# Supplementary material for: Circadian gene variants and the skeletal muscle circadian clock contribute to the evolutionary divergence in longevity across Drosophila populations
Source: PubMed Central journal article supplement — Genome Res. 2019 Aug;29(8):1262–76. doi: 10.1101/gr.246884.118 (PMC6673717; doi:10.1101/gr.246884.118), 2019-08
Supplement: supp_gr.246884.118_Supplemental_Table_S10.pdf [file supp_gr.246884.118_Supplemental_Table_S10.pdf]

**Supplemental Table S10. qRT-PCR oligonucleotides.**

*alphaTub84B* (control): 5'-GTTTGTCAAGCCTCATAGCCG-3' and 5'-GGAAGTGTTTCACACGCGAC-3'

*Ets21C*: 5'-CCGGGCACTCAGGTACTACT-3' and 5'-CGGCGTGGTGATTGTAGGAA-3'

*tim*: 5'-AATGCATTGGCCATTCTGGAG-3' and 5'-AATCCAATGGCCCGTCGAA-3'

*per*: 5'-TCCAGAACGGTTGCTACGTC-3' and 5'-CACTGCTTGGGTCCCTGAAA-3'

*Clk*: 5'-GGATGCCAATGCCTACGAGT-3' and 5'-CACCGCAGGTTGTCCATTTG-3'

*cyc*: 5'-GCATCCGAAGGACATAGGCA-3' and 5'-TCGGTCTTAACGGGCAACAT-3'

*cry*: 5'-CAAATGTTCTGCACACGGT-3' and 5'-CCAGGAAGCCCATGTTG-3'

*Pdp1*: 5'-CCGGCCGAGTCAACATTTTC-3' and 5'-TGGAACGAATTGCTTGCGTG-3'

*vri*: 5'-AGGCTTCTAACTTGCATCCGT-3' and 5'-CGACTGGGCCATTCCAT-3'

*Mal-B1*: 5'-TGGAGAACGGAACCTCGTGTG-3' and 5'-GGCGGGATTTTCGGTAGTTCA-3'

*Pepck2*: 5'-CTTCGGCGACTATCTGGGTC-3' and 5'-GAACTTGCCCTCACTGCTCT-3'
