# Supplementary material for: Circadian gene variants and the skeletal muscle circadian clock contribute to the evolutionary divergence in longevity across Drosophila populations
Source: HighWire-hosted journal article supplement (doi:10.1101/gr.246884.118), 2019-06-27
Supplement: Supplemental_Table_S1.xlsx [file Supplemental_Table_S1.xlsx]

## Sheet: Legend
Supplemental Table S1
List of genomic variants identified in B3, O1 and O3 genotypes compared to the reference genome.
Genomic location, associated genes, amino acid substitutions, and the frequency of occurrence in each genotype are shown.
Small variants and large variants are separated into distinct worksheets.

## Sheet: Small Variants
Category	missense substitution score	Chromosome	Position	Ref	Allele	Gene_Within	Protein	Gene_Nearest	To_TSS	To_TES	B3 Freq	O1 Freq	O3 Freq	B-O freq	p_B3O1	p_B3O3	p_O1O3
missense	-4	3R	149303	GG	AT	FBgn0037234	CG9795-RC:p.[Gly220Ile]; CG9795-RB:p.[Gly183Ile]; CG9795-RD:p.[Gly183Ile]; CG9795-RA:p.[Gly32Ile]				1	0.37544	0.280953	0.671803	0.00117328	0.00471449	0.557629
missense	-4	2R	17657209	GG	CT	FBgn0050395	CG30395-RB:p.Gly817Leu				0	0.254353	0.303917	-0.279135	0.00357613	2.21e-06	0.303577
missense	-3	3L	9439146	G	T	FBgn0053926	CG33926-RA:p.Asp127Tyr				1	0.42316	0	0.78842	0.0164934	1.33e-14	0.19374
missense	-3	3R	26036698	T	G	FBgn0000276	CecA1-RA:p.Val10Gly				0	0.55185	0.385713	-0.468782	0.00860057	0.000844979	0.246809
missense	-3	2R	12009132	T	G	FBgn0010052	Jhe-RA:p.[Val321Gly]; Jhe-RB:p.[Val321Gly]				0.588977	0.2	0.22549	0.376232	0.0087197	0.0282626	0.517313
missense	-3	3L	11828619	A	C	FBgn0262366	CG43064-RA:p.Tyr392Asp				0	0.52206	0.65831	-0.590185	0.00362631	1.36e-05	0.200804
missense	-3	3L	11828447	A	G	FBgn0262366	CG43064-RA:p.Leu449Pro				0	0.547223	0.57383	-0.560527	4.74e-05	9.97e-05	0.599822
missense	-3	3R	20690122	A	G	FBgn0039239	CG13641-RA:p.Trp103Arg				0	0.45238	0.601367	-0.526873	0.00166699	0.0468669	0.535686
missense	-3	3L	5473500	CC	AT	FBgn0035607	CG4835-RA:p.Pro135Ile				1	0.663257	0.376327	0.480208	0.00419508	0.022765	0.190709
missense	-3	3L	12852044	G	A	FBgn0052107	CG32107-RB:p.Pro766Leu				1	0.547407	0.41889	0.516852	0.0101174	0.0112299	0.23022
missense	-3	2L	15728938	GC	CA	FBgn0010382	CycE-RB:p.[Gly584Val]; CycE-RA:p.[Gly691Val]; CycE-RC:p.[Gly691Val]; CycE-RD:p.[Gly691Val]; CycE-RE:p.[Gly691Val]; CycE-RF:p.[Gly694Val]				0.64831	0	0.1875	0.55456	0.00485315	0.0109846	0.372024
missense	-3	2L	12426098	G	T	FBgn0032428	CG6405-RA:p.Gly317Val				0.92857	0	0.21875	0.819195	0.00020316	0.00111145	0.374668
missense	-3	2L	1183562	A	G	FBgn0031320	CG5126-RA:p.Cys120Arg				0.98148	0.386365	0	0.788298	0.00761903	7.63e-07	0.148664
missense	-3	2R	18095227	G	A	FBgn0034711	CG3290-RA:p.Pro83Leu				0	0.780703	0.863157	-0.82193	0.00615567	0.000225657	0.638906
missense	-3	X	20808630	A	T	FBgn0261675	Npc1b-RA:p.Asp789Val				1	0.45455	0	0.772725	0.00501249	1.37e-14	0.373783
missense	-3	3L	1311934	A	C	FBgn0035206	CG9186-RA:p.[Val307Gly]; CG9186-RB:p.[Val307Gly]				1	0	0	1	5.87e-15	7.55e-15	0.563582
missense	-3	3L	1312382	A	T	FBgn0035206	CG9186-RA:p.[Trp158Arg]; CG9186-RB:p.[Trp158Arg]				0.48344	0	0	0.48344	3e-05	3.01e-05	0.439819
missense	-3	3L	1312743	C	A	FBgn0035206	CG9186-RA:p.[Gly57Val]; CG9186-RB:p.[Gly57Val]				0	1	0.968253	-0.984127	1.75e-14	6.82e-06	0.376684
missense	-3	2R	7106602	A	T	FBgn0033582	CG9084-RB:p.Leu24His				1	0	0.385415	0.807292	1.03e-14	0.00490487	0.123795
missense	-3	3R	18563322	C	A	FBgn0039016	Dcr-1-RA:p.Asp1127Tyr				0.51389	0	0	0.51389	0.00105184	0.00105542	0.162971
missense	-3	2R	9848744	A	T	FBgn0013770	Cp1-RC:p.Arg16Trp				1	0	0	1	1.72e-13	8.11e-14	0.698779
missense	-3	2R	7756836	A	G	FBgn0033661	CG13185-RC:p.[Leu5211Pro]; CG13185-RB:p.[Leu4967Pro]				0.322513	0.704417	0.78712	-0.423255	0.0360305	0.0189026	0.480026
missense	-3	2L	8359008	C	A	FBgn0032026	CG7627-RA:p.[Gly415Val]; CG7627-RB:p.[Gly415Val]				1	0.400375	0.35771	0.620957	0.0192017	0.00446157	0.909317
missense	-3	3L	7757449	T	A	FBgn0023076	Clk-RF:p.[Asn917Ile]; Clk-RA:p.[Asn979Ile]; Clk-RD:p.[Asn983Ile]				1	0.14286	0	0.92857	3.65e-05	1.12e-14	0.368974
missense	-3	2L	7687446	A	T	FBgn0040299	Myo28B1-RB:p.[His1506Leu]; Myo28B1-RA:p.[His1505Leu]; Myo28B1-RE:p.[His457Leu]				0.851967	0.5	0.30075	0.451592	0.0259173	0.0114314	0.870297
missense	-3	2R	13656227	G	A	FBgn0034279	CG18635-RA:p.Pro359Leu				0.792917	0	0	0.792917	3.29e-07	3.28e-07	0.333683
missense	-3	2R	16156066	T	C	FBgn0034493	CG8908-RB:p.[Leu1136Pro]; CG8908-RA:p.[Leu1096Pro]				0.97531	0	0	0.97531	2.49e-06	2.49e-06	0.950804
missense	-3	2R	16156083	GA	CT	FBgn0034493	CG8908-RB:p.[Glu1142Leu]; CG8908-RA:p.[Glu1102Leu]				1	0.20202	0.39194	0.70302	3.78e-05	0.00610232	0.703544
missense	-3	3L	11807551	A	G	FBgn0259140	CG42255-RA:p.Leu28Pro				0.530403	0	0	0.530403	2.35e-05	2.35e-05	0.101865
missense	-3	3L	7027036	C	T	FBgn0260660	mp-RL:p.[Pro236Leu]; mp-RB:p.[Pro236Leu]; mp-RM:p.[Pro236Leu]; mp-RO:p.[Pro236Leu]; mp-RG:p.[Pro236Leu]; mp-RQ:p.[Pro236Leu]				0	0.971013	0.737747	-0.85438	4.77e-06	0.00499722	0.158649
missense	-3	2R	18553441	A	T	FBgn0262141	CG42867-RB:p.Asn64Ile				1	0.18182	0	0.90909	0.000101402	1.8e-14	0.376756
missense	-3	3L	9961998	C	T	FBgn0026404	Nc-RA:p.Pro4Leu				0.7501	0	0	0.7501	0.000946285	0.000947273	0.185147
missense	-3	2L	7699739	G	C	FBgn0041182	TepII-RA:p.[Ser331Trp]; TepII-RB:p.[Ser331Trp]; TepII-RC:p.[Ser331Trp]; TepII-RE:p.[Ser331Trp]; TepII-RD:p.[Ser331Trp]				0.846377	0.28431	0	0.704222	0.00656129	0.000427023	0.128068
missense	-3	2L	7699420	TG	CA	FBgn0041182	TepII-RA:p.[Pro437Leu]; TepII-RB:p.[Pro437Leu]; TepII-RC:p.[Pro437Leu]; TepII-RE:p.[Pro437Leu]; TepII-RD:p.[Pro437Leu]				0.986667	0.678263	0.59127	0.3519	0.033578	0.00145542	0.467068
missense	-3	2L	7694338	G	A	FBgn0041182	TepII-RA:p.[Pro1278Leu]; TepII-RB:p.[Pro1257Leu]; TepII-RC:p.[Pro1255Leu]; TepII-RE:p.[Pro1246Leu]; TepII-RD:p.[Pro1266Leu]				0.862747	0.256945	0	0.734274	0.0180919	0.00327648	0.20879
missense	-3	2R	18375928	T	A	FBgn0034734	CG4554-RA:p.Val1626Glu				1	0	0	1	4.12e-14	1.22e-14	0.927623
missense	-3	3L	20009761	T	A	FBgn0261574	kug-RA:p.[Leu2373His]; kug-RB:p.[Leu2373His]				0.661133	0	0	0.661133	0.00550858	0.00552231	0.12371
missense	-3	2L	20025768	A	T	FBgn0032839	CG10659-RA:p.Ile5Asn				0.740093	0	0	0.740093	0.00559327	0.00559173	0.832247
missense	-3	2R	10526798	C	T	FBgn0261632	CG42715-RA:p.Pro30Leu				0.97701	0.43651	0.15	0.683755	0.0257113	7.21e-05	0.075812
missense	-3	X	19084667	T	A	FBgn0030994	CG14193-RA:p.Leu120His				1	0	0	1	8.76e-15	2.09e-14	0.114586
missense	-3	3L	11060390	T	A	FBgn0025355	SuUR-RA:p.Val546Glu				0.654473	0	0	0.654473	0.000306466	0.000306128	0.335626
missense	-3	3L	11060153	T	A	FBgn0025355	SuUR-RA:p.Val467Glu				0.659723	0	0	0.659723	0.00186194	0.00186	0.408258
missense	-3	3R	26610736	G	T	FBgn0004606	zfh1-RB:p.[Asp682Tyr]; zfh1-RA:p.[Asp375Tyr]				0.366523	0	0	0.366523	0.0254263	0.0253474	0.229109
missense	-3	3R	8795865	G	A	FBgn0038098	CG7381-RB:p.[Pro112Leu]; CG7381-RD:p.[Pro112Leu]; CG7381-RA:p.[Pro199Leu]				0.32538	0	0	0.32538	7.42e-05	7.42e-05	0.492038
missense	-3	3L	5432401	G	T	FBgn0085420	CG34391-RC:p.[Gly354Val]; CG34391-RB:p.[Gly113Val]				1	0.521273	0.543477	0.467625	0.000530562	0.0112541	0.853223
missense	-3	3L	19793029	A	T	FBgn0036906	CG14102-RA:p.Ile369Asn				0.63629	0	0	0.63629	0.00117437	0.00117401	0.820636
missense	-3	3R	12864669	C	A	FBgn0038470	CG18213-RB:p.Gly240Val				0.286997	0.74044	0.69762	-0.432033	0.0193635	0.0280401	0.708437
missense	-3	2L	19362787	A	T	FBgn0024245	dnt-RA:p.Val18Glu				0.92778	0.10526	0.19048	0.77991	7.13e-05	0.000315953	0.715228
missense	-3	2R	10132930	T	A	FBgn0033917	CG8503-RA:p.Ile368Asn				0.20238	0.876397	0.711623	-0.59163	0.00237377	0.024779	0.290882
missense	-3	3L	19529524	G	T	FBgn0036881	Cpr76Bd-RB:p.Gly943Val				0.61376	0.23077	0.29412	0.351315	0.00469316	0.00945591	0.285481
missense	-3	3R	24536670	T	A	FBgn0027655	htt-RA:p.Ile1524Asn				0.579167	0	0	0.579167	0.00161005	0.00160917	0.703705
missense	-3	3L	18980994	C	A	FBgn0036836	CG11619-RA:p.Asp89Tyr				0.862283	0.336365	0.15263	0.617786	0.00588616	0.000219611	0.40371
missense	-3	3R	20897357	T	G	FBgn0039272	CG11836-RH:p.Val21Gly				0.30807	0	0	0.30807	0.00557002	0.00556921	0.973582
missense	-3	2R	7717625	A	C	FBgn0033654	Sobp-RA:p.Val181Gly				0.75	0.27273	0.443135	0.392068	0.00203285	0.0446083	0.321065
missense	-3	2R	3684301	T	C	FBgn0002891	mus205-RA:p.Cys854Arg				0.181923	0	0	0.181923	0.0147717	0.0147876	0.844584
missense	-3	X	2147330	A	T	FBgn0029608	CG3091-RB:p.Val131Asp				1	0	0.555945	0.722028	7.35e-14	0.0400421	0.152176
missense	-3	2L	6764979	A	C	FBgn0031857	CG11321-RB:p.Val1511Gly				0.67304	0	0.075495	0.635293	3.16e-05	0.000109817	0.116553
missense	-3	2L	6764847	A	T	FBgn0031857	CG11321-RB:p.Ile1555Asn				0.705813	0	0.375	0.518313	3.64e-06	0.0100629	0.371997
missense	-3	2R	12319825	T	A	FBgn0034126	CG4398-RA:p.Ile3Asn				0.494793	0	0	0.494793	0.000849277	0.000848906	0.881263
missense	-3	3R	16477787	G	A	FBgn0028422	KaiRIA-RA:p.Arg48Trp				0.589223	0	0	0.589223	0.000959446	0.000960125	0.640463
missense	-3	3L	5797928	T	G	FBgn0015806	CG42272-RC:p.[Tyr334Asp]; CG42272-RE:p.[Tyr184Asp]				0.47902	1	1	-0.52098	0.00404473	0.00404359	0.902473
missense	-3	2L	13969746	G	A	FBgn0028542	nimB4-RA:p.Arg55Cys				0	0.435693	0.48394	-0.459817	0.0121094	0.00108337	0.696282
missense	-3	2L	6560705	G	A	FBgn0031832	CG9596-RB:p.Pro288Leu				1	0.549277	0.69798	0.376372	0.0274477	0.0471366	0.433517
missense	-3	2R	18066780	C	T	FBgn0034705	CG30279-RA:p.Pro32Leu				1	0	0	1	1.67e-15	2.55e-14	0.499207
missense	-3	2R	18067008	A	T	FBgn0034705	CG30279-RA:p.Glu108Val				0	0.677777	0.805557	-0.741667	0.0137511	0.00130799	0.53864
missense	-3	2R	2931778	C	T	FBgn0033133	Tsp42Ek-RA:p.[Pro149Leu]; Tsp42Ek-RB:p.[Pro149Leu]				0.77798	0	0.255415	0.650273	2.49e-07	0.00408142	0.170421
missense	-3	3L	15575028	T	A	FBgn0036514	CG12301-RA:p.Val327Glu				0	0.498363	0.581197	-0.53978	0.0456472	0.000989226	0.681322
missense	-3	2L	10184657	G	A	FBgn0028675	Sur-RB:p.Pro1895Leu				1	0.43109	0.6	0.484455	0.00499776	0.0161221	0.361565
missense	-3	3L	9444024	A	C	FBgn0035996	CG3448-RB:p.Val203Gly				0	0.73897	0.443433	-0.591202	0.00587063	0.00654801	0.142683
missense	-3	4	754093	T	A	FBgn0005666	bt-RC:p.[Leu731His]; bt-RF:p.[Leu946His]; bt-RG:p.[Leu671His]				0	0.553873	0.73893	-0.646402	0.020527	4.12e-05	0.295765
missense	-3	2L	13280128	C	T	FBgn0032497	CG6108-RA:p.Pro918Leu				0	0.381003	0.52564	-0.453322	0.0319827	3.29e-05	0.297986
missense	-3	3R	20641582	G	A	FBgn0027617	CG5808-RA:p.Arg365Cys				1	0.4	0	0.8	0.0061186	3.51e-15	0.126487
missense	-3	2L	8187380	C	T	FBgn0031993	CG8486-RI:p.[Arg2032Cys]; CG8486-RH:p.[Arg2051Cys]; CG8486-RE:p.[Arg2190Cys]; CG8486-RF:p.[Arg2152Cys]; CG8486-RJ:p.[Arg2102Cys]; CG8486-RG:p.[Arg2167Cys]				0.257153	0	0	0.257153	0.0314095	0.031585	0.053627
missense	-3	3L	11071147	G	T	FBgn0036124	CG7839-RA:p.Asp1002Tyr				0.714647	0	0	0.714647	0.0132238	0.0132048	0.358096
missense	-3	2R	16170226	A	T	FBgn0034498	CG16868-RA:p.Val1260Glu				1	0	0	1	2.04e-14	1e-14	0.618482
missense	-3	3L	18741350	T	A	FBgn0036812	Nufip-RA:p.Asn20Ile				0.74082	0.15385	0	0.663895	0.000730401	0.00015254	0.376046
missense	-3	3R	21128892	G	T	FBgn0051370	CG31370-RB:p.Asp183Tyr				0.671977	0.228175	0.205557	0.455111	0.0230216	0.0189954	0.560074
missense	-3	2R	10496736	T	A	FBgn0026427	Su(var)2-HP2-RB:p.[Asp1051Val]; Su(var)2-HP2-RA:p.[Asp2675Val]				0	0.857143	1	-0.928572	0.00389956	2.11e-14	0.373526
missense	-3	2R	10503302	G	A	FBgn0026427	Su(var)2-HP2-RA:p.Pro561Leu				0.948717	0	0	0.948717	4.95e-05	4.95e-05	0.841379
missense	-3	2R	14512317	G	A	FBgn0034366	Atg7-RB:p.[Arg50Cys]; Atg7-RA:p.[Arg50Cys]				0.437587	0	0	0.437587	0.0382989	0.0383702	0.291185
missense	-3	2L	6717829	C	T	FBgn0031851	CG11188-RA:p.Pro40Leu				0.664207	0	0	0.664207	0.00190697	0.0019067	0.935815
missense	-3	3R	1618358	G	T	FBgn0037377	CG1218-RA:p.Gly222Cys				0.750837	0.28571	0.224057	0.495953	0.0114947	0.0190131	0.355752
missense	-3	2L	4449835	G	A	FBgn0031606	CG15439-RA:p.Pro903Leu				0.464383	0	0	0.464383	0.00476301	0.0047779	0.199888
missense	-3	3L	12763793	A	T	FBgn0036309	Hip1-RB:p.[Val546Asp]; Hip1-RA:p.[Val583Asp]				1	0.396303	0.125	0.739348	0.0124452	2.1e-05	0.0717238
missense	-3	2L	7156576	CG	GA	FBgn0085407	Pvf3-RD:p.Pro30Leu				0.257143	0	0	0.257143	0.00878068	0.00878883	0.783027
missense	-3	2R	3533134	A	T	FBgn0263077	CG43340-RO:p.[Lys2204Ile]; CG43340-RN:p.[Lys2204Ile]; CG43340-RM:p.[Lys2204Ile]				0.22559	0	0	0.22559	0.0344672	0.0344763	0.943569
missense	-3	2R	3531553	A	T	FBgn0263077	CG43340-RO:p.[Glu1677Val]; CG43340-RN:p.[Glu1677Val]; CG43340-RM:p.[Glu1677Val]				0.25043	0	0	0.25043	0.0479849	0.0479082	0.48838
missense	-3	2R	3528787	A	T	FBgn0263077	CG43340-RO:p.[Asp755Val]; CG43340-RN:p.[Asp755Val]; CG43340-RM:p.[Asp755Val]				0.30788	0	0	0.30788	0.000386824	0.000386766	1
missense	-3	3L	11680276	T	G	FBgn0036191	Sug-RD:p.[Tyr219Asp]; Sug-RC:p.[Tyr219Asp]; Sug-RE:p.[Tyr219Asp]				1	0.52989	0.389387	0.540362	0.0249336	0.00277318	0.869158
missense	-3	2R	18557316	T	A	FBgn0040658	CG13516-RA:p.Val71Asp				0.83532	0	0	0.83532	0.00021805	0.000217861	0.51701
missense	-3	3R	26871956	A	T	FBgn0010015	CanA1-RB:p.[Asn545Ile]; CanA1-RA:p.[Asn571Ile]				0.521627	0	0	0.521627	0.019923	0.0199391	0.486991
missense	-3	3L	13956994	A	G	FBgn0025874	Meics-RA:p.Trp211Arg				0	0.426853	0.765877	-0.596365	0.0481006	0.00056976	0.116755
missense	-3	3R	13495976	C	A	FBgn0038533	CG7523-RA:p.Gly122Val				0.958333	0	0	0.958333	2.14e-05	2.14e-05	0.196221
missense	-3	3L	13921519	A	T	FBgn0036386	CG8833-RA:p.Val144Glu				0	0.53069	0.339947	-0.435318	0.0331005	0.00167758	0.330104
missense	-3	3L	2659000	A	C	FBgn0264606	CG14950-RB:p.Val85Gly				1	0.19643	0.43939	0.68209	0.000276498	0.0112029	0.40617
missense	-3	3L	2658712	A	C	FBgn0264606	CG14950-RB:p.Val181Gly				1	0.15339	0.246347	0.800132	1.37e-06	0.000311793	0.241213
missense	-3	3L	2658754	T	A	FBgn0264606	CG14950-RB:p.His167Leu				0.927537	0	0	0.927537	0.000213355	0.000213591	0.157986
missense	-3	2L	4795447	G	T	FBgn0031628	CG3294-RB:p.[Asp237Tyr]; CG3294-RA:p.[Asp237Tyr]				0	0.55303	0.25368	-0.403355	0.0452797	0.000290249	0.196885
missense	-3	2L	399912	T	A	FBgn0031251	CG4213-RA:p.Asp522Val				0	0.31536	0.710227	-0.512793	0.0454599	0.00248544	0.0601374
missense	-3	2L	19064557	T	A	FBgn0032750	CG10495-RA:p.Val372Glu				0.725927	0	0.325755	0.563049	4.79e-05	0.0115632	0.116077
missense	-3	2L	16702029	A	C	FBgn0263745	CG31782-RA:p.[Val351Gly]; CG31782-RB:p.[Val521Gly]				0.226517	0.79939	0.676193	-0.511275	0.00876613	0.00122842	0.360349
missense	-3	2L	16702074	T	A	FBgn0263745	CG31782-RA:p.[Lys336Ile]; CG31782-RB:p.[Lys506Ile]				0	0.77946	0.616667	-0.698063	0.00250397	7.53e-05	0.250539
missense	-3	2L	8448315	A	T	FBgn0027780	U26-RA:p.Val309Asp				0	0.280117	0.23261	-0.256363	0.0452617	0.0174766	0.698337
missense	-3	3L	15048294	G	T	FBgn0261090	CG13463-RA:p.Asp125Tyr				0	0.462887	0.376847	-0.419867	0.0495662	0.000134705	0.635407
missense	-3	2L	19382625	T	C	FBgn0032772	CG17350-RA:p.Trp189Arg				0.773833	0	0.17647	0.685598	0.000501329	0.00170105	0.376437
missense	-3	2L	8428408	C	T	FBgn0027932	Akap200-RD:p.[Pro458Leu]; Akap200-RA:p.[Pro374Leu]				0.852813	0.409923	0.383525	0.456089	0.0301168	0.0135084	0.450823
missense	-3	3L	18897452	G	A	FBgn0027057	CSN1b-RA:p.Pro124Leu				0.92778	0.18237	0	0.836595	0.00087897	1.81e-05	0.21136
missense	-3	2R	13025025	T	G	FBgn0034200	CG11395-RA:p.Val51Gly				1	0.24375	0.43003	0.66311	0.000663532	0.000612857	0.06358
missense	-3	2L	12103955	T	C	FBgn0027081	Aats-thr-RA:p.Trp21Arg				0.548943	0	0	0.548943	0.00954245	0.00954811	0.627545
missense	-3	3R	24972057	C	A	FBgn0039641	CG14511-RA:p.Gly156Val				1	0.533335	0.390277	0.538194	0.0238937	3.75e-05	0.859802
missense	-3	2L	8053038	A	T	FBgn0031981	CG7466-RA:p.His2896Leu				0.909723	0.16667	0.416667	0.618055	0.000393708	0.0270912	0.0675461
missense	-3	4	1138604	A	C	FBgn0039928	cals-RA:p.[Val637Gly]; cals-RB:p.[Val637Gly]				0.307255	0.700603	1	-0.543047	0.0326423	0.00165748	0.056787
missense	-3	3R	16954294	T	G	FBgn0038858	CG5793-RA:p.[Val122Gly]; CG5793-RC:p.[Val122Gly]				0.510167	0	0	0.510167	0.00484239	0.00484186	0.962676
missense	-3	3L	20291232	T	A	FBgn0052226	CG32226-RA:p.Asp1149Val				0	0.969697	0.78268	-0.876188	5.68e-06	0.00290481	0.206261
missense	-3	3R	13628255	A	G	FBgn0038548	CG17806-RA:p.Leu195Pro				0	0.496377	0.125303	-0.31084	0.0243971	0.00321426	0.0597467
missense	-3	2R	3406946	T	G	FBgn0033187	CG2144-RA:p.Val23Gly				0.811593	0	0.136365	0.743411	0.00132982	0.00323223	0.15679
missense	-3	3R	20744862	A	T	FBgn0039249	CG11168-RC:p.[Asp143Val]; CG11168-RA:p.[Asp143Val]				0.232323	0	0	0.232323	0.0333019	0.0332451	0.288272
missense	-3	3L	194739	C	A	FBgn0035106	rno-RB:p.[Gly1179Val]; rno-RC:p.[Gly1179Val]; rno-RD:p.[Gly1179Val]				0.631027	1	1	-0.368973	0.0272556	0.0273134	0.509456
missense	-3	2R	18437941	C	T	FBgn0003175	CG6018-RA:p.Pro55Leu				0.132163	0	0	0.132163	0.0049595	0.00496217	0.924573
missense	-3	2L	15021171	T	G	FBgn0260446	GABA-B-R1-RB:p.[Val26Gly]; GABA-B-R1-RC:p.[Val26Gly]				0.420753	0	0	0.420753	0.0163481	0.0163291	0.575766
missense	-3	2L	15027969	T	A	FBgn0260446	CG33310-RA:p.Leu189His				0.69327	0.125	0	0.63077	0.0107334	0.00740934	0.370822
missense	-3	3L	5667055	A	T	FBgn0085447	sif-RF:p.[Asp320Val]; sif-RB:p.[Asp320Val]				1	0	0	1	1.81e-14	3.06e-15	0.929872
missense	-3	2L	4971948	T	A	FBgn0010607	CG14043-RA:p.Ile46Asn				0.988507	0.722223	0.68402	0.285385	0.009486	0.0102081	0.681269
missense	-3	3L	1722304	A	T	FBgn0027594	CG18171-RA:p.Ile241Asn				0.69736	0	0	0.69736	0.000218814	0.000218888	0.823938
missense	-3	2L	15941591	A	T	FBgn0028645	CG12448-RC:p.Asn29Ile				0.658333	0	0.13636	0.590153	7.74e-06	0.000263911	0.375167
missense	-3	2L	13256035	GG	AT	FBgn0051728	CG31728-RC:p.Gly268Met				1	0.76923	0.445055	0.392858	0.0440422	0.00911484	0.897616
missense	-3	3L	22254689	A	G	FBgn0028500	CG9063-RA:p.Cys364Arg				1	0.337915	0.320797	0.670644	0.00435768	0.00206322	0.590798
missense	-3	3L	1436432	G	A	FBgn0003138	SA-2-RD:p.[Arg345Trp]; SA-2-RC:p.[Arg345Trp]				0.46454	0	0	0.46454	0.0256847	0.0256749	0.795123
missense	-3	3L	1399903	A	T	FBgn0003138	CG32320-RC:p.Glu271Val				0	0.901963	0.744923	-0.823443	0.000217852	0.000560131	0.201365
missense	-3	3L	1352006	T	A	FBgn0003138	312-RA:p.Val234Glu				0.544517	0	0	0.544517	0.0153696	0.0153411	0.181016
missense	-3	2R	18517890	T	G	FBgn0053143	CG33143-RB:p.Cys425Gly				0.752183	0	0	0.752183	1.3e-05	1.3e-05	0.131325
missense	-3	3L	8587696	G	T	FBgn0262508	CG43078-RE:p.[Asp1235Tyr]; CG43078-RB:p.[Asp1266Tyr]; CG43078-RJ:p.[Asp1235Tyr]; CG43078-RH:p.[Asp1266Tyr]; CG43078-RA:p.[Asp1210Tyr]; CG43078-RC:p.[Asp683Tyr]; CG43078-RI:p.[Asp683Tyr]; CG43078-RG:p.[Asp1181Tyr]				0.715997	0.190883	0.48	0.380555	0.00259957	0.029606	0.864552
missense	-3	3R	1486762	C	T	FBgn0046222	CG1109-RA:p.[Pro26Leu]; CG1109-RB:p.[Pro26Leu]				0.245653	0	0	0.245653	0.0383097	0.0384189	0.459398
missense	-3	2L	269295	C	T	FBgn0031238	CG3345-RA:p.Pro35Leu				0.52	0	0	0.52	1.25e-05	1.25e-05	0.363888
missense	-3	2L	7714350	A	C	FBgn0053296	CG33296-RB:p.Val502Gly				1	0.76171	0.770973	0.233658	0.0405666	0.015981	0.931988
missense	-3	2R	9438346	A	T	FBgn0053156	CG33156-RE:p.Val39Asp				0.386697	1	1	-0.613303	0.000546638	0.000547833	0.151241
missense	-3	2R	7746580	T	G	FBgn0013756	Mtor-RA:p.Val1960Gly				0.203923	0	0	0.203923	0.0160634	0.0160435	0.699637
missense	-3	3L	11287225	TC	AT	FBgn0036152	CG6175-RB:p.Asp155Ile				0.428363	0	0	0.428363	0.00349625	0.00350216	0.539368
missense	-3	2R	17170569	T	C	FBgn0034611	CG10069-RB:p.Cys34Arg				1	0	0	1	4.37e-14	2.5e-14	0.881124
missense	-3	3R	16480047	A	T	FBgn0038818	Nep4-RB:p.[Leu671His]				0.16667	0.371833	0.58968	-0.314087	0.0121143	0.0407467	0.286019
missense	-3	2R	11648695	A	T	FBgn0050089	CG30089-RA:p.Glu1243Val				0.529283	0	0	0.529283	0.00311988	0.00312383	0.502481
missense	-3	2R	13021998	CC	TT	FBgn0034198	CG11400-RA:p.Pro96Leu				1	0.36	0.473313	0.583343	0.00184939	0.00170107	0.0641952
missense	-3	2L	415803	A	T	FBgn0263933	ebi-RA:p.Asn117Ile				0.191073	0	0	0.191073	0.000104484	0.000104718	0.821737
missense	-3	3R	24694526	C	T	FBgn0264324	CG31048-RC:p.[Pro1938Leu]; CG31048-RB:p.[Pro1938Leu]				1	0.410257	0.35	0.619872	0.0254728	0.00621157	0.473231
missense	-3	2L	21296680	T	C	FBgn0032940	Gr39a-RA:p.Cys123Arg				1	0	0	1	1.11e-13	5.53e-14	0.747948
missense	-3	3L	4170661	C	T	FBgn0261274	Ero1L-RB:p.Arg4Cys				0.44485	0.23077	0	0.329465	0.0377443	0.00856352	0.375296
missense	-3	2R	16987070	T	C	FBgn0085425	CG34396-RD:p.Leu485Pro				0.272127	0	0	0.272127	0.0044298	0.00443997	0.334901
missense	-3	3L	7359034	T	A	FBgn0035772	Sh3beta-RE:p.Asp257Val				0	0.631587	0.35513	-0.493358	0.00592739	5.11e-06	0.0805408
missense	-3	3R	10629060	C	T	FBgn0038262	CG14857-RA:p.Pro369Leu				1	0.731773	0.424153	0.422037	0.0169799	0.0303016	0.176626
missense	-3	3L	595935	T	G	FBgn0035145	MED14-RA:p.[Val712Gly]; MED14-RB:p.[Val490Gly]				0.632273	0	0	0.632273	0.00703169	0.00702782	0.752239
missense	-3	3L	12759040	AT	TC	FBgn0052113	CG32113-RB:p.Asn3157Ile				0	0.429363	0.251783	-0.340573	0.0439979	0.0258157	0.342512
missense	-3	2L	2947985	C	T	FBgn0041111	lilli-RA:p.[Pro427Leu]; lilli-RB:p.[Pro427Leu]; lilli-RC:p.[Pro427Leu]; lilli-RG:p.[Pro427Leu]; lilli-RD:p.[Pro368Leu]; lilli-RE:p.[Pro368Leu]; lilli-RF:p.[Pro368Leu]				0.35926	0	0	0.35926	0.00092957	0.000924911	0.170679
missense	-3	3R	9228386	A	T	FBgn0053977	CG33977-RA:p.Ile86Lys				0.45508	0	0	0.45508	0.0187812	0.018765	0.600092
missense	-3	2L	19913135	C	A	FBgn0263873	Victoria-RA:p.Asp109Tyr				0.735757	0	0	0.735757	0.000849649	0.000851065	0.120186
missense	-3	2L	13709005	G	T	FBgn0051814	CG7311-RC:p.[Gly139Val]; CG7311-RD:p.[Arg146Ser]				0.698563	0	0	0.698563	0.00036326	0.000363574	0.379705
missense	-3	2R	9023214	G	T	FBgn0259876	Cap-G-RG:p.[Gly731Cys]; Cap-G-RF:p.[Gly731Cys]				0.384427	0	0	0.384427	0.032643	0.0325075	0.077129
missense	-3	X	13484334	A	T	FBgn0086674	Tango13-RB:p.Asn476Ile				0.805763	0.26667	0	0.672428	0.00667267	0.00164411	0.374152
missense	-3	3R	13486582	AA	TG	FBgn0038532	CG14322-RA:p.Asn104Cys				0.972223	0.411257	0.433517	0.549837	0.037032	0.00780622	0.919798
missense	-3	2L	18476012	C	A	FBgn0032681	CG10283-RA:p.[Arg239Ile]; CG10283-RB:p.[Arg239Ile]; CG10283-RC:p.[Arg239Ile]; CG10283-RD:p.[Arg239Ile]				0.187393	0	0	0.187393	0.000371673	0.000370691	0.728402
missense	-3	2R	15353056	G	T	FBgn0260934	par-1-RQ:p.[Gly304Cys]; par-1-RH:p.[Gly304Cys]; par-1-RI:p.[Gly304Cys]; par-1-RJ:p.[Gly304Cys]; par-1-RO:p.[Gly304Cys]				0.89394	0	0	0.89394	0.00109167	0.00109096	0.65194
missense	-3	X	1353576	G	A	FBgn0027794	CG14786-RA:p.Pro339Leu				1	0.2	0	0.9	0.000150692	7.02e-15	0.37515
missense	-3	2R	17369875	T	A	FBgn0026369	Sara-RA:p.[Ile49Asn]; Sara-RB:p.[Ile49Asn]				0.21836	1	1	-0.78164	0.000660888	0.000661093	0.830105
missense	-3	2R	17370929	T	G	FBgn0026369	Sara-RA:p.[Cys351Gly]; Sara-RB:p.[Cys351Gly]				0	0.916667	0.956523	-0.936595	0.000389329	2.51e-05	0.693445
missense	-3	3R	13510209	C	A	FBgn0051251	CG31251-RA:p.Gly101Val				1	0.458013	0.26316	0.639413	0.00284595	0.000880895	0.0851232
missense	-3	3R	19457583	A	T	FBgn0051145	CG31145-RC:p.[Val117Glu]; CG31145-RD:p.[Val117Glu]				0.394567	0.15385	0	0.317642	0.0327734	0.0136687	0.372031
missense	-3	3L	2155293	T	A	FBgn0035308	CG15822-RB:p.Glu815Val				0.433017	0	0	0.433017	0.00581224	0.00580527	0.625904
missense	-3	2R	6690930	A	T	FBgn0027499	wde-RA:p.Ile734Lys				0.697373	0	0.16667	0.614038	0.00269803	0.00572726	0.369852
missense	-3	2R	1248169	G	A	FBgn0033021	CG10417-RA:p.[Pro638Leu]; CG10417-RB:p.[Pro638Leu]				0.824083	0	0	0.824083	0.00126918	0.00126995	0.715642
missense	-3	3L	6727998	T	A	FBgn0261934	dikar-RC:p.[Asn1626Ile]; dikar-RD:p.[Asn1768Ile]				0.955557	0.224347	0.233765	0.726501	0.000490128	0.00106642	0.531327
missense	-3	2R	6535722	TG	AA	FBgn0033540	Elp2-RA:p.Cys689Asn				1	0.54018	0.45635	0.501735	0.0278686	0.0364548	0.727836
missense	-3	3R	16792367	T	C	FBgn0002921	Atpalpha-RD:p.Leu806Pro				0.370547	0	0	0.370547	0.00194568	0.00193705	0.06594
missense	-3	2L	4192933	T	A	FBgn0031589	CG3714-RB:p.[His317Leu]; CG3714-RC:p.[His317Leu]; CG3714-RD:p.[His317Leu]; CG3714-RE:p.[His317Leu]; CG3714-RF:p.[His317Leu]				0.09348	0.82206	1	-0.81755	0.00787829	7.46e-06	0.303301
missense	-3	2L	19456945	A	T	FBgn0032785	CG10026-RB:p.[His127Leu]; CG10026-RA:p.[His118Leu]; CG10026-RC:p.[His118Leu]				0.76307	0	0.16667	0.679735	3.35e-05	0.00044752	0.368607
missense	-3	2R	10083087	C	T	FBgn0050069	CG30069-RA:p.Pro3136Leu				0.21429	0.864103	0.83252	-0.634022	0.00236942	0.00108248	0.780885
missense	-3	3R	20483006	GC	TT	FBgn0039215	CG6695-RB:p.[Gly637Val]; CG6695-RA:p.[Gly637Val]				0	0.72214	0.6466	-0.68437	0.00111976	0.0216908	0.719814
missense	-3	3L	1007553	A	C	FBgn0024277	trio-RB:p.[Val39Gly]; trio-RF:p.[Val39Gly]				0.712793	0	0	0.712793	7.25e-05	7.25e-05	0.594581
missense	-3	3L	11535158	C	A	FBgn0259481	Mob2-RA:p.Gly206Cys				0	0.710607	0.33754	-0.524073	0.0111777	0.0188372	0.110559
missense	-3	2R	17094551	C	T	FBgn0034603	Glycogenin-RD:p.Pro320Leu				0.46282	0.933333	1	-0.503847	0.0355167	0.0165398	0.37569
missense	-3	2R	18522936	A	C	FBgn0034748	CG17807-RA:p.Val165Gly				1	0.24359	0	0.878205	0.000956317	6.31e-14	0.167248
missense	-3	3R	25960221	T	A	FBgn0086355	Tpi-RA:p.Asn12Ile				0	0.441203	0.196187	-0.318695	0.00804196	0.0120118	0.0713191
missense	-3	3L	16896574	T	C	FBgn0261565	Lmpt-RK:p.Leu1059Pro				1	0.18182	0.25	0.78409	0.000100647	0.000389282	0.834568
missense	-3	2R	4098188	A	T	FBgn0053087	LRP1-RC:p.Asn334Ile				0.316757	0	0	0.316757	2.51e-07	2.51e-07	0.927225
missense	-3	3L	18859674	C	T	FBgn0036818	CG14074-RA:p.Pro79Leu				1	0	0.33333	0.833335	3.82e-14	0.00132952	0.373542
missense	-3	3L	2957382	C	T	FBgn0262593	Shab-RI:p.[Pro1553Leu]; Shab-RG:p.[Pro1558Leu]				0.634103	0.36364	0	0.452283	0.0157219	8.47e-05	0.37454
missense	-3	3L	16711977	A	T	FBgn0000414	Dab-RC:p.[Glu648Val]; Dab-RD:p.[Glu801Val]; Dab-RE:p.[Glu672Val]; Dab-RA:p.[Glu825Val]; Dab-RB:p.[Glu825Val]				0.9899	0.489743	0.420257	0.5349	0.0120584	0.00947782	0.696456
missense	-3	2R	9331499	T	A	FBgn0013765	cnn-RG:p.[Asn326Ile]; cnn-RH:p.[Asn326Ile]				0.579107	0.13636	0	0.510927	0.00930544	0.00509537	0.379196
missense	-3	3R	10578494	A	G	FBgn0263929	CG7362-RA:p.Cys646Arg				0	0.699333	0.58348	-0.641407	0.0041375	0.000682113	0.434751
missense	-3	2R	6643696	A	C	FBgn0053144	CG33144-RA:p.[Val378Gly]; CG33144-RB:p.[Val378Gly]				0.783067	0	0.19231	0.686912	0.00209941	0.00725245	0.131274
missense	-3	3R	11132750	C	T	FBgn0003721	Tm1-RK:p.Pro487Leu				1	0.36364	0	0.81818	0.00192599	2.41e-15	0.375006
missense	-3	3L	10217141	C	A	FBgn0052056	scramb1-RA:p.Gly123Val				0.845087	0.19048	0	0.749847	0.00112973	0.000115598	0.121992
missense	-3	2R	15187291	GT	TC	FBgn0086358	Tab2-RA:p.[Gly196Val]; Tab2-RB:p.[Gly196Val]				0.86457	0.42105	0	0.654045	0.00734696	1.25e-05	0.373061
missense	-3	3L	17488110	T	G	FBgn0036732	CG32185-RA:p.Val41Gly				1	0.18182	0.49644	0.66087	0.000101675	0.0305108	0.0574519
missense	-3	3L	16974607	A	T	FBgn0261547	Exn-RD:p.[Glu276Val]; Exn-RE:p.[Glu276Val]				0.16275	0	0	0.16275	0.00025887	0.000258943	0.99014
missense	-3	3R	25865979	A	T	FBgn0003511	Sry-beta-RA:p.Glu131Val				0.979167	0	0	0.979167	1.21e-06	1.21e-06	0.884488
missense	-3	2L	5953953	A	T	FBgn0031752	CG9044-RB:p.Asp966Val				0.621297	0.10526	0	0.568667	9.1e-05	6.86e-07	0.370444
missense	-3	3R	6068826	G	T	FBgn0261928	CG42795-RA:p.[Arg945Ile]; CG42795-RB:p.[Arg824Ile]				1	0	0.2	0.9	3.1e-14	0.000152016	0.372065
missense	-3	2R	14584257	T	C	FBgn0262103	CG15071-RA:p.Leu40Pro				1	0.597223	0.725803	0.338487	0.0142671	0.00625914	0.308615
missense	-3	2R	4785383	T	C	FBgn0033339	sec31-RB:p.[Leu1057Pro]; sec31-RA:p.[Leu1056Pro]				1	0.41875	0.35068	0.615285	0.025967	0.00488202	0.864169
missense	-3	3R	9224575	G	A	FBgn0038149	CG9796-RA:p.Pro228Leu				1	0.46154	0.17647	0.680995	0.00534453	8.86e-05	0.595072
missense	-3	2R	7869523	C	A	FBgn0053145	CG33145-RB:p.[Asp215Tyr]; CG33145-RA:p.[Asp215Tyr]				0.333333	0	0	0.333333	0.0184187	0.0184429	0.422814
missense	-3	3R	12961999	C	T	FBgn0038484	CG5246-RA:p.Arg25Cys				0.607027	0	0	0.607027	0.00104813	0.0010503	0.160732
missense	-3	3R	21077062	AA	TT	FBgn0039302	Nup358-RB:p.[Lys397Ile]; Nup358-RA:p.[Lys397Ile]				1	0.372053	0.47778	0.575083	0.00396877	0.0146713	0.800393
missense	-3	2R	12442133	G	T	FBgn0034135	Syn2-RE:p.Gly4Val				1	0.210525	0.08333	0.853073	0.000357546	3.99e-06	0.238415
missense	-3	3L	8174307	C	T	FBgn0035848	CG7979-RA:p.Pro56Leu				0.914253	0.17647	0.205265	0.723386	0.000377636	0.000794148	0.436756
missense	-3	2R	11857519	AT	TC	FBgn0013988	Strn-Mlck-RO:p.[Ile5056Glu]; Strn-Mlck-RK:p.[Ile5056Glu]; Strn-Mlck-RL:p.[Ile5056Glu]; Strn-Mlck-RQ:p.[Ile5056Glu]; Strn-Mlck-RH:p.[Ile5056Glu]; Strn-Mlck-RD:p.[Ile5056Glu]; Strn-Mlck-RP:p.[Ile5056Glu]				0	0.49213	0.465917	-0.479023	0.00733362	0.00062155	0.820489
missense	-3	2R	11864615	C	A	FBgn0013988	Strn-Mlck-RO:p.[Gly2691Cys]; Strn-Mlck-RK:p.[Gly2691Cys]; Strn-Mlck-RL:p.[Gly2691Cys]; Strn-Mlck-RQ:p.[Gly2691Cys]; Strn-Mlck-RH:p.[Gly2691Cys]; Strn-Mlck-RD:p.[Gly2691Cys]; Strn-Mlck-RP:p.[Gly2691Cys]				0.320513	0	0	0.320513	0.0104747	0.0104973	0.358456
missense	-3	2R	11863342	T	A	FBgn0013988	Strn-Mlck-RO:p.[Glu3115Val]; Strn-Mlck-RK:p.[Glu3115Val]; Strn-Mlck-RL:p.[Glu3115Val]; Strn-Mlck-RQ:p.[Glu3115Val]; Strn-Mlck-RH:p.[Glu3115Val]; Strn-Mlck-RD:p.[Glu3115Val]; Strn-Mlck-RP:p.[Glu3115Val]				0.242143	0.0525967	0.09107	0.17031	0.00968623	0.0287627	0.834207
missense	-3	2L	19364398	C	T	FBgn0032770	CG13086-RA:p.Pro2Leu				0.880703	0	0.10526	0.828073	0.000131139	0.000272421	0.37216
missense	-3	3L	443132	A	G	FBgn0001316	klar-RD:p.Leu1739Pro				0.643693	1	1	-0.356307	0.0187422	0.0187576	0.79013
missense	-3	3R	21904613	C	T	FBgn0039411	Dys-RC:p.[Arg3562Cys]; Dys-RB:p.[Arg2107Cys]; Dys-RD:p.[Arg2292Cys]				0	1	1	-1	4.31e-14	1.04e-14	0.127709
missense	-3	3R	21903873	C	T	FBgn0039411	Dys-RC:p.[Arg3357Trp]; Dys-RB:p.[Arg1902Trp]; Dys-RD:p.[Arg2087Trp]				0.453543	0	0	0.453543	0.00068922	0.000689537	0.79736
missense	-3	3R	21903492	C	T	FBgn0039411	Dys-RC:p.[Arg3230Trp]; Dys-RB:p.[Arg1775Trp]; Dys-RD:p.[Arg1960Trp]				0.401657	0	0	0.401657	0.000115319	0.000115066	0.469354
missense	-3	2L	13449201	C	A	FBgn0263354	Hsp60D-RA:p.[Gly49Val]; Hsp60D-RB:p.[Gly49Val]				0	0.552767	0.51852	-0.535643	0.0119529	0.00102592	0.817478
missense	-3	2L	8992154	A	T	FBgn0032085	CG9555-RB:p.[Asp31Val]; CG9555-RA:p.[Asp31Val]				0.96154	0.52632	0.221287	0.587737	0.0118704	7.41e-05	0.806417
missense	-3	3L	1647271	G	A	FBgn0035249	CG17249-RA:p.Arg44Trp				0.947473	0	0.30769	0.793628	4.07e-06	0.00134895	0.376355
missense	-3	3R	1562553	AT	CG	FBgn0037370	CG1236-RA:p.Ile15Arg				0.91759	0.255557	0.385713	0.596955	0.000232719	0.0108835	0.359874
missense	-3	3R	8820787	C	A	FBgn0038105	yellow-f2-RA:p.Gly14Val				0.258727	0	0	0.258727	0.0396518	0.0398155	0.101005
missense	-3	2R	3016126	G	A	FBgn0015038	Cyp9b1-RA:p.Pro345Leu				0.27273	1	0.891177	-0.672858	0.000566444	0.00167559	0.118415
missense	-3	2R	3016189	A	G	FBgn0015038	Cyp9b1-RA:p.Leu324Pro				0.14479	1	0.833893	-0.772157	4.91e-05	0.000877677	0.0686388
missense	-3	3R	3628838	G	A	FBgn0037520	CG18268-RA:p.Arg331Cys				0.919597	0.384525	0.47619	0.489239	0.025446	0.000687133	0.307461
missense	-3	2R	9556602	T	G	FBgn0000633	CG18368-RA:p.Tyr415Asp				0.652777	1	1	-0.347223	0.0234452	0.0234395	0.934077
missense	-3	3R	3371735	G	A	FBgn0015568	alpha-Est1-RA:p.Arg553Trp				0.322603	0	0	0.322603	0.0163959	0.0163558	0.471406
missense	-3	3R	8813896	A	C	FBgn0051342	CG14383-RA:p.Cys109Gly				0.37885	0.923077	0.844443	-0.50491	0.00733991	0.0156244	0.533956
missense	-3	3R	26250513	A	T	FBgn0039766	CG15536-RA:p.Ile116Lys				0.446097	0	0.146955	0.372619	0.000246636	0.0051739	0.128716
missense	-3	3L	7719410	C	A	FBgn0052373	CG7457-RA:p.Asp16Tyr				1	0.186205	0	0.906898	0.000149585	1.08e-14	0.117322
missense	-3	3L	7661731	A	T	FBgn0052373	Ank2-RU:p.Val10808Glu				1	0.1875	0	0.90625	0.000113947	3.28e-16	0.373982
missense	-3	3L	7678915	G	A	FBgn0052373	Ank2-RU:p.Pro5080Leu				0.33131	0	0	0.33131	0.017452	0.0174572	0.799277
missense	-3	3L	16857097	C	T	FBgn0036671	CG9951-RA:p.Pro251Leu				0	0.310607	0.670993	-0.4908	0.0325645	0.00153187	0.0505405
missense	-3	2L	12713368	T	A	FBgn0032455	CG5792-RA:p.His327Leu				0.398517	1	1	-0.601483	0.00126207	0.00126198	0.970916
missense	-3	3R	5240142	G	T	FBgn0011740	alpha-Man-II-RA:p.Asp447Tyr				0.80202	0.2875	0.11111	0.602715	0.0051406	4.78e-05	0.247755
missense	-3	2R	18052066	A	C	FBgn0000008	CG34206-RA:p.Cys12Gly				0.61122	0.14286	0	0.53979	0.0382484	0.0268582	0.373273
missense	-3	3R	16986691	T	A	FBgn0264357	CG10824-RA:p.Asp29Val				0.47619	0.10526	0	0.42356	0.000474553	3.65e-05	0.367332
missense	-3	3L	653568	A	G	FBgn0035149	MED30-RA:p.Leu148Pro				0.699073	0	0	0.699073	0.000668971	0.000668754	0.810729
missense	-3	3L	6741059	GT	TA	FBgn0035713	CG10107-RA:p.[Asn1093Ile]; CG10107-RC:p.[Asn1093Ile]				0.19231	0.676413	0.861823	-0.576808	0.00620053	0.00108365	0.195134
missense	-3	2L	19744581	G	A	FBgn0032817	CG10631-RA:p.Pro3348Leu				0.692317	0	0	0.692317	0.00108997	0.00109053	0.750363
missense	-3	2R	9708159	A	G	FBgn0000662	fl(2)d-RB:p.[Leu247Pro]; fl(2)d-RC:p.[Leu247Pro]; fl(2)d-RD:p.[Leu247Pro]; fl(2)d-RA:p.[Leu371Pro]				0.151777	0	0	0.151777	0.0452874	0.0453298	0.865814
missense	-3	3R	23426597	A	C	FBgn0039528	dsd-RB:p.Tyr804Asp				0.5132	0	0	0.5132	0.00271006	0.00270496	0.398551
missense	-3	X	11470225	T	A	FBgn0000618	e(y)2-RA:p.Glu96Val				1	0	0	1	9.59e-15	4.67e-14	0.59266
missense	-3	2R	12117262	T	A	FBgn0034093	Tsf3-RA:p.Val708Glu				1	0	0	1	4e-14	7.92e-15	0.93074
missense	-3	2L	11089661	G	T	FBgn0032338	CG16854-RB:p.[Asp454Tyr]; CG16854-RC:p.[Asp426Tyr]				0	0.446033	0.663163	-0.554598	0.0332373	0.0114785	0.348993
missense	-3	2L	11982894	T	C	FBgn0032387	CG16965-RB:p.Leu278Pro				0.465277	0	0.22024	0.355157	0.00242212	0.034975	0.122268
missense	-3	3R	11788809	CA	GG	FBgn0038388	CG4287-RA:p.[Leu151Pro]; CG4287-RB:p.[Leu151Pro]				0	0.565337	0.728803	-0.64707	0.0002599	0.000310007	0.10378
missense	-3	3R	11788810	A	G	FBgn0038388	CG4287-RA:p.[Leu151Pro]; CG4287-RB:p.[Leu151Pro]				1	0.434663	0.271197	0.64707	0.000258891	0.000312814	0.10391
missense	-3	2R	9704596	G	T	FBgn0261041	stj-RB:p.[Gly1016Cys]; stj-RD:p.[Gly1035Cys]; stj-RC:p.[Gly1069Cys]				0.175267	0	0	0.175267	0.000901855	0.000906767	0.0586569
missense	-3	3L	9466159	A	T	FBgn0036003	CG14180-RA:p.Lys2Ile				1	0.277895	0	0.861052	0.0010169	4.41e-14	0.122577
missense	-3	3R	5086745	C	T	FBgn0037671	VhaM8.9-RA:p.Arg26Cys				0.579953	0	0	0.579953	0.00202993	0.00202649	0.34299
missense	-3	3L	2058024	T	A	FBgn0086906	sls-RC:p.Glu12927Val				0	0.510797	0.71715	-0.613973	0.0249428	0.00783752	0.374227
missense	-3	3R	4890698	T	A	FBgn0037660	CG18005-RA:p.His5Leu				0.835873	0	0.19048	0.740633	0.000295077	0.00125274	0.372487
missense	-3	2L	7691234	T	A	FBgn0031930	CG7025-RA:p.Glu404Val				0.376905	0.725	0.87037	-0.42078	0.0405094	0.0219691	0.203653
missense	-3	2R	6705056	C	A	FBgn0086898	dgo-RA:p.[Asp477Tyr]; dgo-RB:p.[Asp477Tyr]				0.183335	0.948717	0.91111	-0.746578	0.000508085	0.00189675	0.731197
missense	-3	2L	2975219	A	C	FBgn0031483	CG9641-RB:p.[Cys431Gly]; CG9641-RA:p.[Cys523Gly]				0.358973	0	0.18182	0.268063	0.0100715	0.0391288	0.371505
missense	-3	2R	14527738	T	C	FBgn0262595	CheA56a-RA:p.Trp14Arg				0.48267	0	0	0.48267	0.0143958	0.0143877	0.795361
missense	-3	2L	2878633	C	T	FBgn0051950	CG31950-RA:p.Pro14Leu				0.644063	0.217143	0.21053	0.430227	0.0167398	0.00472926	0.239642
missense	-3	3L	16605821	A	T	FBgn0025558	CG4101-RA:p.Glu49Val				0.56154	0.27778	0	0.42265	0.0384291	0.0104959	0.37598
missense	-3	2R	13574921	A	T	FBgn0034261	HPS4-RB:p.[Asp57Val]; HPS4-RA:p.[Asp81Val]; HPS4-RC:p.[Asp51Val]				0.310407	0	0	0.310407	0.0197205	0.0196744	0.511229
missense	-3	2L	3783229	C	T	FBgn0004893	bowl-RA:p.[Pro727Leu]; bowl-RB:p.[Pro727Leu]; bowl-RC:p.[Pro727Leu]; bowl-RD:p.[Pro727Leu]; bowl-RE:p.[Pro727Leu]; bowl-RF:p.[Pro727Leu]; bowl-RG:p.[Pro727Leu]; bowl-RH:p.[Pro727Leu]				0	0.219147	0.41282	-0.315983	0.00217978	0.0181815	0.157711
missense	-3	2R	12990444	C	T	FBgn0050456	CG30456-RB:p.Arg25Cys				0.881943	0.11111	0.21032	0.721228	0.000272153	0.00174989	0.308076
missense	-3	2R	12993279	A	T	FBgn0050456	CG30456-RB:p.[Glu312Val]; CG30456-RC:p.[Glu73Val]				0.943357	0.13782	0.275647	0.736623	0.000189151	0.000947973	0.107401
missense	-3	3L	7331027	T	A	FBgn0035766	eco-RA:p.[Asn322Ile]; eco-RB:p.[Asn322Ile]				0	0.584187	0.524647	-0.554417	0.0251663	0.0127595	0.789303
missense	-3	2L	16289949	C	T	FBgn0040079	pkaap-RA:p.Arg370Cys				0.84011	0	0	0.84011	8.26e-06	8.25e-06	0.386909
missense	-3	3R	8854117	T	A	FBgn0038111	CG12360-RA:p.[Glu208Val]; CG12360-RB:p.[Glu208Val]				0	0.661093	0.645237	-0.653165	0.0178559	0.0173688	0.949146
missense	-3	2L	6483988	T	C	FBgn0031820	DLP-RA:p.Leu686Pro				1	0.392977	0.208335	0.699344	0.00236884	0.000302475	0.0920152
missense	-3	2R	11343848	T	C	FBgn0263980	CG43223-RE:p.Cys21Arg				1	0	0	1	1.08e-14	1.03e-14	0.560163
missense	-3	3R	6162700	T	C	FBgn0037810	sle-RB:p.[Leu1151Pro]; sle-RA:p.[Leu1141Pro]				1	0.31228	0	0.84386	0.00446181	3.98e-16	0.203806
missense	-3	2L	14031431	A	C	FBgn0028872	CG18095-RB:p.[Ile35Arg]; CG18095-RA:p.[Ile35Arg]				0.836057	0	0	0.836057	0.000171928	0.000171978	0.685485
missense	-3	2R	8312028	C	T	FBgn0033734	CG8520-RA:p.[Arg253Cys]; CG8520-RB:p.[Arg253Cys]				1	0	0	1	4.58e-14	7.4e-14	0.814806
missense	-3	3R	25767125	A	T	FBgn0039727	CG15523-RA:p.Asn1648Ile				0	0.357017	0.262193	-0.309605	0.000530178	0.0151272	0.267516
missense	-3	3R	26956038	A	T	FBgn0039821	CG15556-RA:p.Ile12Lys				0.5422	0	0	0.5422	0.00928617	0.00929253	0.651242
missense	-3	3R	26954761	C	A	FBgn0039821	CG15556-RA:p.Gly418Val				0.504883	0	0	0.504883	7.93e-05	7.9e-05	0.11331
missense	-3	3R	16845526	T	C	FBgn0026056	Rlip-RA:p.Leu492Pro				0.49469	0	0	0.49469	0.0036541	0.00365921	0.604484
missense	-3	2L	1219819	A	T	FBgn0259229	CG42329-RA:p.Glu131Val				0.798297	0	0	0.798297	1.54e-06	1.55e-06	0.79614
missense	-3	2R	17154122	T	A	FBgn0085426	CG30393-RA:p.Asp300Val				1	0.23077	0	0.884615	0.000274092	1.16e-15	0.37219
missense	-3	2L	13906753	A	T	FBgn0012037	Ance-RA:p.[Asp56Val]; Ance-RB:p.[Asp56Val]				0.863097	0	0	0.863097	0.000476459	0.000476668	0.618907
missense	-3	2R	19571278	C	T	FBgn0034888	CG5431-RB:p.[Pro99Leu]; CG5431-RA:p.[Pro99Leu]				0	0.807843	0.74606	-0.776952	0.00111884	0.0041458	0.718132
missense	-3	2L	7605727	T	C	FBgn0031925	Cyp4d21-RA:p.Trp16Arg				0.86032	0.14286	0.246653	0.665563	0.00103058	0.0111645	0.172362
missense	-3	3R	19595845	A	T	FBgn0039117	tst-RA:p.Val859Glu				0	1	1	-1	2.49e-14	1.05e-13	0.404302
missense	-3	2L	3040288	C	T	FBgn0031500	CG17221-RA:p.Arg21Cys				0.27985	0	0	0.27985	0.0228809	0.022867	0.639655
missense	-3	2L	18827847	G	T	FBgn0027070	CG17322-RA:p.[Gly199Val]; CG17322-RB:p.[Gly199Val]; CG17322-RC:p.[Gly199Val]; CG17322-RD:p.[Gly199Val]				0.660057	0	0.27193	0.524092	0.000188548	0.01198	0.136105
missense	-3	3L	1758873	C	G	FBgn0035268	CG8001-RA:p.[Ser695Trp]; CG8001-RB:p.[Ser690Trp]				0.33333	1	0.807693	-0.570517	0.00131954	0.00913147	0.118023
missense	-3	3L	12340310	A	C	FBgn0036278	GRHRII-RA:p.Val253Gly				0.276453	0	0	0.276453	0.000652532	0.000654579	0.131329
missense	-3	3L	16846066	A	G	FBgn0003250	Rh4-RA:p.Leu288Pro				0.77868	0	0	0.77868	0.000368173	0.000367593	0.19124
missense	-3	3R	12186928	G	A	FBgn0038422	CG14880-RA:p.[Arg402Trp]; CG14880-RB:p.[Arg402Trp]				0.68441	0	0	0.68441	0.00614212	0.0061329	0.29849
missense	-3	3R	21119475	G	A	FBgn0051102	CG31102-RA:p.Arg386Cys				0.236763	0	0	0.236763	0.0410392	0.0409184	0.313238
missense	-3	2R	8306778	C	A	FBgn0261853	CG42782-RA:p.Gly8Cys				1	0	0	1	3.55e-15	2.3e-14	0.0595398
missense	-3	3L	13978520	C	A	FBgn0036391	CG17364-RA:p.[Gly30Val]; CG17364-RB:p.[Gly30Val]				0	0.41037	0.549503	-0.479937	0.0117581	0.0278328	0.499517
missense	-3	3L	13979909	G	T	FBgn0036391	CG17362-RA:p.Gly82Val				0.787247	0	0	0.787247	0.00498103	0.00497913	0.709554
missense	-3	2R	12760627	T	G	FBgn0046999	CG6429-RA:p.Val16Gly				0	0.533333	0.670207	-0.60177	0.00630393	0.0107469	0.489547
missense	-3	2R	9856136	C	T	FBgn0020766	Aats-phe-RA:p.Arg75Cys				0.939877	0	0	0.939877	7.07e-06	7.07e-06	0.295053
missense	-3	2L	3874659	G	A	FBgn0000256	capu-RG:p.[Pro386Leu]; capu-RA:p.[Pro513Leu]; capu-RB:p.[Pro503Leu]; capu-RH:p.[Pro561Leu]; capu-RI:p.[Pro752Leu]; capu-RJ:p.[Pro543Leu]; capu-RE:p.[Pro734Leu]; capu-RF:p.[Pro815Leu]; capu-RD:p.[Pro661Leu]				1	0	0	1	2.63e-14	2.83e-14	0.69909
missense	-3	3L	12416072	A	C	FBgn0036285	toe-RA:p.Val528Gly				0	0.84074	1	-0.92037	0.000525046	6.34e-16	0.127018
missense	-3	3R	1607629	T	G	FBgn0037375	kat-60L1-RD:p.[Val3Gly]; kat-60L1-RH:p.[Val3Gly]; kat-60L1-RA:p.[Val3Gly]; kat-60L1-RF:p.[Val3Gly]				0.207145	0.497713	0.80303	-0.443227	0.0407662	0.00204341	0.0590369
missense	-3	2L	7403251	G	C	FBgn0031907	CG5171-RD:p.Trp8Ser				0.740743	0.32598	0	0.577753	0.0437451	0.00518314	0.146409
missense	-3	2R	9016433	G	A	FBgn0033793	CG3955-RA:p.Pro4Leu				0.28553	0	0	0.28553	0.0395203	0.0394489	0.540742
missense	-3	3R	22773879	AC	TT	FBgn0039463	CG18472-RA:p.Asp81Val				0.07692	0.711053	0.28843	-0.422822	0.0196948	0.00493416	0.0838879
missense	-3	3R	22773879	A	T	FBgn0039463	CG18472-RA:p.Asp81Val				0.97436	0.11765	0	0.915535	3.65e-05	2.84e-06	0.367657
missense	-3	3R	26568865	C	G	FBgn0039799	CG15543-RA:p.Ser67Trp				0.732983	0	0	0.732983	0.00139805	0.00139642	0.385554
missense	-3	3R	20360796	T	A	FBgn0262167	ana1-RA:p.[Leu1360His]; ana1-RB:p.[Leu720His]				0.842593	0.14286	0.12903	0.706648	0.00100812	0.000895406	0.942919
missense	-3	2L	22042313	C	A	FBgn0051601	CG31601-RB:p.[Gly359Val]; CG31601-RC:p.[Gly359Val]				0.92857	0	0	0.92857	2.36e-05	2.36e-05	0.778986
missense	-3	3R	6134580	C	A	FBgn0037807	CG6293-RA:p.Gly477Val				1	0	0	1	3.75e-14	7.19e-15	0.154747
missense	-3	3L	11917682	T	A	FBgn0036222	CG5718-RA:p.Lys37Ile				0.235633	0	0	0.235633	8.12e-05	8.1e-05	0.774082
missense	-3	3L	11915934	C	A	FBgn0036222	CG5718-RA:p.Gly620Cys				0.64815	0.3	0	0.49815	0.00570218	3.93e-06	0.374032
missense	-3	3R	26428887	A	T	FBgn0051021	CG31021-RB:p.Lys239Ile				0.64719	0.31884	0.22249	0.376525	0.0397353	0.0162206	0.652669
missense	-3	3R	26428767	A	T	FBgn0051021	CG31021-RB:p.Asp199Val				0	0.570477	0.630953	-0.600715	0.0442971	1.4e-05	0.775058
missense	-3	3L	1798085	G	T	FBgn0035273	CG12020-RA:p.Asp241Tyr				0.615383	0	0	0.615383	0.0220403	0.0220572	0.502111
missense	-3	2L	3520575	TA	AC	FBgn0031546	CG8851-RA:p.Leu66His				0	0.453373	0.349693	-0.401533	0.0256745	0.00365222	0.507434
missense	-3	2L	13132601	T	A	FBgn0032471	CG5122-RA:p.Val607Glu				0.18182	0.64753	0.52353	-0.40371	0.04041	0.00304309	0.551701
missense	-3	2L	15548011	A	T	FBgn0259922	CG42448-RA:p.Glu131Val				0.57819	0	0.13333	0.511525	0.00133986	0.0032761	0.379023
missense	-3	2R	17660982	A	T	FBgn0034659	CG4021-RA:p.Glu27Val				1	0.1875	0	0.90625	0.000114114	3.36e-15	0.37543
missense	-3	2L	9921311	T	G	FBgn0032161	CG4594-RA:p.Val278Gly				0.843837	0.17647	0.42857	0.541317	0.000220386	0.00828253	0.61602
missense	-3	3L	20959465	A	G	FBgn0037040	CG12983-RD:p.[Cys98Arg]; CG12983-RB:p.[Cys98Arg]; CG12983-RE:p.[Cys98Arg]; CG12983-RC:p.[Cys98Arg]				0	0.700177	0.740037	-0.720107	0.00739153	1.23e-05	0.793385
missense	-3	3R	11092499	CT	AA	FBgn0038311	CG14864-RB:p.[Glu511Val]; CG14864-RA:p.[Glu532Val]				0.767283	0.36278	0.287303	0.442242	0.0233311	0.0290093	0.800898
missense	-3	2R	14573700	C	A	FBgn0034374	CG15086-RF:p.[Gly141Val]; CG15086-RE:p.[Gly141Val]				0	0.417583	0.415673	-0.416628	0.0386435	0.000616352	0.991602
missense	-3	3R	26076164	T	C	FBgn0085328	CG34299-RA:p.Leu147Pro				1	0.548485	0.408887	0.521314	0.0400449	0.00144571	0.856178
missense	-3	3R	23290831	C	T	FBgn0039518	CG13978-RA:p.Pro268Leu				0.0830433	0	0	0.0830433	0.0300828	0.0303135	0.497728
missense	-3	3R	18210618	C	T	FBgn0263048	CG43343-RA:p.[Pro795Leu]; CG43343-RC:p.[Pro794Leu]; CG43343-RB:p.[Pro782Leu]				0.652777	0	0.35714	0.474207	0.000199004	0.0144863	0.373631
missense	-3	3R	25957038	G	A	FBgn0051029	CG31029-RA:p.Pro279Leu				0.17857	0.566667	0.47619	-0.342858	0.0395121	0.0358837	0.671795
missense	-3	2R	10770972	C	T	FBgn0033980	Cyp6a20-RB:p.Pro403Leu				0.303033	1	0.896823	-0.645378	2.14e-05	0.000594151	0.118377
missense	-3	2R	10769836	T	C	FBgn0033980	Cyp6a20-RB:p.Leu67Pro				0.32251	0	0	0.32251	0.0263572	0.0263161	0.487742
missense	-3	2L	6962373	G	A	FBgn0031878	sip2-RA:p.[Pro387Leu]; sip2-RD:p.[Pro387Leu]; sip2-RE:p.[Pro387Leu]; sip2-RC:p.[Pro402Leu]; sip2-RB:p.[Pro419Leu]				0.8	0	0	0.8	1.64e-13	1.79e-13	0.832917
missense	-3	2R	12250760	T	A	FBgn0034121	CG6262-RE:p.[Trp216Arg]; CG6262-RD:p.[Trp325Arg]				0	0.477733	0.261963	-0.369848	0.0124971	2.66e-06	0.12357
missense	-3	2R	12249598	G	T	FBgn0034121	CG6262-RA:p.[Gly633Val]; CG6262-RB:p.[Gly458Val]; CG6262-RC:p.[Gly57Val]				1	0.4375	0.264363	0.649068	0.00425546	0.000328394	0.49663
missense	-3	2L	11342648	C	A	FBgn0032360	CG14926-RA:p.Gly137Val				0.438997	0	0	0.438997	0.0311102	0.0310028	0.076855
missense	-3	2L	8390911	A	T	FBgn0262002	CG42820-RA:p.Ile415Lys				1	0.46154	0.33	0.60423	0.00534069	0.00139296	0.373476
missense	-3	2L	4646003	G	T	FBgn0031617	CG15635-RB:p.Gly981Val				0.641883	0.246325	0.168673	0.434384	0.0144319	0.00133581	0.973149
missense	-3	2L	4645259	G	T	FBgn0031617	CG15635-RB:p.Gly733Val				0.107167	0	0	0.107167	3.78e-06	3.78e-06	0.982621
missense	-3	2L	4645129	G	T	FBgn0031617	CG15635-RB:p.Gly690Cys				0.0369	0	0	0.0369	0.0439992	0.0427299	0.121207
missense	-3	2L	4644824	G	T	FBgn0031617	CG15635-RB:p.Gly588Val				0.305557	0.108825	0	0.251144	0.017891	0.00301605	0.120683
missense	-3	2R	17657119	CC	AT	FBgn0050395	CG30395-RB:p.Pro787Ile				0	0.69925	0.764643	-0.731947	0.00979231	2.47e-05	0.696063
missense	-3	2R	17655555	T	C	FBgn0050395	CG30395-RB:p.Leu530Pro				0.98889	0.182395	0.15293	0.821227	0.00016387	9.75e-05	0.824764
missense	-3	2R	17655032	G	T	FBgn0050395	CG30395-RB:p.Gly428Val				1	0.52381	0.11859	0.6788	0.00911132	3.23e-05	0.624794
missense	-3	2L	6802009	G	A	FBgn0031859	CG17377-RC:p.Pro189Leu				0.925827	0.375	0	0.738327	0.00319443	1.29e-06	0.372541
missense	-3	2L	17012612	G	A	FBgn0032624	CG6304-RA:p.Pro88Leu				0.90476	0	0.175595	0.816963	8e-05	0.000672339	0.129561
missense	-3	3R	26454033	A	C	FBgn0039792	CG2267-RA:p.Val156Gly				1	0.45772	0.356725	0.592777	0.0132973	0.00997341	0.78836
missense	-3	2L	10640817	G	T	FBgn0051872	CG31872-RA:p.Gly291Val				0	0.63016	0.97436	-0.80226	0.013136	2.81e-06	0.0839663
missense	-3	2R	17720999	T	A	FBgn0054040	CG34040-RA:p.Asn5Ile				0.788053	0.27273	0	0.651688	0.00285804	0.000149652	0.373084
missense	-3	2L	6665337	C	T	FBgn0000392	cup-RB:p.Pro282Leu				0.50516	0	0	0.50516	0.0243184	0.0243092	0.864724
missense	-3	3R	21866467	AC	TA	FBgn0000591	E(spl)-RA:p.Asp141Val				1	0	0	1	2.57e-14	1.95e-14	0.861545
missense	-3	3L	6117912	A	T	FBgn0002440	l(3)mbn-RB:p.Val422Glu				0.15625	0.475383	0.37199	-0.267437	0.00352895	0.00839877	0.166592
missense	-3	3R	25079651	T	A	FBgn0003525	stg-RA:p.Lys30Ile				0.232803	0	0	0.232803	0.0136662	0.0137143	0.368269
missense	-3	2L	3578397	G	A	FBgn0004892	sob-RA:p.Pro546Leu				0.28261	1	0.77143	-0.603105	0.00132659	0.0203807	0.127646
missense	-3	2L	3578397	GG	AA	FBgn0004892	sob-RA:p.Pro546Leu				0.785953	0	0.342855	0.614526	0.000551869	0.0173359	0.126368
missense	-3	2R	13768104	A	T	FBgn0011589	CG30110-RA:p.Val518Glu				0.0859567	0.910257	1	-0.869172	0.000784197	8.11e-10	0.376321
missense	-3	2L	10820228	G	T	FBgn0011676	CG6508-RA:p.Gly369Val				0.615337	0.236015	0	0.497329	0.0339201	0.00528475	0.162083
missense	-3	2L	21183801	T	A	FBgn0011829	Ret-RD:p.[Asp1029Val]; Ret-RA:p.[Asp1027Val]; Ret-RB:p.[Asp1027Val]; Ret-RC:p.[Asp1027Val]; Ret-RE:p.[Asp1027Val]				0.756617	0	0	0.756617	0.00433925	0.00433611	0.654373
missense	-3	3L	1476444	A	G	FBgn0020248	stet-RA:p.[Leu241Pro]; stet-RB:p.[Leu396Pro]				0.913873	0	0	0.913873	4.6e-06	4.6e-06	0.0742265
missense	-3	2L	11936851	TA	AG	FBgn0026391	Or33b-RA:p.Ile224Lys				0.402273	0	0	0.402273	0.0414851	0.0414954	0.914628
missense	-3	2L	4164917	A	T	FBgn0026394	Or24a-RB:p.Trp344Arg				0.900253	0	0	0.900253	0.000116976	0.000117015	0.834104
missense	-3	2L	13972795	A	T	FBgn0028430	He-RB:p.Ile32Lys				0.898147	0.65385	0.12	0.511222	0.0419864	0.000555364	0.467459
missense	-3	2L	16334725	T	A	FBgn0028899	CG31817-RB:p.Lys987Ile				0	0.184877	0.478777	-0.331827	0.00247357	0.0196245	0.0863556
missense	-3	2L	16334089	A	T	FBgn0028899	CG31817-RB:p.Ile1199Asn				0.26816	1	0.93813	-0.700905	5.79e-05	0.000253362	0.163866
missense	-3	3L	909746	C	T	FBgn0028999	nerfin-1-RA:p.Pro150Leu				0	0.70238	0.90909	-0.805735	0.00265589	0.000564714	0.213033
missense	-3	X	5396445	T	A	FBgn0029770	CG4151-RA:p.Ile180Asn				1	0	0	1	1.06e-14	3.21e-14	0.764463
missense	-3	X	11383665	C	A	FBgn0030307	CG33235-RA:p.Gly631Val				0.144343	0	0	0.144343	0.00666952	0.00669273	0.631132
missense	-3	X	20803591	T	A	FBgn0031139	CG11227-RB:p.[Lys288Ile]; CG11227-RA:p.[Lys277Ile]				1	0	0	1	4.04e-14	4.01e-14	0.975866
missense	-3	2L	881045	G	A	FBgn0031292	CG15824-RA:p.Arg1139Cys				0.754903	0.389095	0.13043	0.495141	0.020568	0.000140494	0.19323
missense	-3	2L	2384514	G	T	FBgn0031422	CG9870-RA:p.Gly388Val				1	0.202445	0	0.898778	0.000221605	7.76e-14	0.119283
missense	-3	2L	2842356	T	A	FBgn0031468	CG2975-RA:p.Ile359Asn				0.369777	0.834937	1	-0.547692	0.022074	0.0050658	0.0514206
missense	-3	2L	3271189	CC	TT	FBgn0031513	CG3347-RB:p.Pro399Leu				0.0625	0.473507	0.405413	-0.37696	0.0495257	0.0358265	0.753549
missense	-3	2L	3751778	G	T	FBgn0031568	CG10019-RB:p.Gly968Val				0.785717	0	0	0.785717	0.00198122	0.00197857	0.331566
missense	-3	2L	6738840	A	G	FBgn0031854	TTLL3A-RA:p.Leu446Pro				0.267083	0.857937	0.845613	-0.584692	0.0030277	0.00890558	0.88264
missense	-3	2L	6738839	GA	TG	FBgn0031854	TTLL3A-RA:p.Leu446Pro				0.732917	0.142063	0.23158	0.546095	0.00298078	0.00882051	0.885738
missense	-3	2L	7252691	C	A	FBgn0031900	CG13786-RA:p.Gly28Cys				0.882157	0.265385	0	0.749464	0.0035513	0.000231229	0.12354
missense	-3	2L	9085525	G	T	FBgn0032095	Toll-4-RA:p.Gly77Val				0.865383	0.2	0.15947	0.685648	0.00126851	0.000933056	0.284849
missense	-3	2L	9329459	G	T	FBgn0032109	CG17005-RB:p.Arg469Ile				1	0.283335	0	0.858332	0.00102789	7.2e-14	0.117033
missense	-3	2L	9766001	A	T	FBgn0032142	CG13120-RA:p.Leu251His				0.11765	1	1	-0.88235	1.64e-05	1.64e-05	0.935815
missense	-3	2L	19062735	GT	AA	FBgn0032749	Phlpp-RA:p.Val851Lys				0.369633	0	0	0.369633	0.00114135	0.00114161	0.908946
missense	-3	2L	19078292	C	A	FBgn0032754	CG10700-RA:p.Gly235Val				0.267167	0	0	0.267167	0.00151108	0.00151207	0.816436
missense	-3	2L	19561185	T	A	FBgn0032808	CG13079-RA:p.Ile492Asn				0.922857	0.26087	0.284225	0.650309	0.00105602	0.0035404	0.505178
missense	-3	2R	3226562	A	C	FBgn0033159	Dscam-RBT:p.Val703Gly				0.90705	0	0.416665	0.698717	4.31e-05	0.0230327	0.175328
missense	-3	2R	7149125	A	T	FBgn0033601	Cpr47Ed-RA:p.Val26Glu				0	0.707263	0.6555	-0.681382	0.00283089	0.0203052	0.81478
missense	-3	2R	9645191	T	A	FBgn0033866	CG6280-RA:p.Leu704His				0	0.675313	1	-0.837657	0.010832	8.8e-15	0.0967713
missense	-3	2R	9661724	TC	GT	FBgn0033867	Cpr50Ca-RA:p.Val25Gly				0.437367	0.125	0	0.374867	0.00485642	0.00149328	0.371889
missense	-3	2R	11149416	A	T	FBgn0034005	alphaPS4-RA:p.Lys820Ile				1	0.1	0.06667	0.916665	8.3e-06	1.58e-06	0.796377
missense	-3	2R	13989072	A	T	FBgn0034301	CG5756-RB:p.[Val638Glu]; CG5756-RA:p.[Val1101Glu]				1	0.70588	0	0.64706	0.0313205	3.58e-15	0.374309
missense	-3	2R	15377293	A	T	FBgn0034452	Oseg6-RA:p.Ile585Asn				1	0.25	0	0.875	0.000389616	8.36e-15	0.373576
missense	-3	2R	17726243	C	A	FBgn0034665	CG4372-RA:p.Gly21Cys				0.152207	1	1	-0.847793	4.76e-05	4.77e-05	0.269077
missense	-3	2R	18981446	G	A	FBgn0034821	CG9876-RA:p.Pro16Leu				0.809413	0	0	0.809413	0.00249906	0.00250156	0.512567
missense	-3	2R	20094208	A	G	FBgn0034990	CG11406-RB:p.Trp60Arg				0.69841	0.16848	0.21398	0.50718	0.0118645	0.0150675	0.790409
missense	-3	3L	679543	A	T	FBgn0035151	CG17129-RA:p.[Val68Glu]; CG17129-RB:p.[Val68Glu]; CG17129-RC:p.[Val68Glu]				0.699737	0	0	0.699737	0.000407193	0.000406495	0.336428
missense	-3	3L	679204	T	A	FBgn0035151	CG17129-RA:p.[Glu181Val]; CG17129-RB:p.[Glu181Val]; CG17129-RC:p.[Glu181Val]				0.67645	0	0	0.67645	0.000132613	0.000132524	0.449037
missense	-3	3L	846986	T	C	FBgn0035168	CG13889-RA:p.Leu796Pro				0.14286	1	1	-0.85714	3.64e-05	3.65e-05	0.114097
missense	-3	3L	1611566	A	C	FBgn0035239	CG12105-RA:p.Val1337Gly				0.964913	0	0	0.964913	1.04e-05	1.04e-05	0.5036
missense	-3	3L	4275260	T	C	FBgn0035522	CG1273-RB:p.Leu463Pro				1	0.752923	0.512063	0.367507	0.0433957	0.0084821	0.14195
missense	-3	3L	4481152	T	A	FBgn0035551	CG7465-RA:p.Val248Asp				0.90196	0.230395	0.213657	0.679934	0.00449487	0.00218779	0.518529
missense	-3	3L	4481142	GA	AT	FBgn0035551	CG7465-RA:p.Asp245Ile				0.882353	0.4	0.267115	0.548796	0.00959797	0.00629017	0.801208
missense	-3	3L	7549398	AA	GG	FBgn0035797	CG14837-RC:p.Leu618Pro				0	0.28457	0.531853	-0.408212	0.00247529	0.00619633	0.0860904
missense	-3	3L	8396133	G	A	FBgn0035889	mkg-p-RA:p.[Pro475Leu]; mkg-p-RB:p.[Pro475Leu]				0.544307	0	0	0.544307	0.00711374	0.00710781	0.663096
missense	-3	3L	10423468	C	A	FBgn0036083	Ir67b-RA:p.Gly539Val				0.803883	0.286943	0.24344	0.538692	0.0208639	0.0100523	0.813612
missense	-3	3L	12198965	T	A	FBgn0036266	CG5626-RA:p.His30Leu				0.84395	0	0	0.84395	0.000796818	0.000797539	0.501552
missense	-3	3L	12964779	A	G	FBgn0036327	CG10748-RA:p.Leu218Pro				1	0.44841	0.31818	0.616705	0.0165263	0.00108322	0.401396
missense	-3	3L	16207193	TC	AT	FBgn0036577	CG13073-RB:p.Glu5Ile				0.455917	0	0	0.455917	0.00105707	0.00105346	0.0873461
missense	-3	3L	17362587	A	G	FBgn0036715	Cad74A-RA:p.[Leu1498Pro]; Cad74A-RB:p.[Leu1498Pro]				0.402857	0	0.08333	0.361192	0.00339952	0.00598073	0.371456
missense	-3	3L	18149249	A	G	FBgn0036781	CG13699-RA:p.Trp733Arg				0	0.721723	0.77912	-0.750422	0.00113094	0.000791887	0.660525
missense	-3	3L	19595933	G	T	FBgn0036890	CG9368-RA:p.[Gly134Val]; CG9368-RB:p.[Gly129Val]				0.659343	0.125	0.30769	0.442998	0.000522857	0.00755929	0.608781
missense	-3	3L	19975910	G	T	FBgn0036923	CG17732-RA:p.[Gly261Val]; CG17732-RB:p.[Gly331Val]				1	0.27273	0.31905	0.70411	0.000567065	0.0024921	0.455663
missense	-3	3L	20415314	C	T	FBgn0036985	zye-RA:p.Pro1616Leu				0.58579	0	0	0.58579	0.0225149	0.0225128	0.931733
missense	-3	3R	3743351	C	A	FBgn0037531	CG10445-RC:p.[Gly713Cys]; CG10445-RD:p.[Gly713Cys]				1	0.26795	0.52894	0.601555	0.00324843	0.00254274	0.126547
missense	-3	3R	3910139	C	T	FBgn0037546	CG7918-RA:p.Pro582Leu				0.190407	0	0	0.190407	0.0385069	0.0383077	0.255232
missense	-3	3R	4551651	A	T	FBgn0037618	CG11762-RA:p.Asn133Ile				1	0.507937	0.539753	0.476155	0.015827	0.00460718	0.839204
missense	-3	3R	5969735	C	A	FBgn0037792	CG6241-RA:p.Gly20Val				0.881977	0	0	0.881977	0.000461162	0.000460978	0.684806
missense	-3	3R	8058838	G	A	FBgn0038005	Cyp313a5-RA:p.Pro419Leu				0.86155	0.317643	0.21739	0.594033	0.00431617	0.00174386	0.0512275
missense	-3	3R	8255681	T	A	FBgn0038047	CG5245-RA:p.Leu97His				0.903173	0.26667	0.24081	0.649433	0.0014595	0.00189793	0.593084
missense	-3	3R	8804159	G	T	FBgn0038099	CG7091-RB:p.Gly69Val				0.620257	0.23077	0.2381	0.385822	0.00283156	0.00319306	0.982637
missense	-3	3R	9018037	C	T	FBgn0038125	CG8141-RA:p.Pro189Leu				0.658987	0.42105	0.350583	0.27317	0.0277439	0.00787553	0.210173
missense	-3	3R	10720651	T	A	FBgn0038273	CG14860-RB:p.Val32Asp				1	0.2875	0	0.85625	0.00170992	4.67e-14	0.150228
missense	-3	3R	13906855	CA	GT	FBgn0038566	CG14317-RA:p.His5Val				1	0.33402	0.21131	0.727335	3.79e-07	0.00025968	0.0535769
missense	-3	3R	16870055	C	T	FBgn0038847	CG12278-RA:p.Arg81Trp				0.346603	0	0	0.346603	0.000816764	0.000817943	0.554699
missense	-3	3R	16901714	T	A	FBgn0038851	dmrt93B-RA:p.Val146Glu				0.398137	0	0	0.398137	0.0211378	0.0211361	0.971813
missense	-3	3R	16899744	G	T	FBgn0038851	dmrt93B-RA:p.Gly6Cys				0.34497	0	0	0.34497	0.000244125	0.000244449	0.62955
missense	-3	3R	18155409	A	T	FBgn0038941	CG7080-RA:p.His84Leu				1	0.19697	0.24239	0.78032	0.000218072	0.00054174	0.334604
missense	-3	3R	18167920	A	G	FBgn0038945	CG5386-RA:p.Leu6Pro				0	0.334783	0.451613	-0.393198	0.0188639	0.0053987	0.388582
missense	-3	3R	18527107	C	A	FBgn0039007	Ccap-RA:p.Gly32Val				0.888117	0	0	0.888117	0.000100471	0.000100571	0.291938
missense	-3	3R	18847664	C	A	FBgn0039039	lmd-RB:p.Gly739Cys				0.734253	0	0	0.734253	0.00478046	0.00478038	0.986589
missense	-3	3R	19422681	A	C	FBgn0039093	CG10183-RB:p.Cys573Gly				1	0.532023	0.38111	0.543433	0.00405871	0.00288402	0.289337
missense	-3	3R	20343431	C	T	FBgn0039201	CG13617-RA:p.Pro629Leu				0	0.71896	0.81028	-0.76462	0.000631309	0.00139955	0.510364
missense	-3	3R	20348703	A	T	FBgn0039202	CG13622-RB:p.Val151Asp				0	0.718373	0.666667	-0.69252	0.0122707	0.0193826	0.842444
missense	-3	3R	21886887	T	G	FBgn0039407	CG14544-RA:p.Val286Gly				0.653487	0	0	0.653487	0.00596044	0.00595805	0.639008
missense	-3	3R	23816170	A	C	FBgn0039568	CG4815-RA:p.Ile39Arg				1	0.2975	0.396297	0.653102	0.00763941	0.00167469	0.575314
missense	-3	3R	24178972	T	C	FBgn0039582	Or98b-RA:p.Leu301Pro				1	0.59956	0.538113	0.431163	0.0038433	0.0281781	0.709466
missense	-3	3R	26270485	T	A	FBgn0039771	Osi23-RA:p.Asp91Val				0	0.705507	0.401887	-0.553697	0.00926049	0.00171517	0.128942
missense	-3	3R	26556597	A	G	FBgn0039798	CG11313-RB:p.Leu73Pro				0.826187	0.45455	0.1875	0.505162	0.013388	0.000924289	0.878843
missense	-3	3R	26665644	T	C	FBgn0039804	CG15544-RA:p.Leu558Pro				0.499793	0.26667	0	0.366458	0.0301655	0.00471702	0.373952
missense	-3	2L	11272696	C	T	FBgn0040233	cana-RA:p.Pro486Leu				0.40909	0	0	0.40909	0.0191311	0.019173	0.276975
missense	-3	3L	8167795	T	A	FBgn0040290	RecQ4-RA:p.Asp370Val				0.91852	0.2	0.30808	0.66448	0.000406805	0.00403095	0.349261
missense	-3	3R	13422372	T	C	FBgn0040565	CG7606-RB:p.Cys30Arg				0.10345	0.334127	0.487293	-0.30726	0.00519247	0.0149544	0.246338
missense	-3	2R	3279300	A	T	FBgn0041243	Gr43a-RB:p.[Val232Glu]; Gr43a-RA:p.[Val232Glu]				1	0	0.40111	0.799445	1.84e-14	0.0327479	0.307072
missense	-3	3L	9791819	T	A	FBgn0044051	Ilp1-RA:p.Trp96Arg				0.973333	0	0	0.973333	3.35e-06	3.35e-06	0.884293
missense	-3	3R	17671895	A	G	FBgn0045468	Gr93d-RA:p.Cys163Arg				0	0.570707	0.259363	-0.415035	0.0110627	0.00466467	0.0829792
missense	-3	2L	1784594	G	T	FBgn0045497	Gr22e-RA:p.Gly178Val				0	0.70416	1	-0.85208	0.00355336	4.82e-14	0.060987
missense	-3	2L	1791603	T	A	FBgn0045499	Gr22c-RA:p.Glu74Val				1	0	0	1	5.01e-14	1.1e-13	0.757366
missense	-3	2R	12179395	C	T	FBgn0050100	CG30100-RA:p.Arg26Cys				0	0.249837	0.465277	-0.357557	0.0215492	0.00166048	0.0798175
missense	-3	2R	14095629	T	C	FBgn0050114	CG30114-RA:p.Leu73Pro				0.98148	0	0.183533	0.889713	7.38e-07	0.000389107	0.0590523
missense	-3	2R	9734827	T	A	FBgn0050484	CG30484-RA:p.Val157Glu				0	1	1	-1	5.81e-15	3.86e-14	0.399065
missense	-3	2R	9739998	T	C	FBgn0050485	CG30485-RA:p.Leu868Pro				0.414653	1	0.97619	-0.573442	0.00125893	0.001785	0.370396
missense	-3	3R	26433859	C	T	FBgn0051016	CG31016-RB:p.Pro533Leu				1	0.3953	0.54649	0.529105	0.0112887	0.0245109	0.465178
missense	-3	3R	26433005	A	T	FBgn0051016	CG31016-RB:p.Glu291Val				0	0.59883	0.559723	-0.579277	0.0253356	0.013514	0.866282
missense	-3	2L	18084271	C	T	FBgn0051741	CG31741-RA:p.Arg2Cys				0.34364	0	0	0.34364	0.00018873	0.000188722	1
missense	-3	2L	19259978	T	A	FBgn0051797	CG31797-RA:p.Lys719Ile				0.62807	0	0.327775	0.464182	0.00061	0.0436424	0.156232
missense	-3	2L	13258065	G	T	FBgn0051851	CG31851-RA:p.Gly129Val				0.285647	0	0	0.285647	0.0466538	0.0467165	0.571065
missense	-3	2L	8443121	A	T	FBgn0051897	CG31897-RA:p.Lys160Ile				0	0.78733	0.522223	-0.654777	0.00425476	0.0204414	0.244453
missense	-3	2L	8400819	T	A	FBgn0051898	CG31898-RA:p.Ile115Asn				1	0.631357	0.704957	0.331843	0.000820764	0.00470248	0.327832
missense	-3	2L	3786285	G	T	FBgn0051958	CG31958-RA:p.Gly156Val				0	0.232803	0.489613	-0.361208	0.0134352	0.0450221	0.224098
missense	-3	2L	3786002	G	T	FBgn0051958	CG31958-RA:p.Asp62Tyr				1	0.58077	0.38248	0.518375	0.0408247	0.0153143	0.655935
missense	-3	3L	10211924	C	A	FBgn0052055	CG32055-RA:p.Gly429Cys				0.881483	0	0	0.881483	2.99e-08	2.99e-08	0.511161
missense	-3	3L	11725793	C	T	FBgn0052087	CG32087-RA:p.Pro157Leu				0.936507	0	0	0.936507	0.000121146	0.000121082	0.708552
missense	-3	3L	12635345	T	A	FBgn0052111	CG32111-RA:p.Leu31His				0.2675	0.887137	0.867957	-0.610047	0.00289701	0.00569524	0.793948
missense	-3	3L	17425930	A	G	FBgn0052174	frc-RA:p.[Leu49Pro]; frc-RB:p.[Leu49Pro]				0.605287	0.23529	0	0.487642	0.00406895	0.000133357	0.373639
missense	-3	3L	19381974	A	T	FBgn0052206	CG14087-RB:p.Lys385Ile				0	0.372223	0.215437	-0.29383	1.5e-05	0.0393444	0.0981343
missense	-3	3L	4465755	G	A	FBgn0052241	CG32241-RB:p.Pro240Leu				0.222757	0	0	0.222757	0.000273063	0.000273181	0.92778
missense	-3	3L	2268477	T	G	FBgn0052304	obst-I-RA:p.Val203Gly				0	0.69194	0.815587	-0.753763	0.00552293	0.000295702	0.441824
missense	-3	X	4139795	G	A	FBgn0052774	Muc4B-RB:p.Pro3Leu				0.78788	0	0	0.78788	0.0205238	0.0205058	0.472082
missense	-3	2R	4837376	GG	AA	FBgn0053199	CG8229-RE:p.[Pro239Leu]; CG8229-RD:p.[Pro239Leu]				0.523183	1	0.933007	-0.44332	0.0213732	0.0381763	0.129602
missense	-3	3R	11497943	T	A	FBgn0053207	pxb-RA:p.Ile88Lys				0.31612	0	0	0.31612	0.0182659	0.0182886	0.660849
missense	-3	2R	10943591	C	A	FBgn0053467	CG33467-RA:p.Gly33Val				1	0.335665	0.622043	0.521146	0.00234897	0.0294686	0.0679863
missense	-3	2R	8297766	G	T	FBgn0053626	CG33626-RB:p.Gly41Cys				1	0	0	1	8.01e-14	3.26e-14	0.812756
missense	-3	3L	16193803	G	T	FBgn0053689	CG33689-RA:p.Asp103Tyr				0.371837	0	0	0.371837	0.0114003	0.0114192	0.480888
missense	-3	3R	1703646	C	A	FBgn0083949	CG34113-RO:p.Gly665Val				0	0.62045	0.51515	-0.5678	0.00060827	0.000997165	0.292454
missense	-3	2L	22038489	C	T	FBgn0084001	CG41434-RA:p.Pro153Leu				0.904637	0	0	0.904637	0.000185391	0.000185356	0.85374
missense	-3	2R	4805911	G	A	FBgn0085248	CG34219-RA:p.Pro117Leu				1	0.230265	0.258825	0.755455	0.000403417	0.00221913	0.899655
missense	-3	3L	2028042	C	T	FBgn0085288	CG34259-RB:p.Arg333Cys				0	0.966347	1	-0.983173	7.62e-07	1.06e-14	0.138729
missense	-3	2R	17817131	C	T	FBgn0085397	Fili-RC:p.Pro36Leu				0.32738	1	1	-0.67262	0.0035145	0.00351077	0.409286
missense	-3	3R	24108579	T	G	FBgn0085465	CG34436-RA:p.Val71Gly				0.2	0.474337	0.528703	-0.30152	0.00604996	0.00872764	0.532076
missense	-3	2R	17553607	A	T	FBgn0259708	CG42364-RB:p.Lys49Ile				0.77801	0.205265	0.243055	0.55385	0.00135385	0.00274465	0.831133
missense	-3	2L	14729527	A	C	FBgn0261571	CG42685-RA:p.Tyr159Asp				0.838373	0	0	0.838373	3.28e-05	3.28e-05	0.32856
missense	-3	2L	14729811	A	T	FBgn0261571	CG42685-RA:p.Ile64Lys				1	0	0.33687	0.831565	1.76e-14	0.00883348	0.0722427
missense	-3	2R	10336935	A	T	FBgn0261613	Oaz-RC:p.Glu136Val				0.22524	0	0	0.22524	5.9e-05	5.9e-05	0.891321
missense	-3	2R	10347837	G	T	FBgn0261613	Oaz-RC:p.[Gly266Val]; Oaz-RB:p.[Gly128Val]				0.61833	0	0	0.61833	0.0141564	0.0141333	0.171253
missense	-3	3R	9433320	C	A	FBgn0261818	CG42760-RA:p.Gly75Val				0.614553	0	0	0.614553	0.000291668	0.000291695	0.963709
missense	-3	3R	9434060	C	A	FBgn0261819	CG42761-RA:p.Gly18Val				0	1	1	-1	1.26e-14	2.62e-14	0.777391
missense	-3	2L	16242676	TT	AC	FBgn0262000	CG42818-RB:p.Val199Asp				0.702393	0	0	0.702393	8.8e-06	8.8e-06	0.984157
missense	-3	2L	16244308	C	T	FBgn0262000	CG42818-RB:p.Pro743Leu				0.780013	0	0	0.780013	0.000123512	0.000123509	0.954601
missense	-3	2L	16243297	T	A	FBgn0262000	CG42818-RB:p.Ile406Lys				0.69034	0	0	0.69034	0.000294548	0.000294999	0.0674667
missense	-3	2L	16244233	A	T	FBgn0262000	CG42818-RB:p.His718Leu				0.707897	0	0	0.707897	0.00141996	0.00141821	0.332449
missense	-3	2L	8389266	G	A	FBgn0262001	CG42819-RA:p.Arg2Cys				1	0.86389	0.679367	0.228372	0.0161485	0.00845884	0.0684699
missense	-3	2L	9304519	G	A	FBgn0262033	CG42844-RA:p.Arg56Cys				1	0.176925	0	0.911538	0.000126721	2.44e-14	0.122411
missense	-3	2L	15069496	G	T	FBgn0262526	vas-RB:p.Gly292Val				0.502193	0.1	0	0.452193	0.00768529	0.00473211	0.376186
missense	-3	3R	21822503	A	G	FBgn0262576	CG43116-RA:p.Cys38Arg				0	1	0.902777	-0.951388	1.57e-15	5.51e-05	0.122793
missense	-3	3R	11461257	G	T	FBgn0263040	CG43335-RA:p.Arg23Ile				0.79596	0.38462	0.27619	0.465555	0.03567	0.0349009	0.741762
missense	-3	2L	21167136	C	A	FBgn0263050	CG43345-RB:p.Arg360Ile				0.796297	0	0	0.796297	0.00152009	0.00151977	0.903518
missense	-3	2R	1813914	G	T	FBgn0263109	CG43366-RB:p.Gly682Val				0.93723	0.64286	0.48081	0.375395	0.029794	0.000779039	0.284478
missense	-3	2R	13428641	C	T	FBgn0263113	CG43370-RD:p.Pro586Leu				0.941667	0	0	0.941667	1.33e-05	1.33e-05	0.312986
missense	-3	X	9929426	C	T	FBgn0263132	Cht6-RJ:p.[Pro1537Leu]; Cht6-RK:p.[Pro1537Leu]; Cht6-RC:p.[Pro1537Leu]				0.866667	0	0.28322	0.725057	0.000604316	0.00880444	0.163598
missense	-3	3R	14423860	G	A	FBgn0263974	CG14304-RC:p.[Pro128Leu]; CG14304-RA:p.[Pro128Leu]; CG14304-RB:p.[Pro128Leu]				0	0.211113	0.64912	-0.430117	0.00897223	0.020879	0.0729242
missense	-3	X	1887872	T	G	FBgn0264562	CG3600-RC:p.[Val361Gly]; CG3600-RA:p.[Val206Gly]; CG3600-RB:p.[Val206Gly]				1	0	0	1	9.38e-15	4.42e-15	0.547935
missense	-2	3L	9439369	G	T	FBgn0053926	CG33926-RA:p.Cys201Phe				0.39394	0	0	0.39394	0.00198237	0.00198049	0.802993
missense	-2	2L	21368928	A	G	FBgn0041245	Gr39b-RA:p.Val260Ala				1	0.25	0.11212	0.81894	0.000389665	1.93e-05	0.929966
missense	-2	2L	5329976	A	G	FBgn0031701	TotM-RA:p.[Met11Val]; TotM-RB:p.[Met11Val]				1	0.610577	0.705197	0.342113	0.00513583	0.000600722	0.280934
missense	-2	2L	3019017	A	C	FBgn0031490	CG17264-RA:p.Tyr23Ser				0.261293	0	0	0.261293	0.0117763	0.0118062	0.352599
missense	-2	2R	12009150	C	T	FBgn0010052	Jhe-RA:p.[Ala327Val]; Jhe-RB:p.[Ala327Val]				0.57127	0.29861	0.27299	0.28547	0.015138	0.0366744	0.359411
missense	-2	3L	11829446	C	T	FBgn0262366	CG43064-RA:p.Gly116Glu				0.460573	0.16667	0	0.377238	0.00904333	0.002098	0.375324
missense	-2	2R	16952958	A	G	FBgn0022700	Cht4-RA:p.Leu457Ser				1	0.16667	0.45455	0.68939	7.02e-05	0.00501779	0.583319
missense	-2	3L	12852200	G	A	FBgn0052107	CG32107-RB:p.Ala714Val				1	0.500003	0.452015	0.523991	0.0398606	0.0147604	0.451459
missense	-2	3L	12852662	G	A	FBgn0052107	CG32107-RB:p.Ala560Val				1	0.44272	0.20956	0.67386	0.00899488	0.000537235	0.415649
missense	-2	2L	8354595	CA	TC	FBgn0051901	Mur29B-RA:p.Thr420Ile				0	0.11472	0.0763667	-0.0955433	0.0284587	0.000284847	0.33677
missense	-2	2L	8353938	C	T	FBgn0051901	Mur29B-RA:p.Ala201Val				0.431373	0	0	0.431373	0.00329021	0.00329683	0.473028
missense	-2	3R	10046436	A	C	FBgn0053109	CG33109-RA:p.Leu289Arg				0.496913	1	0.893057	-0.449615	0.000909819	0.00766538	0.127317
missense	-2	3R	10966756	C	G	FBgn0038292	CG3987-RA:p.Pro238Arg				0	0.269697	0.242293	-0.255995	0.00640287	0.00590103	0.710085
missense	-2	2R	17554807	G	T	FBgn0259711	CG42365-RA:p.Cys144Phe				0.73535	0	0	0.73535	0.00126928	0.00126912	0.934753
missense	-2	2L	15811547	C	T	FBgn0262150	CG42876-RA:p.Gly176Arg				0.358017	0	0	0.358017	0.0221437	0.0221623	0.805828
missense	-2	2L	8767165	G	A	FBgn0032066	CG9463-RA:p.Thr443Ile				0.249007	0.98148	0.843743	-0.663605	0.000432026	0.0084409	0.261834
missense	-2	2L	15737758	A	T	FBgn0010382	CycE-RA:p.[Leu76Gln]; CycE-RC:p.[Leu76Gln]; CycE-RD:p.[Leu76Gln]; CycE-RE:p.[Leu76Gln]; CycE-RF:p.[Leu79Gln]				0.441427	0.17647	0	0.353192	0.00958884	0.00154134	0.373965
missense	-2	2L	15737827	A	G	FBgn0010382	CycE-RA:p.[Ile53Thr]; CycE-RC:p.[Ile53Thr]; CycE-RD:p.[Ile53Thr]; CycE-RE:p.[Ile53Thr]; CycE-RF:p.[Ile56Thr]				0.464393	0	0	0.464393	0.0450986	0.0450959	0.970415
missense	-2	2R	7127234	A	G	FBgn0033592	CG13215-RA:p.Val97Ala				0	0.768057	0.629487	-0.698772	0.000125393	0.000557471	0.165358
missense	-2	2R	13643204	C	T	FBgn0034276	CG6385-RA:p.Gly227Glu				0.722223	0	0	0.722223	0.00038508	0.000384771	0.400648
missense	-2	2L	1825579	T	C	FBgn0051664	CG31664-RB:p.Glu177Gly				1	0	0	1	4.66e-14	3.59e-14	0.360987
missense	-2	3R	4351558	G	A	FBgn0051259	CG31259-RA:p.Val386Met				0.61111	0	0	0.61111	0.03642	0.0364882	0.181796
missense	-2	2L	7083568	A	G	FBgn0031888	Pvf2-RA:p.Val19Ala				1	0.35771	0.307473	0.667408	0.00462133	0.000115006	0.701004
missense	-2	2L	7083196	G	T	FBgn0031888	Pvf2-RA:p.Ala143Asp				1	0.384617	0.38573	0.614827	0.00591924	0.00968128	0.996194
missense	-2	2L	18141163	C	T	FBgn0041184	Socs36E-RB:p.[Gly291Glu]; Socs36E-RA:p.[Gly291Glu]				0.311953	0	0	0.311953	0.0022776	0.00228242	0.5146
missense	-2	2L	18142091	G	T	FBgn0041184	Socs36E-RB:p.[Ala146Asp]; Socs36E-RA:p.[Ala146Asp]				0.344537	0	0	0.344537	0.0148679	0.014909	0.291041
missense	-2	2L	18081702	C	T	FBgn0002939	ninaD-RB:p.[Ala13Val]; ninaD-RA:p.[Ala13Val]				1	0.28526	0.54762	0.58356	0.00263164	0.0310748	0.488226
missense	-2	2L	10696625	A	G	FBgn0032286	CG7300-RB:p.[Val467Ala]; CG7300-RC:p.[Val409Ala]				0	0.21502	0.51321	-0.364115	1.69e-05	0.0157458	0.0798414
missense	-2	2L	10696109	C	T	FBgn0032286	CG7300-RB:p.[Gly639Glu]; CG7300-RC:p.[Gly581Glu]				0	0.31466	0.416153	-0.365407	0.00355303	0.00431015	0.312176
missense	-2	2L	10697222	G	A	FBgn0032286	CG7300-RB:p.[Ala268Val]; CG7300-RC:p.[Ala210Val]				0	0.565337	0.591667	-0.578502	0.031499	0.00446869	0.902305
missense	-2	2L	19567034	CT	TG	FBgn0032810	CG13077-RA:p.Ala183Val				0.883473	0	0.25	0.758473	0.000121263	0.0014496	0.374736
missense	-2	2L	8396055	G	A	FBgn0040959	Peritrophin-15a-RA:p.Ser3Phe				1	0.27778	0.15469	0.783765	0.000606105	3.55e-06	0.548997
missense	-2	2L	2592127	G	C	FBgn0250835	CG15394-RB:p.Gly16Arg				0.27381	0.16667	0	0.190475	0.047781	0.00706586	0.375853
missense	-2	2R	11578276	T	C	FBgn0050090	CG30090-RA:p.Val245Ala				0.47243	0	0	0.47243	0.00455175	0.00454413	0.455138
missense	-2	2R	11577766	C	G	FBgn0050090	CG30090-RA:p.Arg91Gly				0.458463	0	0	0.458463	0.021862	0.0218344	0.397622
missense	-2	2R	11582050	T	C	FBgn0053460	CG33460-RA:p.Phe102Ser				0.328467	0	0	0.328467	0.0267247	0.0266641	0.501217
missense	-2	3L	17751656	C	T	FBgn0036752	CG32182-RA:p.Thr131Ile				1	0.31993	0.295833	0.692118	0.00264506	0.00232917	0.626254
missense	-2	3R	16699883	G	T	FBgn0038838	TotB-RA:p.Trp42Leu				0.602977	0	0	0.602977	0.000145337	0.000145524	0.513424
missense	-2	3L	9612659	A	C	FBgn0002528	LanB2-RA:p.Asp444Ala				0.96047	0	0	0.96047	1.71e-06	1.71e-06	0.364643
missense	-2	2R	18540995	C	T	FBgn0034756	Cyp6d2-RA:p.Val286Met				0.83592	0	0	0.83592	0.000114977	0.000115031	0.677939
missense	-2	3R	6520810	T	C	FBgn0262717	Skeletor-RE:p.[Val1185Ala]; Skeletor-RD:p.[Val394Ala]				0.23968	0.791007	0.710517	-0.511082	0.00463344	0.00305388	0.380776
missense	-2	2L	10705297	T	C	FBgn0024740	Lip2-RA:p.Arg163Gly				1	0.342245	0	0.828878	0.0030761	7.33e-14	0.131682
missense	-2	2L	10704266	G	A	FBgn0024740	CG6415-RA:p.Gly193Arg				0.98485	0.338383	0.60875	0.511283	0.00225559	0.0301984	0.137338
missense	-2	3L	2167916	A	G	FBgn0035309	CG15879-RA:p.Ile295Thr				0.50663	0	0.2	0.40663	1.41e-05	0.00318339	0.37469
missense	-2	3L	1312414	G	A	FBgn0035206	CG9186-RA:p.[Thr147Ile]; CG9186-RB:p.[Thr147Ile]				0.477273	0	0	0.477273	0.00058875	0.000589735	0.53244
missense	-2	2R	17175269	T	C	FBgn0034612	CG10505-RA:p.Glu692Gly				1	0	0	1	2.28e-14	5.54e-14	0.427771
missense	-2	2R	7296742	G	A	FBgn0050026	CG30026-RB:p.Thr57Ile				0.855167	0	0	0.855167	0.000485012	0.000485272	0.633926
missense	-2	2R	7296673	G	A	FBgn0050026	CG30026-RB:p.Ser80Phe				0.910277	0.3125	0	0.754027	0.0015698	6.55e-07	0.370927
missense	-2	2R	7296541	G	A	FBgn0050026	CG30026-RB:p.Ser124Phe				0.91889	0	0	0.91889	3.8e-05	3.8e-05	0.629333
missense	-2	2R	7296715	A	G	FBgn0050026	CG30026-RB:p.Phe66Ser				0.88205	0.33333	0	0.715385	0.00365717	0.000128321	0.372197
missense	-2	3L	1315912	C	T	FBgn0035207	CG9153-RA:p.[Ala481Val]; CG9153-RB:p.[Ala481Val]				1	0	0.13043	0.934785	7.98e-15	2.52e-05	0.376281
missense	-2	3L	3330784	T	C	FBgn0035439	CG14961-RA:p.Val196Ala				1	0	0	1	2.8e-14	2.26e-14	0.7721
missense	-2	2R	12268631	A	G	FBgn0262816	CG43187-RA:p.Met138Val				1	0.43109	0.26087	0.65402	0.0050638	0.000467202	0.0620342
missense	-2	2R	7768583	A	G	FBgn0033661	CG13185-RC:p.[Val1376Ala]; CG13185-RB:p.[Val1340Ala]				0.491287	0	0	0.491287	0.0318178	0.0317815	0.198472
missense	-2	2R	7766402	G	A	FBgn0033661	CG13185-RC:p.[Thr2103Ile]; CG13185-RB:p.[Thr2067Ile]				0	0.61345	0.557577	-0.585513	0.00840162	0.013198	0.774091
missense	-2	3L	19796462	G	C	FBgn0260874	Ir76a-RE:p.[Trp642Cys]; Ir76a-RA:p.[Trp511Cys]; Ir76a-RB:p.[Trp511Cys]; Ir76a-RC:p.[Trp429Cys]				1	0	0	1	1.93e-14	1.08e-14	0.265156
missense	-2	2R	1496650	C	T	FBgn0039970	CG17508-RB:p.[Thr72Ile]; CG17508-RA:p.[Thr72Ile]				0.285863	0	0	0.285863	0.0368354	0.0367557	0.170686
missense	-2	2R	7871091	C	T	FBgn0011704	RnrS-RA:p.Gly342Glu				0.38902	0	0	0.38902	0.0324303	0.0324558	0.780867
missense	-2	3R	20569759	T	C	FBgn0004885	tok-RA:p.[Val419Ala]; tok-RB:p.[Val419Ala]				0.90063	1	1	-0.09937	0.00840655	0.00840598	0.988975
missense	-2	3R	24576582	G	A	FBgn0039596	CG10000-RA:p.Thr179Ile				0.764023	1	1	-0.235977	0.000763618	0.000765884	0.497499
missense	-2	2R	3816682	C	T	FBgn0033234	CG8791-RA:p.[Ala334Val]; CG8791-RB:p.[Ala306Val]				0.311367	0	0	0.311367	0.00133288	0.00133176	0.77821
missense	-2	2L	7687746	T	C	FBgn0040299	Myo28B1-RB:p.[Leu1606Ser]; Myo28B1-RA:p.[Leu1605Ser]; Myo28B1-RE:p.[Leu557Ser]				0.897437	0.264705	0.46904	0.530564	0.00671073	0.0281721	0.535916
missense	-2	2R	17013665	G	A	FBgn0020312	CG4050-RA:p.[Ala287Val]; CG4050-RB:p.[Ala287Val]				1	0	0	1	4.45e-14	6.89e-14	0.743306
missense	-2	2R	16156359	A	G	FBgn0034493	CG8908-RB:p.[Met1234Val]; CG8908-RA:p.[Met1194Val]				0	0.609323	0.66642	-0.637872	0.00102286	9.56e-05	0.528243
missense	-2	2R	16155868	C	T	FBgn0034493	CG8908-RB:p.[Ala1070Val]; CG8908-RA:p.[Ala1030Val]				0	0.6285	0.62107	-0.624785	0.00078332	0.00739959	0.959137
missense	-2	2L	15009197	T	C	FBgn0261882	l(2)35Bc-RA:p.[Met116Val]; l(2)35Bc-RB:p.[Met116Val]				0.450793	0.15385	0	0.373868	0.00323924	0.000273847	0.371853
missense	-2	3L	11801362	G	A	FBgn0259140	CG42255-RA:p.Ser1685Leu				0.420037	0	0	0.420037	2.56e-05	2.57e-05	0.508858
missense	-2	3L	11796781	C	G	FBgn0259140	CG42255-RA:p.Arg3125Pro				0.529517	0	0	0.529517	0.000297466	0.000297492	0.980946
missense	-2	3L	11797711	G	T	FBgn0259140	CG42255-RA:p.Ala2815Asp				0.08333	0.516483	0.36972	-0.359772	0.00833749	0.000617407	0.211964
missense	-2	X	8166765	AG	TT	FBgn0030029	CG15343-RA:p.Leu159Lys				1	0.1875	0.3125	0.75	0.000115826	0.00101656	0.749746
missense	-2	2L	7698826	A	G	FBgn0041182	TepII-RA:p.[Ile594Thr]; TepII-RB:p.[Ile594Thr]; TepII-RC:p.[Ile594Thr]; TepII-RE:p.[Ile594Thr]; TepII-RD:p.[Ile594Thr]				0.871347	0.21429	0	0.764202	0.00315074	0.00109427	0.372515
missense	-2	2L	7700264	A	G	FBgn0041182	TepII-RA:p.[Ile156Thr]; TepII-RB:p.[Ile156Thr]; TepII-RC:p.[Ile156Thr]; TepII-RE:p.[Ile156Thr]; TepII-RD:p.[Ile156Thr]				0.850693	0.174245	0.18396	0.671591	0.00184257	0.00179378	0.385076
missense	-2	2L	7695206	G	T	FBgn0041182	TepII-RA:p.[Ala1014Asp]; TepII-RB:p.[Ala993Asp]; TepII-RC:p.[Ala991Asp]; TepII-RE:p.[Ala982Asp]; TepII-RD:p.[Ala1002Asp]				0.837977	0.21329	0	0.731332	0.00654342	0.00150997	0.145484
missense	-2	2R	18372337	A	T	FBgn0034734	CG4554-RA:p.Gln450Leu				0.189037	0	0	0.189037	0.00157739	0.00158171	0.715887
missense	-2	3L	11056125	G	T	FBgn0052075	CG32075-RA:p.[Ala485Asp]; CG32075-RB:p.[Ala485Asp]				0.982457	0	0.18182	0.891547	6.05e-07	0.000127456	0.371677
missense	-2	3L	19967810	T	C	FBgn0004852	Ac76E-RA:p.[Ile1037Thr]; Ac76E-RB:p.[Ile1037Thr]				0.661047	0.17647	0.262143	0.44174	0.000544055	0.00173976	0.0610547
missense	-2	2R	8307491	G	A	FBgn0033733	CG8834-RB:p.Ser485Phe				1	0	0	1	4.05e-14	1.33e-14	0.74631
missense	-2	2R	8308169	G	C	FBgn0033733	CG8834-RA:p.Arg531Gly				0	1	1	-1	8.61e-15	1.31e-14	0.0827724
missense	-2	3L	20348719	T	G	FBgn0036975	CG5618-RA:p.Leu228Arg				0.53408	0.156565	0.225397	0.343099	0.0186552	0.045966	0.230679
missense	-2	3R	8864263	C	T	FBgn0038113	CG11668-RA:p.Ala26Val				0.355263	0	0	0.355263	0.00905433	0.00902887	0.306767
missense	-2	2L	19501487	C	A	FBgn0040268	Top3alpha-RA:p.Ser1025Tyr				0.78725	0	0	0.78725	0.000900259	0.000901236	0.359518
missense	-2	3R	13364202	GG	AA	FBgn0010926	l(3)07882-RA:p.Ala443Val				1	0	0	1	2.31e-14	2.51e-15	0.530888
missense	-2	3L	12397735	G	A	FBgn0052103	CG32103-RC:p.[Ala195Val]; CG32103-RA:p.[Ala415Val]; CG32103-RB:p.[Ala415Val]				1	0.11765	0	0.941175	1.67e-05	3.26e-15	0.371852
missense	-2	3R	26599845	C	T	FBgn0004606	zfh1-RB:p.Ala133Val				0.80196	0.40324	0.314935	0.442873	0.0235114	0.00753551	0.259932
missense	-2	2L	14322067	G	A	FBgn0261563	wb-RG:p.[Gly1912Glu]; wb-RB:p.[Gly1912Glu]; wb-RC:p.[Gly1104Glu]; wb-RD:p.[Gly1104Glu]; wb-RE:p.[Gly1104Glu]; wb-RF:p.[Gly1104Glu]				0.843577	0.475817	0.455555	0.377891	0.0286992	0.0487085	0.450456
missense	-2	2L	14287055	A	T	FBgn0261563	wb-RG:p.[Gln615Leu]; wb-RB:p.[Gln615Leu]				0	0.38682	0.5568	-0.47181	0.0226126	0.00142361	0.257282
missense	-2	3R	5946264	A	G	FBgn0037789	CG6208-RA:p.Val278Ala				1	0.5	0.226247	0.636877	0.00749464	4.36e-05	0.74594
missense	-2	2L	18491172	GA	AG	FBgn0032683	kon-RB:p.Val1394Ala				0.315017	0	0	0.315017	0.00208139	0.00209054	0.239491
missense	-2	2L	18495027	C	A	FBgn0032683	kon-RB:p.Ser304Ile				0.19104	0.644447	0.479167	-0.370767	0.0121334	0.0026734	0.171152
missense	-2	2L	3015113	T	C	FBgn0031488	CG17265-RA:p.Val492Ala				0.361903	0	0	0.361903	0.00640975	0.00639118	0.268333
missense	-2	2R	11459223	T	A	FBgn0050466	CG30466-RA:p.Leu21Gln				0.760417	0	0	0.760417	0.00629509	0.00629854	0.654341
missense	-2	3R	12976499	A	G	FBgn0038490	CG5285-RA:p.Tyr41Cys				0.933333	0	0	0.933333	0.000151798	0.000151962	0.0930236
missense	-2	3R	12976601	G	T	FBgn0038490	CG5285-RA:p.Cys75Phe				0.96154	0	0	0.96154	1.52e-05	1.52e-05	0.928113
missense	-2	2L	7958688	T	C	FBgn0085450	Snoo-RE:p.Tyr343Cys				0.69938	0	0	0.69938	0.00692549	0.00691252	0.313962
missense	-2	2L	4502843	A	G	FBgn0053196	dp-RL:p.[Ile13752Thr]; dp-RH:p.[Ile14699Thr]; dp-RG:p.[Ile15342Thr]; dp-RE:p.[Ile11683Thr]; dp-RN:p.[Ile13446Thr]; dp-RD:p.[Ile15872Thr]; dp-RF:p.[Ile15785Thr]; dp-RC:p.[Ile15991Thr]				0.4283	0	0	0.4283	0.0202026	0.0202389	0.393686
missense	-2	2L	4493525	C	T	FBgn0053196	dp-RL:p.[Gly16609Glu]; dp-RH:p.[Gly17556Glu]; dp-RG:p.[Gly18199Glu]; dp-RE:p.[Gly14540Glu]; dp-RN:p.[Gly16303Glu]; dp-RD:p.[Gly18729Glu]; dp-RF:p.[Gly18642Glu]; dp-RC:p.[Gly18848Glu]				0.44809	0	0	0.44809	4.72e-05	4.72e-05	0.868107
missense	-2	2L	4498614	C	T	FBgn0053196	dp-RL:p.[Gly15053Arg]; dp-RH:p.[Gly16000Arg]; dp-RG:p.[Gly16643Arg]; dp-RE:p.[Gly12984Arg]; dp-RN:p.[Gly14747Arg]; dp-RD:p.[Gly17173Arg]; dp-RF:p.[Gly17086Arg]; dp-RC:p.[Gly17292Arg]				0.492097	0	0	0.492097	0.000338538	0.000338345	0.801764
missense	-2	2L	4499360	T	C	FBgn0053196	dp-RL:p.[Glu14804Gly]; dp-RH:p.[Glu15751Gly]; dp-RG:p.[Glu16394Gly]; dp-RE:p.[Glu12735Gly]; dp-RN:p.[Glu14498Gly]; dp-RD:p.[Glu16924Gly]; dp-RF:p.[Glu16837Gly]; dp-RC:p.[Glu17043Gly]				0.506763	0	0	0.506763	0.00691503	0.00691791	0.748607
missense	-2	2L	4492874	T	A	FBgn0053196	dp-RL:p.[Gln16826Leu]; dp-RH:p.[Gln17773Leu]; dp-RG:p.[Gln18416Leu]; dp-RE:p.[Gln14757Leu]; dp-RN:p.[Gln16520Leu]; dp-RD:p.[Gln18946Leu]; dp-RF:p.[Gln18859Leu]; dp-RC:p.[Gln19065Leu]				0.481853	0	0	0.481853	0.000199142	0.000199208	0.915873
missense	-2	2L	4510335	CT	AA	FBgn0053196	dp-RK:p.[Gln13767Leu]; dp-RH:p.[Gln12475Leu]; dp-RG:p.[Gln13118Leu]; dp-RE:p.[Gln9459Leu]; dp-RN:p.[Gln11222Leu]; dp-RD:p.[Gln13648Leu]; dp-RF:p.[Gln13561Leu]; dp-RC:p.[Gln13767Leu]				0.54924	0	0	0.54924	0.00169783	0.00169739	0.886925
missense	-2	2L	4561232	A	G	FBgn0053196	dp-RJ:p.[Val874Ala]; dp-RI:p.[Val874Ala]; dp-RK:p.[Val874Ala]; dp-RL:p.[Val874Ala]; dp-RH:p.[Val874Ala]; dp-RG:p.[Val874Ala]; dp-RE:p.[Val874Ala]; dp-RD:p.[Val755Ala]; dp-RF:p.[Val874Ala]; dp-RC:p.[Val874Ala]				0.407283	0	0	0.407283	0.014893	0.0148999	0.855007
missense	-2	2L	4556354	G	A	FBgn0053196	dp-RJ:p.[Ala2500Val]; dp-RI:p.[Ala2500Val]; dp-RK:p.[Ala2500Val]; dp-RL:p.[Ala2500Val]; dp-RH:p.[Ala2500Val]; dp-RG:p.[Ala2500Val]; dp-RE:p.[Ala2500Val]; dp-RD:p.[Ala2381Val]; dp-RF:p.[Ala2500Val]; dp-RC:p.[Ala2500Val]				0.558057	0	0	0.558057	1.17e-05	1.17e-05	0.466618
missense	-2	3R	20691540	C	T	FBgn0013949	Ela-RA:p.[Ser150Leu]; Ela-RB:p.[Ser130Leu]				0	0.544037	0.63492	-0.589478	0.00186168	0.0256133	0.668725
missense	-2	3L	13991750	G	A	FBgn0036396	CG17359-RA:p.Ser178Phe				0.838097	0	0	0.838097	0.000577821	0.000578419	0.428658
missense	-2	3R	23761850	T	A	FBgn0039559	Mes-4-RA:p.Gln510Leu				0	0.357663	0.448277	-0.40297	0.046983	0.023999	0.63895
missense	-2	2L	4865562	T	C	FBgn0051660	pog-RB:p.[Leu87Ser]; pog-RE:p.[Leu87Ser]; pog-RC:p.[Leu87Ser]; pog-RD:p.[Leu87Ser]				0	0.246633	0.47393	-0.360282	0.0384529	0.00158151	0.0900968
missense	-2	3L	19997154	C	T	FBgn0036929	CG7668-RA:p.[Thr276Ile]; CG7668-RB:p.[Thr260Ile]				1	0.16667	0.330315	0.751507	7e-05	0.00214625	0.254395
missense	-2	3R	17710138	C	T	FBgn0038914	fit-RA:p.Val6Met				0.522987	0	0	0.522987	0.00464109	0.00463809	0.773158
missense	-2	3R	9664534	C	A	FBgn0051495	CG31495-RA:p.Gly330Trp				0.732537	0	0	0.732537	0.00198485	0.00198458	0.898388
missense	-2	3R	24541817	A	C	FBgn0027655	htt-RA:p.Asp1990Ala				0.821893	0	0	0.821893	0.000474718	0.000474973	0.511446
missense	-2	3R	20071776	T	C	FBgn0043884	mask-RA:p.[Val3401Ala]; mask-RB:p.[Val3401Ala]; mask-RC:p.[Val3410Ala]				0.682947	0.405845	0	0.480024	0.0476291	0.000135566	0.122463
missense	-2	2L	299382	G	T	FBgn0020622	Pi3K21B-RA:p.Arg117Leu				0.583333	0.15789	0	0.504388	0.0129932	0.00664125	0.374627
missense	-2	3R	20722513	C	T	FBgn0039244	CG11069-RA:p.Thr415Ile				1	0.49781	0.55556	0.473315	0.00275746	0.0117504	0.194227
missense	-2	2L	13975515	A	G	FBgn0259896	nimC1-RA:p.Val193Ala				0	0.727273	0.611903	-0.669588	0.00759272	0.0332607	0.656925
missense	-2	2R	18108282	T	C	FBgn0050277	Oatp58Da-RA:p.Arg30Gly				0	0.71282	1	-0.85641	0.00787645	1.67e-14	0.11824
missense	-2	2L	2978160	A	G	FBgn0031484	CG3165-RA:p.Glu288Gly				0.71111	0	0	0.71111	0.014166	0.0141678	0.92544
missense	-2	2L	2977850	A	T	FBgn0031484	CG3165-RA:p.Asn185Tyr				0.823333	0	0	0.823333	9.15e-05	9.15e-05	0.973708
missense	-2	3R	4869206	G	A	FBgn0010222	Nmdmc-RA:p.[Ala51Val]; Nmdmc-RB:p.[Ala57Val]				0.59496	0	0	0.59496	0.00107384	0.00107368	0.942496
missense	-2	2L	10237613	A	G	FBgn0051720	CG31720-RC:p.[Ile78Thr]; CG31720-RD:p.[Ile78Thr]				0.508823	0.19048	0	0.413583	0.00799495	0.00140995	0.372556
missense	-2	3L	711108	G	T	FBgn0035159	CG13896-RA:p.[Ala156Asp]; CG13896-RB:p.[Ala156Asp]				1	0.262513	0.13636	0.800563	0.00051169	3e-05	0.0630467
missense	-2	3R	10488864	A	G	FBgn0025808	Rad17-RA:p.Val3Ala				0	0.46111	0.46309	-0.4621	0.0332134	0.0188102	0.991841
missense	-2	3R	8817983	G	A	FBgn0041710	yellow-f-RA:p.Ala211Val				0.56674	0	0.23529	0.449095	0.000316286	0.0061223	0.374505
missense	-2	2L	9953934	C	T	FBgn0032168	CG13126-RA:p.Val54Met				0.968253	0	0.21591	0.860298	6.87e-06	0.000528205	0.127279
missense	-2	3L	11703802	G	A	FBgn0036198	crim-RA:p.Thr150Ile				0.948717	0.321425	0	0.788004	0.00364783	4.95e-05	0.121483
missense	-2	2R	19256740	C	T	FBgn0034853	CG13550-RA:p.Ser686Leu				1	0.58536	0.701923	0.356358	0.016121	0.00154581	0.351247
missense	-2	2L	6764547	C	A	FBgn0031857	CG11321-RB:p.Ser1655Ile				0.698303	0	0.27273	0.561938	5.72e-06	0.00289578	0.374595
missense	-2	2L	6767425	AG	GA	FBgn0031857	CG11321-RB:p.[Leu817Ser]; CG11321-RC:p.[Leu764Ser]				0.738863	0.225727	0.16	0.546	0.00816776	0.0011363	0.160075
missense	-2	3R	20442992	C	T	FBgn0263490	mld-RF:p.[Ser624Leu]; mld-RA:p.[Ser624Leu]; mld-RC:p.[Ser624Leu]; mld-RE:p.[Ser624Leu]; mld-RD:p.[Ser624Leu]				0	0.705247	0.742223	-0.723735	0.00300164	0.00497412	0.840819
missense	-2	3R	20442776	T	C	FBgn0263490	mld-RF:p.[Leu552Ser]; mld-RA:p.[Leu552Ser]; mld-RC:p.[Leu552Ser]; mld-RE:p.[Leu552Ser]; mld-RD:p.[Leu552Ser]				0.363447	0	0.15385	0.286522	0.00612443	0.0218541	0.371083
missense	-2	3R	20442908	T	C	FBgn0263490	mld-RF:p.[Ile596Thr]; mld-RA:p.[Ile596Thr]; mld-RC:p.[Ile596Thr]; mld-RE:p.[Ile596Thr]; mld-RD:p.[Ile596Thr]				0	0.710447	0.650433	-0.68044	0.000154473	0.0366062	0.795341
missense	-2	3R	20417031	C	T	FBgn0263490	mld-RF:p.[Ala180Val]; mld-RA:p.[Ala180Val]; mld-RC:p.[Ala180Val]; mld-RE:p.[Ala180Val]; mld-RD:p.[Ala180Val]				0.710103	0	0.16667	0.626768	0.0343127	0.0477339	0.369036
missense	-2	2R	7753092	G	A	FBgn0033659	Damm-RA:p.Ala201Val				0.86652	0.507937	0.30383	0.460637	0.0060007	0.00174301	0.101221
missense	-2	3L	5796428	C	A	FBgn0015806	CG42272-RC:p.Pro99His				0.64058	0	0	0.64058	0.000636719	0.000637873	0.158124
missense	-2	3R	20049754	A	G	FBgn0039169	Spps-RA:p.Val875Ala				0.391273	0	0	0.391273	0.0252316	0.0252092	0.669894
missense	-2	3R	25049638	A	T	FBgn0039654	Brd8-RA:p.Gln116Leu				1	0.4	0.09524	0.75238	0.00288157	6.89e-06	0.498646
missense	-2	3L	20361583	A	G	FBgn0001259	in-RA:p.Arg390Gly				0	0.96154	0.854567	-0.908053	1.51e-05	0.000120033	0.196182
missense	-2	3L	17506545	C	T	FBgn0036733	U4-U6-60K-RA:p.Val113Met				0.596603	0	0	0.596603	0.00221595	0.00221306	0.559399
missense	-2	2R	9144347	G	A	FBgn0033820	CG4716-RB:p.[Gly54Arg]; CG4716-RA:p.[Gly54Arg]				1	0.371283	0.27381	0.677453	0.0320603	0.00110108	0.434623
missense	-2	3L	17826678	G	A	FBgn0001134	CG32188-RA:p.Ala6Val				0	0.571717	0.86995	-0.720833	0.045071	0.000186121	0.227262
missense	-2	3L	15497891	A	G	FBgn0026738	CG7857-RA:p.Ile8Thr				1	0.391537	0.306957	0.650753	0.00983645	0.000222037	0.583968
missense	-2	3L	15497594	C	T	FBgn0026738	CG7857-RA:p.Gly107Glu				1	0.29762	0.245345	0.728517	0.00967477	0.00115377	0.501707
missense	-2	3R	7250713	C	A	FBgn0037897	CG5270-RB:p.Ala825Asp				0.357777	0.13333	0	0.291112	0.00694337	0.00104839	0.373703
missense	-2	2R	16164128	A	G	FBgn0034496	CG9143-RA:p.Leu676Ser				1	0.63636	0.65035	0.356645	0.0205645	0.0239442	0.134091
missense	-2	3L	9581058	T	C	FBgn0261555	CG42673-RC:p.Val323Ala				0.95	0.18182	0	0.85909	0.000347606	4.53e-05	0.373726
missense	-2	3L	11684337	TT	GC	FBgn0036192	pallidin-RB:p.[Glu13Gly]; pallidin-RD:p.[Glu13Gly]				0.949493	0.52489	0.29247	0.540813	0.0320701	0.00623149	0.526156
missense	-2	3L	11990180	G	T	FBgn0026432	Grip163-RA:p.Ser324Tyr				0.79941	0.36364	0	0.61759	0.00542299	6.67e-06	0.373417
missense	-2	3L	5579823	A	C	FBgn0035617	l(3)psg2-RA:p.His888Pro				0.908047	0.470977	0.30822	0.518448	0.0140666	0.0120641	0.2267
missense	-2	X	8317979	A	G	FBgn0261793	Trf2-RE:p.[Glu77Gly]; Trf2-RF:p.[Glu77Gly]				0.423077	0	0	0.423077	0.0119142	0.0118998	0.565605
missense	-2	3L	15575694	T	C	FBgn0036514	CG12301-RA:p.Ile549Thr				0	0.564553	0.564653	-0.564603	0.0330186	0.000770071	0.999826
missense	-2	2L	15611525	G	A	FBgn0028950	CG15255-RA:p.Ala54Val				0.29889	0	0	0.29889	0.0220343	0.0219743	0.0985923
missense	-2	2L	1882929	G	A	FBgn0031373	CG15358-RA:p.Ala193Val				0.56302	0.125	0	0.50052	0.00235702	0.000896087	0.3708
missense	-2	3L	1342052	A	G	FBgn0035213	CG2199-RA:p.[Val4Ala]; CG2199-RB:p.[Val13Ala]				1	0	0	1	2.07e-14	6.69e-15	0.630467
missense	-2	3L	1340312	C	T	FBgn0035213	CG2199-RA:p.[Gly562Glu]; CG2199-RB:p.[Gly571Glu]				0.670567	0	0	0.670567	0.00556319	0.00557214	0.329161
missense	-2	3L	1340384	G	A	FBgn0035213	CG2199-RA:p.[Ala538Val]; CG2199-RB:p.[Ala547Val]				0.62115	0	0	0.62115	0.0103528	0.0103455	0.526328
missense	-2	2L	12020243	A	T	FBgn0032395	CG6734-RA:p.Tyr167Asn				0.508333	0	0	0.508333	0.0136441	0.0136326	0.632111
missense	-2	3R	16956602	A	G	FBgn0038860	CG10825-RA:p.[Tyr146Cys]; CG10825-RB:p.[Tyr91Cys]				0.471677	1	1	-0.528323	5.3e-06	5.29e-06	0.33044
missense	-2	3R	16957631	G	C	FBgn0038860	CG10825-RA:p.[Arg489Pro]; CG10825-RB:p.[Arg434Pro]; CG10825-RC:p.[Arg199Pro]				0.48328	0	0	0.48328	0.00536625	0.0053785	0.324141
missense	-2	3R	16956968	G	T	FBgn0038860	CG10825-RA:p.[Arg268Leu]; CG10825-RB:p.[Arg213Leu]				0.641417	0	0	0.641417	0.00104788	0.00104707	0.687046
missense	-2	3R	16957841	C	A	FBgn0038860	CG10825-RA:p.[Ala559Asp]; CG10825-RB:p.[Ala504Asp]; CG10825-RC:p.[Ala269Asp]				0.5	0	0	0.5	0.00504319	0.00504418	0.92728
missense	-2	2L	10184699	G	A	FBgn0028675	Sur-RB:p.Ala1881Val				1	0.375103	0.33333	0.645783	0.000253648	0.00132608	0.0969187
missense	-2	3R	27080083	C	G	FBgn0039836	CG1750-RB:p.[Gly100Arg]; CG1750-RA:p.[Gly147Arg]				0.590587	0	0	0.590587	0.010107	0.0101109	0.828838
missense	-2	2R	17032761	G	C	FBgn0021872	Xbp1-RC:p.Arg439Pro				0	0.87619	0.916087	-0.896138	0.000220656	2.72e-05	0.651109
missense	-2	4	752258	C	T	FBgn0005666	bt-RC:p.[Thr447Ile]; bt-RF:p.[Thr662Ile]; bt-RG:p.[Thr387Ile]				0.837277	0.44231	0	0.616122	0.0415866	0.00126487	0.122794
missense	-2	3L	11793350	A	C	FBgn0036208	CG10361-RA:p.Ile49Ser				0.31845	0	0	0.31845	0.000105882	0.00010617	0.436788
missense	-2	2L	16860590	A	G	FBgn0032615	CG6012-RA:p.Ile137Thr				0.26818	1	0.84689	-0.655265	0.000860034	0.00968927	0.239935
missense	-2	2L	16861304	C	T	FBgn0032615	CG6012-RA:p.Gly39Glu				0.718423	0	0.201865	0.617491	3.21e-06	0.00169223	0.149017
missense	-2	2L	14108611	G	T	FBgn0028526	CG15293-RA:p.Ser196Tyr				0.79968	0	0	0.79968	0.00927588	0.00926102	0.294888
missense	-2	2L	14108926	C	T	FBgn0028526	CG15293-RA:p.Gly91Glu				0.88889	0	0	0.88889	0.00133496	0.00133395	0.340268
missense	-2	3L	14018271	A	G	FBgn0052133	ptip-RA:p.Val1055Ala				0.842103	0.08	0	0.802103	0.000650671	0.000468667	0.373697
missense	-2	3R	8861315	C	T	FBgn0003308	ry-RA:p.Ala673Val				0.402023	0	0	0.402023	0.00343184	0.00342295	0.425628
missense	-2	3R	8861042	C	T	FBgn0003308	ry-RA:p.Ala582Val				0.66998	0.18182	0.25909	0.449525	0.000959562	0.00740514	0.368846
missense	-2	2L	13280323	T	C	FBgn0032497	CG6108-RA:p.Val983Ala				0	0.471893	0.446513	-0.459203	0.0185852	0.00294584	0.86437
missense	-2	3R	20641290	G	C	FBgn0027617	CG5808-RA:p.Pro462Arg				1	0.24091	0	0.879545	0.000657626	6.96e-14	0.139576
missense	-2	2R	8241774	T	C	FBgn0050047	CG30047-RA:p.Ile597Thr				1	0	0	1	1.69e-14	8.41e-15	0.236596
missense	-2	X	18682980	T	A	FBgn0004462	Pk17E-RA:p.[Leu39Gln]; Pk17E-RC:p.[Leu39Gln]				0.219337	0	0	0.219337	0.0196234	0.0196777	0.424823
missense	-2	3R	4812676	G	T	FBgn0027503	CG11970-RA:p.Arg557Leu				1	0	0.15789	0.921055	3.76e-14	5.58e-05	0.370816
missense	-2	2R	16170706	C	A	FBgn0034498	CG16868-RA:p.Ser1100Ile				1	0	0	1	1.36e-14	5.92e-15	0.393245
missense	-2	2R	16173609	G	C	FBgn0034498	CG16868-RA:p.Pro190Arg				1	0	0	1	7.53e-14	1.33e-13	0.450865
missense	-2	2L	20930285	A	G	FBgn0032908	CG9270-RC:p.Ile1097Thr				0.830483	0.342245	0	0.659361	0.015322	0.000642804	0.131816
missense	-2	2L	20932433	ACC	TTT	FBgn0032908	CG9270-RC:p.Gly399Lys				0	0.72835	0.689793	-0.709072	0.00383371	0.00822472	0.847557
missense	-2	2L	18357240	A	T	FBgn0000636	Acp36DE-RA:p.Leu575Gln				0.231653	0	0	0.231653	0.00691012	0.00692693	0.422238
missense	-2	2L	18356628	C	T	FBgn0000636	Acp36DE-RA:p.Gly779Glu				0.22561	0	0	0.22561	0.000514474	0.000516922	0.292686
missense	-2	3L	2566657	A	T	FBgn0010909	msn-RE:p.[Leu370Gln]; msn-RC:p.[Leu370Gln]; msn-RD:p.[Leu370Gln]; msn-RB:p.[Leu370Gln]; msn-RA:p.[Leu370Gln]				0.936507	0	0	0.936507	0.000124267	0.00012432	0.771201
missense	-2	3R	25067135	A	T	FBgn0051445	CG31445-RA:p.Tyr733Asn				1	0.14286	0.16667	0.845235	3.63e-05	6.94e-05	0.919264
missense	-2	3L	12810460	T	C	FBgn0260965	CG42588-RA:p.[Leu504Ser]; CG42588-RB:p.[Leu504Ser]				0	0.450503	0.564393	-0.507448	0.0333206	0.0180917	0.605665
missense	-2	2R	14163338	A	G	FBgn0003022	Ote-RA:p.Leu416Ser				1	0	0	1	8.78e-14	5.6e-14	0.609566
missense	-2	2L	10742284	A	T	FBgn0032296	CG6729-RA:p.Leu477Gln				1	0.63416	0.58069	0.392575	0.0197268	0.0358184	0.323814
missense	-2	3L	15848861	G	A	FBgn0036542	CG12486-RA:p.Ala206Val				1	0.42157	0.650433	0.463998	0.0226971	0.034939	0.180968
missense	-2	3L	14989507	T	C	FBgn0036461	CG10006-RB:p.Val230Ala				0	0.646467	0.414167	-0.530317	0.00217326	0.00132321	0.0928816
missense	-2	2R	19262839	A	G	FBgn0034854	CG3493-RA:p.Val397Ala				0	0.41238	0.21991	-0.316145	0.0129288	0.00674486	0.142444
missense	-2	2R	19262857	A	G	FBgn0034854	CG3493-RA:p.Ile391Thr				0	0.337437	0.203597	-0.270517	0.00742322	0.00455962	0.153175
missense	-2	2R	2774318	G	A	FBgn0033115	Spn42De-RA:p.Gly103Arg				0	0.593163	0.238033	-0.415598	0.0257007	0.0109959	0.118589
missense	-2	2L	9420816	T	C	FBgn0032116	CG3759-RA:p.[Val49Ala]; CG3759-RB:p.[Val49Ala]; CG3759-RC:p.[Val49Ala]				0.980393	0	0.32828	0.816253	9.53e-07	0.0104495	0.259249
missense	-2	2R	10504473	C	T	FBgn0026427	Su(var)2-HP2-RB:p.[Gly234Glu]; Su(var)2-HP2-RA:p.[Gly234Glu]				0	0.398097	0.129987	-0.264042	0.0498646	0.000508283	0.135768
missense	-2	2R	10500896	C	A	FBgn0026427	Su(var)2-HP2-RA:p.Ser1363Ile				0.988507	0	0	0.988507	1.12e-07	1.12e-07	0.272938
missense	-2	2R	10500977	G	A	FBgn0026427	Su(var)2-HP2-RA:p.Ser1336Leu				0.982457	0	0	0.982457	5.93e-07	5.92e-07	0.892873
missense	-2	2R	10501631	A	G	FBgn0026427	Su(var)2-HP2-RA:p.Leu1118Ser				0.9375	0	0	0.9375	0.00011451	0.000114494	0.888488
missense	-2	2R	7156310	G	T	FBgn0033603	Cpr47Ef-RD:p.[Pro368His]; Cpr47Ef-RC:p.[Pro368His]				1	0	0	1	2.38e-14	2.03e-16	0.770985
missense	-2	3L	9714145	T	A	FBgn0261530	nbs-RE:p.[Asn653Tyr]; nbs-RD:p.[Asn651Tyr]				0.927427	0	0	0.927427	4.09e-05	4.09e-05	0.968594
missense	-2	2R	16765740	T	C	FBgn0050295	Ipk1-RA:p.Ile593Thr				1	0	0.16	0.92	5.32e-15	6.06e-05	0.375974
missense	-2	2R	16765148	GG	AA	FBgn0050295	Ipk1-RA:p.[Gly396Asn]; Ipk1-RB:p.[Gly396Asn]				1	0	0	1	2.9e-14	4.45e-15	0.151409
missense	-2	3R	10081984	T	G	FBgn0027083	CG43179-RA:p.Leu37Trp				0.444297	1	0.844443	-0.477925	0.00510005	0.0389006	0.146651
missense	-2	2R	14509594	G	A	FBgn0034366	CG5335-RA:p.Val61Met				0	0.445287	0.61258	-0.528933	0.00303355	0.000297212	0.126207
missense	-2	3L	1791692	G	A	FBgn0250789	dlt-RA:p.Ser575Leu				0.757837	0	0	0.757837	0.00419438	0.00419067	0.577725
missense	-2	3L	1792142	G	A	FBgn0250789	dlt-RA:p.Ser425Leu				1	0	0.31731	0.841345	3.84e-14	0.00220011	0.133967
missense	-2	3L	1789790	G	T	FBgn0250789	dlt-RA:p.Ala1209Asp				0.67629	0	0	0.67629	0.00296927	0.00296706	0.641835
missense	-2	2R	13011081	T	A	FBgn0034195	Spn53F-RB:p.Asn218Tyr				1	0.275645	0.449165	0.637595	0.00184834	0.00947324	0.569143
missense	-2	2R	13010990	G	T	FBgn0034195	Spn53F-RB:p.Ala248Asp				1	0.2	0.329317	0.735342	0.000149224	0.00442463	0.120595
missense	-2	3R	9535103	A	C	FBgn0051469	CG31469-RA:p.Ile129Ser				0.548647	0.948863	0.891667	-0.371618	0.000128293	0.00425121	0.424361
missense	-2	2L	6718123	A	G	FBgn0031851	CG11188-RA:p.Glu138Gly				0	0.81023	0.73042	-0.770325	0.000580312	0.0031325	0.601477
missense	-2	3R	1617867	A	G	FBgn0037377	CG1218-RA:p.Glu58Gly				0	0.61994	0.661943	-0.640942	0.00379749	0.00985198	0.821817
missense	-2	3R	11039792	T	A	FBgn0038302	CG4210-RA:p.Leu13Gln				0.338223	0	0.21429	0.231078	0.00255019	0.038038	0.372374
missense	-2	2R	3533140	A	C	FBgn0263077	CG43340-RO:p.[Tyr2206Ser]; CG43340-RN:p.[Tyr2206Ser]; CG43340-RM:p.[Tyr2206Ser]				0.225	0	0	0.225	0.0408758	0.0409808	0.584846
missense	-2	2R	3528682	C	T	FBgn0263077	CG43340-RO:p.[Ser720Leu]; CG43340-RN:p.[Ser720Leu]; CG43340-RM:p.[Ser720Leu]				0.175803	0	0	0.175803	0.00154189	0.00153423	0.517662
missense	-2	2R	3528730	C	A	FBgn0263077	CG43340-RO:p.[Pro736His]; CG43340-RN:p.[Pro736His]; CG43340-RM:p.[Pro736His]				0.775003	0.22065	0.14286	0.593248	0.00261947	0.000647022	0.31978
missense	-2	2R	3528808	A	G	FBgn0263077	CG43340-RO:p.[Glu762Gly]; CG43340-RN:p.[Glu762Gly]; CG43340-RM:p.[Glu762Gly]				0.294687	0	0	0.294687	0.00291088	0.00292292	0.148309
missense	-2	2L	16916193	GT	AC	FBgn0261671	tweek-RF:p.[Val4973Thr]; tweek-RI:p.[Val4953Thr]; tweek-RH:p.[Val4994Thr]; tweek-RG:p.[Val4974Thr]				0.82401	0.5	0.30464	0.42169	0.0277087	0.016921	0.501926
missense	-2	3L	14673625	T	C	FBgn0259175	ome-RE:p.Ile50Thr				0.332773	0.16667	0	0.249438	0.0397753	0.0107867	0.373839
missense	-2	2R	11121568	G	A	FBgn0259878	Fs-RA:p.Thr516Ile				1	0	0	1	6.14e-14	1.36e-13	0.66248
missense	-2	2L	3703743	T	A	FBgn0031564	CG2816-RB:p.Tyr5Asn				0.8798	0.15	0.33333	0.638135	0.000553169	0.00399601	0.64256
missense	-2	2R	12355740	G	T	FBgn0261293	CheB53b-RA:p.Trp9Cys				1	0	0	1	1.2e-14	1.37e-16	0.860714
missense	-2	3L	1291433	T	A	FBgn0052333	CG32333-RA:p.Leu600Gln				1	0	0	1	4.79e-15	7e-15	0.615641
missense	-2	3L	1294116	C	T	FBgn0052333	CG32333-RA:p.Ala1434Val				0	1	0.884057	-0.942028	9.3e-14	0.00158825	0.374711
missense	-2	3R	26870778	G	A	FBgn0010015	CG33920-RA:p.Ser17Leu				0.58971	0	0	0.58971	0.00390238	0.00390231	0.981516
missense	-2	2R	1131032	C	T	FBgn0053554	Nipped-A-RA:p.Gly226Glu				0.933333	0	0	0.933333	1.7e-05	1.7e-05	0.428139
missense	-2	3L	3484360	GG	TT	FBgn0259224	CG43074-RA:p.Pro39Asn				0.5	0.21429	0	0.392855	0.0231611	0.00650306	0.376222
missense	-2	2L	8305971	C	T	FBgn0032014	CG7840-RA:p.Ala96Val				1	0	0.15	0.925	3.13e-14	9.86e-05	0.156342
missense	-2	3L	13920904	A	T	FBgn0036386	CG8833-RA:p.Leu349Gln				0	0.808377	0.507037	-0.657707	0.000343668	0.00560205	0.0626385
missense	-2	3L	19869027	G	A	FBgn0036913	CG8334-RA:p.Gly547Arg				0.295833	0	0	0.295833	0.00850064	0.00852699	0.358065
missense	-2	2L	1147875	C	T	FBgn0031308	CG4749-RA:p.Ala4Val				0.794993	0.13636	0	0.726813	0.000158253	1.14e-05	0.372744
missense	-2	2L	10383310	C	G	FBgn0032235	CG5096-RA:p.Arg138Gly				0.810523	0.395835	0	0.612606	0.022238	3.84e-05	0.143004
missense	-2	3R	1623440	C	T	FBgn0037379	CG10979-RA:p.Ala735Val				0	0.615437	0.524917	-0.570177	0.0122868	0.00287332	0.608149
missense	-2	2L	6745508	A	G	FBgn0031855	CG31910-RA:p.Ile12Thr				1	0	0.299105	0.850448	8.75e-14	0.00131151	0.116491
missense	-2	2L	6745476	T	A	FBgn0031855	CG31910-RA:p.Asn23Tyr				0.748687	0	0.35909	0.569142	0.000356127	0.021547	0.120513
missense	-2	2L	6754858	C	T	FBgn0031855	CG11221-RA:p.Ser311Phe				0.78027	0	0.33937	0.610585	5.81e-05	0.0110885	0.122861
missense	-2	2R	2506607	C	T	FBgn0086655	jing-RI:p.[Ala1695Val]; jing-RG:p.[Ala1533Val]; jing-RD:p.[Ala1437Val]; jing-RH:p.[Ala1437Val]				0.814167	0	0	0.814167	2.62e-05	2.62e-05	1
missense	-2	3L	19646007	T	C	FBgn0036899	tey-RB:p.[Glu459Gly]; tey-RA:p.[Glu459Gly]				0.369997	0	0	0.369997	0.0403795	0.0405247	0.0860666
missense	-2	2R	17715760	G	A	FBgn0034662	CG13492-RD:p.Thr578Ile				1	0	0	1	3.69e-14	1.56e-14	0.694367
missense	-2	2R	17712142	G	T	FBgn0034662	CG13492-RD:p.Ser1760Tyr				0.1125	0.862747	0.854617	-0.746182	0.00520883	0.000272999	0.957107
missense	-2	2R	17710971	GG	AT	FBgn0034662	CG13492-RD:p.Ala2150Asp				0.837863	0	0	0.837863	0.000103071	0.000103208	0.245595
missense	-2	2L	14743487	A	T	FBgn0085195	CG34166-RA:p.[Asn40Tyr]; CG34166-RB:p.[Asn40Tyr]				0.610823	0.15	0.2	0.435823	0.0021734	0.00395134	0.852769
missense	-2	3L	15300251	T	A	FBgn0036493	CG7255-RF:p.[Tyr146Asn]; CG7255-RH:p.[Tyr146Asn]; CG7255-RE:p.[Tyr146Asn]; CG7255-RG:p.[Tyr146Asn]				0.972777	0.482327	0.49654	0.483343	0.00651708	0.00116764	0.901395
missense	-2	3L	15303371	C	A	FBgn0036493	CG7255-RF:p.[Ala1025Asp]; CG7255-RH:p.[Ala1025Asp]				0.681833	0	0.352275	0.505696	0.00116501	0.0447604	0.148459
missense	-2	2R	9102763	G	T	FBgn0033808	CG4627-RA:p.Trp97Leu				0.890747	0.275337	0.42584	0.540158	0.00306422	0.0262067	0.964723
missense	-2	2R	13977903	G	A	FBgn0085415	CG34386-RC:p.Gly152Glu				1	0	0.211395	0.894303	4.87e-15	0.000278195	0.121053
missense	-2	3R	10185232	A	G	FBgn0024321	CG31320-RA:p.Ile543Thr				0.11765	0.90909	0.63801	-0.6559	0.000926082	0.0184187	0.198294
missense	-2	3L	16093874	GG	AA	FBgn0036569	CG5414-RB:p.Gly138Asn				0.322427	0	0	0.322427	0.0200925	0.0201135	0.776754
missense	-2	2L	400092	T	C	FBgn0031251	CG4213-RA:p.Glu462Gly				0.24624	0	0	0.24624	0.0195721	0.0195816	0.911097
missense	-2	2L	537985	T	C	FBgn0003963	ush-RA:p.Val577Ala				1	0.509615	0.349067	0.570659	0.0435497	0.00842806	0.973721
missense	-2	3L	13988161	C	A	FBgn0250848	26-29-p-RA:p.Ala107Asp				0.85038	0	0	0.85038	0.000711445	0.000712652	0.0636114
missense	-2	3L	11818477	GG	AA	FBgn0052095	CG32095-RA:p.Thr70Ile				0	0.683333	0.42929	-0.556312	0.00182517	0.00227464	0.0855888
missense	-2	2L	18969422	C	T	FBgn0032728	Tango6-RA:p.Ser89Leu				0.35873	0	0.172695	0.272382	0.00379946	0.0427252	0.119013
missense	-2	2L	8564099	C	T	FBgn0011259	Sema-1a-RF:p.[Ala14Val]; Sema-1a-RD:p.[Ala14Val]; Sema-1a-RE:p.[Ala14Val]; Sema-1a-RA:p.[Ala14Val]				1	0.805553	0.576883	0.308782	0.00219047	0.0138272	0.0949823
missense	-2	X	1957298	G	T	FBgn0025626	CG4281-RA:p.Ala539Asp				1	0	0	1	4.05e-14	1.39e-13	0.524533
missense	-2	3L	840904	G	C	FBgn0035166	CG13902-RB:p.Cys120Trp				0.61012	0	0	0.61012	9.3e-05	9.31e-05	0.461941
missense	-2	2L	8448769	C	T	FBgn0027780	U26-RA:p.Val199Met				0	0.429793	0.270237	-0.350015	0.00401631	0.0276011	0.212884
missense	-2	2R	8446382	C	A	FBgn0011592	fra-RA:p.[Pro588His]; fra-RB:p.[Pro437His]				0.408187	0	0	0.408187	0.0499804	0.0499212	0.165807
missense	-2	X	3857112	A	T	FBgn0029688	lva-RC:p.Leu494Gln				0.977777	0	0	0.977777	1.65e-06	1.65e-06	0.669701
missense	-2	2R	12675844	C	A	FBgn0034158	CG5522-RC:p.[Pro25His]; CG5522-RD:p.[Pro25His]; CG5522-RF:p.[Pro25His]; CG5522-RA:p.[Pro25His]; CG5522-RB:p.[Pro25His]; CG5522-RE:p.[Pro25His]				0	0.210013	0.2596	-0.234807	0.0270665	0.000644506	0.498871
missense	-2	2R	16717772	A	T	FBgn0011674	sktl-RA:p.Leu35Gln				0	0.266453	0.336943	-0.301698	0.00137305	0.0148881	0.473079
missense	-2	2L	8428933	T	C	FBgn0027932	Akap200-RD:p.[Ile633Thr]; Akap200-RA:p.[Ile549Thr]				0.86922	0.66667	0.33333	0.36922	0.0455291	0.0030345	0.678077
missense	-2	2L	8427504	T	C	FBgn0027932	Akap200-RB:p.[Val177Ala]; Akap200-RC:p.[Val177Ala]; Akap200-RD:p.[Val177Ala]; Akap200-RA:p.[Val177Ala]				0.83827	0.346155	0.255197	0.537594	0.0235388	0.00229904	0.893202
missense	-2	3L	6564713	T	C	FBgn0042185	CG32397-RB:p.[Tyr191Cys]; CG32397-RC:p.[Tyr191Cys]; CG32397-RD:p.[Tyr191Cys]				0.942613	0.28571	0.45202	0.573748	0.00105034	0.0325619	0.115274
missense	-2	3L	6564908	A	G	FBgn0042185	CG32397-RB:p.[Leu126Ser]; CG32397-RC:p.[Leu126Ser]; CG32397-RD:p.[Leu126Ser]				0.972223	0.579773	0.626667	0.369003	0.0222905	0.0237935	0.754257
missense	-2	3L	6580425	G	A	FBgn0042185	CG18769-RG:p.Val126Met				0	0.350793	0.160533	-0.255663	0.00402296	0.0257194	0.0640903
missense	-2	2L	22432812	T	C	FBgn0040009	CG17490-RE:p.[Val590Ala]; CG17490-RC:p.[Val44Ala]; CG17490-RA:p.[Val13Ala]; CG17490-RD:p.[Val13Ala]				0.918803	0	0.47619	0.680708	4.47e-05	0.0101683	0.373329
missense	-2	X	12524029	C	T	FBgn0030411	CG2540-RA:p.Ser13Phe				1	0	0	1	8.24e-15	1.49e-14	0.102737
missense	-2	2L	13288093	T	G	FBgn0032499	CG6116-RA:p.Leu365Arg				0.604247	1	1	-0.395753	0.0275454	0.0275861	0.292122
missense	-2	3L	18897443	A	T	FBgn0027057	CSN1b-RA:p.Leu127Gln				0.95139	0.217855	0	0.842463	0.000730779	2.92e-06	0.153101
missense	-2	3R	21531745	G	A	FBgn0051092	LpR2-RF:p.[Thr723Ile]; LpR2-RE:p.[Thr926Ile]; LpR2-RG:p.[Thr925Ile]				1	0.546585	0.5422	0.455607	0.0253429	0.00365052	0.418578
missense	-2	3R	21565263	T	A	FBgn0051092	LpR2-RD:p.[Asn24Tyr]; LpR2-RC:p.[Asn24Tyr]; LpR2-RA:p.[Asn24Tyr]; LpR2-RE:p.[Asn24Tyr]; LpR2-RG:p.[Asn24Tyr]				1	0.44048	0.671293	0.444113	0.0227784	0.000354566	0.130051
missense	-2	3L	17350500	A	G	FBgn0036714	CG7692-RA:p.Met1304Val				0.442483	0.11765	0	0.383658	0.00889514	0.00410708	0.373367
missense	-2	3L	10454444	A	G	FBgn0011802	Gem3-RA:p.Ile542Thr				0.19129	0.717443	0.759257	-0.54706	0.0176235	0.0222923	0.841272
missense	-2	3L	10454747	CT	GG	FBgn0011802	Gem3-RA:p.Arg441Pro				0.112135	0.472887	0.738237	-0.493427	0.0260029	0.000106901	0.0742976
missense	-2	2R	13239842	A	G	FBgn0261642	mbl-RA:p.Tyr190Cys				0.89035	0.18466	0.17647	0.709785	0.000353134	0.000221743	0.494291
missense	-2	2R	13134447	T	C	FBgn0261642	CG12699-RB:p.Tyr94Cys				0.532143	0.18889	0.12406	0.375668	0.0185113	0.00501634	0.665218
missense	-2	2L	5526307	A	T	FBgn0051989	Cap-D3-RA:p.[Gln120Leu]; Cap-D3-RB:p.[Gln120Leu]				0.462303	0.33333	0.15	0.220638	0.0409934	0.00296287	0.642151
missense	-2	2L	8365433	A	G	FBgn0261437	CSN8-RB:p.Met115Val				0	0.553873	0.472897	-0.513385	0.0120684	0.00587641	0.627873
missense	-2	3R	3678074	C	T	FBgn0085413	CG34384-RC:p.[Ser1674Phe]; CG34384-RA:p.[Ser1651Phe]; CG34384-RD:p.[Ser1627Phe]; CG34384-RE:p.[Ser1692Phe]; CG34384-RB:p.[Ser1489Phe]				1	0.51923	0.513283	0.483743	0.0195654	0.010185	0.457631
missense	-2	3L	9725142	A	T	FBgn0036040	CG6749-RA:p.Leu342Gln				0.28571	1	0.81774	-0.62316	0.000680994	0.00810437	0.181636
missense	-2	3R	26815580	G	A	FBgn0004573	CG31008-RA:p.Ala20Val				0.705687	0.42857	0	0.491402	0.024184	0.000553446	0.372766
missense	-2	3L	7164631	A	G	FBgn0263218	Dscam2-RF:p.Ile752Thr				0.954953	0	0	0.954953	2.9e-05	2.9e-05	0.411617
missense	-2	X	10082443	A	T	FBgn0264503	CG15311-RA:p.Gln187Leu				0.944443	0	0	0.944443	7.05e-05	7.05e-05	0.865515
missense	-2	3L	12182029	C	T	FBgn0000592	Est-6-RA:p.Thr24Ile				0.899123	0.453703	0.24671	0.548917	0.0403822	0.00513155	0.159954
missense	-2	3L	3465323	C	T	FBgn0041164	armi-RA:p.[Ser991Leu]; armi-RB:p.[Ser905Leu]				0.53442	0	0	0.53442	0.0038266	0.00383507	0.192097
missense	-2	2R	1980307	G	A	FBgn0000546	EcR-RB:p.[Thr808Ile]; EcR-RG:p.[Thr808Ile]; EcR-RC:p.[Thr599Ile]; EcR-RA:p.[Thr779Ile]; EcR-RD:p.[Thr779Ile]; EcR-RE:p.[Thr779Ile]				0.805697	0	0	0.805697	8.23e-05	8.22e-05	0.609704
missense	-2	3L	14768249	G	A	FBgn0036448	mop-RA:p.Ala148Val				0.4125	0	0	0.4125	0.00221059	0.00221386	0.52379
missense	-2	3R	16954203	C	A	FBgn0038858	CG5793-RA:p.[Pro111His]; CG5793-RC:p.[Pro111His]				0.47765	1	1	-0.52235	0.00450919	0.00449766	0.303033
missense	-2	3R	16954203	C	G	FBgn0038858	CG5793-RA:p.[Pro111Arg]; CG5793-RC:p.[Pro111Arg]				0.52235	0	0	0.52235	0.00452985	0.00452616	0.692111
missense	-2	3R	19632976	A	G	FBgn0053111	CG33111-RA:p.[Phe210Ser]; CG33111-RB:p.[Phe210Ser]; CG33111-RC:p.[Phe210Ser]				0.72659	0	0	0.72659	3.75e-05	3.75e-05	0.658517
missense	-2	3R	19633446	T	C	FBgn0053111	CG33111-RA:p.[Glu75Gly]; CG33111-RB:p.[Glu75Gly]; CG33111-RC:p.[Glu75Gly]				0.76663	0	0	0.76663	0.000126526	0.00012647	0.739481
missense	-2	3R	19633551	T	C	FBgn0053111	CG33111-RA:p.[Glu61Gly]; CG33111-RB:p.[Glu61Gly]; CG33111-RC:p.[Glu61Gly]				0.19224	0	0	0.19224	0.0180826	0.0181175	0.740748
missense	-2	3R	9434856	G	A	FBgn0038160	CG9759-RA:p.Ser22Leu				0.619753	0	0	0.619753	1.24e-05	1.25e-05	0.128939
missense	-2	3R	20672991	A	G	FBgn0013953	Esp-RA:p.[Tyr11Cys]; Esp-RB:p.[Tyr11Cys]				1	0.33684	0	0.83158	0.00483125	2.97e-14	0.176819
missense	-2	3R	20675621	C	T	FBgn0013953	Esp-RA:p.[Ser544Leu]; Esp-RB:p.[Ser544Leu]				1	0.412217	0.46429	0.561747	1.83e-05	0.00548011	0.176175
missense	-2	3R	13628465	C	T	FBgn0038548	CG17806-RA:p.Gly125Glu				1	0.534077	0.23201	0.616957	0.0459828	0.000728002	0.111416
missense	-2	3R	13628345	T	A	FBgn0038548	CG17806-RA:p.Gln165Leu				1	0.60714	0.37267	0.510095	0.0237469	0.0113102	0.150004
missense	-2	2R	20080648	C	A	FBgn0034987	CG3363-RA:p.[Ser1529Tyr]; CG3363-RB:p.[Ser1529Tyr]				0.756173	0.23529	0.26738	0.504838	0.0010221	0.00486237	0.48056
missense	-2	3L	21668599	C	A	FBgn0037116	CG7158-RA:p.Trp1273Leu				0	0.58254	0.557373	-0.569957	0.00158026	0.00345999	0.84255
missense	-2	2R	1664064	A	G	FBgn0025693	CG11163-RA:p.[Val261Ala]; CG11163-RB:p.[Val261Ala]; CG11163-RC:p.[Val261Ala]; CG11163-RD:p.[Val261Ala]				0.789353	0	0	0.789353	0.000265809	0.000265639	0.68021
missense	-2	3R	24151483	A	G	FBgn0261618	larp-RF:p.[Val26Ala]; larp-RD:p.[Val290Ala]; larp-RG:p.[Val290Ala]; larp-RH:p.[Val290Ala]				0.646963	0	0	0.646963	1.48e-06	1.48e-06	0.126349
missense	-2	3R	24159627	A	G	FBgn0261618	larp-RD:p.[Val205Ala]; larp-RG:p.[Val205Ala]; larp-RH:p.[Val205Ala]				0.25	1	1	-0.75	0.000386609	0.000386713	0.616061
missense	-2	2R	18384480	A	G	FBgn0003175	px-RB:p.[Val1479Ala]; px-RA:p.[Val1939Ala]				0.841853	0	0	0.841853	2.45e-06	2.45e-06	0.724659
missense	-2	2R	18443318	A	G	FBgn0003175	px-RA:p.Val324Ala				1	0.36932	0.563887	0.533397	0.00358768	0.021652	0.137364
missense	-2	2R	18438286	T	C	FBgn0003175	CG6018-RA:p.Val170Ala				0.83583	0.38462	0.419693	0.433673	0.00726286	0.0493876	0.195889
missense	-2	3R	26021875	C	T	FBgn0039755	CG15531-RA:p.Val6Met				0.79167	0.39706	0	0.59314	0.0311464	0.000390601	0.141524
missense	-2	X	10968318	C	T	FBgn0003366	sev-RA:p.Val1786Met				0.90909	0.35714	0	0.73052	0.00618183	0.00055799	0.372366
missense	-2	3L	5654385	AC	TT	FBgn0085447	Sse-RA:p.Gly241Glu				1	0	0	1	1.76e-15	3.72e-15	0.523739
missense	-2	3L	5689501	T	C	FBgn0085447	sif-RG:p.Ile251Thr				1	0	0	1	3.02e-15	1.14e-14	0.396511
missense	-2	3L	5734019	C	T	FBgn0085447	sif-RF:p.[Ser2282Leu]; sif-RD:p.[Ser2271Leu]				1	0	0	1	2.62e-14	2.9e-15	0.885282
missense	-2	2R	3161210	G	A	FBgn0033155	Br140-RA:p.Ala1287Val				1	0	0.3147	0.84265	7.22e-14	0.004804	0.0604444
missense	-2	3L	2374138	A	G	FBgn0035336	CG9004-RA:p.Met115Val				0.95238	0.449377	0.4061	0.524642	0.00868415	0.0065315	0.76301
missense	-2	3L	2373965	A	T	FBgn0035336	CG9004-RA:p.Gln57Leu				0.89484	0.330373	0.533335	0.462986	0.000579828	0.0451538	0.894811
missense	-2	2R	16142630	AC	GT	FBgn0025720	Ate1-RA:p.[Val452Thr]; Ate1-RB:p.[Val459Thr]; Ate1-RC:p.[Val453Thr]				0	0.98485	1	-0.992425	3.53e-07	3.1e-14	0.379275
missense	-2	2L	10217141	T	C	FBgn0024320	Npc1a-RA:p.[Glu317Gly]; Npc1a-RB:p.[Glu317Gly]; Npc1a-RC:p.[Glu317Gly]; Npc1a-RD:p.[Glu317Gly]				0.919873	0.27375	0	0.782998	0.00268567	2.17e-05	0.152848
missense	-2	3R	15330090	C	T	FBgn0260003	Dys-RB:p.Ala170Val				1	0	0.09524	0.95238	3.5e-14	6.96e-06	0.37341
missense	-2	3R	10100417	A	G	FBgn0003862	trx-RB:p.[Val219Ala]; trx-RC:p.[Val219Ala]; trx-RE:p.[Val219Ala]; trx-RA:p.[Val587Ala]; trx-RD:p.[Val587Ala]				1	0.555555	0.37526	0.534593	0.0286102	0.0159068	0.673677
missense	-2	2L	1293637	C	T	FBgn0041097	robo3-RA:p.Ala1327Val				0.65	0	0	0.65	0.00334714	0.00334148	0.321909
missense	-2	3L	10872574	G	T	FBgn0036105	blos4-RA:p.Cys84Phe				0.560527	0.16518	0.17391	0.390982	0.00353566	0.00250962	0.557027
missense	-2	3R	8338739	G	A	FBgn0250910	Octbeta3R-RK:p.[Ser428Leu]				0.91486	0.24936	0.307695	0.636332	0.00519891	0.00444371	0.827798
missense	-2	3R	15597168	C	A	FBgn0024963	CG6300-RA:p.Ser537Ile				0.649043	0.21445	0.12549	0.479073	0.0147513	0.00394501	0.579127
missense	-2	2R	2668071	TC	CT	FBgn0085421	Cyp6a2-RA:p.Gly289Glu				0.83884	0	0	0.83884	9.29e-05	9.29e-05	0.990408
missense	-2	2R	14446847	C	G	FBgn0050115	CG30115-RE:p.Gly607Arg				1	0	0	1	4.42e-14	3.73e-14	0.204353
missense	-2	2R	19247209	T	C	FBgn0085453	CG34424-RA:p.Ile45Thr				0	0.565707	0.4355	-0.500603	0.0058486	0.0142934	0.431606
missense	-2	2R	19247079	C	T	FBgn0085453	CG34424-RA:p.Ala26Val				1	0.55052	0.586883	0.431298	0.00404417	0.00541183	0.749513
missense	-2	3R	22769916	T	C	FBgn0015541	sda-RA:p.[Val985Ala]; sda-RC:p.[Val997Ala]; sda-RB:p.[Val1096Ala]				0.497757	1	1	-0.502243	0.00901363	0.009008	0.757834
missense	-2	2L	8320831	T	C	FBgn0032020	CG7787-RA:p.Val118Ala				0	0.47619	0.606057	-0.541123	0.00157704	3.65e-05	0.134514
missense	-2	3L	3898540	G	T	FBgn0035470	CG14980-RB:p.Pro147His				0.97619	0.56247	0.480323	0.454793	0.0363862	0.0127007	0.661388
missense	-2	3R	4118839	G	A	FBgn0051463	CG31463-RA:p.Cys251Tyr				1	0.46346	0.351853	0.592343	0.0266956	0.00271829	0.579212
missense	-2	2L	19583489	C	A	FBgn0032813	CG10262-RB:p.[Ser63Ile]; CG10262-RA:p.[Ser102Ile]				0.901463	0	0	0.901463	7.69e-05	7.69e-05	0.769757
missense	-2	2R	15127117	C	T	FBgn0010434	cora-RA:p.Ala756Val				1	0.613053	0.577777	0.404585	0.0130867	0.00558573	0.78505
missense	-2	3L	17991823	C	T	FBgn0000568	Eip75B-RC:p.Val137Met				1	0.29167	0	0.854165	0.00265847	8.28e-15	0.183692
missense	-2	3R	12169842	C	T	FBgn0038418	pad-RB:p.Thr538Ile				0.62281	0	0	0.62281	0.004766	0.00477176	0.472439
missense	-2	3L	7375727	T	C	FBgn0016983	smid-RA:p.[Val141Ala]; smid-RC:p.[Val141Ala]				0.14286	0.767423	0.666103	-0.573903	0.000570336	0.00237628	0.342676
missense	-2	2R	8766183	T	A	FBgn0002069	Nmda1-RF:p.[Asn17Tyr]; Nmda1-RC:p.[Asn25Tyr]; Nmda1-RD:p.[Asn25Tyr]; Nmda1-RE:p.[Asn25Tyr]; Nmda1-RA:p.[Asn14Tyr]; Nmda1-RB:p.[Asn14Tyr]				1	0.691667	0.486115	0.411109	0.0281601	0.0155339	0.125902
missense	-2	3L	1436599	C	A	FBgn0003138	SA-2-RD:p.[Cys289Phe]; SA-2-RC:p.[Cys289Phe]				0.36237	0	0	0.36237	0.00383059	0.00384518	0.146081
missense	-2	3L	1434516	G	C	FBgn0003138	SA-2-RC:p.Pro937Arg				0.34839	0	0	0.34839	0.0232658	0.0232703	0.939882
missense	-2	3L	1412381	T	C	FBgn0003138	CG9168-RA:p.Val369Ala				0.35447	1	1	-0.64553	0.00329345	0.00329185	0.745361
missense	-2	3L	1411964	T	G	FBgn0003138	CG9168-RA:p.Leu230Arg				0.42544	0	0	0.42544	0.00839969	0.00839747	0.913563
missense	-2	3L	1411616	T	C	FBgn0003138	CG9168-RA:p.Ile114Thr				0.371197	0.90909	0.822583	-0.49464	0.0255726	0.0494598	0.379595
missense	-2	3L	1400949	A	C	FBgn0003138	CG32320-RC:p.His565Pro				0.714123	0.19872	0.214743	0.507392	0.0147858	0.0192564	0.374291
missense	-2	3L	1471936	T	C	FBgn0003138	CG32319-RA:p.Met24Val				0	1	1	-1	9.11e-15	1.43e-14	0.107466
missense	-2	3L	1471956	T	G	FBgn0003138	CG32319-RA:p.Asp17Ala				0	1	1	-1	7.49e-14	6.75e-14	0.619473
missense	-2	2L	2224069	A	G	FBgn0031401	CG7082-RA:p.[Arg224Gly]; CG7082-RB:p.[Arg224Gly]; CG7082-RC:p.[Arg224Gly]; CG7082-RD:p.[Arg224Gly]				0.25614	0	0	0.25614	0.0103534	0.0103368	0.582743
missense	-2	3L	12738880	C	T	FBgn0052109	CG32109-RA:p.Ser38Leu				1	0.393777	0	0.803112	0.0146752	2.68e-14	0.05582
missense	-2	2R	2769932	C	T	FBgn0033113	Spn42Dc-RA:p.[Ala222Val]; Spn42Dc-RB:p.[Ala222Val]				1	0	0.5625	0.71875	8.54e-15	0.012266	0.37376
missense	-2	2L	11017848	C	T	FBgn0032330	CG14913-RA:p.[Thr226Ile]; CG14913-RB:p.[Thr226Ile]				0.81255	0.363095	0	0.631003	0.0427827	0.000634316	0.240281
missense	-2	3L	11153788	G	A	FBgn0052082	CG32082-RA:p.[Val555Met]; CG32082-RB:p.[Val555Met]; CG32082-RC:p.[Val555Met]				0	0.671793	0.839353	-0.755573	0.00484434	7.89e-06	0.242302
missense	-2	3L	11153222	T	C	FBgn0052082	CG32082-RA:p.[Val366Ala]; CG32082-RB:p.[Val366Ala]; CG32082-RC:p.[Val366Ala]				1	0.21429	0.180555	0.802577	0.000203401	0.000437758	0.678102
missense	-2	3R	8289146	C	A	FBgn0038058	CG5608-RA:p.Arg474Leu				0.19048	0.892787	0.894443	-0.703135	0.00145705	0.00202029	0.982953
missense	-2	3R	17951858	T	C	FBgn0259736	CG42390-RD:p.[Val670Ala]; CG42390-RB:p.[Val670Ala]				0.899853	0.326925	0.358335	0.557223	0.0103188	0.00842053	0.922439
missense	-2	3R	7000606	G	A	FBgn0040250	Ugt86Dj-RA:p.Ala94Val				0.425947	0.25	0.09302	0.254437	0.0163164	0.000477246	0.587795
missense	-2	2L	192484	C	T	FBgn0016977	spen-RB:p.[Thr2767Ile]; spen-RA:p.[Thr2767Ile]; spen-RD:p.[Thr2712Ile]; spen-RC:p.[Thr2710Ile]				1	0.429597	0.336205	0.617099	0.000755119	0.00610539	0.265742
missense	-2	2L	188626	C	T	FBgn0016977	spen-RB:p.[Ala1481Val]; spen-RA:p.[Ala1481Val]; spen-RD:p.[Ala1426Val]; spen-RC:p.[Ala1424Val]				1	0.28532	0.145455	0.784612	0.000111476	9.83e-05	0.065477
missense	-2	3L	21081751	T	G	FBgn0020294	CG33285-RA:p.His95Pro				0.669247	0.266667	0.21053	0.430648	0.0163832	0.00684094	0.0695945
missense	-2	3L	7907905	C	T	FBgn0035825	CG8111-RA:p.Val77Met				0.95635	0	0.26667	0.823015	2.41e-06	0.00070641	0.372357
missense	-2	3LHet	2253834	C	T	FBgn0260987	vtd-RA:p.Thr250Ile				0.847223	0.30129	0.204765	0.594196	0.00389555	0.00288413	0.144035
missense	-2	3LHet	2254923	T	C	FBgn0260987	vtd-RA:p.Ile575Thr				1	0.26317	0.28571	0.72556	5.48e-05	0.00105442	0.520631
missense	-2	2L	7714154	AC	GA	FBgn0053296	CG33296-RB:p.Arg567Leu				1	0.683483	0.649317	0.3336	0.0221474	0.00447542	0.767014
missense	-2	2R	9438334	G	A	FBgn0053156	CG33156-RE:p.Ala43Val				0.26415	0	0	0.26415	0.00020205	0.000203107	0.17741
missense	-2	2R	7744486	T	C	FBgn0013756	Mtor-RA:p.Val1262Ala				0.177723	0	0	0.177723	0.000832139	0.000830382	0.708593
missense	-2	3R	5266983	T	G	FBgn0261552	ps-RL:p.Ile113Ser				0.24074	0.78552	0.972223	-0.638132	0.0190613	0.00200748	0.211201
missense	-2	2L	19967461	A	G	FBgn0014000	Hf-RA:p.Val44Ala				0.615567	0	0	0.615567	0.00994025	0.0099397	0.936632
missense	-2	2L	19967459	T	C	FBgn0014000	Hf-RA:p.Arg45Gly				0.581897	0	0	0.581897	0.0136134	0.0136036	0.683672
missense	-2	3L	19831587	T	C	FBgn0001324	kto-RA:p.Val584Ala				0.58427	0	0	0.58427	0.00532427	0.00531061	0.124257
missense	-2	2R	17172691	C	T	FBgn0034611	CG10069-RB:p.[Ala554Val]; CG10069-RA:p.[Ala516Val]; CG10069-RC:p.[Ala516Val]				1	0	0	1	9.69e-16	8.34e-15	0.565981
missense	-2	3R	19043788	C	T	FBgn0262975	cnc-RC:p.[Gly281Glu]; cnc-RJ:p.[Gly281Glu]; cnc-RK:p.[Gly281Glu]				0.38693	0	0	0.38693	0.033223	0.0332571	0.629273
missense	-2	3R	20048813	A	T	FBgn0026257	cav-RE:p.[Asn234Tyr]; cav-RA:p.[Asn236Tyr]; cav-RB:p.[Asn228Tyr]; cav-RD:p.[Asn228Tyr]				0.62554	0	0	0.62554	0.0216836	0.021704	0.582285
missense	-2	3R	15231053	AA	CC	FBgn0038704	CG5316-RB:p.[Asn440Pro]; CG5316-RC:p.[Asn440Pro]; CG5316-RD:p.[Asn350Pro]				0.492473	0	0.225	0.379973	0.00125206	0.0317386	0.15861
missense	-2	3L	21619555	T	C	FBgn0037108	CG11306-RA:p.Val15Ala				0	0.769087	0.747387	-0.758237	0.000913208	0.000478352	0.854432
missense	-2	3R	16480754	G	A	FBgn0038818	Nep4-RB:p.[Thr474Ile]				0.585317	0	0	0.585317	0.000959917	0.000960353	0.807884
missense	-2	3R	16480083	G	A	FBgn0038818	Nep4-RB:p.[Ser659Leu]				0.2	0.419797	0.505553	-0.262675	0.00916244	0.0323709	0.528719
missense	-2	3R	16480026	A	G	FBgn0038818	Nep4-RB:p.[Phe678Ser]				0	0.358783	0.517347	-0.438065	0.00192175	0.0465864	0.447017
missense	-2	3R	16480086	A	G	FBgn0038818	Nep4-RB:p.[Ile658Thr]				0.19048	0.431547	0.511293	-0.28094	0.00834427	0.0356086	0.587269
missense	-2	3R	4662528	A	G	FBgn0262614	pyd-RL:p.[Val1214Ala]; pyd-RH:p.[Val1375Ala]; pyd-RK:p.[Val1375Ala]				0.79119	0	0	0.79119	0.000327139	0.000327003	0.76272
missense	-2	3R	4690851	A	G	FBgn0262614	pyd-RJ:p.[Val263Ala]; pyd-RL:p.[Val21Ala]; pyd-RH:p.[Val182Ala]; pyd-RK:p.[Val182Ala]				0.729823	0	0	0.729823	3.27e-05	3.27e-05	0.962373
missense	-2	3R	4682792	T	G	FBgn0262614	pyd-RI:p.[His22Pro]; pyd-RN:p.[His262Pro]				0.762963	0	0	0.762963	0.00230727	0.0023108	0.261886
missense	-2	2R	15319720	G	A	FBgn0020440	Fak56D-RD:p.[Ser1171Leu]; Fak56D-RF:p.[Ser869Leu]; Fak56D-RA:p.[Ser871Leu]; Fak56D-RB:p.[Ser871Leu]; Fak56D-RC:p.[Ser871Leu]; Fak56D-RG:p.[Ser871Leu]				0.93744	0	0	0.93744	7.36e-06	7.37e-06	0.525103
missense	-2	2L	8314942	A	G	FBgn0032018	CG7806-RA:p.Glu954Gly				0	0.41587	0.342313	-0.379092	0.0354862	0.017207	0.666606
missense	-2	X	1189671	G	A	FBgn0025641	DAAM-RC:p.[Thr108Ile]; DAAM-RD:p.[Thr116Ile]				1	0	0	1	1.04e-13	3.28e-14	0.633612
missense	-2	3L	19291049	T	C	FBgn0028380	fal-RA:p.[Val309Ala]; fal-RB:p.[Val257Ala]				0	0.466423	0.643283	-0.554853	0.0248911	0.00342377	0.35435
missense	-2	3R	27025235	CG	AT	FBgn0039827	CG1544-RA:p.Pro100His				0.460317	0	0	0.460317	0.0196298	0.0196284	0.975335
missense	-2	2R	19623852	G	A	FBgn0000562	egl-RB:p.Ala816Val				1	0	0	1	3.78e-14	7.09e-14	0.836669
missense	-2	3L	12886986	C	A	FBgn0036323	CG14118-RA:p.Pro237His				1	0.718013	0.47859	0.401698	0.0184311	0.000374467	0.0512114
missense	-2	3R	21087760	C	A	FBgn0039304	CG10425-RA:p.Ser98Ile				0	0.430457	0.453383	-0.44192	0.0465468	0.00936638	0.905257
missense	-2	2R	13022020	C	T	FBgn0034198	CG11400-RA:p.Ser103Leu				1	0.38095	0.4588	0.580125	0.00235831	0.000346518	0.0709892
missense	-2	3R	1678036	A	C	FBgn0029088	disp-RA:p.Leu727Trp				1	0.28889	0.32738	0.691865	0.00020398	0.00353609	0.767057
missense	-2	2R	17580452	GG	CA	FBgn0034656	CG17922-RA:p.Ala982Val				1	0	0	1	2.98e-14	2.6e-14	1
missense	-2	3L	7359121	C	T	FBgn0035772	Sh3beta-RE:p.Gly228Glu				0	0.482273	0.5125	-0.497387	0.00853425	0.000413188	0.799529
missense	-2	2R	2618063	T	C	FBgn0010482	l(2)01289-RG:p.Glu921Gly				0.167597	1	0.84857	-0.756688	1.39e-07	0.000893884	0.116672
missense	-2	X	17900903	G	A	FBgn0003380	CG12672-RA:p.Ser208Leu				0.68254	0	0	0.68254	0.0240727	0.0240914	0.49765
missense	-2	3L	2187363	T	C	FBgn0035313	CG13810-RB:p.Ile396Thr				0.410687	0	0	0.410687	7.76e-05	7.75e-05	0.739321
missense	-2	2L	6853131	C	T	FBgn0017551	Rca1-RA:p.Thr237Ile				0	0.53328	0.347737	-0.440508	0.00240601	0.00165949	0.110105
missense	-2	2L	16468499	G	A	FBgn0005677	dac-RG:p.[Thr953Ile]; dac-RC:p.[Thr955Ile]; dac-RA:p.[Thr962Ile]; dac-RF:p.[Thr962Ile]; dac-RD:p.[Thr964Ile]; dac-RB:p.[Thr971Ile]; dac-RE:p.[Thr971Ile]				0.20284	0	0	0.20284	0.00850469	0.00854654	0.258639
missense	-2	3R	22410745	AC	GT	FBgn0263289	scrib-RN:p.Thr1963Val				0.594443	1	1	-0.405557	0.0294954	0.0294504	0.254761
missense	-2	3R	23450255	A	G	FBgn0039530	CG5612-RA:p.Val121Ala				1	0.663257	0.486403	0.42517	0.00415099	0.00665154	0.197535
missense	-2	3R	23766104	T	C	FBgn0039560	CG5514-RA:p.[Val524Ala]; CG5514-RC:p.[Val524Ala]; CG5514-RB:p.[Val524Ala]				1	0	0.17647	0.911765	3.47e-14	8.91e-05	0.373283
missense	-2	3R	23766086	T	C	FBgn0039560	CG5514-RA:p.[Phe518Ser]; CG5514-RC:p.[Phe518Ser]; CG5514-RB:p.[Phe518Ser]				1	0.555555	0.597223	0.423611	0.0285219	0.00131754	0.308147
missense	-2	3L	1522798	T	C	FBgn0261243	Psa-RE:p.[Val1014Ala]; Psa-RC:p.[Val1036Ala]; Psa-RA:p.[Val827Ala]; Psa-RB:p.[Val827Ala]; Psa-RD:p.[Val827Ala]; Psa-RF:p.[Val827Ala]; Psa-RH:p.[Val827Ala]				0.925927	0	0.367645	0.742104	0.000234589	0.0137833	0.165113
missense	-2	3L	1505462	G	A	FBgn0261243	cue-RA:p.Ala142Val				0.175963	0	0	0.175963	0.0442772	0.0441932	0.704794
missense	-2	3L	13990319	A	G	FBgn0036395	CG17361-RA:p.Tyr5Cys				0	0.742347	0.632843	-0.687595	8.15e-05	0.00905594	0.481981
missense	-2	3L	13990334	T	G	FBgn0036395	CG17361-RA:p.Leu10Arg				0.851983	0.146465	0	0.778751	0.00188332	0.000665161	0.138981
missense	-2	3R	15859847	C	T	FBgn0038768	CG4936-RA:p.Ala501Val				1	0.18182	0	0.90909	0.000102043	1.28e-14	0.375638
missense	-2	3R	4557946	T	C	FBgn0037622	CG8202-RA:p.Val9Ala				0.60293	0	0	0.60293	0.0124441	0.0124477	0.661532
missense	-2	2R	11451514	A	G	FBgn0034032	CG8195-RA:p.Val208Ala				0.52501	0	0	0.52501	0.0021651	0.00216106	0.290708
missense	-2	3L	11744427	A	G	FBgn0036202	Gr68a-RA:p.Tyr8Cys				0.502437	0	0	0.502437	0.010456	0.0104554	0.984515
missense	-2	3R	13559400	C	T	FBgn0038540	CG14321-RA:p.Thr14Ile				1	0	0	1	2.41e-15	9.04e-15	0.0637181
missense	-2	3R	13559412	C	A	FBgn0038540	CG14321-RA:p.Ser18Tyr				1	0	0	1	2.32e-14	3.67e-14	0.746316
missense	-2	3R	13559394	C	T	FBgn0038540	CG14321-RA:p.Ser12Leu				1	0	0	1	1.1e-15	4.11e-14	0.475498
missense	-2	2L	10285540	G	A	FBgn0032208	CG5604-RA:p.Ala1569Val				1	0.572725	0.177885	0.624695	0.0321047	0.00019152	0.264285
missense	-2	3R	12022579	G	A	FBgn0086370	sra-RA:p.Gly274Glu				0.97619	0	0	0.97619	2.13e-06	2.13e-06	0.923551
missense	-2	2R	11461092	G	A	FBgn0034033	CG8204-RA:p.Thr31Ile				0.801853	0	0	0.801853	0.00356374	0.00356787	0.339876
missense	-2	2R	11460887	T	A	FBgn0034033	CG8204-RA:p.Gln80Leu				0.825323	0.17391	0	0.738368	0.00184974	0.000702889	0.375145
missense	-2	3R	25593206	T	C	FBgn0001297	kay-RD:p.Val167Ala				0.63143	0.27241	0.217785	0.386333	0.0142237	0.0109109	0.22105
missense	-2	3R	25593197	C	T	FBgn0001297	kay-RD:p.Ala164Val				0.60958	0.23069	0.211645	0.388413	0.00612722	0.00906233	0.305631
missense	-2	3R	20842084	C	T	FBgn0039257	tnc-RC:p.[Thr1182Ile]; tnc-RD:p.[Thr1182Ile]				0.932657	0.2133	0.38108	0.635467	0.00102354	0.000516474	0.128996
missense	-2	3R	20841208	G	T	FBgn0039257	tnc-RC:p.[Ser890Ile]; tnc-RD:p.[Ser890Ile]				0.127943	0.64753	0.622223	-0.506933	0.00136696	0.00468592	0.818483
missense	-2	3R	20844859	GC	AG	FBgn0039257	tnc-RC:p.[Gly2107Glu]; tnc-RD:p.[Gly2107Glu]				0	0.48052	0.56239	-0.521455	0.0317202	0.0145715	0.705171
missense	-2	3R	20841202	C	T	FBgn0039257	tnc-RC:p.[Ala888Val]; tnc-RD:p.[Ala888Val]				0	0.461637	0.617677	-0.539657	0.00217981	0.0016835	0.213276
missense	-2	2R	17223017	CC	GT	FBgn0020306	dom-RE:p.Pro2314Arg				1	0	0	1	6.43e-15	1.38e-15	0.618018
missense	-2	2L	19890779	G	A	FBgn0263873	CG10481-RB:p.Thr490Ile				0.6	0	0	0.6	0.00428466	0.00428996	0.140807
missense	-2	2L	12539035	A	G	FBgn0259176	bun-RF:p.[Val98Ala]; bun-RG:p.[Val98Ala]; bun-RA:p.[Val207Ala]				0.55177	0	0	0.55177	0.0043669	0.00436309	0.630791
missense	-2	2L	12539431	G	A	FBgn0259176	bun-RA:p.Ser75Leu				0.822223	0	0	0.822223	0.000512439	0.000513353	0.122806
missense	-2	2R	17209882	G	A	FBgn0050394	CG30394-RA:p.[Thr152Ile]; CG30394-RB:p.[Thr152Ile]				1	0	0	1	8.26e-15	8.55e-17	0.140595
missense	-2	2R	9020841	C	T	FBgn0259876	Cap-G-RG:p.[Ala8Val]; Cap-G-RF:p.[Ala8Val]				0.214817	0	0	0.214817	0.00288351	0.00286901	0.352861
missense	-2	3R	13489955	C	T	FBgn0038532	CG14322-RA:p.Thr1228Ile				0	0.391667	0.428623	-0.410145	0.00815355	0.0155318	0.793467
missense	-2	3R	13487050	AT	TC	FBgn0038532	CG14322-RA:p.Ile260Ser				1	0.353333	0.355627	0.64552	0.00302458	0.011246	0.989499
missense	-2	3R	13489211	G	A	FBgn0038532	CG14322-RA:p.Gly980Glu				0	0.239317	0.408247	-0.323782	0.0101325	0.0373849	0.302884
missense	-2	3R	13487755	A	G	FBgn0038532	CG14322-RA:p.Arg495Gly				1	0.395993	0.318683	0.642662	0.00253507	0.000777188	0.545749
missense	-2	3L	2982781	G	A	FBgn0035383	CG2107-RA:p.Gly533Glu				0.56952	0	0	0.56952	0.00235248	0.00235413	0.780117
missense	-2	2R	8219703	C	T	FBgn0264560	garz-RC:p.[Ala1683Val]; garz-RA:p.[Ala1682Val]				1	0	0	1	1.46e-14	5.49e-15	0.076595
missense	-2	2R	15352580	C	T	FBgn0260934	par-1-RQ:p.[Ala145Val]; par-1-RH:p.[Ala145Val]; par-1-RI:p.[Ala145Val]; par-1-RJ:p.[Ala145Val]; par-1-RO:p.[Ala145Val]				0.87745	0	0	0.87745	0.000264977	0.000264937	0.830841
missense	-2	2L	9954708	G	A	FBgn0032169	CG4709-RA:p.Gly45Glu				1	0	0.21429	0.892855	3.96e-15	0.000202948	0.373901
missense	-2	2L	9955367	A	T	FBgn0032169	CG4709-RA:p.Asn265Tyr				0.96	0	0.14286	0.88857	1.81e-05	0.0001261	0.370221
missense	-2	2R	18535735	G	A	FBgn0085474	CG34445-RA:p.Ala75Val				0.74267	0	0	0.74267	1.51e-07	1.51e-07	0.934326
missense	-2	2L	13310809	A	C	FBgn0264308	CG16970-RA:p.Phe5Cys				1	0.33333	0.27494	0.695865	0.00132058	0.000312835	0.268134
missense	-2	2R	6318254	C	T	FBgn0262114	RanBPM-RE:p.[Ser55Leu]; RanBPM-RD:p.[Ser55Leu]; RanBPM-RA:p.[Ser55Leu]				0.5365	0	0.15789	0.457555	0.0030187	0.00803062	0.372557
missense	-2	3R	26024512	A	C	FBgn0039756	CG9743-RA:p.Ile35Ser				0	0.592563	0.455093	-0.523828	0.0182848	0.0457965	0.568382
missense	-2	3R	10642733	A	G	FBgn0053555	btsz-RD:p.[Val174Ala]; btsz-RC:p.[Val1302Ala]; btsz-RI:p.[Val2391Ala]				1	0.433335	0.405983	0.580341	0.00793415	0.00026903	0.485904
missense	-2	2R	17371062	A	T	FBgn0026369	Sara-RA:p.[Gln395Leu]; Sara-RB:p.[Gln395Leu]				0	0.972223	0.91228	-0.942252	4e-06	0.000133569	0.433085
missense	-2	3R	13509879	T	C	FBgn0051251	CG31251-RA:p.Tyr211Cys				0	0.45641	0.676857	-0.566633	0.00953807	0.000126768	0.110726
missense	-2	2L	835707	A	C	FBgn0020304	drongo-RG:p.[Trp420Gly]; drongo-RF:p.[Trp490Gly]				0.347163	0	0	0.347163	0.0473268	0.0473829	0.687825
missense	-2	2R	1966602	A	G	FBgn0033061	CG14590-RA:p.Val472Ala				0.823627	0	0	0.823627	0.000378096	0.000377642	0.311671
missense	-2	3R	19457290	C	T	FBgn0051145	CG31145-RC:p.[Val215Met]; CG31145-RD:p.[Val215Met]				1	0.53823	0.257055	0.602357	0.0197991	0.000654032	0.0706729
missense	-2	3L	2160317	A	G	FBgn0035308	CG15822-RB:p.Val166Ala				0	0.541237	0.81208	-0.676658	0.0363713	2.13e-08	0.196759
missense	-2	2R	7698685	C	T	FBgn0033652	ths-RB:p.[Ala509Val]; ths-RA:p.[Ala520Val]; ths-RC:p.[Ala520Val]				0.491203	0	0	0.491203	0.0106391	0.0106637	0.270416
missense	-2	2R	7675819	T	A	FBgn0033652	Tango3-RB:p.Asn394Tyr				0.37315	0	0	0.37315	0.00035001	0.000349591	0.763066
missense	-2	2R	6691425	A	G	FBgn0027499	wde-RA:p.Val569Ala				0.363175	1	1	-0.636825	0.015263	0.0152828	0.230597
missense	-2	2R	6690735	G	A	FBgn0027499	wde-RA:p.Thr799Ile				0.77904	0.11765	0.238095	0.601168	0.00395049	0.0127357	0.268369
missense	-2	3R	16434391	C	T	FBgn0023097	bon-RB:p.[Thr699Ile]; bon-RA:p.[Thr707Ile]				0.374693	0	0	0.374693	0.0285489	0.0285063	0.461048
missense	-2	2L	7718212	G	A	FBgn0031935	CG13793-RB:p.Ala281Val				0.83844	0.247865	0	0.714508	0.011839	0.00121762	0.222038
missense	-2	2L	6938968	CG	AA	FBgn0031869	CG18304-RB:p.[Thr298Ile]; CG18304-RA:p.[Thr292Ile]				0.57126	0	0	0.57126	0.00202002	0.00202445	0.1735
missense	-2	2L	6938855	C	A	FBgn0031869	CG18304-RB:p.[Ser336Ile]; CG18304-RA:p.[Ser330Ile]				0.659867	0	0	0.659867	0.000937582	0.000937977	0.689314
missense	-2	2L	2740788	G	A	FBgn0031450	Hrs-RD:p.Gly129Arg				0.573297	0	0	0.573297	2.41e-05	2.41e-05	0.78887
missense	-2	3L	22285586	A	G	FBgn0027086	Aats-ile-RA:p.[Glu1148Gly]; Aats-ile-RC:p.[Glu1148Gly]; Aats-ile-RD:p.[Glu1148Gly]				0.797263	0.199107	0.240237	0.577592	0.0187404	0.0242971	0.765765
missense	-2	2L	2421833	C	T	FBgn0031428	CG9886-RA:p.Ala313Val				0.828947	0	0	0.828947	0.000636536	0.000635786	0.0919489
missense	-2	3L	834300	C	G	FBgn0260755	CG42553-RA:p.Arg42Gly				0.3198	1	1	-0.6802	0.00697317	0.00695949	0.205223
missense	-2	3L	11126385	G	T	FBgn0260795	CG42575-RA:p.Arg453Leu				0.805557	0.208335	0.23372	0.584529	0.00582887	0.00646611	0.333018
missense	-2	X	6725862	T	C	FBgn0263968	CG12796-RA:p.Met255Val				1	0	0.3	0.85	9.03e-15	0.000847346	0.372675
missense	-2	3R	19604749	A	G	FBgn0039120	Nup98-RA:p.[Ile693Thr]; Nup98-RC:p.[Ile693Thr]				0	0.650827	0.343257	-0.497042	0.00274363	0.0129955	0.0728983
missense	-2	2L	18448475	G	A	FBgn0086707	ncm-RA:p.Thr127Ile				0.136097	0	0	0.136097	0.00158929	0.00159016	0.93771
missense	-2	2L	18448562	G	A	FBgn0086707	ncm-RA:p.Ser98Phe				0.199987	0	0	0.199987	0.00343884	0.00342266	0.192726
missense	-2	2L	18448598	G	A	FBgn0086707	ncm-RA:p.Ala86Val				0.221287	0	0	0.221287	3.24e-05	3.24e-05	0.700259
missense	-2	2L	3069718	G	A	FBgn0015600	toc-RF:p.[Ala682Val]; toc-RB:p.[Ala993Val]; toc-RC:p.[Ala888Val]; toc-RE:p.[Ala945Val]; toc-RD:p.[Ala984Val]; toc-RA:p.[Ala2162Val]				0.52759	0	0	0.52759	0.00389905	0.00390116	0.759942
missense	-2	2L	3124021	A	G	FBgn0015600	toc-RA:p.Val1212Ala				0.722873	0	0	0.722873	0.00208895	0.00209119	0.402379
missense	-2	2L	3125144	T	C	FBgn0015600	toc-RA:p.Met886Val				0.154023	0	0	0.154023	0.0124376	0.0124312	0.932659
missense	-2	3R	25894059	C	T	FBgn0015542	sima-RB:p.[Ser345Leu]; sima-RA:p.[Ser345Leu]				1	0.289585	0.221863	0.744276	0.0011639	4.17e-05	0.796643
missense	-2	2L	8160327	T	C	FBgn0261064	Rbsn-5-RA:p.Val79Ala				1	0.33193	0.638307	0.514882	8.39e-06	0.0498828	0.0810725
missense	-2	3L	15568539	C	T	FBgn0036511	CG6498-RA:p.Thr2057Ile				0	0.57527	0.43945	-0.50736	0.00309269	0.000571316	0.246228
missense	-2	3R	7895492	A	G	FBgn0037989	CG14741-RD:p.[Val1435Ala]; CG14741-RB:p.[Val1665Ala]; CG14741-RE:p.[Val1651Ala]; CG14741-RC:p.[Val1486Ala]				0.827777	0.242063	0.21228	0.600605	0.00461039	0.00408352	0.351179
missense	-2	3R	7898173	A	G	FBgn0037989	CG14741-RD:p.[Leu923Ser]; CG14741-RB:p.[Leu1153Ser]; CG14741-RE:p.[Leu1153Ser]; CG14741-RC:p.[Leu974Ser]				0	0.527777	0.66414	-0.595958	0.0196856	0.00270109	0.473315
missense	-2	2R	14683247	A	G	FBgn0034392	CG15094-RB:p.[Val154Ala]; CG15094-RA:p.[Val208Ala]				0	0.532583	0.775723	-0.654153	0.0363058	0.000291868	0.255818
missense	-2	3R	4563978	G	A	FBgn0037623	CG9801-RA:p.[Ala196Val]; CG9801-RB:p.[Ala196Val]; CG9801-RC:p.[Ala196Val]				0.50349	0	0	0.50349	0.0465715	0.0465379	0.686286
missense	-2	2L	6396597	C	T	FBgn0259714	CG42369-RA:p.Gly166Glu				1	0.23077	0	0.884615	0.000277497	1.74e-14	0.372288
missense	-2	3R	2730120	T	G	FBgn0260642	CG43252-RA:p.His59Pro				0.447187	0	0	0.447187	0.0407128	0.0406834	0.743099
missense	-2	2L	6897591	C	T	FBgn0031866	neuroligin-RA:p.[Ala55Val]; neuroligin-RB:p.[Ala55Val]				1	0.423915	0	0.788042	0.00833775	7.85e-14	0.128673
missense	-2	3L	21251240	A	G	FBgn0004865	CG43218-RA:p.Tyr12Cys				0.596737	0.934523	1	-0.370525	0.0466007	0.023405	0.144255
missense	-2	3R	18039879	C	T	FBgn0051163	Gld2-RB:p.Ala623Val				0.190277	0	0	0.190277	0.00492184	0.00492824	0.700599
missense	-2	3L	17029675	G	A	FBgn0036691	beg-RA:p.Val293Met				0.80302	0	0.169855	0.718093	0.000726747	0.0025815	0.117596
missense	-2	2L	7644464	G	A	FBgn0264087	CG13792-RA:p.Thr462Ile				0	0.338307	0.501867	-0.420087	0.00559091	5.02e-06	0.0630445
missense	-2	2L	4192735	G	A	FBgn0031589	CG3714-RB:p.[Thr383Ile]; CG3714-RC:p.[Thr383Ile]; CG3714-RD:p.[Thr383Ile]; CG3714-RE:p.[Thr383Ile]; CG3714-RF:p.[Thr383Ile]				0.90609	0	0	0.90609	5.97e-05	5.97e-05	0.349672
missense	-2	2R	15112904	T	C	FBgn0263395	hppy-RA:p.[Val1035Ala]; hppy-RB:p.[Val764Ala]				0.731243	0	0	0.731243	0.00061032	0.00061114	0.444329
missense	-2	3L	15640666	C	T	FBgn0259236	comm3-RC:p.Val18Met				1	0.32414	0.22161	0.727125	0.00377939	0.000196946	0.970571
missense	-2	2R	9861177	A	G	FBgn0033889	CG6701-RB:p.[Phe1328Ser]; CG6701-RC:p.[Phe1328Ser]; CG6701-RD:p.[Phe1328Ser]				0	1	1	-1	5.59e-16	1.32e-14	0.260148
missense	-2	2R	9861847	C	G	FBgn0033889	CG6701-RB:p.[Gly1105Arg]; CG6701-RC:p.[Gly1105Arg]; CG6701-RD:p.[Gly1105Arg]				0.896297	0	0	0.896297	0.000102036	0.000101824	0.120852
missense	-2	2R	9864393	TC	CT	FBgn0033889	CG6701-RB:p.[Glu387Arg]; CG6701-RC:p.[Glu387Arg]; CG6701-RD:p.[Glu387Arg]				0.91975	0	0	0.91975	7.54e-05	7.53e-05	0.108438
missense	-2	2R	17086627	C	A	FBgn0034602	CG15658-RA:p.Ala341Asp				0.65707	0	0	0.65707	0.000235143	0.000235198	0.852203
missense	-2	X	16273750	G	A	FBgn0004598	Fur2-RD:p.[Val1253Met]; Fur2-RE:p.[Val1253Met]; Fur2-RF:p.[Val1253Met]; Fur2-RG:p.[Val1253Met]; Fur2-RA:p.[Val1256Met]; Fur2-RB:p.[Val1256Met]; Fur2-RC:p.[Val1256Met]; Fur2-RI:p.[Val1229Met]				1	0	0	1	1.05e-14	2.07e-17	0.109592
missense	-2	2L	3453995	TG	AA	FBgn0031536	Cog3-RA:p.Ala882Val				0.726827	0	0	0.726827	0.000101487	0.000101721	0.119856
missense	-2	3R	26651400	T	C	FBgn0027598	cindr-RC:p.[Ile761Thr]; cindr-RD:p.[Ile514Thr]; cindr-RB:p.[Ile416Thr]; cindr-RA:p.[Ile416Thr]				0.788383	0	0	0.788383	0.000464573	0.000464575	0.991555
missense	-2	X	12499957	A	T	FBgn0052654	Sec16-RD:p.Gln1781Leu				0.30238	0.18182	0.18182	0.12056	0.0238027	0.023746	0.999154
missense	-2	3L	4514319	G	A	FBgn0014073	Tie-RA:p.Ser459Leu				0.987653	0	0	0.987653	1.37e-07	1.37e-07	0.949829
missense	-2	3L	4513295	CAT	GTG	FBgn0014073	Tie-RA:p.Met800His				0.206267	0	0	0.206267	0.0105888	0.0105793	0.775697
missense	-2	2R	3832923	T	C	FBgn0033236	CG34431-RA:p.Val194Ala				1	0.40354	0.243195	0.676632	0.0263507	0.000547488	0.277649
missense	-2	2R	3839395	C	T	FBgn0033236	CG14764-RB:p.Cys99Tyr				0	0.598757	0.804903	-0.70183	0.0414631	7.38e-05	0.378215
missense	-2	2L	2711778	TG	CA	FBgn0051690	CG31690-RE:p.[Trp474Gln]; CG31690-RD:p.[Trp464Gln]				1	0.14286	0	0.92857	3.71e-05	2.52e-14	0.375379
missense	-2	2L	2711257	T	G	FBgn0051690	CG31690-RE:p.[Phe300Cys]; CG31690-RD:p.[Phe290Cys]				1	0	0	1	4.06e-15	8.39e-16	0.531479
missense	-2	3L	15004508	AC	GT	FBgn0036463	Reck-RA:p.Val38Thr				1	0.40625	0.39815	0.5978	0.00751901	0.0153442	0.981768
missense	-2	3L	7446116	T	C	FBgn0259935	CG42458-RA:p.Val519Ala				0	0.25931	0.52635	-0.39283	0.00769697	0.0311108	0.19085
missense	-2	3L	7445075	CA	TG	FBgn0259935	CG33278-RA:p.Ser356Leu				1	0.314655	0.611967	0.536689	0.00207473	0.0241709	0.061905
missense	-2	3L	18911321	C	T	FBgn0036831	CG6839-RA:p.Ser96Leu				0.77239	0.238095	0	0.653342	0.00330764	0.000104168	0.131929
missense	-2	3R	24441627	A	G	FBgn0039590	CG10011-RA:p.Val41Ala				0.28571	0.57381	0.423333	-0.212862	0.041084	0.0397443	0.345379
missense	-2	2L	5992149	G	A	FBgn0031759	lid-RA:p.[Ser1337Leu]; lid-RB:p.[Ser1337Leu]; lid-RC:p.[Ser1337Leu]; lid-RD:p.[Ser1337Leu]; lid-RE:p.[Ser1337Leu]				0.35661	0.16667	0.16667	0.18994	0.0243065	0.0242201	0.996537
missense	-2	2L	5992168	C	T	FBgn0031759	lid-RA:p.[Gly1331Arg]; lid-RB:p.[Gly1331Arg]; lid-RC:p.[Gly1331Arg]; lid-RD:p.[Gly1331Arg]; lid-RE:p.[Gly1331Arg]				0.392457	0.125	0.19408	0.232917	0.00669316	0.0473007	0.368884
missense	-2	2L	16609432	T	C	FBgn0259735	CG4631-RA:p.Leu648Ser				0.98148	0	0.233333	0.864813	7.88e-07	0.0011549	0.0574414
missense	-2	2L	16608691	G	A	FBgn0259735	CG4631-RA:p.Gly401Glu				0.1	0.78	0.667237	-0.623618	0.00786105	0.00872387	0.59328
missense	-2	2L	16597304	C	A	FBgn0259735	CG42389-RD:p.Ala637Asp				0.789317	0.305495	0.1875	0.542819	0.00627782	0.00087479	0.555316
missense	-2	2L	2846724	G	A	FBgn0031471	CG3117-RB:p.Ala135Val				0.898077	0.4375	0	0.679327	0.00891145	0.000122804	0.373132
missense	-2	3L	5528626	G	A	FBgn0035611	CG13285-RB:p.[Ala21Val]; CG13285-RA:p.[Ala21Val]				0	0.90705	1	-0.953525	4.3e-05	4.44e-15	0.119233
missense	-2	2R	10083123	C	A	FBgn0050069	CG30069-RA:p.Pro3148His				0.16374	0.885157	0.738097	-0.647887	0.00199977	0.00563498	0.321072
missense	-2	3R	26984393	T	C	FBgn0013973	stops-RB:p.[Met366Val]; stops-RC:p.[Met366Val]; stops-RA:p.[Met442Val]				0.814693	0.093075	0	0.768156	0.000777672	0.000423157	0.116658
missense	-2	2L	8343548	T	C	FBgn0032024	CG14273-RA:p.Phe76Ser				1	0.693653	0.665447	0.32045	2.82e-05	0.000308775	0.432622
missense	-2	2L	8343512	C	T	FBgn0032024	CG14273-RA:p.Ala64Val				1	0.614817	0.698867	0.343158	0.0129568	0.00574987	0.472404
missense	-2	3L	11210134	T	C	FBgn0261553	CG42671-RB:p.[Val69Ala]; CG42671-RC:p.[Val69Ala]; CG42671-RE:p.[Val69Ala]; CG42671-RG:p.[Val69Ala]; CG42671-RH:p.[Val69Ala]; CG42671-RD:p.[Val69Ala]; CG42671-RF:p.[Val69Ala]				0.2381	1	0.913043	-0.718422	0.000313247	0.00209121	0.376773
missense	-2	2R	18181916	G	A	FBgn0034717	CG5819-RA:p.[Gly162Glu]; CG5819-RB:p.[Gly162Glu]				1	0.16667	0	0.916665	6.96e-05	3.03e-14	0.375831
missense	-2	3L	1007550	C	A	FBgn0024277	trio-RB:p.[Cys40Phe]; trio-RF:p.[Cys40Phe]				0.706213	0	0	0.706213	8.52e-07	8.5e-07	0.110415
missense	-2	3R	4193660	T	C	FBgn0263416	CG42285-RA:p.Met263Val				0.597117	0.18182	0	0.506207	0.016761	0.0079223	0.370654
missense	-2	3L	11065848	C	T	FBgn0263241	Mocs1-RC:p.[Thr430Ile]; Mocs1-RB:p.[Thr19Ile]				0.617063	0.13043	0	0.551848	0.000257162	4.07e-06	0.376266
missense	-2	2R	9310519	G	A	FBgn0259221	CG30060-RA:p.Ser197Leu				0.655357	0	0	0.655357	0.0105283	0.0105089	0.146473
missense	-2	2R	17197308	G	T	FBgn0261554	CG42672-RM:p.[Ser1460Ile]; CG42672-RJ:p.[Ser1408Ile]; CG42672-RH:p.[Ser1558Ile]; CG42672-RD:p.[Ser1386Ile]				1	0	0	1	5.61e-15	1.4e-14	0.326565
missense	-2	2L	331027	T	C	FBgn0004611	CG31921-RA:p.Glu369Gly				1	0.28788	0.15922	0.77645	0.000313776	9.31e-07	0.111865
missense	-2	2L	325884	G	A	FBgn0004611	CG31920-RB:p.Ala404Val				0.424767	0.15385	0	0.347842	0.0356671	0.0173175	0.376762
missense	-2	3L	20132902	C	T	FBgn0036942	CG7328-RA:p.Gly161Glu				0	0.942857	0.759257	-0.851057	5.88e-06	0.00189132	0.166295
missense	-2	2R	19639479	G	T	FBgn0034901	CG11300-RA:p.Cys3Phe				1	0	0	1	8.9e-15	4.91e-16	0.436539
missense	-2	2L	7475771	A	G	FBgn0260486	CG6441-RC:p.[Arg289Gly]; CG6441-RA:p.[Arg289Gly]				1	0.55577	0.75268	0.345775	0.0309996	0.000482617	0.120625
missense	-2	3R	8245778	T	C	FBgn0082831	pps-RA:p.[Ile1797Thr]; pps-RB:p.[Ile1799Thr]				1	0.39412	0.238687	0.683597	0.0129586	1.79e-08	0.895557
missense	-2	2L	5189555	C	T	FBgn0261836	Msp-300-RH:p.[Thr8484Ile]; Msp-300-RI:p.[Thr8484Ile]; Msp-300-RD:p.[Thr8843Ile]; Msp-300-RG:p.[Thr10038Ile]				0.867657	0.289217	0.411765	0.517166	0.00379166	0.0272772	0.943156
missense	-2	2L	5181055	A	C	FBgn0261836	Msp-300-RE:p.[His7905Pro]; Msp-300-RG:p.[His7905Pro]				0	0.36574	0.3123	-0.33902	2.52e-05	0.010998	0.498506
missense	-2	3L	16893544	T	C	FBgn0261565	Lmpt-RK:p.[Val131Ala]; Lmpt-RL:p.[Val131Ala]; Lmpt-RJ:p.[Val131Ala]				0	0.933763	0.880393	-0.907078	1.1e-05	0.0006548	0.614376
missense	-2	3L	16872114	C	T	FBgn0261565	CG32170-RA:p.Thr519Ile				1	0.3125	0.260907	0.713297	0.00100601	0.000709907	0.295767
missense	-2	3R	19806461	C	T	FBgn0051140	CG31140-RD:p.[Ala1544Val]; CG31140-RF:p.[Ala1015Val]				0.87436	0.34804	0	0.70034	0.0234958	0.000629642	0.211913
missense	-2	2R	4092776	G	T	FBgn0053087	CG14756-RA:p.Ala138Asp				0.36147	0	0	0.36147	0.0101049	0.0101114	0.698005
missense	-2	2L	218380	G	A	FBgn0086902	kis-RB:p.[Thr215Ile]; kis-RE:p.[Thr3316Ile]; kis-RC:p.[Thr3581Ile]; kis-RF:p.[Thr3255Ile]; kis-RA:p.[Thr3386Ile]; kis-RD:p.[Thr3407Ile]				1	0.309827	0.5	0.595087	2.15e-05	0.00746498	0.446233
missense	-2	2L	4407097	T	C	FBgn0031602	CG15431-RA:p.Met705Val				0	0.41041	0.62218	-0.516295	0.0497869	0.00150101	0.276394
missense	-2	2R	19594825	C	A	FBgn0011297	l(2)tid-RA:p.[Pro50His]; l(2)tid-RC:p.[Pro50His]; l(2)tid-RD:p.[Pro50His]; l(2)tid-RB:p.[Pro50His]				0.42094	0	0	0.42094	0.000701505	0.000701629	0.930998
missense	-2	2L	8248110	A	T	FBgn0032010	CG8086-RF:p.[Tyr938Asn]; CG8086-RE:p.[Tyr938Asn]; CG8086-RG:p.[Tyr973Asn]; CG8086-RH:p.[Tyr972Asn]				1	0	0.394735	0.802632	1.71e-14	0.00512895	0.117823
missense	-2	2L	8245073	T	G	FBgn0032010	CG8086-RF:p.[Tyr1571Ser]; CG8086-RA:p.[Tyr190Ser]; CG8086-RB:p.[Tyr216Ser]; CG8086-RE:p.[Tyr1571Ser]				1	0	0.23	0.885	4e-14	0.00061108	0.15149
missense	-2	2L	12000042	C	T	FBgn0032393	CG12264-RA:p.Thr87Ile				0.446457	0	0	0.446457	0.00761171	0.00762091	0.624391
missense	-2	3R	3633332	A	G	FBgn0037521	CG2993-RA:p.Ile209Thr				1	0.42105	0.462303	0.558323	0.00359971	0.0204641	0.18475
missense	-2	3L	20736108	A	G	FBgn0037016	CG13252-RA:p.Arg169Gly				0.330437	0.958333	0.81309	-0.555275	0.00137916	0.0149268	0.24065
missense	-2	3R	10577782	A	G	FBgn0263929	CG7362-RA:p.Val883Ala				0.94494	0	0	0.94494	4.83e-06	4.83e-06	0.349028
missense	-2	2L	12389575	C	T	FBgn0262475	bru-2-RA:p.[Ala569Val]; bru-2-RC:p.[Ala569Val]; bru-2-RG:p.[Ala569Val]; bru-2-RD:p.[Ala569Val]; bru-2-RE:p.[Ala569Val]; bru-2-RH:p.[Ala327Val]; bru-2-RJ:p.[Ala327Val]; bru-2-RI:p.[Ala182Val]				0.51317	0	0	0.51317	0.0152434	0.0152468	0.92126
missense	-2	2R	13638403	T	G	FBgn0034275	CG5002-RA:p.Leu48Trp				0.669473	0	0	0.669473	0.00711382	0.0071128	0.904201
missense	-2	2R	6680173	G	A	FBgn0053144	mthl13-RD:p.Cys315Tyr				0.777307	0.129165	0.298245	0.563602	0.00307362	0.0151144	0.362981
missense	-2	2R	6679712	A	C	FBgn0053144	mthl13-RD:p.Asp210Ala				0.787963	0	0	0.787963	0.00110786	0.00110791	0.963633
missense	-2	2R	6642709	G	T	FBgn0053144	CG33144-RA:p.[Pro707His]; CG33144-RB:p.[Pro707His]				0.74293	0	0	0.74293	0.00327791	0.00327079	0.200654
missense	-2	2R	6642958	G	A	FBgn0053144	CG33144-RA:p.[Ala624Val]; CG33144-RB:p.[Ala624Val]				0.815697	0	0	0.815697	0.000463738	0.000463906	0.664827
missense	-2	X	8988316	C	A	FBgn0030087	CG7766-RD:p.[Cys1215Phe]; CG7766-RB:p.[Cys1236Phe]; CG7766-RA:p.[Cys1235Phe]; CG7766-RC:p.[Cys1293Phe]				0.27456	0	0	0.27456	0.00973604	0.00973893	0.92651
missense	-2	X	13308521	G	A	FBgn0030486	Set2-RA:p.[Gly341Glu]; Set2-RB:p.[Gly341Glu]				1	0	0	1	4.17e-14	1.52e-15	0.706576
missense	-2	2R	12475547	C	T	FBgn0034141	CG8311-RA:p.Val286Met				0.30855	0	0.12	0.24855	0.00509756	0.0171062	0.373655
missense	-2	2L	1014303	C	T	FBgn0031294	IA-2-RD:p.[Val1191Met]; IA-2-RC:p.[Val1204Met]				0.758763	1	1	-0.241237	0.0199707	0.019995	0.698309
missense	-2	3R	23743622	C	T	FBgn0039555	mRpS22-RA:p.Ala300Val				1	0	0.17857	0.910715	2.22e-15	9.41e-05	0.371016
missense	-2	3L	16976530	C	T	FBgn0261547	Exn-RD:p.[Ser917Phe]; Exn-RE:p.[Ser917Phe]				0.24032	0	0	0.24032	9.73e-05	9.75e-05	0.665496
missense	-2	2R	487115	A	G	FBgn0260799	p120ctn-RA:p.[Glu126Gly]; p120ctn-RB:p.[Glu112Gly]				0.9125	0	0	0.9125	2.46e-06	2.46e-06	0.464897
missense	-2	2R	14591777	C	T	FBgn0262103	CG42856-RB:p.[Ser1298Phe]; CG42856-RC:p.[Ser1298Phe]				0.53356	0	0	0.53356	0.00362646	0.00362727	0.903875
missense	-2	3L	22885121	CC	AA	FBgn0037203	slif-RA:p.[Pro219Asn]; slif-RB:p.[Pro219Asn]; slif-RC:p.[Pro219Asn]				1	0.243213	0.19091	0.782938	4.28e-05	0.000163794	0.194662
missense	-2	3R	18591229	T	A	FBgn0039026	CG4721-RA:p.Gln199Leu				0.68189	0	0	0.68189	0.000325325	0.000324765	0.195979
missense	-2	3R	18597232	A	G	FBgn0039026	CG43095-RA:p.Val67Ala				0.366137	0	0	0.366137	0.0174745	0.0174742	1
missense	-2	3R	18596434	A	T	FBgn0039026	CG43094-RA:p.Tyr66Asn				0.58778	1	1	-0.41222	0.00861652	0.00864619	0.166157
missense	-2	3R	18594043	A	G	FBgn0039026	CG43091-RA:p.Val110Ala				0.47203	0	0	0.47203	0.000164734	0.000164616	0.739541
missense	-2	3R	18593294	T	C	FBgn0039026	CG13841-RA:p.Met10Val				0.633143	0	0	0.633143	0.00131855	0.00131977	0.575352
missense	-2	3L	17332189	C	A	FBgn0036710	CG6479-RB:p.[Ser8Ile]; CG6479-RA:p.[Ser12Ile]				0.449717	0.09524	0	0.402097	0.0105863	0.00656728	0.372768
missense	-2	2R	3555351	G	A	FBgn0033206	CG12042-RA:p.Thr367Ile				0.235713	0	0	0.235713	0.0340799	0.0340845	0.973914
missense	-2	3L	2484677	C	T	FBgn0035347	CG33232-RA:p.Ala56Val				0.83889	0	0	0.83889	0.00232635	0.0023259	0.853422
missense	-2	2L	21640819	T	C	FBgn0023416	Ac3-RA:p.Val722Ala				0.982457	0.30769	0.262593	0.697315	0.00107297	0.00024413	0.242309
missense	-2	2L	4188536	C	T	FBgn0040102	lectin-24Db-RA:p.Ala130Val				0	0.539683	0.412933	-0.476308	0.0131272	0.0483543	0.548648
missense	-2	3R	19189203	C	A	FBgn0039073	CG4408-RA:p.Gly32Trp				0.578373	0	0	0.578373	0.00147735	0.00147542	0.521347
missense	-2	3R	19189283	T	A	FBgn0039073	CG4408-RA:p.Gln5Leu				0.662397	0	0	0.662397	1.07e-08	1.07e-08	0.895548
missense	-2	3L	9447183	G	A	FBgn0035997	phol-RA:p.Ala486Val				0	0.53492	1	-0.76746	0.0436476	5.7e-14	0.0646784
missense	-2	2R	13378746	A	T	FBgn0050104	CG30104-RA:p.[Gln84Leu]; CG30104-RB:p.[Gln84Leu]				0.901077	0.432745	0.13636	0.616524	0.0168906	0.000307091	0.183638
missense	-2	2L	4098195	C	T	FBgn0000547	ed-RA:p.Ala366Val				1	0.13636	0	0.93182	3.06e-05	9.93e-15	0.376661
missense	-2	3L	1326229	TG	CT	FBgn0010246	Myo61F-RD:p.[Val78Ala]; Myo61F-RA:p.[Val61Ala]; Myo61F-RB:p.[Val52Ala]; Myo61F-RC:p.[Val52Ala]				0.40898	0	0	0.40898	0.037464	0.0375226	0.2302
missense	-2	2L	18534116	A	G	FBgn0085370	Pde11-RB:p.[Val1192Ala]; Pde11-RC:p.[Val1148Ala]				0	0.560453	0.36607	-0.463262	0.0369641	0.00561701	0.373529
missense	-2	3L	19600537	C	T	FBgn0036891	CG9372-RA:p.Ala189Val				0	0.672223	0.736437	-0.70433	0.0174922	0.000290409	0.744476
missense	-2	3L	980431	T	C	FBgn0264574	Glut1-RH:p.Val304Ala				0	1	1	-1	2.1e-14	4.3e-14	0.833974
missense	-2	3L	990321	C	T	FBgn0264574	CG13908-RA:p.[Ala601Val]; CG13908-RB:p.[Ala601Val]				0.644443	1	1	-0.355557	0.0498993	0.0497691	0.262745
missense	-2	3L	7526618	T	C	FBgn0028582	lqf-RA:p.[Val34Ala]; lqf-RE:p.[Val34Ala]				1	0.7256	0.550507	0.361947	0.00268286	0.0352691	0.306354
missense	-2	3R	21083558	C	T	FBgn0039302	Nup358-RB:p.[Ser2502Leu]; Nup358-RA:p.[Ser2479Leu]				0.775177	0.175	0.314707	0.530323	0.0025508	0.00671028	0.0567188
missense	-2	3R	21077115	A	G	FBgn0039302	Nup358-RB:p.[Met415Val]; Nup358-RA:p.[Met415Val]				0	0.322763	0.356127	-0.339445	0.0441579	0.0341022	0.845212
missense	-2	3R	21077070	A	G	FBgn0039302	Nup358-RB:p.[Arg400Gly]; Nup358-RA:p.[Arg400Gly]				1	0.4042	0.38963	0.603085	0.0071701	0.00938746	0.938925
missense	-2	2R	12442136	T	C	FBgn0034135	Syn2-RE:p.Ile5Thr				1	0.596495	0.554167	0.424669	0.0412936	0.000105579	0.489141
missense	-2	2R	14524434	G	A	FBgn0050122	CG30122-RD:p.[Ala575Val]; CG30122-RB:p.[Ala575Val]; CG30122-RC:p.[Ala575Val]				1	0.444963	0.57462	0.490208	0.0431981	0.00865161	0.569819
missense	-2	2R	8112638	T	A	FBgn0033702	CG8854-RB:p.Gln251Leu				1	0	0	1	3.42e-14	1.31e-14	0.0903215
missense	-2	3R	17681397	G	T	FBgn0015229	glec-RA:p.Ala82Asp				0.411813	0.16667	0	0.328478	0.0298484	0.0112613	0.373736
missense	-2	3R	24937782	A	G	FBgn0039634	CG11874-RA:p.Val114Ala				1	0.4	0.34698	0.62651	0.00290032	9.78e-05	0.20141
missense	-2	2R	14171255	A	G	FBgn0010575	sbb-RD:p.[Val1222Ala]; sbb-RH:p.[Val1222Ala]; sbb-RG:p.[Val1232Ala]				1	0	0	1	2.5e-14	2.79e-14	0.134961
missense	-2	2L	8010297	A	T	FBgn0054010	CG34010-RA:p.Leu92Gln				0.526083	0	0	0.526083	0.00151747	0.0015199	0.292551
missense	-2	X	14844532	C	A	FBgn0027601	CG9009-RA:p.[Ser34Ile]; CG9009-RB:p.[Ser34Ile]				1	0	0	1	7.4e-15	2.37e-14	0.668138
missense	-2	2L	9503969	A	G	FBgn0032120	CG33298-RA:p.[Met60Val]; CG33298-RC:p.[Met60Val]; CG33298-RD:p.[Met60Val]; CG33298-RB:p.[Met60Val]				1	0.545455	0.198587	0.627979	0.0256968	0.000147152	0.439353
missense	-2	2R	13714703	T	C	FBgn0259211	grh-RJ:p.[Ile574Thr]; grh-RL:p.[Ile574Thr]				0.2875	0	0	0.2875	0.047337	0.0475166	0.17898
missense	-2	2R	10059833	T	G	FBgn0033906	CG8331-RA:p.[Trp61Gly]; CG8331-RD:p.[Trp61Gly]; CG8331-RB:p.[Trp43Gly]; CG8331-RC:p.[Trp36Gly]				0.146965	0.839743	0.8296	-0.687707	0.00158801	0.000277121	0.914778
missense	-2	3R	3828828	G	A	FBgn0037536	CG2698-RC:p.[Gly360Arg]; CG2698-RB:p.[Gly360Arg]; CG2698-RA:p.[Gly360Arg]; CG2698-RD:p.[Gly360Arg]				0.211677	0	0	0.211677	0.0264719	0.0266233	0.228199
missense	-2	2R	12088845	T	C	FBgn0015295	shark-RA:p.Met422Val				0	0.55	0.346153	-0.448077	4.42e-05	0.0259497	0.122877
missense	-2	3L	16260301	G	A	FBgn0036587	CG4950-RB:p.Ser314Leu				0.7292	0.352275	0.112395	0.496865	0.0413902	0.00389653	0.308195
missense	-2	2R	19850725	C	T	FBgn0034943	Fmo-1-RA:p.Ala48Val				1	0.700597	0.428845	0.435279	2.66e-06	0.0109286	0.0598994
missense	-2	2R	19850632	C	T	FBgn0034943	Fmo-1-RA:p.Ala17Val				0	0.42355	0.34993	-0.38674	0.00238172	0.00498253	0.451821
missense	-2	2L	7706510	CA	TC	FBgn0041181	TepIII-RA:p.Thr358Ile				0.75585	0.31579	0	0.597955	0.015857	0.00351959	0.374064
missense	-2	2R	11854641	G	A	FBgn0013988	Strn-Mlck-RO:p.[Ala5757Val]; Strn-Mlck-RL:p.[Ala5757Val]; Strn-Mlck-RQ:p.[Ala5757Val]; Strn-Mlck-RH:p.[Ala5757Val]; Strn-Mlck-RP:p.[Ala5757Val]				1	0.40278	0.36412	0.61655	0.000589817	0.000370801	0.666987
missense	-2	2R	11864476	G	A	FBgn0013988	Strn-Mlck-RO:p.[Ala2737Val]; Strn-Mlck-RK:p.[Ala2737Val]; Strn-Mlck-RL:p.[Ala2737Val]; Strn-Mlck-RQ:p.[Ala2737Val]; Strn-Mlck-RH:p.[Ala2737Val]; Strn-Mlck-RD:p.[Ala2737Val]; Strn-Mlck-RP:p.[Ala2737Val]				0.25017	0	0.11765	0.191345	0.000557036	0.0104384	0.377562
missense	-2	3L	11685120	G	A	FBgn0036193	CG14135-RB:p.Gly89Glu				0.08108	0.517193	0.768253	-0.561643	0.0159974	0.00246338	0.189924
missense	-2	2L	8310474	G	A	FBgn0032017	CG7810-RA:p.Ser217Phe				1	0.40975	0.525793	0.532228	0.00090019	0.00303834	0.308692
missense	-2	2L	19555917	C	T	FBgn0041180	TepIV-RA:p.Thr1359Ile				0.939273	0.353895	0.55846	0.483096	0.0159512	0.00113088	0.140553
missense	-2	3L	443076	T	C	FBgn0001316	klar-RD:p.Met1758Val				0.59127	1	1	-0.40873	0.000362777	0.000362785	1
missense	-2	2R	18951704	A	T	FBgn0034814	CG9890-RA:p.Leu14Gln				0.25893	0.857143	1	-0.669642	0.0114226	0.00162835	0.261287
missense	-2	3R	5832038	A	C	FBgn0053208	Mical-RE:p.[Ile1883Ser]; Mical-RB:p.[Ile2151Ser]; Mical-RC:p.[Ile3872Ser]; Mical-RD:p.[Ile3872Ser]; Mical-RF:p.[Ile3872Ser]; Mical-RG:p.[Ile3872Ser]; Mical-RH:p.[Ile3872Ser]; Mical-RJ:p.[Ile3892Ser]; Mical-RK:p.[Ile3892Ser]; Mical-RL:p.[Ile3892Ser]				0.33741	0.925923	0.79183	-0.521467	0.00805054	0.0303231	0.322973
missense	-2	3R	9137215	C	T	FBgn0052473	CG32473-RA:p.[Thr654Ile]; CG32473-RC:p.[Thr667Ile]; CG32473-RE:p.[Thr582Ile]; CG32473-RB:p.[Thr545Ile]; CG32473-RD:p.[Thr545Ile]				0.226283	0	0	0.226283	0.00361074	0.00360827	0.825715
missense	-2	3R	9137230	A	G	FBgn0052473	CG32473-RA:p.[Glu659Gly]; CG32473-RC:p.[Glu672Gly]; CG32473-RE:p.[Glu587Gly]; CG32473-RB:p.[Glu550Gly]; CG32473-RD:p.[Glu550Gly]				0.246903	0	0	0.246903	0.0110138	0.0109941	0.608959
missense	-2	3R	24711276	C	G	FBgn0053203	CG14526-RB:p.Pro621Arg				0.5354	0.12821	0.206295	0.368147	0.000435298	0.0053634	0.312767
missense	-2	3R	21904146	G	A	FBgn0039411	Dys-RC:p.[Val3448Met]; Dys-RB:p.[Val1993Met]; Dys-RD:p.[Val2178Met]				1	0.6	0.405593	0.497203	0.016098	0.00115574	0.38754
missense	-2	2L	13458018	A	C	FBgn0263354	CG42809-RA:p.Tyr128Ser				0	1	0.794117	-0.897058	4.44e-14	0.00625023	0.24394
missense	-2	3R	6131492	A	G	FBgn0262617	CG43143-RE:p.Glu1988Gly				1	0.278845	0.18899	0.766082	0.00100625	0.000158314	0.625295
missense	-2	2L	104670	T	C	FBgn0026787	Nhe1-RB:p.Met585Val				0	0.38617	0.41768	-0.401925	0.000568141	0.000543691	0.610022
missense	-2	2R	6414402	G	A	FBgn0005630	lola-RQ:p.Ser532Leu				0.169687	0	0	0.169687	0.00313355	0.00314917	0.465136
missense	-2	3L	216096	A	G	FBgn0035111	CG16940-RC:p.[Glu1041Gly]; CG16940-RA:p.[Glu1029Gly]; CG16940-RB:p.[Glu1029Gly]				0.6645	1	1	-0.3355	0.0323005	0.0322358	0.139873
missense	-2	3L	1647273	G	T	FBgn0035249	CG17249-RA:p.Ala43Asp				0.947473	0	0.30769	0.793628	3.9e-06	0.00134857	0.375243
missense	-2	2L	5955919	T	C	FBgn0031753	CG13999-RA:p.Met84Val				0.62351	0.11765	0	0.564685	0.00316093	0.00170319	0.372885
missense	-2	3L	12845586	G	A	FBgn0036318	CG11009-RA:p.Cys368Tyr				1	0.656563	0.40357	0.469933	0.0184824	0.00608872	0.0776375
missense	-2	3R	18538624	G	A	FBgn0051151	wge-RB:p.[Ser1085Leu]; wge-RA:p.[Ser1306Leu]; wge-RC:p.[Ser1421Leu]				0.901517	0	0	0.901517	0.000302414	0.000302154	0.466736
missense	-2	3R	18538813	A	G	FBgn0051151	wge-RB:p.[Leu1022Ser]; wge-RA:p.[Leu1243Ser]; wge-RC:p.[Leu1358Ser]				0	0.618573	0.731747	-0.67516	0.00067804	0.0351204	0.665856
missense	-2	3L	9339707	C	T	FBgn0035976	PGRP-LC-RG:p.[Ser340Phe]				1	0.333335	0.60606	0.530303	0.0027125	0.0205026	0.0728002
missense	-2	2R	5284250	C	T	FBgn0028473	CG8801-RA:p.Val565Met				0.184217	0	0	0.184217	0.00884263	0.00879561	0.197114
missense	-2	2R	16902523	C	T	FBgn0034572	CG9346-RA:p.Ser791Leu				0	1	0.913043	-0.956522	6.74e-15	0.000469343	0.377537
missense	-2	3R	15702074	T	C	FBgn0038741	CG17186-RA:p.Glu336Gly				0	0.6847	0.773737	-0.729218	0.00100223	0.000386458	0.448567
missense	-2	2R	9594153	C	T	FBgn0000633	fas-RA:p.Ala91Val				1	0.167835	0	0.916083	9.74e-05	2.41e-14	0.119529
missense	-2	2R	9580095	G	A	FBgn0000633	CG6220-RA:p.Ser229Phe				0.964913	0.31579	0	0.807018	0.00150709	1.06e-05	0.374152
missense	-2	2R	9556255	T	C	FBgn0000633	CG18368-RA:p.Val299Ala				0.528063	1	1	-0.471937	0.0220713	0.0220669	0.912725
missense	-2	2R	9556228	T	C	FBgn0000633	CG18368-RA:p.Phe290Ser				0.613883	1	1	-0.386117	0.0100514	0.0100157	0.0877531
missense	-2	2R	9557881	G	T	FBgn0000633	CG18368-RA:p.Cys841Phe				0.57857	1	1	-0.42143	0.00490617	0.0049069	0.954181
missense	-2	3R	20082350	G	A	FBgn0011225	jar-RB:p.[Ala567Val]; jar-RG:p.[Ala567Val]; jar-RJ:p.[Ala567Val]; jar-RK:p.[Ala567Val]; jar-RH:p.[Ala567Val]; jar-RI:p.[Ala567Val]				0.571223	0	0	0.571223	0.0308631	0.0308886	0.290688
missense	-2	X	13151940	G	A	FBgn0004456	CG15742-RB:p.[Ala43Val]; CG15742-RC:p.[Ala43Val]; CG15742-RA:p.[Ala110Val]				1	0	0	1	8.83e-15	2.39e-14	0.888549
missense	-2	3L	7721663	G	A	FBgn0052373	CG8492-RD:p.Thr1142Ile				1	0.30983	0.31739	0.68639	0.0021775	0.00331786	0.97734
missense	-2	3L	7715837	C	T	FBgn0052373	CG7457-RA:p.Gly1127Arg				0.984127	0	0	0.984127	4.08e-07	4.08e-07	0.635851
missense	-2	3L	7661407	G	A	FBgn0052373	Ank2-RU:p.Ser10916Leu				1	0.14286	0	0.92857	3.66e-05	2.64e-15	0.373427
missense	-2	3L	7686337	A	T	FBgn0052373	Ank2-RU:p.Leu2606Gln				1	0.176925	0	0.911538	0.000127514	2.46e-14	0.121972
missense	-2	3L	7675990	A	C	FBgn0052373	Ank2-RU:p.Ile6055Ser				0.11324	0	0	0.11324	0.0285183	0.0287842	0.370918
missense	-2	3L	7679405	T	A	FBgn0052373	Ank2-RU:p.Asn4917Tyr				0.541667	0.15	0	0.466667	0.000896142	2.29e-05	0.369668
missense	-2	3L	1338527	T	C	FBgn0010786	l(3)02640-RA:p.Val439Ala				0.711517	0	0.35714	0.532947	0.0108289	0.0401639	0.372231
missense	-2	3L	1338149	C	T	FBgn0010786	l(3)02640-RA:p.Ala313Val				0.616667	0	0	0.616667	0.0166422	0.0166287	0.397072
missense	-2	2L	5746575	C	T	FBgn0031736	CG11029-RA:p.Ala100Val				0.75824	0.37647	0.389423	0.375293	0.0246386	0.0265425	0.40863
missense	-2	2L	3453496	G	T	FBgn0031535	CG12795-RB:p.Ser221Ile				0	0.439043	0.44017	-0.439607	0.00782561	0.0193868	0.993374
missense	-2	2R	18051143	C	T	FBgn0000008	a-RA:p.[Ser240Leu]; a-RB:p.[Ser240Leu]; a-RC:p.[Ser240Leu]				0.65	0	0	0.65	0.0155315	0.0155653	0.0922967
missense	-2	3R	10397761	G	A	FBgn0038244	CG7987-RA:p.[Thr849Ile]; CG7987-RB:p.[Thr849Ile]				0.944443	0.2381	0.386955	0.631916	0.000873831	0.0212268	0.411019
missense	-2	3L	22734050	G	A	FBgn0010830	l(3)04053-RA:p.Ala76Val				0.829347	0.29231	0.16894	0.598722	0.0200294	0.00709179	0.831912
missense	-2	2R	18490091	A	G	FBgn0034742	CG4294-RC:p.[Val946Ala]; CG4294-RB:p.[Val946Ala]				0.84976	0	0	0.84976	0.000130597	0.000130596	1
missense	-2	2R	18489615	T	A	FBgn0034742	CG4294-RC:p.[Gln1084Leu]; CG4294-RB:p.[Gln1084Leu]				0.2197	0.786327	0.889857	-0.618392	0.0086816	0.00167052	0.444699
missense	-2	2L	19585098	AC	CT	FBgn0032814	CG10366-RA:p.Thr226Leu				0.821763	0.3	0.22222	0.560653	0.00350818	0.00145956	0.844145
missense	-2	2L	19584367	AT	GA	FBgn0032814	CG10366-RA:p.Met8Glu				0.977777	0.6875	0.525	0.371527	0.0313264	0.00740236	0.294284
missense	-2	3R	17001180	C	T	FBgn0264357	SNF4Agamma-RF:p.[Ala495Val]; SNF4Agamma-RR:p.[Ala495Val]; SNF4Agamma-RS:p.[Ala495Val]				0.568617	0	0.3125	0.412367	0.00686811	0.0378806	0.373462
missense	-2	3R	16989870	GT	AA	FBgn0264357	CG5810-RA:p.Gly120Glu				0.4041	0	0	0.4041	0.0146737	0.0147152	0.0568475
missense	-2	2R	6530981	A	G	FBgn0033539	Git-RA:p.Val413Ala				0.729903	0	0	0.729903	0.00156952	0.00156637	0.154446
missense	-2	2R	17426628	CA	TG	FBgn0003731	CG33226-RC:p.Leu57Ser				1	0	0	1	2.05e-14	6.21e-14	0.360917
missense	-2	2R	17426600	G	C	FBgn0003731	CG33226-RC:p.Arg67Gly				1	0.166265	0.083915	0.87491	0.000171657	4.73e-06	0.488295
missense	-2	2R	17425905	TG	CA	FBgn0003731	CG33226-RC:p.Ala243Val				1	0	0.125	0.9375	3.72e-15	2.15e-05	0.376217
missense	-2	2R	17425493	G	T	FBgn0003731	CG30287-RA:p.Ala5Asp				1	0	0	1	3.45e-14	2.66e-14	0.176781
missense	-2	2R	17427889	C	T	FBgn0003731	CG30283-RB:p.Gly64Arg				1	0	0	1	1.99e-14	9.75e-14	0.376491
missense	-2	2R	17427415	C	G	FBgn0003731	CG30283-RB:p.Gly166Arg				1	0	0	1	5.38e-15	2.96e-14	0.380553
missense	-2	3L	7597034	C	T	FBgn0035802	CG33275-RA:p.Thr379Ile				0.95238	0.19048	0	0.85714	0.000362903	3.68e-05	0.377394
missense	-2	3R	8785762	G	A	FBgn0040493	granny-smith-RD:p.[Ala93Val]; granny-smith-RE:p.[Ala93Val]; granny-smith-RB:p.[Ala118Val]				0.633333	0	0.22143	0.522618	0.000957687	0.0127166	0.163865
missense	-2	2LHet	20498	T	C	FBgn0039958	CG12567-RD:p.[Met327Val]; CG12567-RA:p.[Met341Val]; CG12567-RF:p.[Met333Val]				0.822223	0.33333	0.35632	0.477398	0.00369328	0.00941912	0.481815
missense	-2	2L	15255647	G	A	FBgn0027559	CG3975-RA:p.[Ala206Val]; CG3975-RB:p.[Ala206Val]				0.52849	0	0.19318	0.4319	0.0118182	0.0466122	0.149961
missense	-2	3L	20767496	T	C	FBgn0016696	Pitslre-RA:p.[Val223Ala]; Pitslre-RC:p.[Val223Ala]; Pitslre-RE:p.[Val49Ala]; Pitslre-RF:p.[Val49Ala]				0.71225	0	0	0.71225	0.0113868	0.0113797	0.553435
missense	-2	3L	683211	C	T	FBgn0035153	ebd1-RA:p.Gly534Glu				0.700857	0	0	0.700857	8.92e-05	8.94e-05	0.349937
missense	-2	2R	5487646	A	G	FBgn0033434	CG30340-RA:p.Val320Ala				0.3	0	0	0.3	0.0222182	0.022197	0.708781
missense	-2	3L	20430941	AA	GT	FBgn0036991	CG5872-RA:p.Glu421Gly				0.53412	0	0	0.53412	0.00913867	0.00912342	0.423866
missense	-2	3R	18741179	T	C	FBgn0017590	klg-RA:p.Ile17Thr				1	0.258825	0.7619	0.489637	0.00222059	0.0426079	0.786538
missense	-2	2R	1646697	G	A	FBgn0033038	CG7791-RA:p.Ala335Val				0.91629	0	0	0.91629	8.79e-05	8.77e-05	0.319597
missense	-2	3R	13845178	A	G	FBgn0000477	DNaseII-RA:p.Tyr15Cys				1	0.239777	0.10345	0.828387	0.000374063	9.55e-06	0.0554359
missense	-2	3L	854767	G	A	FBgn0035170	dpr20-RA:p.Ala202Val				0	1	0.90909	-0.954545	8.28e-15	0.000559614	0.375489
missense	-2	3R	19583245	G	A	FBgn0028475	Hrd3-RA:p.Thr39Ile				0	0.7326	0.38788	-0.56024	0.0116203	0.000663814	0.114058
missense	-2	3R	25745239	A	G	FBgn0003861	trp-RA:p.Val143Ala				1	0	0	1	2.25e-15	2.42e-14	0.76325
missense	-2	3R	25741665	G	A	FBgn0003861	trp-RA:p.Ser867Phe				1	0	0.140865	0.929567	4.6e-14	6.05e-05	0.142032
missense	-2	3R	25062055	T	C	FBgn0039656	CG11951-RA:p.Tyr531Cys				0	0.46889	0.417103	-0.442997	0.000336634	0.000462994	0.414605
missense	-2	3L	11772842	T	C	FBgn0015278	CG14131-RA:p.Val547Ala				0.238303	0	0	0.238303	0.0152425	0.015168	0.186437
missense	-2	3L	12485630	G	C	FBgn0036289	CG10657-RA:p.Pro227Arg				0.7454	0.285185	0	0.602808	0.0121938	0.000433698	0.15061
missense	-2	3L	12485699	G	A	FBgn0036289	CG10657-RA:p.Ala204Val				0.684347	0.27273	0	0.547982	0.0148137	0.00367419	0.374216
missense	-2	3R	25992064	G	A	FBgn0051030	CG31030-RB:p.[Ala7Val]; CG31030-RA:p.[Ala7Val]				0.705367	0	0	0.705367	0.00773615	0.00771347	0.052137
missense	-2	3L	2135212	G	A	FBgn0052311	zormin-RC:p.[Ala1273Val]; zormin-RA:p.[Ala1273Val]; zormin-RB:p.[Ala1273Val]; zormin-RD:p.[Ala1273Val]				0	0.82381	1	-0.911905	0.00310705	2.02e-14	0.244312
missense	-2	3L	1864741	G	A	FBgn0042712	HBS1-RA:p.Ser102Phe				0	0.67198	0.72164	-0.69681	0.00798363	0.000596645	0.764609
missense	-2	2R	9774295	G	A	FBgn0013733	shot-RH:p.Thr4040Ile				0.294037	0	0	0.294037	0.0377988	0.0376596	0.130406
missense	-2	2R	9776677	T	C	FBgn0013733	shot-RH:p.Glu3246Gly				0	1	1	-1	3.04e-14	6.55e-14	0.18669
missense	-2	2R	9776107	T	A	FBgn0013733	shot-RH:p.Gln3436Leu				1	0	0	1	2.1e-14	1.37e-14	0.51915
missense	-2	2R	9775801	G	T	FBgn0013733	shot-RH:p.Ala3538Asp				0.66111	0.25149	0	0.535365	0.0403628	0.00864947	0.139115
missense	-2	3L	21282436	A	C	FBgn0259785	pzg-RA:p.Asp947Ala				0.375	0.719327	1	-0.484663	0.0251446	0.00218761	0.072604
missense	-2	3L	17527649	G	A	FBgn0259174	Nedd4-RE:p.[Cys21Tyr]; Nedd4-RF:p.[Cys21Tyr]				0.591673	0.199605	0.14379	0.419976	0.00367474	0.00129122	0.679064
missense	-2	3L	352862	T	C	FBgn0261985	Ptpmeg-RG:p.[Leu174Ser]; Ptpmeg-RH:p.[Leu174Ser]; Ptpmeg-RI:p.[Leu174Ser]; Ptpmeg-RJ:p.[Leu174Ser]; Ptpmeg-RK:p.[Leu174Ser]				0.531723	1	1	-0.468277	0.0159738	0.0159243	0.140015
missense	-2	3L	4040681	C	T	FBgn0263832	Rcd5-RA:p.Ala18Val				0.97619	0.568543	0.419517	0.48216	0.0198896	0.0238629	0.470445
missense	-2	2R	7228912	A	G	FBgn0011554	etaTry-RA:p.Leu6Ser				0.869587	0	0	0.869587	2.21e-06	2.21e-06	0.573551
missense	-2	2L	22123310	G	A	FBgn0032974	CG3651-RA:p.Val469Met				0.85641	0.13333	0	0.789745	0.000665637	0.000289233	0.369885
missense	-2	3L	22869870	C	T	FBgn0044324	Chro-RA:p.[Gly368Glu]; Chro-RB:p.[Gly368Glu]; Chro-RC:p.[Gly368Glu]				0	0.495167	0.60343	-0.549298	0.00574233	0.00581411	0.498593
missense	-2	3L	13002043	G	T	FBgn0036331	CG14117-RD:p.Arg85Leu				1	0.46147	0	0.769265	0.0358936	2.47e-15	0.0562031
missense	-2	2R	11653324	G	A	FBgn0083919	Zasp52-RF:p.Ala1796Val				0.60043	0	0	0.60043	0.040095	0.040049	0.349154
missense	-2	2L	18156451	C	T	FBgn0032670	CG5783-RA:p.Ser106Phe				0.764343	0	0	0.764343	8.32e-10	8.31e-10	0.834469
missense	-2	2L	13241651	A	G	FBgn0032494	CG5945-RA:p.Glu250Gly				0.66539	0	0.4	0.46539	0.00592793	0.0434273	0.37388
missense	-2	2L	13240204	G	A	FBgn0032494	CG5945-RA:p.Cys3Tyr				0.140215	1	0.86207	-0.79082	4.33e-05	0.00622208	0.374093
missense	-2	2R	17205234	C	A	FBgn0034618	CG9485-RB:p.[Ala1114Asp]; CG9485-RC:p.[Ala1031Asp]; CG9485-RD:p.[Ala1048Asp]; CG9485-RA:p.[Ala1027Asp]; CG9485-RE:p.[Ala1027Asp]				1	0	0	1	8.14e-15	4.31e-14	0.393104
missense	-2	3L	15062917	G	A	FBgn0086690	cp309-RC:p.[Ala258Val]; cp309-RE:p.[Ala1871Val]; cp309-RD:p.[Ala1916Val]; cp309-RF:p.[Ala2044Val]				0.154693	0	0	0.154693	0.0298429	0.0298155	0.871987
missense	-2	2R	10057337	C	T	FBgn0033905	CG18324-RB:p.[Ser216Leu]; CG18324-RA:p.[Ser108Leu]				0.226005	0.923077	0.745013	-0.60804	0.00252981	0.011625	0.242633
missense	-2	2L	738523	G	A	FBgn0026438	Eaat2-RA:p.[Ala456Val]; Eaat2-RD:p.[Ala456Val]; Eaat2-RC:p.[Ala472Val]				0.51282	0	0	0.51282	0.000286041	0.000285864	0.825503
missense	-2	3L	10864872	T	C	FBgn0026160	tna-RC:p.[Val459Ala]; tna-RA:p.[Val408Ala]; tna-RB:p.[Val422Ala]; tna-RD:p.[Val382Ala]				0.59853	0.32051	0.23077	0.32289	0.0382624	0.00694557	0.357248
missense	-2	3L	10863050	T	C	FBgn0026160	tna-RB:p.Ile6Thr				0.579333	0	0.218255	0.470206	0.00125788	0.0131314	0.116495
missense	-2	3R	16643253	G	A	FBgn0038828	CG17270-RA:p.Ala73Val				0.491263	0	0	0.491263	0.000251911	0.000252471	0.294336
missense	-2	3L	2265549	G	A	FBgn0000543	ecd-RA:p.Ala76Val				0.36209	0.2	0	0.26209	0.0130471	5.12e-05	0.374312
missense	-2	3L	2084775	A	G	FBgn0086906	sls-RC:p.Val5597Ala				0.986667	0.410197	0.35714	0.602998	0.0280678	0.00194101	0.234167
missense	-2	3L	2043652	T	C	FBgn0086906	sls-RC:p.Tyr17302Cys				1	0	0	1	2.95e-14	9.53e-15	0.970384
missense	-2	3L	2057652	G	C	FBgn0086906	sls-RC:p.Pro13051Arg				1	0.312353	0.477777	0.604935	0.000106975	0.000201305	0.0519218
missense	-2	3L	2058411	A	G	FBgn0086906	sls-RC:p.Ile12798Thr				1	0.492257	0.211907	0.647918	0.0391143	0.000996116	0.216718
missense	-2	3L	2084131	C	G	FBgn0086906	sls-RC:p.Gly5812Arg				0	0.551773	0.746033	-0.648903	0.0160729	0.000198684	0.262577
missense	-2	2L	17406844	G	A	FBgn0020503	CLIP-190-RA:p.[Gly920Glu]; CLIP-190-RB:p.[Gly919Glu]; CLIP-190-RM:p.[Gly919Glu]; CLIP-190-RH:p.[Gly828Glu]; CLIP-190-RN:p.[Gly828Glu]; CLIP-190-RC:p.[Gly882Glu]; CLIP-190-RL:p.[Gly695Glu]				0.22236	1	0.778503	-0.666892	0.000730579	0.00776244	0.0674122
missense	-2	3R	25754562	A	G	FBgn0051202	CG31202-RA:p.Val515Ala				1	0.50741	0.799123	0.346733	0.0104366	0.0341803	0.0809163
missense	-2	3L	681755	G	A	FBgn0035152	CG3386-RA:p.Ala11Val				0.223215	0.759953	0.895723	-0.604623	0.0208715	0.00124469	0.435639
missense	-2	3R	20646114	C	T	FBgn0039229	Saf-B-RB:p.[Ala488Val]; Saf-B-RC:p.[Ala226Val]; Saf-B-RA:p.[Ala226Val]				0.34866	0	0	0.34866	0.00229472	0.00229301	0.633235
missense	-2	2R	11897010	C	T	FBgn0034063	CG8388-RA:p.Gly554Glu				1	0	0.25	0.875	2.33e-14	0.000979054	0.158531
missense	-2	2L	3050413	A	G	FBgn0042627	v(2)k05816-RA:p.Glu891Gly				0.475447	0	0	0.475447	2.18e-05	2.18e-05	0.301736
missense	-2	3R	20890860	C	A	FBgn0039269	veli-RC:p.Arg105Leu				1	0.65579	0.468967	0.437622	0.038418	0.0332487	0.405865
missense	-2	2L	21138186	T	A	FBgn0023388	Dap160-RD:p.[Gln908Leu]; Dap160-RE:p.[Gln905Leu]; Dap160-RF:p.[Gln905Leu]; Dap160-RC:p.[Gln911Leu]; Dap160-RA:p.[Gln912Leu]				0.860577	0	0	0.860577	0.000262591	0.000262485	0.736522
missense	-2	3R	22771813	A	G	FBgn0039462	CG14252-RA:p.Glu91Gly				0.12	0.73889	0.353863	-0.426377	0.00583918	0.0156525	0.0521887
missense	-2	2L	7691322	C	T	FBgn0031930	CG7025-RA:p.Gly375Arg				0.808333	0.183335	0	0.716666	0.0218456	0.00917792	0.190172
missense	-2	2R	15255925	T	C	FBgn0034438	CG9416-RA:p.Met609Val				0.772947	0.07407	0	0.735912	0.00299242	0.0024387	0.374443
missense	-2	2R	14357176	G	A	FBgn0028496	CG30116-RB:p.[Ser731Leu]; CG30116-RC:p.[Ser731Leu]; CG30116-RD:p.[Ser731Leu]; CG30116-RA:p.[Ser731Leu]				0.0952967	0	0	0.0952967	0.0011384	0.00113172	0.464353
missense	-2	2R	14363070	G	A	FBgn0028496	CG30116-RB:p.[Ser203Leu]; CG30116-RC:p.[Ser203Leu]; CG30116-RD:p.[Ser203Leu]; CG30116-RA:p.[Ser203Leu]				0.135967	0	0	0.135967	0.014064	0.0140846	0.679235
missense	-2	2R	14349671	A	T	FBgn0028496	CG30116-RB:p.[Leu1283Gln]; CG30116-RC:p.[Leu1283Gln]; CG30116-RD:p.[Leu1283Gln]; CG30116-RA:p.[Leu1283Gln]				0.30476	0	0	0.30476	0.0102062	0.01021	0.701433
missense	-2	2R	14357871	A	G	FBgn0028496	CG30116-RB:p.[Ile534Thr]; CG30116-RC:p.[Ile534Thr]; CG30116-RD:p.[Ile534Thr]; CG30116-RA:p.[Ile534Thr]				0.434987	0	0	0.434987	0.0055744	0.00557529	0.932029
missense	-2	3R	8485872	C	T	FBgn0038072	CG6225-RA:p.[Thr590Ile]; CG6225-RB:p.[Thr590Ile]				0.613857	0.33333	0	0.447192	0.0110218	3.71e-06	0.371277
missense	-2	3L	19607926	G	T	FBgn0260655	l(3)76BDm-RA:p.Ser1001Tyr				0.31277	0	0	0.31277	0.0241255	0.0240679	0.458628
missense	-2	3L	1202278	C	A	FBgn0264272	CG32335-RB:p.Arg202Leu				0.136747	0	0	0.136747	0.005333	0.0053711	0.321724
missense	-2	3R	10441685	C	A	FBgn0038246	CG14853-RA:p.[Pro39His]; CG14853-RB:p.[Pro39His]				0.90196	0.139425	0	0.832247	0.00175739	0.000778183	0.121
missense	-2	2L	8930148	C	T	FBgn0085427	CG34398-RJ:p.[Ser1563Phe]; CG34398-RI:p.[Ser1335Phe]; CG34398-RA:p.[Ser1563Phe]; CG34398-RH:p.[Ser1563Phe]; CG34398-RG:p.[Ser1390Phe]; CG34398-RC:p.[Ser1563Phe]; CG34398-RE:p.[Ser1563Phe]; CG34398-RF:p.[Ser1563Phe]				0.080125	0.863637	0.62873	-0.666058	0.00431477	0.00152887	0.199435
missense	-2	2L	8926888	C	T	FBgn0085427	CG34398-RJ:p.[Ala779Val]; CG34398-RI:p.[Ala779Val]; CG34398-RA:p.[Ala779Val]; CG34398-RH:p.[Ala779Val]; CG34398-RG:p.[Ala606Val]; CG34398-RC:p.[Ala779Val]; CG34398-RE:p.[Ala779Val]; CG34398-RF:p.[Ala779Val]				0	0.848483	0.659937	-0.75421	0.00498066	2.49e-05	0.288932
missense	-2	2L	8931274	CC	AT	FBgn0085427	CG34398-RI:p.[Ala1482Asp]; CG34398-RA:p.[Ala1710Asp]; CG34398-RH:p.[Ala1710Asp]; CG34398-RG:p.[Ala1537Asp]; CG34398-RC:p.[Ala1710Asp]; CG34398-RE:p.[Ala1710Asp]; CG34398-RF:p.[Ala1710Asp]				0.731817	0.14286	0.205265	0.557754	0.00928061	0.0179337	0.345158
missense	-2	3L	11791350	T	C	FBgn0004381	Klp68D-RA:p.Val730Ala				0.568347	0.224315	0	0.456189	0.0106962	0.000467869	0.118266
missense	-2	3L	11790984	CG	TA	FBgn0004381	Klp68D-RA:p.Ser608Leu				0.433333	0	0	0.433333	0.00105306	0.00105019	0.249662
missense	-2	2L	3620856	G	T	FBgn0015663	Dot-RA:p.Trp466Leu				0.938013	0	0	0.938013	1.74e-05	1.75e-05	0.218677
missense	-2	2L	5801444	G	T	FBgn0031739	CG14005-RA:p.Ala127Asp				1	0.475	0	0.7625	0.02898	8.63e-16	0.197267
missense	-2	3L	1662271	G	A	FBgn0035253	CG7971-RF:p.Ala151Val				0.159665	1	1	-0.840335	7.96e-05	7.96e-05	0.897815
missense	-2	3L	1657154	A	C	FBgn0035253	CG7971-RC:p.[Leu764Arg]; CG7971-RF:p.[Leu989Arg]; CG7971-RD:p.[Leu764Arg]; CG7971-RA:p.[Leu764Arg]				0.892047	0	0	0.892047	9.05e-05	9.05e-05	0.568033
missense	-2	3L	1657743	C	T	FBgn0035253	CG7971-RC:p.[Gly568Arg]; CG7971-RF:p.[Gly793Arg]; CG7971-RD:p.[Gly568Arg]; CG7971-RA:p.[Gly568Arg]				0.121325	1	1	-0.878675	2.22e-05	2.22e-05	0.747978
missense	-2	2R	4510042	C	T	FBgn0033313	Cirl-RG:p.[Ala1394Val]				0.466887	0	0	0.466887	0.000551956	0.000551168	0.455218
missense	-2	2R	18451812	A	C	FBgn0260866	dnr1-RA:p.Ile615Ser				0.215207	1	1	-0.784793	9.26e-05	9.28e-05	0.203251
missense	-2	2R	18453419	G	A	FBgn0260866	dnr1-RA:p.Ala288Val				0.227503	0	0	0.227503	0.0411314	0.0412666	0.251194
missense	-2	3L	9698505	C	T	FBgn0036032	CG16711-RB:p.[Ala212Val]; CG16711-RA:p.[Ala212Val]				1	0	0	1	5.27e-14	4.5e-14	0.799029
missense	-2	2R	19541223	T	C	FBgn0004795	retn-RB:p.[Val873Ala]; retn-RA:p.[Val868Ala]				1	0	0.251725	0.874138	1.03e-16	0.00225231	0.234016
missense	-2	2R	19541292	CT	TG	FBgn0004795	retn-RB:p.[Ala896Val]; retn-RA:p.[Ala891Val]				0.49378	0	0.17647	0.405545	0.0137318	0.0298376	0.372816
missense	-2	3L	9449875	A	G	FBgn0035999	CG3437-RB:p.Val253Ala				0	0.571093	1	-0.785547	0.0341998	8.27e-15	0.0765063
missense	-2	3R	6044102	T	C	FBgn0004575	Syn-RD:p.[Ile817Thr]; Syn-RF:p.[Ile757Thr]				1	0	0	1	3.01e-14	1.22e-14	0.322414
missense	-2	3R	9504033	A	G	FBgn0038167	lkb1-RA:p.[Glu379Gly]; lkb1-RB:p.[Glu379Gly]; lkb1-RC:p.[Glu379Gly]; lkb1-RD:p.[Glu379Gly]; lkb1-RE:p.[Glu379Gly]; lkb1-RF:p.[Glu379Gly]; lkb1-RH:p.[Glu379Gly]; lkb1-RI:p.[Glu379Gly]; lkb1-RJ:p.[Glu379Gly]				0.414813	0	0	0.414813	0.00055987	0.000559372	0.720601
missense	-2	2L	4330960	T	A	FBgn0028482	CG16857-RA:p.Leu525Gln				1	0.428575	0.70966	0.430883	0.0194565	0.026011	0.109783
missense	-2	2L	8411203	C	A	FBgn0014417	CG13397-RA:p.Ser88Ile				0	0.601567	0.546297	-0.573932	0.00478482	2.37e-05	0.638729
missense	-2	2L	20756716	A	G	FBgn0032883	CG9323-RA:p.Phe356Ser				0.723833	0	0	0.723833	0.0155644	0.0155522	0.561366
missense	-2	2R	13652954	G	A	FBgn0034277	CG6370-RA:p.Thr399Ile				0.703373	0	0	0.703373	0.000858105	0.000859457	0.281882
missense	-2	X	689767	T	C	FBgn0025621	CG16989-RA:p.Leu753Ser				1	0	0.35294	0.82353	6.67e-15	0.00169523	0.373336
missense	-2	3R	1687986	A	G	FBgn0037391	CG2017-RA:p.Leu5Ser				0.749253	0.3167	0.336507	0.42265	0.0181264	0.0474745	0.885148
missense	-2	3R	6236050	G	T	FBgn0024957	Irp-1B-RA:p.Ala420Asp				1	0.349675	0.3	0.675162	0.0131721	0.00141954	0.880037
missense	-2	2R	14339850	A	G	FBgn0034351	CG5190-RA:p.Arg324Gly				0.388887	0	0	0.388887	0.00219303	0.00219956	0.285405
missense	-2	3L	21424228	A	C	FBgn0037081	CG33288-RC:p.Asp515Ala				1	0.36012	0.230617	0.704632	0.00617438	0.000133333	0.383967
missense	-2	2R	1592102	C	T	FBgn0259978	vlc-RA:p.[Ala499Val]; vlc-RC:p.[Ala499Val]; vlc-RE:p.[Ala499Val]; vlc-RF:p.[Ala499Val]; vlc-RG:p.[Ala499Val]; vlc-RH:p.[Ala499Val]; vlc-RI:p.[Ala499Val]; vlc-RB:p.[Ala477Val]				0.759593	0	0	0.759593	0.00220339	0.00220765	0.22528
missense	-2	2L	6483766	C	T	FBgn0031820	DLP-RA:p.Thr612Ile				0.61933	0.25134	0.219907	0.383707	0.0349867	0.00239497	0.780588
missense	-2	2L	6483892	A	T	FBgn0031820	DLP-RA:p.Gln654Leu				0.88889	0.13043	0.18889	0.72923	0.00210215	0.00447472	0.0896455
missense	-2	2R	11296529	C	G	FBgn0263980	Mtk-RA:p.Pro50Arg				1	0	0.210145	0.894927	3.31e-14	0.000997592	0.23366
missense	-2	3R	21301992	A	G	FBgn0039336	CG4553-RA:p.Ile195Thr				0.86633	0.35714	0.491317	0.442102	0.00545315	0.0378775	0.0771629
missense	-2	3R	20496270	G	A	FBgn0003429	CG42720-RA:p.Cys42Tyr				0.55263	1	0.964287	-0.429513	0.0010386	0.00291566	0.372062
missense	-2	3R	11370760	G	A	FBgn0038349	CG6045-RA:p.Ser572Phe				0.41228	0	0	0.41228	0.000199685	0.000199562	0.788118
missense	-2	X	6994527	T	C	FBgn0029935	CG4615-RA:p.Glu10Gly				0.424703	0	0	0.424703	0.0217096	0.0216969	0.600007
missense	-2	2R	17100546	A	G	FBgn0027073	CG4302-RA:p.Val509Ala				1	0	0	1	1.08e-14	1.41e-14	0.198535
missense	-2	2R	17100519	G	A	FBgn0027073	CG4302-RA:p.Ser518Phe				1	0	0	1	5.05e-16	1.29e-15	0.0860848
missense	-2	3L	20992627	A	G	FBgn0003415	skd-RC:p.[Val1406Ala]; skd-RD:p.[Val1406Ala]; skd-RE:p.[Val1556Ala]				0.44048	0.933333	0.958333	-0.505353	0.0367069	0.0295876	0.767066
missense	-2	3R	18924043	C	T	FBgn0039054	CG6733-RA:p.Ala169Val				0.305555	0.944443	1	-0.666667	0.00625634	0.00355217	0.374304
missense	-2	3R	16831196	CT	TC	FBgn0013995	CG10827-RA:p.Glu448Gly				0.404273	0	0	0.404273	0.00031176	0.000310976	0.483621
missense	-2	3R	16670041	G	T	FBgn0038832	CG15695-RA:p.Ser623Ile				0.539683	0.16667	0.26498	0.323858	0.0031178	0.0432063	0.389876
missense	-2	3R	16669043	C	A	FBgn0038832	CG15695-RA:p.Pro313His				0.35356	0	0	0.35356	0.0207328	0.0206329	0.0588053
missense	-2	3R	20487179	G	A	FBgn0020018	Ppox-RA:p.Ala90Val				0	0.721007	0.73077	-0.725888	0.000640358	0.00741721	0.954606
missense	-2	2L	14031137	T	A	FBgn0028872	CG18095-RB:p.[Gln133Leu]; CG18095-RA:p.[Gln133Leu]				0	0.85238	1	-0.92619	0.000598382	1.15e-14	0.16315
missense	-2	3R	9522719	T	C	FBgn0028487	f-cup-RD:p.[Tyr308Cys]				0.458773	0.764127	0.744227	-0.295403	0.0153972	0.046341	0.848912
missense	-2	3R	9523303	C	A	FBgn0028487	f-cup-RD:p.[Arg154Leu]				0.37144	0	0	0.37144	0.0114335	0.0114088	0.385662
missense	-2	2R	12354660	G	A	FBgn0261292	CheB53a-RA:p.Val124Met				1	0.564905	0.82738	0.303858	0.0367865	0.0114465	0.0935907
missense	-2	2R	12354244	GT	AC	FBgn0261292	CheB53a-RA:p.Val11Thr				1	0.258695	0.19048	0.775413	0.000764918	0.000123643	0.37849
missense	-2	3R	25769446	C	T	FBgn0039727	CG15523-RA:p.Ser2361Phe				1	0	0	1	7.02e-15	5.08e-14	0.742742
missense	-2	3L	20336846	G	C	FBgn0036970	Spn77Bc-RA:p.Arg292Pro				1	0.261907	0.45106	0.643517	0.000912613	0.0199703	0.86035
missense	-2	3L	20335959	C	A	FBgn0036970	Spn77Bc-RA:p.Ala41Asp				0.474213	0.285	0.256917	0.203255	0.0365176	0.0123278	0.558141
missense	-2	3R	26953849	C	A	FBgn0039821	CG15556-RA:p.Cys722Phe				0.8798	0.20202	0.0916667	0.732957	0.00142989	0.000322221	0.57266
missense	-2	3R	6241642	C	T	FBgn0037816	CG6345-RA:p.Gly22Glu				1	0	0.18219	0.908905	8.72e-14	0.00015313	0.126289
missense	-2	2L	5097224	AT	CC	FBgn0031683	CG4230-RA:p.Asp80Ala				1	0.30769	0	0.846155	0.000941094	1.89e-14	0.374251
missense	-2	3R	6223691	C	T	FBgn0259938	cwo-RA:p.[Ala243Val]; cwo-RB:p.[Ala166Val]; cwo-RC:p.[Ala166Val]				1	0	0.27273	0.863635	3.35e-14	0.000563718	0.372544
missense	-2	2R	7226030	T	C	FBgn0043471	kappaTry-RB:p.Met85Val				1	0	0	1	1.71e-15	2.73e-14	0.333772
missense	-2	3L	22465876	A	G	FBgn0037166	CG11426-RA:p.Met187Val				1	0.258335	0.39701	0.672327	0.000659732	0.0002096	0.0841032
missense	-2	2R	19491389	G	A	FBgn0034883	CG17664-RA:p.Thr256Ile				0	0.833333	0.700793	-0.767063	0.00750249	0.0279617	0.644434
missense	-2	2R	17154131	A	G	FBgn0085426	CG30393-RA:p.Leu297Ser				1	0.23077	0	0.884615	0.00027766	1.85e-14	0.373912
missense	-2	X	5997400	A	T	FBgn0029843	Nep1-RA:p.[Gln773Leu]; Nep1-RB:p.[Gln773Leu]				1	0	0	1	5.39e-14	4.26e-14	0.534805
missense	-2	X	11924932	T	C	FBgn0030367	Cyp311a1-RA:p.[Arg57Gly]; Cyp311a1-RB:p.[Arg157Gly]				1	0.61538	0.45455	0.465035	0.0178617	0.00499659	0.844085
missense	-2	2L	1105355	A	G	FBgn0261938	mtRNApol-RA:p.Val854Ala				0.41054	1	1	-0.58946	0.000649125	0.000647862	0.051485
missense	-2	2R	3590739	G	A	FBgn0050493	tor-RB:p.Ser912Leu				0.343353	0	0	0.343353	0.0117515	0.0117801	0.500409
missense	-2	2R	19571296	C	A	FBgn0034888	CG5431-RB:p.[Pro105His]; CG5431-RA:p.[Pro105His]				1	0	0	1	2.21e-14	4.02e-14	0.807921
missense	-2	2R	19571836	A	G	FBgn0034888	CG5431-RB:p.[Met265Val]; CG5431-RA:p.[Met265Val]				0	1	0.833737	-0.916868	4.5e-14	0.000274953	0.0745979
missense	-2	2L	5099885	G	A	FBgn0031684	CG8680-RA:p.Ala54Val				1	0.43478	0.279847	0.642687	0.00414718	0.000202928	0.434915
missense	-2	3R	17930630	T	C	FBgn0038930	CG13407-RA:p.Val218Ala				0	0.825397	0.749287	-0.787342	0.000735125	6.35e-05	0.48176
missense	-2	3R	7046336	C	A	FBgn0037878	CG6693-RA:p.Ser264Ile				0.354943	0.183335	0	0.263276	0.0229963	5.58e-05	0.118858
missense	-2	3R	22150792	C	T	FBgn0053970	CG42765-RA:p.Val53Met				0.52694	1	1	-0.47306	0.000322396	0.000322102	0.58183
missense	-2	3L	12263921	A	G	FBgn0036271	Pbgs-RA:p.Val152Ala				0	0.407407	0.40476	-0.406083	0.0117121	0.00105577	0.981489
missense	-2	3L	6753053	A	C	FBgn0052392	CG32392-RB:p.Ile313Ser				0.368687	0.2	0.1	0.218687	0.0338941	0.0115422	0.677094
missense	-2	X	4529428	T	C	FBgn0025388	CG12179-RC:p.[Glu169Gly]; CG12179-RD:p.[Glu169Gly]				0.23077	0	0	0.23077	0.00655132	0.00653176	0.565287
missense	-2	3L	1758852	T	G	FBgn0035268	CG8001-RA:p.[Leu688Arg]; CG8001-RB:p.[Leu683Arg]				0.5625	1	0.84066	-0.35783	0.0122807	0.0334911	0.131021
missense	-2	3L	1756770	A	G	FBgn0035268	CG8001-RA:p.[Glu90Gly]; CG8001-RB:p.[Glu90Gly]				0.596167	0	0	0.596167	0.033563	0.0336292	0.158112
missense	-2	3L	1756527	C	T	FBgn0035268	CG8001-RA:p.[Ala34Val]; CG8001-RB:p.[Ala34Val]				0.731967	0	0.27778	0.593077	0.00491315	0.0161003	0.373756
missense	-2	3L	10874190	G	A	FBgn0036106	CG6409-RA:p.Ser262Leu				0.505877	0.15385	0.230265	0.313819	0.005891	0.0266769	0.33501
missense	-2	3L	18820493	C	A	FBgn0000261	Cat-RA:p.Pro339His				0.642157	0	0	0.642157	0.00507299	0.00507699	0.538932
missense	-2	2R	16126613	G	A	FBgn0034485	CG13869-RA:p.Ala55Val				0	0.86152	0.48413	-0.672825	0.00136509	0.024519	0.0973619
missense	-2	2R	14420200	C	T	FBgn0034356	CG10924-RA:p.Ser20Leu				1	0	0	1	7.67e-15	4.94e-14	0.780668
missense	-2	3R	12187356	G	C	FBgn0038422	CG14880-RA:p.[Pro259Arg]; CG14880-RB:p.[Pro259Arg]				1	0.410715	0	0.794643	0.0117812	1.66e-14	0.173571
missense	-2	3R	21110312	G	A	FBgn0051300	CG31300-RA:p.Gly280Glu				0.382937	0	0	0.382937	0.00844526	0.00843769	0.812315
missense	-2	2R	12376416	C	T	FBgn0053459	CG33459-RA:p.Thr211Ile				0	0.727777	0.487777	-0.607777	0.00594323	0.0122413	0.247015
missense	-2	2R	12375684	T	C	FBgn0053459	CG33459-RA:p.Phe39Ser				0	0.613337	0.693813	-0.653575	0.0178047	0.000215033	0.656602
missense	-2	3L	14375660	C	T	FBgn0262580	CG43120-RA:p.Thr160Ile				0.320023	0	0	0.320023	0.0156284	0.015606	0.565495
missense	-2	3L	21026718	A	G	FBgn0037046	CG10581-RA:p.Phe171Ser				1	0.345833	0.33109	0.661538	0.0127034	4.37e-06	0.928013
missense	-2	2R	16948484	T	G	FBgn0034579	mRpL54-RA:p.Trp23Gly				0	0.95	0.920633	-0.935317	4.52e-05	0.000317024	0.76973
missense	-2	2L	3889634	C	A	FBgn0000256	capu-RB:p.[Arg2Leu]; capu-RH:p.[Arg60Leu]; capu-RI:p.[Arg60Leu]; capu-RD:p.[Arg160Leu]				1	0.75	0	0.625	0.0399415	5.44e-14	0.374056
missense	-2	3L	10887545	C	T	FBgn0036110	Cpr67Fb-RA:p.Ser64Phe				0.64502	0	0.16	0.56502	0.000140481	0.00106305	0.372056
missense	-2	3R	12909071	C	A	FBgn0038476	kuk-RA:p.[Pro218His]; kuk-RB:p.[Pro218His]; kuk-RC:p.[Pro218His]				0.739417	1	1	-0.260583	0.00103434	0.00103823	0.425725
missense	-2	2R	11833749	G	C	FBgn0034053	Cyp4aa1-RB:p.Arg295Pro				1	0	0.383335	0.808333	1.59e-14	0.014054	0.225725
missense	-2	2L	1354247	GT	CG	FBgn0051924	CG31924-RB:p.[His215Pro]; CG31924-RA:p.[His195Pro]				0.486273	0	0	0.486273	0.00379245	0.00378207	0.127798
missense	-2	3L	16325335	A	T	FBgn0040074	retinin-RA:p.Gln66Leu				0.331167	0	0	0.331167	0.0261674	0.0262439	0.464731
missense	-2	3R	18535610	C	T	FBgn0039010	CG4907-RA:p.Gly260Arg				1	0.646297	0.457213	0.448245	0.0102291	0.006544	0.219343
missense	-2	3R	18511396	G	A	FBgn0046114	Gclm-RA:p.Ala226Val				0.904557	0	0	0.904557	0.000202852	0.000202472	0.160694
missense	-2	3R	19095263	C	G	FBgn0004882	orb-RB:p.[Gly99Arg]; orb-RD:p.[Gly99Arg]; orb-RA:p.[Gly101Arg]				0.48648	0	0	0.48648	0.00290837	0.00290867	0.974627
missense	-2	3R	19095277	G	A	FBgn0004882	orb-RB:p.[Ala94Val]; orb-RD:p.[Ala94Val]; orb-RA:p.[Ala96Val]				0.439517	0	0	0.439517	0.00324054	0.00324782	0.120901
missense	-2	2R	9743169	G	A	FBgn0033880	CG6553-RA:p.Thr30Ile				1	0	0	1	2.71e-15	1.68e-15	0.0904047
missense	-2	2L	118851	G	A	FBgn0031228	CG4822-RA:p.[Ser230Leu]; CG4822-RB:p.[Ser230Leu]; CG4822-RC:p.[Ser230Leu]; CG4822-RD:p.[Ser230Leu]; CG4822-RE:p.[Ser230Leu]; CG4822-RF:p.[Ser230Leu]				1	0.508335	0.21647	0.637598	0.0264181	0.00165836	0.432929
missense	-2	2L	140855	T	A	FBgn0031228	CG31975-RB:p.[Asn27Tyr]; CG31975-RC:p.[Asn27Tyr]				1	0.354167	0.502343	0.571745	0.00235274	0.028712	0.447706
missense	-2	2R	17559769	A	G	FBgn0034651	CG15676-RA:p.Glu179Gly				0	0.678373	0.909187	-0.79378	0.025333	0.000213665	0.327961
missense	-2	3R	20357765	C	A	FBgn0262167	ana1-RA:p.Ala394Asp				0.84803	0	0	0.84803	0.000816758	0.000816764	0.990147
missense	-2	3R	20359925	A	G	FBgn0262167	ana1-RA:p.[Met1070Val]; ana1-RB:p.[Met430Val]				0.95111	0	0.08333	0.909445	2.68e-06	1.54e-05	0.365619
missense	-2	3R	20359385	C	G	FBgn0262167	ana1-RA:p.[Arg890Gly]; ana1-RB:p.[Arg250Gly]				1	0	0	1	4.86e-14	3.89e-14	0.837423
missense	-2	3R	20360019	GG	TT	FBgn0262167	ana1-RA:p.[Arg1101Leu]; ana1-RB:p.[Arg461Leu]				0	0.86508	0.960783	-0.912932	0.00103867	1.66e-05	0.42743
missense	-2	3R	20360000	A	G	FBgn0262167	ana1-RA:p.[Arg1095Gly]; ana1-RB:p.[Arg455Gly]				0	0.862747	0.979797	-0.921272	0.00138689	1.06e-06	0.352184
missense	-2	3R	25875117	G	A	FBgn0039742	CG15528-RB:p.Ser33Phe				1	0	0	1	3.35e-14	1.54e-14	0.0528151
missense	-2	2L	1612378	C	T	FBgn0031351	CG14352-RA:p.Ala245Val				0	0.793957	0.985507	-0.889732	0.00090151	2.73e-07	0.103397
missense	-2	2L	22040800	A	G	FBgn0051601	CG31601-RB:p.[Phe724Ser]; CG31601-RC:p.[Phe724Ser]				0	0.78241	0.511663	-0.647037	0.00366323	0.00314706	0.14815
missense	-2	2L	2385313	T	C	FBgn0031423	CG3557-RA:p.Tyr112Cys				1	0.283335	0	0.858332	0.00220159	2.37e-14	0.179008
missense	-2	3R	4074960	T	C	FBgn0040528	CG15864-RB:p.Ile206Thr				0	0.725397	0.58256	-0.653978	0.00228631	0.0226726	0.500372
missense	-2	3R	19214558	C	A	FBgn0051515	CG31515-RB:p.Trp12Cys				0.352007	1	1	-0.647993	9.72e-05	9.74e-05	0.334718
missense	-2	2R	18099103	T	C	FBgn0034713	CG11291-RA:p.Ile53Thr				0	0.78268	1	-0.89134	0.00290465	2.56e-14	0.146607
missense	-2	3R	26428583	T	C	FBgn0051021	CG31021-RB:p.Val157Ala				0.73148	0.4	0.17143	0.445765	0.0177488	0.00315087	0.902373
missense	-2	2L	3520730	A	G	FBgn0031546	CG8851-RA:p.Arg118Gly				0.639813	0.11111	0.35024	0.409138	0.000287148	0.0461539	0.241405
missense	-2	3R	15433734	T	C	FBgn0038717	CG17751-RB:p.Phe168Ser				0	1	0.964913	-0.982457	1.53e-14	1.04e-05	0.371163
missense	-2	3L	8206529	C	G	FBgn0035857	CG8006-RA:p.Arg489Gly				0.91168	0	0.17143	0.825965	3.78e-05	0.000442886	0.126874
missense	-2	2R	18450037	G	A	FBgn0034737	CG11362-RA:p.Val27Met				1	0	0	1	4.61e-14	1.66e-14	0.420831
missense	-2	2L	12111230	C	A	FBgn0263235	Phae2-RB:p.Pro28His				0.47677	0	0	0.47677	0.00753483	0.00753017	0.684231
missense	-2	2L	15547714	G	C	FBgn0259922	CG42448-RA:p.Arg32Pro				0.638287	0	0.176625	0.549974	0.00624026	0.0180876	0.117771
missense	-2	2R	12168708	C	T	FBgn0034104	CG15705-RA:p.Ser61Leu				0	0.631313	0.72075	-0.676032	0.000739289	0.000645357	0.426769
missense	-2	2R	17661393	C	A	FBgn0034659	CG4021-RA:p.Ala124Asp				0.220883	0	0	0.220883	0.00251899	0.00252887	0.416426
missense	-2	2R	16869323	T	C	FBgn0034566	CG9313-RA:p.Val166Ala				0.60101	0	0	0.60101	7.49e-06	7.5e-06	0.646237
missense	-2	3L	9694030	G	A	FBgn0036031	CG6761-RA:p.Thr814Ile				0	0.881943	1	-0.940972	0.000118876	8.22e-15	0.117313
missense	-2	2L	9349703	C	G	FBgn0263082	CG43350-RA:p.Pro30Arg				0	0.747253	0.649497	-0.698375	0.0158691	0.0292193	0.734996
missense	-2	2L	9349603	G	A	FBgn0263082	CG43350-RA:p.Cys16Tyr				1	0.339285	0	0.830357	0.00339294	8.04e-15	0.142904
missense	-2	2R	10706408	G	A	FBgn0033969	CG10202-RA:p.Ala314Val				0.33477	0	0	0.33477	0.00137181	0.00137052	0.568615
missense	-2	2L	20832083	A	G	FBgn0051674	CG31674-RA:p.Met179Val				0.2549	1	0.972223	-0.731212	0.000985969	0.00131147	0.377772
missense	-2	3R	9985696	G	A	FBgn0051327	CG31327-RA:p.Ala70Val				0.627653	0	0	0.627653	0.00274447	0.00274756	0.243904
missense	-2	2L	9921065	T	C	FBgn0032161	CG4594-RA:p.Val196Ala				0.772947	0	0.22222	0.661837	0.000493104	0.00266398	0.374039
missense	-2	2L	9921262	G	A	FBgn0032161	CG4594-RA:p.Gly262Arg				0.864367	0.2	0.15789	0.685422	0.00110757	0.00069683	0.879431
missense	-2	2R	17723667	T	A	FBgn0034664	CG4377-RA:p.Gln51Leu				0.109137	0.90303	0.819513	-0.752135	0.000283005	0.000624471	0.390877
missense	-2	2R	17723029	G	A	FBgn0034664	CG4377-RA:p.Ala223Val				0.15741	0.785547	0.85133	-0.661028	0.00916272	0.000379138	0.66565
missense	-2	3R	26531441	C	T	FBgn0051010	CG31010-RA:p.Gly63Glu				0.205407	0	0	0.205407	0.0336933	0.0336583	0.82497
missense	-2	3R	13978718	C	T	FBgn0038567	CG14316-RA:p.Ala261Val				0	0.2547	0.248013	-0.251357	0.00326479	0.0168472	0.932504
missense	-2	3R	3141673	A	G	FBgn0037498	CG10029-RA:p.Leu372Ser				0	0.6125	0.503677	-0.558088	0.0206786	0.0306165	0.654108
missense	-2	2R	14295007	C	A	FBgn0063493	GstE7-RA:p.Pro183His				0.571443	0	0	0.571443	3.41e-05	3.4e-05	0.254617
missense	-2	2L	4685357	GG	CC	FBgn0031620	CG11929-RA:p.Gly338Pro				0.157293	0	0	0.157293	0.0116181	0.0115733	0.52411
missense	-2	X	16961993	A	G	FBgn0262487	CG43077-RA:p.Phe93Ser				1	0	0.28571	0.857145	1.12e-13	0.000684221	0.375506
missense	-2	3R	26335005	C	A	FBgn0054041	CG34041-RC:p.Ser315Tyr				0.157953	0	0	0.157953	0.000480686	0.000477688	0.280068
missense	-2	2R	14568294	G	A	FBgn0034374	CG15086-RF:p.Thr1635Ile				0	0.397223	0.439817	-0.41852	0.0256724	0.0016064	0.756184
missense	-2	2R	14569106	GT	AC	FBgn0034374	CG15086-RF:p.Thr1396Val				0	0.398497	0.474877	-0.436687	0.0482094	0.000375811	0.631425
missense	-2	2R	14568846	T	C	FBgn0034374	CG15086-RF:p.Met1483Val				0.388517	0	0	0.388517	0.0087094	0.00873018	0.382199
missense	-2	3R	9045969	T	C	FBgn0038127	CG8476-RA:p.Arg73Gly				0.661327	0.14286	0.14286	0.518467	0.000560413	0.000566042	0.998662
missense	-2	3L	12775819	A	T	FBgn0036311	CG17666-RA:p.Asn401Tyr				1	0.43182	0.17241	0.697885	0.0140071	8.09e-05	0.268762
missense	-2	3L	21351094	C	T	FBgn0052437	CG32437-RA:p.Ala44Val				0.19589	0	0	0.19589	0.0252859	0.0252744	0.927636
missense	-2	3R	26431469	T	C	FBgn0051017	PH4alphaNE3-RA:p.Val426Ala				0.716603	0.225	0	0.604103	0.00460609	0.000338406	0.120866
missense	-2	3R	26431300	C	A	FBgn0051017	PH4alphaNE3-RA:p.Pro387His				0.294933	0.902457	1	-0.656295	0.00549922	0.00111874	0.252416
missense	-2	3R	27218763	C	T	FBgn0051204	CG31204-RA:p.Val138Met				0.830133	0	0	0.830133	1.99e-05	1.99e-05	0.507576
missense	-2	3R	26076163	CT	AC	FBgn0085328	CG34299-RA:p.Leu147Thr				0	0.50974	0.546667	-0.528203	0.0172314	0.0011313	0.810155
missense	-2	2R	16951329	G	C	FBgn0050293	Cht12-RA:p.Pro279Arg				0.630557	0	0	0.630557	0.00180233	0.00180258	0.904076
missense	-2	2L	14802634	C	T	FBgn0250834	CG33308-RA:p.Ala66Val				0.87768	0	0	0.87768	0.000448237	0.000448966	0.28622
missense	-2	2L	1133382	A	G	FBgn0031305	Iris-RA:p.Ile231Thr				0.692133	0	0	0.692133	0.00179427	0.00179132	0.342738
missense	-2	3R	17740073	T	G	FBgn0038919	CG17843-RA:p.Phe188Cys				1	0	0	1	1.61e-14	1.74e-14	0.911917
missense	-2	3R	17740319	G	T	FBgn0038919	CG17843-RA:p.Arg270Leu				0	1	0.821793	-0.910897	5.55e-14	0.00183194	0.186644
missense	-2	3R	19381503	G	A	FBgn0039088	CG10164-RA:p.[Ala76Val]; CG10164-RB:p.[Ala76Val]				1	0.626847	0.371137	0.501008	0.0226233	0.000180327	0.0870103
missense	-2	2R	10770906	C	T	FBgn0033980	Cyp6a20-RB:p.Thr381Ile				0.327507	1	0.904347	-0.624667	1.77e-05	0.000846386	0.172718
missense	-2	2R	10770022	A	C	FBgn0033980	Cyp6a20-RB:p.His129Pro				0.32033	0	0	0.32033	0.021347	0.0213319	0.737424
missense	-2	2R	12251573	C	A	FBgn0034122	CG15711-RA:p.Cys46Phe				0.98485	0	0.13043	0.919635	3.45e-07	3.33e-05	0.3699
missense	-2	2L	16792223	G	A	FBgn0032603	CG17928-RA:p.Val127Met				0.866477	0	0.11818	0.807387	4.92e-06	8.22e-05	0.124865
missense	-2	2R	12250612	T	C	FBgn0034121	CG6262-RA:p.[Val971Ala]; CG6262-RB:p.[Val796Ala]; CG6262-RC:p.[Val395Ala]				0	0.450617	0.364293	-0.407455	0.00159373	0.0168602	0.474442
missense	-2	2R	12250435	T	C	FBgn0034121	CG6262-RA:p.[Val912Ala]; CG6262-RB:p.[Val737Ala]; CG6262-RC:p.[Val336Ala]				1	0.45032	0.50804	0.52082	0.00139108	0.0122644	0.687903
missense	-2	3L	11514827	A	G	FBgn0036170	CG11714-RA:p.Phe264Ser				0.777087	0	0	0.777087	0.00500711	0.00500796	0.828369
missense	-2	3L	11514944	T	G	FBgn0036170	CG11714-RA:p.Asp225Ala				1	0.198967	0.365687	0.717673	7.31e-05	0.0109458	0.326102
missense	-2	2L	8390808	GA	CG	FBgn0262002	CG42820-RA:p.Val449Ala				0	0.32915	0.333333	-0.331242	0.0391848	0.0160211	0.977155
missense	-2	2L	8390416	C	A	FBgn0262002	CG42820-RA:p.Ser580Ile				0	0.507177	0.253597	-0.380387	0.0120113	0.00433212	0.110341
missense	-2	3R	15933211	G	T	FBgn0051206	CG31206-RA:p.Ala88Asp				0.982457	0.11765	0	0.923632	2.56e-05	6.28e-07	0.374564
missense	-2	2L	4645114	AC	TA	FBgn0031617	CG15635-RB:p.Thr685Tyr				0.0489533	0	0	0.0489533	0.00570718	0.00563557	0.522485
missense	-2	2L	4645277	T	A	FBgn0031617	CG15635-RB:p.Leu739Gln				0.13586	0	0	0.13586	0.00575402	0.00582283	0.169566
missense	-2	2L	4645136	T	G	FBgn0031617	CG15635-RB:p.Ile692Ser				0	0.183177	0.237207	-0.210192	0.00332375	0.000881898	0.246016
missense	-2	3L	7378869	G	A	FBgn0035776	CG8564-RA:p.Ala485Val				0	0.5614	0.485737	-0.523568	0.0230133	0.000240657	0.664248
missense	-2	2L	14547878	A	G	FBgn0250844	CG4218-RA:p.Phe227Ser				0.17831	0.966667	1	-0.805023	0.000240922	0.000121183	0.372708
missense	-2	2L	14547898	CA	AT	FBgn0250844	CG4218-RA:p.Met220Asn				0.14394	1	1	-0.85606	9.97e-06	9.97e-06	0.555803
missense	-2	2L	14547954	T	C	FBgn0250844	CG4218-RA:p.Met202Val				0.27668	0.955557	1	-0.701098	0.0028805	0.00175465	0.368223
missense	-2	2L	14547995	T	C	FBgn0250844	CG4218-RA:p.Glu188Gly				0.216925	0.95238	1	-0.759265	0.00100257	0.00045338	0.368632
missense	-2	2L	8240578	T	C	FBgn0028987	Spn2-RA:p.Met339Val				0	0.30238	0.272197	-0.287288	0.000605755	0.0015513	0.55623
missense	-2	3L	21338613	G	A	FBgn0052436	ebd2-RA:p.[Ser210Leu]; ebd2-RB:p.[Ser210Leu]				0.219573	0	0	0.219573	0.00528826	0.00526591	0.265157
missense	-2	2R	17656051	GT	CC	FBgn0050395	CG30395-RB:p.Val607Pro				1	0.299465	0.19124	0.754648	0.00168923	0.000487336	0.623969
missense	-2	2R	17654981	C	T	FBgn0050395	CG30395-RB:p.Ser411Leu				0.868643	0.41667	0.08	0.620308	0.00909727	0.000312274	0.472611
missense	-2	2R	17654031	C	A	FBgn0050395	CG30395-RB:p.Pro209His				1	0.33333	0.19444	0.736115	0.00132364	0.000133815	0.735073
missense	-2	2R	17656577	T	C	FBgn0050395	CG30395-RB:p.Leu708Ser				0	0.863157	0.833063	-0.84811	0.000225736	6.49e-05	0.738011
missense	-2	2R	17654861	T	G	FBgn0050395	CG30395-RB:p.Ile393Ser				1	0.43478	0.15194	0.70664	0.00410756	0.000123148	0.966382
missense	-2	2R	17655166	GA	AG	FBgn0050395	CG30395-RB:p.Gly454Glu				1	0.17647	0.22107	0.80123	8.98e-05	0.000330514	0.145868
missense	-2	2R	17654405	G	A	FBgn0050395	CG30395-RB:p.Gly296Glu				1	0.125	0.253335	0.810832	2.12e-05	0.000606193	0.250323
missense	-2	2R	17655852	C	T	FBgn0050395	CG30395-RB:p.Ala585Val				1	0.14286	0.12903	0.864055	3.63e-05	2.41e-05	0.941771
missense	-2	2L	8392873	TC	CA	FBgn0015583	Acp29AB-RA:p.Arg113Leu				1	0.547985	0.666247	0.392884	0.0331416	7.49e-05	0.20609
missense	-2	3L	18114189	A	G	FBgn0262100	CG42853-RA:p.Ile261Thr				1	0.61654	0.33888	0.52229	0.0224068	0.0043951	0.0836479
missense	-2	3L	18114248	AA	TG	FBgn0262100	CG42853-RA:p.Ile241Thr				0	0.333333	0.66005	-0.496692	0.0177735	0.0232936	0.184119
missense	-2	2L	15485279	T	C	FBgn0020371	Tim17b2-RA:p.Ile148Thr				0.33266	0	0	0.33266	0.00931458	0.00932018	0.819792
missense	-2	2L	10646971	C	T	FBgn0032275	CG17097-RB:p.Ser158Leu				0.456177	0.23077	0	0.340792	0.0131985	0.000545904	0.373716
missense	-2	2L	10646935	C	T	FBgn0032275	CG17097-RB:p.Ser146Leu				0.46987	0	0	0.46987	0.00368703	0.00368601	0.855762
missense	-2	2L	10646911	C	T	FBgn0032275	CG17097-RB:p.Ser138Leu				0.355487	0	0	0.355487	0.0236413	0.0236277	0.815042
missense	-2	3R	8274107	G	A	FBgn0038052	CG5538-RA:p.Val195Met				0.140865	1	1	-0.859135	5.98e-05	5.98e-05	0.442618
missense	-2	3R	15840542	C	T	FBgn0038762	CG4836-RA:p.[Ala190Val]; CG4836-RC:p.[Ala190Val]; CG4836-RB:p.[Ala190Val]; CG4836-RD:p.[Ala197Val]; CG4836-RE:p.[Ala197Val]				1	0.2423	0.192697	0.782502	0.000620247	0.000371073	0.794941
missense	-2	3R	21065958	T	C	FBgn0039298	to-RA:p.Val16Ala				1	0.27922	0.42619	0.647295	0.000939764	0.0119276	0.62961
missense	-2	2L	2416137	G	A	FBgn0051948	CG31948-RA:p.[Thr93Ile]; CG31948-RB:p.[Thr162Ile]				0.93048	0.165265	0	0.847847	0.000439946	1.25e-05	0.182664
missense	-2	2R	12424140	CT	TG	FBgn0259795	loopin-1-RA:p.[Ala480Val]; loopin-1-RC:p.[Ala480Val]				0	0.580663	0.243487	-0.412075	0.00942062	0.000168231	0.0545306
missense	-2	3R	18317661	G	A	FBgn0038978	CG7045-RA:p.Gly5Arg				0.633823	0	0	0.633823	0.000285725	0.000286307	0.270299
missense	-2	2R	17720718	T	A	FBgn0054040	CG34040-RA:p.Asn99Tyr				0.185245	0.80914	1	-0.719325	0.00412076	0.000156026	0.122156
missense	-2	3R	9180597	G	A	FBgn0045442	mthl12-RA:p.Gly346Glu				0.443833	0.962963	0.91398	-0.494638	0.00543754	0.0186044	0.628964
missense	-2	3R	21790207	CA	TC	FBgn0000206	boss-RA:p.Ala187Val				1	0.41667	0.43723	0.57305	0.00343516	0.00187049	0.133131
missense	-2	2R	3670769	T	C	FBgn0000337	cn-RA:p.Met488Val				0.707007	0.247443	0.327777	0.419397	0.00858048	0.016697	0.257487
missense	-2	2R	3670805	C	G	FBgn0000337	cn-RA:p.Gly476Arg				0.232953	0.68611	0.69718	-0.458692	0.00426996	6.43e-05	0.893207
missense	-2	2L	644730	A	G	FBgn0000497	ds-RA:p.Val2341Ala				0.842913	0.47059	0.06061	0.577313	0.0139885	0.000101921	0.436539
missense	-2	2L	654492	A	G	FBgn0000497	ds-RA:p.Leu1124Ser				0.637723	0.261905	0.11354	0.450001	0.0202477	0.00210036	0.421725
missense	-2	3L	12184826	C	A	FBgn0000594	Est-P-RA:p.Ala330Asp				0.744673	0	0	0.744673	0.000973416	0.000972379	0.100311
missense	-2	2L	4212577	GT	AC	FBgn0001075	ft-RA:p.Thr1755Val				0	0.37037	0.503263	-0.436817	0.0228968	0.043279	0.544858
missense	-2	2L	4214269	G	A	FBgn0001075	ft-RA:p.Thr1191Ile				0	0.805557	0.805847	-0.805702	0.014311	0.000362705	0.999421
missense	-2	2L	4205166	T	C	FBgn0001075	ft-RA:p.Met3159Val				0.943563	0	0.403845	0.741641	5.21e-06	0.0130249	0.15895
missense	-2	2L	4213660	A	G	FBgn0001075	ft-RA:p.Leu1394Ser				0.900853	0	0	0.900853	0.000191796	0.000191838	0.860942
missense	-2	2L	4206702	GT	AG	FBgn0001075	ft-RA:p.His2665Pro				0.89017	0	0.31667	0.731835	0.000316467	0.0122576	0.196727
missense	-2	2L	4212727	C	T	FBgn0001075	ft-RA:p.Gly1705Glu				1	0.156333	0.454025	0.694821	4.53e-07	0.0232002	0.49599
missense	-2	2L	6019171	G	A	FBgn0001170	H2.0-RA:p.Ala8Val				0.611183	0.125	0	0.548683	0.00088883	0.000231854	0.374368
missense	-2	3L	6117912	A	G	FBgn0002440	l(3)mbn-RB:p.Val422Ala				0.947917	0.524617	0.62801	0.371603	0.00357349	0.00854578	0.163561
missense	-2	2R	4321876	G	A	FBgn0002533	Lcp2-RA:p.Ser34Leu				0.260557	0	0	0.260557	0.0131114	0.0131837	0.062635
missense	-2	3R	21854866	A	G	FBgn0002631	HLHm5-RA:p.Val170Ala				1	0	0	1	4.54e-14	3.13e-14	0.807502
missense	-2	3R	21858764	C	T	FBgn0002632	m6-RA:p.Ser20Leu				1	0	0	1	1.58e-14	1.61e-14	0.415943
missense	-2	2L	8440669	CC	TT	FBgn0002887	mus201-RA:p.[Ser742Phe]; mus201-RB:p.[Ser721Phe]; mus201-RC:p.[Ser721Phe]				0.817877	0.183335	0.18109	0.635664	0.000457913	0.000464733	0.987799
missense	-2	3L	7323690	A	G	FBgn0002909	mus312-RD:p.[Glu288Gly]; mus312-RA:p.[Glu288Gly]				0	0.488677	0.586267	-0.537472	0.0235556	0.00706876	0.615894
missense	-2	3L	6594399	A	T	FBgn0002926	ndl-RA:p.Leu441Gln				0.955557	0.200895	0.444875	0.632672	0.000523992	0.0132149	0.376613
missense	-2	3L	6592982	T	C	FBgn0002926	ndl-RA:p.Glu893Gly				0.14762	0.83508	0.605227	-0.572533	0.000562692	0.0398005	0.235973
missense	-2	3R	4762418	G	A	FBgn0003015	osk-RA:p.[Gly403Glu]; osk-RC:p.[Gly265Glu]				0	0.3293	0.418947	-0.374123	0.00202589	0.0391877	0.574184
missense	-2	3L	19303331	G	C	FBgn0003089	pip-RE:p.[Pro189Arg]; pip-RL:p.[Pro294Arg]				0.286443	0	0	0.286443	0.0103968	0.0104387	0.110573
missense	-2	3R	11655057	G	A	FBgn0003227	CG4576-RA:p.Val432Met				1	0.380395	0.51136	0.554122	0.00542266	0.000566315	0.149564
missense	-2	2L	4939196	C	T	FBgn0003372	Sgs1-RA:p.Thr564Ile				0.133203	0	0	0.133203	0.0305671	0.0307218	0.422722
missense	-2	2L	4940687	CT	TA	FBgn0003372	Sgs1-RA:p.Thr1061Ile				0	0.225	0.29867	-0.261835	0.0123122	0.0153343	0.460344
missense	-2	3R	13421139	T	C	FBgn0003375	Sgs5-RA:p.Leu9Ser				0.9899	0	0	0.9899	6.68e-08	6.69e-08	0.95573
missense	-2	2R	7220481	G	A	FBgn0003382	sha-RB:p.[Gly634Glu]; sha-RA:p.[Gly627Glu]				1	0	0	1	1.48e-14	1.23e-14	0.878377
missense	-2	3R	8866772	C	T	FBgn0003450	snk-RA:p.[Gly171Glu]; snk-RB:p.[Gly171Glu]				0.758373	0.21429	0.22078	0.540838	0.000898369	0.00156587	0.498741
missense	-2	3R	25868173	T	C	FBgn0003510	Sry-alpha-RA:p.Val397Ala				1	0	0	1	1.07e-15	9.45e-15	0.129209
missense	-2	3R	25867396	A	G	FBgn0003510	Sry-alpha-RA:p.Tyr138Cys				1	0	0	1	5.85e-14	1.37e-15	0.299969
missense	-2	2R	13749602	A	G	FBgn0003701	thr-RB:p.Ile1214Thr				0	0.805557	0.880287	-0.842922	0.000132498	0.000177486	0.433565
missense	-2	2R	18934400	C	G	FBgn0003900	twi-RA:p.[Pro132Arg]; twi-RB:p.[Pro132Arg]				0.87451	0	0	0.87451	0.000159314	0.000159361	0.859178
missense	-2	2R	18934757	T	A	FBgn0003900	twi-RA:p.[Leu251Gln]; twi-RB:p.[Leu251Gln]				0.767627	0.2	0	0.667627	0.00667563	0.0029087	0.374086
missense	-2	2R	3468794	A	G	FBgn0004133	blow-RC:p.[Val367Ala]; blow-RB:p.[Val472Ala]; blow-RA:p.[Val479Ala]				0.954547	0.316665	0.18889	0.701769	0.00889051	0.000882882	0.64245
missense	-2	2L	13826067	G	A	FBgn0004406	tam-RA:p.Ser542Phe				0.78853	0	0	0.78853	0.000589942	0.000590153	0.801884
missense	-2	2L	13827076	T	C	FBgn0004406	tam-RA:p.Arg206Gly				0.764203	0	0	0.764203	0.00112571	0.00112456	0.481861
missense	-2	2L	13832138	G	A	FBgn0004407	DNApol-gamma35-RA:p.Ala164Val				0.255433	0	0	0.255433	0.0293261	0.0294286	0.243866
missense	-2	3R	14195566	C	T	FBgn0004618	gl-RA:p.[Gly390Glu]; gl-RB:p.[Gly390Glu]				0.837963	0.33333	0.37981	0.481393	0.00982301	0.0255338	0.446619
missense	-2	3R	25784965	A	T	FBgn0004622	Takr99D-RB:p.[Leu70Gln]; Takr99D-RA:p.[Leu70Gln]				1	0	0.199075	0.900462	7e-15	0.000279317	0.140807
missense	-2	3R	22829406	G	A	FBgn0004842	CG6296-RA:p.Ser556Leu				0.419523	0.81074	1	-0.485847	0.0486032	0.00174873	0.17619
missense	-2	3R	22829595	G	C	FBgn0004842	CG6296-RA:p.Pro493Arg				0.43491	0.125	0	0.37241	0.00207831	0.000279317	0.374218
missense	-2	3R	20921384	C	T	FBgn0004898	fd96Cb-RA:p.Ala182Val				0.66084	1	1	-0.33916	3.37e-05	3.37e-05	0.706422
missense	-2	3R	3077651	A	G	FBgn0011282	Pbprp4-RC:p.Ile10Thr				0.22681	0	0	0.22681	0.0245846	0.0245602	0.815841
missense	-2	3L	10259272	GT	AA	FBgn0011569	can-RA:p.Thr215Phe				0.25262	1	0.916667	-0.705713	1.48e-06	0.00144835	0.373687
missense	-2	2R	13775425	C	T	FBgn0011589	proPO-A1-RA:p.Val542Met				0.680027	0	0	0.680027	0.000114354	0.000114221	0.560063
missense	-2	2R	13781242	G	A	FBgn0011589	CG14492-RA:p.Thr182Ile				0.639643	0	0	0.639643	0.0021409	0.00213872	0.414669
missense	-2	2L	10806791	C	T	FBgn0011676	Nos-RE:p.[Val877Met]; Nos-RA:p.[Val982Met]; Nos-RC:p.[Val982Met]				1	0	0	1	6.99e-14	7.87e-14	0.574044
missense	-2	3L	11924539	C	T	FBgn0011723	byn-RA:p.Thr20Ile				0.51058	0.259805	0.13333	0.314012	0.0418632	0.00234186	0.311183
missense	-2	3L	11924545	T	G	FBgn0011723	byn-RA:p.Ile22Ser				0.415873	0.226925	0.13333	0.235746	0.0429308	0.00193168	0.331551
missense	-2	2R	3896087	G	A	FBgn0013308	Odc2-RA:p.Val319Met				0.586193	0.17193	0.23905	0.380703	0.0146145	0.0269748	0.682981
missense	-2	2L	17505070	C	T	FBgn0013810	Dhc36C-RB:p.Ala562Val				0.845237	0	0.236175	0.727149	0.000804587	0.00492307	0.120186
missense	-2	3L	21467937	G	A	FBgn0014143	croc-RA:p.Ala453Val				0.27661	0	0	0.27661	0.0379134	0.037927	0.840091
missense	-2	3R	3741658	A	T	FBgn0014931	CG2678-RA:p.Gln354Leu				0.989247	0.31528	0.479443	0.591885	0.0025732	0.00390097	0.27652
missense	-2	2L	13830938	T	C	FBgn0015271	Orc5-RA:p.Val301Ala				0.651987	0	0	0.651987	0.00980174	0.00980504	0.642659
missense	-2	3L	17353716	C	T	FBgn0015550	tap-RA:p.Ala275Val				0.631747	0	0	0.631747	0.00772061	0.00772145	0.919269
missense	-2	3R	3193967	C	A	FBgn0015770	MstProx-RA:p.Ser319Ile				0.261833	0.09091	0	0.216378	0.00253424	9.09e-05	0.366356
missense	-2	3L	22718470	T	C	FBgn0016034	mael-RC:p.[Phe235Ser]; mael-RA:p.[Phe232Ser]; mael-RB:p.[Phe232Ser]				0.70032	0.26173	0.2184	0.460255	0.0483244	0.0452798	0.640145
missense	-2	2R	16804655	TC	CT	FBgn0020617	Rx-RA:p.Ser4Leu				0.662063	0	0	0.662063	0.0147721	0.0147728	0.968821
missense	-2	3L	6136591	C	T	FBgn0020641	Lcp65Ad-RA:p.Ala8Val				1	0.417545	0.456817	0.562819	0.00702167	0.0341909	0.467527
missense	-2	2L	21363933	A	G	FBgn0023090	dtr-RA:p.Met396Val				0.790043	0	0.11111	0.734488	0.00185179	0.00272945	0.370066
missense	-2	2R	12542017	G	A	FBgn0024319	Nach-RC:p.[Ala159Val]; Nach-RB:p.[Ala159Val]; Nach-RA:p.[Ala159Val]				0.326983	0	0.16	0.246983	0.000582647	0.0121419	0.373703
missense	-2	X	16200123	C	T	FBgn0027521	CG3679-RA:p.Thr603Ile				1	0	0	1	1.8e-14	2.53e-14	0.69472
missense	-2	2R	5683989	T	C	FBgn0027589	CG1698-RA:p.Leu216Ser				0.465137	0	0	0.465137	0.0118843	0.0118843	1
missense	-2	2R	5684113	C	T	FBgn0027589	CG1698-RA:p.Ala239Val				0.47707	0	0	0.47707	0.00403963	0.00403144	0.388671
missense	-2	2L	15579233	T	C	FBgn0028370	kek3-RA:p.[Val94Ala]; kek3-RB:p.[Val94Ala]				0.646153	0	0.166665	0.562821	0.0071517	0.0189904	0.132726
missense	-2	2L	16095855	A	G	FBgn0028520	CG4891-RA:p.Arg274Gly				0.391263	0	0	0.391263	0.00147263	0.00147319	0.911696
missense	-2	3L	11957361	T	G	FBgn0028573	prc-RB:p.Asp164Ala				0.234127	0	0	0.234127	0.00265591	0.00267803	0.102246
missense	-2	2L	15164808	G	T	FBgn0028888	CG4168-RB:p.Ala1070Asp				0.57963	0	0.14881	0.505225	8.44e-05	0.00259637	0.186794
missense	-2	2L	16336213	G	A	FBgn0028899	CG31817-RB:p.Ser491Phe				0	0.162417	0.29188	-0.227148	0.00811463	0.0158779	0.17994
missense	-2	2L	16336996	G	T	FBgn0028899	CG31817-RB:p.Ser250Tyr				0.850707	0	0.25	0.725707	2.48e-08	0.000782326	0.375003
missense	-2	2L	16334656	C	A	FBgn0028899	CG31817-RB:p.Ser1010Ile				0.294207	1	0.816063	-0.613825	0.00256932	0.0320934	0.208396
missense	-2	2L	16332931	A	T	FBgn0028899	CG31817-RB:p.Leu1585Gln				0.757793	0	0.19158	0.662003	0.000250709	0.00298741	0.16814
missense	-2	2L	16332653	C	T	FBgn0028899	CG31817-RB:p.Gly1678Arg				0.259877	1	0.793847	-0.637047	0.000189037	0.0392788	0.286424
missense	-2	2L	15878957	C	A	FBgn0028935	CG7653-RB:p.Arg149Leu				0.63987	0	0.18927	0.545235	9.09e-05	0.00397032	0.17156
missense	-2	3L	11017597	T	C	FBgn0029172	Fad2-RA:p.Val320Ala				0.5602	0	0.14855	0.485925	0.0103556	0.0256331	0.122491
missense	-2	X	12271496	T	G	FBgn0030385	Ir11a-RA:p.Tyr98Ser				1	0	0.2	0.9	7.26e-15	0.000151345	0.373099
missense	-2	X	15360930	G	A	FBgn0030642	CG15642-RA:p.Ala163Val				1	0	0	1	1.27e-13	7.37e-14	0.782933
missense	-2	X	17094963	A	G	FBgn0030823	CG8918-RA:p.Val449Ala				0.37037	0	0	0.37037	0.0258264	0.0258082	0.827874
missense	-2	X	20803624	T	C	FBgn0031139	CG11227-RB:p.[Tyr277Cys]; CG11227-RA:p.[Tyr266Cys]				1	0	0	1	9.18e-15	8.49e-15	0.900915
missense	-2	2L	423522	C	T	FBgn0031255	BBS8-RA:p.Ser24Phe				0	0.39015	0.699497	-0.544823	0.0104001	0.00391991	0.0997612
missense	-2	2L	3035155	C	T	FBgn0031496	CG17258-RB:p.Gly30Arg				0.426327	0	0	0.426327	0.000274137	0.000274	0.849846
missense	-2	2L	3270944	C	G	FBgn0031513	CG3347-RB:p.Pro317Arg				0.944443	0	0	0.944443	6.94e-05	6.93e-05	0.279167
missense	-2	2L	3270781	A	C	FBgn0031513	CG3347-RB:p.His282Pro				0.05882	0.5333	0.551333	-0.483497	0.0373428	0.0162986	0.93558
missense	-2	2L	3481861	G	A	FBgn0031542	CG15414-RA:p.Ala19Val				0.64649	0	0	0.64649	0.00089952	0.000897618	0.261545
missense	-2	2L	4464179	GC	TA	FBgn0031610	CG15436-RA:p.Ala112Tyr				0.516857	0.28571	0	0.374002	0.0147427	0.000176199	0.373045
missense	-2	2L	5056282	C	A	FBgn0031678	CG31918-RA:p.Gly619Trp				0	0.63288	0.697377	-0.665128	0.000886319	0.00279562	0.641598
missense	-2	2L	5965724	G	A	FBgn0031756	CG13992-RA:p.[Ala592Val]; CG13992-RB:p.[Ala592Val]				0.718117	0.08333	0.5	0.426452	0.000808118	0.0383311	0.457625
missense	-2	2L	6357256	C	T	FBgn0031804	CG9500-RA:p.Gly272Arg				1	0	0.602565	0.698717	3.17e-14	0.0426999	0.120379
missense	-2	2L	6739857	G	T	FBgn0031854	TTLL3A-RA:p.Ser107Tyr				0.665513	0	0.36842	0.481303	0.00862247	0.0427335	0.372376
missense	-2	2L	6958954	C	T	FBgn0031875	CG3430-RA:p.Thr578Ile				0	0.461537	0.211203	-0.33637	0.0399072	4.43e-05	0.179748
missense	-2	2L	8399470	AG	GA	FBgn0032040	CG13386-RA:p.Glu118Gly				0	0.442277	0.566237	-0.504257	0.0103887	7.94e-05	0.294835
missense	-2	2L	8399470	A	G	FBgn0032040	CG13386-RA:p.Glu118Gly				1	0.35714	0.16026	0.7413	0.00177555	7.66e-05	0.931233
missense	-2	2L	9546306	G	A	FBgn0032127	CG13114-RB:p.Cys97Tyr				0.622197	0	0	0.622197	0.00781825	0.00781402	0.720393
missense	-2	2L	9766019	GT	AC	FBgn0032142	CG13120-RA:p.Thr245Val				0.1	1	1	-0.9	8.43e-06	8.44e-06	0.190728
missense	-2	2L	9767112	T	C	FBgn0032143	CG4017-RA:p.Ile14Thr				0.939393	0.404167	0.55901	0.457805	0.00275761	0.00612017	0.0802912
missense	-2	2L	9923223	CA	TT	FBgn0032163	CG13125-RA:p.Leu442Gln				0.25084	0	0	0.25084	0.0300673	0.0299712	0.108922
missense	-2	2L	10681090	TG	CT	FBgn0032280	CG17105-RA:p.Val15Ala				0	0.628983	0.4462	-0.537592	0.00016009	0.0397088	0.304049
missense	-2	2L	10681128	G	C	FBgn0032280	CG17105-RA:p.Gly28Arg				0	0.55585	0.43651	-0.49618	0.00209209	0.0475312	0.529838
missense	-2	2L	11071250	G	A	FBgn0032335	CG14915-RA:p.Val64Met				0	0.42107	0.236533	-0.328802	0.00522965	0.00116183	0.0859694
missense	-2	2L	11517634	G	T	FBgn0032364	CG4970-RB:p.Ser48Ile				0.450793	0	0	0.450793	0.00774168	0.00775296	0.623804
missense	-2	2L	12128953	T	C	FBgn0032414	CG17211-RA:p.Ile1130Thr				0.54484	0.21111	0.15789	0.36034	0.0170436	0.00572934	0.375701
missense	-2	2L	13412616	G	T	FBgn0032522	CG16848-RA:p.Trp8Cys				0	1	0.794267	-0.897133	1.99e-14	0.0053272	0.226796
missense	-2	2L	13413151	A	T	FBgn0032522	CG16848-RA:p.Asn187Tyr				1	0.557145	0.33333	0.554763	0.0383048	0.0013291	0.329791
missense	-2	2L	17530698	G	A	FBgn0032649	CG15145-RA:p.Ser467Leu				0.749123	0	0.35484	0.571703	0.00475611	0.0236344	0.375717
missense	-2	2L	18091823	G	A	FBgn0032663	CG15153-RA:p.Thr139Ile				0.295053	0	0	0.295053	0.0299183	0.029914	0.961169
missense	-2	2L	19059735	T	C	FBgn0032749	Phlpp-RA:p.Val30Ala				0.2116	0	0	0.2116	0.0280655	0.0281415	0.537228
missense	-2	2L	19562252	T	C	FBgn0032808	CG13079-RA:p.Leu823Ser				0.810187	0	0.21429	0.703042	0.00360275	0.00796771	0.373984
missense	-2	2L	21897432	C	A	FBgn0032965	CG11629-RA:p.Arg277Leu				0.923247	0	0	0.923247	1.83e-05	1.82e-05	0.145037
missense	-2	2R	3217780	G	A	FBgn0033159	Dscam-RBZ:p.[Ser1326Leu]; Dscam-RCC:p.[Ser1326Leu]; Dscam-RBX:p.[Ser1329Leu]; Dscam-RCA:p.[Ser1326Leu]; Dscam-RBY:p.[Ser1326Leu]; Dscam-RCB:p.[Ser1326Leu]				1	0.53846	0.344687	0.558427	0.0102664	0.00236884	0.462399
missense	-2	2R	3226925	A	G	FBgn0033159	Dscam-RAL:p.Phe707Ser				0	0.85357	0.78442	-0.818995	1.23e-05	0.00756576	0.68787
missense	-2	2R	4808760	T	G	FBgn0033348	CG8247-RB:p.Asp385Ala				0.325007	0	0	0.325007	0.0146353	0.0145915	0.0516748
missense	-2	2R	6797806	T	C	FBgn0033573	Obp47a-RA:p.[Val105Ala]; Obp47a-RB:p.[Val100Ala]				0.37143	0.923077	0.659307	-0.419762	0.00538639	0.044529	0.1701
missense	-2	2R	7121148	T	C	FBgn0033587	CG13218-RA:p.Glu21Gly				0.988507	0.398355	0.28261	0.648024	0.020438	0.00111133	0.739038
missense	-2	2R	7146853	A	G	FBgn0033600	Cpr47Ec-RA:p.Val122Ala				0	0.939393	0.98485	-0.962122	0.000100249	3.37e-07	0.510767
missense	-2	2R	8233057	A	G	FBgn0033718	ana3-RA:p.Glu156Gly				1	0	0	1	1.64e-14	1.71e-15	0.61982
missense	-2	2R	8279052	G	A	FBgn0033726	Cpr49Ad-RA:p.Ala16Val				1	0	0	1	2.78e-14	7.02e-14	0.39628
missense	-2	2R	9391394	CA	AT	FBgn0033845	mars-RA:p.[Pro285His]; mars-RB:p.[Pro285His]				0.550507	0	0	0.550507	0.0186858	0.0186806	0.863415
missense	-2	2R	9643425	C	T	FBgn0033866	CG6280-RA:p.Ala134Val				0	0.766273	1	-0.883137	0.00110457	6.25e-16	0.0628614
missense	-2	2R	9663190	C	A	FBgn0033867	Cpr50Ca-RA:p.Pro493His				0.595527	0.152575	0	0.519239	0.0149119	0.00518296	0.135922
missense	-2	2R	10527786	A	C	FBgn0033950	CG12862-RA:p.Leu86Arg				0	0.606547	0.95238	-0.779463	0.0105566	3.68e-05	0.0715245
missense	-2	2R	10766218	C	T	FBgn0033979	Cyp6a19-RA:p.Ala305Val				0.34232	1	0.95238	-0.63387	0.00121069	0.002829	0.3729
missense	-2	2R	11147196	CA	AC	FBgn0034005	alphaPS4-RA:p.Pro191His				1	0	0	1	1.08e-14	1.01e-13	0.754387
missense	-2	2R	12171503	C	T	FBgn0034106	CG9068-RA:p.Ser171Phe				1	0	0	1	3.06e-14	1.86e-14	0.941271
missense	-2	2R	12174003	G	A	FBgn0034106	CG9068-RA:p.Gly942Glu				1	0.363757	0.420235	0.608004	8.99e-05	0.0129679	0.654058
missense	-2	2R	12172017	C	T	FBgn0034106	CG9068-RA:p.Ala321Val				1	0.236527	0.116667	0.823403	0.000261045	4.25e-08	0.130952
missense	-2	2R	13084319	T	C	FBgn0034205	CG10950-RA:p.Ile481Thr				0.89423	0.38	0.399157	0.504652	0.00997843	0.00411881	0.361252
missense	-2	2R	13633248	T	C	FBgn0034272	Ir54a-RA:p.Val548Ala				0.83904	0	0	0.83904	0.000226483	0.000226616	0.593739
missense	-2	2R	13633245	T	C	FBgn0034272	Ir54a-RA:p.Ile547Thr				0.80773	0	0	0.80773	0.000648983	0.000648371	0.541723
missense	-2	2R	13632816	GC	CA	FBgn0034272	Ir54a-RA:p.Arg404Pro				0.665927	0	0	0.665927	0.0194809	0.0195041	0.396353
missense	-2	2R	14336590	C	A	FBgn0034350	CG30120-RB:p.Pro386His				0.34174	0	0	0.34174	0.0452959	0.0453127	0.883974
missense	-2	2R	14336664	G	C	FBgn0034350	CG30120-RB:p.Gly411Arg				0.394873	0	0	0.394873	0.010493	0.010512	0.356708
missense	-2	2R	14340452	T	C	FBgn0034352	CG17669-RA:p.Met485Val				0.86598	0.334293	0.604277	0.396695	0.0419642	0.00451272	0.212511
missense	-2	2R	14676946	T	C	FBgn0034391	CG15080-RA:p.Val37Ala				0.36846	0	0	0.36846	0.0409156	0.0409505	0.610816
missense	-2	2R	15400892	T	G	FBgn0034458	Ir56d-RA:p.Asp62Ala				1	0.08696	0	0.95652	4.72e-06	1.07e-14	0.376616
missense	-2	2R	16206089	A	G	FBgn0034502	CG13871-RA:p.Met393Val				1	0	0	1	1.63e-14	3.4e-14	0.319416
missense	-2	2R	17754292	C	T	FBgn0034667	comr-RA:p.Gly3Arg				0	0.76389	0.816603	-0.790247	0.00619199	5.53e-05	0.74399
missense	-2	2R	17753742	G	A	FBgn0034667	comr-RA:p.Ala186Val				1	0	0.15	0.925	2.11e-14	5.62e-05	0.115993
missense	-2	2R	18061887	CC	TT	FBgn0034703	CG3045-RA:p.Gly73Asn				1	0.18182	0	0.90909	0.000100623	5.28e-14	0.374045
missense	-2	2R	18061066	T	G	FBgn0034703	CG3045-RA:p.Asp290Ala				0.990477	0	0	0.990477	5.25e-08	5.25e-08	0.553975
missense	-2	2R	18091910	T	C	FBgn0034710	CG3292-RA:p.Met342Val				1	0.15385	0	0.923075	5.11e-05	7.15e-15	0.378217
missense	-2	2R	18316677	C	T	FBgn0034730	ppk12-RA:p.Thr472Ile				0.184317	0	0	0.184317	0.0131377	0.013029	0.0966714
missense	-2	2R	18364054	G	A	FBgn0034732	CG3701-RA:p.Ala223Val				0.83768	0.15385	0	0.760755	0.00216113	0.00109272	0.374058
missense	-2	2R	18722236	C	T	FBgn0034782	CG12490-RB:p.Thr5Ile				0.0982933	0	0	0.0982933	0.00233925	0.00234561	0.826285
missense	-2	2R	19692820	CT	TC	FBgn0034906	CG5539-RA:p.Ala120Val				1	0.673077	0.759907	0.283508	0.0196088	0.00276772	0.406293
missense	-2	2R	19791531	A	G	FBgn0034928	CG13562-RA:p.Tyr11Cys				1	0.65873	0.46316	0.439055	0.000961729	0.0120943	0.0988464
missense	-2	3L	678175	C	T	FBgn0035151	CG17129-RA:p.[Gly524Glu]; CG17129-RB:p.[Gly524Glu]; CG17129-RC:p.[Gly524Glu]				0.353623	0	0	0.353623	0.00876899	0.00877722	0.737353
missense	-2	3L	679564	C	G	FBgn0035151	CG17129-RA:p.[Arg61Pro]; CG17129-RB:p.[Arg61Pro]; CG17129-RC:p.[Arg61Pro]				0.743157	0	0	0.743157	0.000134613	0.000134706	0.472612
missense	-2	3L	842356	T	C	FBgn0035167	Gr61a-RA:p.Val177Ala				0.557497	0	0	0.557497	0.00212194	0.00212422	0.639776
missense	-2	3L	849645	T	A	FBgn0035168	CG13889-RA:p.Leu1565Gln				0.972223	0	0.21875	0.862848	4.08e-06	0.000322138	0.372487
missense	-2	3L	846995	C	T	FBgn0035168	CG13889-RA:p.Ala799Val				0.12	1	0.933333	-0.846667	1.79e-05	0.00033023	0.376284
missense	-2	3L	1238204	C	T	FBgn0035192	CG9192-RA:p.Cys11Tyr				0	1	1	-1	4.89e-15	1.43e-14	0.776664
missense	-2	3L	1253676	T	C	FBgn0035197	CG9130-RA:p.[Val480Ala]; CG9130-RB:p.[Val480Ala]				1	0	0.10345	0.948275	7.91e-14	9.74e-06	0.370274
missense	-2	3L	1608078	T	G	FBgn0035239	CG33791-RB:p.[Leu952Arg]; CG33791-RD:p.[Leu952Arg]				0	1	0.79762	-0.89881	9.12e-15	0.00166008	0.128434
missense	-2	3L	1613537	A	G	FBgn0035239	CG12105-RA:p.Val680Ala				0.14379	1	0.75	-0.73121	6.2e-05	0.00433509	0.0667913
missense	-2	3L	1611668	GT	AC	FBgn0035239	CG12105-RA:p.Thr1303Val				0.1	1	0.786667	-0.793333	8.32e-06	0.00339146	0.140549
missense	-2	3L	1611370	TGG	GTT	FBgn0035239	CG12105-RA:p.Pro1402Asn				1	0	0	1	8.26e-15	1.85e-14	0.530136
missense	-2	3L	1614893	T	C	FBgn0035239	CG12105-RA:p.Glu228Gly				0.886217	0	0	0.886217	0.000105336	0.000105227	0.214633
missense	-2	3L	1694865	G	C	FBgn0035260	CG12011-RA:p.Arg51Pro				0.833333	0	0.310455	0.678106	0.00225703	0.0236802	0.184239
missense	-2	3L	2173096	G	C	FBgn0035312	CG15820-RA:p.Arg298Gly				0	0.612083	0.75223	-0.682157	0.0477592	4.53e-07	0.555038
missense	-2	3L	2637374	G	T	FBgn0035357	MEP-1-RA:p.[Ser81Ile]; MEP-1-RB:p.[Ser81Ile]; MEP-1-RC:p.[Ser81Ile]; MEP-1-RD:p.[Ser81Ile]; MEP-1-RE:p.[Ser81Ile]; MEP-1-RF:p.[Ser81Ile]; MEP-1-RG:p.[Ser81Ile]				1	0.225	0.483163	0.645918	0.000370387	0.0136536	0.0831401
missense	-2	3L	2637368	AT	CC	FBgn0035357	MEP-1-RA:p.[Asp79Ala]; MEP-1-RB:p.[Asp79Ala]; MEP-1-RC:p.[Asp79Ala]; MEP-1-RD:p.[Asp79Ala]; MEP-1-RE:p.[Asp79Ala]; MEP-1-RF:p.[Asp79Ala]; MEP-1-RG:p.[Asp79Ala]				0.988507	0.186815	0.36878	0.710709	0.000224855	0.0038946	0.435114
missense	-2	3L	4484038	C	A	FBgn0035552	CG11350-RB:p.Ala377Asp				0.962963	0.28571	0	0.820108	0.00105475	1.32e-05	0.374496
missense	-2	3L	4536013	C	T	FBgn0035557	CG11353-RA:p.[Ser7Phe]; CG11353-RB:p.[Ser7Phe]				0.16667	0.76508	0.585713	-0.508727	0.00802966	0.00792827	0.33087
missense	-2	3L	5866992	A	G	FBgn0035642	CG18586-RB:p.Glu68Gly				0.228333	0.91111	0.720773	-0.587608	0.00168097	0.0436935	0.313828
missense	-2	3L	6194789	TG	GT	FBgn0035693	CG8219-RA:p.Leu335Cys				1	0.33333	0.657037	0.504817	0.00243202	0.00928459	0.0569028
missense	-2	3L	7055802	C	A	FBgn0035733	CG8641-RA:p.Ser58Ile				0.986667	0.17647	0	0.898432	0.000102964	1.95e-07	0.374917
missense	-2	3L	7316394	T	A	FBgn0035761	RhoGEF4-RA:p.Gln6Leu				0.95	0	0	0.95	4.52e-05	4.52e-05	0.632167
missense	-2	3L	7459438	C	A	FBgn0035786	CG42661-RA:p.Pro18His				0	0.53267	0.632443	-0.582557	0.0183489	0.0116631	0.64344
missense	-2	3L	7464738	G	T	FBgn0035788	CG8541-RA:p.Cys10Phe				1	0.427947	0.357987	0.607033	0.0200013	3.92e-05	0.677088
missense	-2	3L	7479174	T	G	FBgn0035789	mthl6-RA:p.Leu2Arg				1	0.1625	0	0.91875	0.000108464	5.9e-14	0.1377
missense	-2	3L	7479315	T	C	FBgn0035789	mthl6-RA:p.Ile49Thr				1	0.16228	0	0.91886	7.9e-05	4.33e-14	0.117377
missense	-2	3L	7550208	G	A	FBgn0035797	CG14837-RC:p.Ala348Val				1	0.815807	0.51412	0.335037	0.00134091	0.0210565	0.0873342
missense	-2	3L	8128722	A	G	FBgn0035842	CG7504-RB:p.Ile486Thr				1	0.4899	0.4596	0.52525	0.0343002	0.0130422	0.46849
missense	-2	3L	8211909	G	A	FBgn0035858	CG13674-RA:p.Ala15Val				0.979167	0	0.34091	0.808712	1.26e-06	0.00702927	0.19455
missense	-2	3L	9523646	C	T	FBgn0036009	Or67a-RA:p.Ala209Val				1	0.26611	0.212333	0.760778	0.000797643	3.06e-06	0.724353
missense	-2	3L	9601834	T	C	FBgn0036017	CG3280-RD:p.[Leu828Ser]; CG3280-RC:p.[Leu783Ser]				1	0.16667	0.284507	0.774412	7.1e-05	0.00134151	0.0963346
missense	-2	3L	11167719	C	A	FBgn0036143	CG14142-RC:p.Pro172His				0.97436	0.183825	0.3125	0.726197	0.000374356	0.00124982	0.890714
missense	-2	3L	11983946	A	G	FBgn0036236	CG6931-RA:p.Arg22Gly				0.2382	0	0	0.2382	0.00165743	0.00166422	0.212332
missense	-2	3L	12118771	G	A	FBgn0036250	Ir68b-RA:p.Ser575Phe				0.117577	0	0	0.117577	0.000235133	0.000233523	0.396947
missense	-2	3L	12120110	C	T	FBgn0036250	Ir68b-RA:p.Gly129Arg				0	0.617133	1	-0.808567	0.0333897	1.66e-14	0.119485
missense	-2	3L	13371777	G	A	FBgn0036350	SNCF-RA:p.Gly19Glu				0	0.37143	0.652243	-0.511837	0.0113882	0.00120288	0.0719246
missense	-2	3L	13429447	A	G	FBgn0036361	CG10154-RA:p.[Val200Ala]; CG10154-RB:p.[Val200Ala]				0.838253	0.32143	0.419297	0.46789	0.0180979	0.0372059	0.629686
missense	-2	3L	13457033	A	G	FBgn0036368	CG10738-RC:p.[Arg825Gly]; CG10738-RF:p.[Arg812Gly]; CG10738-RD:p.[Arg827Gly]; CG10738-RE:p.[Arg814Gly]				0.450123	0	0	0.450123	0.0214905	0.0214967	0.846821
missense	-2	3L	13963497	T	C	FBgn0036389	ssp2-RA:p.Ile616Thr				1	0.638047	0.685843	0.338055	2.36e-05	0.00984775	0.530923
missense	-2	3L	13962492	C	T	FBgn0036389	ssp2-RA:p.Ala281Val				0.891667	0	0	0.891667	0.00010657	0.000106553	0.873703
missense	-2	3L	13961039	T	C	FBgn0036389	Nxf3-RA:p.Val375Ala				0.815127	0	0	0.815127	0.00250302	0.00250216	0.81126
missense	-2	3L	14077698	TC	CA	FBgn0036410	CG8100-RA:p.Val291Ala				0.36389	0.09091	0	0.318435	0.000427023	8.74e-07	0.374065
missense	-2	3L	14974004	G	A	FBgn0036459	CG3349-RA:p.Val266Met				0.400017	0	0	0.400017	0.0262404	0.0262446	0.926662
missense	-2	3L	14975117	A	T	FBgn0036459	CG3349-RA:p.Asn637Tyr				0.637713	0.14286	0.206257	0.463155	0.00160921	0.00869342	0.122506
missense	-2	3L	15148740	A	G	FBgn0036486	Msh6-RA:p.Ile909Thr				0.097285	0.307497	0.421207	-0.267067	0.0103177	0.0206832	0.31316
missense	-2	3L	15605420	T	G	FBgn0036520	CG13449-RA:p.Asp103Ala				1	0.38158	0.32582	0.6463	0.00667697	1.65e-06	0.649081
missense	-2	3L	16283638	G	T	FBgn0036596	CG13045-RB:p.Ala87Asp				0.47786	0	0	0.47786	6.12e-05	6.11e-05	0.354722
missense	-2	3L	16301312	A	G	FBgn0036602	CG13042-RA:p.Ile47Thr				0.565687	0	0	0.565687	0.00657824	0.00657328	0.605749
missense	-2	3L	16334700	C	T	FBgn0036612	CG4998-RA:p.[Ser386Phe]; CG4998-RB:p.[Ser386Phe]				0.430623	0	0	0.430623	0.000223804	0.000223923	0.875785
missense	-2	3L	16356153	A	C	FBgn0036617	Cpr72Ea-RA:p.His135Pro				0.43456	0	0	0.43456	0.048025	0.0480904	0.335229
missense	-2	3L	16358398	A	T	FBgn0036618	Cpr72Eb-RA:p.Gln101Leu				0.380813	0	0	0.380813	0.0184362	0.0184266	0.822666
missense	-2	3L	17366161	C	T	FBgn0036715	Cad74A-RA:p.[Val391Met]; Cad74A-RB:p.[Val391Met]				0.411723	0.27778	0	0.272833	0.0328737	0.000376222	0.373106
missense	-2	3L	17366092	T	C	FBgn0036715	Cad74A-RA:p.[Arg414Gly]; Cad74A-RB:p.[Arg414Gly]				0.47222	0.16299	0.23077	0.27534	0.0187905	0.0205496	0.759522
missense	-2	3L	17375378	A	T	FBgn0036716	CG13728-RA:p.Tyr53Asn				0.346667	0.17647	0	0.258432	0.0231326	0.00321425	0.377847
missense	-2	3L	17373370	G	T	FBgn0036716	CG13728-RA:p.Ala722Asp				0.403487	0	0	0.403487	0.00110658	0.00110301	0.364284
missense	-2	3L	17378803	G	A	FBgn0036717	CG13731-RB:p.Thr235Ile				0.610383	0.244755	0	0.488006	0.0225038	0.00206931	0.14174
missense	-2	3L	18195849	T	C	FBgn0036782	CG7320-RA:p.Val329Ala				0.816237	0.281367	0.28968	0.530713	0.0191936	0.00728293	0.936278
missense	-2	3L	18857566	T	C	FBgn0036817	CG6865-RA:p.Val73Ala				1	0.44375	0.154765	0.700743	0.0260906	6.58e-05	0.412388
missense	-2	3L	19273878	A	C	FBgn0036861	CG14089-RA:p.Leu8Arg				0	0.459887	0.630247	-0.545067	0.0213264	0.00609143	0.378855
missense	-2	3L	19479091	C	T	FBgn0036874	CG9472-RA:p.Cys160Tyr				1	0.487737	0.42857	0.541847	0.011325	0.00389513	0.133824
missense	-2	3L	20363718	C	A	FBgn0036979	CG13247-RA:p.Pro18His				0.522703	0	0	0.522703	0.0210793	0.0211202	0.28437
missense	-2	3L	20799441	A	C	FBgn0037025	Spc105R-RA:p.Asp1870Ala				0.308037	1	1	-0.691963	0.00156533	0.0015642	0.665294
missense	-2	3L	20795721	A	G	FBgn0037025	Spc105R-RA:p.Arg651Gly				0	0.636507	0.54525	-0.590878	0.0115345	0.000669628	0.586891
missense	-2	3L	20795272	C	T	FBgn0037025	Spc105R-RA:p.Ala501Val				0	0.531007	0.738887	-0.634947	0.0029938	0.000705925	0.141176
missense	-2	3L	22576297	T	A	FBgn0037171	CG14459-RB:p.Gln90Leu				0.23559	0.11905	0.15385	0.09914	0.0331718	0.0321682	0.695983
missense	-2	3R	4378334	T	C	FBgn0037594	Or85d-RA:p.Leu2Ser				1	0.319793	0.34157	0.669318	0.00296927	0.00560425	0.898637
missense	-2	3R	4891103	T	C	FBgn0037661	Ada-RA:p.Phe48Ser				0.72149	0	0.16667	0.638155	0.00312848	0.00618383	0.375013
missense	-2	3R	5155977	G	A	FBgn0037677	CG12951-RA:p.Ala24Val				0.16423	0	0	0.16423	0.0156046	0.0155779	0.753839
missense	-2	3R	6623124	G	A	FBgn0037836	CG14692-RC:p.Ser1766Phe				0.602187	0.16888	0.260415	0.387539	0.00677896	0.025386	0.612176
missense	-2	3R	6623328	G	A	FBgn0037836	CG14692-RC:p.Ser1698Leu				0.829007	0.349183	0.30769	0.50057	0.00692086	0.00573464	0.0850637
missense	-2	3R	6622692	A	G	FBgn0037836	CG14692-RC:p.Phe1910Ser				0.335977	0.82218	0.850597	-0.500412	0.0122178	0.0178749	0.780386
missense	-2	3R	6622719	A	G	FBgn0037836	CG14692-RC:p.Ile1901Thr				0.34503	0.83053	0.844853	-0.492662	0.028387	0.0348571	0.907142
missense	-2	3R	7801260	G	A	FBgn0037972	CG10005-RA:p.Ser225Phe				0.915343	0.21429	0	0.808198	0.000538387	3e-05	0.372408
missense	-2	3R	8138006	G	A	FBgn0038011	CG4066-RA:p.Gly311Glu				0.81	0.245333	0.3475	0.513583	0.0189064	0.0189636	0.938329
missense	-2	3R	8253437	C	T	FBgn0038045	sas-RA:p.Ala1682Val				1	0.341637	0.285877	0.686243	0.00961262	0.000203315	0.733177
missense	-2	3R	8264461	G	A	FBgn0038051	CG17207-RA:p.Ala111Val				0	0.662587	0.621083	-0.641835	0.000408517	0.00278804	0.733731
missense	-2	3R	8498410	C	T	FBgn0038073	CG14395-RB:p.[Ala766Val]; CG14395-RC:p.[Ala766Val]				0.660333	0	0	0.660333	0.00311752	0.00311067	0.0903645
missense	-2	3R	8736747	G	A	FBgn0038090	CG10909-RA:p.Ser69Phe				0	0.33387	0.386557	-0.360213	0.0040288	0.0139507	0.651078
missense	-2	3R	8736759	A	C	FBgn0038090	CG10909-RA:p.Ile65Ser				0	0.343357	0.421213	-0.382285	0.00141919	0.00996248	0.48395
missense	-2	3R	9039848	T	C	FBgn0038126	CG8483-RA:p.Glu18Gly				0.600127	0.208335	0.14359	0.424164	0.00366967	0.000633036	0.647742
missense	-2	3R	9116925	T	C	FBgn0038133	Osi22-RA:p.Val163Ala				0.55609	0	0	0.55609	0.00233453	0.00233359	0.721455
missense	-2	3R	9441988	C	T	FBgn0038161	CG9269-RA:p.Ala88Val				0.602563	0	0.13636	0.534383	0.00199492	0.00430887	0.369297
missense	-2	3R	9789469	A	G	FBgn0038191	CG9925-RA:p.Val43Ala				0.7396	0	0	0.7396	0.000919261	0.000918161	0.334312
missense	-2	3R	10128761	G	T	FBgn0038221	CG3259-RA:p.Ser154Ile				0.501517	0	0.135965	0.433534	5.29e-05	0.00183015	0.135883
missense	-2	3R	12324596	T	C	FBgn0038440	Gr89a-RA:p.Glu29Gly				0.394983	0.23077	0	0.279598	0.0434068	0.00685515	0.374831
missense	-2	3R	12984545	C	A	FBgn0038492	Mur89F-RA:p.Ser371Ile				0.97436	0	0	0.97436	2.78e-06	2.78e-06	0.257748
missense	-2	3R	13265131	A	T	FBgn0038511	CG14331-RB:p.[Leu183Gln]; CG14331-RC:p.[Leu247Gln]				1	0.1672	0.1	0.8664	4.46e-05	8.23e-06	0.0707632
missense	-2	3R	13453500	G	A	FBgn0038531	CG14325-RB:p.Val140Met				0.941177	0	0	0.941177	9.01e-05	9.02e-05	0.230428
missense	-2	3R	13625980	A	G	FBgn0038547	CG17803-RA:p.Val210Ala				1	0	0	1	9.33e-15	9.95e-15	0.190372
missense	-2	3R	14191044	T	G	FBgn0038608	WRNexo-RA:p.[Asp154Ala]; WRNexo-RB:p.[Asp155Ala]				0.678037	0.15341	0.3783	0.412182	0.00211006	0.0495724	0.374159
missense	-2	3R	14386268	GG	CA	FBgn0038626	CG7691-RA:p.Gly71His				0.627313	0	0	0.627313	0.0280855	0.0281335	0.25038
missense	-2	3R	14515964	A	G	FBgn0038642	Muc91C-RA:p.Val142Ala				1	0.46285	0.681817	0.427667	0.0192746	0.0499564	0.157887
missense	-2	3R	15740321	C	G	FBgn0038749	CG42508-RA:p.Gly76Arg				0	0.80392	1	-0.90196	0.00472588	2.25e-15	0.237546
missense	-2	3R	15740275	C	A	FBgn0038749	CG42508-RA:p.Arg91Leu				0	0.833333	1	-0.916667	0.000785824	2.29e-14	0.140556
missense	-2	3R	16870262	G	C	FBgn0038847	CG12278-RA:p.Gly150Arg				0.45524	0	0	0.45524	0.00237745	0.00238054	0.484376
missense	-2	3R	16899742	G	T	FBgn0038851	dmrt93B-RA:p.Ser5Ile				0.346057	0	0	0.346057	0.000727982	0.000723774	0.0642618
missense	-2	3R	18219181	GG	AT	FBgn0038958	CG13857-RA:p.Ala20Asp				0.741113	0.23077	0.299145	0.476156	0.00473953	0.0262062	0.461596
missense	-2	3R	18232136	A	G	FBgn0038960	CG13855-RA:p.Glu127Gly				1	0.732967	0.54762	0.359707	0.00340975	0.0311561	0.139014
missense	-2	3R	18850878	GAC	CGT	FBgn0039039	lmd-RB:p.Val432Thr				0.716117	0	0	0.716117	0.00060699	0.000607614	0.371041
missense	-2	3R	18851992	C	T	FBgn0039039	lmd-RB:p.Gly61Glu				0.798507	0	0	0.798507	0.000381148	0.000380828	0.575874
missense	-2	3R	18847498	G	A	FBgn0039039	lmd-RB:p.Ala794Val				0.70471	0	0	0.70471	5.94e-05	5.95e-05	0.430134
missense	-2	3R	19364064	A	G	FBgn0039087	CG10168-RA:p.Val107Ala				0.31228	0	0	0.31228	0.00812272	0.00811445	0.798344
missense	-2	3R	19421399	C	T	FBgn0039092	CG16723-RB:p.Gly179Glu				1	0.60171	0.459253	0.469518	0.0170594	0.0329385	0.509252
missense	-2	3R	19422750	A	T	FBgn0039093	CG10183-RB:p.Tyr550Asn				1	0.583333	0.390027	0.51332	0.00840553	0.00384657	0.2203
missense	-2	3R	20342562	T	C	FBgn0039201	CG13617-RA:p.Val377Ala				0.17381	0.81312	0.98	-0.72275	0.0116499	0.000191884	0.320303
missense	-2	3R	20964423	G	C	FBgn0039283	danr-RA:p.Gly157Arg				0.755557	0.37506	0.22917	0.453442	0.0208929	0.0084467	0.0835443
missense	-2	3R	21050842	C	A	FBgn0039294	Cad96Cb-RC:p.[Ser601Ile]; Cad96Cb-RB:p.[Ser602Ile]				0.124917	0	0	0.124917	0.0221134	0.0221733	0.775551
missense	-2	3R	21495774	G	A	FBgn0039354	Lgr3-RA:p.Val244Met				0.946423	0	0	0.946423	1.78e-05	1.78e-05	0.666767
missense	-2	3R	21504048	G	A	FBgn0039355	CG4730-RA:p.Ala71Val				0.93795	0	0	0.93795	7.28e-06	7.28e-06	0.883078
missense	-2	3R	21883540	C	G	FBgn0039405	CG42498-RA:p.[Gly103Arg]				0	1	0.958487	-0.979243	4.24e-15	1.8e-06	0.136113
missense	-2	3R	21883199	G	A	FBgn0039405	CG14550-RA:p.Ser116Phe				0.714363	0	0	0.714363	0.00385738	0.00385963	0.520725
missense	-2	3R	22452321	AC	GA	FBgn0039438	TwdlO-RA:p.Ser33Ile				0	0.351413	0.345753	-0.348583	0.0389923	0.00541403	0.967008
missense	-2	3R	22455718	T	C	FBgn0039440	TwdlJ-RB:p.Val14Ala				1	0.448075	0	0.775962	0.011981	1.98e-14	0.13594
missense	-2	3R	22542395	T	C	FBgn0039449	CG6425-RA:p.Glu178Gly				0.911617	0	0	0.911617	6.44e-05	6.43e-05	0.182542
missense	-2	3R	24178834	T	C	FBgn0039582	Or98b-RA:p.Ile255Thr				0.354167	0	0	0.354167	0.0368997	0.0369955	0.221335
missense	-2	3R	25498290	C	T	FBgn0039679	ppk19-RA:p.Ala38Val				0.147153	0	0	0.147153	0.00256018	0.00255897	0.923773
missense	-2	3R	26317055	G	C	FBgn0039779	PH4alphaSG2-RA:p.[Gly363Arg]; PH4alphaSG2-RB:p.[Gly137Arg]				0	0.602127	0.60845	-0.605288	0.00675534	0.00658325	0.971648
missense	-2	3R	26517930	C	T	FBgn0039795	Spn100A-RA:p.Ser486Phe				0.54831	0	0	0.54831	0.000764538	0.000765579	0.507879
missense	-2	2L	620560	GA	AG	FBgn0040106	lectin-21Cb-RB:p.Ser208Leu				0.202547	0	0	0.202547	0.0187638	0.0186703	0.292496
missense	-2	2L	11262260	C	A	FBgn0040232	cmet-RB:p.[Arg1877Leu]; cmet-RA:p.[Arg1932Leu]				0.310417	0	0	0.310417	0.0159886	0.0160421	0.317369
missense	-2	2L	11264860	G	T	FBgn0040232	cmet-RB:p.[Ala1070Asp]; cmet-RA:p.[Ala1125Asp]				0.433127	0	0	0.433127	0.000711433	0.000711078	0.809272
missense	-2	2L	11271368	G	A	FBgn0040233	cana-RA:p.Gly427Glu				0.161267	0	0	0.161267	0.0178152	0.0179688	0.139113
missense	-2	2L	11270924	G	A	FBgn0040233	cana-RA:p.Gly279Glu				0.21224	0	0	0.21224	0.0131413	0.0131157	0.68843
missense	-2	2L	11276747	C	T	FBgn0040233	cana-RA:p.Ala1777Val				0.285237	0	0	0.285237	0.000148302	0.000148072	0.61529
missense	-2	3L	8167576	G	T	FBgn0040290	RecQ4-RA:p.Pro443His				0.907203	0.15385	0.34375	0.658403	0.000597597	0.00948614	0.262738
missense	-2	3L	8167732	G	C	FBgn0040290	RecQ4-RA:p.Pro391Arg				0.875	0.15385	0.201705	0.697223	0.0005155	0.00270697	0.476454
missense	-2	3L	14939023	A	G	FBgn0040487	BobA-RA:p.Ile49Thr				0.491343	0.18836	0.190883	0.301722	0.0313451	0.0399364	0.967203
missense	-2	2L	1945396	G	A	FBgn0040719	CG15357-RA:p.Ala86Val				1	0.36603	0	0.816985	0.00345145	5.66e-15	0.116017
missense	-2	3L	16320668	T	C	FBgn0040795	CG13038-RA:p.Met12Val				0.554827	0.17647	0.233175	0.350004	0.00703031	0.0284342	0.419411
missense	-2	3L	16266315	C	A	FBgn0040797	CG13066-RB:p.Ala17Asp				0.465773	0	0	0.465773	2.28e-05	2.28e-05	0.19766
missense	-2	3L	10093103	G	T	FBgn0040823	CG42826-RA:p.Ala259Asp				0.979797	0.395455	0	0.782069	0.014887	1.04e-06	0.20334
missense	-2	3L	10080771	C	A	FBgn0040823	CG14160-RA:p.Trp308Leu				0.845147	0	0	0.845147	9.53e-06	9.53e-06	0.744798
missense	-2	X	8291756	G	A	FBgn0040928	CG15345-RA:p.Ser40Leu				0.402597	0	0	0.402597	0.0483235	0.0483155	0.868604
missense	-2	2L	15889543	G	A	FBgn0041183	TepI-RA:p.Ser1075Phe				0.594517	0	0.16	0.514517	8.64e-05	0.00112089	0.372748
missense	-2	2L	12399586	G	C	FBgn0041195	Pkd2-RA:p.Gly381Arg				0.94203	0.311843	0.25	0.661108	0.0206978	0.00107871	0.27455
missense	-2	2L	2671508	A	G	FBgn0041248	Gr23a-RB:p.Arg196Gly				0.176843	0	0	0.176843	0.00352849	0.00350553	0.295506
missense	-2	3R	24857270	G	C	FBgn0041780	Ssl2-RA:p.Cys268Trp				0.985507	0.490743	0.401885	0.539192	0.000316129	0.00601721	0.186564
missense	-2	2R	17686619	G	A	FBgn0042098	CG18735-RA:p.Ala18Val				0.73842	0	0	0.73842	0.000697078	0.000696924	0.823819
missense	-2	3R	6228024	G	A	FBgn0045443	mthl11-RA:p.[Gly373Glu]; mthl11-RB:p.[Gly356Glu]				0.988097	0	0	0.988097	1.25e-07	1.26e-07	0.712401
missense	-2	2L	1791615	A	T	FBgn0045499	Gr22c-RA:p.Leu70Gln				1	0.511435	0	0.744282	0.0216422	8.05e-15	0.131219
missense	-2	2L	1792901	A	G	FBgn0045500	Gr22b-RA:p.Ile123Thr				1	0	0.16667	0.916665	2.82e-14	7.04e-05	0.373441
missense	-2	2L	1792363	G	C	FBgn0045500	Gr22b-RA:p.Cys302Trp				1	0	0	1	6.57e-15	2.55e-15	0.0714442
missense	-2	2R	19232519	G	T	FBgn0046253	CG3502-RB:p.Ser447Tyr				1	0.352085	0.530833	0.558541	0.00387226	0.0387825	0.213321
missense	-2	2R	10259136	C	T	FBgn0050072	Obp50b-RB:p.Ala110Val				0.706927	0.240385	0.22222	0.475624	0.0118092	0.00632381	0.47365
missense	-2	2R	13382078	GG	AA	FBgn0050103	CG30103-RA:p.Gly210Asn				0.94384	0.321083	0	0.783298	0.00818053	1.34e-05	0.0584991
missense	-2	2R	15213466	C	A	FBgn0050127	CG30127-RB:p.Arg892Leu				0.96	0.588763	0.454093	0.438572	0.0470011	0.00376345	0.404386
missense	-2	2R	18721457	T	C	FBgn0050265	CG30265-RA:p.Ile325Thr				1	0	0.14286	0.92857	8.74e-14	3.74e-05	0.374315
missense	-2	2R	18721661	CG	TT	FBgn0050265	CG30265-RA:p.Ala393Val				0.107983	0	0	0.107983	0.00684013	0.00673663	0.072644
missense	-2	2R	4153973	T	C	FBgn0050375	CG30375-RA:p.Tyr223Cys				0.392737	0	0	0.392737	0.00528059	0.00528683	0.648355
missense	-2	2R	3794786	C	T	FBgn0050377	CG30377-RA:p.Ala776Val				0.230957	0	0	0.230957	0.0444695	0.0445122	0.82387
missense	-2	2R	11390299	G	C	FBgn0050469	Ir52b-RB:p.Trp325Cys				0	0.539003	0.385413	-0.462208	0.00358009	5.56e-06	0.157646
missense	-2	2R	9735055	C	T	FBgn0050484	CG30484-RA:p.Thr233Ile				0	0.92857	1	-0.964285	0.000202669	1.91e-14	0.373663
missense	-2	3R	27220108	T	C	FBgn0051002	CG31002-RA:p.Glu270Gly				0.720317	0	0	0.720317	0.00103434	0.00103442	0.960806
missense	-2	3R	26432005	T	C	FBgn0051016	CG31016-RB:p.Ile30Thr				1	0.354037	0.455167	0.595398	9.86e-05	0.00862969	0.449561
missense	-2	3R	26433044	T	C	FBgn0051016	CG31016-RB:p.Ile304Thr				0	0.56886	0.56169	-0.565275	0.0266157	0.00734741	0.974003
missense	-2	3R	26431990	G	C	FBgn0051016	CG31016-RB:p.Arg25Pro				0.699433	0.23077	0	0.584048	0.00768212	0.00211423	0.376698
missense	-2	3R	17940176	T	G	FBgn0051164	Ir94a-RA:p.Leu343Arg				1	0.11905	0.583335	0.648807	2.62e-05	0.0379904	0.204985
missense	-2	3R	26328904	A	G	FBgn0051371	CG31371-RB:p.[Ile60Thr]; CG31371-RC:p.[Ile60Thr]				0.604297	0.27917	0	0.464712	0.0171832	0.000307077	0.116956
missense	-2	3R	26327936	C	T	FBgn0051371	CG31371-RB:p.[Gly293Glu]; CG31371-RC:p.[Gly293Glu]				0.288337	0.7875	0.62889	-0.419858	0.0266711	0.0258035	0.328165
missense	-2	3R	17944401	A	C	FBgn0051423	Ir94c-RA:p.Leu368Arg				0	1	1	-1	6.88e-15	8.8e-15	0.897525
missense	-2	3R	17942050	C	T	FBgn0051424	Ir94b-RA:p.Val267Met				1	0.294115	0.15015	0.777868	0.0014923	8.29e-05	0.460194
missense	-2	3R	17941491	T	C	FBgn0051424	Ir94b-RA:p.Glu453Gly				0	0.906203	0.958333	-0.932268	7.92e-05	2.37e-06	0.433057
missense	-2	3R	2133580	T	G	FBgn0051556	CG31556-RA:p.Asp387Ala				0.92857	0.315385	0.416987	0.562384	0.00469629	0.0158717	0.278097
missense	-2	2L	21773495	G	A	FBgn0051612	CG31612-RA:p.[Ser649Leu]; CG31612-RB:p.[Ser649Leu]				0.703703	0	0	0.703703	0.00972176	0.00973602	0.245961
missense	-2	2L	21773486	T	G	FBgn0051612	CG31612-RA:p.[His652Pro]; CG31612-RB:p.[His652Pro]				0.72549	0	0	0.72549	0.00679036	0.00680313	0.137793
missense	-2	2L	3914922	A	G	FBgn0051774	fred-RH:p.Ile1258Thr				0.504207	0	0	0.504207	0.0389719	0.0389917	0.803087
missense	-2	2L	8443748	C	T	FBgn0051897	CG31897-RA:p.Thr369Ile				0	0.379563	0.292973	-0.336268	0.0015666	0.030099	0.441059
missense	-2	2L	8443205	C	T	FBgn0051897	CG31897-RA:p.Ser188Leu				0.85364	0.5	0.25294	0.47717	0.0148847	0.00161774	0.994095
missense	-2	2L	8443958	T	C	FBgn0051897	CG31897-RA:p.Phe439Ser				0	0.508713	0.27778	-0.393247	0.00224979	0.0194364	0.0898509
missense	-2	2L	8443562	T	C	FBgn0051897	CG31897-RA:p.Leu307Ser				0.917727	1	1	-0.0822733	0.0253067	0.025594	0.369631
missense	-2	2L	8443337	T	A	FBgn0051897	CG31897-RA:p.Leu232Gln				0.840793	0.261905	0.267855	0.575913	0.0048443	0.00413069	0.979587
missense	-2	2L	8443166	T	C	FBgn0051897	CG31897-RA:p.Leu175Ser				0.823097	0.15789	0.207167	0.640568	0.000174067	0.00123637	0.15875
missense	-2	2L	8443475	A	G	FBgn0051897	CG31897-RA:p.Glu278Gly				0	0.757937	0.38648	-0.572208	0.0125101	0.0104734	0.129811
missense	-2	2L	8443891	A	G	FBgn0051897	CG31897-RA:p.Arg417Gly				0	0.338383	0.349207	-0.343795	0.0211065	0.00236255	0.923552
missense	-2	2L	1822706	C	A	FBgn0051933	CG31933-RA:p.Gly196Trp				1	0.4875	0	0.75625	0.0202885	3.63e-14	0.146651
missense	-2	3L	11725808	A	G	FBgn0052087	CG32087-RA:p.Tyr162Cys				0.944443	0	0	0.944443	7.03e-05	7.03e-05	0.448038
missense	-2	3L	12767995	A	G	FBgn0052106	CG32106-RD:p.[Val1099Ala]; CG32106-RE:p.[Val1115Ala]				1	0.477777	0	0.761112	0.0494831	6.81e-15	0.0632062
missense	-2	3L	12768356	T	C	FBgn0052106	CG32106-RD:p.[Met979Val]; CG32106-RE:p.[Met995Val]				1	0.46086	0.29167	0.623735	0.00366327	0.000744771	0.0503569
missense	-2	3L	12768076	A	C	FBgn0052106	CG32106-RD:p.[Leu1072Arg]; CG32106-RE:p.[Leu1088Arg]				1	0.444443	0.2	0.677778	0.00978021	0.000152032	0.0510849
missense	-2	3L	12770146	C	T	FBgn0052106	CG32106-RD:p.[Gly420Glu]; CG32106-RE:p.[Gly436Glu]				1	0.507145	0.08333	0.704762	0.0329397	3.99e-06	0.211573
missense	-2	3L	4145737	A	G	FBgn0052260	CG32260-RA:p.Tyr538Cys				1	0.56027	0.51696	0.461385	0.0419388	0.0382575	0.852363
missense	-2	3L	7862888	T	A	FBgn0052365	CG32365-RA:p.Leu66Gln				0.33413	0.2	0	0.23413	0.0303815	0.0019978	0.376783
missense	-2	X	20332545	C	T	FBgn0052506	CG32506-RC:p.Ala131Val				1	0	0	1	2.52e-14	1.91e-14	0.841257
missense	-2	2L	14811531	C	A	FBgn0053309	CG33309-RA:p.Pro222His				0	0.463587	0.504577	-0.484082	0.00509151	0.00240271	0.731042
missense	-2	3R	13243480	T	C	FBgn0053333	CG33333-RA:p.Val92Ala				0	0.29253	0.254547	-0.273538	0.0369207	0.0246041	0.767165
missense	-2	2R	8297588	T	C	FBgn0053626	CG33626-RB:p.Ile2Thr				0	0.916667	1	-0.958333	0.000385948	1.29e-14	0.374332
missense	-2	3L	9505585	C	A	FBgn0053703	CG33703-RA:p.Ser59Ile				0	0.46061	0.53592	-0.498265	0.00700393	0.0217243	0.683522
missense	-2	3L	16163000	A	G	FBgn0053796	CG33796-RA:p.Ile52Thr				0.34831	0	0	0.34831	0.0205321	0.020515	0.679766
missense	-2	3R	3246220	CC	GT	FBgn0054023	CG34023-RA:p.Pro55Val				0	0.354167	0.515827	-0.434997	0.00916739	0.000412724	0.142818
missense	-2	3R	20933812	G	A	FBgn0054027	CG34027-RA:p.Thr256Ile				0	0.459013	0.718783	-0.588898	0.0189785	8.03e-05	0.112828
missense	-2	3R	20930325	A	C	FBgn0054027	CG34027-RA:p.Phe1266Cys				1	0.416637	0.307937	0.637713	0.000562729	0.000359825	0.268878
missense	-2	3R	9539260	T	C	FBgn0054044	CG34044-RA:p.Glu5Gly				0.33922	0.13636	0	0.27104	0.0482038	0.0226139	0.374677
missense	-2	3L	897703	C	T	FBgn0054057	CG34057-RB:p.[Thr63Ile]; CG34057-RA:p.[Thr74Ile]				0.347733	0	0	0.347733	0.00239508	0.00238519	0.150782
missense	-2	2L	9774909	T	C	FBgn0065109	ppk11-RA:p.Glu41Gly				0.97701	0	0	0.97701	1.85e-06	1.85e-06	0.299118
missense	-2	2L	22038132	C	T	FBgn0084001	CG41434-RA:p.Ser34Phe				0	0.817403	1	-0.908702	0.000961806	2.54e-14	0.124064
missense	-2	2R	18216978	G	A	FBgn0085236	CG34207-RA:p.Thr83Ile				1	0.36364	0	0.81818	0.00193296	2.3e-14	0.373884
missense	-2	3R	23465725	C	T	FBgn0085323	CG34294-RA:p.Cys126Tyr				1	0.55754	0.727043	0.357708	0.0143084	0.00211428	0.209097
missense	-2	3R	6484299	G	A	FBgn0085333	CG34304-RA:p.Val111Met				0.933333	0	0	0.933333	0.000151549	0.000151487	0.702011
missense	-2	3L	5496689	G	A	FBgn0085371	CG34342-RB:p.Ala569Val				0	0.531747	0.630657	-0.581202	0.0054761	0.0117804	0.59963
missense	-2	2R	4889071	G	A	FBgn0085379	CG34350-RA:p.[Thr14Ile]; CG34350-RB:p.[Thr14Ile]				0.381893	0	0	0.381893	0.000121041	0.000121125	0.684461
missense	-2	2R	17852111	TT	CC	FBgn0085398	CG34369-RA:p.Val145Ala				0.40426	0.919047	1	-0.555263	0.0418688	0.02445	0.128301
missense	-2	2L	3185049	C	T	FBgn0085422	CG34393-RA:p.Val556Met				0.759617	0	0	0.759617	0.000538218	0.0005383	0.858289
missense	-2	2L	3185009	G	A	FBgn0085422	CG34393-RA:p.Ala569Val				0.706877	0	0	0.706877	0.00570419	0.00571136	0.174507
missense	-2	3R	26475046	G	A	FBgn0085461	CG34432-RA:p.Gly53Glu				0.06452	0.680557	0.504187	-0.527852	0.00213637	0.0292808	0.357821
missense	-2	3R	24108417	TA	CG	FBgn0085465	CG34436-RA:p.Ile37Thr				0.22222	0.556547	0.442857	-0.277482	0.0375286	0.0319822	0.525971
missense	-2	2L	8527155	C	T	FBgn0085470	CG34441-RA:p.[Val269Met]; CG34441-RB:p.[Val269Met]				0	0.458147	0.41049	-0.434318	0.04396	0.00705675	0.800246
missense	-2	2R	10255308	G	A	FBgn0085471	CG34442-RA:p.Val229Met				0.623057	0	0.286685	0.479714	0.00371064	0.0375282	0.119731
missense	-2	2L	18066825	T	C	FBgn0243486	rdo-RA:p.Val414Ala				1	0.777777	0.443227	0.389498	0.0114708	0.0263593	0.119604
missense	-2	3L	8319258	C	T	FBgn0250833	CG34461-RA:p.Ala6Val				1	0.240263	0.28571	0.737013	0.000305716	0.000679823	0.27555
missense	-2	2R	20403384	T	G	FBgn0259185	Ir60b-RA:p.Ile46Ser				0.944443	0.584327	0.477633	0.413463	0.0067443	0.00205567	0.125758
missense	-2	3L	2655054	CA	TC	FBgn0259199	CG42304-RA:p.Ala525Val				0.979167	0.56369	0.75884	0.317902	0.00690544	0.0124576	0.0993606
missense	-2	3L	2652474	G	T	FBgn0259199	CG42303-RA:p.Trp114Leu				0.977777	0	0	0.977777	1.61e-06	1.61e-06	0.518624
missense	-2	3L	2652927	C	T	FBgn0259199	CG42303-RA:p.Ala265Val				0.964287	0.71429	0.552697	0.330793	0.0392831	0.00581113	0.273141
missense	-2	3L	2022589	G	A	FBgn0259702	CG42356-RA:p.Ser268Leu				0	0.925927	1	-0.962963	0.000236131	5.49e-14	0.375026
missense	-2	3L	2022424	T	A	FBgn0259702	CG42356-RA:p.Gln323Leu				0	0.373107	0.292593	-0.33285	0.0186143	0.0329351	0.578733
missense	-2	2R	17552923	T	C	FBgn0259708	CG42363-RA:p.Val76Ala				0.272873	0	0	0.272873	0.000878581	0.000880138	0.756019
missense	-2	2L	3388101	T	C	FBgn0259950	CG42460-RA:p.Tyr79Cys				1	0.55	0	0.725	0.0353939	2.14e-14	0.144943
missense	-2	3L	4155405	G	A	FBgn0259986	nab-RC:p.[Ala434Val]; nab-RB:p.[Ala434Val]				0.575833	0	0.10345	0.524108	0.00802437	0.011508	0.370539
missense	-2	3R	25760016	A	C	FBgn0260759	CG42558-RA:p.His68Pro				0	0.497793	0.29087	-0.394332	0.0096971	0.00699754	0.163784
missense	-2	X	11790582	A	G	FBgn0260780	wisp-RA:p.Met577Val				1	0	0	1	4.72e-15	3.08e-15	0.181987
missense	-2	2R	3479885	C	T	FBgn0261385	scra-RC:p.[Thr549Ile]; scra-RB:p.[Thr549Ile]; scra-RA:p.[Thr522Ile]				1	0.165215	0.607145	0.61382	0.00011094	0.0431151	0.236796
missense	-2	3L	17815396	G	A	FBgn0261401	Ir75c-RA:p.Thr116Ile				1	0.307695	0.302753	0.694776	0.00206189	0.000626557	0.5028
missense	-2	2L	14729491	C	G	FBgn0261571	CG42685-RA:p.Gly171Arg				1	0	0.37963	0.810185	8.53e-14	0.0141121	0.0636345
missense	-2	2R	15833957	A	G	FBgn0261581	CG42691-RA:p.Val58Ala				0	0.97619	1	-0.988095	2.08e-06	4.53e-14	0.368313
missense	-2	3L	616451	GT	CG	FBgn0261636	CG42719-RA:p.His40Pro				0.5518	0	0	0.5518	2.22e-07	2.22e-07	0.336879
missense	-2	2L	6127972	A	G	FBgn0261683	tectonic-RA:p.Val638Ala				0.674603	0	0	0.674603	0.014293	0.0143121	0.490566
missense	-2	2R	14265079	G	A	FBgn0261700	CG42736-RA:p.Gly30Arg				0.21859	0	0	0.21859	0.0126575	0.0126122	0.532722
missense	-2	2L	10919373	C	T	FBgn0261871	dpr2-RE:p.Val216Met				0.69595	0.301585	0	0.545157	0.0232944	0.00112115	0.143163
missense	-2	3L	17787124	G	A	FBgn0261998	CG42816-RB:p.Thr950Ile				1	0.242855	0.413673	0.671736	0.000585449	0.0032895	0.116485
missense	-2	2L	16244353	C	T	FBgn0262000	CG42818-RB:p.Thr758Ile				0.774497	0	0	0.774497	5.11e-08	5.1e-08	0.0550782
missense	-2	2L	16244839	C	T	FBgn0262000	CG42818-RB:p.Ser920Leu				0.776637	0	0	0.776637	0.000497052	0.000496343	0.196978
missense	-2	2L	16243447	C	A	FBgn0262000	CG42818-RB:p.Ser456Tyr				0.70101	0	0	0.70101	0.00015226	0.000152064	0.134778
missense	-2	2L	16245045	G	C	FBgn0262000	CG42818-RB:p.Gly970Arg				0.815473	0.17647	0.16667	0.643903	0.000362632	0.000301585	0.967969
missense	-2	2L	16244283	A	T	FBgn0262000	CG42818-RB:p.Asn735Tyr				0.789463	0	0	0.789463	7.71e-05	7.7e-05	0.431099
missense	-2	2L	16945167	C	A	FBgn0262355	CG43053-RA:p.Arg7Leu				0.910713	0	0.202385	0.809521	3.46e-05	0.000748683	0.126989
missense	-2	2L	15072388	C	G	FBgn0262526	vas-RA:p.Arg155Gly				0.138263	0	0	0.138263	0.00150564	0.00151126	0.510387
missense	-2	2R	12624873	C	A	FBgn0262564	CG43104-RA:p.Cys39Phe				0.555557	1	0.96154	-0.425213	0.00303374	0.00688923	0.377487
missense	-2	2R	7137199	C	A	FBgn0262572	CG43112-RA:p.Ser16Tyr				0	0.853383	0.755417	-0.8044	0.000132357	0.00516013	0.544262
missense	-2	3R	21822107	C	T	FBgn0262576	CG43116-RA:p.Gly96Glu				0	1	0.9	-0.95	6.96e-15	6.02e-05	0.122004
missense	-2	3R	24088956	T	A	FBgn0262588	CG43125-RA:p.Gln93Leu				0.578783	0	0	0.578783	0.00121773	0.00121726	0.841864
missense	-2	3L	71193	C	T	FBgn0262680	CG43150-RA:p.Ala63Val				0.253923	0	0	0.253923	0.022279	0.0221841	0.357106
missense	-2	3L	16099227	T	G	FBgn0262987	CG43295-RA:p.Leu68Arg				0.659297	0.30981	0.15385	0.427467	0.0347342	0.00328809	0.294069
missense	-2	2R	4304842	C	A	FBgn0262988	CG43296-RA:p.Arg95Leu				0.344253	0	0	0.344253	0.000166844	0.000166808	0.939331
missense	-2	3L	22497058	C	G	FBgn0263035	CG43330-RA:p.Gly156Arg				1	0.3875	0.27273	0.669885	0.00237271	0.000843969	0.182435
missense	-2	2L	14162274	A	G	FBgn0263037	CG43332-RA:p.Val283Ala				0	0.130947	0.16138	-0.146163	0.00456164	0.00754642	0.485452
missense	-2	2L	14162058	G	A	FBgn0263037	CG43332-RA:p.Thr355Ile				0.607493	0	0	0.607493	3.57e-05	3.57e-05	0.83822
missense	-2	2L	14162235	G	A	FBgn0263037	CG43332-RA:p.Ala296Val				0	0.241123	0.249237	-0.24518	0.0233859	3.87e-06	0.906116
missense	-2	3L	16490887	G	A	FBgn0263131	st-RA:p.Val17Met				0.85578	0.25625	0.375425	0.539943	0.00544486	0.0187968	0.650142
missense	-2	2L	16700037	T	A	FBgn0263744	CG31782-RA:p.[Asn656Tyr]; CG31782-RB:p.[Asn826Tyr]				0.762227	0	0.274475	0.624989	0.00146953	0.0131643	0.126489
missense	-2	3R	18520780	C	T	FBgn0263986	CG6969-RA:p.Ala11Val				0.942297	0	0	0.942297	4.55e-08	4.55e-08	0.526882
missense	-2	3L	2299931	G	T	FBgn0264002	DmsR-2-RA:p.[Ser451Ile]; DmsR-2-RB:p.[Ser451Ile]				1	0	0	1	2.22e-14	1.61e-14	0.500048
missense	-2	2L	1159076	C	T	FBgn0264267	Tango14-RA:p.Ala34Val				1	0	0	1	3.85e-14	6.62e-14	1
missense	-2	2L	21103661	T	C	FBgn0264353	CG9257-RA:p.Val260Ala				0	1	0.864197	-0.932098	2.3e-14	0.00314307	0.373675
missense	-2	3L	12884090	C	A	FBgn0264486	CG34032-RA:p.Pro214His				1	0.414547	0.25	0.667727	0.0362134	0.000390793	0.184177
missense	-2	3L	12883661	T	C	FBgn0264486	CG34032-RA:p.Ile71Thr				1	0.31394	0.3871	0.64948	0.00051735	0.00250397	0.271999
missense	-2	3L	11972726	T	G	FBgn0264488	CG6947-RA:p.Phe990Cys				0.257723	0	0	0.257723	0.0156482	0.0156169	0.508508
missense	-2	3L	11971487	T	A	FBgn0264488	CG6947-RA:p.Leu696Gln				0.335103	0.93611	1	-0.632952	0.00175	0.000783236	0.152778
missense	-2	X	12006401	C	T	FBgn0264675	CG2750-RB:p.Ser1588Leu				1	0.58741	0.46667	0.47296	0.0371217	0.00557147	0.401048
missense	-1	2R	14753457	C	A	FBgn0004240	Dpt-RA:p.Ser48Arg				1	0	0	1	1.16e-15	9.24e-15	0.350286
missense	-1	3L	9436446	T	C	FBgn0053926	CG33926-RA:p.Ser6Pro				1	0.295665	0	0.852167	0.00486702	6.38e-14	0.23876
missense	-1	2L	5329971	G	C	FBgn0031701	TotM-RA:p.[Cys9Ser]; TotM-RB:p.[Cys9Ser]				1	0.47123	0.69855	0.41511	0.0138844	0.000481797	0.15408
missense	-1	2L	5330009	A	C	FBgn0031701	TotM-RA:p.[Asn22His]; TotM-RB:p.[Asn22His]				1	0.530967	0.754917	0.357058	0.0263906	0.0231614	0.216188
missense	-1	3R	15430049	G	A	FBgn0038716	CG7342-RA:p.[Gly53Asp]; CG7342-RB:p.[Gly53Asp]				1	0	0	1	3.47e-14	6.44e-14	0.745503
missense	-1	3L	17638946	C	G	FBgn0262531	CG43085-RA:p.Arg179Thr				1	0.49394	0.450293	0.527883	0.0469008	0.0325429	0.868418
missense	-1	3L	17638794	C	T	FBgn0262531	CG43085-RA:p.Ala230Thr				1	0.431175	0.49525	0.536787	0.0180488	0.0306492	0.436406
missense	-1	3L	5474142	A	G	FBgn0035607	CG4835-RA:p.Thr349Ala				0	0.613633	0.49607	-0.554852	0.00183266	0.00530458	0.392557
missense	-1	3L	5475439	A	C	FBgn0035607	CG4835-RA:p.Glu781Ala				0	0.44801	0.593567	-0.520788	0.0206661	0.0317414	0.544829
missense	-1	3R	25416035	T	C	FBgn0051041	CG31041-RA:p.Thr145Ala				1	0.837037	0.78492	0.189022	0.0283662	0.0254143	0.54535
missense	-1	3L	12853756	A	T	FBgn0052107	CG32107-RB:p.Ser195Arg				1	0.621033	0.383013	0.497977	0.0125607	0.000139565	0.0720513
missense	-1	3L	12851534	T	A	FBgn0052107	CG32107-RB:p.Lys936Met				1	0.434843	0.385533	0.589812	0.0202716	0.000562303	0.780401
missense	-1	3L	12853764	G	T	FBgn0052107	CG32107-RB:p.His193Asn				1	0.44179	0.296573	0.630818	0.0034513	0.00159482	0.323097
missense	-1	3L	12852484	TT	GG	FBgn0052107	CG32107-RB:p.Glu619Ala				0	0.537517	0.507623	-0.52257	0.00539724	0.00315974	0.826144
missense	-1	3L	12853593	C	T	FBgn0052107	CG32107-RB:p.Ala250Thr				1	0.383335	0.18407	0.716298	0.00676494	0.000162473	0.448892
missense	-1	3R	6981813	C	T	FBgn0040257	Ugt86Dc-RA:p.Pro382Ser				0.497253	0.225	0	0.384753	0.0209954	0.000829945	0.120633
missense	-1	2L	8354714	T	C	FBgn0051901	Mur29B-RA:p.Ser460Pro				1	0.405557	0.28788	0.653282	0.000511208	0.000117472	0.191892
missense	-1	3R	10047198	T	C	FBgn0053109	CG33109-RA:p.Asp35Gly				0.525747	0	0.1875	0.431997	0.000359974	0.00401734	0.372241
missense	-1	2R	8558900	T	G	FBgn0261625	CG42708-RI:p.[Arg629Ser]; CG42708-RH:p.[Arg703Ser]				1	0	0	1	8.17e-14	4.21e-14	0.142209
missense	-1	2R	8559193	G	C	FBgn0261625	CG42708-RF:p.[Pro571Ala]; CG42708-RB:p.[Pro637Ala]; CG42708-RE:p.[Pro548Ala]; CG42708-RI:p.[Pro548Ala]; CG42708-RC:p.[Pro558Ala]; CG42708-RH:p.[Pro606Ala]; CG42708-RA:p.[Pro606Ala]; CG42708-RD:p.[Pro616Ala]				0	0.698247	0.7	-0.699123	0.00206676	0.00514575	0.993241
missense	-1	2L	1172267	A	T	FBgn0031317	CG5118-RA:p.Met118Lys				1	0.38889	0.125	0.743055	0.00689216	2.11e-05	0.22139
missense	-1	3L	12855517	AA	TG	FBgn0036320	CG10943-RA:p.Phe101His				0	0.483637	0.588273	-0.535955	0.0457226	0.0138466	0.658599
missense	-1	2L	8766926	G	A	FBgn0032066	CG9463-RA:p.Pro523Ser				0.75887	0	0.29394	0.6119	7.24e-09	0.0140518	0.22018
missense	-1	2R	13641455	T	C	FBgn0034276	CG6385-RA:p.Thr771Ala				0.69859	0	0	0.69859	0.000503708	0.000503726	0.989444
missense	-1	2R	13641937	C	T	FBgn0034276	CG6385-RA:p.Gly610Asp				0.784393	0	0	0.784393	0.000290947	0.000291296	0.36253
missense	-1	2L	914460	C	T	FBgn0046113	GluRIIC-RC:p.Pro94Ser				1	0.3489	0.09091	0.780095	0.00357481	5.83e-06	0.191278
missense	-1	2L	10696818	T	C	FBgn0032286	CG7300-RB:p.[Thr403Ala]; CG7300-RC:p.[Thr345Ala]				0	0.579367	0.54079	-0.560078	0.00661056	1.74e-05	0.752162
missense	-1	2L	11371991	C	A	FBgn0000287	salr-RA:p.[Pro957Gln]; salr-RB:p.[Pro957Gln]; salr-RC:p.[Pro957Gln]				0.423237	0	0	0.423237	0.0135151	0.0135069	0.815728
missense	-1	3L	17752460	T	C	FBgn0036752	CG32182-RA:p.Met399Thr				1	0.415385	0.50588	0.539367	0.0144521	0.0201556	0.820735
missense	-1	3L	17746856	T	A	FBgn0036752	Adgf-A-RA:p.[Lys188Met]; Adgf-A-RB:p.[Lys188Met]				1	0.15385	0.30862	0.768765	5.06e-05	0.00250206	0.0880179
missense	-1	2L	12425894	C	A	FBgn0032428	CG6405-RA:p.Pro266Gln				0.125	0.559537	0.74359	-0.526563	0.0256167	0.00110694	0.315471
missense	-1	2L	12425205	T	A	FBgn0032428	CG6405-RA:p.Cys73Ser				0.98148	0	0	0.98148	7.6e-07	7.6e-07	0.559873
missense	-1	3L	9610455	C	G	FBgn0002528	LanB2-RA:p.Pro37Ala				0.878677	0	0	0.878677	0.000133285	0.00013326	0.897918
missense	-1	3R	19882535	G	C	FBgn0001230	Hsp68-RA:p.Pro98Ala				0.804937	0	0	0.804937	0.00222712	0.0022275	0.779402
missense	-1	2R	18094505	G	A	FBgn0034711	CG3290-RA:p.Thr273Met				1	0.233175	0	0.883413	0.000722678	1.23e-14	0.159306
missense	-1	2R	18095411	T	C	FBgn0034711	CG3290-RA:p.Thr22Ala				0	0.752977	0.88057	-0.816773	0.00414765	0.000123722	0.418272
missense	-1	2R	18093876	G	T	FBgn0034711	CG3290-RA:p.His460Asn				0	0.248167	0.26111	-0.254638	0.0154989	0.0320897	0.906108
missense	-1	2L	10704263	A	G	FBgn0024740	CG6415-RA:p.Thr192Ala				1	0.343437	0.651703	0.50243	0.00107318	0.0206359	0.0645676
missense	-1	2L	10703658	C	T	FBgn0024740	CG6415-RA:p.Pro9Ser				1	0	0	1	1.61e-14	1.57e-15	0.296477
missense	-1	2L	10704390	C	A	FBgn0024740	CG6415-RA:p.Ala234Glu				1	0.443145	0	0.778428	0.0110411	2.22e-14	0.13404
missense	-1	3L	1312174	T	G	FBgn0035206	CG9186-RA:p.[Glu227Ala]; CG9186-RB:p.[Glu227Ala]				0.438383	0	0	0.438383	1.37e-05	1.37e-05	0.791314
missense	-1	2R	17174883	G	A	FBgn0034612	CG10505-RA:p.Pro821Ser				1	0	0	1	2.3e-14	1.1e-14	0.796978
missense	-1	2R	7296683	T	C	FBgn0050026	CG30026-RB:p.Thr77Ala				0.908833	0	0	0.908833	6.76e-07	6.76e-07	0.347196
missense	-1	3R	19975871	T	G	FBgn0046322	p38c-RA:p.Ser12Arg				1	0.49074	0	0.75463	0.014705	5.01e-15	0.116341
missense	-1	3R	18561564	A	G	FBgn0039016	Dcr-1-RA:p.Ser1694Pro				0.381173	0	0	0.381173	0.0294737	0.0294307	0.550591
missense	-1	3R	18562683	T	A	FBgn0039016	Dcr-1-RA:p.Ser1340Cys				0.58553	0	0	0.58553	0.0030837	0.00308921	0.267431
missense	-1	2L	13930941	G	A	FBgn0032536	CG42711-RA:p.Pro76Ser				0	0.32353	0.411427	-0.367478	0.0436224	0.00182126	0.51903
missense	-1	2R	8198516	C	T	FBgn0050203	CG30203-RB:p.Pro78Ser				1	0	0	1	7.19e-14	7.57e-14	0.38997
missense	-1	2R	8200942	G	A	FBgn0050203	CG30203-RB:p.Gly815Asp				1	0	0.286563	0.856718	7.46e-15	0.00396729	0.0745271
missense	-1	2R	7757104	T	C	FBgn0033661	CG13185-RC:p.[Thr5122Ala]; CG13185-RB:p.[Thr4878Ala]				0.38689	0	0	0.38689	0.00122338	0.00122001	0.275678
missense	-1	2L	18709968	C	T	FBgn0032705	Grip71-RA:p.Pro304Ser				0.243437	0	0	0.243437	0.0162469	0.0162466	1
missense	-1	2R	10764362	G	A	FBgn0033978	Cyp6a23-RA:p.Ala333Thr				0.647437	0	0.13514	0.579867	0.00101621	0.00236986	0.372779
missense	-1	2R	1496520	G	T	FBgn0039970	CG17508-RB:p.[Val29Phe]; CG17508-RA:p.[Val29Phe]				0.863783	0	0	0.863783	2.54e-05	2.54e-05	0.725131
missense	-1	3L	7760534	C	G	FBgn0023076	CG32371-RA:p.Asp280His				0	0.822223	0.72306	-0.772642	0.00105563	0.00168886	0.508622
missense	-1	2R	3816166	C	T	FBgn0033234	CG8791-RA:p.[Pro183Ser]; CG8791-RB:p.[Pro155Ser]				0.251113	0	0	0.251113	0.00510202	0.00511443	0.574717
missense	-1	2R	3816639	G	A	FBgn0033234	CG8791-RA:p.[Ala320Thr]; CG8791-RB:p.[Ala292Thr]				0.215073	0	0	0.215073	0.0120034	0.0119331	0.175867
missense	-1	2L	19385275	C	A	FBgn0032773	fon-RA:p.[Val51Phe]; fon-RB:p.[Val63Phe]; fon-RC:p.[Val63Phe]				0.776923	0	0.18182	0.686013	0.00228952	0.00678801	0.116339
missense	-1	3L	5338381	G	C	FBgn0016031	lama-RA:p.[Thr231Arg]; lama-RB:p.[Thr231Arg]; lama-RC:p.[Thr231Arg]				1	0.413683	0.49179	0.547263	0.00479354	0.0257701	0.686998
missense	-1	2R	17013588	T	C	FBgn0020312	CG4050-RA:p.[Thr313Ala]; CG4050-RB:p.[Thr313Ala]				1	0	0	1	7.04e-16	7.51e-15	0.262376
missense	-1	2R	13656000	C	G	FBgn0034279	CG18635-RA:p.Asp435His				0.845617	0	0	0.845617	6.66e-06	6.65e-06	0.515303
missense	-1	3L	11806322	G	T	FBgn0259140	CG42255-RA:p.Arg297Ser				0.66839	0.24163	0	0.547575	0.00691287	0.00026142	0.123061
missense	-1	3L	11798768	C	T	FBgn0259140	CG42255-RA:p.Ala2463Thr				0	0.830157	0.60931	-0.719733	2.45e-05	0.00255929	0.0875121
missense	-1	2L	7694936	C	T	FBgn0041182	TepII-RA:p.[Ala1079Thr]; TepII-RB:p.[Ala1058Thr]; TepII-RC:p.[Ala1056Thr]; TepII-RE:p.[Ala1047Thr]; TepII-RD:p.[Ala1067Thr]				0.837777	0.207795	0	0.733879	0.00449014	0.000815011	0.153747
missense	-1	2R	18377645	C	G	FBgn0034734	CG4554-RA:p.Ser2178Cys				0.883077	0	0	0.883077	0.000186608	0.000186657	0.716776
missense	-1	2R	18376499	T	C	FBgn0034734	CG4554-RA:p.Met1796Thr				0.17304	0	0	0.17304	0.00993	0.00999671	0.0506989
missense	-1	2R	18372373	A	G	FBgn0034734	CG4554-RA:p.Asp462Gly				0.869647	0	0	0.869647	3.26e-05	3.25e-05	0.489026
missense	-1	3L	20004564	C	T	FBgn0261574	kug-RA:p.[Thr877Met]; kug-RB:p.[Thr877Met]				0.62149	0	0	0.62149	0.00318328	0.00318824	0.474609
missense	-1	3R	18463753	G	C	FBgn0020278	loco-RD:p.Ser303Arg				0.915537	0.225	0.37171	0.617182	0.0011358	0.00760908	0.538179
missense	-1	3R	11888629	G	A	FBgn0038397	CG10185-RA:p.Thr1042Met				0.24	1	1	-0.76	0.000325213	0.000325635	0.117243
missense	-1	2L	20921946	C	G	FBgn0032904	Mtp-RA:p.Asp65His				0	0.660963	0.35643	-0.508697	0.00734213	0.00989489	0.116318
missense	-1	2R	8307404	G	A	FBgn0033733	CG8834-RB:p.Thr514Met				1	0	0	1	4.78e-14	4.18e-14	0.765966
missense	-1	3L	21199175	G	A	FBgn0037057	CG10512-RA:p.[Ala211Thr]; CG10512-RB:p.[Ala146Thr]; CG10512-RC:p.[Ala126Thr]; CG10512-RD:p.[Ala126Thr]				0.317853	0	0	0.317853	0.0376282	0.0376436	0.838453
missense	-1	X	1450567	A	G	FBgn0025390	Mur2B-RB:p.[Ser478Pro]; Mur2B-RA:p.[Ser478Pro]				1	0	0.5	0.75	4.73e-15	0.0184037	0.126531
missense	-1	3R	8864630	A	C	FBgn0038113	CG11668-RA:p.Glu132Ala				0.313493	0	0	0.313493	0.0186202	0.0186156	0.934125
missense	-1	2L	19502029	G	A	FBgn0040268	Top3alpha-RA:p.Ala1206Thr				0.772927	0.11765	0	0.714102	0.00396535	0.00268266	0.373947
missense	-1	3R	13363403	C	T	FBgn0010926	l(3)07882-RA:p.Ala710Thr				1	0.672817	0.873717	0.226733	0.0177584	0.00118207	0.0790397
missense	-1	2L	18610697	G	A	FBgn0032691	Atac2-RA:p.Thr434Met				0	0.95	0.588063	-0.769032	4.46e-05	0.00957573	0.0559263
missense	-1	2L	18611138	G	T	FBgn0032691	Atac2-RA:p.Pro287Gln				0.257767	0	0	0.257767	0.000915557	0.000914163	0.758802
missense	-1	2L	18611385	G	A	FBgn0032691	Atac2-RA:p.Pro227Ser				0.385763	0	0	0.385763	0.00281656	0.0028114	0.206593
missense	-1	2L	18610587	C	T	FBgn0032691	Atac2-RA:p.Ala471Thr				0.31067	0	0	0.31067	0.0197166	0.0196672	0.463079
missense	-1	2L	18611367	C	G	FBgn0032691	Atac2-RA:p.Ala233Pro				0.297723	0	0	0.297723	5.67e-06	5.66e-06	0.644233
missense	-1	2L	14308671	C	A	FBgn0261563	wb-RC:p.[Ala172Glu]; wb-RD:p.[Ala172Glu]; wb-RE:p.[Ala172Glu]; wb-RF:p.[Ala172Glu]				0	0.58889	0.608947	-0.598918	0.0169382	0.000151874	0.90355
missense	-1	2R	20875957	C	A	FBgn0035091	CG3829-RA:p.Arg74Ser				0.276073	0	0	0.276073	0.00258219	0.00257539	0.544069
missense	-1	3L	827970	C	T	FBgn0035162	CG13900-RB:p.[Ala659Thr]; CG13900-RA:p.[Ala1198Thr]				0.605557	0	0	0.605557	0.00151078	0.00151187	0.685964
missense	-1	3R	12976818	C	A	FBgn0038490	CG5285-RA:p.Pro127Gln				0.95238	0	0	0.95238	3.71e-05	3.71e-05	0.695641
missense	-1	3L	19792612	G	C	FBgn0036906	Ir76a-RE:p.Asp62His				1	0	0	1	9.86e-15	5.51e-15	0.942315
missense	-1	3L	19793916	T	A	FBgn0036906	CG14102-RA:p.Ser141Cys				0.209197	0	0	0.209197	0.0153203	0.0153206	0.991773
missense	-1	3L	19793351	G	T	FBgn0036906	CG14102-RA:p.Arg262Ser				0	0.861513	0.593203	-0.727358	0.000640219	0.00920775	0.156803
missense	-1	3L	19793844	C	G	FBgn0036906	CG14102-RA:p.Ala165Pro				0	0.907407	0.7534	-0.830403	0.000606033	0.00243239	0.34581
missense	-1	3R	9127883	G	C	FBgn0038136	CG8774-RA:p.[Arg920Thr]; CG8774-RB:p.[Arg863Thr]				0.53383	0	0.117405	0.475128	0.00257958	0.00770824	0.162928
missense	-1	3R	9126697	G	A	FBgn0038136	CG8774-RA:p.[Ala552Thr]; CG8774-RB:p.[Ala495Thr]				1	0	0.18439	0.907805	6.57e-14	0.000142099	0.117464
missense	-1	3L	12895466	T	G	FBgn0036324	CG12520-RB:p.Glu70Ala				1	0.442855	0.12	0.718573	0.0152694	1.78e-05	0.224679
missense	-1	2L	4577808	C	G	FBgn0053196	HP6-RA:p.Arg99Thr				0.368947	0.935713	0.846153	-0.521987	0.000239527	0.00625925	0.415117
missense	-1	2L	4521423	G	A	FBgn0053196	dp-RM:p.[Pro3915Ser]; dp-RJ:p.[Pro10974Ser]; dp-RI:p.[Pro10974Ser]; dp-RK:p.[Pro10974Ser]; dp-RL:p.[Pro10974Ser]; dp-RG:p.[Pro10325Ser]; dp-RE:p.[Pro6666Ser]; dp-RN:p.[Pro8429Ser]; dp-RD:p.[Pro10855Ser]; dp-RF:p.[Pro10768Ser]; dp-RC:p.[Pro10974Ser]				0.539287	0	0	0.539287	0.000113339	0.00011354	0.307715
missense	-1	2L	4495968	T	C	FBgn0053196	dp-RL:p.[Thr15843Ala]; dp-RH:p.[Thr16790Ala]; dp-RG:p.[Thr17433Ala]; dp-RE:p.[Thr13774Ala]; dp-RN:p.[Thr15537Ala]; dp-RD:p.[Thr17963Ala]; dp-RF:p.[Thr17876Ala]; dp-RC:p.[Thr18082Ala]				0.44466	0	0	0.44466	0.00056632	0.000569019	0.0523432
missense	-1	2L	4499958	A	G	FBgn0053196	dp-RL:p.[Ser14605Pro]; dp-RH:p.[Ser15552Pro]; dp-RG:p.[Ser16195Pro]; dp-RE:p.[Ser12536Pro]; dp-RN:p.[Ser14299Pro]; dp-RD:p.[Ser16725Pro]; dp-RF:p.[Ser16638Pro]; dp-RC:p.[Ser16844Pro]				0.598287	0	0	0.598287	1.79e-06	1.79e-06	0.128457
missense	-1	2L	4494362	T	G	FBgn0053196	dp-RL:p.[Glu16378Ala]; dp-RH:p.[Glu17325Ala]; dp-RG:p.[Glu17968Ala]; dp-RE:p.[Glu14309Ala]; dp-RN:p.[Glu16072Ala]; dp-RD:p.[Glu18498Ala]; dp-RF:p.[Glu18411Ala]; dp-RC:p.[Glu18617Ala]				0.466837	0	0	0.466837	0.0158638	0.0158751	0.730273
missense	-1	2L	4497604	C	A	FBgn0053196	dp-RL:p.[Arg15348Ser]; dp-RH:p.[Arg16295Ser]; dp-RG:p.[Arg16938Ser]; dp-RE:p.[Arg13279Ser]; dp-RN:p.[Arg15042Ser]; dp-RD:p.[Arg17468Ser]; dp-RF:p.[Arg17381Ser]; dp-RC:p.[Arg17587Ser]				0.616117	0	0	0.616117	0.000125476	0.000125649	0.454631
missense	-1	2L	4507465	G	A	FBgn0053196	dp-RK:p.[Pro14625Ser]; dp-RH:p.[Pro13333Ser]; dp-RG:p.[Pro13976Ser]; dp-RE:p.[Pro10317Ser]; dp-RN:p.[Pro12080Ser]; dp-RD:p.[Pro14506Ser]; dp-RF:p.[Pro14419Ser]; dp-RC:p.[Pro14625Ser]				0.501437	0	0	0.501437	0.0155768	0.0155823	0.847389
missense	-1	2L	4536072	T	C	FBgn0053196	dp-RJ:p.[Thr7450Ala]; dp-RI:p.[Thr7450Ala]; dp-RK:p.[Thr7450Ala]; dp-RL:p.[Thr7450Ala]; dp-RH:p.[Thr7450Ala]; dp-RG:p.[Thr7450Ala]; dp-RN:p.[Thr4905Ala]; dp-RD:p.[Thr7331Ala]; dp-RF:p.[Thr7450Ala]; dp-RC:p.[Thr7450Ala]				0.485313	0	0	0.485313	1.53e-05	1.53e-05	0.589244
missense	-1	2L	4558944	C	T	FBgn0053196	dp-RJ:p.[Ala1637Thr]; dp-RI:p.[Ala1637Thr]; dp-RK:p.[Ala1637Thr]; dp-RL:p.[Ala1637Thr]; dp-RH:p.[Ala1637Thr]; dp-RG:p.[Ala1637Thr]; dp-RE:p.[Ala1637Thr]; dp-RD:p.[Ala1518Thr]; dp-RF:p.[Ala1637Thr]; dp-RC:p.[Ala1637Thr]				0.479437	0.2	0.271777	0.243548	0.00534943	0.0329836	0.0762994
missense	-1	3L	16136525	G	A	FBgn0036576	CG32152-RA:p.Pro121Ser				0.383467	0.15263	0	0.307152	0.00912934	1.17e-05	0.153756
missense	-1	3L	16135772	C	T	FBgn0036576	CG32152-RA:p.Ala372Thr				0.269197	0	0	0.269197	0.00871427	0.00873995	0.379581
missense	-1	2L	7725323	G	T	FBgn0031937	CG13795-RB:p.Ala149Glu				0.88146	0	0	0.88146	0.000344414	0.000343692	0.0936308
missense	-1	3R	23762292	C	T	FBgn0039559	Mes-4-RA:p.Ala363Thr				1	0.11111	0.45963	0.71463	1.31e-05	0.0321803	0.0696398
missense	-1	X	19747288	G	A	FBgn0031078	CG11943-RB:p.[Ala218Thr]; CG11943-RA:p.[Ala195Thr]				1	0.16667	0	0.916665	7.01e-05	4.19e-14	0.373508
missense	-1	2R	10747871	T	C	FBgn0053505	U3-55K-RA:p.Asp75Gly				0.62429	0	0.09524	0.57667	9.48e-05	0.000309447	0.369389
missense	-1	3R	17710144	T	C	FBgn0038914	fit-RA:p.Thr4Ala				0.49439	0	0	0.49439	0.00457889	0.00457983	0.907667
missense	-1	2L	15770613	T	C	FBgn0041627	Ku80-RA:p.Thr114Ala				1	0	0.19457	0.902715	1.17e-14	0.000224925	0.132464
missense	-1	3R	9665314	G	A	FBgn0051495	CG31495-RA:p.Pro70Ser				0.641413	0	0	0.641413	0.00424793	0.00424293	0.48465
missense	-1	3R	9664881	T	A	FBgn0051495	CG31495-RA:p.Lys214Met				0.80844	0	0	0.80844	1.3e-05	1.3e-05	1
missense	-1	3R	26908167	G	C	FBgn0024288	Sox100B-RA:p.Asp301His				0.61038	0	0.11765	0.551555	0.0076948	0.0114788	0.373959
missense	-1	3R	26908107	G	A	FBgn0024288	Sox100B-RA:p.Ala281Thr				0.602817	0	0	0.602817	0.00428014	0.00428483	0.519329
missense	-1	2R	3600634	CT	GC	FBgn0033215	CG1942-RA:p.Leu84Ala				0.35573	0	0	0.35573	0.00571402	0.0057065	0.684234
missense	-1	2L	299415	A	C	FBgn0020622	Pi3K21B-RA:p.Glu128Ala				0.511647	0.11111	0	0.456092	0.0108149	0.00658599	0.377422
missense	-1	2L	13974703	A	G	FBgn0259896	nimC1-RA:p.Ser464Pro				0.35572	1	1	-0.64428	0.00424226	0.00423887	0.369827
missense	-1	3L	18981126	G	A	FBgn0036836	CG11619-RA:p.Pro45Ser				0.215027	0	0	0.215027	0.00215242	0.00216029	0.465987
missense	-1	3R	15609810	A	C	FBgn0038734	CG11453-RA:p.Gln139Pro				0.535067	0.18182	0.15143	0.368442	0.0212482	0.0253193	0.636762
missense	-1	2L	1713953	A	G	FBgn0086698	frtz-RA:p.Met295Thr				0.404633	0	0	0.404633	0.0487644	0.0487667	0.977132
missense	-1	3R	23410655	G	A	FBgn0040080	raps-RA:p.Ala530Thr				0.593073	0.11765	0.196597	0.43595	0.0014648	0.00695932	0.0697195
missense	-1	X	2148093	A	G	FBgn0029608	CG3091-RA:p.[Ser10Pro]; CG3091-RB:p.[Ser10Pro]				1	0	0.4	0.8	1.87e-14	0.0028811	0.372373
missense	-1	2R	19256010	G	C	FBgn0034853	CG13550-RA:p.Ala443Pro				1	0.398147	0.7	0.450927	0.00532394	0.0302838	0.556644
missense	-1	2L	6764962	C	A	FBgn0031857	CG11321-RB:p.Val1517Phe				0.66147	0	0.11111	0.605915	0.000142471	0.000461077	0.36961
missense	-1	2L	6764890	T	C	FBgn0031857	CG11321-RB:p.Thr1541Ala				0.642063	0.222223	0.36111	0.350397	0.00185808	0.0123624	0.487307
missense	-1	3R	20443081	G	A	FBgn0263490	mld-RF:p.[Ala654Thr]; mld-RA:p.[Ala654Thr]; mld-RC:p.[Ala654Thr]; mld-RE:p.[Ala654Thr]; mld-RD:p.[Ala654Thr]				0.39328	0	0.07692	0.35482	0.033885	0.0442006	0.368356
missense	-1	2R	7753466	T	A	FBgn0033659	Damm-RA:p.Lys93Met				0.228833	0	0	0.228833	0.0339432	0.0340255	0.567927
missense	-1	X	837915	G	A	FBgn0040348	CG3703-RA:p.Pro456Ser				1	0	0	1	3.8e-14	4.32e-14	0.969045
missense	-1	2L	13969902	T	C	FBgn0028542	nimB4-RA:p.Thr3Ala				0.84997	0	0	0.84997	0.00114021	0.00114037	0.88649
missense	-1	2L	13968919	T	C	FBgn0028542	nimB4-RA:p.Thr278Ala				1	0	0	1	4.88e-14	7.68e-14	0.552144
missense	-1	3R	25051104	C	T	FBgn0039654	Brd8-RA:p.Pro605Ser				1	0	0.2	0.9	4.21e-14	0.000149067	0.373775
missense	-1	3R	23857034	A	C	FBgn0085391	CG34362-RD:p.[Ser358Arg]; CG34362-RB:p.[Ser358Arg]				1	0.319087	0.325	0.677957	0.0110594	0.00255763	0.622153
missense	-1	2R	9072474	G	A	FBgn0053182	seq-RA:p.Pro59Ser				0.891523	0.41111	0.303845	0.534046	0.00524514	0.0039022	0.161479
missense	-1	2R	9068991	C	T	FBgn0053182	seq-RA:p.Ala706Thr				0.9	0	0.33333	0.733335	0.00084327	0.00619234	0.374624
missense	-1	3L	9081266	A	G	FBgn0023479	Tequila-RD:p.[Thr310Ala]; Tequila-RA:p.[Thr1646Ala]; Tequila-RB:p.[Thr234Ala]				0.72456	0.237765	0	0.605677	0.0416155	0.00892068	0.243732
missense	-1	3R	5416483	T	A	FBgn0037719	bocksbeutel-RB:p.[Ser57Cys]; bocksbeutel-RA:p.[Ser57Cys]				1	0.38283	0.4625	0.577335	0.0133571	9.45e-06	0.617341
missense	-1	2R	8204165	C	T	FBgn0050046	CG30046-RB:p.Pro668Ser				1	0	0	1	2.94e-14	3.48e-14	0.0533696
missense	-1	2L	3726894	G	A	FBgn0003386	Shaw-RC:p.[Ala579Thr]; Shaw-RB:p.[Ala564Thr]				0.67949	0	0	0.67949	7.6e-07	7.59e-07	0.655512
missense	-1	3L	11988294	G	A	FBgn0026432	Grip163-RA:p.Pro893Ser				0.725163	0.1875	0	0.631413	0.0010796	0.000109211	0.375534
missense	-1	3L	11991071	A	G	FBgn0026432	Grip163-RA:p.Met27Thr				0	0.90196	1	-0.95098	0.000771294	1.38e-14	0.375402
missense	-1	2L	1882942	T	C	FBgn0031373	CG15358-RA:p.Thr189Ala				0.587877	0.14286	0	0.516447	0.00760228	0.00382541	0.377455
missense	-1	2L	10195627	G	A	FBgn0028675	Sur-RB:p.Pro337Ser				0.838617	0	0	0.838617	1.2e-08	1.2e-08	0.846955
missense	-1	3R	27079628	C	T	FBgn0039836	CG1750-RB:p.[Gly214Asp]; CG1750-RA:p.[Gly261Asp]				0.588977	0.26667	0	0.455642	0.0132755	0.0016311	0.374904
missense	-1	X	2038688	G	A	FBgn0023507	CG3835-RA:p.[Gly466Asp]; CG3835-RB:p.[Gly466Asp]; CG3835-RC:p.[Gly466Asp]				1	0	0.6	0.7	3.71e-14	0.0161843	0.374406
missense	-1	2R	6525195	G	A	FBgn0033538	CG11883-RC:p.Ala53Thr				0.68559	0	0	0.68559	0.00456761	0.00457025	0.764564
missense	-1	4	775651	C	G	FBgn0005666	bt-RC:p.[Ser3458Cys]; bt-RF:p.[Ser3743Cys]; bt-RG:p.[Ser3398Cys]				0	0.484723	0.681687	-0.583205	0.0316829	0.00641981	0.378147
missense	-1	4	787266	T	A	FBgn0005666	bt-RC:p.[Cys7104Ser]; bt-RF:p.[Cys7389Ser]; bt-RG:p.[Cys7044Ser]				0	0.614067	0.690557	-0.652312	0.0117519	0.00280206	0.683349
missense	-1	2R	9034483	G	A	FBgn0263998	CG33007-RA:p.Pro435Ser				0.549747	0	0.22727	0.436112	0.000271671	0.0058481	0.375983
missense	-1	2R	9035374	G	T	FBgn0263998	CG33007-RA:p.His138Asn				0.210933	0	0	0.210933	0.029829	0.0297797	0.647742
missense	-1	2R	11101961	G	T	FBgn0033999	CG8093-RA:p.Pro358Gln				1	0	0	1	5.14e-14	2.92e-14	0.27254
missense	-1	2R	11101842	C	G	FBgn0033999	CG8093-RA:p.Ala398Pro				1	0	0	1	3.2e-17	3.55e-15	0.968563
missense	-1	2L	13278841	A	G	FBgn0032497	CG6108-RA:p.Asp489Gly				0.367203	0	0	0.367203	0.000144549	0.000144623	0.824363
missense	-1	2R	12209945	T	C	FBgn0034114	CG4282-RA:p.Ser4Pro				1	0.31551	0.19359	0.74545	0.00123134	0.00022067	0.160413
missense	-1	3R	10142796	A	G	FBgn0011474	pr-set7-RA:p.[Asp131Gly]; pr-set7-RB:p.[Asp131Gly]; pr-set7-RC:p.[Asp131Gly]				0	0.566033	0.433787	-0.49991	0.00267382	0.0160161	0.392409
missense	-1	2R	18547361	G	A	FBgn0034759	CG13511-RA:p.Ala49Thr				0.78384	0	0	0.78384	0.000199569	0.000199649	0.802932
missense	-1	2L	7773131	G	A	FBgn0031945	CG7191-RA:p.Ala117Thr				0.902777	0.11765	0	0.843952	0.00118611	0.000749864	0.374619
missense	-1	3L	19494321	G	T	FBgn0036877	CG9452-RA:p.Ala398Glu				0.31923	0	0	0.31923	0.00186433	0.0018673	0.653826
missense	-1	3R	17860543	AA	CC	FBgn0025140	BG4-RA:p.Lys87Pro				1	0.560477	0.69565	0.371937	0.0407134	0.0295175	0.297393
missense	-1	3L	7318877	C	T	FBgn0035762	CG8605-RA:p.Thr628Met				0.154287	0	0	0.154287	0.0296832	0.0297284	0.78153
missense	-1	3R	8477337	T	C	FBgn0038071	CG6234-RA:p.Ser290Pro				0.49866	0	0	0.49866	0.00452573	0.00451512	0.36188
missense	-1	3R	8477301	C	G	FBgn0038071	CG6234-RA:p.Pro278Ala				0.461387	0	0	0.461387	2.2e-05	2.2e-05	0.616272
missense	-1	3R	8477088	C	G	FBgn0038071	CG6234-RA:p.Pro207Ala				0.422207	0	0	0.422207	0.000298018	0.000298574	0.502587
missense	-1	3L	12815902	A	G	FBgn0260965	CG42588-RA:p.[Thr2242Ala]; CG42588-RB:p.[Thr2217Ala]				1	0.704333	0.81168	0.241993	0.0447709	0.0300985	0.411459
missense	-1	3L	12810478	T	A	FBgn0260965	CG42588-RA:p.[Met510Lys]; CG42588-RB:p.[Met510Lys]				0	0.467837	0.507843	-0.48784	0.00928685	0.0124932	0.80673
missense	-1	2R	14164203	A	G	FBgn0003022	Ote-RA:p.Ser128Pro				0	0.621	0.481977	-0.551488	0.000288117	0.00538004	0.244062
missense	-1	3L	15863300	T	C	FBgn0036542	pHCl-RD:p.[Thr200Ala]; pHCl-RI:p.[Thr200Ala]; pHCl-RH:p.[Thr200Ala]; pHCl-RE:p.[Thr200Ala]; pHCl-RF:p.[Thr200Ala]; pHCl-RG:p.[Thr200Ala]; pHCl-RC:p.[Thr200Ala]				0.527707	0.21739	0	0.419012	0.0314547	0.0116606	0.372733
missense	-1	3L	11192039	C	T	FBgn0036147	Plod-RA:p.[Gly571Asp]; Plod-RB:p.[Gly571Asp]				1	0	0.15385	0.923075	3.24e-14	5.04e-05	0.375649
missense	-1	3R	18347257	T	A	FBgn0038981	CG5346-RA:p.Ser153Cys				0.706587	0.1875	0	0.612837	0.00378104	0.00121285	0.373479
missense	-1	X	7619308	A	G	FBgn0022786	Hira-RA:p.Thr892Ala				1	0	0	1	1.73e-15	3.76e-16	0.318086
missense	-1	2R	10497672	G	A	FBgn0026427	Su(var)2-HP2-RB:p.[Thr739Met]; Su(var)2-HP2-RA:p.[Thr2363Met]				1	0	0	1	4.09e-14	3.52e-14	0.928481
missense	-1	2R	10495197	G	A	FBgn0026427	Su(var)2-HP2-RB:p.[Pro1543Ser]; Su(var)2-HP2-RA:p.[Pro3167Ser]				0	0.728533	1	-0.864267	0.00956232	4.11e-15	0.15754
missense	-1	2R	10499136	T	G	FBgn0026427	Su(var)2-HP2-RB:p.[Gln296Pro]; Su(var)2-HP2-RA:p.[Gln1920Pro]				1	0	0	1	2.69e-14	5.38e-14	0.606222
missense	-1	2R	10496998	C	T	FBgn0026427	Su(var)2-HP2-RB:p.[Ala964Thr]; Su(var)2-HP2-RA:p.[Ala2588Thr]				0.10526	0.830303	1	-0.809892	0.00340555	1.06e-05	0.239388
missense	-1	2R	10500717	G	T	FBgn0026427	Su(var)2-HP2-RA:p.His1423Asn				0.986667	0.54882	0.87912	0.272697	0.0420179	0.013454	0.0721417
missense	-1	3R	25547932	C	G	FBgn0039686	CG15506-RA:p.[Pro287Ala]; CG15506-RB:p.[Pro326Ala]				0.15	0	0	0.15	0.000100981	0.000100706	0.528788
missense	-1	3L	18798207	T	C	FBgn0036814	CG14073-RA:p.[Thr154Ala]; CG14073-RB:p.[Thr1436Ala]				0	0.59596	0.528323	-0.562142	0.00752709	4.91e-06	0.603391
missense	-1	3R	9939499	GC	AT	FBgn0038205	Kif19A-RB:p.Ala432Ile				1	0.42857	0.38095	0.59524	0.00860627	0.00453415	0.880228
missense	-1	2R	7190237	T	C	FBgn0033615	Obp47b-RA:p.Thr60Ala				0	1	1	-1	2.14e-14	9.63e-14	0.263208
missense	-1	2R	7189796	T	C	FBgn0033615	Obp47b-RA:p.Thr186Ala				1	0	0	1	7.97e-15	2.48e-15	0.458885
missense	-1	2R	16759276	G	A	FBgn0050295	Ipk1-RA:p.[Ala34Thr]; Ipk1-RB:p.[Ala34Thr]				1	0.36667	0	0.816665	0.00504952	3.8e-14	0.145326
missense	-1	3L	8712651	G	A	FBgn0011509	SrpRbeta-RA:p.Pro151Ser				0.329537	0	0	0.329537	7.16e-05	7.19e-05	0.167954
missense	-1	3R	25414841	G	T	FBgn0039671	CG11470-RA:p.Ala215Glu				1	0.82857	0.909127	0.131152	0.00685582	0.00965398	0.105374
missense	-1	3L	4198362	C	T	FBgn0263110	CG43367-RD:p.[Pro974Ser]; CG43367-RC:p.[Pro1016Ser]; CG43367-RE:p.[Pro816Ser]; CG43367-RF:p.[Pro816Ser]				0.431667	0	0.1425	0.360417	0.000647326	0.00695219	0.121436
missense	-1	2R	3528931	C	A	FBgn0263077	CG43340-RO:p.[Pro803Gln]; CG43340-RN:p.[Pro803Gln]; CG43340-RM:p.[Pro803Gln]				0.214547	0	0	0.214547	0.0256806	0.0257373	0.688929
missense	-1	2R	3530160	C	T	FBgn0263077	CG43340-RO:p.[Pro1213Ser]; CG43340-RN:p.[Pro1213Ser]; CG43340-RM:p.[Pro1213Ser]				0.76396	0.182707	0.148355	0.598429	0.00105511	0.000368967	0.339302
missense	-1	2R	3532824	C	A	FBgn0263077	CG43340-RO:p.[His2101Asn]; CG43340-RN:p.[His2101Asn]; CG43340-RM:p.[His2101Asn]				0.2103	0	0	0.2103	0.00532716	0.00532187	0.753209
[truncated: 235,167+ more rows]

## Sheet: Large variants
Type	Length	Chromosome_A	Position_A	Chromosome_B	Position_B	B3 Freq	O1 Freq	O3 Freq	B-O Freq	RefGene
Deletion	7273	3L	17724005	3L	17731278		1	1	-1	Ccn
Deletion	1055	3L	939830	3L	940885		1	1	-1	Glut1
Deletion	1912	2R	9793166	2R	9795078		1	1	-1	shot
Deletion	5144	2L	11563692	2L	11568836		1	1	-1
Deletion	7411	2L	20576273	2L	20583684		1	1	-1
Deletion	413	3L	6328164	3L	6328577		1	1	-1
Deletion	7451	2R	20615461	2R	20622912		1	0.979	-0.9895	CG33988
Deletion	3406	3L	20814433	3L	20817839		1	0.979	-0.9895	Pka-R1
Deletion	9092	3L	1154184	3L	1163276		1	0.978	-0.989	bab2
Deletion	4723	3L	6849078	3L	6853801		1	0.976	-0.988
Deletion	6523	2L	2772653	2L	2779176		1	0.97	-0.985
Deletion	9123	3R	21658468	3R	21667591		0.963	1	-0.9815	Mst57Da//alpha4GT2
Deletion	7443	2L	347940	2L	355383		1	0.953	-0.9765	Ent1
Deletion	1406	3R	13751632	3R	13753038		1	0.947	-0.9735
Deletion	10472	2R	5367636	2R	5378108		0.976	0.97	-0.973
Deletion	7440	3L	4328787	3L	4336227		1	0.906	-0.953	Cip4
Deletion	9109	2L	8452477	2L	8461586		0.963	0.923	-0.943	fu12
Inversion	14592403	2L	3136910	2L	17729313		0.859	0.778	-0.8185	CadN//toc
Deletion	577	4	301482	4	302059		0.636	0.93	-0.783	Syt7
Deletion	5519	3L	20205760	3L	20211279	0.204	0.957	0.972	-0.7605	CG7017//CG6933
Deletion	4236	2R	3322452	2R	3326688		0.569	0.74	-0.6545	so
Insertion	4159	2R	993147	2R	997306		0.544	0.694	-0.619
Deletion	1097	2R	637903	2R	639000		0.524	0.693	-0.6085	CG17082
Deletion	409	2R	1369137	2R	1369546		0.317	0.812	-0.5645	CG30440
Deletion	4754	3L	23752929	3L	23757683		0.468	0.547	-0.5075
Deletion	440	3L	19444245	3L	19444685		0.694	0.31	-0.502
Deletion	9791	3L	20320800	3L	20330591		0.316	0.282	-0.299
Deletion	540	X	8188442	X	8188982		0.075	0.069	-0.072	nAcRalpha-7E
Insertion	529	3R	11800733	3R	11801262	0.196			0.196	Hel89B
Deletion	3628	2R	1146121	2R	1149749	0.227			0.227	d4
Insertion	418	2L	22634923	2L	22635341	0.232			0.232	CG40006
Deletion	444972	2R	301414	2R	746386	0.38			0.38	Gprk1
Deletion	422	3R	21384511	3R	21384933	0.679		0.19	0.489	msi
Deletion	576	3R	22194203	3R	22194779	0.513			0.513
Deletion	444	2L	14524671	2L	14525115	0.573			0.573	CG33648
Deletion	868	2R	586869	2R	587737	0.588			0.588	Nipped-B
Deletion	5148	3R	15935314	3R	15940462	0.986	0.383		0.603	CG10887
Deletion	4744	2R	768749	2R	773493	0.968		0.348	0.62
Deletion	1164	2L	22404937	2L	22406101	0.621			0.621
Insertion	2204	2R	1189592	2R	1191796	0.625			0.625
Deletion	2396	2R	828517	2R	830913	0.927		0.284	0.643
Deletion	4331	2R	812436	2R	816767	1		0.353	0.647
Deletion	6449	3L	21365876	3L	21372325	0.943	0.254		0.689
Deletion	500	2L	22212183	2L	22212683	1	0.444	0.1	0.728	Ir40a
Deletion	432	2L	22923399	2L	22923831	0.732			0.732
Deletion	453	2L	22714309	2L	22714762	0.787		0.054	0.733
Inversion	496662	4	716946	4	1213608	0.803			0.803	myoglianin//CG33521//CG17471
Insertion	1348060	2R	413800	2R	1761860	0.806			0.806
Insertion	1453473	2R	597676	2R	2051149	0.811			0.811	Nipped-B//EcR
Deletion	412	2L	22683971	2L	22684383	0.842			0.842
Deletion	426729	3R	13324898	3R	13751627	0.88			0.88	Dscam3
Deletion	9107	3R	15982468	3R	15991575	0.906			0.906
Deletion	1995377	2R	3088832	2R	5084209	0.917			0.917	pk//unpg
Deletion	7538	3L	1506054	3L	1513592	0.932			0.932	Psa//cue
Deletion	15523	3R	4723998	3R	4739521	0.941			0.941	pyd
Deletion	4259	2R	7185181	2R	7189440	0.949			0.949	CG42336//CG7741//Obp47b
Deletion	6131	3R	1572793	3R	1578924	0.969			0.969	CG2091
Deletion	5518	3R	8968809	3R	8974327	0.974			0.974	timeout//2mit
Deletion	7414	2L	21347605	2L	21355019	0.976			0.976	Tsp39D
Inversion	3204917	3R	24079114	3R	27284030	0.979			0.979	lox
Deletion	428	3L	789968	3L	790396	0.982			0.982
Deletion	2578	3R	18276322	3R	18278900	1			1	CG34376
Deletion	1107	3R	3675421	3R	3676528	1			1	CG34384
Deletion	1420	4	434632	4	436052	1			1
Deletion	419	2R	14400995	2R	14401414	1			1
Deletion	427	3R	8690338	3R	8690765	1			1
Inter_Chromosome	na	3L	18092276	X	11465614					CG11699//Kmn1//CG13698
Inter_Chromosome	na	3R	10455698	X	13295769					CG12725//CG7886
Inter_Chromosome	na	2L	22327348	3R	4312410					CG17018
Inter_Chromosome	na	2L	21336364	2R	1369354					CG30440
Inter_Chromosome	na	2L	22130397	2R	1041632					CycK//Atf6
Inter_Chromosome	na	2L	19762851	2R	20124797					fbp
Inter_Chromosome	na	2L	21705695	4	862894					fd102C//CG31619
Inter_Chromosome	na	3L	20001203	X	2952224					kirre
Inter_Chromosome	na	3R	19831909	X	11078328					KrT95D
Inter_Chromosome	na	2L	19620900	2R	8134624					Lar
Inter_Chromosome	na	2L	12728958	2R	446657					MRP//Stlk
Inter_Chromosome	na	2R	584675	3L	24370363					Nipped-B//nvd
Inter_Chromosome	na	3L	8016964	3R	23403624					nmo//wdb
Inter_Chromosome	na	2R	446615	3L	3051837					Stlk//CG32485
Inter_Chromosome	na	2L	21562892	2R	1195515					sxc
Inter_Chromosome	na	2L	22264570	3L	23473056
Inter_Chromosome	na	2R	1243395	X	22293647
