# Supplementary material for: Circadian gene variants and the skeletal muscle circadian clock contribute to the evolutionary divergence in longevity across Drosophila populations
Source: HighWire-hosted journal article supplement (doi:10.1101/gr.246884.118), 2019-06-27
Supplement: Supplemental_Table_S2.xlsx [file Supplemental_Table_S2.xlsx]

## Sheet: Legend
Supplemental Table S2
Transcriptome data from RNA sequencing of B3, O1 and O3 fly thoraces collected at 1 week (young) and 6 weeks (old) of age.
Data shown is the log2(FPKM).

## Sheet: Hunt_TableS2-RNASEQ 1vs6wks_wit
gene	FBgn ID	p-value(B3W1 vs. O1W1)	qvalue(p-value(B3W1 vs. O1W1))	-log10 pvalue(B3W1 vs. O1W1)	Ratio(O1W1 vs. B3W1)	p-value(B3W1 vs. O3W1)	qvalue(p-value(B3W1 vs. O3W1))	-log10 pvalue(B3W1 vs. O3W1)	Ratio(O3W1 vs. B1W1)	1WKB3-1	1WKB3-2	1WKB3-3	6WKB3-1	6WKB3-2	6WKB3-3	1WKO1-1	1WKO1-2	1WKO1-3	6WKO1-1	6WKO1-2	6WKO1-3	1WKO3-1	1WKO3-2	1WKO3-3	6WKO3-1	6WKO3-2	6WKO3-3
CG9192	FBgn0035193	1.09e-12	2.58486e-09	11.9626	3.65066	1.09e-11	6.25971e-09	10.9626	3.005	1.81566	1.92971	1.97672	2.19171	2.25963	1.89684	5.45165	5.62896	5.59347	4.01608	3.71756	4.19931	4.9683	4.83296	4.93582	3.54218	3.43582	3.67723
CG15263	FBgn0028853	8.82e-05	0.00069604	4.05453	3.59985	0.00124263	0.00211257	2.90566	2.61528	1.51941	3.22938	3.36328	2.51013	0.596938	0.471593	6.36382	6.83561	5.71218	6.37208	6.38626	6.3929	5.11885	5.22912	5.60995	5.56638	6.98662	7.13649
CheB38a	FBgn0067312	1.68e-09	4.85445e-07	8.77469	3.07861	7.51e-06	5.39829e-05	5.12436	1.42586	1.05636	1.48908	1.2291	1.21938	0.853597	0.788625	4.35263	4.29788	4.35988	4.75332	4.77352	4.51721	2.48468	2.37041	3.19704	3.48563	3.61449	3.5667
CG10725	FBgn0036362	0.000767022	0.00342872	3.11519	3.01872	0.638913	0.199542	0.194558	0.325157	0.555093	0.987883	1.1125	2.21945	0.968256	0.927082	5.506	3.15123	3.05441	3.73192	4.19388	3.70164	0.48556	1.03137	2.11402	1.5416	2.98979	3.15985
CG14893	FBgn0038451	9.59e-07	3.13683e-05	6.01818	2.88507	1.88e-05	0.00010224	4.72584	2.15381	0.361101	0.540678	0.582175	0.422089	0.423332	0.383752	2.82472	3.66375	3.65067	0.927868	0.987331	1.95351	2.47073	2.22153	3.25311	2.36029	2.71349	2.62687
Hsp26	FBgn0001225	3e-05	0.000319743	4.52288	2.64563	7.15e-06	5.29996e-05	5.14569	3.0628	1.89662	2.86579	2.3623	3.63853	4.04847	3.62569	4.65032	5.56212	4.84914	6.3061	5.43509	4.93652	6.07618	5.38784	4.8491	4.73475	5.15677	4.48214
Akh	FBgn0004552	0.00919627	0.021204	2.03639	2.63922	0.287316	0.105608	0.54164	0.948071	2.94588	2.15578	0.574215	2.6072	3.29817	3.91676	6.8948	3.02879	3.66995	4.40045	4.15959	3.57156	2.60338	2.6688	3.24792	4.42866	4.61072	4.81242
LysP	FBgn0004429	2.27e-09	5.50171e-07	8.64397	2.47049	2.28e-09	2.18229e-07	8.64207	2.46973	7.42254	7.09672	7.0476	6.81419	6.36283	6.54546	9.80843	9.44178	9.72811	10.0699	9.73011	9.95818	9.84507	9.62702	9.50396	10.2623	9.91319	10.1594
CG34040	FBgn0054040	0.00106848	0.00438757	2.97123	2.31243	0.00416388	0.00487018	2.3805	1.90586	5.40669	3.90191	4.4619	3.95527	3.8887	3.92376	5.96024	7.62425	7.12331	7.60985	7.56163	8.50584	6.03971	6.3553	7.09307	6.69515	8.03691	8.30429
to	FBgn0039298	4.34e-05	0.000415838	4.36251	2.30735	0.00242618	0.00333696	2.61508	1.41438	5.28014	5.32905	5.2825	6.32311	5.10675	5.31716	8.10487	7.14725	7.56163	7.63706	7.27034	8.03109	6.16389	6.8865	7.08444	5.81768	6.68304	6.43275
CG12027	FBgn0035585	0.00148689	0.00556599	2.82772	2.28807	0.0126279	0.0107183	1.89867	1.63675	0.106827	0.244394	0.344295	0.104167	0.412365	0.309136	2.14331	2.83743	2.57898	2.28307	1.92385	1.65144	2.27975	3.2079	0.118126	0.0963157	0.241417	0.466204
Lectin-galC1	FBgn0016675	3.79e-05	0.000379228	4.42136	2.12042	0.171168	0.0694695	0.766577	0.487814	4.14564	4.2029	4.87587	4.19196	3.62197	3.89508	7.28698	6.10699	6.19172	5.97256	5.91486	5.65309	5.32245	4.32315	5.04225	4.8869	5.19878	5.2363
CG14075	FBgn0036835	0.0390496	0.0609032	1.40838	2.11086	0.304804	0.110886	0.515979	0.977055	2.54078	1.88752	0.328579	2.76036	3.35558	3.64979	6.33253	1.84552	2.91141	4.12595	3.7547	2.86783	2.565	2.38745	2.73559	4.031	4.26319	4.40354
CG9458	FBgn0037765	0.000111608	0.000829688	3.9523	2.10033	0.119666	0.0525073	0.922029	0.625631	3.74633	3.80356	3.93626	4.07515	3.6106	3.26857	6.90057	5.37833	5.50826	5.44903	5.33629	4.90771	4.92262	4.12453	4.3159	4.05458	4.47605	4.72258
Try29F	FBgn0015316	0.0204703	0.0381032	1.68888	2.0563	0.0961373	0.0443599	1.01711	1.39128	1.98618	1.10872	1.65845	0.901544	0.985978	1.06194	1.37654	5.23939	4.30631	3.0226	3.11461	3.74633	3.72243	2.565	2.63976	2.21984	3.06062	1.64928
CycB	FBgn0000405	2.62e-08	3.18623e-06	7.5817	2.04015	0.000249369	0.000676277	3.60316	0.825688	0.330465	0.591673	0.627491	0.523246	0.387167	0.778662	2.70338	2.76901	2.19769	1.11929	0.902887	1.13532	1.42628	1.50767	1.09274	0.563553	0.649296	0.695532
dro4	FBgn0052282	1.02e-09	4.03143e-07	8.9914	1.93692	1.04e-09	1.31087e-07	8.98297	1.93397	7.62425	7.78761	7.48755	6.35023	6.365	6.24523	9.56737	9.48388	9.65893	9.15657	9.22062	9.01122	9.72811	9.48388	9.48934	9.2719	8.96367	8.81933
CG3253	FBgn0041706	1.09e-05	0.00015858	4.96257	1.9289	0.958872	0.272095	0.0182394	0.0141098	0.899636	0.70651	1.19887	1.04122	0.852482	1.11882	3.35484	2.1454	3.09146	3.47063	3.36191	3.64578	0.799457	0.672115	1.37577	1.26918	1.23686	1.24578
snoRNA:U3:54Ab	FBgn0065047	2.54e-06	5.93441e-05	5.59517	1.90249	0.00536966	0.00580949	2.27005	-0.775967	1.69337	1.11657	1.6941	5.03114	4.52233	4.80154	3.13801	3.83118	3.24231	2.49434	2.40663	2.95762	0.612918	0.709582	0.85364	2.02686	1.94832	1.59232
CG16704	FBgn0031558	6.71e-07	2.48629e-05	6.17328	1.85099	2.98e-06	2.96085e-05	5.52578	1.60611	5.46229	5.14632	5.12707	5.34295	5.33435	5.43861	7.42826	6.72391	7.13649	7.21417	7.41951	7.52395	6.76309	6.74965	7.04128	7.71364	7.42006	8.13901
Drs	FBgn0010381	7.8e-06	0.000123727	5.10791	1.84809	0.00286252	0.00373955	2.54325	0.92656	7.82605	7.26551	7.27644	11.071	11.3713	11.2023	9.48388	9.42008	9.00829	8.0575	8.89648	8.20123	8.59836	8.52299	8.02632	8.13401	7.65628	8.04704
CheA86a	FBgn0261291	7.39e-07	2.61565e-05	6.13136	1.81164	2.19e-06	2.37299e-05	5.65956	1.63389	2.29653	2.51952	1.99012	2.0389	2.10786	1.72862	4.13537	4.02534	4.08037	4.48526	4.72108	4.64468	3.95712	3.42758	4.32315	4.39515	4.47015	4.31056
Cpr49Ab	FBgn0050042	0.0172297	0.0335873	1.76372	1.80403	0.613756	0.193734	0.212004	-0.338508	1.0165	2.40773	2.94001	1.56396	1.35932	1.81298	5.11651	3.46567	3.19416	2.35377	2.85825	1.89795	2.73495	0.421648	2.19212	1.68765	2.00097	1.77402
CG18302	FBgn0032266	1.06e-05	0.000156618	4.97469	1.74654	1.51e-05	8.70654e-05	4.82102	1.68589	3.16976	2.63387	2.6072	1.85342	1.45106	1.66791	4.81782	4.2184	4.61423	3.87413	3.95386	4.10237	4.35567	4.26579	4.84703	4.75017	4.08194	4.87498
CG3906	FBgn0034871	0.0215256	0.0395862	1.66704	1.66696	0.691558	0.212591	0.160171	0.256533	7.03975	7.76188	7.50914	7.08607	4.85108	5.20826	10.431	8.34982	8.53086	9.03324	9.31537	8.69392	7.22576	7.83849	8.01612	7.8164	8.90613	8.94737
CG18609	FBgn0034382	9.62e-05	0.000742662	4.01682	1.66232	0.0173976	0.0134834	1.75951	0.801181	3.95128	4.21471	4.00249	4.61096	3.57684	3.71509	6.18595	5.56007	5.4094	5.35733	5.37231	5.00874	5.27387	4.444	4.85415	4.62111	4.88933	5.0216
CG34324	FBgn0085353	0.00496868	0.0135047	2.30376	1.66084	0.170639	0.0693038	0.767922	0.705368	8.44002	9.56737	8.96848	9.83315	8.64895	9.11696	11.677	10.0751	10.2063	11.0317	11.1459	10.7378	9.09705	9.8538	10.1411	9.95818	11.0317	10.7378
CG43673	FBgn0263748	0.011981	0.0255619	1.92151	1.66054	0.716697	0.218674	0.144664	0.208635	4.39515	5.86248	4.99253	3.88215	3.39391	3.58325	8.29827	5.841	6.09249	5.9343	6.46693	5.72028	4.84329	5.49797	5.53479	5.16252	5.79638	5.60336
CR32745	FBgn0052745	3.12e-05	0.000327707	4.50585	1.64137	0.00616422	0.00640381	2.21012	-0.842644	0.616589	1.45016	1.93046	1.6466	1.84887	1.8368	3.11266	2.8979	2.91077	2.8428	2.50752	2.25163	0.423573	0.41085	0.634858	0.682811	0.822518	0.854865
CG33511	FBgn0053511	0.00119705	0.00471975	2.92189	1.63824	0.482254	0.160273	0.316724	0.281772	1.36986	2.17589	2.00483	1.09694	1.14337	1.9406	3.99842	3.14626	3.32062	3.5999	4.00195	3.53971	2.4758	1.29945	2.62064	2.88375	3.6869	3.35055
CG15109	FBgn0034416	0.146264	0.150089	0.834863	1.63256	0.0172635	0.0134266	1.76287	2.90094	0.0418309	0.627491	0.516953	0.194413	0.207325	0.413981	0.243795	2.96698	2.87319	2.63489	1.46688	0.219173	4.26431	5.08862	0.53616	1.43322	1.07411	1.68421
CG31104	FBgn0051104	0.000448535	0.0023275	3.3482	1.61544	0.0452815	0.0264974	1.34408	0.755003	4.59021	5.20961	4.97427	3.20054	2.07406	2.73184	6.92576	6.5945	6.10015	6.06067	6.3884	6.13998	5.2851	5.83949	5.91451	5.37272	6.32138	6.28837
CG4757	FBgn0027584	6.78e-05	0.000582156	4.16877	1.61303	0.00105205	0.00186026	2.97796	-1.16402	5.43958	5.21538	4.85894	7.39439	7.46883	6.93803	7.28805	6.95838	6.10653	7.02338	6.92333	6.8284	4.18972	3.84733	3.98479	5.05516	4.6738	4.48786
CG12853	FBgn0040747	0.18481	0.17506	0.733275	1.59894	0.105014	0.0474102	0.978753	1.99266	3.17439	1.50495	1.05288	1.00742	0.799849	0.936672	1.6897	4.38515	4.45418	3.29265	3.47372	2.06395	4.68317	6.10045	0.92659	0.84035	0.886405	1.51475
LysE	FBgn0004428	0.0202595	0.0378104	1.69337	1.59385	0.0114048	0.00995987	1.94291	1.77849	2.24552	4.38145	3.11558	0.771771	0.438684	1.46712	5.84998	4.23012	4.444	3.80581	4.3502	3.25773	4.74536	5.84186	4.49081	4.28102	4.49849	3.6788
Mst77F	FBgn0086915	0.255415	0.211635	0.592754	1.59319	0.111571	0.0497466	0.952449	2.29096	3.01083	2.53695	1.70753	0.612468	0.970027	1.31983	1.57752	5.17487	5.2825	4.53622	3.8887	1.99404	5.6465	7.16202	1.31968	1.09631	1.19058	1.59618
CG7768	FBgn0036415	0.103012	0.119019	0.987112	1.5865	0.122891	0.053677	0.91048	1.4919	2.18403	2.58701	1.96548	2.64957	2.50011	2.90404	2.91323	4.28041	4.30239	3.68812	2.9282	1.98577	4.44542	5.65187	1.11494	1.51054	2.04833	2.50948
CG14864	FBgn0038311	2.56e-09	5.66987e-07	8.59176	1.58402	2.45e-05	0.00012299	4.61083	0.674471	0.648675	0.495648	0.625842	0.725117	0.842598	0.709483	2.176	2.19106	2.15516	1.86993	1.65245	1.79861	1.058	1.46085	1.27473	1.11494	1.43906	1.34727
tim	FBgn0014396	1.69e-06	4.40593e-05	5.77211	1.5755	8.68e-05	0.000305024	4.06148	1.05427	5.56945	5.16883	4.84494	5.95483	5.57121	5.38887	6.82486	6.80495	6.67991	7.06144	6.87673	6.88889	6.31388	5.97365	6.4585	6.70865	6.84293	6.81419
CG7045	FBgn0038978	0.208696	0.187594	0.680486	1.56766	0.0708838	0.0356022	1.14945	2.33838	0.620963	1.30684	0.967479	0.424798	0.449564	0.821022	0.211217	3.54641	3.84065	2.96245	2.335	0.530048	4.26119	5.26623	0.383011	0.469682	0.612918	0.930909
CG18662	FBgn0040963	0.25342	0.21046	0.596159	1.56332	0.0973532	0.0448488	1.01165	2.3431	2.1115	1.3717	0.619937	0.317305	0.342589	0.902287	0.381276	4.1421	4.26971	3.61539	2.86432	1.16948	4.54846	6.03971	0.544279	0.479136	0.983302	1.02189
Mal-B1	FBgn0032381	4.16e-06	8.27519e-05	5.38091	1.56193	1.07e-06	1.54393e-05	5.97062	1.77978	5.59624	5.97256	6.05433	6.53787	6.86821	6.92845	7.08607	7.35152	7.87134	8.19921	8.04964	8.43933	7.83568	7.56516	7.56163	8.5408	8.26067	8.50207
CG15219	FBgn0040519	0.353221	0.251631	0.451953	1.54872	0.181664	0.0726815	0.740731	2.27375	3.65043	2.06446	1.42697	0.365832	0.609355	0.597945	0.551445	5.59082	5.64576	4.98993	4.48768	2.54311	5.81422	7.2953	0.853597	0.753324	1.29367	1.64835
CG43799	FBgn0264343	5.38e-06	9.48571e-05	5.26922	1.54389	0.159177	0.0655733	0.79812	0.300069	0.441316	0.617981	0.647511	0.417936	0.443281	0.533257	2.53389	1.8765	1.92809	2.2764	2.81848	2.36136	0.790617	0.604977	1.21142	2.17229	1.85163	1.92305
CG15434	FBgn0040705	6.35e-08	5.90532e-06	7.19723	1.54323	4.18e-08	1.57929e-06	7.37882	1.60208	6.83663	7.06144	6.96783	1.72259	1.91137	1.60742	8.19297	8.76182	8.5408	6.5349	6.75124	6.39389	8.58854	8.57475	8.50884	7.73537	7.82161	7.70723
CG11854	FBgn0039299	0.00337354	0.0101847	2.47191	1.52552	0.15981	0.06577	0.796396	0.627668	0.625781	0.553547	0.52082	1.37832	1.04148	1.23362	3.15923	1.52026	1.59723	2.56897	2.77971	2.99319	0.502365	1.1125	1.96829	1.34913	1.92581	1.89203
CG31948	FBgn0051948	0.290223	0.226717	0.537268	1.51693	0.123709	0.0539437	0.907599	2.26976	1.76785	1.34356	0.681452	0.0474808	0.108493	0.419263	0.16967	3.89244	4.28153	3.77113	3.08746	1.2247	4.57058	5.97979	0.0517794	0.360956	0.822166	0.950704
CG11878	FBgn0039310	0.000201786	0.00127776	3.69511	1.51417	0.0982347	0.0451607	1.00774	0.516285	5.54931	5.73819	5.78863	5.13244	5.05476	4.77174	6.9422	7.50914	7.16728	7.53758	7.40065	7.69042	5.83576	5.89174	6.89749	6.38477	7.26551	7.17599
Mst84Dd	FBgn0004175	0.33536	0.24523	0.474489	1.49803	0.172623	0.0699611	0.762901	2.16462	3.2495	1.28992	1.04345	0.417936	0.18774	0.533257	0.50765	4.71591	4.8534	4.28764	3.8139	1.85754	5.08351	6.63217	0.36103	0.733932	0.661407	1.30755
tRNA:CR30229	FBgn0050229	0.00621508	0.015949	2.20655	1.49777	0.0737534	0.0366714	1.13222	-0.886258	1.74763	1.42091	1.7506	2.54784	3.34817	2.59286	2.85697	2.58517	3.97032	3.41323	2.36435	4.06148	0.321854	0.678227	1.26028	1.79479	1.50181	2.15578
Dpy-30L2	FBgn0035491	0.206402	0.186286	0.685286	1.4968	0.0647285	0.0335877	1.1889	2.27862	1.5067	1.1022	0.450611	0.408467	0.857124	0.606964	0.520848	3.53336	3.49571	3.13982	2.16482	1.12432	4.07925	5.44219	0.373938	0.31184	0.834327	0.786231
Mst84Db	FBgn0004173	0.38492	0.263971	0.41463	1.49672	0.271534	0.100761	0.566176	1.91297	3.78488	2.41278	1.38846	0.327143	0.19306	0.927199	0.609911	5.69867	5.76771	5.20287	4.3847	2.86751	5.79939	7.16155	0.364079	0.554872	0.872727	1.20514
CG4783	FBgn0038756	0.00757372	0.0184494	2.12069	1.49516	0.730442	0.221878	0.136414	0.164573	6.1454	6.20462	6.23157	7.21648	5.92473	6.30014	8.71744	7.05955	7.29009	7.34534	8.04704	7.7902	5.87198	6.35849	6.84485	6.63217	7.60985	7.69042
CG4375	FBgn0031295	0.242991	0.205212	0.61441	1.49229	0.0858651	0.0407732	1.06618	2.27414	1.99262	0.886338	0.360916	0.186951	0.288182	0.255529	0.327301	3.55306	3.83638	3.43983	2.67492	1.24607	4.10602	5.6465	0.309771	0.308102	0.495447	0.475132
CG31820	FBgn0051820	0.38102	0.262561	0.419052	1.48825	0.218737	0.0844772	0.660078	2.12383	3.77888	2.24916	1.02946	0.169563	0.436707	0.44149	0.72013	5.30507	5.49705	4.80469	4.31288	2.29984	5.69699	7.28503	0.446973	0.47198	0.701579	1.51099
CG17470	FBgn0032869	0.236991	0.20226	0.625268	1.47657	0.0755037	0.0372963	1.12203	2.30798	2.16654	0.990013	0.894254	0.0697016	0.248697	0.57435	0.485097	3.9777	4.01773	3.56692	2.75448	1.25376	4.33537	5.79498	0.844406	0.454404	1.11291	1.0715
Obp57b	FBgn0043534	3.45e-05	0.000353409	4.46218	1.47464	0.40092	0.13811	0.396942	-0.200951	1.30465	1.04202	1.20018	1.46666	1.33742	1.27394	3.02702	2.63928	2.30447	2.49257	2.58701	2.12807	0.853199	0.609355	1.48144	1.11559	1.58932	1.46259
ppk28	FBgn0030795	0.000167232	0.00111216	3.77668	1.47311	0.861906	0.251489	0.0645401	0.0487258	0.543357	0.493426	0.833193	1.36917	1.058	1.20034	2.80016	1.73689	1.75226	1.52024	1.54499	2.17888	0.511887	0.466975	1.03729	1.29288	1.1264	1.2372
CG17928	FBgn0032603	1.74e-08	2.31873e-06	7.75945	1.46936	6.48e-08	2.24179e-06	7.18842	1.30641	5.23361	5.12183	5.35661	4.83172	4.47171	4.84054	6.69515	6.7471	6.67787	6.52053	6.49888	6.27539	6.57159	6.38907	6.67063	6.73611	6.52791	6.53107
Cyt-c-d	FBgn0086907	0.0984054	0.115155	1.00698	1.46369	0.0259849	0.0179462	1.58528	2.07415	0.701828	0.559862	0.456282	0.412541	0.184351	0.816931	0.602378	2.78681	2.71986	1.77933	1.55385	0.738752	2.94488	4.48156	0.513977	0.288115	0.279852	0.643762
Porin2	FBgn0069354	0.0738418	0.0944247	1.1317	1.459	0.0573295	0.0310073	1.24162	1.56609	2.99025	2.29916	2.08351	0.613279	0.744736	1.07235	2.9028	4.44426	4.40287	3.39431	2.78981	1.50813	4.28321	5.60808	2.17989	0.760275	0.930176	1.0916
CG2955	FBgn0031585	0.21117	0.188811	0.675368	1.4533	0.0406937	0.0246517	1.39047	2.52307	0.351975	1.23071	0.531662	0.291954	0.0689815	0.409485	0.340547	2.97904	3.15465	2.74212	2.31793	0.479969	3.98751	5.33515	0.360916	0.267415	0.320371	0.838095
CG5017	FBgn0039553	0.221274	0.194338	0.65507	1.4513	0.0559596	0.0304614	1.25213	2.37982	0.52173	1.20539	0.478834	0.124947	0.339135	0.442488	0.0806981	3.13012	3.34904	2.47267	1.96502	0.327301	3.93261	5.17221	0.240585	0.240144	0.44976	0.490179
smp-30	FBgn0038257	2.19e-05	0.000256466	4.65956	1.44901	0.000125198	0.000402122	3.9024	1.20075	5.96738	6.24466	6.38379	4.87608	5.08071	5.23939	7.44259	7.52579	7.97447	7.78311	7.53292	7.57177	7.23836	7.29194	7.66777	7.65968	8.16183	8.52299
Cyp4aa1	FBgn0034053	0.00443949	0.0123495	2.35267	1.44325	0.445351	0.150586	0.351298	-0.326061	1.07907	1.46131	1.52669	1.71045	1.46131	1.50842	3.96878	2.2703	2.15774	2.34576	2.51369	2.31197	1.03729	0.551708	1.4999	1.46712	2.24488	2.21646
CG4836	FBgn0038762	0.338292	0.2465	0.470708	1.44105	0.143006	0.0604048	0.844646	2.26472	3.83118	2.40718	1.64577	0.854376	0.85364	1.38569	1.45033	5.28454	5.47241	5.05641	4.31367	2.57098	5.98378	7.45402	1.24048	0.92913	1.37935	1.67334
tobi	FBgn0261575	0.00102311	0.00427154	2.99008	1.43892	0.0098887	0.00900523	2.00486	1.02301	8.00566	8.62287	8.10692	7.98695	7.47854	7.73537	9.69356	9.78602	9.57263	10.1411	10.1594	10.5573	8.77733	9.34347	9.68369	9.57263	10.8729	10.8527
CG43680	FBgn0263763	0.0034895	0.010422	2.45724	1.43298	4.66e-05	0.000193645	4.33161	2.44741	3.85695	5.30924	4.39515	4.41412	3.18281	4.30251	6.4068	5.76727	5.68621	6.33631	6.82723	5.92052	7.02338	7.12829	6.7519	7.16369	7.27644	7.14725
janB	FBgn0001281	0.187708	0.176501	0.726517	1.42995	0.0614803	0.0324635	1.21126	2.1113	1.31695	0.373348	0.609355	0.410773	0.437663	0.333095	0.199531	3.17997	3.21	2.61612	2.13521	1.04148	3.49571	4.85108	0.286768	0.226077	0.582175	0.628526
CG9920	FBgn0038200	0.201664	0.183628	0.695372	1.42458	0.0733772	0.036516	1.13444	2.06907	3.34043	2.94294	2.50622	2.75024	2.45642	2.61586	2.56779	5.07308	5.42247	4.72813	4.04241	2.46382	5.63327	7.0676	2.29593	1.87823	2.27408	2.22556
CG43278	FBgn0262967	0.14118	0.146476	0.850227	1.4245	0.0395007	0.0241532	1.4034	2.08861	0.262998	0.609355	0.376918	0.359182	0.132321	0.573021	0.219148	2.62687	2.67674	1.71228	0.8921	0.327143	2.90216	4.4619	0.15103	0.239854	0.342941	0.696976
Cyp6a17	FBgn0015714	1.18e-08	1.86552e-06	7.92812	1.41932	3.88e-07	8.01521e-06	6.41117	1.03575	4.90868	4.97409	4.8491	4.36773	4.23079	4.63111	6.21196	6.35372	6.42415	6.1893	6.27755	6.18595	5.98984	5.73337	6.11591	5.98179	5.99583	5.96024
Cyp6a20	FBgn0033980	5.73e-10	2.95006e-07	9.24185	1.41569	2.07e-09	2.18229e-07	8.68403	1.26656	4.15616	4.17313	4.4005	4.30389	4.30745	4.45486	5.61454	5.69699	5.66532	5.38131	5.44781	5.36732	5.55863	5.32762	5.64321	5.29012	5.3313	5.26271
tRNA:G3:22BCa	FBgn0011859	0.00262908	0.00843757	2.5802	1.41145	0.00287311	0.00374847	2.54165	1.39327	2.52991	3.23702	1.61117	2.58672	2.88025	2.28358	3.92289	3.67723	4.01233	3.69903	3.26545	2.6098	3.77113	3.64196	4.1448	3.03302	3.12143	2.52662
CG14658	FBgn0037283	0.164732	0.162602	0.783222	1.40755	0.0661088	0.0339684	1.17974	1.923	0.598613	0.729991	0.530048	0.11095	0.118116	0.322826	0.407838	2.72327	2.9502	2.41604	1.66007	0.300548	2.96226	4.53676	0.128632	0.447082	0.503563	0.484909
CG30093	FBgn0050093	0.0576809	0.079689	1.23897	1.40732	0.0387963	0.0238578	1.41121	1.55546	1.07587	0.718362	0.280834	0.133327	0.489572	0.285301	1.46173	2.55074	2.28455	1.96802	1.63636	0.753202	2.44352	3.90285	0.395081	0.541114	0.722925	0.349154
CG15408	FBgn0031523	1.28e-07	9.63628e-06	6.89279	1.40604	1.04e-05	6.72587e-05	4.98297	0.925828	2.61116	2.65728	2.68689	1.7607	1.63061	1.98523	4.10786	4.0741	3.99148	4.30952	4.47338	4.60414	3.75766	3.47227	3.50289	3.6843	4.1312	4.11208
loopin-1	FBgn0259795	0.389259	0.265602	0.409761	1.40516	0.146543	0.0615817	0.834035	2.44183	2.72753	2.03921	0.861761	0.205371	0.503302	1.03349	0.228953	4.66757	4.94746	4.58674	3.64238	1.75408	5.57332	6.96783	0.412856	0.520921	0.857416	1.38867
Cyp6a2	FBgn0000473	2.18e-07	1.33165e-05	6.66154	1.40264	4.89e-07	9.36086e-06	6.31069	1.30167	5.12183	4.87573	5.02354	5.28228	5.08981	5.22362	6.10232	6.71723	6.40948	6.18841	6.05499	5.88314	6.28861	6.21642	6.4211	6.38691	6.21642	6.26423
tomboy20	FBgn0037828	0.215638	0.191345	0.666275	1.40263	0.0762041	0.037539	1.11802	2.08194	1.57329	0.985029	0.102611	0.108493	0.253134	0.318913	0.401783	2.99957	3.46747	2.76432	1.85163	0.765139	3.55057	5.07974	0.276453	0.214561	0.538786	0.651668
CG5224	FBgn0034354	1.27e-09	4.63341e-07	8.8962	1.40248	0.00249687	0.00340598	2.6026	0.32284	4.7393	4.77538	4.84424	4.84934	4.88315	4.68457	6.09548	6.2868	6.18409	6.19977	6.19928	6.42769	5.09521	4.99098	5.24126	5.33515	5.15479	5.26441
CG6304	FBgn0032624	0.165002	0.162699	0.782511	1.40182	0.0428886	0.0255078	1.36766	2.14652	0.36699	0.662378	0.255529	0.0417192	0.161931	0.277355	0.144183	2.64865	2.69751	2.16467	1.47399	0.232679	3.21843	4.40342	0.102611	0.300174	0.219124	0.365456
Hsp60C	FBgn0031728	0.335497	0.245293	0.474311	1.40067	0.124239	0.0540766	0.905742	2.30756	2.31988	1.38846	0.612918	0.0927989	0.0603904	0.580811	0.223785	4.08549	4.21399	3.82615	3.04226	1.03539	4.72911	6.20946	0.305348	0.433438	0.639825	0.971592
dro5	FBgn0035434	4.21e-06	8.31976e-05	5.37572	1.40052	2.13e-06	2.34335e-05	5.67162	1.4962	7.83849	7.86957	7.8164	7.13169	7.27263	7.16202	8.73746	9.28979	9.69877	9.01602	8.96848	9.05557	9.38016	9.16431	9.4686	9.21299	8.95946	9.04563
CG43638	FBgn0263647	0.241209	0.20427	0.617606	1.39803	0.0996563	0.0456251	1.0015	2.02324	1.61544	0.655319	0.609355	0.0863604	0.206196	0.26056	0.33721	3.2408	3.49619	3.01257	2.31755	0.872863	3.62717	5.22598	0.0966955	0.170239	0.697218	0.628461
sxe2	FBgn0038398	5.28e-06	9.37913e-05	5.27737	1.38847	1.67e-05	9.42099e-05	4.77728	1.23626	5.26418	5.48064	5.37721	3.42861	3.9865	4.05879	6.90272	6.78199	6.60272	6.31501	6.28837	5.87142	6.76672	6.56294	6.50113	6.58859	6.28353	6.12696
CG5693	FBgn0040989	0.112384	0.126249	0.949296	1.38154	0.061538	0.032482	1.21086	1.66301	0.722086	0.398528	0.123377	0.128092	0.136508	0.0991751	0.226181	2.22971	2.93271	1.34881	1.63974	0.413981	2.26132	3.81724	0.154455	0.11363	0.100915	0.169133
CG12861	FBgn0033953	0.375874	0.260549	0.424958	1.37459	0.131875	0.0566616	0.879838	2.41672	2.56891	1.44395	1.06516	0.310259	0.0588989	0.649675	0.217418	4.35799	4.62637	4.1	3.49919	1.54648	5.32808	6.70001	0.30009	0.387473	0.762482	1.19198
CG33346	FBgn0053346	0.0110103	0.024098	1.9582	1.37312	0.352702	0.124578	0.452592	-0.442129	6.57159	6.31922	6.12125	6.56403	5.46073	5.74735	8.18861	7.39439	7.54844	7.16728	7.78311	8.24986	5.81328	5.57832	6.29408	5.91523	7.55536	7.55776
Phae2	FBgn0263235	0.00398314	0.0114208	2.39977	1.37029	0.401971	0.13838	0.395805	0.335202	5.12728	5.495	4.98566	5.03921	4.27281	4.4184	7.11687	6.27539	6.32657	5.98179	6.23791	6.53787	5.16883	5.50622	5.93849	5.0656	6.49461	6.44059
CG16898	FBgn0034480	1.27e-05	0.000172591	4.8962	1.37008	7.28e-06	5.33265e-05	5.13787	1.44952	4.02307	3.75766	4.00589	3.40524	2.56822	2.83441	5.46445	5.4135	5.01891	5.23361	5.09404	5.44903	5.53266	5.37983	5.22267	5.53568	5.78281	5.60818
CG31050	FBgn0051050	0.111601	0.125637	0.952332	1.36195	0.0323344	0.0210297	1.49034	1.91904	0.873108	0.419019	0.397794	0.367484	0.232465	0.429324	0.367866	2.70711	2.70079	1.92581	1.26743	1.0745	3.00513	4.03929	0.402621	0.192612	0.282532	0.612918
MtnE	FBgn0262146	0.0258575	0.0455397	1.58741	1.36084	0.0242557	0.0171322	1.61519	1.37945	3.80973	4.02395	3.44371	3.41311	3.26293	3.35611	3.81229	5.28129	6.26632	5.39165	5.94555	6.368	4.47159	5.1736	5.77054	4.77959	5.46965	5.86248
CG8701	FBgn0033287	0.417986	0.275761	0.378838	1.35599	0.187259	0.074412	0.727557	2.26091	3.49571	1.98359	1.36643	0.263724	0.619937	0.762482	0.360659	5.20276	5.35029	4.80925	4.12836	2.42155	5.8602	7.24881	0.519441	0.559053	0.963697	0.990013
Pglym87	FBgn0011270	0.258959	0.213171	0.586769	1.355	0.112712	0.0500765	0.94803	1.95691	1.98884	0.98756	0.430607	0.126787	0.282371	0.192457	0.222524	3.75565	3.49384	3.1917	2.55146	1.36063	3.76986	5.20373	0.304144	0.184253	0.637766	0.493633
CG31226	FBgn0051226	0.460002	0.291111	0.33724	1.35169	0.255794	0.0959371	0.59211	2.11311	4.26838	2.83743	1.88423	0.469586	0.494042	1.34583	0.521353	6.28861	6.23514	5.35105	5.13741	3.03181	6.56575	7.85187	0.911745	0.764789	1.30742	1.80632
betaTub85D	FBgn0003889	0.394516	0.267305	0.403935	1.34941	0.145527	0.0612264	0.837056	2.37851	2.63621	1.81298	0.869884	0.36985	0.423573	0.584958	0.100896	4.57095	4.69544	4.31127	3.34059	1.2216	5.36135	6.65957	0.433681	0.673748	0.781209	1.21845
CG7046	FBgn0038979	0.303381	0.232005	0.518012	1.34574	0.10141	0.0461549	0.993919	2.22019	1.48908	1.6777	0.864951	0.755057	0.561134	0.596474	0.192612	3.95448	3.92187	3.23681	2.54745	0.886271	4.51104	5.74052	0.440744	0.546643	0.669815	1.06516
CG16884	FBgn0028544	5.89e-05	0.000525102	4.22988	1.34546	0.00406939	0.00480163	2.39047	0.789277	1.75603	1.96548	1.87278	0.588059	0.886995	0.720189	3.0122	3.27453	3.34393	1.21243	1.1537	1.06221	2.81264	1.98679	3.16268	1.25883	1.24863	1.45106
Mst33A	FBgn0028412	0.242831	0.205153	0.614696	1.34494	0.0673281	0.034345	1.1718	2.20184	0.549584	0.950704	0.590289	0.0990353	0.103672	0.263663	0.0615605	2.91798	3.14586	2.56202	1.92305	0.558243	3.57174	5.07399	0.0503807	0.0902872	0.412717	0.653665
CG14356	FBgn0038207	0.0360795	0.0578553	1.44274	1.33957	0.504311	0.1658	0.297302	-0.390798	2.01264	1.31485	1.1974	2.42649	2.14795	1.835	4.34329	1.53705	2.66326	2.47173	2.13365	2.43371	1.00381	0.650891	1.69779	1.65602	2.46975	2.71349
CG12907	FBgn0250840	0.248108	0.207831	0.605359	1.33673	0.0663509	0.034005	1.17815	2.22363	1.83135	0.603419	0.399015	0.0634428	0.0647127	0.391189	0.247557	3.29141	3.30501	2.84243	2.40282	1.05665	3.96339	5.17487	0.36643	0.433958	0.477371	0.855869
CG31870	FBgn0051870	0.293976	0.227936	0.531688	1.33646	0.134463	0.0575583	0.871397	1.95459	2.19046	0.968184	0.981502	0.489013	0.311796	0.491597	0.261795	3.90639	3.98133	3.23702	2.72837	1.34124	4.09123	5.57973	0.332954	0.132727	0.521325	0.508473
CG2267	FBgn0039792	0.270604	0.218718	0.567666	1.3326	0.0641131	0.033387	1.19305	2.3526	1.4859	0.628727	0.255805	0.0339703	0.124147	0.400347	0.11074	3.02019	3.23731	2.64104	1.9807	0.706696	3.96699	5.37493	0.0863163	0.228651	0.326319	0.572611
Iris	FBgn0031305	1.02e-06	3.26873e-05	5.9914	1.33032	1.61e-06	1.9589e-05	5.79317	1.27469	4.38765	4.55338	4.60976	4.43515	4.3502	4.05671	6.25686	5.60791	5.67699	6.09752	6.04361	6.02904	5.91091	5.71874	5.74523	6.45286	6.43502	6.36892
CG9314	FBgn0032061	0.173274	0.167928	0.761267	1.32659	0.0645788	0.0335444	1.18991	1.86438	1.59753	1.24254	0.643085	0.631136	0.553492	0.938656	1.25622	3.03217	3.17454	2.80497	2.06545	1.04345	3.65368	4.95655	0.466073	0.514632	0.768036	0.741831
CR32658	FBgn0040859	0.225769	0.196692	0.646336	1.32432	0.0711952	0.0357149	1.14755	2.05265	2.69835	1.65845	1.25114	0.725347	0.911745	1.33978	1.4219	3.92734	4.23166	3.69574	3.13982	1.83227	4.51025	5.96426	1.2914	1.2657	1.45277	1.46575
Mst98Ca	FBgn0002865	0.405407	0.271436	0.392109	1.32341	0.185955	0.0740404	0.730592	2.15317	2.94001	1.80632	0.74381	0.21967	0.181811	0.608038	0.0632239	4.53506	4.86208	4.45589	3.51761	1.68267	5.08163	6.55752	0.310509	0.424125	0.702316	1.04122
CG33284	FBgn0053284	0.268362	0.217716	0.571279	1.32181	0.082703	0.0397316	1.08248	2.15603	2.14817	0.627491	0.198707	0.0553292	0.0574667	0.430557	0.20807	3.41323	3.31851	2.62687	2.26529	1.11019	3.86615	5.2825	0.293793	0.321208	0.542028	0.512354
CG9664	FBgn0031515	4.74e-07	1.97203e-05	6.32422	1.3198	6.04e-05	0.000230019	4.21896	0.815178	3.64535	3.47081	3.53516	3.70676	3.48921	3.608	4.77794	4.96183	4.87096	4.59325	4.30325	4.74156	4.33333	4.21237	4.55116	4.53742	4.16229	4.61048
CG10396	FBgn0033020	0.201152	0.183433	0.696476	1.31921	0.062314	0.0327436	1.20541	2.00446	1.97767	1.44518	0.96703	0.608075	0.841263	0.924642	1.14523	3.40553	3.79675	3.10683	2.27804	1.17841	4.0121	5.43986	0.951305	0.919274	1.20885	1.27848
Mst35Ba	FBgn0013300	0.268428	0.217716	0.571172	1.31822	0.0989222	0.0453823	1.00471	2.03183	1.2178	1.19282	0.548542	0.210695	0.327057	0.289117	0.154455	3.1176	3.64176	2.92376	2.23416	1.00304	3.69465	5.25265	0.107344	0.278186	0.539402	0.522953
CG33340	FBgn0053340	0.414225	0.274392	0.382764	1.31737	0.180129	0.0722284	0.744416	2.21689	3.28013	1.66489	1.03881	0.250017	0.0556666	0.584414	0.341053	4.69088	4.90398	4.38234	3.65471	1.70753	5.38784	6.90057	0.34607	0.565107	0.910791	1.20855
CG42355	FBgn0259701	0.116804	0.129648	0.932542	1.31184	0.0294275	0.0195645	1.53125	1.91818	0.744372	0.387473	0.444751	0.609355	0.866052	0.761043	0.469053	2.51244	2.53062	1.8927	1.6723	0.812925	2.80784	4.14008	0.383213	0.521325	0.319361	0.362326
sgl	FBgn0261445	1.02e-06	3.26873e-05	5.9914	1.3108	0.00089867	0.00166697	3.0464	0.633026	4.7687	4.53622	4.70885	4.88066	4.60414	4.73877	6.30591	5.76554	5.87472	6.01603	6.09752	6.14912	5.28454	5.20287	5.42544	5.31884	5.56345	5.79037
CG6628	FBgn0036072	0.172326	0.167449	0.763649	1.30785	0.028089	0.0189332	1.55146	2.2498	2.30447	0.28136	0.992276	0.201704	0.132872	0.234266	0.219273	3.84891	3.43347	2.08351	1.95574	1.655	3.20649	5.04872	2.07231	0.390274	0.44976	0.389684
CG9459	FBgn0037764	0.00432355	0.0121051	2.36416	1.30765	0.871549	0.253607	0.0597082	-0.0615873	3.43018	3.53441	3.38915	3.26143	3.01993	2.74669	5.69958	4.28208	4.29504	4.07971	3.79675	3.64238	3.9527	2.74538	3.47089	3.01257	3.20172	3.62085
CG32302	FBgn0052302	3.13e-05	0.000327707	4.50446	1.30719	0.923215	0.264883	0.0346971	-0.0199259	0.367484	0.285075	0.122672	1.00234	0.77603	0.545441	1.49504	1.26918	1.93259	2.09336	1.98322	1.42892	0.126197	0.0951941	0.494062	0.243505	0.424671	0.430657
CG32240	FBgn0052240	0.202604	0.18412	0.693352	1.30656	0.0514602	0.0288333	1.28853	2.09649	1.5726	0.543995	0.230863	0.225543	0.10774	0.38584	0.38146	3.13239	2.7533	2.45498	2.09336	0.698748	3.26961	4.86104	0.506271	0.359956	0.52216	0.457454
CG42853	FBgn0262100	0.16002	0.159176	0.795826	1.30542	0.0420379	0.0251769	1.37636	1.98301	0.551386	0.426079	0.461537	0.0650001	0.0657907	0.514632	0.37188	2.55799	2.4254	1.97406	1.4192	0.666191	2.92838	4.38801	0.0716286	0.19615	0.377411	0.385337
scpr-A	FBgn0037889	0.305543	0.232997	0.514928	1.30516	0.0579983	0.0312747	1.23658	2.55544	3.7918	1.22123	1.78098	2.66746	3.00347	2.93651	0.551182	5.19085	4.96747	4.01982	3.71686	2.74652	4.92657	6.82067	2.7131	1.0086	1.17074	1.01055
CG1288	FBgn0250845	0.313896	0.236796	0.503214	1.30399	0.0865381	0.0410114	1.06279	2.31587	1.68249	0.951033	0.609158	0.147842	0.067044	0.211687	0.0929669	3.32297	3.73871	3.02668	2.44352	0.779332	4.37928	5.63327	0.177744	0.382509	0.454609	0.744547
CG10407	FBgn0038395	0.150676	0.153191	0.821956	1.30042	0.0216302	0.0157439	1.66494	2.2351	4.90381	2.36319	3.91944	2.45078	2.60563	4.39159	3.50872	6.10045	5.47855	5.61936	5.35105	5.01058	5.94094	7.25189	4.69892	4.4921	3.98972	3.9079
CG9642	FBgn0034183	2.77e-07	1.49213e-05	6.55752	1.29695	3.4e-07	7.50989e-06	6.46852	1.27267	2.07745	2.15242	2.05666	1.94095	2.11679	2.02256	3.45109	3.30279	3.42349	2.79062	2.92663	2.53062	3.52028	3.09641	3.48787	1.77224	1.75618	2.07231
CG15306	FBgn0030191	0.176264	0.169911	0.753836	1.29685	0.0301386	0.0199633	1.52088	2.21837	0.132971	0.634971	0.506271	0.129121	0.243354	0.518393	0.123302	2.3564	2.68506	2.06868	1.49251	0.351975	3.06442	4.51852	0.346379	0.360865	0.491597	0.707161
CG10252	FBgn0039104	0.477752	0.297911	0.320797	1.29435	0.274623	0.101737	0.561263	2.02203	4.11087	2.18014	1.68421	0.481148	0.340467	1.12206	0.420076	5.64321	5.79498	5.29885	4.53818	2.71503	6.20462	7.54937	0.2873	0.584638	1.05636	1.49196
Obp44a	FBgn0033268	0.00107245	0.00439626	2.96962	1.29203	3.77e-05	0.000163771	4.42366	1.91219	6.69865	5.7717	5.7788	5.16504	5.13754	5.29885	6.79913	7.36465	7.96146	6.82067	6.4068	6.32657	7.76361	8.26067	7.96146	6.35688	6.16337	6.64373
CG14297	FBgn0038655	0.174654	0.168984	0.757821	1.29075	0.0420884	0.0251884	1.37584	2.0348	1.39997	0.598613	0.350331	0.330172	0.586996	0.566098	0.453431	2.74261	3.02512	2.36975	1.98545	1.02637	3.20338	4.69733	0.552612	0.372956	0.471802	0.544419
CR42767	FBgn0261835	0.185407	0.175252	0.731874	1.29024	0.0425152	0.025356	1.37146	2.08382	0.85437	0.717107	0.60139	1.16836	1.06082	1.16795	0.363887	2.86013	2.81956	2.24266	1.61266	0.772857	3.26503	4.765	0.394289	0.662378	0.637858	1.04096
CG31909	FBgn0051909	0.131216	0.139789	0.882013	1.29019	0.039806	0.0242724	1.40005	1.83616	0.85364	0.786403	1.03098	1.03026	0.499977	0.872727	0.828174	2.66047	3.05295	2.00652	0.930409	0.786825	3.1761	4.39705	0.606362	0.828174	0.640414	0.921663
Atg8b	FBgn0038539	0.251561	0.209429	0.599357	1.28779	0.0860781	0.0408436	1.06511	1.999	1.66348	0.249841	0.522544	0.235795	0.351324	0.246472	0.179011	2.97675	3.14349	2.31867	1.43977	0.36855	3.47227	4.83855	0.122044	0.0983365	0.307596	0.724752
CG9602	FBgn0038175	0.24986	0.20857	0.602303	1.28762	0.116068	0.0512421	0.935287	1.80365	1.87278	0.85104	0.409013	0.31184	0.237905	0.377404	0.374917	3.45681	3.16396	2.71467	2.1075	1.25218	3.45701	4.97409	0.112671	0.199322	0.288057	0.448445
CG8840	FBgn0031531	0.119391	0.131473	0.923028	1.287	0.028174	0.0189571	1.55015	1.91483	0.430557	0.742471	0.250751	0.114165	0.362125	0.257378	0.416313	2.42495	2.44352	1.86743	1.25071	0.644218	2.75071	4.04481	0.37276	0.451912	0.321854	0.626761
CG31740	FBgn0051740	0.474332	0.296441	0.323918	1.28616	0.267966	0.0996304	0.57192	2.02274	4.3382	2.38496	1.56171	0.193513	0.207229	0.907745	0.523129	5.77923	5.841	5.17593	4.6601	2.91992	6.24119	7.57579	0.536128	0.596938	1.2247	1.84829
CG15120	FBgn0034454	0.000128279	0.000923231	3.89184	1.28555	0.0436397	0.0258688	1.36012	0.52338	0.673422	1.18278	0.707329	0.841685	0.826866	0.518921	2.54716	2.0754	1.79761	2.30913	2.34353	2.43162	1.5254	0.881348	1.72693	2.28411	2.34481	2.5998
CG10734	FBgn0034082	0.264574	0.215688	0.577453	1.28492	0.0640495	0.0333721	1.19348	2.23912	1.06082	1.41124	0.710197	0.328989	0.377404	0.378699	0.358964	3.20915	3.46892	2.98351	2.38345	0.623669	4.04241	5.33882	0.518367	0.469758	0.583208	0.753093
S-Lap3	FBgn0045770	0.369901	0.258071	0.431914	1.28272	0.119948	0.0525959	0.921007	2.30507	1.88752	1.56721	0.545142	0.0645607	0.185495	0.566944	0.0520407	3.77468	4.02129	3.6239	2.72184	1.11862	4.6957	6.11958	0.0997854	0.367866	0.533799	0.802448
CG14739	FBgn0037987	0.174875	0.169103	0.757272	1.27842	0.0715764	0.0358622	1.14523	1.75197	1.0657	0.465284	0.0682936	0.0725764	0.0745432	0.175768	0.103119	2.68364	2.64778	1.7428	1.77159	0.51938	2.70468	4.0699	0.0806153	0.219451	0.272226	0.382509
CR9284	FBgn0046297	0.394821	0.267358	0.4036	1.27822	0.175362	0.0708213	0.756065	2.08604	2.54919	1.77478	1.037	0.249673	0.341091	0.400715	0.11081	4.28321	4.80161	3.82133	3.51877	1.637	4.90398	6.42553	0.289557	0.376082	0.463794	0.897084
CG4669	FBgn0035598	0.306484	0.233437	0.513592	1.27795	0.0990587	0.0454304	1.00411	2.13908	1.99012	0.623225	0.441012	0.13309	0.19144	0.379874	0.151392	3.32666	3.41014	3.00622	2.1727	0.981634	4.02655	5.37786	0.067166	0.187839	0.379647	0.612918
mre11	FBgn0020270	3.88e-05	0.000384985	4.41117	1.27607	0.107859	0.0484264	0.967144	-0.351285	2.51474	2.41899	2.46827	3.15465	2.94904	2.97407	3.73611	3.71709	3.77701	3.82331	3.76776	4.04047	2.15468	1.54499	2.64848	2.85219	3.02306	3.17281
CG8517	FBgn0034472	0.397615	0.268338	0.400537	1.27549	0.15932	0.0656117	0.79773	2.18192	3.04568	1.32197	0.585783	0.288373	0.310509	0.724752	0.141883	4.26838	4.36963	3.71083	3.27699	1.50199	4.93582	6.32311	0.240257	0.573201	0.846569	0.839503
CG2650	FBgn0000092	0.00116882	0.0046781	2.93225	1.2717	0.15641	0.0647342	0.805735	0.454612	0.878045	0.800349	0.960534	2.04697	2.27581	1.89475	2.69453	2.37082	1.38867	2.70338	3.05825	2.74212	1.46862	0.776437	1.7577	2.56779	2.7533	2.51369
CG5538	FBgn0038052	0.271275	0.219073	0.56659	1.26973	0.0567347	0.0307841	1.24615	2.32096	1.92971	1.8192	1.09908	1.44602	1.45528	1.40778	0.799849	3.84065	4.0167	3.55697	2.91992	1.6466	4.72384	5.98859	1.09846	1.2213	1.24642	1.60752
CG4286	FBgn0034601	0.257438	0.212716	0.589327	1.26887	0.095467	0.0441855	1.02015	1.93111	1.88558	0.432104	0.623669	0.376918	0.280799	0.247918	0.119058	3.24264	3.38628	2.93852	2.06446	1.09135	3.50755	4.86134	0.365802	0.240555	0.289429	0.610534
CG14125	FBgn0036232	0.01572	0.031314	1.80355	1.26809	0.547259	0.177101	0.261807	-0.279403	7.54844	8.18861	8.22426	9.10841	7.97447	8.37085	10.3889	8.63923	8.73746	8.9955	9.35909	9.35234	7.29194	7.7902	8.04096	8.24867	9.03324	9.01602
CG13155	FBgn0033723	0.0243504	0.0434175	1.61349	1.26742	0.466838	0.156206	0.330834	-0.369981	0.42291	1.18032	1.44128	0.608768	0.586665	1.06375	3.60167	1.63974	1.60535	0.737235	1.60535	0.666099	0.742131	0.158941	1.03349	0.553845	0.99342	0.870421
CG32141	FBgn0052141	0.23524	0.201464	0.628489	1.26439	0.0556259	0.0303496	1.25472	2.14402	0.726695	0.955839	0.322826	0.240555	0.49288	0.473777	0.102089	2.87091	2.82554	2.68689	1.96096	0.744372	3.43098	4.80925	0.1972	0.463794	0.44142	0.609355
Mst87F	FBgn0002862	0.412006	0.273567	0.385096	1.26345	0.2319	0.0887018	0.634699	1.87187	4.00634	2.614	1.96829	0.497191	0.856925	1.50767	1.47152	5.40886	5.49859	5.09521	4.28142	2.88998	6.05067	7.30931	0.844251	0.794095	1.07125	1.78569
CG32192	FBgn0052192	0.304252	0.232446	0.516767	1.25998	0.132751	0.0569613	0.876962	1.8934	2.10651	1.29211	1.04516	0.374293	0.306083	0.806726	0.564459	3.78209	3.87719	3.29235	2.61539	1.13286	4.08681	5.62535	0.411816	0.530048	0.818644	1.05721
CG31287	FBgn0051287	0.101308	0.117508	0.994356	1.25719	0.0415291	0.0249629	1.38165	1.61661	1.03327	1.02636	0.826866	0.596787	0.419216	0.841685	1.53835	2.65037	2.46934	2.22203	1.57752	0.760194	2.80734	4.31732	0.611662	0.545142	0.50223	1.05089
Cyp12d1-d	FBgn0053503	0.00144278	0.00542784	2.8408	1.25247	4.66e-06	3.99429e-05	5.33161	2.38643	2.02554	2.68259	2.57276	1.66218	1.97457	2.23523	3.59618	4.33036	3.11176	3.37571	3.35651	3.12379	5.09122	4.63085	4.71811	4.1318	4.82061	4.88066
CG8136	FBgn0037616	0.146998	0.150573	0.832689	1.2522	0.0421667	0.0252136	1.37503	1.83622	1.92055	1.05343	0.878314	0.811241	0.893146	0.838311	1.47507	3.02498	3.10883	2.88944	2.32604	1.21845	3.4954	4.89932	0.966235	0.903991	1.15195	1.01254
CG15199	FBgn0030270	0.00210483	0.00714596	2.67678	1.25138	0.0259872	0.0179462	1.58524	0.814384	5.64841	5.28775	4.99929	3.99842	4.38287	4.24747	6.99557	6.35688	6.33712	5.89572	5.98859	7.05955	6.03623	6.0648	6.27755	5.73819	6.46693	6.57159
CG31639	FBgn0051639	0.406466	0.271638	0.390976	1.25049	0.166979	0.0681402	0.777338	2.13833	2.81031	1.8207	0.987679	0.412541	0.364301	0.54739	0.200371	4.4184	4.75139	4.19365	3.68145	1.5649	5.02429	6.48386	0.525533	0.45913	0.839152	1.23229
Cyp12d1-p	FBgn0050489	0.000657056	0.00308777	3.1824	1.24642	1.87e-05	0.000102083	4.72816	1.86314	2.88375	3.6721	3.40125	2.74864	2.82072	3.18605	4.3369	5.11154	4.24791	4.37664	4.26108	3.91883	5.41823	5.04994	5.07836	4.53393	5.12707	5.19923
CG12860	FBgn0033954	0.451363	0.288161	0.345474	1.24391	0.212021	0.0822707	0.673621	2.10642	3.65219	1.7519	1.4503	0.518393	0.490972	0.687029	0.196798	5.08862	5.30069	4.65395	4.11434	2.46507	5.579	7.07258	0.522078	0.479969	1.02618	1.11803
CG13898	FBgn0035161	0.232764	0.200448	0.633084	1.24297	0.059463	0.0317844	1.22575	2.05872	1.31662	0.798904	0.586852	0.234409	0.416923	0.518638	0.394372	3.116	2.92091	2.67534	2.26249	0.75731	3.54218	4.90771	0.428656	0.297604	0.304144	0.681452
scpr-C	FBgn0037879	0.253882	0.210659	0.595368	1.24274	0.0553622	0.0302797	1.25679	2.20019	4.24246	2.10025	2.51807	4.92755	5.18585	5.28651	1.85163	5.48472	5.25265	4.41519	4.43133	3.62046	5.26218	7.07948	3.11971	2.75628	2.55286	3.09042
CG30039	FBgn0050039	0.357351	0.253003	0.446905	1.24157	0.150019	0.0626846	0.823854	1.99475	2.06185	1.67364	0.453269	0.0919184	0.0964848	0.46365	0.356199	3.73611	3.82118	3.27718	2.6474	0.637766	4.3781	5.69252	0.102394	0.488934	0.869118	0.812128
Mst84Dc	FBgn0004174	0.44763	0.286704	0.349081	1.24118	0.251985	0.094756	0.598625	1.90271	3.59266	2.25614	1.53159	0.360696	0.600713	0.869884	0.538175	5.30409	5.26168	4.6601	3.89955	2.53991	5.51383	7.18577	0.388915	0.623669	0.853597	1.34505
CR17567	FBgn0040994	0.446997	0.286579	0.349695	1.24039	0.197497	0.0776422	0.704439	2.15253	3.6377	2.31197	1.44518	0.177403	0.348678	0.860246	0.308448	5.45347	5.35409	4.68933	4.38108	2.556	5.75722	7.21066	0.884565	0.793823	1.06524	1.39715
Cpr66D	FBgn0052029	3.32e-06	7.17896e-05	5.47886	1.23855	0.00573696	0.00611026	2.24132	0.513005	4.07187	4.16421	4.00054	6.84181	6.90208	6.90272	5.24126	5.65857	5.05242	5.82759	5.60474	5.69657	4.80636	4.25429	4.71498	5.61741	5.6477	5.76727
CG31788	FBgn0051788	0.369846	0.258071	0.431979	1.23735	0.124091	0.0540265	0.90626	2.19614	2.8005	1.92502	1.50767	0.207855	0.609355	0.980488	0.69829	4.67065	4.57631	3.98133	3.30379	1.76161	5.1545	6.69865	0.968479	0.930965	1.09135	1.43322
CG5968	FBgn0032588	0.290252	0.226717	0.537225	1.23549	0.0867617	0.0411038	1.06167	2.08304	1.45357	1.1974	0.363739	0.346335	0.12353	0.545441	0.199892	3.22706	3.29424	2.80007	2.42777	0.651993	3.79675	5.17889	0.288182	0.227291	0.681042	0.569166
CG18449	FBgn0033285	0.403592	0.270785	0.394057	1.23441	0.184606	0.0736124	0.733754	2.00702	3.22785	1.50581	1.08148	0.394965	0.29619	0.533741	0.34119	4.33482	4.84236	3.98905	3.53516	1.67998	4.8119	6.4856	0.538712	0.667209	0.825015	0.861593
CG3330	FBgn0039511	0.347645	0.249899	0.458864	1.23146	0.119958	0.0525959	0.920971	2.10915	2.45961	1.04288	0.644961	0.186134	0.119362	0.410928	0.191825	3.74622	3.90379	3.33751	2.69083	1.40407	4.27766	5.82759	0.369642	0.36985	0.839736	0.793721
dj	FBgn0019828	0.367597	0.257185	0.434628	1.22965	0.129044	0.0557288	0.889262	2.14081	2.48419	1.33742	0.988488	0.290729	0.0513981	0.369408	0.40646	4.00308	4.08949	3.42416	3.2338	1.05343	4.7062	6.08866	0.437663	0.497191	0.837958	0.939459
Hsp60D	FBgn0032525	0.114764	0.128133	0.940194	1.227	0.026218	0.0180708	1.5814	1.82843	0.319047	0.153145	0.0625024	0.101384	0.067507	0.110262	0.165199	1.89472	2.15578	1.60742	1.17031	0.203008	2.41174	3.49384	0.114392	0.201606	0.166746	0.0994473
CG17377	FBgn0031859	0.409248	0.272405	0.388013	1.22698	0.181544	0.0726512	0.741018	2.03515	3.22938	1.63901	1.12432	0.105959	0.305639	0.849321	0.312993	4.63682	4.72384	4.24452	3.6843	1.93223	4.91385	6.54546	0.63887	1.06082	1.1858	1.53164
Tim17b2	FBgn0020371	0.227299	0.197625	0.643402	1.22349	0.0487181	0.0278334	1.31231	2.10883	0.586758	0.699383	0.380869	0.0922723	0.0966867	0.27744	0.144924	2.45265	2.73991	2.41353	1.77933	0.525702	3.34377	4.547	0.102736	0.0849389	0.437663	0.513294
Mis12	FBgn0035725	5.92e-07	2.32047e-05	6.22768	1.22225	5.01e-05	0.000201765	4.30016	0.786515	1.89585	2.10992	1.91192	2.51399	2.23523	2.12807	3.4115	3.16618	3.00676	3.3584	3.46892	3.69502	2.71925	2.63589	2.92211	3.26503	3.20843	3.26353
soti	FBgn0038225	0.207486	0.186909	0.683011	1.22185	0.0410293	0.0247714	1.38691	2.09883	0.50162	0.536128	0.563553	0.312209	0.289117	0.300174	0.37587	2.57664	2.31434	2.03202	1.41974	0.37635	3.30249	4.54394	0.0513635	0.150693	0.389684	0.545441
CG31077	FBgn0051077	0.0158979	0.0315997	1.79866	1.22092	0.450458	0.151821	0.346346	-0.339549	4.86527	4.97439	4.89298	5.58275	4.40362	4.6757	7.21648	5.57417	5.60474	5.94555	6.42283	6.33701	4.34293	4.64194	4.72911	5.33629	6.19172	6.43359
CG6255	FBgn0038708	0.236878	0.202246	0.625475	1.21997	0.0870337	0.0411579	1.06031	1.82598	1.32966	0.965641	0.513385	0.543802	0.319812	0.681042	0.19454	3.07959	3.19446	2.614	2.07893	1.11495	3.24657	4.69996	0.340085	0.347963	0.451912	0.760194
CG3213	FBgn0031545	0.407506	0.272026	0.389866	1.21606	0.147469	0.0618796	0.831299	2.19371	2.63945	1.38409	0.551445	0.213693	0.319657	0.739461	0.029892	4.06208	4.1312	3.80644	3.08406	1.46666	4.80084	6.169	0.186282	0.38542	0.481296	0.989493
scpr-B	FBgn0037888	0.155438	0.15648	0.808443	1.2127	0.010995	0.00967853	1.9588	2.40278	2.05683	0.397859	0.926683	1.70165	1.89203	1.96322	0.540406	3.40872	3.07035	2.1454	1.84887	1.43977	3.46603	5.12272	2.00097	0.761927	0.799307	0.838887
CG34161	FBgn0085190	0.178996	0.171571	0.747157	1.20721	0.0538677	0.0297342	1.26867	1.80758	1.07125	0.533836	0.279056	0.13195	0.383908	0.101253	0.233974	2.6835	2.58831	2.10909	1.36917	0.551445	2.71503	4.1979	0.393956	0.117429	0.277397	0.52608
CG16894	FBgn0034483	0.224112	0.195716	0.649535	1.20494	0.0638092	0.0332892	1.19512	1.91914	1.2087	0.363783	0.290621	0.141771	0.064839	0.206085	0.0890456	2.59746	2.79142	2.16001	1.77541	0.477732	3.07753	4.37197	0.171011	0.193513	0.374293	0.219323
Tsp39D	FBgn0032943	5.61e-08	5.66116e-06	7.25104	1.20353	1.4e-06	1.819e-05	5.85387	0.894641	2.856	2.69904	2.88159	2.9945	2.96226	2.92806	3.98277	4.11386	3.9506	3.71509	3.9186	3.84256	3.75986	3.43991	3.92078	3.75599	3.71686	3.84267
CG42821	FBgn0262003	2.31e-05	0.000263365	4.63639	1.19908	0.937792	0.267993	0.0278935	0.0143398	5.69252	6.06609	5.84319	7.30115	7.50663	7.71706	6.76363	7.44509	6.99032	7.17599	7.10652	7.10431	5.81681	5.81681	6.01118	6.68304	6.15967	6.25135
S-Lap2	FBgn0052351	0.401623	0.269987	0.396181	1.19815	0.139085	0.0591225	0.85672	2.18324	2.36769	1.90789	0.990747	0.674629	0.629437	1.03623	0.36512	4.15602	4.33964	3.98781	3.12379	1.44769	4.95311	6.42221	0.440744	0.606362	0.777257	1.29778
CG3517	FBgn0038706	0.319008	0.238449	0.496198	1.19732	0.0953563	0.0441556	1.02065	2.08481	2.11835	0.609355	0.419765	0.152222	0.0431982	0.247022	0.145571	3.20172	3.39215	2.73874	2.17901	0.858183	3.9186	5.24051	0.2428	0.040818	0.415152	0.679062
CG30430	FBgn0050430	0.433739	0.281578	0.362772	1.19239	0.229501	0.0879599	0.639215	1.86395	3.23627	1.97591	0.986898	0.175581	0.345806	0.534314	0.508473	4.50059	4.76718	3.84703	3.76413	1.67708	5.14632	6.43502	0.209575	0.154663	0.826866	1.00742
ocn	FBgn0041102	0.452079	0.288502	0.344786	1.1905	0.200562	0.078664	0.697751	2.0746	3.17005	2.03147	1.35821	0.326293	0.504653	0.843833	0.393297	4.89639	4.84156	4.04601	3.69155	1.51666	5.47731	6.87867	0.427556	0.48809	1.04393	1.20454
CG34220	FBgn0085249	0.0220943	0.0402729	1.65572	1.18801	0.466862	0.156206	0.330811	0.339819	9.10065	10.3621	9.82899	10.0023	8.95946	9.48388	11.863	10.3889	10.6038	10.9289	11.0317	10.8729	9.55952	10.3498	10.4018	10.1005	11.0401	11.071
CG16904	FBgn0037763	0.00423641	0.0119172	2.373	1.18779	0.938241	0.267993	0.0276856	-0.0267111	6.69515	6.96485	7.00976	6.69358	6.06919	6.26333	8.97373	7.61771	7.64169	7.59119	7.35981	7.2953	7.31633	6.49376	6.77954	6.54923	6.7283	7.14605
CG15425	FBgn0031591	0.196508	0.181169	0.70662	1.18733	0.0561323	0.0305381	1.25079	1.83535	0.497191	0.71254	0.359722	0.340607	0.0872359	0.1972	0.126022	2.4025	2.60293	2.02388	1.37753	0.676388	2.7581	4.22291	0.0944937	0.246472	0.36512	0.424798
CG2127	FBgn0033286	0.458673	0.290637	0.338497	1.18632	0.177792	0.071521	0.750088	2.21809	3.36286	1.95453	1.00112	0.25363	0.273981	0.687513	0.208526	4.69247	4.97647	4.55937	3.71444	2.01021	5.43844	6.96667	0.567649	0.381745	0.735766	1.09431
CG16782	FBgn0029659	0.297889	0.229507	0.525946	1.18396	0.0996397	0.0456251	1.00157	1.94148	1.71228	0.374837	0.516953	0.19278	0.268266	0.494407	0.075094	2.98351	3.09734	2.57209	1.97767	0.866996	3.34904	5.01934	0.0601271	0.172052	0.370573	0.570569
CG6380	FBgn0032632	0.216369	0.191811	0.664805	1.18298	0.0448876	0.026342	1.34787	2.02957	0.609355	0.655939	0.27641	0.0598836	0.060865	0.149322	0.083557	2.33667	2.67042	1.99543	1.44057	0.377824	3.10883	4.36533	0.156255	0.114896	0.240585	0.434731
CG4988	FBgn0032372	0.109525	0.124184	0.960487	1.18274	0.235586	0.0897649	0.627851	0.854456	0.981502	0.438417	0.262153	0.120044	0.368122	0.186356	0.0775657	2.46005	2.69267	1.98523	1.55791	0.50162	2.13049	2.0534	0.0615508	0.107168	0.0482823	0.162551
CG5539	FBgn0034907	0.237894	0.202606	0.623617	1.17889	0.0784782	0.0382848	1.10525	1.82537	0.975626	0.612918	0.503811	0.263836	0.514632	0.583099	0.0829266	2.74129	2.80481	2.54047	1.47566	0.631136	3.02227	4.39184	0.154353	0.448445	0.515331	0.662378
CG34241	FBgn0250825	0.179064	0.171571	0.746992	1.17869	0.0270058	0.01845	1.56854	2.07982	1.06375	1.18363	0.985489	0.320056	0.537902	0.240215	0.50765	2.80845	3.45285	2.36568	1.89472	1.66791	3.44677	4.87761	1.14794	1.46671	1.66117	1.8763
CG5614	FBgn0038359	0.340154	0.247363	0.468324	1.17825	0.11549	0.0510265	0.937456	2.01271	1.86028	1.25376	0.340547	0.226256	0.108099	0.305348	0.169512	3.28013	3.53971	3.03888	2.07162	1.08132	3.98137	5.39545	0.115896	0.15382	0.268266	0.811365
CG6432	FBgn0039184	0.0113305	0.0245383	1.94575	1.17701	0.771401	0.23102	0.11272	-0.117095	3.01895	3.22825	3.33676	3.30581	2.8387	2.80333	5.34759	3.82945	3.93795	3.76273	3.43347	3.69106	3.6106	2.39679	3.22528	2.93784	3.08637	3.69385
CG9975	FBgn0034435	0.316903	0.237783	0.499074	1.17689	0.122925	0.0536837	0.91036	1.86997	1.73997	0.717514	0.521951	0.0592635	0.170975	1.01172	0.048705	3.10825	3.35315	3.01272	1.93223	0.825015	3.55394	4.9204	0.115016	0.276819	0.441448	0.494234
CG4218	FBgn0250844	0.335579	0.245315	0.474205	1.17638	0.126827	0.0549035	0.896788	1.92379	2.24406	0.982374	0.884565	0.2033	0.133959	0.578046	0.358087	3.6601	3.62197	3.27728	2.35377	0.957511	3.97032	5.48139	0.430657	0.392099	0.532716	0.893964
CG42659	FBgn0261531	0.262208	0.214689	0.581354	1.17519	0.055031	0.0301445	1.25939	2.12276	1.47434	0.731394	0.460233	0.173754	0.185901	0.44976	0.300608	2.8005	3.09042	2.27975	1.96802	0.673748	3.82574	4.8491	0.359413	0.153242	0.504653	0.650574
eIF4E-5	FBgn0035823	0.298496	0.229755	0.525061	1.17479	0.0936482	0.0435331	1.0285	1.96832	1.52036	0.985029	0.453431	0.213161	0.150891	0.29189	0.0887068	3.12433	3.27015	2.87748	2.1075	0.788625	3.69833	4.91231	0.253134	0.192612	0.582175	0.518393
CG43755	FBgn0264086	0.277264	0.221496	0.557107	1.17472	0.0626549	0.0328601	1.20304	2.11785	1.41154	0.597634	0.437663	0.347963	0.492144	0.439315	0.2033	2.85219	2.9155	2.57276	2.08877	0.828292	3.56658	5.01851	0.215295	0.268393	0.429179	0.634858
djl	FBgn0037463	0.260528	0.214087	0.584146	1.17405	0.0764471	0.037583	1.11664	1.92726	1.60866	0.502095	0.603419	0.488124	0.132321	0.312802	0.438529	2.79062	3.00717	2.38911	2.32835	0.823246	3.42398	4.83172	0.240257	0.0554989	0.509705	0.799849
CG32557	FBgn0052557	0.0295411	0.0500033	1.52957	1.17349	0.10761	0.0483862	0.968147	-0.826454	2.90409	2.92282	2.87782	4.14164	2.98411	3.37398	5.15207	3.28132	3.7918	4.11036	4.32475	4.18946	1.4713	1.99371	2.76036	2.95958	3.72635	4.05981
robl62A	FBgn0028567	0.368801	0.257724	0.433208	1.17291	0.125431	0.0544534	0.901595	2.06893	2.23047	1.63974	0.52173	0.516953	0.302538	0.543654	0.529013	3.6377	3.74395	3.2495	2.48228	0.62644	4.45437	5.82026	0.324088	0.368265	0.874589	0.870421
Hsp60B	FBgn0011244	0.333564	0.244634	0.476821	1.17216	0.0873122	0.0412625	1.05893	2.16586	1.68071	0.836729	0.520518	0.173169	0.13614	0.238003	0.146388	3.09771	3.31035	3.05488	2.09112	0.930606	4.05465	5.37721	0.103672	0.26904	0.389978	0.619937
CG10859	FBgn0032520	0.231675	0.199818	0.635121	1.17179	0.0542365	0.0298746	1.26571	1.98418	0.610534	0.635425	0.333967	0.0573471	0.0953562	0.330585	0.0795989	2.60144	2.41427	2.2392	1.67411	0.37188	3.15976	4.30952	0.0631972	0.347548	0.508473	0.6374
CG14305	FBgn0038630	0.295382	0.228615	0.529616	1.16893	0.0948107	0.0439597	1.02314	1.9376	1.7	0.569166	0.404354	0.0456515	0.335529	0.295217	0.0615605	2.92872	3.19003	2.68763	1.86993	0.702316	3.44677	4.83835	0.201215	0.244259	0.383908	0.790145
spaw	FBgn0050365	0.316423	0.237684	0.499732	1.16751	0.0789477	0.0384494	1.10266	2.14412	1.86515	0.72959	0.394427	0.0866444	0.250153	0.26091	0.130857	3.29424	3.06659	2.62231	2.26541	1.10663	3.89244	5.30069	0.228415	0.249673	0.307786	0.54172
CG9016	FBgn0031751	0.460692	0.291333	0.336589	1.16692	0.186657	0.0742447	0.728956	2.14446	3.44339	1.63488	1.35932	0.579105	0.799457	0.515787	0.143894	4.77183	5.02263	4.57058	3.75165	2.47085	5.40487	6.91419	0.551918	0.802014	0.825297	1.2914
CG34168	FBgn0085197	0.512102	0.31079	0.290644	1.1668	0.292732	0.107228	0.53353	1.90049	4.13206	2.53062	1.6723	0.301629	0.420921	1.24735	0.583208	5.67699	5.57517	5.21538	4.52035	2.55365	6.01118	7.59379	0.431462	0.596347	1.00112	1.9448
CG31644	FBgn0051644	0.262355	0.214722	0.581111	1.1645	0.0646407	0.0335684	1.18949	2.01419	1.54697	0.731394	0.5735	0.318269	0.185901	0.44976	0.505177	2.986	2.85419	2.59925	1.88435	0.414771	3.46672	4.97578	0.451912	0.290563	0.609158	0.650574
S-Lap7	FBgn0033868	0.480799	0.298985	0.318036	1.16445	0.213579	0.0828155	0.670441	2.10203	3.11897	2.16875	1.04885	0.269431	0.34607	0.970887	0.149697	4.69954	4.98068	4.60302	3.68784	1.81983	5.46011	6.9367	0.245837	0.694779	0.838141	1.31835
CG3823	FBgn0029863	0.0935721	0.111212	1.02885	1.16415	0.625666	0.19637	0.203657	-0.320019	1.35366	1.20018	1.33413	0.949279	1.59294	1.2372	4.42182	1.22771	1.7309	1.79634	1.54853	1.29154	0.78837	0.648477	1.49107	0.807939	1.6617	1.94246
CG4546	FBgn0038373	0.237008	0.20226	0.625237	1.164	0.0651763	0.0337378	1.18591	1.89802	2.69139	2.12224	1.73992	1.26188	1.40353	1.42566	1.6941	4.08855	4.26292	3.72989	2.90545	1.88828	4.56279	5.97465	1.71019	1.70547	1.59983	1.68249
CG30378	FBgn0050378	0.233156	0.200585	0.632353	1.16325	0.0653918	0.0337782	1.18448	1.87855	1.04122	0.481074	0.321141	0.347025	0.269425	0.183085	0.201299	2.55207	2.57981	2.38992	1.25455	0.517063	3.09277	4.32604	0.0602742	0.228651	0.228149	0.302311
CG17376	FBgn0042189	0.482624	0.299649	0.316391	1.16038	0.237119	0.0902439	0.625034	1.99293	4.25341	2.2684	1.68447	0.592384	0.769293	1.15914	0.587584	5.45781	5.64204	5.09496	4.48526	2.73991	5.87842	7.38005	0.92659	1.2405	1.60573	1.76635
CG11043	FBgn0031831	0.0664704	0.0879876	1.17737	1.15618	0.0214728	0.0156452	1.66811	1.51369	1.40407	1.5416	1.7	1.46967	1.95574	1.89338	1.98779	2.89366	3.23274	2.73142	2.40185	1.7084	3.31328	4.39326	1.48018	1.89907	2.03657	1.92055
CR43157	FBgn0262687	0.274501	0.220366	0.561456	1.1558	0.110982	0.0495532	0.954747	1.7367	1.74406	0.759726	1.33221	1.40982	0.763748	1.10171	0.612918	3.10722	3.58325	2.63937	2.36064	0.763612	3.43347	5.05774	0.554872	0.390274	0.678339	0.834583
CG31206	FBgn0051206	0.204453	0.185091	0.689407	1.15467	0.0510641	0.0286997	1.29188	1.86462	1.40946	0.882098	0.338085	0.171011	0.184351	0.286768	0.502841	2.73852	2.85229	2.35071	1.62254	0.853597	3.09337	4.55022	0.579905	0.374997	0.526009	0.676388
CG17349	FBgn0032771	0.226944	0.197462	0.644081	1.15248	0.08451	0.0402829	1.07309	1.70184	1.03098	0.340547	0.373069	0.0562061	0.130054	0.270763	0.0784705	2.46779	2.65578	2.28411	1.46085	0.726239	2.50643	4.28152	0.0621874	0.0545885	0.234578	0.48566
CG3982	FBgn0035988	0.330508	0.243144	0.480818	1.15246	0.102465	0.0465024	0.989424	2.00898	2.60654	1.92055	1.49002	0.972575	0.915546	1.17825	1.25652	3.89955	4.31844	3.83596	2.7662	1.71898	4.86364	6.19474	0.985675	0.973025	1.17074	1.54605
CG11714	FBgn0036170	0.286076	0.225123	0.543519	1.15174	0.109426	0.048988	0.960879	1.78361	1.79634	0.724752	0.477619	0.297604	0.237905	0.29946	0.314283	2.91141	3.22825	2.6404	2.11619	1.06932	3.27036	4.92845	0.150733	0.160029	0.22286	0.292029
CG7131	FBgn0038598	0.182732	0.173717	0.738185	1.15099	0.023145	0.0165564	1.63554	2.1177	1.33117	0.709483	0.64941	0.67336	0.799483	0.805518	0.733948	2.4193	2.98979	2.60338	1.95992	0.907745	3.38764	4.7251	0.930409	0.698748	0.739597	0.761427
CG43196	FBgn0262825	0.00311361	0.00958923	2.50674	1.15086	0.893596	0.258457	0.0488588	0.0426548	3.60879	3.48212	3.89955	3.09874	2.79062	3.4439	5.52835	4.39413	4.52057	3.96579	3.88829	3.80563	4.20551	3.18717	3.72574	3.74189	3.43457	3.97074
CG3199	FBgn0038210	0.187748	0.176504	0.726425	1.14752	0.0695578	0.0351143	1.15765	1.63686	0.901544	0.415335	0.172153	0.077922	0.080836	0.184448	0.111615	2.41336	2.40663	1.92764	1.5234	0.83168	2.31299	3.99942	0.0872085	0.0715943	0.189183	0.303211
CR32661	FBgn0030356	0.341546	0.247827	0.466551	1.1474	0.1173	0.051691	0.930702	1.95509	2.26652	1.17027	0.976591	0.854333	1.12333	1.09775	0.501961	3.819	3.53462	3.25803	2.89267	1.06811	4.17867	5.55946	0.540542	0.474493	0.773467	1.09378
CG32436	FBgn0052436	0.317724	0.238167	0.49795	1.14536	0.0926438	0.0431221	1.03318	2.00738	1.79475	0.804848	0.31573	0.31573	0.272226	0.507533	0.223562	2.73691	3.39093	2.67558	1.98618	0.89926	3.75589	5.08428	0.0972772	0.489342	0.505526	0.685112
CG34107	FBgn0083943	0.280123	0.222917	0.552651	1.14465	0.0769828	0.0377864	1.11361	1.95768	1.57478	1.22809	0.708981	0.396349	0.927868	0.818478	0.675604	3.25799	3.0122	2.69066	2.04882	0.849321	3.70065	5.24929	0.434943	0.732073	0.741831	0.839152
CG13476	FBgn0036441	0.217317	0.192168	0.662906	1.1417	0.0650565	0.0337132	1.18671	1.78046	0.53886	0.725682	0.472986	0.0960663	0.32541	0.350351	0.153011	2.27482	2.73479	2.16692	1.33413	0.387876	2.86579	4.10676	0.106362	0.188995	0.227728	0.195818
Obp56a	FBgn0034468	6.04e-06	0.000104515	5.21896	1.14144	0.389528	0.135068	0.409461	-0.133457	6.54546	6.65395	6.43688	7.9241	7.84503	7.77614	7.56163	7.73537	7.76361	8.58854	8.30757	8.19297	6.35372	6.08636	6.79584	7.00744	6.97905	7.06818
CG11029	FBgn0031735	0.0338569	0.0553719	1.47035	1.13924	0.447768	0.151174	0.348947	-0.373403	1.77813	1.8765	1.79318	2.88354	1.94832	2.02011	4.14694	2.26049	2.45809	2.7304	2.73017	2.57981	1.14438	0.940102	2.24313	1.92261	2.67144	2.68307
CG9389	FBgn0037064	0.346902	0.249667	0.459793	1.13657	0.140948	0.0596759	0.850941	1.82995	2.30969	1.07471	0.828292	0.355352	0.437663	0.732983	0.419228	3.59908	3.60408	3.1268	2.40901	1.1625	3.96954	5.44658	0.286429	0.362863	0.507767	0.731574
CG5790	FBgn0032677	0.266573	0.216696	0.574184	1.13491	0.0701754	0.0353477	1.15382	1.93583	1.30346	0.394487	0.362125	0.0249053	0.0881882	0.330465	0.128331	2.52662	2.80987	2.20225	1.35492	0.54739	3.1466	4.62521	0.0957415	0.103236	0.339557	0.479896
CG32445	FBgn0052445	0.296673	0.229118	0.527722	1.1343	0.0979268	0.0450662	1.0091	1.86575	1.69518	0.566345	0.588381	0.0455074	0.102611	0.360188	0.28695	3.0692	2.89665	2.56043	2.05666	0.858717	3.39821	4.93934	0.109604	0.349665	0.346918	0.260858
CG4983	FBgn0032371	0.325903	0.241181	0.486912	1.13246	0.097905	0.0450662	1.0092	1.98427	1.96802	0.627789	0.612918	0.218564	0.485061	0.159224	0.0623617	3.26656	3.27718	2.71178	2.1247	0.822459	3.71834	5.09122	0.351975	0.044353	0.260259	0.494264
CG5024	FBgn0039373	0.245797	0.206636	0.609423	1.13155	0.0812877	0.0392751	1.08998	1.76472	1.41237	0.602678	0.216028	0.601941	0.45913	0.358164	0.367866	2.31755	2.94032	2.12224	1.32467	0.392978	3.01496	4.40126	0.10902	0.347218	0.345832	0.257963
CG30376	FBgn0050376	0.425376	0.278506	0.371227	1.13154	0.147799	0.0619665	0.830329	2.1215	2.88614	1.42287	0.645526	0.156115	0.167904	0.532289	0.098379	4.05618	4.19463	3.81431	3.1659	1.25148	4.7393	6.05759	0.52216	0.48704	0.725117	0.869884
CG32371	FBgn0052371	0.385131	0.264077	0.414392	1.13147	0.148295	0.0621089	0.828873	1.93944	2.1315	1.3827	0.600768	0.200568	0.526306	0.649904	0.0794488	3.81783	3.61209	3.35016	2.57154	1.4419	4.10016	5.68277	0.150373	0.328967	0.805518	0.864951
hydra	FBgn0031128	0.250797	0.20894	0.600678	1.12943	0.0826209	0.0397008	1.08291	1.77243	0.902287	0.885501	0.360659	0.0245722	0.202863	0.659957	0.0298578	2.73874	2.76814	2.0854	1.64338	0.627381	2.98068	4.35466	0.130384	0.270325	0.365318	0.443003
Mst98Cb	FBgn0004171	0.388539	0.265378	0.410565	1.12687	0.13537	0.0578689	0.868478	2.01638	2.54342	0.934824	0.434943	0.268231	0.221277	0.493733	0.229804	3.62085	3.44315	3.09307	2.33667	0.982374	4.10364	5.70139	0.157304	0.115397	0.609355	0.752324
CG31709	FBgn0051709	0.383755	0.263629	0.415946	1.12585	0.136838	0.0583661	0.863793	1.98551	2.14416	1.21716	0.627789	0.150373	0.158217	0.553436	0.259942	3.62514	3.48158	3.04702	2.61433	0.645755	4.1179	5.64788	0.179873	0.262665	0.382716	0.869867
CG8564	FBgn0035776	0.345063	0.24901	0.462102	1.12223	0.111221	0.0496368	0.953813	1.96304	1.8368	1.15126	0.306013	0.150733	0.311464	0.426079	0.0944937	3.16562	3.40064	2.80784	2.15578	0.886995	3.77254	5.22971	0.18094	0.288891	0.338339	0.529854
CG33308	FBgn0250834	0.212638	0.189713	0.672359	1.12196	0.119698	0.0525073	0.921913	1.42795	1.31835	0.460064	0.0673709	0.0714205	0.0728681	0.319887	0.101465	2.33225	2.77795	1.8765	1.36063	0.481296	2.21729	3.83314	0.0792041	0.142741	0.311753	0.286429
CG17751	FBgn0038717	0.000624285	0.00297877	3.20462	1.12131	0.0674766	0.0343963	1.17085	0.491267	2.5369	3.01379	3.24231	1.48076	0.963525	1.46959	4.32664	3.91404	3.91627	3.89813	4.15616	4.12786	3.66796	3.38004	3.21881	2.42552	3.07959	3.25955
CG17717	FBgn0029877	0.00436155	0.0121827	2.36036	1.11901	0.0020022	0.0029243	2.69849	1.25528	0.556392	0.34657	0.655113	0.623669	0.600713	0.695637	1.36236	2.02112	1.53164	1.42892	0.991357	1.23421	1.66467	2.676	0.98324	0.927534	0.893964	0.869378
CG15510	FBgn0039707	0.123156	0.13422	0.909544	1.11837	0.0301763	0.0199836	1.52033	1.65741	0.57638	0.13592	0.345364	0.270979	0.224475	0.198273	0.592972	1.82105	1.99876	1.38153	0.651993	0.497416	2.11926	3.75001	0.160621	0.342618	0.20442	0.251276
CG31075	FBgn0051075	2.01e-06	4.99117e-05	5.6968	1.11807	0.000605246	0.00127227	3.21807	0.605767	5.73337	5.75722	5.71953	4.79302	5.03484	5.05774	7.08214	6.62862	6.85358	6.93803	6.73798	6.45286	6.31501	6.3056	6.4068	7.08388	6.80228	6.9367
CG13747	FBgn0033364	0.267336	0.21715	0.572943	1.11769	0.0662069	0.0339708	1.1791	1.94152	0.987679	0.989493	0.238694	0.156115	0.248426	0.369642	0.098379	2.58701	2.88354	2.29984	1.72758	0.632941	3.31916	4.53332	0.187943	0.137789	0.223562	0.449244
S-Lap8	FBgn0034132	0.442318	0.285303	0.354265	1.11742	0.162695	0.0667477	0.788626	2.09194	2.32909	1.68635	1.01714	0.303794	0.328161	0.746388	0.0879745	4.01624	4.28062	3.82864	2.99429	1.38409	4.8792	6.26052	0.168675	0.587584	0.773468	1.03539
CG1394	FBgn0030277	0.400481	0.26951	0.397418	1.1166	0.167533	0.0682741	0.7759	1.88183	2.71126	1.54051	0.717956	0.429936	0.398103	0.777659	0.313025	3.87539	4.13109	3.47839	2.86875	1.18511	4.29552	5.8519	0.467777	0.389064	0.63887	0.940522
Muc68D	FBgn0036203	0.0419302	0.0641513	1.37747	1.11574	0.902612	0.260141	0.0444989	0.0612476	7.16369	7.62425	7.23836	8.76462	7.28952	7.87134	9.53498	7.98036	7.85819	8.17355	8.77626	8.39176	6.92845	7.49398	7.78761	7.75275	8.81933	8.85079
CG11327	FBgn0031849	0.242503	0.205019	0.615283	1.11504	0.04563	0.0266362	1.34075	2.02244	0.927082	0.54307	0.410285	0.24295	0.218986	0.529608	0.189737	2.52213	2.51369	2.10508	1.50181	0.5517	3.27728	4.47178	0.198707	0.28139	0.387663	0.571744
CG17261	FBgn0031501	0.326713	0.24153	0.485834	1.11394	0.140341	0.0594979	0.852815	1.7201	2.12224	1.88469	1.30867	0.755057	0.944042	1.22731	1.15712	3.67343	3.82689	3.49757	2.94904	1.60742	4.29788	5.65752	0.520518	0.606362	1.27624	1.36867
CG42688	FBgn0261578	0.440624	0.284445	0.355932	1.11131	0.196682	0.077396	0.706235	1.90479	2.81779	1.54886	1.0645	0.189584	0.0882571	0.524302	0.128758	4.16499	4.47132	3.81615	3.18044	1.74406	4.5245	6.3088	0.312209	0.425901	0.457172	1.04148
CG3124	FBgn0034840	0.444549	0.286044	0.35208	1.11003	0.155867	0.0645459	0.807246	2.12609	2.72566	1.42537	0.62566	0.296216	0.263663	0.790617	0.0724807	3.76937	4.26493	3.95328	2.94391	1.43268	4.82836	6.10213	0.224457	0.309578	0.651993	0.987679
CG31802	FBgn0051802	0.259	0.213171	0.5867	1.10871	0.0425274	0.025356	1.37133	2.12297	0.742538	0.502841	0.592384	0.37635	0.196646	0.247512	0.118802	2.71835	2.32673	2.0562	1.49002	0.278128	3.46892	4.5232	0.214561	0.160485	0.288968	0.461537
CG33136	FBgn0053136	0.11534	0.128435	0.93802	1.10817	0.0862909	0.0409298	1.06404	1.21972	0.880847	0.42192	0.219227	0.0986869	0.102971	0.364219	0.494373	2.17052	2.1816	1.24725	1.04096	0.151557	1.86624	3.2052	0.109716	0.0899577	0.232292	0.135468
CG32457	FBgn0052457	0.247772	0.207676	0.605948	1.10731	0.0395533	0.0241545	1.40282	2.10446	2.57154	0.249841	0.957511	0.105822	0.250017	0.246472	0.179011	3.85841	3.0634	1.48047	1.71138	1.23829	3.02498	4.98896	2.07832	0.211891	0.494234	0.0769493
CG12699	FBgn0046294	0.544053	0.323233	0.264359	1.10694	0.290213	0.106536	0.537283	1.96155	4.00054	2.71591	1.3493	0.554872	0.365832	1.55651	0.457521	5.35869	5.57035	4.97729	4.22196	2.51747	6.23104	7.6211	0.0982456	1.12269	1.41477	1.86474
CG9360	FBgn0030332	6.11e-05	0.000535654	4.21396	1.10654	0.000826322	0.00157866	3.08285	0.814737	5.56886	5.87472	5.83732	5.17221	5.36456	5.28454	6.56575	6.94871	7.08607	6.74965	6.49096	6.35688	6.53663	6.91955	6.26894	6.64156	6.20286	6.40264
CG30192	FBgn0050192	0.193301	0.179286	0.713766	1.10493	0.0780251	0.0381221	1.10777	1.54471	1.0391	0.545441	0.364247	0.19306	0.206914	0.262153	0.339557	2.46827	2.45576	1.49251	1.19282	0.243354	2.30278	4.05088	0.229258	0.172153	0.14207	0.62969
sinah	FBgn0259794	0.323732	0.240322	0.489814	1.10414	0.100544	0.0458917	0.997644	1.90882	1.72702	0.735766	0.456282	0.291463	0.0429487	0.408467	0.0553292	3.04735	3.1288	2.56626	1.77573	0.855869	3.46409	4.99728	0.184181	0.299441	0.218877	0.569416
CG14223	FBgn0031053	4.14e-05	0.000404854	4.383	1.10361	0.00607792	0.00633745	2.21625	-0.584984	1.53269	1.74076	1.60695	1.46603	1.58458	1.45506	2.64654	2.76881	2.77587	2.56139	2.43216	2.36064	0.865011	0.660611	1.59983	1.31331	1.31121	1.40778
lox2	FBgn0034660	1.27e-05	0.000172591	4.8962	1.10086	0.000329632	0.00082935	3.48197	0.770899	3.04596	2.86875	2.80091	1.28063	1.36867	1.58012	3.85664	3.92454	4.23702	2.59871	2.53597	2.45037	3.65163	3.38764	3.98905	2.68775	2.29984	2.57744
CG34170	FBgn0085199	0.130009	0.139096	0.886027	1.10012	0.0567788	0.0307905	1.24581	1.42635	0.705966	0.44976	0.238239	0.233368	0.248124	0.168938	0.392411	2.0534	2.24852	1.26336	1.28535	0.534642	1.78098	3.62192	0.270107	0.209376	0.302727	0.51813
Pen	FBgn0011823	0.345203	0.24901	0.461925	1.0995	0.408694	0.140425	0.388602	1.85088	2.89763	2.17069	1.46275	1.42045	1.3673	1.62427	1.65602	3.96804	4.20551	3.93634	3.17353	1.95046	4.88315	6.26512	0.935435	1.71548	1.43705	2.06373
CG31178	FBgn0064912	0.321818	0.239726	0.49239	1.09855	0.0956171	0.0442051	1.01946	1.92274	1.91137	1.01203	0.898676	0.725682	0.515787	0.814309	0.415335	3.27824	3.42416	2.98784	2.14715	0.914159	3.84937	5.21921	0.52173	0.777257	0.77018	1.11107
CG30278	FBgn0050278	0.264491	0.215688	0.577589	1.09759	0.109488	0.0490081	0.960633	1.62087	1.30089	0.62672	0.590219	0.236136	0.0714551	0.222524	0.277893	2.74652	2.78618	2.32508	1.6669	0.511473	2.92282	4.37968	0.077922	0.0652885	0.508637	0.240555
CG5089	FBgn0034144	0.46844	0.294096	0.329346	1.0974	0.191536	0.0757551	0.71775	2.0286	3.2217	1.89684	1.20227	0.774153	0.894544	1.12761	0.479969	4.5154	4.61764	4.24183	3.68968	1.69177	5.27917	6.68979	0.437663	0.586131	0.986181	1.29574
CG18810	FBgn0042133	0.14821	0.151527	0.829122	1.09733	0.0268471	0.0183855	1.5711	1.79028	0.574215	0.220145	0.388014	0.791522	0.627491	0.711734	0.36293	1.98403	2.12739	1.6147	0.968674	0.460064	2.26293	3.92883	0.361454	0.513716	0.783704	0.672115
CG32652	FBgn0052652	0.460078	0.291111	0.337169	1.09668	0.174454	0.0705638	0.758319	2.07431	3.00583	1.64577	1.05288	0.175945	0.447457	0.408335	0.114193	4.35712	4.5232	3.9899	3.4439	1.78263	4.98068	6.48777	0.458946	0.445989	0.885369	1.21297
CG4594	FBgn0032161	0.000169027	0.00111777	3.77204	1.09542	0.00143568	0.0023423	2.84294	0.839783	2.1746	3.00605	2.57744	2.76237	2.8485	3.00676	3.80139	3.77113	3.47182	3.87136	3.9305	4.05294	3.40917	3.10175	3.76653	3.74035	4.00098	4.09852
CG15711	FBgn0034122	0.0330012	0.0541661	1.48147	1.09402	0.00325433	0.00409491	2.48754	1.66338	0.613279	0.305094	0.083557	0.0879384	0.0922723	0.266081	0.92913	1.62871	1.72615	1.13336	1.35182	0.468288	1.87876	3.15923	0.954075	1.04009	0.802014	1.55651
CG4377	FBgn0034664	0.0152846	0.0307955	1.81575	1.09376	0.0369956	0.0230885	1.43185	0.907848	7.02338	6.53291	6.72233	6.3694	5.83006	5.96738	7.40807	8.20653	7.9453	8.06419	7.95625	8.91299	7.39439	7.60211	8.00566	7.12331	8.43515	8.62976
CG12309	FBgn0033542	0.0888668	0.107548	1.05126	1.09306	0.0132289	0.0110972	1.87848	1.71448	0.640626	1.06912	1.11494	0.912843	0.99995	0.925145	1.18175	2.52285	2.39924	1.77645	1.50014	0.838887	2.93298	4.00634	1.0288	1.00112	0.866052	1.07272
Grx-1	FBgn0034658	0.299676	0.230369	0.523348	1.09251	0.084246	0.0402118	1.07445	1.89723	1.79197	0.609355	0.374743	0.124136	0.131709	0.570569	0.218145	2.78432	3.05111	2.36201	1.7445	0.623669	3.38004	4.78739	0.300329	0.32984	0.479823	0.516953
CG4691	FBgn0028870	0.399019	0.268781	0.399006	1.09095	0.130447	0.0561742	0.884566	2.02534	2.15988	1.20175	0.880056	0.19306	0.324834	0.42291	0.0751045	3.5975	3.84193	2.98037	2.57223	1.16718	4.39515	5.6933	0.229258	0.276931	0.46365	0.738145
CG8526	FBgn0037759	0.243823	0.205732	0.612925	1.0882	0.050458	0.0285041	1.29707	1.92986	1.27992	0.544419	0.250881	0.627491	0.390105	0.566403	0.154663	2.7042	2.48095	2.03657	1.62574	0.838141	3.03797	4.48007	0.346772	0.609355	0.799483	0.968184
CG1999	FBgn0029947	0.278135	0.221928	0.555744	1.08711	0.0609757	0.0322801	1.21484	1.97835	1.18054	0.609355	0.37858	0.0584998	0.0599504	0.514824	0.0816939	2.69083	2.65728	2.17355	1.78	0.680857	3.17353	4.68867	0.241328	0.183543	0.345042	0.631136
CG10919	FBgn0037514	0.191379	0.178327	0.718106	1.0864	0.0358619	0.0226318	1.44537	1.854	0.523253	0.479676	0.306802	0.0920625	0.0966545	0.276931	0.143188	2.26158	2.16415	1.62792	1.5124	0.524302	2.57098	4.05879	0.241952	0.265386	0.218145	0.466204
CG14540	FBgn0039398	0.318368	0.238298	0.497071	1.08605	0.0894841	0.0420113	1.04825	1.9272	1.57143	0.846751	0.514528	0.107676	0.0724807	0.404263	0.280664	2.77587	3.13432	2.58831	1.94095	0.572611	3.57638	4.94227	0.19566	0.27744	0.285942	0.544724
Fhos	FBgn0261259	2.03e-05	0.000244365	4.6925	1.08455	4.72e-06	4.03367e-05	5.32606	1.25583	7.26829	6.96368	7.2953	6.49461	6.13815	6.19172	7.93716	8.48437	8.35939	6.41494	6.35653	6.00401	8.55739	8.37694	8.36042	5.89174	5.94711	5.69546
CG43922	FBgn0264543	0.137282	0.144063	0.862386	1.0845	0.0402057	0.0244255	1.39571	1.56634	0.738752	0.557808	0.200055	0.198886	0.212287	0.39729	0.529323	2.32604	1.89475	1.73639	0.959865	0.367959	2.15242	3.66147	0.381745	0.322826	0.263214	0.641706
CG31007	FBgn0051007	0.333141	0.244513	0.477372	1.08255	0.132679	0.0569389	0.877198	1.73171	2.21432	0.699383	0.380869	0.291763	0.315096	0.335614	0.144924	3.21342	3.18389	2.55105	2.0536	0.833193	3.42349	4.82379	0.242429	0.335005	0.486479	0.301343
ran-like	FBgn0036497	0.240379	0.203904	0.619103	1.0824	0.0395528	0.0241545	1.40282	2.02323	0.662378	0.745303	0.139297	0.0644094	0.0655053	0.157934	0.0904186	2.14661	2.55714	1.56944	1.43402	0.438747	3.04171	4.4005	0.174468	0.127593	0.210187	0.384264
CG11106	FBgn0030280	0.304542	0.232592	0.516353	1.08237	0.0952871	0.0441378	1.02097	1.82712	1.4713	0.988488	0.503811	0.127305	0.135963	0.583099	0.225543	2.72184	3.26332	2.34716	1.7436	0.905852	3.51429	4.7763	0.154353	0.416313	0.534835	0.394074
CG7251	FBgn0031723	0.262192	0.214689	0.581381	1.08136	0.0647062	0.0335863	1.18905	1.86918	0.885369	0.573021	0.307171	0.184902	0.0515326	0.0439814	0.0698886	2.20145	2.73832	2.50622	1.54411	0.438621	2.7662	4.38765	0.219252	0.16472	0.218564	0.512354
CG2113	FBgn0035384	0.247297	0.207503	0.606781	1.07985	0.0779888	0.0381173	1.10797	1.71097	1.71898	0.627491	0.242429	0.0709381	0.37188	0.538175	0.279229	2.85229	2.69693	2.05039	1.77402	0.843302	2.95449	4.33482	0.432506	0.213274	0.176755	0.601207
Cyp6g2	FBgn0033696	0.104212	0.119996	0.982082	1.07969	0.377529	0.131655	0.42305	0.562804	1.62943	1.79275	0.983031	2.12739	2.22556	2.67905	4.49962	1.27992	1.86474	1.67485	1.70444	1.92385	1.9486	1.73149	2.41353	2.94857	3.05441	3.34959
CG9010	FBgn0034173	0.28284	0.224139	0.548459	1.07965	0.0734017	0.0365219	1.13429	1.88376	1.31983	0.574282	0.439906	0.111069	0.0516543	0.216028	0.190167	2.614	2.76881	2.1886	1.61661	0.525702	3.26006	4.59649	0.128734	0.306361	0.387876	0.290119
CG14718	FBgn0037939	0.347861	0.249919	0.458594	1.07957	0.0837071	0.0400265	1.07724	2.08417	1.73212	0.799307	0.440171	0.0949901	0.14207	0.284554	0.150773	2.89334	3.16618	2.78585	2.02908	0.7634	3.97074	5.09282	0.160547	0.317894	0.480337	0.634858
Ppi1	FBgn0051025	0.392653	0.266725	0.405991	1.07903	0.0958604	0.0442576	1.01836	2.19905	2.17788	1.14125	0.667762	0.394487	0.361072	0.60661	0.159115	3.34817	3.7167	3.26467	2.48951	1.09775	4.3382	5.79939	0.446461	0.680987	0.960054	0.941977
CG3345	FBgn0031240	0.234445	0.201208	0.629959	1.07622	0.0451654	0.0264509	1.34519	1.92169	1.10122	0.705966	0.394372	0.419019	0.338339	0.63455	0.263836	2.62976	2.53663	2.24488	1.72527	0.770625	3.04411	4.46711	0.455401	0.417415	0.558243	0.619937
CG6888	FBgn0036490	0.159703	0.158935	0.796687	1.07619	0.0293058	0.0195016	1.53305	1.77577	0.285942	0.386646	0.37276	0.0897353	0.0945977	0.142786	0.349665	1.6563	2.26796	1.51086	0.85364	0.304205	2.66013	3.61161	0.100915	0.179011	0.378699	0.183085
CG42820	FBgn0262002	0.184954	0.17515	0.732936	1.07567	0.031034	0.0203917	1.50816	1.8678	0.320646	0.368051	0.0796831	0.0849176	0.05245	0.292438	0.0711217	1.84887	2.0754	1.636	1.04288	0.304652	2.44574	3.83118	0.0948702	0.167542	0.184902	0.311753
CG8565	FBgn0030697	0.27514	0.220512	0.560446	1.07503	0.0521356	0.0290856	1.28287	2.02641	0.538175	0.672115	0.507767	0.140537	0.189183	0.565583	0.113831	2.39437	2.43495	2.12201	1.68447	0.469682	3.18334	4.56152	0.0524247	0.0959857	0.299479	0.568448
CG5048	FBgn0036437	0.234667	0.201223	0.629548	1.07432	0.0631745	0.0330361	1.19946	1.75771	1.67708	1.79606	1.54872	0.807939	1.11972	1.16093	1.45943	3.33862	3.44677	3.00937	2.25963	0.880847	3.96071	5.1557	1.17858	1.05466	1.01866	1.12407
CG12541	FBgn0029930	8.23e-05	0.000662712	4.0846	1.07406	0.247346	0.0933171	0.606695	0.224467	2.22319	2.3352	2.3564	2.03202	1.8778	1.8909	3.65219	3.26389	3.22087	2.17788	2.42265	2.50948	2.69453	2.02664	2.86701	2.15621	2.1115	2.31299
CG14974	FBgn0040694	0.182884	0.173826	0.737824	1.07368	0.0919839	0.0429053	1.03629	1.3909	1.24451	0.312482	0.303211	0.28708	0.308635	0.212866	0.258235	2.38496	2.43803	1.88145	1.61572	0.674629	1.93982	3.76247	0.33061	0.13125	0.111698	0.0993544
LysD	FBgn0004427	0.0245018	0.0436055	1.6108	1.07196	0.0208557	0.0153514	1.68078	1.10838	5.07161	6.73611	5.57417	1.24048	0.899636	2.40604	7.12829	6.5561	6.91339	6.21196	5.99717	5.97834	6.65087	7.16728	6.88889	6.17337	6.57159	6.49376
Tpl94D	FBgn0051281	0.298021	0.229571	0.525753	1.07063	0.0693342	0.0350312	1.15905	1.96278	1.26416	0.643217	0.408335	0.146949	0.156037	0.426215	0.0527255	2.84091	2.63396	2.23829	1.57143	0.628373	3.33266	4.69427	0.177116	0.222234	0.264394	0.663678
CG5217	FBgn0038694	0.337234	0.246108	0.472069	1.07021	0.0918396	0.0428589	1.03697	1.96162	1.41124	0.957511	0.52503	0.286768	0.157636	0.257618	0.0935207	2.92157	3.08931	2.55146	2.01593	0.492413	3.62085	4.97927	0.178538	0.309905	0.290949	0.525436
CG6262	FBgn0034121	0.281393	0.223304	0.550687	1.06975	0.0774247	0.037932	1.11112	1.83153	1.2087	0.384064	0.313421	0.113361	0.0335338	0.191389	0.0420847	2.39767	2.67567	2.28455	1.69518	0.727184	2.90395	4.48071	0.0161279	0.185941	0.243423	0.29619
S-Lap1	FBgn0035915	0.541214	0.322159	0.266631	1.06965	0.242628	0.0918993	0.615059	2.09039	3.83596	2.57744	1.54411	0.737684	0.873954	1.48641	0.303041	5.2851	5.57832	5.11086	4.42902	2.20281	6.15676	7.47145	0.600456	0.945081	1.35366	1.73639
CG12689	FBgn0029952	0.225316	0.196467	0.647208	1.06843	0.0340626	0.0218762	1.46772	1.99859	0.652367	0.376322	0.365262	0.0871749	0.20807	0.262887	0.132727	2.16747	2.29904	1.90057	1.15881	0.244081	2.74129	4.32968	0.318746	0.172676	0.207751	0.35531
CG11373	FBgn0040679	0.261492	0.214532	0.582542	1.06785	0.0513227	0.0287831	1.28969	1.96125	1.45031	0.432953	0.565583	0.220793	0.401584	0.443281	0.377219	2.47878	2.7964	2.16843	2.14305	1.03349	3.10836	4.81026	0.413981	0.200371	0.290459	0.38983
ymp	FBgn0261287	0.223713	0.195511	0.650309	1.06628	0.0450502	0.0264051	1.3463	1.859	1.41477	0.746126	0.609355	0.486479	0.521325	0.469758	0.649296	2.69381	2.62597	2.08225	1.83721	0.764343	3.2674	4.53688	0.542966	0.424671	0.497191	0.729991
TrxT	FBgn0029752	0.307946	0.234062	0.511525	1.06358	0.0683895	0.0347127	1.16501	2.00001	1.78728	1.38101	0.619937	2.26158	2.36136	2.44253	0.497289	3.16802	3.31366	2.856	2.42684	1.51025	4.05981	5.12833	0.600112	1.26416	1.49251	1.61266
CG42733	FBgn0261686	0.217651	0.192268	0.662239	1.06288	0.0335859	0.0216194	1.47384	1.95968	0.629925	0.623669	0.521055	0.104373	0.24774	0.0849176	0.175432	2.32039	2.46747	1.90246	1.78181	0.753202	3.0918	4.19931	0.362575	0.0967838	0.172874	0.517261
CG43277	FBgn0262966	0.116498	0.12946	0.933682	1.06227	0.0524762	0.0291962	1.28004	1.35122	1.50536	0.752977	0.839152	0.52503	0.195095	0.649523	1.10569	2.48143	2.69717	1.89684	1.22809	0.692996	2.70049	3.6869	0.763748	0.559053	0.615985	0.495648
CG12307	FBgn0032370	0.322846	0.240088	0.491005	1.06196	0.14108	0.0597142	0.850535	1.62292	1.84215	0.65619	0.609355	0.367484	0.102089	0.29189	0.157377	3.09337	3.04283	2.48612	1.56274	0.754751	3.17713	4.69029	0.10902	0.192612	0.230732	0.435314
eIF4E-4	FBgn0035709	0.350218	0.250725	0.455662	1.06031	0.107702	0.0483897	0.967776	1.8963	1.92261	0.847953	0.0599003	0.136397	0.229687	0.103524	0.087534	2.88998	3.03388	2.69227	1.92185	0.5068	3.52579	4.82595	0.16762	0.122044	0.370141	0.629654
CG31949	FBgn0051949	0.21312	0.189827	0.671376	1.05994	0.0791613	0.0385134	1.10149	1.54642	0.503811	0.72013	0.514632	0.388813	0.362125	0.523363	0.128331	2.28636	2.50371	1.66478	0.91389	0.288968	2.4193	3.8628	0.0957415	0.248114	0.302252	0.479896
CG15177	FBgn0037461	0.1724	0.16746	0.763463	1.05794	0.0258062	0.0178784	1.58828	1.8539	0.545441	0.479551	0.290397	0.141381	0.232938	0.156631	0.368443	2.07168	2.04908	1.71888	1.20502	0.234953	2.70823	3.8482	0.320646	0.25398	0.32541	0.300748
CG10317	FBgn0038423	0.240803	0.204018	0.618338	1.05726	0.0670219	0.0342496	1.17378	1.72521	1.5079	0.662159	0.307786	0.346534	0.0687459	0.305953	0.476445	2.66304	2.51013	1.87487	1.68267	0.498246	2.99526	4.32208	0.336125	0.13378	0.256771	0.512958
CG15353	FBgn0040718	1.26e-05	0.000172591	4.89963	1.05724	0.00297319	0.00383865	2.52678	0.553162	4.49988	4.60947	4.34979	3.02685	2.82342	3.01917	5.80053	5.49151	5.33882	4.53134	4.24489	4.09251	4.87597	4.93078	5.31188	4.38133	4.55731	4.50987
Cyp6d5	FBgn0038194	0.000459929	0.00237882	3.33731	1.05591	0.0011799	0.00202996	2.92815	0.936026	7.35981	7.25189	7.41951	7.28952	6.86733	7.03185	7.79549	8.73746	8.666	8.41435	8.41759	8.56102	8.26067	8.06884	8.50978	8.27351	8.38749	8.73746
CG5762	FBgn0039190	0.406383	0.271638	0.391064	1.05337	0.133659	0.0572568	0.874002	1.9693	1.84754	1.26336	0.652227	0.159377	0.171011	0.580388	0.100078	3.26415	3.55903	3.15739	2.57831	0.878314	4.07108	5.52171	0.0782395	0.325759	0.402232	0.72759
CG12470	FBgn0040371	0.311373	0.235588	0.506719	1.05231	0.0627817	0.0329067	1.20217	2.04191	1.9406	0.947232	1.03623	0.821022	0.540406	0.914787	0.589047	3.20054	3.29141	2.8448	2.37782	1.17751	4.00355	5.29329	0.752971	0.693484	0.743049	0.52503
CG34456	FBgn0085485	0.00191365	0.00666875	2.71814	1.05202	0.000157531	0.000481975	3.80263	1.43936	1.08148	1.79163	1.69518	1.46502	1.37832	1.36543	2.55434	2.69734	2.47267	2.73346	2.87639	2.78481	3.01046	2.64654	3.22938	2.99821	3.61956	4.23259
CG4576	FBgn0038366	0.044454	0.0669118	1.35209	1.05183	0.601697	0.190888	0.220622	0.251249	0.537555	0.632023	0.596787	1.43977	1.40677	1.40918	3.00622	0.970755	0.944895	1.11728	1.13336	1.20539	0.391595	0.501894	1.62662	1.01082	1.4017	1.65797
CG9254	FBgn0028513	0.328125	0.241954	0.483961	1.05125	0.0738716	0.0367175	1.13152	2.01932	1.27596	1.02625	0.432793	0.0800284	0.12871	0.433219	0.209987	2.64695	3.03181	2.49524	1.77813	0.764789	3.6972	4.95267	0.143089	0.194618	0.310667	0.513716
CG16885	FBgn0032538	0.000187593	0.00121382	3.72678	1.04915	0.00187709	0.00281312	2.72651	0.784481	1.86428	1.85398	2.05683	0.999553	1.44518	1.06027	2.72304	3.02051	3.179	1.96197	1.95453	1.96753	2.72945	2.23481	3.16427	1.7577	1.94431	1.93383
CG15200	FBgn0030278	0.322898	0.240088	0.490935	1.04203	0.06851	0.034738	1.16425	2.02273	1.88237	0.496666	0.554563	0.257744	0.130054	0.769153	0.211914	2.76999	3.0778	2.76395	2.0588	1.07349	3.63107	4.90691	0.463794	0.325388	0.413431	0.689626
CG31245	FBgn0051245	0.161225	0.160173	0.792568	1.04045	0.0290601	0.0193606	1.5367	1.72679	0.568882	0.240585	0.419578	0.151779	0.161931	0.164824	0.382892	1.9037	2.06379	1.92534	0.93102	0.416908	2.35886	3.71444	0.336125	0.13378	0.113398	0.231486
snoRNA:CG31191-a	FBgn0263460	0.0289533	0.0493429	1.5383	1.03987	0.667984	0.206821	0.175234	-0.184352	0.757673	1.75493	1.02764	1.57924	1.17648	0.838887	3.07753	2.15242	1.42991	1.42697	2.20563	1.79318	0.873108	0.556424	1.55766	1.40663	1.59645	1.97282
CG3494	FBgn0035008	0.26577	0.216211	0.575494	1.03925	0.0493742	0.028102	1.3065	1.9461	1.02064	0.777659	0.0635717	0.346695	0.0688962	0.30656	0.0954789	2.11653	2.76761	1.95453	1.39964	0.624481	3.05111	4.3847	0.264375	0.0632239	0.342269	0.533799
CG34160	FBgn0250826	0.305707	0.233018	0.514695	1.03797	0.122141	0.0534063	0.913139	1.61357	2.05223	0.849321	0.561802	0.168999	0.528463	0.705966	0.499977	3.18605	2.89124	2.19106	2.28455	0.784384	3.25773	4.69247	0.353879	0.373495	0.557503	0.474261
w-cup	FBgn0032269	0.478575	0.298306	0.32005	1.03734	0.158777	0.0654677	0.799212	2.13122	2.99204	1.50138	0.970062	0.15745	0.285788	0.291555	0.0992676	4.34443	4.1318	3.6209	3.19018	1.50842	5.05549	6.39943	0.402232	0.273593	0.456282	0.963811
CG14391	FBgn0038078	0.12717	0.137298	0.895615	1.03581	0.0411887	0.0248311	1.38522	1.44514	0.639251	0.456849	0.243505	0.485938	0.114543	0.248114	0.401217	2.25855	1.78728	1.3717	1.15991	0.234409	1.98618	3.32297	0.365872	0.0991751	0.381084	0.411476
Obp57a	FBgn0043535	2.19e-07	1.33165e-05	6.65956	1.03523	0.000464416	0.00106768	3.33309	0.470811	5.23745	5.16179	5.23829	5.15778	5.16805	4.96288	6.26974	6.33404	6.13942	6.16078	6.31501	6.09472	5.63098	5.50558	5.91338	5.66254	5.50484	5.61418
CG31008	FBgn0051008	0.224042	0.19569	0.649671	1.03457	0.0823088	0.0396218	1.08455	1.52991	1.255	0.62021	0.27842	0.363783	0.141063	0.375795	0.231892	2.44182	2.58363	1.87017	1.66591	0.551182	2.49041	3.94413	0.308831	0.11672	0.102611	0.250085
CG15034	FBgn0029946	0.286779	0.225303	0.542453	1.03405	0.0828057	0.0397647	1.08194	1.75538	1.40982	0.532457	0.360315	0.186647	0.0874988	0.133455	0.126173	2.5161	2.76246	2.26158	1.47964	0.495648	2.96698	4.3795	0.222234	0.166614	0.365318	0.623669
sowi	FBgn0037460	0.337916	0.24634	0.471191	1.03297	0.137062	0.0584356	0.863083	1.64898	1.4586	1.47378	0.348155	0.0811497	0.195095	0.511473	0.312141	2.9372	3.13012	2.473	2.1315	0.658243	3.40452	4.73385	0.0891221	0.23782	0.340337	0.634858
Cpr60D	FBgn0050163	3.72e-07	1.68033e-05	6.42946	1.03263	2.04e-05	0.000107877	4.69037	0.69964	2.96936	3.26293	3.30694	2.83573	2.85825	2.55105	4.19838	4.19582	4.24292	3.62433	3.91883	3.61423	3.91276	3.85113	3.87425	4.00924	3.91928	3.96024
CG31141	FBgn0051141	0.196603	0.181201	0.70641	1.03233	0.0751527	0.0371562	1.12406	1.471	0.755144	0.319429	0.0636821	0.152698	0.16268	0.165641	0.0957415	2.00178	2.13772	1.45298	1.07907	0.460401	1.69518	3.78111	0.0749519	0.134373	0.113831	0.188053
CG13110	FBgn0032111	0.254273	0.210909	0.5947	1.02965	0.0846607	0.0403213	1.07232	1.61627	0.90815	1.01055	0.390357	0.132727	0.141983	0.101474	0.23493	2.57098	2.59211	1.60441	1.32949	0.360696	2.76237	4.23499	0.16051	0.117601	0.432793	0.251072
S-Lap4	FBgn0052064	0.524617	0.315679	0.280158	1.02962	0.204253	0.07985	0.689832	2.10939	3.3295	1.76405	1.33916	0.275452	0.229322	0.724752	0.15392	4.57782	4.78985	4.45291	3.69351	1.84022	5.4471	6.99806	0.31573	0.507533	0.877323	1.29076
CG7755	FBgn0034105	0.228702	0.198373	0.64073	1.02718	0.0830209	0.039831	1.08081	1.53127	0.976219	0.382892	0.167694	0.100587	0.0479254	0.0810593	0.163391	2.176	2.26896	2.11588	1.52926	0.57435	2.0562	3.95128	0.113128	0.0920377	0.262665	0.389064
CG13477	FBgn0036438	0.348088	0.249928	0.458311	1.0259	0.103202	0.0467261	0.986312	1.85291	1.18303	1.29135	0.592972	0.331215	0.114498	0.31723	0.183085	2.92584	3.03613	2.6607	1.95269	0.625781	3.66263	4.8388	0.124636	0.0990353	0.308831	0.649523
CG2291	FBgn0033279	0.275149	0.220512	0.560432	1.02573	0.0837727	0.0400445	1.0769	1.69154	1.27848	0.36293	0.353493	0.0831134	0.0854943	0.248697	0.120237	2.6688	2.28307	1.98679	1.0893	0.434562	2.71444	4.26383	0.0912639	0.391595	0.247557	0.412114
CG42393	FBgn0259739	0.41126	0.273278	0.385884	1.02352	0.158163	0.0652989	0.800895	1.80952	2.27515	1.46774	0.588908	0.196882	0.271288	0.669934	0.204345	3.55604	3.64196	3.17281	2.37321	0.738145	4.01681	5.396	0.347548	0.379256	0.406853	0.744372
CG17819	FBgn0038915	0.128721	0.138241	0.890351	1.02323	0.0352421	0.0223735	1.45294	1.4879	0.104322	0.438575	0.339821	0.317305	0.107604	0.304652	0.168877	2.08351	1.7	1.00817	1.05343	0.158112	1.86474	3.21811	0.263561	0.204211	0.477538	0.512354
CG4434	FBgn0039071	0.281504	0.223304	0.550515	1.01714	0.0450989	0.0264228	1.34583	2.01708	0.930176	0.705739	0.248562	0.204211	0.177116	0.387966	0.105471	2.38654	2.44388	2.1712	1.50065	0.52173	3.23731	4.45511	0.243302	0.251518	0.233368	0.506879
CG8813	FBgn0031476	0.230829	0.199488	0.63671	1.01438	0.0767775	0.0377114	1.11477	1.55579	2.16467	1.6563	1.20539	1.78029	1.34505	1.87017	1.52026	3.2923	3.25695	2.7581	2.37734	1.68532	3.6269	5.04349	1.02334	1.19282	1.4859	1.27003
CG17237	FBgn0031410	0.313228	0.236447	0.504139	1.01335	0.0699944	0.0352913	1.15494	1.91468	1.50098	0.266949	0.695383	0.0774018	0.0798122	0.287392	0.110576	2.7589	2.63387	2.2684	1.73346	0.635775	3.25938	4.65866	0.289302	0.15176	0.238282	0.481074
CG33293	FBgn0053293	0.11235	0.12624	0.949427	1.01319	0.0127088	0.0107667	1.8959	1.73007	2.11887	2.27804	2.09496	2.5635	2.49834	2.47085	2.42402	3.304	3.80342	3.07517	3.09277	2.26796	4.06707	5.34615	2.26886	2.45609	2.1388	2.4744
CG7214	FBgn0031940	0.0154407	0.0310047	1.81133	1.01298	0.880018	0.255476	0.0555084	-0.0553757	1.62257	2.48612	2.14795	0.365406	1.11559	0.595826	2.48852	3.09734	3.70971	1.39232	1.47378	1.26793	1.97209	1.41426	2.70417	0.880847	0.939459	1.15991
CG34457	FBgn0085486	0.0598599	0.0816528	1.22286	1.01252	0.00300404	0.00386464	2.52229	1.80585	0.632822	0.52709	0.591871	0.369704	0.365872	0.435435	0.901544	1.78194	2.10584	1.36643	1.10663	0.49288	2.60563	3.50289	1.06082	0.975778	0.75027	0.744372
CG9632	FBgn0038377	0.198435	0.181976	0.702382	1.01226	0.047358	0.0273282	1.32461	1.64268	1.43631	0.689449	0.609355	0.500835	0.496143	0.768552	0.574633	2.59349	2.60377	2.03481	1.53164	1.15657	2.94741	4.10282	0.612918	0.457521	0.696439	0.745098
CG18335	FBgn0033610	0.17576	0.169757	0.75508	1.01152	0.0212416	0.0155438	1.67281	1.86183	0.626017	0.821184	0.37572	0.22711	0.243598	0.531662	0.572816	1.89969	2.38496	1.93763	1.06082	0.940102	2.79381	4.06945	0.545142	0.680909	0.733948	0.857416
CG15739	FBgn0030347	9.69e-05	0.000746076	4.01368	1.01137	0.0133835	0.0111538	1.87343	0.512822	3.48575	3.36328	3.61189	3.40503	3.10883	3.23532	4.50712	4.43257	4.55533	4.80895	4.64194	5.15226	3.7056	4.02093	4.27286	4.43909	4.83083	5.03624
CR32690	FBgn0052690	0.41778	0.275707	0.379052	1.01105	0.158679	0.0654367	0.799481	1.81091	1.6313	1.44735	0.931938	0.081983	0.351975	0.654051	0.118106	3.47648	3.44914	3.07035	2.0407	0.516953	4.07425	5.27917	0.089896	0.492144	0.437895	0.998634
Dbi	FBgn0010387	0.00027994	0.00163713	3.55294	1.01097	0.049204	0.0280329	1.308	0.437133	8.06265	8.14835	8.26067	8.02929	7.47393	7.8628	9.72811	8.78098	8.9955	9.14259	8.89049	9.09329	8.63192	8.55739	8.59376	8.90811	8.98778	8.9955
CG32148	FBgn0047338	0.328674	0.242135	0.483235	1.01029	0.150783	0.0629032	0.821648	1.52282	1.95697	0.818085	1.00919	0.30396	0.174448	0.427556	0.492907	3.06442	3.25779	2.47746	1.96221	1.21142	3.30057	4.85485	0.197284	0.279229	0.483656	0.773935
CG13177	FBgn0040759	7.41e-05	0.000617655	4.13018	1.00983	0.164559	0.0673392	0.783678	0.25397	5.30607	4.95486	4.82206	3.53121	3.83596	4.00924	5.88645	5.86221	6.36382	4.7477	4.73898	4.59608	5.29503	5.09206	5.45781	3.89003	3.70091	4.00054
CG13243	FBgn0028903	0.214356	0.190585	0.668864	1.0089	0.0399157	0.0243137	1.39886	1.77285	0.858391	0.35758	0.0404731	0.0414537	0.0424425	0.213498	0.0542939	1.96753	2.26132	1.49196	1.13267	0.394372	2.32823	3.96111	0.285637	0.0838774	0.186282	0.269269
comm2	FBgn0041160	0.000318083	0.00180027	3.49746	1.00864	0.00132711	0.00220527	2.87709	0.84163	3.89226	3.75001	3.9111	4.26431	3.7001	4.11919	5.23134	4.80089	4.54706	4.91197	4.57718	4.88615	4.82479	4.55727	4.69619	5.00544	4.48485	5.06962
CG14835	FBgn0035782	0.238542	0.202973	0.622435	1.0084	0.0506373	0.0285598	1.29553	1.76558	1.18697	0.344591	0.612918	0.563041	0.488157	0.378115	0.163072	2.30611	2.70049	1.89475	1.54605	0.804848	2.67787	4.2633	0.500042	0.472986	0.668133	0.62644
tomboy40	FBgn0033074	0.218686	0.192872	0.660179	1.00738	0.0436659	0.025879	1.35986	1.7495	1.00919	0.793721	0.695637	0.606879	0.635775	0.494022	0.609355	2.36029	2.55105	2.23047	1.81005	0.811116	2.92211	4.3126	0.512354	0.74345	0.612918	0.864524
CG6527	FBgn0036085	0.289153	0.226156	0.538872	1.00573	0.0680168	0.0345857	1.16738	1.81855	1.28772	0.48556	0.46365	0.0782726	0.186672	0.404968	0.30219	2.30085	2.65107	2.24746	1.69188	0.417622	3.07053	4.41399	0.20807	0.0718508	0.506879	0.160677
CG43121	FBgn0262581	0.249746	0.20854	0.602501	1.00531	0.0562041	0.0305655	1.25023	1.75645	1.38569	1.39608	0.60058	0.479969	0.614675	0.868819	0.761043	2.73961	2.89763	2.42265	1.85148	0.663678	3.45924	4.44942	0.743049	0.497416	0.989493	0.858717
CG6652	FBgn0036687	0.240491	0.203936	0.618901	1.00467	0.0286376	0.0191802	1.54306	2.02254	0.592068	0.58299	0.595826	0.283249	0.408589	0.471891	0.348007	2.19212	2.24477	2.13365	1.61727	0.368122	3.12562	4.29249	0.420386	0.451912	0.623669	0.642954
CG31907	FBgn0051907	0.195041	0.18038	0.709874	1.00443	0.0229645	0.0164499	1.63894	1.90735	0.494675	0.727184	0.835786	0.52184	0.511473	0.698748	0.471534	2.5587	2.0407	1.91594	1.06417	0.802767	3.13019	4.04757	0.601941	0.467052	0.520518	0.965641
per	FBgn0003068	2.63e-05	0.000286752	4.58004	1.0042	0.0103332	0.0092809	1.98577	0.463762	3.2052	3.10923	2.90821	3.83278	3.46331	3.39262	4.15602	4.06781	4.01142	4.415	4.251	4.23725	3.47545	3.23834	3.90013	4.12903	4.02655	4.12964
CG31538	FBgn0051538	0.230602	0.199437	0.637137	1.00157	0.0309513	0.020356	1.50932	1.93794	2.783	2.26796	1.89203	2.10651	2.03212	2.08737	2.08351	3.80594	4.05826	3.84733	3.1288	2.2764	4.6601	5.93054	2.16617	1.95689	2.01814	2.21394
CG16719	FBgn0036029	0.0609985	0.0828011	1.21468	0.999917	0.0234434	0.0167079	1.62998	1.25524	1.76274	1.5297	1.45528	1.74845	1.92809	2.10025	2.21655	2.84009	2.69083	2.49698	2.67534	1.75603	2.81567	4.13873	1.55904	2.25206	1.90192	2.25744
sut4	FBgn0028560	0.257996	0.212844	0.588387	0.99967	0.0447344	0.026279	1.34936	1.88631	0.562828	0.473526	0.320056	0.083557	0.0390217	0.192866	0.0487519	1.98679	2.31988	1.72758	1.22661	0.489342	2.78061	4.19299	0.0417422	0.2428	0.168025	0.361327
CG31275	FBgn0063261	0.278335	0.221928	0.555432	0.999101	0.0671531	0.0342862	1.17293	1.77083	1.26336	0.345042	0.410132	0.220425	0.105935	0.234116	0.163472	2.42552	2.42684	1.85148	1.16407	0.406898	3.02111	4.1968	0.113128	0.0920501	0.365973	0.545659
CG14401	FBgn0032900	2.64e-07	1.45595e-05	6.5784	0.999023	0.000119612	0.000388966	3.92223	0.542069	4.69356	5.01851	4.90449	5.62445	5.70738	5.61454	5.90404	6.02717	5.68242	6.36116	6.24119	6.25135	5.49705	5.29114	5.45458	6.3061	6.23514	6.12482
CG18418	FBgn0035568	0.248493	0.207933	0.604686	0.996658	0.0609718	0.0322801	1.21487	1.69874	0.725682	0.551386	0.322454	0.0546156	0.05633	0.0936003	0.204345	2.28726	2.09789	1.87226	0.87999	0.176875	2.6607	3.97419	0.0608429	0.10601	0.190492	0.358801
CG10841	FBgn0038163	0.276486	0.221061	0.558327	0.995304	0.0522602	0.0291106	1.28183	1.8805	1.06297	0.681313	0.336477	0.266081	0.258736	0.530282	0.124098	2.35686	2.58571	2.17616	1.50424	0.552019	2.97627	4.37758	0.368407	0.134245	0.298056	0.567305
CG16957	FBgn0032519	0.266848	0.216865	0.573736	0.995193	0.0692807	0.0350114	1.15939	1.70479	0.986898	0.583505	0.270588	0.081983	0.0845927	0.129085	0.118106	2.38992	2.31854	2.06796	1.5297	0.516953	2.78432	4.08114	0.089896	0.239212	0.437895	0.317638
CG6553	FBgn0033880	7.18e-06	0.000117023	5.14388	0.991319	0.0191126	0.0144384	1.71868	0.357317	2.7821	3.27319	2.90998	3.40318	3.75973	3.51321	4.16919	3.9048	3.86524	4.15755	4.20551	4.10011	3.41589	3.18676	3.43457	3.29863	3.22898	3.42246
Torsin	FBgn0025615	5.12e-06	9.25128e-05	5.29073	0.990944	8.36e-05	0.000296348	4.07779	0.741583	4.39572	4.48071	4.52832	4.45291	4.48526	4.52719	5.64204	5.41866	5.31689	5.09131	5.27508	5.61558	5.12621	5.20826	5.29503	5.116	5.475	5.20035
CG8038	FBgn0035831	4.28e-07	1.84971e-05	6.36856	0.990472	0.000717251	0.00143322	3.14433	0.453907	2.82919	3.10683	3.03613	3.66212	3.74189	3.74829	4.0972	4.01773	3.82864	4.05244	4.18946	4.24791	3.36433	3.30662	3.66292	3.83071	3.84058	3.75001
sip2	FBgn0031878	0.297639	0.229426	0.52631	0.990102	0.0753798	0.0372415	1.12275	1.77015	1.25376	1.04083	0.523261	0.84678	0.43735	0.866996	0.335486	2.7737	2.67898	2.4025	1.66877	0.671916	3.13697	4.60097	0.390357	0.517846	0.512575	0.699085
CG11784	FBgn0033381	6.7e-07	2.48629e-05	6.17393	0.989987	7.05e-06	5.2879e-05	5.15181	0.78914	3.17713	3.01272	3.15709	2.62374	2.28791	2.44658	4.18215	4.0605	4.07425	2.92211	2.92806	3.08406	4.02761	3.67388	4.01287	2.91992	2.96153	3.10955
CG14355	FBgn0038208	0.352674	0.251531	0.452627	0.987635	0.0663204	0.034005	1.17835	2.06299	1.61076	0.650654	0.405813	0.177116	0.0832715	0.229921	0.159828	2.63589	2.83441	2.67492	1.83779	0.679062	3.52945	5.00937	0.317379	0.417759	0.412794	0.42876
CR43152	FBgn0262682	0.00497464	0.0135054	2.30324	0.986361	0.003694	0.00446425	2.4325	1.03283	0.36512	0.391189	0.376918	0.612918	0.838887	0.513204	1.15416	1.5946	1.34356	1.14475	1.11559	0.989493	1.3844	2.21984	0.627491	0.869867	0.627491	0.930409
CG31473	FBgn0051473	0.0677097	0.0889365	1.16935	0.985698	0.0223346	0.0161529	1.65102	1.28678	1.00234	0.768552	1.12729	0.630464	0.747055	0.943638	1.47472	1.9031	2.47746	1.95925	1.49729	1.17031	2.10936	3.61819	1.03098	1.0893	1.21938	1.30297
CG30487	FBgn0050487	0.256046	0.212015	0.591682	0.981996	0.0775569	0.0379709	1.11038	1.58922	1.3983	1.00446	0.588381	0.360696	0.218145	0.678339	0.475132	2.73184	2.73017	2.27077	2.01327	0.788912	3.03217	4.20969	0.516953	0.374837	0.386227	0.407496
CG15208	FBgn0030247	0.25135	0.20929	0.599721	0.981384	0.040061	0.0243661	1.39728	1.87438	0.212287	0.500453	0.52173	0.0445065	0.100483	0.425372	0.059718	1.99404	2.12487	1.63844	1.1125	0.545441	2.69613	4.11208	0.0493977	0.238928	0.34119	0.400678
CG9129	FBgn0035196	0.40242	0.270228	0.39532	0.98057	0.136656	0.0583122	0.864371	1.80206	2.28455	1.2571	0.658243	0.262665	0.219198	0.446863	0.359956	3.43149	3.35016	3.09966	2.55365	1.17998	3.8136	5.43446	0.358022	0.447628	0.48704	0.76298
CG14448	FBgn0037191	0.210892	0.188758	0.67594	0.980511	0.0581185	0.0313102	1.23569	1.55368	0.630766	0.59457	0.0784979	0.184049	0.199592	0.250704	0.122284	1.97865	2.14443	1.6723	0.920696	0.523858	2.19106	3.6812	0.0926155	0.304052	0.441551	0.34119
CG11635	FBgn0033283	0.218685	0.192872	0.660181	0.980318	0.0544748	0.0299541	1.2638	1.60932	1.24714	0.248823	0.155858	0.0701923	0.0711217	0.221383	0.276763	2.09137	2.22465	1.72585	1.08643	0.540406	2.57981	3.70778	0.19221	0.274923	0.263811	0.193839
CG5144	FBgn0035957	0.0152178	0.0307131	1.81765	0.97956	0.000767222	0.00150172	3.11508	1.54763	2.00841	1.7309	1.72354	2.79757	2.95567	3.06479	2.34783	3.02668	3.02702	3.1226	2.94146	2.63458	3.40535	4.24892	2.45148	3.74942	3.7001	3.54204
Mal-A6	FBgn0050360	0.00968366	0.0220554	2.01396	0.976901	0.665977	0.20632	0.176541	0.140732	8.90287	8.65518	8.67421	8.14835	7.65751	7.67794	9.66182	9.74754	9.7536	9.72811	9.93679	10.4018	8.41759	9.01122	9.22565	8.81715	9.87827	10.1888
CG32483	FBgn0052483	0.00756893	0.0184473	2.12097	0.976258	0.233324	0.089104	0.632041	0.382378	3.10175	3.46003	3.19852	2.12224	2.44784	1.8763	4.70872	4.13558	3.84476	3.7778	3.82396	3.67081	3.45815	3.18734	4.26193	2.98351	3.88532	3.53934
blanks	FBgn0035608	0.0800076	0.100175	1.09687	0.976253	0.0211466	0.0154933	1.67476	1.35331	0.281889	0.445863	0.467129	0.923301	0.844406	2.23416	0.828292	1.88109	1.41426	1.63974	0.838141	1.8841	1.93457	2.68822	0.632023	1.13865	1.07272	1.54814
Cdlc2	FBgn0026141	0.364632	0.255947	0.438145	0.976056	0.0802366	0.0388719	1.09563	1.97909	1.68793	1.00076	0.51168	0.099726	0.10427	0.231453	0.161217	2.86659	3.10072	2.64201	1.59519	0.728922	3.67195	5.05476	0.410928	0.196859	0.364219	0.542728
CG4734	FBgn0033826	0.0214932	0.039542	1.6677	0.975832	0.00478368	0.00534475	2.32024	-1.27515	6.24523	5.82026	6.33253	5.96574	4.86352	5.42772	6.94871	7.24738	7.12943	6.77467	6.69032	7.47	4.49087	4.82508	5.25663	3.75283	5.15983	4.50764
CG14113	FBgn0040814	0.141355	0.146541	0.849689	0.97165	0.0256977	0.0178192	1.59011	1.57061	0.278186	0.299763	0.397021	0.13798	0.149697	0.10427	0.244498	1.97208	1.67334	0.914159	0.903877	0.433681	2.26506	3.25253	0.169198	0.346594	0.207494	0.0946565
CG31294	FBgn0051294	0.219527	0.193457	0.658512	0.971166	0.0742919	0.0368626	1.12906	1.46552	0.313974	0.609355	0.520518	0.0755464	0.180248	0.0605747	0.107517	2.07774	2.17208	1.42045	1.18094	0.306361	2.02724	3.72901	0.0841376	0.0697129	0.124052	0.155582
CG5724	FBgn0038082	0.126671	0.137009	0.897323	0.968688	0.057698	0.031142	1.23884	1.23855	3.53382	3.91276	4.24861	1.30465	0.608961	1.60606	3.26389	6.21196	5.12541	4.10301	3.54504	4.26025	5.101	4.88933	5.42051	3.16347	4.26383	3.56468
CG31091	FBgn0051091	0.0578251	0.0797952	1.23788	0.968411	0.932731	0.266922	0.0302436	-0.0398017	0.567305	0.457388	0.858391	0.128605	0.136913	0.148364	0.44241	1.58416	2.76175	2.86112	1.72683	2.21984	0.464769	0.433958	0.864951	1.62259	1.6787	0.982374
CG32440	FBgn0052440	0.2107	0.188693	0.676335	0.967879	0.0903727	0.0422912	1.04396	1.34794	1.00652	0.551918	0.423332	0.322826	0.110658	0.242016	0.509705	2.31197	2.06373	1.33058	1.07757	0.286768	1.79479	3.96255	0.268231	0.362555	0.374837	0.609285
CG15456	FBgn0040650	1.15e-06	3.43037e-05	5.9393	0.967834	6.91e-05	0.000255033	4.16052	0.640597	3.68812	3.4998	3.51403	3.12618	3.19433	2.93919	4.52942	4.52516	4.55086	4.06945	3.7001	4.0053	4.10435	4.09601	4.42339	3.89325	3.83369	3.79299
CG31787	FBgn0051787	0.198271	0.18195	0.702741	0.967364	0.0355322	0.022493	1.44938	1.68207	0.38584	0.423586	0.40323	0.0802565	0.191825	0.188053	0.306584	1.78263	2.02554	1.46283	0.970887	0.228953	2.54659	3.6239	0.0883876	0.156631	0.195005	0.110035
CG3565	FBgn0035034	0.209462	0.188008	0.678895	0.9667	0.0640196	0.0333721	1.19369	1.48682	0.929738	0.338842	0.38146	0.244287	0.176635	0.176635	0.410481	2.12945	2.01021	1.70055	0.853561	0.442566	2.33225	3.6972	0.0810593	0.335643	0.272971	0.202234
CG14589	FBgn0033063	0.126702	0.137011	0.897217	0.966112	0.0180311	0.0138251	1.74398	1.61125	0.947064	1.04384	1.20648	1.37218	1.01906	0.810001	1.25148	2.55074	2.2935	1.58029	1.69518	1.12333	2.94248	4.09174	0.996913	0.99995	1.04717	1.18175
CG3222	FBgn0036014	0.290618	0.226786	0.536677	0.965498	0.0594376	0.0317844	1.22594	1.81813	0.839523	0.565107	0.400347	0.346379	0.364219	0.261795	0.0608429	2.18014	2.46049	2.13863	1.22056	0.45816	2.97244	4.17747	0.109461	0.31497	0.508473	0.260205
CG43059	FBgn0262361	0.131924	0.140354	0.879676	0.964594	0.0547854	0.0300501	1.26134	1.26949	0.200875	0.556424	0.368822	0.921663	1.04469	0.789405	0.34657	1.78582	1.88752	1.04516	1.00234	0.469758	1.44587	3.25382	0.234878	0.321502	0.262153	0.361012
CG5840	FBgn0038516	1.47e-05	0.000191014	4.83268	0.964237	5.41e-06	4.40069e-05	5.2668	1.06632	4.68168	4.93569	4.77935	4.59907	4.88158	4.45511	5.73819	5.72693	5.82431	6.169	5.82431	6.15258	5.80053	5.64554	6.1496	6.43607	6.38379	6.43688
CG8750	FBgn0040812	0.257824	0.212776	0.588677	0.963591	0.0877316	0.0413787	1.05684	1.50777	1.12007	0.699085	0.326127	0.163463	0.175581	0.431218	0.286502	2.07168	2.67787	2.24477	1.46777	0.77254	2.49304	3.97685	0.198707	0.145158	0.486328	0.28965
exu	FBgn0000615	0.342397	0.248139	0.46547	0.96335	0.0938551	0.043594	1.02754	1.77313	2.65302	2.09126	1.90158	1.60148	1.67243	2.031	1.50122	3.93617	4.09852	3.77437	2.92219	2.03264	4.60184	5.95157	1.41185	1.86832	1.99064	2.21753
Klp59C	FBgn0034824	0.311395	0.235588	0.506688	0.963011	0.0652387	0.0337528	1.18549	1.84889	0.991357	0.506271	0.351975	0.0628858	0.0639949	0.20427	0.035171	2.06185	2.64161	2.17856	1.34356	0.521055	2.9706	4.35567	0.0700032	0.161931	0.246472	0.379647
CG30324	FBgn0050324	0.359696	0.254044	0.444064	0.962901	0.090499	0.0423434	1.04336	1.86113	1.89338	1.09908	0.570752	0.469758	0.241685	0.448093	0.379836	3.09831	2.97377	2.87758	2.25712	0.85364	3.66384	4.97811	0.504653	0.477538	0.369408	0.671592
CG8065	FBgn0036075	0.24831	0.207927	0.605006	0.961926	0.0478333	0.0275141	1.32027	1.74681	0.634915	0.496479	0.470946	0.150733	0.159377	0.348598	0.0944937	2.37382	2.01981	1.46777	0.858717	0.28135	2.64673	4.0151	0.18094	0.202863	0.294072	0.312209
CG42523	FBgn0260428	0.363267	0.255617	0.439774	0.961719	0.1129	0.0501368	0.947306	1.74052	1.72051	0.786231	0.31184	0.15392	0.0696359	0.456743	0.268231	2.78234	2.65317	2.41369	1.51099	0.246472	3.2888	4.6757	0.0756419	0.391917	0.557899	0.515555
CG13091	FBgn0032055	0.0116234	0.0249449	1.93467	0.961302	0.181994	0.0727831	0.739943	-0.458003	6.67991	6.95838	7.06465	6.08048	5.49262	5.96785	8.62976	7.41951	7.53758	7.10431	6.9103	6.82647	7.08607	6.11591	6.12696	5.9343	6.10015	6.26894
CG4631	FBgn0032590	0.362407	0.255249	0.440803	0.959652	0.0955194	0.0441955	1.01991	1.83374	1.68267	0.623669	0.412114	0.047063	0.079338	0.162467	0.0633573	2.7969	2.73715	2.18478	1.8763	0.746904	3.37571	4.75793	0.0860345	0.119148	0.292438	0.252869
CG18266	FBgn0031724	0.237802	0.202598	0.623784	0.959347	0.0260931	0.018004	1.58347	1.95874	0.367272	0.257378	0.247557	0.111573	0.118509	0.2531	0.0414062	1.89037	1.81847	1.52231	0.886405	0.0884478	2.70468	3.91465	0.129085	0.250438	0.151668	0.265821
CG6332	FBgn0038921	0.215313	0.191093	0.66693	0.958636	0.0372911	0.0232225	1.42839	1.71577	1.85674	1.43709	1.07654	1.1537	1.06375	1.29413	1.29154	2.75229	3.20246	2.89124	2.2935	1.48908	3.44188	4.7725	1.30329	1.07206	1.3844	1.73689
Jon74E	FBgn0023197	0.0226984	0.0410898	1.644	0.957956	0.301271	0.109851	0.521043	0.396108	6.68082	7.58468	7.14826	4.52653	4.40594	5.05854	8.77601	7.55536	7.95625	7.23124	7.23836	6.48332	7.27263	7.68184	7.64761	6.3056	7.26283	7.08047
CG5565	FBgn0031335	0.292042	0.227142	0.534555	0.957175	0.0545358	0.0299705	1.26332	1.85012	1.13532	0.524652	0.36915	0.822518	0.584414	0.8309	0.0983577	2.40773	2.39456	1.94752	1.42856	0.72959	2.85764	4.45174	0.270107	0.209376	0.262276	0.40641
Amy-p	FBgn0000079	0.0184688	0.0352921	1.73356	0.95501	0.612497	0.193481	0.212896	-0.182317	9.15657	9.71816	9.24491	9.11281	8.59122	8.91299	10.8729	9.98552	10.1262	10.1181	10.3418	10.1262	8.50978	9.74754	9.31537	8.96848	9.99522	9.84507
CG14926	FBgn0032360	0.538666	0.321228	0.26868	0.953561	0.215736	0.083537	0.666077	1.96901	3.42614	2.02664	1.11559	0.467129	0.0881882	0.487922	0.128331	4.54471	4.75601	4.19721	3.52853	1.55341	5.2133	6.68867	0.573436	0.362786	0.724631	1.0657
CG6660	FBgn0039030	0.0233034	0.0419671	1.63258	0.952478	0.12636	0.0547591	0.89839	-0.602221	3.29441	3.53462	3.70879	2.76104	2.57486	2.76104	5.42223	4.0298	3.94322	3.60845	3.53795	3.35055	3.4875	2.25492	2.98873	2.75215	2.79468	3.20837
CG15475	FBgn0032867	0.288537	0.226004	0.539798	0.952288	0.0505423	0.0285393	1.29634	1.86322	0.98756	0.44976	0.504653	0.351544	0.167586	0.22022	0.0983577	2.07893	2.62155	2.23416	1.58632	0.665142	3.02438	4.23714	0.270107	0.363132	0.262276	0.369416
CG1324	FBgn0031129	0.372678	0.259247	0.428666	0.951474	0.091742	0.0428203	1.03743	1.88318	1.3969	0.987522	0.36512	0.194579	0.12489	0.223511	0.0755811	2.62964	2.89875	2.31133	1.90034	0.708981	3.50799	4.83083	0.0602742	0.355267	0.46434	0.755144
CG42822	FBgn0262004	0.000555081	0.00274345	3.25564	0.951104	0.381617	0.132806	0.418372	-0.185552	2.71835	2.45356	2.06246	3.34817	3.31916	3.37049	3.31781	3.73961	3.03027	3.44612	3.31851	3.54204	1.90192	2.39084	2.38496	2.73284	2.29714	2.52213
CG40198	FBgn0058198	0.14053	0.146116	0.852231	0.945042	0.294629	0.107826	0.530725	0.656284	2.77276	2.06373	1.96221	2.12945	2.16875	2.03202	4.47409	2.16279	2.99695	2.42552	2.40463	2.96698	3.09307	2.20442	3.47006	1.9037	3.06659	4.03017
CG42657	FBgn0261522	0.21582	0.191471	0.665908	0.942749	0.0265562	0.0182383	1.57583	1.82337	0.690293	0.551445	0.250017	0.309578	0.179214	0.178693	0.415335	1.81847	2.08619	1.86529	0.992276	0.171483	2.58158	3.93626	0.444021	0.339135	0.276163	0.428656
CG14740	FBgn0037988	0.306666	0.233494	0.513334	0.939729	0.0545832	0.0299844	1.26294	1.87445	1.01021	0.60058	0.276965	0.130075	0.138913	0.280869	0.124636	2.4758	2.10651	2.15307	1.52036	0.371224	2.98037	4.31033	0.220425	0.0770298	0.406734	0.568882
CG11241	FBgn0037186	8.06e-07	2.79032e-05	6.09366	0.939567	1.83e-05	0.000101052	4.73755	0.692034	3.72878	3.57049	3.74829	3.4115	3.30501	3.23661	4.65568	4.64091	4.56967	4.42627	4.34364	4.32342	4.42866	4.16331	4.53169	4.29504	4.61888	4.60921
CG13833	FBgn0039040	3.26e-06	7.14707e-05	5.48678	0.938722	1.52e-06	1.88942e-05	5.81816	1.01025	6.26974	6.57783	6.48777	4.93934	4.92755	4.97691	7.11841	7.52395	7.50914	7.05955	7.12331	6.82328	7.50914	7.3881	7.46883	7.27263	7.0476	7.12331
CG9331	FBgn0032889	3.45e-06	7.37066e-05	5.46218	0.936697	0.00109826	0.00192057	2.95929	0.495184	6.20286	6.17808	6.26632	5.99583	5.81681	5.92052	7.31742	6.92576	7.21417	7.27644	7.08388	7.16155	6.62862	6.57735	6.92685	6.79584	7.00976	7.10431
CG14352	FBgn0031351	2.26e-06	5.38636e-05	5.64589	0.936659	0.000534176	0.00116998	3.27232	0.521228	3.1466	3.11045	3.22592	3.14162	3.08796	3.12106	4.2079	4.20046	3.8846	3.48115	3.71286	3.81329	3.73775	3.46892	3.83999	3.44188	3.51321	3.61646
CG15128	FBgn0034467	0.355018	0.251913	0.44975	0.935741	0.0768556	0.0377304	1.11432	1.88251	1.24254	0.74345	0.293556	0.184448	0.334513	0.476235	0.0362933	2.33481	2.71567	2.15235	1.67984	0.397686	3.19048	4.62637	0.110228	0.256263	0.307171	0.512354
CG32450	FBgn0052450	0.340971	0.247729	0.467283	0.935479	0.0734697	0.0365494	1.13389	1.85028	1.63758	0.833816	0.410285	0.331544	0.0851099	0.129535	0.317379	2.62064	2.7501	2.49298	1.7918	0.6986	3.28013	4.73898	0.413431	0.161749	0.289429	0.672115
CG3739	FBgn0038702	0.0187802	0.0357288	1.7263	0.935474	0.197384	0.0776084	0.704688	0.470222	6.7915	6.41428	6.28861	4.19204	4.27286	4.50021	7.631	7.95176	6.71805	7.39258	7.48755	7.45402	6.93184	6.76416	7.20905	6.75496	8.0575	7.91929
CG42847	FBgn0262036	0.32512	0.24105	0.487956	0.933574	0.104955	0.0473928	0.978997	1.59572	1.43149	0.802608	0.51673	0.0866936	0.206671	0.201952	0.33843	2.76366	2.44946	2.29593	1.61544	0.689549	3.09101	4.35002	0.0969722	0.171011	0.206671	0.629437
CG31205	FBgn0051205	0.00677185	0.0170116	2.16929	0.932256	0.000372795	0.00091025	3.42853	1.39617	5.07114	6.12501	5.25465	5.67615	5.64113	5.37272	6.42825	6.73611	6.08321	6.19928	6.49758	5.97365	7.06818	7.05955	6.5116	6.82571	6.30591	6.20061
CG4198	FBgn0029753	0.227189	0.197602	0.643613	0.932009	0.0524532	0.0291904	1.28023	1.5758	0.548269	0.282754	0.312175	0.0311921	0.0696574	0.138705	0.0391905	1.57606	2.32397	1.41974	0.905435	0.515787	2.13863	3.65627	0.0756805	0.0964556	0.0850244	0.254433
CG12784	FBgn0038356	0.191998	0.178577	0.716703	0.931616	0.0555115	0.0303329	1.25562	1.42872	0.546643	0.466461	0.327649	0.164418	0.176329	0.118967	0.287569	1.70693	2.1411	1.13353	0.77512	0.654241	1.73212	3.69502	0.199777	0.145825	0.232292	0.201363
CG31407	FBgn0051407	0.332054	0.243941	0.478791	0.929799	0.0952322	0.0441195	1.02122	1.66584	1.54051	0.812903	0.434099	0.196027	0.29896	0.264445	0.342779	2.51013	2.72399	2.15774	1.37091	0.737684	3.24776	4.43871	0.0985554	0.174468	0.421261	0.11992
CG16926	FBgn0040732	0.00156257	0.005745	2.80616	0.929178	4.63e-05	0.000192957	4.33442	1.41523	6.4462	7.49398	7.10615	6.9251	6.53543	6.53912	8.15686	8.01949	7.65751	8.24317	8.01191	8.02632	8.68326	8.29827	8.31049	8.68163	8.76182	8.58503
Yp3	FBgn0004047	0.0623554	0.0841134	1.20513	0.928352	0.841675	0.246966	0.0748556	-0.0922297	0.980566	1.25166	1.11264	2.54542	2.40773	2.44946	3.25695	1.12206	1.75092	4.60435	4.94227	3.88964	0.733513	0.667762	1.6669	1.84899	2.01021	2.02055
CG33060	FBgn0053060	0.177165	0.170414	0.751622	0.927903	0.0478335	0.0275141	1.32027	1.42602	0.409215	0.676161	0.317795	0.299763	0.169096	0.115136	0.274923	2.15126	1.7607	1.04267	0.846388	0.635425	2.02033	3.47063	0.190284	0.364109	0.305348	0.280834
CG31674	FBgn0051674	0.000321236	0.00181411	3.49318	0.92757	0.000189548	0.000552562	3.72228	0.986954	3.17281	3.06659	3.08499	2.8005	2.7821	2.81042	4.07187	3.81724	4.21799	3.99942	4.08743	4.28102	3.88964	3.94612	4.44949	4.03017	4.74344	4.66098
CG32591	FBgn0052591	0.238623	0.203005	0.622288	0.927366	0.0268474	0.0183855	1.5711	1.88536	0.741831	0.507533	0.297604	0.35304	0.369094	0.521301	0.347963	1.51604	2.46507	1.92385	1.2213	0.611551	2.67905	4.08424	0.439754	0.391595	0.494729	0.779332
CG9961	FBgn0031451	0.0128063	0.026935	1.89258	0.926617	0.000532991	0.00116828	3.27328	1.48415	1.06433	0.576099	0.684627	1.67037	1.77453	1.31968	1.42045	1.80301	1.88145	1.52577	1.47835	1.16763	2.31867	3.03874	1.4201	1.77263	1.52766	1.46381
GstE7	FBgn0063493	0.00374179	0.0110023	2.42692	0.923875	0.000843612	0.00159577	3.07386	1.13738	4.71811	5.29329	4.9034	5.33515	4.57058	4.57187	5.74523	6.15708	5.78411	6.10465	5.94804	6.4152	6.29196	5.97949	6.05548	6.1083	6.89411	6.78856
CG15528	FBgn0039742	2.52e-06	5.91683e-05	5.5986	0.92279	0.000659235	0.0013521	3.18096	0.505525	5.17125	5.29289	5.14599	4.52176	4.49478	4.49962	6.0798	6.31922	5.97949	4.75297	4.35538	4.55338	5.79736	5.51383	5.81553	4.27586	4.25695	4.39751
Jon25Bii	FBgn0031654	0.127775	0.1377	0.893554	0.920876	0.597507	0.189937	0.223657	-0.305274	4.49849	5.36984	4.06287	0.899636	0.566944	0.955324	6.44059	5.16644	5.08681	4.93325	4.16331	3.65627	3.22825	4.97427	4.81286	2.83812	3.11499	1.84887
CG31816	FBgn0051816	0.241726	0.204581	0.616677	0.919232	0.151253	0.0630443	0.820296	1.14414	1.71032	0.419391	0.136074	0.367838	0.497831	0.390622	0.458648	2.46541	2.09942	1.95574	1.63844	0.509705	1.85163	3.52621	0.320371	0.348007	0.373643	0.569128
RpL10Aa	FBgn0038281	0.29848	0.229755	0.525085	0.918974	0.0501486	0.0283964	1.29974	1.84098	1.02618	0.37079	0.189584	0.0857123	0.290397	0.312514	0.128758	1.91985	2.29487	2.14305	1.28535	0.611613	2.86013	4.15334	0.096026	0.310966	0.367484	0.35031
CG4666	FBgn0029838	0.00585612	0.0153113	2.23239	0.918911	0.667201	0.206624	0.175743	0.121165	4.9603	5.28919	5.26752	4.9981	4.44465	4.69954	6.81419	5.72108	5.73846	5.67337	5.42665	5.51914	5.68528	4.99119	5.20403	5.25084	5.22221	5.56153
CG32655	FBgn0052655	0.341182	0.247783	0.467014	0.91767	0.0891121	0.0418719	1.05006	1.71267	1.55195	0.557808	0.472005	0.0487715	0.111615	0.244745	0.177116	2.46581	2.69184	1.97488	1.72354	0.739146	3.12106	4.47795	0.120758	0.0978534	0.304144	0.248471
CG6441	FBgn0031920	0.221435	0.194338	0.654754	0.917415	0.0225543	0.0162759	1.64677	1.86071	0.995517	0.737235	0.45252	0.717514	0.551445	0.89845	0.318946	2.21394	2.40463	2.08688	1.636	0.979511	2.73514	4.18549	0.846751	0.727184	0.778662	0.893208
CG12521	FBgn0040816	0.219774	0.193587	0.658024	0.91716	0.0758119	0.0373826	1.12026	1.37658	0.854567	0.62246	0.34565	0.176635	0.191017	0.458946	0.305639	2.13315	2.13537	1.52053	0.864951	0.619085	2.02664	3.71509	0.210675	0.15622	0.130064	0.40323
CG7309	FBgn0032314	0.26748	0.217183	0.572709	0.916678	0.0471959	0.0272621	1.3261	1.74288	0.662889	0.525631	0.25713	0.0991751	0.0656711	0.251774	0.0905485	1.9665	2.13863	1.71311	0.91751	0.398962	2.60531	3.95841	0.110576	0.195471	0.210535	0.262153
Hexo1	FBgn0041630	3.05e-05	0.000324343	4.5157	0.91663	0.0184473	0.0140504	1.73407	0.385724	4.50934	4.62703	4.58373	4.4335	4.34867	4.40126	5.84463	5.25265	5.37272	5.54931	5.3943	5.44337	4.8464	4.88302	5.14786	5.14484	5.5085	5.50558
skpF	FBgn0034863	0.237897	0.202606	0.623611	0.915456	0.0410032	0.024766	1.38718	1.68695	0.715439	0.329311	0.0891221	0.0957749	0.228468	0.28695	0.15248	1.76274	1.96502	1.61032	1.24311	0.444986	1.99567	3.9506	0.248471	0.188805	0.339003	0.195818
Cpr67Fb	FBgn0036110	0.00745776	0.0182816	2.12739	0.912018	0.671448	0.207559	0.172988	0.123429	1.22056	1.23004	1.3673	1.32032	1.75618	1.83227	1.8501	2.28003	2.42383	2.05666	1.81889	2.40604	1.31021	0.83168	2.0463	1.84076	1.68421	2.26896
CG32119	FBgn0052119	0.313043	0.236345	0.504396	0.911369	0.078822	0.0384199	1.10335	1.66236	1.26954	0.580379	0.383908	0.245837	0.0773008	0.435544	0.193676	2.2465	2.52776	2.22435	1.42477	0.561452	2.80622	4.21274	0.201952	0.222622	0.391595	0.60058
CG13618	FBgn0039203	0.183235	0.174055	0.736992	0.91021	0.367638	0.128942	0.43458	-0.603311	1.98577	1.69186	1.24769	2.02704	2.2457	2.40773	4.31536	1.40466	1.93593	2.1893	1.48908	2.0407	0.718935	0.59457	1.80188	1.10569	2.14817	2.59389
CG2070	FBgn0033203	0.0160394	0.0318295	1.79481	0.910115	0.385837	0.134015	0.413596	-0.292513	0.552103	1.49886	1.87823	1.09423	0.990747	1.26222	2.59871	2.28859	1.77224	1.4985	1.59258	2.08619	1.12883	0.569166	1.35366	1.39633	1.72585	1.50098
CG31704	FBgn0051704	0.000130853	0.000930908	3.88322	0.906656	0.270057	0.100317	0.568545	0.189742	3.69833	3.60167	3.51877	4.34583	4.29168	4.37107	4.51025	4.3382	4.69029	4.75207	4.93325	5.17155	3.74435	3.42965	4.21399	4.49524	4.46413	4.54252
CG31861	FBgn0051861	0.116526	0.12946	0.933577	0.906006	0.0109059	0.00963851	1.96234	1.6111	0.0936157	0.389978	0.303642	0.0908114	0.309136	0.512354	0.470946	1.3983	1.636	1.04122	0.765691	0.252477	1.74039	3.33011	0.550024	0.485124	0.382172	0.718275
CG30056	FBgn0050056	0.166728	0.163637	0.777991	0.905627	0.0205232	0.0151806	1.68775	1.64073	1.40218	0.600768	0.257744	0.34936	0.36643	0.340547	0.876733	1.85338	2.24746	1.65845	0.943638	0.799307	2.69717	3.74135	0.744372	0.649523	0.332812	0.681042
CG7813	FBgn0034133	0.272144	0.219439	0.565201	0.9047	0.0242943	0.0171356	1.6145	2.02441	0.0254179	0.446461	0.339117	0.187943	0.087762	0.237501	0.0714205	1.96096	1.49272	1.44128	0.865011	0.20639	2.88998	3.96822	0.0260318	0.22346	0.26989	0.368051
CG43134	FBgn0262608	0.081396	0.101578	1.0894	0.903312	0.540324	0.17547	0.267346	-0.29929	3.16802	3.5773	3.02406	4.83064	4.13307	4.27651	5.3712	3.2052	3.90292	3.71252	4.10602	4.08114	3.04047	2.56202	3.26902	4.04922	4.86797	5.3116
CG12229	FBgn0036723	0.155034	0.156245	0.809573	0.902281	0.0198094	0.0148222	1.70313	1.59715	1.50997	0.961109	0.914159	0.721916	0.85364	0.812881	1.17086	2.46975	2.45148	2.03555	1.89338	0.893502	2.83491	4.12478	1.21701	0.873751	0.882098	0.968479
CG31988	FBgn0051988	0.564665	0.330878	0.248209	0.901888	0.215689	0.083536	0.666172	1.99033	3.26415	2.08351	1.14337	0.325367	0.38584	1.17498	0.08617	4.6852	4.42532	4.21999	3.0023	1.52926	5.23134	6.79071	0.439975	0.605591	0.812617	1.13865
CG15638	FBgn0028943	0.233578	0.200766	0.631568	0.901096	0.0375227	0.0233161	1.42571	1.67948	0.858391	0.154098	0.412794	0.288373	0.159115	0.303041	0.472351	2.09384	1.56238	1.97767	1.09631	0.453431	2.59211	3.69106	0.180545	0.13195	0.383908	0.185941
CG17843	FBgn0038919	0.000425812	0.00224626	3.37078	0.899422	9.54e-07	1.47894e-05	6.02045	1.70605	3.1946	3.23008	3.41492	2.98068	3.02879	3.16966	4.11052	4.1921	4.23524	3.90724	4.15935	4.17363	4.92977	5.47003	4.55796	4.53953	4.36963	4.07925
CG43209	FBgn0262845	0.22991	0.198984	0.638442	0.898938	0.0317824	0.0207364	1.49781	1.7263	0.622876	0.681376	0.619937	0.199715	0.372244	0.717383	0.532868	2.06031	2.02782	1.39715	1.98392	0.816931	2.77276	3.94627	0.384064	0.326319	0.880056	0.648576
CG2533	FBgn0030319	0.162891	0.161343	0.788103	0.898574	0.0365402	0.0229189	1.43723	1.42193	0.650967	0.662159	0.609355	0.945266	1.03305	0.947232	0.913433	1.67569	2.02908	2.01021	1.12333	0.93976	2.08287	3.67343	0.431973	0.768274	0.761927	0.883402
CG8746	FBgn0033330	0.35003	0.250725	0.455895	0.898133	0.0962073	0.044385	1.01679	1.6671	1.72527	0.269672	0.257744	0.0542727	0.0562061	0.138167	0.203877	2.28398	2.45923	2.02908	1.85779	0.63173	2.81185	4.38133	0.0607977	0.174758	0.40646	0.475851
schuy	FBgn0036925	0.352533	0.251506	0.4528	0.896881	0.0805206	0.0389963	1.09409	1.76981	1.29138	0.576478	0.271256	0.103376	0.0306647	0.137284	0.0387846	2.52919	2.26178	2.17069	1.41617	0.483912	2.97963	4.39382	0.075094	0.0955219	0.219496	0.441316
CG14128	FBgn0036218	0.188734	0.177084	0.72415	0.896585	0.0272937	0.0185496	1.56394	1.61638	0.390191	0.0995526	0.335557	0.100539	0.105471	0.278725	0.328989	1.66877	1.5173	1.09145	0.773147	0.200371	2.23808	3.40408	0.0322901	0.199777	0.4536	0.374471
CG9377	FBgn0032507	0.00313609	0.0096272	2.50361	0.895898	0.0522126	0.0291003	1.28222	0.524223	4.41639	4.70336	4.6957	4.2557	4.44418	5.06715	5.51221	5.90129	5.08964	5.90866	5.75722	5.65769	5.15479	5.2195	5.01383	6.80228	6.52717	6.07748
CR43142	FBgn0262616	0.0823959	0.102264	1.08409	0.894333	0.0348424	0.0221884	1.45789	1.12247	0.26102	0.125013	0.117668	0.123493	0.130775	0.0966545	0.216028	1.46085	1.50982	0.838033	0.854376	0.323207	1.24048	2.48095	0.149697	0.237226	0.340085	0.165155
CG32026	FBgn0052026	0.296708	0.229118	0.527671	0.894024	0.0602245	0.0320644	1.22023	1.69987	0.928112	0.579729	0.278725	0.269694	0.231537	0.412365	0.126173	2.07406	2.2684	1.89472	1.17968	0.445863	2.68673	4.06916	0.130287	0.135728	0.300487	0.257685
CG5280	FBgn0035952	0.172646	0.167622	0.762843	0.893348	0.0240615	0.0170426	1.61868	1.58988	1.35837	1.11291	1.15991	0.923392	1.03439	1.22903	1.33103	2.31253	2.66768	2.4386	1.56721	0.91751	2.87091	4.27281	1.2571	1.13446	1.39232	1.02635
CG30049	FBgn0050049	0.0144339	0.0294443	1.84062	0.893147	0.514848	0.168588	0.288321	0.209807	0.981634	1.29101	1.43977	0.516953	0.419298	0.523261	1.99601	2.21729	2.17856	2.07175	2.1359	2.50231	1.20199	0.883402	2.25644	1.67037	2.60799	2.36769
CG32061	FBgn0052061	0.291478	0.226973	0.535394	0.893136	0.140714	0.0596032	0.851663	1.27669	1.36784	0.362326	0.410773	0.0825833	0.0852484	0.0655053	0.119328	2.14645	2.55456	1.7	1.18175	0.382509	2.09441	3.78583	0.0907547	0.0749519	0.290459	0.166535
Gyc88E	FBgn0038295	0.00148078	0.00554749	2.82951	0.892653	0.0825923	0.0396983	1.08306	-0.412659	1.6664	1.60535	1.70392	1.70753	1.73639	1.67998	2.04326	2.88354	2.72682	1.29101	1.40353	1.5124	1.17727	0.830354	1.73007	1.45655	1.5802	1.60297
CG7211	FBgn0031941	0.223406	0.195351	0.650905	0.892027	0.0426302	0.02539	1.37028	1.57538	0.294253	0.443142	0.533799	0.382892	0.317638	0.735619	0.265821	1.88902	1.79243	1.94255	1.05267	0.625842	2.20963	3.6027	0.185019	0.514632	0.114165	0.18878
Jon99Ci	FBgn0003358	0.048623	0.0710669	1.31316	0.888953	0.908776	0.26155	0.0415432	0.047407	6.23104	7.41951	6.61109	2.0335	1.56578	2.73874	8.19711	7.28503	7.44637	7.2996	7.31633	7.26283	6.3061	7.19265	6.90512	6.70001	7.70966	7.63886
CG13733	FBgn0036729	0.233929	0.200851	0.630916	0.887262	0.0392337	0.024036	1.40634	1.63761	0.950704	0.671827	0.417759	0.509705	0.52216	0.675604	0.346357	2.06936	2.28636	1.68765	1.27271	0.663334	2.60014	3.89523	0.457758	0.516953	0.627491	0.804411
CG14168	FBgn0036044	0.000935177	0.00401758	3.02911	0.88624	2.23e-07	5.38091e-06	6.6517	2.12529	1.35643	1.04122	1.7428	1.0706	0.953406	0.920999	1.8778	2.40185	2.51952	0.609355	0.70651	0.822943	3.64809	3.12841	3.73983	0.837365	0.713835	0.857044
CG17083	FBgn0039070	0.295991	0.228751	0.528721	0.885628	0.0669258	0.0342173	1.17441	1.63282	0.943638	0.627381	0.515331	0.1904	0.276188	0.38146	0.37858	2.06395	2.3007	1.83779	1.32872	0.52173	2.76432	4.14694	0.0735386	0.368051	0.195204	0.506536
CG5561	FBgn0031333	0.199916	0.182753	0.699152	0.885097	0.0758216	0.0373826	1.12021	1.26792	0.557361	0.643762	0.120493	0.0584998	0.0599504	0.407603	0.220694	1.96303	1.79318	1.22809	0.915902	0.142027	1.86921	3.1914	0.0647517	0.111573	0.306093	0.321141
CG17777	FBgn0040900	0.00173271	0.00621164	2.76127	0.88439	0.00155425	0.00247316	2.80848	0.897745	3.14704	3.02702	2.7533	1.25945	1.96259	1.35366	3.75283	3.87921	3.94848	2.43495	2.41722	1.99769	4.26838	3.54597	3.80625	2.67905	2.41524	2.25131
CG30412	FBgn0050412	0.320855	0.23941	0.493691	0.884079	0.0630326	0.0329945	1.20043	1.749	1.20569	0.374649	0.319963	0.0532098	0.0553292	0.22286	0.0750187	2.12607	2.35145	2.07745	1.41881	0.458499	2.71567	4.2029	0.228742	0.0521119	0.0941642	0.402747
CG32459	FBgn0052459	0.277655	0.221659	0.556495	0.883203	0.0534212	0.0295673	1.27229	1.66342	0.91389	0.557503	0.361626	0.303041	0.38983	0.512958	0.059917	2.18685	2.23586	1.92185	1.41237	0.523363	2.52919	3.94746	0.346618	0.345716	0.341859	0.460233
CG33189	FBgn0053189	0.00853218	0.0200729	2.06894	0.882457	0.0030707	0.00392228	2.51276	1.03808	3.31328	3.10836	2.92219	3.69682	3.34904	3.40782	3.74395	4.17385	4.07341	4.29696	3.88635	3.58897	4.11036	4.83724	3.51049	3.35508	3.56936	3.30649
Gal	FBgn0001089	0.0678878	0.0891177	1.16821	0.881593	0.0395486	0.0241545	1.40287	1.01455	2.31253	2.54745	2.3528	1.4192	1.33117	1.2572	1.92764	3.97419	3.95571	3.62832	3.36902	3.37694	3.13697	3.30134	3.8181	3.25103	4.10721	3.65234
CG32847	FBgn0052847	0.19848	0.181976	0.702283	0.881058	0.0725262	0.0362307	1.13951	1.2743	0.898676	0.392602	0.377504	0.202234	0.217857	0.214382	0.355543	1.86529	2.09112	1.78077	1.21996	0.6374	1.60148	3.50219	0.388014	0.44415	0.521382	0.462244
CG10869	FBgn0031347	0.415144	0.274659	0.381801	0.880478	0.10016	0.0457802	0.999306	1.85819	1.53875	1.55437	0.923392	0.584958	0.818478	0.884565	0.57638	2.95052	3.13105	2.80748	1.97932	0.777659	4.03231	5.23079	0.327997	0.512656	0.492934	0.812881
Surf1	FBgn0029117	4.26e-07	1.84971e-05	6.37059	0.879119	2.11e-05	0.000110965	4.67572	0.60111	4.31732	4.24299	4.30251	4.77889	4.86591	4.66406	5.33762	5.16906	4.9935	5.78232	5.77054	5.58369	4.97047	4.79915	4.89654	5.96426	5.94955	5.7788
CG7069	FBgn0038952	0.113579	0.127185	0.944702	0.877378	0.00766739	0.00747331	2.11535	1.64369	1.30527	1.06417	0.825015	0.824004	0.881348	0.708697	1.35932	2.217	2.25027	2.05519	1.70055	1.38569	2.77659	4.06422	1.28471	1.28888	1.25071	1.44538
b	FBgn0000153	6.8e-07	2.50011e-05	6.16749	0.876373	1.36e-06	1.78317e-05	5.86646	0.820959	6.9251	6.85358	6.7443	6.3884	6.4211	6.37724	7.70272	7.85819	7.59119	6.76309	6.53107	6.38225	7.71076	7.69042	7.58468	6.38225	6.31388	6.18841
Rcd7	FBgn0260461	0.231483	0.199818	0.635481	0.875926	0.0277277	0.018769	1.55709	1.73995	1.34985	1.01304	0.690293	0.902887	0.672115	0.753979	0.66194	2.37229	2.64673	2.18778	1.66489	0.926683	2.98941	4.25729	1.02633	0.875709	0.847953	1.08011
CG7387	FBgn0035852	0.208132	0.187278	0.681661	0.875195	0.027162	0.0185039	1.56604	1.65448	0.420076	0.424798	0.294622	0.501874	0.653665	0.592384	0.34657	1.91729	1.50122	1.39982	1.01761	0.387167	2.35853	3.5696	0.174795	0.45913	0.443281	0.449129
CG1287	FBgn0037506	0.322155	0.23994	0.491935	0.874507	0.0667113	0.0341517	1.1758	1.70765	1.18001	0.58149	0.563861	0.557361	0.515555	0.501283	0.147913	2.54134	2.25963	2.31943	1.72646	0.781416	2.79898	4.30976	0.339557	0.44976	0.36915	0.351544
CG14861	FBgn0038280	0.250135	0.208608	0.601826	0.874171	0.0544441	0.0299496	1.26405	1.54158	0.657428	0.394965	0.344799	0.104167	0.110389	0.126149	0.173855	1.86263	1.98322	1.34727	0.911745	0.319361	2.25945	3.70971	0.0527758	0.206948	0.241952	0.211098
CG16741	FBgn0042198	0.197141	0.181452	0.705223	0.873446	0.0868514	0.0411327	1.06122	1.19277	0.854865	0.120953	0.370573	0.120793	0.369408	0.0955219	0.210095	1.53199	2.22465	1.37717	0.914787	0.397441	1.65144	3.12982	0.143449	0.234867	0.263811	0.163391
CG6140	FBgn0036162	0.311885	0.235771	0.506006	0.87306	0.0449553	0.0263764	1.34722	1.85081	0.755447	0.745485	0.351864	0.16024	0.114543	0.342779	0.040408	2.39955	2.03202	2.36769	1.60695	0.673173	2.76455	4.23259	0.408073	0.744372	0.758036	0.434943
CG3492	FBgn0035007	0.353821	0.251744	0.451216	0.8727	0.0850283	0.0404628	1.07044	1.69836	1.21716	0.612918	0.293185	0.0400718	0.0920501	0.207325	0.0518253	2.31943	2.37012	2.25163	1.39982	0.411476	2.84009	4.27909	0.0991751	0.0391837	0.284911	0.373902
CG6830	FBgn0037934	0.0465983	0.0690653	1.33163	0.872376	0.152624	0.0634867	0.816377	0.600659	4.12865	4.43683	4.79238	3.1489	3.15196	3.27453	4.27286	6.17808	5.52404	5.50334	5.32762	5.29503	5.16026	4.65689	5.34269	4.52035	5.40254	4.82464
CG15530	FBgn0039752	0.141334	0.146541	0.849753	0.871731	0.022741	0.0163698	1.64319	1.44576	1.25652	1.09414	1.21996	1.2213	0.990823	0.742538	1.4454	2.40663	2.33378	1.70753	1.83561	0.866052	2.82072	3.99287	1.09431	0.531577	0.617981	0.655939
CG17744	FBgn0035730	0.269501	0.218161	0.56944	0.871324	0.0471167	0.0272327	1.32683	1.66474	0.58885	0.627491	0.373643	0.0709381	0.171011	0.37635	0.100211	1.83833	2.26541	1.45506	0.609355	0.387663	2.55895	3.83071	0.19454	0.140272	0.402494	0.241267
CG31157	FBgn0051157	0.0404836	0.0625433	1.39272	0.870892	0.219858	0.0848416	0.657858	-0.490987	1.97427	1.9763	2.20442	1.98523	1.47698	1.68267	3.84237	2.61677	2.30853	1.99754	2.23142	2.55456	2.01293	0.896467	1.77263	1.99404	1.96548	2.60394
blp	FBgn0038387	6.58e-07	2.48629e-05	6.18177	0.868854	4.46e-07	8.59501e-06	6.35067	0.900995	5.50405	5.36135	5.43958	4.72184	5.07955	4.87929	6.39389	6.365	6.15266	6.06277	6.08939	5.8602	6.37023	6.26974	6.368	6.23157	6.26713	6.16874
CG15198	FBgn0030283	0.369837	0.258071	0.43199	0.868692	0.0914427	0.0427223	1.03885	1.71058	1.93494	0.88432	0.413706	0.101752	0.107035	0.383156	0.569166	2.52776	2.74212	2.64695	2.1075	0.874589	3.33129	4.67583	0.35758	0.288891	0.368407	0.703045
CG33514	FBgn0053514	0.0370956	0.0588519	1.43068	0.868646	0.107751	0.0484002	0.967579	0.64405	3.5916	3.67723	4.08822	1.68267	1.34768	2.01674	3.83264	5.26855	4.86179	4.52924	4.29338	4.87761	4.44068	4.1541	4.69442	3.57741	4.62227	4.56831
CG31106	FBgn0051106	0.00105178	0.00434912	2.97808	0.868005	0.000856329	0.00161239	3.06736	0.891643	3.66302	3.49675	3.88775	2.70825	2.43803	3.09277	4.50221	4.51822	4.63111	4.51292	4.80578	4.69127	4.39326	4.63562	4.69356	3.92328	4.35504	4.7469
CG9249	FBgn0032922	1.98e-06	4.94256e-05	5.70333	0.867799	2.19e-06	2.37299e-05	5.65956	0.85911	4.234	4.1921	3.93711	3.89776	3.74829	3.99161	5.07399	5.06197	4.83064	4.75349	4.66145	4.52057	4.99098	4.84104	5.10852	5.08574	5.02511	4.99686
CG7202	FBgn0037086	0.308692	0.234355	0.510475	0.867754	0.0762975	0.037543	1.11749	1.58329	1.09431	1.33654	0.301303	0.545291	0.401217	0.640879	0.519319	2.42777	2.38832	1.96553	1.34449	0.37079	2.89875	4.2114	0.37188	0.355607	0.456282	0.764365
CG14488	FBgn0034278	0.312482	0.236109	0.505175	0.86635	0.0547025	0.0300104	1.26199	1.74893	1.14575	0.396853	0.569166	0.361526	0.282663	0.447287	0.22286	1.59206	2.8959	1.78181	1.22279	0.543103	2.99627	4.05712	0.305164	0.530165	0.42304	0.52173
CG13623	FBgn0039205	1.91e-07	1.24094e-05	6.71897	0.864974	1.25e-06	1.71736e-05	5.90309	0.726251	5.38331	5.51383	5.37587	5.17327	5.26441	5.00108	6.42221	6.22565	6.22006	6.75496	6.84534	6.7123	6.14579	6.03623	6.26974	7.03975	6.96626	6.90512
pgant4	FBgn0051956	0.0750652	0.095477	1.12456	0.864808	0.78471	0.234297	0.105291	-0.12397	3.84118	3.52266	3.34391	4.41399	3.6036	3.61539	5.6554	3.77072	3.87606	4.06569	4.59608	4.43112	3.08375	3.55306	3.69903	3.51877	4.29312	4.27083
CG11044	FBgn0034484	1.68e-05	0.000210794	4.77469	0.864609	0.000187924	0.000550832	3.72602	0.665476	4.83779	4.62449	4.69029	4.89298	5.03651	4.77538	5.6465	5.68646	5.41343	5.7989	5.72713	5.44471	5.42665	5.14484	5.57751	5.35869	5.32762	5.19307
CG5139	FBgn0031323	0.343342	0.248427	0.464273	0.864377	0.0550459	0.030145	1.25928	1.86183	0.961109	0.563861	0.523363	0.286032	0.508637	0.510228	0.139853	2.17229	2.32932	1.72646	1.54051	0.566944	3.10306	4.42958	0.10119	0.261511	0.320885	0.619937
CG16739	FBgn0034505	0.18598	0.175503	0.730534	0.864032	0.0339318	0.0218019	1.46939	1.47397	2.58424	1.64258	1.98403	1.22661	1.13336	1.50424	2.27281	3.07217	3.45796	2.98411	2.49582	1.46705	3.81502	4.86665	1.9511	1.14551	1.24769	1.26336
osm-1	FBgn0035317	0.000556728	0.00274478	3.25436	0.86378	3.49e-05	0.000155852	4.45717	1.18459	1.61032	1.68532	1.77933	0.867516	0.988913	0.892424	2.67144	2.57847	2.4164	0.862082	1.18278	1.41185	3.00605	2.37317	3.2495	1.36757	1.4344	1.38409
CG42383	FBgn0259729	0.254726	0.211174	0.593927	0.863313	0.0822257	0.0395989	1.08499	1.36872	0.987573	0.262188	0.107987	0.114398	0.053363	0.0463951	0.196798	1.7934	1.95749	1.78728	1.21153	0.488157	1.82687	3.57791	0.0591281	0.169133	0.139382	0.192339
CG3809	FBgn0037995	0.35274	0.25154	0.452545	0.860435	0.0733396	0.0365036	1.13466	1.74645	1.0706	0.540888	0.384464	0.0937084	0.0979858	0.149171	0.0571974	2.23853	2.28153	1.97301	1.45357	0.611662	2.76724	4.42068	0.0473876	0.0412477	0.300748	0.389018
CG1340	FBgn0039797	0.350275	0.250725	0.455591	0.860257	0.0579627	0.0312673	1.23685	1.85513	0.936672	0.627491	0.545441	0.159503	0.353493	0.143495	0.0402965	2.29714	2.35294	2.17208	1.41325	0.358022	3.10407	4.3326	0.238326	0.180317	0.285075	0.37635
Mdr49	FBgn0004512	0.000191572	0.0012295	3.71767	0.858394	0.000133327	0.000423494	3.87508	0.894739	3.94413	4.39532	4.41656	3.39577	3.80419	3.8914	4.99929	5.06053	5.27137	5.04852	5.21668	5.14385	5.05658	5.17327	5.21038	4.61679	5.09621	4.97156
CG13313	FBgn0035941	0.0305517	0.0511842	1.51496	0.857343	0.957635	0.27191	0.0188	0.0189757	1.52036	1.79197	1.6669	1.42508	1.43709	1.26068	1.85071	2.77659	2.92396	2.5369	2.39264	3.00142	1.76274	0.979911	2.2935	1.9278	1.97925	2.72076
CG1958	FBgn0029940	0.263083	0.215114	0.579907	0.857231	0.0507785	0.0286061	1.29432	1.58432	0.733513	0.611288	0.0626267	0.0663551	0.0675596	0.258515	0.0939591	1.6941	2.19106	1.26438	1.26918	0.711005	2.14645	3.83369	0.180248	0.312056	0.42291	0.228651
CG6790	FBgn0037915	0.249913	0.20857	0.602211	0.856953	0.0343289	0.0219938	1.46434	1.69174	0.551182	0.410481	0.115751	0.122594	0.228362	0.348901	0.0247758	1.6787	1.9448	1.30585	0.74381	0.224291	2.40185	3.60502	0.145752	0.307596	0.291555	0.312993
Obp99a	FBgn0039678	0.201354	0.183499	0.69604	0.856437	0.0327853	0.0212507	1.48432	1.52815	1.57748	0.813792	0.711369	0.744372	0.839666	0.663977	0.753979	2.30817	2.6098	2.58643	2.33152	1.61661	2.36435	4.07108	1.25166	2.71619	2.76814	3.33872
CG17738	FBgn0038009	0.122464	0.133801	0.911992	0.856187	0.730165	0.221841	0.136579	0.181921	0.186282	0.504653	0.181628	0.527787	0.623003	1.4999	2.35189	0.427556	0.661674	1.46381	3.06126	1.58029	0.413706	0.381745	0.622876	0.8921	1.30353	1.67998
betaTry	FBgn0010357	0.0106074	0.02352	1.97439	0.854917	0.783368	0.234012	0.106034	0.0795215	10.1262	10.6585	10.4816	9.38016	8.79679	8.90287	11.3713	11.1459	11.3138	11.1459	11.071	11.2755	9.93329	10.7188	10.8527	9.59789	10.6187	10.3418
CG5397	FBgn0031327	4.41e-06	8.46802e-05	5.35556	0.85483	0.00367354	0.00444623	2.43492	0.390245	5.09131	5.11154	5.24813	5.37786	5.37587	5.37721	5.96006	5.94879	6.10662	5.94094	5.87761	5.68277	5.54931	5.42859	5.64381	5.93309	5.46624	5.84186
CG8476	FBgn0038127	0.303364	0.232005	0.518036	0.854566	0.0864283	0.0409729	1.06334	1.48414	1.14179	0.79647	0.316351	0.298775	0.248697	0.220659	0.271741	2.06246	2.48411	1.58315	1.28992	0.536343	2.43216	4.08681	0.188053	0.210041	0.394372	0.238456
CG12111	FBgn0030050	0.222019	0.194604	0.65361	0.854501	0.0777548	0.0380548	1.10927	1.27954	1.41617	0.516953	0.401783	0.842088	0.870421	0.965641	0.37085	2.20281	2.32475	1.18032	1.36675	0.723221	1.6466	3.74967	0.777257	0.404354	0.545121	0.490972
Cyp4d20	FBgn0035344	8.35e-05	0.000668312	4.07831	0.854276	0.00338958	0.00421704	2.46985	0.535246	4.80053	4.90868	4.80444	4.2181	4.24489	4.3502	6.05433	5.39319	5.62896	5.64302	5.64576	5.25465	5.46537	5.28129	5.37272	5.59793	5.41974	5.36732
CG9861	FBgn0034844	0.300114	0.23051	0.522714	0.853895	0.0345995	0.0220974	1.46093	1.87866	0.574932	0.424828	0.284911	0.231537	0.06997	0.310259	0.0971673	1.70247	2.04672	1.9406	1.1745	0.513204	2.84123	3.97504	0.104373	0.249279	0.379219	0.402494
Pdh	FBgn0011693	0.0788204	0.0990813	1.10336	0.852867	0.0260504	0.0179855	1.58419	1.12672	1.60441	1.51099	1.64338	1.03722	1.41309	1.03026	3.06556	2.57981	1.67201	2.11791	0.713933	0.987781	2.84303	2.53891	2.75698	2.91149	1.50813	1.538
CG9589	FBgn0038361	0.202388	0.184029	0.693815	0.852375	0.05055	0.0285393	1.29628	1.37331	0.522034	0.712029	0.229687	0.34565	0.405412	0.407004	0.379836	1.70693	1.93411	1.57643	1.27473	0.622059	1.8441	3.47648	0.263109	0.44456	0.52173	0.313997
CG31230	FBgn0051230	0.140122	0.145869	0.853494	0.851625	0.0373143	0.0232319	1.42812	1.26194	0.581832	0.625288	0.347454	0.72759	0.545202	0.544419	0.311464	2.14817	1.64981	1.06054	0.622876	0.758137	1.60606	3.1144	0.619937	0.387167	0.513651	0.825822
CG18180	FBgn0036024	0.106933	0.122475	0.970888	0.851147	0.0112302	0.00984032	1.94961	-1.46139	6.83317	7.05955	6.10015	2.85189	3.0759	3.2052	8.39176	6.69032	7.46423	5.76727	5.93849	5.8565	4.67715	5.60418	5.32738	3.89495	5.64204	5.41866
t-cup	FBgn0051858	0.249665	0.20854	0.602642	0.848899	0.0323846	0.0210528	1.48966	1.69734	0.631579	0.32041	0.206821	0.293471	0.219451	0.338154	0.146319	1.57752	1.98167	1.26936	1.32358	0.645526	2.13034	3.87719	0.243302	0.0854781	0.21956	0.127827
CG13284	FBgn0032614	0.0047343	0.0129493	2.32474	0.847	0.581233	0.185751	0.23565	0.138854	3.86401	3.81301	3.84301	3.62046	3.41492	3.44507	5.28694	4.36235	4.41175	4.43304	4.27487	4.43683	4.25358	3.61539	4.06764	3.79618	4.09251	4.53983
CG1690	FBgn0033442	0.32096	0.239426	0.493549	0.846571	0.0532609	0.029507	1.27359	1.75279	1.10988	0.525645	0.505526	0.318946	0.137908	0.490572	0.228149	2.21175	2.24086	1.7577	1.34777	0.492144	2.93413	4.22121	0.244081	0.338063	0.391452	0.284829
CG10064	FBgn0035724	0.188003	0.176674	0.725835	0.846281	0.0269714	0.0184352	1.5691	1.5269	0.44976	0.445175	0.216827	0.341091	0.288182	0.218605	0.412717	1.46335	1.77453	1.43709	0.947442	0.304144	2.01021	3.39949	0.282754	0.246797	0.238928	0.460851
CG9570	FBgn0031085	0.381197	0.262561	0.418851	0.845993	0.0819216	0.0394817	1.0866	1.76682	1.5416	0.566403	0.302869	0.0495891	0.0503807	0.248287	0.06804	2.50764	2.37317	1.94031	1.77478	0.399747	2.98873	4.50712	0.215489	0.213787	0.277758	0.505526
CG17991	FBgn0039498	0.264638	0.215688	0.577348	0.845493	0.0590331	0.0316485	1.2289	1.5069	0.897633	0.530048	0.677746	0.363312	0.381745	0.588381	0.44508	2.22655	1.97028	1.86585	1.4454	0.521209	2.42684	3.89159	0.307691	0.36643	0.42947	0.399747
CG8838	FBgn0031526	0.343872	0.248542	0.463603	0.845368	0.0605136	0.0321475	1.21815	1.7772	1.37239	0.77254	0.306361	0.837958	0.532716	0.690641	0.521255	2.26636	2.19978	1.72862	1.4503	0.522953	3.05012	4.55038	0.182401	0.313997	0.25398	0.472005
CG31459	FBgn0051459	0.338707	0.246703	0.470176	0.844851	0.0613692	0.0324181	1.21205	1.74975	1.29413	0.229018	0.398103	0.140389	0.298565	0.156255	0.088797	2.00381	2.36319	2.09384	1.14911	0.857416	2.77971	4.21999	0.170787	0.125069	0.282663	0.300487
CG15124	FBgn0034461	0.217707	0.192275	0.662128	0.843958	0.0394887	0.024151	1.40353	1.49846	0.869118	0.464735	0.199531	0.0884234	0.093608	0.071259	0.463167	1.82209	1.78	1.60866	0.755144	0.367272	2.34353	3.45021	0.235014	0.177403	0.31537	0.290621
CG15459	FBgn0031108	0.26166	0.214532	0.582263	0.8434	0.0597893	0.0319054	1.22338	1.48817	1.40677	0.501894	0.563041	0.358801	0.512354	0.608075	0.579189	2.21136	2.21136	1.92621	1.40663	0.796021	2.68763	3.86141	0.387167	0.524302	0.703045	0.51813
CG32081	FBgn0052081	0.327107	0.24161	0.48531	0.842223	0.0356843	0.0225495	1.44752	1.95018	0.74345	0.339557	0.46434	0.0858897	0.144283	0.409048	0.0502235	1.79634	2.22745	1.53395	0.689702	0.31444	3.04196	4.19204	0.163894	0.119293	0.173754	0.383213
TTLL3B	FBgn0031853	0.326779	0.24153	0.485746	0.841903	0.0657595	0.0338531	1.18204	1.66717	1.1745	0.444936	0.405111	0.26056	0.185262	0.28136	0.188805	2.29487	2.06658	1.9448	1.4344	0.716111	2.7304	4.16711	0.128556	0.195581	0.34314	0.237736
CG4995	FBgn0032219	0.190211	0.177774	0.720764	0.839529	0.0566467	0.0307538	1.24683	1.27505	1.22145	1.04704	0.995859	1.25476	1.30928	1.21845	1.11495	2.39316	2.27482	1.9486	1.67998	1.11862	2.38877	3.95768	0.743049	1.04267	1.21882	1.241
CG9634	FBgn0027528	3.13e-06	6.93698e-05	5.50446	0.839313	0.000495676	0.00110864	3.3048	0.486627	3.33392	3.5033	3.44865	3.33035	3.16966	3.20649	4.19388	4.30473	4.3052	4.1828	4.0773	4.16474	3.99287	3.66466	4.08822	3.75851	3.98237	4.05899
c-cup	FBgn0031367	0.286037	0.225123	0.543578	0.838943	0.0531479	0.0294615	1.27451	1.6114	0.516953	0.609355	0.391595	0.169968	0.182557	0.333367	0.109579	1.97406	1.9511	1.43705	1.27239	0.220145	2.53432	3.73197	0.0858233	0.0706017	0.186951	0.389978
Tim13	FBgn0036204	0.258244	0.212863	0.58797	0.838929	0.111646	0.0497646	0.952157	1.21367	1.03722	0.847122	0.449369	0.16847	0.180545	0.52076	0.600112	2.28859	1.96179	2.01593	0.727387	0.572611	2.15211	3.61905	0.203571	0.471657	0.416606	0.472986
CG12362	FBgn0036082	0.300452	0.23062	0.522225	0.838904	0.0828281	0.0397651	1.08182	1.4669	1.20175	0.435314	0.304205	0.101456	0.0675383	0.280735	0.0937875	1.97427	2.38992	1.67984	1.42628	0.597236	2.3495	3.81244	0.180021	0.202234	0.195298	0.290397
CG9014	FBgn0028847	0.325283	0.241096	0.487739	0.838091	0.0597901	0.0319054	1.22337	1.69832	1.11906	0.657119	0.217886	0.0452078	0.0461423	0.402206	0.0605329	2.27905	2.16875	1.90852	1.42938	0.627685	2.8005	4.03409	0.254433	0.144685	0.16014	0.600029
Cht12	FBgn0050293	0.284908	0.224726	0.545295	0.837561	0.0491581	0.0280123	1.3084	1.63745	0.742131	0.551606	0.224364	0.513716	0.374471	0.493633	0.219124	1.79902	2.01264	1.92252	1.27335	0.697306	2.35294	3.92661	0.150891	0.16024	0.22346	0.499871
CG13168	FBgn0033705	0.34201	0.248028	0.465961	0.836236	0.0634836	0.0331662	1.19734	1.72806	0.610534	1.27614	0.53816	0.194914	0.339099	0.496666	0.245837	2.37574	2.31197	1.98779	1.6321	0.165362	2.86643	4.30935	0.433219	0.473461	0.392602	0.466975
CG31468	FBgn0047351	0.596455	0.34079	0.224422	0.83619	0.295965	0.108233	0.52876	1.67988	3.71509	2.43061	1.40195	1.89662	1.02952	1.57611	0.270107	4.81173	4.97439	4.5121	3.89464	2.34417	5.33762	6.82486	0.424813	0.515981	0.673371	1.22591
CG43343	FBgn0263048	0.21631	0.191798	0.664923	0.835691	0.020157	0.0149936	1.69557	1.71393	2.35377	1.78569	1.78181	2.17942	2.09041	2.1746	1.90769	3.27568	3.24499	3.11045	2.71619	2.27777	4.02214	5.15983	1.88109	2.28636	2.02724	2.30343
CG43169	FBgn0262788	0.102774	0.118829	0.988117	0.835574	0.0110241	0.00970117	1.95766	1.4203	1.09201	0.970027	0.588381	0.524302	0.853597	0.740058	1.4242	1.69611	2.03684	1.49467	1.37577	0.995307	2.24511	3.63674	1.02946	0.885501	0.513651	0.935435
Hsc70-2	FBgn0001217	0.233086	0.200561	0.632484	0.835113	0.0541541	0.0298464	1.26637	1.4192	2.07069	1.66489	1.55136	1.09378	1.42628	1.42856	1.79902	2.98979	3.00347	2.74117	2.30883	1.51086	3.609	4.65941	1.27614	1.42137	1.37239	1.46131
CG3085	FBgn0034816	0.340786	0.247633	0.467518	0.834147	0.0566356	0.0307536	1.24691	1.7734	1.56944	1.31968	0.959865	0.620464	0.63455	0.987883	0.752324	2.78868	2.81042	2.7131	2.05277	1.05721	3.53516	4.78607	0.847953	0.930409	1.30329	1.5067
CG42765	FBgn0261833	0.0137334	0.0284187	1.86222	0.832724	0.250873	0.0943997	0.600546	0.348388	1.40663	1.29043	1.60924	1.40466	1.77645	1.90506	2.86701	2.36136	1.57611	2.35886	2.45215	2.14661	2.03555	1.28888	2.02704	2.39084	2.62814	2.32441
CG13978	FBgn0039518	0.328439	0.242073	0.483545	0.830965	0.0624933	0.0328233	1.20417	1.67497	0.909236	0.36855	0.294504	0.188053	0.0998963	0.256492	0.0250761	2.02337	2.01674	1.72683	0.957511	0.268643	2.39924	4.09135	0.10662	0.0657907	0.0782868	0.254778
Cpr51A	FBgn0033942	0.0247581	0.044012	1.60628	0.829105	0.566571	0.181976	0.246746	-0.19047	2.8428	2.92135	3.02922	3.1892	3.02498	3.29762	4.6957	3.23681	3.34817	3.49675	3.59366	3.67723	2.41369	2.69904	3.10923	3.179	3.6721	3.85643
CG10164	FBgn0039088	0.318098	0.238265	0.497439	0.828394	0.0394285	0.0241193	1.40419	1.83758	0.72153	0.415756	0.300487	0.0561088	0.0581974	0.0243018	0.0318865	2.04697	1.8441	1.83341	1.36173	0.419391	2.80481	4.00024	0.145444	0.178848	0.248103	0.240733
CG14275	FBgn0032022	6.69e-07	2.48629e-05	6.17457	0.828079	5.64e-05	0.000218554	4.24872	0.532184	5.36287	5.28387	5.24929	4.78727	4.83982	4.70572	6.25911	6.04497	6.07618	6.07826	6.08636	5.8378	5.78411	5.72468	5.98378	5.88314	5.69657	5.73712
retinin	FBgn0040074	0.130184	0.139221	0.885442	0.826915	0.543476	0.176234	0.26482	0.31826	0.270763	0.196387	0.277758	0.268842	0.789042	0.196387	2.72399	0.233414	0.268248	0.321995	0.10427	0.238587	0.52709	0.31573	0.856869	0.815205	0.203149	0.37947
Acyp	FBgn0025115	0.158405	0.158267	0.800231	0.826776	0.0276904	0.0187612	1.55767	1.3766	0.627491	0.333415	0.434562	0.303211	0.597435	0.116785	0.492279	2.14416	1.23936	1.50767	0.952191	0.766494	2.23829	2.94001	0.346972	0.278381	0.119328	0.198001
CG13700	FBgn0036785	0.320261	0.23913	0.494496	0.822885	0.053462	0.0295752	1.27195	1.69951	0.886777	0.40323	0.339003	0.0307338	0.0679576	0.111069	0.0946271	2.20442	1.79861	1.71548	0.996913	0.680211	2.61293	4.04031	0.0742923	0.0939591	0.196221	0.271201
CG43130	FBgn0262604	0.0505934	0.0730464	1.29591	0.822695	0.0127149	0.0107667	1.89569	1.10791	0.760275	1.10237	0.744226	1.09631	1.46335	1.58851	1.38101	1.6777	2.01625	2.11402	1.29101	1.89662	2.14186	2.80423	0.9845	0.966235	1.40946	1.0745
CG42810	FBgn0261992	0.213122	0.189827	0.671372	0.822649	0.0486139	0.0278185	1.31324	1.37297	0.462936	0.504653	0.479676	0.180545	0.196904	0.355543	0.31634	1.8448	1.75408	1.31097	1.2365	0.328967	2.03147	3.31987	0.214848	0.301303	0.621419	0.217915
Cyp18a1	FBgn0010383	0.000352762	0.00193572	3.45252	0.821941	0.00176153	0.00269073	2.75411	0.668016	3.00962	2.72097	3.17454	2.39127	1.96303	2.29945	3.52845	3.85113	3.99138	3.09482	3.27389	3.14736	3.62521	3.44339	3.84058	3.03874	2.70627	3.08796
CG11068	FBgn0030536	0.114639	0.128049	0.940668	0.821575	0.0132966	0.0111294	1.87626	1.40106	0.609355	0.247022	0.424862	0.325987	0.415756	0.647511	0.666099	1.46259	1.61727	1.05523	0.902287	0.620965	1.85674	3.11531	0.512354	0.295334	0.303211	0.623669
CG13309	FBgn0035933	0.0241115	0.0430887	1.61778	0.821336	0.0374474	0.0232945	1.42658	-0.744733	5.63098	5.66962	6.10653	5.48377	5.32905	5.95383	6.61896	6.6731	6.57909	6.76416	6.86821	7.06144	5.24286	4.86902	5.06105	4.53923	5.14484	6.16688
Dic2	FBgn0038797	0.423579	0.277908	0.373066	0.81844	0.0844037	0.0402456	1.07364	1.85856	1.18517	1.29413	0.415756	0.091854	0.16024	0.11088	0.0551374	2.67492	2.62032	2.30611	1.58315	0.397189	3.50872	4.72108	0.240947	0.263663	0.32458	0.485449
CG13989	FBgn0031786	0.305222	0.232887	0.515384	0.814827	0.0922309	0.0429787	1.03512	1.39203	0.773468	0.654669	0.451912	0.115293	0.265734	0.0914744	0.198886	2.01814	2.1075	1.72734	1.26068	0.173736	2.12572	3.79675	0.133657	0.313421	0.399015	0.157128
CG3964	FBgn0031574	0.194405	0.180085	0.711293	0.814054	0.00962121	0.00884335	2.01677	1.82135	2.01756	1.27624	1.3969	1.92125	2.34641	2.18778	1.33742	2.81823	2.97721	2.50787	1.9752	1.07654	3.49057	4.59672	2.06744	0.828292	0.867516	0.945266
CG10749	FBgn0036328	0.283991	0.224423	0.546695	0.813488	0.0511027	0.0287118	1.29156	1.57149	0.530048	0.422975	0.251257	0.114398	0.053363	0.0463951	0.0726887	1.7934	1.77866	1.50536	1.12845	0.275083	2.16279	3.69682	0.0591281	0.10341	0.186037	0.192339
CG31952	FBgn0051952	0.24562	0.206623	0.609736	0.813029	0.0643816	0.0334844	1.19124	1.35634	0.530048	0.538712	0.31573	0.0521119	0.053363	0.0906692	0.0726887	1.7934	1.95749	1.42566	1.0257	0.417622	1.95992	3.36164	0.13195	0.311753	0.186037	0.192339
CG31482	FBgn0051482	0.353223	0.251631	0.451951	0.811915	0.0910144	0.0425568	1.04089	1.54476	1.45031	0.432953	0.336893	0.101142	0.106115	0.234907	0.377219	1.64298	2.63571	2.00854	1.23917	0.471657	2.63621	4.10484	0.113398	0.200371	0.237501	0.502365
CG43935	FBgn0264563	0.381486	0.262641	0.418521	0.811677	0.0855163	0.0406143	1.06795	1.674	1.77541	1.78263	1.22903	0.567508	1.15707	1.00381	1.21243	3.54641	2.46327	2.63458	2.52522	1.01304	3.84301	5.08952	0.876533	0.782306	1.47168	1.07519
CG43108	FBgn0262568	0.128143	0.137842	0.892305	0.811573	0.0412178	0.0248321	1.38492	1.13529	0.391595	0.537536	0.22648	0.313421	0.23956	0.161454	0.50162	1.64298	1.44573	1.1793	0.817778	0.21992	1.52669	2.7737	0.261078	0.287392	0.165992	0.265821
SIP2	FBgn0061197	0.519567	0.31377	0.284358	0.811432	0.156902	0.0649089	0.804372	1.8468	2.22203	2.35071	1.61884	1.29101	1.46474	1.47745	0.555745	3.89595	4.17419	3.69465	2.93651	1.18134	4.76718	6.10662	0.858183	0.689626	0.878045	1.4219
Pdf	FBgn0023178	6.87e-05	0.000586033	4.16304	0.811128	0.00290885	0.00378457	2.53628	0.508832	3.96599	4.19011	3.77447	3.6972	3.91736	3.51761	4.97729	4.83835	4.54831	4.43091	4.44815	4.26718	4.51518	4.47857	4.46332	4.5164	4.23702	4.2359
CG13405	FBgn0035097	0.212501	0.189626	0.672639	0.811117	0.0593861	0.0317725	1.22632	1.28262	0.497191	0.342541	0.0944937	0.0466413	0.0475569	0.196859	0.0628257	1.75603	1.54872	1.02064	0.788769	0.153638	1.5234	3.14702	0.111656	0.246197	0.124147	0.235761
CG9222	FBgn0031784	0.307732	0.233997	0.511827	0.810959	0.0583443	0.0313847	1.234	1.59279	0.990747	0.389064	0.230863	0.102394	0.2428	0.238326	0.064278	1.81889	2.16039	1.61884	1.35366	0.652227	2.2289	3.95341	0.206747	0.250017	0.206868	0.457454
CG7164	FBgn0031946	0.421683	0.277275	0.375014	0.809949	0.130201	0.056085	0.885386	1.58166	1.74919	0.999553	0.435544	0.268393	0.345507	0.454609	0.0838462	2.73514	2.79514	2.52662	1.9037	0.789323	3.08149	4.60268	0.245091	0.115607	0.364048	0.398989
Hex-t2	FBgn0042710	0.416063	0.274913	0.380841	0.80837	0.110527	0.0493808	0.956532	1.65353	1.78181	0.568448	0.51257	0.186647	0.246197	0.456849	0.126173	2.69139	2.47038	2.26886	1.61032	0.842598	3.18389	4.54489	0.0946271	0.341091	0.61718	0.363829
CG10298	FBgn0037432	0.175868	0.169777	0.754813	0.808364	0.0224461	0.0162063	1.64886	1.47151	1.6169	0.309346	0.615639	0.86115	0.770405	0.830354	1.21142	1.76405	1.9915	1.79664	1.45506	0.7483	2.59238	3.54218	0.821853	0.606964	0.808283	0.874589
CG13018	FBgn0040751	1.13e-06	3.39204e-05	5.94692	0.807587	1.61e-06	1.9589e-05	5.79317	0.781034	4.49623	4.26928	4.22196	3.94263	3.96213	3.7609	5.09005	5.24181	5.07836	4.7041	4.85267	4.74	5.06197	5.04099	5.2276	5.34233	5.1601	5.1175
CG32706	FBgn0052706	5.49e-05	0.000496914	4.26043	0.807047	2.99e-05	0.00013915	4.52433	0.860991	3.40774	2.87615	3.15818	3.12143	3.16084	3.15739	3.95691	3.92164	3.98467	3.96954	4.04047	3.64535	4.01982	3.80139	4.20383	3.98026	3.98521	3.9193
CG5388	FBgn0038944	0.120303	0.132201	0.919724	0.806558	0.0317559	0.0207238	1.49818	1.17176	0.362555	0.209261	0.0857621	0.0899577	0.213693	0.0722028	0.350341	1.17808	1.54884	1.00697	0.794095	0.305494	1.47869	2.59311	0.101079	0.1801	0.0734301	0.0661563
Rpn12R	FBgn0036465	0.255386	0.211635	0.592803	0.805676	0.0580894	0.0313062	1.2359	1.41293	0.531075	0.585783	0.238752	0.0695918	0.248523	0.670846	0.0985554	1.92218	1.7519	1.17063	0.876733	0.290244	2.17427	3.34309	0.077048	0.137944	0.22401	0.342941
Ugt86Dd	FBgn0040256	0.000117001	0.000861676	3.93181	0.803398	0.0130935	0.0110126	1.88294	0.417754	6.1533	6.33937	6.508	5.87761	5.66852	6.06674	6.88253	7.26283	7.26551	7.09816	7.16369	7.3881	6.679	6.68082	6.89411	6.86024	7.03733	7.19116
CG13442	FBgn0034546	0.282353	0.223902	0.549208	0.803121	0.0626067	0.0328528	1.20338	1.46442	0.914159	0.281936	0.317795	0.18128	0.239854	0.129935	0.21992	1.655	2.04833	1.64027	0.859863	0.560835	2.15545	3.66073	0.0909781	0.162057	0.291463	0.218584
plx	FBgn0261261	0.000154227	0.00104946	3.81184	0.802786	4.72e-05	0.000195572	4.32606	0.915043	5.42665	5.30607	5.1545	4.86823	4.87761	4.76718	5.87472	6.43502	5.98584	5.35021	5.30249	5.03714	6.41494	6.23157	5.98584	5.13741	5.00865	4.91888
CG43750	FBgn0264081	0.242277	0.204901	0.615688	0.802469	0.0464445	0.0269418	1.33307	1.44835	0.453431	0.57888	0.535028	0.371224	0.083557	0.244355	0.11631	1.98618	1.87226	1.20885	1.0598	0.426215	1.93135	3.57165	0.409383	0.351544	0.0657605	0.406898
CG42692	FBgn0261582	0.12835	0.137975	0.891604	0.802193	0.093586	0.0435183	1.02879	0.894478	0.106511	0.619937	0.518393	0.103774	0.109716	0.241159	0.387663	1.73212	1.53164	0.861593	1.02635	0.485411	1.25572	2.55513	0.117429	0.205775	0.241328	0.210623
CG32161	FBgn0052161	0.291804	0.227057	0.534909	0.802004	0.037773	0.0233957	1.42282	1.69786	0.609355	0.297604	0.363887	0.276763	0.294547	0.136351	0.131469	1.6321	1.91329	1.83721	0.96145	0.293921	2.34695	3.78882	0.228651	0.250017	0.255871	0.351975
CG3581	FBgn0038697	0.391443	0.26638	0.407331	0.801532	0.0669892	0.034239	1.174	1.8157	1.27614	0.700155	0.522953	0.147257	0.0662415	0.210654	0.0920377	2.4386	2.37321	1.74001	1.50312	0.701579	3.18856	4.58039	0.177403	0.260314	0.287507	0.424828
CG8508	FBgn0038123	0.234474	0.201208	0.629905	0.801466	0.0357166	0.02256	1.44713	1.51421	0.391452	0.36985	0.0623617	0.0659974	0.239352	0.25709	0.257254	1.23004	1.74076	1.06124	0.888201	0.279114	1.81294	3.47997	0.0733753	0.130433	0.251165	0.265275
CG17010	FBgn0032424	0.291152	0.226897	0.53588	0.800271	0.0562347	0.0305764	1.25	1.53136	1.15701	0.219451	0.262188	0.205775	0.0439814	0.150567	0.150203	1.94832	1.94095	1.84899	1.13796	0.697218	2.43609	3.609	0.187642	0.27289	0.115954	0.221277
CG34173	FBgn0085202	0.166784	0.163637	0.777846	0.798607	0.0425913	0.0253783	1.37068	1.23055	0.714688	0.251276	0.242016	0.237736	0.251165	0.171011	0.398962	1.94046	1.26438	1.05267	1.23362	0.432104	1.68071	2.94488	0.274046	0.212886	0.176245	0.409809
CG11018	FBgn0034464	0.267158	0.217042	0.573232	0.797816	0.0434938	0.0257983	1.36157	1.54693	0.756929	0.451156	0.177403	0.0487715	0.0499637	0.128015	0.177116	1.72569	1.87612	1.22138	0.858391	0.259585	2.36642	3.5391	0.120758	0.258384	0.131694	0.279695
CG12506	FBgn0031276	0.365854	0.256522	0.436692	0.797226	0.124757	0.0542363	0.903935	1.40008	2.80594	1.0996	1.75408	5.09005	5.102	5.17889	0.69244	3.95341	3.40544	2.60014	2.29904	2.13134	3.17823	4.95013	1.73149	1.17029	1.45106	1.14551
CG1137	FBgn0037454	0.334385	0.244931	0.475753	0.79715	0.0464232	0.0269404	1.33326	1.75969	1.34288	0.560835	0.160269	0.211914	0.28135	0.191609	0.367442	2.0371	2.05089	1.86374	1.30104	0.369094	2.81548	4.17958	0.348007	0.191633	0.312514	0.403341
CG11404	FBgn0037169	0.154072	0.155576	0.812276	0.796783	0.0106839	0.00950373	1.97127	1.5811	0.0854781	0.083557	0.185262	0.184902	0.0863163	0.13195	0.12322	1.46502	1.15641	0.902287	0.503369	0.128734	2.06185	2.8165	0.219252	0.16472	0.135665	0.469682
Fer3HCH	FBgn0030449	0.0937434	0.11132	1.02806	0.796194	0.0361588	0.0227592	1.44179	1.03159	0.42291	0.0884234	0.199777	0.198443	0.0937032	0.141094	0.463794	0.944042	1.69186	1.05111	0.63173	0.367838	1.18511	2.38496	0.235808	0.177403	0.471683	0.180494
CG1208	FBgn0037386	0.00106102	0.00436829	2.97428	0.794021	0.000157613	0.000481975	3.80241	1.00259	5.2195	5.32534	5.51996	4.56967	4.67162	4.60538	5.96403	6.3468	6.13604	5.73529	5.71525	6.04692	6.36382	6.26423	6.44452	5.25394	5.95901	6.09472
CG15661	FBgn0034605	0.000100892	0.000767104	3.99614	0.793775	0.0510084	0.0286797	1.29236	0.302457	3.43728	3.70676	3.34445	4.08436	3.92883	3.83999	4.22858	4.27659	4.36465	4.67837	4.69043	4.76301	3.72574	3.55513	4.115	4.73898	4.45511	4.81026
CG33498	FBgn0053498	0.0121445	0.0258399	1.91562	0.789818	0.357139	0.125967	0.447163	-0.256396	1.79902	2.13365	2.19106	2.35935	2.1893	1.94335	2.93551	2.30817	3.2495	3.03874	2.82679	3.27201	1.62259	1.37866	2.35329	2.8229	2.53975	2.67905
fig	FBgn0039694	0.2395	0.203496	0.620694	0.789794	0.0630376	0.0329945	1.2004	1.30719	0.650891	0.624481	0.865011	0.9701	0.695577	0.613566	0.356118	1.96152	2.19212	2.02724	1.25266	0.828292	2.07832	3.48644	0.497191	0.512354	0.640626	0.656808
CG14246	FBgn0040608	9.98e-06	0.000149318	5.00087	0.78965	4.64e-06	3.98905e-05	5.33348	0.852153	5.71455	5.72468	5.579	4.64269	4.5519	4.59021	6.31388	6.53543	6.53787	4.91464	5.15677	5.08964	6.63349	6.26333	6.67787	5.3712	5.28291	5.51515
MtnD	FBgn0053192	0.0400377	0.062043	1.39753	0.788179	0.0060505	0.00632592	2.21821	1.13845	4.57631	4.71065	4.49676	4.78252	4.82379	5.07239	5.0623	5.12833	5.95763	5.64381	5.88645	6.41972	5.29329	6.09823	5.80754	5.3556	6.07618	6.68979
CG12780	FBgn0033301	0.100279	0.1168	0.99879	0.787968	0.744222	0.22504	0.128297	0.147754	6.71631	5.99327	6.58308	6.10465	5.73904	5.53266	6.42906	7.66777	7.55974	7.58234	7.54937	8.52299	6.26333	6.31501	7.15759	6.58582	7.66351	7.92147
CG43322	FBgn0263027	1.85e-06	4.69213e-05	5.73283	0.78792	2.81e-06	2.8411e-05	5.55129	0.756853	3.4425	3.2625	3.39813	2.3705	2.4254	2.52213	4.29451	4.18266	3.98972	3.19132	3.27718	2.93877	4.14008	4.08504	4.14856	3.33862	3.33521	3.20843
CG5500	FBgn0039461	2.61e-07	1.45595e-05	6.58336	0.787593	1.04e-06	1.53143e-05	5.98297	0.692209	5.69444	5.64321	5.52171	4.74275	4.85894	4.79302	6.46564	6.43339	6.32311	6.01195	5.93054	5.73846	6.27524	6.23791	6.42283	5.89716	5.73741	5.79736
CG7366	FBgn0035855	0.189307	0.177332	0.722833	0.786753	0.0324825	0.0210973	1.48835	1.36661	0.888874	0.469682	0.275452	0.403581	0.60661	0.264092	0.443003	1.60695	1.94431	1.38409	1.02874	0.30396	1.82578	3.29869	0.609355	0.318746	0.492745	0.517173
CG31076	FBgn0051076	0.0115681	0.0248789	1.93674	0.786049	0.221475	0.0853395	0.654675	0.340616	1.51666	1.85163	1.7506	1.11841	1.20227	0.85437	2.48228	2.42054	2.57421	2.28726	2.72753	2.85189	2.18546	1.39658	2.5587	2.1712	2.47173	2.86013
CG8317	FBgn0034140	7.14e-05	0.000602562	4.1463	0.784056	0.958168	0.271976	0.0185583	0.00710515	5.50774	5.43509	5.59082	5.95551	6.21642	6.15892	6.58697	6.20061	6.09823	6.88668	6.93976	6.6677	5.50622	5.40669	5.64204	6.75936	6.4856	6.42053
gammaTry	FBgn0010359	0.0385794	0.0603087	1.41364	0.783919	0.00145428	0.00236459	2.83735	1.38611	3.43428	3.37218	3.58852	2.55799	1.5254	1.99739	4.43127	3.90701	4.40847	4.122	4.14231	4.15118	4.58977	5.02547	4.93808	3.53971	4.85415	4.91623
Mst89B	FBgn0020399	0.239287	0.203388	0.621081	0.782885	0.0625424	0.0328371	1.20383	1.29795	0.511473	0.240555	0.375332	0.358151	0.29498	0.273593	0.16967	1.7445	1.56184	1.46108	0.856445	0.525362	1.69779	3.27165	0.0517794	0.153915	0.37079	0.396673
CG4520	FBgn0038355	0.298256	0.229678	0.525411	0.782461	0.0512831	0.0287742	1.29003	1.55774	0.761427	0.263561	0.191633	0.0527255	0.0540467	0.220891	0.0734608	1.94358	1.54697	1.18094	0.778662	0.242016	2.12114	3.70919	0.0595215	0.225239	0.140272	0.370573
mir-2a-1	FBgn0262377	0.0829013	0.102723	1.08144	0.78106	0.208062	0.0811292	0.681807	0.549367	4.17289	3.27201	3.10347	3.99378	3.16347	3.62787	4.33605	4.05671	4.49879	2.93298	3.59366	4.67639	3.9055	4.05796	4.23301	3.74846	3.5171	4.33746
CG2663	FBgn0037323	0.0188606	0.0358001	1.72444	0.779461	0.0433168	0.0257277	1.36334	-0.648991	1.65602	2.52776	2.30969	0.479551	0.576099	0.301303	3.17713	2.90242	2.75229	1.56247	1.79361	1.36784	1.55275	0.886995	2.10675	1.32806	1.42816	0.988913
nmdyn-D7	FBgn0028997	0.0510633	0.0735457	1.29189	0.77931	0.00636543	0.00655477	2.19617	1.18598	1.13267	0.803866	0.999751	1.82765	1.96322	1.93383	1.30928	1.92809	2.03684	1.98359	1.54872	1.53944	2.07638	3.12794	1.28992	1.30684	1.20569	1.68071
CG7224	FBgn0031971	0.004532	0.0125269	2.34371	0.779093	0.0178499	0.0137352	1.74836	0.613671	7.15488	6.60635	7.03733	7.55536	7.10615	7.39982	7.43599	7.631	8.06884	7.87314	7.83128	8.12114	7.26829	7.41951	7.95176	8.38361	7.90727	8.14835
CG31697	FBgn0051697	0.155828	0.156649	0.807355	0.777554	0.0108826	0.0096268	1.96327	1.54502	0.9723	0.533836	0.666099	0.876333	0.847686	0.934824	0.802014	1.80703	1.89585	1.9807	1.63061	1.18635	2.44741	3.49408	0.865821	1.14143	1.2216	0.833816
CG34012	FBgn0054012	0.174941	0.169124	0.757108	0.776382	0.0762701	0.037543	1.11765	1.04454	1.0391	0.279779	0.562303	0.570997	0.635425	0.512731	0.81979	1.82484	1.5657	1.50312	1.31695	0.82202	1.87823	2.986	0.150567	0.389328	0.528749	0.242991
CG17944	FBgn0037500	0.326034	0.2412	0.486737	0.774932	0.0508738	0.0286264	1.29351	1.64153	1.00817	0.470047	0.300174	0.0894806	0.0944937	0.0719578	0.139121	1.90221	2.06185	1.84754	1.16763	0.51673	2.57847	3.88714	0.237364	0.178538	0.429936	0.240555
FucTD	FBgn0035217	0.284384	0.224499	0.546095	0.774521	0.037574	0.023329	1.42511	1.61542	0.706481	0.280984	0.0362763	0.0822402	0.0849176	0.0651542	0.118673	1.56396	1.66467	1.30928	1.00817	0.381276	2.23853	3.59059	0.0408696	0.160386	0.165199	0.244355
CG30369	FBgn0050369	0.270431	0.218628	0.567944	0.774323	0.063458	0.0331602	1.19751	1.37039	0.876733	0.323494	0.314126	0.154826	0.166091	0.219223	0.482317	1.48971	1.86529	1.28181	0.640234	0.206671	1.72541	3.71375	0.186356	0.271353	0.115193	0.190676
CG10348	FBgn0032707	6.79e-05	0.000582156	4.16813	0.773632	0.0259034	0.0179136	1.58664	0.330773	2.59026	2.51474	2.58524	2.07331	2.09336	1.98577	3.47006	3.378	3.16308	3.07491	3.11176	2.98037	2.85229	2.58701	3.24326	2.9116	2.79829	2.72212
CG34434	FBgn0250904	0.204808	0.185342	0.688653	0.77337	0.0134435	0.0111728	1.87149	1.66996	0.038527	0.38313	0.219124	0.255401	0.493426	1.34186	0.209575	1.40086	1.35046	1.23569	0.2531	0.248471	2.4164	2.89875	0.335529	0.502841	0.49343	0.627491
CG13280	FBgn0032609	0.184978	0.17515	0.73288	0.773072	0.0203179	0.0150586	1.69212	1.46904	0.318212	0.408467	0.0334339	0.384064	0.340467	0.309346	0.199654	1.42938	1.4503	1.32615	0.898676	0.45583	1.78478	3.09514	0.2873	0.104612	0.211687	0.20661
CG32548	FBgn0052548	0.334524	0.244931	0.475573	0.773032	0.0614677	0.0324628	1.21135	1.58595	1.84899	1.2966	1.17808	0.837365	0.930409	0.886405	0.838311	2.68259	3.12185	2.63976	1.99236	1.11639	3.32094	4.63213	1.12845	1.34743	1.31968	1.2365
CG6746	FBgn0032394	0.00118503	0.00471117	2.92627	0.772774	0.373132	0.13047	0.428138	0.169337	5.8602	5.841	5.97979	5.73477	5.6118	5.70463	7.23272	6.33569	6.43091	6.43091	6.30014	6.18841	6.20286	5.90866	6.07748	6.11273	6.28624	6.32138
CG31029	FBgn0051029	0.414016	0.274363	0.382983	0.772656	0.0690029	0.0348894	1.16113	1.82362	1.79479	1.46631	1.06524	0.851529	0.766494	0.909236	0.614204	2.94636	3.08375	2.82128	1.94358	1.13446	3.83992	5.09521	0.862082	1.32141	1.32806	1.36824
CG12105	FBgn0035241	0.00119714	0.00471975	2.92186	0.771705	0.000563975	0.00120997	3.24874	0.850456	5.22759	5.11358	5.13883	3.47063	3.63226	3.35137	6.02159	5.93776	5.83576	4.4619	4.79482	3.92479	6.08321	6.09752	5.85064	3.80581	3.79675	3.38608
CG42556	FBgn0260758	0.363437	0.255632	0.439571	0.771257	0.0607352	0.0322062	1.21656	1.68956	1.33859	0.627685	0.277355	0.37188	0.580081	0.469682	0.160732	2.27077	2.12589	1.64711	0.924801	0.466121	2.80889	4.19613	0.307293	0.149088	0.640626	0.538175
CG10345	FBgn0027562	0.000205188	0.00129412	3.68785	0.770092	0.000406182	0.000972746	3.39128	0.710029	5.88645	6.25113	5.98202	4.86134	5.31884	5.12804	6.76672	6.90937	6.75378	6.53176	6.55752	6.12519	6.90208	6.7915	6.5561	6.57735	6.5561	6.4152
CG17364	FBgn0036391	7.85e-05	0.000642975	4.10513	0.76973	0.459222	0.154157	0.337977	0.100636	3.3081	3.29235	3.15542	3.18044	3.20956	3.1561	4.14333	3.9504	3.97132	3.79652	3.8591	3.50339	3.36823	3.04283	3.64671	3.47951	3.3081	3.4739
CG32713	FBgn0052713	0.277546	0.22161	0.556665	0.76963	0.0516581	0.0289147	1.28686	1.46188	1.19191	0.404661	0.389328	0.623669	0.322436	0.574633	0.363349	1.81743	2.11402	1.52926	1.31331	0.496692	2.16482	3.74633	0.460401	0.186672	0.277397	0.370141
CG6839	FBgn0036831	0.111815	0.125758	0.9515	0.768812	0.0685942	0.0347604	1.16371	-0.896205	4.42068	5.55863	5.41542	4.56078	3.53441	4.4284	6.57783	5.29574	5.82759	5.763	5.99527	5.34379	3.67366	4.46575	4.56671	4.47171	5.61866	5.28014
CG3955	FBgn0033793	4.22e-05	0.000409302	4.37469	0.768439	0.00137838	0.00227075	2.86063	0.508148	2.23829	2.08985	2.04588	1.54697	1.56816	1.60148	3.00397	2.85301	2.82236	2.55456	2.02724	2.49582	2.65338	2.45809	2.78699	2.31105	2.20281	2.18738
CG7669	FBgn0038607	0.256804	0.21234	0.590398	0.7654	0.0178516	0.0137352	1.74832	1.7629	0.729821	0.300748	0.28825	0.306074	0.231892	0.471708	0.515497	1.56247	1.53705	1.49002	1.09775	0.307786	2.45498	3.76937	0.383182	0.363132	0.529038	0.471657
CG12617	FBgn0040996	0.393794	0.267183	0.404731	0.764505	0.0958055	0.0442536	1.01861	1.56223	1.07829	1.01698	0.722255	0.13359	0.143449	0.102175	0.237905	2.38745	2.48568	2.12487	1.42697	0.703045	3.03123	4.31007	0.162906	0.343947	0.27842	0.72153
CG33491	FBgn0053491	0.0177846	0.0343304	1.74996	0.76403	0.115148	0.0509067	0.938744	-0.472879	2.0854	2.30229	2.25402	2.47073	2.65464	2.22435	2.99695	2.83662	3.10023	3.30694	3.40064	3.20054	1.50424	1.10663	2.6122	2.67558	2.61807	2.60087
CG6209	FBgn0033862	0.33883	0.246703	0.470018	0.763212	0.0617432	0.0325424	1.20941	1.57845	1.1022	0.437975	0.345781	0.132872	0.225426	0.242504	0.306074	1.78728	2.08225	1.65393	1.38409	0.540406	2.62964	3.92479	0.0668808	0.0871749	0.22572	0.291078
Cyp4g1	FBgn0010019	0.0472346	0.0696496	1.32574	0.763126	0.304403	0.110801	0.516551	-0.370401	10.8899	11.1459	11.2755	11.0317	10.6187	10.8527	12.858	11.3713	11.3713	11.863	11.863	11.677	11.2755	10.4816	10.443	11.2023	11.2023	11.4598
CG1774	FBgn0039856	0.000240211	0.00145503	3.61941	0.762049	0.0022291	0.00315642	2.65187	0.572385	5.53965	5.8602	5.64032	4.8012	5.17889	4.71727	6.56733	6.54257	6.21642	6.07748	5.82026	5.69096	6.34765	6.18595	6.22372	5.30666	5.56153	5.59938
CG16964	FBgn0032385	0.284183	0.224483	0.546402	0.7619	0.059843	0.0319218	1.22299	1.41217	0.60139	0.466461	0.44149	0.112096	0.118967	0.175995	0.191524	1.8295	1.77402	1.28888	0.805649	0.302026	2.00898	3.60754	0.129316	0.101268	0.249279	0.0802565
CG1681	FBgn0030484	0.00146321	0.00549034	2.83469	0.761454	0.0206027	0.0152276	1.68608	0.494512	7.12331	7.16728	7.2834	7.09307	6.75936	6.9367	7.79237	8.06419	8.0018	8.01949	8.10487	8.23823	7.50233	7.68387	7.87134	7.55776	8.20653	8.43933
CG2528	FBgn0032969	0.3196	0.238787	0.495393	0.761342	0.0630792	0.0330019	1.20011	1.50181	1.03583	0.380977	0.0838774	0.0552745	0.0571974	0.139884	0.0311476	1.83779	1.91577	1.4486	0.987679	0.366277	2.18014	3.68544	0.140537	0.144283	0.230213	0.215664
alphaTry	FBgn0003863	0.0307425	0.0513949	1.51226	0.761233	0.630125	0.197421	0.200573	0.153702	10.5573	11.2023	10.8527	9.7567	9.3761	9.41513	11.542	11.677	11.677	11.4598	11.4598	11.863	10.5573	11.2023	11.3138	10.1888	11.542	11.2023
CG3788	FBgn0034800	0.209722	0.188173	0.678356	0.760655	0.0401033	0.0243815	1.39682	1.32074	1.20018	0.650676	0.586131	0.763612	0.565764	0.722442	0.663836	1.81122	2.2439	1.78207	1.32608	0.868869	2.06868	3.56011	0.770405	0.519319	0.609911	0.766713
Cht8	FBgn0034580	0.12956	0.138741	0.887529	0.7591	0.255695	0.095925	0.592278	-0.556683	4.52583	4.2633	4.27659	5.54831	4.40502	4.78646	6.34882	4.33746	4.65673	5.04225	5.53965	5.38957	3.58673	3.60053	4.20841	4.66639	5.46486	5.54931
CG31921	FBgn0051921	0.38329	0.263424	0.416473	0.7588	0.0834466	0.0399513	1.07859	1.58299	1.47869	0.594841	0.463304	0.209644	0.497191	0.407389	0.441551	2.02908	2.3426	2.00567	1.5173	0.810172	2.88692	4.30609	0.0927989	0.366934	0.512731	0.435544
Adgf-C	FBgn0038173	0.00949945	0.0217655	2.0223	0.758546	0.275664	0.102083	0.55962	0.281095	1.61727	1.93879	1.84666	1.33086	1.60866	1.43495	2.93271	2.56891	2.17674	1.51367	1.86374	1.81294	2.25644	1.46671	2.52285	1.62561	1.8827	1.81122
CG11529	FBgn0036264	0.00566987	0.0149488	2.24643	0.758359	0.376717	0.131436	0.423985	0.207162	3.49919	3.65716	3.27824	3.71634	3.82118	3.47529	4.30325	4.27334	4.13307	4.43127	4.72184	3.90919	3.98972	3.23126	3.8351	4.46796	4.66079	4.20551
LysB	FBgn0004425	0.128168	0.137842	0.89222	0.758156	0.176731	0.0712539	0.752687	0.665927	5.102	6.69555	5.40669	1.41477	1.36205	2.45945	7.20434	5.91907	6.3553	5.75139	5.98095	5.16775	6.06137	6.78856	6.3521	5.36375	6.00126	5.68646
CG10862	FBgn0035455	0.344012	0.248606	0.463426	0.758084	0.0483832	0.0277193	1.31531	1.69079	0.623225	0.732983	0.308543	0.243423	0.118771	0.640108	0.32357	1.66791	1.94752	1.68447	0.940522	0.237736	2.76982	3.9107	0.0565937	0.10119	0.13614	0.291555
CG12448	FBgn0028857	0.292809	0.227572	0.533416	0.757857	0.0640298	0.0333721	1.19362	1.40493	0.96145	0.729667	0.339135	0.172624	0.185262	0.201606	0.381151	1.93383	1.98884	1.26301	1.25652	0.362901	2.38409	3.65437	0.206592	0.153011	0.23956	0.483656
CG32313	FBgn0052313	0.111334	0.125464	0.953372	0.756144	0.00985952	0.00899616	2.00614	1.34719	0.999553	0.206523	0.199531	1.28154	1.54411	1.47472	0.733534	1.41124	1.52926	1.33654	1.42566	0.840481	1.96937	2.8229	0.654907	1.04422	0.772857	1.13446
Adgf-E	FBgn0033952	0.2078	0.187041	0.682354	0.754967	0.037633	0.0233362	1.42443	1.32484	0.458499	0.174217	0.105984	0.0325187	0.0324237	0.0600305	0.106037	1.44602	1.45155	1.03657	0.876993	0.444936	1.60695	3.02306	0.0832084	0.0316753	0.0900869	0.128556
robl37BC	FBgn0028569	0.225321	0.196467	0.647198	0.754227	0.0522615	0.0291106	1.28182	1.27097	0.959865	0.563553	0.242504	0.52709	0.251518	0.521382	0.400347	1.36173	2.26652	1.52026	1.01906	0.29459	1.95868	3.10552	0.514632	0.0989296	0.439418	0.475132
CG6914	FBgn0037172	0.26136	0.214532	0.582761	0.753067	0.110198	0.0492616	0.957826	1.10197	0.612918	0.743049	0.292809	0.0878305	0.0920377	0.20721	0.135337	1.96259	1.81005	1.35864	1.14337	0.247648	1.77159	3.08406	0.0990397	0.176145	0.209767	0.120423
CG14661	FBgn0037288	6e-05	0.000529928	4.22185	0.752206	0.00300288	0.00386464	2.52246	0.462838	6.83842	7.14725	6.93184	6.38477	6.6454	6.54257	7.64761	7.80715	7.71936	7.07003	7.27141	6.72391	7.45519	7.38387	7.46697	6.94871	6.72233	6.85726
CG6761	FBgn0036031	0.073427	0.0940718	1.13414	0.751833	0.0144951	0.0118089	1.83878	1.09414	1.24607	0.621419	1.00742	1.02433	1.11929	0.975626	1.34727	1.69188	2.09126	1.72051	1.27525	1.09274	1.71048	3.16505	1.28181	1.14575	1.12407	1.14438
CG4363	FBgn0034663	0.0881048	0.106954	1.055	0.75141	0.281812	0.103903	0.550041	0.456133	9.28425	8.62976	8.69496	8.59728	8.26067	8.1124	9.08224	9.94781	9.83315	9.7567	9.62161	10.5506	8.82993	9.36863	9.77881	9.00909	10.2886	10.3715
CG31391	FBgn0051391	0.217361	0.192168	0.662818	0.751208	0.0200001	0.0149127	1.69897	1.54686	0.123339	0.35304	0.342941	0.212866	0.187998	0.240555	0.206914	1.42697	1.43906	1.33107	0.83924	0.31573	2.00381	3.20338	0.252716	0.154438	0.36643	0.398989
Ubc84D	FBgn0017456	0.170294	0.16595	0.768801	0.750383	0.0315503	0.0206365	1.501	1.25157	1.99769	1.32538	1.51433	1.45031	1.58416	1.35442	1.82814	2.53432	2.72608	2.13049	1.97457	1.21882	3.03507	4.10176	1.45528	1.45003	1.22279	1.29526
CG43075	FBgn0262485	0.164209	0.162356	0.784603	0.74834	0.1075	0.0483519	0.968592	0.878593	0.273704	0.623669	0.583208	0.133327	0.142786	0.750362	0.449186	1.75027	1.52614	0.932583	0.612918	0.189109	1.35643	2.59746	0.162467	0.118207	0.10341	0.404661
CG8446	FBgn0034089	2.41e-08	3.00797e-06	7.61798	0.7476	5.85e-09	4.66607e-07	8.23284	0.847306	4.74548	4.60465	4.73385	3.88775	3.80644	3.74373	5.33752	5.54269	5.44658	4.69101	4.69643	4.66702	5.61866	5.44389	5.56335	4.84104	4.80154	4.85485
Mst36Fb	FBgn0261349	0.0817258	0.101746	1.08764	0.747373	0.00969355	0.00889276	2.01352	1.20811	1.15712	1.36867	0.995991	0.812881	1.0657	0.809393	1.48144	2.12572	2.15674	1.84829	1.67037	1.29288	2.41827	3.40318	1.32467	1.27394	1.37577	1.60742
CG14717	FBgn0037938	0.158312	0.158207	0.800486	0.745796	0.0361356	0.0227546	1.44206	1.16924	0.579729	0.33061	0.110295	0.0534657	0.207998	0.223511	0.340668	1.49107	1.42628	1.0633	0.74408	0.277724	1.34768	2.83491	0.345781	0.317111	0.188053	0.196221
CG3939	FBgn0040396	3.91e-06	7.93167e-05	5.40782	0.744514	9.78e-05	0.000335916	4.00966	0.533329	3.18305	3.22198	3.24776	3.06842	3.0634	3.02879	3.71756	4.1017	4.06707	3.90834	3.8682	4.04773	3.80214	3.77341	3.67723	3.7133	3.65043	3.91249
glob2	FBgn0250846	0.300192	0.230532	0.522601	0.743915	0.0759772	0.0374465	1.11932	1.33427	0.987883	0.627491	0.270763	0.0822402	0.0849176	0.300329	0.31573	2.00854	1.79361	1.12845	0.906002	0.433112	2.19769	3.6008	0.0904539	0.160485	0.198707	0.318327
CG42288	FBgn0259184	0.276307	0.221053	0.558608	0.743497	0.0329306	0.021316	1.4824	1.57082	0.818251	0.541114	0.339003	0.224141	0.107244	0.237226	0.167836	1.66218	2.09885	1.43495	0.874589	0.773467	2.39316	3.5999	0.417759	0.203371	0.476235	0.510228
GRHRII	FBgn0036278	0.00141356	0.00534634	2.84969	0.742969	0.722869	0.220113	0.14094	0.0654283	3.49361	3.68645	3.61956	3.03181	3.0344	2.98873	4.84474	4.07023	4.11355	4.01412	4.0298	3.73269	3.74316	3.4065	3.84623	3.64811	3.64293	3.83361
CG30393	FBgn0050393	0.137497	0.144212	0.861707	0.74271	0.00620861	0.00643595	2.20701	1.54539	0.242572	0.570197	0.436371	0.594841	0.588908	0.631579	0.678227	1.51433	1.28471	1.29039	0.871846	0.75168	2.01929	3.21673	0.649296	0.543951	0.50162	0.735692
CG31913	FBgn0051913	0.342633	0.248139	0.465171	0.742672	0.0710722	0.0356656	1.1483	1.48847	0.838141	0.728922	0.458871	0.31634	0.342045	0.124007	0.299549	1.98779	1.96661	1.81212	1.3844	0.672223	2.4805	3.92389	0.0869367	0.229084	0.328579	0.393807
CG9903	FBgn0030756	0.0340273	0.0555166	1.46817	0.742651	0.0828134	0.0397647	1.0819	0.587585	1.96502	2.81589	2.46049	0.789171	0.460493	0.752104	2.83298	3.33725	3.29913	3.05125	2.9945	3.41492	2.85189	2.85219	3.30008	2.61338	3.71252	3.84016
Prosbeta5R	FBgn0034842	0.291077	0.226897	0.535992	0.741161	0.047324	0.0273251	1.32492	1.4828	0.456796	0.447082	0.333095	0.0571974	0.131469	0.0967397	0.216519	1.17998	2.06395	1.16407	0.905703	0.32357	2.11402	3.50872	0.0626267	0.109983	0.098379	0.204226
CG30350	FBgn0050350	0.263861	0.215545	0.578625	0.739054	0.0347074	0.0221466	1.45958	1.5011	0.689702	0.0964263	0.214382	0.0447288	0.0453049	0.116915	0.155302	1.4999	1.56247	1.36675	0.934824	0.42192	1.87487	3.4322	0.196738	0.08833	0.119499	0.198273
CG7778	FBgn0032025	8.89e-06	0.000136453	5.0511	0.738361	0.00503258	0.00555155	2.29821	0.344206	6.29294	6.3468	6.31884	6.19928	6.27842	6.36116	7.15488	7.05393	6.96485	6.99844	6.84461	6.53543	6.64843	6.65087	6.69189	6.85726	6.63349	6.61272
CG43183	FBgn0262812	0.216633	0.191905	0.664275	0.738067	0.0445624	0.0262047	1.35103	1.26932	0.26217	0.390629	0.376293	0.124614	0.278128	0.0971673	0.218564	1.62254	1.40218	1.14044	0.288115	0.252869	1.68301	3.00347	0.150567	0.23916	0.0988184	0.242991
CG7794	FBgn0038565	0.326952	0.241578	0.485516	0.736832	0.0693443	0.0350312	1.15899	1.43786	1.2517	0.543357	0.285075	0.471268	0.546643	0.289034	0.453061	1.70392	2.13365	1.82394	1.15171	0.712351	2.29945	3.86561	0.228651	0.545202	0.671916	0.521325
CG7295	FBgn0031372	0.232519	0.200291	0.633542	0.736397	0.00949339	0.008762	2.02258	1.80524	0.603419	0.697306	0.566673	0.434562	0.133793	0.276819	0.357175	1.61032	2.10909	1.35311	0.739734	0.655688	2.58848	3.77254	0.922084	0.528654	0.9723	0.744372
Eno	FBgn0000579	4.7e-06	8.8458e-05	5.3279	0.735924	1.97e-06	2.22705e-05	5.70553	0.800853	8.89049	8.92421	8.85079	8.09425	8.12918	8.08794	9.36863	9.77452	9.73011	8.89648	8.71744	8.62287	9.76384	9.68369	9.62051	8.56102	8.49297	8.44002
CG8067	FBgn0033891	1.04e-06	3.31045e-05	5.98297	0.734533	2.79e-07	6.46071e-06	6.5544	0.829985	4.22567	4.27024	4.1445	4.37851	4.3052	4.25492	5.07955	4.99027	4.77418	5.06655	5.14565	4.98208	5.12707	4.89654	5.10675	5.35818	5.24538	5.26382
CG13725	FBgn0036708	0.390835	0.26618	0.408007	0.733995	0.106369	0.0478882	0.973185	1.4394	1.33029	0.637315	0.381218	0.0726806	0.0746444	0.118771	0.103376	1.95793	2.48951	1.78886	0.968327	0.439975	2.66047	3.92594	0.0806153	0.219615	0.120828	0.247299
CG15286	FBgn0028531	0.363783	0.2558	0.439158	0.733571	0.0489864	0.0279422	1.30992	1.70199	0.724311	0.489013	0.158217	0.200792	0.172379	0.318212	0.0405057	1.63758	1.89417	1.64577	1.16613	0.295217	2.41427	3.98479	0.0784568	0.0993776	0.177403	0.262188
CG15631	FBgn0031626	0.339782	0.24713	0.4688	0.7329	0.0657292	0.0338521	1.18224	1.49272	0.612918	0.428366	0.432104	0.0652506	0.0298023	0.231453	0.0365058	1.55385	2.08173	1.39078	1.06221	0.570569	2.11963	3.79991	0.0320074	0.129237	0.191225	0.305094
Tengl3	FBgn0051679	0.262143	0.214689	0.581462	0.732131	0.0402232	0.0244255	1.39552	1.43086	0.518393	0.340547	0.202576	0.122253	0.058228	0.142841	0.0784705	1.60196	1.57748	1.07829	0.862386	0.369642	2.0731	3.21881	0.0621874	0.108855	0.19566	0.312585
CG7094	FBgn0032650	0.25764	0.212762	0.588987	0.732129	0.0548074	0.0300564	1.26116	1.31055	0.371705	0.364884	0.209575	0.0433656	0.167586	0.150567	0.0580109	1.50138	1.58316	0.988913	0.625842	0.36348	1.58932	3.24055	0.0479446	0.0417422	0.115954	0.306607
Yp1	FBgn0004045	0.067985	0.0891712	1.16759	0.731824	0.482589	0.160347	0.316423	-0.2644	0.672223	0.573564	0.530048	2.4164	2.39827	2.26178	2.11653	0.551182	1.30359	5.68621	5.97949	4.61332	0.245233	0.219273	0.51813	1.37239	1.32228	1.05916
CG12620	FBgn0032626	0.240899	0.204063	0.618165	0.731812	0.057261	0.0309819	1.24214	1.24724	0.315222	0.545142	0.13373	0.0867963	0.0400275	0.069415	0.0503693	1.47698	1.66218	0.955667	0.798904	0.243032	1.5726	3.06606	0.0971673	0.212351	0.141771	0.148768
CG10014	FBgn0038000	0.109992	0.124535	0.958639	0.730399	0.00230051	0.00322497	2.63818	1.63027	0.947654	0.736386	0.609355	1.98403	1.95868	2.0422	1.33549	1.73992	1.40918	2.23641	1.81847	1.52614	2.37574	3.58325	1.22522	2.13097	2.00381	2.26158
CG32437	FBgn0052437	0.334902	0.245084	0.475082	0.730203	0.0439451	0.0259534	1.35709	1.63586	0.660169	0.423332	0.239352	0.125661	0.13354	0.191633	0.0814929	1.48908	1.94289	1.46862	1.31695	0.538175	2.39041	3.77557	0.0644464	0.210623	0.250153	0.262083
CG11562	FBgn0031247	0.00335835	0.0101518	2.47387	0.72958	0.00117791	0.00202945	2.92889	0.845765	3.53245	3.19048	3.22785	3.45029	3.69142	3.55964	3.8914	4.07695	4.17117	3.93626	3.84256	3.92714	4.27487	4.62842	3.58478	3.98479	3.83228	3.94164
CG15258	FBgn0032563	0.378535	0.261619	0.421894	0.72945	0.102396	0.0464785	0.989717	1.41072	0.85338	0.949279	0.387725	0.0944937	0.22217	0.150373	0.149793	1.91641	2.31253	1.74601	0.943388	0.262153	2.36917	3.94848	0.104893	0.0863163	0.393838	0.249958
Corp	FBgn0030028	0.00110469	0.00448578	2.95676	0.728573	0.0108984	0.00963485	1.96264	0.514315	2.61807	2.44574	2.7633	3.16147	3.74135	3.65163	3.27201	3.51298	3.22785	2.65578	2.77659	2.57506	3.43728	2.92157	3.01121	2.20145	2.4645	2.13315
CG17098	FBgn0032276	0.351166	0.25102	0.454488	0.728571	0.0346158	0.0221029	1.46073	1.78927	0.451156	0.368407	0.400217	0.0247758	0.0245722	0.347548	0.07156	1.60866	1.72527	1.59618	0.899636	0.223373	2.72753	3.80214	0.0579373	0.247906	0.270763	0.295587
CG17375	FBgn0031861	0.273318	0.220166	0.563332	0.727743	0.0462192	0.02686	1.33518	1.40891	0.998117	0.36985	0.226181	0.149088	0.307171	0.402971	0.257254	1.55791	1.96221	1.16718	0.764789	0.643762	1.96753	3.52351	0.32984	0.200073	0.420921	0.308102
CG8306	FBgn0034142	1.73e-07	1.17216e-05	6.76195	0.727329	1.33e-06	1.75991e-05	5.87615	0.601631	5.68308	5.78411	5.71874	5.49886	5.57417	5.64282	6.51932	6.40904	6.43957	6.32138	6.29694	6.02463	6.33404	6.33631	6.32048	6.35653	6.25455	6.35372
boly	FBgn0050362	0.413741	0.274219	0.383271	0.727107	0.054832	0.0300593	1.26097	1.82675	1.06912	0.34119	0.471755	0.0566046	0.130149	0.27109	0.0785529	2.11926	1.86557	1.80703	1.067	0.250798	2.89267	4.32342	0.146227	0.0546794	0.300329	0.752971
CG31204	FBgn0051204	0.394628	0.267328	0.403812	0.726888	0.065368	0.0337782	1.18463	1.66955	1.37577	0.470625	0.228362	0.181972	0.133944	0.248697	0.120237	2.01865	2.11653	1.70356	1.18742	0.521382	2.79514	4.13614	0.152135	0.241952	0.133959	0.246324
CG17564	FBgn0032768	0.376061	0.260608	0.424742	0.726864	0.0852636	0.0405479	1.06924	1.48291	1.40086	0.62969	0.433681	0.240073	0.115335	0.213388	0.18467	2.26541	2.19474	1.60573	1.24714	0.470047	2.783	3.91193	0.218019	0.303211	0.346379	0.690641
CG7557	FBgn0036159	0.369141	0.257811	0.432808	0.725168	0.0500735	0.0283964	1.30039	1.69257	1.02315	0.171294	0.218584	0.163463	0.0463664	0.322998	0.157934	1.76161	1.66898	1.62259	1.11264	0.370573	2.43593	4.0046	0.0501958	0.0433656	0.283189	0.200371
CG11929	FBgn0031620	0.252083	0.20979	0.598456	0.724922	0.0365989	0.0229457	1.43653	1.41684	0.219124	0.10774	0.170091	0.0186378	0.0650189	0.461537	0.0517917	1.29526	1.32467	1.28786	0.628904	0.182292	1.63901	3.08931	0.0191514	0.0810593	0.145633	0.261078
CG31300	FBgn0051300	0.0178699	0.034453	1.74788	0.724308	0.609743	0.192972	0.214853	0.138454	5.29885	5.28722	5.34092	4.46252	4.29265	4.40847	5.62922	6.22493	6.24577	5.98984	5.94094	6.50113	5.14667	5.32212	5.87358	5.57464	6.33253	6.53686
CG10822	FBgn0034478	0.263001	0.215108	0.580043	0.723821	0.0339258	0.0218019	1.46947	1.47507	0.534314	0.327301	0.318812	0.300174	0.169537	0.31497	0.276999	1.64981	1.42508	1.68635	0.753093	0.291795	2.23295	3.18029	0.192398	0.139121	0.399747	0.194413
CG13891	FBgn0035139	0.294777	0.228408	0.530506	0.723319	0.169065	0.068791	0.771946	0.96616	1.29945	0.302955	0.612404	0.0877347	0.300174	0.206471	0.344295	1.98167	2.0588	1.53532	1.26336	0.700155	1.48641	3.39342	0.23346	0.255401	0.209307	0.234878
CG33462	FBgn0053462	0.170567	0.166182	0.768105	0.723312	0.78341	0.234012	0.106011	0.139481	0.0675383	0.0650473	0.0605747	2.05666	3.29735	2.8851	2.20442	0.10119	0.0574818	0.0849176	1.06932	0.272691	0.0481535	0.391595	0.171855	0.303718	0.209214	0.134845
CG30065	FBgn0050065	0.183346	0.174091	0.736729	0.723219	0.0154499	0.0123989	1.81107	1.44454	0.113128	0.10902	0.637858	0.398014	0.358801	0.52709	0.404968	1.39078	1.23392	0.8633	0.534116	0.235795	1.91264	3.00281	0.278186	0.305256	0.312993	0.364884
CG30025	FBgn0050025	0.0273062	0.047318	1.56374	0.723065	0.000445149	0.00103571	3.35149	1.37717	4.05088	3.9186	3.80105	2.51807	1.96802	2.31133	4.79355	4.28764	4.85852	4.46156	4.444	4.62767	5.03717	5.50826	5.35661	4.04773	5.17981	5.32091
CG15577	FBgn0040904	0.291837	0.227057	0.53486	0.722986	0.0549359	0.0300982	1.26014	1.39414	0.594005	0.631136	0.136351	0.141771	0.299656	0.206085	0.247906	1.41237	1.87017	1.38867	1.03881	0.272174	1.88716	3.48575	0.171011	0.125261	0.209125	0.358022
CG34454	FBgn0085483	2.17e-06	5.22437e-05	5.66354	0.722687	3.62e-05	0.000159671	4.44129	0.544564	5.02511	4.95978	4.88158	4.98519	4.90381	4.86852	5.6118	5.67134	5.75139	5.21848	5.29076	5.01965	5.50226	5.36895	5.62896	5.52171	5.27306	5.42772
CG13527	FBgn0034776	0.155509	0.15648	0.808244	0.72256	0.112254	0.0499813	0.949798	0.817048	0.673173	0.151668	0.466204	0.341626	0.0669121	0.10902	0.25617	1.46817	1.73438	1.41426	0.960054	0.370141	1.06375	2.3495	0.328935	0.308543	0.11088	0.0988184
CG12679	FBgn0031103	0.354097	0.251757	0.450878	0.72217	0.0527541	0.0293015	1.27774	1.60986	0.942851	0.611662	0.291827	0.0878134	0.0919382	0.321275	0.13501	1.93723	1.9406	1.70954	0.971592	0.467591	2.53122	3.91101	0.233681	0.175945	0.26056	0.235179
CG5065	FBgn0034145	0.0446435	0.0671331	1.35024	0.721815	0.916557	0.263446	0.0378405	0.0344501	5.31884	4.94227	4.68867	5.08862	5.17155	5.16179	6.59652	5.07399	5.44471	5.57485	5.26218	5.07377	5.00274	4.96483	5.08556	4.73877	5.38434	5.35105
metl	FBgn0035247	5.92e-05	0.0005258	4.22768	0.720625	0.00617948	0.00641727	2.20905	0.395898	3.57638	3.192	3.35087	3.35887	3.4439	3.29324	4.33732	3.96749	3.97631	4.15421	4.19124	4.27965	3.77123	3.5773	3.95841	4.20623	4.23524	4.2468
sut1	FBgn0028563	0.00116834	0.0046781	2.93243	0.720017	0.316326	0.114267	0.499865	0.177995	3.49212	3.49779	3.50978	3.33427	3.39546	3.27036	4.73746	3.83867	4.08361	3.84443	3.78896	3.72948	3.79022	3.45893	3.78453	3.8372	3.83946	3.76848
CG6036	FBgn0039421	0.232785	0.200448	0.633045	0.719861	0.0589484	0.0316208	1.22953	1.19517	0.608961	0.26056	0.537902	0.188278	0.262998	0.178693	0.415335	1.28471	1.86696	1.20855	0.833059	0.412856	1.56944	3.20003	0.22346	0.271984	0.366011	0.26056
CG3483	FBgn0035005	0.358174	0.253358	0.445906	0.719838	0.0635266	0.0331779	1.19704	1.53996	1.02913	0.424862	0.165111	0.0457315	0.103872	0.195095	0.0617164	1.72318	1.99371	1.83906	1.01387	0.431265	2.20884	3.82842	0.201704	0.0438816	0.0810155	0.234116
CG3092	FBgn0034835	0.396397	0.267929	0.40187	0.719746	0.103434	0.0468238	0.985337	1.44224	1.59401	0.237954	0.282754	0.047253	0.10662	0.200038	0.0636272	1.95351	2.25682	1.75618	1.34415	0.522034	2.44946	3.87742	0.114543	0.0452078	0.238003	0.240257
Sfp53D	FBgn0259967	0.325864	0.241181	0.486964	0.717897	0.00546499	0.0058883	2.26241	2.36896	1.29076	1.76569	1.93223	1.03118	0.987679	1.00742	2.45078	2.96153	1.73007	1.34913	2.76246	2.34109	4.44141	5.24813	2.40604	3.22242	3.18531	1.26416
CG10936	FBgn0034253	0.00587018	0.0153212	2.23135	0.716027	0.50171	0.165096	0.299547	0.148418	1.43709	1.58963	1.59092	0.920999	1.0645	0.795799	2.40604	1.99739	2.3623	1.86696	1.85334	1.80144	1.63061	1.14438	2.28791	1.86557	1.70634	1.80144
CG15818	FBgn0031910	0.107744	0.122919	0.967607	0.715891	0.0161489	0.0128343	1.79186	-1.15176	6.05715	5.28291	5.62852	6.63217	5.27387	5.84917	6.24119	6.35023	6.52484	6.42553	6.9352	7.24437	4.31869	4.28764	4.90697	4.94746	6.05136	6.43779
CG5906	FBgn0036217	0.25006	0.208598	0.601956	0.715739	0.0379794	0.0234735	1.42045	1.38052	0.572177	0.272658	0.0743415	0.0789788	0.188844	0.0632239	0.113476	1.43268	1.52024	1.45277	0.938656	0.17847	1.77933	3.07171	0.209696	0.0724319	0.129013	0.162057
VhaM9.7-d	FBgn0038458	0.189574	0.177447	0.722221	0.715703	0.05421	0.0298676	1.26592	1.09802	0.51912	0.431265	0.142763	0.147842	0.156631	0.109119	0.256429	1.12761	1.85622	0.865821	0.854038	0.449129	1.46817	2.74129	0.177744	0.130149	0.21374	0.0989171
CG6971	FBgn0037962	0.231672	0.199818	0.635126	0.715404	0.0285817	0.0191574	1.54391	1.41231	0.886271	0.383213	0.238928	0.457758	0.168211	0.463167	0.528749	1.60535	1.52053	1.43666	0.904918	0.382146	2.12626	3.23781	0.381276	0.322436	0.362786	0.721916
h-cup	FBgn0038334	0.264539	0.215688	0.57751	0.71439	0.0254918	0.0177149	1.5936	1.55606	0.588381	0.0864382	0.19454	0.136675	0.0894058	0.203008	0.050447	1.45155	1.51054	1.21716	0.799307	0.294253	2.17052	3.19913	0.167904	0.212886	0.235739	0.367484
CG8613	FBgn0033924	2.38e-07	1.36e-05	6.62342	0.713771	5.55e-08	1.96746e-06	7.25571	0.814808	5.59998	5.5965	5.49859	5.54597	5.69546	5.62939	6.31922	6.33253	6.18464	6.17265	6.13714	5.96006	6.42415	6.27755	6.43779	6.27942	6.18464	6.12519
CG5506	FBgn0036766	0.0429795	0.0653351	1.36674	0.713335	0.326957	0.117325	0.485509	-0.322145	7.90727	7.56163	7.68387	7.74823	6.8028	7.3384	8.20123	8.70433	8.38722	8.50284	8.5408	8.86497	7.39258	7.09816	7.69559	7.45519	8.78098	8.24986
CG7402	FBgn0036768	0.00102774	0.00428709	2.98812	0.712929	0.0181353	0.0138801	1.74148	0.453032	3.14086	2.95567	2.97675	2.86875	2.81048	2.92663	3.38023	3.8372	3.99465	3.85643	3.89508	3.51491	3.608	3.20187	3.62251	4.00054	3.66147	3.75165
CG18577	FBgn0037870	0.0712481	0.0920069	1.14723	0.712761	0.873949	0.254176	0.0585139	-0.0583758	2.5473	2.43803	2.78931	2.13772	1.59206	1.8868	2.82335	3.36528	3.7243	3.20108	3.13441	3.5748	2.15621	2.23829	3.20503	1.99876	3.27097	3.03667
tRNA:M2:83F	FBgn0011919	0.0584643	0.0804666	1.23311	0.708609	0.88709	0.257087	0.0520323	-0.0491489	0.773468	0.861593	0.756862	1.10569	1.18666	0.609355	2.22088	0.8556	1.44128	1.27848	0.733733	0.586665	0.594723	0.306537	1.34322	1.27568	1.16836	1.5748
Pex11	FBgn0034058	2.48e-07	1.40027e-05	6.60555	0.708411	0.000208245	0.000591455	3.68143	0.358677	4.4135	4.27659	4.48485	4.31033	4.17117	4.24747	5.19371	5.04954	5.05692	4.90594	4.92977	4.89108	4.7986	4.61332	4.83906	4.6628	4.75601	4.79599
gskt	FBgn0046332	0.417751	0.275707	0.379083	0.708203	0.0973207	0.0448482	1.01179	1.51752	0.910982	0.98172	0.559862	0.247512	0.221277	0.282174	0.195818	2.19658	2.18478	1.9531	0.927868	0.472005	2.81031	4.15755	0.0372647	0.149697	0.251294	0.543135
mRpS16	FBgn0033907	1.65e-06	4.40593e-05	5.78252	0.707423	5.19e-06	4.29473e-05	5.28483	0.633043	4.65395	4.50712	4.55038	4.23892	4.31056	4.4033	5.35818	5.13079	5.34476	5.08574	5.07466	4.98426	5.26382	5.04822	5.29854	5.10793	4.98426	4.91231
CG43630	FBgn0263621	0.0795429	0.0997252	1.0994	0.706802	0.162314	0.0666104	0.789644	-0.549361	3.25921	3.39093	3.36965	3.4216	3.00513	3.22739	4.69819	3.84443	3.59757	3.84796	3.41589	4.08681	3.56077	1.9752	2.83573	3.25565	3.15634	3.74021
gom	FBgn0029084	0.204183	0.185057	0.68998	0.706779	0.027476	0.018647	1.56105	1.32041	0.533799	0.240896	0.172874	0.358216	0.243598	0.203371	0.771353	1.05267	1.24388	1.12269	0.758036	0.363364	1.68793	3.10487	0.116012	0.361012	0.127153	0.209214
l(2)k14505	FBgn0021856	5.45e-07	2.16195e-05	6.2636	0.706402	9.85e-05	0.000337916	4.00656	0.418918	4.63682	4.52924	4.55202	3.83616	3.97214	3.84065	5.32638	5.25626	5.25465	5.18401	4.96145	4.99098	4.95967	4.90305	5.11211	5.34975	5.15057	5.18376
ste24b	FBgn0034175	0.138035	0.144617	0.860011	0.706334	0.123727	0.0539437	0.907536	0.735856	1.25166	0.806186	1.03188	1.22903	1.12075	0.968479	1.22056	1.94289	2.04528	1.41523	1.21557	0.86115	1.68532	2.99957	0.612404	0.792376	0.858391	0.809393
CG30270	FBgn0061435	0.289562	0.226439	0.538258	0.705414	0.0508569	0.0286264	1.29365	1.38107	0.939575	0.269428	0.111069	0.117515	0.126022	0.18453	0.20363	1.6669	1.56578	1.23071	0.612436	0.464752	1.9763	3.35075	0.136223	0.105935	0.258795	0.378699
CG8138	FBgn0038122	0.237992	0.202615	0.623438	0.70498	0.0236335	0.0168141	1.62647	1.47054	0.346202	0.367484	0.186696	0.269585	0.202449	0.0675383	0.126022	1.47434	1.41496	1.10872	0.808601	0.286069	1.97591	3.11461	0.221489	0.307833	0.250017	0.224574
fh	FBgn0030092	6.64e-07	2.48629e-05	6.17783	0.704093	5.73e-06	4.5577e-05	5.24185	0.572445	3.92328	3.98942	3.91676	3.82118	3.78728	3.74352	4.7725	4.61048	4.55875	4.6879	4.84236	4.57932	4.43515	4.55437	4.55727	4.7988	4.57932	4.67039
S-Lap5	FBgn0033860	0.354574	0.251898	0.450293	0.703334	0.0479156	0.0275503	1.31952	1.60874	0.615985	0.360188	0.348425	0.209987	0.0625465	0.384666	0.0869189	1.72111	1.62657	1.61369	1.07125	0.285301	2.32932	3.75313	0.0683569	0.121496	0.132152	0.31497
CG17666	FBgn0036311	0.358763	0.253624	0.445192	0.703247	0.0462052	0.02686	1.33531	1.63804	0.666191	0.316577	0.347963	0.224967	0.242429	0.276763	0.0552745	1.48304	1.90215	1.7445	1.09378	0.48704	2.2392	3.87172	0.133944	0.204137	0.271256	0.347025
CG15403	FBgn0031504	0.246606	0.207117	0.607996	0.703099	0.0339018	0.0217924	1.46978	1.38174	0.277981	0.202576	0.364884	0.277355	0.207622	0.0697129	0.13249	1.45441	1.36784	1.02607	0.802191	0.243951	1.7918	3.10096	0.0978984	0.316577	0.371355	0.232292
CG4334	FBgn0038312	0.00640392	0.0163274	2.19355	0.702995	0.711418	0.217271	0.147875	0.0808368	2.01517	2.06545	2.52522	2.2982	2.17578	2.08877	3.08796	2.92376	2.70311	2.93849	2.65423	3.13733	2.45809	1.79789	2.59238	2.49041	2.77587	2.89124
CG15912	FBgn0029712	0.00291356	0.00913928	2.53558	0.702873	0.7524	0.226845	0.123551	0.0609507	2.01625	2.34353	2.24966	1.81729	1.59723	1.7477	2.94741	2.8448	2.92584	2.55207	2.53542	2.38409	2.34641	1.71548	2.7304	2.34353	2.2024	2.32039
v(2)k05816	FBgn0042627	0.0971006	0.114103	1.01278	0.701993	0.315653	0.114067	0.50079	-0.408488	4.71094	5.1557	5.04852	5.25626	4.97691	5.00751	6.81679	5.08163	5.12272	5.69546	5.46178	5.13847	5.05854	4.29426	4.3369	4.60725	4.85108	5.04954
CG9550	FBgn0031826	0.355622	0.252117	0.449011	0.701792	0.0625781	0.0328498	1.20358	1.49934	1.25148	1.03098	0.375332	0.47198	0.29498	0.2033	0.454404	2.23808	2.07069	1.67937	1.37218	0.675137	2.46127	4.17117	0.523363	0.360956	0.331188	0.512731
CG13544	FBgn0034826	0.343569	0.248513	0.463986	0.701321	0.0592682	0.0317331	1.22718	1.48177	0.742404	0.489274	0.289302	0.0479446	0.0489181	0.205603	0.0654201	1.73558	1.82394	1.33974	0.968022	0.195298	2.19474	3.65394	0.117601	0.154969	0.33529	0.356118
CG13244	FBgn0032577	0.348108	0.249928	0.458286	0.701289	0.0842379	0.0402118	1.07449	1.35197	0.521325	0.987394	0.525958	0.240215	0.424798	0.319429	0.184819	2.2684	1.68532	1.69188	0.752971	0.166385	2.23523	3.57857	0.276791	0.214848	0.660611	0.286032
CG14694	FBgn0037845	8.13e-05	0.000655773	4.08991	0.700132	0.0153619	0.0123421	1.81356	0.339293	4.43363	4.57095	4.51894	4.12453	4.19196	4.06468	4.82379	5.41343	5.3867	5.14385	5.12546	5.09131	4.86252	4.76766	4.91123	4.73053	4.65673	4.78571
RpS19b	FBgn0039129	0.20091	0.183328	0.696998	0.699902	0.0302335	0.0200123	1.51951	1.27046	0.387473	0.34156	0.332251	0.461209	0.397441	1.47076	0.640361	1.45003	1.0706	0.982374	0.596787	0.355607	1.72952	2.8851	0.258036	0.284911	0.286671	0.65812
CG17032	FBgn0036547	4.35e-06	8.42099e-05	5.36151	0.699355	6.22e-05	0.000234387	4.20621	0.53206	4.51292	4.29504	4.34477	4.09135	4.21999	4.09619	5.2133	5.0382	4.99929	4.8388	4.82061	4.67687	4.94746	4.79355	5.00788	4.70091	4.45684	4.46332
Ser6	FBgn0011834	0.220282	0.19387	0.657021	0.699202	0.0278466	0.0188362	1.55523	1.35241	4.43515	4.34409	4.60465	3.22785	2.92613	3.59067	3.51799	5.9302	6.0333	5.59209	5.34476	6.13815	5.79322	5.57172	6.07618	4.88066	5.87032	5.47241
CG15035	FBgn0029949	0.206561	0.186324	0.684952	0.698276	0.0546521	0.0299999	1.26239	1.11334	0.54404	0.209838	0.08617	0.0410866	0.0419066	0.212287	0.053495	1.34743	1.53395	0.876333	0.60058	0.251257	1.53532	2.59925	0.0455074	0.0833346	0.149697	0.155441
Ppm1	FBgn0035143	0.34522	0.24901	0.461904	0.697897	0.0390452	0.0239512	1.40843	1.64506	0.612918	0.789323	0.464769	1.40609	0.930606	1.29574	0.270107	1.48971	2.20088	1.84237	1.21701	0.670846	2.62374	3.83779	0.340668	0.588381	0.609355	0.516695
Tsf1	FBgn0022355	0.000756821	0.00340128	3.12101	0.697657	0.0652525	0.0337539	1.1854	0.316194	9.63205	9.81642	9.86426	10.431	10.6038	10.6585	10.6038	10.3418	10.4601	11.0148	10.8729	10.443	10.1411	10.0819	10.0383	11.0401	10.5381	10.5573
CG11672	FBgn0037563	0.20505	0.185454	0.68814	0.697057	0.159492	0.0656682	0.797261	-0.780186	5.58733	5.49079	5.54269	6.60272	5.22533	5.63098	7.36465	5.69546	5.65187	6.12696	6.82125	6.58859	4.15268	4.83022	5.29735	5.4376	6.54415	6.79584
CG4452	FBgn0035981	4.11e-08	4.47937e-06	7.38616	0.694827	4.3e-06	3.76437e-05	5.36653	0.450492	5.2165	5.29149	5.34379	4.65395	4.70715	4.60419	5.98455	6.10173	5.84998	4.80084	4.84703	4.76718	5.77923	5.67386	5.75017	4.87647	4.9683	4.91684
CG15452	FBgn0031130	0.198643	0.182023	0.701927	0.693586	0.0441749	0.0260462	1.35482	1.14582	0.518367	0.250881	0.101268	0.106525	0.250798	0.246827	0.180317	1.30465	1.46631	0.825297	0.394074	0.294072	1.47168	2.7131	0.123188	0.0985554	0.175339	0.472698
CG1444	FBgn0029975	0.0102525	0.0229152	1.98917	0.692871	0.447702	0.151169	0.349011	0.178839	5.85551	5.89174	5.9529	5.97834	5.73712	5.83107	7.2996	6.1337	6.34546	6.2391	6.16337	5.97256	6.25911	5.90535	6.0722	5.85274	6.02463	6.0798
CG14508	FBgn0039651	0.0884411	0.107108	1.05335	0.692712	0.00475762	0.00532599	2.32261	1.2909	0.32264	0.350744	0.285942	0.226256	0.186282	0.386646	0.816068	1.02733	1.19406	1.34505	0.661286	0.525296	1.63844	2.59238	0.601207	0.680211	0.522953	0.827415
Sirt4	FBgn0029783	1.09e-05	0.00015858	4.96257	0.692527	2.9e-05	0.000136511	4.5376	0.625852	4.93432	5.10585	4.79599	4.73164	4.84322	4.66079	5.74718	5.56239	5.60418	5.56153	5.47003	5.26168	5.51515	5.50226	5.69631	5.63421	5.4871	5.52182
CG3687	FBgn0034097	0.291103	0.226897	0.535953	0.692441	0.0638359	0.033297	1.19494	1.27999	0.505156	0.539284	0.228651	0.222325	0.106571	0.301924	0.165415	1.55086	1.63414	1.32318	0.779332	0.220891	1.73478	3.26389	0.114403	0.201704	0.167042	0.506536
CG34355	FBgn0085384	0.000668781	0.00311891	3.17472	0.692353	0.00109919	0.00192089	2.95893	0.649194	1.93879	1.86428	1.77813	1.83002	1.83561	1.71228	2.67381	2.37329	2.61116	3.64535	3.38105	3.26332	2.58634	2.1247	2.81774	3.799	3.60718	3.72574
CG9747	FBgn0039754	0.0616476	0.0833937	1.21008	0.69133	0.45054	0.151824	0.346267	-0.2616	1.86624	1.73848	1.8264	3.24657	3.03507	3.36433	3.5222	2.21655	1.76635	2.28003	2.42552	2.25217	1.3979	1.36162	1.8868	1.9965	2.38345	2.41278
CG14609	FBgn0037483	0.331028	0.243338	0.480135	0.690639	0.0655545	0.0338164	1.1834	1.38141	0.840303	0.642167	0.379798	0.417485	0.304144	0.374837	0.373643	1.97122	1.58932	1.50038	0.914159	0.444751	2.2703	3.62514	0.111069	0.365872	0.271741	0.466717
CG11125	FBgn0033174	0.10763	0.122917	0.968067	0.690401	0.00543032	0.00585974	2.26517	1.34352	1.92825	1.9406	1.73346	2.14817	2.20563	2.27416	1.86624	2.97146	2.83582	3.24882	2.72399	2.5587	3.44323	4.01736	2.17229	2.57744	2.83441	2.72703
CG8768	FBgn0033769	1.63e-07	1.12041e-05	6.78781	0.690313	9.26e-08	2.82866e-06	7.03339	0.726842	6.27755	6.15258	6.26333	5.75017	5.72028	5.61669	6.90512	7.01467	6.84461	6.16268	6.27524	6.14738	6.97053	6.84461	7.05884	6.24119	6.15892	6.12363
CG13204	FBgn0033627	0.00180352	0.00641217	2.74388	0.689839	0.00219656	0.0031255	2.65826	0.670954	2.23481	2.26886	2.20225	2.65728	2.70418	2.61293	2.98068	2.93651	2.85825	2.73184	2.84123	2.73993	3.1288	2.38576	3.20422	3.47648	3.01144	3.2402
CG42850	FBgn0262097	0.350237	0.250725	0.455638	0.689543	0.0329521	0.0213251	1.48212	1.70921	0.367463	0.397189	0.300678	0.0296782	0.0298578	0.160342	0.0367411	1.54908	1.54814	1.26089	0.786403	0.257715	2.44741	3.7133	0.0322435	0.0286789	0.213498	0.183445
CG7567	FBgn0039670	0.225549	0.196572	0.646759	0.689413	0.120616	0.052828	0.918595	0.901578	4.08424	3.94612	3.67317	7.78391	6.31501	6.78856	5.7788	4.15773	3.83524	4.15143	5.14556	5.53821	4.73163	4.50858	5.16805	6.64293	7.71936	6.95718
CG9173	FBgn0035218	0.303136	0.231986	0.518362	0.689033	0.0437457	0.0258942	1.35906	1.44302	0.729766	0.304205	0.160547	0.0257826	0.0568131	0.226705	0.0309869	1.53875	1.69188	1.32806	0.885369	0.410928	2.09126	3.29265	0.139657	0.0533392	0.167768	0.215295
Cyp12a5	FBgn0038680	7.94e-05	0.000644834	4.10018	0.688229	2.71e-09	2.43174e-07	8.56703	1.82386	3.22898	3.18734	3.26585	2.89077	2.73082	2.986	4.01736	4.02214	3.70735	3.40343	3.36286	3.63009	5.03651	4.84914	5.26811	4.94021	4.94366	5.11021
CG6908	FBgn0037936	0.000207098	0.0013027	3.68382	0.686056	3.54e-05	0.000157595	4.451	0.834054	4.37056	4.58039	4.52653	4.38108	4.58171	4.68136	4.88066	5.36895	5.28604	5.28387	5.38434	5.09496	5.3967	5.14909	5.43385	5.33459	5.43958	5.30376
CG4096	FBgn0029791	0.0012322	0.00482589	2.90932	0.685978	0.0279828	0.0188968	1.55311	0.408119	2.29916	2.43191	2.51369	2.04588	2.21753	2.31105	3.14162	3.19018	2.9709	2.81042	2.71925	2.43495	3.06479	2.39827	3.00605	2.85135	2.72753	2.55286
CAH2	FBgn0027843	0.000497837	0.00252654	3.30291	0.685691	0.0323524	0.0210366	1.49009	0.351551	6.6051	6.91419	6.70279	6.40264	6.56733	6.75936	7.20905	7.65968	7.41042	7.45478	7.3614	7.53758	7.10652	6.97905	7.19116	6.89749	7.20905	7.39439
CG14154	FBgn0036093	0.276336	0.221053	0.558563	0.685538	0.0407402	0.0246686	1.38998	1.37806	0.793823	0.549584	0.698239	0.602447	0.437663	0.429936	0.515555	2.0422	1.54051	1.44057	0.975778	0.475923	2.31813	3.4546	0.4031	0.521382	0.689549	0.707498
CG42827	FBgn0262009	0.229842	0.198961	0.638571	0.685069	0.0703674	0.0354234	1.15263	1.0754	1.67037	0.609355	0.903762	0.930292	1.09447	1.27892	0.609355	2.38877	2.24056	1.45723	1.86557	1.47566	1.77112	3.39141	1.24714	1.00919	1.02637	1.32197
CG11726	FBgn0036156	0.122966	0.134128	0.910215	0.684234	0.0203987	0.0151051	1.6904	1.10122	0.0698886	0.0673305	0.22648	0.0659974	0.15749	0.109621	0.377219	1.17031	0.868869	0.947654	0.569128	0.106371	1.14179	2.34716	0.178402	0.200371	0.214245	0.138167
CG34172	FBgn0085201	2.31e-05	0.000263365	4.63639	0.683589	2.19e-05	0.000113305	4.65956	0.687109	7.93716	7.75394	7.82605	5.53744	5.56007	5.5645	8.22789	8.7008	8.63923	7.02794	7.1621	7.15759	8.64895	8.45772	8.4718	7.2834	7.18577	7.20684
CG14898	FBgn0038437	1.87e-05	0.000230367	4.72816	0.682974	1.04e-06	1.53143e-05	5.98297	0.90755	4.31471	4.21254	4.18919	3.72385	3.89325	3.56658	5.01279	4.98491	4.76766	4.765	4.66982	4.58852	5.12527	5.00874	5.30507	5.07653	5.26752	5.09206
CG10561	FBgn0002036	1.28e-06	3.65714e-05	5.89279	0.681814	3.77e-05	0.000163771	4.42366	0.486459	5.51515	5.48031	5.4094	4.97743	5.13993	5.03275	6.22006	6.17265	6.05759	6.08165	5.94265	5.79439	5.91338	5.9772	5.97365	5.74523	5.66532	5.5085
l(3)87Df	FBgn0002354	8.26e-07	2.81842e-05	6.08302	0.681807	2.46e-05	0.000123061	4.60906	0.488039	5.11651	5.06946	4.97927	4.4135	4.47132	4.38536	5.841	5.74523	5.62445	5.37721	5.29329	5.30507	5.43509	5.48064	5.71364	5.56886	5.45356	5.42247
CG11697	FBgn0030313	0.219326	0.193316	0.65891	0.681441	0.0517848	0.0289685	1.2858	1.13526	0.36149	0.249106	0.240733	0.0703502	0.32294	0.0569233	0.0994763	1.5748	1.22138	0.85364	0.828292	0.209187	1.47378	2.70571	0.0776214	0.211217	0.225948	0.345716
CG1443	FBgn0039620	0.00107401	0.00439886	2.96899	0.680928	0.465161	0.155782	0.332397	0.120094	6.07189	6.00401	5.90998	6.32048	6.01214	6.0488	7.09672	6.44479	6.48715	6.38379	6.35372	6.1245	6.07189	6.13714	6.13714	5.95901	6.02787	6.32803
CG5432	FBgn0039425	0.237298	0.202395	0.624706	0.680196	0.0198623	0.01483	1.70197	1.46812	0.285713	0.367866	0.261171	0.186753	0.337913	0.2555	0.254778	1.30074	1.39982	1.13688	0.853597	0.297604	1.91794	3.14211	0.259062	0.16744	0.192457	0.286255
CG9970	FBgn0035380	0.306805	0.233494	0.513138	0.679478	0.0367514	0.022983	1.43473	1.49561	0.225426	0.282862	0.412365	0.126197	0.0387382	0.22217	0.0481824	1.43481	1.47609	1.2914	0.772857	0.127153	2.13328	3.23274	0.0414594	0.112132	0.0673305	0.11319
CG30355	FBgn0050355	0.274643	0.220405	0.561231	0.679422	0.0666663	0.0341396	1.17609	1.19698	2.10025	1.77573	1.91689	1.98545	2.13049	1.68227	1.49251	3.08406	3.25457	2.8755	2.45265	1.81518	3.2198	4.43848	1.72554	1.86696	1.95046	1.70247
CG11983	FBgn0037654	0.00725888	0.0179405	2.13913	0.677997	0.000280221	0.000738197	3.5525	1.06291	0.615667	0.640626	0.85364	0.979511	1.02636	1.23158	1.35805	1.24578	1.54009	1.37966	1.14143	0.857076	1.57329	2.35299	1.37239	1.19319	1.29778	1.20199
CG31344	FBgn0051344	0.000229023	0.00139977	3.64012	0.677659	0.657762	0.204164	0.181931	-0.0594153	3.62187	3.35484	3.42405	3.26933	3.29357	3.11585	4.29312	4.0773	4.06332	3.98504	4.02395	4.06468	3.48084	3.05012	3.69155	3.61865	3.58546	3.58187
CG7311	FBgn0028848	0.395438	0.267581	0.402922	0.676402	0.0438858	0.0259343	1.35768	1.72787	0.796021	0.455543	0.286671	0.116441	0.0251321	0.242429	0.0305364	1.65016	1.88674	1.78029	1.18001	0.439211	2.65423	3.93283	0.134765	0.172153	0.287632	0.417415
l(1)G0136	FBgn0026666	1.55e-07	1.08109e-05	6.80967	0.675308	2.28e-09	2.18229e-07	8.64207	0.982728	6.65957	6.67521	6.6051	6.04497	6.12125	5.98455	7.30931	7.3882	7.26829	7.24575	7.24437	7.06924	7.60251	7.55776	7.7278	7.46423	7.30407	7.33063
CG18193	FBgn0037579	0.397576	0.268338	0.40058	0.674241	0.13896	0.059089	0.85711	1.21819	2.07774	1.46575	1.46324	1.05466	1.0633	1.04604	1.26319	2.79039	2.97589	2.49834	2.03513	1.26416	3.11531	4.74	0.805983	1.17786	1.14575	0.983179
Pbgs	FBgn0036271	0.00754231	0.0183922	2.1225	0.673819	0.825338	0.243191	0.0833682	0.0474012	3.31603	3.09402	3.24863	2.83743	2.84452	2.7131	4.41797	3.43457	3.82759	3.59618	3.63543	3.7918	3.27165	3.02051	3.50872	3.39391	3.66738	3.89813
CG14259	FBgn0039483	2.04e-05	0.000244948	4.69037	0.673347	0.000990025	0.00177785	3.00435	0.431222	5.90304	5.9833	6.06137	4.92391	5.04994	5.09404	6.6454	6.61896	6.7034	6.37724	6.45033	6.12482	6.43091	6.40783	6.40264	6.40476	6.04497	6.03636
dob	FBgn0030607	0.0144268	0.0294424	1.84083	0.67272	0.110226	0.0492616	0.957716	0.406057	3.28439	4.20314	3.60136	3.33872	3.86524	3.33915	4.77418	4.22283	4.11004	5.04404	4.99253	4.69075	4.20931	3.98905	4.10871	4.72285	4.94907	4.77846
CG11362	FBgn0034737	0.0511161	0.0735979	1.29144	0.672246	0.00667779	0.00678214	2.17537	1.0153	0.366277	0.6986	0.529608	0.525362	0.602125	0.515497	0.828292	1.24349	1.53944	0.904918	0.812617	0.487922	1.31968	2.43371	0.886995	0.490572	0.732073	0.782306
Cyp28d1	FBgn0031689	0.000245476	0.00147936	3.60999	0.671517	0.000489514	0.00110264	3.31023	0.61794	6.78199	6.97529	6.87673	6.42906	6.57909	6.70001	7.7902	7.31742	7.54094	7.78009	7.66777	7.55225	7.35164	7.42254	7.71364	8.10692	8.14745	8.37085
CG12158	FBgn0040775	0.000224089	0.0013782	3.64958	0.671507	4.97e-05	0.000201525	4.30364	0.794666	7.08047	6.57159	6.53022	5.50826	5.46445	5.32212	7.34534	7.34139	7.51008	7.40807	7.36967	7.40807	7.47145	7.37777	7.71706	7.59379	7.43304	7.53292
Nup58	FBgn0038722	0.000211405	0.00131929	3.67488	0.671451	0.000435925	0.00102194	3.36059	0.615895	2.87242	2.92376	2.79898	3.65627	3.91883	3.76171	3.59908	3.42565	3.58478	4.22858	4.16067	4.12478	3.24326	3.85695	3.34263	4.16229	4.07712	4.00195
deltaTry	FBgn0010358	0.0429015	0.0652584	1.36753	0.671273	0.00191973	0.00285775	2.71676	1.17187	2.78534	2.42383	2.73479	1.28535	0.976219	0.949279	3.6055	2.95804	3.39424	2.98492	3.05441	3.19512	3.66956	3.91053	3.87948	2.59363	3.8682	3.95386
CG15657	FBgn0034595	0.210142	0.188428	0.677487	0.67099	0.0492579	0.028058	1.30752	1.10836	1.25622	1.22036	1.56911	2.61275	3.1561	2.79829	1.54256	2.53241	1.98368	3.00513	2.57981	2.71986	2.8959	3.55394	0.920912	2.16747	1.93828	2.26049
CG5155	FBgn0031905	0.181281	0.173031	0.741648	0.669251	0.0214975	0.0156592	1.66761	1.24582	0.427639	0.417046	0.397021	0.36699	0.30656	0.494264	0.350341	1.18363	1.71548	1.00697	0.783704	0.305494	1.69169	2.82147	0.466	0.346594	0.32001	0.256367
Ucp4A	FBgn0030872	1.86e-06	4.6924e-05	5.73049	0.669095	1.33e-05	7.8905e-05	4.87615	0.551423	5.97834	5.94471	5.94265	4.91949	5.08952	4.97156	6.45033	6.75496	6.6677	5.71627	5.57973	5.49225	6.57909	6.41494	6.52594	5.55946	5.52935	5.46011
tgy	FBgn0030984	0.0644867	0.0862525	1.19053	0.668619	0.00137624	0.00226853	2.86131	-1.3591	2.35294	2.525	2.31988	2.69835	1.99739	2.25195	3.55604	2.8229	2.82472	3.31726	3.33915	3.25311	0.608961	0.609355	1.90221	1.57736	1.81294	2.18814
CG14482	FBgn0034245	1.37e-05	0.000183034	4.86328	0.668059	1.31e-06	1.74957e-05	5.88273	0.841399	8.32318	8.19297	8.32903	7.00744	7.05393	7.02794	8.71529	9.07849	9.05557	7.73537	7.93363	8.04096	9.17432	9.11281	9.08224	8.34982	8.20523	8.20123
CG8043	FBgn0037610	0.00013714	0.000957931	3.86284	0.668005	9.9e-06	6.52657e-05	5.00436	0.883339	4.61285	4.60435	4.52583	5.42383	5.45165	5.36895	5.29885	5.28014	5.16805	6.27856	6.17912	5.84784	5.37231	5.73846	5.28228	6.49758	6.3553	6.25686
CG13539	FBgn0034833	0.249895	0.20857	0.602242	0.667364	0.0401017	0.0243815	1.39684	1.27018	0.552708	0.262887	0.0716903	0.169388	0.18128	0.0608761	0.294504	1.50065	1.09423	1.05466	0.859174	0.495847	1.55791	3.05488	0.0850244	0.150567	0.376293	0.156255
CG4706	FBgn0037862	0.365517	0.25641	0.437092	0.667261	0.0409494	0.0247458	1.38775	1.62456	0.608075	0.351544	0.173169	0.0476211	0.108583	0.0414062	0.0271371	1.61803	1.4894	1.42477	0.822518	0.253104	2.26976	3.68479	0.0519051	0.205106	0.0837201	0.160547
CG31882	FBgn0051882	0.36427	0.255922	0.438577	0.666091	0.0662147	0.0339708	1.17905	1.42723	0.980488	0.276453	0.471755	0.426353	0.276931	0.244355	0.11631	1.62707	1.98359	1.46712	1.22036	0.655319	2.30229	3.61908	0.0890106	0.297604	0.131576	0.110845
CG3214	FBgn0031436	4.6e-06	8.72686e-05	5.33724	0.66609	2.43e-05	0.000122414	4.61439	0.563032	8.68326	8.72634	8.76462	7.84503	7.96146	7.90727	9.17789	9.59789	9.39671	8.78098	8.74367	8.63923	9.34651	9.24491	9.2719	9.05557	9.00354	8.88587
Gclm	FBgn0046114	9.63e-05	0.000742662	4.01637	0.66573	0.000242663	0.000664268	3.615	0.59904	5.70832	5.96403	5.6509	5.97949	5.85825	5.85138	6.3929	6.54721	6.38034	6.74921	6.6032	6.71631	6.51485	6.25249	6.35304	6.2391	6.62522	6.67521
CG15572	FBgn0029702	0.297192	0.229268	0.526963	0.665714	0.0506118	0.0285573	1.29575	1.32677	0.584863	0.228362	0.0238456	0.113128	0.0874186	0.218145	0.0709381	1.3181	1.44518	1.21142	0.701828	0.271288	1.62008	3.17133	0.0259602	0.0774018	0.137284	0.13378
CG43222	FBgn0262858	0.112742	0.126542	0.947914	0.665046	0.00825568	0.00788085	2.08325	1.22722	2.16716	2.14416	2.01021	1.72585	1.58029	1.85163	2.50454	2.65728	3.15485	2.50764	2.7131	1.96661	3.40766	4.32475	2.27077	1.93457	2.11906	2.1075
CG3306	FBgn0036016	0.367813	0.257261	0.434373	0.664602	0.0607753	0.0322216	1.21627	1.46949	1.05636	0.362165	0.0601271	0.13798	0.149697	0.290244	0.244498	1.58458	1.64338	1.43019	1.05636	0.270763	2.13315	3.6843	0.0696574	0.251257	0.371605	0.218082
CG10845	FBgn0039246	0.327886	0.241862	0.484277	0.663338	0.0352353	0.0223735	1.45302	1.54308	0.567508	0.240073	0.0971673	0.0308171	0.161454	0.215489	0.0383264	1.52614	1.33029	1.23829	1.00381	0.263109	1.94752	3.47085	0.115607	0.133696	0.197369	0.272083
CG43055	FBgn0262357	0.108824	0.123714	0.963275	0.663305	0.144026	0.0607106	0.841559	-0.598492	6.67063	6.62862	6.68082	6.02787	5.43026	5.04275	7.24738	7.59091	7.13169	7.12331	7.24738	7.7278	5.30666	6.24577	6.63217	6.84181	8.10487	7.86072
CG31549	FBgn0051549	2.44e-06	5.7575e-05	5.61261	0.663125	3.44e-05	0.000154099	4.46344	0.508045	3.95571	3.82396	3.75986	4.20509	4.00617	4.10435	4.53169	4.59672	4.4005	4.82595	4.62652	4.64971	4.29358	4.33897	4.43112	4.54706	4.58039	4.73603
CG31010	FBgn0051010	0.328815	0.242199	0.483048	0.662583	0.0617422	0.0325424	1.20942	1.34111	0.699643	0.444986	0.235035	0.0479647	0.0492387	0.0842666	0.0657222	1.59983	1.70186	1.0257	1.07349	0.388813	1.83721	3.44765	0.118126	0.0963157	0.129237	0.109288
KCNQ	FBgn0033494	0.00273521	0.0086774	2.56301	0.66254	0.016537	0.0130524	1.78154	0.490882	3.49137	3.74395	3.40727	2.84749	2.87319	3.00605	4.37107	4.07515	4.18398	4.09116	4.2633	4.251	3.92883	3.87895	4.30745	3.79046	4.52035	4.4135
CG34232	FBgn0085261	0.0375264	0.0592287	1.42566	0.662072	0.257293	0.0963483	0.589572	0.336816	4.6738	4.50594	4.23012	4.22376	3.92289	4.2123	5.3938	4.98068	5.0216	4.9255	5.1545	5.56153	4.62227	4.77684	5.0212	4.48526	5.42051	5.77953
CG15172	FBgn0032740	0.217154	0.192168	0.663232	0.66205	0.0391666	0.0240154	1.40708	1.17627	0.622259	0.681154	0.619937	0.285788	0.0946565	0.761427	0.672115	1.5725	1.66489	0.979911	0.935435	0.476235	1.87278	3.13681	0.442566	0.564459	0.379798	0.401718
CG18628	FBgn0036091	0.760399	0.396921	0.118958	0.661842	0.148141	0.0620715	0.829325	3.27884	7.66351	2.24056	6.95718	1.08382	1.70267	7.37272	1.6787	9.01122	8.15686	9.68369	8.666	8.76182	8.92421	10.6187	7.15488	7.65751	6.6051	6.52053
CG43106	FBgn0262566	0.34321	0.248405	0.46444	0.65959	0.0499947	0.0283841	1.30108	1.45635	0.713042	0.609355	0.19306	0.0864562	0.0891561	0.135963	0.130526	1.83944	1.52426	1.35691	0.824004	0.191865	2.49834	3.28931	0.0968692	0.170683	0.140988	0.35192
Arp53D	FBgn0011743	0.299688	0.230369	0.523331	0.658893	0.015409	0.0123695	1.81223	1.71527	0.174898	0.345042	0.224967	0.100857	0.23884	0.379219	0.294914	1.42137	1.0053	1.40407	0.680211	0.188278	2.32281	3.36328	0.204626	0.199834	0.289034	0.389328
Pof	FBgn0035047	0.217837	0.192325	0.661868	0.657438	0.0187083	0.0142115	1.72797	1.37352	3.01839	3.07053	2.8548	2.79381	2.88348	2.87615	2.85697	3.96289	4.09619	3.81873	3.54138	2.86985	4.46156	5.54831	3.05441	2.80689	2.86013	3.07711
CG3097	FBgn0029804	0.0361769	0.0579365	1.44157	0.657195	0.268153	0.0996612	0.571617	-0.323614	3.8468	3.77701	3.71509	4.31581	4.21274	4.24791	5.28228	3.80625	4.22196	4.10364	4.18505	4.02549	3.3258	3.31035	3.73192	3.52266	3.76733	3.96527
CG8818	FBgn0033751	3.73e-06	7.75354e-05	5.42829	0.656916	5.63e-07	1.01209e-05	6.24949	0.786722	6.46693	6.54257	6.37724	6.16389	6.2391	6.16153	7.13291	7.19664	7.02794	7.31633	7.34534	7.07534	7.24757	7.13733	7.362	7.54844	7.51008	7.35981
CG34021	FBgn0054021	0.165488	0.162839	0.781233	0.65648	0.0208178	0.0153313	1.68157	1.18215	0.21956	0.232746	0.0939591	0.0994473	0.104167	0.230693	0.16051	0.843302	1.51189	0.980794	0.562828	0.401217	1.20175	2.53975	0.35121	0.283849	0.1626	0.203692
Cyp6g1	FBgn0025454	0.00960739	0.0219492	2.01739	0.656479	1.22e-06	1.69234e-05	5.91364	1.90241	6.73798	6.9736	7.13649	6.679	6.59239	6.77224	7.54448	7.59119	7.68184	8.32903	8.33272	8.59728	8.85079	8.64895	9.05557	9.44178	9.66182	10.4678
Klp59D	FBgn0034827	0.381037	0.262561	0.419033	0.656448	0.0428068	0.0254644	1.36849	1.63512	0.369094	0.426215	0.346918	0.0232875	0.0498924	0.262665	0.0282219	1.636	1.44734	1.58195	0.649904	0.16276	2.3845	3.63853	0.0245443	0.157934	0.27477	0.367272
CG14607	FBgn0037488	0.00666069	0.0168304	2.17648	0.656275	1.22e-05	7.41987e-05	4.91364	1.42688	3.91101	4.01681	3.87066	2.34641	2.08841	2.29859	4.1052	4.78252	4.87959	4.09155	4.12903	3.73961	5.25265	5.25763	5.56886	4.69619	4.21471	4.7142
CheB42c	FBgn0066292	4.54e-05	0.000428083	4.34294	0.656274	0.00493266	0.00546864	2.30692	0.363321	4.86056	4.80444	4.7659	3.87066	3.99942	3.72299	5.34295	5.42199	5.63478	5.19371	5.18617	5.07974	5.1601	4.96405	5.3967	4.87811	4.7311	4.81832
lectin-33A	FBgn0040096	0.0232051	0.0418506	1.63442	0.655787	0.00195825	0.0028821	2.70813	-0.993915	3.00302	3.1489	2.97423	3.15279	2.63458	3.03874	3.23702	3.73197	4.12453	3.79618	3.89244	3.85695	2.62597	1.6617	1.85674	2.87639	2.86258	3.1659
CG18317	FBgn0031359	1.45e-07	1.05802e-05	6.83863	0.655508	3.6e-08	1.41605e-06	7.4437	0.743195	7.04616	6.9748	6.96368	5.95763	6.02159	5.89174	7.57177	7.78009	7.5993	6.7915	6.7519	6.6731	7.78009	7.65968	7.77445	6.7123	6.57475	6.59652
Obp99d	FBgn0039684	0.0263904	0.0461696	1.57855	0.654914	0.12409	0.0540265	0.906263	-0.427974	2.52411	3.0778	2.75071	3.39444	3.58067	3.27918	3.10722	4.00098	3.20915	2.58634	2.24071	2.38271	2.54342	2.04672	2.47855	2.83001	2.15578	2.12114
CG17154	FBgn0036246	0.297597	0.229426	0.526371	0.654914	0.0758111	0.0373826	1.12027	1.16881	0.60139	0.257817	0.533285	0.112096	0.259717	0.253686	0.409809	1.2914	1.65602	1.52577	0.643085	0.302026	1.54872	3.22087	0.129316	0.101268	0.316329	0.223117
CG2765	FBgn0035087	0.00448514	0.01244	2.34822	0.653996	0.580431	0.185556	0.236249	0.106541	6.85071	7.00976	6.88889	7.14826	7.04616	6.87729	8.04704	7.47854	7.18577	7.21942	7.14725	7.06465	7.2834	6.95718	6.8284	6.43882	6.61109	6.8284
CG14537	FBgn0031954	0.190828	0.177988	0.719358	0.653794	0.0704699	0.0354625	1.152	0.936097	0.50684	0.295276	0.282597	0.191017	0.0885088	0.199892	0.129589	1.56721	1.3493	0.858717	0.721916	0.290397	1.1858	2.4805	0.226705	0.0782584	0.0701923	0.279172
CG31806	FBgn0051806	0.350259	0.250725	0.455611	0.652949	0.0529455	0.0293833	1.27617	1.4422	1.47991	0.726695	0.437663	0.336341	0.255871	0.590254	0.589916	2.11636	1.89684	1.54697	1.62008	0.631915	2.55399	3.85456	0.562303	0.444961	0.501894	0.619937
fln	FBgn0005633	0.00102215	0.00427129	2.99049	0.652905	1.34e-06	1.76501e-05	5.8729	1.34016	8.18861	7.66351	7.87314	5.34092	5.4376	5.08428	8.28322	8.68546	8.71529	7.41763	7.28503	7.09307	9.35909	9.19912	9.18753	7.23124	7.05955	7.06144
CG15908	FBgn0033085	0.000143322	0.000990898	3.84369	0.652423	0.0063942	0.0065714	2.19421	0.393166	3.86871	3.91736	3.93617	3.69903	3.73497	3.73497	4.75748	4.57793	4.34409	4.48485	4.29358	4.23259	4.41048	4.03639	4.45486	4.44542	4.2184	4.29528
alpha-Est10	FBgn0015569	0.000516099	0.00259025	3.28727	0.652322	0.0189258	0.0143161	1.72295	0.376406	4.0605	4.36061	4.12523	3.79046	3.96998	3.83314	5.20961	4.65278	4.64091	4.66098	4.53553	4.4284	4.64674	4.45203	4.57679	4.47515	4.5519	4.68168
CG12375	FBgn0031987	4.98e-06	9.19044e-05	5.30277	0.651525	0.0194003	0.0145943	1.71219	0.225824	5.04513	5.01058	4.89959	5.13381	5.24974	5.24126	5.80287	5.60474	5.50226	6.0233	6.0488	5.9529	5.26441	5.0459	5.32245	6.00741	6.02717	5.88388
CG14567	FBgn0037126	0.00593101	0.0154052	2.22687	0.651472	0.00357469	0.00436414	2.44676	-0.705111	3.38004	3.51403	3.41323	5.23982	5.70979	5.83576	4.30251	4.13873	3.82047	4.1312	4.23166	4.02515	2.6224	2.45265	3.11692	4.06269	3.64671	3.99527
CG34460	FBgn0085489	0.0606576	0.0825646	1.21711	0.65126	0.0369935	0.0230885	1.43187	0.737932	1.04402	0.812903	0.838887	1.11495	0.927199	0.648477	1.55066	1.30104	1.79789	1.19887	0.739146	0.766494	1.42856	2.53381	0.947232	1.09274	0.765452	1.02002
CG6485	FBgn0036706	0.237291	0.202395	0.624719	0.651071	0.0341311	0.0218984	1.46685	1.251	0.180715	0.355543	0.175945	0.0798553	0.0824896	0.0636821	0.305348	0.987883	1.37218	0.915666	0.651668	0.17957	1.4486	2.92838	0.0882226	0.156044	0.19454	0.308353
CG15483	FBgn0032457	0.145327	0.149321	0.837654	0.64956	0.0332332	0.0214647	1.47843	1.0029	0.346918	0.369094	0.0900194	0.258515	0.27744	0.154353	0.436707	0.968957	1.34905	1.04148	0.671737	0.730421	1.16836	2.45078	0.195581	0.189782	0.0783723	0.255401
CG12983	FBgn0037040	0.341362	0.247804	0.466785	0.649233	0.0363102	0.0228329	1.43997	1.5439	0.44142	0.291555	0.243302	0.0901052	0.0316012	0.157773	0.0678025	1.56578	1.29039	1.365	0.865509	0.187457	2.09233	3.43734	0.0783295	0.195298	0.117429	0.283379
CG12859	FBgn0033961	2.75e-06	6.33148e-05	5.56067	0.648468	1.4e-07	3.90291e-06	6.85387	0.857284	7.50233	7.40065	7.4908	6.46987	6.53663	6.53663	7.90114	8.26067	8.17738	7.27988	7.08607	7.19116	8.32903	8.32903	8.30757	7.3881	7.2996	7.23272
CG31546	FBgn0051546	0.317537	0.238108	0.498206	0.647799	0.0519835	0.0290339	1.28413	1.33983	1.42887	0.75027	0.602784	0.627491	0.601941	0.632383	0.717107	1.80379	2.20442	1.90034	1.44128	0.752971	2.2473	3.80973	0.744372	0.789405	0.721916	0.825297
CS-2	FBgn0029091	0.0290603	0.0494365	1.5367	0.647792	0.163909	0.0671498	0.785397	0.387616	2.65107	2.94974	2.53891	2.09112	1.85622	1.79972	3.09277	3.7918	3.19852	3.2455	3.43813	3.40727	3.01121	3.03181	3.25955	2.86112	3.9305	3.91101
CG14160	FBgn0036066	0.0674688	0.0888381	1.1709	0.647225	0.499081	0.1644	0.301829	-0.224445	2.50011	2.97988	2.46652	1.87823	1.16093	1.75208	3.5043	3.21108	3.17281	3.26389	3.40917	3.35508	2.25614	2.12589	2.89114	2.55527	3.92454	3.5373
CG31910	FBgn0051910	0.278382	0.221928	0.555359	0.646818	0.144004	0.0607102	0.841625	0.890481	0.602125	0.397391	0.44241	0.244287	0.495847	0.176635	0.288057	1.02636	2.06796	0.935435	0.830354	0.654907	1.11803	2.91428	0.0810593	0.220554	0.371328	0.24774
Gfat1	FBgn0027341	0.000112542	0.000834017	3.94869	0.646807	0.00154596	0.00246344	2.8108	0.46875	4.53742	4.34598	4.33746	4.57187	4.18215	4.29696	5.29574	4.97691	4.88863	4.72389	4.78739	4.72108	4.83203	4.78571	5.00937	4.7197	4.57718	4.6601
CG31161	FBgn0051161	0.264806	0.215723	0.577072	0.646742	0.024121	0.0170789	1.6176	1.42615	1.50138	1.1529	0.69117	0.86877	1.14115	0.980794	1.1537	2.01641	2.11557	1.5657	1.39394	1.637	2.69597	3.95637	0.971549	0.931926	1.11403	1.25652
Pka-C3	FBgn0000489	1.66e-08	2.31563e-06	7.77989	0.64674	1.47e-08	8.98085e-07	7.83268	0.653807	5.74052	5.7788	5.62939	5.90535	5.86689	5.89716	6.35304	6.41972	6.31618	5.841	5.87279	5.77493	6.38691	6.29769	6.42553	5.83192	5.77438	5.68308
CG1988	FBgn0037464	0.435839	0.282317	0.360674	0.645871	0.0601326	0.0320405	1.22089	1.66259	1.39078	0.475995	0.623669	0.359182	0.310509	0.554872	0.294778	2.01625	2.11703	1.79163	1.45177	0.63667	3.06606	4.17191	0.240257	0.263214	0.402971	0.406734
CG9921	FBgn0030743	1.12e-06	3.39204e-05	5.95078	0.645516	1.14e-06	1.62051e-05	5.9431	0.644354	7.60985	7.44259	7.50477	6.61356	6.84181	6.72233	8.12114	8.22426	8.14835	8.40184	8.52213	8.37694	8.1124	8.10692	8.27095	8.76462	8.666	8.57828
skpB	FBgn0026176	0.000991388	0.00417957	3.00376	0.645346	1.51e-05	8.70654e-05	4.82102	1.03961	4.62227	4.45174	4.31445	3.13206	3.20003	3.05456	4.6582	5.29735	5.36895	4.52492	4.39184	4.3326	5.52171	5.56335	5.42223	4.27104	4.17252	4.16711
CG12766	FBgn0035476	0.082579	0.102442	1.08313	0.644265	0.4117	0.141272	0.385419	0.289307	4.19299	4.5062	4.30389	3.36823	3.04171	3.30454	5.08574	4.53169	5.31844	5.17826	5.1132	5.40037	4.08037	4.49623	5.2944	4.57679	5.60336	5.77438
CG14277	FBgn0032008	0.000155735	0.00105368	3.80761	0.644207	5.06e-06	4.23202e-05	5.29585	0.924102	5.48652	5.13847	5.16444	4.40248	4.42068	4.41797	5.76771	5.91212	6.04222	5.93574	5.86221	5.7717	6.16874	6.00608	6.38691	6.16688	5.83732	6.03304
Lip3	FBgn0023495	0.316294	0.23767	0.499909	0.644087	0.0788989	0.0384481	1.10293	1.18276	1.24311	1.47168	1.60196	0.963353	1.27473	1.10426	0.479551	2.92602	2.84343	3.04472	2.68071	3.5091	3.31366	1.38004	3.17133	2.58701	3.17577	3.02171
CG12464	FBgn0033861	0.30298	0.23196	0.518586	0.643548	0.0639228	0.0333314	1.19434	1.22019	1.11495	0.30396	0.137661	0.142763	0.151779	0.105822	0.248426	1.41617	1.82263	0.8556	0.838887	0.365698	1.92502	3.11966	0.172465	0.126052	0.107676	0.178402
CG15296	FBgn0030215	0.28758	0.225558	0.541241	0.643458	0.0438421	0.0259245	1.35811	1.30213	0.649523	0.331544	0.0902872	0.096678	0.100211	0.0772938	0.154378	1.47566	1.3717	1.01254	0.582175	0.504653	1.72354	3.14704	0.107168	0.1904	0.228651	0.132727
CG11110	FBgn0034535	1.57e-06	4.25502e-05	5.8041	0.643176	2.72e-06	2.77946e-05	5.56543	0.610203	4.08625	4.16023	4.17352	3.60906	3.67195	3.61905	4.82842	4.87285	4.64825	4.38943	4.26431	4.28387	4.75297	4.69127	4.80636	4.41656	4.11182	4.30631
obst-A	FBgn0031097	0.000741975	0.00336111	3.12961	0.643175	0.00158571	0.00251157	2.79978	0.581634	2.56436	3.06182	2.72097	2.54311	2.55456	2.44698	3.69758	3.36381	3.21529	2.92135	2.69645	2.63224	3.47951	3.40917	3.20338	2.68071	2.525	2.46934
CG5107	FBgn0039342	0.107762	0.122919	0.967534	0.643073	0.263106	0.0981793	0.579869	0.434426	8.64895	9.91602	9.04563	5.99304	5.43986	6.20286	10.0579	9.93679	9.54513	9.62051	9.73598	9.80282	9.22062	9.82899	9.86426	9.11281	10.3862	10.0957
CG6083	FBgn0036183	3.73e-05	0.000375602	4.42829	0.642916	0.000530814	0.00116529	3.27506	0.474829	4.10533	4.25161	3.90098	3.01815	3.01272	3.04047	4.83835	4.75748	4.59083	4.11855	4.11919	3.87606	4.53393	4.60376	4.54471	3.94967	3.69661	3.98137
CG30031	FBgn0050031	0.0454679	0.0678351	1.3423	0.642748	0.000710583	0.00142684	3.14839	1.29971	3.56011	3.2989	3.52499	2.05305	1.66218	1.99601	4.20123	3.79618	4.31483	3.82006	3.83278	4.22606	4.60414	4.88039	4.7986	3.5171	4.78497	4.78084
CG14605	FBgn0037486	0.317876	0.238211	0.497742	0.642532	0.0421853	0.0252136	1.37484	1.40157	0.612468	0.34607	0.336204	0.0872085	0.0904186	0.172379	0.133371	1.36162	1.72734	1.17858	1.0706	0.364233	1.88145	3.38705	0.230956	0.0798553	0.258082	0.233757
CG40486	FBgn0263830	0.0196068	0.0369017	1.70759	0.642387	0.479075	0.15953	0.319596	0.174347	1.60148	1.67485	1.99236	1.04345	0.970887	1.02952	2.77659	2.23523	2.18403	1.59294	1.52024	1.48196	2.04419	1.32358	2.42396	1.66467	1.73212	1.33742
CG7196	FBgn0031944	0.217339	0.192168	0.662862	0.64138	0.0124027	0.0105772	1.90648	1.44757	1.27624	0.976964	0.865821	0.886995	0.96703	0.840397	1.29413	1.81409	1.93494	1.74406	1.44573	0.842447	2.5851	3.77888	1.09775	0.918637	0.806437	0.893932
CG30429	FBgn0050429	0.278389	0.221928	0.555348	0.640637	0.0271836	0.0185122	1.56569	1.4188	0.419019	0.219323	0.0579183	0.0601384	0.0612833	0.0505757	0.0845927	1.14125	1.39232	1.11882	0.785557	0.226899	1.93411	2.9523	0.0662546	0.18638	0.102611	0.250085
CG10253	FBgn0033983	0.102747	0.118829	0.988231	0.64042	0.707087	0.216179	0.150527	-0.139535	2.93852	2.57154	2.67534	3.02051	2.5369	2.65107	4.4005	2.86337	2.8428	2.92005	3.09771	2.96153	2.4254	2.30447	3.03693	2.50819	3.0786	3.14426
ssp5	FBgn0037985	0.488155	0.301661	0.311442	0.637729	0.0580514	0.0312916	1.23619	1.86807	1.01714	0.612468	0.311175	0.0845927	0.0245157	0.326986	0.0709381	2.19671	1.58632	2.09441	1.39232	0.303877	3.18305	4.33603	0.0259111	0.135665	0.203753	0.36103
CG10581	FBgn0037046	0.00195521	0.00679361	2.70881	0.637589	0.117397	0.051702	0.930343	0.272852	3.09402	3.15225	3.15054	3.55179	3.25664	3.49769	3.66516	3.83878	3.80563	3.86359	3.76221	4.08822	3.304	3.1176	3.79377	3.76247	3.819	4.1801
CG11617	FBgn0031232	8.52e-06	0.000132056	5.06956	0.636731	9.22e-06	6.20013e-05	5.03527	0.631739	5.04033	4.99098	4.95655	3.83867	4.13537	3.92505	5.62958	5.7157	5.55278	4.62002	4.73746	4.5301	5.64906	5.49151	5.7425	4.79397	4.73163	4.61332
CG11145	FBgn0033168	0.319594	0.238787	0.495401	0.636552	0.0340955	0.0218826	1.4673	1.46561	0.934824	0.268643	0.365594	0.415335	0.270457	0.80578	0.202935	1.66007	1.61572	1.25945	1.05111	0.755144	1.81122	3.6269	0.527787	0.229194	0.188521	0.233414
CG13032	FBgn0036652	0.336297	0.245707	0.473277	0.63651	0.0311099	0.0204229	1.5071	1.55111	0.68811	0.392978	0.336686	0.360443	0.280984	0.46365	0.295587	1.58632	1.4454	1.52766	0.873954	0.238752	2.217	3.55179	0.302311	0.210187	0.304652	0.364219
CG15136	FBgn0032625	0.162913	0.161343	0.788044	0.635816	0.0281477	0.0189499	1.55056	1.06731	0.308589	0.0724807	0.16311	0.164418	0.0749009	0.278342	0.103774	1.31225	1.03561	0.910982	0.583208	0.168999	1.28154	2.26479	0.199777	0.145825	0.371224	0.353667
CG2871	FBgn0029725	0.320889	0.23941	0.493645	0.635687	0.0312149	0.0204825	1.50564	1.4974	0.25363	0.401783	0.356279	0.205603	0.0983365	0.281994	0.149171	1.538	1.23158	1.01906	0.761927	0.235035	2.04031	3.35887	0.104723	0.086181	0.191786	0.249022
CG4701	FBgn0028868	0.344156	0.248634	0.463245	0.635357	0.0461519	0.0268447	1.33581	1.43446	0.594841	0.535028	0.0949901	0.21992	0.0478963	0.160621	0.063261	1.34449	1.72318	1.12761	1.01082	0.497191	2.11703	3.35989	0.0513304	0.0919382	0.125114	0.171941
CR43975	FBgn0264706	0.212694	0.189727	0.672245	0.634718	0.0353321	0.0224108	1.45183	1.14342	0.656685	0.184757	0.344625	0.321995	0.346498	0.457388	0.508473	1.02383	1.55791	1.09811	0.363806	0.318879	1.71416	2.69211	0.210041	0.786825	0.772857	0.763637
CG11475	FBgn0034687	0.0309104	0.0516028	1.5099	0.634301	0.016762	0.0131433	1.77567	0.720462	0.625842	0.609355	0.586996	0.54739	0.609355	0.635775	1.27892	1.1529	1.29328	1.02618	1.34505	0.706481	1.2657	2.05519	0.66269	0.722255	0.896467	0.772857
bond	FBgn0260942	0.0452333	0.067634	1.34454	0.634114	0.670109	0.207279	0.173855	0.123912	4.88863	4.83594	4.77827	4.52928	4.35988	4.43808	6.26894	4.98566	5.15057	4.84054	4.53983	4.59672	4.90691	5.01752	4.95013	4.35799	4.68933	5.23982
CG32236	FBgn0046793	0.342585	0.248139	0.465232	0.633667	0.0359659	0.0226726	1.44411	1.51422	0.627491	0.476235	0.252716	0.0915333	0.159234	0.145679	0.142027	1.67984	1.43558	1.29502	0.897795	0.306638	2.12864	3.52991	0.240555	0.0842666	0.0748238	0.244745
CG5103	FBgn0036784	0.338124	0.246454	0.470924	0.632916	0.0518336	0.0289847	1.28539	1.36943	0.72263	0.260314	0.213388	0.0617341	0.0285511	0.154204	0.0869189	1.42892	1.57924	1.45588	0.873108	0.429936	1.96553	3.27073	0.0683569	0.0878305	0.0521617	0.196554
CG12992	FBgn0030846	0.293687	0.227793	0.532115	0.632783	0.0521724	0.0290892	1.28256	1.24179	0.724934	0.733513	0.774371	0.764977	0.62855	0.737751	0.438747	1.8927	1.79972	1.75027	0.990747	0.689373	2.10651	3.33872	0.512958	0.576099	0.720071	0.485632
P5CDh2	FBgn0053092	0.355545	0.252117	0.449105	0.632277	0.126616	0.0548287	0.897511	1.08009	1.37681	1.15914	0.982953	1.30074	0.770094	0.979511	0.920999	2.35594	2.1388	1.99567	1.64711	1.3717	2.36568	3.95108	0.44241	0.838311	0.838095	0.930606
CG16716	FBgn0034459	0.374825	0.26015	0.426171	0.632249	0.0660709	0.0339684	1.17999	1.38684	0.963697	0.402971	0.151779	0.184253	0.199654	0.0948702	0.0238456	1.52053	1.87082	1.50331	0.968674	0.46949	1.95453	3.53748	0.186951	0.0863163	0.115751	0.341626
CG17726	FBgn0037880	1.1e-05	0.000159042	4.95861	0.631708	2.91e-06	2.91145e-05	5.53611	0.720381	4.29426	4.42552	4.23973	3.37004	3.56658	3.4587	5.05476	4.93569	4.86418	4.33789	4.08681	3.9865	5.07161	4.95142	5.09762	4.32798	4.22858	4.27104
CG6293	FBgn0037807	7.33e-05	0.000613142	4.1349	0.631577	3.02e-06	2.99025e-05	5.51999	0.87576	6.13007	5.90866	5.86926	5.96539	6.16688	6.12696	6.38379	6.6677	6.75124	6.18164	6.06137	5.88526	6.83561	6.78548	6.91419	6.20822	6.05499	6.03971
CG3301	FBgn0038878	8.37e-07	2.83555e-05	6.07727	0.629584	3.39e-10	6.95296e-08	9.4698	1.26274	6.3553	6.28353	6.19928	5.46965	5.55772	5.45899	6.84485	6.91419	6.96783	6.83842	6.55146	6.58852	7.55225	7.54829	7.52579	7.50233	7.38305	7.39258
CG5823	FBgn0038515	9.57e-07	3.13683e-05	6.01909	0.627941	0.00056254	0.00120838	3.24985	0.319928	4.81485	4.824	4.8025	4.70872	4.61048	4.69205	5.33737	5.53442	5.45338	5.16906	5.17327	5.28329	5.05692	5.29382	5.0504	4.97956	4.82464	4.86252
CG33138	FBgn0053138	1.1e-05	0.000159042	4.95861	0.626	1.05e-05	6.77528e-05	4.97881	0.629027	6.58582	6.48957	6.44059	6.05039	5.82115	5.79322	7.1621	7.05588	7.17599	6.81914	6.51485	6.73611	7.18577	7.02065	7.19664	6.5945	6.52594	6.65395
CR43240	FBgn0262885	0.0205711	0.0382012	1.68674	0.624892	0.765588	0.229706	0.116005	0.0714971	0.592068	0.629437	0.595826	0.530048	1.27596	1.1083	1.6617	0.651988	1.37832	0.919274	0.600029	0.765139	0.616612	0.522034	0.893177	2.09984	2.0517	1.93627
CG8236	FBgn0037626	0.140867	0.146273	0.851191	0.624536	0.0206454	0.0152474	1.68518	1.0552	0.580811	0.411816	0.330585	0.390622	0.388813	0.382354	0.55155	1.35199	1.29328	0.928112	0.561539	0.400347	1.17786	2.67492	0.636028	0.523363	0.624142	0.70634
CG42855	FBgn0262102	0.31076	0.235295	0.507575	0.624521	0.0218032	0.0158552	1.66148	1.55454	0.614439	0.380977	0.151557	0.23272	0.321502	0.266654	0.0979436	1.18155	1.74105	0.986181	0.665142	0.423579	2.11506	3.35402	0.341495	0.272426	0.115607	0.277397
yin	FBgn0015565	0.00071508	0.00327367	3.14565	0.62446	0.0440409	0.0259939	1.35614	0.311515	3.12582	3.27165	3.17713	3.29441	3.52139	3.54944	3.9464	3.96822	3.53336	4.13614	4.122	3.76347	3.57049	3.27718	3.66147	3.84859	3.82945	3.75215
CG42329	FBgn0259229	0.0119656	0.0255521	1.92207	0.624351	0.973729	0.275196	0.0115619	-0.00709723	1.6777	2.14884	2.12114	1.36236	1.8264	1.63678	2.31299	2.93877	2.56897	2.89665	2.50542	2.55105	2.33378	1.63468	1.95793	2.61612	2.79898	2.64957
CG43077	FBgn0262487	0.225345	0.196467	0.647152	0.623886	0.00888651	0.00835526	2.05127	1.52191	0.068638	0.0659974	0.220891	0.218019	0.303041	0.39729	0.0913398	1.18001	0.955839	0.914787	0.471347	0.198316	2.13365	2.61128	0.176329	0.128806	0.162868	0.223117
ND23	FBgn0017567	8.66e-06	0.000133789	5.06248	0.622466	0.000246388	0.000670602	3.60838	0.434025	8.94028	9.00909	8.90811	8.68163	8.76182	8.68326	9.61097	9.69877	9.41513	9.87827	9.98552	9.69877	9.38674	9.3761	9.39671	10.1964	10.0699	9.93329
ana1	FBgn0262167	1.24e-06	3.58606e-05	5.90658	0.622356	8.4e-08	2.71011e-06	7.07572	0.798197	1.44057	1.3673	1.68267	2.03555	2.16279	2.17616	2.20563	2.10992	2.04205	2.21461	2.31197	2.26976	2.29859	2.29487	2.29167	2.4254	2.39955	2.47746
mir-2a-2	FBgn0262460	0.0551859	0.0774146	1.25817	0.622125	0.104897	0.0473741	0.979237	0.513881	4.88952	3.78453	4.40987	4.45174	4.3159	3.8139	5.09521	4.61679	5.23829	4.46711	4.61679	4.85635	4.66414	4.6738	5.28761	5.09122	4.53742	4.70744
CG2021	FBgn0035271	3.15e-05	0.000329075	4.50169	0.621983	6.5e-05	0.000243025	4.18709	0.575499	4.18184	4.07971	4.12478	4.84329	4.61332	4.51337	4.86999	4.69619	4.6861	4.78497	4.91464	4.87472	4.77418	4.52839	4.81026	5.11565	4.89959	4.92872
CG32295	FBgn0260480	0.273915	0.220193	0.562384	0.621885	0.0521594	0.0290892	1.28267	1.16895	0.988913	0.653102	0.51537	1.24714	1.31662	1.17223	0.41745	1.87876	1.72683	1.44734	0.976219	0.623225	1.85754	3.23061	0.576099	0.749545	0.616589	0.689373
CG10834	FBgn0032972	0.172913	0.167779	0.762172	0.620059	0.0256377	0.0177818	1.59112	1.0895	0.451912	0.358022	0.346534	0.725347	0.348678	0.348425	0.512354	1.47609	1.0282	0.617981	0.770137	0.513385	1.43906	2.6224	0.363509	0.744372	0.435544	0.213388
CG30495	FBgn0050495	0.0100028	0.0225377	1.99988	0.619943	0.177155	0.0713447	0.751647	0.291025	2.06744	2.17299	2.12589	1.89969	2.16235	1.90215	3.06126	2.63571	2.52919	2.52736	2.28218	2.1886	2.42265	1.96502	2.85173	2.28218	2.64995	2.58701
CG6481	FBgn0030936	0.339612	0.247045	0.469017	0.619898	0.0545941	0.0299844	1.26285	1.32744	0.724934	0.733513	0.396493	0.431218	0.362376	0.654907	0.155441	1.70165	1.85754	1.1974	0.936672	0.482567	1.92764	3.5091	0.400513	0.46365	0.482317	0.361526
CG6484	FBgn0034247	0.129115	0.138452	0.889023	0.619709	0.0637254	0.0332583	1.19569	0.776624	7.18577	6.46987	6.56403	6.35996	5.9367	6.15266	7.05588	7.57782	7.44509	7.60896	7.46697	8.41435	7.21648	7.53758	7.79549	7.09672	8.38722	8.64217
CG9782	FBgn0030763	0.000574787	0.00281124	3.24049	0.619276	0.0303734	0.0200633	1.51751	0.327844	3.20422	3.23731	3.06955	3.33768	3.15225	3.19277	3.90591	3.50127	3.96174	3.7461	3.60967	3.42246	3.55015	3.26961	3.67485	3.70273	3.51049	3.54245
yellow-h	FBgn0039896	6.09e-06	0.000104652	5.21538	0.618306	0.621733	0.195431	0.206396	-0.0410403	3.61161	3.6812	3.78798	3.57119	3.68544	3.41262	4.33036	4.29451	4.31085	4.13307	4.23973	3.97545	3.67485	3.59314	3.68968	3.98781	3.84859	3.77437
CG33704	FBgn0053704	0.46909	0.294289	0.328744	0.61806	0.15141	0.0630823	0.819845	1.26666	1.68765	0.318746	0.869961	0.847122	0.315096	0.561293	0.144924	2.32932	2.25629	1.29367	1.56944	0.643217	2.6107	3.96289	0.102736	0.266654	0.387876	0.301343
CG42529	FBgn0260434	0.427143	0.279111	0.369427	0.616126	0.0850087	0.0404602	1.07054	1.40715	1.40171	0.365357	0.08833	0.0434937	0.0985554	0.187073	0.058228	1.86743	1.77813	1.73848	1.33086	0.616589	2.31943	3.65219	0.105225	0.305639	0.2771	0.27842
Vha36-3	FBgn0040377	2.11e-06	5.13201e-05	5.67572	0.615514	7.37e-07	1.22613e-05	6.13253	0.680116	5.47626	5.45781	5.42199	5.87032	5.95483	5.77054	6.01603	6.12519	6.06137	6.32657	6.29294	6.25455	6.1245	5.9833	6.28861	6.53912	6.365	6.3553
CG8891	FBgn0031663	0.00198403	0.00686358	2.70245	0.614916	0.867204	0.252639	0.0618787	-0.0267017	3.18734	3.27036	3.06218	3.61247	3.71565	3.64293	4.10927	3.73775	3.51761	3.71053	3.75973	3.63097	3.27429	2.76761	3.39787	3.55964	3.5975	3.61905
Ant2	FBgn0025111	0.296482	0.229018	0.528002	0.614204	0.0462408	0.0268671	1.33497	1.25056	1.80144	1.56093	1.60297	1.6965	1.6692	1.92881	1.38569	2.676	2.74627	2.22088	2.02473	1.82687	3.11313	4.25862	1.34527	1.46967	1.52614	1.8094
CG10202	FBgn0033969	0.294231	0.228022	0.531312	0.61346	0.0397557	0.0242559	1.4006	1.28979	0.561802	0.0964848	0.286429	0.0623617	0.0287173	0.103797	0.243354	1.19189	1.34985	1.18175	0.860553	0.233681	1.73992	3.00496	0.0691997	0.122316	0.105374	0.112433
Mal-A1	FBgn0002570	0.131893	0.140354	0.879778	0.612348	0.359727	0.126724	0.444027	0.360683	9.74754	9.41513	9.55952	9.08727	8.69392	8.7008	9.70613	10.4816	10.3715	10.5573	10.4018	11.1459	9.54336	9.94781	10.3131	9.55952	11.071	11.0148
Sesn	FBgn0034897	1.33e-05	0.000179205	4.87615	0.611662	8.08e-07	1.31825e-05	6.09259	0.80355	6.18998	6.11591	6.14912	6.65087	6.52087	6.38034	6.61109	6.91955	6.75936	6.5116	6.44059	6.40221	7.11558	6.88317	6.86691	6.23514	6.169	6.15832
CG8008	FBgn0033387	3.49e-05	0.000355969	4.45717	0.611116	0.00475609	0.00532599	2.32275	0.330844	3.64156	3.50969	3.48115	3.8397	3.82842	3.93283	4.30493	3.99899	4.16183	4.54676	4.36679	4.29788	3.84058	3.82864	3.95571	4.33603	4.06916	4.36889
CG31533	FBgn0051533	0.356551	0.2527	0.447878	0.60922	0.0392602	0.024042	1.40605	1.4696	0.469682	0.358991	0.0923846	0.0215575	0.102611	0.0791846	0.0609355	1.31097	1.37681	1.21557	0.58299	0.185262	1.97339	3.33427	0.0222036	0.0435715	0.141883	0.0714897
CG4810	FBgn0037994	0.289042	0.226156	0.539039	0.609047	0.0626378	0.0328594	1.20316	1.1267	0.501961	0.243121	0.201952	0.055885	0.0580695	0.0487285	0.0317038	1.50199	1.24048	0.845995	0.518921	0.160298	1.40918	2.856	0.06194	0.0541744	0.123302	0.0861865
Mal-A8	FBgn0033297	0.183948	0.174486	0.735305	0.608684	0.496654	0.163732	0.303946	0.302642	7.18908	7.08946	7.12943	5.89174	5.67857	5.53431	7.02065	8.39176	7.82161	7.86957	7.18577	8.58503	7.27988	7.46423	7.57177	6.7683	7.83128	8.35939
CG11035	FBgn0037544	2.5e-05	0.000277685	4.60206	0.608453	1.99e-05	0.000106409	4.70115	0.62296	5.65453	5.47369	5.35021	4.82479	4.75139	4.8388	6.21347	6.10653	5.98378	5.94866	6.04977	5.90681	6.16337	5.9529	6.23104	6.31388	6.11273	6.16268
CG18336	FBgn0040763	0.161657	0.160434	0.791405	0.608278	0.0144333	0.0117639	1.84063	1.16522	1.85029	1.84829	1.47772	0.997676	1.46206	1.25166	1.6969	2.51807	2.78618	2.29487	1.75603	1.55275	2.7964	3.89022	1.98534	1.47378	1.63414	1.70392
CG10589	FBgn0037035	0.414088	0.274373	0.382907	0.607756	0.0675767	0.0344229	1.1702	1.4432	1.23017	0.735619	1.0745	0.794095	0.363312	0.71352	0.521001	2.20145	2.1411	1.61572	1.40609	0.649038	2.57154	4.22196	0.57638	0.485646	0.484909	0.776235
CG43448	FBgn0263402	0.0512209	0.0736824	1.29055	0.607119	0.00941565	0.00871017	2.02615	0.865523	2.35145	2.13221	2.25333	2.35294	2.26636	2.63621	3.01121	2.50542	3.04171	1.84552	2.9116	2.64387	2.82147	2.92663	3.58546	2.23853	1.6508	1.86921
CG15705	FBgn0034104	0.378601	0.261619	0.421818	0.607099	0.1002	0.045783	0.999132	1.18276	1.30089	0.453431	0.319361	0.159127	0.324665	0.222524	0.277893	1.58195	2.03513	0.959865	0.886995	0.54172	1.90057	3.52853	0.192866	0.139578	0.227005	0.374649
RpL22-like	FBgn0034837	0.179607	0.17197	0.745677	0.606878	0.0812008	0.0392524	1.09044	0.810679	0.28921	0.362863	0.303877	0.108223	0.0504814	1.30359	0.714261	1.16836	0.893964	0.649038	0.206671	0.126942	1.31097	2.02256	0.0544518	0.302955	0.440864	0.321275
CG42848	FBgn0262095	0.411525	0.273362	0.385604	0.606789	0.0725147	0.0362307	1.13957	1.40408	1.02637	0.651993	0.424862	0.272226	0.205283	0.0685513	0.129049	1.7577	2.03684	1.60032	1.14044	0.535576	2.35935	3.73039	0.22572	0.248484	0.367484	0.431265
CG15579	FBgn0040906	0.0917379	0.109825	1.03745	0.606131	0.0197748	0.0148062	1.70389	0.888639	1.04604	0.479481	0.454968	1.03239	0.829603	0.842447	1.01055	1.13688	1.65144	1.12007	1.11403	1.02222	1.32959	2.49698	0.819833	0.72407	0.812925	0.752511
CG7394	FBgn0036173	4.4e-07	1.85517e-05	6.35655	0.606102	4.36e-07	8.51662e-06	6.36051	0.606634	5.32762	5.31338	5.38372	5.00937	5.23982	5.10675	5.94094	5.99527	5.90681	5.55631	5.71364	5.53885	5.97979	5.87358	5.99125	5.8118	5.71141	5.69252
CG11598	FBgn0038067	0.453178	0.288892	0.343731	0.605638	0.000388854	0.000939871	3.41021	3.79972	0.0517671	0.188053	0.0476533	0.178113	0.249783	0.169705	0.0666147	1.99239	0.0453812	0.787959	2.31943	1.93879	4.32798	5.13211	2.22655	2.86875	2.77022	0.81087
l(2)tid	FBgn0002174	1.11e-06	3.39204e-05	5.95468	0.60493	4.8e-06	4.07777e-05	5.31876	0.525054	4.99686	4.95943	4.92012	4.86797	4.97439	4.82914	5.55863	5.55772	5.57485	5.84784	5.73741	5.58684	5.46445	5.56889	5.41823	5.63804	5.43861	5.50405
CG31099	FBgn0051099	0.262309	0.214721	0.581187	0.604928	0.0378087	0.0234077	1.42241	1.20026	0.67336	0.0944937	0.210654	0.157934	0.275929	0.115293	0.151315	1.15195	1.49002	1.18517	0.662378	0.412794	1.3493	2.88614	0.343834	0.234878	0.194853	0.222524
CG31347	FBgn0051347	0.0882071	0.107023	1.0545	0.604708	0.0240084	0.0170207	1.61964	0.841374	1.538	1.41325	1.5649	1.62662	1.79664	1.96753	2.00854	1.83561	2.48612	1.92125	1.33029	1.54814	2.38745	3.1447	1.50813	1.70496	1.78886	1.38101
Gld2	FBgn0038934	0.318455	0.238298	0.496952	0.604505	0.033646	0.0216437	1.47307	1.39264	0.176549	0.280869	0.169705	0.0891901	0.0348058	0.568882	0.0265408	1.20454	1.20956	1.09378	0.54172	0.129316	1.78029	3.00142	0.0233347	0.178402	0.167257	0.30084
CG14668	FBgn0037320	0.295883	0.228741	0.52888	0.603976	0.0468766	0.0271158	1.32904	1.22394	0.641412	0.138283	0.210984	0.0609058	0.14385	0.102315	0.08617	1.39982	1.31662	0.85364	0.768552	0.361327	1.47399	3.02512	0.163391	0.294846	0.205283	0.091873
CG11663	FBgn0029539	0.390699	0.266177	0.408158	0.603935	0.0718357	0.0359483	1.14366	1.33885	0.987679	0.54172	0.0966545	0.224493	0.242016	0.0824896	0.168211	1.52046	1.74919	1.43977	0.639825	0.362824	2.02388	3.50339	0.115335	0.0941642	0.239352	0.14033
Ahcy89E	FBgn0015011	7.71e-05	0.000632654	4.11295	0.60367	0.000830365	0.00158112	3.08073	0.455621	4.07341	3.83361	3.99138	3.86561	3.78583	3.74489	4.5121	4.57619	4.62111	4.52246	4.63213	4.58596	4.33732	4.26928	4.65866	4.6033	4.40126	4.73053
CG13738	FBgn0036390	0.0345266	0.0560612	1.46185	0.602879	0.219408	0.0847021	0.658748	-0.32773	2.1317	2.04326	2.30447	2.18814	2.44997	2.37406	2.83124	2.81786	2.63897	1.77112	2.04205	2.1893	2.17208	1.07221	2.25195	2.42495	2.04205	2.04326
CG12269	FBgn0038665	2.02e-05	0.000244365	4.69465	0.602741	0.046725	0.0270603	1.33045	0.197738	3.9973	4.06867	3.95328	3.64979	3.71558	3.77489	4.64674	4.73877	4.44196	4.37161	4.41225	4.38287	4.27188	3.98592	4.35466	3.81431	3.70065	3.77731
CG32732	FBgn0052732	0.000136436	0.000957243	3.86507	0.602041	0.00417651	0.00487502	2.37919	0.386029	4.34364	4.53818	4.44418	4.78351	4.94366	4.85635	5.04954	5.21668	4.86591	4.66136	4.70456	4.461	4.97481	4.75349	4.75579	4.75332	4.59536	4.41797
CG2014	FBgn0039669	0.250452	0.208836	0.601275	0.60196	0.0899238	0.0421636	1.04613	0.919418	0.206821	0.321925	0.311753	0.0936157	0.0977979	0.339126	0.147003	1.34857	1.15081	0.94607	0.386487	0.0749519	0.917194	2.57744	0.10412	0.185262	0.152976	0.36699
CG34026	FBgn0054026	0.166163	0.163378	0.779466	0.601259	0.166937	0.0681376	0.777447	-0.60007	7.21648	7.2953	7.08946	6.54923	5.61669	5.78411	8.53219	7.41763	7.45519	7.08444	7.59091	7.90114	6.19977	6.69189	6.90937	6.13176	7.40065	7.39982
CG14483	FBgn0034248	1.33e-06	3.73254e-05	5.87615	0.600171	6.59e-06	5.05955e-05	5.18111	0.51386	7.03557	6.87729	6.96667	6.7837	6.67991	6.70279	7.50293	7.5993	7.57782	7.29009	7.51858	7.54094	7.53292	7.40065	7.48755	7.70673	7.73537	7.59091
ttm3	FBgn0032971	0.366155	0.256623	0.436335	0.599428	0.0411647	0.0248218	1.38548	1.45957	0.673371	0.351324	0.12492	0.129413	0.138097	0.23916	0.0833346	1.3979	1.46666	1.46666	0.857044	0.25985	1.99474	3.378	0.155582	0.114543	0.101239	0.169705
CG2183	FBgn0033273	4.31e-05	0.000414639	4.36552	0.598917	4.22e-06	3.70564e-05	5.37469	0.758941	3.22043	3.01051	3.28612	3.0634	3.192	3.1272	3.73445	3.96071	3.61865	3.35315	3.19356	3.13541	3.94122	3.80678	4.04588	3.49757	3.44612	3.47513
CG31871	FBgn0051871	0.066627	0.0880966	1.17635	0.596065	0.883517	0.25631	0.0537851	0.0442266	0.551693	0.567305	0.864524	0.631579	0.629654	0.640466	2.0588	0.656561	1.05636	1.50181	1.17128	1.71047	0.525638	0.451912	1.13865	0.85437	0.708697	0.968327
CG9231	FBgn0036887	1.51e-08	2.17022e-06	7.82102	0.595726	2.5e-08	1.12165e-06	7.60206	0.569603	7.32301	7.18577	7.27034	6.27856	6.42283	6.29196	7.85187	7.90727	7.80715	7.61648	7.631	7.55974	7.85707	7.79237	7.83849	7.79237	7.74823	7.70673
CG31327	FBgn0051327	0.326262	0.241293	0.486434	0.595724	0.0407035	0.0246524	1.39037	1.33468	0.366178	0.25617	0.0678168	0.0983365	0.021235	0.174795	0.0256441	1.09306	1.35864	1.04202	0.684519	0.133793	1.61076	3.06126	0.0221933	0.0208108	0.0402965	0.117839
CG6231	FBgn0038720	2.47e-05	0.000276947	4.6073	0.595397	0.0369163	0.023049	1.43278	0.211156	4.1419	4.12078	3.94741	4.11855	4.10721	4.05294	4.82914	4.60435	4.56279	4.33876	4.43414	4.20551	4.28527	4.13438	4.42391	4.14079	4.05205	3.99287
CG9400	FBgn0030562	0.00874931	0.0204417	2.05803	0.59483	0.0789066	0.0384481	1.10289	0.365341	3.52266	3.47322	3.53441	2.73514	3.15634	2.78432	3.94122	3.84703	4.52653	3.42507	3.52266	3.38764	3.87324	3.55184	4.20123	3.25896	2.96613	3.22785
CG9392	FBgn0036895	0.314677	0.23705	0.502135	0.594722	0.0329662	0.0213294	1.48193	1.36533	0.799457	0.308102	0.275662	0.265821	0.249279	0.268393	0.310509	1.4242	1.43268	1.36917	0.869961	0.53816	1.85622	3.29762	0.325367	0.286105	0.387347	0.280096
CG2371	FBgn0030323	1.12e-05	0.000159042	4.95078	0.594491	5.47e-05	0.000213988	4.26201	0.503684	2.56531	2.44403	2.64778	2.69184	2.73961	2.66768	3.2052	3.01272	3.22268	2.91323	2.97423	2.88692	3.03302	2.89734	3.23781	3.22898	3.09101	3.18029
CG2034	FBgn0015359	9.35e-05	0.000726979	4.02919	0.594382	0.00822911	0.00786071	2.08465	0.327321	3.71656	3.76653	3.70173	3.71083	3.6601	3.59459	4.45958	4.27965	4.22873	3.95181	3.9691	3.72137	4.07894	4.26025	3.82759	3.80342	3.69011	3.59385
CG1600	FBgn0033188	0.0526853	0.0748875	1.27831	0.593963	0.0183704	0.0140104	1.73588	0.753505	5.79534	5.96574	6.0988	6.16874	6.32311	6.17912	6.54257	6.3521	6.7471	6.5349	6.53022	6.67787	6.43688	6.82328	6.86024	5.85064	6.1533	7.26606
CG15362	FBgn0031378	0.0124578	0.0263422	1.90456	0.593719	0.00707549	0.00707408	2.15024	0.655303	2.95932	2.64856	2.8287	3.01316	2.83662	2.81823	3.21881	3.66354	3.33539	3.20837	2.90324	3.15634	3.55467	3.91944	2.92838	3.1272	3.18248	3.13012
Ntl	FBgn0031934	0.258235	0.212863	0.587985	0.593126	0.0897733	0.0420999	1.04685	0.922242	0.661407	1.0391	0.887218	0.365318	0.519319	0.346498	0.881431	1.89475	1.59092	1.24725	0.825822	0.597945	1.66007	3.19277	0.50162	0.34314	0.316329	0.387167
CG30156	FBgn0050156	0.210287	0.188501	0.677188	0.59302	0.0224148	0.0162	1.64947	1.1735	1.04267	1.37091	1.2213	1.30585	1.29778	1.17786	1.42892	2.0731	1.91192	1.99239	1.41523	1.15712	2.46665	3.54758	1.14115	1.21153	0.886995	1.06297
CG18731	FBgn0042213	3.67e-07	1.67368e-05	6.43533	0.592806	0.541498	0.175771	0.266403	0.0373429	4.61888	4.60538	4.6628	4.73053	4.62932	4.63021	5.30479	5.12707	5.23361	5.07114	5.06122	5.15191	4.64194	4.59428	4.76286	5.0634	4.88039	4.91464
CG7140	FBgn0037147	0.404247	0.271086	0.393353	0.592073	0.0598684	0.0319294	1.2228	1.42289	0.71352	0.439418	0.248471	0.0608429	0.226181	0.285788	0.034183	1.55139	1.59206	1.39982	0.967479	0.320885	2.16415	3.47545	0.030494	0.625781	0.417415	0.195204
Adh	FBgn0000055	0.0608742	0.0827508	1.21557	0.591914	0.267218	0.0994295	0.573134	0.332996	2.60087	2.65317	2.8755	1.35562	2.30278	1.92385	3.3584	3.44567	3.1012	2.9709	3.02306	2.17856	3.10072	2.81779	3.21	3.14632	3.30379	2.47925
CG9316	FBgn0032878	0.243798	0.205732	0.61297	0.59184	0.0433492	0.0257337	1.36302	1.09034	0.387167	0.178848	0.121602	0.126787	0.134937	0.12353	0.144283	0.973025	1.34583	0.877323	0.612918	0.293471	1.22145	2.63458	0.102611	0.112352	0.100167	0.22711
CG4409	FBgn0034128	1.02e-05	0.000151179	4.9914	0.591602	1.36e-05	8.01877e-05	4.86646	0.574408	1.98032	2.09336	2.06185	2.48095	2.28411	2.43609	2.68162	2.71126	2.51747	2.86603	2.73284	2.62231	2.59389	2.53542	2.72945	2.93919	2.79381	2.74471
CG1814	FBgn0033426	1.11e-05	0.000159042	4.95468	0.591372	2.66e-05	0.000129458	4.57512	0.540448	6.13604	6.03636	6.13815	6.03702	6.01301	5.91064	6.67688	6.81126	6.59652	6.4856	6.42825	6.35304	6.7034	6.44479	6.7837	6.3884	6.28837	6.24341
CG12289	FBgn0036160	0.384714	0.263943	0.414862	0.588484	0.0613408	0.0324136	1.21225	1.3463	0.673989	0.275508	0.211098	0.0439172	0.0448403	0.0390217	0.0591043	1.0706	1.79634	1.37577	0.75608	0.18063	1.85461	3.29613	0.0487519	0.0874186	0.11706	0.131684
CG14757	FBgn0033274	4.51e-06	8.59048e-05	5.34582	0.58821	0.0017725	0.00269863	2.75141	0.29915	8.45772	8.55739	8.43515	7.40807	7.52395	7.40065	9.13427	9.11696	8.96367	9.32072	9.41513	9.10065	8.77626	8.72634	8.84513	9.19912	9.10841	9.10065
CG17217	FBgn0032419	0.0910184	0.109177	1.04087	0.588183	3.86e-06	3.51864e-05	5.41341	2.55414	0.2369	0.104461	0.426353	0.389978	0.505156	0.396421	0.393838	0.936672	1.20175	0.89747	0.844251	0.425547	2.63065	3.69011	2.10936	2.09126	1.94113	1.96221
Crtp	FBgn0029501	0.377507	0.261295	0.423075	0.587793	0.0426463	0.02539	1.37012	1.45428	0.532716	0.405813	0.102463	0.107604	0.0853776	0.0870605	0.119362	1.33974	1.34527	1.40778	0.866052	0.146174	2.07175	3.30694	0.0251321	0.0992676	0.177116	0.266711
CR32835	FBgn0052835	0.350728	0.25086	0.45503	0.587647	0.03684	0.0230227	1.43368	1.4211	0.110897	0.609355	0.304652	0.108583	0.0509142	0.130433	0.0689393	1.57748	1.14143	0.870421	0.600268	0.0869012	2.1075	3.12552	0.0551917	0.0487715	0.215454	0.36348
CG18327	FBgn0033904	0.00190735	0.00665658	2.71957	0.587626	0.002002	0.0029243	2.69854	0.58364	2.30123	2.56626	2.59377	1.82484	1.5186	1.80983	2.99072	3.01144	3.22198	2.60394	2.95292	2.98173	3.23834	2.7905	3.18334	2.38576	2.59641	2.67558
CG14132	FBgn0040817	0.0115076	0.0248215	1.93902	0.587625	0.712624	0.217617	0.14714	-0.074402	4.32386	4.52516	4.2475	3.63495	3.87742	3.84796	5.5161	4.79397	4.54933	4.44542	4.47515	4.47246	4.20046	4.1075	4.56536	4.13558	4.09601	4.09021
snoRNA:Me28S-U1230	FBgn0086031	0.12194	0.133474	0.913854	0.587554	0.774298	0.231767	0.111092	-0.103552	0.931926	1.03561	1.12686	2.0731	1.3237	1.50997	2.51474	0.971407	1.37091	1.75226	0.986161	1.04885	0.8633	0.609233	1.31121	1.0568	1.12729	1.26438
CG4955	FBgn0030814	0.374574	0.260072	0.426462	0.586608	0.112489	0.0500293	0.94889	1.0893	0.83924	0.400347	0.106548	0.113361	0.298775	0.205562	0.0418309	1.46381	1.60032	1.3827	0.869988	0.471593	1.3673	3.21019	0.0365581	0.147913	0.250659	0.15439
Cat	FBgn0000261	8.85e-05	0.000697247	4.05306	0.586579	0.0528874	0.0293624	1.27665	0.218229	8.03109	8.13401	8.22789	8.70433	8.7008	8.72806	8.98283	8.58135	8.58854	8.76182	8.61661	8.68546	8.4242	8.27987	8.34361	8.57475	8.50584	8.77626
CG14270	FBgn0029665	4.04e-06	8.11913e-05	5.39362	0.586531	8.61e-07	1.3735e-05	6.065	0.680245	4.36262	4.12523	4.15773	4.02655	3.98504	3.92454	4.88933	4.7477	4.76815	4.79355	4.7406	4.58316	4.92577	4.89558	4.86498	4.9935	4.82595	4.79915
CG14742	FBgn0037997	0.000662301	0.00309783	3.17894	0.586437	0.0689956	0.0348894	1.16118	0.25722	6.78695	6.39943	6.32803	6.40351	6.16078	6.48022	6.9352	7.27034	7.06818	6.96368	6.99844	7.19577	6.81419	6.6454	6.82647	6.61109	6.49096	6.46434
CG43069	FBgn0262479	0.32753	0.241741	0.484749	0.586029	0.0325228	0.0211139	1.48781	1.38742	1.12729	0.530048	0.359373	0.619937	0.560257	0.676633	0.887712	1.24735	1.63974	1.40663	1.00919	0.130112	2.08351	3.52703	0.568448	0.306607	0.687513	0.346357
CG33282	FBgn0053282	0.223489	0.195377	0.650744	0.585517	0.190845	0.0755249	0.719319	0.63237	1.20199	1.61661	1.17223	0.621387	0.609355	0.746904	0.605591	2.53381	2.60799	2.15891	2.37229	2.47115	1.88674	1.5416	2.45961	1.90271	2.91592	2.64778
CG34120	FBgn0083956	2.55e-05	0.000281918	4.59346	0.585376	0.000225237	0.000629749	3.64736	0.460643	5.19923	5.16418	5.01119	4.98208	5.12951	5.0611	5.75017	5.66532	5.71525	5.82115	5.62535	5.40837	5.6477	5.53885	5.56998	5.59998	5.42772	5.47855
CG31803	FBgn0051803	0.195761	0.180776	0.708274	0.585157	0.0239974	0.0170182	1.61984	1.10291	0.586996	0.931938	0.590729	0.568882	0.591325	0.536526	0.74922	1.55195	1.56396	0.930176	0.965938	0.431216	1.96829	2.85301	0.597087	0.520984	0.609355	0.600331
CG17036	FBgn0032449	0.0698765	0.0907495	1.15567	0.584761	0.39997	0.137923	0.397973	-0.25644	2.07013	2.48991	2.38911	1.88752	1.63974	1.74755	2.99917	2.71108	2.99319	2.22319	1.83617	2.28726	2.11619	1.41257	2.65107	1.37091	2.26479	2.17052
CG1908	FBgn0030274	1.13e-06	3.39204e-05	5.94692	0.584708	6.92e-06	5.2153e-05	5.15989	0.490492	3.98751	3.76776	3.9504	3.96822	3.97718	3.89325	4.58517	4.47338	4.40126	4.09757	4.02534	4.08056	4.40748	4.28199	4.48768	4.04601	3.97545	3.98736
Vha68-3	FBgn0032464	0.452822	0.288743	0.344072	0.583552	0.0709925	0.0356381	1.14879	1.4898	1.08554	0.382146	0.331122	0.334244	0.367866	0.318327	0.0682936	1.7477	1.73346	1.8841	0.987522	0.545441	2.28398	3.8591	0.125114	0.187457	0.234409	0.185155
CkIIbeta2	FBgn0026136	0.295544	0.228703	0.529378	0.581606	0.0551231	0.0301719	1.25867	1.12957	0.332428	0.682811	0.178113	0.178538	0.19454	0.35121	0.116512	1.42508	1.39658	1.18345	0.62313	0.514632	1.77224	2.72076	0.0890456	0.387257	0.245091	0.31444
CG18568	FBgn0033888	0.382838	0.263228	0.416985	0.581449	0.0556742	0.0303579	1.25435	1.35987	1.67201	1.51516	1.45366	0.897795	0.89747	1.10295	1.25376	2.47115	2.66027	1.94542	1.4486	0.927199	3.20956	4.4171	1.09378	0.936672	0.828174	1.02297
CG43120	FBgn0262580	0.101989	0.118067	0.991447	0.580464	0.382816	0.133127	0.41701	0.296974	2.47085	2.2457	2.17788	2.0854	2.15774	2.06395	2.09013	3.4479	3.09779	3.43149	3.52621	4.06707	2.61923	2.42495	2.74117	2.65423	3.45906	3.70332
CG43290	FBgn0262982	0.203746	0.184733	0.690911	0.580334	0.0905679	0.0423687	1.04303	0.794538	0.349764	0.372858	0.363031	0.115293	0.122847	0.0914744	0.198886	1.5254	1.10237	0.795799	0.695637	0.0910718	1.13336	2.20225	0.133657	0.225485	0.253686	0.157128
CG32181	FBgn0052181	0.444945	0.286125	0.351694	0.579784	0.0617275	0.0325424	1.20952	1.51243	0.91751	0.742131	0.697218	0.812925	0.545659	0.771353	0.0309057	1.81335	2.25195	1.75493	1.27614	0.839152	2.49698	3.98026	0.416892	0.466073	0.510324	0.714261
CG15922	FBgn0040575	0.000527326	0.00263822	3.27792	0.579437	0.000504716	0.00112285	3.29695	0.582597	4.58686	4.60302	4.66414	4.33516	4.1075	4.04905	4.97956	5.42544	5.18733	4.86665	4.8491	5.05265	5.29794	5.10852	5.19534	5.34615	5.13666	4.93808
CG42808	FBgn0261990	2.13e-05	0.000251301	4.67162	0.579266	1.66e-06	1.98607e-05	5.77989	0.746121	8.98283	9.05557	8.95946	8.08245	8.43515	8.26549	9.63205	9.66182	9.44178	8.94737	8.92421	8.80444	9.77881	9.69356	9.76384	9.14259	9.00909	8.9356
CG32945	FBgn0052945	0.277073	0.221439	0.557406	0.57894	0.0763066	0.037543	1.11744	0.986147	0.372502	0.219615	0.0882571	0.0944937	0.0984885	0.0754217	0.150373	1.52274	0.74408	0.799382	0.632023	0.145128	0.880023	2.65374	0.105054	0.0863825	0.276999	0.129851
Ady43A	FBgn0026602	5.37e-06	9.48571e-05	5.27003	0.578768	0.413805	0.141808	0.383204	0.0634244	4.97691	5.01481	4.97156	4.28387	4.38869	4.49676	5.52505	5.51442	5.66012	4.95943	5.0459	5.00108	5.02592	4.90625	5.22138	4.41289	4.37002	4.27659
CG8349	FBgn0032003	0.437355	0.283067	0.359166	0.578724	0.073279	0.0364922	1.13502	1.41382	0.996509	0.387167	0.545067	0.237075	0.371355	0.466923	0.0999276	1.44573	2.11926	1.53153	0.853733	0.164374	2.34109	3.63543	0.193676	0.276763	0.175531	0.37554
CG13473	FBgn0036442	0.351636	0.2512	0.453907	0.577966	0.0669216	0.0342173	1.17443	1.20151	0.923346	0.654669	0.10902	0.409809	0.437663	0.0914744	0.198886	1.78077	1.44128	1.27848	1.03118	0.701828	1.75092	3.25438	0.286255	0.313421	0.0927597	0.229322
CG5781	FBgn0032448	0.253621	0.210538	0.595815	0.577934	0.0406852	0.0246517	1.39056	1.1053	0.975778	0.467591	0.627491	0.773147	0.523129	0.387663	0.941977	1.17968	1.68301	1.30359	0.776032	0.804003	1.50331	3.22217	0.661286	0.83924	0.489342	0.423452
CG5986	FBgn0043455	0.000701738	0.00323444	3.15383	0.577832	0.649898	0.202084	0.187155	0.0595102	3.66354	3.94331	3.83524	3.91928	3.89003	3.93626	4.48621	4.27586	4.4135	4.22972	4.35943	4.16764	4.06781	3.51491	4.0379	3.84016	4.02395	3.97116
CG8145	FBgn0037617	0.00115682	0.00465363	2.93673	0.577261	0.00271646	0.0036095	2.566	0.512587	2.56626	2.68162	2.76432	2.98492	3.01144	2.8387	3.42565	2.97844	3.33989	3.26585	3.33989	3.58158	3.15739	2.96248	3.43009	3.88069	3.73445	3.69106
CG3121	FBgn0034957	0.257695	0.212762	0.588894	0.577174	0.0278998	0.0188544	1.5544	1.21442	0.513977	0.525362	0.25789	0.1972	0.350331	0.302252	0.283128	1.17223	1.57339	1.34186	0.687029	0.391452	1.85342	2.72212	0.364931	0.299258	0.311972	0.26904
CG5755	FBgn0032664	0.357556	0.253072	0.446656	0.577029	0.0333682	0.021532	1.47667	1.44891	0.322883	0.42649	0.297604	0.0885455	0.0937875	0.176549	0.0521368	1.53395	1.19198	1.02433	0.672115	0.248823	1.87649	3.34059	0.176635	0.129085	0.263561	0.122316
CG9034	FBgn0040931	3.4e-05	0.000349799	4.46852	0.576701	1.38e-05	8.10342e-05	4.86012	0.633216	7.56516	7.50293	7.60985	6.85358	6.96626	6.82067	7.91929	8.32318	8.16557	7.90727	7.78009	7.87314	8.24317	8.12918	8.20523	8.19921	8.04096	7.95625
CG30356	FBgn0050356	0.251626	0.209447	0.599244	0.576647	0.0356994	0.0225541	1.44734	1.13244	0.9701	0.395197	0.626761	0.744372	0.640546	0.730851	0.617581	1.80144	1.30297	1.11107	0.861786	0.861593	1.60742	3.14411	0.637858	0.680078	0.752215	0.612918
CG12400	FBgn0031505	9.2e-05	0.00072082	4.03621	0.575678	2.29e-05	0.000117003	4.64016	0.668138	8.24986	8.17738	8.1124	7.19664	7.21066	7.05884	8.56879	8.95946	8.73843	8.17738	8.27351	8.32667	8.98778	8.74367	8.8126	8.63923	8.59376	8.38361
CG31244	FBgn0051244	0.482307	0.29953	0.316676	0.575391	0.0902471	0.0422702	1.04457	1.46207	1.5297	0.551386	0.1972	0.196882	0.210623	0.225543	0.0770115	1.85338	2.07406	1.67708	1.16172	0.365594	2.45342	3.9777	0.233368	0.175581	0.293386	0.379219
CG14101	FBgn0036905	0.434448	0.28184	0.362062	0.5753	0.077053	0.037795	1.11321	1.37584	1.32681	0.260205	0.445175	0.0410717	0.213693	0.271256	0.0534657	2.01293	1.69169	1.55494	1.10122	0.671737	2.30343	3.61803	0.238239	0.130149	0.149088	0.341495
CG10750	FBgn0032769	0.288625	0.226004	0.539666	0.57482	0.02724	0.0185335	1.56479	1.3012	0.202234	0.273898	0.263724	0.0555959	0.12871	0.228742	0.077922	1.44354	0.942851	0.878314	0.57638	0.0941642	1.73639	2.76432	0.142763	0.234409	0.0487715	0.361327
CG11455	FBgn0031228	5.45e-06	9.57354e-05	5.2636	0.574329	1.11e-07	3.216e-06	6.95468	0.829112	6.99557	6.96626	6.9103	6.25911	6.3521	6.29408	7.34221	7.68774	7.56516	6.76672	6.88889	6.79913	7.82161	7.75394	7.78391	7.08214	7.04616	6.89411
CG7017	FBgn0036951	0.418135	0.275821	0.378683	0.574131	0.487919	0.161634	0.311652	-0.489986	1.03901	0.441757	0.276965	4.3781	3.03123	2.79514	2.7053	0.164299	0.610534	2.95636	4.04601	4.05879	0.0995747	0.0314731	0.15673	0.744372	2.02554	2.80689
CG9519	FBgn0030589	0.000316864	0.00179766	3.49913	0.573517	0.487236	0.161517	0.312261	0.0824528	3.87974	4.00589	4.01233	3.90975	4.16803	3.99497	4.35739	4.70385	4.55727	4.94661	4.94366	4.84564	4.04047	3.90764	4.19721	4.84236	4.46156	4.52492
CG13056	FBgn0040794	0.0517243	0.0740033	1.28631	0.572733	0.0233545	0.0166569	1.63163	0.688652	4.18184	3.17446	2.89114	3.21	3.40064	3.01496	4.06208	3.88142	4.02214	4.21095	4.17117	3.96501	3.94612	3.96683	4.40045	3.94809	3.8536	4.25161
CG31874	FBgn0051874	0.366977	0.256798	0.435361	0.572591	0.0616629	0.03253	1.20998	1.25875	1.17808	0.63173	0.449129	0.985978	1.17086	0.752971	0.516175	1.79017	1.67037	1.5641	1.09846	0.543103	1.91594	3.60652	0.512731	0.514632	0.610534	0.745535
CG15461	FBgn0040649	0.354217	0.251761	0.450731	0.572453	0.091936	0.0428908	1.03651	1.088	1.18114	0.42876	0.661407	1.34415	0.979911	0.853561	0.861593	1.75408	1.373	1.51516	1.06375	0.802448	1.79577	3.48115	0.258384	0.692996	0.415756	0.761427
CG6409	FBgn0036106	0.000233504	0.00142349	3.63171	0.572386	0.0834524	0.0399513	1.07856	0.209051	10.3621	10.4678	10.3889	10.8729	10.8343	10.8343	10.7188	11.0148	11.2023	11.542	11.3713	11.3138	10.5889	10.5381	10.7188	11.4598	11.1459	11.3138
CG30440	FBgn0050440	0.000433607	0.00227997	3.3629	0.572326	0.292013	0.107033	0.534598	0.131416	2.67905	2.72682	2.53122	2.71567	2.60243	2.67492	3.40125	3.17133	3.08149	2.86643	2.95567	2.94857	2.83441	2.46827	3.02866	2.73811	2.63065	2.63684
CG13965	FBgn0032834	0.111728	0.12572	0.951838	0.571714	0.000327795	0.0008271	3.4844	1.65372	3.1659	3.09118	3.17521	3.00041	3.24657	3.21342	3.87719	3.91249	3.35775	4.04253	4.69205	4.05244	5.04684	5.34044	4.00617	4.88367	4.52609	3.89283
CG30499	FBgn0050499	0.000118137	0.000867348	3.92761	0.571506	0.00227262	0.00319416	2.64347	0.394588	4.74404	4.81782	4.62123	4.73746	4.69127	4.7142	5.579	5.06777	5.25084	5.20459	5.03854	5.05516	5.13244	5.1979	5.03651	5.25265	5.20373	5.28454
CG4021	FBgn0034659	0.285602	0.225035	0.544239	0.570421	0.0305305	0.0201485	1.51527	1.25102	0.120953	0.203335	0.257378	0.0540144	0.0557654	0.263836	0.0762471	0.893502	1.32318	1.0893	0.258059	0.135893	1.6787	2.59553	0.0604911	0.173754	0.143449	0.303188
CG9313	FBgn0034566	0.200007	0.182775	0.698955	0.569207	0.010624	0.00946511	1.97371	1.26834	1.82765	1.47835	1.58458	1.06194	1.39078	1.25883	1.71045	2.35377	2.53398	2.26529	1.69976	1.2754	2.93223	3.92505	1.83833	1.44518	1.41496	1.34857
CR43242	FBgn0262887	0.000487959	0.00248318	3.31162	0.569024	0.499628	0.164524	0.301353	0.0837289	2.81368	2.73199	2.86751	2.33152	2.29799	2.53991	3.41737	3.30501	3.39787	2.72608	2.96258	2.96336	2.91323	2.61347	3.13767	2.89334	2.63337	2.76237
Gpa2	FBgn0261386	0.00116273	0.00466159	2.93452	0.569015	0.000602266	0.00126879	3.22021	0.619526	3.41311	3.40863	3.37024	3.41776	3.60845	3.75851	4.02515	3.84733	4.02655	3.88604	4.04095	4.21925	4.08194	3.69661	4.272	4.41048	4.28102	4.46039
CG7910	FBgn0037547	0.0907542	0.108998	1.04213	0.568934	0.279849	0.10328	0.553076	-0.350103	6.169	6.49461	6.42283	6.56733	6.0791	6.22493	7.78761	6.45286	6.55276	6.77954	6.60855	6.48715	6.46036	5.83732	5.73846	6.15266	6.40904	6.5561
kuk	FBgn0038476	1.99e-05	0.000241388	4.70115	0.568811	8.84e-05	0.000309177	4.05355	0.485132	4.04939	4.12247	4.14958	3.94122	4.06269	4.14333	4.72184	4.64468	4.66136	4.37646	4.33876	4.30976	4.5288	4.53506	4.71298	4.8078	4.43898	4.53169
CG14676	FBgn0037388	0.32294	0.240088	0.490878	0.568799	0.0325148	0.0211135	1.48792	1.33345	0.353267	0.576604	0.309384	0.433958	0.317638	0.356279	0.387257	1.23158	1.32681	1.14179	1.24735	0.330172	1.60924	3.2923	0.338074	0.481445	0.42876	0.44142
CG18031	FBgn0023550	0.220528	0.193937	0.656536	0.566782	0.082291	0.0396198	1.08465	-0.831448	3.45109	3.56077	3.80243	3.44612	2.92584	3.39956	5.24538	3.50755	3.76171	3.63107	3.33969	3.75514	3.16654	1.96322	3.19018	3.15012	2.91992	3.77701
CG6980	FBgn0039228	0.278979	0.222305	0.554428	0.566156	0.0293155	0.0195036	1.5329	1.23491	0.622059	0.804819	0.545202	0.755447	0.371705	0.632941	0.699643	1.30742	1.66348	1.31331	0.913433	0.787959	1.7668	3.31208	0.597945	0.803358	0.987331	0.69952
CG9471	FBgn0037749	0.000214915	0.00133612	3.66773	0.563323	0.0181586	0.0138932	1.74092	0.294989	4.36172	4.45693	4.4097	3.60228	3.58259	3.84301	5.05692	4.87714	4.98426	4.7311	4.51337	4.85832	4.76332	4.67715	4.67284	4.40613	4.5412	4.80124
Tektin-C	FBgn0035638	0.242965	0.205212	0.614456	0.563155	0.0124456	0.0106043	1.90498	1.34673	1.0695	0.834583	0.479969	0.623669	0.599991	0.857416	0.724752	1.56944	1.77933	1.66348	1.35442	0.870432	2.19631	3.25783	0.9701	0.910791	0.818312	0.873954
Lk	FBgn0028418	3e-05	0.000319743	4.52288	0.561769	4.47e-05	0.000188201	4.34969	0.53853	5.01965	4.94907	4.85947	5.15479	5.44767	5.33971	5.41343	5.57172	5.52835	5.51914	5.47369	5.41343	5.56802	5.36135	5.51442	5.42544	5.41282	5.18617
CG42448	FBgn0259922	0.353276	0.251631	0.451886	0.560976	0.0605739	0.0321475	1.21771	1.20314	0.550024	0.424862	0.22022	0.217637	0.234907	0.230059	0.16014	1.44395	1.27394	0.838237	0.657428	0.215664	1.49672	3.19704	0.110766	0.0904358	0.234116	0.441542
CG34292	FBgn0085321	0.405394	0.271436	0.392123	0.560925	0.0486727	0.0278185	1.31271	1.42698	1.19282	0.185262	0.175581	0.0796269	0.190167	0.126456	0.305256	1.40353	1.52766	1.35932	0.941977	0.227728	1.97122	3.56848	0.294914	0.234116	0.193839	0.308194
CG6629	FBgn0037860	0.397934	0.268338	0.400189	0.560191	0.0409862	0.024761	1.38736	1.46302	0.445989	0.49288	0.303041	0.0661165	0.0672893	0.257618	0.0935207	1.66117	1.16779	1.44538	0.890181	0.279925	2.01814	3.43428	0.178538	0.130931	0.290949	0.184902
l(2)06225	FBgn0010612	3.06e-05	0.000324679	4.51428	0.559427	2.68e-06	2.75822e-05	5.57187	0.714572	9.62161	9.4362	9.54336	8.29205	8.38749	8.30757	9.85775	10.2623	10.1594	9.09329	9.10065	9.07849	10.3498	10.1888	10.2063	9.32809	9.28425	9.2062
CG14402	FBgn0032894	0.37568	0.260519	0.425182	0.559349	0.0630862	0.0330019	1.20007	1.24516	0.71273	0.327997	0.120828	0.300487	0.0858233	0.130287	0.0480243	1.41325	1.37832	1.0257	0.842598	0.367272	1.65946	3.19616	0.0414062	0.0364427	0.134297	0.268643
CG7194	FBgn0035868	0.0316232	0.0524421	1.49999	0.558706	0.682421	0.210249	0.165948	0.0963257	2.01589	1.74406	2.09562	2.77687	2.84303	2.92219	2.1712	2.98941	2.37107	2.63065	2.75664	2.8428	2.39084	1.49169	2.26202	2.75628	2.88614	2.74791
CG34425	FBgn0085454	0.386892	0.26494	0.41241	0.558599	0.0486682	0.0278185	1.31275	1.36483	0.62644	0.36103	0.179815	0.124614	0.0375005	0.29896	0.0471388	1.43421	1.36173	1.17808	0.778847	0.125317	1.92825	3.24389	0.0896265	0.159674	0.0662283	0.291463
CG10924	FBgn0034356	0.00546575	0.0145228	2.26235	0.558473	0.105727	0.0476365	0.975814	0.28903	4.50858	4.62187	4.51181	3.47997	3.93095	3.42246	5.16418	5.29114	4.86236	4.26808	3.96024	3.79496	4.89558	4.73746	4.87631	3.90177	3.92187	3.52351
Plip	FBgn0039111	0.000288595	0.00167331	3.53971	0.558463	0.0529308	0.0293808	1.27629	0.237825	3.51491	3.47997	3.37004	3.1776	3.04018	3.13181	4.05671	4.00589	3.9777	3.65094	3.59875	3.48374	3.76748	3.36679	3.94413	3.48494	3.4843	3.58546
CG4712	FBgn0033818	0.416176	0.274942	0.380723	0.557938	0.0464356	0.0269418	1.33315	1.47082	0.592972	0.415335	0.234698	0.121267	0.305348	0.26989	0.1384	1.26743	1.51099	1.19699	0.789875	0.250017	2.06814	3.55903	0.0282971	0.205639	0.264578	0.348465
CG17324	FBgn0027074	0.00115021	0.0046349	2.93922	0.557913	0.438135	0.148498	0.358392	0.105566	2.49582	2.62193	2.50819	3.05441	3.26981	3.30057	3.10306	3.24326	2.95336	3.2238	3.39282	3.01144	2.69502	2.53241	2.71522	3.29441	3.21794	2.81779
CG31380	FBgn0051380	0.000510034	0.00256688	3.2924	0.557763	0.177977	0.0715754	0.749636	0.169636	2.55714	2.75698	2.88614	2.44658	2.3426	2.26886	3.33602	3.39342	3.14411	3.52499	3.57119	3.7609	2.8979	2.85229	2.95898	3.1447	3.02702	3.48096
Cht7	FBgn0035398	0.0616159	0.0833767	1.21031	0.55747	0.60356	0.191352	0.21928	-0.144221	1.05288	1.29445	1.35864	0.514173	0.612918	0.53886	2.4758	1.40407	1.4985	0.918637	1.01866	1.02315	0.920912	0.678268	1.67411	0.89845	0.924801	1.02297
CG10510	FBgn0037059	0.229117	0.198551	0.639943	0.557201	0.0189791	0.0143489	1.72172	1.1913	0.437663	0.348759	0.110178	0.116843	0.306513	0.211383	0.42304	0.89747	1.24769	0.971592	0.573021	0.200038	1.46335	2.67898	0.328161	0.317041	0.301924	0.302128
pyd3	FBgn0037513	0.00151299	0.00561494	2.82016	0.556311	0.0005262	0.00115693	3.27885	0.638283	4.12898	4.11611	3.92714	3.88049	3.91193	3.44371	4.73898	4.52151	4.58067	4.59794	4.49321	4.59649	4.66098	4.62449	4.80161	5.06946	4.57692	4.83022
Amy-d	FBgn0000078	0.112857	0.1266	0.947471	0.556275	0.186781	0.0742837	0.728667	-0.455326	8.59836	8.9955	8.67048	8.58503	7.99461	8.39445	9.75014	8.9955	9.18753	9.22062	9.48388	9.44674	7.70673	8.86497	8.32667	8.08245	9.13427	8.90613
CG10932	FBgn0029969	8.12e-05	0.000655773	4.09044	0.555061	0.487398	0.161534	0.312116	0.0682433	5.36732	5.36085	5.38887	5.37628	5.36135	5.39129	6.20946	5.74169	5.83107	6.20822	6.20668	6.05238	5.45536	5.33807	5.52835	5.91212	5.81768	5.84917
Oscp	FBgn0016691	3.27e-06	7.14707e-05	5.48545	0.555052	4.3e-07	8.45695e-06	6.36653	0.67304	9.7536	9.63205	9.74754	8.24867	8.32903	8.27987	10.0874	10.4137	10.2972	9.34651	9.23844	9.23844	10.431	10.3715	10.3498	9.3761	9.34347	9.2719
CG7264	FBgn0036214	0.326786	0.24153	0.485737	0.554966	0.0426452	0.02539	1.37013	1.23077	0.522078	0.488934	0.343292	0.213161	0.444961	0.343444	0.207751	1.50122	1.31023	0.999151	0.772857	0.248103	1.82209	3.01496	0.209575	0.154663	0.367484	0.257963
CG7742	FBgn0031690	0.369089	0.257811	0.432869	0.554911	0.0223384	0.0161529	1.65095	1.55852	1.7869	1.55341	1.4713	1.17808	1.00697	1.32966	1.30867	2.56897	2.59871	2.2828	2.03088	1.25622	3.29324	4.60302	1.59092	1.70753	1.70954	1.46631
Muc68E	FBgn0053265	0.138756	0.144939	0.857748	0.553684	0.434341	0.147508	0.362169	-0.282403	4.31844	4.08681	3.97074	3.89283	3.25779	3.18443	4.62136	4.46396	4.95172	4.66145	4.97647	5.19085	3.60136	3.27036	4.65706	4.04757	4.87981	4.96405
Sc2	FBgn0035471	0.0143451	0.0293136	1.8433	0.553167	0.701205	0.214777	0.154155	-0.0760052	5.82431	6.08939	6.05204	6.16153	5.97465	6.01195	7.08946	6.14738	6.3884	6.40221	6.13998	6.19977	6.08636	5.77246	5.8789	6.00126	6.14247	6.30014
Diedel3	FBgn0085358	0.0971025	0.114103	1.01277	0.552832	0.0806692	0.0390485	1.09329	0.585987	6.3056	7.24757	6.56488	3.33332	3.26044	3.53934	6.7519	7.6211	7.40355	7.08656	7.32414	7.10652	6.87867	7.44509	7.55225	6.46987	7.3881	6.63955
CG1146	FBgn0035346	6.94e-06	0.000113894	5.15864	0.552569	9.02e-10	1.23335e-07	9.04479	1.2496	6.57783	6.54123	6.4152	6.87867	6.90272	6.88668	7.08388	7.11687	6.99123	6.53787	6.4585	6.45417	7.80074	7.65628	7.82605	7.40355	7.28698	7.08388
CG4433	FBgn0038763	1.67e-06	4.40593e-05	5.77728	0.552497	2.65e-06	2.73715e-05	5.57675	0.52846	4.69643	4.5301	4.6033	4.1419	4.16919	4.22538	5.0611	5.28775	5.13847	4.43133	4.43091	4.41797	5.20403	5.03714	5.17404	4.31789	4.43683	4.28041
CG14316	FBgn0038567	0.341449	0.247811	0.466674	0.552161	0.0229299	0.0164393	1.6396	1.45316	0.153918	0.210911	0.251774	0.248103	0.0422553	0.273816	0.0540379	1.41974	0.799307	0.923392	0.727722	0.228953	1.67717	3.11971	0.179214	0.0836386	0.268643	0.363132
CG5548	FBgn0030605	0.000741343	0.00336111	3.12998	0.550895	0.000103622	0.000349639	3.98455	0.696141	7.40355	7.16548	7.27988	6.09752	6.06674	6.0151	7.51008	7.97202	8.01949	6.7123	6.53176	6.6051	8.03109	7.91929	7.98695	6.69032	6.40221	6.3884
Mal-A2	FBgn0002569	0.252903	0.210177	0.597046	0.55023	0.546431	0.176917	0.262465	0.28434	5.9633	5.43844	5.80956	5.02476	4.53622	4.84703	5.21921	6.87449	6.7683	6.81419	6.64753	7.60251	5.8378	5.82431	6.40221	5.82189	6.90512	7.2016
fwd	FBgn0004373	4.36e-05	0.000416912	4.36051	0.549805	0.470113	0.157056	0.327798	0.0657903	4.33789	4.33608	4.32664	4.50221	4.5062	4.51025	4.67427	4.95099	5.02476	5.11021	5.19132	4.88952	4.48949	4.41175	4.29674	4.35333	4.43641	4.36465
CG5398	FBgn0034882	0.460593	0.291309	0.336683	0.548616	0.0500333	0.0283927	1.30074	1.56776	1.0386	0.325759	0.507767	0.15667	0.416892	0.169264	0.272083	1.39759	1.84829	1.55904	1.46688	0.537517	2.51399	3.87324	0.188165	0.210095	0.303794	0.641412
CG34188	FBgn0085217	0.170197	0.16589	0.769048	0.548336	0.0102626	0.00924351	1.98874	1.14262	0.188995	0.286255	0.185262	0.264918	0.406898	0.560257	0.12322	1.15712	1.02518	0.720414	0.503369	0.128734	1.4242	2.24488	0.419298	0.360188	0.248471	0.342589
CG9166	FBgn0029514	0.00185869	0.00655428	2.73079	0.547526	0.071029	0.0356502	1.14856	0.273139	3.20303	3.15123	3.10683	2.93877	2.99917	2.8984	3.67991	3.82296	3.6008	3.53462	3.29376	3.30134	3.64351	3.05441	3.58259	3.63674	3.29782	3.40782
CG17122	FBgn0036962	0.18183	0.173276	0.740334	0.547161	0.00964105	0.00885402	2.01588	1.18682	0.858717	0.569781	0.630023	0.625008	0.569166	0.595523	0.779332	1.53028	1.3904	1.17998	0.963353	0.510324	1.81395	2.92071	0.88432	0.736386	0.81798	0.760275
CG13324	FBgn0033789	0.347611	0.249899	0.458906	0.546697	0.0196072	0.0147114	1.70758	-1.50541	6.57909	5.9075	6.25455	7.98036	7.13649	6.75496	6.66432	6.55932	7.15759	7.20905	7.91929	8.27095	4.115	4.0451	6.0648	5.2851	6.38626	6.77954
CG31773	FBgn0051773	0.434865	0.281994	0.361646	0.546626	0.0375123	0.0233147	1.42583	1.58196	0.968674	0.400678	0.208526	0.146388	0.11215	0.209982	0.177757	1.36063	1.67937	1.37218	0.878045	0.291555	2.30853	3.74316	0.272083	0.211033	0.245091	0.248697
CoVIIc	FBgn0040773	4.04e-05	0.000398361	4.39362	0.546572	3.07e-06	3.01893e-05	5.51286	0.709657	8.67421	8.50978	8.62149	7.56163	7.52579	7.55536	8.89648	9.32809	9.22062	8.53086	8.58135	8.56879	9.3761	9.30088	9.25747	8.89049	8.79679	8.73843
CG14687	FBgn0037835	2.89e-07	1.50534e-05	6.5391	0.546487	1.36e-07	3.82857e-06	6.86646	0.58559	7.10615	7.10652	7.00744	6.24932	6.33631	6.36283	7.53292	7.70241	7.62425	6.86733	6.95183	6.77954	7.65628	7.71076	7.60985	6.92576	6.99123	6.90937
CG11913	FBgn0039331	0.264324	0.215663	0.577863	0.546254	0.0240246	0.0170207	1.61934	1.20429	0.178848	0.38146	0.368122	0.468267	0.421648	0.557808	0.113361	1.29502	1.15881	0.922084	0.636028	0.469053	1.55139	2.69645	0.293471	0.365318	0.491504	0.683768
l(3)neo43	FBgn0011476	7.6e-05	0.0006288	4.11919	0.54596	1.23e-05	7.41987e-05	4.91009	0.661183	5.67857	5.22759	5.32578	4.55937	4.60538	4.7477	5.91523	5.98378	5.9708	5.58733	5.62445	5.55863	6.03063	6.02939	6.15545	6.01941	5.9075	5.90404
CG14505	FBgn0034327	0.129672	0.138798	0.887154	0.54589	0.0289228	0.019297	1.53876	0.832265	0.276999	0.226077	0.133235	0.210446	0.546462	0.202234	0.242641	0.961109	1.07023	0.583208	0.551182	0.269425	0.725682	2.00841	0.399015	0.345042	0.157636	0.132763
mRpL20	FBgn0036335	4.3e-06	8.41223e-05	5.36653	0.545735	0.00698247	0.00700065	2.15599	0.224523	4.94529	4.7469	4.74	4.24389	4.33221	4.36235	5.41542	5.30784	5.34615	5.27427	5.17981	5.13502	5.05516	4.97439	5.07622	5.23423	5.0958	4.99253
CG30154	FBgn0050154	0.00971076	0.0220896	2.01275	0.545688	0.0291324	0.0194042	1.53562	-0.440186	4.72555	4.49962	4.9445	5.80287	5.7989	5.76771	5.65769	5.09131	5.05774	4.36584	4.54217	4.82585	4.43855	4.00308	4.40748	4.2633	4.19912	4.37489
CG5569	FBgn0034919	1.35e-05	0.000180872	4.86967	0.545227	1.18e-08	7.36584e-07	7.92812	1.05374	5.09496	5.05242	5.12804	4.76478	4.75579	4.7659	5.7425	5.66376	5.50484	5.80395	5.76727	5.58078	6.19723	6.15892	6.08048	6.27755	6.06067	6.01214
CG15086	FBgn0034374	0.463028	0.292216	0.334393	0.544839	0.0304005	0.0200766	1.51712	1.7633	0.629437	0.330585	0.192866	0.0603403	0.0233705	0.179082	0.0165341	1.51367	1.2572	1.32966	0.939459	0.227462	2.63571	3.76171	0.0453812	0.0833037	0.117839	0.247512
CG14892	FBgn0038447	0.0109851	0.0240539	1.9592	0.544481	0.19188	0.0758409	0.71697	0.25066	1.9511	2.38409	1.99064	1.655	1.96008	1.66467	2.84091	2.61293	2.50542	2.62463	2.51763	2.4069	2.56043	1.91594	2.60144	2.38345	2.64957	2.44808
CG3609	FBgn0031418	0.00691018	0.0172586	2.16051	0.54421	0.148583	0.0622023	0.828031	0.258226	7.29194	7.65628	7.58234	7.03557	7.00544	7.06924	8.20653	7.98695	7.96971	8.18167	7.97202	8.04964	7.68387	7.68774	7.93363	7.67794	8.32667	8.4242
CG5435	FBgn0032431	0.334514	0.244931	0.475586	0.544134	0.138435	0.0589335	0.858754	0.858991	0.858717	0.825822	0.380869	0.471593	0.331161	0.431462	0.494181	1.41477	1.78886	1.24388	1.00478	0.394206	1.47991	2.96336	0.199114	0.368122	0.486479	0.290522
CG33301	FBgn0053301	0.093654	0.111269	1.02847	0.544027	0.937672	0.267993	0.0279491	-0.0238587	4.53134	5.04872	4.53208	3.76171	3.41311	3.33751	5.1833	5.31716	5.24376	5.5896	5.53266	5.33629	4.35712	4.67065	5.01279	4.40248	5.73846	5.58215
CG12119	FBgn0030102	1.02e-05	0.000151179	4.9914	0.54401	4.92e-06	4.16357e-05	5.30803	0.584728	5.20287	5.12621	5.24974	4.86418	4.76478	4.8078	5.68094	5.87313	5.65677	5.39844	5.47626	5.25265	5.79439	5.64032	5.89829	5.17889	5.17593	5.13754
CG6569	FBgn0038909	0.310725	0.235295	0.507624	0.543911	0.0379731	0.0234735	1.42052	1.19814	1.24642	1.11494	1.03583	1.03603	0.982953	1.22279	0.93148	1.96937	2.12807	1.79761	1.34985	0.773935	2.36769	3.60136	1.02255	1.02189	0.985489	0.986161
CG17300	FBgn0036345	0.442943	0.285437	0.353652	0.543687	0.102979	0.0466841	0.987251	1.20945	1.20155	0.408073	0.210766	0.207247	0.0992214	0.152262	0.151497	1.57736	1.72259	1.76785	0.955324	0.443003	1.93828	3.40452	0.105935	0.187902	0.400347	0.422391
CG4681	FBgn0069913	0.377501	0.261295	0.423082	0.542837	0.0366161	0.0229464	1.43633	1.39289	1.16795	0.479823	0.529013	0.600768	0.57435	0.586665	0.513716	1.58932	1.70226	1.66218	1.1793	0.546643	2.25712	3.54641	0.551918	0.623669	0.731601	0.523129
CG8021	FBgn0037602	0.0032437	0.00984917	2.48896	0.54136	0.0121039	0.0103996	1.91707	0.436157	3.68417	3.47227	3.32123	3.41941	3.57002	3.59346	4.13438	3.92135	4.04601	3.75406	3.67081	4.08625	4.11182	3.61381	4.0605	4.21026	3.96501	4.20383
CG3560	FBgn0030733	2.97e-07	1.51465e-05	6.52724	0.540885	1.12e-07	3.216e-06	6.95078	0.59107	10.443	10.3715	10.5381	9.06576	9.23844	9.16661	10.9289	11.0317	11.0148	10.1594	10.2063	10.2251	11.0401	11.0148	11.071	10.4137	10.3131	10.2623
Jon99Cii	FBgn0003356	0.394085	0.267183	0.40441	0.540588	0.695648	0.213545	0.15761	-0.24508	8.10374	9.48388	8.82993	2.55365	2.21945	4.62227	10.236	8.69496	9.10841	8.68326	8.48437	8.10374	8.20523	8.88587	8.59122	7.40065	8.59122	8.06419
CG7441	FBgn0036763	0.0527844	0.0748875	1.27749	0.540065	0.00343654	0.00425632	2.46388	0.913032	3.92078	3.76247	3.75215	3.25896	3.34445	3.34369	4.12453	4.49849	4.43257	4.11182	3.8351	3.54758	4.77352	5.35447	4.0465	3.80758	3.74395	3.6269
CG3927	FBgn0034739	0.257817	0.212776	0.588688	0.539934	0.0114141	0.00996497	1.94256	1.35592	0.268393	0.613279	0.667209	0.493942	0.515401	1.20502	0.543018	1.33413	1.29154	1.04096	0.271256	0.353916	2.46581	2.57421	0.576604	0.419228	0.275003	0.469758
CG6662	FBgn0035907	2.84e-06	6.50711e-05	5.54668	0.538977	4e-06	3.60954e-05	5.39794	0.521204	3.03874	3.26857	3.13272	3.2989	3.32123	3.37493	3.69465	3.66523	3.69708	3.84937	3.65923	3.69903	3.70652	3.68812	3.609	3.90861	3.74497	3.93694
CG7371	FBgn0031710	1.4e-09	4.74286e-07	8.85387	0.538929	8.88e-08	2.79733e-06	7.05159	0.373534	3.66884	3.75514	3.7855	4.28142	4.19299	4.24422	4.27324	4.27104	4.28199	4.38739	4.4135	4.3781	4.12247	4.05244	4.15517	4.3704	4.31033	4.32604
CG15260	FBgn0028850	0.444642	0.286065	0.35199	0.538929	0.090365	0.0422912	1.044	1.25574	1.23205	0.510132	0.184253	0.0832876	0.198316	0.249673	0.120953	1.58012	1.84215	1.51666	0.914518	0.234907	2.02908	3.44631	0.21828	0.163171	0.134722	0.167904
Dic3	FBgn0033248	0.287137	0.22547	0.541911	0.538269	0.0627434	0.0328945	1.20243	0.99118	0.546945	0.0655053	0.293666	0.0641089	0.152698	0.106247	0.0901052	1.45033	0.980488	1.15712	0.822459	0.274923	1.20227	2.50371	0.173681	0.256492	0.161931	0.178848
CG15025	FBgn0038709	0.413511	0.274105	0.383513	0.537799	0.0594663	0.0317844	1.22573	1.32146	0.744372	0.44976	0.152135	0.0433656	0.167586	0.114543	0.0580109	1.29413	1.60752	0.927082	0.972438	0.207494	1.6669	3.4561	0.187642	0.233168	0.153953	0.221277
CG6465	FBgn0037818	0.000481737	0.00246474	3.31719	0.536597	0.000259607	0.000694728	3.58568	0.578146	4.09251	4.34639	4.38739	3.55184	3.60754	3.66466	4.80192	4.90305	4.7311	4.65673	4.80236	4.81782	4.80444	4.9603	4.79599	4.44465	4.74536	4.94227
IM14	FBgn0067905	0.0269113	0.0468563	1.57007	0.536423	0.762972	0.229093	0.117491	0.0656761	8.04704	7.63886	8.24867	10.0233	10.0819	10.2063	8.77626	8.1124	8.65518	8.39698	8.91299	8.94737	7.92147	7.96146	8.24867	8.80666	8.64217	9.08727
CG34117	FBgn0083953	1.67e-05	0.000210653	4.77728	0.535891	0.0110885	0.00974291	1.95513	0.233165	6.88515	6.7034	6.74143	6.5116	6.67063	6.48332	7.22206	7.39258	7.32301	7.34139	7.43401	7.31891	7.05588	6.89411	7.07948	7.50293	7.35981	7.27034
CG14290	FBgn0038662	1.83e-06	4.69186e-05	5.73755	0.535782	1.15e-08	7.3381e-07	7.9393	0.851788	7.09307	6.93184	7.03068	6.26333	6.30358	6.40948	7.41914	7.64169	7.60211	6.73798	6.79584	6.62522	7.83849	7.87134	7.90114	6.97053	6.95838	6.9422
Cyp4e3	FBgn0015035	0.00389827	0.0112739	2.40913	0.535755	9.42e-07	1.47005e-05	6.02595	1.37356	4.62767	4.50987	4.62652	5.6465	5.66439	5.82308	4.94366	5.21848	5.20917	5.93849	5.94296	5.57121	6.18164	5.72108	5.98202	7.93363	7.9453	7.49398
CG14763	FBgn0033243	0.0873356	0.106319	1.05881	0.535553	0.0462523	0.0268683	1.33487	0.639333	2.51013	2.89231	2.2439	2.4256	2.56104	2.46049	2.97377	2.94974	3.3295	3.06182	2.81548	2.66746	3.1708	3.92087	2.47267	2.59656	2.51399	2.29487
CG12171	FBgn0037354	0.00400463	0.0114625	2.39744	0.535056	0.0791442	0.0385116	1.10158	0.289247	5.53431	5.62958	5.47241	5.12951	5.00475	5.03527	6.16153	6.12093	5.95901	6.3553	6.18841	6.35653	5.73383	5.77438	5.99583	5.80754	6.48777	6.48386
snoRNA:Psi28S-3571	FBgn0082954	0.13979	0.145683	0.854524	0.534941	0.364754	0.128087	0.438	0.318679	2.81634	2.63684	2.97244	3.3412	3.18856	2.93289	2.68715	3.43428	3.90901	2.90395	2.51474	3.01618	3.23202	2.4164	3.73323	3.09101	3.08064	3.53992
tRNA:CR30227	FBgn0050227	0.164645	0.162549	0.783451	0.534629	0.989127	0.278315	0.00474794	-0.00502635	0.818251	0.908814	0.793721	1.46774	1.21748	1.41237	1.03725	0.867575	2.21984	0.975998	1.38212	0.969521	0.602546	0.327143	1.57602	1.29089	0.910791	0.586131
CG15800	FBgn0034904	0.531886	0.318405	0.274181	0.53462	0.139465	0.059249	0.855535	1.31456	1.8909	0.758754	0.545441	0.551918	0.521301	0.42368	0.602678	1.93223	2.26405	2.43437	1.5186	0.790617	2.83124	4.17252	0.13501	0.753979	0.684472	0.720189
CG42650	FBgn0261502	0.399915	0.26927	0.398032	0.53456	0.0619821	0.0326204	1.20773	1.26054	0.74293	0.098379	0.0932825	0.216167	0.103376	0.0796269	0.159311	0.878314	1.50065	1.14125	0.720189	0.27477	1.33583	3.27015	0.110228	0.195095	0.0808734	0.531577
CG31819	FBgn0028893	0.38915	0.265594	0.409883	0.534326	0.0556273	0.0303496	1.25471	1.26721	0.415335	0.606068	0.114392	0.120574	0.0822402	0.215664	0.0457315	1.32318	1.36986	1.19189	0.791069	0.248562	1.80703	3.09071	0.0396853	0.0726724	0.309384	0.284554
CG11165	FBgn0033238	0.351041	0.250978	0.454642	0.533709	0.0479627	0.0275719	1.3191	1.21119	0.58037	0.10427	0.0998963	0.233757	0.348678	0.0851324	0.393297	1.13532	0.857044	1.41329	0.770137	0.230059	1.2754	3.0226	0.120113	0.209767	0.243691	0.146503
Lrt	FBgn0034540	0.00539908	0.0144041	2.26768	0.533553	0.377574	0.131655	0.422998	0.144344	2.82236	2.87319	2.76175	3.34377	3.46957	3.39418	3.47035	3.36879	3.21881	3.55057	3.52328	3.21126	3.037	2.57664	3.27668	3.43582	3.36879	3.0692
CG17118	FBgn0032291	0.284018	0.224423	0.546654	0.532641	0.020166	0.0149936	1.69538	1.27118	0.521055	0.653665	0.525645	0.287754	0.362594	0.346772	0.567578	1.33107	1.39964	1.26256	0.742131	0.372244	1.78958	3.11499	0.609355	0.602309	0.214965	0.363335
CG5043	FBgn0032636	0.401419	0.269976	0.396402	0.532185	0.0166695	0.0131138	1.77808	1.70036	0.0358052	0.511473	0.389978	0.20661	0.122013	0.44211	0.108817	1.32806	1.09694	1.21514	0.499911	0.118509	2.62573	3.20837	0.204226	0.312482	0.236136	0.456282
ACXD	FBgn0040507	0.00817687	0.0194981	2.08741	0.532119	0.0119396	0.0103078	1.92301	0.497841	2.91141	2.7883	2.6098	2.11703	2.02388	2.05039	3.22198	3.43285	3.25103	2.69139	2.60293	2.86644	3.29036	2.94684	3.56583	2.25277	2.82128	2.7905
GstE3	FBgn0063497	0.00313362	0.00962585	2.50395	0.531905	0.000574374	0.00122531	3.24081	0.669567	6.43607	6.54546	6.51389	6.14738	5.84498	5.74052	6.85358	7.21417	7.02338	6.84461	6.76194	7.11687	7.24738	7.08946	7.16728	6.81419	7.22576	7.29009
Cyt-c-p	FBgn0000409	4.14e-05	0.000404854	4.383	0.531781	4.09e-07	8.25783e-06	6.38828	0.838016	10.6038	10.4137	10.3715	8.65635	8.65518	8.56102	10.7985	11.0401	11.1459	9.96596	10.0141	9.81642	11.3138	11.3138	11.2755	9.77881	9.70613	9.65893
CG7707	FBgn0036703	0.334201	0.244874	0.475992	0.531269	0.0227153	0.0163677	1.64368	1.37922	0.358087	0.379722	0.197811	0.0547527	0.126197	0.341859	0.344814	1.14551	1.0391	0.885501	0.635322	0.314856	1.85029	3.08499	0.138006	0.106362	0.22956	0.358991
CG32454	FBgn0260481	0.0676138	0.0889303	1.16996	0.531108	0.00721215	0.00715837	2.14194	0.854163	0.521255	0.293386	0.355267	0.487922	0.397189	0.523246	0.922084	0.711005	1.13014	0.920696	0.645755	0.615154	0.992276	2.06373	0.676388	0.554563	0.630121	0.753446
CR43989	FBgn0264721	0.138217	0.144712	0.859439	0.530909	0.860568	0.251124	0.0652148	0.05999	1.27525	2.01756	1.69337	1.84608	1.17786	1.5186	2.97963	1.54758	2.0517	2.28218	2.17942	2.217	1.82876	1.20569	2.1317	2.50752	2.48771	2.57775
CG13581	FBgn0035014	0.374954	0.260183	0.426022	0.530791	0.0755272	0.0373015	1.1219	1.1206	0.619937	0.81361	0.584958	0.492745	0.81087	0.693354	0.307232	1.47137	1.83227	1.44395	0.916839	0.685056	1.72585	3.29154	0.36293	0.845261	0.634858	0.744736
CG13186	FBgn0033680	0.363307	0.255617	0.439726	0.530612	0.0749324	0.0370843	1.12533	1.09491	0.707161	0.295276	0.282597	0.191017	0.0885088	0.0687668	0.129589	1.43631	1.31097	1.62657	1.29039	0.501894	1.36586	2.97721	0.226705	0.0782584	0.253119	0.279172
CG42752	FBgn0261806	0.248058	0.207826	0.605447	0.530074	0.0388395	0.0238709	1.41073	1.01245	0.609355	0.153729	0.145098	0.150542	0.158576	0.302493	0.260314	1.14233	1.09576	0.525329	0.894254	0.37276	1.29413	2.47115	0.180248	0.262998	0.215489	0.0997151
CG15576	FBgn0029700	0.364334	0.255922	0.4385	0.528902	0.0424126	0.0253033	1.37251	1.27351	0.663678	0.167768	0.158112	0.160461	0.0724807	0.171898	0.100727	1.06297	1.41257	1.26891	0.726695	0.389328	1.78181	2.94988	0.0783996	0.141545	0.118287	0.196859
CG14282	FBgn0038685	0.286375	0.225134	0.543065	0.528808	0.0213063	0.0155713	1.67149	1.25443	0.287209	0.36915	0.466923	0.0659182	0.23884	0.300816	0.469682	1.08011	1.15991	1.16042	0.663695	0.200875	1.59723	2.91798	0.371355	0.261265	0.250881	0.362594
snoRNA:Me18S-G1189	FBgn0086058	0.236407	0.202009	0.62634	0.528227	0.485412	0.161006	0.313889	-0.305072	1.46474	0.908814	0.793721	1.13049	1.21748	1.67289	1.61117	2.57775	0.563041	1.30074	1.38212	1.30755	0.380869	0.513716	1.35748	0.984388	1.6169	1.17858
ttm2	FBgn0035124	0.508734	0.309593	0.293509	0.528218	0.109078	0.0488627	0.962263	1.34235	1.02625	0.612918	0.869867	0.562303	0.256771	0.503436	0.135728	2.1292	1.82876	1.98862	1.30684	0.600268	2.55527	3.88155	0.0992676	0.350132	0.209987	0.515331
CG11588	FBgn0036221	0.249058	0.208186	0.6037	0.52801	0.0148745	0.012011	1.82756	1.23822	0.0615605	0.214013	0.205775	0.0588516	0.0600787	0.0983365	0.0822402	1.17568	0.807458	0.742404	0.393297	0.18467	1.63636	2.40663	0.153011	0.11215	0.0503409	0.0879565
CG4270	FBgn0031407	0.42011	0.276701	0.376637	0.527614	0.0818509	0.0394734	1.08698	1.2002	0.85338	0.324834	0.31537	0.0944937	0.098379	0.150373	0.149793	1.18303	1.7436	1.19198	0.854757	0.262153	1.65067	3.33862	0.104893	0.186319	0.0771478	0.249958
Msi	FBgn0043025	0.483377	0.299881	0.315714	0.527579	0.132501	0.0568795	0.877781	1.17731	1.5173	0.666065	0.909236	0.533896	0.410773	0.657119	0.0964263	2.15242	2.42649	1.81122	1.43268	0.960054	2.29487	3.82118	0.508473	0.498246	0.802448	0.776235
CG18278	FBgn0033836	0.0224014	0.0406764	1.64972	0.527248	0.0708736	0.0356022	1.14952	-0.398888	1.64835	1.9037	1.81889	2.38654	2.28537	2.28398	2.55513	1.94113	2.45642	2.14884	2.17229	2.07331	1.29135	0.971549	1.91137	2.25402	2.15333	2.28047
CG16781	FBgn0029661	0.308604	0.234355	0.510598	0.527225	0.0762514	0.037543	1.11775	0.961957	0.356279	0.302955	0.245837	0.141983	0.151436	0.206471	0.0516543	0.98068	1.45441	0.662889	0.56942	0.19566	1.0598	2.63224	0.0989046	0.0808734	0.178402	0.0957749
CG5265	FBgn0038486	0.435708	0.282309	0.360804	0.527197	0.0674289	0.0343781	1.17115	1.31426	0.876993	0.364109	0.0923846	0.0288311	0.0290533	0.0791846	0.0360768	1.41426	1.46474	1.2291	0.854865	0.435435	1.82814	3.41665	0.0314731	0.060854	0.0806153	0.177757
snoRNA:Psi28S-2996	FBgn0082980	0.0938696	0.111386	1.02748	0.526119	0.276543	0.102316	0.558237	-0.329641	1.96221	1.32839	1.80301	2.01589	2.59925	2.16716	2.74494	1.79824	2.1288	2.21735	2.30883	2.24535	0.932583	1.23229	1.93982	2.06701	1.8441	2.29859
CG13255	FBgn0040636	0.00562838	0.0148796	2.24962	0.525639	0.00241982	0.00333414	2.61622	0.597519	4.12189	4.30251	4.0773	4.07894	3.7547	3.73662	4.37851	4.86715	4.83296	4.26108	4.461	4.68171	4.7659	4.72258	4.80578	4.30609	4.43414	4.73282
Tektin-A	FBgn0028902	0.45404	0.289128	0.342906	0.523229	0.0483235	0.0276906	1.31584	1.48619	1.07023	0.283669	0.20639	0.0274776	0.0602092	0.192612	0.0328417	1.77573	1.32141	1.36162	0.975626	0.276496	2.24477	3.53167	0.242429	0.0568131	0.100211	0.262665
CG15873	FBgn0035003	0.273249	0.220166	0.563441	0.523018	0.065221	0.0337498	1.18561	0.924297	0.30334	0.165641	0.157216	0.0709381	0.0718858	0.271288	0.100211	1.241	0.854038	0.613279	0.307596	0.0589776	0.886995	2.43383	0.0782584	0.213274	0.176755	0.149088
CG10405	FBgn0038431	0.268447	0.217716	0.571141	0.522823	0.0644686	0.0335053	1.19065	-0.917219	2.04588	1.59092	2.02686	3.2251	2.50371	2.72184	3.55035	1.48126	2.20052	2.83662	2.98873	2.95898	0.642954	0.634915	1.63414	1.91552	2.59286	2.7094
CG31174	FBgn0051174	0.348997	0.250301	0.457178	0.522367	0.124603	0.054194	0.904472	0.885019	1.60924	1.01573	1.25652	1.25652	1.13532	1.77159	0.602784	2.30229	2.54352	1.6332	1.20377	1.0996	2.29904	3.17454	1.06297	1.07125	1.25883	1.54881
CG5556	FBgn0031332	0.363436	0.255632	0.439572	0.522354	0.0878557	0.0414146	1.05623	1.02736	0.884565	0.364931	0.1384	0.0641089	0.0652506	0.106247	0.0901052	1.26188	1.60297	0.947232	0.602125	0.274923	1.39964	2.89665	0.173681	0.126992	0.209982	0.135893
CG31601	FBgn0051601	0.208482	0.187486	0.680931	0.522015	0.0334259	0.021554	1.47592	0.943105	0.507533	0.232292	0.0518253	0.992735	1.02764	1.17751	0.0733873	1.22056	1.06375	1.17999	0.87916	0.895311	1.26336	2.13049	0.22711	1.01517	0.955839	1.04516
Lsm10	FBgn0033554	0.0422007	0.0644404	1.37468	0.521833	0.624629	0.196105	0.204378	-0.115284	2.78699	2.89875	2.57209	3.36328	3.26467	3.31208	3.50127	2.94636	3.37571	2.97988	3.12185	3.02879	3.06579	1.97301	2.87319	3.30057	3.27201	3.08149
Ucp4C	FBgn0031757	0.355415	0.252084	0.449264	0.521729	0.0389223	0.0239006	1.4098	1.25806	0.496718	0.36699	0.105744	0.463304	0.632822	0.532868	0.192612	0.930176	1.41185	1.01254	0.644325	0.303469	1.47698	3.04596	0.220694	0.889254	0.422391	0.294208
Csas	FBgn0052220	8.32e-06	0.000129805	5.07988	0.521556	0.00042726	0.00100726	3.36931	0.339082	4.17419	4.00431	4.17147	3.86141	3.67991	3.72901	4.60573	4.70456	4.60435	4.29005	4.45843	4.35333	4.45843	4.39413	4.51465	4.53111	4.30976	4.43257
CG42597	FBgn0260996	0.321143	0.239427	0.493302	0.521531	0.0236149	0.0168056	1.62681	1.30577	0.374649	0.293611	0.130281	0.271812	0.290119	0.102175	0.237905	1.24607	0.87916	0.938547	0.408073	0.264375	1.66218	2.89077	0.162906	0.118802	0.103774	0.252716
CG13843	FBgn0038993	0.262891	0.215086	0.580224	0.521443	0.0115566	0.0100618	1.93717	1.32132	1.18345	0.47198	0.899636	0.976219	0.753979	1.06166	1.30527	1.26028	1.55385	1.28647	1.33103	1.35366	2.11557	3.46218	0.941272	0.822518	0.735619	0.819833
Cda9	FBgn0034197	0.468453	0.294096	0.329334	0.521219	0.148415	0.0621501	0.828522	-1.07522	2.8165	2.73089	2.63621	5.32638	4.26928	4.32863	5.32905	2.0562	2.36201	3.84487	4.80557	4.07425	1.83341	1.19406	1.93046	3.25311	4.10927	4.32386
whip	FBgn0250827	0.489142	0.301956	0.310565	0.521156	0.0605778	0.0321475	1.21769	1.51259	1.11559	0.35031	0.395081	0.173754	0.080836	0.33843	0.111615	1.81294	1.4999	1.41185	1.09576	0.311972	2.6098	3.70173	0.0872085	0.345716	0.189183	0.485061
CG16985	FBgn0035355	0.120417	0.132296	0.919312	0.520873	0.445397	0.150586	0.351253	0.245839	4.91197	4.75297	4.68362	4.53923	4.34689	4.14231	5.39243	5.2276	5.29114	4.71746	4.79754	5.70832	4.88367	4.89234	5.31007	4.56353	5.61558	5.81328
CG43049	FBgn0262351	0.339292	0.246924	0.469426	0.520788	0.0916495	0.0427911	1.03787	0.959443	0.744372	0.470484	0.523246	0.355267	0.37079	0.211125	0.468288	1.46351	1.36867	1.03026	0.690641	0.475132	1.57413	2.94139	0.100915	0.483912	0.430657	0.123838
CG17839	FBgn0036454	0.000225249	0.00138026	3.64734	0.520003	0.00121064	0.00207044	2.91698	0.421719	5.98455	6.05715	5.97404	5.47626	5.50826	5.50226	6.4754	6.45663	6.64373	6.51108	6.33937	6.08553	6.51932	6.3521	6.40948	6.3929	6.10465	6.14579
CheA84a	FBgn0261290	0.00136005	0.00520623	2.86645	0.519335	0.0231953	0.0165846	1.6346	0.325894	4.82836	4.5154	4.58804	3.61906	3.64535	3.42524	5.03624	5.02429	5.42928	4.88648	4.78607	4.78497	4.96367	4.89991	5.0459	4.89409	4.55338	4.88952
CG33489	FBgn0053489	0.328236	0.241999	0.483814	0.518816	0.0444926	0.0261874	1.35171	1.14223	0.349902	0.114896	0.253069	0.206981	0.0343009	0.151974	0.0433827	0.826866	1.40407	0.875265	0.668836	0.146645	1.37218	2.68689	0.0854781	0.0704854	0.125317	0.275222
CG13693	FBgn0031235	0.291332	0.226966	0.535612	0.518325	0.0223151	0.016149	1.6514	1.23113	0.220677	0.125461	0.269077	0.427598	0.397686	0.189737	0.116785	1.21882	0.834583	0.771528	0.591535	0.15351	1.53297	2.62573	0.14989	0.271256	0.13195	0.314856
CG33970	FBgn0053970	0.00399735	0.0114486	2.39823	0.517333	0.188087	0.0746583	0.725641	0.203401	5.82759	5.79736	5.80666	4.99253	5.20373	5.06946	6.46036	6.35304	6.17022	6.33701	6.43339	5.74865	6.01378	6.05548	5.97256	6.19114	6.10045	5.92136
CG30148	FBgn0050148	0.056816	0.0789078	1.24553	0.516758	0.923525	0.264919	0.0345513	-0.0240414	3.29424	3.06518	2.93651	3.53462	3.49779	3.40553	3.89226	3.13181	3.82213	3.45327	3.38023	3.95128	3.17005	2.55456	3.49919	3.76171	3.72878	3.78896
CG32551	FBgn0052551	0.00101033	0.00423683	2.99554	0.516336	0.0352274	0.0223735	1.45312	0.28412	5.6477	5.41473	5.46486	4.99119	5.272	4.94963	5.8595	5.99187	6.22493	6.20946	6.21642	6.1337	5.75017	5.63421	5.99527	6.07393	5.8519	6.00608
CG7888	FBgn0036116	8.49e-06	0.000132022	5.07109	0.516139	0.243432	0.092131	0.613622	0.0857894	4.64091	4.7384	4.83203	4.67917	4.79706	4.75601	5.09762	5.27773	5.3844	5.20826	5.16179	5.12183	4.87472	4.73163	4.86236	4.95099	4.86179	4.88573
I-t	FBgn0025821	0.28905	0.226156	0.539027	0.516061	0.0231502	0.0165564	1.63545	1.21041	0.174777	0.235322	0.224457	0.270952	0.105854	0.300174	0.163391	1.05067	0.968674	0.857076	0.69829	0.154969	1.36643	2.69502	0.204345	0.150693	0.165362	0.299763
CG5705	FBgn0032486	0.00322759	0.00982542	2.49112	0.515887	0.308735	0.112033	0.510414	0.149558	2.9077	2.97862	3.00583	2.89982	2.97407	2.89334	3.68784	3.50292	3.24905	3.48022	3.40766	3.13441	3.29669	2.77795	3.26618	3.50127	3.43611	3.33427
CG4480	FBgn0032553	0.341201	0.247783	0.46699	0.515719	0.0329049	0.0213042	1.48274	1.25411	0.523363	0.214245	0.14777	0.0417192	0.161931	0.306093	0.144183	0.968674	1.31968	0.822886	0.609355	0.232679	1.50982	2.95336	0.18453	0.0405057	0.219124	0.127041
Cyp4d8	FBgn0015033	2.06e-06	5.06232e-05	5.68613	0.514996	3.02e-05	0.000140092	4.51999	0.393454	4.37664	4.36408	4.48565	4.25695	4.22365	4.24246	4.86289	4.86665	5.04183	4.96183	4.98566	4.95655	4.79397	4.70225	4.91052	4.93535	4.78084	4.90921
CG12020	FBgn0035273	0.365892	0.256522	0.436647	0.514923	0.077935	0.038104	1.10827	1.05612	0.584958	0.453061	0.179214	0.235795	0.305348	0.28139	0.0671259	1.1793	1.51557	1.23038	0.644218	0.46434	1.52026	2.81185	0.0534657	0.0473876	0.212866	0.31573
Hydr1	FBgn0033382	1.43e-05	0.000187356	4.84466	0.514703	0.00250904	0.00341447	2.60049	0.279629	5.92082	5.90681	5.82759	5.30069	5.39129	5.39545	6.34154	6.4639	6.39389	6.48777	6.34765	6.26512	6.20996	6.0722	6.21196	6.16874	5.97256	5.89111
mRpL34	FBgn0083983	0.000173865	0.00114055	3.75979	0.514507	4.75e-05	0.000196249	4.32331	0.594137	4.11636	4.05294	4.19721	3.57857	3.43793	3.44567	4.7406	4.56152	4.6079	4.09923	4.39326	4.38964	4.79706	4.57359	4.77827	4.55401	4.27766	4.44166
CG13907	FBgn0035173	3.47e-07	1.61815e-05	6.45967	0.514501	7.41e-06	5.37305e-05	5.13018	0.38386	5.50558	5.3844	5.45636	4.96162	4.86289	4.89899	5.87032	6.03623	5.9833	5.32812	5.32738	5.39319	5.82026	5.76554	5.91212	5.16667	5.07239	5.06053
CG6279	FBgn0036125	0.552964	0.326685	0.257303	0.514112	0.101515	0.0461881	0.99347	1.49361	2.32835	1.40171	1.45357	1.67717	2.02686	1.78263	0.812881	2.86579	3.0473	2.75508	2.31655	1.55195	3.59908	5.03717	1.0282	1.29574	1.15416	1.57143
jhamt	FBgn0028841	0.236133	0.201901	0.626843	0.513511	0.235663	0.0897823	0.627709	-0.514058	3.21529	3.4954	2.88443	3.00496	3.38221	3.61437	4.9683	3.27699	2.89036	3.66995	3.48397	3.03217	2.76175	2.69139	2.5998	3.30008	3.20956	3.2338
olf186-F	FBgn0041585	0.000599787	0.00289685	3.222	0.513502	0.00221926	0.00314944	2.65379	0.431251	3.82213	4.1017	3.92859	3.62187	3.8632	3.50289	4.44988	4.51465	4.4284	4.16183	4.01322	3.8914	4.45255	4.22311	4.47051	4.06332	4.17313	3.90177
CG7551	FBgn0036161	0.366287	0.256647	0.436178	0.513498	0.0812135	0.0392524	1.09037	1.0411	0.684627	0.335643	0.113276	0.0551374	0.0569454	0.0480243	0.077375	1.31485	1.28181	1.12432	0.609355	0.392138	1.33549	2.86013	0.0612151	0.176549	0.0481246	0.199531
CG5800	FBgn0030855	0.0955587	0.112778	1.01973	0.513158	0.0173029	0.0134463	1.76188	-0.782726	2.6098	2.83124	2.87837	3.76748	3.51429	3.74316	2.60852	3.36895	3.88142	2.96698	3.63391	3.43018	1.84899	1.68421	2.43803	2.98291	3.00114	2.9908
CG12896	FBgn0033521	0.00224501	0.00754091	2.64878	0.512943	0.00459467	0.00521573	2.33775	0.460994	4.57117	4.63413	4.38801	5.01481	4.6861	4.69285	5.06715	4.82318	5.24181	5.33459	5.22598	5.04883	4.88773	4.93453	5.15404	5.35725	5.24286	5.53442
SdhB	FBgn0014028	2.22e-05	0.000257965	4.65365	0.512905	0.00381484	0.00456622	2.41852	0.274067	9.70613	9.7567	9.7536	8.59376	8.69496	8.57828	10.1726	10.3862	10.1964	9.86426	9.76384	9.56737	10.0579	9.99522	9.98552	9.68369	9.54513	9.48934
CG31805	FBgn0051805	0.217291	0.192168	0.662958	0.512471	0.0258543	0.0178959	1.58747	1.0003	0.100819	0.0982032	0.291509	0.0985554	0.102769	0.272626	0.159115	1.08824	0.780588	0.667961	0.364109	0.0540144	1.42887	2.031	0.0315509	0.0898107	0.161613	0.113706
CG11695	FBgn0030316	0.00411227	0.011693	2.38592	0.512326	0.494868	0.163314	0.305511	0.102045	2.80226	2.66304	2.7594	3.30662	3.45327	3.24155	3.5154	3.16084	3.08544	3.61381	3.46729	3.54028	2.7865	2.56436	3.17997	3.62917	3.41589	3.39282
CG31431	FBgn0051431	0.0131243	0.0274698	1.88192	0.511859	0.0955724	0.0442051	1.01967	0.318373	3.14162	2.91149	3.0692	2.77936	2.78481	2.69227	3.27015	3.66292	3.72481	3.24091	3.30501	3.74248	3.34005	3.11692	3.62046	3.24326	3.51849	3.7456
Rpi	FBgn0050410	0.005571	0.0147447	2.25407	0.511622	0.23747	0.090315	0.624391	0.18877	4.70287	4.80154	4.71369	4.29426	4.30952	4.16474	5.57751	4.87811	5.29735	5.40837	5.03431	5.1601	4.99464	4.75207	5.03769	5.15191	5.17271	5.36895
List	FBgn0034381	0.000415264	0.00220553	3.38168	0.511336	0.0980116	0.045087	1.00872	0.19012	3.37398	3.45815	3.39787	3.0734	3.07753	3.24264	3.82047	3.99637	3.94717	3.98026	4.27737	4.04757	3.6377	3.42821	3.73445	3.58103	3.43983	3.79959
CG10663	FBgn0036287	0.00114704	0.00462606	2.94042	0.511211	0.0147527	0.011953	1.83113	0.34303	2.84924	2.94323	2.89414	2.75664	2.83743	2.92748	3.45474	3.40265	3.36286	2.91428	2.80622	2.92376	3.34445	2.86579	3.50547	2.95762	2.83124	2.86875
CG6873	FBgn0030951	0.374632	0.260074	0.426395	0.510807	0.0480481	0.0275933	1.31832	1.21925	0.466923	0.419019	0.324782	0.0983365	0.102089	0.156044	0.157377	1.13955	1.44622	1.34021	0.999151	0.627491	1.43595	3.1794	0.253134	0.192612	0.0798553	0.257963
CG17919	FBgn0037433	0.000959885	0.00408305	3.01778	0.508461	0.0500603	0.0283964	1.30051	0.255124	6.05759	6.21347	6.24466	5.73452	5.97365	6.02463	6.60855	6.70865	6.72391	6.60272	6.61356	6.16389	6.42769	6.42906	6.42434	6.5561	6.34882	6.28861
mRpL10	FBgn0031231	3.58e-05	0.000363585	4.44612	0.508304	6.08e-06	4.75703e-05	5.2161	0.609321	4.83982	4.69501	4.83133	4.80053	4.77959	4.83594	5.26382	5.33807	5.28919	5.19878	5.30409	5.15404	5.41343	5.21125	5.56945	5.77029	5.59347	5.59463
CG13144	FBgn0032260	0.0124564	0.0263422	1.90461	0.508162	0.00447048	0.00511014	2.34965	0.603828	3.35611	3.43734	3.25773	2.4817	2.85359	2.27674	3.62524	3.75789	4.19252	3.52139	3.12552	3.16618	4.09757	3.74395	4.02113	3.23202	3.09831	3.10072
CG30281	FBgn0050281	0.133397	0.141324	0.874854	0.507994	0.0218053	0.0158552	1.66144	-0.831216	2.57223	2.95525	2.71126	3.51799	2.95168	3.07276	3.46729	3.29497	3.00044	1.89417	2.35299	2.97844	2.2465	1.34913	2.14945	1.44128	1.61803	2.23808
CR43708	FBgn0263847	0.273437	0.220166	0.563143	0.507259	0.933335	0.267013	0.0299624	-0.0377528	0.699246	1.6723	1.18517	1.86557	2.0562	2.00097	2.97721	0.976964	1.12432	1.92305	1.64835	1.47698	1.02636	0.825079	1.59202	1.20666	1.69611	1.42045
l(2)41Ab	FBgn0262123	0.00134123	0.00515178	2.8725	0.507067	1.58e-05	9.0196e-05	4.80134	0.846374	1.02607	0.881431	1.0391	0.893355	0.790617	0.598613	1.3836	1.70267	1.38153	1.25148	1.27992	1.33103	1.76635	2.09562	1.62374	1.67984	1.59519	1.79275
mRpL45	FBgn0263863	4.79e-06	8.97956e-05	5.31966	0.506257	0.0125229	0.0106481	1.9023	0.190101	5.28775	5.35021	5.36929	4.99728	4.98403	5.00045	5.8238	5.90998	5.79223	5.37794	5.3844	5.30784	5.63478	5.33459	5.60818	5.17826	5.09682	5.07974
CG34204	FBgn0085233	0.518915	0.313641	0.284904	0.506224	0.124672	0.0542076	0.904231	1.25759	1.3673	0.931926	0.460233	0.173754	0.342941	0.530048	0.300608	1.50312	2.4744	1.88956	0.810001	0.610534	2.16716	4.00566	0.359413	0.153242	0.240073	0.208392
CG9483	FBgn0032072	0.353019	0.251626	0.452202	0.505471	0.0411436	0.0248162	1.3857	1.19654	0.591027	0.252716	0.158576	0.0711127	0.0725686	0.0576179	0.100915	0.939131	1.47869	0.871846	0.704797	0.165619	1.79843	2.71503	0.0784842	0.141748	0.118445	0.196904
mir-998	FBgn0262405	0.187243	0.176239	0.727594	0.505397	0.305512	0.111101	0.514972	-0.386787	1.17968	1.54552	0.812617	1.6147	1.72527	1.54411	2.12383	0.687513	2.24266	1.46108	1.24451	1.58012	0.391917	0.753093	1.23245	0.648675	1.04122	1.1829
CG1722	FBgn0031168	0.341993	0.248028	0.465983	0.505038	0.0504167	0.028492	1.29743	1.10979	0.50684	0.263214	0.252477	0.299109	0.264497	0.180545	0.197899	1.09846	1.24128	0.961109	0.600029	0.27641	1.35805	2.86112	0.132745	0.104073	0.18638	0.350867
Prosalpha6T	FBgn0032492	0.3976	0.268338	0.400554	0.504925	0.0380037	0.0234825	1.42017	1.34173	0.51257	0.228468	0.45252	0.0632239	0.0644464	0.205106	0.0885455	1.46278	1.15701	1.32872	0.737751	0.364355	1.93723	3.11176	0.169745	0.12489	0.20807	0.219124
CG1979	FBgn0026563	0.414931	0.274624	0.382024	0.503908	0.246837	0.0931618	0.60759	0.726473	2.98664	2.94391	3.0023	2.40604	2.71429	2.86205	3.11499	3.87066	3.45893	3.93464	3.93095	2.77064	3.93095	5.09593	2.0854	3.47227	3.82819	2.83743
mRpS10	FBgn0038307	0.000333904	0.00186532	3.47638	0.503532	0.00189571	0.00282921	2.72223	0.402397	3.91736	3.87696	3.59059	3.55604	3.63787	3.70829	4.32293	4.19124	4.38133	4.16711	3.97132	4.1292	4.05796	4.19252	4.34161	4.28377	4.13595	4.04047
CG32396	FBgn0052396	0.453403	0.288958	0.343516	0.502997	0.0725428	0.0362326	1.13941	1.27782	1.04096	0.280592	0.224219	0.17957	0.279779	0.129121	0.118334	1.20885	1.72758	1.2247	0.796021	0.431265	1.88956	3.39956	0.0901052	0.110827	0.132763	0.165663
CG3473	FBgn0028913	0.304746	0.232673	0.516062	0.502984	0.0281876	0.0189596	1.54994	1.17037	0.317894	0.346695	0.22711	0.221277	0.340337	0.235322	0.164668	1.03305	1.20294	1.0996	0.618182	0.361072	1.76161	2.52736	0.113831	0.0926681	0.0824896	0.1384
CG4259	FBgn0031389	0.0297795	0.0502633	1.52608	0.502784	0.0279563	0.0188881	1.55352	-0.509817	2.38745	2.47746	2.64865	2.79805	2.69502	2.67316	2.65464	3.26175	3.10552	2.86875	2.66304	2.49116	2.35686	1.48775	2.13951	2.03212	1.81335	1.97208
CG30427	FBgn0043792	0.00149694	0.00559037	2.8248	0.502767	0.0565733	0.0307314	1.24739	0.259275	3.74395	3.93634	3.82864	3.08406	3.50127	3.37571	4.39801	4.33535	4.28387	4.14626	4.14333	3.76561	4.15552	3.9504	4.18084	4.29426	4.19721	4.06148
CG15458	FBgn0040651	0.218246	0.192579	0.661054	0.502615	0.021465	0.0156452	1.66827	1.02229	0.155302	0.31573	0.416892	0.379647	0.405412	0.557361	0.473526	1.27848	0.643762	0.726695	0.631579	0.107604	1.26891	2.35189	0.333997	0.574633	0.38584	0.510228
CR43939	FBgn0264567	0.231615	0.199818	0.635233	0.50237	0.0606541	0.0321751	1.21714	0.825436	0.515787	0.673748	0.199777	0.352099	0.617981	0.450611	0.463794	1.20018	1.23245	0.817577	0.922084	0.552708	1.26918	2.36064	0.235808	0.368265	0.377404	0.361129
CG6429	FBgn0046999	0.000131944	0.000934017	3.87961	0.50214	0.000513229	0.00113449	3.28969	0.427653	6.16078	6.21502	6.03971	6.41428	6.5561	6.4152	6.6677	6.67688	6.57735	6.54123	6.5561	6.52791	6.61272	6.36382	6.72192	6.78856	6.51022	6.54721
sut2	FBgn0028562	0.163245	0.161537	0.78716	0.502059	0.00808579	0.00776254	2.09228	-1.07113	2.58571	2.82342	2.5587	3.57638	3.0122	3.07035	3.85695	2.71444	2.90262	3.15196	3.29613	3.51429	1.3983	1.17998	2.17616	2.87615	3.54664	3.80043
CG3610	FBgn0038266	0.389576	0.265742	0.409408	0.501727	0.03175	0.0207238	1.49826	1.36559	0.412856	0.489678	0.399015	0.0791651	0.0363873	0.186574	0.0453049	1.17727	1.58416	1.15826	0.806786	0.121778	1.97301	3.09031	0.335005	0.233368	0.217915	0.25985
CG14103	FBgn0036908	3.3e-06	7.17896e-05	5.48149	0.501536	5.1e-05	0.000203676	4.29243	0.379406	4.19328	4.09601	4.18154	4.94177	4.94937	4.88039	4.69442	4.67917	4.60184	4.69819	4.80895	4.87573	4.5896	4.39249	4.62695	4.96308	4.94529	4.84767
alphaKap4	FBgn0035657	0.241795	0.204603	0.616553	0.501342	0.0571675	0.030943	1.24285	0.85655	0.200792	0.256367	0.0841689	0.0881882	0.0929669	0.035993	0.0519545	0.970062	1.02334	0.720071	0.276999	0.276188	0.918637	2.14817	0.044166	0.0392381	0.0363873	0.121038
CG12391	FBgn0033581	0.0011984	0.0047208	2.9214	0.50126	0.00657567	0.00670987	2.18206	0.390062	3.38283	3.30185	3.45681	3.40265	3.18494	3.2874	4.13595	3.67508	3.83424	3.94206	3.87324	3.77674	3.75565	3.58781	3.96822	3.87233	3.68187	3.85977
CG5646	FBgn0039525	9.76e-06	0.000147421	5.01055	0.500914	6.78e-06	5.13835e-05	5.16877	0.519471	5.87472	5.77029	5.68646	5.35725	5.42247	5.28291	6.368	6.22155	6.24466	6.42028	6.24647	6.31884	6.38626	6.20668	6.29694	6.0648	5.89829	5.9708
Las	FBgn0029158	1.12e-05	0.000159042	4.95078	0.500837	7.62e-06	5.42935e-05	5.11805	0.52055	6.3468	6.35849	6.38477	6.19977	6.17808	6.08636	6.89411	6.92685	6.77162	6.98662	7.01467	6.76416	6.89749	6.79584	6.95838	7.08607	7.02065	6.91419
CG13893	FBgn0035146	0.00117797	0.00469886	2.92887	0.50057	0.00806494	0.00774512	2.0934	0.375595	4.00924	3.98751	3.88964	3.52574	3.59314	3.63674	4.24866	4.72813	4.4113	4.26928	4.12625	4.25492	4.38498	4.14333	4.48485	4.1292	4.42983	4.29172
CG13088	FBgn0032047	0.231547	0.199818	0.635361	0.500093	0.0112984	0.00989404	1.94698	1.18607	1.54758	1.1793	1.51604	1.55046	1.28063	1.72585	1.71311	1.71686	2.31323	2.06373	1.72585	1.6313	2.72184	3.6055	1.47378	1.56171	1.40407	1.42856
CG4660	FBgn0029839	0.0752437	0.0956244	1.12353	0.499893	0.050185	0.0284058	1.29943	-0.558714	2.25027	2.20145	2.36201	2.45215	2.39041	2.28615	3.28439	2.36975	2.65927	2.40463	2.57262	2.50787	1.60032	1.20502	2.33225	2.11402	2.26293	2.43803
CG7848	FBgn0034127	0.284221	0.224483	0.546344	0.499587	0.0261229	0.0180183	1.58298	1.13026	0.640108	0.635758	0.601207	0.718362	0.845261	0.867516	0.448136	1.54499	1.3827	1.08824	0.77603	0.551918	1.69133	2.94904	0.627491	0.85364	0.955667	0.789171
CG7712	FBgn0033570	3.9e-05	0.000386162	4.40894	0.499283	6.72e-05	0.000250272	4.17263	0.470921	8.57475	8.49297	8.58135	7.68387	7.88127	7.80715	8.90811	9.15657	9.08224	8.88032	8.68546	8.65635	9.09329	8.95946	9.00909	9.0279	8.94028	8.84513
HtrA2	FBgn0038233	4.64e-06	8.76767e-05	5.33348	0.498948	0.000341139	0.000852787	3.46707	0.31461	3.40863	3.35558	3.52715	3.73146	3.75986	3.80946	4.04588	3.96024	3.78209	3.61956	3.50713	3.47513	3.75283	3.73294	3.74942	3.56848	3.47579	3.46521
beta4GalNAcTB	FBgn0039625	0.00161506	0.00590594	2.79181	0.498613	0.118801	0.0521923	0.92518	-0.206903	3.29964	3.179	3.36164	3.24326	3.18974	3.14162	3.58187	3.85562	3.89863	3.57174	3.38338	3.77221	2.92427	2.95804	3.33725	3.12325	3.22198	3.2669
CG5807	FBgn0027539	1.49e-06	4.06141e-05	5.82681	0.498234	0.330597	0.118333	0.480701	0.0577544	3.41835	3.40782	3.29117	2.73559	2.67316	2.72464	3.80105	4.00054	3.81045	3.04735	2.9823	3.11971	3.43889	3.41589	3.43582	2.84811	2.97589	2.97844
CG12376	FBgn0033323	0.318494	0.238298	0.496899	0.498141	0.0447829	0.0262959	1.34889	1.0722	0.280096	0.387663	0.0603403	0.140007	0.0644849	0.15622	0.0353303	1.0645	1.12269	0.949279	0.497191	0.150652	1.46281	2.45067	0.0312201	0.124957	0.134478	0.356118
CG4880	FBgn0030803	0.000209938	0.00131566	3.67791	0.49804	0.0019625	0.00288687	2.70719	0.374942	1.29273	1.44354	1.52614	1.538	1.52274	1.70496	2.05519	1.79824	1.9031	1.96366	1.8909	2.08173	1.83301	1.88503	1.6692	2.0534	2.21945	2.32397
CG11699	FBgn0030311	0.000709855	0.00325604	3.14883	0.496964	0.00110027	0.00192089	2.9585	0.469466	5.82853	5.68725	5.69699	4.79599	4.95013	4.76478	6.0151	6.25249	6.43607	6.01941	5.66376	5.66737	6.20592	6.15192	6.26333	5.73741	5.62445	5.64381
CG5122	FBgn0032471	0.434101	0.281768	0.362409	0.496759	0.0626422	0.0328594	1.20313	1.2596	0.867516	0.252779	0.205996	0.118673	0.0473097	0.121343	0.091802	1.25455	1.47021	1.14794	0.828853	0.424671	1.84552	3.22739	0.0321852	0.0912639	0.203371	0.098379
CG14407	FBgn0030584	2.12e-05	0.000250745	4.67366	0.496601	3.58e-06	3.29478e-05	5.44612	0.593509	6.77162	6.7837	6.64156	6.50113	6.41972	6.32138	7.24757	7.29009	7.14902	7.56858	7.47393	7.3614	7.37272	7.21648	7.3882	7.76188	7.67794	7.56516
CG14891	FBgn0038445	0.321102	0.239427	0.493357	0.49575	0.0486275	0.0278185	1.31312	1.05112	0.462936	0.0819011	0.225632	0.0373057	0.132872	0.19104	0.0475189	1.21252	0.997676	1.02255	0.551918	0.20796	1.20377	2.56891	0.15114	0.161217	0.133327	0.19278
CG13436	FBgn0034532	0.201245	0.183447	0.696275	0.495107	0.0603881	0.0321145	1.21905	0.758952	1.2247	0.941977	0.741791	0.996913	1.04885	0.837365	1.29258	1.34583	1.75538	1.47021	0.997676	0.85104	1.49107	2.80748	0.886777	0.952191	0.950704	0.869961
CG12069	FBgn0039796	0.371306	0.258712	0.430268	0.494993	0.0963174	0.0444287	1.0163	0.961618	0.735766	0.337719	0.247823	0.0322717	0.0323472	0.20329	0.103376	1.24053	1.46238	0.838887	0.657119	0.301221	1.39982	2.76999	0.0363543	0.0672893	0.151742	0.201177
fan	FBgn0028379	0.550512	0.325662	0.259233	0.494395	0.115047	0.0508782	0.939125	1.36757	2.15468	2.11963	1.54908	1.68421	1.64835	1.86696	1.09274	3.04956	3.16427	2.9077	2.34576	1.09145	3.72948	4.92657	1.27003	1.35643	1.41426	1.5013
CG9815	FBgn0034861	0.0685296	0.0895142	1.16412	0.494229	0.0869785	0.0411572	1.06059	-0.460354	2.67316	2.63705	2.36435	2.60852	2.46005	2.36769	3.37886	2.81548	2.96291	3.22315	3.03111	2.91428	1.6692	1.8207	2.80361	2.58848	2.61512	2.82472
CG8249	FBgn0034045	0.00273364	0.0086774	2.56326	0.494112	0.28331	0.104376	0.547738	0.147707	3.1012	3.39282	3.21108	3.02297	3.17454	3.06257	3.82006	3.5999	3.76748	4.031	3.80678	3.94331	3.27568	3.17191	3.70065	3.8644	4.08822	4.15602
CG18131	FBgn0031343	0.354836	0.251899	0.449972	0.493556	0.0426688	0.0253981	1.36989	1.16259	0.38983	0.27281	0.0619832	0.100365	0.105068	0.44149	0.0922723	0.972575	1.14044	1.01082	0.525631	0.154421	1.39759	2.74212	0.0726806	0.0620099	0.31184	0.0985554
CG31735	FBgn0051735	0.407879	0.272196	0.389469	0.493348	0.0268927	0.0184121	1.57037	1.44975	0.437975	0.349764	0.0966867	0.172624	0.0482425	0.0411726	0.16847	0.983031	1.21297	1.25071	0.839483	0.192339	1.96548	3.15279	0.115397	0.203877	0.0833037	0.303041
CG34010	FBgn0054010	0.0569114	0.0789478	1.2448	0.493043	0.0548975	0.0300829	1.26045	-0.497784	1.17825	1.48108	1.3979	1.01203	1.41329	0.943388	2.25027	1.89531	1.39078	1.81633	2.21753	2.38992	0.766713	0.565583	1.23158	1.51516	1.47472	1.7
CG18472	FBgn0039463	0.123023	0.134133	0.910014	0.492757	0.0172273	0.0134057	1.76378	0.820306	0.191609	0.568882	0.580423	0.508473	0.412794	0.506879	0.64399	0.979911	1.19529	0.85364	0.659573	0.23916	1.27003	2.01625	0.515555	0.553612	0.49521	0.609355
Cht5	FBgn0038180	0.0119278	0.0254828	1.92344	0.492531	0.0426903	0.0254004	1.36967	-0.377213	2.1288	2.37329	2.42552	2.39767	2.58634	2.48771	3.03918	2.85359	2.51244	2.57223	2.73479	2.71444	1.97925	1.55494	2.26178	2.89036	2.69613	2.79829
CG42841	FBgn0262030	0.259022	0.213171	0.586663	0.492346	0.0688344	0.034841	1.16219	0.830468	0.500399	0.354919	0.128331	0.13195	0.0616634	0.101253	0.0850244	1.35311	1.02255	0.753324	0.513081	0.300251	0.97737	2.25163	0.246057	0.117429	0.103039	0.211185
CG11236	FBgn0031860	0.000950425	0.00406144	3.02208	0.492241	0.0126086	0.0107138	1.89933	0.331789	4.93593	4.87647	4.94177	4.76718	4.58977	4.55465	5.69444	5.17271	5.36375	5.44471	5.42051	5.20459	5.26168	5.16252	5.32534	5.43986	5.60995	5.51749
CG2964	FBgn0031462	0.409974	0.272712	0.387244	0.492216	0.0667833	0.0341824	1.17533	1.16217	0.716111	0.351013	0.26989	0.19306	0.408073	0.284706	0.0386154	1.12259	1.65245	1.25114	0.838311	0.416908	1.57736	3.06182	0.184351	0.13378	0.218986	0.209187
Neb-cGP	FBgn0083167	0.000435488	0.0022848	3.36102	0.491573	8.43e-06	5.86105e-05	5.07417	0.756861	8.50284	8.27095	8.42711	7.41585	7.42826	7.41585	8.62287	9.09329	8.95946	8.27095	8.36226	8.30429	9.25747	9.09705	9.11696	8.76182	8.72634	8.55739
Cyp309a1	FBgn0031432	0.000327789	0.00183966	3.48441	0.491527	0.143367	0.0605216	0.843551	0.155002	5.33629	5.45338	5.33324	5.24051	4.90079	5.03431	5.97365	5.94955	5.67429	5.95901	6.01118	5.87279	5.51914	5.49705	5.57172	6.08553	6.30236	6.35304
Mdr65	FBgn0004513	0.000706139	0.00324527	3.15111	0.491316	0.00272128	0.00361323	2.56523	0.409018	3.02019	2.95052	3.04472	2.94561	2.93298	3.02019	3.3986	3.49571	3.59507	3.24389	3.24366	3.26353	3.35441	3.15818	3.72989	3.55153	3.43018	3.60096
CG13102	FBgn0032088	0.161223	0.160173	0.792573	0.490859	0.546147	0.17688	0.26269	-0.204186	3.15976	3.31208	3.24366	2.2465	1.72862	2.27515	3.22542	4.05714	3.9055	3.20877	3.10407	3.54153	3.25438	2.4285	3.42005	2.73199	3.88427	3.13681
Galk	FBgn0263199	0.000336269	0.00187412	3.47331	0.490859	0.991545	0.278777	0.00368757	0.00107292	5.86568	5.88988	5.86868	5.85172	5.99661	5.99125	6.51485	6.1278	6.45417	6.95838	6.87867	6.87449	5.81553	5.77223	6.03971	6.84293	6.67688	6.91955
Arp11	FBgn0031050	5.03e-06	9.24673e-05	5.29843	0.490279	0.0214537	0.0156452	1.6685	0.166663	4.24196	4.32543	4.24866	4.58852	4.70872	4.59963	4.75888	4.77594	4.75207	4.95486	4.8726	4.84822	4.40557	4.30745	4.60302	4.63905	4.5245	4.57718
CG30060	FBgn0050060	0.155582	0.15648	0.808041	0.490128	0.0289342	0.019297	1.53859	0.802301	1.02913	0.747055	0.656808	0.804848	0.873751	0.924642	1.14523	1.69518	1.06297	0.838237	1.10569	1.17841	1.55241	2.50643	0.781054	0.764343	0.696186	0.65619
mRpL54	FBgn0034579	0.00152262	0.00563745	2.81741	0.48937	0.00352847	0.00433257	2.45241	0.433805	4.41448	4.00634	4.21073	4.24861	4.34591	4.36584	4.82464	4.49962	4.77538	4.98141	5.16805	5.03651	4.62807	4.46332	4.84156	5.39545	5.2944	5.21739
CG33668	FBgn0053668	0.246015	0.206735	0.609038	0.489263	0.052045	0.0290577	1.28362	0.865017	0.125678	0.38584	0.11508	0.121267	0.129237	0.564436	0.210827	1.04122	0.842337	0.788912	0.851529	0.530048	0.838163	2.2392	0.144283	0.108043	0.19531	0.240073
CG9582	FBgn0032090	0.342113	0.248065	0.46583	0.488643	0.0324549	0.0210841	1.48872	1.19433	0.698748	0.243505	0.149697	0.0678168	0.164418	0.0553292	0.266949	1.20539	1.08554	0.75497	0.494136	0.376918	1.46351	2.94561	0.265821	0.0636272	0.220295	0.143188
CG1636	FBgn0030030	1.67e-06	4.40593e-05	5.77728	0.488516	3.21e-07	7.25771e-06	6.49349	0.570261	5.8774	5.79037	5.80585	5.38526	5.34034	5.33762	6.32138	6.33937	6.27842	5.87198	5.83596	5.79638	6.42283	6.25135	6.51022	5.87142	5.71627	5.78281
CG43168	FBgn0262787	0.450609	0.287835	0.3462	0.488406	0.0676894	0.0344497	1.16948	1.25768	0.510228	0.474195	0.44976	0.0621874	0.14777	0.154969	0.0877347	0.988488	1.82318	1.23158	0.80683	0.270325	1.89475	3.24335	0.069124	0.122253	0.105225	0.216307
mRpL9	FBgn0038319	7.59e-05	0.0006288	4.11976	0.488363	0.00038606	0.00093548	3.41335	0.404981	5.44471	5.11293	5.43844	4.88863	4.94529	4.86527	5.91733	5.82431	5.71953	5.506	5.47193	5.51442	5.80956	5.61866	5.78281	5.45298	5.4376	5.34233
CG6470	FBgn0030933	0.299376	0.230241	0.523783	0.487833	0.00277077	0.0036546	2.5574	1.68658	0.545067	0.525702	0.411356	0.521382	0.347218	0.403581	0.469841	1.24349	1.23229	0.932583	1.10872	0.766713	2.41512	3.30173	0.825015	0.789171	0.843302	0.682826
Vha100-3	FBgn0028669	0.281433	0.223304	0.550625	0.486905	0.0267749	0.0183577	1.57227	1.0891	0.0748498	0.229194	0.0920377	0.0215245	0.0215245	0.0786653	0.0256505	0.814642	1.0165	0.627009	0.404263	0.059718	1.21252	2.37082	0.0800284	0.0433055	0.0403768	0.10427
CG3270	FBgn0033093	0.00244905	0.00803285	2.611	0.486887	0.004596	0.00521573	2.33762	0.44305	5.03431	5.41866	5.50334	4.21331	3.93711	4.32105	5.71627	5.81681	5.88388	5.97658	6.10015	6.0722	5.7717	5.73452	5.77923	5.54362	5.63858	5.89375
aru	FBgn0029095	0.000374014	0.00202731	3.42711	0.486475	0.00944231	0.00872921	2.02492	0.307132	4.27489	4.10533	4.43515	4.2114	4.3725	4.48402	4.74156	4.69442	4.8388	4.77594	4.93688	4.6079	4.58442	4.5056	4.64674	4.58722	4.47386	4.444
CG31055	FBgn0051055	0.354622	0.251898	0.450234	0.485823	0.04608	0.0268171	1.33649	1.12231	0.457172	0.225239	0.178402	0.0964848	0.0284069	0.103119	0.0349012	0.955324	1.32806	0.80578	0.591535	0.210446	1.38846	2.73266	0.10662	0.0877962	0.156631	0.27477
Cda5	FBgn0051973	0.00129098	0.00500649	2.88908	0.485744	0.00045213	0.00104608	3.34474	0.55577	3.1447	3.16802	3.0918	2.56043	2.61923	2.45148	3.47934	3.60652	3.77588	3.30834	3.24863	3.15985	3.76247	3.38628	3.92307	3.26902	3.08499	3.12106
CG8112	FBgn0037612	0.00312866	0.00961684	2.50464	0.485612	0.399649	0.137845	0.398321	0.115128	4.51721	4.65475	4.47216	2.59588	2.55434	2.71682	5.39456	4.73475	4.97165	4.61679	4.64876	4.70761	4.67583	4.59999	4.71369	4.38869	4.32413	4.61339
CG14011	FBgn0031722	0.346557	0.249599	0.460225	0.485436	0.0617893	0.0325597	1.20909	1.0206	0.286671	0.387786	0.0857621	0.147842	0.04189	0.300005	0.139617	0.96703	1.10988	0.779332	0.551578	0.0724319	1.09414	2.68259	0.045279	0.0831776	0.110942	0.154455
CG17167	FBgn0039941	0.0118906	0.0254301	1.9248	0.485333	0.210895	0.0819223	0.675934	0.21662	3.00937	3.3462	3.02051	2.69717	2.78681	2.69767	3.42758	3.84937	3.55513	3.06218	3.06579	3.25457	3.14411	3.24712	3.63471	2.92211	3.36032	3.43428
SPE	FBgn0039102	0.000139835	0.000971036	3.85438	0.484762	0.00031362	0.000798349	3.5036	0.44126	7.08607	6.9626	7.04891	7.13733	7.25189	7.12943	7.64169	7.40355	7.50663	7.54094	7.50477	7.24738	7.47	7.41042	7.54094	7.7278	7.47	7.54844
CG4839	FBgn0032187	0.0341749	0.0556616	1.46629	0.484751	0.000692049	0.00139941	3.15986	0.918646	2.77687	2.7533	2.77276	2.28926	1.83617	2.09441	3.2946	3.20711	3.25547	3.26332	3.13681	3.41323	3.65888	3.40503	3.99497	3.14736	3.89495	3.98026
OS9	FBgn0042129	0.00126077	0.00491519	2.89936	0.484683	6.78e-05	0.00025218	4.16877	0.687994	5.42051	5.53431	5.53442	4.94366	5.11565	5.07399	5.91212	6.11064	5.92052	5.88184	6.0648	5.67134	6.23768	6.02717	6.28837	6.22493	5.94094	5.85371
CG31730	FBgn0051730	0.277509	0.22161	0.556723	0.484431	0.11044	0.0493496	0.956874	0.733957	1.07471	0.594509	0.66573	0.609355	0.521132	0.844251	0.523261	1.53944	1.72554	0.687513	1.14794	0.175339	1.50495	2.45148	0.580388	0.513385	0.515497	0.376875
CG11368	FBgn0040923	0.00233429	0.00777472	2.63185	0.484175	0.000123131	0.00039637	3.90963	0.700682	6.51283	6.19723	6.26052	5.22649	5.25057	5.05333	6.73509	6.79913	6.88889	6.79071	6.68304	6.53291	7.00544	6.85071	7.21648	7.02615	6.6032	6.8948
pn	FBgn0003116	0.000339536	0.00188641	3.46911	0.484128	0.0025045	0.00341152	2.60128	0.372612	3.65966	3.57741	3.61819	3.85643	3.80758	3.75215	4.32604	3.92661	4.055	4.08424	4.19721	4.29249	3.97545	3.84344	4.15421	4.29788	4.26663	4.40287
CG9406	FBgn0034592	0.302377	0.231597	0.519451	0.48374	0.0361503	0.0227588	1.44189	1.05869	0.205106	0.391595	0.305348	0.0913398	0.310509	0.21374	0.141883	1.08732	1.12407	0.672385	0.806437	0.373265	1.21863	2.61923	0.240257	0.0841689	0.0746444	0.185941
CG3683	FBgn0035046	5.97e-05	0.000528262	4.22403	0.483286	2.06e-06	2.30382e-05	5.68613	0.680053	7.86072	7.77614	7.85519	6.31618	6.40904	6.40476	8.1124	8.50284	8.32667	7.26829	7.14308	7.21417	8.58503	8.4242	8.52299	7.26283	7.15488	7.14826
CG5273	FBgn0040382	2.51e-05	0.000278144	4.60033	0.483046	0.01298	0.010946	1.88673	0.213025	6.53543	6.51373	6.53543	6.90057	7.02615	7.03339	6.98662	6.99123	7.05588	7.2834	7.06818	7.03068	6.71805	6.67991	6.82571	6.96368	6.76672	6.72192
CG1971	FBgn0039881	0.157778	0.157988	0.801954	0.481411	0.0220618	0.0160134	1.65636	0.839701	2.03513	2.06658	1.8368	2.04468	2.17942	2.26529	2.36694	2.58803	2.42777	2.72682	2.61116	2.37012	2.82554	3.72702	1.90506	2.39347	2.32823	2.565
Reg-2	FBgn0016715	0.000164355	0.0010979	3.78422	0.481017	0.0214571	0.0156452	1.66843	0.236136	5.29854	5.27508	5.26382	5.18401	5.36287	5.32808	5.83732	5.65187	5.7913	6.13007	5.91733	5.92082	5.44337	5.37628	5.7262	6.0988	6.20668	6.20668
CG6836	FBgn0036834	0.000487325	0.00248318	3.31218	0.480949	0.00350591	0.00432059	2.4552	0.368107	3.89173	3.95181	3.98781	3.59715	3.55057	3.64268	4.41639	4.39069	4.46711	4.10282	4.02113	4.16919	4.42339	4.00589	4.50639	4.10969	3.99378	4.18809
Nop17l	FBgn0033224	0.00809428	0.0193498	2.09182	0.480419	0.00688749	0.00694171	2.16194	0.493613	4.02214	4.30785	4.09116	4.33489	4.58674	4.33934	4.40342	4.87213	4.58686	4.92391	4.48799	4.53593	4.80089	4.57187	4.52924	4.62187	4.96519	4.7699
SIP3	FBgn0061196	0.332695	0.244336	0.477954	0.479983	0.433379	0.147249	0.363132	1.05351	0.322436	0.286032	0.207247	0.204702	0.28463	0.148302	0.0831776	1.21716	0.955324	0.875882	0.680857	0.414771	1.14794	2.67381	0.154505	0.185155	0.152262	0.342493
cerv	FBgn0030657	0.0288267	0.0492361	1.54021	0.479897	0.158407	0.0653714	0.800226	-0.290767	2.6122	2.19658	2.63705	2.65037	2.66655	2.57608	3.26415	2.76538	2.856	2.69751	2.71835	3.00605	2.04293	1.91137	2.61923	2.81264	2.51013	2.81453
CG12831	FBgn0033141	0.392342	0.266725	0.406335	0.47957	0.0366871	0.0229659	1.43549	1.27031	0.657119	0.229921	0.219124	0.214561	0.0649625	0.206308	0.0891561	1.22661	1.2291	0.639631	0.623225	0.234992	1.94542	2.9008	0.0708595	0.125604	0.161217	0.219496
CG2137	FBgn0033190	0.265597	0.216177	0.575777	0.479159	0.0570782	0.0309057	1.24353	0.863588	0.874589	0.886338	0.650495	0.830354	0.791522	0.679062	0.820176	1.54881	1.47991	1.21297	0.99342	0.770094	1.60752	2.82554	0.569128	0.773935	0.709299	0.630464
Gs1l	FBgn0019982	9.3e-05	0.00072547	4.03152	0.478985	1.1e-05	7.00348e-05	4.95861	0.600219	5.94618	5.91486	5.85064	5.72421	5.73741	5.60532	6.25455	6.38034	6.51373	6.20668	5.99583	6.10465	6.42434	6.43957	6.64843	6.16153	6.0988	6.30685
CG6138	FBgn0032268	0.502925	0.307265	0.298497	0.478596	0.0594748	0.0317844	1.22567	1.44233	1.23229	0.574282	0.307881	0.2036	0.0966867	0.0738152	0.144924	1.69779	1.70753	1.68071	0.983031	0.726695	2.5369	3.66212	0.242429	0.184489	0.15114	0.18755
CG9581	FBgn0031093	8.55e-05	0.000680393	4.06803	0.477958	2.16e-05	0.00011236	4.66555	0.55353	4.55937	4.49087	4.40748	4.91123	5.03431	4.83835	4.97427	5.03431	4.88302	5.32212	5.19568	5.10955	4.91949	5.05398	5.14484	5.59017	5.43317	5.34379
mir-990	FBgn0262307	0.204259	0.185057	0.689819	0.477641	0.252995	0.0950999	0.596888	0.427206	3.02702	1.78207	2.41524	1.55535	2.22435	2.34576	2.80333	3.37952	2.4744	2.84749	2.52266	2.38695	2.92386	2.26293	3.31916	2.40604	2.1359	2.20392
CG6497	FBgn0036704	0.387763	0.26528	0.411434	0.47714	0.0883507	0.0416026	1.05379	0.987477	1.00076	0.340363	0.609355	0.308635	0.249127	0.169563	0.335586	1.57066	1.47566	1.21996	0.979211	0.427944	1.53705	3.02498	0.350881	0.120744	0.140272	0.228953
CG9335	FBgn0032895	0.000106904	0.000802263	3.97101	0.476927	0.000348387	0.000864623	3.45794	0.415916	4.09931	3.86401	3.99378	3.72702	3.80489	3.64703	4.46118	4.46553	4.46118	4.1749	3.99942	4.16109	4.38943	4.24183	4.57359	4.13066	4.17701	4.0167
CG17190	FBgn0038761	0.0334427	0.0547889	1.4757	0.476594	0.121491	0.0531869	0.915456	-0.330753	3.12296	3.2402	3.02019	2.7662	2.6224	2.72703	3.79991	3.19026	3.82296	3.58694	3.19277	3.41381	3.05883	2.39955	2.93271	2.71349	2.89982	3.14411
CG8451	FBgn0031998	0.000287361	0.00166819	3.54157	0.476563	0.00837836	0.00796882	2.07684	0.297592	3.99338	4.13558	4.0399	3.5222	3.49675	3.58673	4.63905	4.4903	4.46919	4.73385	4.54676	4.444	4.27334	4.42152	4.36679	4.52942	4.58262	4.22538
CG14071	FBgn0032312	0.229335	0.198704	0.63953	0.476121	0.0279889	0.0188968	1.55301	0.93923	0.11319	0.109262	0.104322	0.0503125	0.0512959	0.0882226	0.0696466	0.7815	0.903991	0.771771	0.63887	0.236071	1.04402	2.04468	0.0557654	0.0490832	0.0449108	0.114403
CG34336	FBgn0085365	0.0628424	0.0846331	1.20175	0.475787	0.000324152	0.000820252	3.48925	-1.15382	2.51952	1.98368	2.02999	1.95706	1.89417	1.73639	2.71126	2.93551	2.31379	2.56436	2.88998	2.49742	0.742989	0.77512	1.55363	2.13691	1.81005	2.06744
retn	FBgn0004795	0.245087	0.20632	0.61068	0.475675	0.843443	0.247384	0.0739443	-0.0785437	1.06516	1.22279	1.12075	1.54294	1.04083	1.25071	2.82787	1.01387	0.993979	1.6787	1.62826	1.77263	0.837365	0.858717	1.47698	1.36675	1.72318	1.7577
CG14921	FBgn0032345	0.0727784	0.0935187	1.138	0.475236	0.0316966	0.0207039	1.49899	0.587344	1.00304	0.745485	1.10872	0.934824	1.27271	1.06768	1.34021	1.49672	1.44602	1.37091	0.893208	0.90815	1.45588	2.17901	0.984388	0.995925	1.27394	1.11559
wa-cup	FBgn0037502	0.454097	0.289128	0.342851	0.474822	0.039814	0.0242724	1.39996	1.41482	0.619937	0.206821	0.199654	0.104893	0.0709381	0.0853776	0.0396853	1.28786	1.12333	1.12556	0.837365	0.162532	1.99242	3.24366	0.0347776	0.064853	0.201428	0.278725
CG3942	FBgn0038008	0.345307	0.24901	0.461795	0.474815	0.0577388	0.0311582	1.23853	1.01408	0.37858	0.195526	0.0498924	0.185559	0.285942	0.234878	0.0288311	1.09631	0.923301	0.844406	0.597236	0.204626	0.909236	2.628	0.129013	0.267551	0.202278	0.114927
Cyp4d21	FBgn0031925	0.107073	0.122546	0.97032	0.474647	0.484305	0.160765	0.314881	0.196655	6.94871	6.91339	6.83842	5.9529	5.38784	5.60995	7.45402	7.46883	7.2016	7.57579	8.14464	6.8719	7.14308	6.98538	7.16202	7.43401	7.69042	6.93976
CG8519	FBgn0035711	2.61e-05	0.000285227	4.58336	0.474505	0.0014762	0.00239345	2.83085	0.295545	5.00396	5.09762	4.99728	4.53276	4.49623	4.45958	5.50484	5.52819	5.48934	4.56353	4.77794	4.58804	5.29289	5.23361	5.45899	4.8068	4.64774	4.57058
grass	FBgn0039494	0.000648627	0.00305496	3.188	0.474482	0.326363	0.11717	0.486299	0.106349	5.25692	5.39319	5.43986	5.12728	5.29503	5.35296	5.72108	5.84278	5.94955	5.61418	5.58453	5.4871	5.46624	5.41343	5.52935	5.4094	4.95763	5.09593
CG34450	FBgn0085479	0.290371	0.226772	0.537047	0.474271	0.060546	0.0321475	1.21791	0.888148	1.21275	0.566944	0.637858	0.854038	0.856445	0.488157	0.470946	1.71548	1.65393	1.13532	0.923392	0.820599	1.52274	2.73184	0.827415	0.609355	0.433219	0.821853
Adk3	FBgn0042094	0.00376843	0.0110464	2.42384	0.473999	0.00132535	0.00220453	2.87767	0.550342	4.50276	4.29249	4.24292	3.82316	3.90882	3.89776	4.66891	4.9013	4.88997	4.62652	4.59794	4.55875	4.81516	5.27137	4.60268	4.60097	4.62637	4.55437
CG13471	FBgn0036443	0.320409	0.239165	0.494295	0.473752	0.0108357	0.00959123	1.96514	1.37641	0.497191	0.250659	0.54404	0.393297	0.169856	0.466717	0.27842	1.20569	1.22903	1.04885	0.866996	0.431216	2.00631	2.88944	0.525362	0.324834	0.437663	0.240896
CG15556	FBgn0039821	0.000753158	0.00339673	3.12311	0.473689	0.300969	0.109769	0.521478	0.114307	3.59459	3.87742	3.74035	4.05879	3.92833	3.97277	4.38234	4.09174	4.15935	4.44196	4.53169	4.23085	3.79274	3.72206	4.04047	4.46598	4.44196	4.51292
CG2336	FBgn0037455	0.414702	0.274549	0.382264	0.472916	0.0705197	0.0354775	1.15169	1.11092	0.629437	0.336477	0.161886	0.0452363	0.0462745	0.11809	0.0606375	1.18517	1.30074	1.32615	0.75731	0.300174	1.51433	2.89611	0.0501155	0.0892792	0.199654	0.16762
CG30447	FBgn0050447	0.264968	0.215754	0.576807	0.472459	0.0307688	0.0202639	1.51189	0.988627	0.0872085	0.292932	0.361327	0.0854781	0.0879745	0.31184	0.12746	0.939931	1.09145	0.855869	0.609355	0.240555	1.50536	2.10651	0.0954789	0.309346	0.251774	0.227291
CG3408	FBgn0036008	0.00497291	0.0135054	2.30339	0.472119	0.000118013	0.000384638	3.92807	0.769111	2.13691	2.09683	2.07735	2.27581	2.13221	2.29904	2.3528	2.83573	2.53891	2.44698	2.37406	2.4805	2.8592	3.1489	2.61031	2.57421	2.54352	2.8387
CG8993	FBgn0035334	2.29e-07	1.35764e-05	6.64016	0.471909	9.83e-07	1.498e-05	6.00745	0.412118	7.08444	7.04128	7.0034	6.3929	6.42028	6.35083	7.51858	7.50233	7.52395	7.14902	7.17256	7.03557	7.54829	7.362	7.45519	7.39258	7.31742	7.3614
mfrn	FBgn0039561	2.9e-06	6.581e-05	5.5376	0.471726	1.02e-05	6.62637e-05	4.9914	0.416578	5.50622	5.42515	5.41473	5.18733	5.28775	5.2851	5.90866	5.88314	5.96948	5.7179	5.61297	5.47241	5.93054	5.77541	5.88988	5.48139	5.44389	5.46445
Taf12L	FBgn0031623	0.175914	0.169787	0.7547	0.471717	0.0775363	0.0379672	1.11049	0.633088	0.455401	0.411894	0.320449	2.76982	1.93411	2.32039	0.551578	1.21243	0.838887	0.36512	0.112773	0.0774018	1.41154	1.56911	0.106362	0.503302	0.450762	0.637858
CG1983	FBgn0039751	1.17e-05	0.000165153	4.93181	0.4716	0.000181578	0.000538068	3.74094	0.351378	4.87498	4.91123	4.97165	5.18617	5.11358	5.16133	5.32812	5.53266	5.31188	5.36732	5.35984	5.38131	5.30884	5.11358	5.38957	5.34546	5.33138	5.32808
CG7386	FBgn0035691	0.141672	0.146752	0.848716	0.47147	0.93787	0.267993	0.0278574	-0.0238554	1.33086	1.00478	1.46283	1.34768	0.910982	1.50495	2.15774	2.13034	0.924801	1.13796	1.30465	1.27629	1.1083	0.945266	1.67334	1.4344	1.31835	1.4999
CG11275	FBgn0034706	6.72e-05	0.000578439	4.17263	0.471341	0.282007	0.103949	0.54974	0.0892349	4.40248	4.34364	4.41534	4.0559	4.36773	4.27188	4.86852	4.86134	4.84564	4.85635	4.89899	4.67583	4.42958	4.42902	4.57058	4.77352	4.68457	4.58722
Gpdh	FBgn0001128	0.00103225	0.00430212	2.98622	0.471168	3.07e-06	3.01893e-05	5.51286	0.89412	8.27987	7.9453	7.91929	6.78548	6.52717	6.54721	8.36042	8.46949	8.72806	7.50293	7.46423	7.44637	8.96367	8.88032	8.98283	7.47145	7.56163	7.3882
CG7903	FBgn0039730	1.34e-05	0.00018004	4.8729	0.470575	7.54e-05	0.000274058	4.12263	0.392128	4.30473	4.29005	4.19702	4.58722	4.57679	4.49653	4.84703	4.68171	4.67478	4.82786	4.82173	4.69996	4.63795	4.54039	4.78985	4.85832	4.7763	4.7393
CG15256	FBgn0028880	0.35378	0.251744	0.451267	0.470189	0.0437494	0.0258942	1.35903	1.09827	0.341016	0.36512	0.152698	0.0945977	0.0440689	0.150773	0.0581664	1.17027	1.04096	0.893964	0.367852	0.145299	1.41237	2.63621	0.105068	0.0864742	0.0391973	0.130054
CG2656	FBgn0037478	0.00112955	0.00456717	2.94709	0.469648	0.00158646	0.00251157	2.79957	0.448585	4.16919	4.13307	4.43414	7.15759	7.32301	7.12331	4.76815	4.67284	4.70435	6.67787	6.70865	6.45033	4.76478	4.5301	4.78727	6.1278	6.24932	5.91312
CG34452	FBgn0085481	0.315692	0.237438	0.500736	0.468708	0.291221	0.106814	0.535777	-0.494203	1.28888	1.78728	1.50138	2.06868	1.47991	1.63974	3.31267	1.42628	1.24471	1.7869	2.01452	1.72683	0.804848	0.703762	1.58632	1.80703	2.10584	2.37406
RhoGAP5A	FBgn0029778	0.0210084	0.0388914	1.67761	0.468702	0.267379	0.0994765	0.572873	0.205385	2.44974	2.56897	2.53695	2.65374	2.62876	2.58098	3.1659	2.91077	2.8851	2.86659	2.82342	2.97946	2.84452	2.1886	3.1387	3.02866	2.84788	2.95567
CG11149	FBgn0031732	0.227386	0.19765	0.643236	0.468571	0.814795	0.240851	0.0889516	0.0881911	2.8379	3.10445	3.02537	1.8295	1.84022	1.85906	2.70049	3.86535	3.80758	3.39093	3.28467	3.6997	2.98664	2.71986	3.52579	2.70417	3.96339	4.02534
Jon25Bi	FBgn0020906	0.460869	0.291406	0.336423	0.468032	0.136671	0.0583122	0.864324	-0.979951	6.74921	7.70723	6.19474	1.7668	1.00076	2.70998	8.31049	6.99557	6.74921	6.40476	5.19923	5.3938	5.31716	6.62862	5.76554	3.91119	4.55465	3.1278
CG43156	FBgn0262686	0.282808	0.224139	0.548508	0.46622	0.427879	0.145779	0.368679	-0.340232	1.2191	1.70496	0.844251	1.64502	2.37382	1.86501	2.63447	0.905435	1.62707	0.803935	1.72318	1.4859	0.650654	0.694779	1.40218	1.39982	0.947232	0.998634
CG31128	FBgn0051128	0.342609	0.248139	0.465201	0.466089	0.0406652	0.02465	1.39078	1.0819	0.37635	0.410773	0.0725296	0.077375	0.0796831	0.18251	0.110483	0.994539	1.1529	0.886995	0.888874	0.221436	1.49504	2.52411	0.0862139	0.151497	0.0634001	0.158466
CG14806	FBgn0029594	1.68e-05	0.000210794	4.77469	0.465579	1.3e-05	7.76062e-05	4.88606	0.478081	4.94177	4.7477	4.83835	4.43994	4.34477	4.31383	5.35187	5.32212	5.25057	4.86852	4.68171	4.83448	5.35818	5.2276	5.37628	5.16978	4.99253	5.04924
CG31093	FBgn0051093	0.222298	0.194705	0.653064	0.465183	0.0258391	0.0178915	1.58772	0.918685	0.11809	0.263836	0.252779	0.498951	0.265097	0.25985	0.419019	0.947548	0.663687	0.618182	0.275452	0.0908114	1.12883	2.1288	0.133139	0.374219	0.323417	0.156631
CG7083	FBgn0035877	6.27e-06	0.00010697	5.20273	0.465123	0.0166026	0.0130862	1.77982	0.170056	5.14909	5.13666	5.23361	5.16775	5.0958	5.19371	5.66044	5.68308	5.57121	5.16026	5.26382	5.21668	5.29076	5.24726	5.49151	5.23242	5.08952	5.15404
CG18522	FBgn0038347	0.0378621	0.0596079	1.4218	0.464945	0.133903	0.0573365	0.87321	0.320374	6.82723	7.0676	6.91494	6.53912	6.40476	6.53107	7.07534	7.70673	7.42254	7.82605	7.54448	7.96971	7.19116	7.1621	7.41763	7.08444	7.80715	7.79237
CG2100	FBgn0037369	4.17e-06	8.27519e-05	5.37986	0.464109	1.22e-06	1.69234e-05	5.91364	0.522523	3.40524	3.39703	3.39703	4.11596	4.15421	4.03056	3.78276	3.87529	3.93358	4.3017	4.11052	4.18338	3.95637	3.98362	3.82689	4.37197	4.24422	4.26267
levy	FBgn0034877	1.84e-06	4.69186e-05	5.73518	0.4633	5.42e-07	9.91283e-06	6.266	0.520085	10.1005	10.0141	10.0751	8.72806	8.77733	8.71744	10.4018	10.5889	10.5889	9.77035	9.67038	9.67038	10.6038	10.5889	10.5573	9.92158	9.78602	9.7567
CG4592	FBgn0032162	0.0122874	0.0260537	1.91054	0.463148	0.588339	0.187437	0.230372	0.0874998	4.15092	4.44516	4.27487	4.11208	3.76171	3.93261	5.12707	4.55401	4.57932	4.32604	4.34598	4.48565	4.53208	4.20623	4.39515	4.2777	4.31483	4.59999
CG10802	FBgn0029664	4.54e-05	0.000428083	4.34294	0.462758	8.15e-07	1.32215e-05	6.08884	0.690511	4.89899	4.83064	4.77418	4.39982	4.42958	4.36101	5.30376	5.3496	5.23873	4.38133	4.39382	4.29338	5.65752	5.30409	5.61374	4.43994	4.417	4.35943
CG4908	FBgn0032195	0.00118654	0.00471322	2.92572	0.46257	0.000649996	0.00133793	3.18709	0.500165	2.55001	2.57775	2.62463	2.43061	2.35703	2.45215	3.13982	3.05125	2.94904	2.72327	2.68537	2.5369	3.10722	2.78534	3.36032	3.24216	3.30501	3.21063
CG14880	FBgn0038422	0.00797213	0.0191738	2.09843	0.461813	0.0207283	0.0152929	1.68344	0.386955	4.17958	3.91465	3.80696	3.58478	3.25565	3.18734	4.47216	4.30935	4.50512	4.2557	4.02655	3.99378	4.22242	4.20551	4.63413	4.27766	4.0559	4.29788
Npc2h	FBgn0039801	0.00526085	0.0141528	2.27894	0.461443	0.00645512	0.00661035	2.1901	0.446442	6.40351	6.45033	6.43339	4.93808	4.90979	4.89716	7.12943	6.57159	6.97053	6.84293	6.86235	6.54123	6.90359	6.7972	6.92576	6.61272	6.56733	6.22493
Cyp4e2	FBgn0014469	6.6e-06	0.000109835	5.18046	0.461236	3.18e-05	0.000145865	4.49757	0.392813	5.87032	5.98179	6.03636	5.85389	5.77223	5.94094	6.40351	6.42415	6.44452	6.83663	6.94735	6.7443	6.37609	6.29694	6.39389	6.88515	6.81126	6.9626
CG42758	FBgn0261816	0.523469	0.315308	0.281109	0.461109	0.0591847	0.0317002	1.22779	1.46234	0.514632	0.701143	0.236806	0.32357	0.247299	0.168025	0.174846	1.02618	1.63488	1.55437	0.938439	0.287632	1.92261	3.79816	0.118849	0.293185	0.242504	0.637812
Mst36Fa	FBgn0086681	0.178832	0.171571	0.747555	0.461071	0.0810002	0.0391757	1.09151	0.615182	1.22522	1.36917	1.00381	1.42816	1.18001	0.974818	1.51604	1.75226	1.71311	1.57476	1.46603	1.61248	1.62662	2.79142	1.0257	1.26793	1.58548	1.43906
CG16984	FBgn0062517	0.345269	0.24901	0.461842	0.460962	0.0725792	0.0362382	1.13919	0.92349	1.60695	1.59723	1.40663	1.23245	1.27335	1.57924	1.49504	2.21461	2.28404	2.12626	1.89503	1.44735	2.7131	3.5748	1.09338	1.17128	0.990747	1.36675
CG31676	FBgn0051676	9.51e-05	0.000737003	4.02182	0.459917	0.0124905	0.0106268	1.90342	0.235725	5.30376	5.43317	5.56802	5.4116	5.50334	5.48031	5.78459	5.8565	6.04361	5.8565	5.84784	5.73819	5.76589	5.56638	5.67985	5.81422	5.65857	5.72821
CSN1a	FBgn0028838	0.381851	0.262816	0.418106	0.459731	0.0604449	0.0321294	1.21864	1.04944	0.436463	0.238326	0.170527	0.101613	0.0480243	0.041109	0.0637009	0.980488	1.18032	0.91751	0.72263	0.250413	1.20502	2.73715	0.0514631	0.152088	0.126052	0.173993
CG7208	FBgn0038575	0.217569	0.192231	0.662403	0.459439	0.0355671	0.0225009	1.44895	0.835816	0.319812	0.309384	0.211914	0.171011	0.388014	0.335005	0.200568	0.968184	1.05067	0.806186	0.598273	0.36915	0.968327	2.09126	0.288968	0.28825	0.256367	0.437975
CG8550	FBgn0033742	0.015484	0.0310558	1.81012	0.459241	0.000157374	0.000481975	3.80307	-0.881378	3.60906	3.73192	3.56134	3.90834	4.07373	4.00054	4.36533	3.835	4.07971	4.13438	4.15031	3.94904	2.73961	2.40396	3.11461	3.5222	3.28099	3.4322
Fie	FBgn0026592	1.72e-05	0.000214113	4.76447	0.458868	7.06e-07	1.18551e-05	6.1512	0.627026	5.05333	5.08351	4.88997	4.54039	4.69619	4.67386	5.4471	5.42064	5.53568	5.24286	5.30666	5.12804	5.62922	5.56239	5.71627	5.28775	5.21848	5.1545
CG6752	FBgn0038296	0.246575	0.207117	0.608051	0.458732	0.0187281	0.0142228	1.72751	1.02299	1.09846	0.602054	0.920696	0.772857	0.697218	0.864313	0.802075	1.54605	1.64928	1.33058	1.12978	0.825143	1.80144	2.90105	0.987679	0.762482	0.694715	0.843871
CG30194	FBgn0050194	0.0493316	0.0718589	1.30687	0.458611	0.165615	0.0676942	0.7809	-0.309676	1.95631	2.21432	1.98368	1.72527	1.6169	1.57143	3.04867	2.36642	2.11506	2.45342	2.56779	1.99601	1.54009	1.82046	1.86474	1.80144	2.0335	1.88752
vri	FBgn0016076	0.00320079	0.00979678	2.49474	0.458361	0.0363493	0.022844	1.4395	0.2941	6.37609	6.32048	6.19172	6.58308	6.44479	6.38691	7.04891	6.52087	6.69358	6.90741	6.92845	6.88668	6.4639	6.61636	6.69032	6.78669	6.4338	6.71723
CG1265	FBgn0035517	8.43e-07	2.83562e-05	6.07417	0.457708	9e-08	2.79733e-06	7.04576	0.562495	6.92333	6.81126	6.78669	5.76771	5.77054	5.73383	7.22893	7.30407	7.3614	6.25135	6.18164	6.29196	7.43304	7.33063	7.44509	6.37023	6.43359	6.51022
l(2)35Di	FBgn0001989	2.59e-05	0.000284352	4.5867	0.457404	2.09e-05	0.000110318	4.67985	0.467581	7.14902	7.11041	7.11841	5.89572	6.0988	6.07826	7.47145	7.65751	7.6211	6.77224	6.81419	6.61356	7.6211	7.59091	7.56858	7.02221	6.88253	6.84293
CG30411	FBgn0050411	0.0665487	0.0880667	1.17686	0.457298	0.245756	0.0928759	0.609496	0.276588	3.15985	3.51135	3.50788	2.71768	2.36843	2.30419	3.46331	4.13852	3.94915	3.8536	3.88142	3.89173	3.58781	3.40782	4.01322	3.26044	3.97074	3.90292
CG2453	FBgn0030460	1.55e-05	0.000198687	4.80967	0.456801	0.000299012	0.000774203	3.52431	0.330202	4.65223	4.6079	4.73507	5.73846	5.90998	5.72201	5.16026	5.12183	5.08351	5.86797	5.84463	5.84498	5.02936	4.83372	5.12272	5.9833	5.93792	5.95383
CG31800	FBgn0051800	0.0010469	0.00433272	2.98009	0.45632	0.00124813	0.00211941	2.90374	0.445774	4.61339	4.30897	4.50712	4.50021	4.29878	4.36714	5.09828	4.98426	4.71591	4.57112	4.80925	4.59794	4.94963	4.82464	4.99253	4.70515	4.67162	4.57969
CG33080	FBgn0053080	3.86e-06	7.89113e-05	5.41341	0.455863	0.00834262	0.00793745	2.0787	0.180085	4.81516	4.89654	4.83331	4.22291	4.31844	4.17747	5.3496	5.25692	5.30607	5.38957	5.24813	5.16179	5.04225	4.97647	5.06655	5.03769	5.13079	5.1736
CG12001	FBgn0037265	0.00244057	0.00802924	2.61251	0.455694	0.000663347	0.00135763	3.17826	0.543104	4.47246	4.77183	4.61285	5.32534	5.41692	5.38784	5.06946	5.29885	4.85591	5.15057	5.2257	5.04349	5.31844	5.18376	4.98426	5.13754	5.27387	5.00751
CG34222	FBgn0250822	0.445894	0.286302	0.350768	0.454767	0.0900265	0.0422048	1.04563	1.06389	0.923346	0.264224	0.363031	0.115293	0.122847	0.181131	0.419112	1.32966	1.16613	1.1625	1.03118	0.307293	1.3827	3.22592	0.133657	0.313421	0.253686	0.300174
Trf4-2	FBgn0039251	0.366685	0.256744	0.435707	0.454375	0.0518441	0.0289849	1.2853	1.0455	0.129535	0.362426	0.226899	0.125461	0.133327	0.393775	0.0477291	0.969014	1.06524	1.03305	0.545142	0.15572	1.1793	2.58524	0.0908114	0.240585	0.290638	0.320056
CG15147	FBgn0032654	0.386062	0.264562	0.413343	0.454177	0.0685746	0.0347604	1.16384	1.01014	0.582175	0.188278	0.298565	0.178402	0.0501155	0.0423363	0.0668808	1.11319	1.25148	1.20502	0.660611	0.463304	1.27271	2.70516	0.121568	0.0471388	0.086192	0.18128
CG8066	FBgn0038243	0.00156809	0.00575637	2.80463	0.454069	0.00380757	0.00456309	2.41935	0.399506	4.46598	4.5164	4.42866	4.87213	4.65544	4.548	4.81989	5.08782	4.86553	5.06777	5.08163	5.40886	4.90449	4.74344	4.96162	5.29503	5.31689	5.49859
CG9147	FBgn0031774	4.94e-06	9.15223e-05	5.30627	0.454015	0.000300447	0.000776519	3.52223	0.292449	3.09118	2.94062	3.0344	2.84648	2.80467	2.81786	3.39391	3.53245	3.50188	3.1708	3.07749	3.16976	3.29357	3.43018	3.2198	2.99917	2.86579	2.90105
CG3499	FBgn0034792	3.33e-06	7.17896e-05	5.47756	0.45354	5.19e-07	9.69573e-06	6.28483	0.541269	5.09343	5.07377	5.06655	5.16667	5.19371	5.15191	5.5305	5.56886	5.495	5.67134	5.53744	5.47766	5.57973	5.7157	5.56212	5.57417	5.42859	5.39129
CG12338	FBgn0033543	7.88e-06	0.000124579	5.10347	0.453236	6.2e-09	4.81158e-07	8.20761	0.877618	5.01058	4.94746	4.93688	5.07377	5.22221	5.06105	5.49886	5.41282	5.34295	5.39716	5.36135	5.42544	5.86403	5.73065	5.93309	5.91064	5.92473	6.05238
Pfk	FBgn0003071	0.00017319	0.00113927	3.76148	0.452961	2.24e-06	2.40899e-05	5.64975	0.712008	7.24575	7.17256	7.14725	6.13007	6.21125	6.1533	7.43304	7.76361	7.7278	6.76194	6.51373	6.508	7.9241	7.85819	7.91929	6.53437	6.4211	6.40783
CG15742	FBgn0030462	0.263008	0.215108	0.580031	0.45228	0.0298874	0.0198335	1.52451	0.948433	0.13354	0.287507	0.434241	0.266654	0.344625	0.453061	0.361904	1.06082	0.789405	0.746388	0.508252	0.355267	1.25266	2.29167	0.156255	0.185861	0.202576	0.209696
CG30177	FBgn0050177	0.318394	0.238298	0.497035	0.45195	0.0399377	0.0243168	1.39862	1.0001	0.41636	0.301924	0.0388347	0.140272	0.0408263	0.0353678	0.0513755	1.00817	1.05343	0.761927	0.771622	0.0701464	1.41329	2.2457	0.0984216	0.0805267	0.107035	0.150567
CG12963	FBgn0034031	0.122409	0.133772	0.912187	0.451908	0.0664723	0.0340536	1.17736	0.54884	3.29613	3.37398	3.42524	2.16716	2.30123	2.39347	3.29265	4.23765	3.92078	3.76324	3.85511	4.2079	3.86561	3.7456	4.13066	3.29669	4.35567	4.18398
CG43249	FBgn0262894	0.369143	0.257811	0.432805	0.451784	0.158824	0.0654776	0.799084	0.727432	1.20648	0.23916	0.229687	0.224141	0.241685	0.304052	0.379836	0.955667	1.69518	0.939131	0.950868	0.650967	1.0633	2.53122	0.263109	0.203371	0.294654	0.140007
CoVIII	FBgn0263911	0.000627156	0.00298346	3.20262	0.451408	0.000285964	0.000748172	3.54369	0.496906	9.39671	9.32809	9.4686	8.04312	8.04312	8.12114	9.54336	10.0383	9.96596	8.96848	8.85079	8.98283	9.91319	9.85775	9.91319	9.17789	9.14259	9.07849
mia	FBgn0014342	0.0322054	0.0531844	1.49207	0.451392	0.337304	0.120252	0.471979	0.186277	1.2571	1.70753	1.50181	1.93879	1.88902	1.78	2.28615	1.72051	1.81395	2.21984	2.1292	2.27872	1.42963	1.53532	2.06031	2.18014	2.2289	2.56323
Tengl1	FBgn0051682	0.472931	0.295799	0.325202	0.45124	0.0621739	0.0326914	1.20639	1.25218	0.963353	0.787959	0.558243	0.533741	0.45131	0.568448	0.43626	1.61157	1.61544	1.32959	0.756929	0.286768	2.18384	3.53027	0.351975	0.327057	0.380869	0.54307
CG14269	FBgn0029658	0.315765	0.237455	0.500636	0.451024	0.0863089	0.0409298	1.06394	0.804915	0.518638	0.179873	0.171011	0.172064	0.0804972	0.288115	0.110946	0.770405	1.34124	0.689304	0.62672	0.411816	0.923413	2.27416	0.0866936	0.15248	0.126149	0.207998
CG33669	FBgn0053669	0.470417	0.294888	0.327517	0.450856	0.0600835	0.0320203	1.22124	1.25557	0.432506	0.475491	0.252287	0.114543	0.121864	0.258384	0.19762	1.21996	1.09527	0.637858	0.917194	0.512748	1.30346	3.49089	0.132647	0.103958	0.322826	0.156419
CG30197	FBgn0050197	0.000189819	0.00122155	3.72166	0.450703	0.551042	0.178124	0.258815	-0.0522122	8.12918	7.96971	8.12114	8.65518	8.41759	8.58854	8.64895	8.50884	8.41435	8.72806	8.81715	8.7008	7.97202	7.97202	8.11935	8.72806	8.50884	8.74367
CG12438	FBgn0032065	0.272965	0.219989	0.563893	0.45067	0.034252	0.0219585	1.46531	0.936733	0.307232	0.0722532	0.0679129	0.0724319	0.0741835	0.118126	0.102611	0.634858	1.06194	0.609355	0.370573	0.39355	0.997676	2.17989	0.0800284	0.218986	0.0599504	0.0541744
CG30415	FBgn0250838	0.00075819	0.00340207	3.12022	0.450442	0.000728647	0.00144886	3.13748	0.452738	9.59284	9.4253	9.56737	8.42849	8.53086	8.57475	9.71816	10.1181	10.1005	9.4253	9.28979	9.38674	10.0957	9.95818	9.88986	9.58379	9.4362	9.38769
CG6421	FBgn0025827	4.87e-05	0.000451127	4.31247	0.449603	0.0003015	0.000777567	3.52071	0.36603	6.5945	6.53437	6.49548	6.4585	6.508	6.48715	6.90359	7.04891	7.02065	7.00825	7.04616	6.8948	6.92333	6.75936	7.03975	7.17256	6.94735	7.03733
Aldh-III	FBgn0010548	5.95e-05	0.000527477	4.22548	0.449513	0.000570524	0.00121891	3.24373	0.345968	6.03623	6.13604	6.05759	5.46486	5.36929	5.42544	6.6032	6.43607	6.53912	6.42769	6.33712	6.10173	6.51022	6.33701	6.42053	6.368	6.31884	6.27755
CG18815	FBgn0042138	0.000104256	0.000786123	3.9819	0.449482	0.000730126	0.00144886	3.1366	0.356636	5.57035	5.60808	5.48377	5.39456	5.53442	5.49225	6.20462	5.84063	5.96539	5.93776	5.79223	5.76554	5.96948	5.85172	5.91091	5.85551	5.82308	5.88988
CG5778	FBgn0038930	0.00133324	0.0051326	2.87509	0.449382	0.0521057	0.0290746	1.28311	0.233121	8.46949	8.40184	8.45772	9.46322	9.46322	9.55952	8.9955	8.69392	8.98778	9.00829	9.2719	9.2719	8.61661	8.56102	8.85079	9.35234	9.07849	9.34651
mRpL14	FBgn0040389	4.04e-05	0.000398361	4.39362	0.449107	4.96e-05	0.000201447	4.30452	0.439348	4.67039	4.58977	4.58517	4.65093	4.81455	4.87472	5.04733	5.02781	5.1175	4.98208	5.07399	5.05692	5.09621	4.98141	5.08574	5.40487	5.1132	5.22759
fzr2	FBgn0034937	0.233076	0.200561	0.632502	0.449082	0.0143279	0.0117012	1.84382	1.02307	0.907745	0.573436	0.626017	0.927199	0.798904	0.828292	0.680211	1.4577	1.31653	1.373	1.06194	0.8309	1.64835	2.69227	0.835786	0.752884	0.681414	0.659573
CG6000	FBgn0039145	6.04e-05	0.000531482	4.21896	0.448557	0.00715254	0.00713373	2.14554	0.241086	5.07308	5.07896	4.99027	4.13614	4.04481	3.98454	5.47766	5.41823	5.59209	5.14667	5.0623	5.07896	5.28694	5.15479	5.42383	5.17404	4.93934	5.04822
yps	FBgn0022959	0.000179116	0.00116928	3.74687	0.448336	1.74e-05	9.7204e-05	4.75945	0.57726	6.61272	6.42906	6.43502	7.80715	7.90727	7.84503	6.76194	6.99844	7.06144	7.62291	7.50293	7.54937	7.03185	7.03068	7.14605	7.60251	7.41042	7.35152
Rtnl2	FBgn0015831	0.446033	0.286302	0.350633	0.448161	0.0192714	0.0145164	1.71509	1.53635	0.143449	0.417046	0.351434	0.211687	0.295217	0.532509	0.0880469	1.24128	0.927082	1.2119	0.389978	0.149745	2.37233	2.97946	0.169198	0.546281	0.371605	0.353916
CG15676	FBgn0034651	0.381259	0.262561	0.41878	0.447894	0.0726676	0.0362697	1.13866	0.969509	0.321854	0.438575	0.339821	0.225239	0.494407	0.385337	0.168877	0.913433	1.36162	0.830354	0.788769	0.282367	1.17968	2.71349	0.115607	0.359454	0.295334	0.351975
CG31804	FBgn0051804	0.496488	0.304826	0.304091	0.447292	0.0602669	0.0320696	1.21992	1.32275	0.908392	0.351975	0.341343	0.0782726	0.0810593	0.124947	0.112141	1.54256	1.28888	1.36824	0.7815	0.270588	2.17674	3.30581	0.0874186	0.154098	0.19077	0.0589619
ea	FBgn0000533	0.00454984	0.0125534	2.342	0.446868	0.955728	0.271519	0.0196657	0.00728004	3.47372	3.76273	3.57791	3.9041	4.08361	4.0298	4.17265	3.97214	4.01017	4.18865	4.12964	3.85562	3.64942	3.34377	3.84301	4.02214	3.80419	3.94662
tst	FBgn0039117	0.0135339	0.0281162	1.86858	0.446539	0.147588	0.0619031	0.830949	0.23904	2.17069	2.19106	2.30085	2.51089	2.59588	2.46327	2.8081	2.5379	2.65622	2.63897	2.58887	2.75586	2.43191	2.0517	2.89611	2.96992	2.92091	2.95932
CG34287	FBgn0085316	0.211722	0.189216	0.674234	0.445979	0.0704622	0.0354625	1.15204	0.671127	0.52709	0.322826	0.312514	0.29459	0.36699	0.358964	0.577111	1.06166	0.861593	1.00304	0.584863	0.466204	0.72759	2.10909	0.339126	0.319812	0.221277	0.402206
CG10672	FBgn0035588	7.09e-05	0.00060048	4.14935	0.445585	0.0128298	0.0108384	1.89178	0.220021	5.52835	5.46073	5.47058	5.33266	5.27773	5.26811	6.06549	5.86689	5.86403	6.18464	6.13942	6.05204	5.763	5.52819	5.82853	6.24647	6.20061	6.0988
CG9172	FBgn0030718	0.000278659	0.00163165	3.55493	0.445275	8.47e-05	0.000299151	4.07212	0.510164	9.0279	9.08224	9.03986	8.81933	8.9356	8.88032	9.38016	9.65893	9.44674	9.84507	9.7536	9.59789	9.69877	9.44674	9.53498	9.91319	9.77881	9.69356
Adgf-B	FBgn0036751	0.344918	0.248995	0.462284	0.444784	0.0411436	0.0248162	1.3857	1.03467	0.381218	0.0787004	0.0744937	0.0352612	0.0816939	0.0633573	0.0454408	1.02297	0.800349	0.761427	0.650495	0.318053	1.03678	2.51369	0.0879384	0.0348902	0.064839	0.0313267
Tk	FBgn0037976	0.0964749	0.113625	1.01559	0.4447	0.674302	0.208195	0.171146	0.106214	2.98532	3.19852	3.07452	2.59311	2.45037	2.81774	3.04641	3.8468	3.69925	3.52703	3.64809	3.75565	3.03181	2.85135	3.69385	3.03507	3.68321	3.48397
CG11752	FBgn0030292	0.000171778	0.00113155	3.76503	0.444646	1.66e-05	9.38301e-05	4.77989	0.572503	7.63706	7.55225	7.66351	6.34882	6.3061	6.33404	7.87314	8.20123	8.1124	7.362	7.15917	7.30931	8.20123	8.13401	8.2351	7.71706	7.54448	7.47393
TFAM	FBgn0038805	1.38e-05	0.000183637	4.86012	0.444154	1.11e-05	7.02045e-05	4.95468	0.45389	5.71627	5.65187	5.68174	5.02547	4.90771	4.83172	6.14247	6.13815	6.10173	5.86478	5.74451	5.69867	6.18998	6.0218	6.19977	5.69252	5.52309	5.63858
Ugt36Bc	FBgn0040260	0.0208147	0.0385629	1.68163	0.44401	0.173931	0.0703965	0.759623	0.241334	6.12093	5.94804	6.10699	5.66852	5.49225	5.79534	6.01214	6.79584	6.70001	6.45286	6.31884	6.42053	6.34546	6.1083	6.4462	6.07618	6.0501	6.0218
CG11454	FBgn0031224	0.000191548	0.0012295	3.71772	0.443412	0.00152499	0.00244631	2.81673	0.342042	3.83616	3.88635	3.82819	4.23499	4.26016	4.15475	4.31383	4.28248	4.28462	4.16331	4.306	4.43515	4.31471	4.02761	4.2345	4.39069	4.15616	4.39249
CG13404	FBgn0030559	0.00407423	0.0116057	2.38995	0.443203	0.790971	0.235729	0.101839	0.0339373	3.72901	3.46783	3.63329	3.47951	3.37952	3.32195	4.01608	4.16229	3.98137	3.57106	3.94627	3.72702	3.6788	3.39111	3.86204	3.74641	3.70735	3.5091
CG2811	FBgn0035082	0.00270334	0.00860507	2.5681	0.443116	0.401905	0.138376	0.395877	0.102313	4.31623	4.29338	4.34829	3.9512	4.00054	3.94413	4.5896	4.76332	4.93432	4.50639	4.5965	4.76332	4.49623	4.13066	4.63795	4.52653	4.58686	4.70091
CG9740	FBgn0037669	0.00106419	0.00437662	2.97298	0.443109	0.0116804	0.0101389	1.93254	0.3074	2.94391	2.93784	2.93223	3.06606	3.21019	3.28467	3.58311	3.32025	3.23995	3.24216	3.09874	3.24792	3.05883	3.22706	3.45029	3.28911	3.23115	3.38507
cbt	FBgn0043364	0.0134068	0.0279378	1.87267	0.443019	0.00344062	0.00425632	2.46336	0.555403	5.35409	5.39545	5.3625	5.01169	5.15909	5.08351	5.64032	5.94804	5.85274	5.45781	5.40669	5.20826	6.19692	5.72943	5.8519	4.78571	5.10434	5.42956
Ugt86Dh	FBgn0040252	0.319048	0.238449	0.496144	0.443014	0.351972	0.12442	0.453492	0.412686	3.10683	3.40766	3.97042	1.96553	1.62871	2.16467	3.16164	4.45052	4.20179	3.52351	3.21486	4.02441	3.96174	3.34423	4.417	2.8563	3.92661	4.08056
CG15412	FBgn0031528	0.000257678	0.00153727	3.58892	0.442888	0.00013889	0.000437295	3.85733	0.475696	6.18309	6.23514	6.20822	4.86056	4.98208	4.79661	6.53787	6.82486	6.59239	5.45298	5.30784	5.26811	6.73509	6.51932	6.79913	5.13211	5.13294	5.02476
capu	FBgn0000256	0.00589346	0.0153497	2.22963	0.442395	0.00237612	0.00329217	2.62413	0.507966	3.31267	3.05751	3.24792	2.81567	2.64778	2.80016	3.48115	3.81045	3.65368	3.48212	3.44825	3.45716	3.56692	4.05826	3.51682	3.26389	3.30418	3.49175
CG5254	FBgn0040383	0.00745855	0.0182816	2.12735	0.441804	0.532682	0.173439	0.273532	-0.0883521	4.92469	5.29503	5.18045	4.77416	4.78739	4.85267	5.6477	5.46335	5.61454	5.72943	5.67596	5.75139	4.97439	4.83982	5.32091	5.31188	5.73222	5.73819
CG1314	FBgn0031134	0.360945	0.254711	0.442559	0.441475	0.0707494	0.0355471	1.15028	0.921634	0.444936	0.450762	0.153011	0.0434937	0.0985554	0.187073	0.150567	1.00742	1.21514	0.861593	0.61561	0.236806	1.17339	2.535	0.105225	0.0866936	0.0772938	0.250659
Acon	FBgn0010100	0.000180162	0.00117069	3.74434	0.441399	1.5e-06	1.87267e-05	5.82391	0.72421	10.7188	10.6038	10.6187	8.68546	8.62149	8.63923	11.0317	11.2023	11.0317	10.236	10.1411	9.83315	11.3713	11.3713	11.3713	10.1726	10.1043	10.0699
CCHa1	FBgn0038199	0.0079561	0.0191449	2.0993	0.441334	0.0368884	0.0230416	1.43311	0.326021	3.5043	3.19433	3.15949	3.10765	3.3462	3.34959	3.70735	3.72534	3.74942	3.74248	3.67508	3.88155	3.54167	3.34391	3.9506	3.49619	3.61882	3.7056
CG1885	FBgn0030066	0.000157249	0.00105789	3.80341	0.441121	0.770929	0.230927	0.112986	-0.0242795	3.25817	3.25803	3.19913	3.57002	3.68145	3.54059	3.81074	3.66956	3.55839	3.82842	3.63059	3.63107	3.27201	3.04702	3.32347	3.4829	3.40452	3.49769
CG30271	FBgn0050271	0.0763687	0.0967172	1.11708	0.441116	0.00297448	0.00383865	2.52659	0.84425	2.06545	2.02908	2.27176	1.87082	2.14186	1.75603	2.49116	2.60852	2.58995	2.37574	2.0389	1.81729	2.95898	3.52579	2.41427	2.09384	2.22655	1.96259
CG7716	FBgn0035800	0.471531	0.29521	0.32649	0.440801	0.0757295	0.0373693	1.12073	1.1526	0.625623	0.443893	0.186356	0.0245443	0.0520407	0.236071	0.0298023	1.23362	1.31485	1.20648	0.65619	0.186477	1.61572	3.07217	0.0257826	0.0771607	0.158686	0.153915
CG2574	FBgn0030386	0.391999	0.26659	0.406715	0.440478	0.0458357	0.0267399	1.3388	1.10482	0.544724	0.335879	0.0677678	0.0718858	0.0735386	0.0583521	0.102429	0.987394	1.17998	0.810172	0.79647	0.212866	1.49251	2.6905	0.0798122	0.14385	0.230059	0.246197
CG15065	FBgn0040734	0.0729484	0.093585	1.13698	0.44031	0.318085	0.114787	0.497457	-0.233378	7.27034	7.24437	7.49398	9.48934	9.71816	9.74007	8.30757	7.42826	7.59379	7.71706	8.42711	8.22426	7.09307	6.91633	7.29916	7.62425	7.31241	7.50663
CG12681	FBgn0029730	0.347989	0.249919	0.458434	0.440066	0.0281059	0.0189402	1.5512	1.12472	0.306361	0.0401339	0.126052	0.0382134	0.039378	0.132971	0.0493977	0.81361	0.929738	0.30396	0.667209	0.309136	1.29526	2.50948	0.0419742	0.0375005	0.136925	0.249085
TpnC47D	FBgn0010423	0.0833406	0.10315	1.07914	0.439577	0.321092	0.11561	0.493371	0.240882	2.99871	2.91508	3.09771	2.48468	2.48017	2.56436	3.74414	2.93138	3.65471	2.83573	2.67772	2.94323	3.42614	2.8428	3.46521	2.54829	3.037	3.28013
CG42566	FBgn0260768	0.0472647	0.0696496	1.32546	0.438901	0.775639	0.232096	0.11034	0.0578885	3.21126	3.1466	3.23274	3.6934	3.70703	3.2465	3.55697	3.32784	4.0225	3.88714	3.80696	3.52328	3.06126	3.05359	3.64942	3.27718	3.27918	3.40727
l(3)03670	FBgn0010808	4.91e-06	9.13232e-05	5.30892	0.438674	3.5e-07	7.67176e-06	6.45593	0.564134	7.57579	7.41585	7.47145	6.75378	6.87729	6.81914	7.82509	8.05288	7.90114	7.35981	7.26606	7.26551	8.07736	8.03109	8.04704	7.2953	7.22893	7.24881
CG11634	FBgn0032968	0.316574	0.237684	0.499525	0.438406	0.0683843	0.0347127	1.16504	0.839921	0.410285	0.282411	0.205393	0.0585774	0.0599504	0.098028	0.0819011	1.25408	0.877323	0.827415	0.551386	0.0967838	1.04384	2.22203	0.151974	0.111656	0.0997151	0.126495
PKD	FBgn0038603	0.000267448	0.00158163	3.57276	0.438018	0.00180747	0.00273735	2.74293	0.343184	4.82379	4.86418	4.78923	4.63021	4.5863	4.55202	5.43861	5.16133	5.19132	5.33012	5.23873	5.06057	5.16978	5.06946	5.26752	5.26218	5.09593	5.05516
CG8006	FBgn0035857	0.414678	0.274549	0.382289	0.437656	0.0375766	0.023329	1.42508	1.21062	0.495447	0.179082	0.212905	0.0775379	0.0799262	0.236806	0.0439172	1.04384	1.11264	0.971549	0.905454	0.484909	1.33974	2.97377	0.205775	0.544279	0.403341	0.623669
CG14141	FBgn0036146	0.00227618	0.00760789	2.64279	0.437652	0.283719	0.1045	0.547112	0.1273	3.92883	3.89813	3.71686	3.39111	3.39215	3.22999	4.22606	4.43304	4.19768	4.48786	4.13411	4.16653	4.14333	3.8351	3.94729	4.16711	4.04241	3.92307
RFeSP	FBgn0021906	0.000291883	0.00167935	3.53479	0.437064	7.74e-05	0.000278158	4.11126	0.508552	10.152	10.1888	10.1336	9.27936	9.39671	9.32985	10.5095	10.7188	10.5573	10.4601	10.3131	10.1005	10.7378	10.6585	10.6038	10.5889	10.4601	10.3498
CG13367	FBgn0025634	0.00155917	0.00573801	2.80711	0.436939	0.0824063	0.0396333	1.08404	-0.20356	3.50978	3.56292	3.62521	3.82331	4.0545	3.87606	4.17252	3.74497	4.09123	4.14164	4.00988	4.14079	3.41737	3.17577	3.49408	3.64293	3.58325	3.62197
CG11251	FBgn0036346	0.395879	0.267672	0.402438	0.436836	0.0431114	0.0256244	1.36541	1.12187	0.537902	0.224141	0.0892254	0.209575	0.0449523	0.0391973	0.0592635	0.893964	1.20855	1.03623	0.546643	0.147913	1.30313	2.7192	0.19454	0.0876257	0.0397272	0.0378881
Acyp2	FBgn0038363	9.95e-08	8.16099e-06	7.00218	0.436604	2.36e-08	1.07565e-06	7.62709	0.496759	5.15479	5.21302	5.19639	5.32091	5.39165	5.32638	5.63804	5.69235	5.54362	5.25465	5.28651	5.30376	5.70292	5.70853	5.64302	5.47731	5.4174	5.35869
CG18109	FBgn0028901	0.332564	0.244278	0.478125	0.43659	0.0372887	0.0232225	1.42842	1.01242	0.133371	0.171011	0.189737	0.030307	0.0421646	0.0367529	0.0104014	0.913433	0.880056	0.758754	0.597634	0.0989296	1.18517	2.31346	0.0327463	0.0509611	0.0742411	0.109621
CG11191	FBgn0033249	0.00116107	0.00465887	2.93514	0.436504	0.00210528	0.00303472	2.67669	0.402262	3.92389	3.86204	3.66212	3.27389	3.43457	3.19026	4.37074	4.29528	4.09155	3.94923	3.89813	3.77113	4.23499	4.07576	4.34409	3.90919	3.85434	3.68187
CG10340	FBgn0022344	7.64e-05	0.000629911	4.11691	0.436354	0.00110045	0.00192089	2.95843	-0.317138	6.08866	6.09249	6.10045	5.64906	5.84299	5.62445	6.46693	6.6032	6.52053	5.96948	5.93309	5.81553	5.69096	5.88988	5.74934	5.40254	5.16805	5.27427
CG15578	FBgn0040905	0.27015	0.2185	0.568395	0.436268	0.0732926	0.0364922	1.13494	0.740648	0.583208	0.498377	0.178402	0.427598	0.350453	0.245837	0.513651	0.544279	1.51086	1.00919	0.661407	0.514824	0.960534	2.15621	0.365191	0.159224	0.13195	0.314856
CG3566	FBgn0029854	0.000556344	0.00274478	3.25466	0.436079	0.000352573	0.000871997	3.45275	0.46117	4.30897	4.3382	4.12903	4.2367	4.14018	4.3126	4.81173	4.53393	4.73877	4.53393	4.62365	4.72285	4.71298	4.63482	4.8119	5.00108	4.77889	5.05265
Men-b	FBgn0029155	0.0185171	0.0353559	1.73243	0.436075	0.00380918	0.00456312	2.41917	0.572777	7.05588	6.92685	6.89411	5.38372	5.12546	5.24598	7.33063	7.44637	7.40807	6.77162	6.74921	6.95718	7.53758	7.49244	7.56516	6.34154	7.06818	7.11841
CG11052	FBgn0040524	0.000780758	0.00347211	3.10748	0.435864	0.000219471	0.000617233	3.65862	0.508972	3.8655	3.74021	3.84065	2.77485	3.00496	2.78234	4.42571	4.1749	4.15334	3.37694	3.44188	3.44	4.29153	4.19388	4.48786	3.61209	3.52853	3.35087
CG13946	FBgn0040725	0.410038	0.272712	0.387176	0.43577	0.0101413	0.00916877	1.99391	1.5555	1.56721	0.580379	0.812925	4.67435	4.71591	4.97047	0.836729	2.05277	1.37832	0.763637	0.541114	1.43495	1.99474	3.83867	1.79361	0.860522	1.55385	1.68267
CG9205	FBgn0035181	6.55e-05	0.000570013	4.18376	0.435357	0.000242744	0.000664268	3.61485	0.375462	4.90979	4.98426	5.15103	4.94274	5.03275	5.04883	5.52935	5.41692	5.40487	5.34034	5.18098	5.2443	5.33266	5.34379	5.495	5.32867	5.16179	5.34092
CG13220	FBgn0033608	5.59e-05	0.000503085	4.25259	0.43521	2.81e-06	2.8411e-05	5.55129	0.590093	6.44452	6.27539	6.33929	5.76242	5.65042	5.67596	6.68979	6.83842	6.83663	6.66185	6.53686	6.59652	6.9367	6.90741	6.98538	6.79071	6.49888	6.57735
CG5171	FBgn0031907	0.000460594	0.00237966	3.33668	0.434751	4.07e-06	3.63596e-05	5.39041	0.724294	6.14912	6.22155	6.23791	6.0501	6.22006	6.05067	6.87673	6.60272	6.43339	6.59239	6.75378	6.64753	7.00142	6.84485	6.9352	7.28805	7.28503	7.26551
Pdp1	FBgn0016694	4.26e-06	8.38364e-05	5.37059	0.433307	0.00662408	0.0067401	2.17887	0.17964	5.58275	5.61333	5.46335	5.46537	5.33662	5.272	5.99527	6.00401	5.96006	5.98455	6.0333	5.89829	5.74718	5.65677	5.79439	5.85172	5.79736	5.85138
CG5703	FBgn0030853	0.000121795	0.000887337	3.91437	0.433039	5.01e-05	0.000201765	4.30016	0.47745	8.7008	8.77626	8.79679	8.666	8.76462	8.62149	9.16431	9.31537	9.09329	9.44889	9.39671	9.2062	9.28425	9.14259	9.27936	9.67038	9.58379	9.46322
Cyp6t1	FBgn0031182	0.0363713	0.0580923	1.43924	0.432802	0.188184	0.0746762	0.725417	-0.25643	3.96683	3.92859	4.14564	2.42265	1.86374	2.0732	4.765	4.32386	4.25061	3.80105	3.8496	3.9973	3.92995	3.35691	3.98491	3.98807	4.01946	4.07515
swaPsi	FBgn0016974	0.135969	0.143339	0.86656	0.432783	0.00228304	0.00320567	2.64149	1.04428	0.378165	0.544724	0.364048	0.99342	0.89926	0.793721	0.45397	1.0893	1.04202	0.951169	0.869378	0.806726	1.12333	2.27581	1.02064	1.32681	1.02334	1.21716
CG5791	FBgn0040582	0.0146051	0.0297168	1.8355	0.432704	0.017722	0.0136811	1.75149	-0.41687	8.15072	8.20653	8.53219	9.74754	9.54513	9.75014	8.86497	8.4718	8.85079	8.90811	9.16661	9.11281	7.79999	7.70966	8.12918	8.70433	8.39176	8.71744
CG6893	FBgn0036807	0.319952	0.238937	0.494915	0.432303	0.0820721	0.0395343	1.0858	0.790654	0.196471	0.373902	0.363538	0.115664	0.0547801	0.26091	0.074469	0.929738	1.22661	0.766092	0.393775	0.242322	1.09576	2.15016	0.0599504	0.0518714	0.324834	0.195298
CG15580	FBgn0037398	0.276896	0.221351	0.557683	0.43208	0.0376193	0.0233362	1.42459	0.886311	0.159115	0.112841	0.0799262	0.0246756	0.0245443	0.0452078	0.12708	0.802767	0.718275	0.609355	0.53367	0.0678168	0.897795	2.08688	0.0261405	0.136132	0.160461	0.081239
CG17572	FBgn0032753	0.0563376	0.0785193	1.2492	0.431536	0.317259	0.114546	0.498586	-0.213232	1.79163	1.73639	1.61369	1.55138	1.29039	1.41523	2.3426	1.94246	2.15126	2.3352	2.37107	2.39767	1.23038	1.14115	2.13049	1.98779	1.94944	2.13772
ACXC	FBgn0040508	0.392073	0.266602	0.406633	0.431443	0.0533883	0.0295548	1.27255	1.04096	0.207247	0.340668	0.20807	0.14085	0.0981126	0.105054	0.106548	0.907197	1.03657	0.790145	0.609355	0.15765	1.12686	2.69428	0.057709	0.18577	0.221277	0.189827
CG6125	FBgn0038337	0.000755736	0.00340128	3.12163	0.43113	1.79e-06	2.0979e-05	5.74715	0.827625	4.42182	4.5742	4.68168	3.97718	4.13704	4.06764	5.15778	4.81286	5.00045	5.17327	5.10008	5.00274	5.24538	5.39716	5.51803	5.35409	5.31188	5.43861
CG17856	FBgn0039576	0.545736	0.323948	0.263017	0.431048	0.0582605	0.031352	1.23463	1.45106	0.744372	0.834789	0.44415	0.166091	0.177757	0.434731	0.289744	1.98523	1.04148	1.58416	1.14179	0.399015	2.52138	3.65368	0.201428	0.147288	0.12275	0.634773
CG5028	FBgn0039358	4.05e-05	0.000398518	4.39254	0.431017	4.16e-07	8.25783e-06	6.38091	0.676657	8.31049	8.26067	8.22022	7.44637	7.50477	7.50233	8.58503	8.80444	8.69496	8.42711	8.41435	8.26549	9.00909	8.90613	8.90613	8.46949	8.33272	8.22022
CG15708	FBgn0034099	0.447149	0.28659	0.349548	0.430463	0.0467141	0.02706	1.33055	1.21411	0.235739	0.324782	0.504653	0.069415	0.0708255	0.114398	0.098291	0.947064	1.31121	1.05916	0.689131	0.289075	1.63015	3.00041	0.0769493	0.137284	0.173644	0.277724
CG15628	FBgn0031632	0.00265986	0.00849518	2.57514	0.429732	0.149237	0.0623926	0.826123	0.175552	7.64169	7.50914	7.45402	7.5993	7.64761	7.61648	8.03691	8.03109	7.82605	7.76188	7.95176	7.65628	7.62425	7.71706	7.7902	7.78761	7.68184	7.30931
CG13082	FBgn0032803	0.00614074	0.0157943	2.21178	0.429727	0.188073	0.0746583	0.725674	-0.180809	3.55513	3.53971	3.59266	2.9116	2.55365	2.7969	3.95527	3.86847	4.15294	3.21318	3.2495	3.02098	3.26062	3.276	3.60845	3.16427	2.76104	2.90094
Vha36-2	FBgn0033706	0.448741	0.287144	0.348004	0.429446	0.0651563	0.0337378	1.18604	1.11309	0.563553	0.387966	0.457878	0.275563	0.241685	0.0822402	0.167836	1.19887	1.33103	1.19282	0.930909	0.281936	1.37832	3.10722	0.263109	0.0939591	0.239178	0.271201
CG6999	FBgn0030085	0.000134459	0.000947578	3.87141	0.429296	1.41e-05	8.26268e-05	4.85078	0.546539	3.45285	3.35651	3.19356	3.46469	3.18717	3.29964	3.80189	3.80901	3.67991	3.78896	3.80419	3.82118	3.89863	3.88829	3.85562	4.07712	3.86977	4.03409
CG6656	FBgn0038912	0.000163697	0.00109505	3.78596	0.42927	0.078116	0.0381448	1.10726	0.153502	5.35818	5.31689	5.272	5.84186	5.96948	5.87842	5.8789	5.71095	5.64503	5.96024	5.91634	5.8238	5.47855	5.32905	5.59998	5.92473	5.79037	5.69631
CG34210	FBgn0085239	0.516672	0.312667	0.286785	0.429208	0.134983	0.0577451	0.869721	1.02951	1.03439	1.05267	0.406807	0.282995	0.303794	0.107517	0.252596	1.87823	1.65067	1.44612	1.40012	0.443587	2.12739	3.27815	0.176875	0.129121	0.211687	0.361454
Pif2	FBgn0046873	0.532207	0.318509	0.273919	0.42913	0.0474147	0.0273554	1.32409	1.47347	0.983697	0.401515	0.165742	0.247299	0.179873	0.178939	0.107244	1.52426	1.20684	1.21882	0.619937	0.260858	2.38832	3.49919	0.0838462	0.224141	0.234907	0.358801
CG31126	FBgn0051126	9.25e-07	3.06793e-05	6.03386	0.429043	2.38e-07	5.67166e-06	6.62342	0.486863	5.25057	5.19041	5.1557	4.8869	4.87853	4.7988	5.63421	5.5965	5.65309	5.28694	5.35725	5.14667	5.71525	5.64503	5.69699	5.60043	5.55946	5.52404
SdhC	FBgn0037873	4.79e-05	0.000445457	4.31966	0.428803	1.19e-05	7.30128e-05	4.92445	0.495848	9.67038	9.62351	9.66182	8.49297	8.65635	8.53219	9.96596	10.2063	10.0699	9.74007	9.69877	9.65893	10.1964	10.0874	10.1594	9.98552	9.8538	9.73011
Mur18B	FBgn0030999	0.0474849	0.069846	1.32344	0.428662	0.930344	0.266502	0.0313564	-0.0173331	8.50978	9.03324	9.16431	8.22022	7.95625	8.45772	9.16661	9.62051	9.2062	10.2886	10.236	10.1888	8.84513	9.00354	8.80666	9.16661	9.50396	9.72811
CG13827	FBgn0039068	0.0400683	0.0620432	1.3972	0.428598	0.821364	0.242319	0.0854643	0.0429743	2.84452	3.0925	2.95705	3.34392	3.02702	3.14626	3.69833	3.40089	3.08064	3.33938	3.68417	3.53441	2.95052	2.68741	3.38507	3.4322	3.37024	3.64979
CG33490	FBgn0053490	0.293072	0.227682	0.533026	0.428431	0.0368768	0.0230394	1.43325	0.914649	0.0363213	0.115193	0.25398	0.0770571	0.123377	0.0920625	0.0435024	0.830354	0.816931	0.612918	0.516953	0.0318044	1.04717	2.06446	0.0378185	0.22711	0.0631195	0.390191
CG3699	FBgn0040349	0.00673779	0.0169667	2.17148	0.427986	0.728397	0.221374	0.137632	0.0465663	7.11041	7.44637	7.28698	6.4754	6.54546	6.43779	7.85519	7.49244	7.78009	8.20653	7.83568	8.03691	7.32301	7.26606	7.39439	7.8628	8.22022	8.26067
CG31706	FBgn0051706	6.63e-05	0.000575918	4.17849	0.42798	0.00126422	0.00213411	2.89818	0.300634	4.21925	4.33138	4.20526	4.73385	4.83022	4.7469	4.60302	4.72108	4.71573	5.04183	4.97427	5.08058	4.57187	4.37002	4.71591	4.91231	4.8534	4.92262
Vha68-1	FBgn0020368	3.08e-06	6.89057e-05	5.51145	0.427799	5.67e-07	1.01209e-05	6.24642	0.502568	6.94852	6.86235	6.85358	6.55146	6.43688	6.48777	7.29009	7.37272	7.28503	6.81679	6.69515	6.64373	7.3882	7.3614	7.42254	6.69189	6.56488	6.52717
Cyp12e1	FBgn0037817	0.00136907	0.0052281	2.86357	0.42771	0.0303161	0.0200439	1.51833	0.253584	4.2123	4.18972	4.17867	4.21095	4.11434	4.25061	4.59821	4.62227	4.64334	4.53857	4.64674	4.73475	4.51337	4.14856	4.6795	4.65706	4.55642	4.72108
Cpr47Ea	FBgn0033597	0.0914087	0.10959	1.03901	0.426956	5.09e-05	0.000203559	4.29328	1.42661	1.03657	1.31598	1.57924	0.494675	0.654051	0.774746	2.37382	1.48047	1.35837	0.478834	0.930176	0.693388	2.82679	2.60293	2.7819	0.766494	1.04148	0.992735
CG32039	FBgn0052039	4.29e-07	1.84971e-05	6.36754	0.426954	5.71e-07	1.01209e-05	6.24336	0.415739	4.54831	4.67065	4.72813	4.71017	4.74091	4.75017	5.0398	5.13993	5.04822	5.05333	5.04872	4.96183	5.02713	5.06197	5.10521	5.13381	5.08071	5.1261
Cyp6d4	FBgn0039006	0.0465834	0.0690648	1.33177	0.426852	0.204012	0.0797775	0.690344	0.258495	3.90013	3.59753	3.76997	3.90292	3.72702	3.89863	3.80758	4.42152	4.31909	4.03639	4.06547	4.46156	4.12453	3.62521	4.29338	4.14825	4.29338	4.39027
CG43165	FBgn0262721	0.130299	0.139281	0.885059	0.426331	0.197662	0.0776858	0.704077	0.357991	1.40466	1.46911	1.6777	2.62814	2.556	2.47115	2.53542	1.26416	2.03088	1.81395	2.15674	2.21432	1.82105	1.54758	2.25682	2.20563	2.2828	2.39456
XRCC1	FBgn0026751	0.00105953	0.00436792	2.97489	0.426206	0.327249	0.117371	0.485122	0.101585	3.09482	3.18029	3.18494	4.15773	4.1419	4.12559	3.72574	3.53971	3.47322	4.04905	4.08734	4.10054	3.21019	3.037	3.51761	4.08056	3.99568	3.89003
Cog7	FBgn0051040	0.00951787	0.0217866	2.02146	0.42615	0.0106202	0.00946466	1.97387	0.417993	3.95527	3.63226	3.76748	4.04031	3.57385	3.76733	4.13666	4.26108	4.23571	4.43119	4.33036	4.40665	4.33897	3.91289	4.35712	4.3326	4.21899	4.50435
CG32278	FBgn0052278	6.35e-05	0.000554644	4.19723	0.426073	3.83e-05	0.000165626	4.4168	0.449866	5.22061	5.17981	5.33752	5.45458	5.61741	5.40886	5.64906	5.71803	5.64906	6.05238	6.0798	6.10653	5.76727	5.53568	5.78459	6.38379	6.26809	6.25064
CG12693	FBgn0029705	0.428339	0.279405	0.368212	0.42606	0.06239	0.0327751	1.20489	1.06774	0.468901	0.353493	0.248922	0.354919	0.305953	0.177744	0.0529431	1.03239	1.26416	0.972438	0.774371	0.333967	1.33086	2.84303	0.100634	0.222417	0.110792	0.210187
CR43870	FBgn0264462	0.0177766	0.0343289	1.75015	0.425828	0.207788	0.0810333	0.68238	-0.206567	3.21108	2.96245	3.26111	3.47089	3.57548	3.38915	3.58965	3.61449	3.50799	3.54028	3.94717	3.45197	3.2055	2.56897	3.04047	3.51349	3.48575	3.47886
CG11200	FBgn0034500	0.00241482	0.00798129	2.61712	0.425674	0.480939	0.159947	0.31791	-0.0809366	5.43986	5.44579	5.46229	4.54846	4.78084	4.70872	5.99717	5.69631	5.93148	5.70292	5.79037	5.3496	5.33737	5.25394	5.51383	5.36929	5.3844	5.37786
mRpS6	FBgn0035534	0.000325076	0.0018311	3.48802	0.425406	0.00815754	0.00781053	2.08844	0.270817	3.91627	3.72243	3.83596	3.98781	4.00723	4.08949	4.29099	4.13614	4.32374	4.24617	4.07695	4.15878	4.251	3.90834	4.12776	4.22567	4.3704	4.24422
mRpS28	FBgn0034361	0.00262937	0.00843757	2.58015	0.425168	0.038633	0.0237643	1.41304	0.261248	3.88775	3.73497	4.07712	3.98905	3.79299	3.95341	4.27083	4.31383	4.39069	4.18972	4.08037	4.3126	4.31909	3.92925	4.23524	4.33876	4.09923	4.21254
CG2781	FBgn0037534	0.0089257	0.020731	2.04936	0.424811	0.242934	0.0919789	0.614512	0.167452	6.05433	6.30014	6.10267	5.9343	6.29294	6.26052	6.57475	6.64293	6.51389	6.63349	6.54721	6.14247	6.31922	6.43359	6.20668	6.52053	6.41494	6.20822
CG34189	FBgn0085218	0.0915116	0.109686	1.03852	0.424672	0.00152629	0.00244685	2.81636	0.944569	1.57643	1.79606	1.59015	1.88435	1.46259	1.87487	1.89604	2.15016	2.19046	1.84251	1.9486	1.98403	2.2935	3.09966	2.40319	2.24192	1.3981	1.98618
Pp1-13C	FBgn0003132	0.431997	0.280941	0.364519	0.423486	0.0558805	0.0304299	1.25274	1.10234	0.514632	0.103797	0.27477	0.0687668	0.0310224	0.51673	0.039402	0.9701	1.15416	0.888874	0.71352	0.334513	1.23421	2.84695	0.119058	0.0644094	0.145898	0.236071
CG9722	FBgn0038209	0.325343	0.241102	0.487659	0.423013	0.046008	0.0267969	1.33717	0.917848	0.359471	0.380977	0.151557	0.0690148	0.24774	0.114165	0.0979436	1.03722	1.02588	0.845261	0.52173	0.20721	1.41293	2.15578	0.0768341	0.20831	0.222524	0.101272
CG31191	FBgn0051191	0.324596	0.240775	0.488657	0.422162	0.528662	0.172306	0.276822	-0.266668	1.14143	1.31021	1.36784	1.33859	1.11639	1.14115	2.88944	1.02625	1.17027	1.27271	1.59206	1.65946	0.689449	0.650654	1.67937	1.57143	1.88956	1.89472
CG9410	FBgn0033086	1.41e-05	0.000185762	4.85078	0.422042	1.14e-05	7.14722e-05	4.9431	0.431137	4.93582	4.86179	4.76236	4.24701	4.1828	4.22121	5.3116	5.30376	5.21075	4.85894	4.89704	4.72555	5.20826	5.38887	5.25626	4.83982	4.77174	4.71416
Pka-C2	FBgn0000274	0.392612	0.266725	0.406036	0.42186	0.0452223	0.0264714	1.34465	1.06309	0.546643	0.0479109	0.219227	0.215489	0.233681	0.157304	0.0612151	1.12494	0.893208	0.8309	0.529608	0.243505	1.12761	2.67567	0.199777	0.243251	0.0806153	0.201363
CG41562	FBgn0085693	0.291055	0.226897	0.536025	0.421786	0.069113	0.0349328	1.16044	0.762352	0.105054	0.545921	0.232938	0.319676	0.244259	0.833193	0.383752	1.01055	0.75497	0.803272	0.345364	0.159181	1.04202	2.01264	0.11631	0.205283	0.297604	0.630766
CG32939	FBgn0052939	0.000606369	0.00291756	3.21726	0.421621	0.00520143	0.00567891	2.28388	0.311986	3.37049	3.27015	3.51822	3.34043	3.32401	3.25547	3.84733	3.77341	3.80298	3.56765	3.63559	3.51349	3.82296	3.44692	3.82493	3.50301	3.64268	3.6106
CG32832	FBgn0052832	0.528731	0.317229	0.276765	0.421005	0.0475173	0.0273981	1.32315	1.43241	1.09396	1.14143	0.996106	0.55155	0.394427	0.494729	0.557899	2.11557	1.82105	2.10786	1.33583	1.33974	2.874	3.9973	0.657428	0.877323	0.92589	0.753979
CG6048	FBgn0029827	0.185216	0.175204	0.732321	0.420995	0.258878	0.0968093	0.586905	0.354995	2.58887	2.72512	2.69637	2.80947	2.31133	2.53432	2.63684	3.44139	3.19512	3.40302	3.47545	3.48696	3.20172	2.51557	3.35806	2.92091	4.13206	3.56248
CG10899	FBgn0039235	0.424472	0.278195	0.372151	0.420678	0.0372197	0.023188	1.42923	1.19181	0.563553	0.497416	0.363364	0.379647	0.312482	0.407004	0.262887	1.18094	1.24254	1.1537	0.986898	0.494702	1.58548	3.08028	0.333997	0.314821	0.494373	0.39279
l(3)neo18	FBgn0011455	0.000130677	0.000930908	3.8838	0.420483	1.66e-05	9.38301e-05	4.77989	0.524591	8.76462	8.68326	8.68163	8.12114	8.27987	8.16183	9.03324	9.24491	9.11281	8.80444	8.94028	8.73843	9.32985	9.17432	9.19912	9.11696	9.08224	8.89648
rha	FBgn0027376	0.369951	0.258071	0.431856	0.42048	0.026194	0.018063	1.5818	1.14414	0.609355	0.579189	0.525296	0.583208	0.62246	0.764343	0.479969	1.24769	1.24762	1.1264	0.725233	0.44456	1.79475	2.8979	0.4536	0.501961	0.538031	0.696186
CG1835	FBgn0031127	0.415122	0.274659	0.381824	0.420451	0.0310157	0.0203844	1.50842	1.21662	1.26793	0.825015	0.348465	1.17998	0.966235	0.774746	0.7483	1.48047	1.47399	1.82578	1.00304	0.693388	1.83445	3.32487	0.931938	1.03729	1.0715	1.03349
CG40006	FBgn0058006	0.00694285	0.017331	2.15846	0.420171	0.0771602	0.037823	1.11261	0.249841	5.17593	5.34233	5.14556	4.41639	4.5164	4.46976	5.34379	5.80174	5.7788	5.33762	5.46335	5.0615	5.53509	5.31188	5.56638	5.56945	5.42544	5.39759
CG12203	FBgn0031021	0.000805474	0.00355396	3.09395	0.419907	3.04e-05	0.000140566	4.51713	0.612285	7.85819	7.83128	7.86957	6.9626	7.12331	7.03068	8.08794	8.38722	8.34361	7.96146	7.75634	7.60211	8.50207	8.39176	8.50207	7.98036	7.91488	7.77614
CG3394	FBgn0034999	0.0114369	0.0247236	1.94169	0.419904	8.92e-05	0.000311595	4.04964	0.811991	3.67388	3.80644	3.72702	3.23202	3.43009	3.40872	3.85643	4.29696	4.31367	4.07857	3.82819	3.96213	4.50435	4.46059	4.67837	4.11208	4.60725	4.24159
Erk7	FBgn0052703	0.349228	0.250391	0.456891	0.419758	0.0345004	0.0220519	1.46218	1.02736	0.362326	0.348465	0.229258	0.243505	0.362863	0.436149	0.211687	0.964663	1.02297	0.955324	0.609911	0.20329	1.21996	2.53991	0.262276	0.202576	0.183085	0.269694
CG34411	FBgn0085440	0.0572363	0.0792363	1.24233	0.419631	0.803087	0.238239	0.0952374	0.0508697	1.64848	1.73749	1.55766	1.61076	1.71548	1.65067	2.21984	1.95269	2.02999	1.94246	1.81395	1.93723	1.65797	1.1529	2.28537	2.00854	2.06545	2.07893
HmgZ	FBgn0010228	0.000196345	0.00125504	3.70698	0.419436	0.064128	0.0333877	1.19295	0.162126	7.5993	7.37777	7.3881	7.60985	7.4908	7.47393	7.78009	7.91929	7.9241	7.55974	7.49244	7.55776	7.60211	7.48755	7.76188	7.48619	7.31633	7.46697
CG30373	FBgn0050373	0.000259321	0.00154319	3.58616	0.419084	0.000148947	0.000461869	3.82697	0.4469	6.20462	6.17912	6.24647	5.77438	5.67615	5.68277	6.79584	6.65782	6.4338	6.81126	6.78721	6.7153	6.7153	6.52053	6.73509	7.03339	6.94852	6.8719
CG9106	FBgn0030624	0.446299	0.286432	0.350374	0.418658	0.0437443	0.0258942	1.35908	1.19796	0.364931	0.299549	0.233681	0.047809	0.10902	0.0415393	0.0649625	0.915784	1.17339	0.837958	0.596762	0.313997	1.47772	2.96226	0.0520407	0.0950295	0.0839743	0.304652
CG11291	FBgn0034713	0.483101	0.299763	0.315962	0.418076	0.0706161	0.0355112	1.1511	1.14605	1.00478	0.413431	0.600268	0.290729	0.358991	0.321995	0.322436	1.4985	1.45177	1.09201	0.933406	0.503931	1.65393	3.40491	0.397794	0.100539	0.218145	0.679445
CG14546	FBgn0039395	0.326618	0.241519	0.48596	0.41795	0.0543264	0.0299064	1.26499	0.871423	0.545142	0.0977425	0.272691	0.0452363	0.102237	0.227728	0.15765	0.983031	1.02874	0.725117	0.679445	0.332251	1.29043	2.1893	0.0501155	0.0892792	0.120361	0.200038
CG32117	FBgn0052117	0.338736	0.246703	0.470139	0.417881	0.0602444	0.0320644	1.22008	0.869901	0.502841	0.292932	0.280984	0.387966	0.20427	0.198707	0.12746	0.939931	1.26301	0.780899	0.556175	0.44976	1.32966	2.26132	0.0954789	0.168589	0.251774	0.116369
CG10479	FBgn0035656	0.0957977	0.112911	1.01864	0.417858	0.0992462	0.0454874	1.00329	-0.413055	3.94164	4.10132	3.99842	4.06829	3.91101	4.05981	5.1153	4.00988	4.16978	4.16653	4.10364	3.93464	3.86401	3.29117	3.64703	3.79991	3.80901	3.99138
CG7408	FBgn0036765	0.0183802	0.0351656	1.73565	0.417787	0.0688831	0.0348544	1.16189	0.306158	3.58478	3.48787	3.61539	3.27668	3.36164	3.3081	3.69106	4.01142	4.23892	3.82213	3.76171	3.92859	3.93711	3.56658	4.10282	4.0605	3.8351	4.26735
CG31100	FBgn0051100	0.00351301	0.0104857	2.45432	0.41772	0.242233	0.0917982	0.615767	0.141934	3.78583	3.54641	3.66817	4.48949	4.5232	4.62187	4.2367	3.93671	4.08016	4.30239	4.30609	4.17265	3.72481	3.62953	4.07187	4.19582	3.94122	4.14723
CG43348	FBgn0263080	0.591037	0.339248	0.228385	0.417595	0.965729	0.273447	0.0151447	-0.033185	5.15191	3.91053	4.50788	4.65475	3.26933	4.57095	2.9008	6.15676	5.76554	5.90681	5.91338	6.71723	4.36262	4.20509	4.90305	4.59841	6.17502	5.67615
CG5509	FBgn0038054	0.17359	0.16816	0.760475	0.417325	0.0224946	0.0162372	1.64792	0.755012	0.627387	0.770405	0.623225	0.983179	0.78837	0.839736	0.876993	1.27394	1.12206	0.893208	0.857416	0.786669	1.66877	2.10179	0.515497	0.732983	0.520848	0.75027
Obp19b	FBgn0031110	0.00676393	0.0170076	2.1698	0.416944	0.000189239	0.000552222	3.72299	0.676415	7.54094	7.3384	7.21942	6.76309	6.9103	6.68304	7.59119	7.75275	8.00566	8.01191	8.02929	7.76188	8.01191	7.91488	8.20123	8.20523	7.9241	8.05288
Dot	FBgn0015663	0.00657238	0.0166784	2.18228	0.416816	0.749187	0.226113	0.12541	-0.0415661	2.90395	2.91333	2.93289	3.13432	3.12143	3.12552	3.41262	3.26503	3.32297	3.19003	3.1268	3.39787	2.82029	2.59641	3.20877	3.09662	3.02438	3.31781
IP3K2	FBgn0085388	0.0252745	0.0447289	1.59732	0.416669	0.176885	0.071288	0.752309	0.234073	4.19931	4.61888	4.23195	4.27281	4.59672	4.30239	5.11565	4.59021	4.59428	4.97047	4.87811	4.53953	4.62332	4.48485	4.64418	4.70456	4.78985	4.69619
CG43760	FBgn0264260	0.490566	0.302402	0.309303	0.416599	0.133261	0.0571374	0.875297	0.943413	1.22145	0.504653	0.479676	0.180545	0.196904	0.24774	0.31634	1.8448	1.29445	0.912673	0.544724	0.328967	1.62657	3.1946	0.214848	0.301303	0.246057	0.319395
fabp	FBgn0037913	0.00176908	0.00632767	2.75225	0.416561	0.400692	0.138073	0.397189	0.090789	3.89508	3.76324	3.92925	3.19433	3.10552	3.16164	4.46976	4.04363	4.32386	3.95768	3.76997	4.09315	3.94627	3.86255	4.05112	4.26431	4.33535	4.18247
CG9509	FBgn0030594	0.0871905	0.10621	1.05953	0.416538	0.00218644	0.00311574	2.66026	0.867834	4.5519	4.98697	5.2257	3.16076	3.12379	3.49878	4.89959	5.3967	5.7179	5.4871	5.56998	5.59938	5.67699	5.81422	5.87685	5.29289	5.79498	5.90681
CG6045	FBgn0038349	0.000357151	0.00194809	3.44715	0.416399	0.26	0.0971466	0.585027	0.100173	6.06067	6.04222	6.05548	6.08553	6.07748	6.10232	6.37609	6.47395	6.55752	6.73836	6.63955	6.77467	6.03636	6.06137	6.36116	6.37609	6.51932	6.64843
CG9953	FBgn0035726	0.000209021	0.00131306	3.67981	0.415915	0.587208	0.187139	0.231208	0.0443084	5.78863	5.97299	6.06006	7.00142	7.02794	7.00976	6.51022	6.25686	6.30236	6.65395	6.52484	6.56488	6.07393	5.87241	6.00827	6.42769	6.39389	6.51932
CG11815	FBgn0035299	0.29644	0.229018	0.528063	0.415833	0.0355703	0.0225009	1.44891	0.901827	0.219232	0.146631	0.138097	0.143449	0.0651937	0.336686	0.089773	0.918637	0.743049	0.761427	0.580388	0.104167	1.10122	2.0371	0.0711172	0.126522	0.108363	0.302252
CG13385	FBgn0032039	0.477333	0.297782	0.321179	0.415366	0.079798	0.0387575	1.09801	1.08371	0.861593	0.263109	0.190938	0.0522279	0.121864	0.0466413	0.0730568	1.27239	1.21629	1.12729	0.821853	0.275662	1.55046	2.95705	0.0592635	0.169705	0.0469041	0.156419
yellow-e	FBgn0041711	0.0282644	0.0485527	1.54876	0.415173	0.000169914	0.000511958	3.76977	0.893089	5.27661	5.2195	4.61248	4.96519	4.89932	5.11086	5.42611	5.54469	5.38331	5.3299	5.22267	4.96519	5.87241	5.86568	6.04977	6.17502	5.75017	5.84998
CG1138	FBgn0037456	0.402547	0.270271	0.395183	0.414895	0.0494395	0.0281336	1.30593	1.04475	0.399747	0.32001	0.0639204	0.0675596	0.16297	0.112579	0.096026	0.739146	1.19319	0.839152	0.553845	0.108583	1.26188	2.58103	0.0750187	0.134765	0.258036	0.365973
CG3386	FBgn0035152	0.0136451	0.0282729	1.86502	0.414751	0.389479	0.135068	0.409516	-0.12826	2.79381	2.52138	2.80622	3.06257	3.20422	2.97862	3.25799	3.05488	3.0528	3.03259	3.07959	3.10939	2.70338	2.1712	2.86205	3.22706	3.18443	3.20187
CG14005	FBgn0031739	0.0105232	0.023399	1.97785	0.414292	0.788858	0.23526	0.103001	-0.0374792	2.97946	3.00918	3.00962	3.43457	3.4875	3.50978	3.50755	3.46892	3.26467	3.91249	3.70676	3.72068	2.91592	2.62597	3.34393	3.50978	3.66523	3.57684
CG1827	FBgn0033431	0.00022391	0.0013782	3.64993	0.414272	0.00246503	0.00337376	2.60818	0.304194	4.19912	4.21669	4.20314	4.35712	4.23571	4.24747	4.65689	4.58039	4.62449	4.47515	4.46659	4.7311	4.47132	4.5062	4.55401	4.50934	4.39982	4.72227
CG13865	FBgn0039965	7.88e-05	0.000642975	4.10347	0.414117	9.04e-05	0.000313878	4.04383	0.407872	4.79302	4.70287	4.7412	4.86236	4.91231	4.74362	5.2443	5.19534	5.0398	4.93831	5.01752	4.95456	5.18376	5.00045	5.2765	5.22759	5.24376	5.14667
CG7203	FBgn0031942	0.116231	0.129228	0.934678	0.414053	0.0024222	0.00333576	2.61579	0.935203	4.62391	4.58373	4.87782	2.67408	3.27568	3.07753	4.52583	5.11651	5.68528	4.13272	4.13272	3.95841	5.8238	5.33662	5.73065	3.59667	3.47089	3.46003
Ance	FBgn0012037	0.0554803	0.0778033	1.25586	0.413827	0.25663	0.0961878	0.590693	0.232449	6.26713	6.42028	6.54721	5.6118	5.32245	5.61741	6.40221	7.13169	6.9422	6.8865	6.8028	7.14094	6.71723	6.43275	6.78199	6.20198	6.62862	6.76309
CG4095	FBgn0029890	0.350015	0.250725	0.455913	0.413558	0.0764226	0.0375821	1.11678	0.824448	0.551918	0.389018	0.474493	0.49439	0.497191	0.38983	0.436463	0.861593	1.35805	0.79647	0.623669	0.324665	1.02764	2.56104	0.30009	0.54172	0.731394	0.497191
CG14294	FBgn0038656	0.316721	0.237684	0.499323	0.413418	0.0145269	0.0118219	1.83783	1.12916	0.343444	0.365872	0.440171	0.338842	0.118334	0.175482	0.408335	1.23686	0.744547	0.627733	0.939131	0.300816	1.72702	2.44182	0.368122	0.219252	0.388413	0.365594
CG2750	FBgn0030376	0.437875	0.283179	0.35865	0.413174	0.0687785	0.0348198	1.16255	1.0292	0.516953	0.372244	0.163455	0.238928	0.216827	0.260034	0.0740411	0.990823	1.22731	0.960054	0.689373	0.287209	1.16795	2.83894	0.133371	0.115838	0.243951	0.201704
CG4729	FBgn0036623	0.00010176	0.000772213	3.99242	0.412836	0.00455152	0.00518009	2.34184	0.252738	5.37786	5.50226	5.6537	5.52505	5.53125	5.57485	5.98859	5.80395	5.97979	5.97365	5.88988	5.82853	5.88526	5.68725	5.71953	5.90129	5.91486	5.93148
CG2209	FBgn0030441	0.32468	0.240799	0.488544	0.412609	0.0581783	0.0313212	1.23524	0.841227	0.361005	0.088376	0.0848638	0.0884234	0.093608	0.140694	0.136966	0.695532	0.939575	0.609135	0.604073	0.248287	0.719952	2.23808	0.0998963	0.0818647	0.210911	0.180179
CG7634	FBgn0037101	0.637242	0.354861	0.195696	0.411976	0.187077	0.0743678	0.72798	1.19147	1.10663	0.609355	1.38867	0.802191	1.47745	0.770405	0.039402	2.14884	2.15235	2.02554	1.22731	0.468688	2.39347	4.16653	0.119058	0.176635	0.261265	0.277228
CG33296	FBgn0053296	0.00104037	0.00432456	2.98281	0.411632	3.29e-06	3.07521e-05	5.4828	-0.776756	3.41492	3.69925	3.53767	3.06784	3.11639	3.10552	4.00355	3.80946	4.07373	3.85511	4.07247	3.8181	2.78848	2.65694	2.87615	3.24928	3.26902	3.07123
CG11703	FBgn0038690	0.267514	0.217183	0.572653	0.411493	0.00243928	0.0033481	2.61274	1.35184	0.106037	0.0501431	0.377404	0.0478722	0.0487919	0.083557	0.0651542	0.837958	0.864951	0.870421	0.563041	0.121425	1.23229	2.49524	0.861593	0.582175	0.752984	0.814309
CG16986	FBgn0035356	0.111342	0.125464	0.953341	0.411289	0.246382	0.0930512	0.608391	0.291639	6.90937	6.68304	6.77467	6.01214	5.82759	5.66376	7.24881	7.14308	7.20905	7.00976	6.96626	7.68774	6.90937	7.03733	7.2953	6.73528	7.39439	7.75394
Mgstl	FBgn0025814	0.00183792	0.00650522	2.73567	0.410969	8.41e-05	0.000297398	4.0752	0.599921	7.44637	7.60251	7.57782	7.21942	7.09307	7.16155	8.0575	7.7902	8.01191	8.13901	7.71364	7.74309	8.18167	8.08794	8.15686	8.43515	8.28322	8.34361
Cyp4ac2	FBgn0031694	0.000334397	0.00186588	3.47574	0.410687	0.0880538	0.04149	1.05525	0.153939	4.86852	4.99728	4.765	4.28377	4.05112	4.16764	5.34269	5.18045	5.33971	4.94177	5.00813	5.07308	5.04924	4.98697	5.05641	5.33435	5.0656	5.116
Rgk3	FBgn0085426	5.29e-05	0.000482495	4.27654	0.410433	0.00541342	0.0058481	2.26653	0.227575	5.33138	5.38526	5.30249	4.61048	4.67837	4.59428	5.75139	5.82308	5.67596	4.74091	4.79661	4.57793	5.61333	5.48472	5.6038	4.78497	4.8025	4.59342
CG9235	FBgn0034560	0.349109	0.250344	0.457039	0.410077	0.0411467	0.0248162	1.38566	0.962565	0.314931	0.278631	0.118207	0.0572372	0.0589776	0.0490832	0.0794488	0.825297	1.03725	0.777257	0.70634	0.0500056	1.32467	2.21175	0.0630419	0.110203	0.0494904	0.165404
CG43321	FBgn0263026	0.492087	0.302946	0.307958	0.409736	0.0234323	0.0167041	1.63019	1.50055	0.563553	0.612918	0.171011	0.415244	0.184881	0.12394	0.29946	1.2914	0.985827	1.1292	1.04469	0.608961	2.27777	3.36528	0.206085	0.152942	0.239178	0.39279
CG8931	FBgn0030717	1.19e-05	0.00016649	4.92445	0.409616	4.72e-05	0.000195572	4.32606	0.355008	5.19041	5.0623	5.07896	4.84934	4.87462	4.93078	5.58369	5.5161	5.46073	5.00475	4.95142	4.87096	5.47003	5.34546	5.58121	5.04183	4.99027	4.99152
CG7966	FBgn0038115	0.000198774	0.00126715	3.70164	0.408582	0.0742111	0.0368463	1.12953	0.151696	5.53479	5.73904	5.59017	5.27387	5.33086	5.35984	6.10914	6.02904	5.95157	6.10699	6.22372	6.01603	5.81768	5.6477	5.85371	6.34081	6.1245	6.20592
CG31313	FBgn0051313	0.00011094	0.000827315	3.95491	0.407997	0.00567443	0.00606165	2.24608	0.243542	8.50584	8.59376	8.55739	8.76556	8.70433	8.76556	9.04563	9.01602	8.81933	9.03986	9.06576	8.90811	8.80444	8.71529	8.86789	9.4362	9.18947	9.35909
CG3215	FBgn0034825	0.361646	0.25494	0.441716	0.407725	0.0646484	0.0335684	1.18944	0.874541	0.243354	0.19454	0.0496513	0.0503125	0.0513981	0.131734	0.0697129	0.921807	0.719202	0.824004	0.628494	0.0458004	0.77512	2.28003	0.0560187	0.0492387	0.0883991	0.114443
CG6290	FBgn0030921	0.00749882	0.0183329	2.12501	0.40769	0.234598	0.0895072	0.629676	0.158972	4.96308	4.65278	4.75888	3.86943	4.07187	3.82296	5.05549	5.15103	5.39129	5.13079	5.03275	5.00865	4.83083	4.78338	5.23745	4.97156	4.81173	4.90079
CG6028	FBgn0038924	0.0206345	0.0383039	1.68541	0.407487	0.21734	0.084062	0.66286	0.199154	6.35653	6.33569	6.35083	5.68094	5.62922	5.62535	6.86691	6.57735	6.82125	6.84181	6.78669	6.96667	6.41727	6.40904	6.81419	6.43779	6.95718	7.10615
kappaTry	FBgn0043471	0.214661	0.190728	0.668247	0.407462	0.509815	0.167264	0.292587	0.211273	5.62939	5.59793	5.91064	4.62932	4.07341	4.73315	5.82281	6.27842	6.25911	5.98859	5.95763	6.84534	5.74934	5.8378	6.18464	5.3496	6.32048	6.39943
CG10237	FBgn0032783	0.00730512	0.0180119	2.13637	0.407177	0.713309	0.217756	0.146722	0.0475225	7.45402	7.43304	7.36465	6.508	6.64156	6.46987	7.91488	7.78391	7.77445	7.97202	8.00566	7.41951	7.46697	7.39439	7.53292	7.56163	7.60211	7.38005
CG5190	FBgn0034351	0.000122527	0.000891301	3.91177	0.407075	0.406719	0.139898	0.390706	0.0628821	4.08392	3.92594	4.0536	3.72574	3.73961	3.71444	4.47159	4.38943	4.42365	4.47246	4.40167	4.34229	4.11016	3.91627	4.22567	4.42339	4.21799	4.31732
CG5377	FBgn0038974	0.000537514	0.00267326	3.26961	0.407035	5.59e-05	0.000217497	4.25259	0.528477	4.59083	4.64912	4.60419	4.74736	4.97117	4.87363	5.17271	5.01891	4.87363	5.56093	5.44579	5.24538	5.10955	5.09404	5.22598	5.73904	5.67699	5.66254
Nep1	FBgn0029843	0.0457004	0.0680963	1.34008	0.40692	0.222362	0.0856437	0.652939	0.234963	2.42155	2.26896	2.535	1.6787	1.98577	1.67717	2.73961	2.8597	2.84695	2.62763	2.38654	2.46747	2.76366	2.12201	3.04472	2.45809	2.61923	2.48453
CG8584	FBgn0033322	0.43081	0.280456	0.365714	0.406735	0.0780213	0.0381221	1.10779	0.961263	0.520848	0.210766	0.423586	0.124428	0.059152	0.145128	0.0798553	0.983302	1.31225	1.05288	0.802767	0.28825	1.34186	2.63387	0.063261	0.0553292	0.0495891	0.125317
CG7407	FBgn0037134	0.000155602	0.00105368	3.80798	0.406502	0.00505284	0.00556962	2.29646	0.256823	3.94331	3.72741	3.70273	3.72654	3.72265	3.74942	4.29504	4.17313	4.12478	4.03929	3.96699	4.10435	3.9865	3.9839	4.17352	3.92904	3.88735	4.06569
CG12035	FBgn0035263	0.430178	0.28018	0.366352	0.406484	0.0382111	0.0235874	1.41781	1.15909	0.367484	0.556175	0.424671	0.551445	0.544724	0.678227	0.307596	1.0657	1.19449	1.2614	0.788769	0.25789	1.56396	2.93919	0.322436	0.335879	0.512354	0.623669
CG6197	FBgn0033859	0.000451205	0.0023388	3.34563	0.40646	0.2972	0.108629	0.526951	0.0927369	3.54005	3.42132	3.49469	4.17147	4.29099	4.28764	4.05981	3.86561	3.75001	4.06781	4.05476	3.99842	3.59507	3.39431	3.74489	3.94331	3.95386	3.9305
CG4553	FBgn0039336	0.0142619	0.0291913	1.84582	0.405285	0.488364	0.161667	0.311256	0.10118	3.03613	3.0023	3.10407	2.97721	2.8548	2.91333	3.46409	3.58325	3.31102	3.24776	3.42405	3.37571	3.19913	2.74813	3.49878	3.47035	3.35055	3.36895
CG32643	FBgn0052643	0.308296	0.234177	0.511032	0.405175	0.0651844	0.0337378	1.18586	0.772887	0.227005	0.100915	0.415335	0.102138	0.107128	0.163391	0.167348	0.952191	0.83924	0.689131	0.823246	0.157128	0.874589	2.07231	0.115016	0.203008	0.238694	0.270763
CG17549	FBgn0032774	0.000192144	0.0012315	3.71637	0.40497	0.0871553	0.0412019	1.05971	0.142658	7.26551	7.28805	7.31241	8.39698	8.68326	8.67048	7.68774	7.69042	7.70272	8.30757	8.32667	8.16183	7.44259	7.34221	7.50914	8.29205	8.10374	8.12114
CG9238	FBgn0036428	0.0421185	0.0643483	1.37553	0.404459	0.0766082	0.0376476	1.11572	0.344538	7.55974	7.45691	7.55536	7.47393	7.23272	7.2016	7.89113	8.09425	7.79999	7.45402	7.4908	7.94888	8.0018	7.86072	7.74309	7.68387	7.29194	8.04964
dnd	FBgn0038916	0.0597566	0.0816058	1.22361	0.404295	0.446654	0.150869	0.350029	-0.153027	2.51747	3.02735	2.67276	2.14305	2.14661	2.00673	3.18974	3.08149	3.15923	2.6688	3.00496	3.03388	2.61338	2.15211	2.99301	2.62463	3.02537	2.71567
Actn3	FBgn0015008	0.440446	0.284415	0.356107	0.403847	0.0611093	0.0323368	1.21389	1.04576	0.303114	0.387167	0.202863	0.0708595	0.0314731	0.0863384	0.0402429	1.13353	0.930909	0.990486	0.594605	0.186647	1.28599	2.7094	0.0350237	0.0656297	0.175531	0.215489
CG11249	FBgn0037115	0.382162	0.262954	0.417752	0.403804	0.0354996	0.0224872	1.44978	1.05424	0.374204	0.185262	0.175581	0.132566	0.0988184	0.151315	0.234878	0.951305	0.760275	0.849872	0.563361	0.2451	1.03722	2.65037	0.210187	0.155858	0.20427	0.171855
Roe1	FBgn0014877	9.25e-05	0.000722758	4.03386	0.403336	4.01e-06	3.60954e-05	5.39686	0.5582	5.05242	5.07114	4.94963	4.87363	4.93212	5.00788	5.43026	5.45536	5.39759	5.38372	5.35296	5.20035	5.60418	5.66376	5.47986	5.54831	5.46011	5.29683
Jheh1	FBgn0010053	0.000435413	0.0022848	3.3611	0.403297	5.5e-06	4.42377e-05	5.25964	0.647817	5.81384	5.91091	5.79736	5.44579	5.37272	5.39844	6.08866	6.25858	6.38477	6.29196	6.32657	6.00741	6.42221	6.5116	6.53176	6.71317	6.77467	6.67991
Taf11	FBgn0011291	0.00876697	0.0204729	2.05715	0.403214	0.303224	0.110493	0.518236	0.138777	3.54099	3.58021	3.58781	4.06332	3.94741	4.0225	4.25341	3.92389	3.74135	3.91883	4.08114	4.26319	3.81615	3.53245	3.77674	4.3795	4.13109	4.08526
loqs	FBgn0032515	1.2e-05	0.000166827	4.92082	0.403029	4.96e-06	4.17662e-05	5.30452	0.440344	4.48724	4.46156	4.44068	4.68867	4.74404	4.73053	4.88315	4.8464	4.86902	5.07466	5.06655	4.92977	4.87096	5.03275	4.8068	5.19667	5.07049	5.04033
CG15878	FBgn0035316	0.256491	0.212222	0.590928	0.402009	0.0129412	0.0109261	1.88803	0.983781	0.468267	0.193031	0.379647	0.262153	0.13435	0.249279	0.221383	0.844251	1.18134	0.930606	0.620073	0.410132	1.18134	2.22745	0.583505	0.494264	0.44114	0.412717
CG17323	FBgn0032713	0.000707188	0.00324694	3.15047	0.40155	3.09e-06	3.02823e-05	5.51004	0.725097	5.67337	5.53125	5.53509	4.42958	4.6079	4.54489	6.0488	5.9529	5.94265	4.71416	4.53608	4.30935	6.365	6.19977	6.35023	4.85947	4.78607	4.74275
eIF4E-7	FBgn0040368	0.405395	0.271436	0.392122	0.401465	0.0316604	0.0206897	1.49948	1.13185	0.515077	0.393615	0.0773884	0.0375005	0.0382134	0.191786	0.0479254	1.07685	1.0657	0.876733	0.609355	0.184253	1.57602	2.58995	0.215664	0.0750187	0.133657	0.1384
CG15649	FBgn0034563	0.461881	0.291774	0.33547	0.401401	0.698476	0.214116	0.155849	-0.209556	0.74381	1.05695	1.02297	2.11732	0.538712	1.48018	2.62338	0.615382	0.789171	1.08732	1.6897	1.70156	0.450762	0.290638	1.45366	1.28786	1.20175	1.76287
cype	FBgn0015031	0.000188547	0.00121502	3.72458	0.401315	0.000178157	0.000530669	3.7492	0.403947	9.7567	9.77881	9.85271	8.79679	8.88587	8.88587	10.0819	10.2743	10.236	10.152	10.0579	9.94781	10.2886	10.1594	10.152	10.443	10.2419	10.1726
CG34007	FBgn0054007	0.13405	0.141725	0.872733	0.400519	0.000489455	0.00110264	3.31029	-1.17866	2.09772	2.2024	2.47173	1.81698	1.86743	1.92839	3.00347	2.65338	2.31655	0.852006	0.903877	1.64928	0.895311	0.756386	1.58416	0.899636	0.924483	1.03623
CG32373	FBgn0052373	0.133071	0.141083	0.875917	0.40036	0.210435	0.0818211	0.676882	-0.328754	1.97488	1.56247	1.7477	1.71548	2.01593	2.11732	2.49298	2.17395	1.8192	1.53875	1.82687	2.02554	1.26028	1.00112	2.0374	2.06054	1.96829	2.10584
CG7024	FBgn0029722	0.291452	0.226973	0.535433	0.400339	0.0232518	0.0166043	1.63354	0.943043	0.924801	0.706481	0.894254	0.941977	1.01172	1.16872	0.834789	1.50767	1.38409	1.538	1.25883	0.990747	1.81983	2.73495	0.799892	1.15914	0.899636	1.01517
mRpL40	FBgn0037892	7.58e-05	0.0006288	4.12033	0.4003	0.000599221	0.00126333	3.22241	0.314386	4.73898	4.61468	4.53953	4.45418	4.37758	4.21799	5.08981	4.97647	5.02781	4.84822	4.85415	4.84474	4.86208	4.91684	5.05743	5.04924	5.00274	4.92755
CG12162	FBgn0037329	0.00024448	0.00147711	3.61176	0.400238	2.43e-06	2.55589e-05	5.61439	0.649758	6.18409	6.0333	6.08939	5.57464	5.69699	5.59017	6.42283	6.54923	6.53543	6.51022	6.38907	6.18309	6.74143	6.83561	6.679	6.57113	6.49758	6.41727
CG4169	FBgn0250814	0.00159589	0.00584034	2.797	0.40018	0.000201583	0.000575951	3.69555	0.518944	9.53498	9.5172	9.57263	8.28322	8.32318	8.19711	9.77263	10.0672	9.98552	9.73598	9.55952	9.29921	10.1043	10.0751	10.0023	9.54336	9.56737	9.39671
CG15772	FBgn0029799	0.0029025	0.00911504	2.53723	0.399838	0.000718374	0.00143446	3.14365	0.483787	2.93289	2.79275	2.69717	2.21136	2.37012	2.28537	3.3301	3.11313	3.17909	2.8984	2.62976	2.68741	3.50562	3.09874	3.26981	3.21893	3.12227	3.02668
CG9008	FBgn0028540	0.000251695	0.00150726	3.59913	0.399027	0.00153942	0.00245711	2.81264	0.317363	4.58674	4.65941	4.6297	4.72813	4.87959	4.62703	5.02301	5.00643	5.04349	5.47086	5.31007	5.36187	4.95142	4.8	5.07653	5.56153	5.62922	5.76589
DJ-1alpha	FBgn0033885	0.025173	0.0445825	1.59907	0.398834	0.00215709	0.00309233	2.66613	0.606582	0.757673	1.13286	0.743049	1.32621	1.11882	1.16718	1.57689	1.22731	1.02588	1.33566	1.42477	1.63248	1.51099	1.29574	1.6466	2.02704	1.70753	1.82046
Arc42	FBgn0038742	3.39e-05	0.000349528	4.4698	0.397873	0.000294041	0.000765474	3.53159	0.312596	5.11416	5.16644	5.18376	5.23423	5.20459	5.23079	5.61669	5.46229	5.579	5.93148	5.86403	5.72421	5.45458	5.37272	5.57485	6.24466	6.21125	6.10662
tRNA:CR32093	FBgn0052093	0.310482	0.235234	0.507964	0.397808	0.123204	0.0537647	0.909375	0.622868	1.46474	0.908814	0.793721	1.46774	0.718275	1.91985	1.03725	2.33762	0.985827	0.975998	1.04469	1.30755	1.80983	1.25266	1.97339	2.62597	2.45961	2.40935
mir-986	FBgn0262316	0.345193	0.24901	0.461938	0.397477	0.147333	0.0618413	0.8317	-0.626597	2.33302	1.92261	1.77509	2.11402	1.7506	1.77813	2.50981	2.26388	2.44946	2.73703	2.33378	2.60338	1.0916	0.685258	2.37406	1.75092	2.64654	3.16618
CG13319	FBgn0033781	0.010779	0.0237537	1.96742	0.397407	0.258158	0.0966041	0.588114	0.156514	3.63009	3.61591	3.70735	3.92925	3.85562	3.74035	4.122	3.94662	4.07695	3.68868	3.37493	3.80696	4.00634	3.48022	3.93634	3.67523	3.69758	3.80973
CG12079	FBgn0035404	0.000272115	0.00160007	3.56525	0.396461	0.000200799	0.000574283	3.69724	0.410836	8.5408	8.56102	8.58503	7.85819	8.06419	7.91929	8.86789	9.03986	8.96848	8.67048	8.69392	8.53219	9.08727	8.89648	8.9356	8.75394	8.71744	8.50584
CG3621	FBgn0025839	8.81e-05	0.00069604	4.05502	0.396434	0.000192017	0.00055806	3.71666	0.363016	8.23823	8.08245	8.19711	7.44509	7.55536	7.43599	8.43933	8.67048	8.59728	8.30429	8.26067	8.20523	8.57828	8.44002	8.58854	8.50978	8.41435	8.32903
CoVIb	FBgn0031066	0.00296115	0.00923968	2.52854	0.396188	0.000418538	0.000993225	3.37827	0.514298	9.34347	9.24491	9.35234	8.04964	8.17738	8.10374	9.38674	9.86426	9.87827	8.62976	8.53086	8.52213	9.92158	9.80843	9.7536	8.52299	8.40184	8.38722
CG11722	FBgn0037777	0.00204903	0.00700869	2.68845	0.395327	0.000224482	0.00062825	3.64882	0.524209	4.33036	3.94904	3.98521	3.50969	3.37571	3.24216	4.4113	4.49909	4.54019	3.78983	3.67723	3.70778	4.60947	4.72813	4.49962	3.83493	3.91249	3.72654
CheA46a	FBgn0262594	0.0025307	0.00824365	2.59676	0.394982	0.166635	0.0680336	0.778234	0.153059	3.18974	3.11461	3.09909	2.43162	2.58524	2.55513	3.45226	3.44507	3.69106	3.19433	3.2101	3.18443	3.29424	3.04867	3.5197	3.24499	3.11531	3.34263
CG14523	FBgn0039612	0.000572476	0.00281008	3.24224	0.394661	0.932907	0.266943	0.0301616	-0.00731612	3.50509	3.72068	3.66796	3.17353	3.11313	3.08406	4.12389	3.92833	4.02549	4.00355	3.99465	3.80852	3.67275	3.49571	3.70332	3.94848	3.69385	3.82396
CG12929	FBgn0033429	0.0115628	0.0248789	1.93694	0.394645	0.5987	0.19019	0.222791	0.0716737	2.86965	3.0528	2.99957	3.16427	2.95521	3.05648	3.56292	3.3584	3.18463	3.30249	3.1272	3.31298	3.24091	2.70311	3.19303	3.19356	3.20511	3.29497
CG6178	FBgn0039156	0.0142668	0.0291913	1.84567	0.394501	0.720695	0.219544	0.142248	0.0504351	5.06777	5.07854	5.1979	5.15191	4.85852	4.91949	5.856	5.34034	5.33138	5.3712	5.25913	5.39716	5.22533	5.01625	5.25394	5.20035	5.28051	5.52835
CG43841	FBgn0264393	0.00360938	0.0107126	2.44257	0.394068	0.00664587	0.00675749	2.17745	0.357907	5.96006	5.63327	5.72028	5.52404	5.51442	5.32323	6.14398	6.11273	6.2391	6.29534	6.35083	6.38379	6.00608	5.98278	6.39847	6.36116	6.29534	6.43882
CG4073	FBgn0037827	0.361363	0.254842	0.442056	0.393893	0.0314434	0.0205948	1.50247	1.01072	0.458797	0.0599504	0.0548901	0.0574667	0.131763	0.0971673	0.0799773	0.875882	0.799457	0.747055	0.390191	0.14085	1.11264	2.3426	0.150567	0.181446	0.0988184	0.0872085
CG13917	FBgn0035237	0.000370123	0.00201081	3.43165	0.393873	0.273417	0.101362	0.563174	0.09239	4.98141	4.88933	4.86418	4.84822	4.92657	4.90226	5.38526	5.21038	5.32091	5.35818	5.20403	5.12995	4.97427	4.9233	5.11453	5.02301	4.94894	4.73898
CG2924	FBgn0023528	0.000151326	0.00103269	3.82009	0.393773	0.0757901	0.0373826	1.12039	-0.140809	4.77989	4.82318	4.69954	4.82677	4.71811	4.68867	5.04872	5.27018	5.16504	4.99253	4.97578	4.79915	4.68104	4.49849	4.70066	4.57112	4.60976	4.65673
CG6985	FBgn0039017	0.144137	0.14842	0.841225	0.393661	0.203604	0.0796396	0.691214	-0.338768	1.90852	2.17229	2.15126	2.38695	2.46089	2.25644	3.07171	2.54659	1.79475	1.92853	2.00854	2.06868	1.39715	1.72734	2.09126	2.17355	2.17788	2.24535
CG17648	FBgn0031364	0.282595	0.224019	0.548836	0.393448	0.0443466	0.0261367	1.35314	0.785372	0.282663	0.148364	0.139382	0.145158	0.153638	0.106827	0.250153	0.873108	0.627491	0.596716	0.624142	0.104373	0.726239	2.02554	0.174748	0.257551	0.210535	0.0971038
CG14502	FBgn0034321	0.0025355	0.00825361	2.59594	0.393367	0.183948	0.0733806	0.735305	0.146	4.52246	4.36773	4.29878	3.72534	3.85511	3.6377	4.77594	4.71727	4.87587	4.87213	5.03527	4.824	4.53834	4.32386	4.76478	4.97481	4.84729	4.89899
MFS18	FBgn0025684	0.00659711	0.0167232	2.18065	0.393337	0.921733	0.264563	0.0353949	-0.0120377	3.02668	2.98492	3.11176	3.11971	3.05311	3.09831	3.71709	3.18734	3.39894	3.24335	3.17577	3.26415	2.93686	2.86875	3.28164	3.33521	3.26638	3.25253
mRpS18A	FBgn0051450	0.00453232	0.0125269	2.34368	0.393218	0.000977321	0.00176334	3.00996	0.489118	4.34443	4.37197	4.32315	3.96998	3.70273	3.5095	4.90079	4.77352	4.54489	4.29416	4.51852	4.21714	4.82186	4.79397	4.89108	4.52782	4.59649	4.55533
CG30491	FBgn0050491	1.7e-06	4.40593e-05	5.76955	0.393097	3.78e-06	3.45669e-05	5.42251	0.363849	3.27807	3.22043	3.2402	3.31444	3.39418	3.26415	3.62787	3.69552	3.59459	3.36286	3.50292	3.40318	3.53245	3.6721	3.62569	3.64979	3.64176	3.60481
CG11982	FBgn0037653	0.000131767	0.000934017	3.88019	0.393011	3.69e-05	0.00016226	4.43297	0.45166	4.84156	4.91332	4.71017	5.31338	5.29114	5.28694	5.16667	5.26271	5.21471	5.56212	5.45899	5.34034	5.29382	5.3967	5.12951	5.52632	5.44471	5.45356
CG10177	FBgn0039083	0.545884	0.323996	0.2629	0.39298	0.101968	0.0463295	0.991536	1.11966	0.953406	1.08732	1.15914	0.737235	0.828292	0.755144	0.606023	1.92825	1.84453	1.88059	1.57611	0.62566	2.26249	3.76171	0.534642	0.471593	0.508473	0.489013
Snmp1	FBgn0260004	0.0212892	0.0392886	1.67184	0.392887	0.152479	0.0634527	0.81679	-0.226753	3.30008	3.2465	3.40265	3.53971	3.22546	3.39577	3.59459	3.75599	3.77731	3.54944	3.70652	3.74538	3.1794	2.68307	3.4065	3.27097	3.29913	3.45285
mfas	FBgn0260745	0.00844585	0.0199489	2.07336	0.392557	0.000506208	0.00112456	3.29567	0.587721	6.33253	6.42769	6.39389	6.64156	6.54257	6.69189	6.7153	6.81419	6.80228	7.05393	7.11841	6.9367	7.08656	7.19116	6.63955	7.07258	6.9626	6.70865
CG43089	FBgn0262535	0.489702	0.302066	0.310068	0.392445	0.0573962	0.0310316	1.24112	1.15728	1.12686	0.640879	0.298254	0.37188	0.303794	0.397925	0.466073	1.43705	1.34021	1.44612	0.970755	0.443587	1.88503	3.24216	0.410627	0.258952	0.449369	0.42304
CG7148	FBgn0046301	1.21e-05	0.000166827	4.91721	0.391459	1.88e-05	0.00010224	4.72584	0.374233	4.66702	4.71416	4.63682	4.04588	4.06829	4.04939	5.07049	5.10008	5.02181	4.31536	4.52583	4.24489	5.05398	4.9981	5.08862	4.18946	4.19463	4.15334
CG10352	FBgn0030348	0.325777	0.241181	0.48708	0.391442	0.320036	0.115325	0.494801	-0.396314	1.53164	1.79017	1.9486	2.00841	2.1315	2.38877	2.96336	1.10122	2.38015	3.33725	3.02512	3.77952	1.44518	0.91751	1.71877	2.40282	2.46652	2.63897
CG31562	FBgn0051562	0.258457	0.212965	0.587612	0.391425	0.795025	0.236541	0.0996192	-0.0876485	0.701143	1.39982	1.42963	0.760234	0.563457	0.681042	1.56274	2.01452	1.12761	2.22655	1.19449	2.11703	0.98172	0.671737	1.61419	1.86474	2.18478	2.30229
caup	FBgn0015919	0.138845	0.144985	0.85747	0.391205	0.141295	0.0597876	0.849873	-0.388562	2.40185	2.59746	2.51557	2.6468	2.37082	2.46697	3.43231	2.53542	2.72076	2.77894	2.78868	2.71126	1.91394	1.72585	2.7094	2.6404	2.89366	2.87782
CG4714	FBgn0033819	0.471397	0.29519	0.326613	0.391194	0.0454663	0.0265676	1.34231	1.17401	0.615154	0.44839	0.189109	0.271288	0.414391	0.330172	0.270952	1.11127	1.04402	1.17027	0.840397	0.256492	1.76672	2.91247	0.0954789	0.248026	0.271256	0.246057
Yp2	FBgn0005391	0.15821	0.158139	0.800766	0.390293	0.761528	0.228851	0.118314	-0.0805208	0.312993	0.577831	0.534314	1.46281	1.47772	1.60866	1.24128	0.532716	0.82202	4.01088	4.50276	3.31735	0.195298	0.234953	0.753324	0.812617	0.818478	0.838887
CG16820	FBgn0032495	0.0537088	0.0759038	1.26995	0.390216	0.0893437	0.0419532	1.04894	0.337217	3.61292	3.38105	3.64392	2.71522	2.50454	2.61512	3.48696	3.92505	4.39652	3.00962	3.00717	2.92748	3.90919	3.82426	3.91607	3.13432	2.80007	3.25803
CG3557	FBgn0031423	0.476141	0.297258	0.322264	0.390178	0.0620364	0.0326371	1.20735	1.09147	0.733932	0.153918	0.412717	0.288	0.158941	0.258795	0.0941642	1.1022	1.27473	1.04384	0.669874	0.280869	1.46705	2.92748	0.180442	0.202322	0.112311	0.185653
MAGE	FBgn0037481	0.0130052	0.0272687	1.88588	0.389943	0.430814	0.146535	0.36571	-0.109127	2.7969	2.74117	2.61677	3.82396	3.6824	3.69502	3.29376	3.05441	2.9765	3.43018	3.12841	3.34369	2.63589	2.29053	2.90105	3.24928	3.20282	3.27718
CG1927	FBgn0027547	1.44e-05	0.000188146	4.84164	0.389114	0.0350319	0.022295	1.45554	0.132146	6.71723	6.69189	6.71631	6.84534	6.9626	6.96368	7.03975	7.17256	7.08047	7.28698	7.28698	7.26606	6.87449	6.69555	6.95183	7.10652	7.05884	7.11687
CG4603	FBgn0035593	7.61e-05	0.0006288	4.11862	0.388846	0.000430696	0.0010137	3.36583	0.318271	4.64269	4.66098	4.57793	4.87431	5.01934	4.88997	5.09496	5.00788	4.94529	5.40669	5.26056	5.23745	4.95763	5.03556	4.84322	5.35105	5.26218	5.17404
CG6345	FBgn0037816	0.0216199	0.0396901	1.66515	0.38869	0.18607	0.0740727	0.730324	0.206599	2.96336	2.80622	2.85229	2.27077	2.4805	2.49434	3.38283	3.38105	3.02406	2.73993	3.01121	2.70311	3.12185	2.77022	3.34959	3.05751	2.80622	2.8755
CG32819	FBgn0052819	0.314034	0.236829	0.503023	0.388192	0.0250574	0.017519	1.60106	0.945245	0.609355	0.412717	0.46365	0.623669	0.637858	0.517562	0.634971	0.819833	1.19549	1.06166	0.86049	0.551182	1.38977	2.49434	0.43735	0.544724	0.55758	0.685056
Hsp27	FBgn0001226	0.580693	0.336035	0.236053	0.387887	0.411833	0.141301	0.385279	0.580919	1.96553	3.43384	2.4758	3.61956	4.89899	4.20652	2.36064	3.83071	2.84749	4.24791	3.28807	2.42219	4.04939	3.82574	1.7428	2.24852	3.15836	2.48802
CheB42a	FBgn0053348	0.000718353	0.00327916	3.14366	0.387827	0.794479	0.236477	0.0999176	0.0229228	5.90535	5.58078	5.6554	5.02429	5.04033	5.01119	6.06807	6.0988	6.13815	6.28624	6.29408	6.16153	5.74523	5.62445	5.84063	6.19692	5.93054	6.00126
CG13008	FBgn0030780	0.427838	0.279295	0.368721	0.387752	0.0392469	0.024039	1.40619	1.09296	0.609355	0.48556	0.200493	0.199114	0.0939591	0.159139	0.252287	1.02637	1.18001	0.85364	0.673173	0.389018	1.5856	2.78061	0.20807	0.196554	0.199531	0.29312
CG8814	FBgn0031478	0.000441222	0.00229731	3.35534	0.387713	0.000146983	0.000457756	3.83273	0.441397	5.2257	5.37356	5.32762	5.04793	5.08058	4.98403	5.83107	5.63804	5.62091	5.71874	5.53479	5.40487	5.82651	5.62922	5.79534	5.83732	5.79439	5.77223
Cyp6a21	FBgn0033981	0.139123	0.145243	0.856601	0.387422	0.0416286	0.025007	1.38061	0.557727	4.09135	4.30493	4.31623	3.05311	3.10407	3.34423	3.8887	4.87587	5.11021	4.22291	4.26735	4.13873	4.68099	4.64418	5.06053	4.63344	4.58804	4.36679
CG5718	FBgn0036222	0.448387	0.287034	0.348347	0.387419	0.0415083	0.0249596	1.38187	1.12817	0.240998	0.321275	0.124098	0.0276344	0.0271021	0.0250761	0.0333825	0.909811	0.905435	0.839523	0.529038	0.0260318	1.29101	2.71429	0.0655882	0.0263429	0.0764068	0.208775
Got2	FBgn0001125	0.000525667	0.0026327	3.27929	0.387386	7.52e-06	5.39829e-05	5.12378	0.617477	6.40904	6.36116	6.36382	6.01301	6.29408	6.19474	6.8284	6.63217	6.83561	6.9352	6.66432	6.68867	7.02615	6.92845	7.03185	7.29009	7.21942	7.26338
Hr39	FBgn0261239	0.0222341	0.0404811	1.65298	0.387385	0.00464412	0.00524391	2.3331	-0.51212	3.43149	3.64293	3.42246	3.65888	3.50339	3.31987	3.76487	4.07155	3.82263	3.74135	3.50339	3.89325	3.06659	2.66655	3.22739	3.06257	3.0734	3.16654
Cpr	FBgn0015623	0.0870073	0.106056	1.06044	0.386888	0.750047	0.226314	0.124912	-0.0676727	7.3614	7.50233	7.55776	7.29194	7.00976	7.11687	8.43515	7.54448	7.60251	7.80715	7.75394	7.362	7.63886	7.28952	7.29009	7.31241	7.50477	7.41585
CG4972	FBgn0032217	7e-07	2.50694e-05	6.1549	0.386473	0.0159743	0.0127241	1.79658	-0.115284	4.87431	4.89991	4.89716	5.27508	5.16257	5.18045	5.37493	5.19923	5.25663	5.52886	5.60995	5.59017	4.74208	4.77418	4.80925	5.35296	5.31514	5.31884
CG10920	FBgn0029963	0.448489	0.287038	0.348248	0.38633	0.0578385	0.0312061	1.23778	1.03398	0.569166	0.351975	0.214789	0.118207	0.0356537	0.124947	0.112141	1.01055	1.17223	1.04345	0.55155	0.176926	1.51557	2.63489	0.0874186	0.0718508	0.240495	0.20951
CG1628	FBgn0030218	0.0820828	0.102073	1.08575	0.386103	0.823042	0.242664	0.084578	0.0465128	2.92584	3.34348	2.82011	2.82342	2.75181	2.65423	3.78387	2.99429	3.46957	3.77203	4.05712	3.37847	3.00114	3.13012	3.09771	3.54059	3.74248	3.63391
CG4686	FBgn0038739	0.00486013	0.0132553	2.31335	0.38577	0.000557545	0.00120266	3.25372	0.521222	4.03217	3.92947	3.99052	4.10132	4.09006	4.03517	4.36235	4.32374	4.42339	4.27766	4.1979	4.07695	4.48214	4.824	4.20969	4.05742	4.00988	4.08743
CG43237	FBgn0262882	0.414429	0.274484	0.38255	0.3855	0.0665584	0.0340916	1.1768	0.920051	0.609355	0.440624	0.419707	0.151801	0.315096	0.11202	0.264497	0.903991	1.4577	0.878045	0.830354	0.45962	1.19699	2.69637	0.336477	0.133944	0.219173	0.365594
CG6180	FBgn0032453	1.72e-05	0.000214113	4.76447	0.385442	3.32e-05	0.000150365	4.47886	0.360002	5.96948	6.03304	5.9772	5.98378	5.85138	5.85389	6.508	6.23514	6.3929	6.53107	6.50113	6.48386	6.3468	6.33569	6.37724	6.66185	6.58859	6.65279
Cyp4p1	FBgn0015037	0.00515083	0.01392	2.28812	0.385358	0.765162	0.229631	0.116247	-0.0345091	5.79223	5.51914	5.87842	5.87685	5.83949	6.14247	6.05039	6.20996	6.08553	6.04692	6.18409	6.25911	5.54186	5.69657	5.84784	5.98095	5.80395	5.97834
Fis1	FBgn0039969	0.000353035	0.00193572	3.45218	0.385265	0.000461794	0.00106336	3.33555	0.372869	6.62244	6.38379	6.46434	6.7123	6.51485	6.65087	6.88317	6.94735	6.79584	6.75936	6.98662	6.99806	6.82647	6.81419	6.94852	6.96667	6.9422	6.99806
Cyp4e1	FBgn0015034	0.0312414	0.0520272	1.50527	0.385056	0.527315	0.172023	0.27793	0.102796	4.33897	4.41797	4.06269	3.35508	3.43611	3.27201	5.00544	4.40342	4.56595	4.22433	4.2493	3.85841	4.49478	4.16109	4.47216	4.31996	4.26808	4.38133
klhl10	FBgn0040038	0.419131	0.276286	0.37765	0.385002	0.0219657	0.0159517	1.65825	1.21034	0.609355	0.291463	0.455401	0.411476	0.438473	0.290522	0.35758	1.0089	1.14475	0.81819	0.918637	0.429179	1.68635	2.92584	0.375061	0.246827	0.325759	0.359487
CG5895	FBgn0036560	0.00128959	0.00500519	2.88955	0.384848	0.0453958	0.026548	1.34298	0.205837	4.40167	4.38498	4.41225	4.30785	4.4619	4.50435	4.68457	4.71746	4.95142	4.92872	4.95267	4.86527	4.66079	4.43119	4.72443	4.97439	4.70225	4.85591
CG33098	FBgn0053098	0.0029494	0.00922137	2.53027	0.384444	0.00272343	0.00361374	2.56488	0.388965	4.75349	4.60414	4.50435	3.98362	3.90861	3.73121	4.93582	5.07161	5.00788	4.547	4.7251	4.43581	5.04404	4.82914	5.1557	4.81053	4.71298	4.60704
CG14222	FBgn0031043	0.00107973	0.00441847	2.96668	0.384299	0.475261	0.158536	0.323068	-0.0662662	4.10676	3.96111	3.88604	4.40578	4.53393	4.38287	4.35988	4.29099	4.45594	4.35432	4.32413	4.5245	3.92346	3.76221	4.06945	4.23085	4.12278	4.33608
Cchl	FBgn0038925	0.000123518	0.000895762	3.90827	0.384262	7.74e-06	5.48762e-05	5.11126	0.514763	6.93803	6.82647	6.84485	6.03636	6.14398	6.04497	7.16155	7.32414	7.27644	6.91419	6.79913	6.73509	7.41951	7.37272	7.3614	6.8865	6.73836	6.60635
CG10824	FBgn0038865	0.0217989	0.0398878	1.66157	0.384209	0.100172	0.0457802	0.999254	0.259789	4.23702	4.50697	4.51398	4.38223	4.52035	4.48485	5.17487	4.57293	4.6628	5.02491	4.93831	5.00045	4.70358	4.53622	4.79754	5.63858	5.33515	5.68725
CG12126	FBgn0033280	0.546945	0.324475	0.262056	0.384015	0.088651	0.0416825	1.05232	1.14787	1.33982	0.572611	0.246472	0.110576	0.117326	0.251257	0.187839	1.72734	1.39576	0.811116	0.8939	0.236136	1.99064	3.33332	0.278537	0.100539	0.180715	0.221383
CG6576	FBgn0035924	0.478915	0.29839	0.319742	0.383615	0.0902794	0.0422702	1.04441	0.966992	0.629437	0.370573	0.362125	0.189109	0.204626	0.0462745	0.196304	0.974818	1.34186	1.07654	0.985675	0.450571	1.33107	2.87319	0.0588516	0.103236	0.185816	0.261677
[truncated: 8,598 more rows]
