# Supplementary material for: Circadian gene variants and the skeletal muscle circadian clock contribute to the evolutionary divergence in longevity across Drosophila populations
Source: HighWire-hosted journal article supplement (doi:10.1101/gr.246884.118), 2019-06-27
Supplement: Supplemental_Table_S4.xlsx [file Supplemental_Table_S4.xlsx]

## Sheet: Legend
Supplemental Table S4
Comparison of log2 fold changes in mRNA and protein levels across genotype (B3, O1, and O3) and age comparisons (1 and 6 weeks old).

## Sheet: mRNA and Protein log2FC
gene	FBgn ID	mRNA O ave vs B young	mRNA O1 vs B3 young	mRNA O3 vs B3 young	mRNA B3 old vs young	mRNA O1 old vs young	mRNA O3 old vs young	Protein O ave vs B3 young	Protein O1 vs B3 young	Protein O3 vs B3 young	Protein B3 old vs young	Protein O1 old vs young	Protein O3 old vs young
CG9192	FBgn0035193	3.32783	3.65066	3.005	0.1498	-0.482657	-0.46789	#N/A	#N/A	#N/A	#N/A	#N/A	#N/A
CG15263	FBgn0028853	3.10757	3.59985	2.61528	-1.18065	0.0181647	0.303153	#N/A	#N/A	#N/A	#N/A	#N/A	#N/A
Hsp26	FBgn0001225	2.85421	2.64563	3.0628	0.66704	0.147048	-0.182604	2.15284	2.08937	2.21631	1.22293	0.291731	-0.0949179
CG14893	FBgn0038451	2.51944	2.88507	2.15381	-0.271758	-1.39001	-0.0451332	#N/A	#N/A	#N/A	#N/A	#N/A	#N/A
LysP	FBgn0004429	2.47011	2.47049	2.46973	-0.128976	0.0383112	0.066117	3.02732	3.09593	2.95871	#DIV/0!	#DIV/0!	#DIV/0!
CG9029	FBgn0031746	2.34252	0.350025	4.33501	-0.927684	1.03599	-0.119574	1.18953	0.729013	1.65004	0.510509	0.47478	0.209975
CG15109	FBgn0034416	2.26675	1.63256	2.90094	-0.540295	-0.493661	-1.23836	#N/A	#N/A	#N/A	#N/A	#N/A	#N/A
CheB38a	FBgn0067312	2.25224	3.07861	1.42586	-0.399476	0.110296	0.405687	#N/A	#N/A	#N/A	#N/A	#N/A	#N/A
Acp53Ea	FBgn0015584	2.2278	-0.371623	4.82722	-0.619629	1.16216	-0.505397	0.928653	0.452453	1.40485	0.927568	0.368307	0.761837
CG42481	FBgn0259971	2.22503	-0.511725	4.96179	-0.919577	0.998355	-0.654815	#N/A	#N/A	#N/A	#N/A	#N/A	#N/A
CG43392	FBgn0263249	2.21156	0.0563091	4.36682	-0.666126	0.941765	-0.730662	#N/A	#N/A	#N/A	#N/A	#N/A	#N/A
Mst57Dc	FBgn0011670	2.20861	-0.15307	4.57029	-0.723115	1.0372	-0.759319	1.34431	0.724964	1.96365	0.482612	0.0138842	-0.342688
CG11598	FBgn0038067	2.20268	0.605638	3.79972	1.05576	1.26179	-0.857525	2.5187	2.24953	2.78786	#DIV/0!	#DIV/0!	#DIV/0!
Acp53C14b	FBgn0034153	2.16531	-0.346291	4.67691	-0.86485	1.09905	-0.451592	1.05404	0.57376	1.53432	0.951307	0.392301	0.563124
Acp26Aa	FBgn0002855	2.12426	-0.054372	4.3029	-1.24087	0.839528	-0.885492	1.05744	0.826298	1.28858	0.676644	0.198461	-0.00839347
CG34040	FBgn0054040	2.10914	2.31243	1.90586	-0.226746	0.193331	0.24132	1.44836	1.57576	1.32096	-0.6968	1.01941	0.073179
CG18284	FBgn0043825	2.10834	0.133806	4.08288	-1.1778	0.63489	-0.844548	0.915307	0.531866	1.29875	0.818273	0.146683	0.286184
CG42852	FBgn0262099	2.10583	-0.388005	4.59966	-0.798233	0.852474	-0.95416	#N/A	#N/A	#N/A	#N/A	#N/A	#N/A
Acp63F	FBgn0015585	2.09213	0.262148	3.92212	-0.0398825	0.652883	-0.535335	1.89723	1.00004	2.79442	-0.27145	-1.13758	-1.74682
Mst57Da	FBgn0011668	2.08079	-0.857497	5.01907	-0.889693	1.03521	-0.509467	0.997156	0.28183	1.71248	1.10538	0.75173	0.52851
Acp32CD	FBgn0023415	2.08055	0.213963	3.94713	-1.20604	1.26748	-0.210253	#N/A	#N/A	#N/A	#N/A	#N/A	#N/A
lectin-29Ca	FBgn0040098	2.05206	0.233531	3.87058	-0.299109	0.996959	-0.87277	0.906073	0.463553	1.34859	0.930084	0.465252	0.610083
Sfp24F	FBgn0259958	2.00423	0.217954	3.7905	-1.01454	0.772344	-0.726391	1.43089	0.502167	2.35961	0.476663	0.255543	-0.307225
CG2955	FBgn0031585	1.98819	1.4533	2.52307	-1.4565	-0.224821	-2.76369	#N/A	#N/A	#N/A	#N/A	#N/A	#N/A
CG18628	FBgn0036091	1.97034	0.661842	3.27884	-0.730924	0.524587	-0.361307	#DIV/0!	#DIV/0!	#DIV/0!	#DIV/0!	#DIV/0!	#DIV/0!
CG12027	FBgn0035585	1.96241	2.28807	1.63675	0.247479	-0.367836	-2.80176	#N/A	#N/A	#N/A	#N/A	#N/A	#N/A
CG18662	FBgn0040963	1.95321	1.56332	2.3431	-1.39317	-0.201062	-2.16384	1.58076	1.46103	1.70048	#DIV/0!	#DIV/0!	#DIV/0!
CG7045	FBgn0038978	1.95302	1.56766	2.33838	-0.772093	-0.382795	-2.29924	#N/A	#N/A	#N/A	#N/A	#N/A	#N/A
BG642312	FBgn0047334	1.94486	-0.207185	4.09691	-0.330802	0.242075	-0.710995	#DIV/0!	#DIV/0!	#DIV/0!	#DIV/0!	#DIV/0!	#DIV/0!
Mst77F	FBgn0086915	1.94208	1.59319	2.29096	-1.32183	-0.208012	-1.86331	#N/A	#N/A	#N/A	#N/A	#N/A	#N/A
CG43680	FBgn0263763	1.9402	1.43298	2.44741	-0.188604	0.0956132	0.0464384	#N/A	#N/A	#N/A	#N/A	#N/A	#N/A
CG43319	FBgn0263024	1.93858	-0.301702	4.17886	-1.14419	0.156272	-0.929959	#N/A	#N/A	#N/A	#N/A	#N/A	#N/A
dro4	FBgn0052282	1.93545	1.93692	1.93397	-0.272317	-0.0679963	-0.085228	1.88639	1.69064	2.08214	-0.399389	0.35024	0.774548
scpr-A	FBgn0037889	1.9303	1.30516	2.55544	0.341319	-0.0308129	-2.18052	1.99919	1.90307	2.09532	0.51382	0.074737	-0.262357
loopin-1	FBgn0259795	1.9235	1.40516	2.44183	-1.69187	0.0202587	-2.227	1.24491	1.12104	1.36879	-0.230346	-0.182373	-0.922987
CG17575	FBgn0250842	1.92305	0.127835	3.71827	-1.16794	1.47637	-0.226048	0.605484	0.405218	0.805751	#DIV/0!	#DIV/0!	#DIV/0!
Acp36DE	FBgn0011559	1.91772	-0.31158	4.14703	-1.15534	1.00492	-0.784057	1.03446	0.668466	1.40046	0.643486	0.187301	0.122618
CG5017	FBgn0039553	1.91556	1.4513	2.37982	-1.28292	-0.46119	-2.98537	#N/A	#N/A	#N/A	#N/A	#N/A	#N/A
BG642167	FBgn0250831	1.91374	-0.0670385	3.89451	-0.562864	1.25963	-0.502222	#N/A	#N/A	#N/A	#N/A	#N/A	#N/A
CG15219	FBgn0040519	1.91124	1.54872	2.27375	-2.18266	0.0282024	-1.91784	#N/A	#N/A	#N/A	#N/A	#N/A	#N/A
CG31872	FBgn0051872	1.90014	-0.42925	4.22953	-1.48845	1.03689	-0.783675	0.995585	0.543214	1.44796	0.984634	0.315406	0.374357
Acp76A	FBgn0015586	1.89645	0.070658	3.72224	-1.12072	0.871009	-1.05622	0.999981	0.626198	1.37376	0.49087	0.248199	0.470234
CG12861	FBgn0033953	1.89565	1.37459	2.41672	-2.31735	-0.008824	-2.39619	#N/A	#N/A	#N/A	#N/A	#N/A	#N/A
CG31948	FBgn0051948	1.89335	1.51693	2.26976	-2.72106	-0.0457347	-2.31284	#N/A	#N/A	#N/A	#N/A	#N/A	#N/A
CG17470	FBgn0032869	1.89228	1.47657	2.30798	-2.18188	-0.162878	-2.05622	#N/A	#N/A	#N/A	#N/A	#N/A	#N/A
Dpy-30L2	FBgn0035491	1.88771	1.4968	2.27862	-0.708295	-0.231878	-2.35636	#N/A	#N/A	#N/A	#N/A	#N/A	#N/A
CG31883	FBgn0032122	1.88738	-0.0793118	3.85408	-0.915772	0.948961	-0.85342	1.19659	0.509334	1.88386	0.624267	0.372249	-0.123825
Acp70A	FBgn0003034	1.88618	-0.808852	4.58121	-0.997888	1.14224	-0.54458	1.14238	0.504441	1.78032	0.936847	0.546759	0.242058
Mst57Db	FBgn0011669	1.88502	-0.958463	4.72851	-0.858088	0.716505	-0.586136	#N/A	#N/A	#N/A	#N/A	#N/A	#N/A
CG4375	FBgn0031295	1.88322	1.49229	2.27414	-2.14866	-0.0681264	-2.97623	#N/A	#N/A	#N/A	#N/A	#N/A	#N/A
Sfp26Ad	FBgn0261055	1.86398	-0.375948	4.1039	-0.746067	1.27841	-0.489291	0.939691	0.417484	1.4619	0.902127	0.576022	0.671616
betaTub85D	FBgn0003889	1.86396	1.34941	2.37851	-1.9482	-0.0781377	-2.21993	0.0988217	0.0894496	0.108194	0.10633	0.113683	0.0907675
CG43254	FBgn0262899	1.86235	0.0244122	3.70029	-0.695733	1.01384	-0.654002	#N/A	#N/A	#N/A	#N/A	#N/A	#N/A
to	FBgn0039298	1.86087	2.30735	1.41438	0.0756307	0.00786728	-0.0887552	-0.226455	0.216392	-0.669302	#DIV/0!	#DIV/0!	#DIV/0!
Hsp60C	FBgn0031728	1.85411	1.40067	2.30756	-2.5576	-0.108861	-2.45907	-0.102808	-0.134509	-0.0711068	0.0418506	0.0894772	0.00849454
CG4836	FBgn0038762	1.85289	1.44105	2.26472	-1.34962	-0.0318126	-1.88218	#N/A	#N/A	#N/A	#N/A	#N/A	#N/A
Acp53C14a	FBgn0034152	1.84771	-0.790702	4.48612	-1.10108	1.19266	-0.43642	1.00681	0.496965	1.51665	0.410779	0.320459	0.360693
CG2267	FBgn0039792	1.8426	1.3326	2.3526	-2.08561	-0.25718	-3.06376	#N/A	#N/A	#N/A	#N/A	#N/A	#N/A
Mst84Dd	FBgn0004175	1.83132	1.49803	2.16462	-2.29332	-0.0169759	-2.15965	#N/A	#N/A	#N/A	#N/A	#N/A	#N/A
Cyp12d1-d	FBgn0053503	1.81945	1.25247	2.38643	-0.310269	-0.163443	-0.0619665	1.88297	1.27063	2.49531	-0.0834664	-0.0463285	0.0560061
CG1288	FBgn0250845	1.80993	1.30399	2.31587	-2.92632	-0.195132	-2.68768	#N/A	#N/A	#N/A	#N/A	#N/A	#N/A
CG8701	FBgn0033287	1.80845	1.35599	2.26091	-2.05612	0.0577142	-2.43928	#N/A	#N/A	#N/A	#N/A	#N/A	#N/A
scpr-B	FBgn0037888	1.80774	1.2127	2.40278	0.716674	-0.369336	-2.14148	0.255197	0.280531	0.229862	#DIV/0!	-0.0905166	0.0449919
CG31820	FBgn0051820	1.80604	1.48825	2.12383	-2.75185	-0.0131876	-2.3226	#N/A	#N/A	#N/A	#N/A	#N/A	#N/A
CG3640	FBgn0035042	1.79602	0.133711	3.45834	-0.521216	1.21627	-0.555008	0.67322	0.452625	0.893815	#DIV/0!	#DIV/0!	#DIV/0!
CG12853	FBgn0040747	1.7958	1.59894	1.99266	-1.06284	-0.253834	-1.85303	#N/A	#N/A	#N/A	#N/A	#N/A	#N/A
CG5538	FBgn0038052	1.79535	1.26973	2.32096	-0.170009	-0.0917996	-1.53516	#N/A	#N/A	#N/A	#N/A	#N/A	#N/A
S-Lap3	FBgn0045770	1.79389	1.28272	2.30507	-2.29154	-0.0723088	-2.67923	1.23986	1.20994	1.26979	#DIV/0!	#DIV/0!	#DIV/0!
Akh	FBgn0004552	1.79364	2.63922	0.948071	0.791191	-0.164152	0.701132	0.19176	0.303448	0.0800725	#DIV/0!	#DIV/0!	#DIV/0!
CG43272	FBgn0262961	1.78907	-0.0288487	3.607	-0.756211	0.948592	-0.722462	#N/A	#N/A	#N/A	#N/A	#N/A	#N/A
CG7046	FBgn0038979	1.78297	1.34574	2.22019	-1.07582	-0.274582	-2.22844	#N/A	#N/A	#N/A	#N/A	#N/A	#N/A
CG12907	FBgn0250840	1.78018	1.33673	2.22363	-2.44796	-0.119047	-2.42718	#N/A	#N/A	#N/A	#N/A	#N/A	#N/A
CG6628	FBgn0036072	1.77883	1.30785	2.2498	-2.6531	-0.397701	-3.0701	1.0983	0.815663	1.38093	#DIV/0!	#DIV/0!	#DIV/0!
CG6304	FBgn0032624	1.77417	1.40182	2.14652	-1.41753	-0.504062	-3.12609	#N/A	#N/A	#N/A	#N/A	#N/A	#N/A
Mst33A	FBgn0028412	1.77339	1.34494	2.20184	-2.16435	-0.28043	-2.91039	#N/A	#N/A	#N/A	#N/A	#N/A	#N/A
Sfp65A	FBgn0259969	1.77295	-0.0377024	3.5836	-1.32519	0.880436	-0.770463	0.308291	0.0933051	0.523277	0.369273	0.349258	0.698347
janB	FBgn0001281	1.77063	1.42995	2.1113	-0.960757	-0.185907	-2.58712	#N/A	#N/A	#N/A	#N/A	#N/A	#N/A
Acp26Ab	FBgn0002856	1.76893	-0.346456	3.88432	-0.146896	1.82259	-0.145619	0.474162	0.0857506	0.862572	1.23989	1.11236	0.91724
Cyt-c-d	FBgn0086907	1.76892	1.46369	2.07415	-0.281106	-0.585235	-2.71215	0.0546876	0.21934	-0.109965	-0.734239	-0.600739	-0.29711
CG10407	FBgn0038395	1.76776	1.30042	2.2351	-0.24367	0.0829823	-0.530153	0.40691	-0.0669152	0.880736	2.72258	1.08745	0.141286
CG33340	FBgn0053340	1.76713	1.31737	2.21689	-2.74903	-0.0280528	-2.23467	1.43034	1.30459	1.55608	#DIV/0!	#DIV/0!	#DIV/0!
Spn3	FBgn0028986	1.76568	-0.329964	3.86132	-0.735682	0.876722	-0.782961	0.515685	-0.371686	1.40306	0.743631	0.444459	0.416215
CG10734	FBgn0034082	1.76202	1.28492	2.23912	-1.55223	-0.232257	-2.45453	#N/A	#N/A	#N/A	#N/A	#N/A	#N/A
CG15306	FBgn0030191	1.75761	1.29685	2.21837	-0.516323	-0.400365	-2.346	#N/A	#N/A	#N/A	#N/A	#N/A	#N/A
CG11037	FBgn0037038	1.75656	-0.112592	3.62572	-1.09236	0.968196	-0.764303	0.964736	0.442884	1.48659	0.587761	0.326077	-0.0592119
CG43278	FBgn0262967	1.75655	1.4245	2.08861	-0.230878	-0.913738	-2.5539	#N/A	#N/A	#N/A	#N/A	#N/A	#N/A
CG9920	FBgn0038200	1.74683	1.42458	2.06907	-0.16816	-0.217604	-1.23351	-0.163047	0.077388	-0.403483	-0.293753	-1.54079	-1.09187
Acp62F	FBgn0020509	1.74502	-0.384231	3.87426	-0.83757	0.74251	-0.730306	0.777996	0.265551	1.29044	0.681717	0.270921	0.277012
CG17097	FBgn0032275	1.74496	-0.879717	4.36963	-1.23102	1.28623	-0.563112	#N/A	#N/A	#N/A	#N/A	#N/A	#N/A
tomboy20	FBgn0037828	1.74229	1.40263	2.08194	-1.96718	-0.352163	-2.66432	#N/A	#N/A	#N/A	#N/A	#N/A	#N/A
CG33284	FBgn0053284	1.73892	1.32181	2.15603	-2.45262	-0.20937	-2.77911	#N/A	#N/A	#N/A	#N/A	#N/A	#N/A
Mst98Ca	FBgn0002865	1.73829	1.32341	2.15317	-2.44318	0.029554	-2.46276	#N/A	#N/A	#N/A	#N/A	#N/A	#N/A
CG31226	FBgn0051226	1.7324	1.35169	2.11311	-1.96077	0.0516149	-1.98272	#N/A	#N/A	#N/A	#N/A	#N/A	#N/A
lectin-30A	FBgn0040097	1.73167	-0.189812	3.65316	-1.06917	1.01361	-0.590248	0.833489	0.36502	1.30196	0.687143	0.685224	0.929933
CG8517	FBgn0034472	1.7287	1.27549	2.18192	-1.90393	-0.048472	-2.3476	#N/A	#N/A	#N/A	#N/A	#N/A	#N/A
CG16704	FBgn0031558	1.72855	1.85099	1.60611	0.0344456	0.0577187	0.179219	2.51334	2.70649	2.32019	-0.177041	0.734194	1.07387
Try29F	FBgn0015316	1.72379	2.0563	1.39128	-0.68849	-0.144169	-0.365402	#N/A	#N/A	#N/A	#N/A	#N/A	#N/A
CheA86a	FBgn0261291	1.72277	1.81164	1.63389	-0.21216	0.178262	0.170419	#N/A	#N/A	#N/A	#N/A	#N/A	#N/A
scpr-C	FBgn0037879	1.72147	1.24274	2.20019	0.797415	-0.0140515	-0.880281	#N/A	#N/A	#N/A	#N/A	#N/A	#N/A
Sfp77F	FBgn0259972	1.71913	-0.111537	3.54979	-0.807243	1.08445	-0.69356	0.708925	0.326524	1.09133	1.36475	1.01963	1.11948
CG31788	FBgn0051788	1.71675	1.23735	2.19614	-1.79382	-0.136609	-1.8916	#N/A	#N/A	#N/A	#N/A	#N/A	#N/A
CG18302	FBgn0032266	1.71622	1.74654	1.68589	-0.758307	-0.194313	0.0253359	#N/A	#N/A	#N/A	#N/A	#N/A	#N/A
CG43638	FBgn0263647	1.71063	1.39803	2.02324	-2.38047	-0.189603	-2.58083	#N/A	#N/A	#N/A	#N/A	#N/A	#N/A
CG4669	FBgn0035598	1.70851	1.27795	2.13908	-2.11639	-0.161067	-3.00433	#N/A	#N/A	#N/A	#N/A	#N/A	#N/A
CG31418	FBgn0051418	1.70642	0.196407	3.21644	-0.470912	0.835893	-1.00265	1.2693	0.747082	1.79152	0.650065	0.35293	0.111352
CG3213	FBgn0031545	1.70488	1.21606	2.19371	-1.84575	0.0233191	-2.5874	#N/A	#N/A	#N/A	#N/A	#N/A	#N/A
Mst84Db	FBgn0004173	1.70484	1.49672	1.91297	-2.3899	0.0445569	-2.3395	#N/A	#N/A	#N/A	#N/A	#N/A	#N/A
CG32141	FBgn0052141	1.70421	1.26439	2.14402	-0.732182	-0.104809	-2.4779	#N/A	#N/A	#N/A	#N/A	#N/A	#N/A
CG2127	FBgn0033286	1.7022	1.18632	2.21809	-2.37848	0.0581925	-2.55218	#N/A	#N/A	#N/A	#N/A	#N/A	#N/A
CG32240	FBgn0052240	1.70152	1.30656	2.09649	-1.70679	-0.256294	-2.68875	#N/A	#N/A	#N/A	#N/A	#N/A	#N/A
CG43147	FBgn0262623	1.69809	-1.35743	4.75362	-1.27758	1.0926	-0.522553	#N/A	#N/A	#N/A	#N/A	#N/A	#N/A
CR17567	FBgn0040994	1.69646	1.24039	2.15253	-2.41525	0.0647666	-2.08887	#N/A	#N/A	#N/A	#N/A	#N/A	#N/A
CG31639	FBgn0051639	1.69441	1.25049	2.13833	-2.08507	0.0107119	-2.24954	#N/A	#N/A	#N/A	#N/A	#N/A	#N/A
BG642163	FBgn0083938	1.69284	-0.292637	3.67832	-1.44464	1.039	-0.810683	0.714999	0.167275	1.26272	0.613186	0.400133	0.457031
Sfp35C	FBgn0259965	1.69257	-0.0194477	3.40459	-1.41523	0.9712	-0.774219	1.29371	0.784236	1.80318	0.521353	0.414292	0.11419
S-Lap2	FBgn0052351	1.69069	1.19815	2.18324	-1.17011	-0.0499433	-2.13969	0.949592	1.05613	0.843059	#DIV/0!	#DIV/0!	#DIV/0!
Obp22a	FBgn0043539	1.69011	0.0909184	3.2893	-0.559424	0.787947	-0.78511	1.32167	0.894361	1.74898	-0.235197	-0.427194	-0.541396
CR32658	FBgn0040859	1.68849	1.32432	2.05265	-0.913676	-0.144491	-1.49158	#N/A	#N/A	#N/A	#N/A	#N/A	#N/A
CR42767	FBgn0261835	1.68703	1.29024	2.08382	0.644717	-0.384957	-1.84731	#N/A	#N/A	#N/A	#N/A	#N/A	#N/A
CG43057	FBgn0262359	1.6868	0.145748	3.22785	-0.827804	0.467786	-0.928853	0.595016	0.0400839	1.14995	0.447124	0.557101	0.535591
LysE	FBgn0004428	1.68617	1.59385	1.77849	-1.86337	-0.347677	-0.275339	#N/A	#N/A	#N/A	#N/A	#N/A	#N/A
dj	FBgn0019828	1.68523	1.22965	2.14081	-2.75706	-0.14031	-2.30399	#N/A	#N/A	#N/A	#N/A	#N/A	#N/A
CR9284	FBgn0046297	1.68213	1.27822	2.08604	-2.43484	-0.0347004	-2.74186	#N/A	#N/A	#N/A	#N/A	#N/A	#N/A
CG12860	FBgn0033954	1.67516	1.24391	2.10642	-2.01456	0.0856168	-2.32771	#N/A	#N/A	#N/A	#N/A	#N/A	#N/A
CG14061	FBgn0039598	1.67513	-0.0144602	3.36473	-0.740925	1.14319	-0.832068	0.924261	0.420521	1.428	0.618931	0.0288683	-0.136194
Mst35Ba	FBgn0013300	1.67502	1.31822	2.03183	-1.83946	-0.166327	-2.75584	#N/A	#N/A	#N/A	#N/A	#N/A	#N/A
CG10725	FBgn0036362	1.67194	3.01872	0.325157	0.63185	-0.0104097	1.08287	#N/A	#N/A	#N/A	#N/A	#N/A	#N/A
Mal-B1	FBgn0032381	1.67086	1.56193	1.77978	0.206461	0.146199	0.140061	1.43848	1.54477	1.33219	2.82443	0.534111	-0.35494
CG3330	FBgn0039511	1.67031	1.23146	2.10915	-2.53334	-0.0773634	-2.38648	#N/A	#N/A	#N/A	#N/A	#N/A	#N/A
Hsp60B	FBgn0011244	1.66901	1.17216	2.16586	-2.47266	-0.109207	-2.89835	0.493978	0.736004	0.251953	#DIV/0!	#DIV/0!	#DIV/0!
Tim17b2	FBgn0020371	1.66616	1.22349	2.10883	-1.83763	-0.17781	-2.94795	#N/A	#N/A	#N/A	#N/A	#N/A	#N/A
CG14658	FBgn0037283	1.66528	1.40755	1.923	-1.7518	-0.474554	-2.40963	#N/A	#N/A	#N/A	#N/A	#N/A	#N/A
CG14297	FBgn0038655	1.66278	1.29075	2.0348	-0.663218	-0.209159	-2.60529	#N/A	#N/A	#N/A	#N/A	#N/A	#N/A
CG10396	FBgn0033020	1.66184	1.31921	2.00446	-0.886874	-0.346927	-1.61063	#N/A	#N/A	#N/A	#N/A	#N/A	#N/A
CG17472	FBgn0032868	1.66046	-0.104437	3.42536	-0.404761	0.936842	-0.63712	0.435093	-0.208923	1.07911	0.606499	0.428358	0.340534
soti	FBgn0038225	1.66034	1.22185	2.09883	-0.828846	-0.460308	-2.86267	#N/A	#N/A	#N/A	#N/A	#N/A	#N/A
CG5968	FBgn0032588	1.65927	1.23549	2.08304	-1.5701	-0.192941	-2.64845	#N/A	#N/A	#N/A	#N/A	#N/A	#N/A
CG10252	FBgn0039104	1.65819	1.29435	2.02203	-2.03674	0.0820305	-2.16408	1.36988	1.07872	1.66104	#DIV/0!	#DIV/0!	#DIV/0!
Pglym87	FBgn0011270	1.65595	1.355	1.95691	-2.50159	-0.072907	-2.81799	-0.256769	-0.219365	-0.294174	-0.157859	-0.373777	-0.200105
spaw	FBgn0050365	1.65582	1.16751	2.14412	-2.32224	-0.11499	-3.09954	#N/A	#N/A	#N/A	#N/A	#N/A	#N/A
CG9016	FBgn0031751	1.65569	1.16692	2.14446	-1.76482	0.119028	-2.14072	#N/A	#N/A	#N/A	#N/A	#N/A	#N/A
CG6149	FBgn0036158	1.65527	0.379239	2.9313	0.0906226	1.10146	-0.554302	#N/A	#N/A	#N/A	#N/A	#N/A	#N/A
CG31740	FBgn0051740	1.65445	1.28616	2.02274	-2.66258	0.0710034	-1.96754	#N/A	#N/A	#N/A	#N/A	#N/A	#N/A
CR43239	FBgn0262884	1.65282	-0.0471908	3.35283	-1.15039	0.736543	-1.12046	#N/A	#N/A	#N/A	#N/A	#N/A	#N/A
CG13898	FBgn0035161	1.65085	1.24297	2.05872	-1.20775	-0.175375	-2.79058	#N/A	#N/A	#N/A	#N/A	#N/A	#N/A
CG42659	FBgn0261531	1.64897	1.17519	2.12276	-1.71971	-0.331191	-2.78752	#N/A	#N/A	#N/A	#N/A	#N/A	#N/A
CG43755	FBgn0264086	1.64628	1.17472	2.11785	-0.935425	-0.121209	-2.72351	#N/A	#N/A	#N/A	#N/A	#N/A	#N/A
CG31870	FBgn0051870	1.64553	1.33646	1.95459	-1.67962	-0.157511	-3.10523	#N/A	#N/A	#N/A	#N/A	#N/A	#N/A
Acp98AB	FBgn0263597	1.64482	-0.74058	4.03022	-0.619709	0.72368	-0.58716	#N/A	#N/A	#N/A	#N/A	#N/A	#N/A
CG42853	FBgn0262100	1.64421	1.30542	1.98301	-1.15675	-0.399675	-2.94574	#N/A	#N/A	#N/A	#N/A	#N/A	#N/A
Atg8b	FBgn0038539	1.6434	1.28779	1.999	-1.54702	-0.61009	-2.89883	#N/A	#N/A	#N/A	#N/A	#N/A	#N/A
msopa	FBgn0004414	1.64162	0.00871002	3.27452	-0.00214282	1.16966	-1.13927	#N/A	#N/A	#N/A	#N/A	#N/A	#N/A
Acp29AB	FBgn0015583	1.64127	0.148346	3.13419	-0.430733	1.19442	-0.807849	0.918619	0.220395	1.61684	0.834864	0.291349	0.322941
CG3517	FBgn0038706	1.64107	1.19732	2.08481	-2.83063	-0.222575	-3.05022	#N/A	#N/A	#N/A	#N/A	#N/A	#N/A
CG31050	FBgn0051050	1.6405	1.36195	1.91904	-0.715329	-0.43654	-2.77491	#N/A	#N/A	#N/A	#N/A	#N/A	#N/A
Ppi1	FBgn0051025	1.63904	1.07903	2.19905	-1.54936	-0.0762843	-2.03476	#N/A	#N/A	#N/A	#N/A	#N/A	#N/A
CG7131	FBgn0038598	1.63434	1.15099	2.1177	-0.239645	-0.167137	-2.03947	#N/A	#N/A	#N/A	#N/A	#N/A	#N/A
S-Lap7	FBgn0033868	1.63324	1.16445	2.10203	-1.99796	0.0406296	-2.14862	1.3558	1.23605	1.47555	#DIV/0!	#DIV/0!	#DIV/0!
ocn	FBgn0041102	1.63255	1.1905	2.0746	-1.96967	-0.130628	-2.22385	1.62195	1.45128	1.79262	#DIV/0!	#DIV/0!	#DIV/0!
CG17377	FBgn0031859	1.63107	1.22698	2.03515	-2.24873	0.0276801	-1.679	#N/A	#N/A	#N/A	#N/A	#N/A	#N/A
Sfp33A3	FBgn0259964	1.62945	-0.221628	3.48053	0.446575	0.795812	-0.448914	0.764951	0.166324	1.36358	0.906518	0.607144	0.670217
CG34241	FBgn0250825	1.62926	1.17869	2.07982	-1.55771	-0.191311	-0.920585	#N/A	#N/A	#N/A	#N/A	#N/A	#N/A
Sfp96F	FBgn0261061	1.62656	-0.0367554	3.28987	-0.583824	0.41676	-1.07208	#DIV/0!	#DIV/0!	#DIV/0!	#DIV/0!	#DIV/0!	#DIV/0!
CG30376	FBgn0050376	1.62652	1.13154	2.1215	-2.53255	-0.0204471	-2.44268	#N/A	#N/A	#N/A	#N/A	#N/A	#N/A
Sfp70A4	FBgn0259970	1.62598	-0.173598	3.42555	-0.587167	0.65555	-1.07309	0.695722	0.181795	1.20965	0.446142	0.257465	0.443254
Sfp51E	FBgn0259966	1.62354	-0.0813203	3.3284	-1.23307	1.00182	-0.643881	1.04453	0.53892	1.55015	0.670686	0.678852	0.37627
robl62A	FBgn0028567	1.62092	1.17291	2.06893	-1.68792	-0.315176	-2.32634	#N/A	#N/A	#N/A	#N/A	#N/A	#N/A
CG18449	FBgn0033285	1.62072	1.23441	2.00702	-2.24715	-0.0484243	-2.33013	#N/A	#N/A	#N/A	#N/A	#N/A	#N/A
CG30039	FBgn0050039	1.61816	1.24157	1.99475	-2.68346	-0.270101	-2.22886	#N/A	#N/A	#N/A	#N/A	#N/A	#N/A
CG3124	FBgn0034840	1.61806	1.11003	2.12609	-1.82252	0.0391663	-2.51669	#N/A	#N/A	#N/A	#N/A	#N/A	#N/A
CG31802	FBgn0051802	1.61584	1.10871	2.12297	-1.16336	-0.43324	-3.17129	#N/A	#N/A	#N/A	#N/A	#N/A	#N/A
CG42355	FBgn0259701	1.61501	1.31184	1.91818	0.504399	-0.332357	-2.60739	#N/A	#N/A	#N/A	#N/A	#N/A	#N/A
CG6380	FBgn0032632	1.60628	1.18298	2.02957	-2.51312	-0.41661	-3.27145	#N/A	#N/A	#N/A	#N/A	#N/A	#N/A
CG31680	FBgn0051680	1.60602	-0.101016	3.31305	-0.274567	1.36755	-0.697533	0.90801	0.354772	1.46125	1.12914	0.738195	0.847556
CG32457	FBgn0052457	1.60588	1.10731	2.10446	-2.64938	-0.680633	-3.68796	#N/A	#N/A	#N/A	#N/A	#N/A	#N/A
S-Lap8	FBgn0034132	1.60468	1.11742	2.09194	-1.86836	-0.030923	-2.23843	1.76271	1.70349	1.82192	#DIV/0!	#DIV/0!	#DIV/0!
Obp44a	FBgn0033268	1.60211	1.29203	1.91219	-0.226151	-0.178227	-0.32378	0.90337	0.960499	0.84624	-0.58898	0.0177297	-0.0914676
CG8840	FBgn0031531	1.60092	1.287	1.91483	-0.956526	-0.490211	-2.35566	#N/A	#N/A	#N/A	#N/A	#N/A	#N/A
CG4286	FBgn0034601	1.59999	1.26887	1.93111	-1.69948	-0.146988	-2.93707	#N/A	#N/A	#N/A	#N/A	#N/A	#N/A
CG9314	FBgn0032061	1.59549	1.32659	1.86438	-0.714097	-0.335641	-2.16454	0.916078	0.863555	0.968601	0.0588247	-0.143285	0.0251727
CG5614	FBgn0038359	1.59548	1.17825	2.01271	-2.43304	-0.174795	-2.94412	#N/A	#N/A	#N/A	#N/A	#N/A	#N/A
CG30395	FBgn0050395	1.59448	-0.0347433	3.22371	-1.24608	0.866285	-0.83276	1.38774	0.834215	1.94127	0.895687	-0.126971	-0.218991
CG34051	FBgn0054051	1.59305	-0.178445	3.36455	0.186345	1.29327	-0.432908	0.990041	0.50301	1.47707	1.12825	0.670827	0.763522
CG31644	FBgn0051644	1.58935	1.1645	2.01419	-1.57995	-0.373402	-2.52036	#N/A	#N/A	#N/A	#N/A	#N/A	#N/A
CG32652	FBgn0052652	1.58549	1.09668	2.07431	-2.46702	0.0351617	-2.22892	#N/A	#N/A	#N/A	#N/A	#N/A	#N/A
w-cup	FBgn0032269	1.58428	1.03734	2.13122	-2.89441	-0.0437239	-2.80752	#DIV/0!	#DIV/0!	#DIV/0!	#DIV/0!	#DIV/0!	#DIV/0!
CG14718	FBgn0037939	1.58187	1.07957	2.08417	-2.51018	-0.154829	-2.68628	#N/A	#N/A	#N/A	#N/A	#N/A	#N/A
CG3982	FBgn0035988	1.58072	1.15246	2.00898	-0.972539	-0.18727	-1.7067	#N/A	#N/A	#N/A	#N/A	#N/A	#N/A
S-Lap1	FBgn0035915	1.58002	1.06965	2.09039	-1.36096	0.0725896	-1.81811	1.25443	1.27338	1.23549	#DIV/0!	#DIV/0!	#DIV/0!
CG10859	FBgn0032520	1.57799	1.17179	1.98418	-1.7089	-0.249808	-2.3345	#N/A	#N/A	#N/A	#N/A	#N/A	#N/A
CG32192	FBgn0052192	1.57669	1.25998	1.8934	-1.57929	-0.224095	-2.07313	#N/A	#N/A	#N/A	#N/A	#N/A	#N/A
CG17376	FBgn0042189	1.57666	1.16038	1.99293	-1.70284	0.0760588	-1.62073	#N/A	#N/A	#N/A	#N/A	#N/A	#N/A
CG32436	FBgn0052436	1.57637	1.14536	2.00738	-1.41208	-0.191726	-2.41142	#N/A	#N/A	#N/A	#N/A	#N/A	#N/A
CG15434	FBgn0040705	1.57266	1.54323	1.60208	-1.99312	-0.373515	-0.142092	3.19335	3.09215	3.29454	0.0745046	-0.0482338	-0.143603
Mst84Dc	FBgn0004174	1.57195	1.24118	1.90271	-2.01083	-0.000570371	-2.21335	#N/A	#N/A	#N/A	#N/A	#N/A	#N/A
Mst98Cb	FBgn0004171	1.57163	1.12687	2.01638	-1.99273	-0.18587	-2.75374	#N/A	#N/A	#N/A	#N/A	#N/A	#N/A
eIF4E-5	FBgn0035823	1.57155	1.17479	1.96832	-2.17338	-0.16723	-2.777	#N/A	#N/A	#N/A	#N/A	#N/A	#N/A
CG17217	FBgn0032419	1.57116	0.588183	2.55414	0.750469	-0.224548	-0.491888	#N/A	#N/A	#N/A	#N/A	#N/A	#N/A
S-Lap4	FBgn0052064	1.56951	1.02962	2.10939	-2.38733	0.0687993	-2.25378	0.784836	0.750159	0.819514	#DIV/0!	#DIV/0!	#DIV/0!
CG11327	FBgn0031849	1.56874	1.11504	2.02244	-0.92332	-0.329491	-2.67928	#N/A	#N/A	#N/A	#N/A	#N/A	#N/A
Mst87F	FBgn0002862	1.56766	1.26345	1.87187	-1.58551	-0.0131546	-1.95994	#N/A	#N/A	#N/A	#N/A	#N/A	#N/A
CR43994	FBgn0264726	1.56363	0.149303	2.97795	-1.63965	0.442487	-0.75239	#N/A	#N/A	#N/A	#N/A	#N/A	#N/A
CG31909	FBgn0051909	1.56318	1.29019	1.83616	-0.15258	-0.812884	-1.77485	#N/A	#N/A	#N/A	#N/A	#N/A	#N/A
CG5089	FBgn0034144	1.563	1.0974	2.0286	-1.17659	0.00154219	-2.11297	-0.0159922	-0.168037	0.136053	#DIV/0!	#DIV/0!	#DIV/0!
CG16782	FBgn0029659	1.56272	1.18396	1.94148	-1.44651	-0.184552	-2.92057	#N/A	#N/A	#N/A	#N/A	#N/A	#N/A
CG16894	FBgn0034483	1.56204	1.20494	1.91914	-2.17456	-0.31182	-3.27522	#N/A	#N/A	#N/A	#N/A	#N/A	#N/A
Spn2	FBgn0028987	1.55922	-0.442441	3.56088	-1.16591	0.0893904	-0.993474	0.773744	0.0720071	1.47548	0.522848	-0.239449	0.00235075
CG4983	FBgn0032371	1.55836	1.13246	1.98427	-1.89482	-0.223268	-3.51954	#N/A	#N/A	#N/A	#N/A	#N/A	#N/A
CG4691	FBgn0028870	1.55814	1.09095	2.02534	-2.17267	-0.16127	-2.80269	#N/A	#N/A	#N/A	#N/A	#N/A	#N/A
CG31709	FBgn0051709	1.55568	1.12585	1.98551	-2.21026	-0.224034	-2.71451	#N/A	#N/A	#N/A	#N/A	#N/A	#N/A
Cyp12d1-p	FBgn0050489	1.55478	1.24642	1.86314	-0.185552	-0.12535	-0.0651359	1.84589	1.25849	2.4333	#DIV/0!	#DIV/0!	#DIV/0!
CG14305	FBgn0038630	1.55327	1.16893	1.9376	-1.9828	-0.232651	-2.58097	-0.0390107	-0.0615731	-0.0164484	#DIV/0!	#DIV/0!	#DIV/0!
ran-like	FBgn0036497	1.55281	1.0824	2.02323	-2.42607	-0.477945	-3.399	#N/A	#N/A	#N/A	#N/A	#N/A	#N/A
CG34129	FBgn0083965	1.55164	0.172877	2.9304	-0.113262	1.47327	-0.856007	0.640706	0.301204	0.980207	#DIV/0!	-1.24109	-1.34094
CR32661	FBgn0030356	1.55124	1.1474	1.95509	-0.521104	-0.121957	-2.134	#N/A	#N/A	#N/A	#N/A	#N/A	#N/A
CG34107	FBgn0083943	1.55116	1.14465	1.95768	-0.712804	-0.313599	-2.02054	#N/A	#N/A	#N/A	#N/A	#N/A	#N/A
CG8565	FBgn0030697	1.55072	1.07503	2.02641	-0.940329	-0.209116	-3.016	#N/A	#N/A	#N/A	#N/A	#N/A	#N/A
djl	FBgn0037463	1.55065	1.17405	1.92726	-1.54018	-0.170624	-2.63782	#N/A	#N/A	#N/A	#N/A	#N/A	#N/A
CG4218	FBgn0250844	1.55009	1.17638	1.92379	-2.16716	-0.213638	-2.44189	#N/A	#N/A	#N/A	#N/A	#N/A	#N/A
CG12470	FBgn0040371	1.54711	1.05231	2.04191	-0.785713	-0.145851	-2.35709	#N/A	#N/A	#N/A	#N/A	#N/A	#N/A
CG9602	FBgn0038175	1.54563	1.28762	1.80365	-1.75659	-0.203734	-3.19056	#N/A	#N/A	#N/A	#N/A	#N/A	#N/A
CG8136	FBgn0037616	1.54421	1.2522	1.83622	-0.599357	-0.241986	-1.60913	#N/A	#N/A	#N/A	#N/A	#N/A	#N/A
CG14075	FBgn0036835	1.54396	2.11086	0.977055	1.03771	-0.0450567	0.723884	#N/A	#N/A	#N/A	#N/A	#N/A	#N/A
Sfp53D	FBgn0259967	1.54343	0.717897	2.36896	-0.721115	-0.146507	-0.656825	1.07609	0.687455	1.46473	1.12156	0.556185	0.604916
CG8564	FBgn0035776	1.54263	1.12223	1.96304	-1.89079	-0.187096	-2.9885	#N/A	#N/A	#N/A	#N/A	#N/A	#N/A
CG7768	FBgn0036415	1.5392	1.5865	1.4919	0.257653	-0.418377	-0.885698	-0.404053	-0.416224	-0.391881	0.133638	0.11335	0.256411
CG34033	FBgn0054033	1.5386	-0.0181917	3.09539	-0.504406	1.44693	-0.746868	1.27284	0.579504	1.96619	0.612202	-0.0127357	-0.564892
CG32371	FBgn0052371	1.53545	1.13147	1.93944	-1.57959	-0.0282822	-2.31268	#N/A	#N/A	#N/A	#N/A	#N/A	#N/A
CG5790	FBgn0032677	1.53537	1.13491	1.93583	-2.2155	-0.412949	-3.092	#N/A	#N/A	#N/A	#N/A	#N/A	#N/A
CG9254	FBgn0028513	1.53528	1.05125	2.01932	-2.09099	-0.225066	-3.10919	#N/A	#N/A	#N/A	#N/A	#N/A	#N/A
CG14034	FBgn0250847	1.5344	-0.182638	3.25143	-0.831803	0.687764	-0.822258	1.23031	0.762417	1.69821	0.782738	0.501255	0.506041
CG12699	FBgn0046294	1.53424	1.10694	1.96155	-1.70309	0.0412368	-1.66401	#N/A	#N/A	#N/A	#N/A	#N/A	#N/A
CG34168	FBgn0085197	1.53364	1.1668	1.90049	-2.08106	0.0543063	-1.98643	#N/A	#N/A	#N/A	#N/A	#N/A	#N/A
CG12689	FBgn0029952	1.53351	1.06843	1.99859	-1.3205	-0.477415	-3.32826	#N/A	#N/A	#N/A	#N/A	#N/A	#N/A
CG1999	FBgn0029947	1.53273	1.08711	1.97835	-1.77578	-0.228514	-2.80477	#N/A	#N/A	#N/A	#N/A	#N/A	#N/A
CG15200	FBgn0030278	1.53238	1.04203	2.02273	-1.34234	-0.0394504	-2.65576	#N/A	#N/A	#N/A	#N/A	#N/A	#N/A
TrxT	FBgn0029752	1.5318	1.06358	2.00001	0.899264	-0.0389435	-1.16364	0.760341	1.13079	0.389896	#DIV/0!	#DIV/0!	#DIV/0!
CG43111	FBgn0262571	1.53137	0.0608494	3.00188	-0.190576	0.897327	-0.868816	#N/A	#N/A	#N/A	#N/A	#N/A	#N/A
CG4546	FBgn0038373	1.53101	1.164	1.89802	-0.6798	-0.23702	-1.29603	1.47248	1.33288	1.61208	0.849777	0.0303998	0.262458
CG13747	FBgn0033364	1.5296	1.11769	1.94152	-1.51712	-0.256957	-3.31022	#N/A	#N/A	#N/A	#N/A	#N/A	#N/A
CG30430	FBgn0050430	1.52817	1.19239	1.86395	-2.55385	-0.0738751	-2.56759	#N/A	#N/A	#N/A	#N/A	#N/A	#N/A
Hsp60D	FBgn0032525	1.52771	1.227	1.82843	-0.937661	-0.5001	-3.68579	#N/A	#N/A	#N/A	#N/A	#N/A	#N/A
CG14355	FBgn0038208	1.52531	0.987635	2.06299	-2.44358	-0.116939	-2.81405	#N/A	#N/A	#N/A	#N/A	#N/A	#N/A
Sfp78E	FBgn0261059	1.52462	0.163522	2.88572	-0.381433	0.900858	-0.800514	1.11598	0.593334	1.63862	1.17385	0.787586	0.675754
CG9975	FBgn0034435	1.52343	1.17689	1.86997	-1.26242	-0.174119	-2.82456	#N/A	#N/A	#N/A	#N/A	#N/A	#N/A
CG6255	FBgn0038708	1.52297	1.21997	1.82598	-0.862609	-0.155441	-2.40917	0.660756	0.645086	0.676426	-0.186778	-0.666287	-0.668584
CG5693	FBgn0040989	1.52227	1.38154	1.66301	-1.77386	-0.663304	-4.02196	#N/A	#N/A	#N/A	#N/A	#N/A	#N/A
CG30378	FBgn0050378	1.5209	1.16325	1.87855	-1.20517	-0.357878	-3.30048	#DIV/0!	#DIV/0!	#DIV/0!	#DIV/0!	#DIV/0!	#DIV/0!
CG15635	FBgn0031617	1.518	-0.0319084	3.06791	-1.23277	1.44899	-1.01282	1.12241	0.626315	1.6185	0.517158	0.541182	0.286365
CG4434	FBgn0039071	1.51711	1.01714	2.01708	-1.29256	-0.235128	-3.00029	1.57825	1.43481	1.7217	0.413546	-0.279877	0.0729662
Tpl94D	FBgn0051281	1.5167	1.07063	1.96278	-1.66707	-0.31671	-2.83432	#N/A	#N/A	#N/A	#N/A	#N/A	#N/A
CG5217	FBgn0038694	1.51591	1.07021	1.96162	-2.04337	-0.270769	-2.96242	#N/A	#N/A	#N/A	#N/A	#N/A	#N/A
CG14739	FBgn0037987	1.5152	1.27842	1.75197	-2.30832	-0.430031	-2.97119	#N/A	#N/A	#N/A	#N/A	#N/A	#N/A
CG42789	FBgn0261860	1.51468	-0.115465	3.14483	-0.32685	1.61619	-0.35099	#N/A	#N/A	#N/A	#N/A	#N/A	#N/A
CG11373	FBgn0040679	1.51455	1.06785	1.96125	-1.20036	-0.0806821	-3.24211	#N/A	#N/A	#N/A	#N/A	#N/A	#N/A
CG6652	FBgn0036687	1.5136	1.00467	2.02254	-0.605715	-0.216181	-2.1894	#N/A	#N/A	#N/A	#N/A	#N/A	#N/A
Porin2	FBgn0069354	1.51254	1.459	1.56609	-1.60106	-0.611176	-2.11735	1.39318	1.07531	1.71105	0.0816194	-0.313974	-0.52738
CG15425	FBgn0031591	1.51134	1.18733	1.83535	-1.32823	-0.331579	-2.77126	#N/A	#N/A	#N/A	#N/A	#N/A	#N/A
CG5762	FBgn0039190	1.51134	1.05337	1.9693	-2.04677	-0.0659231	-2.73207	#N/A	#N/A	#N/A	#N/A	#N/A	#N/A
CG42733	FBgn0261686	1.51128	1.06288	1.95968	-2.02173	-0.161557	-3.28187	#N/A	#N/A	#N/A	#N/A	#N/A	#N/A
CG31178	FBgn0064912	1.51065	1.09855	1.92274	-0.894673	-0.234685	-1.85096	#N/A	#N/A	#N/A	#N/A	#N/A	#N/A
CG31206	FBgn0051206	1.50965	1.15467	1.86462	-2.03393	-0.336226	-2.38221	#N/A	#N/A	#N/A	#N/A	#N/A	#N/A
CG8526	FBgn0037759	1.50903	1.0882	1.92986	-0.389692	-0.246718	-1.72626	#N/A	#N/A	#N/A	#N/A	#N/A	#N/A
CG42688	FBgn0261578	1.50805	1.11131	1.90479	-2.75933	-0.00402718	-2.53387	#N/A	#N/A	#N/A	#N/A	#N/A	#N/A
CG34161	FBgn0085190	1.5074	1.20721	1.80758	-1.61031	-0.450273	-2.98813	#N/A	#N/A	#N/A	#N/A	#N/A	#N/A
CG14540	FBgn0039398	1.50662	1.08605	1.9272	-2.32716	-0.279115	-2.97529	#N/A	#N/A	#N/A	#N/A	#N/A	#N/A
sinah	FBgn0259794	1.50648	1.10414	1.90882	-1.97431	-0.261659	-2.99063	#N/A	#N/A	#N/A	#N/A	#N/A	#N/A
CG14168	FBgn0036044	1.50576	0.88624	2.12529	-0.49152	-1.66855	-2.12658	-0.181397	-0.135566	-0.227227	-0.0771891	-0.142118	-0.00678238
CG5539	FBgn0034907	1.50213	1.17889	1.82537	-0.619859	-0.276504	-2.21854	#N/A	#N/A	#N/A	#N/A	#N/A	#N/A
CG32445	FBgn0052445	1.50002	1.1343	1.86575	-2.48714	-0.191431	-3.14121	1.30652	1.03217	1.58088	#DIV/0!	#DIV/0!	#DIV/0!
CG1394	FBgn0030277	1.49921	1.1166	1.88183	-1.62996	-0.143417	-2.43099	#N/A	#N/A	#N/A	#N/A	#N/A	#N/A
CG3345	FBgn0031240	1.49895	1.07622	1.92169	-0.661464	-0.195888	-2.31987	#N/A	#N/A	#N/A	#N/A	#N/A	#N/A
Grx-1	FBgn0034658	1.49487	1.09251	1.89723	-1.7481	-0.355895	-2.67423	#N/A	#N/A	#N/A	#N/A	#N/A	#N/A
CG3494	FBgn0035008	1.49268	1.03925	1.9461	-1.36638	-0.32376	-3.03525	#N/A	#N/A	#N/A	#N/A	#N/A	#N/A
CG31419	FBgn0051419	1.48863	0.298623	2.67863	-0.730069	0.885505	-0.904569	1.18469	0.768769	1.6006	0.795715	0.214974	0.226463
CG9389	FBgn0037064	1.48326	1.13657	1.82995	-1.46499	-0.186444	-2.59831	#N/A	#N/A	#N/A	#N/A	#N/A	#N/A
CG9010	FBgn0034173	1.4817	1.07965	1.88376	-2.62349	-0.363775	-3.02009	-0.0337821	-0.000243735	-0.0673204	#DIV/0!	#DIV/0!	#DIV/0!
CG30093	FBgn0050093	1.48139	1.40732	1.55546	-1.19207	-0.531142	-2.06314	#N/A	#N/A	#N/A	#N/A	#N/A	#N/A
CG34002	FBgn0054002	1.47923	-0.0119798	2.97044	0.778649	1.50896	-0.422087	1.01996	0.589833	1.45008	0.372036	-0.0614451	-0.94039
eIF4E-4	FBgn0035709	1.47831	1.06031	1.8963	-2.59151	-0.231297	-2.92488	#N/A	#N/A	#N/A	#N/A	#N/A	#N/A
Cdlc2	FBgn0026141	1.47757	0.976056	1.97909	-2.87766	-0.303423	-3.04934	0.0554763	0.0599511	0.0510014	0.117452	-0.0624446	-0.038197
CG7251	FBgn0031723	1.47527	1.08136	1.86918	-2.65448	-0.158333	-3.04128	#N/A	#N/A	#N/A	#N/A	#N/A	#N/A
Pen	FBgn0011823	1.47519	1.0995	1.85088	-0.565878	-0.117564	-1.21197	#N/A	#N/A	#N/A	#N/A	#N/A	#N/A
CG9997	FBgn0039597	1.47486	0.0620374	2.88767	0.0225188	1.31362	-0.716328	1.13708	0.595046	1.67911	1.19774	0.534394	0.493302
CG15116	FBgn0034415	1.47442	-0.0499355	2.99877	-0.80992	1.12752	-0.695275	#N/A	#N/A	#N/A	#N/A	#N/A	#N/A
CG42820	FBgn0262002	1.47174	1.07567	1.8678	-0.838136	-0.421318	-3.26202	#N/A	#N/A	#N/A	#N/A	#N/A	#N/A
CG10919	FBgn0037514	1.4702	1.0864	1.854	-1.49196	-0.318193	-2.85507	#N/A	#N/A	#N/A	#N/A	#N/A	#N/A
CG31538	FBgn0051538	1.46976	1.00157	1.93794	-0.157255	-0.104517	-1.0435	#N/A	#N/A	#N/A	#N/A	#N/A	#N/A
CG11714	FBgn0036170	1.46768	1.15174	1.78361	-1.84455	-0.147696	-3.62891	#N/A	#N/A	#N/A	#N/A	#N/A	#N/A
CG7813	FBgn0034133	1.46456	0.9047	2.02441	-0.660156	-0.488438	-2.99854	#N/A	#N/A	#N/A	#N/A	#N/A	#N/A
CG17237	FBgn0031410	1.46401	1.01335	1.91468	-2.47	-0.246918	-3.23598	#N/A	#N/A	#N/A	#N/A	#N/A	#N/A
ymp	FBgn0261287	1.46264	1.06628	1.859	-0.906799	-0.349829	-2.33722	#N/A	#N/A	#N/A	#N/A	#N/A	#N/A
CG14926	FBgn0032360	1.46129	0.953561	1.96901	-2.65447	-0.0231215	-2.53459	#N/A	#N/A	#N/A	#N/A	#N/A	#N/A
CG13476	FBgn0036441	1.46108	1.1417	1.78046	-1.17069	-0.408733	-3.53065	#N/A	#N/A	#N/A	#N/A	#N/A	#N/A
CG18266	FBgn0031724	1.45904	0.959347	1.95874	-0.852102	-0.586696	-3.33679	#N/A	#N/A	#N/A	#N/A	#N/A	#N/A
CG15177	FBgn0037461	1.45592	1.05794	1.8539	-1.30884	-0.507062	-2.96599	#N/A	#N/A	#N/A	#N/A	#N/A	#N/A
CG31907	FBgn0051907	1.45589	1.00443	1.90735	-0.248504	-0.42277	-1.99387	#N/A	#N/A	#N/A	#N/A	#N/A	#N/A
CG11106	FBgn0030280	1.45474	1.08237	1.82712	-1.80799	-0.313806	-2.65024	#N/A	#N/A	#N/A	#N/A	#N/A	#N/A
Sfp33A1	FBgn0259962	1.45293	0.093983	2.81188	-0.942752	0.630113	-1.03012	#N/A	#N/A	#N/A	#N/A	#N/A	#N/A
hydra	FBgn0031128	1.45093	1.12943	1.77243	-1.27565	-0.345982	-2.79106	#N/A	#N/A	#N/A	#N/A	#N/A	#N/A
CG6262	FBgn0034121	1.45064	1.06975	1.83153	-2.49438	-0.120074	-3.35052	#N/A	#N/A	#N/A	#N/A	#N/A	#N/A
dro5	FBgn0035434	1.44836	1.40052	1.4962	-0.12538	-0.0361419	-0.0415348	1.60215	1.62996	1.57434	#DIV/0!	#DIV/0!	#DIV/0!
CG5024	FBgn0039373	1.44814	1.13155	1.76472	-0.652627	-0.550974	-2.9842	#N/A	#N/A	#N/A	#N/A	#N/A	#N/A
CR43157	FBgn0262687	1.44625	1.1558	1.7367	-0.227983	-0.341592	-2.24887	#N/A	#N/A	#N/A	#N/A	#N/A	#N/A
CG31988	FBgn0051988	1.44611	0.901888	1.99033	-1.78297	-0.0715756	-2.28509	#N/A	#N/A	#N/A	#N/A	#N/A	#N/A
CG18810	FBgn0042133	1.4438	1.09733	1.79028	0.849673	-0.555978	-1.73435	#N/A	#N/A	#N/A	#N/A	#N/A	#N/A
sut4	FBgn0028560	1.44299	0.99967	1.88631	-2.10433	-0.33892	-3.18356	1.39925	1.29723	1.50127	-0.307778	0.522613	0.0394832
CG13477	FBgn0036438	1.4394	1.0259	1.85291	-2.00735	-0.230087	-3.0282	#N/A	#N/A	#N/A	#N/A	#N/A	#N/A
Spn75F	FBgn0052203	1.43821	-0.13574	3.01217	-1.33219	1.27382	-0.788438	#DIV/0!	#DIV/0!	#DIV/0!	#DIV/0!	#DIV/0!	#DIV/0!
CG10841	FBgn0038163	1.4379	0.995304	1.8805	-0.979729	-0.259554	-2.94959	#N/A	#N/A	#N/A	#N/A	#N/A	#N/A
CG31287	FBgn0051287	1.4369	1.25719	1.61661	-0.635811	-0.546148	-1.88245	#N/A	#N/A	#N/A	#N/A	#N/A	#N/A
CG18335	FBgn0033610	1.43667	1.01152	1.86183	-0.862835	-0.302539	-1.70503	#N/A	#N/A	#N/A	#N/A	#N/A	#N/A
CycB	FBgn0000405	1.43292	2.04015	0.825688	0.124309	-1.28046	-1.07725	#N/A	#N/A	#N/A	#N/A	#N/A	#N/A
CG15208	FBgn0030247	1.42788	0.981384	1.87438	-1.11394	-0.342145	-2.80568	#N/A	#N/A	#N/A	#N/A	#N/A	#N/A
CG17349	FBgn0032771	1.42716	1.15248	1.70184	-1.93256	-0.218419	-3.14419	0.973825	1.12216	0.825489	#DIV/0!	#DIV/0!	#DIV/0!
CG6888	FBgn0036490	1.42598	1.07619	1.77577	-1.6761	-0.67942	-3.10475	0.970635	0.85286	1.08841	#DIV/0!	#DIV/0!	#DIV/0!
CG1324	FBgn0031129	1.41733	0.951474	1.88318	-2.34022	-0.1876	-2.41511	#N/A	#N/A	#N/A	#N/A	#N/A	#N/A
CG17261	FBgn0031501	1.41702	1.11394	1.7201	-0.861102	-0.104229	-1.688	#N/A	#N/A	#N/A	#N/A	#N/A	#N/A
CG42393	FBgn0259739	1.41652	1.02352	1.80952	-1.92833	-0.236263	-2.67295	#N/A	#N/A	#N/A	#N/A	#N/A	#N/A
CG5048	FBgn0036437	1.41601	1.07432	1.75771	-0.701273	-0.42294	-1.68698	#N/A	#N/A	#N/A	#N/A	#N/A	#N/A
CG6527	FBgn0036085	1.41214	1.00573	1.81855	-1.73947	-0.270125	-3.37903	#N/A	#N/A	#N/A	#N/A	#N/A	#N/A
CG30324	FBgn0050324	1.41202	0.962901	1.86113	-1.61963	-0.107571	-2.59055	#N/A	#N/A	#N/A	#N/A	#N/A	#N/A
CR32690	FBgn0052690	1.41098	1.01105	1.81091	-1.88212	-0.323718	-2.29169	#N/A	#N/A	#N/A	#N/A	#N/A	#N/A
CG16898	FBgn0034480	1.4098	1.37008	1.44952	-0.420284	-0.0109488	0.0690895	2.16542	2.07048	2.26036	0.127946	#DIV/0!	#DIV/0!
CG34457	FBgn0085486	1.40918	1.01252	1.80585	-0.581069	-0.691337	-1.53708	#N/A	#N/A	#N/A	#N/A	#N/A	#N/A
CG15128	FBgn0034467	1.40913	0.935741	1.88251	-1.19569	-0.266137	-2.8814	#N/A	#N/A	#N/A	#N/A	#N/A	#N/A
CG15475	FBgn0032867	1.40775	0.952288	1.86322	-1.39319	-0.0973779	-2.92045	#N/A	#N/A	#N/A	#N/A	#N/A	#N/A
CG31007	FBgn0051007	1.40713	1.08255	1.73171	-1.80557	-0.26675	-2.91858	#N/A	#N/A	#N/A	#N/A	#N/A	#N/A
CG14740	FBgn0037988	1.40709	0.939729	1.87445	-1.77955	-0.218775	-2.83501	0.547518	0.522291	0.572746	#DIV/0!	#DIV/0!	#DIV/0!
CG32591	FBgn0052591	1.40636	0.927366	1.88536	-0.315113	-0.204588	-2.11252	#N/A	#N/A	#N/A	#N/A	#N/A	#N/A
Klp59C	FBgn0034824	1.40595	0.963011	1.84889	-2.48166	-0.228984	-3.23044	#N/A	#N/A	#N/A	#N/A	#N/A	#N/A
CG12309	FBgn0033542	1.40377	1.09306	1.71448	0.00675166	-0.56866	-1.43848	#N/A	#N/A	#N/A	#N/A	#N/A	#N/A
CG5565	FBgn0031335	1.40365	0.957175	1.85012	0.141245	-0.255353	-3.1097	#N/A	#N/A	#N/A	#N/A	#N/A	#N/A
tRNA:G3:22BCa	FBgn0011859	1.40236	1.41145	1.39327	0.0710516	-0.278436	-0.412933	#N/A	#N/A	#N/A	#N/A	#N/A	#N/A
CG42564	FBgn0260766	1.40221	0.118947	2.68546	0.101813	0.804938	-0.71684	1.29012	0.729781	1.85045	1.31363	0.803614	0.606067
CG4631	FBgn0032590	1.3967	0.959652	1.83374	-3.2343	-0.219327	-3.62884	#N/A	#N/A	#N/A	#N/A	#N/A	#N/A
CG32081	FBgn0052081	1.3962	0.842223	1.95018	-1.27541	-0.682708	-3.45146	#N/A	#N/A	#N/A	#N/A	#N/A	#N/A
CG2113	FBgn0035384	1.39541	1.07985	1.71097	-1.40002	-0.320396	-2.96164	#N/A	#N/A	#N/A	#N/A	#N/A	#N/A
CG15034	FBgn0029946	1.39471	1.03405	1.75538	-2.49803	-0.351224	-2.71141	#N/A	#N/A	#N/A	#N/A	#N/A	#N/A
CG32450	FBgn0052450	1.39288	0.935479	1.85028	-2.39944	-0.190827	-2.90823	#N/A	#N/A	#N/A	#N/A	#N/A	#N/A
CG3199	FBgn0038210	1.39219	1.14752	1.63686	-2.11723	-0.203527	-3.50425	#N/A	#N/A	#N/A	#N/A	#N/A	#N/A
CG3222	FBgn0036014	1.39181	0.965498	1.81813	-0.892371	-0.30054	-2.74395	#N/A	#N/A	#N/A	#N/A	#N/A	#N/A
CG9129	FBgn0035196	1.39132	0.98057	1.80206	-2.17703	-0.0636689	-2.50041	#N/A	#N/A	#N/A	#N/A	#N/A	#N/A
CG10317	FBgn0038423	1.39123	1.05726	1.72521	-1.78055	-0.478174	-3.0825	#N/A	#N/A	#N/A	#N/A	#N/A	#N/A
Obp56f	FBgn0043533	1.39088	-0.22221	3.00397	-0.285483	1.66288	-0.405424	0.762731	0.224359	1.3011	1.27288	0.632218	0.776433
CG13243	FBgn0028903	1.39087	1.0089	1.77285	-2.0789	-0.504602	-3.60748	#N/A	#N/A	#N/A	#N/A	#N/A	#N/A
CG6441	FBgn0031920	1.38906	0.917415	1.86071	-0.0118414	-0.0703896	-1.69496	#N/A	#N/A	#N/A	#N/A	#N/A	#N/A
CG15510	FBgn0039707	1.38789	1.11837	1.65741	-0.60844	-0.802015	-2.9171	#N/A	#N/A	#N/A	#N/A	#N/A	#N/A
CG17928	FBgn0032603	1.38789	1.46936	1.30641	-0.151685	-0.0604272	0.011987	1.20419	1.36271	1.04567	#DIV/0!	#DIV/0!	#DIV/0!
Drs	FBgn0010381	1.38732	1.84809	0.92656	0.588937	-0.150041	-0.0772021	#N/A	#N/A	#N/A	#N/A	#N/A	#N/A
CG14835	FBgn0035782	1.38699	1.0084	1.76558	-0.585304	-0.284088	-2.07378	#N/A	#N/A	#N/A	#N/A	#N/A	#N/A
CG31275	FBgn0063261	1.38497	0.999101	1.77083	-1.84859	-0.551463	-2.86872	#N/A	#N/A	#N/A	#N/A	#N/A	#N/A
CG43185	FBgn0262814	1.38464	0.121635	2.64765	-0.938708	1.31482	-0.474678	#N/A	#N/A	#N/A	#N/A	#N/A	#N/A
CG31245	FBgn0051245	1.38362	1.04045	1.72679	-1.36085	-0.410411	-3.74311	#N/A	#N/A	#N/A	#N/A	#N/A	#N/A
CG42657	FBgn0261522	1.38306	0.942749	1.82337	-1.1602	-0.512165	-2.73742	#N/A	#N/A	#N/A	#N/A	#N/A	#N/A
CG14072	FBgn0032318	1.38195	0.00299932	2.7609	-0.689335	1.04311	-0.773763	#N/A	#N/A	#N/A	#N/A	#N/A	#N/A
CG43121	FBgn0262581	1.38088	1.00531	1.75645	-0.784624	-0.373814	-1.88301	#N/A	#N/A	#N/A	#N/A	#N/A	#N/A
sip2	FBgn0031878	1.38013	0.990102	1.77015	-0.389504	-0.287249	-2.23259	#N/A	#N/A	#N/A	#N/A	#N/A	#N/A
RpL10Aa	FBgn0038281	1.37998	0.918974	1.84098	-1.20411	-0.104492	-2.78884	#N/A	#N/A	#N/A	#N/A	#N/A	#N/A
CG15711	FBgn0034122	1.3787	1.09402	1.66338	-1.16672	-0.536546	-0.818107	#N/A	#N/A	#N/A	#N/A	#N/A	#N/A
tomboy40	FBgn0033074	1.37844	1.00738	1.7495	-0.524763	-0.186379	-1.80251	#N/A	#N/A	#N/A	#N/A	#N/A	#N/A
CG31659	FBgn0051659	1.37814	-0.169835	2.92612	0.149824	1.37523	-0.449105	0.847987	0.375093	1.32088	1.34068	0.848388	0.70637
CG33293	FBgn0053293	1.37163	1.01319	1.73007	0.214531	-0.176149	-0.72466	#N/A	#N/A	#N/A	#N/A	#N/A	#N/A
MtnE	FBgn0262146	1.37014	1.36084	1.37945	-0.168803	0.205004	0.0637071	#N/A	#N/A	#N/A	#N/A	#N/A	#N/A
CG10869	FBgn0031347	1.36934	0.880478	1.85819	-0.811858	-0.258839	-2.39897	0.770034	0.690125	0.849944	#DIV/0!	#DIV/0!	#DIV/0!
exu	FBgn0000615	1.36824	0.96335	1.77313	-0.325126	-0.127522	-0.977542	0.502267	0.938212	0.0663215	#DIV/0!	#DIV/0!	#DIV/0!
CG9861	FBgn0034844	1.36628	0.853895	1.87866	-1.07035	-0.0841949	-2.74687	#N/A	#N/A	#N/A	#N/A	#N/A	#N/A
CG5139	FBgn0031323	1.3631	0.864377	1.86183	-0.650514	-0.275764	-2.66657	#N/A	#N/A	#N/A	#N/A	#N/A	#N/A
CG9458	FBgn0037765	1.36298	2.10033	0.625631	-0.0683953	-0.180712	-0.0119085	#N/A	#N/A	#N/A	#N/A	#N/A	#N/A
CG6140	FBgn0036162	1.36193	0.87306	1.85081	-1.58505	0.0556416	-1.93446	0.42755	0.550389	0.304711	-0.0379559	-0.445428	-0.234008
CG30278	FBgn0050278	1.35923	1.09759	1.62087	-2.2478	-0.367651	-3.17975	#N/A	#N/A	#N/A	#N/A	#N/A	#N/A
CG2291	FBgn0033279	1.35864	1.02573	1.69154	-2.25714	-0.530845	-2.74949	#N/A	#N/A	#N/A	#N/A	#N/A	#N/A
CG1340	FBgn0039797	1.35769	0.860257	1.85513	-1.68412	-0.250278	-3.18871	#N/A	#N/A	#N/A	#N/A	#N/A	#N/A
CG8065	FBgn0036075	1.35437	0.961926	1.74681	-1.28247	-0.783257	-3.08011	#N/A	#N/A	#N/A	#N/A	#N/A	#N/A
Cyp6a2	FBgn0000473	1.35216	1.40264	1.30167	0.0541591	-0.0851826	-0.00447047	1.55915	1.5593	1.559	0.444686	-0.619588	-0.393166
CG42523	FBgn0260428	1.35112	0.961719	1.74052	-2.05073	-0.451462	-2.45596	#N/A	#N/A	#N/A	#N/A	#N/A	#N/A
CG16957	FBgn0032519	1.34999	0.995193	1.70479	-2.63847	-0.230243	-2.80573	#N/A	#N/A	#N/A	#N/A	#N/A	#N/A
CG18418	FBgn0035568	1.3477	0.996658	1.69874	-2.96715	-0.647866	-3.35301	#N/A	#N/A	#N/A	#N/A	#N/A	#N/A
CG12307	FBgn0032370	1.34244	1.06196	1.62292	-2.029	-0.389762	-3.21559	#N/A	#N/A	#N/A	#N/A	#N/A	#N/A
Cyp6a20	FBgn0033980	1.34112	1.41569	1.26656	0.0376322	-0.0678923	-0.057454	-1.65445	-2.50927	-0.799636	-0.816945	1.91083	0.0995715
sowi	FBgn0037460	1.34098	1.03297	1.64898	-2.05818	-0.277618	-2.76185	#N/A	#N/A	#N/A	#N/A	#N/A	#N/A
Dic2	FBgn0038797	1.3385	0.81844	1.85856	-2.99566	-0.319859	-2.97991	#N/A	#N/A	#N/A	#N/A	#N/A	#N/A
CG6332	FBgn0038921	1.3372	0.958636	1.71577	-0.315639	-0.118728	-1.18251	#N/A	#N/A	#N/A	#N/A	#N/A	#N/A
CG11043	FBgn0031831	1.33493	1.15618	1.51369	0.195211	-0.246098	-0.649588	1.22956	1.18905	1.27006	#DIV/0!	#DIV/0!	#DIV/0!
schuy	FBgn0036925	1.33335	0.896881	1.76981	-2.97892	-0.246651	-3.29986	#N/A	#N/A	#N/A	#N/A	#N/A	#N/A
CG10164	FBgn0039088	1.33298	0.828394	1.83758	-3.37475	-0.118131	-3.37988	#N/A	#N/A	#N/A	#N/A	#N/A	#N/A
CG7309	FBgn0032314	1.32978	0.916678	1.74288	-1.79491	-0.469786	-3.32035	#N/A	#N/A	#N/A	#N/A	#N/A	#N/A
SIP2	FBgn0061197	1.32912	0.811432	1.8468	-0.548561	-0.142888	-1.97244	-0.107584	-0.0728058	-0.142361	#DIV/0!	#DIV/0!	#DIV/0!
CG9632	FBgn0038377	1.32747	1.01226	1.64268	-0.6315	-0.289335	-2.01265	#N/A	#N/A	#N/A	#N/A	#N/A	#N/A
CG34160	FBgn0250826	1.32577	1.03797	1.61357	-1.30322	-0.322425	-2.56298	#N/A	#N/A	#N/A	#N/A	#N/A	#N/A
CG43922	FBgn0264543	1.32542	1.0845	1.56634	-0.888451	-0.632444	-2.33524	#N/A	#N/A	#N/A	#N/A	#N/A	#N/A
smp-30	FBgn0038257	1.32488	1.44901	1.20075	-0.291271	-0.0034658	0.133162	1.10268	0.99579	1.20957	-0.0764644	0.551191	0.88251
CG30192	FBgn0050192	1.32482	1.10493	1.54471	-1.5574	-0.845793	-2.802	#N/A	#N/A	#N/A	#N/A	#N/A	#N/A
CG31787	FBgn0051787	1.32472	0.967364	1.68207	-1.39804	-0.627931	-3.76097	#N/A	#N/A	#N/A	#N/A	#N/A	#N/A
CG13110	FBgn0032111	1.32296	1.02965	1.61627	-2.61779	-0.712329	-3.15882	#N/A	#N/A	#N/A	#N/A	#N/A	#N/A
CG3964	FBgn0031574	1.3177	0.814054	1.82135	0.460711	-0.359496	-1.94296	0.0582207	0.048077	0.0683643	#DIV/0!	#DIV/0!	#DIV/0!
CG30412	FBgn0050412	1.31654	0.884079	1.749	-2.51959	-0.203082	-3.70246	#N/A	#N/A	#N/A	#N/A	#N/A	#N/A
CG32655	FBgn0052655	1.31517	0.91767	1.71267	-2.6719	-0.265658	-3.56901	#N/A	#N/A	#N/A	#N/A	#N/A	#N/A
tim	FBgn0014396	1.31489	1.5755	1.05427	0.118302	0.0362881	0.119561	#N/A	#N/A	#N/A	#N/A	#N/A	#N/A
CG43209	FBgn0262845	1.31262	0.898938	1.7263	-0.577615	-0.138503	-1.93707	#N/A	#N/A	#N/A	#N/A	#N/A	#N/A
sxe2	FBgn0038398	1.31236	1.38847	1.23626	-0.490676	-0.135027	-0.0618128	0.763771	0.793781	0.733762	0.124968	-0.123768	0.0544832
CG8838	FBgn0031526	1.31129	0.845368	1.7772	-0.249974	-0.430032	-2.90375	#N/A	#N/A	#N/A	#N/A	#N/A	#N/A
CG3581	FBgn0038697	1.30862	0.801532	1.8157	-2.55884	-0.313992	-3.0303	#N/A	#N/A	#N/A	#N/A	#N/A	#N/A
Rcd7	FBgn0260461	1.30794	0.875926	1.73995	-0.390616	-0.24932	-1.56105	#N/A	#N/A	#N/A	#N/A	#N/A	#N/A
CG14488	FBgn0034278	1.30764	0.86635	1.74893	-0.952172	-0.409092	-2.31877	#N/A	#N/A	#N/A	#N/A	#N/A	#N/A
CG9570	FBgn0031085	1.30641	0.845993	1.76682	-2.79133	-0.266257	-2.95121	#N/A	#N/A	#N/A	#N/A	#N/A	#N/A
Lectin-galC1	FBgn0016675	1.30412	2.12042	0.487814	-0.175585	-0.159109	0.0609794	0.650162	0.930272	0.370052	0.774807	0.195171	0.366859
CG3085	FBgn0034816	1.30377	0.834147	1.7734	-0.779114	-0.125299	-1.2936	0.603877	0.550177	0.657576	#DIV/0!	#DIV/0!	#DIV/0!
CG3809	FBgn0037995	1.30344	0.860435	1.74645	-2.5498	-0.180756	-3.30708	#N/A	#N/A	#N/A	#N/A	#N/A	#N/A
CG31949	FBgn0051949	1.30318	1.05994	1.54642	-0.448197	-0.778325	-2.63006	#N/A	#N/A	#N/A	#N/A	#N/A	#N/A
CG17843	FBgn0038919	1.30274	0.899422	1.70605	-0.100243	-0.0346632	-0.203668	1.13865	0.639484	1.63782	0.596654	0.603746	0.47382
Iris	FBgn0031305	1.30251	1.33032	1.27469	-0.0775013	0.0507783	0.148365	1.439	1.50548	1.37253	-0.50467	0.236754	0.40976
skpF	FBgn0034863	1.30121	0.915456	1.68695	-0.891557	-0.234373	-3.09773	#N/A	#N/A	#N/A	#N/A	#N/A	#N/A
CG1690	FBgn0033442	1.29968	0.846571	1.75279	-1.17623	-0.379703	-2.86687	#N/A	#N/A	#N/A	#N/A	#N/A	#N/A
CG31029	FBgn0051029	1.29814	0.772656	1.82362	-0.775575	-0.171571	-1.286	#N/A	#N/A	#N/A	#N/A	#N/A	#N/A
CG31407	FBgn0051407	1.29782	0.929799	1.66584	-1.87598	-0.386468	-3.44338	#N/A	#N/A	#N/A	#N/A	#N/A	#N/A
CG31459	FBgn0051459	1.2973	0.844851	1.74975	-1.69058	-0.119934	-3.3398	#N/A	#N/A	#N/A	#N/A	#N/A	#N/A
CG32026	FBgn0052026	1.29695	0.894024	1.69987	-0.967559	-0.344154	-3.3109	-0.00918825	-0.030599	0.0122225	-0.128615	-0.118699	-0.0117785
CG11635	FBgn0033283	1.29482	0.980318	1.60932	-2.18722	-0.454053	-3.1449	#N/A	#N/A	#N/A	#N/A	#N/A	#N/A
CG1287	FBgn0037506	1.29108	0.874507	1.70765	-0.562834	-0.0358841	-2.66984	#N/A	#N/A	#N/A	#N/A	#N/A	#N/A
CG15638	FBgn0028943	1.29029	0.901096	1.67948	-0.925269	-0.227033	-3.20323	#N/A	#N/A	#N/A	#N/A	#N/A	#N/A
CG15198	FBgn0030283	1.28964	0.868692	1.71058	-2.44933	-0.0528413	-2.62034	#N/A	#N/A	#N/A	#N/A	#N/A	#N/A
CG14589	FBgn0033063	1.28868	0.966112	1.61125	0.00173849	-0.470688	-1.31457	#N/A	#N/A	#N/A	#N/A	#N/A	#N/A
CG32119	FBgn0052119	1.28687	0.911369	1.66236	-1.55795	-0.23863	-2.57147	#N/A	#N/A	#N/A	#N/A	#N/A	#N/A
CG30487	FBgn0050487	1.28561	0.981996	1.58922	-1.25051	-0.22694	-2.73111	#N/A	#N/A	#N/A	#N/A	#N/A	#N/A
CG3492	FBgn0035007	1.28553	0.8727	1.69836	-2.64503	-0.222784	-3.37038	#N/A	#N/A	#N/A	#N/A	#N/A	#N/A
CG8813	FBgn0031476	1.28508	1.01438	1.55579	-0.00888207	-0.242549	-1.29565	1.25915	1.07644	1.44186	#DIV/0!	#DIV/0!	#DIV/0!
CG9642	FBgn0034183	1.28481	1.29695	1.27267	-0.0481226	-0.303272	-0.851319	#N/A	#N/A	#N/A	#N/A	#N/A	#N/A
CG8746	FBgn0033330	1.28262	0.898133	1.6671	-3.17948	-0.130705	-2.7787	#N/A	#N/A	#N/A	#N/A	#N/A	#N/A
CG31008	FBgn0051008	1.28224	1.03457	1.52991	-1.29015	-0.363198	-3.84453	#N/A	#N/A	#N/A	#N/A	#N/A	#N/A
CG13168	FBgn0033705	1.28215	0.836236	1.72806	-1.23429	-0.382234	-2.51299	#N/A	#N/A	#N/A	#N/A	#N/A	#N/A
Cyp6g1	FBgn0025454	1.27945	0.656479	1.90241	-0.0567699	0.146658	0.155203	0.58156	0.441277	0.721843	-0.394842	0.206021	-0.0668713
CG7755	FBgn0034105	1.27922	1.02718	1.53127	-2.7335	-0.127181	-3.04075	#N/A	#N/A	#N/A	#N/A	#N/A	#N/A
CG1137	FBgn0037454	1.27842	0.79715	1.75969	-1.59152	-0.334315	-3.01643	#N/A	#N/A	#N/A	#N/A	#N/A	#N/A
boly	FBgn0050362	1.27693	0.727107	1.82675	-2.03939	-0.378907	-2.73223	#N/A	#N/A	#N/A	#N/A	#N/A	#N/A
CG33308	FBgn0250834	1.27495	1.12196	1.42795	-1.99149	-0.487048	-3.04841	#N/A	#N/A	#N/A	#N/A	#N/A	#N/A
CG43343	FBgn0263048	1.27481	0.835691	1.71393	0.122145	-0.0565438	-0.741496	-0.906478	-0.404946	-1.40801	0.327639	-0.174638	0.128828
CG6790	FBgn0037915	1.27434	0.856953	1.69174	-0.622443	-0.682014	-2.75387	#N/A	#N/A	#N/A	#N/A	#N/A	#N/A
CG32459	FBgn0052459	1.27331	0.883203	1.66342	-0.604196	-0.216648	-2.57158	#N/A	#N/A	#N/A	#N/A	#N/A	#N/A
CG30056	FBgn0050056	1.27318	0.905627	1.64073	-1.0977	-0.549318	-2.11045	#N/A	#N/A	#N/A	#N/A	#N/A	#N/A
Sems	FBgn0037036	1.27314	0.0632315	2.48305	-0.682496	1.38839	-0.580941	0.941219	0.526792	1.35565	0.277821	0.298381	0.333552
t-cup	FBgn0051858	1.27312	0.848899	1.69734	-0.445286	-0.194362	-3.85206	#N/A	#N/A	#N/A	#N/A	#N/A	#N/A
CG14113	FBgn0040814	1.27113	0.97165	1.57061	-1.3147	-0.788716	-3.13189	#N/A	#N/A	#N/A	#N/A	#N/A	#N/A
CG7295	FBgn0031372	1.27082	0.736397	1.80524	-1.14371	-0.568699	-1.69763	#N/A	#N/A	#N/A	#N/A	#N/A	#N/A
CG9014	FBgn0028847	1.26821	0.838091	1.69832	-2.01442	-0.185062	-2.96983	#N/A	#N/A	#N/A	#N/A	#N/A	#N/A
CG17744	FBgn0035730	1.26803	0.871324	1.66474	-1.36263	-0.777743	-3.07002	#N/A	#N/A	#N/A	#N/A	#N/A	#N/A
CG14448	FBgn0037191	1.2671	0.980511	1.55368	-1.03942	-0.4458	-2.45642	#N/A	#N/A	#N/A	#N/A	#N/A	#N/A
CG32148	FBgn0047338	1.26656	1.01029	1.52282	-2.06248	-0.270209	-2.4423	#N/A	#N/A	#N/A	#N/A	#N/A	#N/A
CG7387	FBgn0035852	1.26484	0.875195	1.65448	0.617245	-0.424884	-2.1749	#N/A	#N/A	#N/A	#N/A	#N/A	#N/A
CG42847	FBgn0262036	1.26465	0.933574	1.59572	-2.47345	-0.27097	-2.90395	#N/A	#N/A	#N/A	#N/A	#N/A	#N/A
CG7669	FBgn0038607	1.26415	0.7654	1.7629	-0.385356	-0.320159	-2.27645	#N/A	#N/A	#N/A	#N/A	#N/A	#N/A
CG5144	FBgn0035957	1.2636	0.97956	1.54763	0.690803	0.0501372	0.12122	0.31398	0.143938	0.484021	0.1251	-0.0603013	0.0396413
CG34170	FBgn0085199	1.26324	1.10012	1.42635	-1.09973	-0.606419	-2.46114	#N/A	#N/A	#N/A	#N/A	#N/A	#N/A
CG13733	FBgn0036729	1.26244	0.887262	1.63761	-0.256914	-0.375838	-1.83503	#N/A	#N/A	#N/A	#N/A	#N/A	#N/A
CG13700	FBgn0036785	1.2612	0.822885	1.69951	-2.95718	-0.272407	-3.58302	#N/A	#N/A	#N/A	#N/A	#N/A	#N/A
CG7069	FBgn0038952	1.26054	0.877378	1.64369	-0.404113	-0.180479	-1.02789	#N/A	#N/A	#N/A	#N/A	#N/A	#N/A
CG17083	FBgn0039070	1.25922	0.885628	1.63282	-1.29876	-0.362936	-2.70689	#N/A	#N/A	#N/A	#N/A	#N/A	#N/A
CG17098	FBgn0032276	1.25892	0.728571	1.78927	-1.61979	-0.324689	-3.0162	#N/A	#N/A	#N/A	#N/A	#N/A	#N/A
CG31861	FBgn0051861	1.25855	0.906006	1.6111	0.212717	-0.767302	-1.8257	#N/A	#N/A	#N/A	#N/A	#N/A	#N/A
CG31468	FBgn0047351	1.25803	0.83619	1.67988	-0.745384	0.0963717	-2.38171	#N/A	#N/A	#N/A	#N/A	#N/A	#N/A
CG14128	FBgn0036218	1.25648	0.896585	1.61638	-0.767724	-0.767426	-2.46485	#N/A	#N/A	#N/A	#N/A	#N/A	#N/A
Cyp12a5	FBgn0038680	1.25605	0.688229	1.82386	-0.169721	-0.176195	-0.0152827	0.526922	0.184872	0.868972	0.373633	0.0541507	-0.0666935
CG17819	FBgn0038915	1.25556	1.02323	1.4879	-0.274922	-0.832359	-2.16264	#N/A	#N/A	#N/A	#N/A	#N/A	#N/A
TTLL3B	FBgn0031853	1.25454	0.841903	1.66717	-1.47721	-0.151975	-3.17774	#N/A	#N/A	#N/A	#N/A	#N/A	#N/A
CG4198	FBgn0029753	1.2539	0.932009	1.5758	-2.25465	-0.471531	-3.75139	#N/A	#N/A	#N/A	#N/A	#N/A	#N/A
CG13978	FBgn0039518	1.25297	0.830965	1.67497	-1.53002	-0.461145	-4.04792	#N/A	#N/A	#N/A	#N/A	#N/A	#N/A
ssp5	FBgn0037985	1.2529	0.637729	1.86807	-2.15392	-0.0239132	-3.42917	#N/A	#N/A	#N/A	#N/A	#N/A	#N/A
CG43788	FBgn0264329	1.25206	-0.936456	3.44058	-0.582441	0.693735	-0.673031	#N/A	#N/A	#N/A	#N/A	#N/A	#N/A
CG31141	FBgn0051141	1.25166	1.03233	1.471	-1.24266	-0.501112	-3.66956	#N/A	#N/A	#N/A	#N/A	#N/A	#N/A
CG32161	FBgn0052161	1.24993	0.802004	1.69786	-0.844661	-0.249662	-2.89121	#N/A	#N/A	#N/A	#N/A	#N/A	#N/A
CG12229	FBgn0036723	1.24972	0.902281	1.59715	-0.503192	-0.337177	-1.58562	#N/A	#N/A	#N/A	#N/A	#N/A	#N/A
CG34456	FBgn0085485	1.24569	1.05202	1.43936	-0.118254	0.120057	0.288074	#N/A	#N/A	#N/A	#N/A	#N/A	#N/A
CG43935	FBgn0264563	1.24284	0.811677	1.674	-0.811094	-0.226482	-1.55895	#N/A	#N/A	#N/A	#N/A	#N/A	#N/A
CG5280	FBgn0035952	1.24161	0.893348	1.58988	-0.188327	-0.358294	-1.24144	#N/A	#N/A	#N/A	#N/A	#N/A	#N/A
CG14391	FBgn0038078	1.24048	1.03581	1.44514	-0.658659	-0.685036	-2.66994	#N/A	#N/A	#N/A	#N/A	#N/A	#N/A
Cht12	FBgn0050293	1.2375	0.837561	1.63745	-0.135699	-0.050115	-2.8635	#N/A	#N/A	#N/A	#N/A	#N/A	#N/A
CG8750	FBgn0040812	1.23568	0.963591	1.50777	-1.47774	-0.167159	-2.8559	#N/A	#N/A	#N/A	#N/A	#N/A	#N/A
CG18234	FBgn0036794	1.23551	-0.113436	2.58446	0.24892	1.68591	-0.649757	#N/A	#N/A	#N/A	#N/A	#N/A	#N/A
CG7211	FBgn0031941	1.2337	0.892027	1.57538	0.176022	-0.124444	-2.8749	#N/A	#N/A	#N/A	#N/A	#N/A	#N/A
CG14974	FBgn0040694	1.23229	1.07368	1.3909	-1.202	-0.28451	-4.13951	#N/A	#N/A	#N/A	#N/A	#N/A	#N/A
CG18609	FBgn0034382	1.23175	1.66232	0.801181	-0.0318374	-0.124377	-0.00396421	#N/A	#N/A	#N/A	#N/A	#N/A	#N/A
tobi	FBgn0261575	1.23096	1.43892	1.02301	-0.0924019	0.0869892	0.170765	1.39333	1.68081	1.10585	-0.360241	0.247119	0.534236
Hex-t2	FBgn0042710	1.23095	0.80837	1.65353	-1.68606	-0.163375	-2.56497	1.13636	0.951635	1.32108	#DIV/0!	#DIV/0!	#DIV/0!
CG42556	FBgn0260758	1.23041	0.771257	1.68956	-0.658275	-0.585075	-2.4612	#N/A	#N/A	#N/A	#N/A	#N/A	#N/A
Cyp6a17	FBgn0015714	1.22754	1.41932	1.03575	-0.155167	-0.0258338	0.00796408	1.57834	1.69351	1.46317	0.116088	-0.245786	-0.509823
CG3565	FBgn0035034	1.22676	0.9667	1.48682	-1.46535	-0.602547	-2.91379	#N/A	#N/A	#N/A	#N/A	#N/A	#N/A
CG7202	FBgn0037086	1.22552	0.867754	1.58329	-0.783383	-0.53558	-2.24693	#N/A	#N/A	#N/A	#N/A	#N/A	#N/A
c-cup	FBgn0031367	1.22517	0.838943	1.6114	-1.14603	-0.461776	-3.29422	#N/A	#N/A	#N/A	#N/A	#N/A	#N/A
CG10862	FBgn0035455	1.22444	0.758084	1.69079	-0.73199	-0.46044	-3.6711	#N/A	#N/A	#N/A	#N/A	#N/A	#N/A
CG34434	FBgn0250904	1.22167	0.77337	1.66996	1.70608	-0.769212	-1.79908	#N/A	#N/A	#N/A	#N/A	#N/A	#N/A
CG1958	FBgn0029940	1.22078	0.857231	1.58432	-1.84256	-0.294426	-2.67649	#N/A	#N/A	#N/A	#N/A	#N/A	#N/A
CG31294	FBgn0051294	1.21834	0.971166	1.46552	-2.19024	-0.583545	-4.06333	#N/A	#N/A	#N/A	#N/A	#N/A	#N/A
CG30488	FBgn0050488	1.21809	-0.132506	2.56868	-0.638813	1.16524	-0.853064	0.636843	0.260703	1.01298	#DIV/0!	#DIV/0!	#DIV/0!
CG15286	FBgn0028531	1.21778	0.733571	1.70199	-0.988241	-0.201259	-3.58717	#N/A	#N/A	#N/A	#N/A	#N/A	#N/A
CG43144	FBgn0262620	1.21674	0.110125	2.32336	0.593513	0.378708	0.0893153	#N/A	#N/A	#N/A	#N/A	#N/A	#N/A
CG6168	FBgn0036154	1.21173	-0.201923	2.62539	-0.322251	1.6893	-0.577157	0.4767	0.161406	0.791995	#DIV/0!	#DIV/0!	#DIV/0!
CG43050	FBgn0262352	1.21114	0.176847	2.24544	0.283338	1.15514	-0.866468	#N/A	#N/A	#N/A	#N/A	#N/A	#N/A
CG7557	FBgn0036159	1.20887	0.725168	1.69257	-1.40705	-0.208426	-3.62271	#N/A	#N/A	#N/A	#N/A	#N/A	#N/A
CG17944	FBgn0037500	1.20823	0.774932	1.64153	-2.79674	-0.216299	-2.98091	#N/A	#N/A	#N/A	#N/A	#N/A	#N/A
CG14861	FBgn0038280	1.20788	0.874171	1.54158	-2.03593	-0.640626	-3.18969	#N/A	#N/A	#N/A	#N/A	#N/A	#N/A
CG34299	FBgn0085328	1.20706	-0.129415	2.54354	-0.704555	1.43205	-0.82326	#N/A	#N/A	#N/A	#N/A	#N/A	#N/A
CG43277	FBgn0262966	1.20674	1.06227	1.35122	-1.17729	-0.718961	-2.09773	#N/A	#N/A	#N/A	#N/A	#N/A	#N/A
CG9961	FBgn0031451	1.20538	0.926617	1.48415	1.03508	-0.291235	-0.50855	#N/A	#N/A	#N/A	#N/A	#N/A	#N/A
CG7311	FBgn0028848	1.20213	0.676402	1.72787	-2.00209	-0.0695639	-2.93788	#N/A	#N/A	#N/A	#N/A	#N/A	#N/A
CG9222	FBgn0031784	1.20188	0.810959	1.59279	-1.46481	-0.157751	-2.8048	#N/A	#N/A	#N/A	#N/A	#N/A	#N/A
CG42850	FBgn0262097	1.19938	0.689543	1.70921	-2.27652	-0.443213	-3.86298	#N/A	#N/A	#N/A	#N/A	#N/A	#N/A
CG31204	FBgn0051204	1.19822	0.726888	1.66955	-1.87761	-0.318532	-3.50891	#N/A	#N/A	#N/A	#N/A	#N/A	#N/A
CG7164	FBgn0031946	1.1958	0.809949	1.58166	-1.57537	-0.105111	-3.17384	#N/A	#N/A	#N/A	#N/A	#N/A	#N/A
FucTD	FBgn0035217	1.19497	0.774521	1.61542	-2.13972	-0.310722	-3.36448	#N/A	#N/A	#N/A	#N/A	#N/A	#N/A
CG10749	FBgn0036328	1.19249	0.813488	1.57149	-2.49144	-0.325348	-3.61883	1.34008	1.26726	1.41291	#DIV/0!	#DIV/0!	#DIV/0!
Obp99a	FBgn0039678	1.19229	0.856437	1.52815	-0.464845	0.204246	0.198841	0.628772	0.640555	0.616989	-0.0979314	-0.402295	-0.261767
Sfp26Ac	FBgn0259959	1.1922	0.294078	2.09032	-0.784135	0.283491	-0.930152	0.976622	0.383238	1.57001	#DIV/0!	#DIV/0!	#DIV/0!
PH4alphaNE3	FBgn0051017	1.19077	-0.117316	2.49886	-0.670452	1.61679	-0.797086	#N/A	#N/A	#N/A	#N/A	#N/A	#N/A
CR43754	FBgn0264085	1.18991	0.0219083	2.35792	0.0947074	1.42387	-0.934321	#N/A	#N/A	#N/A	#N/A	#N/A	#N/A
CG11404	FBgn0037169	1.18894	0.796783	1.5811	0.186422	-0.838955	-2.72676	#N/A	#N/A	#N/A	#N/A	#N/A	#N/A
CG17717	FBgn0029877	1.18715	1.11901	1.25528	0.301356	-0.427555	-0.98441	#N/A	#N/A	#N/A	#N/A	#N/A	#N/A
Arp53D	FBgn0011743	1.18708	0.658893	1.71527	-0.0512356	-0.260133	-2.74583	-0.10921	-0.0596206	-0.158799	#DIV/0!	#DIV/0!	#DIV/0!
CG10064	FBgn0035724	1.18659	0.846281	1.5269	-0.390919	-0.441241	-2.58826	-0.388273	-1.00084	0.224291	#DIV/0!	#DIV/0!	#DIV/0!
CG31104	FBgn0051104	1.18522	1.61544	0.755003	-0.883837	-0.0779024	0.077742	0.893848	1.03091	0.756787	-1.48638	0.190565	0.397939
Spn7	FBgn0083141	1.18415	0.233942	2.13436	-1.91865	0.479174	-0.94343	0.960625	0.542589	1.37866	#DIV/0!	#DIV/0!	#DIV/0!
CG34324	FBgn0085353	1.1831	1.66084	0.705368	0.0329496	0.0425636	0.125117	0.465369	0.316754	0.613984	-0.367219	0.584668	-0.0856791
CG32437	FBgn0052437	1.18303	0.730203	1.63586	-1.55299	-0.080083	-3.10755	#N/A	#N/A	#N/A	#N/A	#N/A	#N/A
CG10014	FBgn0038000	1.18033	0.730399	1.63027	1.38385	0.315554	-0.167577	#N/A	#N/A	#N/A	#N/A	#N/A	#N/A
CG12784	FBgn0038356	1.18017	0.931616	1.42872	-1.54424	-0.690323	-3.27951	#N/A	#N/A	#N/A	#N/A	#N/A	#N/A
CG32548	FBgn0052548	1.17949	0.773032	1.58595	-0.703988	-0.208594	-1.21812	-0.0632343	-0.133022	0.00655381	#DIV/0!	#DIV/0!	#DIV/0!
CG31482	FBgn0051482	1.17834	0.811915	1.54476	-2.32801	-0.324002	-2.86594	#N/A	#N/A	#N/A	#N/A	#N/A	#N/A
CG33060	FBgn0053060	1.17696	0.927903	1.42602	-1.26466	-0.729886	-2.57976	#N/A	#N/A	#N/A	#N/A	#N/A	#N/A
CG17991	FBgn0039498	1.1762	0.845493	1.5069	-0.658962	-0.276447	-2.47038	#N/A	#N/A	#N/A	#N/A	#N/A	#N/A
CG11018	FBgn0034464	1.17237	0.797816	1.54693	-2.61121	-0.691869	-3.16952	#N/A	#N/A	#N/A	#N/A	#N/A	#N/A
CG16926	FBgn0040732	1.1722	0.929178	1.41523	-0.0735938	0.0268388	0.0414091	#N/A	#N/A	#N/A	#N/A	#N/A	#N/A
Ppm1	FBgn0035143	1.17148	0.697897	1.64506	0.960208	-0.086496	-1.98827	0.343283	0.35347	0.333096	#DIV/0!	#DIV/0!	#DIV/0!
CG15124	FBgn0034461	1.17121	0.843958	1.49846	-2.59785	-0.573876	-2.94405	#N/A	#N/A	#N/A	#N/A	#N/A	#N/A
CG31921	FBgn0051921	1.1709	0.7588	1.58299	-1.18699	-0.151593	-2.4698	#N/A	#N/A	#N/A	#N/A	#N/A	#N/A
CG6209	FBgn0033862	1.17083	0.763212	1.57845	-1.65034	-0.222656	-3.45456	#N/A	#N/A	#N/A	#N/A	#N/A	#N/A
CG17666	FBgn0036311	1.17065	0.703247	1.63804	-0.838537	-0.0491124	-2.92473	#N/A	#N/A	#N/A	#N/A	#N/A	#N/A
Fhos	FBgn0261259	1.17019	1.08455	1.25583	-0.193556	-0.40038	-0.528658	#N/A	#N/A	#N/A	#N/A	#N/A	#N/A
CG4520	FBgn0038355	1.1701	0.782461	1.55774	-1.89259	-0.694933	-3.00029	#N/A	#N/A	#N/A	#N/A	#N/A	#N/A
CG8476	FBgn0038127	1.16935	0.854566	1.48414	-1.55345	-0.499005	-2.99229	#N/A	#N/A	#N/A	#N/A	#N/A	#N/A
CG31496	FBgn0051496	1.16915	0.101252	2.23705	0.139754	2.18005	-0.43518	#N/A	#N/A	#N/A	#N/A	#N/A	#N/A
CG16739	FBgn0034505	1.169	0.864032	1.47397	-0.684613	-0.341598	-1.53995	#N/A	#N/A	#N/A	#N/A	#N/A	#N/A
Sfp84E	FBgn0259974	1.16766	-0.207847	2.54317	-0.923197	1.60834	-0.971744	#DIV/0!	#DIV/0!	#DIV/0!	#DIV/0!	#DIV/0!	#DIV/0!
CG12679	FBgn0031103	1.16601	0.72217	1.60986	-1.88171	-0.349859	-3.31311	#N/A	#N/A	#N/A	#N/A	#N/A	#N/A
CG15408	FBgn0031523	1.16593	1.40604	0.925828	-0.565244	0.1371	0.152273	#N/A	#N/A	#N/A	#N/A	#N/A	#N/A
CG17010	FBgn0032424	1.16582	0.800271	1.53136	-2.03327	-0.132827	-3.3527	#N/A	#N/A	#N/A	#N/A	#N/A	#N/A
CG15459	FBgn0031108	1.16578	0.8434	1.48817	-0.740661	-0.276734	-1.99053	#N/A	#N/A	#N/A	#N/A	#N/A	#N/A
blanks	FBgn0035608	1.16478	0.976253	1.35331	1.74381	0.0810665	-0.483093	0.188218	0.167653	0.208783	#DIV/0!	#DIV/0!	#DIV/0!
CG43146	FBgn0262622	1.16478	0.0159024	2.31366	0.725254	1.38523	-0.760154	#N/A	#N/A	#N/A	#N/A	#N/A	#N/A
CG31205	FBgn0051205	1.16422	0.932256	1.39617	0.0208264	-0.0439148	-0.0943878	0.944304	1.11297	0.775636	#DIV/0!	#DIV/0!	#DIV/0!
CG33136	FBgn0053136	1.16394	1.10817	1.21972	-1.4274	-0.9902	-3.50074	#N/A	#N/A	#N/A	#N/A	#N/A	#N/A
CG12617	FBgn0040996	1.16337	0.764505	1.56223	-2.89334	-0.264496	-2.48128	#N/A	#N/A	#N/A	#N/A	#N/A	#N/A
CG31697	FBgn0051697	1.16129	0.777554	1.54502	0.291618	0.0908376	-1.09044	#N/A	#N/A	#N/A	#N/A	#N/A	#N/A
CG2533	FBgn0030319	1.16025	0.898574	1.42193	0.605735	-0.18113	-1.35835	#N/A	#N/A	#N/A	#N/A	#N/A	#N/A
CG43056	FBgn0262358	1.15957	0.0847288	2.23441	0.106464	1.12282	-0.552234	1.52796	0.888663	2.16726	#DIV/0!	#DIV/0!	#DIV/0!
CG15530	FBgn0039752	1.15875	0.871731	1.44576	-0.273179	-0.488449	-2.1309	#N/A	#N/A	#N/A	#N/A	#N/A	#N/A
CG32440	FBgn0052440	1.15791	0.967879	1.34794	-1.55276	-0.858239	-2.16169	#N/A	#N/A	#N/A	#N/A	#N/A	#N/A
CG8508	FBgn0038123	1.15784	0.801466	1.51421	-0.550358	-0.534561	-3.05237	#N/A	#N/A	#N/A	#N/A	#N/A	#N/A
CG42288	FBgn0259184	1.15716	0.743497	1.57082	-1.57863	-0.349772	-2.42975	#N/A	#N/A	#N/A	#N/A	#N/A	#N/A
S-Lap5	FBgn0033860	1.15604	0.703334	1.60874	-1.01115	-0.209564	-3.43524	#N/A	#N/A	#N/A	#N/A	#N/A	#N/A
CG1988	FBgn0037464	1.15423	0.645871	1.66259	-1.02413	-0.190589	-2.80115	#N/A	#N/A	#N/A	#N/A	#N/A	#N/A
CG15086	FBgn0034374	1.15407	0.544839	1.7633	-2.13325	-0.158969	-3.84401	#N/A	#N/A	#N/A	#N/A	#N/A	#N/A
CG12362	FBgn0036082	1.1529	0.838904	1.4669	-2.10987	-0.267558	-3.2046	#N/A	#N/A	#N/A	#N/A	#N/A	#N/A
CG31391	FBgn0051391	1.14904	0.751208	1.54686	-0.353159	-0.30577	-2.5694	#N/A	#N/A	#N/A	#N/A	#N/A	#N/A
CG42471	FBgn0259961	1.14853	-0.173732	2.47078	-1.52775	1.09918	-0.925124	#N/A	#N/A	#N/A	#N/A	#N/A	#N/A
CG12521	FBgn0040816	1.14687	0.91716	1.37658	-1.1408	-0.606349	-3.10982	#N/A	#N/A	#N/A	#N/A	#N/A	#N/A
CG4706	FBgn0037862	1.14591	0.667261	1.62456	-2.51915	-0.326113	-3.74053	0.373232	0.404	0.342464	-0.0845352	-0.0352033	0.151808
Klp59D	FBgn0034827	1.14578	0.656448	1.63512	-1.76598	-0.377849	-2.91833	#N/A	#N/A	#N/A	#N/A	#N/A	#N/A
CG30393	FBgn0050393	1.14405	0.74271	1.54539	0.539295	-0.254993	-1.72422	#N/A	#N/A	#N/A	#N/A	#N/A	#N/A
CG10298	FBgn0037432	1.13994	0.808364	1.47151	-0.0461191	-0.312367	-1.6031	0.375479	0.309922	0.441036	#DIV/0!	#DIV/0!	#DIV/0!
CG31473	FBgn0051473	1.13624	0.985698	1.28678	-0.320303	-0.339703	-0.904051	#N/A	#N/A	#N/A	#N/A	#N/A	#N/A
h-cup	FBgn0038334	1.13523	0.71439	1.55606	-1.01868	-0.382631	-2.76242	#N/A	#N/A	#N/A	#N/A	#N/A	#N/A
CG13442	FBgn0034546	1.13377	0.803121	1.46442	-1.45796	-0.358064	-3.13571	#N/A	#N/A	#N/A	#N/A	#N/A	#N/A
CG2528	FBgn0032969	1.13158	0.761342	1.50181	-2.57209	-0.43344	-3.34725	-0.0759859	-0.0686046	-0.0833672	#DIV/0!	#DIV/0!	#DIV/0!
CG3483	FBgn0035005	1.1299	0.719838	1.53996	-2.23179	-0.202319	-4.1192	#N/A	#N/A	#N/A	#N/A	#N/A	#N/A
CG14864	FBgn0038311	1.12924	1.58402	0.674471	0.363376	-0.293665	0.0403854	#N/A	#N/A	#N/A	#N/A	#N/A	#N/A
CG43169	FBgn0262788	1.12794	0.835574	1.4203	-0.323548	-0.415823	-1.56579	#N/A	#N/A	#N/A	#N/A	#N/A	#N/A
CG16719	FBgn0036029	1.12758	0.999917	1.25524	0.283033	-0.161214	-0.409098	#N/A	#N/A	#N/A	#N/A	#N/A	#N/A
Hsc70-2	FBgn0001217	1.12716	0.835113	1.4192	-0.421083	-0.24816	-1.16549	-0.0526455	-0.0693616	-0.0359294	0.588274	0.0853209	-0.0621226
CG43750	FBgn0264081	1.12541	0.802469	1.44835	-1.16467	-0.560655	-2.84267	#N/A	#N/A	#N/A	#N/A	#N/A	#N/A
CG18231	FBgn0036796	1.12512	0.054583	2.19566	0.374336	1.30935	-0.716665	#N/A	#N/A	#N/A	#N/A	#N/A	#N/A
CG13280	FBgn0032609	1.12105	0.773072	1.46904	0.443779	-0.200031	-3.30476	#N/A	#N/A	#N/A	#N/A	#N/A	#N/A
CG30350	FBgn0050350	1.12008	0.739054	1.5011	-2.27339	-0.24056	-3.76052	#N/A	#N/A	#N/A	#N/A	#N/A	#N/A
CG6690	FBgn0038918	1.11931	-0.16674	2.40536	-0.743719	1.85146	-0.823798	0.894903	0.521998	1.26781	1.04166	0.313493	0.361511
CG43931	FBgn0264552	1.11923	0.186044	2.05241	-0.359246	1.1871	-0.680722	#N/A	#N/A	#N/A	#N/A	#N/A	#N/A
Sfp23F	FBgn0259949	1.11726	-0.245163	2.47968	-2.10407	0.780242	-1.29683	#DIV/0!	#DIV/0!	#DIV/0!	#DIV/0!	#DIV/0!	#DIV/0!
CG43059	FBgn0262361	1.11704	0.964594	1.26949	1.29109	-0.675311	-2.38505	#N/A	#N/A	#N/A	#N/A	#N/A	#N/A
CG5043	FBgn0032636	1.11627	0.532185	1.70036	-0.282211	-0.466658	-2.5871	#N/A	#N/A	#N/A	#N/A	#N/A	#N/A
CG42383	FBgn0259729	1.11602	0.863313	1.36872	-2.66448	-0.179034	-3.44747	#N/A	#N/A	#N/A	#N/A	#N/A	#N/A
CG32713	FBgn0052713	1.11576	0.76963	1.46188	-0.385024	-0.363057	-2.93316	#N/A	#N/A	#N/A	#N/A	#N/A	#N/A
CG31913	FBgn0051913	1.11557	0.742672	1.48847	-1.37262	-0.13694	-2.77029	#N/A	#N/A	#N/A	#N/A	#N/A	#N/A
gskt	FBgn0046332	1.11286	0.708203	1.51752	-1.70748	-0.449016	-2.89136	0.0420891	0.026423	0.0577552	-0.0110092	0.0376106	-0.0143825
CG9589	FBgn0038361	1.11284	0.852375	1.37331	-0.337953	-0.211234	-2.12475	#N/A	#N/A	#N/A	#N/A	#N/A	#N/A
CG15631	FBgn0031626	1.11281	0.7329	1.49272	-2.17396	-0.280353	-3.25005	#N/A	#N/A	#N/A	#N/A	#N/A	#N/A
CG13965	FBgn0032834	1.11272	0.571714	1.65372	0.0042939	0.197969	-0.113705	#N/A	#N/A	#N/A	#N/A	#N/A	#N/A
CG15641	FBgn0030643	1.11242	-0.122458	2.3473	-0.0682408	0.887389	-1.13127	#N/A	#N/A	#N/A	#N/A	#N/A	#N/A
Prosbeta5R	FBgn0034842	1.11198	0.741161	1.4828	-2.11573	-0.531935	-3.78448	#N/A	#N/A	#N/A	#N/A	#N/A	#N/A
CG11068	FBgn0030536	1.11132	0.821575	1.40106	0.116771	-0.538818	-2.16584	#N/A	#N/A	#N/A	#N/A	#N/A	#N/A
CG12828	FBgn0033145	1.11025	-0.258015	2.47852	-0.360629	1.74598	-0.863493	#N/A	#N/A	#N/A	#N/A	#N/A	#N/A
Rpn12R	FBgn0036465	1.1093	0.805676	1.41293	-0.454957	-0.690541	-2.98851	#N/A	#N/A	#N/A	#N/A	#N/A	#N/A
CG17564	FBgn0032768	1.10489	0.726864	1.48291	-2.11515	-0.483172	-2.36682	#N/A	#N/A	#N/A	#N/A	#N/A	#N/A
CG5724	FBgn0038082	1.10362	0.968688	1.23855	-1.73241	-0.294125	-0.487494	0.617322	0.655925	0.578718	0.590289	-0.182325	-0.277684
CG13989	FBgn0031786	1.10343	0.814827	1.39203	-1.99238	-0.451816	-2.80003	#N/A	#N/A	#N/A	#N/A	#N/A	#N/A
CG10845	FBgn0039246	1.10321	0.663338	1.54308	-1.14979	-0.208512	-3.19773	#N/A	#N/A	#N/A	#N/A	#N/A	#N/A
Acp53C14c	FBgn0053530	1.10215	0.00922526	2.19508	-0.916684	0.395963	-1.35662	0.665386	0.440437	0.890335	0.529567	0.0702269	-0.116605
Acyp	FBgn0025115	1.10169	0.826776	1.3766	-0.455819	-0.264587	-3.21336	#N/A	#N/A	#N/A	#N/A	#N/A	#N/A
CG9550	FBgn0031826	1.10056	0.701792	1.49934	-1.45379	-0.354029	-2.57023	#N/A	#N/A	#N/A	#N/A	#N/A	#N/A
CG10822	FBgn0034478	1.09945	0.723821	1.47507	-0.58913	-0.295421	-2.93444	#N/A	#N/A	#N/A	#N/A	#N/A	#N/A
CG12506	FBgn0031276	1.09865	0.797226	1.40008	1.44143	-0.195587	-1.3882	#N/A	#N/A	#N/A	#N/A	#N/A	#N/A
CG42810	FBgn0261992	1.09781	0.822649	1.37297	-0.981461	-0.444808	-2.28685	#N/A	#N/A	#N/A	#N/A	#N/A	#N/A
CR43684	FBgn0263767	1.09725	0.142152	2.05234	-1.1026	1.71996	-0.209339	#N/A	#N/A	#N/A	#N/A	#N/A	#N/A
CR43634	FBgn0263625	1.09668	-0.170368	2.36372	-0.351048	0.815709	-0.923376	#N/A	#N/A	#N/A	#N/A	#N/A	#N/A
CG12983	FBgn0037040	1.09657	0.649233	1.5439	-1.80455	-0.274136	-3.23384	#N/A	#N/A	#N/A	#N/A	#N/A	#N/A
Sfp33A2	FBgn0259963	1.09621	0.0644108	2.12802	-0.177414	0.703841	-0.996171	0.910049	0.607437	1.21266	#DIV/0!	#DIV/0!	#DIV/0!
CG34041	FBgn0054041	1.09612	-0.0342944	2.22653	-1.033	1.16072	-1.17807	#N/A	#N/A	#N/A	#N/A	#N/A	#N/A
CG13032	FBgn0036652	1.09381	0.63651	1.55111	-0.359481	-0.333617	-2.78793	#N/A	#N/A	#N/A	#N/A	#N/A	#N/A
CG13544	FBgn0034826	1.09154	0.701321	1.48177	-2.33016	-0.534267	-2.81746	#N/A	#N/A	#N/A	#N/A	#N/A	#N/A
LysD	FBgn0004427	1.09017	1.07196	1.10838	-1.93487	-0.179543	-0.106109	#N/A	#N/A	#N/A	#N/A	#N/A	#N/A
CG42855	FBgn0262102	1.08953	0.624521	1.55454	-0.482596	-0.541761	-3.12632	#N/A	#N/A	#N/A	#N/A	#N/A	#N/A
CG8138	FBgn0038122	1.08776	0.70498	1.47054	-0.738723	-0.452591	-2.76324	#N/A	#N/A	#N/A	#N/A	#N/A	#N/A
CG9970	FBgn0035380	1.08754	0.679478	1.49561	-1.24993	-0.433289	-4.2077	#N/A	#N/A	#N/A	#N/A	#N/A	#N/A
CG7794	FBgn0038565	1.08735	0.736832	1.43786	-0.670477	-0.218349	-1.87886	#N/A	#N/A	#N/A	#N/A	#N/A	#N/A
CG6470	FBgn0030933	1.08721	0.487833	1.68658	-0.220363	-0.0690253	-1.4985	#N/A	#N/A	#N/A	#N/A	#N/A	#N/A
CG16964	FBgn0032385	1.08703	0.7619	1.41217	-1.89061	-0.663153	-3.73742	#N/A	#N/A	#N/A	#N/A	#N/A	#N/A
CG13725	FBgn0036708	1.0867	0.733995	1.4394	-3.14192	-0.509333	-3.50379	#N/A	#N/A	#N/A	#N/A	#N/A	#N/A
gammaTry	FBgn0010359	1.08501	0.783919	1.38611	-0.773562	-0.0379879	-0.128828	#N/A	#N/A	#N/A	#N/A	#N/A	#N/A
CG32061	FBgn0052061	1.08491	0.893136	1.27669	-3.19776	-0.562377	-3.48862	#N/A	#N/A	#N/A	#N/A	#N/A	#N/A
CG31952	FBgn0051952	1.08468	0.813029	1.35634	-2.81937	-0.414383	-2.98225	#N/A	#N/A	#N/A	#N/A	#N/A	#N/A
CG30065	FBgn0050065	1.08388	0.723219	1.44454	0.578121	-0.891447	-2.40129	#N/A	#N/A	#N/A	#N/A	#N/A	#N/A
CR43633	FBgn0263624	1.08292	-0.04747	2.21331	-0.759169	-0.213916	-1.42781	#N/A	#N/A	#N/A	#N/A	#N/A	#N/A
Tengl3	FBgn0051679	1.0815	0.732131	1.43086	-1.71508	-0.495855	-3.11707	#N/A	#N/A	#N/A	#N/A	#N/A	#N/A
CG12448	FBgn0028857	1.0814	0.757857	1.40493	-1.85947	-0.578335	-2.83334	#N/A	#N/A	#N/A	#N/A	#N/A	#N/A
CG3092	FBgn0034835	1.08099	0.719746	1.44224	-2.57901	-0.238641	-3.62121	#N/A	#N/A	#N/A	#N/A	#N/A	#N/A
CG32847	FBgn0052847	1.07768	0.881058	1.2743	-1.39517	-0.245147	-1.94348	#N/A	#N/A	#N/A	#N/A	#N/A	#N/A
CG7366	FBgn0035855	1.07668	0.786753	1.36661	-0.358729	-0.556024	-2.10952	-0.0208351	0.328093	-0.369763	0.304899	0.297151	1.00673
CG11854	FBgn0039299	1.0766	1.52552	0.627668	1.10359	0.410361	0.528089	#N/A	#N/A	#N/A	#N/A	#N/A	#N/A
CG5561	FBgn0031333	1.07651	0.885097	1.26792	-1.32902	-0.798812	-2.79439	#N/A	#N/A	#N/A	#N/A	#N/A	#N/A
CG5432	FBgn0039425	1.07416	0.680196	1.46812	-0.229597	-0.369183	-3.04124	1.25549	1.05972	1.45126	-4.51994	-2.34854	-2.64544
CG32236	FBgn0046793	1.07394	0.633667	1.51422	-1.77463	-0.38213	-3.86866	#N/A	#N/A	#N/A	#N/A	#N/A	#N/A
CG43077	FBgn0262487	1.0729	0.623886	1.52191	1.36909	-0.49124	-3.25697	#N/A	#N/A	#N/A	#N/A	#N/A	#N/A
Sfp24C1	FBgn0259956	1.07279	-0.302295	2.44787	-0.631875	0.92148	-0.870129	1.3737	1.24608	1.50132	#DIV/0!	#DIV/0!	#DIV/0!
CG30369	FBgn0050369	1.07236	0.774323	1.37039	-1.4873	-0.850114	-3.28478	#N/A	#N/A	#N/A	#N/A	#N/A	#N/A
CG11929	FBgn0031620	1.07088	0.724922	1.41684	0.133654	-0.348031	-3.28289	#DIV/0!	#DIV/0!	#DIV/0!	#DIV/0!	#DIV/0!	#DIV/0!
CG15258	FBgn0032563	1.07009	0.72945	1.41072	-2.22958	-0.569039	-3.13696	#N/A	#N/A	#N/A	#N/A	#N/A	#N/A
CG17375	FBgn0031861	1.06833	0.727743	1.40891	-0.89167	-0.552405	-2.64734	#N/A	#N/A	#N/A	#N/A	#N/A	#N/A
CG32199	FBgn0052199	1.06821	-0.0167926	2.1532	0.307452	1.92925	-0.582456	#N/A	#N/A	#N/A	#N/A	#N/A	#N/A
CG9664	FBgn0031515	1.06749	1.3198	0.815178	0.0205292	-0.0993892	0.0233105	-0.484662	-0.460194	-0.50913	0.136442	0.019664	0.159543
CG16884	FBgn0028544	1.06737	1.34546	0.789277	-1.34957	-1.49013	-1.00819	0.792374	0.696818	0.887929	-0.176145	-0.0660453	-0.207064
CG3306	FBgn0036016	1.06704	0.664602	1.46949	-1.35533	-0.332693	-2.80748	#N/A	#N/A	#N/A	#N/A	#N/A	#N/A
CG12111	FBgn0030050	1.06702	0.854501	1.27954	0.197874	-0.582895	-2.09958	#N/A	#N/A	#N/A	#N/A	#N/A	#N/A
CG2871	FBgn0029725	1.06655	0.635687	1.4974	-0.787961	-0.53384	-3.38461	#N/A	#N/A	#N/A	#N/A	#N/A	#N/A
CG9173	FBgn0035218	1.06603	0.689033	1.44302	-1.94935	-0.313626	-3.66187	#N/A	#N/A	#N/A	#N/A	#N/A	#N/A
CG31773	FBgn0051773	1.06429	0.546626	1.58196	-1.75181	-0.340214	-3.16545	#N/A	#N/A	#N/A	#N/A	#N/A	#N/A
CG34130	FBgn0083966	1.06409	-0.0312421	2.15943	-0.461564	1.17167	-0.954667	0.738067	0.428592	1.04754	0.878433	0.599869	0.659054
CG6971	FBgn0037962	1.06386	0.715404	1.41231	-0.469846	-0.42414	-2.02963	1.23706	1.0381	1.43602	#DIV/0!	#DIV/0!	#DIV/0!
CG15577	FBgn0040904	1.05856	0.722986	1.39414	-1.07221	-0.387079	-3.00121	#N/A	#N/A	#N/A	#N/A	#N/A	#N/A
CG5398	FBgn0034882	1.05819	0.548616	1.56776	-1.33358	0.0185272	-2.50881	#N/A	#N/A	#N/A	#N/A	#N/A	#N/A
CG43106	FBgn0262566	1.05797	0.65959	1.45635	-2.2821	-0.558395	-3.14856	#N/A	#N/A	#N/A	#N/A	#N/A	#N/A
CG4995	FBgn0032219	1.05729	0.839529	1.27505	0.212537	-0.284726	-1.0173	#N/A	#N/A	#N/A	#N/A	#N/A	#N/A
CG31230	FBgn0051230	1.05678	0.851625	1.26194	0.225206	-0.751144	-1.62898	#N/A	#N/A	#N/A	#N/A	#N/A	#N/A
CG7742	FBgn0031690	1.05672	0.554911	1.55852	-0.453117	-0.217529	-0.958101	#N/A	#N/A	#N/A	#N/A	#N/A	#N/A
CG32313	FBgn0052313	1.05167	0.756144	1.34719	1.61327	-0.0282943	-0.884043	#N/A	#N/A	#N/A	#N/A	#N/A	#N/A
CG11145	FBgn0033168	1.05108	0.636552	1.46561	-0.0730683	-0.182337	-3.19573	#N/A	#N/A	#N/A	#N/A	#N/A	#N/A
CG30025	FBgn0050025	1.05012	0.723065	1.37717	-0.792118	-0.0426951	-0.128345	#N/A	#N/A	#N/A	#N/A	#N/A	#N/A
Tsp39D	FBgn0032943	1.04909	1.20353	0.894641	0.0746753	-0.0700503	0.025075	#N/A	#N/A	#N/A	#N/A	#N/A	#N/A
fig	FBgn0039694	1.04849	0.789794	1.30719	0.0906864	-0.134546	-1.74396	#N/A	#N/A	#N/A	#N/A	#N/A	#N/A
CG5906	FBgn0036217	1.04813	0.715739	1.38052	-1.47331	-0.254835	-3.79931	#N/A	#N/A	#N/A	#N/A	#N/A	#N/A
CG31806	FBgn0051806	1.04757	0.652949	1.4422	-1.16107	-0.277004	-2.15352	#N/A	#N/A	#N/A	#N/A	#N/A	#N/A
CG13405	FBgn0035097	1.04687	0.811117	1.28262	-1.68247	-0.778615	-2.98	#N/A	#N/A	#N/A	#N/A	#N/A	#N/A
CG31882	FBgn0051882	1.04666	0.666091	1.42723	-0.867275	-0.156948	-3.47636	#N/A	#N/A	#N/A	#N/A	#N/A	#N/A
CG32181	FBgn0052181	1.0461	0.579784	1.51243	-0.146055	-0.0818723	-2.02779	#N/A	#N/A	#N/A	#N/A	#N/A	#N/A
CG11828	FBgn0039616	1.04484	-0.00445318	2.09414	0.0762006	1.23921	-0.650894	#N/A	#N/A	#N/A	#N/A	#N/A	#N/A
CG7196	FBgn0031944	1.04447	0.64138	1.44757	-0.211117	-0.322748	-1.51049	#N/A	#N/A	#N/A	#N/A	#N/A	#N/A
CG30270	FBgn0061435	1.04324	0.705414	1.38107	-1.62471	-0.57428	-2.8775	#N/A	#N/A	#N/A	#N/A	#N/A	#N/A
CG15403	FBgn0031504	1.04242	0.703099	1.38174	-0.608023	-0.511862	-2.43917	#N/A	#N/A	#N/A	#N/A	#N/A	#N/A
PH4alphaNE2	FBgn0039783	1.04219	-0.0869991	2.17139	-0.689549	1.55955	-0.84936	#N/A	#N/A	#N/A	#N/A	#N/A	#N/A
CG14607	FBgn0037488	1.04158	0.656275	1.42688	-0.809192	-0.203007	-0.238924	0.490424	0.359025	0.621822	0.110654	0.641353	0.181799
CG3788	FBgn0034800	1.0407	0.760655	1.32074	-0.248198	-0.246781	-1.75498	0.0301423	0.149861	-0.0895765	-0.155976	0.124459	0.487491
Mst89B	FBgn0020399	1.04042	0.782885	1.29795	-0.282735	-0.290077	-2.44617	#N/A	#N/A	#N/A	#N/A	#N/A	#N/A
Adgf-E	FBgn0033952	1.0399	0.754967	1.32484	-2.56337	-0.348824	-4.23488	#N/A	#N/A	#N/A	#N/A	#N/A	#N/A
CG31533	FBgn0051533	1.03941	0.60922	1.4696	-2.1793	-0.470476	-4.37457	#N/A	#N/A	#N/A	#N/A	#N/A	#N/A
glob2	FBgn0250846	1.03909	0.743915	1.33427	-2.01244	-0.738815	-3.11967	#N/A	#N/A	#N/A	#N/A	#N/A	#N/A
CG13759	FBgn0040376	1.03745	0.26538	1.80951	-0.119414	0.212146	-0.616721	0.417232	0.319549	0.514915	#DIV/0!	#DIV/0!	#DIV/0!
Vha68-3	FBgn0032464	1.03667	0.583552	1.4898	-0.81785	-0.0548411	-3.36823	#N/A	#N/A	#N/A	#N/A	#N/A	#N/A
CG31161	FBgn0051161	1.03645	0.646742	1.42615	-0.16171	-0.201509	-1.20698	#N/A	#N/A	#N/A	#N/A	#N/A	#N/A
CG14609	FBgn0037483	1.03603	0.690639	1.38141	-0.7642	-0.460409	-2.44336	0.820289	0.655117	0.985461	#DIV/0!	#DIV/0!	#DIV/0!
CG4701	FBgn0028868	1.03491	0.635357	1.43446	-1.51546	-0.24845	-3.82901	-0.176207	-0.178935	-0.173478	#DIV/0!	#DIV/0!	#DIV/0!
CG16741	FBgn0042198	1.03311	0.873446	1.19277	-1.20081	-0.560666	-2.89499	#N/A	#N/A	#N/A	#N/A	#N/A	#N/A
CG15199	FBgn0030270	1.03288	1.25138	0.814384	-0.335526	-0.0557018	0.0309185	-0.157995	-0.134677	-0.181313	#DIV/0!	#DIV/0!	#DIV/0!
CG14154	FBgn0036093	1.0318	0.685538	1.37806	-0.473871	-0.502809	-1.68671	#N/A	#N/A	#N/A	#N/A	#N/A	#N/A
CG31816	FBgn0051816	1.03169	0.919232	1.14414	-0.850839	-0.291697	-2.14227	#N/A	#N/A	#N/A	#N/A	#N/A	#N/A
GstE7	FBgn0063493	1.03063	0.923875	1.13738	-0.0429228	0.0623765	0.110877	0.0383662	0.016555	0.0601773	0.273255	0.509872	0.993275
CG30429	FBgn0050429	1.02972	0.640637	1.4188	-2.01724	-0.296838	-3.19964	#N/A	#N/A	#N/A	#N/A	#N/A	#N/A
ttm3	FBgn0032971	1.0295	0.599428	1.45957	-1.18203	-0.190327	-3.84209	-0.20651	0.0606096	-0.47363	#DIV/0!	#DIV/0!	#DIV/0!
Sfp33A4	FBgn0261056	1.02794	-0.116302	2.17218	-0.743005	-0.382285	-1.3951	#N/A	#N/A	#N/A	#N/A	#N/A	#N/A
CG13244	FBgn0032577	1.02663	0.701289	1.35197	-1.04742	-0.664391	-2.3906	#N/A	#N/A	#N/A	#N/A	#N/A	#N/A
Tim13	FBgn0036204	1.0263	0.838929	1.21367	-1.42391	-0.548718	-2.13394	#N/A	#N/A	#N/A	#N/A	#N/A	#N/A
Ser6	FBgn0011834	1.02581	0.699202	1.35241	-0.457816	0.14134	-0.104418	0.124472	0.205457	0.0434874	-1.45781	0.746136	0.992436
CG10589	FBgn0037035	1.02548	0.607756	1.4432	-0.700451	-0.405897	-2.07694	#N/A	#N/A	#N/A	#N/A	#N/A	#N/A
Sfp36F	FBgn0261057	1.02476	0.0929099	1.95661	-0.451356	0.043643	-1.41606	#N/A	#N/A	#N/A	#N/A	#N/A	#N/A
osm-1	FBgn0035317	1.02418	0.86378	1.18459	-0.88457	-1.14913	-1.04355	#N/A	#N/A	#N/A	#N/A	#N/A	#N/A
CG14605	FBgn0037486	1.02205	0.642532	1.40157	-1.88721	-0.302175	-3.26597	#N/A	#N/A	#N/A	#N/A	#N/A	#N/A
CG7094	FBgn0032650	1.02134	0.732129	1.31055	-1.38802	-0.667723	-3.3931	#N/A	#N/A	#N/A	#N/A	#N/A	#N/A
Crtp	FBgn0029501	1.02104	0.587793	1.45428	-1.89424	-0.212667	-3.3147	#N/A	#N/A	#N/A	#N/A	#N/A	#N/A
CG31244	FBgn0051244	1.01873	0.575391	1.46207	-1.84756	-0.321555	-2.97404	#N/A	#N/A	#N/A	#N/A	#N/A	#N/A
CG4988	FBgn0032372	1.0186	1.18274	0.854456	-1.3183	-0.370836	-3.73881	#N/A	#N/A	#N/A	#N/A	#N/A	#N/A
CG11125	FBgn0033174	1.01696	0.690401	1.34352	0.242542	0.152912	-0.243137	#N/A	#N/A	#N/A	#N/A	#N/A	#N/A
whip	FBgn0250827	1.01687	0.521156	1.51259	-1.64991	-0.280388	-2.64928	#N/A	#N/A	#N/A	#N/A	#N/A	#N/A
Pof	FBgn0035047	1.01548	0.657438	1.37352	-0.0643709	-0.09365	-0.579242	0.561397	0.564253	0.558542	#DIV/0!	#DIV/0!	#DIV/0!
CG5840	FBgn0038516	1.01528	0.964237	1.06632	-0.0469486	0.0697525	0.130143	0.95251	0.88833	1.01669	0.242842	0.503408	0.543311
CG11878	FBgn0039310	1.01523	1.51417	0.516285	-0.190973	0.0658754	0.161165	-0.148871	-0.016521	-0.28122	-1.07561	0.477969	0.399158
CG34173	FBgn0085202	1.01458	0.798607	1.23055	-0.872252	-0.406763	-2.61652	#N/A	#N/A	#N/A	#N/A	#N/A	#N/A
CG4712	FBgn0033818	1.01438	0.557938	1.47082	-0.835625	-0.382906	-2.78827	#N/A	#N/A	#N/A	#N/A	#N/A	#N/A
gom	FBgn0029084	1.0136	0.706779	1.32041	-0.23491	-0.451121	-2.81535	1.08986	1.04506	1.13465	#DIV/0!	#DIV/0!	#DIV/0!
CG5755	FBgn0032664	1.01297	0.577029	1.44891	-1.54465	-0.51411	-3.38874	#N/A	#N/A	#N/A	#N/A	#N/A	#N/A
robl37BC	FBgn0028569	1.0126	0.754227	1.27097	-0.441921	-0.507485	-2.46065	#N/A	#N/A	#N/A	#N/A	#N/A	#N/A
CG42529	FBgn0260434	1.01164	0.616126	1.40715	-2.49503	-0.00697076	-2.81897	#N/A	#N/A	#N/A	#N/A	#N/A	#N/A
CG6629	FBgn0037860	1.0116	0.560191	1.46302	-1.66723	-0.160118	-3.21413	#N/A	#N/A	#N/A	#N/A	#N/A	#N/A
CR43152	FBgn0262682	1.0096	0.986361	1.03283	0.794098	-0.33255	-0.801617	#N/A	#N/A	#N/A	#N/A	#N/A	#N/A
CG16716	FBgn0034459	1.00954	0.632249	1.38684	-1.66517	-0.215429	-3.38476	#N/A	#N/A	#N/A	#N/A	#N/A	#N/A
CR43142	FBgn0262616	1.0084	0.894333	1.12247	-0.521412	-0.660842	-2.38236	#N/A	#N/A	#N/A	#N/A	#N/A	#N/A
CG42869	FBgn0262143	1.00761	-0.163412	2.17863	-1.46983	0.0277928	-1.25597	#N/A	#N/A	#N/A	#N/A	#N/A	#N/A
CG7140	FBgn0037147	1.00748	0.592073	1.42289	-1.29074	-0.241317	-2.19489	#N/A	#N/A	#N/A	#N/A	#N/A	#N/A
CG10029	FBgn0037498	1.00565	0.00191643	2.00939	-0.0100522	1.82547	-0.7603	0.854903	0.378828	1.33098	#DIV/0!	#DIV/0!	#DIV/0!
CG42848	FBgn0262095	1.00543	0.606789	1.40408	-1.94547	-0.260089	-2.59231	#N/A	#N/A	#N/A	#N/A	#N/A	#N/A
Tektin-A	FBgn0028902	1.00471	0.523229	1.48619	-2.47678	-0.260033	-3.8421	0.8929	0.827752	0.958047	#DIV/0!	#DIV/0!	#DIV/0!
Mis12	FBgn0035725	1.00438	1.22225	0.786515	0.216804	0.134688	0.234325	#N/A	#N/A	#N/A	#N/A	#N/A	#N/A
CR32835	FBgn0052835	1.00438	0.587647	1.4211	-1.82171	-0.839835	-3.07462	#N/A	#N/A	#N/A	#N/A	#N/A	#N/A
CG6279	FBgn0036125	1.00386	0.514112	1.49361	0.0819641	-0.0221315	-1.26501	#N/A	#N/A	#N/A	#N/A	#N/A	#N/A
CG43183	FBgn0262812	1.00369	0.738067	1.26932	-1.04164	-0.947773	-3.05759	#N/A	#N/A	#N/A	#N/A	#N/A	#N/A
CG14316	FBgn0038567	1.00266	0.552161	1.45316	-0.128202	-0.273869	-2.79816	#N/A	#N/A	#N/A	#N/A	#N/A	#N/A
CG31010	FBgn0051010	1.00184	0.662583	1.34111	-2.92651	-0.436653	-4.01221	#N/A	#N/A	#N/A	#N/A	#N/A	#N/A
CG5103	FBgn0036784	1.00117	0.632916	1.36943	-2.29078	-0.165872	-3.97837	-0.13322	-0.215449	-0.050991	-0.672627	0.0123076	0.163257
Ubc84D	FBgn0017456	1.00098	0.750383	1.25157	-0.140376	-0.413011	-1.11457	#N/A	#N/A	#N/A	#N/A	#N/A	#N/A
CG4377	FBgn0034664	1.0008	1.09376	0.907848	-0.158653	0.0817483	0.0725356	1.56154	1.50228	1.6208	-0.232047	0.352513	-0.0838749
Gld2	FBgn0038934	0.998573	0.604505	1.39264	0.143854	-0.467739	-2.89383	#N/A	#N/A	#N/A	#N/A	#N/A	#N/A
fln	FBgn0005633	0.996533	0.652905	1.34016	-0.580776	-0.236822	-0.377879	-0.175661	-0.10535	-0.245973	-0.161169	-0.183219	-0.0210832
CG8349	FBgn0032003	0.996271	0.578724	1.41382	-0.84285	-0.523486	-2.8979	#N/A	#N/A	#N/A	#N/A	#N/A	#N/A
CG15572	FBgn0029702	0.99624	0.665714	1.32677	-0.999462	-0.37562	-3.78916	#N/A	#N/A	#N/A	#N/A	#N/A	#N/A
Cyp6d5	FBgn0038194	0.995968	1.05591	0.936026	-0.0562538	0.0110651	0.0321165	1.03724	1.05939	1.0151	-0.0357008	0.24563	-0.221548
CG13946	FBgn0040725	0.995636	0.43577	1.5555	2.27821	-0.63948	-0.896536	#N/A	#N/A	#N/A	#N/A	#N/A	#N/A
CG34292	FBgn0085321	0.993954	0.560925	1.42698	-1.97119	-0.35583	-2.98657	#N/A	#N/A	#N/A	#N/A	#N/A	#N/A
CG31546	FBgn0051546	0.993812	0.647799	1.33983	-0.579373	-0.206695	-1.54141	#N/A	#N/A	#N/A	#N/A	#N/A	#N/A
Rtnl2	FBgn0015831	0.992256	0.448161	1.53635	0.188776	-0.365341	-2.11805	#N/A	#N/A	#N/A	#N/A	#N/A	#N/A
CG14508	FBgn0039651	0.991806	0.692712	1.2909	-0.263495	-0.262799	-1.25074	0.873977	0.816736	0.931217	#DIV/0!	#DIV/0!	#DIV/0!
Pdh	FBgn0011693	0.989791	0.852867	1.12672	-0.451266	-0.937895	-0.450102	0.558018	0.5584	0.557637	-0.0826145	-0.152947	0.282184
CG12620	FBgn0032626	0.989528	0.731812	1.24724	-2.34077	-0.675074	-3.2353	#N/A	#N/A	#N/A	#N/A	#N/A	#N/A
CG5388	FBgn0038944	0.989161	0.806558	1.17176	-0.806994	-0.546754	-3.70631	#N/A	#N/A	#N/A	#N/A	#N/A	#N/A
CG43069	FBgn0262479	0.986727	0.586029	1.38742	-0.119167	-0.568206	-2.20462	#N/A	#N/A	#N/A	#N/A	#N/A	#N/A
CG3687	FBgn0034097	0.986216	0.692441	1.27999	-1.01304	-0.528099	-2.54637	#N/A	#N/A	#N/A	#N/A	#N/A	#N/A
CG31105	FBgn0051105	0.985754	0.171489	1.80002	0.620354	0.413887	-0.609507	#N/A	#N/A	#N/A	#N/A	#N/A	#N/A
RpS19b	FBgn0039129	0.98518	0.699902	1.27046	1.13415	-0.708216	-1.9864	#N/A	#N/A	#N/A	#N/A	#N/A	#N/A
nmdyn-D7	FBgn0028997	0.982647	0.77931	1.18598	0.96321	-0.0564727	-0.631092	#N/A	#N/A	#N/A	#N/A	#N/A	#N/A
CG9392	FBgn0036895	0.980025	0.594722	1.36533	-0.820039	-0.189617	-2.52259	#N/A	#N/A	#N/A	#N/A	#N/A	#N/A
Mst36Fb	FBgn0261349	0.977742	0.747373	1.20811	-0.389786	-0.260545	-0.747275	#N/A	#N/A	#N/A	#N/A	#N/A	#N/A
CG14101	FBgn0036905	0.975568	0.5753	1.37584	-1.94985	-0.175387	-3.31082	#N/A	#N/A	#N/A	#N/A	#N/A	#N/A
CG13833	FBgn0039040	0.974485	0.938722	1.01025	-0.38138	-0.0765934	-0.060769	1.32004	1.18676	1.45331	0.47934	0.863551	0.290382
CG6481	FBgn0030936	0.973669	0.619898	1.32744	-0.356811	-0.505505	-2.15849	#N/A	#N/A	#N/A	#N/A	#N/A	#N/A
CG43108	FBgn0262568	0.973429	0.811573	1.13529	-0.693779	-0.695506	-2.66502	#N/A	#N/A	#N/A	#N/A	#N/A	#N/A
CG15296	FBgn0030215	0.972795	0.643458	1.30213	-1.96623	-0.515842	-3.17333	#N/A	#N/A	#N/A	#N/A	#N/A	#N/A
sgl	FBgn0261445	0.971914	1.3108	0.633026	0.0214392	0.0252213	0.0672919	0.214341	0.39566	0.0330217	-0.262721	0.345316	0.350224
CG31735	FBgn0051735	0.971547	0.493348	1.44975	-1.75496	-0.050882	-3.14849	#N/A	#N/A	#N/A	#N/A	#N/A	#N/A
CG3253	FBgn0041706	0.971503	1.9289	0.0141098	0.102967	0.286392	0.397973	#N/A	#N/A	#N/A	#N/A	#N/A	#N/A
CG11663	FBgn0029539	0.971393	0.603935	1.33885	-1.5665	-0.493198	-3.57387	#N/A	#N/A	#N/A	#N/A	#N/A	#N/A
CG30031	FBgn0050031	0.97123	0.642747	1.29971	-0.862488	-0.051692	-0.126629	#N/A	#N/A	#N/A	#N/A	#N/A	#N/A
CG18568	FBgn0033888	0.97066	0.581449	1.35987	-0.67922	-0.563289	-1.64526	#N/A	#N/A	#N/A	#N/A	#N/A	#N/A
CG11608	FBgn0038069	0.969004	0.00755657	1.93045	-1.38814	1.42907	-0.955611	0.64703	0.335359	0.958701	0.50933	0.154751	-0.15083
CG13539	FBgn0034833	0.968771	0.667364	1.27018	-1.10835	-0.261919	-2.78179	#N/A	#N/A	#N/A	#N/A	#N/A	#N/A
CG4681	FBgn0069913	0.967861	0.542837	1.39289	-0.305166	-0.167524	-1.75849	#N/A	#N/A	#N/A	#N/A	#N/A	#N/A
CG4594	FBgn0032161	0.967599	1.09542	0.839783	0.151589	0.102163	0.204171	1.33434	1.27672	1.39195	-0.096841	0.204412	0.301895
CG12289	FBgn0036160	0.967393	0.588484	1.3463	-3.18314	-0.33951	-3.95114	#N/A	#N/A	#N/A	#N/A	#N/A	#N/A
CG43130	FBgn0262604	0.9653	0.822695	1.10791	0.670157	0.0630429	-0.7815	#N/A	#N/A	#N/A	#N/A	#N/A	#N/A
CG31327	FBgn0051327	0.965202	0.595724	1.33468	-1.22933	-0.413231	-4.71328	#N/A	#N/A	#N/A	#N/A	#N/A	#N/A
MtnD	FBgn0053192	0.963312	0.788179	1.13845	0.0907583	0.152604	0.0753775	#N/A	#N/A	#N/A	#N/A	#N/A	#N/A
CG11864	FBgn0028944	0.962022	0.0691444	1.8549	0.222426	1.01995	-1.05152	#N/A	#N/A	#N/A	#N/A	#N/A	#N/A
CG3906	FBgn0034871	0.961748	1.66696	0.256533	-0.379918	-0.014287	0.153411	#N/A	#N/A	#N/A	#N/A	#N/A	#N/A
CG42758	FBgn0261816	0.961727	0.461109	1.46234	-0.975181	-0.0284952	-2.31506	#N/A	#N/A	#N/A	#N/A	#N/A	#N/A
CG34425	FBgn0085454	0.961713	0.558599	1.36483	-1.34009	-0.449319	-3.34629	#N/A	#N/A	#N/A	#N/A	#N/A	#N/A
CG9360	FBgn0030332	0.960639	1.10654	0.814737	-0.12731	-0.0720119	-0.035396	0.863773	1.02492	0.702623	0.0671097	0.0246276	-0.23165
CG6138	FBgn0032268	0.960464	0.478596	1.44233	-2.49878	-0.0664458	-3.62201	#N/A	#N/A	#N/A	#N/A	#N/A	#N/A
CG33189	FBgn0053189	0.960271	0.882457	1.03808	0.161925	-0.0265827	-0.284144	#N/A	#N/A	#N/A	#N/A	#N/A	#N/A
CG33511	FBgn0053511	0.960006	1.63824	0.281772	-0.408822	0.0903377	0.633369	#N/A	#N/A	#N/A	#N/A	#N/A	#N/A
CG5155	FBgn0031905	0.957534	0.669251	1.24582	-0.0885108	-0.632444	-2.43155	#N/A	#N/A	#N/A	#N/A	#N/A	#N/A
CG14717	FBgn0037938	0.95752	0.745796	1.16924	-1.07348	-0.643878	-2.69071	#N/A	#N/A	#N/A	#N/A	#N/A	#N/A
CG6036	FBgn0039421	0.957515	0.719861	1.19517	-1.15971	-0.539305	-2.47421	#N/A	#N/A	#N/A	#N/A	#N/A	#N/A
CG31674	FBgn0051674	0.957262	0.92757	0.986954	-0.151817	0.0307455	0.129025	0.460001	0.462478	0.457523	-0.106382	0.438261	0.752395
CG7707	FBgn0036703	0.955246	0.531269	1.37922	-0.839641	-0.462497	-2.86801	#N/A	#N/A	#N/A	#N/A	#N/A	#N/A
CG43321	FBgn0263026	0.955144	0.409736	1.50055	-0.896074	0.111044	-2.89762	#N/A	#N/A	#N/A	#N/A	#N/A	#N/A
Tektin-C	FBgn0035638	0.954943	0.563155	1.34673	-0.196088	-0.0671243	-1.30332	1.47636	1.27465	1.67806	#DIV/0!	#DIV/0!	#DIV/0!
CG32833	FBgn0052833	0.954796	0.0218084	1.88778	-0.613559	1.67133	-0.98907	1.14365	0.558123	1.72917	1.27054	0.524641	0.0172014
Cyp4e3	FBgn0015035	0.95466	0.535755	1.37356	0.315953	0.183206	0.386108	1.02502	0.958101	1.09194	#DIV/0!	#DIV/0!	#DIV/0!
CG10202	FBgn0033969	0.951623	0.61346	1.28979	-2.27732	-0.291233	-3.82313	1.31744	1.17603	1.45884	#DIV/0!	#DIV/0!	#DIV/0!
Pif2	FBgn0046873	0.951298	0.42913	1.47347	-1.35551	-0.434924	-2.86815	#N/A	#N/A	#N/A	#N/A	#N/A	#N/A
CG14676	FBgn0037388	0.951127	0.568799	1.33345	-0.161678	-0.115349	-1.95477	#N/A	#N/A	#N/A	#N/A	#N/A	#N/A
CG6485	FBgn0036706	0.951035	0.651071	1.251	-1.65579	-0.60956	-2.76051	#N/A	#N/A	#N/A	#N/A	#N/A	#N/A
Gal	FBgn0001089	0.948069	0.881593	1.01455	-0.847823	0.0737103	0.102367	0.924445	0.842989	1.0059	-0.0760744	0.239423	-0.219487
CG3927	FBgn0034739	0.947926	0.539934	1.35592	0.515663	-0.92738	-2.27063	0.0525538	0.118383	-0.0132749	#DIV/0!	#DIV/0!	#DIV/0!
CG43350	FBgn0263082	0.947713	-0.28633	2.18176	-0.792601	0.252393	-0.876439	#N/A	#N/A	#N/A	#N/A	#N/A	#N/A
CG18193	FBgn0037579	0.946214	0.674241	1.21819	-0.662127	-0.277951	-1.38915	#N/A	#N/A	#N/A	#N/A	#N/A	#N/A
CG3301	FBgn0038878	0.946163	0.629584	1.26274	-0.192381	-0.0530603	-0.0223858	1.09282	0.699066	1.48657	-0.129905	0.0513022	0.316772
CG43222	FBgn0262858	0.946131	0.665046	1.22722	-0.293528	-0.210547	-0.699192	#N/A	#N/A	#N/A	#N/A	#N/A	#N/A
wa-cup	FBgn0037502	0.944819	0.474822	1.41482	-1.97433	-0.205523	-3.27369	#N/A	#N/A	#N/A	#N/A	#N/A	#N/A
CG33704	FBgn0053704	0.942358	0.61806	1.26666	-0.738891	-0.432041	-2.80416	#N/A	#N/A	#N/A	#N/A	#N/A	#N/A
CG17856	FBgn0039576	0.941054	0.431048	1.45106	-1.3778	-0.0858052	-2.81707	0.15314	0.231849	0.0744299	-0.152057	-0.0983255	0.0937237
CG43145	FBgn0262621	0.938977	-0.281892	2.15985	-0.154097	-0.183001	-1.13813	0.906128	0.552629	1.25963	#DIV/0!	#DIV/0!	#DIV/0!
CG30355	FBgn0050355	0.938203	0.679422	1.19698	0.00132952	-0.132626	-0.765538	#N/A	#N/A	#N/A	#N/A	#N/A	#N/A
CG10750	FBgn0032769	0.938012	0.57482	1.3012	-0.840935	-0.669982	-2.84893	#N/A	#N/A	#N/A	#N/A	#N/A	#N/A
CG12992	FBgn0030846	0.937288	0.632783	1.24179	-0.0671467	-0.268175	-1.74154	#N/A	#N/A	#N/A	#N/A	#N/A	#N/A
lox2	FBgn0034660	0.935881	1.10086	0.770899	-1.04314	-0.66399	-0.543793	0.132046	0.0929997	0.171092	#DIV/0!	#DIV/0!	#DIV/0!
ttm2	FBgn0035124	0.935285	0.528218	1.34235	-0.923853	-0.0715055	-2.60349	#DIV/0!	#DIV/0!	#DIV/0!	#DIV/0!	#DIV/0!	#DIV/0!
CG43673	FBgn0263748	0.934585	1.66054	0.208635	-0.489891	-0.158919	0.0610466	#N/A	#N/A	#N/A	#N/A	#N/A	#N/A
CG3610	FBgn0038266	0.93366	0.501727	1.36559	-2.107	-0.427582	-2.92432	#N/A	#N/A	#N/A	#N/A	#N/A	#N/A
Ant2	FBgn0025111	0.932381	0.614204	1.25056	0.0926018	-0.164937	-0.859238	0.217815	0.330779	0.104851	0.00684157	-0.435368	-0.377091
CG12464	FBgn0033861	0.931871	0.643548	1.22019	-1.95899	-0.759303	-3.66209	#N/A	#N/A	#N/A	#N/A	#N/A	#N/A
fan	FBgn0028379	0.93098	0.494395	1.36757	-0.16348	-0.203593	-1.21632	#N/A	#N/A	#N/A	#N/A	#N/A	#N/A
CG15025	FBgn0038709	0.929629	0.537799	1.32146	-2.04826	-0.490233	-3.1258	#N/A	#N/A	#N/A	#N/A	#N/A	#N/A
CG6914	FBgn0037172	0.927519	0.753067	1.10197	-2.0907	-0.507174	-3.29063	#N/A	#N/A	#N/A	#N/A	#N/A	#N/A
Cpr47Ea	FBgn0033597	0.926785	0.426956	1.42661	-1.03147	-1.30998	-1.55188	0.359578	0.388568	0.330587	0.589205	0.368639	0.237644
CG32832	FBgn0052832	0.926706	0.421005	1.43241	-1.16543	0.0898819	-1.55784	#N/A	#N/A	#N/A	#N/A	#N/A	#N/A
comm2	FBgn0041160	0.925136	1.00864	0.84163	0.0647369	-0.020328	0.0485325	#N/A	#N/A	#N/A	#N/A	#N/A	#N/A
CG13471	FBgn0036443	0.92508	0.473752	1.37641	-0.327019	-0.209114	-2.4337	#N/A	#N/A	#N/A	#N/A	#N/A	#N/A
CG15800	FBgn0034904	0.924588	0.53462	1.31456	-1.09388	-0.0167424	-1.72555	#N/A	#N/A	#N/A	#N/A	#N/A	#N/A
Prosalpha6T	FBgn0032492	0.923327	0.504925	1.34173	-1.84264	-0.155956	-3.24074	#N/A	#N/A	#N/A	#N/A	#N/A	#N/A
CG6761	FBgn0036031	0.922989	0.751833	1.09414	0.117682	-0.327503	-0.850764	#N/A	#N/A	#N/A	#N/A	#N/A	#N/A
CG11977	FBgn0037650	0.922797	0.162828	1.68277	1.13525	0.417075	-0.582465	#N/A	#N/A	#N/A	#N/A	#N/A	#N/A
CG43799	FBgn0264343	0.921982	1.54389	0.300069	-0.291579	0.234309	1.18976	#N/A	#N/A	#N/A	#N/A	#N/A	#N/A
deltaTry	FBgn0010358	0.921571	0.671273	1.17187	-1.3069	-0.108798	-0.137795	#N/A	#N/A	#N/A	#N/A	#N/A	#N/A
CG13843	FBgn0038993	0.921379	0.521443	1.32132	0.127867	-0.0528704	-1.45492	#N/A	#N/A	#N/A	#N/A	#N/A	#N/A
CG5265	FBgn0038486	0.920729	0.527197	1.31426	-3.28223	-0.210452	-4.04687	0.148476	0.292608	0.00434487	#DIV/0!	#DIV/0!	#DIV/0!
CG15452	FBgn0031130	0.919701	0.693586	1.14582	-0.526963	-0.963503	-2.52861	#N/A	#N/A	#N/A	#N/A	#N/A	#N/A
CG34021	FBgn0054021	0.919315	0.65648	1.18215	-0.330884	-0.371312	-2.65424	#N/A	#N/A	#N/A	#N/A	#N/A	#N/A
CG15172	FBgn0032740	0.919159	0.66205	1.17627	-0.752221	-0.70902	-2.01817	#N/A	#N/A	#N/A	#N/A	#N/A	#N/A
CG9313	FBgn0034566	0.918775	0.569207	1.26834	-0.397984	-0.332383	-1.04691	#N/A	#N/A	#N/A	#N/A	#N/A	#N/A
CG16885	FBgn0032538	0.916818	1.04915	0.784481	-0.72043	-0.600653	-0.528363	1.06755	0.963879	1.17123	-0.0232683	-0.205368	-0.422093
CG31874	FBgn0051874	0.91567	0.572591	1.25875	0.36528	-0.310949	-1.68982	0.246392	0.432962	0.059821	-0.0416715	-0.306992	0.0441966
CG33322	FBgn0053322	0.914204	0.355381	1.47303	-1.65933	-0.151646	-2.75347	#N/A	#N/A	#N/A	#N/A	#N/A	#N/A
CG14668	FBgn0037320	0.913958	0.603976	1.22394	-1.68985	-0.498708	-2.97743	#N/A	#N/A	#N/A	#N/A	#N/A	#N/A
Fer3HCH	FBgn0030449	0.913892	0.796194	1.03159	-0.714903	-0.596022	-2.19778	#N/A	#N/A	#N/A	#N/A	#N/A	#N/A
CG42597	FBgn0260996	0.91365	0.521531	1.30577	-0.265953	-0.552749	-3.31063	#N/A	#N/A	#N/A	#N/A	#N/A	#N/A
Lip3	FBgn0023495	0.913422	0.644087	1.18276	-0.369082	0.563413	0.15951	#N/A	#N/A	#N/A	#N/A	#N/A	#N/A
CG17154	FBgn0036246	0.91186	0.654914	1.16881	-1.15459	-0.442248	-2.93471	#N/A	#N/A	#N/A	#N/A	#N/A	#N/A
CG4021	FBgn0034659	0.910719	0.570421	1.25102	-0.638635	-0.628432	-2.80469	0.0525538	0.118383	-0.0132749	-0.382622	0.0538632	0.28303
CG34012	FBgn0054012	0.91046	0.776382	1.04454	-0.129941	-0.209166	-2.11074	#N/A	#N/A	#N/A	#N/A	#N/A	#N/A
CG11697	FBgn0030313	0.90835	0.681441	1.13526	-0.919106	-0.614648	-2.44301	#N/A	#N/A	#N/A	#N/A	#N/A	#N/A
VhaM9.7-d	FBgn0038458	0.906862	0.715703	1.09802	-1.40221	-0.579086	-3.30856	#N/A	#N/A	#N/A	#N/A	#N/A	#N/A
CG15035	FBgn0029949	0.90581	0.698276	1.11334	-1.50839	-0.764053	-3.42764	#N/A	#N/A	#N/A	#N/A	#N/A	#N/A
CG15120	FBgn0034454	0.904464	1.28555	0.52338	-0.228868	0.142009	0.806316	#N/A	#N/A	#N/A	#N/A	#N/A	#N/A
CG31099	FBgn0051099	0.902592	0.604928	1.20026	-0.833368	-0.305425	-2.81161	#N/A	#N/A	#N/A	#N/A	#N/A	#N/A
CG10587	FBgn0037039	0.902351	0.0359699	1.76873	-0.321909	0.881539	-1.07327	0.466103	0.0425569	0.889649	#DIV/0!	#DIV/0!	#DIV/0!
CG14402	FBgn0032894	0.902253	0.559349	1.24516	-1.16895	-0.345045	-3.47835	#N/A	#N/A	#N/A	#N/A	#N/A	#N/A
CG17118	FBgn0032291	0.901913	0.532641	1.27118	-0.770005	-0.472617	-2.22355	#N/A	#N/A	#N/A	#N/A	#N/A	#N/A
CG15576	FBgn0029700	0.901208	0.528902	1.27351	-1.28943	-0.111329	-3.39678	#N/A	#N/A	#N/A	#N/A	#N/A	#N/A
CG1146	FBgn0035346	0.901084	0.552569	1.2496	0.0813957	-0.123708	-0.0966478	0.425289	0.435895	0.414683	#DIV/0!	#DIV/0!	#DIV/0!
CG31819	FBgn0028893	0.900769	0.534326	1.26721	-1.44048	-0.2955	-2.88884	#N/A	#N/A	#N/A	#N/A	#N/A	#N/A
CG6980	FBgn0039228	0.900535	0.566156	1.23491	-0.164066	-0.28398	-1.18882	#N/A	#N/A	#N/A	#N/A	#N/A	#N/A
CG1208	FBgn0037386	0.898306	0.794021	1.00259	-0.214365	-0.0762308	-0.140089	0.241375	0.254528	0.228223	-0.499268	-0.076175	-0.379075
CG42650	FBgn0261502	0.897549	0.53456	1.26054	-1.22733	-0.248792	-2.54601	#N/A	#N/A	#N/A	#N/A	#N/A	#N/A
CG15260	FBgn0028850	0.897336	0.538929	1.25574	-1.8584	-0.410341	-3.61158	#N/A	#N/A	#N/A	#N/A	#N/A	#N/A
CG3121	FBgn0034957	0.895795	0.577174	1.21442	-0.610266	-0.323513	-2.48863	#N/A	#N/A	#N/A	#N/A	#N/A	#N/A
CG32295	FBgn0260480	0.895419	0.621885	1.16895	0.792207	-0.400997	-1.46239	#N/A	#N/A	#N/A	#N/A	#N/A	#N/A
CG15705	FBgn0034104	0.894929	0.607099	1.18276	-1.55381	-0.705462	-2.92308	#N/A	#N/A	#N/A	#N/A	#N/A	#N/A
CG7264	FBgn0036214	0.89287	0.554966	1.23077	-0.435294	-0.579733	-2.69357	0.568828	0.464156	0.6735	#DIV/0!	#DIV/0!	#DIV/0!
CG11726	FBgn0036156	0.892725	0.684234	1.10122	-0.126753	-0.574061	-2.72995	#N/A	#N/A	#N/A	#N/A	#N/A	#N/A
CG14282	FBgn0038685	0.891617	0.528808	1.25443	-0.891344	-0.420218	-2.48189	#N/A	#N/A	#N/A	#N/A	#N/A	#N/A
CG17777	FBgn0040900	0.891067	0.88439	0.897745	-0.964242	-0.757555	-0.661733	#N/A	#N/A	#N/A	#N/A	#N/A	#N/A
CG32396	FBgn0052396	0.890407	0.502997	1.27782	-1.39329	-0.31711	-3.71633	#N/A	#N/A	#N/A	#N/A	#N/A	#N/A
Ucp4C	FBgn0031757	0.889895	0.521729	1.25806	0.748739	-0.370684	-1.56265	#N/A	#N/A	#N/A	#N/A	#N/A	#N/A
CG13473	FBgn0036442	0.889736	0.577966	1.20151	-0.845376	-0.183915	-3.05772	#N/A	#N/A	#N/A	#N/A	#N/A	#N/A
CG15657	FBgn0034595	0.889674	0.67099	1.10836	1.08243	0.454949	-0.21137	#N/A	#N/A	#N/A	#N/A	#N/A	#N/A
CG11784	FBgn0033381	0.889563	0.989987	0.78914	-0.345134	-0.463225	-0.381724	0.428598	0.537698	0.319497	-0.290584	-0.203857	-0.0469281
CR43975	FBgn0264706	0.889066	0.634718	1.14342	-0.0751304	-0.795189	-0.990554	#N/A	#N/A	#N/A	#N/A	#N/A	#N/A
CG18336	FBgn0040763	0.886748	0.608278	1.16522	-0.479963	-0.321225	-0.849771	#N/A	#N/A	#N/A	#N/A	#N/A	#N/A
CG14579	FBgn0031163	0.885558	0.380527	1.39059	-1.22566	-0.506027	-2.26798	#N/A	#N/A	#N/A	#N/A	#N/A	#N/A
CG31804	FBgn0051804	0.885023	0.447292	1.32275	-2.49423	-0.282373	-3.78585	#N/A	#N/A	#N/A	#N/A	#N/A	#N/A
blp	FBgn0038387	0.884924	0.868854	0.900995	-0.151393	-0.0702794	-0.0260795	0.0313975	0.202066	-0.139271	-0.70803	-0.0656833	0.0815515
CG4480	FBgn0032553	0.884915	0.515719	1.25411	-0.796526	-0.547008	-3.58734	#N/A	#N/A	#N/A	#N/A	#N/A	#N/A
CG30156	FBgn0050156	0.883258	0.59302	1.1735	0.0570434	-0.246145	-1.17842	#N/A	#N/A	#N/A	#N/A	#N/A	#N/A
CG11588	FBgn0036221	0.883113	0.52801	1.23822	-1.14761	-0.645463	-4.06644	#N/A	#N/A	#N/A	#N/A	#N/A	#N/A
CG42448	FBgn0259922	0.882059	0.560976	1.20314	-0.808018	-0.749967	-2.6488	#N/A	#N/A	#N/A	#N/A	#N/A	#N/A
CG34204	FBgn0085233	0.881908	0.506224	1.25759	-1.39848	-0.37011	-3.44045	#N/A	#N/A	#N/A	#N/A	#N/A	#N/A
CG11703	FBgn0038690	0.881669	0.411493	1.35184	-1.56595	-0.18536	-1.09424	#N/A	#N/A	#N/A	#N/A	#N/A	#N/A
CG43063	FBgn0262365	0.881266	-0.094299	1.85683	-1.95867	1.05643	-0.779946	#N/A	#N/A	#N/A	#N/A	#N/A	#N/A
CG42827	FBgn0262009	0.880232	0.685069	1.0754	0.0534647	-0.126636	-0.932848	#N/A	#N/A	#N/A	#N/A	#N/A	#N/A
CR43358	FBgn0263090	0.879951	-0.0134662	1.77337	-0.46405	1.00532	-1.14849	#N/A	#N/A	#N/A	#N/A	#N/A	#N/A
CG31106	FBgn0051106	0.879824	0.868005	0.891643	-0.423172	0.0373907	-0.0752311	#N/A	#N/A	#N/A	#N/A	#N/A	#N/A
CG9168	FBgn0035216	0.878646	0.102882	1.65441	-0.529359	1.75641	-0.534034	2.19703	1.79867	2.59539	-2.30408	-2.13993	-2.4588
CG5122	FBgn0032471	0.87818	0.496759	1.2596	-2.20664	-0.230023	-3.69929	#N/A	#N/A	#N/A	#N/A	#N/A	#N/A
CG1701	FBgn0033167	0.877319	-0.25658	2.01122	-1.69589	1.39809	-0.845678	0.814115	0.386585	1.24164	0.471841	0.38554	0.505714
CG17300	FBgn0036345	0.876568	0.543687	1.20945	-1.98853	-0.12446	-2.43065	#N/A	#N/A	#N/A	#N/A	#N/A	#N/A
Mdr49	FBgn0004512	0.876567	0.858394	0.894739	-0.20174	0.00730747	-0.0723931	0.446545	0.363409	0.529681	#DIV/0!	#DIV/0!	#DIV/0!
Cpr66D	FBgn0052029	0.875776	1.23855	0.513005	0.754701	0.102673	0.306162	0.431666	0.380346	0.482985	1.00246	0.246321	0.202602
CG11913	FBgn0039331	0.875273	0.546254	1.20429	0.640919	-0.340727	-1.55963	0.147055	0.199903	0.0942076	-0.331697	-0.16943	-0.169802
CG12831	FBgn0033141	0.874939	0.47957	1.27031	-1.18704	-0.764701	-3.27969	#N/A	#N/A	#N/A	#N/A	#N/A	#N/A
CG13693	FBgn0031235	0.874726	0.518325	1.23113	0.722347	-0.517007	-2.58504	#N/A	#N/A	#N/A	#N/A	#N/A	#N/A
CG10510	FBgn0037059	0.874249	0.557201	1.1913	-0.498297	-0.55782	-2.27901	#N/A	#N/A	#N/A	#N/A	#N/A	#N/A
CG43168	FBgn0262787	0.873043	0.488406	1.25768	-1.97455	-0.32865	-3.55258	#N/A	#N/A	#N/A	#N/A	#N/A	#N/A
CG11165	FBgn0033238	0.87245	0.533709	1.21119	-0.232926	0.0167262	-2.88049	#N/A	#N/A	#N/A	#N/A	#N/A	#N/A
CG6569	FBgn0038909	0.871025	0.543911	1.19814	-0.0675611	-0.358884	-1.22377	#N/A	#N/A	#N/A	#N/A	#N/A	#N/A
CG11983	FBgn0037654	0.870455	0.677997	1.06291	0.617664	-0.29476	-0.520852	#N/A	#N/A	#N/A	#N/A	#N/A	#N/A
CG13557	FBgn0034867	0.870443	-0.173602	1.91449	-1.10772	0.731904	-0.88009	#N/A	#N/A	#N/A	#N/A	#N/A	#N/A
CG4438	FBgn0032115	0.869081	0.357654	1.38051	-1.53216	-0.765073	-2.55873	#N/A	#N/A	#N/A	#N/A	#N/A	#N/A
CG4810	FBgn0037994	0.867871	0.609047	1.1267	-2.54135	-0.863046	-4.03664	#N/A	#N/A	#N/A	#N/A	#N/A	#N/A
CG17122	FBgn0036962	0.86699	0.547161	1.18682	-0.201893	-0.479544	-1.27952	#N/A	#N/A	#N/A	#N/A	#N/A	#N/A
Torsin	FBgn0025615	0.866264	0.990944	0.741583	0.00650836	-0.0352775	0.0148626	0.739779	0.936876	0.542682	0.00618276	0.186602	0.382847
Cpr60D	FBgn0050163	0.866136	1.03263	0.69964	-0.210347	-0.179668	0.0307367	0.652252	0.582463	0.722041	#DIV/0!	#DIV/0!	#DIV/0!
CG11112	FBgn0033164	0.865316	-0.406909	2.13754	-0.767936	1.65098	-1.13757	-0.0709655	-0.10475	-0.0371812	-0.132342	-0.00336503	-0.0443052
CG6873	FBgn0030951	0.865029	0.510807	1.21925	-1.76402	0.113101	-3.19824	#N/A	#N/A	#N/A	#N/A	#N/A	#N/A
CG4270	FBgn0031407	0.863908	0.527614	1.2002	-2.12147	-0.414054	-3.31063	#N/A	#N/A	#N/A	#N/A	#N/A	#N/A
robl22E	FBgn0028570	0.863499	0.323252	1.40375	-0.315443	0.226599	-2.70365	#N/A	#N/A	#N/A	#N/A	#N/A	#N/A
CG9249	FBgn0032922	0.863455	0.867799	0.85911	-0.0872532	-0.102981	0.0160532	0.571815	0.638164	0.505467	0.351242	0.334047	0.434793
I-t	FBgn0025821	0.863237	0.516061	1.21041	0.0933671	-0.35186	-2.79223	#N/A	#N/A	#N/A	#N/A	#N/A	#N/A
CG2650	FBgn0000092	0.863154	1.2717	0.454612	1.23639	0.397901	0.968897	#N/A	#N/A	#N/A	#N/A	#N/A	#N/A
CG5224	FBgn0034354	0.86266	1.40248	0.32284	0.00582862	0.0200914	0.0396329	0.508215	0.938452	0.0779772	0.124174	0.273918	0.11467
CG31075	FBgn0051075	0.86192	1.11807	0.605767	-0.209339	-0.0308783	0.130089	1.04771	1.22817	0.867249	0.0894379	0.163059	0.31989
plx	FBgn0261261	0.858915	0.802786	0.915043	-0.130519	-0.221665	-0.306614	0.379038	0.371528	0.386548	#DIV/0!	#DIV/0!	#DIV/0!
CR43456	FBgn0263410	0.857551	0.0511814	1.66392	-0.292744	1.19151	-0.610291	#N/A	#N/A	#N/A	#N/A	#N/A	#N/A
P5CDh2	FBgn0053092	0.856182	0.632277	1.08009	-0.206156	-0.111061	-1.37445	#N/A	#N/A	#N/A	#N/A	#N/A	#N/A
CkIIbeta2	FBgn0026136	0.855586	0.581606	1.12957	-0.720382	-0.340038	-2.27488	#N/A	#N/A	#N/A	#N/A	#N/A	#N/A
CG10834	FBgn0032972	0.854779	0.620059	1.0895	0.298653	-0.665804	-1.66716	#N/A	#N/A	#N/A	#N/A	#N/A	#N/A
CG30356	FBgn0050356	0.854545	0.576647	1.13244	0.0869216	-0.393012	-1.39787	#N/A	#N/A	#N/A	#N/A	#N/A	#N/A
lectin-46Ca	FBgn0040093	0.854323	0.028571	1.68007	-0.159882	0.308507	-0.216386	1.31349	0.767522	1.85946	0.756037	0.287299	0.0468035
CG33669	FBgn0053669	0.853214	0.450856	1.25557	-1.22958	-0.281228	-3.07864	#N/A	#N/A	#N/A	#N/A	#N/A	#N/A
Phae2	FBgn0263235	0.852748	1.37029	0.335202	-0.184904	-0.0721001	0.115701	#N/A	#N/A	#N/A	#N/A	#N/A	#N/A
Msi	FBgn0043025	0.852443	0.527579	1.17731	-0.949138	-0.153324	-1.67336	#N/A	#N/A	#N/A	#N/A	#N/A	#N/A
Tengl1	FBgn0051682	0.851708	0.45124	1.25218	-0.572093	-0.62625	-2.27769	#N/A	#N/A	#N/A	#N/A	#N/A	#N/A
CG15136	FBgn0032625	0.851561	0.635816	1.06731	-0.072077	-0.559787	-2.10511	#N/A	#N/A	#N/A	#N/A	#N/A	#N/A
CG9483	FBgn0032072	0.851006	0.505471	1.19654	-2.31593	-0.531736	-3.32853	#N/A	#N/A	#N/A	#N/A	#N/A	#N/A
b	FBgn0000153	0.848666	0.876373	0.820959	-0.097131	-0.234676	-0.283541	0.901962	0.988598	0.815325	-0.126623	0.0768973	0.225431
CG42692	FBgn0261582	0.848335	0.802193	0.894478	-1.45314	-0.621532	-2.57834	#N/A	#N/A	#N/A	#N/A	#N/A	#N/A
CG34188	FBgn0085217	0.845478	0.548336	1.14262	0.899429	-0.769446	-2.10363	#N/A	#N/A	#N/A	#N/A	#N/A	#N/A
CG13891	FBgn0035139	0.84474	0.723319	0.96616	-1.89773	-0.325624	-2.86968	#N/A	#N/A	#N/A	#N/A	#N/A	#N/A
CG31803	FBgn0051803	0.844032	0.585157	1.10291	-0.314252	-0.731843	-1.64653	#N/A	#N/A	#N/A	#N/A	#N/A	#N/A
CG11362	FBgn0034737	0.843773	0.672246	1.0153	0.0432284	-0.71141	-1.21068	#N/A	#N/A	#N/A	#N/A	#N/A	#N/A
CG13088	FBgn0032047	0.843081	0.500093	1.18607	0.103008	-0.0833275	-0.828036	#N/A	#N/A	#N/A	#N/A	#N/A	#N/A
skpB	FBgn0026176	0.842478	0.645346	1.03961	-0.512308	-0.209917	-0.388459	0.0936375	0.0869018	0.100373	0.0577917	0.172898	0.24007
CG5781	FBgn0032448	0.841618	0.577934	1.1053	-0.298391	-0.399885	-1.62039	#N/A	#N/A	#N/A	#N/A	#N/A	#N/A
CG9582	FBgn0032090	0.841486	0.488643	1.19433	-1.92495	-0.653601	-3.45227	#N/A	#N/A	#N/A	#N/A	#N/A	#N/A
CG9316	FBgn0032878	0.841092	0.59184	1.09034	-0.835795	-0.465615	-3.17065	#N/A	#N/A	#N/A	#N/A	#N/A	#N/A
CG8236	FBgn0037626	0.839867	0.624536	1.0552	-0.187697	-0.758252	-1.27581	#N/A	#N/A	#N/A	#N/A	#N/A	#N/A
Dup99B	FBgn0250832	0.838835	0.0951677	1.5825	-0.0323042	0.736749	-1.8035	-0.339155	0.833899	-1.51221	-0.535689	-0.982087	2.42063
CG4955	FBgn0030814	0.837956	0.586608	1.0893	-1.12385	-0.189162	-3.06078	#N/A	#N/A	#N/A	#N/A	#N/A	#N/A
CG3473	FBgn0028913	0.836676	0.502984	1.17037	-0.162093	-0.20764	-3.81162	#DIV/0!	#DIV/0!	#DIV/0!	#DIV/0!	#DIV/0!	#DIV/0!
CG11113	FBgn0033165	0.834559	0.0841128	1.58501	-0.183007	0.565132	-0.773904	#N/A	#N/A	#N/A	#N/A	#N/A	#N/A
CG32706	FBgn0052706	0.834019	0.807047	0.860991	-0.000369204	-0.0255008	-0.0169288	#N/A	#N/A	#N/A	#N/A	#N/A	#N/A
CG33489	FBgn0053489	0.830523	0.518816	1.14223	-0.868246	-0.427771	-3.13734	#N/A	#N/A	#N/A	#N/A	#N/A	#N/A
CG15461	FBgn0040649	0.830226	0.572453	1.088	0.484423	-0.238303	-1.56549	#N/A	#N/A	#N/A	#N/A	#N/A	#N/A
CG4783	FBgn0038756	0.829868	1.49516	0.164573	0.0652544	0.00720593	0.201359	#N/A	#N/A	#N/A	#N/A	#N/A	#N/A
l(1)G0136	FBgn0026666	0.829018	0.675308	0.982728	-0.135626	-0.0269447	-0.050619	0.207327	-0.0288049	0.443459	0.151707	0.177138	0.278383
CG18131	FBgn0031343	0.828073	0.493556	1.16259	-0.163637	-0.383203	-3.15654	#N/A	#N/A	#N/A	#N/A	#N/A	#N/A
CG2964	FBgn0031462	0.827193	0.492216	1.16217	-0.593899	-0.166854	-3.10157	#N/A	#N/A	#N/A	#N/A	#N/A	#N/A
CG15483	FBgn0032457	0.826229	0.64956	1.0029	-0.223596	-0.17287	-2.86516	#N/A	#N/A	#N/A	#N/A	#N/A	#N/A
CG13581	FBgn0035014	0.825697	0.530791	1.1206	-0.0154748	-0.245505	-1.27398	#N/A	#N/A	#N/A	#N/A	#N/A	#N/A
CG8006	FBgn0035857	0.824135	0.437656	1.21062	-1.17046	0.102188	-1.52414	#N/A	#N/A	#N/A	#N/A	#N/A	#N/A
hale	FBgn0036924	0.823925	0.305368	1.34248	-1.18291	0.196904	-3.59729	#DIV/0!	#DIV/0!	#DIV/0!	#DIV/0!	#DIV/0!	#DIV/0!
CG15708	FBgn0034099	0.822287	0.430463	1.21411	-2.06457	-0.209981	-2.99948	#N/A	#N/A	#N/A	#N/A	#N/A	#N/A
Cyp6g2	FBgn0033696	0.821246	1.07969	0.562804	0.674722	-0.527535	0.618063	#N/A	#N/A	#N/A	#N/A	#N/A	#N/A
CG14246	FBgn0040608	0.820901	0.78965	0.852153	-0.304003	-0.354733	-0.275735	0.0696942	0.220725	-0.0813367	0.254781	0.0592104	0.278628
CG1835	FBgn0031127	0.818533	0.420451	1.21662	0.258731	-0.0721197	-0.954925	#N/A	#N/A	#N/A	#N/A	#N/A	#N/A
CG30486	FBgn0050486	0.818253	-0.0560827	1.69259	-0.326706	0.583809	-0.934144	#N/A	#N/A	#N/A	#N/A	#N/A	#N/A
CG11241	FBgn0037186	0.8158	0.939567	0.692034	-0.150506	-0.0827461	0.0432584	0.342665	0.307468	0.377861	-0.612281	-0.207076	-0.384371
CG7848	FBgn0034127	0.814925	0.499587	1.13026	0.373148	-0.482511	-1.01955	#N/A	#N/A	#N/A	#N/A	#N/A	#N/A
CR43752	FBgn0264083	0.814192	-0.143351	1.77174	-1.62784	0.9129	-1.61677	#N/A	#N/A	#N/A	#N/A	#N/A	#N/A
CG43075	FBgn0262485	0.813466	0.74834	0.878593	-0.528467	-1.10286	-2.71649	#N/A	#N/A	#N/A	#N/A	#N/A	#N/A
CG13186	FBgn0033680	0.812763	0.530612	1.09491	-1.88344	0.249016	-2.90394	#N/A	#N/A	#N/A	#N/A	#N/A	#N/A
CG12105	FBgn0035241	0.81108	0.771705	0.850456	-0.566315	-0.432965	-0.714495	0.180493	0.234469	0.126518	-0.342803	-0.207911	-0.165174
CG8420	FBgn0037664	0.809771	0.111064	1.50848	-0.274213	0.332878	-1.2412	#N/A	#N/A	#N/A	#N/A	#N/A	#N/A
CG9106	FBgn0030624	0.808307	0.418658	1.19796	-2.17879	-0.300811	-3.21531	#N/A	#N/A	#N/A	#N/A	#N/A	#N/A
CG1722	FBgn0031168	0.807416	0.505038	1.10979	-0.458478	-0.465709	-2.76253	#N/A	#N/A	#N/A	#N/A	#N/A	#N/A
CG43404	FBgn0263323	0.807327	-0.0530355	1.66769	-1.25142	0.762492	-1.19192	#N/A	#N/A	#N/A	#N/A	#N/A	#N/A
CG17751	FBgn0038717	0.806289	1.12131	0.491267	-1.16776	0.00298849	-0.228216	#N/A	#N/A	#N/A	#N/A	#N/A	#N/A
CG10899	FBgn0039235	0.806242	0.420678	1.19181	-0.373922	-0.0276925	-2.05644	#N/A	#N/A	#N/A	#N/A	#N/A	#N/A
CG15353	FBgn0040718	0.805202	1.05724	0.553162	-0.601673	-0.369993	-0.168881	#N/A	#N/A	#N/A	#N/A	#N/A	#N/A
CG15456	FBgn0040650	0.804216	0.967834	0.640597	-0.208837	-0.208476	-0.132007	0.409481	0.47885	0.340112	0.712507	0.705504	0.65365
CG31055	FBgn0051055	0.804065	0.485823	1.12231	-1.9166	-0.528002	-3.02553	#N/A	#N/A	#N/A	#N/A	#N/A	#N/A
CG7634	FBgn0037101	0.801723	0.411976	1.19147	-0.0256038	-0.221991	-3.22337	#N/A	#N/A	#N/A	#N/A	#N/A	#N/A
CG43993	FBgn0264725	0.801212	0.0714753	1.53095	0.211993	0.245551	-0.937995	#N/A	#N/A	#N/A	#N/A	#N/A	#N/A
CG40198	FBgn0058198	0.800663	0.945042	0.656284	-0.103005	-0.305167	0.0378257	#N/A	#N/A	#N/A	#N/A	#N/A	#N/A
CG5569	FBgn0034919	0.799482	0.545227	1.05374	-0.0965632	0.0204062	-0.00676697	0.261747	0.22742	0.296073	-0.463677	-0.196652	0.0925822
CG8851	FBgn0031546	0.799381	0.287708	1.31105	-0.365789	0.163524	-2.6705	-0.181287	-0.0369417	-0.325633	#DIV/0!	#DIV/0!	#DIV/0!
klhl10	FBgn0040038	0.797673	0.385002	1.21034	-0.249961	-0.213355	-2.41973	#N/A	#N/A	#N/A	#N/A	#N/A	#N/A
CG8446	FBgn0034089	0.797453	0.7476	0.847306	-0.300231	-0.216212	-0.197635	#N/A	#N/A	#N/A	#N/A	#N/A	#N/A
Sfp38D	FBgn0261058	0.797184	-0.126495	1.72086	-1.24088	1.38306	-0.701476	#N/A	#N/A	#N/A	#N/A	#N/A	#N/A
CG7716	FBgn0035800	0.7967	0.440801	1.1526	-2.00604	-0.331381	-3.59619	#N/A	#N/A	#N/A	#N/A	#N/A	#N/A
CG13623	FBgn0039205	0.795612	0.864974	0.726251	-0.0759239	0.106439	0.180513	0.153948	0.291622	0.0162735	0.0619817	0.444598	0.817543
CG7567	FBgn0039670	0.795496	0.689413	0.901578	0.835695	0.107311	0.565276	#N/A	#N/A	#N/A	#N/A	#N/A	#N/A
CG14898	FBgn0038437	0.795262	0.682974	0.90755	-0.1853	-0.0743867	-0.000278976	0.248663	0.273064	0.224261	-0.601463	0.00651357	-0.00689252
CG14537	FBgn0031954	0.794945	0.653794	0.936097	-1.17796	-0.703128	-3.18647	#N/A	#N/A	#N/A	#N/A	#N/A	#N/A
CG13018	FBgn0040751	0.794311	0.807587	0.781034	-0.154852	-0.108199	0.0269778	0.851845	1.15948	0.544208	0.163163	-0.00857551	0.428446
CG17030	FBgn0035584	0.794243	0.240018	1.34847	-1.68636	-0.0664684	-2.42166	#N/A	#N/A	#N/A	#N/A	#N/A	#N/A
CG31524	FBgn0051524	0.792814	-0.116642	1.70227	-0.947399	1.86069	-0.837885	#N/A	#N/A	#N/A	#N/A	#N/A	#N/A
sphinx2	FBgn0052382	0.792268	-0.301007	1.88554	-0.194623	1.49251	-0.549398	#N/A	#N/A	#N/A	#N/A	#N/A	#N/A
CG2336	FBgn0037455	0.791918	0.472916	1.11092	-2.4278	-0.0953821	-3.28837	#N/A	#N/A	#N/A	#N/A	#N/A	#N/A
Met75Ca	FBgn0028416	0.789484	-0.91044	2.48941	-0.614951	2.03323	-1.59853	#DIV/0!	#DIV/0!	#DIV/0!	#DIV/0!	#DIV/0!	#DIV/0!
CG15764	FBgn0029817	0.789416	0.37816	1.20067	-0.827701	-0.285018	-3.4197	#N/A	#N/A	#N/A	#N/A	#N/A	#N/A
sphinx1	FBgn0052383	0.788239	0.121492	1.45499	0.988685	0.594805	-0.741443	#N/A	#N/A	#N/A	#N/A	#N/A	#N/A
Vha100-3	FBgn0028669	0.788001	0.486905	1.0891	-1.7023	-0.767178	-4.28473	#N/A	#N/A	#N/A	#N/A	#N/A	#N/A
CG11562	FBgn0031247	0.787672	0.72958	0.845765	0.10491	-0.0524684	-0.0868197	0.29919	1.43335	-0.834966	-0.53424	-1.66766	0.316537
lectin-21Ca	FBgn0040107	0.787435	-0.17243	1.7473	0.779642	1.27197	-1.42643	#N/A	#N/A	#N/A	#N/A	#N/A	#N/A
CR43715	FBgn0263868	0.78712	-0.0100663	1.58431	-1.24916	0.0801475	-1.0849	#N/A	#N/A	#N/A	#N/A	#N/A	#N/A
CG31493	FBgn0051493	0.785869	-0.0136774	1.58541	-0.311521	0.819478	-0.989668	#N/A	#N/A	#N/A	#N/A	#N/A	#N/A
CG12020	FBgn0035273	0.785519	0.514923	1.05612	-0.565458	-0.239863	-2.92867	#N/A	#N/A	#N/A	#N/A	#N/A	#N/A
CG12376	FBgn0033323	0.78517	0.498141	1.0722	-1.01329	-0.476723	-2.67996	#N/A	#N/A	#N/A	#N/A	#N/A	#N/A
CG31021	FBgn0051021	0.784545	-0.0944604	1.66355	-1.45403	1.08544	-0.98832	#N/A	#N/A	#N/A	#N/A	#N/A	#N/A
lectin-46Cb	FBgn0040092	0.784394	0.303145	1.26564	-0.0720194	0.136932	-0.213538	1.33367	0.847678	1.81966	0.751548	0.130129	0.239007
CG15256	FBgn0028880	0.784231	0.470189	1.09827	-1.56912	-0.689571	-4.02171	#N/A	#N/A	#N/A	#N/A	#N/A	#N/A
CG13337	FBgn0033863	0.7842	0.221548	1.34685	-2.48783	-0.012279	-3.58065	#N/A	#N/A	#N/A	#N/A	#N/A	#N/A
CG14277	FBgn0032008	0.784155	0.644207	0.924102	-0.253932	-0.0124598	-0.0413533	1.17708	1.00259	1.35158	#DIV/0!	#DIV/0!	#DIV/0!
CG42470	FBgn0259960	0.783485	-0.204624	1.77159	-1.35146	0.888936	-0.601934	#N/A	#N/A	#N/A	#N/A	#N/A	#N/A
CG12035	FBgn0035263	0.782785	0.406484	1.15909	0.396154	-0.153842	-1.71302	#N/A	#N/A	#N/A	#N/A	#N/A	#N/A
CG4714	FBgn0033819	0.7826	0.391194	1.17401	-0.302298	-0.0978318	-2.64123	#N/A	#N/A	#N/A	#N/A	#N/A	#N/A
CG32945	FBgn0052945	0.782543	0.57894	0.986147	-1.34192	-0.616578	-2.88313	#N/A	#N/A	#N/A	#N/A	#N/A	#N/A
CG12681	FBgn0029730	0.782394	0.440066	1.12472	-1.16621	-0.485683	-3.18316	#N/A	#N/A	#N/A	#N/A	#N/A	#N/A
rha	FBgn0027376	0.782308	0.42048	1.14414	0.200971	-0.373779	-1.56761	#N/A	#N/A	#N/A	#N/A	#N/A	#N/A
CG8067	FBgn0033891	0.782259	0.734533	0.829985	0.0336427	0.0336487	0.068617	-0.0309799	0.00637189	-0.0683318	-0.042792	0.127536	0.215771
CG11291	FBgn0034713	0.782063	0.418076	1.14605	-1.05466	-0.371721	-2.45071	#N/A	#N/A	#N/A	#N/A	#N/A	#N/A
CG11251	FBgn0036346	0.779352	0.436836	1.12187	-1.53515	-0.32079	-4.67353	#N/A	#N/A	#N/A	#N/A	#N/A	#N/A
CG7551	FBgn0036161	0.777297	0.513498	1.0411	-2.82373	-0.331009	-3.32695	#N/A	#N/A	#N/A	#N/A	#N/A	#N/A
CG14013	FBgn0031720	0.775861	0.372838	1.17888	-1.12267	-0.147821	-2.79952	#N/A	#N/A	#N/A	#N/A	#N/A	#N/A
CG8043	FBgn0037610	0.775672	0.668005	0.883339	0.241245	0.217197	0.221224	0.282215	0.330147	0.234282	0.0240829	0.251969	0.632726
CG43089	FBgn0262535	0.77486	0.392445	1.15728	-0.944382	-0.181228	-2.29126	#N/A	#N/A	#N/A	#N/A	#N/A	#N/A
CG5556	FBgn0031332	0.774856	0.522354	1.02736	-2.55845	-0.695812	-3.24076	#N/A	#N/A	#N/A	#N/A	#N/A	#N/A
CG31128	FBgn0051128	0.773995	0.466089	1.0819	-1.34006	-0.176939	-3.45886	#N/A	#N/A	#N/A	#N/A	#N/A	#N/A
CG14891	FBgn0038445	0.773433	0.49575	1.05112	-1.09287	-0.341022	-3.0093	#N/A	#N/A	#N/A	#N/A	#N/A	#N/A
CG2574	FBgn0030386	0.772647	0.440478	1.10482	-2.21846	-0.31902	-2.78122	#N/A	#N/A	#N/A	#N/A	#N/A	#N/A
CG43322	FBgn0263027	0.772387	0.78792	0.756853	-0.465275	-0.406251	-0.324361	0.641725	0.838813	0.444636	#DIV/0!	#DIV/0!	#DIV/0!
CG14294	FBgn0038656	0.771288	0.413418	1.12916	-0.861493	-0.355607	-2.22083	#N/A	#N/A	#N/A	#N/A	#N/A	#N/A
Vha36-2	FBgn0033706	0.771266	0.429446	1.11309	-1.23327	-0.165311	-2.97409	#N/A	#N/A	#N/A	#N/A	#N/A	#N/A
CG42752	FBgn0261806	0.771261	0.530074	1.01245	-0.570366	-0.47916	-2.77057	#N/A	#N/A	#N/A	#N/A	#N/A	#N/A
CG9406	FBgn0034592	0.771215	0.48374	1.05869	-0.551238	-0.345515	-3.56427	#N/A	#N/A	#N/A	#N/A	#N/A	#N/A
CG14401	FBgn0032900	0.770546	0.999023	0.542069	0.213372	0.0981549	0.200619	0.740226	1.12212	0.358329	#DIV/0!	#DIV/0!	#DIV/0!
CG13527	FBgn0034776	0.769804	0.72256	0.817048	-1.31875	-0.333722	-2.85219	#N/A	#N/A	#N/A	#N/A	#N/A	#N/A
CG31515	FBgn0051515	0.769523	-0.178932	1.71798	-0.889262	2.08576	-0.551707	#N/A	#N/A	#N/A	#N/A	#N/A	#N/A
CG31910	FBgn0051910	0.76865	0.646818	0.890481	-0.653366	-0.482617	-2.29251	#N/A	#N/A	#N/A	#N/A	#N/A	#N/A
Eno	FBgn0000579	0.768388	0.735924	0.800853	-0.133342	-0.138142	-0.189276	0.268902	0.318239	0.219564	-0.111711	-0.0558525	0.0873104
SIP3	FBgn0061196	0.766748	0.479983	1.05351	-0.355336	-0.194251	-2.548	#N/A	#N/A	#N/A	#N/A	#N/A	#N/A
eIF4E-7	FBgn0040368	0.766658	0.401465	1.13185	-1.88217	-0.391102	-3.65815	#N/A	#N/A	#N/A	#N/A	#N/A	#N/A
CG43789	FBgn0264330	0.766152	-0.191064	1.72337	0.205556	0.162027	-0.686125	#N/A	#N/A	#N/A	#N/A	#N/A	#N/A
CG12126	FBgn0033280	0.76594	0.384015	1.14787	-2.17172	-0.770331	-3.47848	#N/A	#N/A	#N/A	#N/A	#N/A	#N/A
CG11044	FBgn0034484	0.765043	0.864609	0.665476	0.0552305	0.019199	-0.0242901	0.00105714	0.0584221	-0.0563078	#DIV/0!	#DIV/0!	#DIV/0!
Dic3	FBgn0033248	0.764725	0.538269	0.99118	-1.48792	-0.161142	-2.69947	#N/A	#N/A	#N/A	#N/A	#N/A	#N/A
CG8613	FBgn0033924	0.764289	0.713771	0.814808	0.0151074	-0.0440579	-0.0420841	0.294833	0.31889	0.270776	-0.0325728	0.261845	0.32072
CG34220	FBgn0085249	0.763912	1.18801	0.339819	-0.0422864	-0.000977213	0.0877317	#N/A	#N/A	#N/A	#N/A	#N/A	#N/A
CG13838	FBgn0039041	0.763642	0.338589	1.1887	-0.314925	-0.000276878	-1.41851	#N/A	#N/A	#N/A	#N/A	#N/A	#N/A
Pp1-13C	FBgn0003132	0.762914	0.423486	1.10234	-0.534836	-0.159718	-3.23413	-0.0980507	-0.054517	-0.141584	-0.0382925	-0.0964242	-0.0159842
CG15458	FBgn0040651	0.762454	0.502615	1.02229	0.596328	-0.708723	-1.4271	#N/A	#N/A	#N/A	#N/A	#N/A	#N/A
CG10651	FBgn0032853	0.762443	0.0769297	1.44796	-0.129353	0.50688	-0.88976	#N/A	#N/A	#N/A	#N/A	#N/A	#N/A
CG15739	FBgn0030347	0.762095	1.01137	0.512822	-0.101657	0.113852	0.253675	1.40864	1.47904	1.33824	#DIV/0!	#DIV/0!	#DIV/0!
ppk28	FBgn0030795	0.76092	1.47311	0.0487258	0.955958	-0.262204	0.858853	#N/A	#N/A	#N/A	#N/A	#N/A	#N/A
CG2014	FBgn0039669	0.760689	0.60196	0.919418	-0.663786	-0.910875	-2.35133	0.164271	0.191256	0.137287	-0.431694	-0.0783382	-0.070552
CG15864	FBgn0040528	0.760588	-0.122825	1.644	0.0462312	0.587348	-0.447367	#N/A	#N/A	#N/A	#N/A	#N/A	#N/A
CG4271	FBgn0031409	0.760171	-0.149883	1.67022	-0.668001	1.84385	-0.750521	#N/A	#N/A	#N/A	#N/A	#N/A	#N/A
CG6908	FBgn0037936	0.760055	0.686056	0.834054	0.0177318	0.0209749	0.00884595	1.60636	1.33182	1.8809	-0.156453	-0.129207	-0.131821
CG34222	FBgn0250822	0.759331	0.454767	1.06389	-1.88687	-0.22096	-2.45101	#N/A	#N/A	#N/A	#N/A	#N/A	#N/A
CG5718	FBgn0036222	0.757795	0.387419	1.12817	-3.1043	-0.406611	-3.70793	0.11564	0.253121	-0.0218401	#DIV/0!	#DIV/0!	#DIV/0!
Ntl	FBgn0031934	0.757684	0.593126	0.922242	-1.0717	-0.709289	-2.35498	#N/A	#N/A	#N/A	#N/A	#N/A	#N/A
CG31805	FBgn0051805	0.756384	0.512471	1.0003	-0.0496089	-0.900881	-3.25733	#N/A	#N/A	#N/A	#N/A	#N/A	#N/A
CG33514	FBgn0053514	0.756348	0.868646	0.64405	-1.17007	-0.027408	-0.0577231	0.853034	0.752908	0.95316	#DIV/0!	#DIV/0!	#DIV/0!
CG10177	FBgn0039083	0.756318	0.39298	1.11966	-0.463469	-0.101135	-2.15853	#N/A	#N/A	#N/A	#N/A	#N/A	#N/A
CG14482	FBgn0034245	0.754729	0.668059	0.841399	-0.236454	-0.179394	-0.144768	0.158651	0.132184	0.185117	-0.301089	-0.131961	-0.154865
CSN1a	FBgn0028838	0.754584	0.459731	1.04944	-2.14783	-0.234677	-3.14288	#N/A	#N/A	#N/A	#N/A	#N/A	#N/A
CG12934	FBgn0033541	0.754273	-0.114554	1.6231	0.804975	0.448605	0.573315	#N/A	#N/A	#N/A	#N/A	#N/A	#N/A
CG6293	FBgn0037807	0.753668	0.631577	0.87576	0.028022	-0.127458	-0.166031	1.35975	1.19142	1.52808	0.250395	0.075128	-0.0140753
Obp57a	FBgn0043535	0.753019	1.03523	0.470811	-0.0325443	-0.0133537	-0.0228904	0.223092	1.67244	-1.22626	#DIV/0!	#DIV/0!	#DIV/0!
CG14011	FBgn0031722	0.753018	0.485436	1.0206	-0.634408	-0.659434	-3.4548	#N/A	#N/A	#N/A	#N/A	#N/A	#N/A
CG12859	FBgn0033961	0.752876	0.648468	0.857284	-0.196436	-0.175117	-0.187669	0.0306049	0.0721222	-0.0109124	-0.0215734	0.0615317	-0.123772
CG12692	FBgn0029703	0.752751	0.326409	1.17909	-0.460146	-0.418392	-3.54775	#N/A	#N/A	#N/A	#N/A	#N/A	#N/A
CG43123	FBgn0262583	0.752213	-0.29946	1.80389	-0.339142	1.13391	-0.843648	#N/A	#N/A	#N/A	#N/A	#N/A	#N/A
Trf4-2	FBgn0039251	0.749937	0.454375	1.0455	-0.139595	-0.263932	-2.17916	#N/A	#N/A	#N/A	#N/A	#N/A	#N/A
CG13385	FBgn0032039	0.749539	0.415366	1.08371	-2.57539	-0.203443	-3.61382	#N/A	#N/A	#N/A	#N/A	#N/A	#N/A
CG15579	FBgn0040906	0.747385	0.606131	0.888639	0.449476	-0.222333	-1.02108	#N/A	#N/A	#N/A	#N/A	#N/A	#N/A
CG12693	FBgn0029705	0.746898	0.42606	1.06774	-0.353304	-0.175229	-2.97569	#N/A	#N/A	#N/A	#N/A	#N/A	#N/A
Cyp18a1	FBgn0010383	0.744979	0.821941	0.668016	-0.420471	-0.256917	-0.304573	#N/A	#N/A	#N/A	#N/A	#N/A	#N/A
CG16781	FBgn0029661	0.744591	0.527225	0.961957	-0.856419	-0.800295	-3.41646	#N/A	#N/A	#N/A	#N/A	#N/A	#N/A
CG3942	FBgn0038008	0.744449	0.474815	1.01408	0.178899	-0.315328	-2.6484	#N/A	#N/A	#N/A	#N/A	#N/A	#N/A
CG7335	FBgn0036941	0.744102	0.378317	1.10989	-0.379826	-0.0931196	-2.28632	#N/A	#N/A	#N/A	#N/A	#N/A	#N/A
Pka-C2	FBgn0000274	0.742476	0.42186	1.06309	-0.424195	-0.374454	-2.93008	#N/A	#N/A	#N/A	#N/A	#N/A	#N/A
CG43307	FBgn0262999	0.742067	0.0313294	1.4528	-0.193108	1.12457	-0.849613	#N/A	#N/A	#N/A	#N/A	#N/A	#N/A
CG6752	FBgn0038296	0.74086	0.458732	1.02299	-0.16719	-0.282951	-1.30617	#N/A	#N/A	#N/A	#N/A	#N/A	#N/A
CG3557	FBgn0031423	0.740824	0.390178	1.09147	-0.881941	-0.309064	-3.19294	#N/A	#N/A	#N/A	#N/A	#N/A	#N/A
CG13008	FBgn0030780	0.740355	0.387752	1.09296	-1.51834	-0.359905	-2.73054	#N/A	#N/A	#N/A	#N/A	#N/A	#N/A
CG43049	FBgn0262351	0.740116	0.520788	0.959443	-0.891111	-0.58777	-2.15241	#N/A	#N/A	#N/A	#N/A	#N/A	#N/A
Surf1	FBgn0029117	0.740114	0.879119	0.60111	0.153701	0.144792	0.270657	0.456065	0.596548	0.315582	0.0257716	0.179636	0.010018
CG10345	FBgn0027562	0.74006	0.770092	0.710029	-0.243244	-0.0884861	-0.0508303	0.434223	0.318313	0.550133	0.66268	0.808593	0.077721
CG5500	FBgn0039461	0.739901	0.787593	0.692209	-0.228011	-0.120574	-0.119398	0.172857	0.359956	-0.0142427	-0.334147	-0.275385	0.182578
Adgf-B	FBgn0036751	0.739726	0.444784	1.03467	-1.56745	-0.111333	-4.79506	#DIV/0!	#DIV/0!	#DIV/0!	#DIV/0!	#DIV/0!	#DIV/0!
swaPsi	FBgn0016974	0.738533	0.432783	1.04428	1.06173	0.0232416	-0.30914	#N/A	#N/A	#N/A	#N/A	#N/A	#N/A
CG6830	FBgn0037934	0.736517	0.872376	0.600659	-0.480285	0.0135729	-0.0397804	0.702954	0.575069	0.830839	-0.146876	0.0923125	-0.136976
CG43448	FBgn0263402	0.736321	0.607119	0.865523	0.106974	-0.209611	-0.696723	#N/A	#N/A	#N/A	#N/A	#N/A	#N/A
ACXC	FBgn0040508	0.7362	0.431443	1.04096	-1.13588	-0.396938	-2.70013	#N/A	#N/A	#N/A	#N/A	#N/A	#N/A
Tengl4	FBgn0037857	0.736173	0.359254	1.11309	-1.10818	-0.0248741	-2.78562	#N/A	#N/A	#N/A	#N/A	#N/A	#N/A
fzr2	FBgn0034937	0.736076	0.449082	1.02307	0.277656	-0.0810017	-1.30578	#N/A	#N/A	#N/A	#N/A	#N/A	#N/A
CG11379	FBgn0040362	0.734348	0.352051	1.11665	-1.51249	0.0776978	-2.59301	#N/A	#N/A	#N/A	#N/A	#N/A	#N/A
per	FBgn0003068	0.733983	1.0042	0.463762	0.212836	0.0766919	0.210966	#N/A	#N/A	#N/A	#N/A	#N/A	#N/A
CG12158	FBgn0040775	0.733086	0.671507	0.794666	-0.308676	-0.000715562	-0.000418396	#N/A	#N/A	#N/A	#N/A	#N/A	#N/A
Cpr49Ab	FBgn0050042	0.732762	1.80403	-0.338508	-0.426241	-0.727976	0.0304053	-0.882168	-0.661071	-1.10326	-1.27776	-0.282316	-0.386876
CG31601	FBgn0051601	0.73256	0.522015	0.943105	2.01418	0.32552	-0.263659	#N/A	#N/A	#N/A	#N/A	#N/A	#N/A
CG6497	FBgn0036704	0.732308	0.47714	0.987477	-1.42315	-0.364354	-3.32582	#N/A	#N/A	#N/A	#N/A	#N/A	#N/A
CG15147	FBgn0032654	0.732158	0.454177	1.01014	-1.9807	-0.0622072	-3.70378	#N/A	#N/A	#N/A	#N/A	#N/A	#N/A
CG30447	FBgn0050447	0.730543	0.472459	0.988627	-0.611528	-0.339829	-2.23337	#N/A	#N/A	#N/A	#N/A	#N/A	#N/A
CG33017	FBgn0053017	0.72989	0.267591	1.19219	-1.13293	0.0527069	-3.06391	#N/A	#N/A	#N/A	#N/A	#N/A	#N/A
CG1138	FBgn0037456	0.729822	0.414895	1.04475	-1.19159	-0.433834	-2.36835	#N/A	#N/A	#N/A	#N/A	#N/A	#N/A
CG34210	FBgn0085239	0.729361	0.429208	1.02951	-1.84475	-0.200947	-2.99081	#N/A	#N/A	#N/A	#N/A	#N/A	#N/A
CG11249	FBgn0037115	0.729023	0.403804	1.05424	-0.941623	-0.231118	-2.8732	#N/A	#N/A	#N/A	#N/A	#N/A	#N/A
CG14352	FBgn0031351	0.728944	0.936659	0.521228	-0.0202756	-0.159371	-0.0634223	#N/A	#N/A	#N/A	#N/A	#N/A	#N/A
CG42710	FBgn0261627	0.728368	0.335564	1.12117	-2.33715	-0.242669	-3.50362	#N/A	#N/A	#N/A	#N/A	#N/A	#N/A
CG12069	FBgn0039796	0.728306	0.494993	0.961618	-2.30215	-0.64289	-3.32333	-0.0794883	0.0567265	-0.215703	0.391588	0.24082	0.135229
CG7441	FBgn0036763	0.726548	0.540065	0.913032	-0.201159	-0.183724	-0.342579	0.0647154	0.0955377	0.0338931	-0.477255	-0.30393	-0.113855
CR33318	FBgn0053318	0.72629	0.33253	1.12005	0.0564247	-0.596017	-1.88327	#N/A	#N/A	#N/A	#N/A	#N/A	#N/A
CG30177	FBgn0050177	0.726023	0.45195	1.0001	-1.80638	-0.397871	-3.47409	#N/A	#N/A	#N/A	#N/A	#N/A	#N/A
Actn3	FBgn0015008	0.724802	0.403847	1.04576	-2.24302	-0.24844	-3.14177	#N/A	#N/A	#N/A	#N/A	#N/A	#N/A
CG18109	FBgn0028901	0.724506	0.43659	1.01242	-2.17756	-0.309777	-3.91058	#N/A	#N/A	#N/A	#N/A	#N/A	#N/A
Dbi	FBgn0010387	0.724053	1.01097	0.437133	-0.0667003	-0.0199764	0.0607202	0.668782	0.628201	0.709363	-0.490695	-0.00258571	0.415605
CG15873	FBgn0035003	0.723658	0.523018	0.924297	-0.596596	-1.16375	-2.65648	#N/A	#N/A	#N/A	#N/A	#N/A	#N/A
Erk7	FBgn0052703	0.723561	0.419758	1.02736	0.149263	-0.314513	-2.61762	1.14627	1.22671	1.06583	#DIV/0!	#DIV/0!	#DIV/0!
CG17633	FBgn0032144	0.723286	0.379923	1.06665	-1.47346	-0.136357	-0.309542	#N/A	#N/A	#N/A	#N/A	#N/A	#N/A
CG31347	FBgn0051347	0.723041	0.604708	0.841374	0.255403	-0.39933	-0.530281	#N/A	#N/A	#N/A	#N/A	#N/A	#N/A
Met75Cb	FBgn0028415	0.722733	-1.02266	2.46812	-0.455176	2.10612	-1.54122	#N/A	#N/A	#N/A	#N/A	#N/A	#N/A
CG18371	FBgn0033893	0.722452	0.297247	1.14766	-0.340505	-0.372853	-1.59904	#N/A	#N/A	#N/A	#N/A	#N/A	#N/A
CG8038	FBgn0035831	0.72219	0.990472	0.453907	0.313815	0.0645175	0.144346	#N/A	#N/A	#N/A	#N/A	#N/A	#N/A
CG8818	FBgn0033751	0.721819	0.656916	0.786722	-0.0625217	0.025412	0.0438687	#N/A	#N/A	#N/A	#N/A	#N/A	#N/A
CR43805	FBgn0264349	0.721762	-0.156563	1.60009	-0.806641	1.70668	-0.432994	#N/A	#N/A	#N/A	#N/A	#N/A	#N/A
fzo	FBgn0011596	0.721758	0.370919	1.0726	0.831542	-0.163756	-1.63222	#N/A	#N/A	#N/A	#N/A	#N/A	#N/A
CG2750	FBgn0030376	0.721189	0.413174	1.0292	-0.556421	-0.243164	-2.88238	#N/A	#N/A	#N/A	#N/A	#N/A	#N/A
ste24b	FBgn0034175	0.721095	0.706334	0.735856	0.102949	-0.576896	-1.1065	#N/A	#N/A	#N/A	#N/A	#N/A	#N/A
CG33664	FBgn0053664	0.721079	0.356929	1.08523	-1.1636	-0.320492	-2.71251	#N/A	#N/A	#N/A	#N/A	#N/A	#N/A
CG43267	FBgn0262948	0.720158	-0.396185	1.8365	-0.408727	0.77758	-0.353125	#N/A	#N/A	#N/A	#N/A	#N/A	#N/A
CG9331	FBgn0032889	0.715941	0.936697	0.495184	-0.0725136	0.00433153	0.0546384	0.393998	0.343779	0.444217	0.0208484	0.197428	0.530985
CG12558	FBgn0039599	0.714576	-0.220786	1.64994	-1.18623	1.42076	-0.83096	#N/A	#N/A	#N/A	#N/A	#N/A	#N/A
CG15528	FBgn0039742	0.714157	0.92279	0.505525	-0.207798	-0.427879	-0.40549	#N/A	#N/A	#N/A	#N/A	#N/A	#N/A
LysB	FBgn0004425	0.712041	0.758156	0.665927	-1.71615	-0.204868	-0.171363	#DIV/0!	#DIV/0!	#DIV/0!	#DIV/0!	#DIV/0!	#DIV/0!
ana1	FBgn0262167	0.710276	0.622356	0.798197	0.505424	0.0962745	0.0848881	#N/A	#N/A	#N/A	#N/A	#N/A	#N/A
CG10920	FBgn0029963	0.710157	0.38633	1.03398	-2.02653	-0.37313	-3.02162	#N/A	#N/A	#N/A	#N/A	#N/A	#N/A
CG9377	FBgn0032507	0.71006	0.895898	0.524223	-0.00506551	0.0699947	0.334755	0.62094	0.644349	0.597531	-0.0405774	0.0561657	0.167162
RpL22-like	FBgn0034837	0.708779	0.606878	0.810679	0.613228	-1.49856	-1.66945	0.197129	0.262116	0.132142	#DIV/0!	#DIV/0!	#DIV/0!
CG15676	FBgn0034651	0.708701	0.447894	0.969509	0.00619293	-0.362074	-1.99344	#N/A	#N/A	#N/A	#N/A	#N/A	#N/A
CG8768	FBgn0033769	0.708577	0.690313	0.726842	-0.129624	-0.159951	-0.172331	0.0915171	-0.192875	0.375909	-0.102513	0.28472	0.310446
CG14071	FBgn0032312	0.707676	0.476121	0.93923	-0.783576	-0.091996	-3.91541	#N/A	#N/A	#N/A	#N/A	#N/A	#N/A
Sesn	FBgn0034897	0.707606	0.611662	0.80355	0.0833091	-0.0681076	-0.168743	-0.251592	-0.318414	-0.184771	#DIV/0!	#DIV/0!	#DIV/0!
CG33287	FBgn0053287	0.706574	0.375876	1.03727	-1.67241	-0.0352932	-3.70318	#N/A	#N/A	#N/A	#N/A	#N/A	#N/A
CG31231	FBgn0051231	0.705102	0.377285	1.03292	-0.118534	-0.169431	-2.86705	#N/A	#N/A	#N/A	#N/A	#N/A	#N/A
CG31174	FBgn0051174	0.703693	0.522367	0.885019	0.10116	-0.468947	-0.752883	#N/A	#N/A	#N/A	#N/A	#N/A	#N/A
CG3739	FBgn0038702	0.702848	0.935474	0.470222	-0.588425	0.0021558	0.120857	0.522609	0.460342	0.584877	#DIV/0!	#DIV/0!	#DIV/0!
CG32201	FBgn0052201	0.702484	0.00155044	1.40342	-0.377365	1.36047	-0.730679	#N/A	#N/A	#N/A	#N/A	#N/A	#N/A
CG4073	FBgn0037827	0.702308	0.393893	1.01072	-1.00212	-0.457734	-3.29461	#N/A	#N/A	#N/A	#N/A	#N/A	#N/A
CG11455	FBgn0031228	0.70172	0.574329	0.829112	-0.142787	-0.143576	-0.152079	0.238684	0.409956	0.0674115	-0.0764478	-0.104582	0.211836
CG4839	FBgn0032187	0.701699	0.484751	0.918646	-0.416743	0.00828131	-0.0047433	#N/A	#N/A	#N/A	#N/A	#N/A	#N/A
CG5435	FBgn0032431	0.701562	0.544134	0.858991	-0.742832	-0.484565	-2.01936	#N/A	#N/A	#N/A	#N/A	#N/A	#N/A
CG15742	FBgn0030462	0.700357	0.45228	0.948433	0.315477	-0.458458	-2.62922	#N/A	#N/A	#N/A	#N/A	#N/A	#N/A
CG18317	FBgn0031359	0.699351	0.655508	0.743195	-0.231717	-0.183034	-0.223432	0.328264	0.34706	0.309467	-0.0813566	-0.0963654	-0.453807
CG6484	FBgn0034247	0.698166	0.619709	0.776624	-0.132192	0.0894018	0.0974974	0.769132	0.513348	1.02492	-0.749514	0.738924	0.221817
CR43086	FBgn0262532	0.697896	0.123609	1.27218	1.59138	2.2365	0.336546	#N/A	#N/A	#N/A	#N/A	#N/A	#N/A
iotaTry	FBgn0015001	0.69665	0.117188	1.27611	-1.77129	0.208599	-0.43727	#N/A	#N/A	#N/A	#N/A	#N/A	#N/A
CG7224	FBgn0031971	0.696382	0.779093	0.613671	0.0850365	0.0423808	0.110353	0.244275	0.0960702	0.39248	0.279086	0.159849	-0.00737123
Cyp4d20	FBgn0035344	0.694761	0.854276	0.535246	-0.17978	-0.0457517	0.0235783	2.34661	2.27657	2.41664	#DIV/0!	#DIV/0!	#DIV/0!
CG34460	FBgn0085489	0.694596	0.65126	0.737932	-0.00277217	-0.781735	-0.770437	#N/A	#N/A	#N/A	#N/A	#N/A	#N/A
CG5987	FBgn0039501	0.69456	0.38193	1.00719	-0.131567	-0.0166907	-0.633212	#N/A	#N/A	#N/A	#N/A	#N/A	#N/A
CG14290	FBgn0038662	0.693785	0.535782	0.851788	-0.149998	-0.168909	-0.177949	0.348927	0.442964	0.25489	-0.513543	-0.445829	-0.420831
CG12438	FBgn0032065	0.693701	0.45067	0.936733	-0.756973	-0.389687	-3.28973	#N/A	#N/A	#N/A	#N/A	#N/A	#N/A
CG15878	FBgn0035316	0.692895	0.402009	0.983781	-0.688776	-0.19653	-1.56627	#N/A	#N/A	#N/A	#N/A	#N/A	#N/A
CG32454	FBgn0260481	0.692635	0.531108	0.854163	0.267617	-0.340967	-0.945437	#N/A	#N/A	#N/A	#N/A	#N/A	#N/A
CG16984	FBgn0062517	0.692226	0.460962	0.92349	-0.174672	-0.132264	-1.0647	#N/A	#N/A	#N/A	#N/A	#N/A	#N/A
CG31093	FBgn0051093	0.691934	0.465183	0.918685	0.689913	-1.04428	-1.98885	#N/A	#N/A	#N/A	#N/A	#N/A	#N/A
hubl	FBgn0050364	0.691886	0.379163	1.00461	0.398189	-0.207248	-3.04478	#N/A	#N/A	#N/A	#N/A	#N/A	#N/A
CG11262	FBgn0036329	0.691714	0.360009	1.02342	-1.44181	-0.108881	-3.69514	#N/A	#N/A	#N/A	#N/A	#N/A	#N/A
CG14505	FBgn0034327	0.689078	0.54589	0.832265	0.592013	-0.695868	-2.30176	#N/A	#N/A	#N/A	#N/A	#N/A	#N/A
CG43290	FBgn0262982	0.687436	0.580334	0.794538	-1.71971	-0.836883	-2.44685	#N/A	#N/A	#N/A	#N/A	#N/A	#N/A
CG9235	FBgn0034560	0.686321	0.410077	0.962565	-2.10634	-0.340619	-3.46884	#N/A	#N/A	#N/A	#N/A	#N/A	#N/A
CG34172	FBgn0085201	0.685349	0.683589	0.687109	-0.49715	-0.260259	-0.238831	#DIV/0!	#DIV/0!	#DIV/0!	#DIV/0!	#DIV/0!	#DIV/0!
Cyt-c-p	FBgn0000409	0.684898	0.531781	0.838016	-0.278842	-0.146642	-0.218227	#N/A	#N/A	#N/A	#N/A	#N/A	#N/A
CG34189	FBgn0085218	0.684621	0.424672	0.944569	0.0734424	-0.110916	-0.470639	1.35817	0.788086	1.92826	#DIV/0!	#DIV/0!	#DIV/0!
CG14689	FBgn0037826	0.684615	0.365504	1.00373	-2.38286	-0.347745	-3.83729	#N/A	#N/A	#N/A	#N/A	#N/A	#N/A
CG8584	FBgn0033322	0.683999	0.406735	0.961263	-1.81326	-0.147939	-4.13281	#N/A	#N/A	#N/A	#N/A	#N/A	#N/A
Gpdh	FBgn0001128	0.682644	0.471168	0.89412	-0.281837	-0.189403	-0.258807	0.223734	0.291597	0.155872	-0.130697	-0.179304	-0.308505
CG1314	FBgn0031134	0.681555	0.441475	0.921634	-1.67192	-0.46942	-3.2012	#N/A	#N/A	#N/A	#N/A	#N/A	#N/A
CG34450	FBgn0085479	0.681209	0.474271	0.888148	-0.136933	-0.415517	-1.44666	#N/A	#N/A	#N/A	#N/A	#N/A	#N/A
CG13204	FBgn0033627	0.680396	0.689839	0.670954	0.249938	-0.0781039	0.158033	#N/A	#N/A	#N/A	#N/A	#N/A	#N/A
CG14275	FBgn0032022	0.680131	0.828079	0.532184	-0.149345	-0.0299662	-0.0145676	0.604563	0.858411	0.350714	-0.204245	-0.2184	-0.054904
CG43760	FBgn0264260	0.680006	0.416599	0.943413	-1.81893	-0.951901	-2.53859	#N/A	#N/A	#N/A	#N/A	#N/A	#N/A
CG13991	FBgn0031785	0.679803	0.330092	1.02951	-1.92998	-0.00448563	-2.74071	#N/A	#N/A	#N/A	#N/A	#N/A	#N/A
CG32483	FBgn0052483	0.679318	0.976258	0.382378	-0.598435	-0.17077	-0.0675928	#N/A	#N/A	#N/A	#N/A	#N/A	#N/A
alphaKap4	FBgn0035657	0.678946	0.501342	0.85655	-1.31782	-0.683825	-3.98357	#N/A	#N/A	#N/A	#N/A	#N/A	#N/A
CG2183	FBgn0033273	0.678929	0.598917	0.758941	-0.020528	-0.224689	-0.178846	#N/A	#N/A	#N/A	#N/A	#N/A	#N/A
CG11475	FBgn0034687	0.677381	0.634301	0.720462	-0.0236858	-0.275418	-0.736102	#N/A	#N/A	#N/A	#N/A	#N/A	#N/A
CG33668	FBgn0053668	0.67714	0.489263	0.865017	0.379155	0.0514934	-2.56764	#N/A	#N/A	#N/A	#N/A	#N/A	#N/A
Jon74E	FBgn0023197	0.677032	0.957956	0.396108	-0.614038	-0.21307	-0.13039	0.630801	0.569656	0.691946	-0.32736	0.280741	-0.599689
l(2)41Ab	FBgn0262123	0.67672	0.507067	0.846374	-0.368381	-0.210056	-0.114328	#N/A	#N/A	#N/A	#N/A	#N/A	#N/A
CG17726	FBgn0037880	0.676045	0.631708	0.720381	-0.318078	-0.25927	-0.23727	0.0653761	0.0935217	0.0372306	-0.29516	-0.0434252	0.0258554
CG15543	FBgn0039799	0.675838	0.338759	1.01292	-1.475	-0.0926776	-3.21955	#N/A	#N/A	#N/A	#N/A	#N/A	#N/A
CG6576	FBgn0035924	0.675304	0.383615	0.966992	-1.63026	-0.000110953	-2.95249	#N/A	#N/A	#N/A	#N/A	#N/A	#N/A
CG7203	FBgn0031942	0.674628	0.414053	0.935203	-0.641842	-0.326436	-0.682086	0.60794	0.542138	0.673742	0.421705	0.662662	0.458695
CG6553	FBgn0033880	0.674318	0.991319	0.357317	0.251968	0.0619606	-0.0125807	#N/A	#N/A	#N/A	#N/A	#N/A	#N/A
CG18063	FBgn0028856	0.674202	0.362279	0.986125	-0.614149	-0.247791	-2.81966	#N/A	#N/A	#N/A	#N/A	#N/A	#N/A
CG1600	FBgn0033188	0.673734	0.593963	0.753505	0.0640744	0.00741601	-0.0623019	0.0605952	-0.066706	0.187896	0.118483	0.592448	0.426127
CG7024	FBgn0029722	0.671691	0.400339	0.943043	0.306077	0.0234346	-0.800705	1.21101	1.05571	1.3663	#DIV/0!	#DIV/0!	#DIV/0!
CG33490	FBgn0053490	0.67154	0.428431	0.914649	-0.471265	-0.541488	-2.2106	#N/A	#N/A	#N/A	#N/A	#N/A	#N/A
CG2137	FBgn0033190	0.671374	0.479159	0.863588	-0.0676621	-0.370838	-1.24279	0.283675	0.344959	0.222392	#DIV/0!	#DIV/0!	#DIV/0!
CG34355	FBgn0085384	0.670773	0.692353	0.649194	-0.0535261	0.426116	0.564215	0.414741	0.312724	0.516758	#DIV/0!	#DIV/0!	#DIV/0!
CG15283	FBgn0028844	0.670732	0.309582	1.03188	-1.06361	-0.187416	-3.26412	#N/A	#N/A	#N/A	#N/A	#N/A	#N/A
CG9722	FBgn0038209	0.670431	0.423013	0.917848	-1.04963	-0.457109	-2.77635	#N/A	#N/A	#N/A	#N/A	#N/A	#N/A
mRpS16	FBgn0033907	0.670233	0.707423	0.633043	-0.0821203	-0.0641915	-0.0571292	0.50821	0.326321	0.690099	#DIV/0!	#DIV/0!	#DIV/0!
CG13455	FBgn0036498	0.669582	0.337975	1.00119	0.2888	-0.116957	-0.943796	#N/A	#N/A	#N/A	#N/A	#N/A	#N/A
CG1774	FBgn0039856	0.667217	0.762049	0.572385	-0.213383	-0.135917	-0.187826	0.383701	0.525668	0.241734	-0.055719	0.178599	0.0546443
CG7886	FBgn0038248	0.666828	0.181727	1.15193	-0.219062	-0.40912	-2.41979	#N/A	#N/A	#N/A	#N/A	#N/A	#N/A
CG32819	FBgn0052819	0.666719	0.388192	0.945245	0.259974	-0.0996964	-1.27369	#N/A	#N/A	#N/A	#N/A	#N/A	#N/A
CG16972	FBgn0032481	0.666688	0.358737	0.97464	0.0209095	-0.0600123	-0.502673	#N/A	#N/A	#N/A	#N/A	#N/A	#N/A
CG42465	FBgn0259955	0.666145	0.0161372	1.31615	0.871549	0.645188	-1.18087	#N/A	#N/A	#N/A	#N/A	#N/A	#N/A
CG12338	FBgn0033543	0.665427	0.453236	0.877618	0.0440801	-0.00628602	0.0293293	0.0856133	-0.0163334	0.18756	-0.00599003	0.311476	0.548912
mir-2a-1	FBgn0262377	0.665213	0.78106	0.549367	0.0320217	-0.202537	-0.0719631	#N/A	#N/A	#N/A	#N/A	#N/A	#N/A
CG9903	FBgn0030756	0.665118	0.742651	0.587585	-1.85499	-0.00132479	0.175097	#N/A	#N/A	#N/A	#N/A	#N/A	#N/A
CG8306	FBgn0034142	0.66448	0.727329	0.601631	-0.0400114	-0.0550397	-0.0019792	0.741441	0.672662	0.810219	0.387264	0.194448	-0.412725
CR43939	FBgn0264567	0.663903	0.50237	0.825436	0.0322232	-0.337433	-1.80431	#N/A	#N/A	#N/A	#N/A	#N/A	#N/A
CG9634	FBgn0027528	0.66297	0.839313	0.486627	-0.0836398	-0.0433456	0.00663144	0.672325	0.586127	0.758524	-0.0291321	0.0954448	-0.312687
CG42808	FBgn0261990	0.662693	0.579266	0.746121	-0.123489	-0.107299	-0.110141	#N/A	#N/A	#N/A	#N/A	#N/A	#N/A
CG42841	FBgn0262030	0.661407	0.492346	0.830468	-1.73808	-0.651373	-3.00909	#N/A	#N/A	#N/A	#N/A	#N/A	#N/A
CG1971	FBgn0039881	0.660556	0.481411	0.839701	0.127982	0.0622155	-0.214985	#N/A	#N/A	#N/A	#N/A	#N/A	#N/A
Pdf	FBgn0023178	0.65998	0.811128	0.508832	-0.0999292	-0.127803	-0.0510376	#N/A	#N/A	#N/A	#N/A	#N/A	#N/A
CG15580	FBgn0037398	0.659195	0.43208	0.886311	-1.89781	-0.444812	-2.99434	#N/A	#N/A	#N/A	#N/A	#N/A	#N/A
Sirt4	FBgn0029783	0.659189	0.692527	0.625852	-0.0596101	-0.0539231	-0.00610665	0.0837479	0.180471	-0.0129748	-0.1016	0.0852046	0.21864
CG11815	FBgn0035299	0.65883	0.415833	0.901827	0.113818	-0.276508	-2.57896	#N/A	#N/A	#N/A	#N/A	#N/A	#N/A
CG18472	FBgn0039463	0.656532	0.492757	0.820306	0.0909261	-0.68597	-1.1971	#N/A	#N/A	#N/A	#N/A	#N/A	#N/A
yellow-e	FBgn0041711	0.654131	0.415173	0.893089	-0.0127784	-0.0757333	-0.00102904	0.319554	0.242892	0.396216	-0.0114213	0.0328636	0.0186082
CG43237	FBgn0262882	0.652775	0.3855	0.920051	-1.34408	-0.276592	-2.55712	#N/A	#N/A	#N/A	#N/A	#N/A	#N/A
CG4576	FBgn0038366	0.651542	1.05183	0.251249	1.26862	-0.510088	0.691714	#N/A	#N/A	#N/A	#N/A	#N/A	#N/A
Hexo1	FBgn0041630	0.651177	0.91663	0.385724	-0.0575659	-0.00729078	0.119221	-0.107763	-0.278181	0.0626545	#DIV/0!	#DIV/0!	#DIV/0!
Pka-C3	FBgn0000489	0.650273	0.64674	0.653807	0.0431529	-0.126312	-0.144451	-0.00827129	0.0175641	-0.0341066	-0.247093	-0.420363	-0.369849
Tim17a1	FBgn0038018	0.649978	0.22844	1.07152	-0.0542204	0.153583	-3.63978	#N/A	#N/A	#N/A	#N/A	#N/A	#N/A
CG12541	FBgn0029930	0.649262	1.07406	0.224467	-0.25345	-0.511699	-0.205512	#N/A	#N/A	#N/A	#N/A	#N/A	#N/A
CG13326	FBgn0033794	0.648874	0.354061	0.943687	-0.377363	-0.496133	-2.85087	#N/A	#N/A	#N/A	#N/A	#N/A	#N/A
CR43610	FBgn0263585	0.648625	0.110296	1.18695	-0.21714	-0.0352977	-0.468057	#N/A	#N/A	#N/A	#N/A	#N/A	#N/A
CG7362	FBgn0038258	0.647988	0.374672	0.921303	-1.4173	-0.119408	-3.34672	#N/A	#N/A	#N/A	#N/A	#N/A	#N/A
Vha36-3	FBgn0040377	0.647815	0.615514	0.680116	0.105398	0.05226	0.06614	0.328155	0.314808	0.341501	-0.0771498	0.279688	0.110321
CG7208	FBgn0038575	0.647627	0.459439	0.835816	0.0880295	-0.323497	-1.76888	#N/A	#N/A	#N/A	#N/A	#N/A	#N/A
CG3748	FBgn0032110	0.646919	0.34765	0.946188	-2.13048	-0.072958	-4.35064	#N/A	#N/A	#N/A	#N/A	#N/A	#N/A
CG30060	FBgn0050060	0.646215	0.490128	0.802301	0.0975776	-0.322095	-1.19315	#N/A	#N/A	#N/A	#N/A	#N/A	#N/A
CG43331	FBgn0263036	0.645988	0.336278	0.955698	-2.02993	-0.286034	-3.74608	#N/A	#N/A	#N/A	#N/A	#N/A	#N/A
CG9921	FBgn0030743	0.644935	0.645516	0.644354	-0.160827	0.0467753	0.0867969	0.610443	0.779578	0.441309	0.184636	0.362546	0.572664
Cyp28d1	FBgn0031689	0.644728	0.671517	0.61794	-0.0662311	0.0222216	0.130993	0.354537	0.440514	0.268561	-0.177762	0.016616	-0.0278339
CG14546	FBgn0039395	0.644686	0.41795	0.871423	-1.28702	-0.320871	-3.10704	#N/A	#N/A	#N/A	#N/A	#N/A	#N/A
CR43905	FBgn0264506	0.644583	0.181988	1.10718	-1.11631	0.0632192	-4.16474	#N/A	#N/A	#N/A	#N/A	#N/A	#N/A
CG32117	FBgn0052117	0.643891	0.417881	0.869901	-0.445047	-0.383173	-2.77996	#N/A	#N/A	#N/A	#N/A	#N/A	#N/A
Nup58	FBgn0038722	0.643673	0.671451	0.615895	0.399418	0.238189	0.22925	0.0480767	0.0214216	0.0747319	0.197221	0.254594	0.188384
CG32302	FBgn0052302	0.643632	1.30719	-0.0199259	1.58379	0.229195	0.619044	#N/A	#N/A	#N/A	#N/A	#N/A	#N/A
CG31525	FBgn0051525	0.643604	0.373007	0.914201	0.861467	-0.393725	-1.07952	#N/A	#N/A	#N/A	#N/A	#N/A	#N/A
CG30271	FBgn0050271	0.642683	0.441116	0.84425	-0.142204	-0.303236	-0.5022	0.232315	0.18454	0.280089	#DIV/0!	0.737012	0.226268
CG9509	FBgn0030594	0.642186	0.416538	0.867834	-0.593741	0.0567311	-0.0313534	0.418794	0.309519	0.528069	-1.59262	0.313156	0.528139
Jon65Aii	FBgn0035666	0.642157	-0.170652	1.45497	-3.45408	-0.197443	-0.648996	#N/A	#N/A	#N/A	#N/A	#N/A	#N/A
CG18233	FBgn0036795	0.641642	-0.312277	1.59556	-0.88774	1.53281	-0.691539	#N/A	#N/A	#N/A	#N/A	#N/A	#N/A
CG3215	FBgn0034825	0.641133	0.407725	0.874541	-1.06246	-0.191281	-3.6255	#N/A	#N/A	#N/A	#N/A	#N/A	#N/A
CG11634	FBgn0032968	0.639164	0.438406	0.839921	-2.05212	-0.584916	-3.33857	#N/A	#N/A	#N/A	#N/A	#N/A	#N/A
CG15498	FBgn0038892	0.638959	0.250287	1.02763	-0.922167	-0.225081	-2.42899	#N/A	#N/A	#N/A	#N/A	#N/A	#N/A
CG3939	FBgn0040396	0.638921	0.744514	0.533329	-0.0755031	-0.00755243	0.00300171	0.534292	0.479818	0.588766	-0.0992283	0.236517	0.289502
CG42570	FBgn0260776	0.638454	0.243225	1.03368	-1.88824	-0.452142	-3.23071	#N/A	#N/A	#N/A	#N/A	#N/A	#N/A
CG3955	FBgn0033793	0.638293	0.768439	0.508148	-0.434456	-0.294319	-0.237144	#N/A	#N/A	#N/A	#N/A	#N/A	#N/A
fh	FBgn0030092	0.638269	0.704093	0.572445	-0.059441	0.0172651	0.0524665	0.127817	0.257733	-0.00209829	0.098502	-0.0537874	0.0512144
l(2)06225	FBgn0010612	0.636999	0.559427	0.714572	-0.19489	-0.150896	-0.1443	0.186972	0.216278	0.157666	-0.16754	-0.179301	-0.151078
Obp57b	FBgn0043534	0.636846	1.47464	-0.200951	0.201332	-0.14519	0.501407	#N/A	#N/A	#N/A	#N/A	#N/A	#N/A
orb	FBgn0004882	0.636389	0.0783962	1.19438	0.390505	0.377119	-1.2388	#N/A	#N/A	#N/A	#N/A	#N/A	#N/A
CG8197	FBgn0033369	0.634791	0.341068	0.928514	-0.759331	-0.226473	-3.00068	#N/A	#N/A	#N/A	#N/A	#N/A	#N/A
CG30222	FBgn0050222	0.634342	0.304031	0.964653	-0.0584629	0.0369911	-2.26393	#N/A	#N/A	#N/A	#N/A	#N/A	#N/A
CG11617	FBgn0031232	0.634235	0.636731	0.631739	-0.332944	-0.283061	-0.255907	#N/A	#N/A	#N/A	#N/A	#N/A	#N/A
CG34454	FBgn0085483	0.633625	0.722687	0.544564	-0.0106119	-0.133506	-0.0244846	0.281006	0.261338	0.300674	0.378792	0.486533	0.817804
CG14270	FBgn0029665	0.633388	0.586531	0.680245	-0.0832982	-0.0291214	-0.00666851	-1.17414	-1.03305	-1.31524	#DIV/0!	#DIV/0!	#DIV/0!
Gclm	FBgn0046114	0.632385	0.66573	0.59904	0.0301514	0.05482	0.0312843	0.571307	0.47543	0.667183	0.126893	0.141423	0.186787
CG13177	FBgn0040759	0.631901	1.00983	0.25397	-0.406878	-0.363056	-0.450954	0.417243	0.824366	0.0101197	0.138774	0.111732	0.28106
CG13056	FBgn0040794	0.630692	0.572733	0.688652	-0.0903152	0.0452773	-0.0308006	#N/A	#N/A	#N/A	#N/A	#N/A	#N/A
CG32238	FBgn0052238	0.629747	0.294815	0.964679	-1.01354	-0.495274	-2.2057	#N/A	#N/A	#N/A	#N/A	#N/A	#N/A
CG6125	FBgn0038337	0.629377	0.43113	0.827625	-0.167091	0.029096	-0.00500725	0.838358	0.428999	1.24772	0.119927	0.169499	-0.240065
CoVIIc	FBgn0040773	0.628115	0.546572	0.709657	-0.188627	-0.0958525	-0.0801037	#N/A	#N/A	#N/A	#N/A	#N/A	#N/A
CG1681	FBgn0030484	0.627983	0.761454	0.494512	-0.053464	0.0301727	0.0699842	0.422171	0.350697	0.493644	-0.0464252	0.542428	0.650466
CG14269	FBgn0029658	0.627969	0.451024	0.804915	-0.685458	-0.363275	-2.75468	#N/A	#N/A	#N/A	#N/A	#N/A	#N/A
CG33138	FBgn0053138	0.627514	0.626	0.629027	-0.143781	-0.0921568	-0.114184	0.0610562	0.0819367	0.0401758	0.0427714	0.0912368	0.130819
CG42824	FBgn0262006	0.627216	0.0907512	1.16368	0.154844	0.832316	-0.879904	#N/A	#N/A	#N/A	#N/A	#N/A	#N/A
CG13436	FBgn0034532	0.627029	0.495107	0.758952	-0.0126274	-0.404748	-0.903062	#N/A	#N/A	#N/A	#N/A	#N/A	#N/A
CG2209	FBgn0030441	0.626918	0.412609	0.841227	-0.727193	-0.277993	-2.69278	#N/A	#N/A	#N/A	#N/A	#N/A	#N/A
CG11110	FBgn0034535	0.62669	0.643176	0.610203	-0.188329	-0.149431	-0.150974	0.197517	0.278969	0.116066	-0.492175	-0.225846	-0.109609
Muc30E	FBgn0053300	0.625596	-0.0726471	1.32384	1.39395	0.381043	0.0105743	#N/A	#N/A	#N/A	#N/A	#N/A	#N/A
CG7276	FBgn0036499	0.625527	0.374517	0.876537	-1.07467	-0.678228	-3.19793	#N/A	#N/A	#N/A	#N/A	#N/A	#N/A
CG9427	FBgn0037721	0.625322	0.189595	1.06105	0.272792	0.261399	-0.412065	0.651564	0.562588	0.74054	#DIV/0!	#DIV/0!	#DIV/0!
CG7856	FBgn0033056	0.625247	0.325886	0.924607	-1.28266	-0.54833	-3.11367	#N/A	#N/A	#N/A	#N/A	#N/A	#N/A
CG15362	FBgn0031378	0.624511	0.593719	0.655303	0.039042	-0.140754	-0.140102	#N/A	#N/A	#N/A	#N/A	#N/A	#N/A
Neb-cGP	FBgn0083167	0.624217	0.491573	0.756861	-0.179024	-0.0972051	-0.0768978	-0.40195	-0.100264	-0.703636	-0.0868919	0.218996	0.697534
CG15278	FBgn0032554	0.623847	0.349865	0.897829	-1.86432	-0.123644	-3.01504	#N/A	#N/A	#N/A	#N/A	#N/A	#N/A
CG5548	FBgn0030605	0.623518	0.550895	0.696141	-0.26526	-0.24368	-0.2972	0.106634	0.167558	0.0457102	-0.0886673	-0.112769	-0.0921593
CG8712	FBgn0033258	0.623464	0.378096	0.868833	0.0163087	-0.298906	-0.691273	#N/A	#N/A	#N/A	#N/A	#N/A	#N/A
CG9459	FBgn0037764	0.623033	1.30765	-0.0615873	-0.197666	-0.309666	-0.0481572	#N/A	#N/A	#N/A	#N/A	#N/A	#N/A
CG5397	FBgn0031327	0.622537	0.85483	0.390245	0.0621329	-0.0417728	0.05279	-0.379667	-0.481437	-0.277898	-0.180522	0.0163146	0.215255
CG4661	FBgn0030429	0.622254	0.321977	0.922532	-1.76391	-0.230069	-3.73154	#N/A	#N/A	#N/A	#N/A	#N/A	#N/A
CG12400	FBgn0031505	0.621908	0.575678	0.668138	-0.193051	-0.0841995	-0.0513093	0.0304683	0.125243	-0.0643064	-0.0961811	-0.158687	-0.122342
Corp	FBgn0030028	0.621444	0.728573	0.514315	0.431298	-0.322439	-0.462715	#N/A	#N/A	#N/A	#N/A	#N/A	#N/A
CG14346	FBgn0031337	0.621374	0.341054	0.901695	0.201903	-0.130687	-3.0207	#N/A	#N/A	#N/A	#N/A	#N/A	#N/A
CG2616	FBgn0037512	0.620703	0.31716	0.924246	-2.32816	-0.296962	-3.6195	#N/A	#N/A	#N/A	#N/A	#N/A	#N/A
CG3408	FBgn0036008	0.620615	0.472119	0.769111	0.0877916	-0.0817905	-0.115301	#N/A	#N/A	#N/A	#N/A	#N/A	#N/A
CG7349	FBgn0030975	0.619232	0.0334969	1.20497	0.665322	-0.0645113	-0.854058	0.219121	0.243921	0.194321	-0.271609	-0.0314995	0.157029
CG4095	FBgn0029890	0.619003	0.413558	0.824448	-0.0350972	-0.606246	-1.13532	0.108647	0.15504	0.0622535	-0.000466555	0.0344243	0.140379
CG42684	FBgn0261570	0.617434	0.0489211	1.18595	-0.00268835	-0.0292914	-0.0318033	0.202951	0.157677	0.248225	#DIV/0!	#DIV/0!	#DIV/0!
CG3394	FBgn0034999	0.615947	0.419904	0.811991	-0.154261	-0.0709357	-0.0740256	0.590234	0.670618	0.509851	-0.230834	-0.982918	-0.813557
CG17032	FBgn0036547	0.615707	0.699355	0.53206	-0.084146	-0.0892131	-0.114768	0.628786	0.660818	0.596754	-0.226271	-0.404901	-0.250764
CG11035	FBgn0037544	0.615707	0.608453	0.62296	-0.193009	-0.0317599	0.0189037	0.663612	0.658353	0.668871	-0.408605	-0.0345726	-0.251843
CG1979	FBgn0026563	0.615191	0.503908	0.726473	-0.162302	0.0262318	-0.132398	#N/A	#N/A	#N/A	#N/A	#N/A	#N/A
CG3214	FBgn0031436	0.614561	0.66609	0.563032	-0.142422	-0.106711	-0.0483508	0.14045	0.217217	0.063682	-0.407138	-0.183442	-0.0854574
CG6059	FBgn0039491	0.614472	0.212155	1.01679	-0.00719715	-0.0248932	-1.35385	#N/A	#N/A	#N/A	#N/A	#N/A	#N/A
Oscp	FBgn0016691	0.614046	0.555052	0.67304	-0.228979	-0.146555	-0.154352	0.130879	0.157257	0.104501	-0.165246	-0.0539878	0.0822592
CG4907	FBgn0039010	0.613911	0.109932	1.11789	1.27352	0.370057	-0.773802	#N/A	#N/A	#N/A	#N/A	#N/A	#N/A
CG42703	FBgn0261614	0.612683	0.208642	1.01672	-1.07424	-0.124789	-2.26166	#N/A	#N/A	#N/A	#N/A	#N/A	#N/A
CG7514	FBgn0035567	0.612673	0.304187	0.92116	-1.56631	-0.441414	-3.44518	1.56437	1.4214	1.70735	#DIV/0!	#DIV/0!	#DIV/0!
obst-A	FBgn0031097	0.612405	0.643175	0.581634	-0.14583	-0.316901	-0.394973	0.631396	0.730235	0.532557	-0.191514	-0.352003	-0.242029
CG6893	FBgn0036807	0.611479	0.432303	0.790654	-1.11441	-0.669892	-2.53094	#N/A	#N/A	#N/A	#N/A	#N/A	#N/A
Ugt86Dd	FBgn0040256	0.610576	0.803398	0.417754	-0.109422	0.0160202	0.0582693	0.423705	0.444652	0.402758	-0.232874	0.140326	0.0844453
Ucp4A	FBgn0030872	0.610259	0.669095	0.551423	-0.254099	-0.243356	-0.238214	0.361697	0.518274	0.20512	0.0307662	-0.198656	-0.450435
CG31730	FBgn0051730	0.609194	0.484431	0.733957	-0.241728	-0.913762	-1.69033	#N/A	#N/A	#N/A	#N/A	#N/A	#N/A
CG33282	FBgn0053282	0.608944	0.585517	0.63237	-1.01291	0.284933	0.342649	#N/A	#N/A	#N/A	#N/A	#N/A	#N/A
CG14661	FBgn0037288	0.607522	0.752206	0.462838	-0.0958649	-0.137644	-0.11982	0.189441	0.325479	0.0534031	0.219809	0.207633	0.0164728
CG15547	FBgn0039809	0.607273	0.0328847	1.18166	0.370563	0.121533	0.0899658	#N/A	#N/A	#N/A	#N/A	#N/A	#N/A
CG42821	FBgn0262003	0.606712	1.19908	0.0143399	0.355795	0.0127226	0.11388	0.615009	1.11455	0.115463	0.48128	0.615303	-0.162854
DAT	FBgn0034136	0.606412	0.344161	0.868663	-0.191226	0.167603	-0.00131904	0.17158	0.0876348	0.255526	#DIV/0!	#DIV/0!	#DIV/0!
CG7394	FBgn0036173	0.606368	0.606102	0.606634	-0.061503	-0.0861439	-0.0517624	0.314211	0.364414	0.264008	-0.562221	-0.253089	-0.243947
CG13541	FBgn0034841	0.605798	0.302411	0.909186	-2.6969	-0.310978	-3.03872	#N/A	#N/A	#N/A	#N/A	#N/A	#N/A
CG9034	FBgn0040931	0.604959	0.576701	0.633216	-0.135811	-0.0509865	-0.0225493	0.147763	0.208078	0.0874473	-0.206676	-0.0623473	0.0751107
CG4363	FBgn0034663	0.603772	0.75141	0.456133	-0.0916965	0.0523079	0.0847062	1.35089	1.12398	1.57779	-0.764924	-0.252605	-0.263337
l(3)neo43	FBgn0011476	0.603572	0.54596	0.661183	-0.222458	-0.0916065	-0.0307818	0.653401	0.542327	0.764476	-0.302935	0.164477	0.284459
GstE3	FBgn0063497	0.600736	0.531905	0.669567	-0.136708	-0.0253751	-0.0117262	0.52646	0.361852	0.691068	-0.0334225	0.328934	0.444972
CG2021	FBgn0035271	0.598741	0.621983	0.575499	0.17358	0.0322365	0.0825543	-0.0678016	-0.0324086	-0.103195	0.00979118	0.000695885	0.262926
CG31693	FBgn0051693	0.598535	0.314437	0.882633	-2.39418	-0.240983	-4.64719	#N/A	#N/A	#N/A	#N/A	#N/A	#N/A
pyd3	FBgn0037513	0.597297	0.556311	0.638283	-0.115448	-0.0160913	0.0393511	0.678015	0.469975	0.886055	-0.0815341	0.0102667	0.0650168
CG11369	FBgn0029951	0.597076	0.312101	0.88205	-2.58433	-0.179309	-3.41272	#N/A	#N/A	#N/A	#N/A	#N/A	#N/A
CG43196	FBgn0262825	0.596759	1.15086	0.0426548	-0.235799	-0.308843	0.00372967	#N/A	#N/A	#N/A	#N/A	#N/A	#N/A
Gpa2	FBgn0261386	0.594271	0.569015	0.619526	0.0815551	0.0296662	0.126171	#N/A	#N/A	#N/A	#N/A	#N/A	#N/A
CG32820	FBgn0052820	0.593384	0.212047	0.974721	0.177535	0.060237	-1.36617	#N/A	#N/A	#N/A	#N/A	#N/A	#N/A
CG3323	FBgn0029750	0.593064	0.180683	1.00544	-0.00912782	-0.377761	-1.58628	#N/A	#N/A	#N/A	#N/A	#N/A	#N/A
CG11368	FBgn0040923	0.592429	0.484175	0.700682	-0.288671	-0.0297223	-0.0380475	#N/A	#N/A	#N/A	#N/A	#N/A	#N/A
CG41562	FBgn0085693	0.592069	0.421786	0.762352	0.660488	-0.716687	-1.48394	#N/A	#N/A	#N/A	#N/A	#N/A	#N/A
CG42765	FBgn0261833	0.590556	0.832724	0.348388	0.24013	0.0321097	0.456511	#N/A	#N/A	#N/A	#N/A	#N/A	#N/A
CG43249	FBgn0262894	0.589608	0.451784	0.727432	-1.12174	-0.254265	-2.59601	#N/A	#N/A	#N/A	#N/A	#N/A	#N/A
CG17648	FBgn0031364	0.58941	0.393448	0.785372	-0.491859	-0.40173	-2.37238	#N/A	#N/A	#N/A	#N/A	#N/A	#N/A
CG32643	FBgn0052643	0.589031	0.405175	0.772887	-0.99601	-0.230534	-2.10355	#N/A	#N/A	#N/A	#N/A	#N/A	#N/A
CG17450	FBgn0040028	0.588971	0.257415	0.920527	1.04525	0.224107	-1.15992	1.49424	1.27561	1.71286	1.02897	0.304681	0.378702
CG11700	FBgn0029856	0.5885	-0.382532	1.55953	0.798131	-0.0218209	0.104706	-0.144827	-0.123784	-0.165869	0.0477743	-0.0316464	0.0299091
Muc68D	FBgn0036203	0.588496	1.11574	0.0612476	0.119321	-0.00181844	0.194914	#N/A	#N/A	#N/A	#N/A	#N/A	#N/A
CG15578	FBgn0040905	0.588458	0.436268	0.740648	-0.299353	-0.233178	-2.52243	#N/A	#N/A	#N/A	#N/A	#N/A	#N/A
CG8252	FBgn0033344	0.587718	0.230211	0.945225	0.164551	-0.38046	-1.34823	#N/A	#N/A	#N/A	#N/A	#N/A	#N/A
CG14763	FBgn0033243	0.587443	0.535553	0.639333	-0.0380855	-0.114883	-0.369085	#N/A	#N/A	#N/A	#N/A	#N/A	#N/A
CG1950	FBgn0030370	0.586355	0.32386	0.848851	-0.478052	-0.286297	-2.85611	#N/A	#N/A	#N/A	#N/A	#N/A	#N/A
OS9	FBgn0042129	0.586338	0.484683	0.687994	-0.123797	-0.0263949	-0.0421038	#N/A	#N/A	#N/A	#N/A	#N/A	#N/A
CG5509	FBgn0038054	0.586168	0.417325	0.755012	0.369678	-0.36732	-1.0967	#N/A	#N/A	#N/A	#N/A	#N/A	#N/A
CG32806	FBgn0052806	0.585937	0.375988	0.795885	-1.54002	-0.525658	-2.61616	#N/A	#N/A	#N/A	#N/A	#N/A	#N/A
CG14183	FBgn0036931	0.585869	0.20084	0.970897	0.456809	0.0179021	-1.18506	#N/A	#N/A	#N/A	#N/A	#N/A	#N/A
CG18327	FBgn0033904	0.585633	0.587626	0.58364	-0.533932	-0.111415	-0.266622	-0.171608	-0.10179	-0.241426	#DIV/0!	#DIV/0!	#DIV/0!
CG31549	FBgn0051549	0.585585	0.663125	0.508045	0.0939021	0.0598713	0.0857285	0.772559	0.725504	0.819614	-0.0493132	0.1975	0.249813
CG42851	FBgn0262098	0.585303	0.266191	0.904414	-1.4232	-0.185894	-2.23924	#N/A	#N/A	#N/A	#N/A	#N/A	#N/A
l(3)87Df	FBgn0002354	0.584923	0.681807	0.488039	-0.192581	-0.107435	-0.0160935	0.411767	0.452999	0.370535	-0.31251	-0.110124	-0.371045
CG10561	FBgn0002036	0.584136	0.681814	0.486459	-0.114795	-0.0502529	-0.0784265	-0.0112894	-0.17352	0.150941	#DIV/0!	#DIV/0!	#DIV/0!
Desi	FBgn0037832	0.583969	0.304063	0.863875	-0.394045	-0.553789	-0.378757	#N/A	#N/A	#N/A	#N/A	#N/A	#N/A
CG34286	FBgn0085315	0.583884	0.318001	0.849767	-0.298035	-0.576173	-2.5252	#N/A	#N/A	#N/A	#N/A	#N/A	#N/A
CNT1	FBgn0033371	0.583223	0.365203	0.801242	-1.44945	-0.356659	-2.20797	#N/A	#N/A	#N/A	#N/A	#N/A	#N/A
CG4409	FBgn0034128	0.583005	0.591602	0.574408	0.231037	0.055606	0.109373	#N/A	#N/A	#N/A	#N/A	#N/A	#N/A
dpr17	FBgn0051361	0.582989	0.304246	0.861732	-0.288344	-0.192907	-0.749421	#N/A	#N/A	#N/A	#N/A	#N/A	#N/A
CG7402	FBgn0036768	0.58298	0.712929	0.453032	-0.0763064	0.00697532	0.129692	#N/A	#N/A	#N/A	#N/A	#N/A	#N/A
Acon	FBgn0010100	0.582805	0.441399	0.72421	-0.299904	-0.138993	-0.168822	0.291064	0.298219	0.283909	-0.226647	-0.0779339	0.0821151
CG9231	FBgn0036887	0.582664	0.595726	0.569603	-0.197451	-0.0472346	-0.0148549	0.319988	0.372442	0.267533	0.0493837	0.095196	-0.135044
Pfk	FBgn0003071	0.582484	0.452961	0.712008	-0.221623	-0.212576	-0.291659	-0.0261045	0.0128647	-0.0650737	-0.156342	-0.161209	-0.0940839
CG3683	FBgn0035046	0.58167	0.483286	0.680053	-0.296338	-0.205836	-0.243562	0.144691	0.21399	0.0753925	-0.145411	-0.0819584	0.0432651
CG31115	FBgn0051115	0.581252	0.350247	0.812257	0.334975	0.040464	-0.430086	0.418777	0.401772	0.435781	#DIV/0!	#DIV/0!	#DIV/0!
CG15922	FBgn0040575	0.581017	0.579437	0.582597	-0.149334	-0.0783239	-0.0168272	0.540491	0.662084	0.418898	#DIV/0!	#DIV/0!	#DIV/0!
CG16904	FBgn0037763	0.580539	1.18779	-0.0267111	-0.119542	-0.123416	-0.011682	#N/A	#N/A	#N/A	#N/A	#N/A	#N/A
CG12147	FBgn0037325	0.580354	0.303534	0.857174	-1.89036	-0.46127	-3.34254	#N/A	#N/A	#N/A	#N/A	#N/A	#N/A
CG5171	FBgn0031907	0.579522	0.434751	0.724294	-0.0224832	0.00584647	0.0715823	0.44501	0.295178	0.594841	0.151039	0.19727	0.40748
CG12684	FBgn0029717	0.577329	0.288306	0.866353	-1.72438	-0.235704	-2.2228	#N/A	#N/A	#N/A	#N/A	#N/A	#N/A
KCNQ	FBgn0033494	0.576711	0.66254	0.490882	-0.286336	-0.0028298	0.0707658	#N/A	#N/A	#N/A	#N/A	#N/A	#N/A
CG10802	FBgn0029664	0.576635	0.462758	0.690511	-0.136943	-0.282212	-0.326714	-0.195323	-0.040066	-0.350581	-0.133091	-0.132279	0.111991
Obp56i	FBgn0043532	0.575988	0.0371558	1.11482	-1.71754	0.427886	-1.2823	#N/A	#N/A	#N/A	#N/A	#N/A	#N/A
CG16852	FBgn0028942	0.573881	0.378289	0.769472	-0.303139	-0.75272	-2.73045	#N/A	#N/A	#N/A	#N/A	#N/A	#N/A
CG4452	FBgn0035981	0.57266	0.694827	0.450492	-0.182799	-0.315303	-0.220831	0.125578	0.102155	0.149001	-0.44911	-0.351529	-0.292334
retinin	FBgn0040074	0.572588	0.826915	0.31826	0.751716	-2.27848	-0.282088	#N/A	#N/A	#N/A	#N/A	#N/A	#N/A
CG4960	FBgn0039371	0.570345	0.312525	0.828166	0.231366	-0.200315	-2.74298	0.479178	0.431499	0.526856	0.795265	0.142128	-0.427616
Diedel3	FBgn0085358	0.56941	0.552832	0.585987	-0.989414	-0.017283	-0.0939004	1.17652	1.49842	0.854621	#DIV/0!	#DIV/0!	#DIV/0!
CG3528	FBgn0031430	0.568136	0.326079	0.810192	-1.92618	-0.563976	-2.55159	#N/A	#N/A	#N/A	#N/A	#N/A	#N/A
mir-2a-2	FBgn0262460	0.568003	0.622125	0.513881	-0.0564859	-0.100917	-0.0288411	#N/A	#N/A	#N/A	#N/A	#N/A	#N/A
CG13564	FBgn0034973	0.566438	0.293386	0.83949	0.186219	-0.275625	-1.61498	#N/A	#N/A	#N/A	#N/A	#N/A	#N/A
CG14687	FBgn0037835	0.566038	0.546487	0.58559	-0.163352	-0.150245	-0.141772	#DIV/0!	#DIV/0!	#DIV/0!	#DIV/0!	#DIV/0!	#DIV/0!
CG3560	FBgn0030733	0.565978	0.540885	0.59107	-0.190689	-0.108287	-0.0961997	0.144669	0.196201	0.093137	0.0366014	0.0201282	0.224105
CG1814	FBgn0033426	0.56591	0.591372	0.540448	-0.0278336	-0.0599706	-0.0751524	0.468421	0.542894	0.393948	0.18077	0.281543	0.369761
l(2)tid	FBgn0002174	0.564992	0.60493	0.525054	-0.0200105	0.0409786	0.0112794	0.0173571	0.0283376	0.00637652	-0.250048	-0.00127628	0.0806907
CG12119	FBgn0030102	0.564369	0.54401	0.584728	-0.109839	-0.0938085	-0.161964	0.48926	0.421709	0.556811	0.501706	0.405668	0.320606
CG31076	FBgn0051076	0.563333	0.786049	0.340616	-0.689052	0.0732882	0.289068	#N/A	#N/A	#N/A	#N/A	#N/A	#N/A
CG17323	FBgn0032713	0.563324	0.40155	0.725097	-0.301538	-0.404215	-0.394635	0.0856344	0.0378456	0.133423	0.146911	-0.0772746	-0.179504
snoRNA:U3:54Ab	FBgn0065047	0.563261	1.90249	-0.775967	1.67226	-0.377855	1.35526	#N/A	#N/A	#N/A	#N/A	#N/A	#N/A
l(2)k14505	FBgn0021856	0.56266	0.706402	0.418918	-0.235879	-0.0653004	0.0667607	0.110348	0.147621	0.0730743	-0.305173	-0.0838542	0.122794
CG33125	FBgn0053125	0.562061	0.246027	0.878096	-2.67036	0.00290634	-4.30703	#N/A	#N/A	#N/A	#N/A	#N/A	#N/A
CG13255	FBgn0040636	0.561579	0.525639	0.597519	-0.111703	-0.0708646	-0.0853588	#N/A	#N/A	#N/A	#N/A	#N/A	#N/A
polo	FBgn0003124	0.561242	0.135535	0.986949	1.45662	0.23998	-0.40545	#N/A	#N/A	#N/A	#N/A	#N/A	#N/A
CG31924	FBgn0051924	0.561062	0.307877	0.814246	-0.431435	-0.290678	-2.35441	#N/A	#N/A	#N/A	#N/A	#N/A	#N/A
CG34446	FBgn0085475	0.56099	0.285628	0.836353	-0.445787	-0.352398	-0.291215	#N/A	#N/A	#N/A	#N/A	#N/A	#N/A
kat-60L1	FBgn0037375	0.560248	0.340918	0.779578	-0.129786	-0.130306	-0.571399	#N/A	#N/A	#N/A	#N/A	#N/A	#N/A
CG5050	FBgn0032637	0.558977	0.101382	1.01657	0.242993	-0.238847	-1.63399	#N/A	#N/A	#N/A	#N/A	#N/A	#N/A
CG6083	FBgn0036183	0.558872	0.642916	0.474829	-0.434327	-0.227885	-0.234763	-0.0923648	0.048248	-0.232977	-0.0922654	0.0936982	0.21023
Mal-A6	FBgn0050360	0.558816	0.976901	0.140732	-0.159676	0.044031	0.115905	0.865959	0.894167	0.837752	-1.08087	0.749192	0.290201
mRpL10	FBgn0031231	0.558812	0.508304	0.609321	0.00500188	-0.0214175	0.0665287	0.988163	0.651492	1.32483	#DIV/0!	#DIV/0!	#DIV/0!
Cyp4aa1	FBgn0034053	0.558593	1.44325	-0.326061	0.202571	-0.227585	0.940565	#N/A	#N/A	#N/A	#N/A	#N/A	#N/A
CG34287	FBgn0085316	0.558553	0.445979	0.671127	-0.187805	-0.283629	-1.75134	#N/A	#N/A	#N/A	#N/A	#N/A	#N/A
metl	FBgn0035247	0.558262	0.720625	0.395898	-0.00331645	0.0398539	0.166288	#N/A	#N/A	#N/A	#N/A	#N/A	#N/A
CG32628	FBgn0052628	0.557868	0.318384	0.797351	-0.218037	-0.399714	-0.591481	#N/A	#N/A	#N/A	#N/A	#N/A	#N/A
Gfat1	FBgn0027341	0.557779	0.646807	0.46875	-0.0186588	-0.0912155	-0.0676582	0.0743298	0.0460604	0.102599	-0.462615	0.186636	-0.0339073
CG32750	FBgn0052750	0.557722	-0.228815	1.34426	-1.18894	-0.174608	-0.0403381	#N/A	#N/A	#N/A	#N/A	#N/A	#N/A
Obp56g	FBgn0034474	0.557547	0.358035	0.75706	-0.4129	-0.0139982	-0.039394	-1.72544	-1.75735	-1.69352	0.30598	0.371571	0.590863
CG11226	FBgn0037195	0.557494	0.261836	0.853151	0.63698	0.197412	-0.56725	#N/A	#N/A	#N/A	#N/A	#N/A	#N/A
CG6465	FBgn0037818	0.557371	0.536597	0.578146	-0.244864	-0.0159949	-0.0430879	0.20811	0.326487	0.0897336	-0.185608	0.191739	0.45711
CG14483	FBgn0034248	0.557015	0.600171	0.51386	-0.0501358	-0.0211743	0.0388452	1.1201	1.24579	0.994415	-0.0764665	-0.264731	0.358714
CG31088	FBgn0051088	0.55696	0.2565	0.857419	-0.337409	-0.329089	-1.87252	#N/A	#N/A	#N/A	#N/A	#N/A	#N/A
CG13144	FBgn0032260	0.555995	0.508162	0.603828	-0.401012	-0.238314	-0.330936	0.0623607	0.0558457	0.0688757	-0.191855	0.119419	-0.041644
Pros28.1B	FBgn0017556	0.554819	0.241665	0.867972	0.0903145	-0.157084	-1.63084	#N/A	#N/A	#N/A	#N/A	#N/A	#N/A
mRpL34	FBgn0083983	0.554322	0.514507	0.594137	-0.241256	-0.110753	-0.0921611	#N/A	#N/A	#N/A	#N/A	#N/A	#N/A
CG5028	FBgn0039358	0.553837	0.431017	0.676657	-0.1429	-0.0551015	-0.10016	0.0204954	0.00431678	0.0366739	-0.0727832	-0.0383192	0.0590811
CG18368	FBgn0033864	0.553706	0.209567	0.897844	-2.14949	-0.255262	-3.56224	#N/A	#N/A	#N/A	#N/A	#N/A	#N/A
Taf12L	FBgn0031623	0.552402	0.471717	0.633088	2.56413	-2.22879	-0.955439	#N/A	#N/A	#N/A	#N/A	#N/A	#N/A
CG17195	FBgn0039369	0.552355	0.307552	0.797159	-1.19891	-0.374924	-3.33737	#N/A	#N/A	#N/A	#N/A	#N/A	#N/A
CG9624	FBgn0038213	0.552328	0.237105	0.867551	0.440579	-0.270148	-0.96499	#N/A	#N/A	#N/A	#N/A	#N/A	#N/A
CG14259	FBgn0039483	0.552285	0.673347	0.431222	-0.252323	-0.0752932	-0.0577724	0.308979	0.445167	0.172791	-0.259648	-0.0244319	0.132471
CG10348	FBgn0032707	0.552203	0.773632	0.330773	-0.321872	-0.127079	-0.042245	#N/A	#N/A	#N/A	#N/A	#N/A	#N/A
CG30049	FBgn0050049	0.551477	0.893147	0.209807	-1.34687	0.0700697	0.614194	#N/A	#N/A	#N/A	#N/A	#N/A	#N/A
CG11093	FBgn0039932	0.551202	0.125783	0.976621	0.692659	0.33337	0.3585	#N/A	#N/A	#N/A	#N/A	#N/A	#N/A
CG12479	FBgn0040871	0.550585	0.245314	0.855856	-0.648493	0.0177311	-2.64557	#N/A	#N/A	#N/A	#N/A	#N/A	#N/A
Lk	FBgn0028418	0.55015	0.561769	0.53853	0.104504	-0.0093996	-0.0372709	0.207204	0.36279	0.0516184	0.201613	0.378935	0.568492
CG12516	FBgn0039577	0.550116	0.286364	0.813867	-2.62114	-0.530971	-3.52064	#N/A	#N/A	#N/A	#N/A	#N/A	#N/A
CG42753	FBgn0261807	0.549596	0.275791	0.823401	-0.570643	0.0312678	-3.28277	#N/A	#N/A	#N/A	#N/A	#N/A	#N/A
CG2371	FBgn0030323	0.549087	0.594491	0.503684	0.0809666	-0.105579	0.0513356	0.256831	0.278425	0.235237	#DIV/0!	#DIV/0!	#DIV/0!
CG31704	FBgn0051704	0.548199	0.906656	0.189742	0.265929	0.134037	0.245648	#N/A	#N/A	#N/A	#N/A	#N/A	#N/A
CG15661	FBgn0034605	0.548116	0.793775	0.302457	0.176468	0.134955	0.297366	0.805521	0.874748	0.736295	0.760566	0.811524	0.259515
CG13538	FBgn0034820	0.548037	0.191905	0.904169	-1.50288	-0.0290826	-2.89613	#N/A	#N/A	#N/A	#N/A	#N/A	#N/A
CG4096	FBgn0029791	0.547049	0.685978	0.408119	-0.140067	-0.224044	-0.0586485	#N/A	#N/A	#N/A	#N/A	#N/A	#N/A
CG6071	FBgn0036186	0.546995	-0.347085	1.44108	1.08961	1.14415	-0.483866	0.805668	0.413416	1.19792	0.636026	0.384114	0.407053
Obp19b	FBgn0031110	0.54668	0.416944	0.676415	-0.118481	0.0277506	0.00323689	0.892728	0.74565	1.03981	0.869664	0.679689	0.715287
Obp51a	FBgn0043530	0.546308	-0.323778	1.4164	-1.35266	0.7647	-2.27877	-0.153492	0.790664	-1.09765	-0.111246	-0.701572	2.03029
CR34285	FBgn0085314	0.545882	-0.163829	1.25559	-0.539862	1.5484	-0.631126	#N/A	#N/A	#N/A	#N/A	#N/A	#N/A
mir-375	FBgn0262177	0.545694	-0.228566	1.31995	-0.159212	0.141496	-0.508698	#N/A	#N/A	#N/A	#N/A	#N/A	#N/A
CG14407	FBgn0030584	0.545055	0.496601	0.593509	-0.0698565	0.0469411	0.0659251	0.0902164	0.232072	-0.0516393	-0.162792	-0.0604884	0.117692
CG14262	FBgn0039503	0.544934	0.335901	0.753966	-0.246916	-0.425956	-2.19683	#N/A	#N/A	#N/A	#N/A	#N/A	#N/A
CG8145	FBgn0037617	0.544924	0.577261	0.512587	0.141043	0.0641909	0.243546	#N/A	#N/A	#N/A	#N/A	#N/A	#N/A
Fie	FBgn0026592	0.542947	0.458868	0.627026	-0.11137	-0.0652942	-0.110545	#N/A	#N/A	#N/A	#N/A	#N/A	#N/A
CG17230	FBgn0046225	0.542404	0.345166	0.739643	0.0593588	-0.130588	-0.511241	#N/A	#N/A	#N/A	#N/A	#N/A	#N/A
CG7778	FBgn0032025	0.541284	0.738361	0.344206	-0.00913874	-0.0552241	0.00808054	#N/A	#N/A	#N/A	#N/A	#N/A	#N/A
CG4433	FBgn0038763	0.540478	0.552497	0.52846	-0.141652	-0.221809	-0.24195	0.347055	0.500049	0.194061	0.424784	0.00574808	-0.0701949
CG14759	FBgn0033278	0.540071	0.0944732	0.985669	-0.744021	0.266324	-3.16797	#N/A	#N/A	#N/A	#N/A	#N/A	#N/A
Gs1l	FBgn0019982	0.539602	0.478985	0.600219	-0.0534961	-0.064833	-0.0716309	0.209431	0.17297	0.245892	-0.0510956	-0.0373424	0.20826
dob	FBgn0030607	0.539389	0.67272	0.406057	-0.0728134	0.168152	0.231621	#N/A	#N/A	#N/A	#N/A	#N/A	#N/A
CG5107	FBgn0039342	0.538749	0.643073	0.434426	-0.646718	-0.0187039	0.0335755	1.94703	1.92099	1.97307	#DIV/0!	#DIV/0!	#DIV/0!
Mst36Fa	FBgn0086681	0.538127	0.461071	0.615182	-0.00611324	-0.0983098	-0.342794	#N/A	#N/A	#N/A	#N/A	#N/A	#N/A
CG1908	FBgn0030274	0.5376	0.584708	0.490492	0.0162963	-0.141366	-0.133944	#N/A	#N/A	#N/A	#N/A	#N/A	#N/A
CG9072	FBgn0030614	0.53636	0.253352	0.819368	-0.86811	-0.489382	-1.58778	#N/A	#N/A	#N/A	#N/A	#N/A	#N/A
CG31139	FBgn0051139	0.53586	0.270636	0.801084	-2.41981	-0.0279236	-3.83549	#N/A	#N/A	#N/A	#N/A	#N/A	#N/A
CG32727	FBgn0052727	0.535687	0.357812	0.713561	0.28345	-0.258026	-2.39946	#N/A	#N/A	#N/A	#N/A	#N/A	#N/A
CG42828	FBgn0262010	0.534954	0.347244	0.722663	-0.1963	0.204546	-0.737965	#N/A	#N/A	#N/A	#N/A	#N/A	#N/A
Ip259	FBgn0025366	0.533816	0.347848	0.719783	0.148286	0.0853266	0.0597104	-0.201068	-0.316758	-0.085378	#DIV/0!	#DIV/0!	#DIV/0!
Pex11	FBgn0034058	0.533544	0.708411	0.358677	-0.0496816	-0.055106	-0.00366656	1.39802	1.53284	1.2632	0.232947	-0.0500253	-0.340547
CG11298	FBgn0034721	0.53322	0.239994	0.826446	-0.395702	-0.0785909	-2.24717	#N/A	#N/A	#N/A	#N/A	#N/A	#N/A
CG43072	FBgn0262482	0.532624	0.313963	0.751285	-0.756885	-0.209861	-1.58088	#N/A	#N/A	#N/A	#N/A	#N/A	#N/A
CG14921	FBgn0032345	0.53129	0.475236	0.587344	0.196964	-0.433091	-0.448316	#N/A	#N/A	#N/A	#N/A	#N/A	#N/A
CG8368	FBgn0035707	0.530439	0.294934	0.765945	0.164185	0.0295791	-0.295769	#N/A	#N/A	#N/A	#N/A	#N/A	#N/A
CG8407	FBgn0033687	0.530201	0.282851	0.777552	-0.0279526	-0.480065	-0.931542	#N/A	#N/A	#N/A	#N/A	#N/A	#N/A
CG6662	FBgn0035907	0.530091	0.538977	0.521204	0.0824242	0.0195283	0.0749649	0.42828	0.436677	0.419883	0.0639411	0.212663	0.263137
CG6432	FBgn0039184	0.529958	1.17701	-0.117095	-0.0990816	-0.268578	0.0739188	-0.854923	-0.817647	-0.892199	#DIV/0!	#DIV/0!	#DIV/0!
Ahcy89E	FBgn0015011	0.529646	0.60367	0.455621	-0.0621969	0.0032737	0.0502123	0.252496	0.217693	0.287298	0.0404144	0.0814612	0.173378
CG31784	FBgn0051784	0.529491	0.228294	0.830689	-2.56598	0.170311	-4.01832	#N/A	#N/A	#N/A	#N/A	#N/A	#N/A
CG1636	FBgn0030030	0.529388	0.488516	0.570261	-0.121418	-0.113663	-0.143294	0.370398	0.467174	0.273622	#DIV/0!	#DIV/0!	#DIV/0!
ND23	FBgn0017567	0.528246	0.622466	0.434025	-0.0397986	0.0414708	0.100902	0.213825	0.29629	0.131361	-0.187691	-0.145114	0.0201185
CG31269	FBgn0051269	0.527135	0.372616	0.681654	-3.38491	0.206152	-0.120693	#N/A	#N/A	#N/A	#N/A	#N/A	#N/A
kuk	FBgn0038476	0.526971	0.568811	0.485132	-0.0205425	-0.107016	0.000170794	0.284765	0.252995	0.316534	0.0939513	0.0382894	-0.105324
CG43396	FBgn0263270	0.526464	0.0159554	1.03697	0.0877162	1.2471	-0.394028	#N/A	#N/A	#N/A	#N/A	#N/A	#N/A
Jheh1	FBgn0010053	0.525557	0.403297	0.647817	-0.111674	-0.00819177	0.0511255	0.701188	0.644714	0.757662	-0.0362031	0.101821	-0.0224927
CG12162	FBgn0037329	0.524998	0.400238	0.649758	-0.118619	-0.0317874	-0.0559165	0.111516	0.0804336	0.142599	-0.230289	-0.315613	-0.221973
toe	FBgn0036285	0.524807	0.139333	0.910281	0.136875	0.340106	-0.0619436	#N/A	#N/A	#N/A	#N/A	#N/A	#N/A
CG18155	FBgn0029945	0.523259	0.276473	0.770046	0.255894	-0.245361	-1.08699	#N/A	#N/A	#N/A	#N/A	#N/A	#N/A
CG34120	FBgn0083956	0.523009	0.585376	0.460643	-0.0190713	-0.0234209	-0.0217109	0.82683	0.736321	0.917338	0.475077	0.164802	-0.0694954
CG15908	FBgn0033085	0.522795	0.652423	0.393166	-0.069752	-0.0722814	0.00640058	-0.236388	-0.299334	-0.173442	-0.847694	-0.834307	-0.426964
Cda5	FBgn0051973	0.520757	0.485744	0.55577	-0.301455	-0.160698	-0.224685	0.700767	0.494411	0.907122	0.0680186	-0.738954	-0.92869
CG4666	FBgn0029838	0.520038	0.918911	0.121165	-0.133834	-0.136924	0.0139309	-0.0194784	-0.091557	0.0526002	-0.0321291	-0.00672774	-0.339081
Adgf-C	FBgn0038173	0.519821	0.758546	0.281095	-0.304577	-0.564968	-0.231635	#N/A	#N/A	#N/A	#N/A	#N/A	#N/A
CG14694	FBgn0037845	0.519712	0.700132	0.339293	-0.127324	-0.0245205	-0.037024	#N/A	#N/A	#N/A	#N/A	#N/A	#N/A
CG17738	FBgn0038009	0.519054	0.856187	0.181921	1.60303	0.827196	1.45023	#N/A	#N/A	#N/A	#N/A	#N/A	#N/A
RpS28-like	FBgn0085211	0.51863	0.360356	0.676904	-1.38467	-0.703329	-2.46026	#N/A	#N/A	#N/A	#N/A	#N/A	#N/A
CAH2	FBgn0027843	0.518621	0.685691	0.351551	-0.0355898	0.00482337	0.0151224	0.381702	0.551099	0.212305	0.3456	0.454005	0.171933
CG10553	FBgn0039324	0.518601	0.117931	0.919272	-0.325213	-0.0298041	-0.098216	-0.427465	-0.316292	-0.538639	-0.870894	-0.358768	0.125656
CG12729	FBgn0029816	0.518345	0.154346	0.882344	0.323495	0.0866482	-2.24412	#N/A	#N/A	#N/A	#N/A	#N/A	#N/A
Cpr67Fb	FBgn0036110	0.517723	0.912018	0.123429	0.362582	-0.061236	0.468216	0.074486	0.235447	-0.0864745	#DIV/0!	#DIV/0!	#DIV/0!
CS-2	FBgn0029091	0.517704	0.647792	0.387616	-0.502155	0.0011151	0.202264	#N/A	#N/A	#N/A	#N/A	#N/A	#N/A
dpr9	FBgn0038282	0.516862	0.364844	0.66888	-0.00200533	-0.0159604	-0.0479091	#N/A	#N/A	#N/A	#N/A	#N/A	#N/A
PpN58A	FBgn0025573	0.516307	0.255115	0.777499	-0.896226	-0.109688	-3.727	#N/A	#N/A	#N/A	#N/A	#N/A	#N/A
CG12203	FBgn0031021	0.516096	0.419907	0.612285	-0.157904	-0.0898689	-0.101451	0.129568	0.196153	0.0629827	-0.32142	-0.22381	-0.0281856
CG9581	FBgn0031093	0.515744	0.477958	0.55353	0.135592	0.069575	0.114505	0.553912	0.528449	0.579376	0.0231278	-0.102045	-0.142419
ACXD	FBgn0040507	0.51498	0.532119	0.497841	-0.424521	-0.279578	-0.317863	#N/A	#N/A	#N/A	#N/A	#N/A	#N/A
alpha-Est10	FBgn0015569	0.514364	0.652322	0.376406	-0.113941	-0.0901357	0.0034947	0.72127	0.729256	0.713284	0.0580591	-0.15011	-0.0739759
yps	FBgn0022959	0.512798	0.448336	0.57726	0.274549	0.12302	0.0765594	-0.0530953	-0.00392734	-0.102263	0.00705874	0.0936613	0.250077
CG30416	FBgn0050416	0.51266	0.171923	0.853397	-1.70024	-0.0554717	-3.62331	#N/A	#N/A	#N/A	#N/A	#N/A	#N/A
CG13220	FBgn0033608	0.512651	0.43521	0.590093	-0.157437	-0.0409274	-0.0682575	0.00964037	0.0721612	-0.0528805	-0.216259	-0.0055695	-0.274139
Adk3	FBgn0042094	0.512171	0.473999	0.550342	-0.164924	-0.0691733	-0.0920009	0.233098	0.097448	0.368748	-0.0546037	0.212875	0.358155
I-3	FBgn0261624	0.512018	0.308416	0.715621	-1.49325	-0.601887	-2.65066	#N/A	#N/A	#N/A	#N/A	#N/A	#N/A
CG5343	FBgn0032248	0.511101	0.355197	0.667005	-0.10364	-0.144894	-0.273719	#N/A	#N/A	#N/A	#N/A	#N/A	#N/A
Las	FBgn0029158	0.510694	0.500837	0.52055	-0.0480903	0.0120613	0.025563	-0.0939067	-0.0658791	-0.121934	-0.136346	-0.163314	-0.0417213
tRNA:CR32093	FBgn0052093	0.510338	0.397808	0.622868	0.374442	-0.389804	0.57367	#N/A	#N/A	#N/A	#N/A	#N/A	#N/A
CG4329	FBgn0034745	0.510325	0.150193	0.870457	0.102244	0.0119159	-1.77522	#N/A	#N/A	#N/A	#N/A	#N/A	#N/A
CG5646	FBgn0039525	0.510193	0.500914	0.519471	-0.109687	0.0115487	-0.0749249	0.339137	0.381103	0.297171	0.150199	0.0165143	-0.300936
CG1265	FBgn0035517	0.510101	0.457708	0.562495	-0.248679	-0.225599	-0.20148	#N/A	#N/A	#N/A	#N/A	#N/A	#N/A
CheB42c	FBgn0066292	0.509798	0.656274	0.363321	-0.315898	-0.0851664	-0.105385	0.335476	0.408062	0.262891	#DIV/0!	#DIV/0!	#DIV/0!
Rpt3R	FBgn0037742	0.509083	0.169939	0.848227	1.42816	0.15194	-0.59326	-0.0569227	-0.0643454	-0.0495	#DIV/0!	#DIV/0!	#DIV/0!
CG11752	FBgn0030292	0.508575	0.444646	0.572503	-0.267211	-0.147874	-0.111972	0.191658	0.213238	0.170079	-0.379678	-0.250089	-0.217497
Tsf1	FBgn0022355	0.506926	0.697657	0.316194	0.112651	0.0418797	0.0866941	0.472604	0.519097	0.426111	0.439723	0.1576	0.568967
CG5322	FBgn0032253	0.506673	-0.103725	1.11707	-0.132578	0.0544291	0.0172654	-0.0894917	-0.0555727	-0.123411	#DIV/0!	#DIV/0!	#DIV/0!
Mgstl	FBgn0025814	0.505445	0.410969	0.599921	-0.075432	-0.0160434	0.0370552	0.631878	0.419647	0.844109	0.0321034	-0.112359	-0.299648
CG17637	FBgn0037004	0.505195	0.0173208	0.993069	0.530467	0.0709581	-0.953032	#N/A	#N/A	#N/A	#N/A	#N/A	#N/A
Men-b	FBgn0029155	0.504426	0.436075	0.572777	-0.406079	-0.115514	-0.138412	-0.079876	-0.0592212	-0.100531	-0.108042	-0.0664533	0.0140566
Obp56a	FBgn0034468	0.503992	1.14144	-0.133457	0.261915	0.121629	0.130337	-0.136302	0.534026	-0.80663	0.69286	0.369432	0.533776
DJ-1alpha	FBgn0033885	0.502708	0.398834	0.606582	0.455855	0.197799	0.318908	#N/A	#N/A	#N/A	#N/A	#N/A	#N/A
Got2	FBgn0001125	0.502431	0.387386	0.617477	-0.0484726	-0.000567585	0.0530746	-0.634815	-0.768593	-0.501036	-0.0397134	0.147375	0.240004
CG32488	FBgn0052488	0.501455	0.277978	0.724932	-1.89267	-0.255162	-3.0233	#N/A	#N/A	#N/A	#N/A	#N/A	#N/A
l(3)03670	FBgn0010808	0.501404	0.438674	0.564134	-0.135441	-0.119332	-0.149808	0.0134498	0.0291101	-0.0022106	-0.269992	-0.104421	-0.12892
CR43845	FBgn0264427	0.500513	0.0877023	0.913324	-0.83393	-0.261691	-1.53928	#N/A	#N/A	#N/A	#N/A	#N/A	#N/A
CG12963	FBgn0034031	0.500374	0.451908	0.54884	-0.557018	0.0465094	0.0115599	#N/A	#N/A	#N/A	#N/A	#N/A	#N/A
CG1746	FBgn0039830	0.499591	0.271756	0.727426	-0.227825	-0.171442	-0.2351	#DIV/0!	#DIV/0!	#DIV/0!	#DIV/0!	#DIV/0!	#DIV/0!
CG34232	FBgn0085261	0.499444	0.662072	0.336816	-0.117738	0.0228189	0.12131	#N/A	#N/A	#N/A	#N/A	#N/A	#N/A
CG12001	FBgn0037265	0.499399	0.455694	0.543104	0.219125	0.0184121	-0.00630457	-0.0887332	-0.0807774	-0.0966889	0.245848	0.248811	0.22721
cbt	FBgn0043364	0.499211	0.443019	0.555403	-0.0789236	-0.117873	-0.214733	#N/A	#N/A	#N/A	#N/A	#N/A	#N/A
CG15765	FBgn0029814	0.498948	0.373644	0.624252	-0.206806	-0.14096	-0.214516	#N/A	#N/A	#N/A	#N/A	#N/A	#N/A
CG34274	FBgn0085303	0.497641	0.347644	0.647639	-2.14722	-0.711839	-2.64973	#N/A	#N/A	#N/A	#N/A	#N/A	#N/A
CG3499	FBgn0034792	0.497404	0.45354	0.541269	0.026141	0.00798335	-0.0402225	0.177654	0.160252	0.195056	-0.337192	-0.342312	-0.509427
CG14125	FBgn0036232	0.494343	1.26809	-0.279403	0.0871708	-0.00305035	0.185615	#N/A	#N/A	#N/A	#N/A	#N/A	#N/A
CG42446	FBgn0259917	0.494067	0.261577	0.726556	-2.14408	-0.449209	-3.09631	#N/A	#N/A	#N/A	#N/A	#N/A	#N/A
CG32732	FBgn0052732	0.494035	0.602041	0.386029	0.130095	-0.130135	-0.0732909	0.348569	0.308535	0.388604	0.465541	0.104152	0.201204
Atg1	FBgn0260945	0.493751	-0.195555	1.18306	0.023608	0.0396305	0.000718128	-0.0245948	-0.0856354	0.0364459	#DIV/0!	#DIV/0!	#DIV/0!
CG2100	FBgn0037369	0.493316	0.464109	0.522523	0.270274	0.119837	0.130273	0.332028	0.328669	0.335387	0.15226	0.14613	0.314236
CG13284	FBgn0032614	0.492927	0.847	0.138854	-0.136445	-0.0972166	0.0582619	0.204179	0.240879	0.167478	-0.0263869	0.231741	-0.134678
PebII	FBgn0011694	0.492809	0.0629807	0.922638	0.208111	1.14393	-2.86009	#DIV/0!	#DIV/0!	#DIV/0!	#DIV/0!	#DIV/0!	#DIV/0!
CG42467	FBgn0259957	0.491823	-0.423711	1.40736	0.721244	1.28354	-1.19843	#N/A	#N/A	#N/A	#N/A	#N/A	#N/A
levy	FBgn0034877	0.491692	0.4633	0.520085	-0.203236	-0.117427	-0.10779	0.258686	0.293417	0.223955	-0.287012	0.123505	0.0477733
mfas	FBgn0260745	0.490139	0.392557	0.587721	0.0533751	0.0541243	-0.0120129	-0.199404	-0.290144	-0.108664	1.14796	0.615369	0.421274
CG9030	FBgn0030599	0.488858	0.274668	0.703048	-0.353279	-0.617109	-2.28277	#N/A	#N/A	#N/A	#N/A	#N/A	#N/A
CG8021	FBgn0037602	0.488758	0.54136	0.436157	0.0144164	-0.0721874	0.0708156	#N/A	#N/A	#N/A	#N/A	#N/A	#N/A
antdh	FBgn0026268	0.488112	0.251076	0.725148	-0.226885	-0.00302192	-0.0494814	0.29586	-0.173754	0.765473	0.521976	0.222283	0.584763
CG6999	FBgn0030085	0.487917	0.429296	0.546539	-0.00743556	0.0156967	0.0413417	#N/A	#N/A	#N/A	#N/A	#N/A	#N/A
Nop17l	FBgn0033224	0.487016	0.480419	0.493613	0.0943875	0.0088626	0.0464577	0.408625	0.426957	0.390293	#DIV/0!	#DIV/0!	#DIV/0!
CG12896	FBgn0033521	0.486969	0.512943	0.460994	0.0825472	0.0447988	0.10747	-0.0248696	-0.0626918	0.0129526	0.405336	-0.0606575	0.446141
CG13494	FBgn0034671	0.486818	0.285151	0.688485	-1.08875	-0.129031	-2.51218	#N/A	#N/A	#N/A	#N/A	#N/A	#N/A
Mal-A1	FBgn0002570	0.486516	0.612348	0.360683	-0.117154	0.0711896	0.0864739	1.07611	0.953814	1.19841	-0.911454	0.767074	0.284279
Mdh2	FBgn0262559	0.485471	0.239692	0.73125	-0.238866	-0.125611	-0.213313	0.0526719	0.058143	0.0472007	-0.0854166	-0.0563639	0.07108
CG7712	FBgn0033570	0.485102	0.499283	0.470921	-0.134107	-0.0500042	-0.0133107	0.126545	0.205314	0.0477764	-0.303699	-0.107018	0.00635567
CG6404	FBgn0027615	0.485032	0.354694	0.615371	-0.202304	-0.193411	-0.363545	0.189583	0.200659	0.178507	-0.560655	-0.734971	-0.88668
CG14528	FBgn0039611	0.484675	0.328429	0.640921	0.0346683	0.0389941	0.0942629	0.419777	0.513187	0.326366	0.47546	0.194675	0.182239
Hsp27	FBgn0001226	0.484403	0.387887	0.580919	0.69229	0.139744	-0.284806	0.47021	0.752872	0.187548	#DIV/0!	#DIV/0!	#DIV/0!
CG11699	FBgn0030311	0.483215	0.496964	0.469466	-0.246343	-0.108341	-0.130928	-0.208702	-0.175941	-0.241464	#DIV/0!	0.0231533	0.0795973
CG30499	FBgn0050499	0.483047	0.571506	0.394588	-0.00409027	-0.0554397	0.034698	0.447021	0.367732	0.52631	#DIV/0!	#DIV/0!	#DIV/0!
CG11529	FBgn0036264	0.48276	0.758359	0.207162	0.077809	0.0394844	0.270299	#N/A	#N/A	#N/A	#N/A	#N/A	#N/A
CG5071	FBgn0039347	0.481796	0.337251	0.626342	-0.110657	-0.443848	-0.64651	#N/A	#N/A	#N/A	#N/A	#N/A	#N/A
CG4908	FBgn0032195	0.481368	0.46257	0.500165	-0.0986923	-0.202064	0.0766538	0.0836774	-0.007608	0.174963	-0.136943	-0.205681	-0.157639
Roe1	FBgn0014877	0.480768	0.403336	0.5582	-0.0250597	-0.031001	-0.0386343	0.0798101	0.111874	0.0477465	-0.480243	-0.210427	-0.0940773
CG9400	FBgn0030562	0.480085	0.59483	0.365341	-0.279475	-0.252801	-0.298558	#N/A	#N/A	#N/A	#N/A	#N/A	#N/A
CG7214	FBgn0031940	0.478801	1.01298	-0.0553757	-1.59101	-1.169	-1.03115	0.482025	0.404184	0.559867	0.491185	0.741429	0.420362
CG9172	FBgn0030718	0.47772	0.445275	0.510164	-0.0276152	0.0355545	0.0350376	0.191257	0.227144	0.155369	-0.343526	-0.123505	-0.132055
snoRNA:Or-aca4	FBgn0082922	0.476488	0.381189	0.571788	0.42346	-0.0483303	-1.03539	#N/A	#N/A	#N/A	#N/A	#N/A	#N/A
CG13872	FBgn0034477	0.476484	0.170876	0.782092	-1.01397	0.152269	-2.91075	#N/A	#N/A	#N/A	#N/A	#N/A	#N/A
capu	FBgn0000256	0.47518	0.442395	0.507966	-0.218979	-0.0754557	-0.147404	#N/A	#N/A	#N/A	#N/A	#N/A	#N/A
CG15625	FBgn0031644	0.474909	0.206035	0.743784	0.22032	-0.0498351	-1.61865	#N/A	#N/A	#N/A	#N/A	#N/A	#N/A
CG14356	FBgn0038207	0.474384	1.33957	-0.390798	0.502315	-0.279454	1.02861	#N/A	#N/A	#N/A	#N/A	#N/A	#N/A
CoVIII	FBgn0263911	0.474157	0.451408	0.496906	-0.219911	-0.140696	-0.11557	#N/A	#N/A	#N/A	#N/A	#N/A	#N/A
CG5823	FBgn0038515	0.473935	0.627941	0.319928	-0.043619	-0.0631851	-0.0704899	#N/A	#N/A	#N/A	#N/A	#N/A	#N/A
l(1)G0334	FBgn0028325	0.473736	0.315355	0.632117	-0.151514	-0.0993464	-0.159371	0.134606	0.140657	0.128555	-0.0757228	-0.0344056	0.0638902
CG9782	FBgn0030763	0.47356	0.619276	0.327844	0.0257992	-0.0769723	0.0354479	#N/A	#N/A	#N/A	#N/A	#N/A	#N/A
Aats-phe	FBgn0020766	0.472928	0.32736	0.618496	0.0324578	0.0891623	0.0912075	#N/A	#N/A	#N/A	#N/A	#N/A	#N/A
RFeSP	FBgn0021906	0.472808	0.437064	0.508552	-0.121867	-0.0419981	-0.0273673	0.1325	0.216268	0.048733	0.108287	0.172364	0.191444
Cyp6a21	FBgn0033981	0.472574	0.387422	0.557727	-0.420036	-0.135726	-0.0822735	0.662954	0.467529	0.85838	-0.0270388	-0.582746	-0.731465
l(3)neo18	FBgn0011455	0.472537	0.420483	0.524591	-0.0892026	-0.0486258	-0.031994	-0.0247132	-0.0590178	0.00959146	-0.190375	-0.100105	-0.0702392
CG11052	FBgn0040524	0.472418	0.435864	0.508972	-0.418844	-0.314079	-0.306324	#N/A	#N/A	#N/A	#N/A	#N/A	#N/A
olf186-F	FBgn0041585	0.472377	0.513502	0.431251	-0.109259	-0.150469	-0.115087	#N/A	#N/A	#N/A	#N/A	#N/A	#N/A
FucTB	FBgn0032117	0.472003	0.353849	0.590158	0.0495299	-0.135996	-0.336183	-0.0561933	-0.107612	-0.00477434	#DIV/0!	#DIV/0!	#DIV/0!
CG14806	FBgn0029594	0.47183	0.465579	0.478081	-0.149412	-0.146717	-0.0694806	0.678138	0.6716	0.684677	#DIV/0!	#DIV/0!	#DIV/0!
CG4161	FBgn0028892	0.471766	-0.00291055	0.946443	-3.71519	0.00954526	-3.42966	#N/A	#N/A	#N/A	#N/A	#N/A	#N/A
CG6746	FBgn0032394	0.471055	0.772774	0.169337	-0.0523262	-0.0800798	0.0415413	0.217725	0.269864	0.165587	0.0752789	-0.0339344	-0.140663
CG8008	FBgn0033387	0.47098	0.611116	0.330844	0.125776	0.0838162	0.135996	#N/A	#N/A	#N/A	#N/A	#N/A	#N/A
CG17839	FBgn0036454	0.470861	0.520003	0.421719	-0.127949	-0.0479372	-0.0485124	0.671695	0.648129	0.695261	0.419626	0.269812	0.0319785
CG6664	FBgn0036685	0.468992	0.314599	0.623386	-0.175647	-0.324249	-0.408383	0.224448	0.186148	0.262748	-0.804475	-0.804017	-0.715843
Jon99Ci	FBgn0003358	0.46818	0.888953	0.047407	-1.67665	-0.0676112	0.111839	#N/A	#N/A	#N/A	#N/A	#N/A	#N/A
yin	FBgn0015565	0.467987	0.62446	0.311515	0.114469	0.0705375	0.121205	#N/A	#N/A	#N/A	#N/A	#N/A	#N/A
CG12780	FBgn0033301	0.467861	0.787968	0.147754	-0.150927	0.127322	0.167836	#N/A	#N/A	#N/A	#N/A	#N/A	#N/A
CG5377	FBgn0038974	0.467756	0.407035	0.528477	0.075917	0.109401	0.146489	0.181346	0.275825	0.0868674	0.266802	0.326064	0.431569
betaTry	FBgn0010357	0.467219	0.854917	0.0795215	-0.207389	-0.0145133	-0.0440037	0.804471	1.2245	0.384439	#DIV/0!	#DIV/0!	#DIV/0!
CG8560	FBgn0035781	0.467069	0.10917	0.824969	-1.17758	-0.0770075	-0.209451	#N/A	#N/A	#N/A	#N/A	#N/A	#N/A
CG15482	FBgn0032483	0.467024	0.272864	0.661183	0.733968	-0.424816	-2.20451	#N/A	#N/A	#N/A	#N/A	#N/A	#N/A
CG12766	FBgn0035476	0.466786	0.644265	0.289307	-0.420645	0.0712318	0.201895	0.288457	0.208086	0.368827	-0.355768	0.3183	0.380321
Acyp2	FBgn0038363	0.466682	0.436604	0.496759	0.0433474	-0.0907829	-0.0694086	-0.00244689	-0.0350444	0.0301506	-0.104138	0.140766	0.150132
PyK	FBgn0003178	0.465765	0.330411	0.601119	-0.221069	-0.147651	-0.18241	#N/A	#N/A	#N/A	#N/A	#N/A	#N/A
CG33346	FBgn0053346	0.465497	1.37312	-0.442129	-0.0973005	0.00428535	0.249754	-0.945001	-0.859393	-1.03061	-0.14394	0.702691	-0.172278
CG10513	FBgn0039311	0.465402	0.371445	0.55936	-0.511173	-0.0751954	-0.194684	0.711552	0.74643	0.676673	-0.407351	-0.0555882	0.330286
Vha68-1	FBgn0020368	0.465184	0.427799	0.502568	-0.0854448	-0.122894	-0.164419	#N/A	#N/A	#N/A	#N/A	#N/A	#N/A
CG3270	FBgn0033093	0.464969	0.486887	0.44305	-0.355494	0.0593914	-0.017593	0.299283	0.294971	0.303595	-0.269079	0.291182	0.50004
CG6429	FBgn0046999	0.464896	0.50214	0.427653	0.0740632	-0.0216466	0.010764	0.287622	0.45541	0.119833	#DIV/0!	#DIV/0!	#DIV/0!
CG3348	FBgn0040609	0.464702	0.0425143	0.886889	-0.115126	-0.270252	-0.379349	#N/A	#N/A	#N/A	#N/A	#N/A	#N/A
CG31091	FBgn0051091	0.464305	0.968411	-0.0398017	-2.1858	0.507669	1.28026	#N/A	#N/A	#N/A	#N/A	#N/A	#N/A
CG43101	FBgn0262547	0.464114	-0.437469	1.3657	-1.49145	0.94385	-2.63834	#N/A	#N/A	#N/A	#N/A	#N/A	#N/A
SPE	FBgn0039102	0.463011	0.484762	0.44126	0.0285102	-0.0166501	0.0207538	0.0409048	-0.0627713	0.144581	0.666481	0.344118	0.472919
Mal-A4	FBgn0033294	0.462932	0.305039	0.620825	-0.190512	0.220049	0.0994959	0.369966	0.308573	0.431359	#DIV/0!	#DIV/0!	#DIV/0!
Sfp87B	FBgn0259975	0.462747	0.0779419	0.847551	0.805732	0.374019	-2.34166	-0.37666	-0.590259	-0.16306	0.405323	0.81934	1.44074
l(2)35Di	FBgn0001989	0.462492	0.457404	0.467581	-0.242298	-0.171515	-0.134856	0.0739712	0.145307	0.00263559	-0.194468	-0.126112	-0.108464
Adh	FBgn0000055	0.462455	0.591914	0.332996	-0.542326	-0.277416	-0.0318232	0.943977	1.02422	0.863734	-0.0755169	0.162294	0.279378
mre11	FBgn0020270	0.462393	1.27607	-0.351285	0.29442	0.0506573	0.511272	#N/A	#N/A	#N/A	#N/A	#N/A	#N/A
SdhC	FBgn0037873	0.462325	0.428803	0.495848	-0.173118	-0.0556508	-0.0420161	0.276578	0.269747	0.283409	-0.32463	-0.137819	-0.385192
CG18128	FBgn0034898	0.462022	0.27453	0.649514	0.885349	0.345784	-1.37045	#N/A	#N/A	#N/A	#N/A	#N/A	#N/A
mRpL54	FBgn0034579	0.461587	0.48937	0.433805	0.0370747	0.10708	0.191182	#N/A	#N/A	#N/A	#N/A	#N/A	#N/A
CG42521	FBgn0260396	0.461311	-0.452067	1.37469	-0.348507	2.03163	0.109085	#N/A	#N/A	#N/A	#N/A	#N/A	#N/A
CG17387	FBgn0037276	0.46114	0.155317	0.766962	0.540286	-0.159292	-0.9949	#N/A	#N/A	#N/A	#N/A	#N/A	#N/A
CG2034	FBgn0015359	0.460852	0.594382	0.327321	-0.0285684	-0.155578	-0.134028	0.0517913	0.0191496	0.084433	-0.0167314	0.0398777	0.0207206
CG43061	FBgn0262363	0.460585	0.0600839	0.861086	0.192908	-0.0581198	-1.88603	#N/A	#N/A	#N/A	#N/A	#N/A	#N/A
CG34459	FBgn0085488	0.460408	0.318004	0.602812	0.0994372	-0.278382	-0.341414	#N/A	#N/A	#N/A	#N/A	#N/A	#N/A
CG11722	FBgn0037777	0.459768	0.395327	0.524209	-0.276214	-0.267414	-0.270192	0.395896	0.331648	0.460145	-0.431555	-0.16707	0.00235101
CG4169	FBgn0250814	0.459562	0.40018	0.518944	-0.206722	-0.0607904	-0.0823325	0.15815	0.154958	0.161341	-0.0480202	0.0161506	0.0943495
CG15412	FBgn0031528	0.459292	0.442888	0.475696	-0.347512	-0.316081	-0.391287	-0.0228743	0.0925327	-0.138281	#DIV/0!	#DIV/0!	#DIV/0!
bwa	FBgn0045064	0.459152	0.337898	0.580407	-0.0410816	-0.20703	-0.164215	#N/A	#N/A	#N/A	#N/A	#N/A	#N/A
CG2656	FBgn0037478	0.459117	0.469648	0.448585	0.762335	0.487856	0.377206	-0.31947	-0.409351	-0.229589	#DIV/0!	#DIV/0!	#DIV/0!
l(1)G0148	FBgn0028360	0.45905	0.370303	0.547797	0.0842562	-0.106994	-0.282926	#N/A	#N/A	#N/A	#N/A	#N/A	#N/A
CG31126	FBgn0051126	0.457953	0.429043	0.486863	-0.0988092	-0.0965517	-0.0319272	0.00233915	0.013681	-0.00900273	-0.370048	-0.079346	-0.113301
alphaTry	FBgn0003863	0.457468	0.761233	0.153702	-0.192027	-0.00469709	-0.00613434	0.475136	0.726169	0.224104	-0.211055	0.398267	0.116202
CG7371	FBgn0031710	0.456232	0.538929	0.373534	0.182223	0.0391381	0.0770801	0.107566	0.0953027	0.119829	#DIV/0!	#DIV/0!	#DIV/0!
CG31798	FBgn0051798	0.455834	0.215408	0.69626	-0.12042	-0.0383203	-0.841582	#N/A	#N/A	#N/A	#N/A	#N/A	#N/A
Mal-A8	FBgn0033297	0.455663	0.608684	0.302642	-0.323762	0.0250138	0.0409864	0.692058	0.695395	0.688721	-0.606814	0.503714	0.489028
CG30495	FBgn0050495	0.455484	0.619943	0.291025	-0.0941342	-0.233249	0.0546956	#N/A	#N/A	#N/A	#N/A	#N/A	#N/A
CG5703	FBgn0030853	0.455245	0.433039	0.47745	-0.0122271	0.0248388	0.0517158	0.141247	0.201121	0.0813719	-0.247131	-0.0866684	0.0220065
CoVIb	FBgn0031066	0.455243	0.396188	0.514298	-0.199587	-0.18167	-0.220089	0.360633	0.472379	0.248887	-0.177478	0.0356904	0.180722
CG10581	FBgn0037046	0.455221	0.637589	0.272852	0.133258	0.0506903	0.203339	0.278494	0.289239	0.26775	#DIV/0!	#DIV/0!	#DIV/0!
CG6206	FBgn0027611	0.45448	0.0880579	0.820901	-0.0580993	0.0587771	0.0782549	0.355639	0.237163	0.474115	0.217909	0.150437	0.291099
Tim17a2	FBgn0037307	0.454322	0.1517	0.756944	0.0266727	0.275985	-0.315539	#N/A	#N/A	#N/A	#N/A	#N/A	#N/A
Cyp4d8	FBgn0015033	0.454225	0.514996	0.393454	-0.0559731	0.0129009	0.0217322	#N/A	#N/A	#N/A	#N/A	#N/A	#N/A
Npc2h	FBgn0039801	0.453942	0.461443	0.446442	-0.387417	-0.0299735	-0.0880758	0.114009	0.315113	-0.0870957	0.0185969	0.0163049	0.404171
CG8292	FBgn0032004	0.453858	0.0941618	0.813554	-0.0492792	-0.105208	-1.0116	#N/A	#N/A	#N/A	#N/A	#N/A	#N/A
CG4686	FBgn0038739	0.453496	0.38577	0.521222	0.0327456	-0.0626326	-0.153132	0.219885	0.252851	0.186919	0.305191	0.0730125	-0.330849
ATPsyn-gamma	FBgn0020235	0.453131	0.216705	0.689557	-0.282246	-0.188859	-0.266316	0.161634	0.199234	0.124034	-0.20545	-0.136742	-0.044918
mRpS10	FBgn0038307	0.452965	0.503532	0.402397	-0.0625038	-0.0720115	-0.015193	0.389639	0.312846	0.466433	-0.697934	#DIV/0!	#DIV/0!
ATPsyn-beta	FBgn0010217	0.452777	0.097529	0.808024	-0.225191	-0.109541	-0.189106	0.128885	0.149968	0.107802	0.00389569	-0.0505277	0.0451579
mir-990	FBgn0262307	0.452423	0.477641	0.427206	-0.238046	-0.158392	-0.334471	#N/A	#N/A	#N/A	#N/A	#N/A	#N/A
CG30415	FBgn0250838	0.45159	0.450442	0.452738	-0.162858	-0.0912573	-0.0759718	0.229002	0.255007	0.202997	-0.116976	-0.169309	-0.150132
CG43362	FBgn0263094	0.451575	-0.161485	1.06464	-0.172398	0.7033	-0.823625	#N/A	#N/A	#N/A	#N/A	#N/A	#N/A
CG33285	FBgn0053285	0.451124	0.100597	0.80165	-0.173269	-0.0784652	-2.66775	#N/A	#N/A	#N/A	#N/A	#N/A	#N/A
CG31800	FBgn0051800	0.451047	0.45632	0.445774	-0.0285731	-0.0822553	-0.0814248	0.806325	1.07529	0.537362	#DIV/0!	#DIV/0!	#DIV/0!
CG13611	FBgn0039177	0.450813	0.250327	0.651298	0.079663	-0.48441	-1.33259	#N/A	#N/A	#N/A	#N/A	#N/A	#N/A
Mdr65	FBgn0004513	0.450167	0.491316	0.409018	-0.0187884	-0.105295	0.0471377	0.407285	0.304841	0.509729	-0.0782424	-0.117543	-0.627573
CG3321	FBgn0038224	0.449912	0.366507	0.533317	-0.13789	-0.102506	-0.0899784	0.159136	0.191191	0.12708	-0.0526362	-0.0591323	0.0286008
Cchl	FBgn0038925	0.449513	0.384262	0.514763	-0.177355	-0.0898314	-0.130961	-0.176551	-0.0786719	-0.274429	-0.235628	-0.1861	-0.0236868
CG13907	FBgn0035173	0.449181	0.514501	0.38386	-0.150847	-0.156687	-0.193691	0.092621	0.142252	0.0429901	0.0423438	0.144432	-0.0208982
TFAM	FBgn0038805	0.449022	0.444154	0.45389	-0.20759	-0.086885	-0.127505	0.0660988	0.0689559	0.0632417	-0.293768	0.0981207	0.126159
sut1	FBgn0028563	0.449006	0.720017	0.177995	-0.0703339	-0.15592	0.0528213	#N/A	#N/A	#N/A	#N/A	#N/A	#N/A
CG13155	FBgn0033723	0.448717	1.26742	-0.369981	-0.430406	-1.18629	0.321621	-0.599988	-0.667207	-0.532769	#DIV/0!	#DIV/0!	#DIV/0!
CR33319	FBgn0053319	0.448632	0.217126	0.680137	-1.34115	-0.216804	-1.81771	#N/A	#N/A	#N/A	#N/A	#N/A	#N/A
CG3566	FBgn0029854	0.448624	0.436079	0.46117	-0.00982582	-0.0210486	0.0669821	#DIV/0!	#DIV/0!	#DIV/0!	#DIV/0!	#DIV/0!	#DIV/0!
CG31528	FBgn0051528	0.448411	0.144018	0.752805	-0.120491	-0.236037	-0.76037	#N/A	#N/A	#N/A	#N/A	#N/A	#N/A
mRpL9	FBgn0038319	0.446672	0.488363	0.404981	-0.121982	-0.0823532	-0.0844113	1.06586	0.669338	1.46239	-0.0805316	-0.361653	-0.738359
CG9335	FBgn0032895	0.446421	0.476927	0.415916	-0.0970836	-0.118123	-0.0995552	#N/A	#N/A	#N/A	#N/A	#N/A	#N/A
CG12391	FBgn0033581	0.445661	0.50126	0.390062	-0.0384191	-0.00661017	0.0129875	0.345538	0.283031	0.408046	-0.292936	-0.041022	-0.0409007
janA	FBgn0001280	0.444745	0.372184	0.517306	0.241548	0.151185	0.212531	1.67358	1.27118	2.07599	0.0284033	1.73097	0.981422
mRpL14	FBgn0040389	0.444227	0.449107	0.439348	0.0506662	-0.00758375	0.0543636	1.20066	0.804097	1.59722	#DIV/0!	#DIV/0!	#DIV/0!
mfrn	FBgn0039561	0.444152	0.471726	0.416578	-0.0526632	-0.0799929	-0.102442	0.134228	0.18172	0.0867346	-0.0791905	0.0221729	-0.211161
CG10063	FBgn0035727	0.444039	0.0728661	0.815212	-0.271089	-0.594365	-1.65092	0.762337	0.91514	0.609534	#DIV/0!	#DIV/0!	#DIV/0!
CG14757	FBgn0033274	0.44368	0.58821	0.29915	-0.188526	0.0325811	0.0569281	-0.300822	-0.580548	-0.0210953	0.353396	0.0914397	0.220512
CG15196	FBgn0030296	0.443094	0.18067	0.705518	-0.984891	-0.045254	-2.64711	#N/A	#N/A	#N/A	#N/A	#N/A	#N/A
mRpL23	FBgn0035335	0.443044	0.35535	0.530737	-0.284279	-0.119595	-0.0392408	1.00499	0.751084	1.2589	#DIV/0!	#DIV/0!	#DIV/0!
CG5886	FBgn0039379	0.442432	0.215737	0.669127	0.342439	0.0335022	-0.195548	0.13584	0.135018	0.136662	-0.0151444	0.0459825	0.0415281
CG8993	FBgn0035334	0.442014	0.471909	0.412118	-0.140834	-0.078079	-0.0190956	0.190506	0.274358	0.106653	-0.148963	-0.0601433	0.0555998
CG15772	FBgn0029799	0.441812	0.399838	0.483787	-0.294653	-0.228026	-0.0759365	#N/A	#N/A	#N/A	#N/A	#N/A	#N/A
mRpS18A	FBgn0051450	0.441168	0.393218	0.489118	-0.221689	-0.126023	-0.0847089	0.854446	0.622959	1.08593	#DIV/0!	#DIV/0!	#DIV/0!
CG10877	FBgn0038804	0.440981	0.361701	0.520261	-0.264456	0.0915782	0.11767	-0.144286	-0.230453	-0.0581202	-0.691331	0.153424	0.367286
CG31077	FBgn0051077	0.440686	1.22092	-0.339549	-0.00692749	0.0241091	0.389267	#N/A	#N/A	#N/A	#N/A	#N/A	#N/A
CG14103	FBgn0036908	0.440471	0.501536	0.379406	0.244262	0.0414586	0.116741	0.33204	0.337695	0.326384	-0.0168657	-0.311429	-0.281634
CG42781	FBgn0261849	0.439929	0.342975	0.536884	-0.207175	-0.776598	-1.43149	#N/A	#N/A	#N/A	#N/A	#N/A	#N/A
Arr2	FBgn0000121	0.438925	-0.0676814	0.945531	0.204134	0.12744	0.142913	-0.00841622	-0.0219662	0.00513372	-0.385105	0.862352	0.763104
CG43120	FBgn0262580	0.438719	0.580464	0.296974	-0.128457	0.352343	0.334463	#N/A	#N/A	#N/A	#N/A	#N/A	#N/A
CG12375	FBgn0031987	0.438674	0.651525	0.225824	0.0631823	0.0921342	0.196874	0.28338	0.405539	0.161221	0.0337624	0.246473	0.386744
wash	FBgn0033692	0.438335	0.360969	0.5157	0.10034	-0.021266	-0.141335	#N/A	#N/A	#N/A	#N/A	#N/A	#N/A
CG13313	FBgn0035941	0.43816	0.857343	0.0189757	-0.272281	0.0707781	0.39621	#N/A	#N/A	#N/A	#N/A	#N/A	#N/A
CG13893	FBgn0035146	0.438083	0.50057	0.375595	-0.144218	-0.0817616	-0.0181205	0.278149	0.339896	0.216402	#DIV/0!	#DIV/0!	#DIV/0!
CG32278	FBgn0052278	0.437969	0.426073	0.449866	0.066544	0.100098	0.145634	#N/A	#N/A	#N/A	#N/A	#N/A	#N/A
CG31627	FBgn0051627	0.436844	0.091278	0.78241	-0.158292	0.0535192	-0.429112	#N/A	#N/A	#N/A	#N/A	#N/A	#N/A
CG4880	FBgn0030803	0.436491	0.49804	0.374942	0.161018	0.0443629	0.292225	#N/A	#N/A	#N/A	#N/A	#N/A	#N/A
CG1444	FBgn0029975	0.435855	0.692871	0.178839	-0.0125752	-0.106206	-0.0222823	-0.144862	-0.137786	-0.151938	-0.376453	0.0102267	-0.16231
CG17364	FBgn0036391	0.435183	0.76973	0.100636	-0.0313587	-0.112625	0.0289317	#N/A	#N/A	#N/A	#N/A	#N/A	#N/A
SdhA	FBgn0261439	0.43458	0.346955	0.522205	-0.287899	-0.13972	-0.155763	0.177641	0.16032	0.194962	-0.173973	-0.000877457	0.0808214
CG8245	FBgn0033031	0.434211	0.351305	0.517116	-0.253016	-0.231647	-0.261427	0.0978912	0.0416995	0.154083	#DIV/0!	#DIV/0!	#DIV/0!
CG33459	FBgn0053459	0.433688	0.170888	0.696488	-0.381604	0.585215	0.810872	#N/A	#N/A	#N/A	#N/A	#N/A	#N/A
CG30373	FBgn0050373	0.432992	0.419084	0.4469	-0.120842	0.0305988	0.06241	1.08414	1.18617	0.982104	-0.0926642	-0.699775	-0.162796
CG42782	FBgn0261853	0.432486	-0.362052	1.22702	-0.523283	0.608737	-1.29662	#N/A	#N/A	#N/A	#N/A	#N/A	#N/A
CG10936	FBgn0034253	0.432223	0.716027	0.148418	-0.731401	-0.293122	0.0858592	#N/A	#N/A	#N/A	#N/A	#N/A	#N/A
CG32686	FBgn0052686	0.431875	0.169279	0.694472	-0.314814	0.202699	-0.576141	#N/A	#N/A	#N/A	#N/A	#N/A	#N/A
CG33462	FBgn0053462	0.431397	0.723312	0.139481	5.41462	-0.727762	0.0828996	#N/A	#N/A	#N/A	#N/A	#N/A	#N/A
CG31300	FBgn0051300	0.431381	0.724308	0.138454	-0.274915	0.0262222	0.174538	0.201953	0.216157	0.187749	#DIV/0!	#DIV/0!	#DIV/0!
CG7903	FBgn0039730	0.431351	0.470575	0.392128	0.0947961	0.0147573	0.0413091	0.437259	0.46966	0.404858	-0.476618	-0.577639	-0.561903
CG31102	FBgn0051102	0.430771	0.362617	0.498926	-0.0469772	0.102847	0.0681162	0.223304	0.145288	0.301319	#DIV/0!	#DIV/0!	#DIV/0!
Csas	FBgn0052220	0.430319	0.521556	0.339082	-0.131977	-0.0868361	-0.0101563	#N/A	#N/A	#N/A	#N/A	#N/A	#N/A
CG43354	FBgn0263086	0.42951	-0.1801	1.03912	-0.738841	0.571021	-0.691986	#N/A	#N/A	#N/A	#N/A	#N/A	#N/A
CG8072	FBgn0036070	0.429485	0.164738	0.694231	0.445159	1.71492	0.0480873	#N/A	#N/A	#N/A	#N/A	#N/A	#N/A
CG9471	FBgn0037749	0.429156	0.563323	0.294989	-0.262477	-0.081104	-0.037775	0.163757	0.261152	0.0663618	-0.21891	-0.102726	-0.00721702
Rootletin	FBgn0039152	0.42893	-0.118305	0.976165	-0.514153	-0.412118	-1.10732	0.168037	0.0828006	0.253273	#DIV/0!	#DIV/0!	#DIV/0!
pn	FBgn0003116	0.42837	0.484128	0.372612	0.0726833	0.0308816	0.115089	0.378036	0.360287	0.395784	0.169744	0.259143	0.331374
CG4692	FBgn0035032	0.428253	0.341991	0.514515	-0.245227	-0.164266	-0.211552	0.12505	0.13487	0.11523	-0.0585601	-0.0193967	-0.0576229
Ugt86Dh	FBgn0040252	0.42785	0.443014	0.412686	-0.864447	-0.134441	-0.109854	#N/A	#N/A	#N/A	#N/A	#N/A	#N/A
snoRNA:CG31191-a	FBgn0263460	0.427761	1.03987	-0.184352	0.0219795	-0.295661	0.736169	#N/A	#N/A	#N/A	#N/A	#N/A	#N/A
CG10663	FBgn0036287	0.42712	0.511211	0.34303	-0.0276786	-0.241616	-0.16635	#N/A	#N/A	#N/A	#N/A	#N/A	#N/A
Cyp4e2	FBgn0014469	0.427024	0.461236	0.392813	-0.0261578	0.0910924	0.115699	0.690048	0.729437	0.650659	0.0923393	0.154585	-0.0217718
snoRNA:Psi28S-3571	FBgn0082954	0.42681	0.534941	0.318679	0.167462	-0.249947	0.0498617	#N/A	#N/A	#N/A	#N/A	#N/A	#N/A
CG8066	FBgn0038243	0.426787	0.454069	0.399506	0.0697728	0.0746939	0.14109	0.979854	0.866645	1.09306	#DIV/0!	-1.29378	-1.05999
CG9410	FBgn0033086	0.42659	0.422042	0.431137	-0.202754	-0.128092	-0.146183	-0.154949	-0.0952511	-0.214648	-0.0583298	0.464966	0.581489
GstS1	FBgn0010226	0.424728	0.27072	0.578736	-0.00235723	0.0233951	-0.0670159	-0.277027	-0.221624	-0.332431	-0.103301	-0.147095	-0.062709
CG6836	FBgn0036834	0.424528	0.480949	0.368107	-0.132867	-0.110771	-0.0736859	#N/A	#N/A	#N/A	#N/A	#N/A	#N/A
CG14880	FBgn0038422	0.424384	0.461813	0.386955	-0.247105	-0.114131	-0.0483629	-0.0816661	-0.184255	0.0209227	#DIV/0!	#DIV/0!	#DIV/0!
CG10924	FBgn0034356	0.423752	0.558473	0.28903	-0.332599	-0.349366	-0.354654	-0.318298	-0.336481	-0.300115	0.223478	0.0115174	0.215138
CG34298	FBgn0085327	0.423281	0.133091	0.71347	-0.573127	-0.116353	-2.21545	#N/A	#N/A	#N/A	#N/A	#N/A	#N/A
CheA84a	FBgn0261290	0.422615	0.519335	0.325894	-0.382165	-0.0994985	-0.0564877	#N/A	#N/A	#N/A	#N/A	#N/A	#N/A
CG11982	FBgn0037653	0.422335	0.393011	0.45166	0.13568	0.064683	0.0541054	#N/A	#N/A	#N/A	#N/A	#N/A	#N/A
Cog7	FBgn0051040	0.422071	0.42615	0.417993	0.00336126	0.0598082	0.0502536	-0.132852	-0.077753	-0.187952	#DIV/0!	#DIV/0!	#DIV/0!
CG3823	FBgn0029863	0.422067	1.16415	-0.320019	-0.0408541	-0.670696	0.591589	#N/A	#N/A	#N/A	#N/A	#N/A	#N/A
CG14742	FBgn0037997	0.421828	0.586437	0.25722	-0.0351652	-0.00787719	-0.0521109	#N/A	#N/A	#N/A	#N/A	#N/A	#N/A
loqs	FBgn0032515	0.421687	0.403029	0.440344	0.081051	0.0459452	0.05739	-0.604343	-0.624218	-0.584467	#DIV/0!	#DIV/0!	#DIV/0!
CG32039	FBgn0052039	0.421346	0.426954	0.415739	0.0260536	-0.0156292	0.0138254	#DIV/0!	#DIV/0!	#DIV/0!	#DIV/0!	#DIV/0!	#DIV/0!
CG17242	FBgn0250841	0.420818	-0.229356	1.07099	-1.78436	1.62787	-3.08787	0.308055	1.44475	-0.828643	-0.560132	-0.620987	1.80235
CG11099	FBgn0034485	0.420197	0.300343	0.540051	-0.366345	-0.363386	-0.399361	#N/A	#N/A	#N/A	#N/A	#N/A	#N/A
CG11191	FBgn0033249	0.419383	0.436504	0.402262	-0.209789	-0.134931	-0.144921	#N/A	#N/A	#N/A	#N/A	#N/A	#N/A
Yp3	FBgn0004047	0.418061	0.928352	-0.0922297	1.14608	1.13219	0.938373	-0.545349	-0.440891	-0.649806	0.114236	0.532727	0.768305
CG32985	FBgn0052985	0.417865	-0.523041	1.35877	-0.0664721	1.35258	-0.483109	0.492256	0.131052	0.85346	1.16876	0.258184	0.499472
Mal-A2	FBgn0002569	0.417285	0.55023	0.28434	-0.256486	0.159314	0.141698	0.475427	0.372934	0.577921	-0.65562	0.491662	-0.0972885
CG9279	FBgn0036882	0.417209	0.284398	0.550021	-0.0322026	-0.128118	-0.248226	-0.238737	-0.254642	-0.222833	-0.188859	-0.0670174	-0.100146
CG43349	FBgn0263081	0.415444	0.268163	0.562724	-0.31021	0.143589	0.0348556	#N/A	#N/A	#N/A	#N/A	#N/A	#N/A
CG31431	FBgn0051431	0.415116	0.511859	0.318373	-0.143878	-0.0509027	0.0602723	#N/A	#N/A	#N/A	#N/A	#N/A	#N/A
CG5524	FBgn0039164	0.414961	0.233319	0.596603	0.218998	0.0752053	-0.00739866	#N/A	#N/A	#N/A	#N/A	#N/A	#N/A
CG8814	FBgn0031478	0.414555	0.387713	0.441397	-0.0757176	-0.0369038	0.0127282	0.559171	0.41534	0.703003	0.0393339	-0.0619973	-0.448047
CG10320	FBgn0034645	0.413519	0.29975	0.527287	-0.12254	-0.0501705	-0.0176409	0.193575	0.2159	0.171249	-0.22382	-0.22245	-0.269331
CG12171	FBgn0037354	0.412152	0.535056	0.289247	-0.133158	0.0511824	0.101446	-0.30975	-0.393977	-0.225522	-0.163865	0.317073	0.442476
CG11236	FBgn0031860	0.412015	0.492241	0.331789	-0.0848347	-0.0143909	0.0730294	0.329995	0.295849	0.364141	#DIV/0!	#DIV/0!	#DIV/0!
CG1983	FBgn0039751	0.411489	0.4716	0.351378	0.0671574	-0.00573785	0.0174963	0.0161656	-0.00978585	0.042117	0.195823	0.252123	0.315615
CG43293	FBgn0262985	0.41123	0.0623886	0.760072	0.524303	-0.186019	-1.18926	#N/A	#N/A	#N/A	#N/A	#N/A	#N/A
RpS12	FBgn0260441	0.411094	0.37176	0.450428	0.0909037	0.0698434	0.0391707	0.0507685	0.0287662	0.0727709	0.0977403	0.0575992	0.112736
CG13865	FBgn0039965	0.410995	0.414117	0.407872	0.0282162	-0.0540356	0.0146046	-0.0245117	0.0559404	-0.104964	-0.0375065	-0.0852202	0.0418608
Trap1	FBgn0026761	0.410471	0.337584	0.483357	0.230497	0.157977	0.152538	0.277007	0.178567	0.375447	0.240063	0.20675	0.23523
CG9166	FBgn0029514	0.410333	0.547526	0.273139	-0.0985587	-0.132443	0.00865603	0.420517	0.301602	0.539432	#DIV/0!	#DIV/0!	#DIV/0!
Poc1	FBgn0036354	0.410182	0.0363523	0.784012	0.637309	0.474759	-0.175633	#N/A	#N/A	#N/A	#N/A	#N/A	#N/A
CG5623	FBgn0038357	0.410036	0.1558	0.664273	-2.32245	0.0332395	-2.40878	#N/A	#N/A	#N/A	#N/A	#N/A	#N/A
Rh4	FBgn0003250	0.409179	0.165889	0.652469	1.12578	0.852535	0.823806	#N/A	#N/A	#N/A	#N/A	#N/A	#N/A
CG40486	FBgn0263830	0.408367	0.642387	0.174347	-0.791546	-0.647055	-0.290873	#N/A	#N/A	#N/A	#N/A	#N/A	#N/A
orb2	FBgn0264307	0.408072	0.282332	0.533813	-0.0986704	-0.210299	-0.410366	0.0880527	0.0982345	0.0778708	-0.300211	-0.203196	-0.28603
CG6421	FBgn0025827	0.407817	0.449603	0.36603	-0.0126033	-0.00164836	0.0299575	0.118186	0.240485	-0.00411183	#DIV/0!	#DIV/0!	#DIV/0!
mRpL17	FBgn0035122	0.407635	0.307136	0.508133	-0.229516	-0.0994487	-0.0756681	0.918609	0.588691	1.24853	-0.489219	-0.487677	-0.760537
CG18536	FBgn0034322	0.40694	0.284883	0.528996	-0.179069	0.0279033	0.0341673	#N/A	#N/A	#N/A	#N/A	#N/A	#N/A
HtrA2	FBgn0038233	0.406779	0.498948	0.31461	0.134989	-0.153034	-0.0963355	0.0420827	0.0746905	0.0094749	0.178102	0.240314	0.253301
CG30354	FBgn0050354	0.406609	-0.0477717	0.86099	-0.362892	0.0570185	-0.55502	#DIV/0!	#DIV/0!	#DIV/0!	#DIV/0!	#DIV/0!	#DIV/0!
VhaM9.7-a	FBgn0035521	0.405606	0.317719	0.493492	-0.175861	-0.141569	-0.111887	-0.284305	-0.354649	-0.213961	-0.105728	0.47842	0.249753
CG10934	FBgn0034263	0.405586	-0.0938261	0.904998	0.071822	-0.197073	-3.25104	#N/A	#N/A	#N/A	#N/A	#N/A	#N/A
mir-4985	FBgn0263546	0.405585	0.143642	0.667528	0.20273	-0.207066	-0.0590939	#N/A	#N/A	#N/A	#N/A	#N/A	#N/A
CG9205	FBgn0035181	0.405409	0.435357	0.375462	-0.0019914	-0.0526103	-0.0306629	0.0310267	0.0848806	-0.0228271	#DIV/0!	#DIV/0!	#DIV/0!
CG4186	FBgn0040634	0.405219	0.195385	0.615053	-0.291753	-0.285208	-0.300862	0.0252092	0.104695	-0.0542766	-0.0941477	-0.0205717	0.193802
GRHRII	FBgn0036278	0.404198	0.742969	0.0654283	-0.254202	-0.145748	0.0167955	#N/A	#N/A	#N/A	#N/A	#N/A	#N/A
CG33233	FBgn0053233	0.403837	0.242956	0.564719	-0.513522	-0.546853	-0.811109	#N/A	#N/A	#N/A	#N/A	#N/A	#N/A
CG3192	FBgn0029888	0.403823	0.363517	0.444129	-0.187122	-0.160441	-0.184704	0.114665	0.197299	0.0320306	0.0141625	-0.108344	-0.0708427
CG12079	FBgn0035404	0.403648	0.396461	0.410836	-0.107544	-0.0535678	-0.0513967	#N/A	#N/A	#N/A	#N/A	#N/A	#N/A
CG43068	FBgn0262478	0.403502	0.134434	0.672569	-0.210077	-0.102149	-0.973085	#N/A	#N/A	#N/A	#N/A	#N/A	#N/A
CG6231	FBgn0038720	0.403277	0.595397	0.211156	0.0080839	-0.10893	-0.0758535	0.212827	0.381096	0.0445591	0.270366	-0.150196	-0.0275101
CG18815	FBgn0042138	0.403059	0.449482	0.356636	-0.021018	-0.0418634	-0.0133759	0.137678	0.0973277	0.178028	0.143334	0.286836	0.393345
mtacp1	FBgn0011361	0.402664	0.291144	0.514183	-0.182611	-0.149164	-0.182511	0.0597072	0.155759	-0.0363448	0.0624458	0.0763817	-0.444117
cype	FBgn0015031	0.402631	0.401315	0.403947	-0.14552	-0.0206332	0.0120858	0.510327	0.595554	0.425101	-0.223959	-0.113497	-0.0789954
Cat	FBgn0000261	0.402404	0.586579	0.218229	0.0994169	-0.0049091	0.0458698	0.26791	0.268261	0.267559	0.185929	0.198453	0.445565
CG3609	FBgn0031418	0.401218	0.54421	0.258226	-0.0939393	0.00239474	0.0679293	0.104167	0.0253281	0.183007	-0.26526	0.227888	0.452006
CG43702	FBgn0263841	0.400734	0.150219	0.651249	0.413944	-0.480231	-0.844005	#N/A	#N/A	#N/A	#N/A	#N/A	#N/A
CG1443	FBgn0039620	0.400511	0.680928	0.120094	0.0313832	-0.086583	-0.00245978	0.429352	0.534641	0.324063	#DIV/0!	#DIV/0!	#DIV/0!
CG14995	FBgn0035497	0.400451	0.213468	0.587434	-0.0538329	-0.0840781	-0.212412	-0.415734	-0.354743	-0.476724	0.510369	0.36157	0.422581
CG12269	FBgn0038665	0.400239	0.602741	0.197738	-0.109563	-0.070641	-0.159516	0.345001	0.444751	0.245251	-0.149339	0.0986344	-0.0953361
CG32551	FBgn0052551	0.400228	0.516336	0.28412	-0.119563	0.0380643	0.0451303	#N/A	#N/A	#N/A	#N/A	#N/A	#N/A
CG10254	FBgn0027512	0.400135	0.275741	0.524529	-0.0751546	-0.186167	-0.298319	0.157612	0.20462	0.110604	#DIV/0!	#DIV/0!	#DIV/0!
CR32745	FBgn0052745	0.399365	1.64137	-0.842644	0.415758	-0.230892	0.683795	#N/A	#N/A	#N/A	#N/A	#N/A	#N/A
Plip	FBgn0039111	0.398144	0.558463	0.237825	-0.148734	-0.16576	-0.0698641	0.0398879	0.112768	-0.0329924	0.16209	0.291711	0.445542
CG43066	FBgn0262476	0.397776	0.208956	0.586596	-0.331906	-0.279861	-0.269868	0.22435	0.160311	0.288388	0.152571	0.209813	-0.0485477
Aldh-III	FBgn0010548	0.397741	0.449513	0.345968	-0.165012	-0.0534329	-0.0228952	0.530607	0.544086	0.517128	0.137365	0.120895	0.00624721
CG14892	FBgn0038447	0.39757	0.544481	0.25066	-0.260784	-0.0763208	0.0799485	#N/A	#N/A	#N/A	#N/A	#N/A	#N/A
Hydr1	FBgn0033382	0.397166	0.514703	0.279629	-0.134162	-0.00744289	-0.0364736	0.330564	0.43137	0.229758	-0.325461	-0.189002	-0.63815
aru	FBgn0029095	0.396803	0.486475	0.307132	0.0281557	0.00463451	-0.0245401	0.172653	0.209557	0.135749	0.0476829	-0.0118066	-0.130704
CG7841	FBgn0036502	0.396796	0.290551	0.503041	-0.267848	-0.156257	-0.229857	-0.138781	-0.22851	-0.049052	#DIV/0!	-0.100361	-0.0147695
CG8257	FBgn0033900	0.396789	0.367558	0.426019	0.0243104	-0.0241675	-0.11881	-0.000457015	-0.034133	0.033219	#DIV/0!	#DIV/0!	#DIV/0!
CG11474	FBgn0034688	0.395978	0.318172	0.473785	-0.177092	-0.162206	-0.152297	0.0714063	0.124977	0.0178355	-0.00674439	-0.0138846	0.195846
CG8317	FBgn0034140	0.39558	0.784056	0.00710515	0.148869	0.117908	0.248403	0.120047	0.510317	-0.270223	#DIV/0!	#DIV/0!	#DIV/0!
CG2453	FBgn0030460	0.393501	0.456801	0.330202	0.311702	0.192389	0.25435	-0.0715716	0.0613574	-0.204501	0.243521	0.245899	0.326183
SdhB	FBgn0014028	0.393486	0.512905	0.274067	-0.175668	-0.0750831	-0.064856	0.24381	0.26488	0.22274	-0.273322	-0.0313239	0.132057
CG6218	FBgn0038321	0.393171	0.335744	0.450598	0.0132608	0.0012115	-0.0512378	0.115448	0.0833959	0.1475	-0.321834	0.187601	0.0835316
CG11454	FBgn0031224	0.392727	0.443412	0.342042	0.131146	0.00263371	0.0409968	#N/A	#N/A	#N/A	#N/A	#N/A	#N/A
CG11876	FBgn0039635	0.392672	0.227803	0.557541	-0.320575	-0.243201	-0.313148	0.157223	0.147658	0.166789	-0.0588568	-0.0008514	0.0760936
CG18522	FBgn0038347	0.39266	0.464945	0.320374	-0.0956423	0.0719604	0.0592719	#N/A	#N/A	#N/A	#N/A	#N/A	#N/A
GlyP	FBgn0004507	0.392418	0.246206	0.53863	-0.307762	-0.221401	-0.298397	-0.0323009	0.00992865	-0.0745305	-0.208643	-0.189311	-0.0287909
CG18624	FBgn0029971	0.392236	0.381353	0.40312	-0.114951	-0.031181	-0.0284283	0.289318	0.473997	0.104638	0.0646185	-0.308834	-0.211712
CG43165	FBgn0262721	0.392161	0.426331	0.357991	0.750124	0.0851657	0.29107	#N/A	#N/A	#N/A	#N/A	#N/A	#N/A
SPR	FBgn0029768	0.391939	0.327068	0.456809	-0.109638	-0.0599292	-0.0938162	#N/A	#N/A	#N/A	#N/A	#N/A	#N/A
CG4334	FBgn0038312	0.391916	0.702995	0.0808368	-0.00943937	0.00251861	0.252374	#N/A	#N/A	#N/A	#N/A	#N/A	#N/A
CG6409	FBgn0036106	0.390718	0.572386	0.209051	0.0598729	0.0554779	0.0910047	0.773595	0.934423	0.612767	0.265556	0.187785	0.312063
PKD	FBgn0038603	0.390601	0.438018	0.343184	-0.072409	-0.0148621	-0.00872519	0.526457	0.582698	0.470217	#DIV/0!	#DIV/0!	#DIV/0!
Cpr100A	FBgn0039805	0.390411	0.349454	0.431369	-0.631882	-0.306063	-0.298152	0.450045	0.44757	0.45252	-0.550897	-0.631581	-1.10452
CG13639	FBgn0039236	0.390261	-0.11053	0.891051	-0.0850499	-0.0993722	-0.293918	#N/A	#N/A	#N/A	#N/A	#N/A	#N/A
Cyp4p3	FBgn0033397	0.389728	0.224476	0.554979	0.0177469	0.113264	-0.019364	#N/A	#N/A	#N/A	#N/A	#N/A	#N/A
CG3626	FBgn0029706	0.388405	0.36768	0.40913	0.00449547	-0.0648307	-0.0687413	0.0218975	0.00402642	0.0397687	0.0369607	-0.102046	-0.0784978
ND42	FBgn0019957	0.388277	0.300954	0.4756	-0.227283	-0.140043	-0.178526	0.0956318	0.137853	0.0534102	-0.205634	-0.103359	-0.0438991
CG42361	FBgn0259707	0.388087	0.320273	0.455901	-0.0756864	-0.207616	-0.155212	0.0174987	-0.0414171	0.0764146	#DIV/0!	#DIV/0!	#DIV/0!
CG6048	FBgn0029827	0.387995	0.420995	0.354995	-0.0654422	0.160618	0.226141	#N/A	#N/A	#N/A	#N/A	#N/A	#N/A
CG15734	FBgn0030374	0.387431	0.306377	0.468484	-0.0836087	-0.603895	-0.792747	#N/A	#N/A	#N/A	#N/A	#N/A	#N/A
CG3719	FBgn0024986	0.387196	0.380278	0.394115	-0.0510031	-0.0730549	-0.0501049	-0.275383	0.0974601	-0.648226	-0.552965	-0.565783	-0.25789
CR43932	FBgn0264553	0.387086	-0.447428	1.2216	-0.0965553	0.826232	-0.343801	#N/A	#N/A	#N/A	#N/A	#N/A	#N/A
CG8451	FBgn0031998	0.387077	0.476563	0.297592	-0.198357	0.0133116	0.0301442	0.729598	0.910856	0.54834	#DIV/0!	#DIV/0!	#DIV/0!
CG33098	FBgn0053098	0.386705	0.384444	0.388965	-0.254097	-0.131427	-0.0889202	0.122567	0.152001	0.0931333	0.0133459	0.0728516	0.0577342
Amy-p	FBgn0000079	0.386347	0.95501	-0.182317	-0.0792291	-0.018675	0.0632685	-0.347821	-0.252606	-0.443036	0.687861	0.260209	0.265101
l(1)G0230	FBgn0028342	0.386319	0.220015	0.552622	-0.182173	-0.125886	-0.161774	0.114358	0.133215	0.0955024	-0.0188735	-0.021703	0.0940198
CG30178	FBgn0050178	0.385712	0.186949	0.584476	0.0603434	-0.221119	-0.36888	#N/A	#N/A	#N/A	#N/A	#N/A	#N/A
CG6044	FBgn0034725	0.385167	0.318369	0.451965	-0.157392	-0.167698	-0.2026	0.267396	0.135091	0.3997	#DIV/0!	#DIV/0!	#DIV/0!
mRpL20	FBgn0036335	0.385129	0.545735	0.224523	-0.157628	-0.043779	0.0205571	0.963498	0.646834	1.28016	-0.752662	-0.469055	-0.580109
CG8519	FBgn0035711	0.385025	0.474505	0.295545	-0.162703	-0.246277	-0.188751	0.023538	0.0216686	0.0254074	0.323904	0.344317	0.375731
Tom70	FBgn0032397	0.384908	0.223504	0.546311	0.195086	-0.0305741	-0.194781	-0.14884	-0.219175	-0.0785044	-0.0816622	-0.0727709	-0.368194
CG5214	FBgn0037891	0.384528	0.300208	0.468849	-0.214126	-0.0621497	-0.118556	0.0980183	0.137636	0.0584004	-0.162702	-0.0811119	0.0419383
CG34117	FBgn0083953	0.384528	0.535891	0.233165	-0.0479386	0.0102656	0.0737916	0.0148877	0.0862259	-0.0564505	-0.243228	0.237293	0.246404
Pk1r	FBgn0038201	0.38445	0.225609	0.543292	-0.120621	-0.127666	-0.0175602	#N/A	#N/A	#N/A	#N/A	#N/A	#N/A
CG43371	FBgn0263114	0.38375	0.0719173	0.695583	-0.678239	0.0171688	-1.49858	#N/A	#N/A	#N/A	#N/A	#N/A	#N/A
CG40002	FBgn0058002	0.383698	0.251152	0.516244	-0.185523	-0.109934	-0.103725	#N/A	#N/A	#N/A	#N/A	#N/A	#N/A
CCHa1	FBgn0038199	0.383678	0.441334	0.326021	-0.00802419	0.0150157	-0.00207425	#N/A	#N/A	#N/A	#N/A	#N/A	#N/A
CG16985	FBgn0035355	0.383356	0.520873	0.245839	-0.139243	-0.0637574	0.0841679	0.281973	0.246925	0.317021	-0.252493	-0.0625232	0.0690404
CG8001	FBgn0035268	0.383295	0.346602	0.419988	0.0831141	-0.0680411	-0.0477269	0.291171	0.274376	0.307965	#DIV/0!	#DIV/0!	#DIV/0!
CG7630	FBgn0040793	0.383007	0.326653	0.439361	-0.212577	-0.138965	-0.13959	0.452339	0.534528	0.370149	0.202257	0.391065	0.384538
CG11029	FBgn0031735	0.382916	1.13924	-0.373403	0.33084	-0.140943	0.7498	#N/A	#N/A	#N/A	#N/A	#N/A	#N/A
CG7148	FBgn0046301	0.382846	0.391459	0.374233	-0.204716	-0.215316	-0.272191	#N/A	#N/A	#N/A	#N/A	#N/A	#N/A
CG42822	FBgn0262004	0.382776	0.951104	-0.185552	0.472506	0.0309824	0.177524	#N/A	#N/A	#N/A	#N/A	#N/A	#N/A
miple	FBgn0027111	0.382699	0.2628	0.502599	-0.11298	-0.102904	-0.136536	#N/A	#N/A	#N/A	#N/A	#N/A	#N/A
CG8931	FBgn0030717	0.382312	0.409616	0.355008	-0.0651478	-0.159508	-0.126173	0.0716607	0.145791	-0.00246961	0.0560228	-0.344674	-0.409396
CG15912	FBgn0029712	0.381912	0.702873	0.0609507	-0.356536	-0.222593	0.0156376	-0.0281904	0.160942	-0.217323	0.150692	0.456814	0.302646
CG17919	FBgn0037433	0.381793	0.508461	0.255124	-0.06233	-0.0483803	-0.00656657	0.246639	0.365558	0.127721	0.166723	0.24926	0.536016
CG17322	FBgn0027070	0.381358	0.313359	0.449356	0.136815	0.0519485	0.106703	0.412828	0.407975	0.417681	0.323727	-0.056652	-0.0281798
CG30427	FBgn0043792	0.381021	0.502767	0.259275	-0.208386	-0.110766	0.0309214	1.3338	1.12037	1.54723	-0.237052	-0.869777	-1.68421
CG13526	FBgn0034774	0.380347	0.0907557	0.669939	-1.90805	-0.0627877	-2.22815	#N/A	#N/A	#N/A	#N/A	#N/A	#N/A
CG2765	FBgn0035087	0.380268	0.653996	0.106541	0.0222403	-0.0836925	-0.0839249	-0.371401	-0.370324	-0.372479	#DIV/0!	#DIV/0!	#DIV/0!
CG12179	FBgn0025388	0.379997	0.222908	0.537087	0.353017	-0.00878204	-0.195365	#N/A	#N/A	#N/A	#N/A	#N/A	#N/A
CG3621	FBgn0025839	0.379725	0.396434	0.363016	-0.127986	-0.0535617	-0.0200652	0.101814	0.142289	0.0613398	-0.351365	-0.110906	-0.0870535
Fis1	FBgn0039969	0.379067	0.385265	0.372869	0.0298787	0.00820676	0.0220949	0.39398	0.377178	0.410781	0.0316332	0.0726767	0.125399
bond	FBgn0260942	0.379013	0.634114	0.123912	-0.121957	-0.231087	-0.0581308	#N/A	#N/A	#N/A	#N/A	#N/A	#N/A
CoIV	FBgn0032833	0.378682	0.366061	0.391304	-0.227554	-0.131967	-0.123526	0.542331	0.625362	0.4593	-0.216974	-0.124807	-0.234673
CG30491	FBgn0050491	0.378473	0.393097	0.363849	0.0342658	-0.0884173	0.00878228	0.113022	0.121225	0.104819	-0.112941	-0.0459372	-0.18304
CG5065	FBgn0034145	0.378132	0.721815	0.0344501	0.0448624	-0.105274	0.039798	0.498424	0.536908	0.459941	0.438369	0.786473	-0.229291
tan	FBgn0028980	0.376787	0.281793	0.47178	0.0492272	-0.0994436	-0.133128	#N/A	#N/A	#N/A	#N/A	#N/A	#N/A
CG14613	FBgn0031188	0.376584	0.338049	0.41512	0.100547	0.0266383	0.0106485	0.397913	0.461158	0.334669	#DIV/0!	#DIV/0!	#DIV/0!
CG4495	FBgn0031893	0.376508	0.296984	0.456032	0.0284814	-0.0049497	0.0284364	-0.054741	-0.152479	0.0429966	0.107516	0.159726	-0.0706812
vri	FBgn0016076	0.376231	0.458361	0.2941	0.0396643	0.0323267	0.0121453	#N/A	#N/A	#N/A	#N/A	#N/A	#N/A
CG32392	FBgn0052392	0.37608	0.151806	0.600353	-0.343211	-0.330107	-0.649185	#N/A	#N/A	#N/A	#N/A	#N/A	#N/A
CG43841	FBgn0264393	0.375988	0.394068	0.357907	-0.0815842	0.0410742	0.0545072	#N/A	#N/A	#N/A	#N/A	#N/A	#N/A
CG9740	FBgn0037669	0.375255	0.443109	0.3074	0.117356	-0.0811033	0.0248494	0.146765	0.216636	0.0768934	#DIV/0!	#DIV/0!	#DIV/0!
CG30094	FBgn0050094	0.374711	0.373304	0.376119	0.0665729	-0.0220112	-0.0162132	0.0924377	0.0732931	0.111582	#DIV/0!	#DIV/0!	#DIV/0!
CG9238	FBgn0036428	0.374498	0.404459	0.344538	-0.0430602	-0.0551239	-0.0359007	0.107344	0.153029	0.0616588	#DIV/0!	#DIV/0!	#DIV/0!
Rbp9	FBgn0010263	0.373803	0.336425	0.41118	-0.131238	-0.0935593	-0.136764	-0.207309	-0.291052	-0.123567	-0.213993	-0.10245	-0.265021
CG30389	FBgn0050389	0.373631	0.332413	0.414849	0.0483109	-0.0825858	-0.0582249	0.086611	-0.00586833	0.17909	#DIV/0!	#DIV/0!	#DIV/0!
CG12209	FBgn0033498	0.373419	0.0956877	0.65115	0.638838	0.103192	-1.67402	#N/A	#N/A	#N/A	#N/A	#N/A	#N/A
7B2	FBgn0041707	0.3733	0.310454	0.436146	-0.135834	-0.0653637	-0.0924061	#N/A	#N/A	#N/A	#N/A	#N/A	#N/A
CG9147	FBgn0031774	0.373232	0.454015	0.292449	-0.098303	-0.146995	-0.181841	0.506209	0.402998	0.609421	#DIV/0!	#DIV/0!	#DIV/0!
CG6180	FBgn0032453	0.372722	0.385442	0.360002	-0.0235143	0.0283694	0.0624758	-0.0266892	0.00608394	-0.0594624	-0.164339	-0.161868	-0.0756323
CG7724	FBgn0036698	0.372676	0.353211	0.392142	-0.283144	-0.112544	-0.0313408	1.59015	1.48386	1.69643	0.04076	-0.267655	-0.795693
CG10730	FBgn0032843	0.372642	-0.164989	0.910273	0.371414	0.33534	-0.387937	#N/A	#N/A	#N/A	#N/A	#N/A	#N/A
CG11120	FBgn0039250	0.371791	0.344	0.399582	0.943041	0.318788	0.516344	#N/A	#N/A	#N/A	#N/A	#N/A	#N/A
CG9548	FBgn0031822	0.37132	0.371688	0.370952	0.139264	0.0178817	0.0821471	0.779968	0.723004	0.836932	-0.375457	-0.73112	-0.878963
pgant4	FBgn0051956	0.370419	0.864808	-0.12397	0.119564	-0.0228795	0.225288	0.0226311	0.233449	-0.188187	-0.416795	0.0145928	0.0683999
Gs1	FBgn0001142	0.370373	0.317698	0.423048	0.267201	0.146966	0.177875	0.331327	0.172755	0.489898	0.495113	0.412353	0.321458
ttm50	FBgn0250874	0.369829	0.327495	0.412162	-0.0882064	-0.0790138	-0.0763574	0.128478	0.199785	0.057171	-0.22393	-0.28344	-0.363119
obst-B	FBgn0027600	0.368778	0.102478	0.635078	-0.162461	-0.161476	-0.0675228	0.60742	0.523559	0.691281	#DIV/0!	#DIV/0!	#DIV/0!
CG2064	FBgn0033205	0.367585	0.0591494	0.67602	0.0639782	0.236825	0.117055	0.682365	0.315553	1.04918	-0.234419	-0.348756	-1.02952
ATPsyn-Cf6	FBgn0016119	0.367254	0.296592	0.437915	-0.224314	-0.133411	-0.118681	0.138903	0.147299	0.130507	-0.0423811	-0.0357002	0.0892733
NP15.6	FBgn0027785	0.366958	0.193147	0.540768	-0.259636	-0.211078	-0.233952	0.155389	0.182788	0.12799	0.0518156	-0.0655901	-0.158504
CG30411	FBgn0050411	0.366943	0.457298	0.276588	-0.461902	0.00943316	0.0163213	#N/A	#N/A	#N/A	#N/A	#N/A	#N/A
CG32939	FBgn0052939	0.366803	0.421621	0.311986	-0.0343392	-0.0921677	-0.0447054	#N/A	#N/A	#N/A	#N/A	#N/A	#N/A
Rcd-1	FBgn0031047	0.366786	0.325602	0.40797	-0.0156344	-0.147626	-0.121132	0.0961573	0.013491	0.178824	#DIV/0!	#DIV/0!	#DIV/0!
CanB	FBgn0010014	0.366492	0.319073	0.41391	-0.146614	-0.169391	-0.177158	-0.0300464	0.00604181	-0.0661347	-0.229146	0.0604634	0.148736
Scp2	FBgn0020907	0.366201	0.211186	0.521216	-0.295334	-0.130128	-0.170078	0.133063	0.000949765	0.265177	-0.459815	-0.0448418	-0.102267
CG7598	FBgn0039689	0.36574	0.327847	0.403633	0.0319419	-0.0119004	-0.0539113	-0.486255	-0.456023	-0.516486	0.565284	0.615245	0.54635
blw	FBgn0011211	0.364955	0.180649	0.549261	-0.232295	-0.121307	-0.173256	0.121498	0.146134	0.0968617	-0.0654869	-0.0617296	0.0299225
CG18136	FBgn0036839	0.364938	0.321982	0.407894	-0.449312	-0.300151	-0.40617	-0.107964	-0.0597034	-0.156224	-0.140466	-0.198715	-0.122538
CG1418	FBgn0033468	0.364879	0.230655	0.499103	0.116929	-0.0836842	-0.156166	#N/A	#N/A	#N/A	#N/A	#N/A	#N/A
Act87E	FBgn0000046	0.36478	0.372852	0.356709	0.0543097	-0.0904728	-0.221161	#N/A	#N/A	#N/A	#N/A	#N/A	#N/A
Mlp60A	FBgn0259209	0.364757	0.237155	0.492359	0.082286	-0.0654237	-0.0983273	0.186141	0.215069	0.157214	0.220379	0.141101	0.272284
CG31706	FBgn0051706	0.364307	0.42798	0.300634	0.165958	0.104705	0.104945	#N/A	#N/A	#N/A	#N/A	#N/A	#N/A
Prx2540-1	FBgn0033520	0.364095	0.0271361	0.701054	0.0582066	0.0746672	0.0693238	-0.0458157	-0.0977151	0.00608377	0.36462	-0.12347	0.409748
CG17221	FBgn0031500	0.364076	0.379052	0.349099	0.148953	0.136876	0.196996	0.39813	0.446994	0.349267	0.476809	0.324609	0.269425
DOR	FBgn0035542	0.363755	0.299425	0.428085	-0.116629	-0.16301	-0.225839	0.0224107	0.0259295	0.0188918	#DIV/0!	#DIV/0!	#DIV/0!
CG16820	FBgn0032495	0.363716	0.390216	0.337217	-0.441228	-0.400794	-0.341755	0.0837879	0.0321086	0.135467	0.262135	0.203456	0.28154
CG31380	FBgn0051380	0.3637	0.557763	0.169636	-0.216401	0.136994	0.148394	#N/A	#N/A	#N/A	#N/A	#N/A	#N/A
COQ7	FBgn0029502	0.362197	0.348818	0.375576	0.162501	0.0721185	0.0665183	-0.0516778	-0.013152	-0.0902037	0.117038	0.205812	0.152918
CG7408	FBgn0036765	0.361972	0.417787	0.306158	-0.103748	-0.0527798	0.0675583	0.596669	0.648341	0.544998	0.271776	0.347397	0.189604
CG43107	FBgn0262567	0.36162	0.371319	0.351922	-0.15557	-0.159627	-0.101109	#N/A	#N/A	#N/A	#N/A	#N/A	#N/A
CG1441	FBgn0033464	0.36111	0.207994	0.514226	-0.241725	-0.125144	-0.118244	1.05709	0.849635	1.26454	0.404318	0.161375	-0.526218
CG17378	FBgn0031858	0.360976	0.198362	0.52359	-0.0231222	-0.268559	-0.344866	#N/A	#N/A	#N/A	#N/A	#N/A	#N/A
Pbgs	FBgn0036271	0.36061	0.673819	0.0474012	-0.202288	-0.0834852	0.161189	0.173832	0.178286	0.169377	-0.230268	-0.131422	-0.152475
CG33970	FBgn0053970	0.360367	0.517333	0.203401	-0.19141	-0.0357448	0.01362	1.08863	1.06239	1.11486	0.339203	0.124144	-0.483529
sun	FBgn0014391	0.360161	0.222354	0.497968	-0.414824	-0.324746	-0.361403	0.115442	0.150043	0.0808403	-0.176841	-0.0839111	0.0120981
Aph-4	FBgn0016123	0.359487	0.0961787	0.622795	-0.24592	0.06959	-0.114573	0.271626	0.416858	0.126395	-0.590095	-0.0591188	0.373308
CG1827	FBgn0033431	0.359233	0.414272	0.304194	0.0250874	-0.0197974	0.0106121	#N/A	#N/A	#N/A	#N/A	#N/A	#N/A
Ptpa	FBgn0016698	0.358917	0.373633	0.344201	0.173673	0.0791305	0.150788	-0.16617	-0.162135	-0.170205	0.237627	0.625166	0.631193
Reg-2	FBgn0016715	0.358576	0.481017	0.236136	0.00341363	0.056304	0.162005	0.220044	0.249225	0.190863	0.40475	0.472865	0.679609
CG9008	FBgn0028540	0.358195	0.399027	0.317363	0.0368415	0.0989309	0.193533	0.244554	0.220114	0.268994	-0.181029	-0.103211	-0.0847072
CG7686	FBgn0027525	0.357417	0.369553	0.34528	0.116953	0.0612032	0.0471042	-0.0622327	-0.140234	0.0157687	#DIV/0!	#DIV/0!	#DIV/0!
mRpL40	FBgn0037892	0.357343	0.4003	0.314386	-0.0903565	-0.0532514	0.0138553	0.714164	0.427065	1.00126	-1.25531	-0.711718	-0.684775
CG7834	FBgn0039697	0.357282	0.27833	0.436234	-0.0694867	0.0158785	0.0220124	-0.25786	-0.357991	-0.157729	-0.16434	0.0102821	0.149434
CG15653	FBgn0034578	0.356545	0.356457	0.356632	0.204789	0.031052	0.0260126	0.763104	0.776154	0.750055	0.147661	0.195336	0.242364
sesB	FBgn0003360	0.355755	-0.0541004	0.76561	-0.280379	-0.173113	-0.300559	0.115206	0.147756	0.0826559	0.0199847	-0.164169	-0.3036
CG10621	FBgn0032726	0.355345	0.179736	0.530953	-0.195301	0.0270416	0.084794	0.277959	0.0926233	0.463294	#DIV/0!	#DIV/0!	#DIV/0!
Arc42	FBgn0038742	0.355235	0.397873	0.312596	0.0190221	0.0727672	0.178509	0.137768	0.196753	0.078784	-0.0802444	0.0721929	0.2203
AQP	FBgn0033807	0.35483	0.368219	0.34144	-0.0871243	-0.189557	-0.219053	0.378863	0.321015	0.436711	0.195679	0.0688188	-0.310337
TM4SF	FBgn0020372	0.354774	0.274377	0.435172	-0.479499	-0.384003	-0.422746	0.0664156	-0.0563126	0.189144	-0.502371	-0.197331	-0.802705
CG6435	FBgn0034165	0.354345	0.34791	0.36078	-0.0079043	0.037561	0.0678822	-0.138159	-0.17228	-0.104038	#DIV/0!	#DIV/0!	#DIV/0!
CG13428	FBgn0034515	0.354334	0.265409	0.443259	-0.111688	-0.0080417	-0.00863942	#N/A	#N/A	#N/A	#N/A	#N/A	#N/A
CG8147	FBgn0043791	0.354305	0.192563	0.516047	0.428895	0.221898	0.163943	#N/A	#N/A	#N/A	#N/A	#N/A	#N/A
Tsp42Ej	FBgn0033132	0.353578	0.186948	0.520207	-0.297937	-0.214088	-0.298059	#DIV/0!	#DIV/0!	#DIV/0!	#DIV/0!	#DIV/0!	#DIV/0!
CG4603	FBgn0035593	0.353559	0.388846	0.318271	0.090825	0.0798683	0.0896186	-0.127051	-0.130064	-0.124038	-0.195276	-0.0470992	-0.0336936
Rpt6R	FBgn0039788	0.353371	0.0461966	0.660546	-0.243456	-0.054077	-1.60921	#N/A	#N/A	#N/A	#N/A	#N/A	#N/A
CG34150	FBgn0083986	0.353349	0.379811	0.326887	-0.106738	0.0373566	0.121907	0.0590797	0.230819	-0.11266	-0.0714457	0.305718	0.477668
Ntmt	FBgn0033457	0.353212	0.247627	0.458798	0.183686	0.021514	0.0248177	0.00845902	0.0462153	-0.0292973	#DIV/0!	#DIV/0!	#DIV/0!
CG33170	FBgn0053170	0.353078	0.243702	0.462455	-0.196502	-0.212021	-0.217288	-0.202583	0.164303	-0.569469	-0.636164	-0.17936	0.200458
CG30440	FBgn0050440	0.351871	0.572326	0.131416	0.0101303	-0.138449	-0.0575386	#N/A	#N/A	#N/A	#N/A	#N/A	#N/A
CG6852	FBgn0036820	0.351868	0.348408	0.355328	-0.0205652	-0.0439247	-0.0502085	0.236936	0.246457	0.227416	0.106253	0.0525194	0.118337
CG6693	FBgn0037878	0.351555	0.380065	0.323044	0.0424455	-0.0381396	-0.0742064	-0.183691	-0.0425313	-0.324851	#DIV/0!	#DIV/0!	#DIV/0!
CG16986	FBgn0035356	0.351464	0.411289	0.291639	-0.218597	0.00418955	0.0429321	0.174696	0.227992	0.1214	-0.125922	0.297313	0.450281
Obp57c	FBgn0034509	0.351374	0.36739	0.335358	0.0352678	0.0148911	0.0416136	0.192243	0.282763	0.101722	0.151625	0.162055	0.180671
CG17167	FBgn0039941	0.350976	0.485333	0.21662	-0.196593	-0.20726	-0.0451978	#N/A	#N/A	#N/A	#N/A	#N/A	#N/A
List	FBgn0034381	0.350728	0.511336	0.19012	-0.12306	0.0648882	0.00268037	0.148351	0.360713	-0.0640107	#DIV/0!	#DIV/0!	#DIV/0!
CG30438	FBgn0050438	0.350399	-0.54553	1.24633	-0.258621	-0.015924	-0.61154	#N/A	#N/A	#N/A	#N/A	#N/A	#N/A
Rpi	FBgn0050410	0.350196	0.511622	0.18877	-0.155138	-0.0138199	0.0860969	-0.421835	-0.389499	-0.45417	-0.347312	-0.30709	-0.0613149
eIF4G2	FBgn0260634	0.349947	0.113722	0.586173	0.0220877	-0.0645114	-0.365271	-0.12333	-0.129471	-0.117189	#DIV/0!	#DIV/0!	#DIV/0!
Arr1	FBgn0000120	0.34948	-0.0545237	0.753483	0.137305	0.031834	0.0195869	-0.212325	-0.229222	-0.195427	#DIV/0!	#DIV/0!	#DIV/0!
CG31345	FBgn0051345	0.348906	0.325796	0.372016	-0.42848	-0.313322	-0.318401	0.132524	0.140863	0.124185	0.0898431	0.219866	0.299034
Marf	FBgn0029870	0.348679	0.339312	0.358046	-0.00597316	0.00972526	-0.0284587	-0.0861978	-0.135849	-0.0365465	-0.0207717	-0.127537	-0.267926
CG42866	FBgn0262140	0.348567	0.0318517	0.665282	1.09268	0.533438	-0.487465	#N/A	#N/A	#N/A	#N/A	#N/A	#N/A
CR43240	FBgn0262885	0.348195	0.624892	0.0714971	0.681329	-0.692565	1.58315	#N/A	#N/A	#N/A	#N/A	#N/A	#N/A
mRpL45	FBgn0263863	0.348179	0.506257	0.190101	-0.0955182	-0.125112	-0.110539	0.782958	0.518978	1.04694	#DIV/0!	#DIV/0!	#DIV/0!
geminin	FBgn0033081	0.348149	0.353123	0.343175	0.0968112	0.0456529	0.0175748	#N/A	#N/A	#N/A	#N/A	#N/A	#N/A
mRpS6	FBgn0035534	0.348112	0.425406	0.270817	0.0747115	-0.0307567	0.0635322	0.459829	0.302278	0.617379	-0.466723	-0.342249	-0.17172
Ucrh	FBgn0260008	0.348072	0.279919	0.416224	-0.279134	-0.194659	-0.179175	0.0349025	-0.0253233	0.0951282	-0.0132798	0.106378	-0.00652189
CG5273	FBgn0040382	0.348036	0.483046	0.213025	0.0979266	0.0237089	0.0162187	#N/A	#N/A	#N/A	#N/A	#N/A	#N/A
CG31676	FBgn0051676	0.347821	0.459917	0.235725	0.00796769	-0.0198918	0.0159298	0.542042	0.674953	0.409131	0.296894	0.304243	0.0748634
CG33169	FBgn0053169	0.347734	0.255422	0.440046	-0.0779205	-0.122738	-0.0926204	#N/A	#N/A	#N/A	#N/A	#N/A	#N/A
CG7946	FBgn0039743	0.346598	0.252579	0.440618	0.0795578	0.00670229	0.100251	0.0485909	-0.0099366	0.107118	0.178712	0.293452	0.232265
ninaE	FBgn0002940	0.346423	-0.129342	0.822187	0.167808	0.181367	0.146006	#N/A	#N/A	#N/A	#N/A	#N/A	#N/A
dj-1beta	FBgn0039802	0.34602	0.338587	0.353453	-0.0830553	-0.0327165	-0.0340859	0.00497057	-0.0430099	0.052951	0.190891	0.202544	0.224868
CG5011	FBgn0040723	0.346008	0.0785371	0.61348	-0.379816	0.0992803	0.0421029	#N/A	#N/A	#N/A	#N/A	#N/A	#N/A
pdm3	FBgn0261588	0.346002	0.318754	0.373249	-0.115942	-0.0455976	-0.0328648	#N/A	#N/A	#N/A	#N/A	#N/A	#N/A
CG9090	FBgn0034497	0.345086	0.141766	0.548407	-0.473927	-0.287922	-0.390511	0.0579313	0.0792706	0.0365919	0.208893	-0.103558	-0.381721
CG14644	FBgn0250821	0.345067	0.0563015	0.633833	0.0593925	-0.147748	-1.42413	#N/A	#N/A	#N/A	#N/A	#N/A	#N/A
CG6000	FBgn0039145	0.344822	0.448557	0.241086	-0.315791	-0.109022	-0.065477	0.0954284	0.167565	0.0232916	-0.34247	-0.238815	-0.13795
mRpS28	FBgn0034361	0.343208	0.425168	0.261248	0.00438401	-0.0443331	0.0191656	0.223254	0.0876132	0.358896	-0.663582	-0.215535	-0.0139331
spag	FBgn0015544	0.342992	0.381109	0.304874	0.29099	0.0171309	-7.18073e-05	0.312551	0.385441	0.23966	-0.373085	-0.208657	-0.111021
tst	FBgn0039117	0.34279	0.446539	0.23904	0.184216	-0.00334258	0.262135	0.515972	0.438906	0.593039	-0.118909	0.121438	0.0690086
l(2)34Fc	FBgn0261534	0.342707	0.322738	0.362676	-0.165707	-0.0814986	-0.0595973	0.535098	0.544993	0.525202	-0.497081	-0.30283	-0.0176808
Cyp6d4	FBgn0039006	0.342674	0.426852	0.258495	0.0330293	0.00175062	0.0915255	0.310696	0.0125857	0.608807	#DIV/0!	#DIV/0!	#DIV/0!
Ugt36Bc	FBgn0040260	0.342672	0.44401	0.241334	-0.100227	-0.0235421	-0.0585666	-0.357277	-0.351174	-0.36338	0.106113	0.0125964	-0.0916765
tacc	FBgn0026620	0.342476	0.0725208	0.612432	-0.0245087	-0.0966608	-0.201946	0.00862826	0.030234	-0.0129775	0.23646	0.25673	0.244352
CG31373	FBgn0051373	0.3422	0.253662	0.430738	-0.265496	0.0713521	0.00759165	0.0466025	-0.0388002	0.132005	-0.245048	0.257159	0.950802
CG30152	FBgn0034543	0.341685	0.239656	0.443715	-0.140799	-0.108844	-0.0806218	0.0652234	0.0709002	0.0595465	-0.155153	0.00787703	0.0522888
Ripalpha	FBgn0032189	0.341499	0.236264	0.446734	-0.0153104	-0.0486349	-0.0357381	0.210541	0.0534196	0.367662	#DIV/0!	#DIV/0!	#DIV/0!
Ttc19	FBgn0032744	0.341377	0.263792	0.418963	-0.134871	0.045117	0.0562819	-0.0150238	-0.0742524	0.0442048	0.203691	0.257027	0.185557
Sod2	FBgn0010213	0.341334	0.348185	0.334484	-0.109529	-0.0258062	-0.006341	-0.00137888	0.0660822	-0.0688399	-0.0879191	0.048395	0.0116803
CG5778	FBgn0038930	0.341252	0.449382	0.233121	0.169458	0.0465549	0.0938211	#N/A	#N/A	#N/A	#N/A	#N/A	#N/A
CG2061	FBgn0027498	0.341132	0.24345	0.438813	0.119859	0.142041	0.00172835	0.0808676	0.07307	0.0886651	#DIV/0!	#DIV/0!	#DIV/0!
Cyp12e1	FBgn0037817	0.340647	0.42771	0.253584	-0.000548319	0.00584161	0.0627537	0.29888	0.409845	0.187915	0.163159	0.467515	0.154706
CG10089	FBgn0036369	0.340496	0.167832	0.513159	-0.151166	-0.185769	-0.50111	-0.10553	-0.0954511	-0.11561	#DIV/0!	#DIV/0!	#DIV/0!
TpnC47D	FBgn0010423	0.340229	0.439577	0.240882	-0.259268	-0.288708	-0.134866	-0.12197	-0.198426	-0.0455136	-0.106494	0.133518	0.124101
Tim8	FBgn0027359	0.339909	0.354524	0.325293	-0.146528	-0.100138	-0.14957	-0.126188	-0.0943301	-0.158047	-0.177584	-0.256954	-0.23518
CG18869	FBgn0042179	0.33959	0.113854	0.565325	-0.583531	0.105833	-0.312543	0.560738	0.706439	0.415036	#DIV/0!	#DIV/0!	#DIV/0!
CG32444	FBgn0043783	0.339563	0.268944	0.410183	-0.202951	0.0724329	0.117397	0.594632	0.668314	0.52095	-0.371611	-0.225577	0.516485
CG4587	FBgn0028863	0.339487	0.314501	0.364472	-0.0446626	-0.0654514	-0.0535549	0.102751	0.0185485	0.186953	-0.111616	0.274297	-0.0617629
Lrt	FBgn0034540	0.338949	0.533553	0.144344	0.271364	0.0322204	0.151371	0.0947168	0.205335	-0.0159017	#DIV/0!	#DIV/0!	#DIV/0!
fusl	FBgn0031702	0.338899	0.205739	0.472059	-0.184125	0.0226471	0.0227992	#N/A	#N/A	#N/A	#N/A	#N/A	#N/A
Dif	FBgn0011274	0.338269	0.377918	0.29862	0.0164075	0.00758224	0.0179814	0.165691	0.0590696	0.272313	-0.323066	-0.0542264	-0.520684
Jupiter	FBgn0051363	0.338198	0.244139	0.432256	-0.00376951	-0.052385	-0.120208	0.0873732	0.0808458	0.0939006	0.267292	0.214847	0.224774
CG7110	FBgn0032521	0.337571	0.356551	0.318592	0.283342	0.166584	0.243722	#N/A	#N/A	#N/A	#N/A	#N/A	#N/A
RhoGAP5A	FBgn0029778	0.337043	0.468702	0.205385	0.0576073	-0.0478407	0.112117	#N/A	#N/A	#N/A	#N/A	#N/A	#N/A
CG31200	FBgn0051200	0.336708	0.319524	0.353893	0.0500617	0.031578	0.0220006	-0.0309818	0.0976346	-0.159598	0.174784	0.387703	0.596505
CG32112	FBgn0052112	0.336392	0.309587	0.363198	-0.22603	-0.0787879	-0.100924	-0.133159	-0.254094	-0.0122237	#DIV/0!	#DIV/0!	#DIV/0!
Cyp4d21	FBgn0031925	0.335651	0.474647	0.196655	-0.288323	0.0301911	0.0514981	2.01571	1.88515	2.14628	0.351733	-0.222348	-0.807664
CG40006	FBgn0058006	0.335006	0.420171	0.249841	-0.224929	-0.0934824	-0.0018358	0.898799	0.802316	0.995282	-0.367277	-0.402431	-0.756993
CG8680	FBgn0031684	0.334935	0.323939	0.34593	-0.1598	-0.0845796	-0.0679062	0.070604	0.139707	0.00150097	-0.250927	-0.0987198	0.0848601
Pdsw	FBgn0021967	0.334832	0.23795	0.431714	-0.187231	-0.105628	-0.106798	0.103548	0.184821	0.0222745	-0.162553	-0.192133	-0.207463
ASPP	FBgn0034606	0.334429	0.365409	0.303448	-0.0281747	0.0400213	0.0968262	#N/A	#N/A	#N/A	#N/A	#N/A	#N/A
CG3409	FBgn0033095	0.333096	0.206672	0.459519	-0.335515	-0.292305	-0.370877	0.168843	0.157628	0.180058	#DIV/0!	#DIV/0!	#DIV/0!
CG42714	FBgn0261631	0.332874	0.382323	0.283425	-0.352167	-0.0416929	0.112525	#N/A	#N/A	#N/A	#N/A	#N/A	#N/A
CG10672	FBgn0035588	0.332803	0.445585	0.220021	-0.0518592	0.0462437	0.115439	0.232818	0.382706	0.0829306	0.292593	0.0993276	0.085724
CG4729	FBgn0036623	0.332787	0.412836	0.252738	0.00846706	-0.00652991	0.0375186	0.142594	0.157724	0.127464	0.0940003	-0.0300215	-0.23841
CG5705	FBgn0032486	0.332722	0.515887	0.149558	-0.0204122	-0.0588843	0.137046	-0.120183	-0.0301779	-0.210188	-0.0618365	-0.256063	-0.0760943
alpha-Est3	FBgn0015571	0.332159	0.308051	0.356267	-0.0762851	-0.0502124	-0.0965061	-0.0324268	0.0283047	-0.0931583	-0.00407839	0.089396	0.313998
Ssadh	FBgn0039349	0.331851	0.375078	0.288624	-0.0372744	0.05006	0.0555112	0.0806537	0.0741081	0.0871992	0.0980645	0.367917	0.335462
CG17324	FBgn0027074	0.331739	0.557913	0.105566	0.33584	0.0500642	0.23228	0.75012	0.88046	0.61978	#DIV/0!	#DIV/0!	#DIV/0!
CG7407	FBgn0037134	0.331662	0.406502	0.256823	-0.0223505	-0.056343	-0.0314461	#N/A	#N/A	#N/A	#N/A	#N/A	#N/A
mRpL16	FBgn0023519	0.331451	0.362425	0.300478	0.0302709	0.0911817	0.166783	0.648086	0.374709	0.921462	#DIV/0!	#DIV/0!	#DIV/0!
CG2790	FBgn0027599	0.331156	0.370453	0.291858	0.0549976	-0.0856694	-0.0611898	0.0099355	-0.00480395	0.024675	#DIV/0!	#DIV/0!	#DIV/0!
Men	FBgn0002719	0.331066	0.263032	0.3991	0.0875903	0.0651339	0.0392047	0.054864	0.157087	-0.0473587	0.109328	0.114165	0.335438
KrT95D	FBgn0020647	0.330043	0.31737	0.342717	-0.117145	-0.146009	-0.222359	0.0616688	0.0385159	0.0848218	-0.100206	0.237036	0.108436
ND75	FBgn0017566	0.329912	0.206298	0.453525	-0.120456	-0.0227537	-0.063164	0.14768	0.202666	0.0926946	-0.133701	-0.0454001	0.0699602
CG15247	FBgn0030156	0.329742	0.368203	0.291281	-0.0959711	-0.0822626	-0.089414	#N/A	#N/A	#N/A	#N/A	#N/A	#N/A
tRNA:M2:83F	FBgn0011919	0.32973	0.708609	-0.0491489	0.278728	-0.797717	0.840397	#N/A	#N/A	#N/A	#N/A	#N/A	#N/A
SmG	FBgn0261791	0.329537	0.378469	0.280606	0.119409	0.0539348	0.129326	-0.0113194	-0.0525574	0.0299186	-0.0494689	0.0804809	0.145051
alpha-Est2	FBgn0015570	0.329048	0.344259	0.313837	-0.112004	0.030623	0.115767	0.217053	0.298084	0.136022	#DIV/0!	#DIV/0!	#DIV/0!
CG3446	FBgn0029868	0.328692	0.309042	0.348341	-0.168928	-0.0836475	-0.0868783	0.207002	0.251144	0.16286	-0.293033	-0.186712	-0.291516
Arp11	FBgn0031050	0.328471	0.490279	0.166663	0.116809	0.0387357	0.045294	-0.0040954	0.0383962	-0.046587	0.312209	0.332929	0.224439
CG9519	FBgn0030589	0.327985	0.573517	0.0824528	0.0210406	0.113767	0.18728	0.409742	0.508126	0.311357	0.550138	0.365812	0.0677161
St3	FBgn0034888	0.327646	-0.0644198	0.719713	0.0292301	0.176789	0.144554	#N/A	#N/A	#N/A	#N/A	#N/A	#N/A
ntc	FBgn0035461	0.32763	0.279036	0.376224	0.261552	0.0379486	-0.0589701	0.124598	0.0709506	0.178246	#DIV/0!	#DIV/0!	#DIV/0!
CG7194	FBgn0035868	0.327516	0.558706	0.0963257	0.54478	0.127936	0.449422	0.935748	0.926981	0.944514	#DIV/0!	#DIV/0!	#DIV/0!
CG18577	FBgn0037870	0.327193	0.712761	-0.0583758	-0.469088	-0.000385566	0.128314	#N/A	#N/A	#N/A	#N/A	#N/A	#N/A
Ncc69	FBgn0036279	0.326715	0.360554	0.292877	0.0234818	0.037844	0.0473923	0.685577	0.631121	0.740034	0.215288	0.194243	-0.241674
[truncated: 8,241 more rows]
