# Supplementary material for: Circadian gene variants and the skeletal muscle circadian clock contribute to the evolutionary divergence in longevity across Drosophila populations
Source: HighWire-hosted journal article supplement (doi:10.1101/gr.246884.118), 2019-06-27
Supplement: Supplemental_Table_S5.xlsx [file Supplemental_Table_S5.xlsx]

## Sheet: Legend
Supplemental Table S5
Genomic variants associated with genes that are part of the core circadian machinery.

## Sheet: tim
Category	missense substitution score	Chromosome	Position	Ref	Allele	Gene_Within	Protein	Gene_Nearest	To_TSS	To_TES	B3 Freq	O1 Freq	O3 Freq	B-O freq	p_B3O1	p_B3O3	p_O1O3	gene	O ave	p-value(B3W1 vs. O1W1)	B3-O1 1WK ratio	p-value(B3W1 vs. O3W1)	B3-O3 1WK ratio	1WKB3-1	1WKB3-2	1WKB3-3	6WKB3-1	6WKB3-2	6WKB3-3	1WKO1-1	1WKO1-2	1WKO1-3	6WKO1-1	6WKO1-2	6WKO1-3	1WKO3-1	1WKO3-2	1WKO3-3	6WKO3-1	6WKO3-2	6WKO3-3
UTR		2L	3498035	G	T	FBgn0014396					0.34881	1	1	1	0.000334853	0.000334502	0.601811	tim	1.31489	1.69e-06	1.5755	8.68e-05	1.05427	5.56945	5.16883	4.84494	5.95483	5.57121	5.38887	6.82486	6.80495	6.67991	7.06144	6.87673	6.88889	6.31388	5.97365	6.4585	6.70865	6.84293	6.81419
UTR		2L	3498149	A	C	FBgn0014396					0.313063	0.962963	0.81825	0.890607	0.00208492	0.0186817	0.252188	tim	1.31489	1.69e-06	1.5755	8.68e-05	1.05427	5.56945	5.16883	4.84494	5.95483	5.57121	5.38887	6.82486	6.80495	6.67991	7.06144	6.87673	6.88889	6.31388	5.97365	6.4585	6.70865	6.84293	6.81419
UTR		2L	3507777	A	T	FBgn0014396					0.343943	0.97619	0.764233	0.870212	0.000406485	0.0231423	0.118577	tim	1.31489	1.69e-06	1.5755	8.68e-05	1.05427	5.56945	5.16883	4.84494	5.95483	5.57121	5.38887	6.82486	6.80495	6.67991	7.06144	6.87673	6.88889	6.31388	5.97365	6.4585	6.70865	6.84293	6.81419
UTR		2L	3496522	A	T	FBgn0014396					0	0.57446	0.796297	0.685378	0.0461339	0.00627646	0.427814	tim	1.31489	1.69e-06	1.5755	8.68e-05	1.05427	5.56945	5.16883	4.84494	5.95483	5.57121	5.38887	6.82486	6.80495	6.67991	7.06144	6.87673	6.88889	6.31388	5.97365	6.4585	6.70865	6.84293	6.81419
UTR		2L	3497855	G	T	FBgn0014396					0	0.439393	0.788407	0.6139	0.0484085	0.00329274	0.156653	tim	1.31489	1.69e-06	1.5755	8.68e-05	1.05427	5.56945	5.16883	4.84494	5.95483	5.57121	5.38887	6.82486	6.80495	6.67991	7.06144	6.87673	6.88889	6.31388	5.97365	6.4585	6.70865	6.84293	6.81419
UTR		2L	3498224	A	C	FBgn0014396					0	0.506833	0.65257	0.579702	0.0329864	0.0107476	0.53529	tim	1.31489	1.69e-06	1.5755	8.68e-05	1.05427	5.56945	5.16883	4.84494	5.95483	5.57121	5.38887	6.82486	6.80495	6.67991	7.06144	6.87673	6.88889	6.31388	5.97365	6.4585	6.70865	6.84293	6.81419
UTR		2L	3496456	G	A	FBgn0014396					0	0.405557	0.739393	0.572475	0.0066332	0.00371799	0.0826023	tim	1.31489	1.69e-06	1.5755	8.68e-05	1.05427	5.56945	5.16883	4.84494	5.95483	5.57121	5.38887	6.82486	6.80495	6.67991	7.06144	6.87673	6.88889	6.31388	5.97365	6.4585	6.70865	6.84293	6.81419
UTR		2L	3496778	T	A	FBgn0014396					0	0.43233	0.489167	0.460748	0.0160679	0.00776856	0.717684	tim	1.31489	1.69e-06	1.5755	8.68e-05	1.05427	5.56945	5.16883	4.84494	5.95483	5.57121	5.38887	6.82486	6.80495	6.67991	7.06144	6.87673	6.88889	6.31388	5.97365	6.4585	6.70865	6.84293	6.81419
UTR		2L	3494782	AA	CT	FBgn0014396					0	0.43954	0.46389	0.451715	0.0497387	0.00693113	0.899422	tim	1.31489	1.69e-06	1.5755	8.68e-05	1.05427	5.56945	5.16883	4.84494	5.95483	5.57121	5.38887	6.82486	6.80495	6.67991	7.06144	6.87673	6.88889	6.31388	5.97365	6.4585	6.70865	6.84293	6.81419
UTR		2L	3501310	A	G	FBgn0014396					0	0.516203	0.367303	0.441753	0.0183442	0.00292221	0.363834	tim	1.31489	1.69e-06	1.5755	8.68e-05	1.05427	5.56945	5.16883	4.84494	5.95483	5.57121	5.38887	6.82486	6.80495	6.67991	7.06144	6.87673	6.88889	6.31388	5.97365	6.4585	6.70865	6.84293	6.81419
UTR		2L	3506370	C	A	FBgn0014396					0	0.430457	0.330863	0.38066	0.0466677	0.0321321	0.615883	tim	1.31489	1.69e-06	1.5755	8.68e-05	1.05427	5.56945	5.16883	4.84494	5.95483	5.57121	5.38887	6.82486	6.80495	6.67991	7.06144	6.87673	6.88889	6.31388	5.97365	6.4585	6.70865	6.84293	6.81419
UTR		2L	3496456	-	AT	FBgn0014396					0	0.21111	0.451517	0.331313	0.0446802	0.0174484	0.153696	tim	1.31489	1.69e-06	1.5755	8.68e-05	1.05427	5.56945	5.16883	4.84494	5.95483	5.57121	5.38887	6.82486	6.80495	6.67991	7.06144	6.87673	6.88889	6.31388	5.97365	6.4585	6.70865	6.84293	6.81419
UTR		2L	3502164	G	C	FBgn0014396					1	0.207385	0.27355	0.240468	0.000250884	0.00267197	0.772104	tim	1.31489	1.69e-06	1.5755	8.68e-05	1.05427	5.56945	5.16883	4.84494	5.95483	5.57121	5.38887	6.82486	6.80495	6.67991	7.06144	6.87673	6.88889	6.31388	5.97365	6.4585	6.70865	6.84293	6.81419
UTR		2L	3496879	A	C	FBgn0014396					0.63818	0	0.36364	0.18182	0.000109904	0.0157261	0.374457	tim	1.31489	1.69e-06	1.5755	8.68e-05	1.05427	5.56945	5.16883	4.84494	5.95483	5.57121	5.38887	6.82486	6.80495	6.67991	7.06144	6.87673	6.88889	6.31388	5.97365	6.4585	6.70865	6.84293	6.81419
UTR		2L	3496836	A	G	FBgn0014396					0.683907	0	0.176365	0.0881825	0.000889731	0.00714618	0.220583	tim	1.31489	1.69e-06	1.5755	8.68e-05	1.05427	5.56945	5.16883	4.84494	5.95483	5.57121	5.38887	6.82486	6.80495	6.67991	7.06144	6.87673	6.88889	6.31388	5.97365	6.4585	6.70865	6.84293	6.81419
UTR		2L	3496786	G	C	FBgn0014396					0.4226	0	0	0	0.00282616	0.00282237	0.39337	tim	1.31489	1.69e-06	1.5755	8.68e-05	1.05427	5.56945	5.16883	4.84494	5.95483	5.57121	5.38887	6.82486	6.80495	6.67991	7.06144	6.87673	6.88889	6.31388	5.97365	6.4585	6.70865	6.84293	6.81419
UTR		2L	3497283	C	T	FBgn0014396					0.501483	0	0	0	0.0485604	0.0485392	0.802352	tim	1.31489	1.69e-06	1.5755	8.68e-05	1.05427	5.56945	5.16883	4.84494	5.95483	5.57121	5.38887	6.82486	6.80495	6.67991	7.06144	6.87673	6.88889	6.31388	5.97365	6.4585	6.70865	6.84293	6.81419
UTR		2L	3498332	G	T	FBgn0014396					0.50236	0	0	0	0.0109155	0.0108816	0.166192	tim	1.31489	1.69e-06	1.5755	8.68e-05	1.05427	5.56945	5.16883	4.84494	5.95483	5.57121	5.38887	6.82486	6.80495	6.67991	7.06144	6.87673	6.88889	6.31388	5.97365	6.4585	6.70865	6.84293	6.81419
UTR		2L	3496665	-	AA	FBgn0014396					0.51315	0	0	0	0.00052726	0.000525596	0.202227	tim	1.31489	1.69e-06	1.5755	8.68e-05	1.05427	5.56945	5.16883	4.84494	5.95483	5.57121	5.38887	6.82486	6.80495	6.67991	7.06144	6.87673	6.88889	6.31388	5.97365	6.4585	6.70865	6.84293	6.81419
UTR		2L	3497371	G	A	FBgn0014396					0.564297	0	0	0	0.0051613	0.0051744	0.117752	tim	1.31489	1.69e-06	1.5755	8.68e-05	1.05427	5.56945	5.16883	4.84494	5.95483	5.57121	5.38887	6.82486	6.80495	6.67991	7.06144	6.87673	6.88889	6.31388	5.97365	6.4585	6.70865	6.84293	6.81419
UTR		2L	3497582	G	A	FBgn0014396					0.58756	0	0	0	0.00403497	0.0040358	0.823702	tim	1.31489	1.69e-06	1.5755	8.68e-05	1.05427	5.56945	5.16883	4.84494	5.95483	5.57121	5.38887	6.82486	6.80495	6.67991	7.06144	6.87673	6.88889	6.31388	5.97365	6.4585	6.70865	6.84293	6.81419
UTR		2L	3498439	C	A	FBgn0014396					0.588003	0	0	0	0.000577468	0.000576523	0.275063	tim	1.31489	1.69e-06	1.5755	8.68e-05	1.05427	5.56945	5.16883	4.84494	5.95483	5.57121	5.38887	6.82486	6.80495	6.67991	7.06144	6.87673	6.88889	6.31388	5.97365	6.4585	6.70865	6.84293	6.81419
UTR		2L	3498298	C	T	FBgn0014396					0.600743	0	0	0	0.0227086	0.0227119	0.929439	tim	1.31489	1.69e-06	1.5755	8.68e-05	1.05427	5.56945	5.16883	4.84494	5.95483	5.57121	5.38887	6.82486	6.80495	6.67991	7.06144	6.87673	6.88889	6.31388	5.97365	6.4585	6.70865	6.84293	6.81419
UTR		2L	3498294	A	G	FBgn0014396					0.60376	0	0	0	0.0181548	0.018169	0.404732	tim	1.31489	1.69e-06	1.5755	8.68e-05	1.05427	5.56945	5.16883	4.84494	5.95483	5.57121	5.38887	6.82486	6.80495	6.67991	7.06144	6.87673	6.88889	6.31388	5.97365	6.4585	6.70865	6.84293	6.81419
UTR		2L	3497574	T	C	FBgn0014396					0.60387	0	0	0	0.00318912	0.00318594	0.499108	tim	1.31489	1.69e-06	1.5755	8.68e-05	1.05427	5.56945	5.16883	4.84494	5.95483	5.57121	5.38887	6.82486	6.80495	6.67991	7.06144	6.87673	6.88889	6.31388	5.97365	6.4585	6.70865	6.84293	6.81419
UTR		2L	3498124	T	G	FBgn0014396					0.60551	0	0	0	0.00172968	0.00173074	0.709863	tim	1.31489	1.69e-06	1.5755	8.68e-05	1.05427	5.56945	5.16883	4.84494	5.95483	5.57121	5.38887	6.82486	6.80495	6.67991	7.06144	6.87673	6.88889	6.31388	5.97365	6.4585	6.70865	6.84293	6.81419
UTR		2L	3497579	G	C	FBgn0014396					0.608817	0	0	0	0.00412536	0.00412562	0.975241	tim	1.31489	1.69e-06	1.5755	8.68e-05	1.05427	5.56945	5.16883	4.84494	5.95483	5.57121	5.38887	6.82486	6.80495	6.67991	7.06144	6.87673	6.88889	6.31388	5.97365	6.4585	6.70865	6.84293	6.81419
UTR		2L	3497569	G	T	FBgn0014396					0.610477	0	0	0	0.00141142	0.00140966	0.556626	tim	1.31489	1.69e-06	1.5755	8.68e-05	1.05427	5.56945	5.16883	4.84494	5.95483	5.57121	5.38887	6.82486	6.80495	6.67991	7.06144	6.87673	6.88889	6.31388	5.97365	6.4585	6.70865	6.84293	6.81419
UTR		2L	3498205	A	G	FBgn0014396					0.651403	0	0	0	0.00532255	0.00533068	0.247933	tim	1.31489	1.69e-06	1.5755	8.68e-05	1.05427	5.56945	5.16883	4.84494	5.95483	5.57121	5.38887	6.82486	6.80495	6.67991	7.06144	6.87673	6.88889	6.31388	5.97365	6.4585	6.70865	6.84293	6.81419
UTR		2L	3498144	A	C	FBgn0014396					0.657777	0	0	0	0.00112758	0.00112631	0.55752	tim	1.31489	1.69e-06	1.5755	8.68e-05	1.05427	5.56945	5.16883	4.84494	5.95483	5.57121	5.38887	6.82486	6.80495	6.67991	7.06144	6.87673	6.88889	6.31388	5.97365	6.4585	6.70865	6.84293	6.81419
UTR		2L	3498158	C	A	FBgn0014396					0.68038	0	0	0	0.00183321	0.00183164	0.516641	tim	1.31489	1.69e-06	1.5755	8.68e-05	1.05427	5.56945	5.16883	4.84494	5.95483	5.57121	5.38887	6.82486	6.80495	6.67991	7.06144	6.87673	6.88889	6.31388	5.97365	6.4585	6.70865	6.84293	6.81419
UTR		2L	3498149	AG	CT	FBgn0014396					0.686937	0	0	0	0.00120557	0.00120391	0.424716	tim	1.31489	1.69e-06	1.5755	8.68e-05	1.05427	5.56945	5.16883	4.84494	5.95483	5.57121	5.38887	6.82486	6.80495	6.67991	7.06144	6.87673	6.88889	6.31388	5.97365	6.4585	6.70865	6.84293	6.81419

## Sheet: per
Category	missense substitution score	Chromosome	Position	Ref	Allele	Gene_Within	Protein	Gene_Nearest	To_TSS	To_TES	B3 Freq	O1 Freq	O3 Freq	B-O freq	p_B3O1	p_B3O3	p_O1O3	gene	O ave	p-value(B3W1 vs. O1W1)	B3-O1 1WK ratio	p-value(B3W1 vs. O3W1)	B3-O3 1WK ratio	1WKB3-1	1WKB3-2	1WKB3-3	6WKB3-1	6WKB3-2	6WKB3-3	1WKO1-1	1WKO1-2	1WKO1-3	6WKO1-1	6WKO1-2	6WKO1-3	1WKO3-1	1WKO3-2	1WKO3-3	6WKO3-1	6WKO3-2	6WKO3-3
non-coding		X	2579386	A	-			FBgn0003068	227		0.86247	0	0	0	0.000249896	0.000250087	0.621318	per	0.733983	2.63e-05	1.0042	0.0103332	0.463762	3.2052	3.10923	2.90821	3.83278	3.46331	3.39262	4.15602	4.06781	4.01142	4.415	4.251	4.23725	3.47545	3.23834	3.90013	4.12903	4.02655	4.12964
non-coding		X	2579367	A	T			FBgn0003068	246		1	0	0	0	4.95e-14	8.37e-14	0.871065	per	0.733983	2.63e-05	1.0042	0.0103332	0.463762	3.2052	3.10923	2.90821	3.83278	3.46331	3.39262	4.15602	4.06781	4.01142	4.415	4.251	4.23725	3.47545	3.23834	3.90013	4.12903	4.02655	4.12964
non-coding		X	2579325	G	A			FBgn0003068	288		1	0	0	0	1.15e-13	6.64e-14	0.702612	per	0.733983	2.63e-05	1.0042	0.0103332	0.463762	3.2052	3.10923	2.90821	3.83278	3.46331	3.39262	4.15602	4.06781	4.01142	4.415	4.251	4.23725	3.47545	3.23834	3.90013	4.12903	4.02655	4.12964
non-coding		X	2579371	G	A			FBgn0003068	242		1	0	0	0	6.05e-14	5.37e-14	0.519925	per	0.733983	2.63e-05	1.0042	0.0103332	0.463762	3.2052	3.10923	2.90821	3.83278	3.46331	3.39262	4.15602	4.06781	4.01142	4.415	4.251	4.23725	3.47545	3.23834	3.90013	4.12903	4.02655	4.12964
non-coding		X	2579382	A	C			FBgn0003068	231		1	0	0	0	2.81e-15	2.65e-15	0.0677753	per	0.733983	2.63e-05	1.0042	0.0103332	0.463762	3.2052	3.10923	2.90821	3.83278	3.46331	3.39262	4.15602	4.06781	4.01142	4.415	4.251	4.23725	3.47545	3.23834	3.90013	4.12903	4.02655	4.12964
UTR		X	2586215	T	A	FBgn0003068					1	0	0	0	2.33e-14	2.53e-14	0.73055	per	0.733983	2.63e-05	1.0042	0.0103332	0.463762	3.2052	3.10923	2.90821	3.83278	3.46331	3.39262	4.15602	4.06781	4.01142	4.415	4.251	4.23725	3.47545	3.23834	3.90013	4.12903	4.02655	4.12964
UTR		X	2585681	GG	TC	FBgn0003068					1	0	0	0	2.93e-15	6.28e-14	0.305316	per	0.733983	2.63e-05	1.0042	0.0103332	0.463762	3.2052	3.10923	2.90821	3.83278	3.46331	3.39262	4.15602	4.06781	4.01142	4.415	4.251	4.23725	3.47545	3.23834	3.90013	4.12903	4.02655	4.12964

## Sheet: clk
Category	missense substitution score	Chromosome	Position	Ref	Allele	Gene_Within	Protein	Gene_Nearest	To_TSS	To_TES	B3 Freq	O1 Freq	O3 Freq	B-O freq	p_B3O1	p_B3O3	p_O1O3	gene	O ave	p-value(B3W1 vs. O1W1)	B3-O1 1WK ratio	p-value(B3W1 vs. O3W1)	B3-O3 1WK ratio	1WKB3-1	1WKB3-2	1WKB3-3	6WKB3-1	6WKB3-2	6WKB3-3	1WKO1-1	1WKO1-2	1WKO1-3	6WKO1-1	6WKO1-2	6WKO1-3	1WKO3-1	1WKO3-2	1WKO3-3	6WKO3-1	6WKO3-2	6WKO3-3
UTR		3L	7767422	T	-	FBgn0023076					0	0.972223	1	0.986112	3.97e-06	1.93e-14	0.371981	Clk	-0.762159	0.000553808	-0.829189	0.00209483	-0.695128	3.059	3.54944	3.31971	2.76144	3.22268	3.10836	2.69267	2.17901	2.56891	2.38654	2.73346	2.43692	2.59377	2.69693	2.55207	2.7589	3.00513	2.5369
UTR		3L	7765255	T	C	FBgn0023076					0	0.955557	1	0.977778	2.78e-05	3.16e-15	0.375063	Clk	-0.762159	0.000553808	-0.829189	0.00209483	-0.695128	3.059	3.54944	3.31971	2.76144	3.22268	3.10836	2.69267	2.17901	2.56891	2.38654	2.73346	2.43692	2.59377	2.69693	2.55207	2.7589	3.00513	2.5369
UTR		3L	7764817	A	T	FBgn0023076					0	0.948717	1	0.974358	4.98e-05	2.67e-14	0.372589	Clk	-0.762159	0.000553808	-0.829189	0.00209483	-0.695128	3.059	3.54944	3.31971	2.76144	3.22268	3.10836	2.69267	2.17901	2.56891	2.38654	2.73346	2.43692	2.59377	2.69693	2.55207	2.7589	3.00513	2.5369
UTR		3L	7760576	G	T	FBgn0023076					0	0.944443	1	0.972222	7.05e-05	9.53e-15	0.369971	Clk	-0.762159	0.000553808	-0.829189	0.00209483	-0.695128	3.059	3.54944	3.31971	2.76144	3.22268	3.10836	2.69267	2.17901	2.56891	2.38654	2.73346	2.43692	2.59377	2.69693	2.55207	2.7589	3.00513	2.5369
UTR		3L	7764805	A	C	FBgn0023076					0	0.92857	1	0.964285	0.000202261	1.51e-14	0.374744	Clk	-0.762159	0.000553808	-0.829189	0.00209483	-0.695128	3.059	3.54944	3.31971	2.76144	3.22268	3.10836	2.69267	2.17901	2.56891	2.38654	2.73346	2.43692	2.59377	2.69693	2.55207	2.7589	3.00513	2.5369
UTR		3L	7764714	G	A	FBgn0023076					0	0.924243	1	0.962122	0.000257556	5.4e-14	0.37081	Clk	-0.762159	0.000553808	-0.829189	0.00209483	-0.695128	3.059	3.54944	3.31971	2.76144	3.22268	3.10836	2.69267	2.17901	2.56891	2.38654	2.73346	2.43692	2.59377	2.69693	2.55207	2.7589	3.00513	2.5369
UTR		3L	7764741	T	G	FBgn0023076					0	0.916667	1	0.958333	0.000390542	5.09e-14	0.373251	Clk	-0.762159	0.000553808	-0.829189	0.00209483	-0.695128	3.059	3.54944	3.31971	2.76144	3.22268	3.10836	2.69267	2.17901	2.56891	2.38654	2.73346	2.43692	2.59377	2.69693	2.55207	2.7589	3.00513	2.5369
UTR		3L	7764785	C	G	FBgn0023076					0	0.907407	1	0.953703	0.000608877	2.45e-14	0.373408	Clk	-0.762159	0.000553808	-0.829189	0.00209483	-0.695128	3.059	3.54944	3.31971	2.76144	3.22268	3.10836	2.69267	2.17901	2.56891	2.38654	2.73346	2.43692	2.59377	2.69693	2.55207	2.7589	3.00513	2.5369
UTR		3L	7767346	-	A	FBgn0023076					0.880893	0.92854	0.92803	0.928285	0.0333719	0.010132	0.970527	Clk	-0.762159	0.000553808	-0.829189	0.00209483	-0.695128	3.059	3.54944	3.31971	2.76144	3.22268	3.10836	2.69267	2.17901	2.56891	2.38654	2.73346	2.43692	2.59377	2.69693	2.55207	2.7589	3.00513	2.5369
UTR		3L	7767533	C	T	FBgn0023076					0	0.912697	0.937383	0.92504	4.65e-05	1.5e-05	0.709209	Clk	-0.762159	0.000553808	-0.829189	0.00209483	-0.695128	3.059	3.54944	3.31971	2.76144	3.22268	3.10836	2.69267	2.17901	2.56891	2.38654	2.73346	2.43692	2.59377	2.69693	2.55207	2.7589	3.00513	2.5369
UTR		3L	7764394	G	A	FBgn0023076					0	0.850457	0.751987	0.801222	0.000345908	0.000284918	0.373819	Clk	-0.762159	0.000553808	-0.829189	0.00209483	-0.695128	3.059	3.54944	3.31971	2.76144	3.22268	3.10836	2.69267	2.17901	2.56891	2.38654	2.73346	2.43692	2.59377	2.69693	2.55207	2.7589	3.00513	2.5369
UTR		3L	7767787	T	C	FBgn0023076					0	0.899123	0.680093	0.789608	0.00029412	0.00663979	0.222626	Clk	-0.762159	0.000553808	-0.829189	0.00209483	-0.695128	3.059	3.54944	3.31971	2.76144	3.22268	3.10836	2.69267	2.17901	2.56891	2.38654	2.73346	2.43692	2.59377	2.69693	2.55207	2.7589	3.00513	2.5369
UTR		3L	7767784	T	G	FBgn0023076					0	0.88611	0.673077	0.779593	0.000594957	0.00825208	0.265792	Clk	-0.762159	0.000553808	-0.829189	0.00209483	-0.695128	3.059	3.54944	3.31971	2.76144	3.22268	3.10836	2.69267	2.17901	2.56891	2.38654	2.73346	2.43692	2.59377	2.69693	2.55207	2.7589	3.00513	2.5369
missense	-1	3L	7760534	C	G	FBgn0023076	CG32371-RA:p.Asp280His				0	0.822223	0.72306	0.772642	0.00105563	0.00168886	0.508622	Clk	-0.762159	0.000553808	-0.829189	0.00209483	-0.695128	3.059	3.54944	3.31971	2.76144	3.22268	3.10836	2.69267	2.17901	2.56891	2.38654	2.73346	2.43692	2.59377	2.69693	2.55207	2.7589	3.00513	2.5369
UTR		3L	7767770	C	T	FBgn0023076					0	0.887627	0.63377	0.760698	0.000608886	0.00826974	0.185066	Clk	-0.762159	0.000553808	-0.829189	0.00209483	-0.695128	3.059	3.54944	3.31971	2.76144	3.22268	3.10836	2.69267	2.17901	2.56891	2.38654	2.73346	2.43692	2.59377	2.69693	2.55207	2.7589	3.00513	2.5369
UTR		3L	7768330	G	A	FBgn0023076					0	0.762963	0.729167	0.746065	0.0143595	0.00243176	0.881669	Clk	-0.762159	0.000553808	-0.829189	0.00209483	-0.695128	3.059	3.54944	3.31971	2.76144	3.22268	3.10836	2.69267	2.17901	2.56891	2.38654	2.73346	2.43692	2.59377	2.69693	2.55207	2.7589	3.00513	2.5369
UTR		3L	7768481	T	C	FBgn0023076					0	0.76984	0.64127	0.705555	0.00757232	0.00424868	0.533334	Clk	-0.762159	0.000553808	-0.829189	0.00209483	-0.695128	3.059	3.54944	3.31971	2.76144	3.22268	3.10836	2.69267	2.17901	2.56891	2.38654	2.73346	2.43692	2.59377	2.69693	2.55207	2.7589	3.00513	2.5369
UTR		3L	7763465	T	-	FBgn0023076					0	0.76229	0.619047	0.690668	0.00103636	0.00738918	0.400525	Clk	-0.762159	0.000553808	-0.829189	0.00209483	-0.695128	3.059	3.54944	3.31971	2.76144	3.22268	3.10836	2.69267	2.17901	2.56891	2.38654	2.73346	2.43692	2.59377	2.69693	2.55207	2.7589	3.00513	2.5369
UTR		3L	7768319	A	G	FBgn0023076					0	0.7	0.656707	0.678353	0.0281517	0.0143685	0.875949	Clk	-0.762159	0.000553808	-0.829189	0.00209483	-0.695128	3.059	3.54944	3.31971	2.76144	3.22268	3.10836	2.69267	2.17901	2.56891	2.38654	2.73346	2.43692	2.59377	2.69693	2.55207	2.7589	3.00513	2.5369
UTR		3L	7763619	T	G	FBgn0023076					1	0.36364	0.49654	0.43009	0.00190928	0.0019977	0.0550603	Clk	-0.762159	0.000553808	-0.829189	0.00209483	-0.695128	3.059	3.54944	3.31971	2.76144	3.22268	3.10836	2.69267	2.17901	2.56891	2.38654	2.73346	2.43692	2.59377	2.69693	2.55207	2.7589	3.00513	2.5369
UTR		3L	7760193	G	A	FBgn0023076					1	0.33088	0.44828	0.38958	0.00289326	0.00471038	0.729906	Clk	-0.762159	0.000553808	-0.829189	0.00209483	-0.695128	3.059	3.54944	3.31971	2.76144	3.22268	3.10836	2.69267	2.17901	2.56891	2.38654	2.73346	2.43692	2.59377	2.69693	2.55207	2.7589	3.00513	2.5369
UTR		3L	7760430	T	C	FBgn0023076					1	0.36184	0.34224	0.35204	0.00515219	0.00592749	0.611575	Clk	-0.762159	0.000553808	-0.829189	0.00209483	-0.695128	3.059	3.54944	3.31971	2.76144	3.22268	3.10836	2.69267	2.17901	2.56891	2.38654	2.73346	2.43692	2.59377	2.69693	2.55207	2.7589	3.00513	2.5369
UTR		3L	7760646	C	T	FBgn0023076					1	0.241665	0.373625	0.307645	0.000954062	0.00501086	0.622583	Clk	-0.762159	0.000553808	-0.829189	0.00209483	-0.695128	3.059	3.54944	3.31971	2.76144	3.22268	3.10836	2.69267	2.17901	2.56891	2.38654	2.73346	2.43692	2.59377	2.69693	2.55207	2.7589	3.00513	2.5369
UTR		3L	7760338	T	C	FBgn0023076					1	0.23077	0.372595	0.301683	0.00027665	0.00442632	0.319118	Clk	-0.762159	0.000553808	-0.829189	0.00209483	-0.695128	3.059	3.54944	3.31971	2.76144	3.22268	3.10836	2.69267	2.17901	2.56891	2.38654	2.73346	2.43692	2.59377	2.69693	2.55207	2.7589	3.00513	2.5369
UTR		3L	7760652	G	A	FBgn0023076					1	0.258335	0.287037	0.272686	0.00146619	0.00221125	0.478644	Clk	-0.762159	0.000553808	-0.829189	0.00209483	-0.695128	3.059	3.54944	3.31971	2.76144	3.22268	3.10836	2.69267	2.17901	2.56891	2.38654	2.73346	2.43692	2.59377	2.69693	2.55207	2.7589	3.00513	2.5369
UTR		3L	7760233	C	T	FBgn0023076					1	0.26316	0.254747	0.258953	0.000485357	0.00102581	0.247735	Clk	-0.762159	0.000553808	-0.829189	0.00209483	-0.695128	3.059	3.54944	3.31971	2.76144	3.22268	3.10836	2.69267	2.17901	2.56891	2.38654	2.73346	2.43692	2.59377	2.69693	2.55207	2.7589	3.00513	2.5369
UTR		3L	7760265	C	T	FBgn0023076					1	0.22727	0.287467	0.257368	0.000261166	0.00150683	0.151022	Clk	-0.762159	0.000553808	-0.829189	0.00209483	-0.695128	3.059	3.54944	3.31971	2.76144	3.22268	3.10836	2.69267	2.17901	2.56891	2.38654	2.73346	2.43692	2.59377	2.69693	2.55207	2.7589	3.00513	2.5369
UTR		3L	7765558	T	A	FBgn0023076					0.7791	0.21053	0.286325	0.248427	0.000609002	0.0136648	0.482314	Clk	-0.762159	0.000553808	-0.829189	0.00209483	-0.695128	3.059	3.54944	3.31971	2.76144	3.22268	3.10836	2.69267	2.17901	2.56891	2.38654	2.73346	2.43692	2.59377	2.69693	2.55207	2.7589	3.00513	2.5369
UTR		3L	7765556	-	CC	FBgn0023076					0.983333	0.21905	0.271795	0.245423	0.000379775	0.00530069	0.840639	Clk	-0.762159	0.000553808	-0.829189	0.00209483	-0.695128	3.059	3.54944	3.31971	2.76144	3.22268	3.10836	2.69267	2.17901	2.56891	2.38654	2.73346	2.43692	2.59377	2.69693	2.55207	2.7589	3.00513	2.5369
missense	2	3L	7760762	A	T	FBgn0023076	CG32371-RA:p.Leu204Met				1	0.170275	0.319773	0.245024	0.000202237	0.00286285	0.173748	Clk	-0.762159	0.000553808	-0.829189	0.00209483	-0.695128	3.059	3.54944	3.31971	2.76144	3.22268	3.10836	2.69267	2.17901	2.56891	2.38654	2.73346	2.43692	2.59377	2.69693	2.55207	2.7589	3.00513	2.5369
UTR		3L	7760330	T	C	FBgn0023076					1	0.18519	0.271107	0.228148	0.000108593	0.00123697	0.126734	Clk	-0.762159	0.000553808	-0.829189	0.00209483	-0.695128	3.059	3.54944	3.31971	2.76144	3.22268	3.10836	2.69267	2.17901	2.56891	2.38654	2.73346	2.43692	2.59377	2.69693	2.55207	2.7589	3.00513	2.5369
UTR		3L	7760323	T	C	FBgn0023076					1	0.18519	0.270697	0.227943	0.00010808	0.000493995	0.0893037	Clk	-0.762159	0.000553808	-0.829189	0.00209483	-0.695128	3.059	3.54944	3.31971	2.76144	3.22268	3.10836	2.69267	2.17901	2.56891	2.38654	2.73346	2.43692	2.59377	2.69693	2.55207	2.7589	3.00513	2.5369
UTR		3L	7760374	C	T	FBgn0023076					1	0.178055	0.27702	0.227538	0.000319595	0.00220814	0.285625	Clk	-0.762159	0.000553808	-0.829189	0.00209483	-0.695128	3.059	3.54944	3.31971	2.76144	3.22268	3.10836	2.69267	2.17901	2.56891	2.38654	2.73346	2.43692	2.59377	2.69693	2.55207	2.7589	3.00513	2.5369
UTR		3L	7762428	C	T	FBgn0023076					1	0	0.28571	0.142855	6.14e-14	0.000686871	0.373932	Clk	-0.762159	0.000553808	-0.829189	0.00209483	-0.695128	3.059	3.54944	3.31971	2.76144	3.22268	3.10836	2.69267	2.17901	2.56891	2.38654	2.73346	2.43692	2.59377	2.69693	2.55207	2.7589	3.00513	2.5369
UTR		3L	7765779	G	A	FBgn0023076					1	0.26667	0	0.133335	0.000510492	8.61e-14	0.373647	Clk	-0.762159	0.000553808	-0.829189	0.00209483	-0.695128	3.059	3.54944	3.31971	2.76144	3.22268	3.10836	2.69267	2.17901	2.56891	2.38654	2.73346	2.43692	2.59377	2.69693	2.55207	2.7589	3.00513	2.5369
UTR		3L	7760196	C	A	FBgn0023076					1	0.26667	0	0.133335	0.000506259	4.84e-14	0.373443	Clk	-0.762159	0.000553808	-0.829189	0.00209483	-0.695128	3.059	3.54944	3.31971	2.76144	3.22268	3.10836	2.69267	2.17901	2.56891	2.38654	2.73346	2.43692	2.59377	2.69693	2.55207	2.7589	3.00513	2.5369
UTR		3L	7764060	C	T	FBgn0023076					1	0.21429	0	0.107145	0.00020079	3.44e-15	0.373743	Clk	-0.762159	0.000553808	-0.829189	0.00209483	-0.695128	3.059	3.54944	3.31971	2.76144	3.22268	3.10836	2.69267	2.17901	2.56891	2.38654	2.73346	2.43692	2.59377	2.69693	2.55207	2.7589	3.00513	2.5369
UTR		3L	7765551	C	T	FBgn0023076					1	0.2	0	0.1	0.000150709	1.2e-15	0.376864	Clk	-0.762159	0.000553808	-0.829189	0.00209483	-0.695128	3.059	3.54944	3.31971	2.76144	3.22268	3.10836	2.69267	2.17901	2.56891	2.38654	2.73346	2.43692	2.59377	2.69693	2.55207	2.7589	3.00513	2.5369
UTR		3L	7763828	C	T	FBgn0023076					1	0.18182	0	0.09091	0.000100217	2.85e-14	0.375505	Clk	-0.762159	0.000553808	-0.829189	0.00209483	-0.695128	3.059	3.54944	3.31971	2.76144	3.22268	3.10836	2.69267	2.17901	2.56891	2.38654	2.73346	2.43692	2.59377	2.69693	2.55207	2.7589	3.00513	2.5369
UTR		3L	7762626	T	A	FBgn0023076					1	0.15	0	0.075	4.57e-05	5.62e-15	0.371499	Clk	-0.762159	0.000553808	-0.829189	0.00209483	-0.695128	3.059	3.54944	3.31971	2.76144	3.22268	3.10836	2.69267	2.17901	2.56891	2.38654	2.73346	2.43692	2.59377	2.69693	2.55207	2.7589	3.00513	2.5369
missense	-3	3L	7757449	T	A	FBgn0023076	Clk-RF:p.[Asn917Ile]; Clk-RA:p.[Asn979Ile]; Clk-RD:p.[Asn983Ile]				1	0.14286	0	0.07143	3.65e-05	1.12e-14	0.368974	Clk	-0.762159	0.000553808	-0.829189	0.00209483	-0.695128	3.059	3.54944	3.31971	2.76144	3.22268	3.10836	2.69267	2.17901	2.56891	2.38654	2.73346	2.43692	2.59377	2.69693	2.55207	2.7589	3.00513	2.5369
UTR		3L	7767178	A	T	FBgn0023076					0.985507	0.13333	0	0.066665	3.58e-05	2.93e-07	0.372922	Clk	-0.762159	0.000553808	-0.829189	0.00209483	-0.695128	3.059	3.54944	3.31971	2.76144	3.22268	3.10836	2.69267	2.17901	2.56891	2.38654	2.73346	2.43692	2.59377	2.69693	2.55207	2.7589	3.00513	2.5369
UTR		3L	7764914	-	GAATAA	FBgn0023076					0.94643	0.11765	0	0.058825	2.66e-05	3.69e-07	0.370285	Clk	-0.762159	0.000553808	-0.829189	0.00209483	-0.695128	3.059	3.54944	3.31971	2.76144	3.22268	3.10836	2.69267	2.17901	2.56891	2.38654	2.73346	2.43692	2.59377	2.69693	2.55207	2.7589	3.00513	2.5369
UTR		3L	7765060	T	C	FBgn0023076					1	0.11765	0	0.058825	1.63e-05	4.89e-14	0.374904	Clk	-0.762159	0.000553808	-0.829189	0.00209483	-0.695128	3.059	3.54944	3.31971	2.76144	3.22268	3.10836	2.69267	2.17901	2.56891	2.38654	2.73346	2.43692	2.59377	2.69693	2.55207	2.7589	3.00513	2.5369
missense	2	3L	7759813	C	A	FBgn0023076	Clk-RF:p.[Glu169Asp]; Clk-RA:p.[Glu231Asp]; Clk-RD:p.[Glu235Asp]				1	0.11111	0	0.055555	1.32e-05	8.47e-15	0.370474	Clk	-0.762159	0.000553808	-0.829189	0.00209483	-0.695128	3.059	3.54944	3.31971	2.76144	3.22268	3.10836	2.69267	2.17901	2.56891	2.38654	2.73346	2.43692	2.59377	2.69693	2.55207	2.7589	3.00513	2.5369
UTR		3L	7767172	A	-	FBgn0023076					0.914143	0.11111	0	0.055555	1.89e-05	3.29e-10	0.375502	Clk	-0.762159	0.000553808	-0.829189	0.00209483	-0.695128	3.059	3.54944	3.31971	2.76144	3.22268	3.10836	2.69267	2.17901	2.56891	2.38654	2.73346	2.43692	2.59377	2.69693	2.55207	2.7589	3.00513	2.5369
UTR		3L	7765054	C	A	FBgn0023076					1	0.11111	0	0.055555	1.27e-05	4.19e-14	0.370913	Clk	-0.762159	0.000553808	-0.829189	0.00209483	-0.695128	3.059	3.54944	3.31971	2.76144	3.22268	3.10836	2.69267	2.17901	2.56891	2.38654	2.73346	2.43692	2.59377	2.69693	2.55207	2.7589	3.00513	2.5369
UTR		3L	7765046	A	G	FBgn0023076					1	0.11111	0	0.055555	1.29e-05	3.54e-15	0.366704	Clk	-0.762159	0.000553808	-0.829189	0.00209483	-0.695128	3.059	3.54944	3.31971	2.76144	3.22268	3.10836	2.69267	2.17901	2.56891	2.38654	2.73346	2.43692	2.59377	2.69693	2.55207	2.7589	3.00513	2.5369
UTR		3L	7760760	C	T	FBgn0023076					1	0.10526	0	0.05263	1.04e-05	1.66e-14	0.374453	Clk	-0.762159	0.000553808	-0.829189	0.00209483	-0.695128	3.059	3.54944	3.31971	2.76144	3.22268	3.10836	2.69267	2.17901	2.56891	2.38654	2.73346	2.43692	2.59377	2.69693	2.55207	2.7589	3.00513	2.5369
UTR		3L	7764848	C	T	FBgn0023076					1	0.10526	0	0.05263	1.02e-05	1.82e-14	0.367657	Clk	-0.762159	0.000553808	-0.829189	0.00209483	-0.695128	3.059	3.54944	3.31971	2.76144	3.22268	3.10836	2.69267	2.17901	2.56891	2.38654	2.73346	2.43692	2.59377	2.69693	2.55207	2.7589	3.00513	2.5369
UTR		3L	7765560	T	A	FBgn0023076					0.15228	0	0.07692	0.03846	0.00820994	0.0353152	0.378428	Clk	-0.762159	0.000553808	-0.829189	0.00209483	-0.695128	3.059	3.54944	3.31971	2.76144	3.22268	3.10836	2.69267	2.17901	2.56891	2.38654	2.73346	2.43692	2.59377	2.69693	2.55207	2.7589	3.00513	2.5369
non-coding		3L	7757068	T	C			FBgn0023076		3	0.98485	0	0	0	3.49e-07	3.49e-07	0.218394	Clk	-0.762159	0.000553808	-0.829189	0.00209483	-0.695128	3.059	3.54944	3.31971	2.76144	3.22268	3.10836	2.69267	2.17901	2.56891	2.38654	2.73346	2.43692	2.59377	2.69693	2.55207	2.7589	3.00513	2.5369
UTR		3L	7763465	-	T	FBgn0023076					0.6432	0	0	0	8.06e-05	8.07e-05	0.542231	Clk	-0.762159	0.000553808	-0.829189	0.00209483	-0.695128	3.059	3.54944	3.31971	2.76144	3.22268	3.10836	2.69267	2.17901	2.56891	2.38654	2.73346	2.43692	2.59377	2.69693	2.55207	2.7589	3.00513	2.5369
UTR		3L	7763476	A	T	FBgn0023076					0.91533	0	0	0	1.71e-06	1.71e-06	0.801527	Clk	-0.762159	0.000553808	-0.829189	0.00209483	-0.695128	3.059	3.54944	3.31971	2.76144	3.22268	3.10836	2.69267	2.17901	2.56891	2.38654	2.73346	2.43692	2.59377	2.69693	2.55207	2.7589	3.00513	2.5369
UTR		3L	7759849	C	T	FBgn0023076					1	0	0	0	9.46e-15	4.94e-14	0.977434	Clk	-0.762159	0.000553808	-0.829189	0.00209483	-0.695128	3.059	3.54944	3.31971	2.76144	3.22268	3.10836	2.69267	2.17901	2.56891	2.38654	2.73346	2.43692	2.59377	2.69693	2.55207	2.7589	3.00513	2.5369
UTR		3L	7767917	C	T	FBgn0023076					1	0	0	0	4.12e-15	1.84e-14	0.635517	Clk	-0.762159	0.000553808	-0.829189	0.00209483	-0.695128	3.059	3.54944	3.31971	2.76144	3.22268	3.10836	2.69267	2.17901	2.56891	2.38654	2.73346	2.43692	2.59377	2.69693	2.55207	2.7589	3.00513	2.5369
UTR		3L	7762303	A	G	FBgn0023076					1	0	0	0	1.02e-14	6.99e-15	0.525441	Clk	-0.762159	0.000553808	-0.829189	0.00209483	-0.695128	3.059	3.54944	3.31971	2.76144	3.22268	3.10836	2.69267	2.17901	2.56891	2.38654	2.73346	2.43692	2.59377	2.69693	2.55207	2.7589	3.00513	2.5369
UTR		3L	7762713	G	A	FBgn0023076					1	0	0	0	3.42e-14	1.68e-14	0.437198	Clk	-0.762159	0.000553808	-0.829189	0.00209483	-0.695128	3.059	3.54944	3.31971	2.76144	3.22268	3.10836	2.69267	2.17901	2.56891	2.38654	2.73346	2.43692	2.59377	2.69693	2.55207	2.7589	3.00513	2.5369

## Sheet: cyc
Category	missense substitution score	Chromosome	Position	Ref	Allele	Gene_Within	Protein	Gene_Nearest	To_TSS	To_TES	B3 Freq	O1 Freq	O3 Freq	B-O freq	p_B3O1	p_B3O3	p_O1O3	gene	O ave	p-value(B3W1 vs. O1W1)	B3-O1 1WK ratio	p-value(B3W1 vs. O3W1)	B3-O3 1WK ratio	1WKB3-1	1WKB3-2	1WKB3-3	6WKB3-1	6WKB3-2	6WKB3-3	1WKO1-1	1WKO1-2	1WKO1-3	6WKO1-1	6WKO1-2	6WKO1-3	1WKO3-1	1WKO3-2	1WKO3-3	6WKO3-1	6WKO3-2	6WKO3-3
non-coding		3L	19809062	T	A			FBgn0023094	24		0	0.911977	0.621793	-0.766885	3.36e-05	0.00664426	0.0866389	cyc	-0.307814	0.0142785	-0.228178	0.000390795	-0.38745	4.20623	4.41639	4.3369	4.35263	4.31869	4.24644	4.21331	3.99338	4.06829	4.15092	4.16229	4.14564	4.06269	3.74641	3.98807	4.23195	4.16803	4.1217
UTR		3L	19808394	A	T	FBgn0023094					0	0.955203	0.68225	-0.818727	3.43e-06	0.00576474	0.102816	cyc	-0.307814	0.0142785	-0.228178	0.000390795	-0.38745	4.20623	4.41639	4.3369	4.35263	4.31869	4.24644	4.21331	3.99338	4.06829	4.15092	4.16229	4.14564	4.06269	3.74641	3.98807	4.23195	4.16803	4.1217
UTR		3L	19808091	C	T	FBgn0023094					0.325397	0	0	0.325397	0.0346167	0.034544	0.521104	cyc	-0.307814	0.0142785	-0.228178	0.000390795	-0.38745	4.20623	4.41639	4.3369	4.35263	4.31869	4.24644	4.21331	3.99338	4.06829	4.15092	4.16229	4.14564	4.06269	3.74641	3.98807	4.23195	4.16803	4.1217
UTR		3L	19808740	G	A	FBgn0023094					0.746183	0	0	0.746183	0.00132302	0.00132337	0.859626	cyc	-0.307814	0.0142785	-0.228178	0.000390795	-0.38745	4.20623	4.41639	4.3369	4.35263	4.31869	4.24644	4.21331	3.99338	4.06829	4.15092	4.16229	4.14564	4.06269	3.74641	3.98807	4.23195	4.16803	4.1217
UTR		3L	19807870	G	A	FBgn0023094					1	0.25	0.22727	0.761365	0.000385974	0.000261877	0.950699	cyc	-0.307814	0.0142785	-0.228178	0.000390795	-0.38745	4.20623	4.41639	4.3369	4.35263	4.31869	4.24644	4.21331	3.99338	4.06829	4.15092	4.16229	4.14564	4.06269	3.74641	3.98807	4.23195	4.16803	4.1217
UTR		3L	19808954	A	G	FBgn0023094					1	0	0	1	2.52e-14	1.06e-14	0.102329	cyc	-0.307814	0.0142785	-0.228178	0.000390795	-0.38745	4.20623	4.41639	4.3369	4.35263	4.31869	4.24644	4.21331	3.99338	4.06829	4.15092	4.16229	4.14564	4.06269	3.74641	3.98807	4.23195	4.16803	4.1217

## Sheet: pdp1
Category	missense substitution score	Chromosome	Position	Ref	Allele	Gene_Within	Protein	Gene_Nearest	To_TSS	To_TES	B3 Freq	O1 Freq	O3 Freq	B-O freq	p_B3O1	p_B3O3	p_O1O3	gene	O ave	p-value(B3W1 vs. O1W1)	B3-O1 1WK ratio	p-value(B3W1 vs. O3W1)	B3-O3 1WK ratio	1WKB3-1	1WKB3-2	1WKB3-3	6WKB3-1	6WKB3-2	6WKB3-3	1WKO1-1	1WKO1-2	1WKO1-3	6WKO1-1	6WKO1-2	6WKO1-3	1WKO3-1	1WKO3-2	1WKO3-3	6WKO3-1	6WKO3-2	6WKO3-3
missense	0	3L	7824525	-	TGTTGT	FBgn0016694	Pdp1-RJ:p.[Ser52delinsAsnAsnSer]; Pdp1-RD:p.[Ser52delinsAsnAsnSer]				0.42296	0.14286	0	0.35153	0.00439344	0.00065839	0.371197	Pdp1	0.306474	4.26e-06	0.433307	0.00662408	0.17964	5.58275	5.61333	5.46335	5.46537	5.33662	5.272	5.99527	6.00401	5.96006	5.98455	6.0333	5.89829	5.74718	5.65677	5.79439	5.85172	5.79736	5.85138
missense	0	3L	7824203	TGCTGC	-	FBgn0016694	Pdp1-RJ:p.[Gln157_Gln159delinsGln]; Pdp1-RD:p.[Gln157_Gln159delinsGln]				0.462117	0	0	0.462117	3.04e-06	3.05e-06	0.321674	Pdp1	0.306474	4.26e-06	0.433307	0.00662408	0.17964	5.58275	5.61333	5.46335	5.46537	5.33662	5.272	5.99527	6.00401	5.96006	5.98455	6.0333	5.89829	5.74718	5.65677	5.79439	5.85172	5.79736	5.85138
missense	0	3L	7818822	-	TGT	FBgn0016694	Pdp1-RC:p.Thr289delinsAsnThr				0.542693	0.13333	0	0.476028	0.0034949	0.00129703	0.370365	Pdp1	0.306474	4.26e-06	0.433307	0.00662408	0.17964	5.58275	5.61333	5.46335	5.46537	5.33662	5.272	5.99527	6.00401	5.96006	5.98455	6.0333	5.89829	5.74718	5.65677	5.79439	5.85172	5.79736	5.85138
missense	0	3L	7819544	-	TGCTGC	FBgn0016694	Pdp1-RC:p.Gln48delinsGlnGlnGln				0.256863	0	0	0.256863	0.00410041	0.00408297	0.161789	Pdp1	0.306474	4.26e-06	0.433307	0.00662408	0.17964	5.58275	5.61333	5.46335	5.46537	5.33662	5.272	5.99527	6.00401	5.96006	5.98455	6.0333	5.89829	5.74718	5.65677	5.79439	5.85172	5.79736	5.85138
missense	0	3L	7819008	TGTTGT	-	FBgn0016694	Pdp1-RC:p.Asn225_Ser227delinsSer				0.47983	0	0	0.47983	5.66e-05	5.67e-05	0.747418	Pdp1	0.306474	4.26e-06	0.433307	0.00662408	0.17964	5.58275	5.61333	5.46335	5.46537	5.33662	5.272	5.99527	6.00401	5.96006	5.98455	6.0333	5.89829	5.74718	5.65677	5.79439	5.85172	5.79736	5.85138
missense	0	3L	7819009	GTTGT	ATTGC	FBgn0016694	Pdp1-RC:p.Asn225_Asn226delinsSerAsn				0.2739	0	0	0.2739	0.00461045	0.00463029	0.144229	Pdp1	0.306474	4.26e-06	0.433307	0.00662408	0.17964	5.58275	5.61333	5.46335	5.46537	5.33662	5.272	5.99527	6.00401	5.96006	5.98455	6.0333	5.89829	5.74718	5.65677	5.79439	5.85172	5.79736	5.85138
missense	1	3L	7819013	T	C	FBgn0016694	Pdp1-RC:p.Asn225Ser				0.653417	0	0	0.653417	4.7e-06	4.71e-06	0.620909	Pdp1	0.306474	4.26e-06	0.433307	0.00662408	0.17964	5.58275	5.61333	5.46335	5.46537	5.33662	5.272	5.99527	6.00401	5.96006	5.98455	6.0333	5.89829	5.74718	5.65677	5.79439	5.85172	5.79736	5.85138
non-coding		3L	7860954	A	T			FBgn0016694	485		0	1	1	-1	1.18e-14	8.24e-16	0.946409	Pdp1	0.306474	4.26e-06	0.433307	0.00662408	0.17964	5.58275	5.61333	5.46335	5.46537	5.33662	5.272	5.99527	6.00401	5.96006	5.98455	6.0333	5.89829	5.74718	5.65677	5.79439	5.85172	5.79736	5.85138
non-coding		3L	7804059	T	C			FBgn0016694		956	0	0.696163	0.38084	-0.538502	0.00849349	0.00820023	0.127268	Pdp1	0.306474	4.26e-06	0.433307	0.00662408	0.17964	5.58275	5.61333	5.46335	5.46537	5.33662	5.272	5.99527	6.00401	5.96006	5.98455	6.0333	5.89829	5.74718	5.65677	5.79439	5.85172	5.79736	5.85138
non-coding		3L	7804211	A	G			FBgn0016694		804	0	0.544753	0.336467	-0.44061	0.00305303	0.0289137	0.188776	Pdp1	0.306474	4.26e-06	0.433307	0.00662408	0.17964	5.58275	5.61333	5.46335	5.46537	5.33662	5.272	5.99527	6.00401	5.96006	5.98455	6.0333	5.89829	5.74718	5.65677	5.79439	5.85172	5.79736	5.85138
non-coding		3L	7860732	G	T			FBgn0016694	263		0.86297	0.40577	0	0.660085	0.0157926	6.15e-05	0.123121	Pdp1	0.306474	4.26e-06	0.433307	0.00662408	0.17964	5.58275	5.61333	5.46335	5.46537	5.33662	5.272	5.99527	6.00401	5.96006	5.98455	6.0333	5.89829	5.74718	5.65677	5.79439	5.85172	5.79736	5.85138
non-coding		3L	7805004	TTT	-			FBgn0016694		11	0.88646	0	0	0.88646	7.03e-05	7.03e-05	0.973379	Pdp1	0.306474	4.26e-06	0.433307	0.00662408	0.17964	5.58275	5.61333	5.46335	5.46537	5.33662	5.272	5.99527	6.00401	5.96006	5.98455	6.0333	5.89829	5.74718	5.65677	5.79439	5.85172	5.79736	5.85138
non-coding		3L	7804121	A	T			FBgn0016694		894	1	0.09091	0	0.954545	5.69e-06	1.87e-15	0.375518	Pdp1	0.306474	4.26e-06	0.433307	0.00662408	0.17964	5.58275	5.61333	5.46335	5.46537	5.33662	5.272	5.99527	6.00401	5.96006	5.98455	6.0333	5.89829	5.74718	5.65677	5.79439	5.85172	5.79736	5.85138
non-coding		3L	7804998	T	A			FBgn0016694		17	1	0	0	1	1.78e-14	1.23e-15	0.454565	Pdp1	0.306474	4.26e-06	0.433307	0.00662408	0.17964	5.58275	5.61333	5.46335	5.46537	5.33662	5.272	5.99527	6.00401	5.96006	5.98455	6.0333	5.89829	5.74718	5.65677	5.79439	5.85172	5.79736	5.85138
non-coding		3L	7804946	A	G			FBgn0016694		69	1	0	0	1	3.09e-14	4.69e-15	0.251132	Pdp1	0.306474	4.26e-06	0.433307	0.00662408	0.17964	5.58275	5.61333	5.46335	5.46537	5.33662	5.272	5.99527	6.00401	5.96006	5.98455	6.0333	5.89829	5.74718	5.65677	5.79439	5.85172	5.79736	5.85138
non-coding		3L	7804922	G	A			FBgn0016694		93	1	0	0	1	3.29e-14	1.22e-14	0.221989	Pdp1	0.306474	4.26e-06	0.433307	0.00662408	0.17964	5.58275	5.61333	5.46335	5.46537	5.33662	5.272	5.99527	6.00401	5.96006	5.98455	6.0333	5.89829	5.74718	5.65677	5.79439	5.85172	5.79736	5.85138
UTR		3L	7821567	G	A	FBgn0016694					0	0.925927	1	-0.962963	0.000233861	2.49e-14	0.374881	Pdp1	0.306474	4.26e-06	0.433307	0.00662408	0.17964	5.58275	5.61333	5.46335	5.46537	5.33662	5.272	5.99527	6.00401	5.96006	5.98455	6.0333	5.89829	5.74718	5.65677	5.79439	5.85172	5.79736	5.85138
UTR		3L	7821583	G	T	FBgn0016694					0	0.891943	1	-0.945972	0.000565526	9.44e-14	0.292214	Pdp1	0.306474	4.26e-06	0.433307	0.00662408	0.17964	5.58275	5.61333	5.46335	5.46537	5.33662	5.272	5.99527	6.00401	5.96006	5.98455	6.0333	5.89829	5.74718	5.65677	5.79439	5.85172	5.79736	5.85138
UTR		3L	7834069	T	C	FBgn0016694					0	0.857487	0.73761	-0.797548	0.000355513	0.000353848	0.299258	Pdp1	0.306474	4.26e-06	0.433307	0.00662408	0.17964	5.58275	5.61333	5.46335	5.46537	5.33662	5.272	5.99527	6.00401	5.96006	5.98455	6.0333	5.89829	5.74718	5.65677	5.79439	5.85172	5.79736	5.85138
UTR		3L	7821503	T	C	FBgn0016694					0	0.83651	0.71111	-0.77381	0.00129309	0.00471559	0.483842	Pdp1	0.306474	4.26e-06	0.433307	0.00662408	0.17964	5.58275	5.61333	5.46335	5.46537	5.33662	5.272	5.99527	6.00401	5.96006	5.98455	6.0333	5.89829	5.74718	5.65677	5.79439	5.85172	5.79736	5.85138
UTR		3L	7809250	C	T	FBgn0016694					0	0.836423	0.67619	-0.756307	0.000123417	0.0130869	0.395804	Pdp1	0.306474	4.26e-06	0.433307	0.00662408	0.17964	5.58275	5.61333	5.46335	5.46537	5.33662	5.272	5.99527	6.00401	5.96006	5.98455	6.0333	5.89829	5.74718	5.65677	5.79439	5.85172	5.79736	5.85138
UTR		3L	7827356	A	G	FBgn0016694					0	0.809763	0.68718	-0.748472	0.00195495	0.00731771	0.525311	Pdp1	0.306474	4.26e-06	0.433307	0.00662408	0.17964	5.58275	5.61333	5.46335	5.46537	5.33662	5.272	5.99527	6.00401	5.96006	5.98455	6.0333	5.89829	5.74718	5.65677	5.79439	5.85172	5.79736	5.85138
UTR		3L	7842947	G	A	FBgn0016694					0	0.871797	0.5918	-0.731798	0.000708062	0.00280199	0.0966585	Pdp1	0.306474	4.26e-06	0.433307	0.00662408	0.17964	5.58275	5.61333	5.46335	5.46537	5.33662	5.272	5.99527	6.00401	5.96006	5.98455	6.0333	5.89829	5.74718	5.65677	5.79439	5.85172	5.79736	5.85138
UTR		3L	7827350	A	G	FBgn0016694					0	0.762747	0.691027	-0.726887	0.00343083	0.00507095	0.702443	Pdp1	0.306474	4.26e-06	0.433307	0.00662408	0.17964	5.58275	5.61333	5.46335	5.46537	5.33662	5.272	5.99527	6.00401	5.96006	5.98455	6.0333	5.89829	5.74718	5.65677	5.79439	5.85172	5.79736	5.85138
UTR		3L	7837176	TC	-	FBgn0016694					0	0.778593	0.67118	-0.724887	0.00394948	0.001437	0.529773	Pdp1	0.306474	4.26e-06	0.433307	0.00662408	0.17964	5.58275	5.61333	5.46335	5.46537	5.33662	5.272	5.99527	6.00401	5.96006	5.98455	6.0333	5.89829	5.74718	5.65677	5.79439	5.85172	5.79736	5.85138
UTR		3L	7842972	T	C	FBgn0016694					0	0.833333	0.614367	-0.72385	0.000707234	0.00275933	0.163386	Pdp1	0.306474	4.26e-06	0.433307	0.00662408	0.17964	5.58275	5.61333	5.46335	5.46537	5.33662	5.272	5.99527	6.00401	5.96006	5.98455	6.0333	5.89829	5.74718	5.65677	5.79439	5.85172	5.79736	5.85138
UTR		3L	7832081	T	C	FBgn0016694					0	0.825397	0.61498	-0.720188	0.000734315	0.00136798	0.148342	Pdp1	0.306474	4.26e-06	0.433307	0.00662408	0.17964	5.58275	5.61333	5.46335	5.46537	5.33662	5.272	5.99527	6.00401	5.96006	5.98455	6.0333	5.89829	5.74718	5.65677	5.79439	5.85172	5.79736	5.85138
UTR		3L	7816992	G	A	FBgn0016694					0	0.734503	0.70321	-0.718857	0.00886885	0.00138437	0.869617	Pdp1	0.306474	4.26e-06	0.433307	0.00662408	0.17964	5.58275	5.61333	5.46335	5.46537	5.33662	5.272	5.99527	6.00401	5.96006	5.98455	6.0333	5.89829	5.74718	5.65677	5.79439	5.85172	5.79736	5.85138
UTR		3L	7842545	G	A	FBgn0016694					0	0.75902	0.65	-0.70451	0.000864807	0.00104223	0.395004	Pdp1	0.306474	4.26e-06	0.433307	0.00662408	0.17964	5.58275	5.61333	5.46335	5.46537	5.33662	5.272	5.99527	6.00401	5.96006	5.98455	6.0333	5.89829	5.74718	5.65677	5.79439	5.85172	5.79736	5.85138
UTR		3L	7842983	C	T	FBgn0016694					0	0.833333	0.572037	-0.702685	0.000630536	0.000504166	0.0631486	Pdp1	0.306474	4.26e-06	0.433307	0.00662408	0.17964	5.58275	5.61333	5.46335	5.46537	5.33662	5.272	5.99527	6.00401	5.96006	5.98455	6.0333	5.89829	5.74718	5.65677	5.79439	5.85172	5.79736	5.85138
UTR		3L	7842937	T	C	FBgn0016694					0	0.831503	0.54739	-0.689447	0.0032557	0.0105051	0.187736	Pdp1	0.306474	4.26e-06	0.433307	0.00662408	0.17964	5.58275	5.61333	5.46335	5.46537	5.33662	5.272	5.99527	6.00401	5.96006	5.98455	6.0333	5.89829	5.74718	5.65677	5.79439	5.85172	5.79736	5.85138
UTR		3L	7851145	G	A	FBgn0016694					0	0.669443	0.629563	-0.649503	3.41e-05	0.00234958	0.701358	Pdp1	0.306474	4.26e-06	0.433307	0.00662408	0.17964	5.58275	5.61333	5.46335	5.46537	5.33662	5.272	5.99527	6.00401	5.96006	5.98455	6.0333	5.89829	5.74718	5.65677	5.79439	5.85172	5.79736	5.85138
UTR		3L	7821223	C	A	FBgn0016694					0	0.562747	0.645887	-0.604317	0.00840567	0.010086	0.669885	Pdp1	0.306474	4.26e-06	0.433307	0.00662408	0.17964	5.58275	5.61333	5.46335	5.46537	5.33662	5.272	5.99527	6.00401	5.96006	5.98455	6.0333	5.89829	5.74718	5.65677	5.79439	5.85172	5.79736	5.85138
UTR		3L	7814632	A	T	FBgn0016694					0	0.4969	0.687483	-0.592192	0.00378074	0.000607818	0.153018	Pdp1	0.306474	4.26e-06	0.433307	0.00662408	0.17964	5.58275	5.61333	5.46335	5.46537	5.33662	5.272	5.99527	6.00401	5.96006	5.98455	6.0333	5.89829	5.74718	5.65677	5.79439	5.85172	5.79736	5.85138
UTR		3L	7826674	T	-	FBgn0016694					0	0.503847	0.68022	-0.592033	0.0025866	0.00030191	0.137296	Pdp1	0.306474	4.26e-06	0.433307	0.00662408	0.17964	5.58275	5.61333	5.46335	5.46537	5.33662	5.272	5.99527	6.00401	5.96006	5.98455	6.0333	5.89829	5.74718	5.65677	5.79439	5.85172	5.79736	5.85138
UTR		3L	7831827	G	A	FBgn0016694					0	0.464813	0.693123	-0.578968	0.0234233	0.00140784	0.220275	Pdp1	0.306474	4.26e-06	0.433307	0.00662408	0.17964	5.58275	5.61333	5.46335	5.46537	5.33662	5.272	5.99527	6.00401	5.96006	5.98455	6.0333	5.89829	5.74718	5.65677	5.79439	5.85172	5.79736	5.85138
UTR		3L	7835847	T	G	FBgn0016694					0	0.386047	0.741687	-0.563867	0.021008	0.00577788	0.109004	Pdp1	0.306474	4.26e-06	0.433307	0.00662408	0.17964	5.58275	5.61333	5.46335	5.46537	5.33662	5.272	5.99527	6.00401	5.96006	5.98455	6.0333	5.89829	5.74718	5.65677	5.79439	5.85172	5.79736	5.85138
UTR		3L	7825741	A	G	FBgn0016694					0	0.433333	0.691357	-0.562345	0.0208907	0.00632197	0.217006	Pdp1	0.306474	4.26e-06	0.433307	0.00662408	0.17964	5.58275	5.61333	5.46335	5.46537	5.33662	5.272	5.99527	6.00401	5.96006	5.98455	6.0333	5.89829	5.74718	5.65677	5.79439	5.85172	5.79736	5.85138
UTR		3L	7851370	G	A	FBgn0016694					0	0.48421	0.630863	-0.557537	0.0374409	0.00204776	0.463177	Pdp1	0.306474	4.26e-06	0.433307	0.00662408	0.17964	5.58275	5.61333	5.46335	5.46537	5.33662	5.272	5.99527	6.00401	5.96006	5.98455	6.0333	5.89829	5.74718	5.65677	5.79439	5.85172	5.79736	5.85138
UTR		3L	7830410	C	G	FBgn0016694					0	0.369883	0.71619	-0.543037	0.0106337	0.00569411	0.0905486	Pdp1	0.306474	4.26e-06	0.433307	0.00662408	0.17964	5.58275	5.61333	5.46335	5.46537	5.33662	5.272	5.99527	6.00401	5.96006	5.98455	6.0333	5.89829	5.74718	5.65677	5.79439	5.85172	5.79736	5.85138
UTR		3L	7827346	T	G	FBgn0016694					0	0.443493	0.626213	-0.534853	0.0118999	0.0156744	0.379331	Pdp1	0.306474	4.26e-06	0.433307	0.00662408	0.17964	5.58275	5.61333	5.46335	5.46537	5.33662	5.272	5.99527	6.00401	5.96006	5.98455	6.0333	5.89829	5.74718	5.65677	5.79439	5.85172	5.79736	5.85138
UTR		3L	7831873	A	C	FBgn0016694					0	0.391533	0.67323	-0.532382	0.00317599	0.00828883	0.136687	Pdp1	0.306474	4.26e-06	0.433307	0.00662408	0.17964	5.58275	5.61333	5.46335	5.46537	5.33662	5.272	5.99527	6.00401	5.96006	5.98455	6.0333	5.89829	5.74718	5.65677	5.79439	5.85172	5.79736	5.85138
UTR		3L	7814327	TCT	GTG	FBgn0016694					0	0.63355	0.426543	-0.530047	0.000167854	0.0234431	0.182101	Pdp1	0.306474	4.26e-06	0.433307	0.00662408	0.17964	5.58275	5.61333	5.46335	5.46537	5.33662	5.272	5.99527	6.00401	5.96006	5.98455	6.0333	5.89829	5.74718	5.65677	5.79439	5.85172	5.79736	5.85138
UTR		3L	7812564	G	A	FBgn0016694					0	0.411037	0.639263	-0.52515	0.0428749	0.00285266	0.253605	Pdp1	0.306474	4.26e-06	0.433307	0.00662408	0.17964	5.58275	5.61333	5.46335	5.46537	5.33662	5.272	5.99527	6.00401	5.96006	5.98455	6.0333	5.89829	5.74718	5.65677	5.79439	5.85172	5.79736	5.85138
UTR		3L	7838390	A	T	FBgn0016694					0	0.3854	0.66413	-0.524765	0.000924596	0.00258199	0.0619409	Pdp1	0.306474	4.26e-06	0.433307	0.00662408	0.17964	5.58275	5.61333	5.46335	5.46537	5.33662	5.272	5.99527	6.00401	5.96006	5.98455	6.0333	5.89829	5.74718	5.65677	5.79439	5.85172	5.79736	5.85138
UTR		3L	7838401	T	C	FBgn0016694					0	0.376443	0.6679	-0.522172	0.00579742	0.0016477	0.0609207	Pdp1	0.306474	4.26e-06	0.433307	0.00662408	0.17964	5.58275	5.61333	5.46335	5.46537	5.33662	5.272	5.99527	6.00401	5.96006	5.98455	6.0333	5.89829	5.74718	5.65677	5.79439	5.85172	5.79736	5.85138
UTR		3L	7815576	C	T	FBgn0016694					0	0.386077	0.657507	-0.521792	0.000923261	0.00334441	0.0761132	Pdp1	0.306474	4.26e-06	0.433307	0.00662408	0.17964	5.58275	5.61333	5.46335	5.46537	5.33662	5.272	5.99527	6.00401	5.96006	5.98455	6.0333	5.89829	5.74718	5.65677	5.79439	5.85172	5.79736	5.85138
UTR		3L	7838359	C	G	FBgn0016694					0	0.39748	0.633333	-0.515407	0.000567629	0.00989256	0.173625	Pdp1	0.306474	4.26e-06	0.433307	0.00662408	0.17964	5.58275	5.61333	5.46335	5.46537	5.33662	5.272	5.99527	6.00401	5.96006	5.98455	6.0333	5.89829	5.74718	5.65677	5.79439	5.85172	5.79736	5.85138
UTR		3L	7812401	G	T	FBgn0016694					0	0.300947	0.72596	-0.513453	0.0201816	0.00623604	0.0563646	Pdp1	0.306474	4.26e-06	0.433307	0.00662408	0.17964	5.58275	5.61333	5.46335	5.46537	5.33662	5.272	5.99527	6.00401	5.96006	5.98455	6.0333	5.89829	5.74718	5.65677	5.79439	5.85172	5.79736	5.85138
UTR		3L	7846756	T	C	FBgn0016694					0.15625	0.52822	0.77924	-0.49748	0.0412423	0.0180172	0.346255	Pdp1	0.306474	4.26e-06	0.433307	0.00662408	0.17964	5.58275	5.61333	5.46335	5.46537	5.33662	5.272	5.99527	6.00401	5.96006	5.98455	6.0333	5.89829	5.74718	5.65677	5.79439	5.85172	5.79736	5.85138
UTR		3L	7834966	C	T	FBgn0016694					0	0.336843	0.637847	-0.487345	0.0103955	0.00360257	0.0777371	Pdp1	0.306474	4.26e-06	0.433307	0.00662408	0.17964	5.58275	5.61333	5.46335	5.46537	5.33662	5.272	5.99527	6.00401	5.96006	5.98455	6.0333	5.89829	5.74718	5.65677	5.79439	5.85172	5.79736	5.85138
UTR		3L	7838327	T	A	FBgn0016694					0	0.377437	0.586503	-0.48197	4.33e-07	0.00635948	0.135476	Pdp1	0.306474	4.26e-06	0.433307	0.00662408	0.17964	5.58275	5.61333	5.46335	5.46537	5.33662	5.272	5.99527	6.00401	5.96006	5.98455	6.0333	5.89829	5.74718	5.65677	5.79439	5.85172	5.79736	5.85138
UTR		3L	7817810	A	G	FBgn0016694					0	0.320833	0.618177	-0.469505	0.0339747	0.00791142	0.138934	Pdp1	0.306474	4.26e-06	0.433307	0.00662408	0.17964	5.58275	5.61333	5.46335	5.46537	5.33662	5.272	5.99527	6.00401	5.96006	5.98455	6.0333	5.89829	5.74718	5.65677	5.79439	5.85172	5.79736	5.85138
UTR		3L	7836056	A	T	FBgn0016694					0	0.333333	0.60119	-0.467262	0.0167383	0.0121457	0.173281	Pdp1	0.306474	4.26e-06	0.433307	0.00662408	0.17964	5.58275	5.61333	5.46335	5.46537	5.33662	5.272	5.99527	6.00401	5.96006	5.98455	6.0333	5.89829	5.74718	5.65677	5.79439	5.85172	5.79736	5.85138
UTR		3L	7831812	TT	-	FBgn0016694					0	0.34332	0.583333	-0.463327	0.010967	0.00220129	0.101621	Pdp1	0.306474	4.26e-06	0.433307	0.00662408	0.17964	5.58275	5.61333	5.46335	5.46537	5.33662	5.272	5.99527	6.00401	5.96006	5.98455	6.0333	5.89829	5.74718	5.65677	5.79439	5.85172	5.79736	5.85138
UTR		3L	7858373	A	G	FBgn0016694					0	0.417097	0.507937	-0.462517	0.0370139	0.00475425	0.606872	Pdp1	0.306474	4.26e-06	0.433307	0.00662408	0.17964	5.58275	5.61333	5.46335	5.46537	5.33662	5.272	5.99527	6.00401	5.96006	5.98455	6.0333	5.89829	5.74718	5.65677	5.79439	5.85172	5.79736	5.85138
UTR		3L	7830661	C	A	FBgn0016694					0	0.42226	0.472343	-0.447302	0.0147148	0.0231968	0.779535	Pdp1	0.306474	4.26e-06	0.433307	0.00662408	0.17964	5.58275	5.61333	5.46335	5.46537	5.33662	5.272	5.99527	6.00401	5.96006	5.98455	6.0333	5.89829	5.74718	5.65677	5.79439	5.85172	5.79736	5.85138
UTR		3L	7853552	C	T	FBgn0016694					0	0.407143	0.477937	-0.44254	3.2e-06	0.0018226	0.343404	Pdp1	0.306474	4.26e-06	0.433307	0.00662408	0.17964	5.58275	5.61333	5.46335	5.46537	5.33662	5.272	5.99527	6.00401	5.96006	5.98455	6.0333	5.89829	5.74718	5.65677	5.79439	5.85172	5.79736	5.85138
UTR		3L	7817767	GGCCGC	-	FBgn0016694					0	0.332417	0.548483	-0.44045	0.00699086	0.00319804	0.117117	Pdp1	0.306474	4.26e-06	0.433307	0.00662408	0.17964	5.58275	5.61333	5.46335	5.46537	5.33662	5.272	5.99527	6.00401	5.96006	5.98455	6.0333	5.89829	5.74718	5.65677	5.79439	5.85172	5.79736	5.85138
UTR		3L	7839444	T	A	FBgn0016694					0	0.31111	0.565277	-0.438193	0.000900498	0.0159906	0.154876	Pdp1	0.306474	4.26e-06	0.433307	0.00662408	0.17964	5.58275	5.61333	5.46335	5.46537	5.33662	5.272	5.99527	6.00401	5.96006	5.98455	6.0333	5.89829	5.74718	5.65677	5.79439	5.85172	5.79736	5.85138
UTR		3L	7825385	T	G	FBgn0016694					0	0.418673	0.450133	-0.434403	0.0239751	0.0391163	0.875924	Pdp1	0.306474	4.26e-06	0.433307	0.00662408	0.17964	5.58275	5.61333	5.46335	5.46537	5.33662	5.272	5.99527	6.00401	5.96006	5.98455	6.0333	5.89829	5.74718	5.65677	5.79439	5.85172	5.79736	5.85138
UTR		3L	7826619	G	A	FBgn0016694					0	0.479487	0.36842	-0.423953	0.000315444	0.0489489	0.466156	Pdp1	0.306474	4.26e-06	0.433307	0.00662408	0.17964	5.58275	5.61333	5.46335	5.46537	5.33662	5.272	5.99527	6.00401	5.96006	5.98455	6.0333	5.89829	5.74718	5.65677	5.79439	5.85172	5.79736	5.85138
UTR		3L	7831902	G	A	FBgn0016694					0	0.48485	0.349207	-0.417028	0.00333014	0.0349224	0.375408	Pdp1	0.306474	4.26e-06	0.433307	0.00662408	0.17964	5.58275	5.61333	5.46335	5.46537	5.33662	5.272	5.99527	6.00401	5.96006	5.98455	6.0333	5.89829	5.74718	5.65677	5.79439	5.85172	5.79736	5.85138
UTR		3L	7832837	T	A	FBgn0016694					0	0.39869	0.433333	-0.416012	0.00363792	0.0353465	0.831292	Pdp1	0.306474	4.26e-06	0.433307	0.00662408	0.17964	5.58275	5.61333	5.46335	5.46537	5.33662	5.272	5.99527	6.00401	5.96006	5.98455	6.0333	5.89829	5.74718	5.65677	5.79439	5.85172	5.79736	5.85138
UTR		3L	7817665	A	T	FBgn0016694					0	0.505727	0.284723	-0.395225	0.0263431	0.0235978	0.257163	Pdp1	0.306474	4.26e-06	0.433307	0.00662408	0.17964	5.58275	5.61333	5.46335	5.46537	5.33662	5.272	5.99527	6.00401	5.96006	5.98455	6.0333	5.89829	5.74718	5.65677	5.79439	5.85172	5.79736	5.85138
UTR		3L	7839444	-	A	FBgn0016694					0	0.224637	0.527777	-0.376207	0.0043258	0.0215731	0.112417	Pdp1	0.306474	4.26e-06	0.433307	0.00662408	0.17964	5.58275	5.61333	5.46335	5.46537	5.33662	5.272	5.99527	6.00401	5.96006	5.98455	6.0333	5.89829	5.74718	5.65677	5.79439	5.85172	5.79736	5.85138
UTR		3L	7852532	G	T	FBgn0016694					0	0.27677	0.464287	-0.370528	0.00885971	0.0155917	0.218276	Pdp1	0.306474	4.26e-06	0.433307	0.00662408	0.17964	5.58275	5.61333	5.46335	5.46537	5.33662	5.272	5.99527	6.00401	5.96006	5.98455	6.0333	5.89829	5.74718	5.65677	5.79439	5.85172	5.79736	5.85138
UTR		3L	7852551	C	A	FBgn0016694					0	0.23054	0.510347	-0.370443	0.0108779	0.0211837	0.131426	Pdp1	0.306474	4.26e-06	0.433307	0.00662408	0.17964	5.58275	5.61333	5.46335	5.46537	5.33662	5.272	5.99527	6.00401	5.96006	5.98455	6.0333	5.89829	5.74718	5.65677	5.79439	5.85172	5.79736	5.85138
UTR		3L	7850343	A	G	FBgn0016694					0	0.37329	0.290047	-0.331668	0.0124865	0.0169969	0.502685	Pdp1	0.306474	4.26e-06	0.433307	0.00662408	0.17964	5.58275	5.61333	5.46335	5.46537	5.33662	5.272	5.99527	6.00401	5.96006	5.98455	6.0333	5.89829	5.74718	5.65677	5.79439	5.85172	5.79736	5.85138
UTR		3L	7852581	A	T	FBgn0016694					0	0.222223	0.41795	-0.320087	0.0163317	0.0478724	0.284157	Pdp1	0.306474	4.26e-06	0.433307	0.00662408	0.17964	5.58275	5.61333	5.46335	5.46537	5.33662	5.272	5.99527	6.00401	5.96006	5.98455	6.0333	5.89829	5.74718	5.65677	5.79439	5.85172	5.79736	5.85138
UTR		3L	7827594	C	A	FBgn0016694					0	0.282133	0.293183	-0.287658	0.000575313	0.0329501	0.912624	Pdp1	0.306474	4.26e-06	0.433307	0.00662408	0.17964	5.58275	5.61333	5.46335	5.46537	5.33662	5.272	5.99527	6.00401	5.96006	5.98455	6.0333	5.89829	5.74718	5.65677	5.79439	5.85172	5.79736	5.85138
UTR		3L	7852617	T	A	FBgn0016694					0	0.308823	0.2583	-0.283562	0.0343899	0.0377835	0.71728	Pdp1	0.306474	4.26e-06	0.433307	0.00662408	0.17964	5.58275	5.61333	5.46335	5.46537	5.33662	5.272	5.99527	6.00401	5.96006	5.98455	6.0333	5.89829	5.74718	5.65677	5.79439	5.85172	5.79736	5.85138
UTR		3L	7815315	T	A	FBgn0016694					0.0788567	0	0	0.0788567	0.00195639	0.00192144	0.275412	Pdp1	0.306474	4.26e-06	0.433307	0.00662408	0.17964	5.58275	5.61333	5.46335	5.46537	5.33662	5.272	5.99527	6.00401	5.96006	5.98455	6.0333	5.89829	5.74718	5.65677	5.79439	5.85172	5.79736	5.85138
UTR		3L	7853201	A	T	FBgn0016694					0.185243	0	0.125	0.122743	1.76e-05	0.0280791	0.378252	Pdp1	0.306474	4.26e-06	0.433307	0.00662408	0.17964	5.58275	5.61333	5.46335	5.46537	5.33662	5.272	5.99527	6.00401	5.96006	5.98455	6.0333	5.89829	5.74718	5.65677	5.79439	5.85172	5.79736	5.85138
UTR		3L	7821288	-	C	FBgn0016694					0.17342	0	0	0.17342	0.00012001	0.000119333	0.204159	Pdp1	0.306474	4.26e-06	0.433307	0.00662408	0.17964	5.58275	5.61333	5.46335	5.46537	5.33662	5.272	5.99527	6.00401	5.96006	5.98455	6.0333	5.89829	5.74718	5.65677	5.79439	5.85172	5.79736	5.85138
UTR		3L	7821293	-	AAAAAC	FBgn0016694					0.198413	0	0	0.198413	0.000367633	0.000366823	0.728019	Pdp1	0.306474	4.26e-06	0.433307	0.00662408	0.17964	5.58275	5.61333	5.46335	5.46537	5.33662	5.272	5.99527	6.00401	5.96006	5.98455	6.0333	5.89829	5.74718	5.65677	5.79439	5.85172	5.79736	5.85138
UTR		3L	7851899	-	TACATATA	FBgn0016694					0.454677	0.236695	0.26087	0.205894	0.0216798	0.0143217	0.578638	Pdp1	0.306474	4.26e-06	0.433307	0.00662408	0.17964	5.58275	5.61333	5.46335	5.46537	5.33662	5.272	5.99527	6.00401	5.96006	5.98455	6.0333	5.89829	5.74718	5.65677	5.79439	5.85172	5.79736	5.85138
UTR		3L	7825903	T	C	FBgn0016694					0.454143	0.25	0.24359	0.207348	0.0151605	0.0258206	0.171611	Pdp1	0.306474	4.26e-06	0.433307	0.00662408	0.17964	5.58275	5.61333	5.46335	5.46537	5.33662	5.272	5.99527	6.00401	5.96006	5.98455	6.0333	5.89829	5.74718	5.65677	5.79439	5.85172	5.79736	5.85138
UTR		3L	7806879	G	A	FBgn0016694					0.216297	0	0	0.216297	0.00223047	0.00222472	0.393582	Pdp1	0.306474	4.26e-06	0.433307	0.00662408	0.17964	5.58275	5.61333	5.46335	5.46537	5.33662	5.272	5.99527	6.00401	5.96006	5.98455	6.0333	5.89829	5.74718	5.65677	5.79439	5.85172	5.79736	5.85138
UTR		3L	7806890	C	T	FBgn0016694					0.266467	0.08333	0	0.224802	0.00463918	0.00103813	0.371844	Pdp1	0.306474	4.26e-06	0.433307	0.00662408	0.17964	5.58275	5.61333	5.46335	5.46537	5.33662	5.272	5.99527	6.00401	5.96006	5.98455	6.0333	5.89829	5.74718	5.65677	5.79439	5.85172	5.79736	5.85138
UTR		3L	7819579	T	C	FBgn0016694					0.239697	0	0	0.239697	0.0125581	0.0125382	0.684425	Pdp1	0.306474	4.26e-06	0.433307	0.00662408	0.17964	5.58275	5.61333	5.46335	5.46537	5.33662	5.272	5.99527	6.00401	5.96006	5.98455	6.0333	5.89829	5.74718	5.65677	5.79439	5.85172	5.79736	5.85138
UTR		3L	7821305	T	-	FBgn0016694					0.246377	0	0	0.246377	0.0070291	0.00701749	0.618014	Pdp1	0.306474	4.26e-06	0.433307	0.00662408	0.17964	5.58275	5.61333	5.46335	5.46537	5.33662	5.272	5.99527	6.00401	5.96006	5.98455	6.0333	5.89829	5.74718	5.65677	5.79439	5.85172	5.79736	5.85138
UTR		3L	7845730	C	G	FBgn0016694					0.266737	0	0	0.266737	0.0188262	0.0187722	0.333631	Pdp1	0.306474	4.26e-06	0.433307	0.00662408	0.17964	5.58275	5.61333	5.46335	5.46537	5.33662	5.272	5.99527	6.00401	5.96006	5.98455	6.0333	5.89829	5.74718	5.65677	5.79439	5.85172	5.79736	5.85138
UTR		3L	7821280	T	A	FBgn0016694					0.267867	0	0	0.267867	0.00227433	0.00227476	0.938333	Pdp1	0.306474	4.26e-06	0.433307	0.00662408	0.17964	5.58275	5.61333	5.46335	5.46537	5.33662	5.272	5.99527	6.00401	5.96006	5.98455	6.0333	5.89829	5.74718	5.65677	5.79439	5.85172	5.79736	5.85138
UTR		3L	7821293	-	C	FBgn0016694					0.330837	0.09091	0	0.285382	0.0288271	0.0175068	0.377943	Pdp1	0.306474	4.26e-06	0.433307	0.00662408	0.17964	5.58275	5.61333	5.46335	5.46537	5.33662	5.272	5.99527	6.00401	5.96006	5.98455	6.0333	5.89829	5.74718	5.65677	5.79439	5.85172	5.79736	5.85138
UTR		3L	7819573	C	T	FBgn0016694					0.288083	0	0	0.288083	0.0051185	0.00511486	0.67239	Pdp1	0.306474	4.26e-06	0.433307	0.00662408	0.17964	5.58275	5.61333	5.46335	5.46537	5.33662	5.272	5.99527	6.00401	5.96006	5.98455	6.0333	5.89829	5.74718	5.65677	5.79439	5.85172	5.79736	5.85138
UTR		3L	7814067	-	T	FBgn0016694					0.293653	0	0	0.293653	0.00594097	0.00595987	0.31576	Pdp1	0.306474	4.26e-06	0.433307	0.00662408	0.17964	5.58275	5.61333	5.46335	5.46537	5.33662	5.272	5.99527	6.00401	5.96006	5.98455	6.0333	5.89829	5.74718	5.65677	5.79439	5.85172	5.79736	5.85138
UTR		3L	7837521	C	G	FBgn0016694					0.370793	0	0.13975	0.300918	4.36e-07	0.0110065	0.207991	Pdp1	0.306474	4.26e-06	0.433307	0.00662408	0.17964	5.58275	5.61333	5.46335	5.46537	5.33662	5.272	5.99527	6.00401	5.96006	5.98455	6.0333	5.89829	5.74718	5.65677	5.79439	5.85172	5.79736	5.85138
UTR		3L	7837528	AC	-	FBgn0016694					0.381393	0	0.13846	0.312163	3.99e-06	0.00808166	0.186131	Pdp1	0.306474	4.26e-06	0.433307	0.00662408	0.17964	5.58275	5.61333	5.46335	5.46537	5.33662	5.272	5.99527	6.00401	5.96006	5.98455	6.0333	5.89829	5.74718	5.65677	5.79439	5.85172	5.79736	5.85138
UTR		3L	7851183	-	A	FBgn0016694					0.316667	0	0	0.316667	0.00197956	0.00198426	0.564172	Pdp1	0.306474	4.26e-06	0.433307	0.00662408	0.17964	5.58275	5.61333	5.46335	5.46537	5.33662	5.272	5.99527	6.00401	5.96006	5.98455	6.0333	5.89829	5.74718	5.65677	5.79439	5.85172	5.79736	5.85138
UTR		3L	7819561	T	C	FBgn0016694					0.395023	0	0.15385	0.318098	0.00186115	0.00985375	0.37295	Pdp1	0.306474	4.26e-06	0.433307	0.00662408	0.17964	5.58275	5.61333	5.46335	5.46537	5.33662	5.272	5.99527	6.00401	5.96006	5.98455	6.0333	5.89829	5.74718	5.65677	5.79439	5.85172	5.79736	5.85138
UTR		3L	7847013	-	ATTT	FBgn0016694					0.32522	0	0	0.32522	0.00185554	0.00185429	0.863748	Pdp1	0.306474	4.26e-06	0.433307	0.00662408	0.17964	5.58275	5.61333	5.46335	5.46537	5.33662	5.272	5.99527	6.00401	5.96006	5.98455	6.0333	5.89829	5.74718	5.65677	5.79439	5.85172	5.79736	5.85138
UTR		3L	7845731	-	CCTCCCG	FBgn0016694					0.332623	0	0	0.332623	0.00498207	0.00499548	0.221351	Pdp1	0.306474	4.26e-06	0.433307	0.00662408	0.17964	5.58275	5.61333	5.46335	5.46537	5.33662	5.272	5.99527	6.00401	5.96006	5.98455	6.0333	5.89829	5.74718	5.65677	5.79439	5.85172	5.79736	5.85138
UTR		3L	7846494	C	-	FBgn0016694					0.338183	0	0	0.338183	0.0203327	0.0203405	0.919838	Pdp1	0.306474	4.26e-06	0.433307	0.00662408	0.17964	5.58275	5.61333	5.46335	5.46537	5.33662	5.272	5.99527	6.00401	5.96006	5.98455	6.0333	5.89829	5.74718	5.65677	5.79439	5.85172	5.79736	5.85138
UTR		3L	7837535	G	C	FBgn0016694					0.435847	0	0.185265	0.343214	1.12e-05	0.00888257	0.124846	Pdp1	0.306474	4.26e-06	0.433307	0.00662408	0.17964	5.58275	5.61333	5.46335	5.46537	5.33662	5.272	5.99527	6.00401	5.96006	5.98455	6.0333	5.89829	5.74718	5.65677	5.79439	5.85172	5.79736	5.85138
UTR		3L	7851245	G	A	FBgn0016694					0.344473	0	0	0.344473	9.45e-05	9.44e-05	0.595452	Pdp1	0.306474	4.26e-06	0.433307	0.00662408	0.17964	5.58275	5.61333	5.46335	5.46537	5.33662	5.272	5.99527	6.00401	5.96006	5.98455	6.0333	5.89829	5.74718	5.65677	5.79439	5.85172	5.79736	5.85138
UTR		3L	7858554	-	AA	FBgn0016694					0.436877	0.18182	0	0.345967	0.0379058	0.015178	0.374614	Pdp1	0.306474	4.26e-06	0.433307	0.00662408	0.17964	5.58275	5.61333	5.46335	5.46537	5.33662	5.272	5.99527	6.00401	5.96006	5.98455	6.0333	5.89829	5.74718	5.65677	5.79439	5.85172	5.79736	5.85138
UTR		3L	7849184	T	G	FBgn0016694					0.875793	0.5	0.557423	0.347082	0.0146589	0.0114434	0.0905101	Pdp1	0.306474	4.26e-06	0.433307	0.00662408	0.17964	5.58275	5.61333	5.46335	5.46537	5.33662	5.272	5.99527	6.00401	5.96006	5.98455	6.0333	5.89829	5.74718	5.65677	5.79439	5.85172	5.79736	5.85138
UTR		3L	7840160	TATATA	-	FBgn0016694					0.347593	0	0	0.347593	0.0053815	0.00536826	0.438244	Pdp1	0.306474	4.26e-06	0.433307	0.00662408	0.17964	5.58275	5.61333	5.46335	5.46537	5.33662	5.272	5.99527	6.00401	5.96006	5.98455	6.0333	5.89829	5.74718	5.65677	5.79439	5.85172	5.79736	5.85138
UTR		3L	7849893	-	T	FBgn0016694					0.891533	0.59058	0.46	0.366243	0.0267417	0.0299881	0.211505	Pdp1	0.306474	4.26e-06	0.433307	0.00662408	0.17964	5.58275	5.61333	5.46335	5.46537	5.33662	5.272	5.99527	6.00401	5.96006	5.98455	6.0333	5.89829	5.74718	5.65677	5.79439	5.85172	5.79736	5.85138
UTR		3L	7844782	A	-	FBgn0016694					0.460317	0	0.18182	0.369407	0.000316158	0.00526142	0.374399	Pdp1	0.306474	4.26e-06	0.433307	0.00662408	0.17964	5.58275	5.61333	5.46335	5.46537	5.33662	5.272	5.99527	6.00401	5.96006	5.98455	6.0333	5.89829	5.74718	5.65677	5.79439	5.85172	5.79736	5.85138
UTR		3L	7821289	C	A	FBgn0016694					0.453293	0.125	0	0.390793	0.002174	0.00039553	0.372615	Pdp1	0.306474	4.26e-06	0.433307	0.00662408	0.17964	5.58275	5.61333	5.46335	5.46537	5.33662	5.272	5.99527	6.00401	5.96006	5.98455	6.0333	5.89829	5.74718	5.65677	5.79439	5.85172	5.79736	5.85138
UTR		3L	7809954	G	T	FBgn0016694					0.397057	0	0	0.397057	0.000133659	0.00013364	0.935923	Pdp1	0.306474	4.26e-06	0.433307	0.00662408	0.17964	5.58275	5.61333	5.46335	5.46537	5.33662	5.272	5.99527	6.00401	5.96006	5.98455	6.0333	5.89829	5.74718	5.65677	5.79439	5.85172	5.79736	5.85138
UTR		3L	7825689	A	G	FBgn0016694					1	0.702503	0.493245	0.402126	0.0143089	0.0150735	0.105755	Pdp1	0.306474	4.26e-06	0.433307	0.00662408	0.17964	5.58275	5.61333	5.46335	5.46537	5.33662	5.272	5.99527	6.00401	5.96006	5.98455	6.0333	5.89829	5.74718	5.65677	5.79439	5.85172	5.79736	5.85138
UTR		3L	7838629	A	T	FBgn0016694					0.929413	0.40392	0.63419	0.410358	0.000506793	0.0358593	0.0765148	Pdp1	0.306474	4.26e-06	0.433307	0.00662408	0.17964	5.58275	5.61333	5.46335	5.46537	5.33662	5.272	5.99527	6.00401	5.96006	5.98455	6.0333	5.89829	5.74718	5.65677	5.79439	5.85172	5.79736	5.85138
UTR		3L	7858234	-	T	FBgn0016694					0.804917	0.464813	0.324077	0.410472	0.0255934	0.0164138	0.178175	Pdp1	0.306474	4.26e-06	0.433307	0.00662408	0.17964	5.58275	5.61333	5.46335	5.46537	5.33662	5.272	5.99527	6.00401	5.96006	5.98455	6.0333	5.89829	5.74718	5.65677	5.79439	5.85172	5.79736	5.85138
UTR		3L	7852155	G	A	FBgn0016694					0.851853	0.407507	0.4709	0.41265	0.0407742	0.0423721	0.681663	Pdp1	0.306474	4.26e-06	0.433307	0.00662408	0.17964	5.58275	5.61333	5.46335	5.46537	5.33662	5.272	5.99527	6.00401	5.96006	5.98455	6.0333	5.89829	5.74718	5.65677	5.79439	5.85172	5.79736	5.85138
UTR		3L	7838626	C	A	FBgn0016694					0.934057	0.389217	0.633653	0.422622	0.000540198	0.0240568	0.0676184	Pdp1	0.306474	4.26e-06	0.433307	0.00662408	0.17964	5.58275	5.61333	5.46335	5.46537	5.33662	5.272	5.99527	6.00401	5.96006	5.98455	6.0333	5.89829	5.74718	5.65677	5.79439	5.85172	5.79736	5.85138
UTR		3L	7851188	-	CCCT	FBgn0016694					0.428043	0	0	0.428043	4.45e-05	4.44e-05	0.369233	Pdp1	0.306474	4.26e-06	0.433307	0.00662408	0.17964	5.58275	5.61333	5.46335	5.46537	5.33662	5.272	5.99527	6.00401	5.96006	5.98455	6.0333	5.89829	5.74718	5.65677	5.79439	5.85172	5.79736	5.85138
UTR		3L	7851754	A	G	FBgn0016694					0.880473	0.446153	0.444445	0.435174	0.036399	0.0238893	0.487135	Pdp1	0.306474	4.26e-06	0.433307	0.00662408	0.17964	5.58275	5.61333	5.46335	5.46537	5.33662	5.272	5.99527	6.00401	5.96006	5.98455	6.0333	5.89829	5.74718	5.65677	5.79439	5.85172	5.79736	5.85138
UTR		3L	7822391	-	AAAAA	FBgn0016694					0.4375	0	0	0.4375	0.00217057	0.00216788	0.634122	Pdp1	0.306474	4.26e-06	0.433307	0.00662408	0.17964	5.58275	5.61333	5.46335	5.46537	5.33662	5.272	5.99527	6.00401	5.96006	5.98455	6.0333	5.89829	5.74718	5.65677	5.79439	5.85172	5.79736	5.85138
UTR		3L	7851811	G	A	FBgn0016694					0.90476	0.48584	0.4471	0.43829	0.0413202	0.00130857	0.789801	Pdp1	0.306474	4.26e-06	0.433307	0.00662408	0.17964	5.58275	5.61333	5.46335	5.46537	5.33662	5.272	5.99527	6.00401	5.96006	5.98455	6.0333	5.89829	5.74718	5.65677	5.79439	5.85172	5.79736	5.85138
UTR		3L	7821400	-	T	FBgn0016694					0.68961	0.15	0.35	0.43961	0.000439857	0.0201594	0.36359	Pdp1	0.306474	4.26e-06	0.433307	0.00662408	0.17964	5.58275	5.61333	5.46335	5.46537	5.33662	5.272	5.99527	6.00401	5.96006	5.98455	6.0333	5.89829	5.74718	5.65677	5.79439	5.85172	5.79736	5.85138
UTR		3L	7846504	A	T	FBgn0016694					0.495237	0.09524	0	0.447617	0.0131522	0.00895367	0.372609	Pdp1	0.306474	4.26e-06	0.433307	0.00662408	0.17964	5.58275	5.61333	5.46335	5.46537	5.33662	5.272	5.99527	6.00401	5.96006	5.98455	6.0333	5.89829	5.74718	5.65677	5.79439	5.85172	5.79736	5.85138
UTR		3L	7826708	A	T	FBgn0016694					1	0.579367	0.52174	0.449447	0.0143257	0.00893127	0.113853	Pdp1	0.306474	4.26e-06	0.433307	0.00662408	0.17964	5.58275	5.61333	5.46335	5.46537	5.33662	5.272	5.99527	6.00401	5.96006	5.98455	6.0333	5.89829	5.74718	5.65677	5.79439	5.85172	5.79736	5.85138
UTR		3L	7849272	G	T	FBgn0016694					0.822277	0.39091	0.354397	0.449623	6.02e-05	0.0308632	0.811034	Pdp1	0.306474	4.26e-06	0.433307	0.00662408	0.17964	5.58275	5.61333	5.46335	5.46537	5.33662	5.272	5.99527	6.00401	5.96006	5.98455	6.0333	5.89829	5.74718	5.65677	5.79439	5.85172	5.79736	5.85138
UTR		3L	7837185	T	C	FBgn0016694					1	0.5	0.588927	0.455537	0.00751697	0.0449372	0.126893	Pdp1	0.306474	4.26e-06	0.433307	0.00662408	0.17964	5.58275	5.61333	5.46335	5.46537	5.33662	5.272	5.99527	6.00401	5.96006	5.98455	6.0333	5.89829	5.74718	5.65677	5.79439	5.85172	5.79736	5.85138
UTR		3L	7838101	AC	GT	FBgn0016694					0.855557	0.29091	0.48077	0.469717	0.00789943	0.0470279	0.871479	Pdp1	0.306474	4.26e-06	0.433307	0.00662408	0.17964	5.58275	5.61333	5.46335	5.46537	5.33662	5.272	5.99527	6.00401	5.96006	5.98455	6.0333	5.89829	5.74718	5.65677	5.79439	5.85172	5.79736	5.85138
UTR		3L	7806887	TTTC	-	FBgn0016694					0.472413	0	0	0.472413	0.00020445	0.000204111	0.457379	Pdp1	0.306474	4.26e-06	0.433307	0.00662408	0.17964	5.58275	5.61333	5.46335	5.46537	5.33662	5.272	5.99527	6.00401	5.96006	5.98455	6.0333	5.89829	5.74718	5.65677	5.79439	5.85172	5.79736	5.85138
UTR		3L	7848361	T	C	FBgn0016694					0.95098	0.514297	0.440995	0.473334	0.0145819	0.0470164	0.419104	Pdp1	0.306474	4.26e-06	0.433307	0.00662408	0.17964	5.58275	5.61333	5.46335	5.46537	5.33662	5.272	5.99527	6.00401	5.96006	5.98455	6.0333	5.89829	5.74718	5.65677	5.79439	5.85172	5.79736	5.85138
UTR		3L	7838585	G	A	FBgn0016694					0.95238	0.4	0.55556	0.4746	0.00376903	0.0147217	0.831345	Pdp1	0.306474	4.26e-06	0.433307	0.00662408	0.17964	5.58275	5.61333	5.46335	5.46537	5.33662	5.272	5.99527	6.00401	5.96006	5.98455	6.0333	5.89829	5.74718	5.65677	5.79439	5.85172	5.79736	5.85138
UTR		3L	7853064	A	-	FBgn0016694					0.730333	0.238095	0.263133	0.479719	0.0116151	0.00577212	0.342471	Pdp1	0.306474	4.26e-06	0.433307	0.00662408	0.17964	5.58275	5.61333	5.46335	5.46537	5.33662	5.272	5.99527	6.00401	5.96006	5.98455	6.0333	5.89829	5.74718	5.65677	5.79439	5.85172	5.79736	5.85138
UTR		3L	7845732	G	-	FBgn0016694					0.57143	0.176925	0	0.482967	0.0114715	0.00230111	0.123686	Pdp1	0.306474	4.26e-06	0.433307	0.00662408	0.17964	5.58275	5.61333	5.46335	5.46537	5.33662	5.272	5.99527	6.00401	5.96006	5.98455	6.0333	5.89829	5.74718	5.65677	5.79439	5.85172	5.79736	5.85138
UTR		3L	7814341	G	T	FBgn0016694					1	0.644183	0.386363	0.484727	0.00121038	0.00929017	0.134181	Pdp1	0.306474	4.26e-06	0.433307	0.00662408	0.17964	5.58275	5.61333	5.46335	5.46537	5.33662	5.272	5.99527	6.00401	5.96006	5.98455	6.0333	5.89829	5.74718	5.65677	5.79439	5.85172	5.79736	5.85138
UTR		3L	7852037	C	G	FBgn0016694					0.84203	0.384417	0.326753	0.486445	0.0323289	0.0305914	0.75809	Pdp1	0.306474	4.26e-06	0.433307	0.00662408	0.17964	5.58275	5.61333	5.46335	5.46537	5.33662	5.272	5.99527	6.00401	5.96006	5.98455	6.0333	5.89829	5.74718	5.65677	5.79439	5.85172	5.79736	5.85138
UTR		3L	7835145	G	C	FBgn0016694					1	0.61752	0.405635	0.488422	0.00855191	0.00625512	0.0957643	Pdp1	0.306474	4.26e-06	0.433307	0.00662408	0.17964	5.58275	5.61333	5.46335	5.46537	5.33662	5.272	5.99527	6.00401	5.96006	5.98455	6.0333	5.89829	5.74718	5.65677	5.79439	5.85172	5.79736	5.85138
UTR		3L	7832709	A	C	FBgn0016694					1	0.6	0.41827	0.490865	0.042091	0.00705144	0.651508	Pdp1	0.306474	4.26e-06	0.433307	0.00662408	0.17964	5.58275	5.61333	5.46335	5.46537	5.33662	5.272	5.99527	6.00401	5.96006	5.98455	6.0333	5.89829	5.74718	5.65677	5.79439	5.85172	5.79736	5.85138
UTR		3L	7827331	GGTG	-	FBgn0016694					0.78889	0.3	0.28571	0.496035	0.007345	0.00359635	0.492038	Pdp1	0.306474	4.26e-06	0.433307	0.00662408	0.17964	5.58275	5.61333	5.46335	5.46537	5.33662	5.272	5.99527	6.00401	5.96006	5.98455	6.0333	5.89829	5.74718	5.65677	5.79439	5.85172	5.79736	5.85138
UTR		3L	7855110	TG	-	FBgn0016694					0.88051	0.249997	0.509565	0.500729	0.0040369	0.0419081	0.662597	Pdp1	0.306474	4.26e-06	0.433307	0.00662408	0.17964	5.58275	5.61333	5.46335	5.46537	5.33662	5.272	5.99527	6.00401	5.96006	5.98455	6.0333	5.89829	5.74718	5.65677	5.79439	5.85172	5.79736	5.85138
UTR		3L	7828806	-	AA	FBgn0016694					0.759797	0.19091	0.316665	0.506009	0.00197536	0.0108646	0.532517	Pdp1	0.306474	4.26e-06	0.433307	0.00662408	0.17964	5.58275	5.61333	5.46335	5.46537	5.33662	5.272	5.99527	6.00401	5.96006	5.98455	6.0333	5.89829	5.74718	5.65677	5.79439	5.85172	5.79736	5.85138
UTR		3L	7813767	-	GGAG	FBgn0016694					0.74895	0.24	0.24547	0.506215	0.00156126	0.0206805	0.34263	Pdp1	0.306474	4.26e-06	0.433307	0.00662408	0.17964	5.58275	5.61333	5.46335	5.46537	5.33662	5.272	5.99527	6.00401	5.96006	5.98455	6.0333	5.89829	5.74718	5.65677	5.79439	5.85172	5.79736	5.85138
UTR		3L	7828115	-	A	FBgn0016694					1	0.50325	0.48205	0.50735	0.0234333	0.0349253	0.962829	Pdp1	0.306474	4.26e-06	0.433307	0.00662408	0.17964	5.58275	5.61333	5.46335	5.46537	5.33662	5.272	5.99527	6.00401	5.96006	5.98455	6.0333	5.89829	5.74718	5.65677	5.79439	5.85172	5.79736	5.85138
UTR		3L	7820266	T	-	FBgn0016694					0.955703	0.43122	0.449065	0.515561	0.0380045	0.0431673	0.971949	Pdp1	0.306474	4.26e-06	0.433307	0.00662408	0.17964	5.58275	5.61333	5.46335	5.46537	5.33662	5.272	5.99527	6.00401	5.96006	5.98455	6.0333	5.89829	5.74718	5.65677	5.79439	5.85172	5.79736	5.85138
UTR		3L	7833873	A	T	FBgn0016694					1	0.52174	0.42927	0.524495	0.00896288	0.00802175	0.645885	Pdp1	0.306474	4.26e-06	0.433307	0.00662408	0.17964	5.58275	5.61333	5.46335	5.46537	5.33662	5.272	5.99527	6.00401	5.96006	5.98455	6.0333	5.89829	5.74718	5.65677	5.79439	5.85172	5.79736	5.85138
UTR		3L	7852892	-	A	FBgn0016694					0.778617	0.18182	0.326307	0.524553	0.00146898	0.0207321	0.0866218	Pdp1	0.306474	4.26e-06	0.433307	0.00662408	0.17964	5.58275	5.61333	5.46335	5.46537	5.33662	5.272	5.99527	6.00401	5.96006	5.98455	6.0333	5.89829	5.74718	5.65677	5.79439	5.85172	5.79736	5.85138
UTR		3L	7849623	G	T	FBgn0016694					0.678583	0.30769	0	0.524738	0.00582752	2.7e-05	0.373915	Pdp1	0.306474	4.26e-06	0.433307	0.00662408	0.17964	5.58275	5.61333	5.46335	5.46537	5.33662	5.272	5.99527	6.00401	5.96006	5.98455	6.0333	5.89829	5.74718	5.65677	5.79439	5.85172	5.79736	5.85138
UTR		3L	7821279	A	G	FBgn0016694					0.902413	0.30769	0.44363	0.526753	0.00155578	0.0154535	0.345075	Pdp1	0.306474	4.26e-06	0.433307	0.00662408	0.17964	5.58275	5.61333	5.46335	5.46537	5.33662	5.272	5.99527	6.00401	5.96006	5.98455	6.0333	5.89829	5.74718	5.65677	5.79439	5.85172	5.79736	5.85138
UTR		3L	7846494	C	T	FBgn0016694					0.528483	0	0	0.528483	0.00162215	0.00162348	0.720323	Pdp1	0.306474	4.26e-06	0.433307	0.00662408	0.17964	5.58275	5.61333	5.46335	5.46537	5.33662	5.272	5.99527	6.00401	5.96006	5.98455	6.0333	5.89829	5.74718	5.65677	5.79439	5.85172	5.79736	5.85138
UTR		3L	7839207	-	A	FBgn0016694					0.59556	0.13333	0	0.528895	0.00239358	0.000894307	0.372123	Pdp1	0.306474	4.26e-06	0.433307	0.00662408	0.17964	5.58275	5.61333	5.46335	5.46537	5.33662	5.272	5.99527	6.00401	5.96006	5.98455	6.0333	5.89829	5.74718	5.65677	5.79439	5.85172	5.79736	5.85138
UTR		3L	7820454	C	G	FBgn0016694					1	0.490197	0.444445	0.532679	0.0148337	0.0441396	0.515818	Pdp1	0.306474	4.26e-06	0.433307	0.00662408	0.17964	5.58275	5.61333	5.46335	5.46537	5.33662	5.272	5.99527	6.00401	5.96006	5.98455	6.0333	5.89829	5.74718	5.65677	5.79439	5.85172	5.79736	5.85138
UTR		3L	7842765	-	T	FBgn0016694					0.59684	0.11765	0	0.538015	0.00107208	0.000352873	0.375076	Pdp1	0.306474	4.26e-06	0.433307	0.00662408	0.17964	5.58275	5.61333	5.46335	5.46537	5.33662	5.272	5.99527	6.00401	5.96006	5.98455	6.0333	5.89829	5.74718	5.65677	5.79439	5.85172	5.79736	5.85138
UTR		3L	7814373	-	TA	FBgn0016694					0.93386	0.539475	0.250757	0.538744	0.036796	0.00146383	0.610191	Pdp1	0.306474	4.26e-06	0.433307	0.00662408	0.17964	5.58275	5.61333	5.46335	5.46537	5.33662	5.272	5.99527	6.00401	5.96006	5.98455	6.0333	5.89829	5.74718	5.65677	5.79439	5.85172	5.79736	5.85138
UTR		3L	7821874	A	T	FBgn0016694					1	0.299145	0.619827	0.540514	0.0035479	0.0290326	0.0723334	Pdp1	0.306474	4.26e-06	0.433307	0.00662408	0.17964	5.58275	5.61333	5.46335	5.46537	5.33662	5.272	5.99527	6.00401	5.96006	5.98455	6.0333	5.89829	5.74718	5.65677	5.79439	5.85172	5.79736	5.85138
UTR		3L	7806762	C	T	FBgn0016694					1	0.5625	0.355933	0.540783	0.0122746	0.000397596	0.439186	Pdp1	0.306474	4.26e-06	0.433307	0.00662408	0.17964	5.58275	5.61333	5.46335	5.46537	5.33662	5.272	5.99527	6.00401	5.96006	5.98455	6.0333	5.89829	5.74718	5.65677	5.79439	5.85172	5.79736	5.85138
UTR		3L	7851764	GAG	-	FBgn0016694					0.951407	0.486893	0.325607	0.545157	0.040173	0.00253968	0.415219	Pdp1	0.306474	4.26e-06	0.433307	0.00662408	0.17964	5.58275	5.61333	5.46335	5.46537	5.33662	5.272	5.99527	6.00401	5.96006	5.98455	6.0333	5.89829	5.74718	5.65677	5.79439	5.85172	5.79736	5.85138
UTR		3L	7836163	T	A	FBgn0016694					1	0.4	0.50893	0.545535	0.00290235	0.0239219	0.42024	Pdp1	0.306474	4.26e-06	0.433307	0.00662408	0.17964	5.58275	5.61333	5.46335	5.46537	5.33662	5.272	5.99527	6.00401	5.96006	5.98455	6.0333	5.89829	5.74718	5.65677	5.79439	5.85172	5.79736	5.85138
UTR		3L	7827340	G	T	FBgn0016694					0.969697	0.4	0.44706	0.546167	0.00361031	0.0187873	0.493218	Pdp1	0.306474	4.26e-06	0.433307	0.00662408	0.17964	5.58275	5.61333	5.46335	5.46537	5.33662	5.272	5.99527	6.00401	5.96006	5.98455	6.0333	5.89829	5.74718	5.65677	5.79439	5.85172	5.79736	5.85138
UTR		3L	7856053	A	G	FBgn0016694					0.84131	0.292855	0.292243	0.548761	0.00967956	0.00866726	0.480796	Pdp1	0.306474	4.26e-06	0.433307	0.00662408	0.17964	5.58275	5.61333	5.46335	5.46537	5.33662	5.272	5.99527	6.00401	5.96006	5.98455	6.0333	5.89829	5.74718	5.65677	5.79439	5.85172	5.79736	5.85138
UTR		3L	7830950	TT	-	FBgn0016694					0.808567	0.149305	0.366665	0.550582	0.000247584	0.0107223	0.344043	Pdp1	0.306474	4.26e-06	0.433307	0.00662408	0.17964	5.58275	5.61333	5.46335	5.46537	5.33662	5.272	5.99527	6.00401	5.96006	5.98455	6.0333	5.89829	5.74718	5.65677	5.79439	5.85172	5.79736	5.85138
UTR		3L	7843492	A	T	FBgn0016694					0.89495	0.236845	0.451797	0.550629	0.00161553	0.0168551	0.0814629	Pdp1	0.306474	4.26e-06	0.433307	0.00662408	0.17964	5.58275	5.61333	5.46335	5.46537	5.33662	5.272	5.99527	6.00401	5.96006	5.98455	6.0333	5.89829	5.74718	5.65677	5.79439	5.85172	5.79736	5.85138
UTR		3L	7834281	-	G	FBgn0016694					0.86356	0.28571	0.337037	0.552187	0.00221589	0.011042	0.386167	Pdp1	0.306474	4.26e-06	0.433307	0.00662408	0.17964	5.58275	5.61333	5.46335	5.46537	5.33662	5.272	5.99527	6.00401	5.96006	5.98455	6.0333	5.89829	5.74718	5.65677	5.79439	5.85172	5.79736	5.85138
UTR		3L	7851892	A	C	FBgn0016694					1	0.4847	0.40909	0.553105	0.00919821	0.00319399	0.117409	Pdp1	0.306474	4.26e-06	0.433307	0.00662408	0.17964	5.58275	5.61333	5.46335	5.46537	5.33662	5.272	5.99527	6.00401	5.96006	5.98455	6.0333	5.89829	5.74718	5.65677	5.79439	5.85172	5.79736	5.85138
UTR		3L	7844383	-	T	FBgn0016694					0.61669	0	0.125	0.55419	0.00415488	0.00696891	0.375708	Pdp1	0.306474	4.26e-06	0.433307	0.00662408	0.17964	5.58275	5.61333	5.46335	5.46537	5.33662	5.272	5.99527	6.00401	5.96006	5.98455	6.0333	5.89829	5.74718	5.65677	5.79439	5.85172	5.79736	5.85138
UTR		3L	7857273	G	A	FBgn0016694					1	0.50606	0.37826	0.55784	0.0176032	0.00242636	0.841317	Pdp1	0.306474	4.26e-06	0.433307	0.00662408	0.17964	5.58275	5.61333	5.46335	5.46537	5.33662	5.272	5.99527	6.00401	5.96006	5.98455	6.0333	5.89829	5.74718	5.65677	5.79439	5.85172	5.79736	5.85138
UTR		3L	7812045	T	-	FBgn0016694					0.86852	0.21978	0.4	0.55863	0.000972067	0.0144308	0.513263	Pdp1	0.306474	4.26e-06	0.433307	0.00662408	0.17964	5.58275	5.61333	5.46335	5.46537	5.33662	5.272	5.99527	6.00401	5.96006	5.98455	6.0333	5.89829	5.74718	5.65677	5.79439	5.85172	5.79736	5.85138
UTR		3L	7831863	T	A	FBgn0016694					1	0.580687	0.29762	0.560847	0.00342815	0.00265585	0.0871983	Pdp1	0.306474	4.26e-06	0.433307	0.00662408	0.17964	5.58275	5.61333	5.46335	5.46537	5.33662	5.272	5.99527	6.00401	5.96006	5.98455	6.0333	5.89829	5.74718	5.65677	5.79439	5.85172	5.79736	5.85138
UTR		3L	7852135	G	C	FBgn0016694					1	0.44644	0.424787	0.564387	0.00760288	0.00063559	0.871735	Pdp1	0.306474	4.26e-06	0.433307	0.00662408	0.17964	5.58275	5.61333	5.46335	5.46537	5.33662	5.272	5.99527	6.00401	5.96006	5.98455	6.0333	5.89829	5.74718	5.65677	5.79439	5.85172	5.79736	5.85138
UTR		3L	7829895	C	G	FBgn0016694					1	0.3125	0.55556	0.56597	0.000998621	0.0117114	0.722373	Pdp1	0.306474	4.26e-06	0.433307	0.00662408	0.17964	5.58275	5.61333	5.46335	5.46537	5.33662	5.272	5.99527	6.00401	5.96006	5.98455	6.0333	5.89829	5.74718	5.65677	5.79439	5.85172	5.79736	5.85138
UTR		3L	7854326	AT	CC	FBgn0016694					0.882353	0.295847	0.335897	0.566482	0.0103521	0.0109283	0.553087	Pdp1	0.306474	4.26e-06	0.433307	0.00662408	0.17964	5.58275	5.61333	5.46335	5.46537	5.33662	5.272	5.99527	6.00401	5.96006	5.98455	6.0333	5.89829	5.74718	5.65677	5.79439	5.85172	5.79736	5.85138
UTR		3L	7834202	G	T	FBgn0016694					1	0.36574	0.5	0.56713	0.00557447	0.0178096	0.707772	Pdp1	0.306474	4.26e-06	0.433307	0.00662408	0.17964	5.58275	5.61333	5.46335	5.46537	5.33662	5.272	5.99527	6.00401	5.96006	5.98455	6.0333	5.89829	5.74718	5.65677	5.79439	5.85172	5.79736	5.85138
UTR		3L	7834099	T	G	FBgn0016694					0.783677	0.241075	0.191665	0.567307	0.00248314	0.00119445	0.784625	Pdp1	0.306474	4.26e-06	0.433307	0.00662408	0.17964	5.58275	5.61333	5.46335	5.46537	5.33662	5.272	5.99527	6.00401	5.96006	5.98455	6.0333	5.89829	5.74718	5.65677	5.79439	5.85172	5.79736	5.85138
UTR		3L	7814370	A	G	FBgn0016694					1	0.59127	0.271063	0.568833	0.0374669	0.000487017	0.589151	Pdp1	0.306474	4.26e-06	0.433307	0.00662408	0.17964	5.58275	5.61333	5.46335	5.46537	5.33662	5.272	5.99527	6.00401	5.96006	5.98455	6.0333	5.89829	5.74718	5.65677	5.79439	5.85172	5.79736	5.85138
UTR		3L	7831383	T	A	FBgn0016694					1	0.521243	0.335543	0.571607	0.00205208	0.00289497	0.203931	Pdp1	0.306474	4.26e-06	0.433307	0.00662408	0.17964	5.58275	5.61333	5.46335	5.46537	5.33662	5.272	5.99527	6.00401	5.96006	5.98455	6.0333	5.89829	5.74718	5.65677	5.79439	5.85172	5.79736	5.85138
UTR		3L	7834634	A	T	FBgn0016694					1	0.5014	0.3539	0.57235	0.00401665	0.000862601	0.253861	Pdp1	0.306474	4.26e-06	0.433307	0.00662408	0.17964	5.58275	5.61333	5.46335	5.46537	5.33662	5.272	5.99527	6.00401	5.96006	5.98455	6.0333	5.89829	5.74718	5.65677	5.79439	5.85172	5.79736	5.85138
UTR		3L	7821690	C	T	FBgn0016694					1	0.28571	0.56579	0.57425	0.000687825	0.0317263	0.259259	Pdp1	0.306474	4.26e-06	0.433307	0.00662408	0.17964	5.58275	5.61333	5.46335	5.46537	5.33662	5.272	5.99527	6.00401	5.96006	5.98455	6.0333	5.89829	5.74718	5.65677	5.79439	5.85172	5.79736	5.85138
UTR		3L	7817559	A	G	FBgn0016694					1	0.561463	0.2873	0.575618	0.0100618	0.00113357	0.099193	Pdp1	0.306474	4.26e-06	0.433307	0.00662408	0.17964	5.58275	5.61333	5.46335	5.46537	5.33662	5.272	5.99527	6.00401	5.96006	5.98455	6.0333	5.89829	5.74718	5.65677	5.79439	5.85172	5.79736	5.85138
UTR		3L	7852125	T	C	FBgn0016694					1	0.378643	0.467107	0.577125	0.00180981	0.000339317	0.411556	Pdp1	0.306474	4.26e-06	0.433307	0.00662408	0.17964	5.58275	5.61333	5.46335	5.46537	5.33662	5.272	5.99527	6.00401	5.96006	5.98455	6.0333	5.89829	5.74718	5.65677	5.79439	5.85172	5.79736	5.85138
UTR		3L	7852205	T	A	FBgn0016694					1	0.472177	0.373215	0.577304	0.0342357	0.00379464	0.344448	Pdp1	0.306474	4.26e-06	0.433307	0.00662408	0.17964	5.58275	5.61333	5.46335	5.46537	5.33662	5.272	5.99527	6.00401	5.96006	5.98455	6.0333	5.89829	5.74718	5.65677	5.79439	5.85172	5.79736	5.85138
UTR		3L	7845985	C	G	FBgn0016694					0.984127	0.44893	0.36364	0.577842	0.0119711	0.00211571	0.128895	Pdp1	0.306474	4.26e-06	0.433307	0.00662408	0.17964	5.58275	5.61333	5.46335	5.46537	5.33662	5.272	5.99527	6.00401	5.96006	5.98455	6.0333	5.89829	5.74718	5.65677	5.79439	5.85172	5.79736	5.85138
UTR		3L	7828841	C	T	FBgn0016694					0.89573	0.2	0.433575	0.578942	0.00103306	0.0175917	0.393727	Pdp1	0.306474	4.26e-06	0.433307	0.00662408	0.17964	5.58275	5.61333	5.46335	5.46537	5.33662	5.272	5.99527	6.00401	5.96006	5.98455	6.0333	5.89829	5.74718	5.65677	5.79439	5.85172	5.79736	5.85138
UTR		3L	7843510	C	A	FBgn0016694					0.89484	0.20635	0.422903	0.580213	0.00105332	0.0133029	0.0740033	Pdp1	0.306474	4.26e-06	0.433307	0.00662408	0.17964	5.58275	5.61333	5.46335	5.46537	5.33662	5.272	5.99527	6.00401	5.96006	5.98455	6.0333	5.89829	5.74718	5.65677	5.79439	5.85172	5.79736	5.85138
UTR		3L	7814016	-	T	FBgn0016694					0.664577	0.16667	0	0.581242	0.000415587	2.67e-07	0.372603	Pdp1	0.306474	4.26e-06	0.433307	0.00662408	0.17964	5.58275	5.61333	5.46335	5.46537	5.33662	5.272	5.99527	6.00401	5.96006	5.98455	6.0333	5.89829	5.74718	5.65677	5.79439	5.85172	5.79736	5.85138
UTR		3L	7851676	A	G	FBgn0016694					0.934873	0.364767	0.341237	0.581872	0.0149002	0.00885189	0.903277	Pdp1	0.306474	4.26e-06	0.433307	0.00662408	0.17964	5.58275	5.61333	5.46335	5.46537	5.33662	5.272	5.99527	6.00401	5.96006	5.98455	6.0333	5.89829	5.74718	5.65677	5.79439	5.85172	5.79736	5.85138
UTR		3L	7834742	A	G	FBgn0016694					1	0.556725	0.275223	0.584026	0.0306505	7.95e-05	0.650846	Pdp1	0.306474	4.26e-06	0.433307	0.00662408	0.17964	5.58275	5.61333	5.46335	5.46537	5.33662	5.272	5.99527	6.00401	5.96006	5.98455	6.0333	5.89829	5.74718	5.65677	5.79439	5.85172	5.79736	5.85138
UTR		3L	7833735	C	T	FBgn0016694					1	0.45833	0.365385	0.588143	0.00514426	0.00635595	0.687462	Pdp1	0.306474	4.26e-06	0.433307	0.00662408	0.17964	5.58275	5.61333	5.46335	5.46537	5.33662	5.272	5.99527	6.00401	5.96006	5.98455	6.0333	5.89829	5.74718	5.65677	5.79439	5.85172	5.79736	5.85138
UTR		3L	7828839	T	A	FBgn0016694					0.90505	0.21032	0.42334	0.58822	0.00120406	0.0149605	0.437511	Pdp1	0.306474	4.26e-06	0.433307	0.00662408	0.17964	5.58275	5.61333	5.46335	5.46537	5.33662	5.272	5.99527	6.00401	5.96006	5.98455	6.0333	5.89829	5.74718	5.65677	5.79439	5.85172	5.79736	5.85138
UTR		3L	7829533	-	A	FBgn0016694					1	0.24818	0.561147	0.595337	0.00136176	0.0192245	0.0646168	Pdp1	0.306474	4.26e-06	0.433307	0.00662408	0.17964	5.58275	5.61333	5.46335	5.46537	5.33662	5.272	5.99527	6.00401	5.96006	5.98455	6.0333	5.89829	5.74718	5.65677	5.79439	5.85172	5.79736	5.85138
UTR		3L	7846479	T	C	FBgn0016694					0.595587	0	0	0.595587	0.0038333	0.0038355	0.754137	Pdp1	0.306474	4.26e-06	0.433307	0.00662408	0.17964	5.58275	5.61333	5.46335	5.46537	5.33662	5.272	5.99527	6.00401	5.96006	5.98455	6.0333	5.89829	5.74718	5.65677	5.79439	5.85172	5.79736	5.85138
UTR		3L	7851719	C	T	FBgn0016694					1	0.48013	0.321643	0.599113	0.0360214	0.00186259	0.453883	Pdp1	0.306474	4.26e-06	0.433307	0.00662408	0.17964	5.58275	5.61333	5.46335	5.46537	5.33662	5.272	5.99527	6.00401	5.96006	5.98455	6.0333	5.89829	5.74718	5.65677	5.79439	5.85172	5.79736	5.85138
UTR		3L	7828564	A	G	FBgn0016694					1	0.375	0.42481	0.600095	0.00220476	0.00715722	0.450439	Pdp1	0.306474	4.26e-06	0.433307	0.00662408	0.17964	5.58275	5.61333	5.46335	5.46537	5.33662	5.272	5.99527	6.00401	5.96006	5.98455	6.0333	5.89829	5.74718	5.65677	5.79439	5.85172	5.79736	5.85138
UTR		3L	7828551	C	T	FBgn0016694					1	0.375	0.419505	0.602747	0.0022001	0.00729314	0.460847	Pdp1	0.306474	4.26e-06	0.433307	0.00662408	0.17964	5.58275	5.61333	5.46335	5.46537	5.33662	5.272	5.99527	6.00401	5.96006	5.98455	6.0333	5.89829	5.74718	5.65677	5.79439	5.85172	5.79736	5.85138
UTR		3L	7808975	TT	-	FBgn0016694					0.895257	0.375	0.21	0.602757	0.00552904	0.0028343	0.928332	Pdp1	0.306474	4.26e-06	0.433307	0.00662408	0.17964	5.58275	5.61333	5.46335	5.46537	5.33662	5.272	5.99527	6.00401	5.96006	5.98455	6.0333	5.89829	5.74718	5.65677	5.79439	5.85172	5.79736	5.85138
UTR		3L	7852405	C	T	FBgn0016694					1	0.539683	0.252437	0.60394	0.037289	0.000242498	0.150336	Pdp1	0.306474	4.26e-06	0.433307	0.00662408	0.17964	5.58275	5.61333	5.46335	5.46537	5.33662	5.272	5.99527	6.00401	5.96006	5.98455	6.0333	5.89829	5.74718	5.65677	5.79439	5.85172	5.79736	5.85138
UTR		3L	7806787	A	G	FBgn0016694					1	0.4375	0.354013	0.604243	0.00423001	0.00212876	0.29321	Pdp1	0.306474	4.26e-06	0.433307	0.00662408	0.17964	5.58275	5.61333	5.46335	5.46537	5.33662	5.272	5.99527	6.00401	5.96006	5.98455	6.0333	5.89829	5.74718	5.65677	5.79439	5.85172	5.79736	5.85138
UTR		3L	7815122	-	TGT	FBgn0016694					0.688577	0.16667	0	0.605242	0.00270176	0.000901374	0.376224	Pdp1	0.306474	4.26e-06	0.433307	0.00662408	0.17964	5.58275	5.61333	5.46335	5.46537	5.33662	5.272	5.99527	6.00401	5.96006	5.98455	6.0333	5.89829	5.74718	5.65677	5.79439	5.85172	5.79736	5.85138
UTR		3L	7837515	T	C	FBgn0016694					1	0.304765	0.48077	0.607233	0.00446198	0.0133468	0.608097	Pdp1	0.306474	4.26e-06	0.433307	0.00662408	0.17964	5.58275	5.61333	5.46335	5.46537	5.33662	5.272	5.99527	6.00401	5.96006	5.98455	6.0333	5.89829	5.74718	5.65677	5.79439	5.85172	5.79736	5.85138
UTR		3L	7844893	TT	-	FBgn0016694					0.724883	0.23529	0	0.607238	0.00134771	4.03e-06	0.375392	Pdp1	0.306474	4.26e-06	0.433307	0.00662408	0.17964	5.58275	5.61333	5.46335	5.46537	5.33662	5.272	5.99527	6.00401	5.96006	5.98455	6.0333	5.89829	5.74718	5.65677	5.79439	5.85172	5.79736	5.85138
UTR		3L	7826377	T	A	FBgn0016694					1	0.21672	0.568005	0.607638	0.000748385	0.0411653	0.363969	Pdp1	0.306474	4.26e-06	0.433307	0.00662408	0.17964	5.58275	5.61333	5.46335	5.46537	5.33662	5.272	5.99527	6.00401	5.96006	5.98455	6.0333	5.89829	5.74718	5.65677	5.79439	5.85172	5.79736	5.85138
UTR		3L	7806120	-	T	FBgn0016694					0.65545	0.09524	0	0.60783	6.66e-05	2.73e-06	0.379863	Pdp1	0.306474	4.26e-06	0.433307	0.00662408	0.17964	5.58275	5.61333	5.46335	5.46537	5.33662	5.272	5.99527	6.00401	5.96006	5.98455	6.0333	5.89829	5.74718	5.65677	5.79439	5.85172	5.79736	5.85138
UTR		3L	7825721	G	T	FBgn0016694					1	0.27342	0.509855	0.608362	0.0015839	0.0190277	0.483775	Pdp1	0.306474	4.26e-06	0.433307	0.00662408	0.17964	5.58275	5.61333	5.46335	5.46537	5.33662	5.272	5.99527	6.00401	5.96006	5.98455	6.0333	5.89829	5.74718	5.65677	5.79439	5.85172	5.79736	5.85138
UTR		3L	7837668	T	C	FBgn0016694					1	0.29412	0.48662	0.60963	0.000772002	0.0149206	0.303771	Pdp1	0.306474	4.26e-06	0.433307	0.00662408	0.17964	5.58275	5.61333	5.46335	5.46537	5.33662	5.272	5.99527	6.00401	5.96006	5.98455	6.0333	5.89829	5.74718	5.65677	5.79439	5.85172	5.79736	5.85138
UTR		3L	7836419	A	T	FBgn0016694					1	0.268025	0.508335	0.61182	0.0014438	0.0202972	0.481029	Pdp1	0.306474	4.26e-06	0.433307	0.00662408	0.17964	5.58275	5.61333	5.46335	5.46537	5.33662	5.272	5.99527	6.00401	5.96006	5.98455	6.0333	5.89829	5.74718	5.65677	5.79439	5.85172	5.79736	5.85138
UTR		3L	7827317	CGA	TAG	FBgn0016694					1	0.275	0.5	0.6125	0.000926317	0.00751459	0.935987	Pdp1	0.306474	4.26e-06	0.433307	0.00662408	0.17964	5.58275	5.61333	5.46335	5.46537	5.33662	5.272	5.99527	6.00401	5.96006	5.98455	6.0333	5.89829	5.74718	5.65677	5.79439	5.85172	5.79736	5.85138
UTR		3L	7854478	T	C	FBgn0016694					0.948247	0.333845	0.333797	0.614426	0.00337799	0.000120057	0.39051	Pdp1	0.306474	4.26e-06	0.433307	0.00662408	0.17964	5.58275	5.61333	5.46335	5.46537	5.33662	5.272	5.99527	6.00401	5.96006	5.98455	6.0333	5.89829	5.74718	5.65677	5.79439	5.85172	5.79736	5.85138
UTR		3L	7833885	T	A	FBgn0016694					1	0.45455	0.30952	0.617965	0.00497881	0.00159338	0.781712	Pdp1	0.306474	4.26e-06	0.433307	0.00662408	0.17964	5.58275	5.61333	5.46335	5.46537	5.33662	5.272	5.99527	6.00401	5.96006	5.98455	6.0333	5.89829	5.74718	5.65677	5.79439	5.85172	5.79736	5.85138
UTR		3L	7826745	T	G	FBgn0016694					1	0.263285	0.5	0.618358	0.000813521	0.0075056	0.965382	Pdp1	0.306474	4.26e-06	0.433307	0.00662408	0.17964	5.58275	5.61333	5.46335	5.46537	5.33662	5.272	5.99527	6.00401	5.96006	5.98455	6.0333	5.89829	5.74718	5.65677	5.79439	5.85172	5.79736	5.85138
UTR		3L	7829554	C	T	FBgn0016694					1	0.21978	0.534443	0.622888	0.000491868	0.0181407	0.0567708	Pdp1	0.306474	4.26e-06	0.433307	0.00662408	0.17964	5.58275	5.61333	5.46335	5.46537	5.33662	5.272	5.99527	6.00401	5.96006	5.98455	6.0333	5.89829	5.74718	5.65677	5.79439	5.85172	5.79736	5.85138
UTR		3L	7805872	G	-	FBgn0016694					0.879203	0.5	0	0.629203	0.0137884	1.43e-05	0.372729	Pdp1	0.306474	4.26e-06	0.433307	0.00662408	0.17964	5.58275	5.61333	5.46335	5.46537	5.33662	5.272	5.99527	6.00401	5.96006	5.98455	6.0333	5.89829	5.74718	5.65677	5.79439	5.85172	5.79736	5.85138
UTR		3L	7833047	T	C	FBgn0016694					1	0.248805	0.491665	0.629765	0.00081298	0.0232331	0.482137	Pdp1	0.306474	4.26e-06	0.433307	0.00662408	0.17964	5.58275	5.61333	5.46335	5.46537	5.33662	5.272	5.99527	6.00401	5.96006	5.98455	6.0333	5.89829	5.74718	5.65677	5.79439	5.85172	5.79736	5.85138
UTR		3L	7851688	C	G	FBgn0016694					0.92556	0.371713	0.21937	0.630018	0.0144095	0.0022128	0.243685	Pdp1	0.306474	4.26e-06	0.433307	0.00662408	0.17964	5.58275	5.61333	5.46335	5.46537	5.33662	5.272	5.99527	6.00401	5.96006	5.98455	6.0333	5.89829	5.74718	5.65677	5.79439	5.85172	5.79736	5.85138
UTR		3L	7831600	G	A	FBgn0016694					1	0.292765	0.44697	0.630132	0.00177819	0.00996654	0.612182	Pdp1	0.306474	4.26e-06	0.433307	0.00662408	0.17964	5.58275	5.61333	5.46335	5.46537	5.33662	5.272	5.99527	6.00401	5.96006	5.98455	6.0333	5.89829	5.74718	5.65677	5.79439	5.85172	5.79736	5.85138
UTR		3L	7836431	A	G	FBgn0016694					1	0.21937	0.51984	0.630395	0.0012085	0.0225203	0.392561	Pdp1	0.306474	4.26e-06	0.433307	0.00662408	0.17964	5.58275	5.61333	5.46335	5.46537	5.33662	5.272	5.99527	6.00401	5.96006	5.98455	6.0333	5.89829	5.74718	5.65677	5.79439	5.85172	5.79736	5.85138
UTR		3L	7833150	T	C	FBgn0016694					1	0.45833	0.27841	0.63163	0.00519644	0.00167788	0.870818	Pdp1	0.306474	4.26e-06	0.433307	0.00662408	0.17964	5.58275	5.61333	5.46335	5.46537	5.33662	5.272	5.99527	6.00401	5.96006	5.98455	6.0333	5.89829	5.74718	5.65677	5.79439	5.85172	5.79736	5.85138
UTR		3L	7827644	G	T	FBgn0016694					1	0.292735	0.441177	0.633044	0.00118862	0.0158647	0.221174	Pdp1	0.306474	4.26e-06	0.433307	0.00662408	0.17964	5.58275	5.61333	5.46335	5.46537	5.33662	5.272	5.99527	6.00401	5.96006	5.98455	6.0333	5.89829	5.74718	5.65677	5.79439	5.85172	5.79736	5.85138
UTR		3L	7844534	T	-	FBgn0016694					0.75893	0.25	0	0.63393	0.00162307	1.74e-05	0.374563	Pdp1	0.306474	4.26e-06	0.433307	0.00662408	0.17964	5.58275	5.61333	5.46335	5.46537	5.33662	5.272	5.99527	6.00401	5.96006	5.98455	6.0333	5.89829	5.74718	5.65677	5.79439	5.85172	5.79736	5.85138
UTR		3L	7829499	T	C	FBgn0016694					1	0.23143	0.49666	0.635955	0.000796017	0.0196634	0.427442	Pdp1	0.306474	4.26e-06	0.433307	0.00662408	0.17964	5.58275	5.61333	5.46335	5.46537	5.33662	5.272	5.99527	6.00401	5.96006	5.98455	6.0333	5.89829	5.74718	5.65677	5.79439	5.85172	5.79736	5.85138
UTR		3L	7829832	G	T	FBgn0016694					1	0.27778	0.45	0.63611	0.000609994	0.0101796	0.310564	Pdp1	0.306474	4.26e-06	0.433307	0.00662408	0.17964	5.58275	5.61333	5.46335	5.46537	5.33662	5.272	5.99527	6.00401	5.96006	5.98455	6.0333	5.89829	5.74718	5.65677	5.79439	5.85172	5.79736	5.85138
UTR		3L	7832429	G	A	FBgn0016694					1	0.37121	0.354395	0.637198	0.00389068	0.00361059	0.951277	Pdp1	0.306474	4.26e-06	0.433307	0.00662408	0.17964	5.58275	5.61333	5.46335	5.46537	5.33662	5.272	5.99527	6.00401	5.96006	5.98455	6.0333	5.89829	5.74718	5.65677	5.79439	5.85172	5.79736	5.85138
UTR		3L	7849665	T	C	FBgn0016694					0.781413	0.28571	0	0.638558	0.00232234	1.23e-05	0.373277	Pdp1	0.306474	4.26e-06	0.433307	0.00662408	0.17964	5.58275	5.61333	5.46335	5.46537	5.33662	5.272	5.99527	6.00401	5.96006	5.98455	6.0333	5.89829	5.74718	5.65677	5.79439	5.85172	5.79736	5.85138
UTR		3L	7817807	A	-	FBgn0016694					0.918413	0.225	0.333917	0.638955	0.000977759	0.00729211	0.23557	Pdp1	0.306474	4.26e-06	0.433307	0.00662408	0.17964	5.58275	5.61333	5.46335	5.46537	5.33662	5.272	5.99527	6.00401	5.96006	5.98455	6.0333	5.89829	5.74718	5.65677	5.79439	5.85172	5.79736	5.85138
UTR		3L	7833419	G	C	FBgn0016694					1	0.35714	0.36119	0.640835	0.00177135	0.00327089	0.196486	Pdp1	0.306474	4.26e-06	0.433307	0.00662408	0.17964	5.58275	5.61333	5.46335	5.46537	5.33662	5.272	5.99527	6.00401	5.96006	5.98455	6.0333	5.89829	5.74718	5.65677	5.79439	5.85172	5.79736	5.85138
UTR		3L	7813410	G	A	FBgn0016694					1	0.25	0.467535	0.641232	0.000564979	0.0144979	0.481272	Pdp1	0.306474	4.26e-06	0.433307	0.00662408	0.17964	5.58275	5.61333	5.46335	5.46537	5.33662	5.272	5.99527	6.00401	5.96006	5.98455	6.0333	5.89829	5.74718	5.65677	5.79439	5.85172	5.79736	5.85138
UTR		3L	7829900	C	T	FBgn0016694					1	0.35714	0.358335	0.642262	0.00178186	0.00949737	0.58555	Pdp1	0.306474	4.26e-06	0.433307	0.00662408	0.17964	5.58275	5.61333	5.46335	5.46537	5.33662	5.272	5.99527	6.00401	5.96006	5.98455	6.0333	5.89829	5.74718	5.65677	5.79439	5.85172	5.79736	5.85138
UTR		3L	7822218	G	A	FBgn0016694					0.991227	0.29876	0.398495	0.642599	0.0029294	0.00566495	0.73266	Pdp1	0.306474	4.26e-06	0.433307	0.00662408	0.17964	5.58275	5.61333	5.46335	5.46537	5.33662	5.272	5.99527	6.00401	5.96006	5.98455	6.0333	5.89829	5.74718	5.65677	5.79439	5.85172	5.79736	5.85138
UTR		3L	7852618	T	A	FBgn0016694					0.962627	0.25	0.38966	0.642797	0.000506894	0.00762618	0.094921	Pdp1	0.306474	4.26e-06	0.433307	0.00662408	0.17964	5.58275	5.61333	5.46335	5.46537	5.33662	5.272	5.99527	6.00401	5.96006	5.98455	6.0333	5.89829	5.74718	5.65677	5.79439	5.85172	5.79736	5.85138
UTR		3L	7835533	A	G	FBgn0016694					1	0.352225	0.36155	0.643112	0.00504636	0.000102496	0.426095	Pdp1	0.306474	4.26e-06	0.433307	0.00662408	0.17964	5.58275	5.61333	5.46335	5.46537	5.33662	5.272	5.99527	6.00401	5.96006	5.98455	6.0333	5.89829	5.74718	5.65677	5.79439	5.85172	5.79736	5.85138
UTR		3L	7836879	A	T	FBgn0016694					1	0.304765	0.406665	0.644285	0.00448208	0.00909181	0.759388	Pdp1	0.306474	4.26e-06	0.433307	0.00662408	0.17964	5.58275	5.61333	5.46335	5.46537	5.33662	5.272	5.99527	6.00401	5.96006	5.98455	6.0333	5.89829	5.74718	5.65677	5.79439	5.85172	5.79736	5.85138
UTR		3L	7821790	T	A	FBgn0016694					1	0.34524	0.36584	0.64446	0.00616524	0.01095	0.541728	Pdp1	0.306474	4.26e-06	0.433307	0.00662408	0.17964	5.58275	5.61333	5.46335	5.46537	5.33662	5.272	5.99527	6.00401	5.96006	5.98455	6.0333	5.89829	5.74718	5.65677	5.79439	5.85172	5.79736	5.85138
UTR		3L	7834193	A	G	FBgn0016694					1	0.385	0.32456	0.64522	0.00772761	0.00287924	0.728658	Pdp1	0.306474	4.26e-06	0.433307	0.00662408	0.17964	5.58275	5.61333	5.46335	5.46537	5.33662	5.272	5.99527	6.00401	5.96006	5.98455	6.0333	5.89829	5.74718	5.65677	5.79439	5.85172	5.79736	5.85138
UTR		3L	7826504	T	G	FBgn0016694					1	0.31579	0.390475	0.646867	0.00105219	0.00473958	0.407359	Pdp1	0.306474	4.26e-06	0.433307	0.00662408	0.17964	5.58275	5.61333	5.46335	5.46537	5.33662	5.272	5.99527	6.00401	5.96006	5.98455	6.0333	5.89829	5.74718	5.65677	5.79439	5.85172	5.79736	5.85138
UTR		3L	7827655	G	A	FBgn0016694					1	0.261905	0.442357	0.647869	0.00072599	0.0247473	0.21467	Pdp1	0.306474	4.26e-06	0.433307	0.00662408	0.17964	5.58275	5.61333	5.46335	5.46537	5.33662	5.272	5.99527	6.00401	5.96006	5.98455	6.0333	5.89829	5.74718	5.65677	5.79439	5.85172	5.79736	5.85138
UTR		3L	7832751	A	T	FBgn0016694					1	0.282895	0.419585	0.64876	0.00108259	0.00697854	0.621363	Pdp1	0.306474	4.26e-06	0.433307	0.00662408	0.17964	5.58275	5.61333	5.46335	5.46537	5.33662	5.272	5.99527	6.00401	5.96006	5.98455	6.0333	5.89829	5.74718	5.65677	5.79439	5.85172	5.79736	5.85138
UTR		3L	7826484	T	C	FBgn0016694					1	0.36364	0.332415	0.651973	0.00192438	0.00223951	0.575754	Pdp1	0.306474	4.26e-06	0.433307	0.00662408	0.17964	5.58275	5.61333	5.46335	5.46537	5.33662	5.272	5.99527	6.00401	5.96006	5.98455	6.0333	5.89829	5.74718	5.65677	5.79439	5.85172	5.79736	5.85138
UTR		3L	7843538	A	G	FBgn0016694					0.891533	0.169855	0.306313	0.653449	0.000755982	0.00183076	0.0639772	Pdp1	0.306474	4.26e-06	0.433307	0.00662408	0.17964	5.58275	5.61333	5.46335	5.46537	5.33662	5.272	5.99527	6.00401	5.96006	5.98455	6.0333	5.89829	5.74718	5.65677	5.79439	5.85172	5.79736	5.85138
UTR		3L	7852866	G	A	FBgn0016694					0.902777	0.23077	0.267647	0.653568	0.00262394	0.00516764	0.122536	Pdp1	0.306474	4.26e-06	0.433307	0.00662408	0.17964	5.58275	5.61333	5.46335	5.46537	5.33662	5.272	5.99527	6.00401	5.96006	5.98455	6.0333	5.89829	5.74718	5.65677	5.79439	5.85172	5.79736	5.85138
UTR		3L	7837817	A	T	FBgn0016694					1	0.24643	0.44643	0.65357	0.00118942	0.00985964	0.505449	Pdp1	0.306474	4.26e-06	0.433307	0.00662408	0.17964	5.58275	5.61333	5.46335	5.46537	5.33662	5.272	5.99527	6.00401	5.96006	5.98455	6.0333	5.89829	5.74718	5.65677	5.79439	5.85172	5.79736	5.85138
UTR		3L	7813194	-	AA	FBgn0016694					0.81161	0.31579	0	0.653715	0.00505205	0.000324609	0.373691	Pdp1	0.306474	4.26e-06	0.433307	0.00662408	0.17964	5.58275	5.61333	5.46335	5.46537	5.33662	5.272	5.99527	6.00401	5.96006	5.98455	6.0333	5.89829	5.74718	5.65677	5.79439	5.85172	5.79736	5.85138
UTR		3L	7826736	A	T	FBgn0016694					1	0.28182	0.41	0.65409	0.00151897	0.0085224	0.666522	Pdp1	0.306474	4.26e-06	0.433307	0.00662408	0.17964	5.58275	5.61333	5.46335	5.46537	5.33662	5.272	5.99527	6.00401	5.96006	5.98455	6.0333	5.89829	5.74718	5.65677	5.79439	5.85172	5.79736	5.85138
UTR		3L	7837834	T	C	FBgn0016694					1	0.233955	0.45238	0.656832	0.00184657	0.0134606	0.509408	Pdp1	0.306474	4.26e-06	0.433307	0.00662408	0.17964	5.58275	5.61333	5.46335	5.46537	5.33662	5.272	5.99527	6.00401	5.96006	5.98455	6.0333	5.89829	5.74718	5.65677	5.79439	5.85172	5.79736	5.85138
UTR		3L	7835535	G	A	FBgn0016694					1	0.314285	0.36508	0.660318	0.0030678	9.47e-05	0.296634	Pdp1	0.306474	4.26e-06	0.433307	0.00662408	0.17964	5.58275	5.61333	5.46335	5.46537	5.33662	5.272	5.99527	6.00401	5.96006	5.98455	6.0333	5.89829	5.74718	5.65677	5.79439	5.85172	5.79736	5.85138
UTR		3L	7832432	C	T	FBgn0016694					0.988097	0.37986	0.27436	0.660987	0.0044854	0.0016796	0.899179	Pdp1	0.306474	4.26e-06	0.433307	0.00662408	0.17964	5.58275	5.61333	5.46335	5.46537	5.33662	5.272	5.99527	6.00401	5.96006	5.98455	6.0333	5.89829	5.74718	5.65677	5.79439	5.85172	5.79736	5.85138
UTR		3L	7846506	T	G	FBgn0016694					0.661657	0	0	0.661657	0.00261807	0.00262054	0.551897	Pdp1	0.306474	4.26e-06	0.433307	0.00662408	0.17964	5.58275	5.61333	5.46335	5.46537	5.33662	5.272	5.99527	6.00401	5.96006	5.98455	6.0333	5.89829	5.74718	5.65677	5.79439	5.85172	5.79736	5.85138
UTR		3L	7827616	G	A	FBgn0016694					1	0.3	0.373857	0.663072	0.00142259	0.00838801	0.350936	Pdp1	0.306474	4.26e-06	0.433307	0.00662408	0.17964	5.58275	5.61333	5.46335	5.46537	5.33662	5.272	5.99527	6.00401	5.96006	5.98455	6.0333	5.89829	5.74718	5.65677	5.79439	5.85172	5.79736	5.85138
UTR		3L	7805365	-	TA	FBgn0016694					0.742737	0.15789	0	0.663792	0.00110994	0.000306227	0.374698	Pdp1	0.306474	4.26e-06	0.433307	0.00662408	0.17964	5.58275	5.61333	5.46335	5.46537	5.33662	5.272	5.99527	6.00401	5.96006	5.98455	6.0333	5.89829	5.74718	5.65677	5.79439	5.85172	5.79736	5.85138
UTR		3L	7835857	T	A	FBgn0016694					0.980393	0.23421	0.391665	0.667456	0.00180247	0.00618608	0.58083	Pdp1	0.306474	4.26e-06	0.433307	0.00662408	0.17964	5.58275	5.61333	5.46335	5.46537	5.33662	5.272	5.99527	6.00401	5.96006	5.98455	6.0333	5.89829	5.74718	5.65677	5.79439	5.85172	5.79736	5.85138
UTR		3L	7839918	T	A	FBgn0016694					0.87594	0.416665	0	0.667608	0.0297165	0.000165199	0.175904	Pdp1	0.306474	4.26e-06	0.433307	0.00662408	0.17964	5.58275	5.61333	5.46335	5.46537	5.33662	5.272	5.99527	6.00401	5.96006	5.98455	6.0333	5.89829	5.74718	5.65677	5.79439	5.85172	5.79736	5.85138
UTR		3L	7834892	C	T	FBgn0016694					1	0.29412	0.366347	0.669767	0.000776371	0.00161731	0.106064	Pdp1	0.306474	4.26e-06	0.433307	0.00662408	0.17964	5.58275	5.61333	5.46335	5.46537	5.33662	5.272	5.99527	6.00401	5.96006	5.98455	6.0333	5.89829	5.74718	5.65677	5.79439	5.85172	5.79736	5.85138
UTR		3L	7835874	G	C	FBgn0016694					1	0.25921	0.40035	0.67022	0.00150083	0.00589121	0.614965	Pdp1	0.306474	4.26e-06	0.433307	0.00662408	0.17964	5.58275	5.61333	5.46335	5.46537	5.33662	5.272	5.99527	6.00401	5.96006	5.98455	6.0333	5.89829	5.74718	5.65677	5.79439	5.85172	5.79736	5.85138
UTR		3L	7829463	G	A	FBgn0016694					1	0.28869	0.370835	0.670238	0.0011053	0.00892883	0.781993	Pdp1	0.306474	4.26e-06	0.433307	0.00662408	0.17964	5.58275	5.61333	5.46335	5.46537	5.33662	5.272	5.99527	6.00401	5.96006	5.98455	6.0333	5.89829	5.74718	5.65677	5.79439	5.85172	5.79736	5.85138
UTR		3L	7832514	G	A	FBgn0016694					1	0.36213	0.294887	0.671492	0.00365648	0.0001	0.708466	Pdp1	0.306474	4.26e-06	0.433307	0.00662408	0.17964	5.58275	5.61333	5.46335	5.46537	5.33662	5.272	5.99527	6.00401	5.96006	5.98455	6.0333	5.89829	5.74718	5.65677	5.79439	5.85172	5.79736	5.85138
UTR		3L	7822246	C	T	FBgn0016694					1	0.314285	0.341665	0.672025	0.00308819	0.00247209	0.919064	Pdp1	0.306474	4.26e-06	0.433307	0.00662408	0.17964	5.58275	5.61333	5.46335	5.46537	5.33662	5.272	5.99527	6.00401	5.96006	5.98455	6.0333	5.89829	5.74718	5.65677	5.79439	5.85172	5.79736	5.85138
UTR		3L	7843545	G	A	FBgn0016694					0.907407	0.158335	0.310817	0.672831	0.000377783	0.00134178	0.0570433	Pdp1	0.306474	4.26e-06	0.433307	0.00662408	0.17964	5.58275	5.61333	5.46335	5.46537	5.33662	5.272	5.99527	6.00401	5.96006	5.98455	6.0333	5.89829	5.74718	5.65677	5.79439	5.85172	5.79736	5.85138
UTR		3L	7841899	T	A	FBgn0016694					0.947297	0.16667	0.38072	0.673602	0.000152235	0.0386612	0.443628	Pdp1	0.306474	4.26e-06	0.433307	0.00662408	0.17964	5.58275	5.61333	5.46335	5.46537	5.33662	5.272	5.99527	6.00401	5.96006	5.98455	6.0333	5.89829	5.74718	5.65677	5.79439	5.85172	5.79736	5.85138
UTR		3L	7852434	C	G	FBgn0016694					0.928907	0.3125	0.193403	0.675955	0.00177339	0.00120929	0.536968	Pdp1	0.306474	4.26e-06	0.433307	0.00662408	0.17964	5.58275	5.61333	5.46335	5.46537	5.33662	5.272	5.99527	6.00401	5.96006	5.98455	6.0333	5.89829	5.74718	5.65677	5.79439	5.85172	5.79736	5.85138
UTR		3L	7833718	G	T	FBgn0016694					1	0.29386	0.346843	0.679648	0.00279027	0.00348432	0.404193	Pdp1	0.306474	4.26e-06	0.433307	0.00662408	0.17964	5.58275	5.61333	5.46335	5.46537	5.33662	5.272	5.99527	6.00401	5.96006	5.98455	6.0333	5.89829	5.74718	5.65677	5.79439	5.85172	5.79736	5.85138
UTR		3L	7829522	G	C	FBgn0016694					1	0.20909	0.42857	0.68117	0.000784035	0.00868613	0.451455	Pdp1	0.306474	4.26e-06	0.433307	0.00662408	0.17964	5.58275	5.61333	5.46335	5.46537	5.33662	5.272	5.99527	6.00401	5.96006	5.98455	6.0333	5.89829	5.74718	5.65677	5.79439	5.85172	5.79736	5.85138
UTR		3L	7840502	G	A	FBgn0016694					1	0.35294	0.284393	0.681333	0.0017023	0.000624576	0.29573	Pdp1	0.306474	4.26e-06	0.433307	0.00662408	0.17964	5.58275	5.61333	5.46335	5.46537	5.33662	5.272	5.99527	6.00401	5.96006	5.98455	6.0333	5.89829	5.74718	5.65677	5.79439	5.85172	5.79736	5.85138
UTR		3L	7832805	GCTT	-	FBgn0016694					0.894767	0.170675	0.255755	0.681552	0.000179196	0.00120683	0.616821	Pdp1	0.306474	4.26e-06	0.433307	0.00662408	0.17964	5.58275	5.61333	5.46335	5.46537	5.33662	5.272	5.99527	6.00401	5.96006	5.98455	6.0333	5.89829	5.74718	5.65677	5.79439	5.85172	5.79736	5.85138
UTR		3L	7837041	G	C	FBgn0016694					1	0.331895	0.300507	0.683799	0.00292727	0.00282603	0.648948	Pdp1	0.306474	4.26e-06	0.433307	0.00662408	0.17964	5.58275	5.61333	5.46335	5.46537	5.33662	5.272	5.99527	6.00401	5.96006	5.98455	6.0333	5.89829	5.74718	5.65677	5.79439	5.85172	5.79736	5.85138
UTR		3L	7829028	T	C	FBgn0016694					1	0.23112	0.4	0.68444	0.00064398	0.00532932	0.518746	Pdp1	0.306474	4.26e-06	0.433307	0.00662408	0.17964	5.58275	5.61333	5.46335	5.46537	5.33662	5.272	5.99527	6.00401	5.96006	5.98455	6.0333	5.89829	5.74718	5.65677	5.79439	5.85172	5.79736	5.85138
UTR		3L	7829860	A	G	FBgn0016694					1	0.26316	0.365603	0.685618	0.000483455	0.00732854	0.145065	Pdp1	0.306474	4.26e-06	0.433307	0.00662408	0.17964	5.58275	5.61333	5.46335	5.46537	5.33662	5.272	5.99527	6.00401	5.96006	5.98455	6.0333	5.89829	5.74718	5.65677	5.79439	5.85172	5.79736	5.85138
UTR		3L	7853404	T	A	FBgn0016694					1	0.32157	0.307145	0.685643	0.0044633	0.00231643	0.959605	Pdp1	0.306474	4.26e-06	0.433307	0.00662408	0.17964	5.58275	5.61333	5.46335	5.46537	5.33662	5.272	5.99527	6.00401	5.96006	5.98455	6.0333	5.89829	5.74718	5.65677	5.79439	5.85172	5.79736	5.85138
UTR		3L	7837717	A	G	FBgn0016694					1	0.316365	0.31174	0.685947	0.00189728	0.00160612	0.98597	Pdp1	0.306474	4.26e-06	0.433307	0.00662408	0.17964	5.58275	5.61333	5.46335	5.46537	5.33662	5.272	5.99527	6.00401	5.96006	5.98455	6.0333	5.89829	5.74718	5.65677	5.79439	5.85172	5.79736	5.85138
UTR		3L	7834504	A	C	FBgn0016694					1	0.251205	0.375	0.686897	0.00203011	0.00220685	0.815748	Pdp1	0.306474	4.26e-06	0.433307	0.00662408	0.17964	5.58275	5.61333	5.46335	5.46537	5.33662	5.272	5.99527	6.00401	5.96006	5.98455	6.0333	5.89829	5.74718	5.65677	5.79439	5.85172	5.79736	5.85138
UTR		3L	7829030	G	A	FBgn0016694					1	0.23112	0.394445	0.687218	0.000648331	0.00500078	0.528002	Pdp1	0.306474	4.26e-06	0.433307	0.00662408	0.17964	5.58275	5.61333	5.46335	5.46537	5.33662	5.272	5.99527	6.00401	5.96006	5.98455	6.0333	5.89829	5.74718	5.65677	5.79439	5.85172	5.79736	5.85138
UTR		3L	7836840	G	C	FBgn0016694					1	0.26316	0.36218	0.68733	0.000481883	0.00588952	0.136972	Pdp1	0.306474	4.26e-06	0.433307	0.00662408	0.17964	5.58275	5.61333	5.46335	5.46537	5.33662	5.272	5.99527	6.00401	5.96006	5.98455	6.0333	5.89829	5.74718	5.65677	5.79439	5.85172	5.79736	5.85138
UTR		3L	7833898	T	A	FBgn0016694					1	0.34897	0.276365	0.687333	0.00370951	0.000901328	0.771193	Pdp1	0.306474	4.26e-06	0.433307	0.00662408	0.17964	5.58275	5.61333	5.46335	5.46537	5.33662	5.272	5.99527	6.00401	5.96006	5.98455	6.0333	5.89829	5.74718	5.65677	5.79439	5.85172	5.79736	5.85138
UTR		3L	7837531	C	T	FBgn0016694					1	0.24716	0.37647	0.688185	0.000769062	0.00404029	0.607765	Pdp1	0.306474	4.26e-06	0.433307	0.00662408	0.17964	5.58275	5.61333	5.46335	5.46537	5.33662	5.272	5.99527	6.00401	5.96006	5.98455	6.0333	5.89829	5.74718	5.65677	5.79439	5.85172	5.79736	5.85138
UTR		3L	7837720	C	A	FBgn0016694					1	0.32065	0.3	0.689675	0.00234654	0.00154993	0.934064	Pdp1	0.306474	4.26e-06	0.433307	0.00662408	0.17964	5.58275	5.61333	5.46335	5.46537	5.33662	5.272	5.99527	6.00401	5.96006	5.98455	6.0333	5.89829	5.74718	5.65677	5.79439	5.85172	5.79736	5.85138
UTR		3L	7827871	G	T	FBgn0016694					1	0.22479	0.394113	0.690548	0.000346098	0.00103654	0.0774503	Pdp1	0.306474	4.26e-06	0.433307	0.00662408	0.17964	5.58275	5.61333	5.46335	5.46537	5.33662	5.272	5.99527	6.00401	5.96006	5.98455	6.0333	5.89829	5.74718	5.65677	5.79439	5.85172	5.79736	5.85138
UTR		3L	7829018	A	C	FBgn0016694					1	0.21377	0.40497	0.69063	0.000357478	0.00574077	0.457768	Pdp1	0.306474	4.26e-06	0.433307	0.00662408	0.17964	5.58275	5.61333	5.46335	5.46537	5.33662	5.272	5.99527	6.00401	5.96006	5.98455	6.0333	5.89829	5.74718	5.65677	5.79439	5.85172	5.79736	5.85138
UTR		3L	7829348	A	G	FBgn0016694					1	0.233765	0.38095	0.692643	0.000536946	0.00233746	0.858593	Pdp1	0.306474	4.26e-06	0.433307	0.00662408	0.17964	5.58275	5.61333	5.46335	5.46537	5.33662	5.272	5.99527	6.00401	5.96006	5.98455	6.0333	5.89829	5.74718	5.65677	5.79439	5.85172	5.79736	5.85138
UTR		3L	7843119	G	-	FBgn0016694					0.841143	0.29412	0	0.694083	0.00413705	0.000449519	0.372251	Pdp1	0.306474	4.26e-06	0.433307	0.00662408	0.17964	5.58275	5.61333	5.46335	5.46537	5.33662	5.272	5.99527	6.00401	5.96006	5.98455	6.0333	5.89829	5.74718	5.65677	5.79439	5.85172	5.79736	5.85138
UTR		3L	7807302	TTTT	-	FBgn0016694					0.695	0	0	0.695	5.87e-05	5.88e-05	0.391333	Pdp1	0.306474	4.26e-06	0.433307	0.00662408	0.17964	5.58275	5.61333	5.46335	5.46537	5.33662	5.272	5.99527	6.00401	5.96006	5.98455	6.0333	5.89829	5.74718	5.65677	5.79439	5.85172	5.79736	5.85138
UTR		3L	7837702	C	G	FBgn0016694					1	0.274475	0.33333	0.696098	0.00100608	0.00218365	0.802397	Pdp1	0.306474	4.26e-06	0.433307	0.00662408	0.17964	5.58275	5.61333	5.46335	5.46537	5.33662	5.272	5.99527	6.00401	5.96006	5.98455	6.0333	5.89829	5.74718	5.65677	5.79439	5.85172	5.79736	5.85138
UTR		3L	7848408	T	C	FBgn0016694					0.863003	0.33333	0	0.696338	0.00304486	2.08e-05	0.373671	Pdp1	0.306474	4.26e-06	0.433307	0.00662408	0.17964	5.58275	5.61333	5.46335	5.46537	5.33662	5.272	5.99527	6.00401	5.96006	5.98455	6.0333	5.89829	5.74718	5.65677	5.79439	5.85172	5.79736	5.85138
UTR		3L	7837707	A	T	FBgn0016694					1	0.261365	0.341665	0.698485	0.000699119	0.0024854	0.728479	Pdp1	0.306474	4.26e-06	0.433307	0.00662408	0.17964	5.58275	5.61333	5.46335	5.46537	5.33662	5.272	5.99527	6.00401	5.96006	5.98455	6.0333	5.89829	5.74718	5.65677	5.79439	5.85172	5.79736	5.85138
UTR		3L	7829471	T	C	FBgn0016694					1	0.221265	0.38	0.699368	0.000446803	0.0104013	0.592601	Pdp1	0.306474	4.26e-06	0.433307	0.00662408	0.17964	5.58275	5.61333	5.46335	5.46537	5.33662	5.272	5.99527	6.00401	5.96006	5.98455	6.0333	5.89829	5.74718	5.65677	5.79439	5.85172	5.79736	5.85138
UTR		3L	7837704	C	A	FBgn0016694					1	0.26756	0.33333	0.699555	0.000860035	0.00218512	0.777896	Pdp1	0.306474	4.26e-06	0.433307	0.00662408	0.17964	5.58275	5.61333	5.46335	5.46537	5.33662	5.272	5.99527	6.00401	5.96006	5.98455	6.0333	5.89829	5.74718	5.65677	5.79439	5.85172	5.79736	5.85138
UTR		3L	7838932	T	A	FBgn0016694					1	0.3	0.299245	0.700377	0.000840995	0.00267227	0.561618	Pdp1	0.306474	4.26e-06	0.433307	0.00662408	0.17964	5.58275	5.61333	5.46335	5.46537	5.33662	5.272	5.99527	6.00401	5.96006	5.98455	6.0333	5.89829	5.74718	5.65677	5.79439	5.85172	5.79736	5.85138
UTR		3L	7810819	A	C	FBgn0016694					1	0.278985	0.320117	0.700449	0.00199266	0.000210462	0.342764	Pdp1	0.306474	4.26e-06	0.433307	0.00662408	0.17964	5.58275	5.61333	5.46335	5.46537	5.33662	5.272	5.99527	6.00401	5.96006	5.98455	6.0333	5.89829	5.74718	5.65677	5.79439	5.85172	5.79736	5.85138
UTR		3L	7807006	A	G	FBgn0016694					1	0.23529	0.3598	0.702455	0.000298993	0.00469976	0.355414	Pdp1	0.306474	4.26e-06	0.433307	0.00662408	0.17964	5.58275	5.61333	5.46335	5.46537	5.33662	5.272	5.99527	6.00401	5.96006	5.98455	6.0333	5.89829	5.74718	5.65677	5.79439	5.85172	5.79736	5.85138
UTR		3L	7839548	-	A	FBgn0016694					0.793653	0.18182	0	0.702743	0.00146008	0.000377969	0.374348	Pdp1	0.306474	4.26e-06	0.433307	0.00662408	0.17964	5.58275	5.61333	5.46335	5.46537	5.33662	5.272	5.99527	6.00401	5.96006	5.98455	6.0333	5.89829	5.74718	5.65677	5.79439	5.85172	5.79736	5.85138
UTR		3L	7820597	C	G	FBgn0016694					1	0.25893	0.332823	0.704123	0.00162836	0.00044734	0.272242	Pdp1	0.306474	4.26e-06	0.433307	0.00662408	0.17964	5.58275	5.61333	5.46335	5.46537	5.33662	5.272	5.99527	6.00401	5.96006	5.98455	6.0333	5.89829	5.74718	5.65677	5.79439	5.85172	5.79736	5.85138
UTR		3L	7818589	A	T	FBgn0016694					1	0.58824	0	0.70588	0.0148468	1.52e-14	0.372392	Pdp1	0.306474	4.26e-06	0.433307	0.00662408	0.17964	5.58275	5.61333	5.46335	5.46537	5.33662	5.272	5.99527	6.00401	5.96006	5.98455	6.0333	5.89829	5.74718	5.65677	5.79439	5.85172	5.79736	5.85138
UTR		3L	7831325	C	T	FBgn0016694					1	0.319445	0.266665	0.706945	0.010397	0.00105043	0.868897	Pdp1	0.306474	4.26e-06	0.433307	0.00662408	0.17964	5.58275	5.61333	5.46335	5.46537	5.33662	5.272	5.99527	6.00401	5.96006	5.98455	6.0333	5.89829	5.74718	5.65677	5.79439	5.85172	5.79736	5.85138
UTR		3L	7808653	TT	-	FBgn0016694					0.708357	0	0	0.708357	2.88e-05	2.88e-05	0.597035	Pdp1	0.306474	4.26e-06	0.433307	0.00662408	0.17964	5.58275	5.61333	5.46335	5.46537	5.33662	5.272	5.99527	6.00401	5.96006	5.98455	6.0333	5.89829	5.74718	5.65677	5.79439	5.85172	5.79736	5.85138
UTR		3L	7832219	C	A	FBgn0016694					1	0.32	0.2625	0.70875	0.00350139	0.00164909	0.774336	Pdp1	0.306474	4.26e-06	0.433307	0.00662408	0.17964	5.58275	5.61333	5.46335	5.46537	5.33662	5.272	5.99527	6.00401	5.96006	5.98455	6.0333	5.89829	5.74718	5.65677	5.79439	5.85172	5.79736	5.85138
UTR		3L	7831980	G	A	FBgn0016694					0.987653	0.238095	0.318183	0.709514	0.00103856	0.000670153	0.24992	Pdp1	0.306474	4.26e-06	0.433307	0.00662408	0.17964	5.58275	5.61333	5.46335	5.46537	5.33662	5.272	5.99527	6.00401	5.96006	5.98455	6.0333	5.89829	5.74718	5.65677	5.79439	5.85172	5.79736	5.85138
UTR		3L	7858771	A	C	FBgn0016694					0.89839	0.37719	0	0.709795	0.0130549	0.000385387	0.121721	Pdp1	0.306474	4.26e-06	0.433307	0.00662408	0.17964	5.58275	5.61333	5.46335	5.46537	5.33662	5.272	5.99527	6.00401	5.96006	5.98455	6.0333	5.89829	5.74718	5.65677	5.79439	5.85172	5.79736	5.85138
UTR		3L	7836769	C	G	FBgn0016694					1	0.20348	0.37468	0.71092	0.000821572	0.0112066	0.231565	Pdp1	0.306474	4.26e-06	0.433307	0.00662408	0.17964	5.58275	5.61333	5.46335	5.46537	5.33662	5.272	5.99527	6.00401	5.96006	5.98455	6.0333	5.89829	5.74718	5.65677	5.79439	5.85172	5.79736	5.85138
UTR		3L	7828958	G	A	FBgn0016694					1	0.24351	0.33333	0.71158	0.00054189	0.00218392	0.687064	Pdp1	0.306474	4.26e-06	0.433307	0.00662408	0.17964	5.58275	5.61333	5.46335	5.46537	5.33662	5.272	5.99527	6.00401	5.96006	5.98455	6.0333	5.89829	5.74718	5.65677	5.79439	5.85172	5.79736	5.85138
UTR		3L	7842984	A	G	FBgn0016694					0.80684	0.1875	0	0.71309	0.00226954	0.000756259	0.372339	Pdp1	0.306474	4.26e-06	0.433307	0.00662408	0.17964	5.58275	5.61333	5.46335	5.46537	5.33662	5.272	5.99527	6.00401	5.96006	5.98455	6.0333	5.89829	5.74718	5.65677	5.79439	5.85172	5.79736	5.85138
UTR		3L	7850467	G	T	FBgn0016694					0.782097	0.125	0	0.719597	0.00238852	0.00144103	0.374148	Pdp1	0.306474	4.26e-06	0.433307	0.00662408	0.17964	5.58275	5.61333	5.46335	5.46537	5.33662	5.272	5.99527	6.00401	5.96006	5.98455	6.0333	5.89829	5.74718	5.65677	5.79439	5.85172	5.79736	5.85138
UTR		3L	7849180	A	C	FBgn0016694					0.87348	0.30769	0	0.719635	0.00244364	5.57e-05	0.375852	Pdp1	0.306474	4.26e-06	0.433307	0.00662408	0.17964	5.58275	5.61333	5.46335	5.46537	5.33662	5.272	5.99527	6.00401	5.96006	5.98455	6.0333	5.89829	5.74718	5.65677	5.79439	5.85172	5.79736	5.85138
UTR		3L	7847175	CT	-	FBgn0016694					0.828633	0.21429	0	0.721488	0.000847982	4.98e-05	0.376483	Pdp1	0.306474	4.26e-06	0.433307	0.00662408	0.17964	5.58275	5.61333	5.46335	5.46537	5.33662	5.272	5.99527	6.00401	5.96006	5.98455	6.0333	5.89829	5.74718	5.65677	5.79439	5.85172	5.79736	5.85138
UTR		3L	7835475	T	A	FBgn0016694					1	0.222915	0.333207	0.721939	0.000714267	0.00355157	0.261957	Pdp1	0.306474	4.26e-06	0.433307	0.00662408	0.17964	5.58275	5.61333	5.46335	5.46537	5.33662	5.272	5.99527	6.00401	5.96006	5.98455	6.0333	5.89829	5.74718	5.65677	5.79439	5.85172	5.79736	5.85138
UTR		3L	7818598	T	-	FBgn0016694					1	0.55556	0	0.72222	0.0116701	1.94e-14	0.373944	Pdp1	0.306474	4.26e-06	0.433307	0.00662408	0.17964	5.58275	5.61333	5.46335	5.46537	5.33662	5.272	5.99527	6.00401	5.96006	5.98455	6.0333	5.89829	5.74718	5.65677	5.79439	5.85172	5.79736	5.85138
UTR		3L	7835450	A	T	FBgn0016694					1	0.232025	0.323077	0.722449	0.00124573	0.00332393	0.325212	Pdp1	0.306474	4.26e-06	0.433307	0.00662408	0.17964	5.58275	5.61333	5.46335	5.46537	5.33662	5.272	5.99527	6.00401	5.96006	5.98455	6.0333	5.89829	5.74718	5.65677	5.79439	5.85172	5.79736	5.85138
UTR		3L	7830213	T	G	FBgn0016694					1	0.28726	0.267673	0.722533	0.00132802	0.000365974	0.5621	Pdp1	0.306474	4.26e-06	0.433307	0.00662408	0.17964	5.58275	5.61333	5.46335	5.46537	5.33662	5.272	5.99527	6.00401	5.96006	5.98455	6.0333	5.89829	5.74718	5.65677	5.79439	5.85172	5.79736	5.85138
UTR		3L	7840123	G	A	FBgn0016694					0.89316	0.33333	0	0.726495	0.00316306	7.66e-05	0.373411	Pdp1	0.306474	4.26e-06	0.433307	0.00662408	0.17964	5.58275	5.61333	5.46335	5.46537	5.33662	5.272	5.99527	6.00401	5.96006	5.98455	6.0333	5.89829	5.74718	5.65677	5.79439	5.85172	5.79736	5.85138
UTR		3L	7818601	A	-	FBgn0016694					1	0.545455	0	0.727272	0.0282371	7.69e-15	0.127206	Pdp1	0.306474	4.26e-06	0.433307	0.00662408	0.17964	5.58275	5.61333	5.46335	5.46537	5.33662	5.272	5.99527	6.00401	5.96006	5.98455	6.0333	5.89829	5.74718	5.65677	5.79439	5.85172	5.79736	5.85138
UTR		3L	7856965	A	T	FBgn0016694					0.878787	0	0.3	0.728787	0.000396206	0.0037187	0.373251	Pdp1	0.306474	4.26e-06	0.433307	0.00662408	0.17964	5.58275	5.61333	5.46335	5.46537	5.33662	5.272	5.99527	6.00401	5.96006	5.98455	6.0333	5.89829	5.74718	5.65677	5.79439	5.85172	5.79736	5.85138
UTR		3L	7858776	T	A	FBgn0016694					0.911433	0.365075	0	0.728896	0.0104147	0.000179459	0.134961	Pdp1	0.306474	4.26e-06	0.433307	0.00662408	0.17964	5.58275	5.61333	5.46335	5.46537	5.33662	5.272	5.99527	6.00401	5.96006	5.98455	6.0333	5.89829	5.74718	5.65677	5.79439	5.85172	5.79736	5.85138
UTR		3L	7849479	C	G	FBgn0016694					0.840223	0.22222	0	0.729113	0.000508341	1.15e-07	0.375433	Pdp1	0.306474	4.26e-06	0.433307	0.00662408	0.17964	5.58275	5.61333	5.46335	5.46537	5.33662	5.272	5.99527	6.00401	5.96006	5.98455	6.0333	5.89829	5.74718	5.65677	5.79439	5.85172	5.79736	5.85138
UTR		3L	7834801	G	A	FBgn0016694					1	0.23333	0.306103	0.730283	0.000951111	0.00181631	0.328081	Pdp1	0.306474	4.26e-06	0.433307	0.00662408	0.17964	5.58275	5.61333	5.46335	5.46537	5.33662	5.272	5.99527	6.00401	5.96006	5.98455	6.0333	5.89829	5.74718	5.65677	5.79439	5.85172	5.79736	5.85138
UTR		3L	7830217	A	G	FBgn0016694					1	0.26833	0.270483	0.730593	0.00131797	8.81e-05	0.460458	Pdp1	0.306474	4.26e-06	0.433307	0.00662408	0.17964	5.58275	5.61333	5.46335	5.46537	5.33662	5.272	5.99527	6.00401	5.96006	5.98455	6.0333	5.89829	5.74718	5.65677	5.79439	5.85172	5.79736	5.85138
UTR		3L	7836013	C	G	FBgn0016694					1	0.22222	0.31579	0.730995	0.000235194	0.0010523	0.818349	Pdp1	0.306474	4.26e-06	0.433307	0.00662408	0.17964	5.58275	5.61333	5.46335	5.46537	5.33662	5.272	5.99527	6.00401	5.96006	5.98455	6.0333	5.89829	5.74718	5.65677	5.79439	5.85172	5.79736	5.85138
UTR		3L	7841789	C	G	FBgn0016694					0.858023	0.25	0	0.733023	0.00235367	0.000347454	0.376808	Pdp1	0.306474	4.26e-06	0.433307	0.00662408	0.17964	5.58275	5.61333	5.46335	5.46537	5.33662	5.272	5.99527	6.00401	5.96006	5.98455	6.0333	5.89829	5.74718	5.65677	5.79439	5.85172	5.79736	5.85138
UTR		3L	7845743	T	-	FBgn0016694					0.98485	0.503495	0	0.733102	0.0189556	3.46e-07	0.118956	Pdp1	0.306474	4.26e-06	0.433307	0.00662408	0.17964	5.58275	5.61333	5.46335	5.46537	5.33662	5.272	5.99527	6.00401	5.96006	5.98455	6.0333	5.89829	5.74718	5.65677	5.79439	5.85172	5.79736	5.85138
UTR		3L	7827111	TC	CT	FBgn0016694					1	0.236845	0.29269	0.735232	0.000469672	0.000647719	0.283548	Pdp1	0.306474	4.26e-06	0.433307	0.00662408	0.17964	5.58275	5.61333	5.46335	5.46537	5.33662	5.272	5.99527	6.00401	5.96006	5.98455	6.0333	5.89829	5.74718	5.65677	5.79439	5.85172	5.79736	5.85138
UTR		3L	7818599	A	G	FBgn0016694					1	0.52941	0	0.735295	0.00956862	1.02e-14	0.373841	Pdp1	0.306474	4.26e-06	0.433307	0.00662408	0.17964	5.58275	5.61333	5.46335	5.46537	5.33662	5.272	5.99527	6.00401	5.96006	5.98455	6.0333	5.89829	5.74718	5.65677	5.79439	5.85172	5.79736	5.85138
UTR		3L	7858768	A	C	FBgn0016694					0.911433	0.350875	0	0.735996	0.00750221	0.000178539	0.117772	Pdp1	0.306474	4.26e-06	0.433307	0.00662408	0.17964	5.58275	5.61333	5.46335	5.46537	5.33662	5.272	5.99527	6.00401	5.96006	5.98455	6.0333	5.89829	5.74718	5.65677	5.79439	5.85172	5.79736	5.85138
UTR		3L	7858762	T	A	FBgn0016694					0.913107	0.35357	0	0.736322	0.00768845	0.000185999	0.116225	Pdp1	0.306474	4.26e-06	0.433307	0.00662408	0.17964	5.58275	5.61333	5.46335	5.46537	5.33662	5.272	5.99527	6.00401	5.96006	5.98455	6.0333	5.89829	5.74718	5.65677	5.79439	5.85172	5.79736	5.85138
UTR		3L	7859040	T	A	FBgn0016694					0.937143	0.4	0	0.737143	0.0104187	4.45e-05	0.127028	Pdp1	0.306474	4.26e-06	0.433307	0.00662408	0.17964	5.58275	5.61333	5.46335	5.46537	5.33662	5.272	5.99527	6.00401	5.96006	5.98455	6.0333	5.89829	5.74718	5.65677	5.79439	5.85172	5.79736	5.85138
UTR		3L	7838729	-	TTC	FBgn0016694					0.73855	0	0	0.73855	1.99e-05	1.99e-05	0.739541	Pdp1	0.306474	4.26e-06	0.433307	0.00662408	0.17964	5.58275	5.61333	5.46335	5.46537	5.33662	5.272	5.99527	6.00401	5.96006	5.98455	6.0333	5.89829	5.74718	5.65677	5.79439	5.85172	5.79736	5.85138
UTR		3L	7836742	A	G	FBgn0016694					1	0.195025	0.326823	0.739076	0.000573642	0.00243281	0.210249	Pdp1	0.306474	4.26e-06	0.433307	0.00662408	0.17964	5.58275	5.61333	5.46335	5.46537	5.33662	5.272	5.99527	6.00401	5.96006	5.98455	6.0333	5.89829	5.74718	5.65677	5.79439	5.85172	5.79736	5.85138
UTR		3L	7826674	T	A	FBgn0016694					1	0.2	0.31978	0.74011	0.000201014	0.000301072	0.101758	Pdp1	0.306474	4.26e-06	0.433307	0.00662408	0.17964	5.58275	5.61333	5.46335	5.46537	5.33662	5.272	5.99527	6.00401	5.96006	5.98455	6.0333	5.89829	5.74718	5.65677	5.79439	5.85172	5.79736	5.85138
UTR		3L	7830162	C	T	FBgn0016694					1	0.180555	0.335163	0.742141	0.000263204	0.00873005	0.242674	Pdp1	0.306474	4.26e-06	0.433307	0.00662408	0.17964	5.58275	5.61333	5.46335	5.46537	5.33662	5.272	5.99527	6.00401	5.96006	5.98455	6.0333	5.89829	5.74718	5.65677	5.79439	5.85172	5.79736	5.85138
UTR		3L	7830175	A	T	FBgn0016694					1	0.229165	0.28526	0.742787	0.000959608	0.00307959	0.421148	Pdp1	0.306474	4.26e-06	0.433307	0.00662408	0.17964	5.58275	5.61333	5.46335	5.46537	5.33662	5.272	5.99527	6.00401	5.96006	5.98455	6.0333	5.89829	5.74718	5.65677	5.79439	5.85172	5.79736	5.85138
UTR		3L	7835242	AA	TC	FBgn0016694					1	0.215075	0.297683	0.743621	0.000714998	0.000553057	0.251385	Pdp1	0.306474	4.26e-06	0.433307	0.00662408	0.17964	5.58275	5.61333	5.46335	5.46537	5.33662	5.272	5.99527	6.00401	5.96006	5.98455	6.0333	5.89829	5.74718	5.65677	5.79439	5.85172	5.79736	5.85138
UTR		3L	7822558	G	C	FBgn0016694					1	0.27536	0.234125	0.745258	0.00111718	0.00133464	0.857615	Pdp1	0.306474	4.26e-06	0.433307	0.00662408	0.17964	5.58275	5.61333	5.46335	5.46537	5.33662	5.272	5.99527	6.00401	5.96006	5.98455	6.0333	5.89829	5.74718	5.65677	5.79439	5.85172	5.79736	5.85138
UTR		3L	7849540	T	C	FBgn0016694					0.851393	0	0.21053	0.746128	1.27e-08	0.000379698	0.374472	Pdp1	0.306474	4.26e-06	0.433307	0.00662408	0.17964	5.58275	5.61333	5.46335	5.46537	5.33662	5.272	5.99527	6.00401	5.96006	5.98455	6.0333	5.89829	5.74718	5.65677	5.79439	5.85172	5.79736	5.85138
UTR		3L	7858764	C	G	FBgn0016694					0.912037	0.328845	0	0.747614	0.00591404	0.000179935	0.117368	Pdp1	0.306474	4.26e-06	0.433307	0.00662408	0.17964	5.58275	5.61333	5.46335	5.46537	5.33662	5.272	5.99527	6.00401	5.96006	5.98455	6.0333	5.89829	5.74718	5.65677	5.79439	5.85172	5.79736	5.85138
UTR		3L	7844736	G	A	FBgn0016694					0.851077	0.2	0	0.751077	0.000719314	7.26e-05	0.372775	Pdp1	0.306474	4.26e-06	0.433307	0.00662408	0.17964	5.58275	5.61333	5.46335	5.46537	5.33662	5.272	5.99527	6.00401	5.96006	5.98455	6.0333	5.89829	5.74718	5.65677	5.79439	5.85172	5.79736	5.85138
UTR		3L	7822777	T	C	FBgn0016694					1	0.15	0.34005	0.754975	4.48e-05	0.0127408	0.397723	Pdp1	0.306474	4.26e-06	0.433307	0.00662408	0.17964	5.58275	5.61333	5.46335	5.46537	5.33662	5.272	5.99527	6.00401	5.96006	5.98455	6.0333	5.89829	5.74718	5.65677	5.79439	5.85172	5.79736	5.85138
UTR		3L	7825380	G	A	FBgn0016694					1	0.36364	0.12576	0.7553	0.00191308	3.28e-05	0.787641	Pdp1	0.306474	4.26e-06	0.433307	0.00662408	0.17964	5.58275	5.61333	5.46335	5.46537	5.33662	5.272	5.99527	6.00401	5.96006	5.98455	6.0333	5.89829	5.74718	5.65677	5.79439	5.85172	5.79736	5.85138
UTR		3L	7843708	G	C	FBgn0016694					0.833653	0.15385	0	0.756728	0.000112819	1.02e-07	0.372446	Pdp1	0.306474	4.26e-06	0.433307	0.00662408	0.17964	5.58275	5.61333	5.46335	5.46537	5.33662	5.272	5.99527	6.00401	5.96006	5.98455	6.0333	5.89829	5.74718	5.65677	5.79439	5.85172	5.79736	5.85138
UTR		3L	7849154	C	T	FBgn0016694					0.891027	0.26667	0	0.757692	0.00131746	4.22e-05	0.374265	Pdp1	0.306474	4.26e-06	0.433307	0.00662408	0.17964	5.58275	5.61333	5.46335	5.46537	5.33662	5.272	5.99527	6.00401	5.96006	5.98455	6.0333	5.89829	5.74718	5.65677	5.79439	5.85172	5.79736	5.85138
UTR		3L	7807458	-	A	FBgn0016694					0.84207	0.16667	0	0.758735	0.000173417	1.17e-06	0.372511	Pdp1	0.306474	4.26e-06	0.433307	0.00662408	0.17964	5.58275	5.61333	5.46335	5.46537	5.33662	5.272	5.99527	6.00401	5.96006	5.98455	6.0333	5.89829	5.74718	5.65677	5.79439	5.85172	5.79736	5.85138
UTR		3L	7843710	A	-	FBgn0016694					0.835703	0.15385	0	0.758778	0.000116986	1.47e-07	0.377591	Pdp1	0.306474	4.26e-06	0.433307	0.00662408	0.17964	5.58275	5.61333	5.46335	5.46537	5.33662	5.272	5.99527	6.00401	5.96006	5.98455	6.0333	5.89829	5.74718	5.65677	5.79439	5.85172	5.79736	5.85138
UTR		3L	7849015	T	C	FBgn0016694					0.75881	0	0	0.75881	0.000169248	0.000169178	0.810935	Pdp1	0.306474	4.26e-06	0.433307	0.00662408	0.17964	5.58275	5.61333	5.46335	5.46537	5.33662	5.272	5.99527	6.00401	5.96006	5.98455	6.0333	5.89829	5.74718	5.65677	5.79439	5.85172	5.79736	5.85138
UTR		3L	7846448	T	G	FBgn0016694					0.76091	0	0	0.76091	0.00318104	0.0031878	0.0532899	Pdp1	0.306474	4.26e-06	0.433307	0.00662408	0.17964	5.58275	5.61333	5.46335	5.46537	5.33662	5.272	5.99527	6.00401	5.96006	5.98455	6.0333	5.89829	5.74718	5.65677	5.79439	5.85172	5.79736	5.85138
UTR		3L	7822463	G	T	FBgn0016694					1	0.175	0.296543	0.764228	0.00035736	0.0019589	0.224159	Pdp1	0.306474	4.26e-06	0.433307	0.00662408	0.17964	5.58275	5.61333	5.46335	5.46537	5.33662	5.272	5.99527	6.00401	5.96006	5.98455	6.0333	5.89829	5.74718	5.65677	5.79439	5.85172	5.79736	5.85138
UTR		3L	7836012	C	-	FBgn0016694					1	0.15459	0.31579	0.76481	0.000158504	0.00105792	0.984978	Pdp1	0.306474	4.26e-06	0.433307	0.00662408	0.17964	5.58275	5.61333	5.46335	5.46537	5.33662	5.272	5.99527	6.00401	5.96006	5.98455	6.0333	5.89829	5.74718	5.65677	5.79439	5.85172	5.79736	5.85138
UTR		3L	7859359	A	G	FBgn0016694					0.902083	0.270823	0	0.766672	0.00405158	1.74e-07	0.0624271	Pdp1	0.306474	4.26e-06	0.433307	0.00662408	0.17964	5.58275	5.61333	5.46335	5.46537	5.33662	5.272	5.99527	6.00401	5.96006	5.98455	6.0333	5.89829	5.74718	5.65677	5.79439	5.85172	5.79736	5.85138
UTR		3L	7836295	A	T	FBgn0016694					1	0.22727	0.234793	0.768968	0.000257808	0.00150789	0.270792	Pdp1	0.306474	4.26e-06	0.433307	0.00662408	0.17964	5.58275	5.61333	5.46335	5.46537	5.33662	5.272	5.99527	6.00401	5.96006	5.98455	6.0333	5.89829	5.74718	5.65677	5.79439	5.85172	5.79736	5.85138
UTR		3L	7819159	T	C	FBgn0016694					0.950617	0.25	0.1	0.775617	0.000640203	3.91e-05	0.607499	Pdp1	0.306474	4.26e-06	0.433307	0.00662408	0.17964	5.58275	5.61333	5.46335	5.46537	5.33662	5.272	5.99527	6.00401	5.96006	5.98455	6.0333	5.89829	5.74718	5.65677	5.79439	5.85172	5.79736	5.85138
UTR		3L	7849144	A	T	FBgn0016694					0.891153	0.23077	0	0.775768	0.000655798	1.46e-05	0.3762	Pdp1	0.306474	4.26e-06	0.433307	0.00662408	0.17964	5.58275	5.61333	5.46335	5.46537	5.33662	5.272	5.99527	6.00401	5.96006	5.98455	6.0333	5.89829	5.74718	5.65677	5.79439	5.85172	5.79736	5.85138
UTR		3L	7809958	T	A	FBgn0016694					0.853533	0.15385	0	0.776608	0.0010603	0.000426862	0.372312	Pdp1	0.306474	4.26e-06	0.433307	0.00662408	0.17964	5.58275	5.61333	5.46335	5.46537	5.33662	5.272	5.99527	6.00401	5.96006	5.98455	6.0333	5.89829	5.74718	5.65677	5.79439	5.85172	5.79736	5.85138
UTR		3L	7858734	G	T	FBgn0016694					0.91349	0.27171	0	0.777635	0.00414144	0.000211359	0.150401	Pdp1	0.306474	4.26e-06	0.433307	0.00662408	0.17964	5.58275	5.61333	5.46335	5.46537	5.33662	5.272	5.99527	6.00401	5.96006	5.98455	6.0333	5.89829	5.74718	5.65677	5.79439	5.85172	5.79736	5.85138
UTR		3L	7827483	C	T	FBgn0016694					1	0.16752	0.275555	0.778463	0.00014707	0.00350021	0.649322	Pdp1	0.306474	4.26e-06	0.433307	0.00662408	0.17964	5.58275	5.61333	5.46335	5.46537	5.33662	5.272	5.99527	6.00401	5.96006	5.98455	6.0333	5.89829	5.74718	5.65677	5.79439	5.85172	5.79736	5.85138
UTR		3L	7848574	A	T	FBgn0016694					0.919233	0.27273	0	0.782868	0.000834825	1.3e-07	0.375066	Pdp1	0.306474	4.26e-06	0.433307	0.00662408	0.17964	5.58275	5.61333	5.46335	5.46537	5.33662	5.272	5.99527	6.00401	5.96006	5.98455	6.0333	5.89829	5.74718	5.65677	5.79439	5.85172	5.79736	5.85138
UTR		3L	7844216	G	A	FBgn0016694					0.900837	0.23529	0	0.783192	0.000490459	2.67e-07	0.371669	Pdp1	0.306474	4.26e-06	0.433307	0.00662408	0.17964	5.58275	5.61333	5.46335	5.46537	5.33662	5.272	5.99527	6.00401	5.96006	5.98455	6.0333	5.89829	5.74718	5.65677	5.79439	5.85172	5.79736	5.85138
UTR		3L	7858707	C	A	FBgn0016694					0.88103	0.1935	0	0.78428	0.00173354	0.000333608	0.119173	Pdp1	0.306474	4.26e-06	0.433307	0.00662408	0.17964	5.58275	5.61333	5.46335	5.46537	5.33662	5.272	5.99527	6.00401	5.96006	5.98455	6.0333	5.89829	5.74718	5.65677	5.79439	5.85172	5.79736	5.85138
UTR		3L	7806130	A	T	FBgn0016694					0.88196	0.19048	0	0.78672	0.000481643	4.56e-05	0.369991	Pdp1	0.306474	4.26e-06	0.433307	0.00662408	0.17964	5.58275	5.61333	5.46335	5.46537	5.33662	5.272	5.99527	6.00401	5.96006	5.98455	6.0333	5.89829	5.74718	5.65677	5.79439	5.85172	5.79736	5.85138
UTR		3L	7843356	C	T	FBgn0016694					0.7874	0	0	0.7874	6.11e-08	6.11e-08	0.60115	Pdp1	0.306474	4.26e-06	0.433307	0.00662408	0.17964	5.58275	5.61333	5.46335	5.46537	5.33662	5.272	5.99527	6.00401	5.96006	5.98455	6.0333	5.89829	5.74718	5.65677	5.79439	5.85172	5.79736	5.85138
UTR		3L	7807999	-	G	FBgn0016694					0.91852	0.26087	0	0.788085	0.000774522	2.99e-06	0.375352	Pdp1	0.306474	4.26e-06	0.433307	0.00662408	0.17964	5.58275	5.61333	5.46335	5.46537	5.33662	5.272	5.99527	6.00401	5.96006	5.98455	6.0333	5.89829	5.74718	5.65677	5.79439	5.85172	5.79736	5.85138
UTR		3L	7845243	A	G	FBgn0016694					0.865517	0.15	0	0.790517	0.000167582	1.26e-05	0.372777	Pdp1	0.306474	4.26e-06	0.433307	0.00662408	0.17964	5.58275	5.61333	5.46335	5.46537	5.33662	5.272	5.99527	6.00401	5.96006	5.98455	6.0333	5.89829	5.74718	5.65677	5.79439	5.85172	5.79736	5.85138
UTR		3L	7826673	-	AC	FBgn0016694					1	0.125	0.28182	0.79659	3.22e-05	0.00152615	0.412178	Pdp1	0.306474	4.26e-06	0.433307	0.00662408	0.17964	5.58275	5.61333	5.46335	5.46537	5.33662	5.272	5.99527	6.00401	5.96006	5.98455	6.0333	5.89829	5.74718	5.65677	5.79439	5.85172	5.79736	5.85138
UTR		3L	7830684	T	A	FBgn0016694					1	0.124545	0.278283	0.798586	3.38e-05	0.001521	0.132739	Pdp1	0.306474	4.26e-06	0.433307	0.00662408	0.17964	5.58275	5.61333	5.46335	5.46537	5.33662	5.272	5.99527	6.00401	5.96006	5.98455	6.0333	5.89829	5.74718	5.65677	5.79439	5.85172	5.79736	5.85138
UTR		3L	7829364	T	A	FBgn0016694					1	0.133335	0.26667	0.799997	4.68e-05	0.00050882	0.997923	Pdp1	0.306474	4.26e-06	0.433307	0.00662408	0.17964	5.58275	5.61333	5.46335	5.46537	5.33662	5.272	5.99527	6.00401	5.96006	5.98455	6.0333	5.89829	5.74718	5.65677	5.79439	5.85172	5.79736	5.85138
UTR		3L	7810926	TG	-	FBgn0016694					1	0.4	0	0.8	0.00533265	4.48e-16	0.115789	Pdp1	0.306474	4.26e-06	0.433307	0.00662408	0.17964	5.58275	5.61333	5.46335	5.46537	5.33662	5.272	5.99527	6.00401	5.96006	5.98455	6.0333	5.89829	5.74718	5.65677	5.79439	5.85172	5.79736	5.85138
UTR		3L	7829362	C	G	FBgn0016694					1	0.130955	0.26667	0.801187	4.64e-05	0.000509101	0.985511	Pdp1	0.306474	4.26e-06	0.433307	0.00662408	0.17964	5.58275	5.61333	5.46335	5.46537	5.33662	5.272	5.99527	6.00401	5.96006	5.98455	6.0333	5.89829	5.74718	5.65677	5.79439	5.85172	5.79736	5.85138
UTR		3L	7845930	A	G	FBgn0016694					0.867373	0.125	0	0.804873	0.000103614	1.35e-05	0.374372	Pdp1	0.306474	4.26e-06	0.433307	0.00662408	0.17964	5.58275	5.61333	5.46335	5.46537	5.33662	5.272	5.99527	6.00401	5.96006	5.98455	6.0333	5.89829	5.74718	5.65677	5.79439	5.85172	5.79736	5.85138
UTR		3L	7820458	-	T	FBgn0016694					0.808467	0	0	0.808467	2.09e-05	2.09e-05	0.938081	Pdp1	0.306474	4.26e-06	0.433307	0.00662408	0.17964	5.58275	5.61333	5.46335	5.46537	5.33662	5.272	5.99527	6.00401	5.96006	5.98455	6.0333	5.89829	5.74718	5.65677	5.79439	5.85172	5.79736	5.85138
UTR		3L	7836130	T	G	FBgn0016694					0.892397	0.16667	0	0.809062	0.000421252	8.09e-05	0.372266	Pdp1	0.306474	4.26e-06	0.433307	0.00662408	0.17964	5.58275	5.61333	5.46335	5.46537	5.33662	5.272	5.99527	6.00401	5.96006	5.98455	6.0333	5.89829	5.74718	5.65677	5.79439	5.85172	5.79736	5.85138
UTR		3L	7844097	A	-	FBgn0016694					0.87103	0.11538	0	0.81334	4.43e-05	1.89e-06	0.372293	Pdp1	0.306474	4.26e-06	0.433307	0.00662408	0.17964	5.58275	5.61333	5.46335	5.46537	5.33662	5.272	5.99527	6.00401	5.96006	5.98455	6.0333	5.89829	5.74718	5.65677	5.79439	5.85172	5.79736	5.85138
UTR		3L	7812463	-	A	FBgn0016694					0.889027	0.15	0	0.814027	9.51e-05	1.09e-06	0.373045	Pdp1	0.306474	4.26e-06	0.433307	0.00662408	0.17964	5.58275	5.61333	5.46335	5.46537	5.33662	5.272	5.99527	6.00401	5.96006	5.98455	6.0333	5.89829	5.74718	5.65677	5.79439	5.85172	5.79736	5.85138
UTR		3L	7830709	T	C	FBgn0016694					1	0.13043	0.239057	0.815257	2.56e-05	0.000328728	0.0691275	Pdp1	0.306474	4.26e-06	0.433307	0.00662408	0.17964	5.58275	5.61333	5.46335	5.46537	5.33662	5.272	5.99527	6.00401	5.96006	5.98455	6.0333	5.89829	5.74718	5.65677	5.79439	5.85172	5.79736	5.85138
UTR		3L	7847161	T	A	FBgn0016694					0.900337	0.15	0	0.825337	8.68e-05	7.25e-07	0.378113	Pdp1	0.306474	4.26e-06	0.433307	0.00662408	0.17964	5.58275	5.61333	5.46335	5.46537	5.33662	5.272	5.99527	6.00401	5.96006	5.98455	6.0333	5.89829	5.74718	5.65677	5.79439	5.85172	5.79736	5.85138
UTR		3L	7845874	C	A	FBgn0016694					0.83182	0	0	0.83182	3.53e-05	3.54e-05	0.438178	Pdp1	0.306474	4.26e-06	0.433307	0.00662408	0.17964	5.58275	5.61333	5.46335	5.46537	5.33662	5.272	5.99527	6.00401	5.96006	5.98455	6.0333	5.89829	5.74718	5.65677	5.79439	5.85172	5.79736	5.85138
UTR		3L	7848960	CG	AA	FBgn0016694					0.910013	0.15385	0	0.833088	9.89e-05	1.49e-06	0.373388	Pdp1	0.306474	4.26e-06	0.433307	0.00662408	0.17964	5.58275	5.61333	5.46335	5.46537	5.33662	5.272	5.99527	6.00401	5.96006	5.98455	6.0333	5.89829	5.74718	5.65677	5.79439	5.85172	5.79736	5.85138
UTR		3L	7845744	TG	AA	FBgn0016694					0.91062	0.15385	0	0.833695	0.000146704	9.94e-06	0.373708	Pdp1	0.306474	4.26e-06	0.433307	0.00662408	0.17964	5.58275	5.61333	5.46335	5.46537	5.33662	5.272	5.99527	6.00401	5.96006	5.98455	6.0333	5.89829	5.74718	5.65677	5.79439	5.85172	5.79736	5.85138
UTR		3L	7830699	A	T	FBgn0016694					1	0.09091	0.23752	0.835785	5.65e-06	0.00041976	0.0542862	Pdp1	0.306474	4.26e-06	0.433307	0.00662408	0.17964	5.58275	5.61333	5.46335	5.46537	5.33662	5.272	5.99527	6.00401	5.96006	5.98455	6.0333	5.89829	5.74718	5.65677	5.79439	5.85172	5.79736	5.85138
UTR		3L	7843341	A	T	FBgn0016694					0.836073	0	0	0.836073	3.51e-06	3.52e-06	0.702874	Pdp1	0.306474	4.26e-06	0.433307	0.00662408	0.17964	5.58275	5.61333	5.46335	5.46537	5.33662	5.272	5.99527	6.00401	5.96006	5.98455	6.0333	5.89829	5.74718	5.65677	5.79439	5.85172	5.79736	5.85138
UTR		3L	7842604	T	C	FBgn0016694					0.938003	0.2	0	0.838003	0.000340903	1.54e-05	0.373969	Pdp1	0.306474	4.26e-06	0.433307	0.00662408	0.17964	5.58275	5.61333	5.46335	5.46537	5.33662	5.272	5.99527	6.00401	5.96006	5.98455	6.0333	5.89829	5.74718	5.65677	5.79439	5.85172	5.79736	5.85138
UTR		3L	7837561	T	G	FBgn0016694					1	0	0.322915	0.838542	2.25e-14	0.00189223	0.116731	Pdp1	0.306474	4.26e-06	0.433307	0.00662408	0.17964	5.58275	5.61333	5.46335	5.46537	5.33662	5.272	5.99527	6.00401	5.96006	5.98455	6.0333	5.89829	5.74718	5.65677	5.79439	5.85172	5.79736	5.85138
UTR		3L	7822814	T	-	FBgn0016694					0.963887	0.25	0	0.838887	0.000502803	9.88e-07	0.37627	Pdp1	0.306474	4.26e-06	0.433307	0.00662408	0.17964	5.58275	5.61333	5.46335	5.46537	5.33662	5.272	5.99527	6.00401	5.96006	5.98455	6.0333	5.89829	5.74718	5.65677	5.79439	5.85172	5.79736	5.85138
UTR		3L	7847218	C	G	FBgn0016694					0.91407	0.14286	0	0.84264	8.97e-05	3.97e-06	0.371249	Pdp1	0.306474	4.26e-06	0.433307	0.00662408	0.17964	5.58275	5.61333	5.46335	5.46537	5.33662	5.272	5.99527	6.00401	5.96006	5.98455	6.0333	5.89829	5.74718	5.65677	5.79439	5.85172	5.79736	5.85138
UTR		3L	7830586	T	G	FBgn0016694					1	0	0.31111	0.844445	8.3e-15	0.0023843	0.147468	Pdp1	0.306474	4.26e-06	0.433307	0.00662408	0.17964	5.58275	5.61333	5.46335	5.46537	5.33662	5.272	5.99527	6.00401	5.96006	5.98455	6.0333	5.89829	5.74718	5.65677	5.79439	5.85172	5.79736	5.85138
UTR		3L	7830614	A	T	FBgn0016694					1	0	0.309953	0.845023	4.71e-14	0.00509748	0.0667581	Pdp1	0.306474	4.26e-06	0.433307	0.00662408	0.17964	5.58275	5.61333	5.46335	5.46537	5.33662	5.272	5.99527	6.00401	5.96006	5.98455	6.0333	5.89829	5.74718	5.65677	5.79439	5.85172	5.79736	5.85138
UTR		3L	7848548	G	C	FBgn0016694					0.938147	0.18182	0	0.847237	0.00013681	1.98e-08	0.376965	Pdp1	0.306474	4.26e-06	0.433307	0.00662408	0.17964	5.58275	5.61333	5.46335	5.46537	5.33662	5.272	5.99527	6.00401	5.96006	5.98455	6.0333	5.89829	5.74718	5.65677	5.79439	5.85172	5.79736	5.85138
UTR		3L	7850664	G	T	FBgn0016694					0.948413	0.2	0	0.848413	0.000249641	3.33e-06	0.37558	Pdp1	0.306474	4.26e-06	0.433307	0.00662408	0.17964	5.58275	5.61333	5.46335	5.46537	5.33662	5.272	5.99527	6.00401	5.96006	5.98455	6.0333	5.89829	5.74718	5.65677	5.79439	5.85172	5.79736	5.85138
UTR		3L	7830608	A	G	FBgn0016694					1	0	0.300143	0.849928	9.05e-14	0.00336763	0.055463	Pdp1	0.306474	4.26e-06	0.433307	0.00662408	0.17964	5.58275	5.61333	5.46335	5.46537	5.33662	5.272	5.99527	6.00401	5.96006	5.98455	6.0333	5.89829	5.74718	5.65677	5.79439	5.85172	5.79736	5.85138
UTR		3L	7812408	C	T	FBgn0016694					1	0.3	0	0.85	0.000847265	1.63e-14	0.374702	Pdp1	0.306474	4.26e-06	0.433307	0.00662408	0.17964	5.58275	5.61333	5.46335	5.46537	5.33662	5.272	5.99527	6.00401	5.96006	5.98455	6.0333	5.89829	5.74718	5.65677	5.79439	5.85172	5.79736	5.85138
UTR		3L	7812405	C	T	FBgn0016694					1	0.3	0	0.85	0.000848859	1.2e-13	0.37431	Pdp1	0.306474	4.26e-06	0.433307	0.00662408	0.17964	5.58275	5.61333	5.46335	5.46537	5.33662	5.272	5.99527	6.00401	5.96006	5.98455	6.0333	5.89829	5.74718	5.65677	5.79439	5.85172	5.79736	5.85138
UTR		3L	7844105	G	C	FBgn0016694					0.915237	0.125	0	0.852737	0.000117006	2.41e-05	0.372844	Pdp1	0.306474	4.26e-06	0.433307	0.00662408	0.17964	5.58275	5.61333	5.46335	5.46537	5.33662	5.272	5.99527	6.00401	5.96006	5.98455	6.0333	5.89829	5.74718	5.65677	5.79439	5.85172	5.79736	5.85138
UTR		3L	7830606	G	A	FBgn0016694					1	0	0.294297	0.852852	9.1e-14	0.00319453	0.0577011	Pdp1	0.306474	4.26e-06	0.433307	0.00662408	0.17964	5.58275	5.61333	5.46335	5.46537	5.33662	5.272	5.99527	6.00401	5.96006	5.98455	6.0333	5.89829	5.74718	5.65677	5.79439	5.85172	5.79736	5.85138
UTR		3L	7809520	G	A	FBgn0016694					1	0.29412	0	0.85294	0.000779395	2.1e-14	0.373136	Pdp1	0.306474	4.26e-06	0.433307	0.00662408	0.17964	5.58275	5.61333	5.46335	5.46537	5.33662	5.272	5.99527	6.00401	5.96006	5.98455	6.0333	5.89829	5.74718	5.65677	5.79439	5.85172	5.79736	5.85138
UTR		3L	7827923	T	C	FBgn0016694					0.97096	0	0.235295	0.853313	3.08e-07	0.000719631	0.14051	Pdp1	0.306474	4.26e-06	0.433307	0.00662408	0.17964	5.58275	5.61333	5.46335	5.46537	5.33662	5.272	5.99527	6.00401	5.96006	5.98455	6.0333	5.89829	5.74718	5.65677	5.79439	5.85172	5.79736	5.85138
UTR		3L	7842391	C	A	FBgn0016694					0.952153	0.19048	0	0.856913	0.000205506	3.52e-06	0.37353	Pdp1	0.306474	4.26e-06	0.433307	0.00662408	0.17964	5.58275	5.61333	5.46335	5.46537	5.33662	5.272	5.99527	6.00401	5.96006	5.98455	6.0333	5.89829	5.74718	5.65677	5.79439	5.85172	5.79736	5.85138
UTR		3L	7848267	T	A	FBgn0016694					0.9258	0.13333	0	0.859135	6.45e-05	2.98e-06	0.371204	Pdp1	0.306474	4.26e-06	0.433307	0.00662408	0.17964	5.58275	5.61333	5.46335	5.46537	5.33662	5.272	5.99527	6.00401	5.96006	5.98455	6.0333	5.89829	5.74718	5.65677	5.79439	5.85172	5.79736	5.85138
UTR		3L	7850874	CG	AA	FBgn0016694					0.860497	0	0	0.860497	0.00013222	0.000132402	0.197811	Pdp1	0.306474	4.26e-06	0.433307	0.00662408	0.17964	5.58275	5.61333	5.46335	5.46537	5.33662	5.272	5.99527	6.00401	5.96006	5.98455	6.0333	5.89829	5.74718	5.65677	5.79439	5.85172	5.79736	5.85138
UTR		3L	7834561	A	T	FBgn0016694					1	0.27778	0	0.86111	0.000608887	2.83e-15	0.374389	Pdp1	0.306474	4.26e-06	0.433307	0.00662408	0.17964	5.58275	5.61333	5.46335	5.46537	5.33662	5.272	5.99527	6.00401	5.96006	5.98455	6.0333	5.89829	5.74718	5.65677	5.79439	5.85172	5.79736	5.85138
UTR		3L	7830646	G	A	FBgn0016694					0.989247	0	0.251963	0.863265	8.67e-08	0.00168188	0.0608999	Pdp1	0.306474	4.26e-06	0.433307	0.00662408	0.17964	5.58275	5.61333	5.46335	5.46537	5.33662	5.272	5.99527	6.00401	5.96006	5.98455	6.0333	5.89829	5.74718	5.65677	5.79439	5.85172	5.79736	5.85138
UTR		3L	7807427	TTTT	-	FBgn0016694					0.941713	0.15	0	0.866713	5.96e-05	2.93e-09	0.372497	Pdp1	0.306474	4.26e-06	0.433307	0.00662408	0.17964	5.58275	5.61333	5.46335	5.46537	5.33662	5.272	5.99527	6.00401	5.96006	5.98455	6.0333	5.89829	5.74718	5.65677	5.79439	5.85172	5.79736	5.85138
UTR		3L	7839101	G	A	FBgn0016694					0.90652	0.07692	0	0.86806	8.64e-05	4.73e-05	0.364008	Pdp1	0.306474	4.26e-06	0.433307	0.00662408	0.17964	5.58275	5.61333	5.46335	5.46537	5.33662	5.272	5.99527	6.00401	5.96006	5.98455	6.0333	5.89829	5.74718	5.65677	5.79439	5.85172	5.79736	5.85138
UTR		3L	7834574	T	C	FBgn0016694					1	0.26316	0	0.86842	0.000482818	2.19e-17	0.372315	Pdp1	0.306474	4.26e-06	0.433307	0.00662408	0.17964	5.58275	5.61333	5.46335	5.46537	5.33662	5.272	5.99527	6.00401	5.96006	5.98455	6.0333	5.89829	5.74718	5.65677	5.79439	5.85172	5.79736	5.85138
UTR		3L	7830589	T	A	FBgn0016694					1	0	0.2613	0.86935	5.14e-14	0.00148887	0.0514655	Pdp1	0.306474	4.26e-06	0.433307	0.00662408	0.17964	5.58275	5.61333	5.46335	5.46537	5.33662	5.272	5.99527	6.00401	5.96006	5.98455	6.0333	5.89829	5.74718	5.65677	5.79439	5.85172	5.79736	5.85138
UTR		3L	7843199	C	T	FBgn0016694					0.869373	0	0	0.869373	8.08e-05	8.07e-05	0.10018	Pdp1	0.306474	4.26e-06	0.433307	0.00662408	0.17964	5.58275	5.61333	5.46335	5.46537	5.33662	5.272	5.99527	6.00401	5.96006	5.98455	6.0333	5.89829	5.74718	5.65677	5.79439	5.85172	5.79736	5.85138
UTR		3L	7845924	-	TG	FBgn0016694					0.87212	0	0	0.87212	8.35e-05	8.34e-05	0.231533	Pdp1	0.306474	4.26e-06	0.433307	0.00662408	0.17964	5.58275	5.61333	5.46335	5.46537	5.33662	5.272	5.99527	6.00401	5.96006	5.98455	6.0333	5.89829	5.74718	5.65677	5.79439	5.85172	5.79736	5.85138
UTR		3L	7844085	T	C	FBgn0016694					0.91871	0.09091	0	0.873255	3.34e-05	7.71e-06	0.37428	Pdp1	0.306474	4.26e-06	0.433307	0.00662408	0.17964	5.58275	5.61333	5.46335	5.46537	5.33662	5.272	5.99527	6.00401	5.96006	5.98455	6.0333	5.89829	5.74718	5.65677	5.79439	5.85172	5.79736	5.85138
UTR		3L	7838821	A	G	FBgn0016694					0.87395	0	0	0.87395	0.000216601	0.000216414	0.450828	Pdp1	0.306474	4.26e-06	0.433307	0.00662408	0.17964	5.58275	5.61333	5.46335	5.46537	5.33662	5.272	5.99527	6.00401	5.96006	5.98455	6.0333	5.89829	5.74718	5.65677	5.79439	5.85172	5.79736	5.85138
UTR		3L	7859132	C	-	FBgn0016694					0.878133	0	0	0.878133	0.000135206	0.000135026	0.367832	Pdp1	0.306474	4.26e-06	0.433307	0.00662408	0.17964	5.58275	5.61333	5.46335	5.46537	5.33662	5.272	5.99527	6.00401	5.96006	5.98455	6.0333	5.89829	5.74718	5.65677	5.79439	5.85172	5.79736	5.85138
UTR		3L	7832847	T	A	FBgn0016694					1	0.23529	0	0.882355	0.000299372	1.26e-14	0.3731	Pdp1	0.306474	4.26e-06	0.433307	0.00662408	0.17964	5.58275	5.61333	5.46335	5.46537	5.33662	5.272	5.99527	6.00401	5.96006	5.98455	6.0333	5.89829	5.74718	5.65677	5.79439	5.85172	5.79736	5.85138
UTR		3L	7807828	G	C	FBgn0016694					1	0.23529	0	0.882355	0.000301492	3.37e-14	0.37281	Pdp1	0.306474	4.26e-06	0.433307	0.00662408	0.17964	5.58275	5.61333	5.46335	5.46537	5.33662	5.272	5.99527	6.00401	5.96006	5.98455	6.0333	5.89829	5.74718	5.65677	5.79439	5.85172	5.79736	5.85138
UTR		3L	7812431	A	T	FBgn0016694					1	0.23529	0	0.882355	0.000301252	1.42e-14	0.371801	Pdp1	0.306474	4.26e-06	0.433307	0.00662408	0.17964	5.58275	5.61333	5.46335	5.46537	5.33662	5.272	5.99527	6.00401	5.96006	5.98455	6.0333	5.89829	5.74718	5.65677	5.79439	5.85172	5.79736	5.85138
UTR		3L	7851001	A	G	FBgn0016694					0.930953	0.09524	0	0.883333	1.12e-05	9.14e-08	0.374275	Pdp1	0.306474	4.26e-06	0.433307	0.00662408	0.17964	5.58275	5.61333	5.46335	5.46537	5.33662	5.272	5.99527	6.00401	5.96006	5.98455	6.0333	5.89829	5.74718	5.65677	5.79439	5.85172	5.79736	5.85138
UTR		3L	7812601	T	G	FBgn0016694					1	0.23077	0	0.884615	0.000273479	4.49e-14	0.372953	Pdp1	0.306474	4.26e-06	0.433307	0.00662408	0.17964	5.58275	5.61333	5.46335	5.46537	5.33662	5.272	5.99527	6.00401	5.96006	5.98455	6.0333	5.89829	5.74718	5.65677	5.79439	5.85172	5.79736	5.85138
UTR		3L	7822540	G	T	FBgn0016694					1	0.22727	0	0.886365	0.000260411	5.33e-14	0.373025	Pdp1	0.306474	4.26e-06	0.433307	0.00662408	0.17964	5.58275	5.61333	5.46335	5.46537	5.33662	5.272	5.99527	6.00401	5.96006	5.98455	6.0333	5.89829	5.74718	5.65677	5.79439	5.85172	5.79736	5.85138
UTR		3L	7827927	T	C	FBgn0016694					1	0	0.219815	0.890092	3.85e-15	0.000386289	0.131262	Pdp1	0.306474	4.26e-06	0.433307	0.00662408	0.17964	5.58275	5.61333	5.46335	5.46537	5.33662	5.272	5.99527	6.00401	5.96006	5.98455	6.0333	5.89829	5.74718	5.65677	5.79439	5.85172	5.79736	5.85138
UTR		3L	7806654	T	A	FBgn0016694					1	0.21429	0	0.892855	0.000203358	2.57e-14	0.37645	Pdp1	0.306474	4.26e-06	0.433307	0.00662408	0.17964	5.58275	5.61333	5.46335	5.46537	5.33662	5.272	5.99527	6.00401	5.96006	5.98455	6.0333	5.89829	5.74718	5.65677	5.79439	5.85172	5.79736	5.85138
UTR		3L	7834608	A	T	FBgn0016694					1	0.21429	0	0.892855	0.000203789	1.47e-14	0.375092	Pdp1	0.306474	4.26e-06	0.433307	0.00662408	0.17964	5.58275	5.61333	5.46335	5.46537	5.33662	5.272	5.99527	6.00401	5.96006	5.98455	6.0333	5.89829	5.74718	5.65677	5.79439	5.85172	5.79736	5.85138
UTR		3L	7842865	G	A	FBgn0016694					0.895573	0	0	0.895573	8.73e-07	8.72e-07	0.680583	Pdp1	0.306474	4.26e-06	0.433307	0.00662408	0.17964	5.58275	5.61333	5.46335	5.46537	5.33662	5.272	5.99527	6.00401	5.96006	5.98455	6.0333	5.89829	5.74718	5.65677	5.79439	5.85172	5.79736	5.85138
UTR		3L	7822551	T	C	FBgn0016694					1	0.20833	0	0.895835	0.000180186	1.42e-14	0.371991	Pdp1	0.306474	4.26e-06	0.433307	0.00662408	0.17964	5.58275	5.61333	5.46335	5.46537	5.33662	5.272	5.99527	6.00401	5.96006	5.98455	6.0333	5.89829	5.74718	5.65677	5.79439	5.85172	5.79736	5.85138
UTR		3L	7842876	T	C	FBgn0016694					0.896617	0	0	0.896617	1.52e-05	1.51e-05	0.586173	Pdp1	0.306474	4.26e-06	0.433307	0.00662408	0.17964	5.58275	5.61333	5.46335	5.46537	5.33662	5.272	5.99527	6.00401	5.96006	5.98455	6.0333	5.89829	5.74718	5.65677	5.79439	5.85172	5.79736	5.85138
UTR		3L	7842878	C	G	FBgn0016694					0.898203	0	0	0.898203	1.49e-05	1.49e-05	0.111895	Pdp1	0.306474	4.26e-06	0.433307	0.00662408	0.17964	5.58275	5.61333	5.46335	5.46537	5.33662	5.272	5.99527	6.00401	5.96006	5.98455	6.0333	5.89829	5.74718	5.65677	5.79439	5.85172	5.79736	5.85138
UTR		3L	7806650	C	T	FBgn0016694					1	0.2	0	0.9	0.000149567	2.26e-14	0.375842	Pdp1	0.306474	4.26e-06	0.433307	0.00662408	0.17964	5.58275	5.61333	5.46335	5.46537	5.33662	5.272	5.99527	6.00401	5.96006	5.98455	6.0333	5.89829	5.74718	5.65677	5.79439	5.85172	5.79736	5.85138
UTR		3L	7821784	A	T	FBgn0016694					1	0.2	0	0.9	0.000152244	4.81e-15	0.374524	Pdp1	0.306474	4.26e-06	0.433307	0.00662408	0.17964	5.58275	5.61333	5.46335	5.46537	5.33662	5.272	5.99527	6.00401	5.96006	5.98455	6.0333	5.89829	5.74718	5.65677	5.79439	5.85172	5.79736	5.85138
UTR		3L	7817176	C	-	FBgn0016694					1	0.2	0	0.9	0.000149873	7.19e-15	0.373108	Pdp1	0.306474	4.26e-06	0.433307	0.00662408	0.17964	5.58275	5.61333	5.46335	5.46537	5.33662	5.272	5.99527	6.00401	5.96006	5.98455	6.0333	5.89829	5.74718	5.65677	5.79439	5.85172	5.79736	5.85138
UTR		3L	7844003	G	C	FBgn0016694					0.90347	0	0	0.90347	0.000198842	0.000198622	0.47237	Pdp1	0.306474	4.26e-06	0.433307	0.00662408	0.17964	5.58275	5.61333	5.46335	5.46537	5.33662	5.272	5.99527	6.00401	5.96006	5.98455	6.0333	5.89829	5.74718	5.65677	5.79439	5.85172	5.79736	5.85138
UTR		3L	7839734	G	T	FBgn0016694					0.905227	0	0	0.905227	5.23e-05	5.23e-05	0.823482	Pdp1	0.306474	4.26e-06	0.433307	0.00662408	0.17964	5.58275	5.61333	5.46335	5.46537	5.33662	5.272	5.99527	6.00401	5.96006	5.98455	6.0333	5.89829	5.74718	5.65677	5.79439	5.85172	5.79736	5.85138
UTR		3L	7848919	T	C	FBgn0016694					0.905687	0	0	0.905687	9.76e-07	9.75e-07	0.82605	Pdp1	0.306474	4.26e-06	0.433307	0.00662408	0.17964	5.58275	5.61333	5.46335	5.46537	5.33662	5.272	5.99527	6.00401	5.96006	5.98455	6.0333	5.89829	5.74718	5.65677	5.79439	5.85172	5.79736	5.85138
UTR		3L	7819845	G	A	FBgn0016694					0.969697	0.125	0	0.907197	5.59e-05	5.58e-06	0.376005	Pdp1	0.306474	4.26e-06	0.433307	0.00662408	0.17964	5.58275	5.61333	5.46335	5.46537	5.33662	5.272	5.99527	6.00401	5.96006	5.98455	6.0333	5.89829	5.74718	5.65677	5.79439	5.85172	5.79736	5.85138
UTR		3L	7817071	A	T	FBgn0016694					1	0.18182	0	0.90909	0.000101742	4.02e-14	0.375984	Pdp1	0.306474	4.26e-06	0.433307	0.00662408	0.17964	5.58275	5.61333	5.46335	5.46537	5.33662	5.272	5.99527	6.00401	5.96006	5.98455	6.0333	5.89829	5.74718	5.65677	5.79439	5.85172	5.79736	5.85138
UTR		3L	7838716	A	G	FBgn0016694					0.909093	0	0	0.909093	3.73e-05	3.74e-05	0.0610413	Pdp1	0.306474	4.26e-06	0.433307	0.00662408	0.17964	5.58275	5.61333	5.46335	5.46537	5.33662	5.272	5.99527	6.00401	5.96006	5.98455	6.0333	5.89829	5.74718	5.65677	5.79439	5.85172	5.79736	5.85138
UTR		3L	7821797	G	T	FBgn0016694					1	0.17391	0	0.913045	8.48e-05	2.36e-15	0.375308	Pdp1	0.306474	4.26e-06	0.433307	0.00662408	0.17964	5.58275	5.61333	5.46335	5.46537	5.33662	5.272	5.99527	6.00401	5.96006	5.98455	6.0333	5.89829	5.74718	5.65677	5.79439	5.85172	5.79736	5.85138
UTR		3L	7848525	T	A	FBgn0016694					0.914917	0	0	0.914917	1.45e-06	1.45e-06	0.305042	Pdp1	0.306474	4.26e-06	0.433307	0.00662408	0.17964	5.58275	5.61333	5.46335	5.46537	5.33662	5.272	5.99527	6.00401	5.96006	5.98455	6.0333	5.89829	5.74718	5.65677	5.79439	5.85172	5.79736	5.85138
UTR		3L	7806987	C	T	FBgn0016694					1	0.16667	0	0.916665	7.02e-05	2.54e-14	0.375296	Pdp1	0.306474	4.26e-06	0.433307	0.00662408	0.17964	5.58275	5.61333	5.46335	5.46537	5.33662	5.272	5.99527	6.00401	5.96006	5.98455	6.0333	5.89829	5.74718	5.65677	5.79439	5.85172	5.79736	5.85138
UTR		3L	7805811	G	A	FBgn0016694					1	0.16667	0	0.916665	7.08e-05	7.38e-15	0.371853	Pdp1	0.306474	4.26e-06	0.433307	0.00662408	0.17964	5.58275	5.61333	5.46335	5.46537	5.33662	5.272	5.99527	6.00401	5.96006	5.98455	6.0333	5.89829	5.74718	5.65677	5.79439	5.85172	5.79736	5.85138
UTR		3L	7815316	-	TA	FBgn0016694					0.917413	0	0	0.917413	2e-07	2e-07	0.527695	Pdp1	0.306474	4.26e-06	0.433307	0.00662408	0.17964	5.58275	5.61333	5.46335	5.46537	5.33662	5.272	5.99527	6.00401	5.96006	5.98455	6.0333	5.89829	5.74718	5.65677	5.79439	5.85172	5.79736	5.85138
UTR		3L	7844007	TA	GG	FBgn0016694					0.920633	0	0	0.920633	0.000317807	0.000317515	0.51835	Pdp1	0.306474	4.26e-06	0.433307	0.00662408	0.17964	5.58275	5.61333	5.46335	5.46537	5.33662	5.272	5.99527	6.00401	5.96006	5.98455	6.0333	5.89829	5.74718	5.65677	5.79439	5.85172	5.79736	5.85138
UTR		3L	7821640	G	T	FBgn0016694					1	0.15789	0	0.921055	5.65e-05	1.25e-13	0.376668	Pdp1	0.306474	4.26e-06	0.433307	0.00662408	0.17964	5.58275	5.61333	5.46335	5.46537	5.33662	5.272	5.99527	6.00401	5.96006	5.98455	6.0333	5.89829	5.74718	5.65677	5.79439	5.85172	5.79736	5.85138
UTR		3L	7838708	T	C	FBgn0016694					0.922077	0	0	0.922077	2.48e-05	2.47e-05	0.12884	Pdp1	0.306474	4.26e-06	0.433307	0.00662408	0.17964	5.58275	5.61333	5.46335	5.46537	5.33662	5.272	5.99527	6.00401	5.96006	5.98455	6.0333	5.89829	5.74718	5.65677	5.79439	5.85172	5.79736	5.85138
UTR		3L	7821637	G	T	FBgn0016694					1	0.15	0	0.925	4.48e-05	5.66e-15	0.375199	Pdp1	0.306474	4.26e-06	0.433307	0.00662408	0.17964	5.58275	5.61333	5.46335	5.46537	5.33662	5.272	5.99527	6.00401	5.96006	5.98455	6.0333	5.89829	5.74718	5.65677	5.79439	5.85172	5.79736	5.85138
UTR		3L	7817859	T	C	FBgn0016694					1	0.15	0	0.925	4.53e-05	3.18e-14	0.372616	Pdp1	0.306474	4.26e-06	0.433307	0.00662408	0.17964	5.58275	5.61333	5.46335	5.46537	5.33662	5.272	5.99527	6.00401	5.96006	5.98455	6.0333	5.89829	5.74718	5.65677	5.79439	5.85172	5.79736	5.85138
UTR		3L	7821386	C	T	FBgn0016694					1	0.14286	0	0.92857	3.66e-05	3.29e-14	0.375005	Pdp1	0.306474	4.26e-06	0.433307	0.00662408	0.17964	5.58275	5.61333	5.46335	5.46537	5.33662	5.272	5.99527	6.00401	5.96006	5.98455	6.0333	5.89829	5.74718	5.65677	5.79439	5.85172	5.79736	5.85138
UTR		3L	7813586	G	A	FBgn0016694					1	0.13333	0	0.933335	2.76e-05	5.89e-14	0.376864	Pdp1	0.306474	4.26e-06	0.433307	0.00662408	0.17964	5.58275	5.61333	5.46335	5.46537	5.33662	5.272	5.99527	6.00401	5.96006	5.98455	6.0333	5.89829	5.74718	5.65677	5.79439	5.85172	5.79736	5.85138
UTR		3L	7820874	T	A	FBgn0016694					1	0.13333	0	0.933335	2.81e-05	1.66e-14	0.376382	Pdp1	0.306474	4.26e-06	0.433307	0.00662408	0.17964	5.58275	5.61333	5.46335	5.46537	5.33662	5.272	5.99527	6.00401	5.96006	5.98455	6.0333	5.89829	5.74718	5.65677	5.79439	5.85172	5.79736	5.85138
UTR		3L	7810769	G	T	FBgn0016694					1	0.13333	0	0.933335	2.74e-05	9.66e-15	0.372893	Pdp1	0.306474	4.26e-06	0.433307	0.00662408	0.17964	5.58275	5.61333	5.46335	5.46537	5.33662	5.272	5.99527	6.00401	5.96006	5.98455	6.0333	5.89829	5.74718	5.65677	5.79439	5.85172	5.79736	5.85138
UTR		3L	7832921	C	G	FBgn0016694					1	0.13043	0	0.934785	2.54e-05	5.64e-14	0.373692	Pdp1	0.306474	4.26e-06	0.433307	0.00662408	0.17964	5.58275	5.61333	5.46335	5.46537	5.33662	5.272	5.99527	6.00401	5.96006	5.98455	6.0333	5.89829	5.74718	5.65677	5.79439	5.85172	5.79736	5.85138
UTR		3L	7811787	-	A	FBgn0016694					0.935713	0	0	0.935713	2.37e-05	2.37e-05	0.291418	Pdp1	0.306474	4.26e-06	0.433307	0.00662408	0.17964	5.58275	5.61333	5.46335	5.46537	5.33662	5.272	5.99527	6.00401	5.96006	5.98455	6.0333	5.89829	5.74718	5.65677	5.79439	5.85172	5.79736	5.85138
UTR		3L	7824583	A	T	FBgn0016694					1	0.125	0	0.9375	2.15e-05	6.44e-14	0.374712	Pdp1	0.306474	4.26e-06	0.433307	0.00662408	0.17964	5.58275	5.61333	5.46335	5.46537	5.33662	5.272	5.99527	6.00401	5.96006	5.98455	6.0333	5.89829	5.74718	5.65677	5.79439	5.85172	5.79736	5.85138
UTR		3L	7825226	G	T	FBgn0016694					1	0.125	0	0.9375	2.13e-05	3.18e-14	0.374406	Pdp1	0.306474	4.26e-06	0.433307	0.00662408	0.17964	5.58275	5.61333	5.46335	5.46537	5.33662	5.272	5.99527	6.00401	5.96006	5.98455	6.0333	5.89829	5.74718	5.65677	5.79439	5.85172	5.79736	5.85138
UTR		3L	7809897	AA	-	FBgn0016694					0.93779	0	0	0.93779	3.9e-06	3.9e-06	0.106219	Pdp1	0.306474	4.26e-06	0.433307	0.00662408	0.17964	5.58275	5.61333	5.46335	5.46537	5.33662	5.272	5.99527	6.00401	5.96006	5.98455	6.0333	5.89829	5.74718	5.65677	5.79439	5.85172	5.79736	5.85138
UTR		3L	7818166	A	C	FBgn0016694					0.941027	0	0	0.941027	6.41e-06	6.41e-06	0.976227	Pdp1	0.306474	4.26e-06	0.433307	0.00662408	0.17964	5.58275	5.61333	5.46335	5.46537	5.33662	5.272	5.99527	6.00401	5.96006	5.98455	6.0333	5.89829	5.74718	5.65677	5.79439	5.85172	5.79736	5.85138
UTR		3L	7812473	A	T	FBgn0016694					1	0.10526	0	0.94737	1.04e-05	1.75e-14	0.370639	Pdp1	0.306474	4.26e-06	0.433307	0.00662408	0.17964	5.58275	5.61333	5.46335	5.46537	5.33662	5.272	5.99527	6.00401	5.96006	5.98455	6.0333	5.89829	5.74718	5.65677	5.79439	5.85172	5.79736	5.85138
UTR		3L	7808388	G	A	FBgn0016694					1	0.09524	0	0.95238	6.99e-06	1.66e-14	0.379512	Pdp1	0.306474	4.26e-06	0.433307	0.00662408	0.17964	5.58275	5.61333	5.46335	5.46537	5.33662	5.272	5.99527	6.00401	5.96006	5.98455	6.0333	5.89829	5.74718	5.65677	5.79439	5.85172	5.79736	5.85138
UTR		3L	7817122	C	T	FBgn0016694					0.955863	0	0	0.955863	2.86e-06	2.85e-06	0.209004	Pdp1	0.306474	4.26e-06	0.433307	0.00662408	0.17964	5.58275	5.61333	5.46335	5.46537	5.33662	5.272	5.99527	6.00401	5.96006	5.98455	6.0333	5.89829	5.74718	5.65677	5.79439	5.85172	5.79736	5.85138
UTR		3L	7810765	A	-	FBgn0016694					0.963293	0	0	0.963293	9.06e-07	9.06e-07	0.477955	Pdp1	0.306474	4.26e-06	0.433307	0.00662408	0.17964	5.58275	5.61333	5.46335	5.46537	5.33662	5.272	5.99527	6.00401	5.96006	5.98455	6.0333	5.89829	5.74718	5.65677	5.79439	5.85172	5.79736	5.85138
UTR		3L	7819090	G	A	FBgn0016694					0.974763	0	0	0.974763	1.74e-07	1.74e-07	0.970182	Pdp1	0.306474	4.26e-06	0.433307	0.00662408	0.17964	5.58275	5.61333	5.46335	5.46537	5.33662	5.272	5.99527	6.00401	5.96006	5.98455	6.0333	5.89829	5.74718	5.65677	5.79439	5.85172	5.79736	5.85138
UTR		3L	7820725	G	A	FBgn0016694					1	0	0	1	3.94e-14	2.98e-14	0.981582	Pdp1	0.306474	4.26e-06	0.433307	0.00662408	0.17964	5.58275	5.61333	5.46335	5.46537	5.33662	5.272	5.99527	6.00401	5.96006	5.98455	6.0333	5.89829	5.74718	5.65677	5.79439	5.85172	5.79736	5.85138
UTR		3L	7822387	T	A	FBgn0016694					1	0	0	1	7.74e-14	1.65e-14	0.881807	Pdp1	0.306474	4.26e-06	0.433307	0.00662408	0.17964	5.58275	5.61333	5.46335	5.46537	5.33662	5.272	5.99527	6.00401	5.96006	5.98455	6.0333	5.89829	5.74718	5.65677	5.79439	5.85172	5.79736	5.85138
UTR		3L	7816549	A	T	FBgn0016694					1	0	0	1	2.22e-14	1.88e-14	0.832879	Pdp1	0.306474	4.26e-06	0.433307	0.00662408	0.17964	5.58275	5.61333	5.46335	5.46537	5.33662	5.272	5.99527	6.00401	5.96006	5.98455	6.0333	5.89829	5.74718	5.65677	5.79439	5.85172	5.79736	5.85138
UTR		3L	7820819	CCAAT	-	FBgn0016694					1	0	0	1	1.54e-14	9.29e-14	0.829436	Pdp1	0.306474	4.26e-06	0.433307	0.00662408	0.17964	5.58275	5.61333	5.46335	5.46537	5.33662	5.272	5.99527	6.00401	5.96006	5.98455	6.0333	5.89829	5.74718	5.65677	5.79439	5.85172	5.79736	5.85138
UTR		3L	7817158	C	T	FBgn0016694					1	0	0	1	1.82e-15	2.65e-15	0.823212	Pdp1	0.306474	4.26e-06	0.433307	0.00662408	0.17964	5.58275	5.61333	5.46335	5.46537	5.33662	5.272	5.99527	6.00401	5.96006	5.98455	6.0333	5.89829	5.74718	5.65677	5.79439	5.85172	5.79736	5.85138
UTR		3L	7825073	T	C	FBgn0016694					1	0	0	1	6.23e-15	1.82e-14	0.712792	Pdp1	0.306474	4.26e-06	0.433307	0.00662408	0.17964	5.58275	5.61333	5.46335	5.46537	5.33662	5.272	5.99527	6.00401	5.96006	5.98455	6.0333	5.89829	5.74718	5.65677	5.79439	5.85172	5.79736	5.85138
UTR		3L	7824637	C	T	FBgn0016694					1	0	0	1	2.68e-14	2.58e-14	0.689324	Pdp1	0.306474	4.26e-06	0.433307	0.00662408	0.17964	5.58275	5.61333	5.46335	5.46537	5.33662	5.272	5.99527	6.00401	5.96006	5.98455	6.0333	5.89829	5.74718	5.65677	5.79439	5.85172	5.79736	5.85138
UTR		3L	7811529	C	A	FBgn0016694					1	0	0	1	4.52e-15	4.36e-14	0.651184	Pdp1	0.306474	4.26e-06	0.433307	0.00662408	0.17964	5.58275	5.61333	5.46335	5.46537	5.33662	5.272	5.99527	6.00401	5.96006	5.98455	6.0333	5.89829	5.74718	5.65677	5.79439	5.85172	5.79736	5.85138
UTR		3L	7817137	C	G	FBgn0016694					1	0	0	1	1.23e-14	9.1e-15	0.525531	Pdp1	0.306474	4.26e-06	0.433307	0.00662408	0.17964	5.58275	5.61333	5.46335	5.46537	5.33662	5.272	5.99527	6.00401	5.96006	5.98455	6.0333	5.89829	5.74718	5.65677	5.79439	5.85172	5.79736	5.85138
UTR		3L	7806621	CTTTTTA	-	FBgn0016694					1	0	0	1	4.3e-15	3.84e-14	0.498697	Pdp1	0.306474	4.26e-06	0.433307	0.00662408	0.17964	5.58275	5.61333	5.46335	5.46537	5.33662	5.272	5.99527	6.00401	5.96006	5.98455	6.0333	5.89829	5.74718	5.65677	5.79439	5.85172	5.79736	5.85138
UTR		3L	7808787	G	A	FBgn0016694					1	0	0	1	5.28e-14	1.22e-14	0.392851	Pdp1	0.306474	4.26e-06	0.433307	0.00662408	0.17964	5.58275	5.61333	5.46335	5.46537	5.33662	5.272	5.99527	6.00401	5.96006	5.98455	6.0333	5.89829	5.74718	5.65677	5.79439	5.85172	5.79736	5.85138
UTR		3L	7822701	C	T	FBgn0016694					1	0	0	1	6.52e-14	1.62e-14	0.302303	Pdp1	0.306474	4.26e-06	0.433307	0.00662408	0.17964	5.58275	5.61333	5.46335	5.46537	5.33662	5.272	5.99527	6.00401	5.96006	5.98455	6.0333	5.89829	5.74718	5.65677	5.79439	5.85172	5.79736	5.85138
UTR		3L	7815784	T	G	FBgn0016694					1	0	0	1	2.5e-14	2.4e-16	0.295739	Pdp1	0.306474	4.26e-06	0.433307	0.00662408	0.17964	5.58275	5.61333	5.46335	5.46537	5.33662	5.272	5.99527	6.00401	5.96006	5.98455	6.0333	5.89829	5.74718	5.65677	5.79439	5.85172	5.79736	5.85138
UTR		3L	7820253	C	G	FBgn0016694					1	0	0	1	3.07e-14	1.7e-15	0.278685	Pdp1	0.306474	4.26e-06	0.433307	0.00662408	0.17964	5.58275	5.61333	5.46335	5.46537	5.33662	5.272	5.99527	6.00401	5.96006	5.98455	6.0333	5.89829	5.74718	5.65677	5.79439	5.85172	5.79736	5.85138
UTR		3L	7823107	C	T	FBgn0016694					1	0	0	1	1.16e-15	8.7e-15	0.0645139	Pdp1	0.306474	4.26e-06	0.433307	0.00662408	0.17964	5.58275	5.61333	5.46335	5.46537	5.33662	5.272	5.99527	6.00401	5.96006	5.98455	6.0333	5.89829	5.74718	5.65677	5.79439	5.85172	5.79736	5.85138

## Sheet: vri
Category	missense substitution score	Chromosome	Position	Ref	Allele	Gene_Within	Protein	Gene_Nearest	To_TSS	To_TES	B3 Freq	O1 Freq	O3 Freq	B-O freq	p_B3O1	p_B3O3	p_O1O3	gene	O ave	p-value(B3W1 vs. O1W1)	B3-O1 1WK ratio	p-value(B3W1 vs. O3W1)	B3-O3 1WK ratio	1WKB3-1	1WKB3-2	1WKB3-3	6WKB3-1	6WKB3-2	6WKB3-3	1WKO1-1	1WKO1-2	1WKO1-3	6WKO1-1	6WKO1-2	6WKO1-3	1WKO3-1	1WKO3-2	1WKO3-3	6WKO3-1	6WKO3-2	6WKO3-3
non-coding		2L	5297959	C	G			FBgn0016076	1688		0.371733	0.22291	0.17974	0.170408	0.0428322	0.000720269	0.698192	vri	0.376231	0.00320079	0.458361	0.0363493	0.2941	6.37609	6.32048	6.19172	6.58308	6.44479	6.38691	7.04891	6.52087	6.69358	6.90741	6.92845	6.88668	6.4639	6.61636	6.69032	6.78669	6.4338	6.71723
non-coding		2L	5297428	AT	GC			FBgn0016076	2219		0.3492	0.17168	0.13889	0.193915	0.0383413	0.00638467	0.461101	vri	0.376231	0.00320079	0.458361	0.0363493	0.2941	6.37609	6.32048	6.19172	6.58308	6.44479	6.38691	7.04891	6.52087	6.69358	6.90741	6.92845	6.88668	6.4639	6.61636	6.69032	6.78669	6.4338	6.71723
non-coding		2L	5296767	C	A			FBgn0016076	2880		0.412693	0.21429	0.22178	0.194658	0.0100342	0.00391417	0.118695	vri	0.376231	0.00320079	0.458361	0.0363493	0.2941	6.37609	6.32048	6.19172	6.58308	6.44479	6.38691	7.04891	6.52087	6.69358	6.90741	6.92845	6.88668	6.4639	6.61636	6.69032	6.78669	6.4338	6.71723
non-coding		2L	5298811	A	-			FBgn0016076	836		0.401213	0.16718	0.21053	0.212358	0.0132066	0.0147135	0.672488	vri	0.376231	0.00320079	0.458361	0.0363493	0.2941	6.37609	6.32048	6.19172	6.58308	6.44479	6.38691	7.04891	6.52087	6.69358	6.90741	6.92845	6.88668	6.4639	6.61636	6.69032	6.78669	6.4338	6.71723
non-coding		2L	5297453	AT	TA			FBgn0016076	2194		0.36544	0.18155	0.092105	0.228613	0.0373669	0.00409763	0.474649	vri	0.376231	0.00320079	0.458361	0.0363493	0.2941	6.37609	6.32048	6.19172	6.58308	6.44479	6.38691	7.04891	6.52087	6.69358	6.90741	6.92845	6.88668	6.4639	6.61636	6.69032	6.78669	6.4338	6.71723
non-coding		2L	5299198	A	C			FBgn0016076	449		0.387497	0.125	0.18832	0.230837	0.00410761	0.0475135	0.106167	vri	0.376231	0.00320079	0.458361	0.0363493	0.2941	6.37609	6.32048	6.19172	6.58308	6.44479	6.38691	7.04891	6.52087	6.69358	6.90741	6.92845	6.88668	6.4639	6.61636	6.69032	6.78669	6.4338	6.71723
non-coding		2L	5297457	A	C			FBgn0016076	2190		0.383333	0.17246	0.09054	0.251833	0.0189351	0.00124793	0.48888	vri	0.376231	0.00320079	0.458361	0.0363493	0.2941	6.37609	6.32048	6.19172	6.58308	6.44479	6.38691	7.04891	6.52087	6.69358	6.90741	6.92845	6.88668	6.4639	6.61636	6.69032	6.78669	6.4338	6.71723
non-coding		2L	5296988	-	GA			FBgn0016076	2659		0.95	0.711613	0.51818	0.335103	0.031074	0.0320336	0.137862	vri	0.376231	0.00320079	0.458361	0.0363493	0.2941	6.37609	6.32048	6.19172	6.58308	6.44479	6.38691	7.04891	6.52087	6.69358	6.90741	6.92845	6.88668	6.4639	6.61636	6.69032	6.78669	6.4338	6.71723
non-coding		2L	5292254	G	A			FBgn0016076	7393		0.606413	0.25	0.251083	0.355872	0.0302392	0.0295591	0.485761	vri	0.376231	0.00320079	0.458361	0.0363493	0.2941	6.37609	6.32048	6.19172	6.58308	6.44479	6.38691	7.04891	6.52087	6.69358	6.90741	6.92845	6.88668	6.4639	6.61636	6.69032	6.78669	6.4338	6.71723
non-coding		2L	5297034	C	A			FBgn0016076	2613		0.711113	0.19048	0.32559	0.453078	0.00112024	0.0230805	0.087897	vri	0.376231	0.00320079	0.458361	0.0363493	0.2941	6.37609	6.32048	6.19172	6.58308	6.44479	6.38691	7.04891	6.52087	6.69358	6.90741	6.92845	6.88668	6.4639	6.61636	6.69032	6.78669	6.4338	6.71723
UTR		2L	5302648	T	C	FBgn0016076					0	0.433307	0.329837	-0.381572	0.0145917	0.0236395	0.499577	vri	0.376231	0.00320079	0.458361	0.0363493	0.2941	6.37609	6.32048	6.19172	6.58308	6.44479	6.38691	7.04891	6.52087	6.69358	6.90741	6.92845	6.88668	6.4639	6.61636	6.69032	6.78669	6.4338	6.71723
UTR		2L	5302521	T	A	FBgn0016076					0	0.45798	0.3019	-0.37994	0.000414544	0.0328047	0.205989	vri	0.376231	0.00320079	0.458361	0.0363493	0.2941	6.37609	6.32048	6.19172	6.58308	6.44479	6.38691	7.04891	6.52087	6.69358	6.90741	6.92845	6.88668	6.4639	6.61636	6.69032	6.78669	6.4338	6.71723
UTR		2L	5302721	C	A	FBgn0016076					0.46282	0.843323	0.672223	-0.294953	0.0160787	0.0436477	0.120951	vri	0.376231	0.00320079	0.458361	0.0363493	0.2941	6.37609	6.32048	6.19172	6.58308	6.44479	6.38691	7.04891	6.52087	6.69358	6.90741	6.92845	6.88668	6.4639	6.61636	6.69032	6.78669	6.4338	6.71723
UTR		2L	5299906	T	C	FBgn0016076					0.475923	0.186815	0.2625	0.251266	0.00839079	0.0170972	0.170037	vri	0.376231	0.00320079	0.458361	0.0363493	0.2941	6.37609	6.32048	6.19172	6.58308	6.44479	6.38691	7.04891	6.52087	6.69358	6.90741	6.92845	6.88668	6.4639	6.61636	6.69032	6.78669	6.4338	6.71723
UTR		2L	5299879	C	A	FBgn0016076					0.479093	0.17361	0.272007	0.256285	0.0089538	0.0430939	0.143333	vri	0.376231	0.00320079	0.458361	0.0363493	0.2941	6.37609	6.32048	6.19172	6.58308	6.44479	6.38691	7.04891	6.52087	6.69358	6.90741	6.92845	6.88668	6.4639	6.61636	6.69032	6.78669	6.4338	6.71723
UTR		2L	5301723	G	A	FBgn0016076					0.694017	0.31015	0.367645	0.355119	0.0155208	0.0438025	0.84239	vri	0.376231	0.00320079	0.458361	0.0363493	0.2941	6.37609	6.32048	6.19172	6.58308	6.44479	6.38691	7.04891	6.52087	6.69358	6.90741	6.92845	6.88668	6.4639	6.61636	6.69032	6.78669	6.4338	6.71723
UTR		2L	5300288	A	T	FBgn0016076					0.571153	0.16516	0.265525	0.355811	0.00173062	0.0208477	0.599115	vri	0.376231	0.00320079	0.458361	0.0363493	0.2941	6.37609	6.32048	6.19172	6.58308	6.44479	6.38691	7.04891	6.52087	6.69358	6.90741	6.92845	6.88668	6.4639	6.61636	6.69032	6.78669	6.4338	6.71723
UTR		2L	5300350	T	G	FBgn0016076					0.489753	0	0.16667	0.406418	0.000413669	0.00372659	0.372203	vri	0.376231	0.00320079	0.458361	0.0363493	0.2941	6.37609	6.32048	6.19172	6.58308	6.44479	6.38691	7.04891	6.52087	6.69358	6.90741	6.92845	6.88668	6.4639	6.61636	6.69032	6.78669	6.4338	6.71723
UTR		2L	5302441	G	A	FBgn0016076					0.464427	0	0	0.464427	0.000825106	0.000826373	0.550271	vri	0.376231	0.00320079	0.458361	0.0363493	0.2941	6.37609	6.32048	6.19172	6.58308	6.44479	6.38691	7.04891	6.52087	6.69358	6.90741	6.92845	6.88668	6.4639	6.61636	6.69032	6.78669	6.4338	6.71723
UTR		2L	5307519	A	T	FBgn0016076					1	0.396825	0.472025	0.565575	0.0114829	0.0203775	0.848328	vri	0.376231	0.00320079	0.458361	0.0363493	0.2941	6.37609	6.32048	6.19172	6.58308	6.44479	6.38691	7.04891	6.52087	6.69358	6.90741	6.92845	6.88668	6.4639	6.61636	6.69032	6.78669	6.4338	6.71723
UTR		2L	5309917	G	A	FBgn0016076					1	0.281357	0.49747	0.610587	0.00719402	0.00127269	0.2362	vri	0.376231	0.00320079	0.458361	0.0363493	0.2941	6.37609	6.32048	6.19172	6.58308	6.44479	6.38691	7.04891	6.52087	6.69358	6.90741	6.92845	6.88668	6.4639	6.61636	6.69032	6.78669	6.4338	6.71723
