# Supplementary material for: Circadian gene variants and the skeletal muscle circadian clock contribute to the evolutionary divergence in longevity across Drosophila populations
Source: HighWire-hosted journal article supplement (doi:10.1101/gr.246884.118), 2019-06-27
Supplement: Supplemental_Table_S6.xlsx [file Supplemental_Table_S6.xlsx]

## Sheet: Legend
Supplemental Table S6
Circadian transcriptome data from RNA-seq of B3, O1 and O3 fly thoraces collected at 1 week of age at ZT0, 6, 12, and 18 hours.
Log2(FPKM) values are shown.

## Sheet: 24HOUR RNASEQ
gene	log2FPKM_ZT0B3A_S1	log2FPKM_ZT0B3B_S2	log2FPKM_ZT0B3C_S3	log2FPKM_ZT6B3A_S10	log2FPKM_ZT6B3B_S11	log2FPKM_ZT6B3C_S12	log2FPKM_ZT12B3A_S19	log2FPKM_ZT12B3B_S20	log2FPKM_ZT12B3C_S21	log2FPKM_ZT18B3A_S28	log2FPKM_ZT18B3B_S29	log2FPKM_ZT18B3C_S30	log2FPKM_ZT0O1A_S4	log2FPKM_ZT0O1B_S5	log2FPKM_ZT0O1C_S6	log2FPKM_ZT6O1A_S13	log2FPKM_ZT6O1B_S14	log2FPKM_ZT6O1C_S15	log2FPKM_ZT12O1A_S22	log2FPKM_ZT12O1B_S23	log2FPKM_ZT12O1C_S24	log2FPKM_ZT18O1A_S31	log2FPKM_ZT18O1B_S32	log2FPKM_ZT18O1C_S33	log2FPKM_ZT0O3A_S7	log2FPKM_ZT0O3B_S8	log2FPKM_ZT0O3C_S9	log2FPKM_ZT6O3A_S16	log2FPKM_ZT6O3B_S17	log2FPKM_ZT6O3C_S18	log2FPKM_ZT12O3A_S25	log2FPKM_ZT12O3B_S26	log2FPKM_ZT12O3C_S27	log2FPKM_ZT18O3A_S34	log2FPKM_ZT18O3B_S35	log2FPKM_ZT18O3C_S36
CG31321	3.16276	3.10906	3.04567	2.87542	2.73546	2.87764	2.18891	2.16334	2.23907	1.82084	1.82932	1.90223	3.48069	3.79896	3.54802	3.54216	3.26719	3.33676	2.57965	2.68437	2.68282	2.13892	2.28342	2.28199	3.42056	3.6287	3.3367	3.30192	3.19431	3.46033	2.92677	2.62975	2.72599	2.11498	2.47032	2.12631
CG2277	4.22328	4.14456	4.22009	4.13908	4.01659	4.09199	3.93429	3.8074	3.88576	3.86295	3.67977	3.78124	4.11932	4.17813	4.17777	4.05489	3.98774	4.11472	3.68446	3.70967	3.66246	3.72906	3.9871	4.24362	4.22611	4.18133	4.20842	4.19812	4.35926	4.24062	3.80967	3.7636	3.90006	3.68807	3.64677	3.69343
Est-6	8.71617	8.7912	8.74155	8.6407	8.66197	8.66858	8.8854	8.9203	8.85433	8.06128	8.21808	8.21998	9.06186	9.13288	9.12936	9.15216	9.17134	9.07822	8.56122	8.80161	8.73518	8.56268	8.64762	8.31743	9.02896	9.0989	8.83064	9.00186	8.727	9.01003	8.83641	8.61305	8.71926	8.46543	8.56857	8.60789
CG18302	1.50646	1.48746	1.27991	2.37112	1.93956	1.91578	3.17489	3.11957	3.23586	3.02992	3.4983	3.17153	2.49731	2.45751	1.87159	4.00172	2.95613	3.52126	3.61057	3.90366	3.90424	3.76408	3.68695	3.6646	2.48892	2.46767	2.40408	3.84525	2.97118	3.72115	4.80954	4.6894	4.6395	4.3585	4.6084	4.44404
per	2.22303	2.44951	2.44083	2.24353	1.9296	2.28655	3.33825	3.3586	3.39806	3.57151	3.85572	3.89102	2.2857	2.43807	2.25467	2.62487	2.84393	2.50091	3.74731	3.71361	3.71862	3.9962	3.89764	3.98648	2.22446	2.2162	2.19041	2.39988	2.27546	2.5316	3.5584	3.67372	3.47293	3.76583	3.93386	3.79289
CG11407	6.01017	5.97856	5.33006	5.67796	5.40192	5.06549	4.10977	3.8843	4.00847	4.77811	4.46073	4.61854	6.5098	6.86756	6.83424	7.04142	6.62751	6.29153	3.9412	4.06796	4.46553	5.24006	5.10201	5.25448	6.3838	6.39336	5.97279	6.1258	5.70246	6.13147	4.97901	4.74626	4.70443	4.86843	5.75942	5.04335
CG13283	4.26693	4.18578	4.30266	3.7732	3.3205	3.78559	3.45253	3.46085	3.39153	3.00238	2.87333	3.02707	4.59109	4.47905	4.69832	4.11596	3.95256	4.40971	3.36954	3.58406	3.58542	4.11347	4.07657	4.11614	4.52825	4.53417	4.39057	4.20326	3.92321	4.2241	3.88958	3.70845	3.74593	3.71531	3.84172	3.97547
CG17691	7.42945	7.47649	7.37848	7.51883	7.58605	7.47939	7.30892	7.27727	7.26671	7.26776	7.22013	7.16207	6.9386	7.00276	6.8068	7.01838	6.88324	6.86938	6.69316	6.78995	6.71259	6.83162	6.79894	6.70879	7.0435	7.01961	7.03866	7.00679	7.14103	7.08147	6.95552	6.84576	6.85816	6.84893	6.77584	6.84813
CG6385	3.60608	3.4953	3.44535	3.81217	3.95859	3.87066	4.32924	4.39856	4.43845	3.92102	3.98935	3.90298	2.44308	1.45041	1.798	2.28032	2.93852	2.4394	2.2012	2.61162	2.69831	2.75348	2.92794	2.3919	2.1826	2.16309	1.81375	2.04576	2.50457	2.19644	2.82612	2.87459	2.00817	2.80649	2.75071	2.84517
Jhe	4.07448	3.91574	4.06475	3.64193	3.76344	3.6769	0.88899	0.534824	0.460559	0.0484627	0.0886659	-0.188591	3.37154	3.37306	3.74647	3.10711	3.12528	2.89804	-0.342346	0.0998956	-0.0982071	-0.428392	-0.243352	-0.467768	3.66408	3.99216	3.6651	3.34009	3.55839	3.69735	0.384225	0.426052	-0.115818	-0.45772	-0.483352	-0.455041
b6	1.61053	1.2712	1.58721	0.721679	0.536702	0.56644	0.162444	0.260452	0.0915069	1.62569	1.62317	1.72222	1.24767	1.74467	1.59994	0.589444	1.02261	0.678733	0.814017	0.253265	0.458814	1.34814	1.28728	1.07583	1.54642	1.71009	1.46207	0.868539	0.812352	0.852861	0.473736	0.29174	0.392245	1.18083	1.27376	1.68549
CG13857	1.13584	0.897914	0.866221	0.27245	0.358186	-0.114822	0.410866	0.443363	0.425356	1.54611	1.59332	1.60339	0.982049	0.703647	1.15285	0.715628	0.620789	0.469154	0.213917	0.453412	0.650258	0.822428	0.860493	0.525099	0.651961	0.877941	0.957516	0.652104	0.459529	0.697687	0.891946	0.636228	0.734076	0.873385	1.35101	1.28952
CG17278	4.79441	4.84013	4.82705	5.28009	5.23877	5.3044	4.99859	5.01955	5.10802	4.56917	4.38827	4.74755	5.36975	5.56607	5.58075	6.15839	5.63334	5.82649	4.81494	5.09885	5.07386	4.82727	4.71861	4.76606	5.61131	5.63389	5.53826	6.23632	6.00591	6.42495	5.76148	5.51096	5.56208	5.19213	5.40704	5.26372
CG8180	3.70972	3.706	3.72957	3.87738	3.7803	3.89657	4.09863	4.05048	4.06693	3.59636	3.51508	3.74814	3.92646	3.88221	3.91768	4.09326	4.17306	4.08346	4.07391	4.12634	4.11464	3.85312	3.83649	3.63244	3.74391	3.78524	3.73998	4.11755	3.98383	4.16039	4.17866	4.16698	4.06497	3.68948	3.88943	3.7076
Rcd5	4.86473	4.82604	4.80263	5.07038	5.07076	4.97307	4.96532	4.95359	4.86759	5.16906	5.06683	5.10983	4.91938	5.06833	4.89986	4.97591	4.81904	5.05982	5.03514	4.9774	4.91735	5.04311	4.93182	4.99406	4.69517	4.67921	4.67142	4.95582	5.06376	4.91912	4.73141	4.82352	4.68698	4.67087	4.72338	4.62356
cry	6.54227	6.55826	6.59416	6.72292	6.72516	6.74169	6.30747	6.50385	6.29606	5.19945	5.4379	5.47143	6.70245	6.75777	6.61443	6.81922	7.13047	6.79538	5.83212	6.00605	6.04483	4.92569	4.91302	4.89915	6.65111	6.63749	6.59385	6.86171	6.83637	6.80736	6.36844	6.40462	6.3336	5.06333	5.24231	5.15913
Dbp80	4.58646	4.56994	4.60991	4.82215	4.84581	4.87247	4.66101	4.69521	4.76067	4.8562	4.78522	4.89644	4.45412	4.46731	4.53426	4.69513	4.33579	4.64885	4.46839	4.61325	4.53655	4.58127	4.55324	4.65393	4.52015	4.55044	4.44986	4.70134	4.72203	4.76018	4.74136	4.66554	4.62953	4.70067	4.5988	4.77829
CG14855	0.629975	0.887736	0.579401	0.570641	0.614132	0.828688	0.959413	1.13647	1.0503	2.07595	1.80363	2.00945	0.559255	0.715027	0.84698	0.97647	0.61967	0.786045	1.38354	1.0681	1.10627	0.972535	1.08364	1.02046	0.556361	0.74072	0.856754	0.941139	0.947374	0.929009	1.42855	1.0997	1.11864	1.04022	0.790344	1.03305
CG3902	8.51662	8.46923	8.53589	8.0021	8.14966	7.97986	7.71303	7.9378	7.77726	7.9125	8.06074	7.83466	8.29286	8.3221	8.10694	8.16551	8.00997	8.12351	7.45897	7.62204	7.68046	7.53351	7.5746	7.54735	8.29112	8.34492	8.33674	8.20667	8.33836	8.37848	7.70421	7.71361	7.73198	7.68435	7.89449	7.74093
CG9143	2.20372	2.31692	2.25121	2.4438	2.49784	2.51308	2.26283	2.3625	2.2994	2.58299	2.54504	2.54788	2.30274	2.42173	2.35185	2.36844	2.63635	2.20037	2.38435	2.21715	2.25353	2.46132	2.52881	2.42307	2.24804	2.34532	2.32101	2.56293	2.47845	2.4333	2.21067	2.26382	2.33012	2.47742	2.53666	2.46152
CG8170	0.360997	0.274796	0.154086	-0.625282	-0.717495	-0.674687	-0.963168	-0.933756	-0.927107	-0.907609	-0.714079	-0.660562	0.989057	1.42884	1.37015	0.00808662	0.0790844	0.0761056	-0.927903	-0.894199	-0.82438	-0.0545113	-0.120286	-0.185417	1.42251	1.66173	1.50578	0.0322637	-0.0676425	0.180108	-0.764666	-0.69959	-0.837019	0.237636	0.120234	0.166991
sxe2	5.42973	5.35245	4.96776	5.21671	5.51072	4.92463	4.69997	4.36864	4.54592	4.18702	3.92857	4.06922	6.02713	6.3892	6.42146	7.22485	6.35626	6.42599	4.71952	5.09974	5.49345	4.32087	3.98795	4.50958	6.28674	6.26791	5.86076	7.05721	6.59927	6.90292	6.60152	6.55806	6.30671	4.18406	5.51216	4.26898
Pdh	2.58971	3.08784	2.75958	0.593156	1.10911	-0.014542	-0.35135	-0.668992	-0.785881	1.34585	0.734178	0.174648	3.97332	4.31962	4.09387	2.34672	3.06315	2.54571	0.903898	0.75341	1.06943	1.7609	1.93242	2.12777	3.8479	4.00774	3.38231	2.12721	2.33422	2.42906	0.943651	1.03121	0.873534	1.79788	1.62566	1.36549
CG40198	3.68628	3.76137	3.90401	3.01982	3.31997	3.17211	2.87509	3.08743	2.9029	3.62303	3.45324	3.59856	4.66062	4.71734	4.59546	4.24368	3.64522	4.53932	4.43939	4.56723	4.46144	5.01209	5.11037	4.78489	4.53028	4.54757	4.61424	4.2447	4.37236	4.12907	4.20597	3.84063	4.27318	4.93076	4.68759	4.46361
CG7402	2.5166	2.21387	2.09602	2.85869	2.72434	2.35885	1.90633	2.22957	2.19679	1.32005	1.30942	1.50391	2.96596	3.05592	3.25146	4.05863	3.85956	3.52892	2.50677	2.69673	2.6272	2.46991	2.18624	2.26993	2.94587	3.08302	2.77421	3.8872	3.57877	3.88877	3.48389	3.33417	3.07351	2.17802	2.59619	2.43872
Cyp18a1	2.54489	2.7451	2.83801	2.42111	2.64529	2.55631	3.55953	3.42434	3.49721	3.37671	3.21507	3.4483	3.28965	3.53197	3.35567	2.94188	3.3536	3.1122	3.87339	4.04347	3.89998	4.19722	4.1608	3.79965	3.06889	3.08177	3.0664	2.78226	2.63515	2.8836	3.75772	3.83898	3.76995	3.98945	3.92792	3.81984
PyK	9.51107	9.42488	9.48395	9.22651	9.25696	9.10523	9.40294	9.37921	9.34144	9.01904	9.04747	9.11771	10.1625	9.96591	10.0649	9.82049	10.1697	9.80189	10.1602	9.91785	10.0543	10.0152	9.94277	9.75607	10.064	10.1045	10.135	9.93902	10.0702	10.0369	9.88635	9.88171	9.94711	9.84009	9.71478	9.68219
fon	7.95727	7.82129	8.05975	7.40296	7.41018	7.44494	7.21771	7.45098	7.21766	7.35195	7.35018	7.39833	7.16356	6.81699	7.04607	6.50051	6.88876	6.59844	6.41465	6.43203	6.43552	6.61997	6.57265	6.54755	7.43121	7.42085	7.3101	6.92617	7.11648	7.03608	7.00216	7.11943	6.90714	6.77553	6.82771	6.97371
Sclp	5.03721	5.02919	5.16282	5.54687	5.75456	5.51441	5.18967	5.19973	5.07402	5.52667	5.80495	5.6121	4.21781	4.34463	4.12957	4.25062	4.03887	4.48106	4.15006	4.43642	4.23297	4.09597	4.06094	3.86335	4.04566	3.9802	3.81657	4.02147	4.38837	4.10955	3.97474	3.84035	3.7642	3.73228	3.77183	4.03356
TwdlT	3.07047	2.89067	3.06614	2.65849	2.81063	2.59394	1.80923	1.99225	2.18947	2.24563	2.00167	1.92159	0.922873	1.29434	0.723191	1.04539	0.835885	0.850718	-0.276458	0.22772	0.133386	0.318518	0.0803803	0.071806	1.01355	1.24558	0.823935	0.720834	1.08228	1.00197	0.269744	0.458567	0.121053	0.240697	0.41408	0.163659
Ugt86De	0.696286	0.644918	0.68374	0.0891964	0.0735859	0.191765	-0.654538	-0.565798	-0.63209	-0.301533	0.00628918	-0.463388	1.16178	1.51008	1.43771	0.806616	0.737484	1.06693	-0.542247	0.165405	-0.00354198	0.87032	0.679981	0.63259	2.826	3.03494	2.90275	2.17235	2.16646	2.10674	1.05393	1.09068	1.25871	1.79524	1.71633	2.056
Cyp4c3	-0.569802	-0.659844	-0.577363	-0.175009	-0.228368	-0.3635	-0.391978	-0.547199	-0.534046	-0.127909	-0.195286	-0.365966	-0.327452	-0.505982	-0.237307	-0.0879967	-0.0884173	-0.334649	-0.388591	-0.195672	-0.328686	-0.167182	-0.207255	-0.07925	-0.3481	-0.0808796	-0.341772	-0.200165	-0.292244	-0.161663	-0.0678176	-0.138116	-0.0348608	-0.277708	-0.428841	-0.40519
Nep5	1.56752	1.56952	1.39189	0.835344	0.305678	0.633042	0.748022	0.942329	0.877206	1.54026	1.38236	1.35501	1.53521	1.73175	2.12922	1.14073	1.27208	1.01914	1.51293	1.40122	1.33558	1.56067	2.1982	1.6787	1.99046	2.19294	1.94691	1.23051	1.19503	1.25133	1.5313	1.37279	1.64345	1.66657	1.60893	1.58747
CG8306	5.92707	6.01949	5.92942	6.04111	6.08119	5.92535	6.08733	6.17096	6.19289	6.43105	6.3226	6.45074	6.06276	6.16694	6.13423	6.39677	6.3935	6.24188	6.43147	6.54614	6.47591	6.40662	6.36969	6.34374	5.94134	5.98039	5.90149	6.43582	6.28284	6.41495	6.81121	6.76531	6.68994	6.51502	6.74446	6.53172
CG1908	3.74617	3.76592	3.85502	3.88623	3.84191	3.94677	3.92175	3.89458	3.99976	3.8845	3.88356	4.08938	4.40228	4.4238	4.23064	4.43821	4.46914	4.3927	4.45728	4.4179	4.39608	4.39659	4.35646	4.42315	4.24926	4.2058	4.18356	4.34291	4.3465	4.39616	4.26589	4.27257	4.22216	4.09059	4.1402	4.21311
CG14528	5.83504	5.62988	5.72094	4.63595	4.69518	4.68689	4.43347	4.54972	4.6476	5.52822	5.52621	5.42876	6.01318	5.74077	5.91357	4.97066	5.09031	5.04966	4.87032	5.12911	5.06017	5.9219	5.96199	5.92089	6.51437	6.43525	6.1685	5.30633	5.36497	5.28774	5.1655	5.19259	5.18075	6.16053	6.21536	6.38842
CG42329	3.66926	4.1656	3.6329	3.09161	1.94328	3.14761	1.22603	0.705382	1.14813	0.726078	0.883761	1.51239	4.14746	5.27565	5.08263	3.78061	4.10951	4.2071	1.88793	2.34687	1.96467	2.05528	2.31805	2.39009	4.0529	3.5221	3.496	3.30625	2.96694	2.83067	1.40295	0.977483	1.9125	1.62469	2.16319	1.58546
blw	10.4187	10.332	10.3371	10.1295	10.1078	9.98091	10.2652	10.1918	10.2697	10.0511	10.0365	10.0921	10.9815	10.7662	10.8597	10.5159	10.8884	10.512	10.9345	10.666	10.7764	10.7878	10.6716	10.4817	10.9494	11.0263	11.0676	10.7324	10.8016	10.8389	10.6574	10.6987	10.7831	10.8054	10.6349	10.5904
CG9512	8.53581	8.50608	8.56764	8.42649	8.31104	8.15712	8.25169	8.23089	8.23866	7.73429	7.7711	7.74989	8.99815	9.15614	8.9696	9.08074	9.34414	9.01689	8.78269	8.95124	8.88773	8.19098	8.47992	8.12728	9.05622	9.18583	9.02607	9.24993	9.03157	9.19804	9.37741	9.02883	9.19922	8.59084	8.66481	8.64883
Dat	6.9326	7.04586	7.01606	6.86409	7.05669	6.97537	7.25572	7.24601	7.25379	6.62515	6.47709	6.53987	6.91226	7.13122	7.04409	6.98362	7.18875	6.93638	6.96003	7.21465	7.09703	6.7091	6.76036	6.79042	6.90057	6.94598	6.81657	7.00334	7.08686	7.20414	7.16799	7.07174	7.21771	6.92093	6.81102	6.75471
Mal-A8	5.71937	5.71904	5.86267	6.16141	6.3975	6.45846	5.76657	5.82461	5.61782	7.93255	7.47475	7.00761	6.47564	6.6413	5.70055	6.70828	6.76769	6.95729	6.67102	7.0507	6.88524	6.33618	7.05015	7.18715	5.39511	4.78437	5.19533	6.28689	6.48226	6.31933	6.3334	6.66647	6.65972	6.63147	6.31217	6.21473
Cyp305a1	5.24382	5.11716	5.27045	5.32122	5.58101	5.1411	5.10638	4.89296	5.03348	4.38138	4.21741	4.36311	5.74558	5.97789	5.92072	6.13842	6.28114	6.07926	5.35741	5.34763	5.39028	5.11596	5.07996	4.96994	5.67508	5.65721	5.61069	5.91767	5.97341	6.05281	5.61498	5.46534	5.55546	4.88906	4.96857	4.8341
CG42566	2.13792	1.39235	1.28584	2.9336	2.91321	2.46091	1.28289	0.861827	0.89695	2.71643	2.04914	2.22317	2.25373	2.89347	2.66023	3.87535	2.30336	3.01355	0.174465	0.84416	2.09777	1.85002	1.64003	2.20663	1.83249	2.03981	1.75352	3.12411	2.60974	3.14052	3.29482	3.21129	2.70939	1.35098	2.60692	1.29943
CG14880	3.82587	3.71368	3.78188	4.03489	3.72922	4.0586	5.08626	5.01008	5.01984	4.08696	4.28151	4.31361	3.62135	3.97457	3.8701	4.07796	3.7853	4.00536	4.87958	5.0771	4.87095	3.89482	3.8411	3.83815	3.8491	3.96568	3.75733	4.30364	3.8206	4.33763	5.19756	5.2021	5.13301	4.14573	4.26267	4.0566
CG32112	4.82846	4.84777	4.94115	4.9497	4.96777	5.03643	4.89891	4.88695	4.97096	5.04684	5.0187	5.03886	5.07582	5.098	5.05695	5.01162	4.86747	5.04791	5.10193	5.12904	5.1104	5.30972	5.27874	5.29401	5.07625	5.07473	5.0222	5.00424	5.08087	5.10427	5.15317	5.06829	4.9192	5.23158	5.12641	5.29323
CG13397	2.81814	2.78894	2.78557	2.56363	2.44136	2.63835	2.80201	2.84427	2.92168	2.50172	2.52791	2.62566	2.89344	3.08975	2.99399	2.54776	2.73261	2.77124	2.88942	3.24402	3.24415	2.79649	2.97849	3.16131	3.11006	3.06585	2.9631	2.76176	2.80488	2.84961	3.3117	3.39515	3.33597	3.18675	3.358	3.46347
CG34056	2.83349	2.7528	2.86126	3.27093	3.36876	3.27885	3.09231	3.27622	3.18376	3.23034	3.25668	3.22761	3.07736	3.0778	3.21029	3.64294	3.58001	3.41589	3.19277	3.23887	3.29993	3.10415	3.00253	2.99914	3.19899	3.15743	3.20867	3.61751	3.6324	3.70256	3.65801	3.64518	3.59492	3.33756	3.41004	3.42605
CG33052	2.93139	3.03049	2.91958	3.17017	3.26412	3.21404	3.12628	3.1213	3.05764	3.3675	3.24563	3.29043	3.4729	3.58905	3.40486	3.62323	3.65584	3.7267	3.5346	3.54681	3.52875	3.62598	3.57155	3.57106	3.52156	3.45824	3.36315	3.50707	3.64731	3.6633	3.46586	3.47135	3.42762	3.44909	3.62474	3.62368
Mipp1	6.72138	7.03411	6.96987	6.29849	6.24635	6.22025	6.28092	6.45858	6.38938	7.4428	7.34186	7.05082	7.385	7.43861	7.11717	7.03729	6.82024	6.84964	7.1933	7.26609	7.24837	7.6585	8.06328	7.80761	6.74275	6.67343	6.70543	6.57363	6.45253	6.58816	6.48282	6.42665	6.4408	6.59401	6.74188	6.53447
yuri	2.5056	2.30753	2.56604	2.76616	2.61869	2.82633	2.35345	2.41276	2.44525	3.16539	2.8951	2.99036	2.65656	2.80288	2.54283	2.78105	2.78861	2.68733	2.51173	2.61563	2.59404	2.43198	3.18823	3.44095	2.54917	2.57945	2.57657	2.8036	3.09635	2.86253	2.6036	2.61053	2.82031	2.45947	2.67714	2.54278
CG13607	5.84874	5.76934	5.89311	5.8546	5.54067	5.94755	6.15808	5.99504	6.22078	5.65556	5.37919	5.53522	5.93735	6.18207	5.98023	5.93795	6.00693	6.02004	6.25226	6.31693	6.25708	5.93386	6.00805	6.05506	6.31847	6.27018	6.29848	6.24678	6.14934	6.18528	6.4117	6.58551	6.58209	6.16116	6.1686	6.23026
ana	1.8716	2.07462	2.03447	1.89149	1.88904	2.23261	2.73563	2.62441	2.64228	2.17478	2.3491	2.29919	2.23698	2.17715	2.29474	2.07794	1.7383	1.99895	2.64408	2.48265	2.54262	2.78067	2.93744	2.53045	2.12014	2.21579	2.20479	2.3442	2.2203	2.42964	2.52605	2.41909	2.55127	2.63674	2.59759	2.6108
CG7781	5.62411	5.70859	5.6285	5.78325	5.77954	5.82441	5.84376	5.87577	5.9349	5.55765	5.57593	5.61188	5.9209	5.88071	5.97663	6.05539	5.76733	5.96109	6.1063	6.06943	6.08854	6.08334	5.97042	5.90621	6.01516	5.99157	5.93413	6.03097	5.94389	6.10439	6.18539	6.04334	6.1684	6.12635	6.00083	6.11006
CG9363	4.87936	4.8462	4.87525	4.77091	4.95094	4.48584	3.60746	3.74199	3.5426	3.79931	3.60613	3.84997	4.61078	4.79632	4.74659	4.93667	4.46913	4.72474	2.99843	3.26889	3.29092	3.82102	3.84416	3.71653	4.98001	5.01212	4.94268	5.14787	5.23692	5.24498	3.95899	3.72206	3.85869	4.077	4.40116	4.31039
CG1275	5.77454	5.66857	5.80652	6.03296	5.91035	5.90312	6.14314	5.97475	5.99451	5.80761	5.68221	5.77489	5.92727	5.94585	5.98873	6.11008	5.73968	6.10875	6.08649	6.16036	6.08169	5.83237	5.8974	5.78948	5.92738	6.00103	5.97631	6.16456	6.11207	6.29908	6.21406	6.0865	6.2155	5.97254	6.01409	5.98859
CG5792	3.78925	3.68813	3.72318	3.87611	3.74967	3.84559	3.81823	3.74113	3.77061	3.87225	3.8133	3.81986	3.85488	3.7402	3.79411	3.86827	3.78801	3.95999	3.81382	3.8868	3.84378	3.88909	3.90357	3.97448	4.06746	4.03022	3.97046	3.97053	4.03849	4.06727	4.10446	4.00471	4.02931	4.14762	4.01057	4.18502
Caf1	4.02841	4.06389	4.04893	4.26545	4.16746	4.21911	4.09058	4.14	4.09231	4.30324	4.3615	4.20351	4.20558	4.22902	4.10452	4.18163	4.19728	4.17878	4.09957	4.12065	4.19569	4.3764	4.35998	4.33534	4.24339	4.27197	4.31746	4.45829	4.43799	4.40851	4.24512	4.30418	4.29159	4.24397	4.3861	4.40868
CG32091	4.24739	4.12846	4.3101	3.9216	3.56222	3.95882	3.90952	3.88025	3.98693	4.1593	4.0959	4.39689	4.02273	4.26847	4.41294	4.05206	3.78837	3.91286	3.91208	4.04044	3.8943	4.09943	4.1371	4.07727	4.52914	4.82323	4.34815	4.33408	3.64878	4.27112	4.39272	4.31252	4.40146	4.49584	4.7387	4.52346
CG11951	4.32432	3.99375	4.16175	4.35553	3.86871	4.02992	3.70518	3.64347	3.7548	2.61256	2.95991	3.06706	4.15987	4.36907	4.33113	4.58395	4.35301	4.22348	3.34432	3.52455	3.57147	2.51039	2.47869	2.59259	4.09071	4.30375	4.12606	4.49491	3.92281	4.32211	4.0716	3.89829	3.92721	2.60848	2.95378	2.61735
Cyt-b5-r	9.4119	9.39927	9.60375	8.86504	9.0265	9.03724	8.68544	8.88783	8.73227	8.80293	8.93068	8.98126	9.42045	9.36132	9.27408	8.8838	8.40402	9.01774	8.58174	8.91751	8.89631	8.51333	8.70848	8.23702	9.50157	9.50564	9.42879	9.08271	9.24197	9.13694	9.03011	9.10345	9.10522	8.69004	8.90507	8.92002
CG4950	4.13222	4.08176	4.12848	4.48974	4.49289	4.52441	4.51582	4.51945	4.58313	3.67399	3.4689	3.90386	3.9392	4.31839	4.31279	4.70452	4.48267	4.7018	4.4149	4.49029	4.13127	3.60003	3.65738	3.60587	4.38814	4.48156	4.49809	4.69092	4.38964	4.57071	4.73771	4.49391	4.70429	4.17205	4.14335	3.88801
CG4404	5.73956	5.63211	5.73538	5.83107	5.87748	5.78995	5.52046	5.47274	5.50826	5.72846	5.69909	5.67267	5.67584	5.79208	5.66268	5.73019	5.71127	5.77141	5.48753	5.50507	5.53236	5.61382	5.45314	5.39966	5.5982	5.58388	5.53485	5.60643	5.71417	5.73671	5.46493	5.4927	5.48933	5.38229	5.46227	5.41281
ssp	3.50539	3.5169	3.56536	3.79813	3.86658	3.7288	3.59553	3.66926	3.52274	3.86813	3.82922	3.75835	3.65349	3.58135	3.53525	3.7728	3.82598	3.66708	3.72694	3.69243	3.66406	3.65006	3.86105	3.91703	3.50938	3.69649	3.58327	3.76588	4.02142	3.76859	3.7033	3.49055	3.61985	3.68201	3.49831	3.82478
CG1640	7.14094	7.13353	7.1612	6.87014	6.79975	6.83335	6.92379	6.97394	6.96504	6.74266	6.81421	6.81039	7.13728	7.07475	7.03214	7.03227	7.06368	7.02137	6.89707	6.87499	6.98031	6.90164	6.88573	6.82857	7.09879	7.10391	7.09872	7.04388	7.03377	7.14675	7.0244	7.08459	7.07381	6.96285	7.02571	6.99232
Rtnl1	6.68158	6.62141	6.70795	6.80877	6.74905	6.857	6.62214	6.64388	6.63566	6.67256	6.61008	6.69369	6.83058	6.82289	6.8157	6.8745	6.56644	6.88153	6.78662	6.7837	6.78069	6.67399	6.63218	6.59662	6.65773	6.66976	6.67803	6.78793	6.77641	6.88213	6.79965	6.66608	6.77029	6.61268	6.54769	6.6089
CG9886	4.32687	4.37141	4.38924	3.84526	3.70999	3.95338	3.86319	3.82582	3.81579	4.31799	4.31059	4.33705	4.43284	4.32351	4.12067	3.862	3.90915	3.8844	3.71998	3.86944	3.95406	4.26393	4.3517	4.29094	4.46134	4.22025	4.34195	3.81631	3.92614	3.93465	3.83283	3.86574	4.00575	4.39465	4.51673	4.46499
CG5498	4.82702	4.76763	4.7553	5.20179	5.37686	5.29961	4.929	4.85166	4.78584	5.16819	5.17193	5.08427	4.83862	4.76649	4.70046	5.02921	5.04043	5.11023	4.77939	4.93399	4.90639	4.82816	4.93887	4.9942	4.60345	4.70533	4.59107	4.68335	4.99371	4.90339	4.78171	4.59825	4.67265	4.7509	4.66867	4.77864
nompA	0.76319	0.333681	0.113521	1.5946	1.08162	1.13879	0.454558	0.0441393	0.50306	0.804805	0.373191	0.791599	0.5867	0.767454	1.11134	2.21126	1.90477	1.36709	-0.329244	-0.45232	0.657383	0.379874	0.336597	0.505367	0.385171	0.612029	0.490874	1.44478	0.777386	1.43039	1.75396	1.66313	1.325	0.149124	1.14752	0.0366532
Saf6	2.06579	1.90492	2.03761	2.23718	2.0755	2.26846	2.09119	1.98823	2.11713	2.25722	2.22914	2.32121	2.20429	2.3735	2.41983	2.28229	2.45854	2.33445	2.25392	2.33394	2.24579	2.54934	2.40569	2.54558	2.25229	2.24275	2.0756	2.25428	2.31395	2.37955	2.11377	2.31621	2.12894	2.21484	2.44921	2.41046
Hel25E	4.66816	4.67552	4.68704	4.96412	5.0173	4.962	4.72193	4.79248	4.77986	5.33619	5.04592	5.03752	4.70947	4.86791	4.70079	4.83731	4.82873	4.73283	4.67805	4.81058	4.7556	4.87285	4.89803	4.90796	4.72554	4.74401	4.65763	4.89452	5.08069	4.99913	4.80677	4.80577	4.79789	4.92187	4.99822	4.96377
CG7227	0.786441	1.28188	1.35248	2.01674	2.24554	2.63785	2.90999	2.6284	2.83336	1.95085	1.99254	1.96944	2.51261	2.2905	2.30355	2.99298	3.31798	2.91164	3.02306	2.94304	3.10736	2.55012	2.642	2.56601	1.57398	2.11991	1.8546	2.84156	2.73743	2.83878	2.59657	2.11508	2.54765	2.49981	2.01849	2.36365
CG42709	3.42205	3.54939	3.45456	3.25852	3.07004	3.40571	3.32426	3.36628	3.35051	3.74425	3.70179	3.73805	3.26765	3.19478	3.21284	3.40013	2.96118	3.33185	3.36006	3.47047	3.38527	3.59733	3.60098	3.71426	3.20138	3.11526	3.18761	3.3511	3.29056	3.42712	3.43574	3.33106	3.49561	3.69879	3.73218	3.69034
CG30431	4.65066	4.57121	4.70835	4.61221	4.43557	4.79799	5.02929	4.96945	5.19374	4.36109	4.34538	4.44597	4.44637	4.46609	4.40597	4.71594	4.5499	4.59128	4.76482	4.87615	4.74541	4.2143	4.39255	4.57403	4.24126	4.25008	4.06929	4.42518	4.3091	4.4765	4.70142	4.87673	4.86035	4.39651	4.61201	4.64289
Art7	2.5798	2.63839	2.77652	2.84052	2.97419	3.10367	2.86509	2.83498	2.91112	3.08889	3.02986	3.08569	2.89449	2.93796	2.77123	2.81482	3.16438	2.84135	2.73626	2.84478	2.91383	2.9379	2.86544	3.05069	2.54875	2.61301	2.55924	2.66053	2.84843	2.82517	2.60706	2.72392	2.63401	2.69488	2.7248	2.77558
CG5316	4.14601	4.11072	4.13542	4.31569	4.32082	4.31132	4.10873	4.06899	4.06882	4.36122	4.20466	4.2569	3.97237	3.97996	3.98398	4.08695	3.62449	4.08874	3.93324	4.00192	3.94288	4.06606	4.1681	4.28751	4.04955	4.18044	4.02619	4.14655	4.09569	4.1186	4.07333	3.99659	3.9085	4.12485	4.06868	4.1777
CG11696	2.33847	2.35759	2.39926	2.51838	2.46185	2.58411	2.40004	2.42017	2.49604	2.46434	2.55115	2.58119	2.40395	2.4427	2.31796	2.55131	2.56319	2.37837	2.51259	2.51408	2.44946	2.43622	2.48006	2.63537	2.24723	2.34147	2.29761	2.32915	2.55985	2.39404	2.38822	2.5703	2.43239	2.40982	2.50979	2.58201
CG8939	3.13829	3.24897	3.3889	3.44975	3.48504	3.47405	3.34137	3.37836	3.36767	3.57544	3.63368	3.64765	3.1276	3.27189	3.09838	3.18016	3.72814	3.24927	3.04852	3.17749	3.0493	3.19107	3.28128	3.49478	3.21322	3.31514	3.3276	3.33312	3.50583	3.409	3.12587	3.14834	3.17013	3.25931	3.421	3.31372
Tps1	8.64327	8.61422	8.87888	8.52548	8.56885	8.57789	8.25595	8.31271	8.36548	8.95603	8.86374	8.95658	8.30563	8.3393	8.09002	7.74618	8.04562	8.0215	8.09849	8.28479	8.23229	7.95663	8.34034	8.07744	8.34988	8.32516	8.49476	7.94068	8.12337	8.01387	8.28165	8.43178	8.58157	8.36793	8.52751	8.50056
CG10747	4.56524	4.52215	4.49574	4.79695	4.76887	4.72593	4.52487	4.48342	4.58884	4.67257	4.63259	4.69188	4.54581	4.47029	4.47749	4.6334	4.50617	4.63657	4.39825	4.47913	4.50623	4.42774	4.50729	4.50832	4.42762	4.35118	4.29578	4.53984	4.65687	4.73309	4.55554	4.44592	4.44818	4.42821	4.42348	4.57614
Ect3	3.81939	3.87734	4.0192	4.03786	4.06417	4.33714	4.40016	4.59135	4.5081	4.40156	4.61249	4.71246	4.12806	3.65959	3.76645	4.18981	4.13335	4.33773	4.21907	4.46048	4.94814	4.03631	4.30136	4.05563	3.73017	3.60272	3.48068	3.84605	3.90842	3.96025	4.38894	4.62604	4.22745	3.96754	4.11628	4.19403
CG11073	6.53086	6.49545	6.6103	6.79897	6.86759	6.73517	6.84674	6.8085	6.91858	6.44711	6.35067	6.47342	6.25683	6.43477	6.41203	6.63431	6.42321	6.61763	6.38637	6.55374	6.39008	5.93854	5.78017	5.7537	6.17	6.24417	6.18877	6.57593	6.48353	6.6834	6.63601	6.66904	6.54509	5.90573	6.08989	5.8705
CG31326	6.52885	6.52421	6.64279	6.27363	6.52482	6.30441	5.77818	5.91042	5.7845	5.87249	5.80248	5.76293	6.32741	6.33397	6.20477	5.88953	5.93555	6.05263	5.27914	5.54384	5.5519	5.24396	5.45274	5.35976	6.18944	6.19604	6.15525	6.02974	6.04106	6.11327	5.55126	5.63854	5.53916	5.47219	5.58689	5.48979
CG7967	5.64225	5.62968	5.72851	5.86774	5.88531	5.93785	5.62315	5.63615	5.68369	5.93798	5.78876	6.01191	5.3735	5.53857	5.3395	5.49998	5.24787	5.35678	5.2177	5.27919	5.41896	5.47155	5.45972	5.47617	5.34918	5.37753	5.24095	5.54815	5.57865	5.63617	5.43524	5.49194	5.41814	5.42193	5.56327	5.44071
Argk	10.0548	10.065	10.0248	9.78316	9.78523	9.56629	9.77733	9.7978	9.8217	9.58405	9.60138	9.69358	9.81749	9.81075	9.95355	9.65038	9.70293	9.51852	9.64523	9.56564	9.60589	9.81279	9.6319	9.45094	9.87234	9.82408	9.84024	9.73834	9.71798	9.81084	9.6474	9.61395	9.58865	9.63517	9.64517	9.53022
CG5991	5.46846	5.59587	5.58445	5.83694	5.68562	5.98372	6.38699	6.1698	6.2529	5.50563	5.16574	5.5089	5.32195	5.3063	4.94787	5.33631	5.11895	5.49675	5.5047	5.6757	5.41118	5.50635	5.6067	5.60533	5.48022	5.61862	5.63674	5.70637	5.71704	5.67994	6.00612	6.0188	5.97498	6.03738	6.01052	6.24161
CG34180	6.26768	6.20133	6.14926	4.43737	5.35975	4.20577	2.97496	2.86189	3.01789	5.17102	4.24946	4.49212	5.28263	5.23478	5.36569	4.3401	4.23911	4.33899	3.0262	2.59391	2.61961	3.96925	3.9377	3.9357	6.54698	6.66769	6.41905	5.12862	5.58886	5.45013	3.50112	3.59999	3.39606	4.25816	4.70982	4.25982
CG2875	2.29746	2.38045	2.45975	2.65994	2.72961	2.58697	2.44396	2.58453	2.38231	2.73098	2.82824	2.71772	2.2249	2.19571	2.2401	2.09279	2.20963	2.26462	2.11841	1.89012	1.92272	2.26814	2.32462	2.17509	2.23882	2.12025	2.29591	2.22126	2.29053	2.27646	2.15228	2.16903	2.08493	2.37282	2.32185	2.42219
Gdh	7.55133	7.57124	7.61435	7.26697	7.12731	7.17679	7.51915	7.6213	7.56958	7.12054	7.22925	7.28648	7.27708	7.12817	7.18419	7.09703	7.24459	6.89211	6.81999	6.77709	6.81636	6.94255	6.90431	6.8612	6.80709	6.7476	6.76885	7.02752	6.79072	7.00543	7.00279	6.91008	6.94075	6.79372	6.79992	6.65281
CG5130	3.51652	3.63103	3.9082	3.03289	3.09369	3.37206	3.30268	3.35812	3.51605	3.20068	3.15611	3.50702	3.26548	3.33477	3.57874	2.88355	2.79077	2.56113	2.47766	2.70102	2.72633	3.52578	3.40247	3.25828	3.1558	3.21966	2.98962	2.83501	2.69267	3.00611	2.52392	2.40235	2.20861	3.06911	2.8287	3.24175
CG1632	0.399447	0.375043	0.300727	0.674894	0.384489	0.611378	0.813578	0.931134	0.875768	0.562636	0.67267	0.687479	-0.756282	-0.900795	-0.898184	-0.783113	-0.742413	-0.753457	-0.902266	-0.68061	-0.796152	-0.815824	-0.711605	-0.668049	-0.828224	-0.847488	-0.890764	-0.785644	-0.913745	-0.937328	-0.83667	-0.774882	-0.817667	-0.888238	-0.746215	-0.88064
CheA86a	1.41051	-0.292551	-0.140745	1.3973	1.80462	1.29551	-0.502495	-0.658329	-0.304959	0.703425	0.847226	0.572833	2.39827	3.04776	2.63395	4.50903	3.59687	3.82026	-1	-0.800414	2.2476	1.92414	1.56703	2.39866	2.79391	2.19634	2.93315	4.32492	3.99523	3.9224	4.14897	4.16777	3.43917	1.57855	3.28262	0.818987
Mdr49	4.33023	4.17301	4.19827	3.81609	3.61912	3.70776	3.75357	3.76625	3.69941	3.57781	3.64212	3.8324	5.10853	5.25417	4.99522	4.96843	5.26516	4.88339	5.11405	5.08721	5.10629	5.02439	5.031	5.17708	5.13718	5.15981	5.16559	4.99335	4.79664	5.06549	5.14663	5.14323	5.1251	5.10577	5.06023	4.92196
tim	5.56802	5.7091	5.59233	4.34665	2.95365	4.16148	6.67314	6.62095	6.69352	6.24812	7.32382	7.21365	5.15388	5.22239	5.16798	4.45071	4.40355	4.24669	7.06576	7.17563	7.08281	7.44129	7.40715	7.55673	5.66442	5.48635	5.56988	4.31463	3.33914	3.98413	7.0346	7.07247	7.03649	7.54749	7.55664	7.54753
CG2003	4.63646	4.84885	4.80974	5.03587	5.32366	5.34176	5.2243	5.2075	5.20191	4.88156	5.23761	5.00221	3.88265	4.11961	4.01864	4.49179	4.27628	4.40785	4.01741	4.42312	4.36094	3.93879	3.76318	3.78187	3.90285	4.12273	4.01848	4.52023	4.43853	4.61363	4.29339	4.21305	4.08935	4.0051	3.95639	4.09121
CG6910	9.32714	9.45472	9.53829	9.14236	9.53262	9.46326	9.46685	9.53138	9.48112	8.48821	8.26787	8.44361	8.47	8.27629	8.41848	8.09847	7.83109	8.33182	7.95141	8.03445	8.19073	7.67921	7.67284	7.27668	8.87627	8.81914	8.62096	8.44675	8.85426	8.59861	8.68299	8.77533	8.65443	7.67879	7.88799	7.77201
Fer1HCH	10.0167	9.98714	10.0827	10.5227	10.7046	10.4392	10.4048	10.3508	10.3218	10.6604	10.3147	10.5537	9.19176	9.40571	9.26011	9.1505	9.03971	9.33818	9.03	9.2555	9.19275	9.08837	9.19933	9.30739	9.33856	9.24995	9.23465	9.35546	9.67876	9.56353	9.32581	9.4702	9.28502	9.36051	9.35897	9.47253
CG12112	2.46526	2.40122	2.88235	2.71425	3.09694	3.00471	2.29649	2.57068	2.64969	3.0262	2.92428	3.30625	1.89265	2.02036	1.81234	1.93585	2.05717	2.19928	1.80289	1.79564	2.08247	2.10311	1.9195	2.20215	1.7438	1.71511	1.7241	1.7419	2.3435	1.87945	1.69902	1.56111	1.70323	2.10017	2.0499	2.23266
Vago	5.89908	6.39221	6.32433	6.4119	7.13077	7.06582	6.00797	6.36459	6.10549	6.7551	6.86269	6.5416	5.36886	5.25504	5.09804	5.15908	5.00989	5.1823	5.38682	5.55882	5.46055	4.98138	4.97284	4.85445	5.00305	5.13764	5.1425	5.20399	5.76289	5.51508	5.505	5.60811	5.54676	4.9444	4.93514	5.23732
CG16775	2.93655	3.069	3.84502	3.65229	4.5195	5.0626	3.92821	4.02865	2.4642	5.78266	5.24114	5.05517	1.2918	2.45072	1.78108	2.16735	1.44294	2.51427	1.2145	2.03722	1.35684	2.8617	3.04749	2.82794	1.03252	1.37468	0.91234	2.60996	2.529	1.88299	1.79835	1.70526	1.75777	2.0247	1.98177	2.47298
CG15784	8.3512	8.33121	8.75895	9.42414	9.1947	9.58639	9.51348	9.5195	9.32116	9.26508	9.55192	9.56901	5.8451	6.2577	5.77719	6.15195	6.7095	6.48748	6.01246	6.08614	6.11734	5.91527	6.14869	6.30533	5.20701	5.22729	5.28421	6.25965	6.39453	6.26055	5.77193	5.95278	6.06752	5.7347	5.73414	5.83156
CG13575	0.732174	0.200876	0.5156	-0.378939	-0.28797	-0.0889937	-0.549873	-0.370959	-0.349207	0.15324	0.131034	0.212322	0.696829	0.523676	0.584361	0.104781	-0.263644	-0.0335274	-0.20209	0.0962194	-0.104385	-0.00227536	-0.172914	0.0984166	0.164292	-0.134806	-0.103491	-0.599657	-0.229236	-0.381235	-0.379303	-0.565743	-0.646664	-0.304167	-0.348834	-0.483458
CG18581	-0.799471	-0.25778	-0.404175	-0.384566	0.314621	-0.0916202	-0.673447	0.0111009	-0.181464	0.16823	0.319539	0.358086	-0.112714	-0.0587381	-0.905736	-0.418231	0.0163763	0.0465474	-0.797094	-0.0763136	-0.0677142	-0.444766	0.0451228	-0.372908	-0.0139566	-0.260814	-0.253364	-0.553867	-0.344443	-0.557753	-0.316207	-0.477329	-0.457876	-0.458436	-0.428126	-0.318358
Cyp301a1	1.45127	1.2828	1.40277	1.50054	1.51794	1.44226	1.73123	1.52679	1.75984	1.31686	1.28304	1.24587	1.80826	1.8406	2.1139	2.02868	2.17834	1.90698	2.13611	2.02023	2.01168	1.54492	1.51628	1.49112	1.43976	1.54566	1.55504	1.7805	1.58566	1.71067	1.75437	1.77318	1.90063	1.5764	1.40296	1.29048
CG17974	0.0205437	-0.221775	-0.168683	-0.524735	-0.62657	-0.723768	-0.886964	-0.857694	-0.771634	-0.895608	-0.794966	-0.703667	-0.116263	-0.182182	0.103133	-0.385326	-0.56973	-0.353953	-0.866558	-0.705896	-0.871366	-0.8456	-0.870208	-0.7987	-0.216639	-0.239792	-0.183399	-0.820001	-0.671681	-0.408869	-0.743529	-0.855866	-0.854082	-0.82971	-0.90324	-0.726554
CG34342	-0.298362	-0.499554	-0.157025	0.564162	0.147866	-0.04032	-0.48724	-0.7342	-0.440123	-0.0871886	-0.176358	0.243087	-0.359726	0.861082	0.236576	0.831845	0.392974	0.234953	-0.813634	-0.541186	0.290683	-0.321864	-0.419261	-0.312242	-0.054853	0.776335	0.00420769	0.605075	-0.0579919	0.98589	0.645504	0.58178	0.82552	-0.0896674	0.718102	-0.252608
hkb	-0.295413	-0.0833369	-0.187939	-0.298834	-0.145996	-0.263145	-0.621121	-0.371711	-0.744839	-0.241856	-0.0383947	-0.217418	-0.219613	-0.19697	0.278326	-0.102968	-0.763852	-0.0889979	-0.405314	-0.100266	-0.2039	-0.0245219	-0.290772	-0.10942	-0.287662	0.231282	0.00133509	0.0805722	0.0591432	0.0846838	-0.189429	0.0264884	0.0236409	0.143483	-0.0134709	-0.0721616
Cyp313b1	0.452195	0.420395	0.0850206	0.378585	0.523692	0.458573	0.115578	0.208152	0.133292	0.791609	0.712558	0.835611	1.10661	0.912335	0.761621	0.748025	0.955656	0.81852	0.8677	0.870609	0.6366	0.673521	0.83743	0.894059	0.38038	0.610092	1.05276	0.838426	0.987002	1.01572	0.703377	0.52619	0.860842	0.530637	0.688935	0.695029
Cng	0.797943	0.606239	0.585912	0.57501	0.224008	0.362118	0.500078	0.429376	0.65108	0.198561	0.152945	0.229311	0.788899	0.879909	0.850228	0.619335	0.686019	0.636227	0.597064	0.680898	0.681124	0.883902	0.942285	0.836218	0.950071	1.05125	0.89814	0.88266	0.659589	0.671313	0.753837	0.716122	0.757973	1.00247	0.959824	1.12184
Ir52b	-0.746215	-0.772948	-0.722627	-0.37132	-0.523352	-0.494	-0.870906	-0.773378	-0.846117	-0.70154	-0.706621	-0.767843	-0.65955	-0.548603	-0.595681	0.0968474	-0.47049	-0.293627	-1	-0.901272	-0.704151	-0.769821	-0.851889	-0.959231	-0.671162	-0.496799	-0.850365	-0.295523	-0.610642	-0.314661	-0.442493	-0.337113	-0.533236	-0.74679	-0.667797	-0.881504
CG12947	0.838224	0.953999	0.867759	0.440162	0.473588	0.542662	0.842505	0.793808	0.783905	0.74544	1.15753	1.14678	0.83995	1.22676	1.10101	0.989163	0.632436	0.950099	0.905241	1.01863	1.04192	1.40871	1.27125	1.01955	0.730368	0.715375	0.665523	0.618598	0.729873	0.638389	0.880753	0.917792	0.869381	1.17826	1.17574	1.0563
CcapR	0.541853	0.467695	0.594672	0.3384	0.220749	0.236838	0.0783859	0.0993858	0.190774	-0.0128974	0.0580193	0.239607	0.585042	0.65654	0.779315	0.619963	0.276771	0.568585	0.303735	0.462564	0.275839	0.473413	0.505931	0.284212	0.625955	0.716815	0.657107	0.650658	0.454637	0.591641	0.474847	0.508764	0.297042	0.58469	0.622343	0.45177
CG14965	0.752048	0.363476	0.693024	0.810685	0.584878	0.829213	0.712446	0.394548	0.68257	0.666168	0.258141	0.522455	0.802855	0.791984	0.818055	0.875173	1.1981	1.09435	0.764882	0.654515	0.844084	0.843437	0.986997	1.09312	0.979014	1.13673	0.866595	1.11284	1.07089	0.977197	0.776285	0.6499	0.573222	0.71102	0.942011	0.90871
snoRNA:SC35-a	1.37328	0.667456	1.01183	0.72027	0.502418	0.329494	0.341442	-0.154867	-0.00853101	1.00959	0.119838	0.281317	1.38271	0.216097	1.42464	1.26573	1.43622	1.2622	1.63494	0.252092	0.744543	0.470813	0.684735	0.945562	2.39493	1.6106	1.10087	0.78931	-0.181563	0.797372	1.01849	1.73342	0.653713	0.818269	0.736207	0.380332
CG13568	-0.238006	-0.189831	0.540441	0.598651	0.484354	0.575577	0.057274	-0.258436	-0.108441	0.426508	0.30578	0.459915	0.161599	0.176042	0.1925	0.81286	0.363017	0.420948	-0.303903	-0.281249	0.0316325	0.0519217	-0.156782	-0.130132	-0.22013	0.0269725	-0.146717	0.635285	0.379753	0.7471	0.590744	0.593109	0.612923	0.35322	0.503919	-0.315619
CG17599	-0.265837	-0.262805	-0.519072	0.216077	0.0294411	0.0721717	-0.261675	-0.381104	-0.277601	-0.140564	-0.270888	-0.253114	-0.0709804	0.128734	-0.00533305	0.567652	0.288743	0.0155267	-0.336219	-0.395447	0.0870941	-0.138285	-0.262887	0.0483758	-0.487168	0.25949	-0.0482143	0.288069	0.113726	0.515823	0.170631	0.471749	0.211266	-0.0502436	0.0760479	-0.635343
CG6739	0.184279	0.150515	0.116885	0.540339	0.131937	0.313806	0.873051	0.749857	0.75038	-0.184176	0.0199287	0.261645	0.779972	0.482777	0.695492	1.06193	0.948797	0.869672	0.993621	1.2285	1.11164	0.723885	0.741007	0.656423	0.856122	0.527422	0.621179	1.16468	0.628966	1.00311	1.5854	1.43059	1.4538	0.797115	1.18425	0.775693
CG14007	0.0443378	-0.47821	-0.632863	0.521355	0.1626	-0.110932	-0.359028	-0.83704	-0.73957	0.520187	-0.307084	0.232772	-0.153612	-0.19676	-0.127433	1.14778	0.481608	0.269241	-0.742239	-0.941342	-0.538984	-0.314676	-0.285123	-0.167444	-0.545249	-0.658875	-0.223082	0.558156	0.195134	0.491726	0.468481	0.333426	0.384822	-0.536002	0.0109469	-0.688813
Lsp1gamma	-0.348684	-0.426412	-0.300367	-0.654303	-0.708054	-0.582558	-0.719631	-0.772842	-0.553505	-0.858743	-0.676682	-0.782727	-0.465482	-0.710046	-0.541426	-0.552063	-0.60214	-0.656337	-0.455716	-0.654585	-0.592936	-0.375246	-0.710054	-0.452235	-0.387968	-0.506809	-0.148005	-0.169168	-0.458589	-0.497648	-0.317877	-0.82416	-0.614418	-0.592589	-0.670309	-0.574234
CG30101	-0.635539	-0.634718	-0.620238	-0.629319	-0.758759	-0.774708	-0.795472	-0.944059	-0.86497	-0.777259	-0.732346	-0.733467	-0.781203	-0.953379	-0.734048	-0.58759	-0.729589	-0.837718	-0.909582	-0.922921	-0.75301	-0.766218	-0.829232	-0.737119	-0.683823	-0.712547	-0.850905	-0.659645	-0.385873	-0.755887	-0.650491	-0.902222	-0.721289	-0.645292	-0.699591	-0.691085
CG15414	0.0621777	0.180658	0.441001	-0.162354	-0.262879	-0.147997	0.297989	0.244217	0.152002	0.50335	0.805978	0.797282	0.111028	-0.342277	-0.437541	-0.324156	-0.0691788	-0.332	0.0958937	0.490381	0.0548607	0.719239	0.419351	0.166651	-0.396495	-0.232095	-0.323426	-0.357969	-0.455752	-0.014907	-0.059065	-0.239829	-0.0755845	0.00790738	-0.431048	-0.498643
CG34409	1.22946	1.3817	1.42313	1.1737	1.16471	1.26412	0.788018	0.791999	0.575522	1.11214	1.38294	1.17527	1.38333	1.43614	1.54368	1.50809	1.25836	1.29122	0.670552	1.02	0.869282	1.2298	1.35351	1.11729	1.35885	1.47452	1.01119	1.41173	1.44847	1.41726	1.00454	1.1269	1.28361	1.24617	1.19947	1.12154
Klp54D	0.125409	0.0151	-0.112797	0.448396	0.281109	0.283695	-0.0869306	-0.247845	-0.282672	0.787063	0.137005	0.0466398	0.0607217	0.0552576	0.15407	0.691023	0.334896	0.203316	-0.11307	-0.331366	0.0547043	-0.00730494	-0.200433	0.177898	0.11067	0.396003	-0.00264515	0.66458	0.311313	0.735103	0.417108	0.333778	0.497253	0.0105947	0.546185	-0.0811028
CG13068	-0.179941	-0.30696	0.374992	-0.524763	-0.396499	0.271898	-0.259637	-0.375597	0.00573958	0.378942	0.430452	1.02056	0.245397	-0.255995	0.254847	0.0930013	-0.386972	-0.0355637	-0.0847081	0.024061	0.0833986	-0.24429	0.0157676	-0.0220694	0.0557648	-0.127733	0.165284	0.0968832	0.0274038	-0.293938	-0.159629	0.189496	0.187211	0.224213	-0.0355753	0.0158491
CG13154	-0.719733	-1	-0.935181	-0.85037	-0.860081	-0.869634	-1	-0.952902	-1	-0.775776	-0.802571	-0.815722	-0.914454	-0.779179	-1	-0.787483	-0.82397	-0.819552	-0.782324	-0.813263	-0.523033	-0.828081	-0.519215	-0.385307	-0.62839	-0.80082	-0.757842	-0.799774	-0.500667	-1	-0.774067	-0.741553	-0.691416	-0.643032	-0.840915	-0.696877
CG14893	-0.567223	-0.572134	-0.540706	-0.560005	-0.338657	-0.369031	-0.580265	-0.480831	-0.324509	0.984315	1.12972	0.800021	-0.737765	-0.798472	-0.518699	0.251557	-0.901615	-0.275675	-0.154314	0.7462	-0.445377	-0.501284	0.891469	-0.0646682	-0.932453	-0.511932	-0.450251	-0.0206394	0.893835	-0.20978	0.322808	2.07485	2.53441	0.184134	-0.0673819	0.0123889
CG12853	-1	-0.883171	-1	-0.383044	-0.11052	-0.565075	-0.73237	-0.451099	-0.794373	5.01113	-1	-0.638088	-0.671528	-1	-0.508041	-0.848518	-0.116463	-0.197992	-1	-0.82556	-0.630909	-0.695002	4.52666	4.8587	-0.136242	-0.610636	-0.489078	-0.396627	4.23496	-0.806009	-0.376486	-0.475997	-0.49827	-0.822972	-0.593695	0.959473
CG9961	-0.00649123	0.146721	0.118899	0.603037	0.885333	0.530604	0.232972	0.58964	0.344805	2.27542	0.106389	0.69448	0.587667	0.619958	0.466742	0.957366	1.17944	0.877954	0.914027	0.865055	0.771698	0.605909	2.14289	3.10303	1.03223	0.97297	0.864292	1.16606	2.09153	1.23748	0.987108	1.32259	0.966332	0.881465	1.15168	1.18778
CG12105	5.15439	5.18632	5.05815	4.59668	4.36617	4.68217	5.05578	5.0876	5.00651	4.36201	5.0603	4.86865	5.23722	5.31673	5.43616	5.09043	5.56929	5.25259	5.82994	5.63361	5.65757	5.61075	5.38187	5.25107	5.58701	5.70322	5.59764	5.21854	5.18421	5.21093	5.60327	5.64523	5.34926	5.32521	5.14316	5.35594
CG11241	3.80187	3.74962	3.86532	3.77922	3.94179	3.96653	4.12184	4.07034	4.15684	4.25902	4.14606	4.38477	4.2692	4.21812	4.06326	4.37633	4.12595	4.41589	4.65853	4.66898	4.73706	4.68198	4.82232	4.72187	4.1544	4.18655	4.08317	4.42291	4.49675	4.46436	4.5429	4.65384	4.67936	4.81059	4.90088	4.81715
CG14277	4.09562	3.43013	3.1618	5.20564	5.27972	4.32949	3.27941	2.66787	3.20499	4.8252	3.61638	4.43854	4.19691	4.64088	5.03809	6.20351	5.78535	5.02519	1.02947	1.45519	3.82266	3.73997	3.30903	4.02352	4.14399	4.29388	3.85406	5.68931	5.29152	5.81657	5.83495	5.64754	5.27609	3.23077	5.32696	2.89372
CG8006	-0.959605	-0.95452	-0.931419	-0.879867	-0.887738	-0.884309	-1	-1	-0.958642	1.47057	-0.857809	-0.948855	-0.578005	-0.731648	-0.963371	-0.80198	-0.525395	-0.854824	-0.919325	-0.833928	-0.90349	-0.535451	2.16593	2.35641	-0.715627	-0.814464	-0.725281	-0.838699	1.43699	-0.85036	-0.842357	-0.88478	-0.869399	-0.739038	-0.78007	-0.336533
CG10553	5.30087	5.82685	5.55594	4.27651	4.35994	4.37916	4.81967	4.63871	4.4852	5.5082	5.15271	5.04698	5.9209	6.08844	5.79866	5.02866	4.83669	4.97784	4.80516	4.98109	4.91406	4.87231	5.10357	4.9934	6.64673	6.82014	6.7053	5.58377	5.67868	5.74938	5.91555	5.76999	5.69167	5.89606	6.07692	6.05282
CG11878	5.07764	5.59706	5.605	5.57222	5.5998	6.16967	6.28143	6.07448	6.07291	7.13861	6.85973	6.83503	5.70208	5.87453	5.11206	5.64094	5.68759	6.00398	5.83099	6.16617	6.17368	6.4206	6.76459	6.93881	4.73057	4.5309	4.86429	5.35893	5.59194	5.06069	5.2901	5.40079	5.77253	6.24218	6.23213	6.21326
CG3739	6.803	7.56861	7.81381	5.47858	6.18403	6.19022	6.42168	7.04471	6.39577	7.85258	8.11857	7.82457	6.93002	6.91741	6.96398	6.38379	5.52378	6.08946	6.28704	6.97323	6.46806	8.87698	9.18446	9.2807	7.22694	7.17607	6.91382	5.94055	6.25348	6.12602	6.61814	7.13719	6.82758	8.84027	9.10476	9.07344
CG11437	1.17697	1.36184	0.976091	0.947477	0.918482	0.47483	0.515517	0.4105	0.716433	0.231788	0.1218	0.216541	1.81161	2.62963	2.21889	1.9689	1.51691	1.5908	1.49102	1.69067	1.46473	0.822727	1.11049	1.18419	2.90968	3.05469	2.9636	2.87518	2.83563	3.05386	2.5278	2.35886	2.36415	1.76595	1.98922	2.06292
Cyp6a21	4.23606	4.12706	3.79473	3.65045	3.61817	3.24123	3.26075	3.10829	3.17115	3.897	3.53463	3.79669	4.51171	4.90018	4.79472	4.5898	4.41949	4.34644	2.91764	3.01163	2.95327	3.79025	3.82569	3.9358	4.92671	5.01182	4.76355	4.61169	4.50984	4.68996	3.82715	3.6306	3.67647	4.14625	4.61409	4.28801
l(1)G0334	8.1538	8.12129	8.11965	8.00541	8.23691	8.02052	8.05055	7.99614	8.00426	7.95661	7.91201	7.95636	8.64712	8.51754	8.58449	8.48199	8.4478	8.43295	8.64738	8.46329	8.61319	8.52571	8.53628	8.39599	8.591	8.68629	8.66379	8.45287	8.62079	8.49357	8.5168	8.39302	8.44413	8.44263	8.2927	8.32936
CG31300	5.58644	5.59691	5.56453	5.28702	5.22027	5.14983	5.12379	5.12089	5.13	4.90157	5.04599	5.20002	6.15965	6.41094	6.00389	5.96853	5.49848	6.23879	5.24257	5.46123	5.37196	5.7049	5.77517	5.78575	6.20901	6.11934	6.18703	5.77293	5.85874	5.98156	5.42277	5.42088	5.54856	5.50534	5.66904	5.43759
Ahcy89E	3.27875	3.41502	3.58603	3.81216	3.89554	3.70318	4.08211	4.13087	4.05752	3.64819	3.54661	3.73123	3.46828	3.74078	3.66195	4.00075	3.99853	3.86565	4.18544	4.40436	4.18027	3.66526	3.59097	3.49162	3.61278	3.75044	3.60245	4.15988	4.12294	4.26039	4.64076	4.55601	4.62904	3.87516	3.92485	3.88613
CG4462	3.9347	3.83981	3.78113	3.80093	3.67496	3.73417	3.87524	3.79546	3.77699	3.48164	3.12474	3.26195	4.27433	4.55169	4.31157	4.41682	4.19168	4.41519	4.14153	4.32571	4.21121	4.00057	3.92918	4.2157	4.44933	4.54533	4.40237	4.63916	4.35281	4.6336	4.75214	4.50128	4.53306	4.36359	4.52018	4.30032
GstE2	3.45644	3.34986	3.51004	3.59052	3.83702	3.71525	3.36945	3.12569	3.32651	2.73915	2.69977	2.96581	4.1205	3.918	4.092	4.2942	3.96859	4.01522	4.04194	3.85393	4.02844	3.65839	3.45747	3.41992	4.28303	4.46257	4.34847	4.40874	4.5789	4.45085	4.31655	3.97603	4.20879	3.85162	3.77936	3.89327
Cyp4e2	6.04695	6.24004	6.08593	6.11304	6.05451	5.85531	5.6294	5.77663	5.6348	6.3708	6.20793	6.16282	6.44233	6.60367	6.24345	6.36576	5.91138	6.3648	5.8785	6.25765	6.21464	6.31896	6.51732	6.45912	6.18638	6.31833	6.20703	6.35997	6.3651	6.24137	6.27269	6.19943	6.33183	6.56874	6.69795	6.58628
CG9782	2.78682	2.994	3.05878	2.4632	2.85074	2.84043	3.25665	3.35744	3.41007	3.86619	3.29863	3.98593	2.7017	2.8427	2.78996	2.6736	2.79474	2.64723	3.24319	3.3533	3.44852	3.71458	3.70799	3.40827	2.95547	2.98596	2.80063	4.05395	2.99506	3.00472	3.89617	4.29289	3.78181	3.87674	4.11539	4.68118
CG14613	4.19683	4.21009	4.23023	4.43022	4.23066	4.47613	4.42424	4.34258	4.42199	4.53095	4.50391	4.54688	4.6148	4.77135	4.61122	4.76011	4.53494	4.70678	4.71589	4.68384	4.78023	4.6812	4.70138	4.97142	4.79271	4.8394	4.69823	4.73879	4.73616	4.80311	4.77888	4.79842	4.6287	4.71371	4.80408	4.82827
CG4495	5.39107	5.36999	5.35533	5.5633	5.63773	5.55524	5.40627	5.39152	5.38232	5.48951	5.35073	5.43599	5.70838	5.53249	5.48978	5.69298	5.5741	5.78682	5.77422	5.71398	5.66453	5.65473	5.69836	5.62082	5.88933	5.75913	5.89968	5.9521	6.09626	6.04369	6.02731	5.86312	5.87115	5.93382	5.73769	6.07863
CG17322	4.74616	4.65761	4.76088	4.34919	4.45418	4.54948	4.18227	4.31946	4.38765	4.29196	4.17445	4.29471	4.85451	4.75644	4.74593	4.65646	4.33319	4.69821	4.45081	4.53593	4.50317	4.53734	4.52199	4.51873	5.03466	4.99169	4.85132	5.01536	5.02154	5.06099	5.02471	4.88717	4.82631	4.7911	4.65414	4.87529
CG1441	4.8803	4.81374	4.32893	4.42487	4.21047	3.571	3.41606	3.27109	3.57066	4.06358	3.85103	4.144	4.12444	4.53836	4.64636	4.68178	4.56701	3.98008	3.05806	3.10556	3.44528	3.79747	3.65339	3.7114	4.88469	4.85991	4.45828	4.66472	4.31762	4.59395	4.60272	4.62252	4.12181	3.96859	4.91077	4.1097
CG10253	4.97641	4.96701	4.95049	4.29851	4.5006	4.33185	4.32586	4.2416	4.32851	4.72329	4.63281	4.91059	4.85068	4.92929	4.86788	4.24685	4.68338	4.49425	4.74722	4.76822	4.8219	5.57741	5.44485	5.37417	4.87324	4.95323	4.94433	4.44873	4.60452	4.64519	4.64614	4.68113	4.65282	5.44973	5.35214	5.37063
CG31100	3.33867	3.78601	3.57697	3.64	3.40297	3.45612	4.12598	4.00827	4.07942	4.08741	4.35523	4.33167	3.88194	3.82959	3.78442	3.80315	3.83599	3.90521	4.07446	4.08976	4.07748	4.48885	4.38049	4.36865	3.76923	3.72965	3.72088	3.73098	3.5532	3.71196	4.346	4.29789	4.18417	4.51256	4.56787	4.50068
Ugt35b	5.8842	5.93668	6.05669	5.23272	5.86839	5.23396	3.8045	3.86763	3.66315	4.81786	4.06977	4.25705	6.47693	6.82386	6.60449	6.09275	5.86778	6.08708	4.33909	4.60945	4.47506	4.61147	4.59105	4.53937	6.49905	6.84369	6.59641	6.32579	6.52144	6.30829	4.90644	4.7175	5.07335	4.66934	4.77326	4.78656
barc	4.11579	4.09435	4.1138	4.30593	4.43868	4.32416	4.26029	4.19659	4.29161	4.26189	4.22796	4.36256	4.4161	4.45065	4.35769	4.50723	4.82841	4.48846	4.46347	4.51201	4.5147	4.48398	4.52593	4.65416	4.49222	4.47668	4.34609	4.49035	4.59656	4.57932	4.60163	4.47477	4.47914	4.54284	4.48693	4.59719
Osi8	0.681208	-0.410657	-0.505258	1.57419	1.45319	0.860291	0.52082	-0.626599	-0.31214	1.02007	0.56473	0.625083	0.651328	1.14908	1.19064	2.01936	1.80085	1.0914	-1	-0.859209	0.795172	0.0233934	-0.473845	0.471629	0.550309	1.04613	0.824579	2.09383	1.65758	2.19379	1.86377	2.20976	1.9512	0.357206	1.53597	0.105797
CG12140	6.39444	6.39449	6.42223	6.22201	6.32373	6.02758	6.21292	6.139	6.22654	6.28362	6.2208	6.30921	6.52091	6.57885	6.52493	6.39905	6.49742	6.39294	6.45129	6.41323	6.50026	6.48995	6.57852	6.40825	6.57318	6.60683	6.56172	6.39007	6.53204	6.45074	6.39198	6.49954	6.4146	6.6088	6.67141	6.59417
Cyp4ae1	2.64521	2.63558	2.69012	2.42435	2.43694	2.45336	2.59098	2.70882	2.51633	2.9465	2.90515	2.9985	2.86022	2.96809	2.85292	2.90401	2.76954	2.69466	2.5932	2.71969	2.85304	3.07287	3.06544	3.25291	3.12021	3.0005	2.93319	2.83065	2.96156	2.87117	2.90386	2.88904	2.78702	3.08646	3.24457	3.19082
Dredd	3.6521	3.64926	3.66653	3.68723	3.71069	3.82552	3.5452	3.58346	3.69945	3.86617	3.75961	3.86055	3.92889	3.96075	3.93172	4.05934	3.9386	3.96802	3.78512	3.9444	3.92598	4.06372	3.98839	3.97339	3.91183	3.91101	3.95501	4.23236	4.2464	4.30097	4.06847	4.02933	4.08622	4.11322	4.07424	4.05385
CG11529	2.28254	2.27217	1.79775	2.51817	2.83489	2.48825	3.71157	3.59789	3.85412	3.21352	2.61532	2.98666	1.74382	1.7989	1.87992	2.69545	2.19632	2.25652	3.03496	3.05469	3.29869	2.74064	2.57666	2.47801	1.4714	1.7142	1.83465	2.15513	2.56482	2.57546	3.84307	3.59059	3.46158	2.76275	2.99896	2.90413
Cpr73D	3.49353	3.11319	2.97452	3.65255	3.36938	3.10765	2.80305	2.44381	2.65616	3.03586	2.9881	3.3101	3.5218	3.53958	3.73929	4.15383	4.14535	3.54855	2.52737	2.71038	3.15388	3.43184	2.99357	3.26196	3.1342	3.27486	3.15324	3.70834	3.36425	3.74082	3.48799	3.43613	3.21542	2.60241	3.52681	2.66929
Ugt35a	4.58493	4.68388	4.56686	4.85181	4.79957	4.62563	4.14934	4.13719	4.15758	4.52933	4.21559	4.29809	4.53573	4.82667	4.73322	4.85384	4.74709	4.59087	4.03381	3.98203	4.32936	4.06734	4.04227	4.23452	4.60186	4.95706	4.70942	5.04223	4.7296	4.94465	4.65955	4.41902	4.2567	4.06129	4.1935	4.4765
Galk	5.72931	5.84809	6.07871	5.54969	5.71552	5.67919	5.41202	5.58867	5.48256	5.71294	5.84373	5.79685	5.9996	5.91166	5.55366	5.85977	5.82589	5.93702	5.46677	5.75386	5.91506	5.53647	5.77334	5.49188	5.68478	5.50555	5.73807	5.78948	6.16796	5.88051	5.7704	5.74424	5.80072	5.70736	5.97394	5.89988
Acer	5.57735	5.45204	5.66987	5.99163	6.08937	6.22081	5.98169	6.12978	6.0689	5.97596	5.81866	5.85804	5.90307	5.97339	5.75067	6.02006	6.12592	6.2625	6.12173	6.12403	6.04889	5.56608	5.87649	5.68652	6.06033	6.10218	6.12141	6.44769	6.67714	6.50375	6.31857	6.37042	6.4956	6.10847	6.18764	6.17018
Cfp1	2.7713	2.68238	2.77594	2.90237	2.85684	2.87983	2.91522	2.86514	2.73935	2.97091	2.91933	2.92101	3.10498	3.14433	3.09499	3.23715	3.32936	3.14916	3.1775	3.11928	3.05299	3.2631	3.12326	3.15886	2.92434	3.05243	2.84414	3.08975	3.20318	3.21199	2.97165	3.0631	2.92494	2.98846	2.79486	2.99285
eIF-4B	7.60696	7.69161	7.65468	7.90147	7.90436	7.8759	7.7809	7.66877	7.74928	7.59002	7.55813	7.71154	7.75393	7.72362	7.67771	7.91029	7.78433	7.98412	7.77148	7.78793	7.75273	7.81965	7.74169	7.74213	7.71993	7.7581	7.61239	7.72566	7.85807	7.83122	7.76354	7.69418	7.70009	7.7707	7.67703	7.79289
cln3	5.01996	5.42066	5.42729	4.84177	5.11104	4.92744	5.11478	5.25744	5.16621	5.65962	5.85433	5.64143	5.08269	5.13362	4.91647	5.1488	4.86932	5.2371	6.07391	5.86762	6.02718	4.83554	4.99503	5.07869	4.59446	4.81722	4.69215	5.07795	5.15851	5.13935	5.82912	5.89879	5.81006	5.17886	4.94524	5.17688
bor	3.17345	3.23008	3.27968	3.26309	3.08912	3.28392	3.22178	3.31527	3.27336	4.00442	3.77762	3.67809	3.38485	3.42045	3.34971	3.20889	3.57218	3.15185	3.36267	3.31944	3.35063	3.48468	4.00054	4.34609	3.36338	3.23986	3.3936	3.3376	3.43997	3.27546	3.33317	3.24258	3.31966	3.56945	3.48549	3.58797
CG13876	2.62912	2.6604	2.45556	2.57731	2.85408	2.43363	2.57399	2.59104	2.41278	2.90769	2.79236	2.65269	2.96122	2.78209	2.82772	2.96869	2.5066	3.00643	2.71302	2.81696	2.85848	2.96599	3.08932	3.05042	2.74698	2.76602	2.77778	2.82646	3.02203	3.04545	2.80261	2.74341	2.72241	2.84441	2.79013	2.92346
TfIIB	4.3349	4.27422	4.39869	4.48485	4.55869	4.62503	4.48858	4.33184	4.40748	4.79527	4.53542	4.64186	4.52784	4.37225	4.44963	4.55129	4.22277	4.53573	4.44611	4.49771	4.65815	4.5888	4.70309	4.83305	4.59694	4.58825	4.56648	4.59998	4.81631	4.68346	4.68677	4.53698	4.58767	4.52315	4.51771	4.73354
CG10226	3.44225	3.5267	3.47394	3.51131	2.71043	3.55026	3.40563	3.46718	3.43579	3.32128	3.36377	3.32375	3.62542	3.68487	3.64692	3.67989	3.72008	3.55501	3.60638	3.76712	3.68574	3.58521	3.56314	3.29588	3.51179	3.58274	3.64912	3.67556	3.31929	3.51371	3.76162	3.63906	3.69978	3.57018	3.49626	3.72303
CG3894	3.4259	3.44502	3.42068	3.45417	3.36473	3.60839	3.49203	3.51659	3.53071	3.64328	3.6277	3.78847	3.49257	3.83613	3.59842	3.58772	3.68462	3.68761	3.67023	3.52592	3.58114	3.64603	3.68776	3.90407	3.44719	3.41228	3.41386	3.55328	3.57116	3.68852	3.52223	3.62871	3.58112	3.59082	3.6462	3.63759
s-cup	1.16776	0.960036	0.72019	1.50427	1.30204	0.997162	0.816599	0.566927	0.685539	1.0553	0.723628	1.03575	1.39271	1.55618	1.5006	2.02726	1.88229	1.47648	0.79917	0.928258	1.3102	1.27047	1.29378	1.32494	1.22437	1.27522	1.14749	1.70267	1.27895	1.64644	1.73578	1.74665	1.46162	1.28617	1.28314	0.795943
CG7430	8.37139	8.31143	8.33994	8.15306	8.1388	8.03292	8.2901	8.19114	8.23522	7.96173	8.03423	8.12524	8.5781	8.38722	8.43914	8.25473	8.64093	8.17703	8.5431	8.32315	8.42014	8.38345	8.37362	8.26952	8.4933	8.58294	8.59886	8.31004	8.37251	8.39826	8.33323	8.26592	8.33683	8.36277	8.24514	8.26543
CG3281	2.54277	2.55852	2.4965	2.5972	2.51683	2.51371	2.4078	2.45614	2.46209	2.66892	2.64888	2.61006	2.75352	2.84787	2.77915	2.99919	2.82938	2.83192	2.85401	2.80109	2.70497	2.82352	2.80709	2.89385	2.79324	2.81491	2.68743	2.84282	2.88024	2.80394	2.85437	2.86306	2.72591	2.86371	2.81911	2.78496
Moca-cyp	4.5699	4.58955	4.59151	4.61094	4.66775	4.64965	4.55528	4.57027	4.56861	4.56921	4.64239	4.73396	4.73669	4.86157	4.75021	4.78512	5.07186	4.82644	4.86175	4.85301	4.83441	5.00567	4.87625	4.92274	4.5818	4.59629	4.53779	4.57739	4.61845	4.6542	4.59418	4.60832	4.54638	4.65002	4.71238	4.71602
CG12730	4.49574	4.52742	4.5473	4.73247	4.79701	4.72502	4.57733	4.61423	4.52817	4.7379	4.64095	4.75935	5.00838	5.0201	4.98353	5.05701	4.8667	4.88188	4.63773	4.65896	4.67165	4.95343	4.92294	4.82073	4.77981	4.89511	4.7654	4.82935	4.60788	5.06972	4.82366	4.75367	4.63129	4.65052	4.74461	4.86942
Mdr50	2.86649	3.02537	2.86586	2.3487	1.41643	2.95831	2.16302	1.99488	1.95416	2.48434	2.53304	2.60234	2.97498	3.21445	2.23389	2.08694	2.54637	2.02146	1.65097	1.76812	1.5992	1.42428	1.83522	3.17336	3.59504	3.39217	3.71635	2.25185	2.34976	2.26973	2.29005	2.0538	2.61429	1.75757	2.1867	1.74856
bl	4.87836	4.94167	4.97054	5.06706	5.09409	5.09946	4.95827	5.04025	5.00747	5.10989	5.07117	5.09683	5.18897	5.27111	5.15048	5.31398	5.46503	5.27106	5.26968	5.15984	5.28115	5.25672	5.26191	5.3541	5.07155	5.11605	4.99835	5.29669	5.23925	5.28185	5.14043	5.18533	5.19401	5.09097	5.13684	5.12123
CG34256	1.30432	0.913724	0.934864	2.00786	1.31832	1.66786	1.71991	1.66837	1.66842	1.82318	1.8088	1.93503	1.35652	1.27867	1.38148	1.48253	1.41288	1.51982	0.717647	1.55663	1.31181	1.38355	2.06513	1.77841	1.51285	1.49498	1.44367	1.8183	1.56208	1.40263	1.3127	1.38049	1.37907	1.33869	1.23217	1.60175
CG4953	3.29289	3.35208	3.38936	3.61898	3.51054	3.69736	3.46505	3.38355	3.4103	3.52995	3.46942	3.6292	3.50439	3.52908	3.53796	3.63847	3.65399	3.63125	3.42773	3.55748	3.44123	3.5027	3.49816	3.53224	3.53204	3.52167	3.4273	3.47967	3.64589	3.74804	3.54442	3.48369	3.44622	3.57166	3.63123	3.67731
Mal-A7	2.66375	2.61524	2.51464	3.30719	3.24771	3.71199	2.0918	2.86357	1.77058	6.97273	5.32833	4.51787	3.63333	4.46376	2.15743	3.12191	3.16357	4.15464	2.64266	3.72601	3.51901	2.25743	5.45594	6.40868	1.47768	0.612336	1.57047	3.3027	5.06819	3.57652	2.39041	2.95683	3.75725	5.18542	4.58941	3.4315
dpr5	1.5082	1.45978	1.42791	1.45888	1.25662	1.33439	1.36355	1.33001	1.28839	1.27164	1.26895	1.18014	1.82361	1.71243	1.59873	1.74278	1.83664	1.58318	1.89842	1.94069	1.70483	1.97491	1.79111	1.80828	1.90078	1.85574	1.84143	1.58339	1.58563	1.88019	1.97809	1.69518	1.82969	2.12909	1.80268	1.89106
Gprk1	5.30213	5.36909	5.33704	5.54672	5.4834	5.56672	5.42789	5.39951	5.40144	5.22296	5.31459	5.37653	5.35327	5.2181	5.36344	5.61863	5.32978	5.54494	5.42593	5.45447	5.48715	5.41207	5.39226	5.36969	5.5872	5.60778	5.44717	5.61516	5.51552	5.62352	5.84385	5.67297	5.59901	5.65132	5.53315	5.79409
CG14722	4.22251	4.29847	4.33127	4.55972	4.1248	4.59903	4.28257	4.3639	4.38895	4.38198	4.4931	4.51547	4.48272	4.31731	4.31194	4.50743	4.39497	4.4891	4.33358	4.4358	4.39851	4.39309	4.49849	4.59747	4.38178	4.40828	4.33948	4.52718	4.27928	4.54528	4.46357	4.35633	4.29147	4.44702	4.34209	4.58404
Tsp42Ee	7.31401	7.34735	7.48553	7.76858	7.62112	7.85644	7.57815	7.65351	7.63573	7.60132	7.40138	7.73365	7.47534	7.49636	7.46365	7.73501	7.35163	7.67585	7.51006	7.60587	7.60139	7.49799	7.48519	7.46837	7.4435	7.47869	7.4342	7.73856	7.68492	7.84817	7.8047	7.66648	7.76403	7.54324	7.63945	7.67731
CG9449	3.92971	3.89216	3.84067	4.25027	4.37463	4.09762	3.61141	3.71376	3.67765	3.90795	3.35292	3.68674	3.79642	3.95765	3.81081	4.06535	4.13291	3.72271	2.96703	3.34556	3.627	3.15749	3.24113	3.49802	3.37681	3.81778	3.56147	3.85814	3.8591	4.01544	3.85051	3.83514	3.91956	3.19958	3.71874	2.932
Snx3	5.76464	5.80664	5.84304	5.95043	5.95195	5.97603	5.88119	5.975	5.93594	5.9777	5.9134	6.05874	5.71942	5.82404	5.79186	5.96945	6.06712	5.90748	5.76972	5.85277	5.82691	5.8675	5.88377	5.88049	5.78592	5.78398	5.74472	5.81475	5.93051	5.92144	5.93383	5.96474	5.8219	5.74575	5.83754	5.89739
Got1	7.6584	7.64344	7.68206	7.61487	7.65211	7.59309	7.37954	7.54865	7.43699	7.39137	7.4258	7.45975	7.73459	7.66869	7.52613	7.66307	7.62284	7.66094	7.27212	7.43446	7.50924	7.15058	7.24774	7.17222	7.74706	7.703	7.69608	7.86335	7.95663	7.88104	7.76039	7.6873	7.73766	7.34915	7.48314	7.43007
CG30005	4.1702	4.28703	4.19089	4.41736	4.68911	4.4259	4.11765	4.21319	4.13305	4.80565	4.46948	4.4849	4.30275	4.4049	4.23364	4.54293	4.51488	4.38955	4.13123	4.15421	4.27371	4.18618	4.29993	4.23063	4.15637	4.09313	4.07159	4.43357	4.5514	4.4159	4.26107	4.23224	4.21927	4.17808	4.33389	4.30541
e	3.61752	3.63968	3.54022	2.38739	2.17019	2.29988	1.90012	1.97495	1.97215	1.60676	1.89241	1.82348	4.13513	4.11365	4.37286	3.73207	3.9905	3.54155	2.8059	2.93431	2.83543	2.90542	2.81917	2.69186	3.79473	3.90915	3.87635	3.33149	2.7704	3.32393	2.71498	2.83041	2.85761	2.4527	2.6734	2.47721
CG8010	3.79803	3.81625	3.91235	4.02853	4.1783	4.18052	4.14117	4.06595	3.98538	4.45663	4.23177	4.33242	3.90531	4.01359	3.93459	4.09923	4.17643	4.09193	4.02615	4.07042	4.00123	4.18986	4.12693	4.14014	3.84864	3.86855	3.78352	3.9149	4.28019	4.0812	3.76744	3.99263	3.78024	3.82417	3.90529	3.87545
Gs2	9.25011	9.214	9.31579	9.30015	9.09242	9.3328	9.53482	9.52567	9.58233	9.03954	9.208	9.34111	9.09665	9.25527	9.16754	9.32464	9.14446	9.21511	9.31465	9.38893	9.36209	9.28496	9.17948	9.06441	9.2902	9.33206	9.30328	9.45652	9.28286	9.59727	9.58396	9.53405	9.5405	9.33402	9.40755	9.31426
SF2	4.98753	5.09119	5.12153	5.28662	5.2601	5.26792	5.15278	5.04856	5.14163	5.31905	5.18721	5.27942	5.17742	5.24591	5.15639	5.36829	5.16787	5.35562	5.12963	5.23982	5.19869	5.36505	5.33316	5.36215	5.20114	5.22098	5.18215	5.36632	5.26713	5.38808	5.28898	5.25581	5.23521	5.35891	5.34603	5.47448
Hsromega	3.94655	3.94354	3.93306	4.09022	4.11479	4.04664	3.93506	3.96469	3.90363	3.9295	3.89285	3.89537	3.9839	4.01489	4.22346	3.95089	3.82205	4.10929	3.8848	3.85859	3.86934	3.89219	3.90485	3.86494	3.95312	4.02967	4.00543	4.04097	4.21163	4.30012	4.12175	3.9327	4.10518	3.71982	3.92668	4.02495
CG8925	3.45544	3.35961	3.42742	3.3607	3.32676	3.16321	3.32866	3.23521	3.40438	2.96511	2.9957	2.93818	3.27383	3.61035	3.3981	3.45147	3.34318	3.36234	2.9976	2.91034	3.127	3.04895	3.08813	3.10518	3.47459	3.53425	3.57427	3.47846	3.46538	3.53328	3.22127	3.2709	3.28972	3.20112	3.42081	3.19327
CG31650	5.20988	5.2089	5.17782	5.05912	5.03096	5.06403	5.06101	5.09465	5.14607	4.97796	4.9326	5.03251	5.15726	5.14748	5.20024	5.11705	5.23883	4.99047	5.10855	5.12471	5.19023	5.29585	5.19248	5.1556	5.29447	5.28179	5.25754	5.23605	5.28636	5.3531	5.31914	5.22166	5.21194	5.34873	5.22671	5.24983
CG4806	3.56261	3.72927	3.71738	3.80081	3.82816	3.89511	3.8353	3.75361	3.70673	4.00415	3.98521	4.01411	3.61795	3.69897	3.69807	3.75457	4.09936	3.69731	3.65134	3.65508	3.67197	3.81398	3.80702	3.82217	3.80719	3.71997	3.78959	3.78625	4.01178	3.88255	3.84363	3.73817	3.66827	3.87148	3.87125	3.8413
CG7509	0.602043	0.695702	0.99811	1.18123	1.3043	1.30201	1.56013	1.42961	1.39857	1.10806	1.0655	1.16396	1.21778	0.971178	1.37512	1.4599	1.15964	1.7136	1.71676	1.68755	1.8201	1.4252	1.49777	1.4059	0.82151	1.1492	1.24973	1.29539	1.39663	1.04252	1.84796	1.5681	1.74171	1.3134	1.09127	1.338
PO45	4.20503	4.33033	4.46064	4.77651	5.05158	4.54732	5.02887	4.35688	4.63698	3.52436	3.14391	3.65316	4.48387	5.00906	4.89353	5.01901	4.91646	4.84446	4.66277	4.66252	4.4253	3.98202	3.88761	3.45157	4.7503	4.91922	4.47081	4.88021	4.47837	5.01714	4.49116	4.54271	4.56022	3.92873	4.15606	3.72991
CG14946	2.9797	2.96721	3.11953	2.76924	2.93512	3.21347	3.07045	3.12584	3.21199	2.76262	2.54383	2.71076	3.05257	3.06692	3.38083	3.19332	2.88891	3.09041	3.22589	3.40792	3.26772	2.98542	3.12093	3.05379	3.31032	3.32797	3.3339	3.39542	3.32429	3.75262	3.57808	3.2318	3.33498	3.25633	3.09977	3.03011
CG1463	2.42814	2.43365	2.38993	2.53372	2.72275	2.68544	2.35911	2.44095	2.47676	2.49966	2.6684	2.61036	2.55325	2.43856	2.49214	2.42923	2.62768	2.49051	2.37787	2.47848	2.40097	2.38479	2.5314	2.63467	2.33922	2.49287	2.36576	2.58392	2.53935	2.63869	2.4569	2.44331	2.50755	2.54526	2.71782	2.55498
CG8412	3.96182	3.85651	3.83853	3.94835	4.02497	4.00259	3.87749	3.97781	3.94469	3.78725	3.87842	3.86669	3.91989	3.94964	3.91242	4.0221	3.85968	3.97362	3.74707	3.80688	3.79589	3.89999	3.89178	3.90143	3.92619	3.97022	3.86709	4.07615	4.01687	4.18125	4.10647	4.00911	3.92562	4.03645	4.05436	3.97918
TfIIA-L	5.21075	5.21343	5.25889	5.38915	5.31334	5.43166	5.28616	5.32542	5.33834	5.36458	5.3804	5.54742	5.20304	5.33832	5.21875	5.34486	5.28107	5.33307	5.17775	5.21165	5.20833	5.16909	5.2576	5.30489	5.28259	5.26104	5.26305	5.4204	5.5191	5.51119	5.38935	5.35007	5.41692	5.25329	5.40687	5.32737
Cam	6.75419	6.79205	6.72672	6.65451	6.66434	6.71175	6.6424	6.71816	6.67332	6.76711	6.83583	6.78862	6.54749	6.44616	6.70467	6.86497	6.70402	6.85213	6.60874	6.65555	6.69632	6.73871	6.70787	6.74524	6.79343	6.69051	6.46774	6.87823	6.723	6.85214	6.89782	6.80836	6.76487	6.59799	6.59084	6.69669
CG6254	2.29931	2.34846	2.25243	2.63019	2.68956	2.57387	2.45199	2.34639	2.48743	2.55307	2.54127	2.4251	2.49329	2.36437	2.49268	2.42584	2.79148	2.51046	2.26431	2.45197	2.47767	2.56402	2.54627	2.53253	2.58669	2.38285	2.36423	2.62571	2.62905	2.72743	2.66542	2.40641	2.51755	2.57209	2.46063	2.67839
CG9497	4.46565	4.50794	4.54549	4.58608	4.50464	4.62596	4.84012	4.58652	4.8878	4.2047	4.02659	4.16945	5.15209	5.54016	5.19468	5.10726	4.86164	5.02235	4.65814	4.82054	5.25826	4.77523	4.70992	4.52844	4.89634	5.60094	4.945	5.04194	4.90887	5.40255	4.67931	4.62009	5.01183	4.75553	4.83297	4.75474
kune	4.81385	5.03778	4.87898	5.27137	5.441	5.27758	5.05934	5.15782	5.02793	5.37669	5.02989	5.23169	5.02491	5.05868	5.14122	5.30498	4.73156	5.15652	5.0065	5.10857	5.04072	5.08097	5.17626	4.96845	5.01555	5.02997	5.08319	5.24087	5.36866	5.34359	5.30951	5.07669	5.13156	5.06829	5.21246	5.25327
Grip75	2.82319	3.02232	2.97351	3.2023	3.20732	3.21703	3.09481	3.11278	3.08373	3.10587	3.12604	3.14473	3.13705	3.14615	3.09572	3.3316	3.14025	3.32032	3.14979	3.15604	3.19037	3.16668	3.08759	3.26102	3.22821	3.24966	3.20622	3.28346	3.37628	3.38544	3.27016	3.17372	3.14713	3.27582	3.10041	3.3128
CG9372	5.99234	6.04673	6.07741	6.1753	6.40218	6.0311	5.86299	5.85617	5.97352	5.69535	5.538	5.69666	5.87853	6.046	5.995	6.25106	5.95774	6.13001	5.54306	5.74214	5.59677	5.26871	5.35892	5.17169	5.88179	5.97324	5.89654	6.15189	6.2386	6.36272	5.92172	5.81143	5.89406	5.37277	5.54334	5.4708
Haspin	3.76518	3.82575	3.86562	4.10644	4.09706	4.0202	3.77888	3.87029	3.85264	3.9259	3.97326	3.79296	3.80134	3.83233	3.68436	3.94591	3.43859	3.95791	3.66158	3.97481	3.8338	3.93973	3.91814	3.9747	3.85773	4.04376	3.84015	4.11935	4.08168	4.05167	4.15618	4.04415	3.97251	4.05548	3.902	4.14186
Nmd3	4.53057	4.5468	4.75183	4.77873	4.72373	4.8624	4.69709	4.75381	4.67728	4.87326	4.97122	5.02971	4.60508	4.74273	4.578	4.66153	4.87885	4.69542	4.51518	4.71394	4.66232	4.55929	4.69617	4.71206	4.47096	4.53201	4.48135	4.67521	4.69083	4.7019	4.59745	4.64171	4.64497	4.56995	4.69993	4.69071
daw	4.78801	5.05667	4.70175	5.00122	4.39907	4.84741	5.406	4.97955	5.29698	4.1247	4.26493	4.3531	4.54257	4.45948	4.4842	4.4504	4.69114	4.68148	4.92348	4.99385	4.7432	4.6644	4.57152	4.66259	5.21878	5.05202	5.04434	4.88742	4.50609	4.68655	4.99052	5.08693	5.12396	5.05682	4.64143	4.81543
cactin	3.24438	3.17605	3.32656	3.48716	3.57779	3.59445	3.38538	3.34423	3.46405	3.48577	3.53645	3.51971	3.12564	3.3345	3.13815	3.32091	3.53749	3.25334	3.27244	3.27753	3.2844	3.33366	3.24042	3.37472	3.16969	3.26838	3.30485	3.3144	3.58548	3.38637	3.30619	3.3991	3.16345	3.24197	3.23716	3.3876
ns1	3.81467	3.92648	3.98968	4.04019	4.25008	4.21299	4.03529	4.01203	3.87409	4.22415	4.22071	4.17897	3.96308	3.98938	3.83792	3.91476	4.31182	3.96261	3.85965	3.9034	3.8624	4.04825	4.16357	4.16849	4.01336	4.06916	3.95598	4.10583	4.24084	4.1408	3.97664	3.88004	3.97992	4.08748	4.11466	4.11953
CG5073	5.62145	5.60331	5.66814	5.57144	5.5151	5.59088	5.53885	5.50217	5.44743	5.86142	5.70899	5.73865	5.70461	5.77165	5.74914	5.73455	5.39863	5.68014	5.49747	5.51493	5.53998	5.87556	5.93623	5.94557	5.67757	5.70545	5.61182	5.5946	5.58716	5.64762	5.6115	5.45314	5.50871	5.82003	5.79127	5.86098
CG1998	4.52384	4.4584	4.5029	4.4193	4.33521	4.447	4.42201	4.50796	4.53014	4.71223	4.56847	4.63115	4.56031	4.68375	4.44256	4.52524	4.07048	4.53457	4.51426	4.62162	4.53421	4.90111	4.77693	4.73579	4.41349	4.4183	4.3772	4.40168	4.43436	4.54792	4.50417	4.5753	4.55106	4.73624	4.72808	4.74376
sec23	5.61377	5.58354	5.60259	5.69437	5.75876	5.76387	5.7295	5.75561	5.70209	5.89487	5.7197	5.78119	5.65945	5.79362	5.59656	5.6425	5.6958	5.70781	5.57816	5.64623	5.50823	5.6448	5.64481	5.66175	5.59568	5.57617	5.62004	5.72342	5.73812	5.75198	5.57282	5.65832	5.68379	5.62297	5.65284	5.63358
CG9815	0.995893	0.642134	1.20858	0.997815	1.17769	1.0324	2.26332	1.87105	2.0034	2.5774	1.6895	1.9654	1.0087	0.759083	0.146163	1.11042	1.07099	0.498275	1.95077	1.91707	2.11407	1.0716	1.60748	1.369	0.503699	0.339041	0.367997	0.949427	1.27889	1.19217	2.49698	2.34024	2.47081	1.55026	1.69845	1.1801
MFS17	4.52906	4.49141	4.51796	4.81948	4.76562	4.82938	4.57103	4.63039	4.68704	4.52645	4.56754	4.51491	4.65247	4.41532	4.43005	4.64708	4.24061	4.56169	4.37175	4.45825	4.50396	4.57195	4.59844	4.53466	4.79712	4.76558	4.71564	4.83645	4.58278	4.83255	4.93956	4.72661	4.8209	4.77513	4.80411	4.95105
CG9175	3.36015	3.3193	3.18867	3.34936	3.19725	3.38932	3.57482	3.50255	3.53102	3.25553	3.305	3.38183	3.24695	3.55787	3.40317	3.56461	3.697	3.36768	3.32666	3.47272	3.51449	3.47664	3.48827	3.61866	3.23918	3.31004	3.23288	3.51944	3.22664	3.48815	3.48258	3.54283	3.51985	3.53086	3.56232	3.55113
proPO-A1	4.1765	4.4633	4.5976	5.21062	5.18219	4.84784	5.2772	4.53917	4.89127	3.23621	2.99396	3.79494	4.44421	5.02425	4.97896	5.26302	4.87699	4.97406	4.56329	4.68883	4.35175	3.66123	3.74222	3.44006	4.86487	5.14762	4.59074	5.07398	4.61263	5.11056	4.70678	4.64269	4.66695	3.92039	4.15166	3.74115
Rad23	5.65712	5.67816	5.66563	5.91425	6.14903	5.96208	5.72958	5.82337	5.78562	6.16879	5.90952	5.94548	5.76519	5.75042	5.62564	5.7994	5.48965	5.86277	5.60584	5.77915	5.72407	5.80144	5.79785	5.84677	5.69599	5.68151	5.63316	5.80102	5.9761	5.93356	5.77219	5.7195	5.72385	5.82489	5.74714	5.97671
CG11859	4.03001	3.96308	4.10297	4.32978	4.20999	4.41497	4.16856	4.12909	4.12183	4.27431	4.28568	4.32648	4.10049	4.00714	4.00566	4.06664	4.1895	4.10314	3.96464	4.00034	4.01065	4.06181	4.18593	4.22315	4.02574	4.06449	3.9984	4.02298	4.12544	4.17071	4.03928	3.91702	3.97336	4.05877	4.04288	4.05404
CG15553	3.55171	3.61588	3.60239	3.87561	4.16178	3.77141	3.33553	3.54866	3.46617	3.85393	3.82876	3.98439	3.52777	3.16712	3.49871	3.3166	2.43512	3.56222	2.56201	2.94589	3.14847	3.21928	2.85526	3.08613	3.73225	3.86064	3.60981	3.89098	3.93452	4.08824	4.04619	4.02674	3.8722	3.39282	4.18163	3.73388
CG6834	3.48756	3.57631	4.03914	4.25959	3.8453	4.24224	3.92294	3.91733	3.69014	2.585	2.72486	2.93154	3.56599	3.72019	3.51213	3.86451	3.56029	3.70773	3.22092	3.39531	2.63415	2.53781	2.43913	2.67827	4.06662	4.21043	4.14945	4.34641	4.11293	4.08445	3.9595	3.75346	4.05612	3.15523	3.1932	3.10188
Grasp65	4.51815	4.50457	4.64162	4.62081	4.5615	4.70226	4.77101	4.75199	4.78179	4.89683	4.76994	4.72963	4.42119	4.669	4.47161	4.60023	4.40789	4.52964	4.4671	4.45295	4.47274	4.49342	4.58441	4.60645	4.45844	4.43363	4.42463	4.61387	4.6466	4.64948	4.44824	4.55529	4.57155	4.47268	4.65053	4.55833
stl	0.744289	0.691856	0.911262	1.24755	0.596138	0.486323	1.28748	1.128	1.45163	1.78479	1.68161	1.57055	0.339442	0.497606	0.559672	0.352328	0.364489	0.405715	0.614189	0.706207	0.574661	1.54564	2.17397	2.28552	0.945726	0.874191	0.746331	0.664934	0.829032	0.947557	0.68642	0.824636	0.820673	2.07663	2.1269	1.64233
Aats-asp	4.99585	5.06863	5.25733	5.31021	5.30724	5.51921	5.21879	5.2705	5.23997	5.41494	5.41055	5.52675	5.25054	5.38147	5.23953	5.21827	5.51248	5.33138	5.25605	5.18556	5.24623	5.24712	5.34319	5.36021	5.02627	4.9908	5.06524	5.27325	5.30308	5.29843	5.08273	5.15848	5.21874	5.10072	5.11604	5.20976
CheB53b	1.82398	-0.142241	0.440871	2.08812	2.42347	1.8121	0.540127	-0.28284	-0.423048	1.20087	1.02315	0.962772	1.48669	1.12898	1.56738	3.06131	1.91101	1.9564	-1	-1	0.616587	0.735461	0.679879	0.892492	0.945061	0.973815	1.29578	2.5983	2.16633	2.32311	1.88022	2.00511	1.2169	-0.23582	1.08688	-0.678891
Fmo-2	5.677	5.89532	6.02991	5.14974	5.27843	4.93002	4.67619	4.93356	4.73473	5.54054	5.53783	5.34051	5.98072	5.8637	5.74272	5.28691	5.38132	5.14856	4.92533	5.00389	4.94379	5.0519	5.15338	5.20243	5.7355	5.57309	5.7347	5.22794	5.3438	5.26016	4.96461	4.69481	4.92431	4.81159	4.9287	4.8307
CG1461	7.66483	7.7054	7.73569	7.71816	7.54396	7.43584	7.87248	7.88536	7.88609	6.91229	7.09469	7.2238	7.32734	7.66413	7.5973	7.82176	7.40726	7.55806	7.09141	7.49791	7.475	6.65133	6.66075	6.63669	7.23358	7.34367	6.95291	6.9304	7.09555	7.11352	7.11439	7.08704	6.88078	6.23866	6.51537	6.27999
CG10576	6.10168	6.15442	6.24598	6.38184	6.29188	6.47063	6.34378	6.37791	6.29106	6.61913	6.579	6.51761	6.04124	6.11404	5.97906	6.10482	6.33435	6.21855	6.03226	6.09477	6.04562	6.17232	6.30763	6.41181	6.02651	6.01693	6.02888	6.17584	6.27361	6.15485	6.07756	6.07352	6.00949	6.13519	6.20297	6.16484
CG2145	6.63831	6.63585	6.60695	6.55982	6.77856	6.57469	6.3983	6.50868	6.39986	6.65287	6.65042	6.54483	6.51195	6.61596	6.51262	6.38292	6.38291	6.46544	6.13055	6.24681	6.16233	6.18702	6.19301	6.02167	6.443	6.52597	6.46721	6.47264	6.62633	6.55171	6.35949	6.46716	6.41635	6.19197	6.34427	6.28298
mrn	2.25201	2.09779	2.16581	2.45291	2.3722	2.42065	2.30184	2.17245	2.22961	2.84083	2.24931	2.3025	2.22897	2.28397	2.24821	2.4268	2.26928	2.38614	2.26833	2.17673	2.18369	2.46948	2.5611	2.83317	2.30145	2.25155	2.37355	2.51169	2.62416	2.52676	2.05362	2.18443	2.27826	2.26234	2.41657	2.34221
CG30154	4.41746	4.48054	4.69754	4.87968	5.09738	5.26859	4.72399	4.81861	4.7644	5.59419	5.39594	5.49078	4.5024	4.3342	4.44257	4.25123	4.19734	4.45396	4.26403	4.5614	4.29996	4.4057	4.6979	4.61649	3.76586	3.81243	4.00595	4.19184	4.42138	4.34634	3.97174	3.8867	4.33785	4.2395	4.2192	4.41235
Nnp-1	2.74419	2.90276	2.91002	3.16492	2.60846	3.2472	3.04184	3.13382	3.03904	3.16919	3.2923	3.20196	2.89805	2.87081	2.91929	2.89784	3.00088	2.94334	2.80979	2.80557	2.8691	3.0615	3.11722	3.31061	2.87911	2.87901	2.82803	2.94644	2.76825	3.00562	2.76451	2.55888	2.77042	3.01478	3.04842	3.08521
CG30281	1.36561	1.72121	1.83111	1.93547	2.17486	2.18195	1.25173	1.56828	1.37964	3.5472	2.73814	2.73633	2.04259	2.30684	1.8471	1.89497	1.91572	2.00803	1.74226	2.11842	1.79765	1.96474	2.90817	2.84101	0.87904	0.913303	1.34537	1.27325	1.19127	1.17844	1.3272	1.62916	1.51822	1.69145	1.82642	1.72306
Nup50	3.12268	3.08865	3.2139	3.4236	3.51914	3.55067	3.24993	3.26391	3.2375	3.85314	3.49599	3.59525	3.25011	3.41116	3.16787	3.30381	3.53182	3.2487	3.04586	3.09277	3.10657	3.28903	3.43713	3.54619	3.13055	3.06719	3.13396	3.20672	3.43469	3.19369	2.99887	3.00763	3.09514	3.29855	3.23618	3.35253
CG7889	2.15365	2.14219	2.20356	2.37211	2.53616	2.41763	2.27504	2.18499	2.31976	2.90235	2.6326	2.59261	2.38702	2.28997	2.09061	2.24169	2.33437	2.30097	2.14229	2.193	2.19742	2.06242	2.38412	2.54343	2.19843	2.32261	2.29634	2.31981	2.62415	2.54114	2.28951	2.23867	2.26005	2.49423	2.3623	2.31068
CG12082	3.84093	3.78202	3.87036	3.93728	3.83472	3.95763	3.91351	4.01624	3.90334	4.24907	4.13028	4.1483	3.51506	3.69871	3.39098	3.58036	3.75218	3.58011	3.46992	3.48893	3.49589	3.49199	3.75809	3.90071	3.48103	3.40083	3.46861	3.68373	3.84514	3.72273	3.54059	3.66125	3.7126	3.64492	3.79183	3.76581
CG11926	4.08404	4.10489	4.1211	4.23247	4.21779	4.32563	4.16669	4.1495	4.20074	4.17301	4.07123	4.28901	4.00692	3.99667	3.98477	4.07251	4.18525	4.14418	3.94313	4.07141	3.94852	3.92524	3.96754	4.07485	3.91608	3.92471	3.87157	3.96477	4.06179	4.12891	3.91832	3.96623	3.92406	3.9149	3.90694	3.98472
CG4203	2.76882	2.80888	2.84034	2.9578	2.95802	2.94748	2.90047	2.91073	2.89938	2.77003	2.84828	3.04832	2.74141	2.99738	2.79317	2.87882	2.88678	2.93102	2.66381	2.68961	2.83268	2.80429	2.90431	2.85379	2.75567	2.72669	2.78176	2.87226	2.83433	2.85217	2.76795	2.85361	2.86323	2.79168	2.89278	2.81092
CG8539	4.49883	4.40817	4.52044	4.85134	4.7139	4.74947	4.65538	4.74704	4.76676	4.53808	4.37602	4.53539	3.98814	4.09468	4.10468	4.48659	4.33813	4.47961	4.1114	4.39585	4.32898	3.64508	3.96497	3.80229	3.98507	4.1072	4.10427	4.42734	4.26328	4.32995	4.60212	4.54659	4.54902	3.83613	4.09458	4.0898
CG11417	2.85831	2.89707	2.84205	3.09592	3.37097	3.31189	3.18299	3.08057	3.08045	3.33817	3.24527	3.41905	2.72904	2.95134	2.56995	2.82396	3.32837	2.89812	2.78831	2.75729	2.88553	2.98803	2.93794	3.04413	2.62646	2.69258	2.56961	2.87974	2.98563	2.99769	2.78412	2.93005	2.78742	2.93266	2.91279	2.87862
Pabp2	3.62276	3.76717	3.87483	4.16533	4.03074	4.15004	4.10254	4.15782	4.10576	4.28674	4.1573	4.24877	3.82297	3.82132	3.8211	4.08801	4.06835	4.10304	3.64966	3.75132	3.82398	4.16594	4.11029	4.24832	3.86391	3.85618	3.93417	4.18521	4.18141	4.09905	3.87341	3.82713	3.86217	4.07108	4.22978	4.21571
CG17486	5.42361	5.53654	5.42786	5.71566	5.64547	5.66955	5.45655	5.51004	5.497	5.36181	5.38614	5.41324	5.20332	5.17209	5.09542	5.24804	4.7914	5.34304	5.11087	5.24326	5.1783	5.18435	5.15951	5.25323	5.21888	5.2949	5.17917	5.45321	5.38703	5.44238	5.36921	5.14214	5.22306	5.2731	5.22605	5.37148
Hsp60	6.97834	6.94397	7.06219	6.98865	6.98457	6.95485	7.09096	7.1038	7.16036	7.35344	7.25906	7.16945	6.77455	6.85147	6.72983	6.72976	7.01584	6.7503	6.82479	6.80649	6.87983	6.96327	6.96159	6.98795	6.78645	6.74219	6.78614	6.83355	6.96018	6.98152	6.76745	6.91307	6.82471	6.92164	7.03748	6.94407
crok	2.94805	3.0468	3.02805	3.41099	3.63243	3.36332	3.24903	3.27593	3.31333	3.58569	3.32393	3.61766	3.08413	3.35063	3.1937	3.42769	3.01653	3.35177	3.06412	2.94569	3.17855	3.28685	3.17645	3.14747	3.04287	3.05513	3.12582	3.26491	3.50538	3.56061	3.25718	3.1402	3.18956	3.2608	3.39907	3.411
CG7262	2.62873	2.61124	2.67933	2.76828	2.78927	2.90571	2.76578	2.71658	2.51749	3.14544	2.92625	2.99783	2.75565	2.89787	2.71364	2.74146	2.73991	2.67937	2.70862	2.69764	2.66084	2.68222	2.82431	2.91301	2.58915	2.61397	2.57045	2.78669	2.93244	2.70298	2.57482	2.60683	2.60716	2.67244	2.7402	2.77926
CG17646	6.23946	6.32234	6.26659	5.80492	5.36688	5.84818	5.42453	5.43881	5.5463	5.02834	5.07245	5.1569	5.85458	5.89457	6.01041	5.36216	5.27236	5.52734	4.79067	4.95897	4.95588	4.93264	5.06724	5.02134	6.122	6.13596	6.04409	5.73819	5.37874	5.65876	5.49037	5.54223	5.60569	5.03782	5.18225	4.99711
Lip4	4.57331	4.18482	4.53017	4.7717	4.3513	4.61613	4.53604	4.71967	4.9872	5.07168	5.1234	5.24252	4.61886	4.92129	4.64063	4.61187	4.38655	4.74176	4.63393	4.69922	4.53631	4.68808	5.25207	4.83813	4.54435	4.55868	4.69138	4.63976	4.84944	4.68111	4.39923	4.56129	4.80823	5.11075	5.2136	5.17774
ppk10	0.426299	0.324032	0.147445	1.26354	0.981733	0.615524	0.13478	-0.22567	-0.0233615	1.03758	0.44553	1.14078	0.354887	0.607891	0.132265	1.52895	0.470059	0.897779	-0.435844	-0.340037	-0.173818	-0.154544	0.299196	0.60506	0.583911	0.725543	0.395162	1.36399	1.31787	1.32973	1.43075	1.05738	1.12428	0.421795	1.0382	0.293441
CG14196	4.90668	5.06421	5.10805	5.06998	5.25123	5.34033	5.26715	5.38659	5.28927	5.11225	5.17389	5.18985	4.84124	4.91583	4.6956	4.78614	4.77564	4.83789	5.0125	4.90878	4.8629	4.73542	4.68649	4.64272	4.42329	4.44116	4.40763	4.59537	4.6438	4.66786	4.53518	4.72828	4.58489	4.4218	4.4246	4.47622
Rtc1	2.74891	2.67999	2.78743	2.90835	2.81913	2.96271	2.83259	2.89127	2.93128	3.10561	3.26915	3.17892	2.77325	2.70273	2.71055	2.78601	2.80448	2.64305	2.57029	2.59493	2.69415	2.8445	2.82499	2.90379	2.73935	2.64582	2.59579	2.83417	2.78135	2.8253	2.71141	2.85358	2.63972	2.77374	2.79854	2.80107
CG43094	2.30171	2.31079	2.08073	1.88187	1.98444	0.886934	0.753555	1.23947	0.845131	1.79826	1.69671	1.68467	1.95643	3.01209	2.00383	2.42233	0.829319	1.92361	-0.0280856	0.946829	1.38975	1.08323	1.2197	1.15907	3.17666	3.75496	2.90075	2.1906	1.88467	2.50503	1.60306	1.71357	1.63036	1.50987	2.60008	1.90828
CG7523	5.4184	5.26006	5.52402	5.6027	5.61525	5.73294	5.39682	5.44546	5.36958	5.8007	5.74169	5.81814	5.03476	5.21411	5.04693	5.23566	4.95176	5.27357	4.99247	5.16912	5.12662	5.27414	5.2923	5.30743	5.05011	5.01432	5.02757	5.25637	5.36646	5.27528	5.18852	5.22106	5.27301	5.31938	5.46118	5.48164
CG15445	3.99963	4.05217	4.09065	4.33888	4.19297	4.28661	4.15116	4.23982	4.20098	4.40548	4.38412	4.45615	3.78305	3.93544	3.63819	3.80324	3.80847	3.84469	3.65932	3.82472	3.73428	3.93442	3.94909	4.12617	3.76227	3.58048	3.671	3.89392	3.90616	3.93507	3.78112	3.73886	3.80326	3.76849	3.97587	3.92949
CG7845	2.51486	2.61682	2.74779	3.12085	3.01235	3.12198	3.02865	3.12867	2.74744	3.2159	3.16522	3.20717	2.7362	2.63641	2.87363	2.81956	2.72895	2.81585	2.62245	2.57318	2.69181	2.85949	2.82357	2.88846	2.64318	2.6888	2.63054	2.8533	2.88608	2.94299	2.68232	2.51035	2.67298	2.92573	2.89009	3.0005
CG30349	3.4744	3.5936	3.64668	3.77228	4.09006	3.78405	3.73411	3.78673	3.76028	4.21967	4.00314	4.11271	3.3855	3.41107	3.40296	3.38386	3.79097	3.55692	3.37955	3.32488	3.25486	3.64062	3.57709	3.62881	3.2853	3.24804	3.38842	3.50048	3.73278	3.68827	3.32955	3.27028	3.35695	3.44011	3.60904	3.46347
Nsun2	2.92552	2.90583	2.99996	3.03774	3.13296	3.21412	2.99087	3.21142	2.95582	3.18422	3.22926	3.35743	2.75548	2.88471	2.82795	2.78055	3.27865	2.86292	2.71506	2.84887	2.7705	2.91822	2.95134	3.00539	2.7844	2.87026	2.72582	2.98741	2.938	2.91506	2.67383	2.65356	2.71938	3.02277	2.92897	2.93334
CG12128	2.07929	2.02184	2.07947	2.32321	2.51345	2.40322	2.12339	2.21531	2.24218	2.58712	2.39097	2.38021	2.06993	2.07881	1.99519	2.17809	2.34595	2.21002	1.97177	2.00181	2.09471	2.13053	2.30367	2.40151	2.05835	2.12247	2.09178	2.17385	2.35623	2.34457	2.12533	2.06501	2.00292	2.28745	2.19835	2.15544
CG1635	4.79718	4.87494	4.84893	4.93951	5.09156	4.97523	4.71798	4.74822	4.73212	5.12752	4.8531	5.03775	4.48997	4.50797	4.41285	4.47105	4.49148	4.42559	4.31611	4.42942	4.43513	4.48857	4.50648	4.4283	4.41528	4.48673	4.41159	4.46039	4.59425	4.69241	4.46564	4.50419	4.45745	4.42938	4.51469	4.61331
CG4335	5.0125	5.08695	5.07444	5.08405	5.12893	5.09021	5.28289	5.32618	5.2669	5.08707	5.04019	4.8743	4.91939	4.94132	4.94298	4.74001	4.26587	5.00541	4.47863	4.72744	4.65035	4.56838	4.48302	4.53549	4.90853	5.16283	5.22227	4.94592	5.13263	4.79326	4.83552	4.90073	4.79139	4.8186	4.88476	4.92994
CG12268	3.35748	3.39698	3.58003	3.07457	2.85091	2.93437	2.22593	2.6456	2.46437	2.93786	3.36342	3.09103	2.1386	2.32926	2.18357	2.51421	2.25873	2.33673	2.49686	2.78292	2.81657	1.94549	2.20603	1.86584	1.90352	1.9802	2.00487	2.14667	1.92754	2.32351	2.8175	2.65606	2.60721	1.8928	2.22225	2.11665
CG14529	1.13781	1.58737	1.36321	0.570078	0.343929	0.895729	0.5707	0.465524	0.331396	1.50304	1.57995	1.44353	1.50921	1.09081	0.821754	0.136652	1.14899	0.376137	0.0872048	0.13278	-0.160721	0.981676	0.930094	1.49411	1.30923	1.02396	1.07754	0.0651147	0.238339	0.475576	-0.225337	-0.0503381	-0.00671337	0.98122	0.867862	0.456456
CG10433	9.00693	8.96958	9.0827	8.59095	8.68049	8.71383	8.17877	8.30055	8.1826	9.01857	8.56493	8.75338	8.64829	8.73058	8.6477	8.02009	7.87606	8.16317	7.76437	7.92679	7.91706	8.45184	8.46855	8.32268	8.73637	8.76163	8.81586	8.25085	8.42194	8.45522	7.91727	8.01191	8.06033	8.36515	8.3388	8.4997
CG5853	5.42957	5.28447	5.48234	5.04549	4.35807	4.70048	5.31627	5.32465	5.4978	5.71436	5.86192	5.91944	4.84203	4.7225	4.78753	4.23995	4.20655	4.48913	4.80093	5.12859	5.0144	5.48315	5.6311	5.6768	5.08858	5.0262	4.88127	4.14848	3.98359	4.0315	5.23058	5.44718	5.18782	5.84342	5.90239	5.97204
Karl	3.9727	4.1743	4.07955	4.28971	4.68199	4.50748	4.12549	4.40959	4.30219	3.86222	3.49922	4.0529	3.66234	3.92818	4.11251	4.10186	4.07266	4.12865	3.86023	3.95831	3.80068	3.25395	3.33164	3.21536	4.09229	4.03966	4.12181	4.30835	4.14626	4.23772	4.15397	3.86898	4.12075	3.78475	3.74613	3.63399
Lasp	2.32978	2.53399	2.67441	2.75708	2.79502	2.46464	2.00779	2.23177	2.13566	3.01412	2.68791	2.80173	2.32335	2.3502	2.48662	2.37749	1.70996	2.53277	1.93359	2.09925	2.111	2.53942	2.48708	2.46527	2.62706	2.51408	2.46591	2.38806	2.65468	2.68803	2.33467	2.14071	2.26044	2.4082	2.60928	2.69963
Wwox	3.55042	3.47947	3.59548	3.70129	3.75255	3.61066	3.48985	3.53699	3.49761	3.8495	3.7425	3.85783	3.08049	3.1604	3.16224	3.05339	3.0718	3.18892	2.78754	3.06726	3.01203	3.23307	3.27996	3.10989	3.14747	3.29273	3.17932	3.31344	3.31948	3.46529	3.1224	3.10304	3.33281	3.26749	3.39835	3.31695
CG3165	2.92641	2.91824	3.01765	3.31133	3.4075	3.5736	3.08411	3.04629	3.11061	3.61545	3.05183	3.32224	2.78128	2.86094	2.78966	2.8198	2.95296	2.91769	2.82866	2.74057	2.79634	2.72363	3.04471	3.47186	2.68625	2.58157	2.64633	2.96335	3.19235	3.25578	2.91536	2.90076	2.86481	2.77532	2.96756	3.02234
CG7033	5.36031	5.44034	5.50209	5.7053	5.68371	5.84526	5.6117	5.74279	5.54108	6.0308	5.9045	6.20238	5.16791	5.20141	5.10171	5.19906	5.37868	5.16562	5.26475	5.29302	5.27621	5.2508	5.32736	5.43314	4.99615	5.0508	5.16105	5.29553	5.35079	5.27875	5.20412	5.27942	5.18185	5.22836	5.30206	5.38028
Tcp-1zeta	5.68552	5.63697	5.71203	5.89171	5.86682	6.02755	5.8248	5.9019	5.7898	6.18391	6.01963	6.24686	5.33785	5.35543	5.2985	5.45146	5.42875	5.42255	5.49556	5.50533	5.4595	5.46714	5.41059	5.50746	5.223	5.20354	5.23922	5.42976	5.55287	5.51603	5.40418	5.48438	5.44072	5.36776	5.42332	5.40363
CG11123	2.69112	2.6047	2.6642	2.88441	2.9018	2.97703	2.80773	2.87753	2.66236	2.97278	2.97199	2.86994	2.53098	2.5356	2.39192	2.44105	2.70625	2.57104	2.34341	2.36301	2.3051	2.44675	2.5529	2.71745	2.62722	2.49576	2.56454	2.87608	2.78263	2.83193	2.61432	2.45341	2.60006	2.6071	2.68143	2.7358
CG2736	7.70742	7.69357	7.78209	7.46605	7.63419	7.57238	7.4857	7.53879	7.51837	7.364	7.27943	7.28375	7.28012	7.1044	7.10065	6.84233	6.48267	6.99606	6.66458	6.88632	6.83941	6.72512	6.80991	6.70551	7.40439	7.37125	7.27303	7.07838	7.20903	7.16474	7.21374	7.23951	7.20155	6.92935	7.05357	7.11556
CSN4	5.0365	4.98999	4.98412	5.29319	5.52131	5.41852	5.14801	5.14821	5.03375	5.43872	5.35622	5.43629	4.59652	4.55383	4.42711	4.60949	4.61641	4.73809	4.57603	4.52874	4.44557	4.58575	4.55264	4.66022	4.36604	4.34208	4.32888	4.48988	4.80855	4.65241	4.39747	4.38692	4.41022	4.38484	4.29769	4.4349
CG8449	4.69757	4.67159	4.78638	5.00068	5.06827	5.24336	5.09754	5.11243	5.14563	5.07576	4.89701	4.98039	4.23302	4.37058	4.25514	4.34093	4.46706	4.38997	4.24537	4.35249	4.47765	4.42223	4.43314	4.38028	4.40317	4.42434	4.392	4.51173	4.61228	4.63372	4.46873	4.56716	4.5914	4.52515	4.67028	4.60457
Cct5	5.14128	5.10015	5.32666	5.43529	5.66471	5.67474	5.35537	5.49124	5.2982	6.14639	5.82502	5.95025	4.97062	4.95891	4.939	5.02095	5.23941	4.98443	5.05696	5.02999	5.11613	5.04074	5.191	5.27306	4.75382	4.8372	4.77849	5.08978	5.27764	5.22767	5.02376	5.07403	4.93903	5.08851	5.1878	5.12792
CG10140	-0.23676	-0.0537171	0.318702	0.0819952	0.645755	1.03731	0.173557	0.447142	0.675122	1.30975	1.07891	1.17409	-0.226416	-0.403293	-0.00556278	-0.298035	-0.214692	-0.419678	-0.106653	-0.0113194	-0.0212102	0.197539	0.304467	0.117056	-0.450018	-0.187246	-0.54801	-0.212371	-0.177459	-0.389124	-0.356071	-0.758416	-0.194393	-0.616708	-0.185871	-0.418347
Hsp83	8.60869	8.50612	8.42398	9.19485	8.80378	9.18177	9.24833	9.36862	9.25683	8.87765	8.99498	8.89535	8.54233	8.67372	8.56145	8.72684	9.01233	8.7034	8.66565	8.76901	8.72956	8.56745	8.75074	8.77436	8.50702	8.68352	8.51268	8.9851	8.84409	8.89319	8.72272	8.71986	8.53895	8.62063	8.59695	8.76326
CG15545	0.812708	0.899672	0.793963	1.31678	1.28183	1.15905	1.21491	1.18132	1.09615	1.36637	1.26055	1.03794	1.06222	1.14746	1.16211	1.67294	1.46861	1.31464	1.27517	0.567105	0.961403	1.15442	0.877522	1.01809	1.12289	0.928925	0.947088	1.38388	1.11611	1.37204	0.700505	0.76895	0.933778	0.982289	1.17345	0.975434
CG43175	0.0812429	-0.352599	0.589198	0.466264	0.949346	0.692033	-0.0646335	0.0258594	-0.246656	1.77267	1.72176	3.05303	-0.0337637	0.444389	0.078309	-0.0675449	0.339576	2.04969	0.489575	-0.178636	-0.653047	0.266053	0.946385	0.734683	0.152606	-0.114436	0.221285	-0.304166	0.257404	0.0522187	-0.272822	-0.0143896	0.20363	-0.525345	0.34309	0.257374
CG17508	8.26435	8.2555	8.30414	8.53081	8.57362	8.53801	8.41448	8.38144	8.39756	8.41586	8.25677	8.34237	7.62802	7.63441	7.5254	7.68736	7.25662	7.80318	7.56493	7.71615	7.67203	7.5931	7.55147	7.52179	7.54341	7.58003	7.50046	7.65393	7.82317	7.82287	7.68277	7.60365	7.6211	7.52245	7.55592	7.67107
CG42370	4.36484	3.99208	4.09246	4.64207	4.37995	4.57108	4.67498	4.57268	4.71283	4.54863	4.42099	4.42018	3.77618	3.57823	3.74004	3.92818	3.67561	4.11365	4.07214	4.38181	4.2243	4.20371	4.04772	4.05542	3.27837	3.47254	3.40243	3.41719	3.53418	3.40509	3.8594	4.03771	3.9377	3.86564	4.07237	4.14068
Mal-B1	5.74896	6.18509	6.41134	4.67192	5.70545	4.42052	4.67083	5.62652	4.7918	6.33553	6.58836	5.8899	6.42008	6.6936	6.08242	6.48156	6.89979	6.73963	6.82104	7.32352	6.70269	6.5319	6.89265	6.80503	6.208	6.15336	6.5561	6.21158	6.56804	5.69285	6.9102	6.48875	6.70244	6.8518	7.21109	6.76329
CG31205	5.97277	6.41977	6.0774	4.83188	6.53991	5.94108	4.53987	5.28735	5.75426	4.13403	4.45031	5.15401	7.22347	7.15882	7.15875	7.39129	6.99839	7.09766	6.11311	6.4327	6.30021	6.03422	6.14819	6.00557	7.47859	7.58609	7.46608	7.3185	7.49049	7.51924	6.63108	6.39183	6.42029	6.40019	6.44292	6.57841
CG17843	2.96233	2.89186	2.59105	3.25492	3.13646	2.73124	3.08591	2.98723	2.7847	3.36676	2.60958	2.9268	3.34831	3.26184	3.40598	3.61107	3.55762	3.39812	3.46729	3.57364	3.43596	3.44951	4.06249	3.76376	3.49636	3.49336	3.46725	3.87542	3.64795	4.04773	3.98206	3.82405	3.61117	3.63603	3.51126	3.60363
CG5840	4.52049	4.59899	4.77878	4.86501	5.2381	4.55002	4.66735	4.7524	4.97807	5.46035	5.24144	5.31691	5.91038	5.89143	5.62357	5.91903	5.8391	5.97929	5.94486	6.10697	6.27155	5.63483	6.03304	5.82388	5.74928	5.70378	5.67133	6.05409	6.56272	6.12239	6.13848	6.25036	6.27663	6.07276	6.23459	6.18657
Clk	3.30546	3.39813	3.31891	3.39685	0.985341	3.40232	2.54456	2.47314	2.54391	0.696593	1.92236	1.84827	3.045	3.3293	3.15248	3.28813	2.9496	3.255	1.99231	2.28742	2.02328	1.84857	2.10927	2.43927	3.20536	3.13088	3.06231	3.35992	1.98436	2.76077	2.12198	2.21927	2.18477	1.68677	1.63506	1.65564
Idgf5	5.52332	5.22981	5.33582	5.58055	5.82761	5.602	5.6098	5.43777	5.36208	5.87347	5.69934	5.71578	4.92133	4.9565	4.73064	4.98867	4.92798	5.00218	4.69026	5.02033	5.01709	4.89364	4.94658	4.91847	4.43431	4.38587	4.40986	4.51618	4.96243	4.73404	4.53844	4.58641	4.57932	4.64248	4.77097	4.93638
Tsp42Ed	6.4265	6.39545	7.04079	6.72618	6.80276	7.24713	6.35277	6.46309	6.20421	7.23058	7.08153	7.2257	5.86062	5.8162	5.63692	5.75362	5.513	6.0572	5.79668	5.85779	5.88494	5.85916	6.13167	6.10074	5.65611	5.73094	5.67889	5.87061	6.24273	6.04525	5.75178	5.71369	5.85752	5.94491	5.91749	6.08417
Neurochondrin	6.17692	6.30937	6.225	6.55267	6.61591	6.58029	6.58033	6.5081	6.56886	6.56047	6.63424	7.14971	5.4864	5.4374	5.3263	5.41885	5.65066	5.59086	5.45865	5.61542	5.50267	5.66302	5.51458	5.38721	5.18225	5.05363	5.12628	5.45866	5.52963	5.49906	5.43993	5.42103	5.17937	5.28912	5.32757	5.35566
ver	3.84962	3.78751	4.00056	4.4438	4.98301	4.38274	4.30261	4.39947	4.25927	5.01383	4.41838	4.63919	2.42646	2.36919	2.56193	2.8332	2.73189	2.90709	2.39207	2.53248	2.71892	2.62188	2.79195	2.93496	2.6185	2.5718	2.4041	3.16986	3.48522	3.481	2.88612	2.98597	2.69932	2.75405	3.15909	2.91084
CG13215	0.885274	0.752077	0.502912	0.574831	1.1579	0.586799	1.02773	1.50087	1.26735	2.44093	1.54638	1.88651	-1	-0.59292	-0.900017	-0.839976	-1	-1	-0.785256	-0.904964	-0.745324	-0.477416	-0.608434	-0.379592	-0.879832	-0.92315	-1	-0.849387	-1	-1	-0.677363	-0.569153	-0.820862	-0.430354	0.178737	-0.241893
CG5550	2.58983	3.42539	4.48422	3.02684	3.85388	4.87434	3.74374	3.50309	2.3965	4.32102	4.23379	3.55764	-0.169027	-0.14315	-0.534408	0.191663	0.642127	0.673003	0.0083451	0.0904532	-0.378953	-0.303463	0.197229	-0.178034	-0.397198	-0.553218	-0.37919	2.07216	0.356158	0.819435	-0.611763	-0.414763	-0.0472041	-0.0955076	-0.616062	-0.591186
DptB	6.67292	5.578	6.52935	6.54981	6.18587	7.16868	5.70832	7.92876	5.91558	9.79156	7.86392	9.60418	3.88452	4.41325	2.51073	0.876193	4.54568	4.27472	3.18311	2.33839	2.78543	3.08072	3.08992	4.14309	2.52212	2.05725	2.59224	2.76597	2.0812	1.76284	3.47541	3.24871	1.84863	4.44526	2.74057	4.24792
CG15666	0.0284773	-0.0256511	-0.0915237	0.55605	0.73385	0.344075	0.0446085	0.0779069	0.0096835	0.46137	0.152904	0.3418	0.0893023	0.534807	0.609029	1.04124	1.03541	0.585435	-0.0356575	0.00636734	0.562329	0.23039	0.113176	0.324621	0.320982	0.476828	0.275031	0.688974	0.526679	0.977185	0.760004	0.608927	0.7484	0.248595	0.522265	-0.0203926
CG12017	-0.0160207	-0.0311458	-0.198078	-0.222031	-0.35764	-0.229976	0.133794	0.252238	0.284622	-0.306355	-0.347311	-0.261629	-0.737255	-0.726489	-0.756573	-0.605911	-0.482179	-0.573516	-0.686274	-0.655701	-0.547266	-0.698615	-0.243191	0.0946537	-0.87433	-0.794764	-0.776264	-0.670905	-0.864399	-0.542835	-0.68762	-0.60973	-0.647179	-0.866924	-0.785242	-0.728637
CG15212	-0.848683	-0.912725	-1	-0.355115	-0.390969	-0.277261	-0.705989	-0.435182	-0.845215	-0.699874	-0.861389	-0.902029	-0.750211	-0.350461	-0.736623	-0.78128	-0.657778	-0.814226	-1	-0.638155	-0.7184	-0.31368	-0.275164	-0.396778	-0.618119	-0.702451	-0.474074	-0.453353	-0.162045	-0.196901	-0.0745194	-0.428886	-0.202586	-0.867067	-0.21635	-0.572903
CG14239	0.0120122	-0.0465512	-0.118302	0.611421	0.347846	0.552498	0.0115353	-0.371937	-0.153346	0.186315	0.141004	0.511984	0.291804	0.418516	0.409971	0.841472	0.324329	0.469338	-0.216962	0.0947471	0.108367	0.172186	0.2632	0.0797339	0.0547331	0.0702451	0.158662	0.833872	0.448739	0.74329	0.773703	0.778688	0.46092	0.221043	0.469323	-0.11661
CG13183	-0.467994	-0.168455	-0.455274	-0.289477	-0.148107	-0.261251	-0.384831	-0.378643	-0.599789	-0.592492	-0.685012	-0.738947	0.0565297	0.406602	-0.21181	0.129783	0.359165	0.159033	-0.196649	-0.148241	-0.175098	-0.423416	-0.223583	-0.483681	0.365377	0.291084	0.458614	0.641991	0.303801	0.519327	0.466201	0.153208	0.503454	-0.019549	-0.10728	0.124951
Tsp42Ep	0.949621	1.02211	1.04653	1.33633	2.00594	1.59012	1.95601	1.82384	2.19993	1.37303	1.15893	1.43888	0.700413	0.473386	0.733038	0.641045	0.655713	0.653917	0.560423	0.602073	1.13462	0.190175	0.366276	0.160738	0.0950261	0.54023	0.281178	0.365379	0.827154	0.277867	0.815535	0.946426	0.688578	0.326444	0.42314	0.234637
CG14329	0.432938	0.753364	0.739573	0.986994	1.28308	0.921687	0.227244	-0.19451	-0.206669	0.117295	-0.139295	0.133502	1.02109	0.742665	0.778517	1.28514	0.847675	0.688771	0.0926184	0.132031	-0.3522	-0.144228	-0.268704	-0.23446	1.04907	1.34403	0.999857	1.44408	1.73442	1.82161	0.555985	0.660487	0.812612	0.335048	-0.04359	0.356715
CG14905	-0.8006	-0.620475	-0.588176	-0.139328	-0.27956	-0.393091	-0.7839	-0.756922	-0.686307	-0.511537	-0.594657	-0.599217	-0.45792	-0.397534	-0.597119	-0.289551	0.0205064	-0.298418	-0.588324	-0.455502	-0.633855	-0.697489	-0.476503	-0.405217	-0.208288	-0.120939	-0.228129	-0.0697183	-0.144602	-0.375227	-0.419317	-0.11539	-0.255039	-0.697978	-0.244962	-0.489194
CG13178	-0.0219143	0.293111	-0.245693	0.563524	0.957568	0.256208	-0.125622	-0.12396	-0.101807	0.269568	0.343784	0.175897	0.200049	1.07358	0.24775	1.31145	0.882902	0.542374	-0.044336	0.375343	0.479045	0.717962	0.125808	0.332038	0.42605	1.03073	0.508424	0.9411	0.766535	1.19238	0.78979	0.832636	0.983597	0.217226	0.563827	-0.0202158
malpha	-0.0392411	0.184343	-0.0468741	0.246572	0.55396	0.191734	0.0297053	-0.00620673	-0.466611	0.960644	0.703575	0.108623	-0.16157	-0.46473	0.12869	-0.103075	-0.280889	0.0288235	0.124011	-0.414638	-0.0308087	-0.400127	0.171978	-0.184937	-0.121988	-0.231367	-0.130294	0.0785855	0.171732	0.531685	0.0373506	-0.286816	0.198792	0.299467	0.146481	-0.251206
CG33993	-0.266085	-0.23112	-0.366086	0.0590487	-0.0130584	0.0553231	-0.101731	0.0274298	-0.030006	-0.275262	-0.195086	-0.0517595	0.468364	0.508693	0.720792	0.595083	0.466125	0.411629	0.494262	0.582277	0.468728	0.491189	0.331014	0.475242	0.398103	0.424029	0.213426	0.377407	0.169988	0.0624854	0.19319	0.362024	0.154264	0.0748941	0.369377	0.246909
pnr	1.03294	1.00638	1.13378	1.00793	0.518398	1.17585	1.11897	1.18716	1.304	0.441014	0.505472	0.942971	0.912911	1.23025	1.19908	1.12226	1.10012	1.10715	1.32283	1.08234	1.15256	0.986465	1.00326	0.779657	1.17001	1.25087	1.16227	1.20564	0.786428	1.31751	1.11197	1.28326	1.2893	1.05549	1.02511	1.17857
cyr	-0.862258	-0.890179	-0.814246	-0.794381	-0.819555	-0.779718	-0.94209	-0.815478	-0.913812	-0.676455	-0.780354	-0.717337	-0.829324	-0.85852	-0.874714	-0.877019	-0.866422	-0.896065	-0.834254	-0.903916	-0.840162	-0.828609	-0.813531	-0.583785	-0.835476	-0.79564	-0.576088	-0.812082	-0.77785	-0.722519	-0.771029	-0.748235	-0.804832	-0.746163	-0.804338	-0.692907
Cyp308a1	-0.175973	-0.479531	-0.602763	0.850811	0.790259	0.0616017	-0.55966	-0.475199	-0.440876	0.568202	-0.0119485	-0.0884294	0.23386	1.82472	0.615854	1.47547	1.43327	0.95309	-0.790826	-0.722822	0.928963	-0.360552	-0.316299	0.41764	0.021609	1.23975	0.365043	1.34665	0.839318	1.6638	1.03723	1.23927	1.22784	0.0157991	0.79887	-0.131621
EfSec	0.922884	0.920472	0.84948	1.05065	1.33655	1.07431	0.819411	0.848769	0.851163	1.388	1.12343	1.19754	1.34784	1.25894	1.08766	1.24696	1.00731	1.38738	1.1125	0.776243	1.07011	1.00645	1.10087	1.45852	0.916246	1.04788	1.25263	1.13322	1.2863	1.27431	1.12246	0.978865	1.27975	1.10222	1.18148	1.50679
CG10301	-0.598826	-0.723898	-0.757288	-0.652536	-0.733337	-0.750825	-0.591122	-0.517753	-0.422274	-0.359685	-0.525121	-0.374058	-0.616558	-0.269311	-0.212744	-0.364322	-0.57247	-0.354385	-0.32626	-0.501025	-0.524357	-0.257765	-0.294471	-0.645339	-0.597143	-0.626906	-0.520054	-0.584365	-0.827724	-0.401516	-0.660245	-0.650893	-0.498178	-0.542575	-0.698531	-0.697768
CG8534	-0.930014	-0.883511	-1	-0.860744	-0.750406	-0.840468	-1	-0.872613	-1	-0.727507	-0.460676	0.178487	-1	-0.794147	-0.875636	-0.848954	-1	-0.956115	-1	-0.881741	-1	-0.944642	-0.802518	-0.728085	-0.92346	-0.814414	-0.920721	-0.903704	-0.958058	-0.806559	-0.967959	-0.948441	-0.848695	-0.617388	-0.851911	-0.480342
CR42859	-1	-1	-1	-0.961526	-0.929099	-0.955698	-0.948793	-0.908261	-0.923702	0.556108	-0.80456	-0.861074	-1	-0.850641	-1	-1	-0.93955	-1	-1	-1	-1	-1	0.525044	1.17396	-0.879397	-1	-1	-0.897494	0.113948	-1	-0.965843	-0.892137	-0.95807	-1	-0.945581	-0.820913
Eip63F-2	0.810941	0.945333	0.729467	0.870117	0.819577	0.719146	0.32134	0.268842	0.204413	0.430252	0.329676	0.613567	0.498425	0.232438	0.106621	0.362446	0.336916	0.497056	-0.0453828	-0.00365241	-0.130119	0.127344	-0.123983	-0.213644	0.473465	0.332822	0.403184	0.158799	0.614208	0.356028	-0.178485	-0.253228	-0.227422	-0.0924319	0.00521539	-0.0454907
CG30043	-1	-0.987068	-1	-0.953786	-0.956887	-1	-0.953666	-0.98581	-1	-0.929495	-0.938318	-0.971019	-0.47724	-0.701456	-0.918883	-0.98305	-0.963294	-0.985757	-0.954083	-0.960946	-0.977724	-0.981985	-0.988714	0.796355	-0.98743	-0.892755	-0.923527	-0.805761	-0.715559	-0.774724	-0.861193	-0.934084	-0.742566	-0.36081	-0.966983	-0.902871
CG15479	-0.281083	-0.325466	-0.51177	-0.0308094	-0.0796891	-0.49981	-0.514452	-0.672924	-0.915743	-0.484184	-0.785063	-0.542523	-0.260835	-0.318367	-0.335552	-0.616776	-0.265855	-0.370219	-0.837871	-0.861292	-0.702613	-0.812692	-0.918977	-0.395275	-0.463369	-0.639565	-0.291599	-0.386424	-0.297532	-0.253209	-0.312745	-0.282124	-0.393541	-0.670847	-0.488335	-0.474848
Rad9	0.984124	0.987468	0.70714	1.09765	1.13087	0.829397	0.674705	0.736445	0.700731	1.19642	1.00218	0.985136	0.932592	0.935534	1.07793	0.921587	1.16457	1.00849	1.14329	0.709507	0.937368	1.08145	1.13234	1.14122	0.738619	0.78934	1.08936	0.924993	1.00431	1.30072	0.912972	0.895014	0.709142	0.821563	0.884806	1.09094
CG15436	0.650552	0.701436	0.705804	0.939313	1.00532	1.03689	0.757494	0.858745	0.769928	1.6195	0.961316	0.877244	0.980471	0.948841	0.788359	1.03142	1.15479	0.972622	0.542972	0.748197	0.641493	0.86309	1.13839	1.76221	0.767185	0.909778	0.717945	0.896662	1.20749	1.27589	0.779366	0.525735	0.823088	0.984345	0.745178	1.15186
bw	-0.634649	-0.52908	-0.513059	-0.392816	-0.61265	-0.567516	-0.143996	0.147578	-0.187421	-0.269532	-0.390592	-0.379004	-0.658753	-0.487941	-0.865293	-0.721047	-0.631844	-0.682427	-0.532133	-0.419578	-0.642879	-0.721867	-0.65996	-0.66308	-0.693236	-0.783794	-0.707015	-0.677923	-0.75911	-0.748249	-0.782446	-0.617889	-0.598862	-0.640488	-0.431356	-0.630603
CG5367	-0.014001	0.101373	0.0982533	0.300882	0.376853	0.0787755	0.429959	0.356773	0.425423	0.0182124	0.146476	-0.16898	0.0549797	0.176822	-0.60255	0.115424	0.270927	-0.0633629	0.336392	0.30726	0.122751	0.437711	0.141387	0.19978	-0.415905	-0.296238	-0.187478	-0.00212047	-0.127036	-0.510025	-0.335064	-0.452577	-0.15312	-0.311673	-0.508154	-0.331655
hd	0.250346	0.455508	0.448606	0.636224	0.931294	0.681488	0.426427	0.332072	0.285974	0.636639	0.641178	0.567272	0.753528	0.794457	0.74796	0.648872	1.19712	0.763862	0.72319	0.604424	0.604437	0.820553	0.807193	0.904519	0.768642	0.779549	0.731937	0.857658	0.927394	0.907699	0.549321	0.566921	0.747388	0.681071	0.768332	0.773428
CG11398	0.694563	0.73115	0.91161	1.04165	0.995168	1.14166	0.787149	0.872982	0.858882	1.09459	0.857844	1.02899	1.10657	0.949939	1.02639	1.12351	0.987777	1.01167	0.903206	1.00388	0.847647	1.13667	0.972197	1.03858	0.864124	0.949338	1.03006	0.850623	1.23952	1.13307	0.799317	1.11879	0.865713	1.26168	0.972884	1.03884
al	0.00587764	0.166484	0.206687	0.422443	0.556442	0.547376	0.141941	0.232313	0.137482	0.375989	0.242848	0.572303	0.343163	0.999484	0.511286	0.896342	0.306368	0.525743	0.12865	-0.0120433	0.329771	0.233218	0.106085	0.349993	0.335284	0.439354	0.349538	0.560056	0.563946	0.631101	0.842072	0.787945	0.769508	0.489285	0.718658	0.347679
CG3259	0.319177	0.235831	0.288084	0.448006	0.405264	0.597205	0.126014	0.152616	0.385935	0.434571	0.435338	0.422055	0.271979	0.448938	0.349087	0.761855	0.647586	0.401918	0.233888	0.407048	0.250448	0.642592	0.312704	0.607495	0.34288	0.598316	0.340502	0.577097	0.520948	0.782731	0.729531	0.379982	0.703572	0.145273	0.591214	0.0917642
CG15919	0.0246251	-0.777601	-0.827919	-0.706095	-0.810488	-1	-1	-1	-1	-0.174153	-0.37796	-0.641939	0.0667089	-0.795877	-0.513057	-1	-0.325318	-1	-1	-1	-0.899683	-0.236362	-0.804181	-0.612294	-1	-0.405301	-0.411361	-1	-0.663036	-1	-1	-0.594542	-0.589951	-0.528081	0.123265	-0.282296
CG13602	0.326302	0.00200461	-0.0283994	0.38713	0.260267	0.268695	0.0381334	-0.239581	-0.158583	1.94665	0.204345	0.00510692	0.847652	0.873324	0.844181	0.45699	0.880757	0.745868	0.793392	0.922281	0.636777	1.0684	1.6078	2.19309	-0.0817391	0.34938	-0.141834	0.16005	0.872291	0.131117	-0.0944515	-0.113353	-0.104761	-0.0656741	0.122317	0.202072
CG9150	-0.924102	-1	-0.934694	-0.745747	-0.730666	-0.710328	-0.897529	-0.862079	-0.922316	-0.920734	-0.864439	-1	-0.956265	-0.710492	-0.86534	-1	-0.879411	-0.906265	-1	-1	-1	-0.826837	-0.889358	-0.579822	-0.625874	-0.947173	-0.794018	-0.946881	-0.497428	-0.85732	-0.80285	-0.519326	-0.321198	-0.869997	-0.695548	-0.618246
CG41284	-0.0171427	-0.198157	-0.090143	-0.302186	-0.496779	-0.29371	-0.323058	-0.430949	-0.192662	-0.265703	-0.513875	-0.418569	-0.525494	-0.512845	-0.765083	-0.760392	-0.838842	-0.956887	-1	-0.88377	-0.837863	-0.793763	-0.867686	-0.406155	-0.853311	-0.655564	-0.884672	-0.816563	-0.733599	-0.870453	-0.661228	-0.597701	-0.593141	-0.772944	-0.722205	-0.75814
CG42296	-0.930357	-0.960314	-0.863905	-0.987929	-1	-0.931709	-1	-1	-0.975845	-0.975344	-0.978472	-0.95536	-0.973147	-0.838194	-0.916322	-0.898064	-0.962117	-0.970742	-0.976113	-0.959694	-0.856696	-0.92701	-0.942662	-0.927425	-0.911523	-0.8894	-0.870814	-0.888802	-0.958266	-0.911245	-0.978667	-0.965595	-0.986833	-0.939029	-0.982861	-0.956212
CG13678	-0.766806	-0.800374	-0.8954	-0.818424	-0.337082	-0.555236	-0.324022	-0.535212	-0.655727	0.070808	-0.217647	0.356517	-0.737052	-0.375854	0.0786781	-0.525377	-0.901332	-0.652304	-0.225451	-0.797427	-0.622372	-0.365646	-0.572216	-0.650055	0.138745	0.258806	0.922676	0.226451	0.357098	-0.117126	0.456161	0.549044	0.271837	0.0509418	0.300146	0.569328
CG42272	0.470177	0.486383	0.653473	0.0044216	0.234668	-0.209182	0.0383476	0.127151	0.0152921	0.500815	0.51395	0.122202	1.23242	0.974659	1.33759	0.819938	0.978068	0.695239	0.903469	0.843248	1.15094	1.36403	1.39626	1.38243	1.11976	1.17853	1.07152	0.813621	0.552091	0.888464	0.972309	0.926229	0.89826	1.16973	1.54937	1.35652
CG14662	0.593393	0.693295	0.270951	1.17755	1.34774	0.855579	1.05955	1.37538	1.24169	1.20218	0.812724	0.775407	1.56584	1.0577	1.12583	1.12133	1.10297	1.26969	1.19004	1.46584	1.49568	1.06196	1.44081	2.06682	0.832767	0.619444	0.819912	1.34569	1.87523	1.45277	0.934934	0.859771	1.03778	0.914715	0.985819	0.856654
lectin-22C	-0.831017	-0.950315	-0.925133	-0.911403	-1	-1	-1	-1	-1	-0.909192	-1	-1	-0.949806	-0.82648	-0.921026	-0.935132	-0.862132	-0.892692	-0.911963	-1	-1	-0.742282	-0.914408	-0.909397	-0.951689	-1	-1	-0.939066	-0.94776	-0.837051	-1	-1	-0.950991	-1	-0.875561	-1
Ama	-0.562359	-0.559708	-0.458282	-0.399666	-0.387395	-0.709229	-0.609925	-0.589571	-0.759409	-0.200001	-0.28072	-0.269269	-0.481249	-0.395271	-0.225471	-0.521325	-0.404809	-0.411835	-0.452617	-0.457214	-0.433369	-0.416943	-0.236796	-0.223501	-0.363133	-0.408463	-0.497023	-0.372529	-0.390447	-0.3359	-0.390158	-0.262705	-0.381809	-0.155691	-0.510756	-0.161127
CR43700	-0.903584	-1	-1	-0.90178	-0.740621	-0.782672	-1	-0.939557	-1	-0.899337	-0.828722	-0.878541	-0.788954	-0.900929	-0.912416	-0.558415	-0.776803	-0.528538	-0.810985	-0.916767	-0.905957	-1	-0.77352	-0.410537	-0.749767	-0.86849	-0.741342	-0.689728	-0.635859	-1	-0.830197	-0.796145	-0.893152	-0.835663	-0.677479	-0.93917
CG32188	-1	-0.88992	-1	-0.636393	-0.81914	-0.680327	-1	-0.879597	-1	-0.62814	-0.670666	-0.762828	-1	-1	-1	-0.857172	-1	-0.879165	-1	-1	-0.904397	-1	-1	-0.802552	-0.699963	-1	-1	-0.865619	-1	-1	-0.827453	-1	-0.891387	-1	-1	-0.878841
CG13674	-1	-0.94287	-1	-0.85006	-0.815927	-0.883306	-1	-1	-1	-0.798627	-0.908711	0.0334061	-0.592354	-0.897449	-0.824018	-0.660759	-0.633737	-0.658523	-0.804553	-0.832513	-0.684633	-0.920885	-1	-0.581813	-0.605961	-0.468824	-0.387291	-0.623257	-0.532636	-0.648715	-0.783622	-0.926273	-0.786695	-0.299375	-0.727733	-0.709382
CG2016	-0.189431	-0.41268	-0.444154	-0.0416009	0.140422	-0.179684	0.0524683	-0.0971328	-0.0382977	0.424419	0.0874781	0.107071	0.312668	0.0407809	0.203757	0.16534	0.526277	0.187522	0.191589	0.180273	0.128025	0.264438	0.416144	-0.13432	0.163235	0.141881	0.0366868	0.279541	0.639246	0.368914	0.499249	0.106926	0.357683	-0.076035	0.0483816	-0.285788
Gr98a	-0.53048	-0.289572	-0.0400325	-0.393283	-0.714023	0.273539	-0.664187	-0.602205	-0.441504	0.469696	0.132667	0.663189	-0.663133	-0.692729	-0.81181	-0.869198	-0.728658	-0.549531	-0.823874	-0.738993	-0.830132	-0.734799	-0.590806	-0.541089	-1	-0.877623	-0.767516	-0.7636	-0.51904	-0.964834	-0.887499	-0.846035	-0.637984	-0.818205	-0.896525	-0.018374
CR43951	0.027571	-0.0378056	0.0125927	-0.106999	-0.19125	-0.312249	-0.0165037	-0.130803	-0.184606	-0.171628	-0.334318	-0.138379	0.268457	0.117636	0.282853	-0.0352184	-0.252861	0.0535225	-0.0353294	-0.0797456	-0.0620662	-0.0776691	-0.0555894	0.128696	-0.375084	-0.308778	-0.0533469	0.0696049	0.196241	-0.305205	-0.298979	-0.340783	-0.53005	-0.170542	0.028372	-0.36336
CG6800	-0.186147	-0.0391922	-0.318947	0.378689	0.126173	-0.129943	0.124572	-0.0959268	-0.363605	0.202827	0.252365	0.269256	0.602123	0.417025	0.541992	0.38006	0.0345307	0.00659206	-0.00953434	0.315325	0.522533	0.586086	-0.131736	0.109489	0.42826	0.297331	0.196602	-0.0164741	0.212393	1.16675	0.317299	0.632365	0.217038	0.355754	0.361644	0.190193
CG17672	-1	-0.973253	-1	-0.882888	-1	-0.865689	-0.875092	-0.886077	-1	-0.646604	-0.722823	-0.77512	-1	-0.859374	-0.957286	-0.801677	-0.888528	-0.970556	-0.952316	-0.844182	-0.931662	-0.96281	-0.646716	-0.183174	-0.758935	-0.785409	-0.895098	-0.842701	-0.813695	-0.826596	-0.743115	-0.866231	-0.824729	-1	-0.932211	-1
dsf	-0.980067	-1	-0.982895	-0.989806	-1	-1	-1	-0.951134	-0.939611	-0.918403	-0.963848	-0.949865	-0.868897	-0.959292	-0.981937	-0.941765	-0.967964	-0.96306	-1	-0.900058	-1	-1	-0.913774	-0.707269	-0.978164	-0.959012	-1	-0.918714	-0.930243	-1	-0.964174	-0.985382	-0.98888	-0.96538	-1	-0.987547
sas-6	0.480889	0.335923	0.373715	0.754304	0.896257	0.917265	0.46103	0.602302	0.56945	1.38475	0.6636	0.693756	0.883929	0.75624	0.773321	0.906132	0.704929	0.689759	0.475598	0.344355	0.380084	0.495536	0.95733	1.33423	0.792115	0.842336	0.767979	0.883972	1.25947	1.15287	0.6478	0.515729	0.68241	0.819637	0.457892	0.964179
fd96Ca	-0.347683	-0.418895	-0.538481	-0.317275	-0.539549	-0.280567	-0.121083	-0.274589	0.147992	-0.409471	-0.736343	-0.385592	-0.233088	-0.177151	-0.254105	0.0749845	-0.0568951	-0.34571	-0.382306	-0.705183	-0.0903507	-0.127695	-0.548225	-0.264319	-0.298087	-0.288392	-0.489232	-0.20688	-0.321699	0.0705264	-0.0784929	0.173388	-0.14635	-0.147149	0.0144589	-0.395324
CG41242	-0.139982	-0.454386	-0.767732	-0.255792	-0.744723	-0.621961	-0.0204289	-0.410648	-0.298611	-0.196192	-0.544095	-0.460793	-0.76837	-0.725505	-0.872679	-0.797336	-1	-0.674349	-1	-0.767224	-0.799699	-1	-0.677418	-0.385144	-0.58312	-0.231543	-0.918806	-0.901391	-0.759516	-0.522696	-0.81338	-0.708715	-0.577809	-1	-0.801235	-0.827553
CG40551	-0.895336	-1	-1	-0.893384	-1	-0.937534	-0.859172	-0.934317	-1	-0.789175	-0.904254	-0.93262	-1	-1	-1	-0.921809	-1	-0.934077	-1	-1	-1	-1	-0.0549482	0.659254	-0.941698	-1	-1	-1	-0.936975	-1	-0.95177	-0.922651	-1	-1	-1	-0.933897
CG13247	0.213995	-0.000391916	0.134915	0.537389	0.780647	0.460406	0.208118	0.1915	-0.112762	0.297975	0.227198	0.0553629	-0.245055	-0.140479	0.111726	0.0430685	0.385564	0.0221665	0.0491085	0.219399	0.133799	-0.0814201	-0.262125	-0.115809	-0.0513863	-0.0852738	0.12333	0.405705	0.468784	0.314785	0.230149	0.2841	0.550563	0.149124	-0.0518353	0.00744275
Or2a	-0.842056	-0.414834	-0.738935	-0.56298	-0.402697	-0.602184	-0.493665	-0.484252	-0.603864	-0.430617	-0.202113	-0.401049	-0.51917	-0.477638	-0.530981	-0.60604	-0.301859	-0.238763	-0.52434	-0.29545	-0.444371	-0.489146	-0.617601	-0.33703	-0.55711	-0.334788	-0.453838	-0.627551	-0.479099	-0.666849	-0.46094	-0.490619	-0.380648	-0.694754	-0.359249	-0.365222
snoRNA:U49:66Db	0.118792	-0.588175	-1	-0.0772349	1.11736	-0.572919	0.135859	-0.213136	-1	0.786666	0.649361	0.0818506	0.00102671	1.00453	0.642502	-0.480345	-0.4415	0.296353	-1	0.00488797	-0.348381	-0.45302	1.48811	-0.0613945	0.959657	0.937862	-0.000969061	-1	0.779739	0.428198	-0.156788	0.193108	-0.276142	1.02432	-0.112972	0.0670186
CG15161	0.0307533	0.075373	-0.160846	0.47641	0.710693	0.166637	-0.0279848	-0.0652008	0.25248	0.34469	0.279086	0.0237537	0.538763	0.609263	0.430148	0.931977	1.04242	0.691715	0.0181199	0.0201491	0.292843	0.142198	0.0610832	0.0841502	0.187707	0.299586	-0.0172394	0.596288	0.679433	0.971785	0.816686	0.49518	0.549899	0.209216	0.354345	0.316773
CG43338	-0.620827	-0.902658	-0.815499	-0.817076	-0.929074	-0.85728	-0.867246	-0.893486	-0.899106	-0.689252	-0.784321	-0.747818	-0.784375	-0.781314	-0.805768	-0.908552	-0.771982	-0.766362	-0.65676	-0.815089	-0.813677	-0.829771	-0.626257	-0.586386	-0.866553	-0.80276	-0.835766	-0.881054	-0.750391	-0.815892	-0.699375	-0.775639	-0.864681	-0.717772	-0.793583	-0.686878
CG15497	1.21572	1.23921	1.2544	1.5765	1.73803	1.06298	0.727878	0.754148	0.613397	1.20609	0.992864	1.36548	0.344752	0.677028	0.207278	0.58509	0.244466	0.266555	-0.289423	-0.143963	-0.230765	-0.240913	-0.27826	-0.272642	0.533304	0.849424	0.762432	1.37549	0.980565	0.798847	0.697412	0.551952	0.581219	0.373403	0.630286	0.0407783
CG16734	1.25698	1.24649	1.06343	1.74579	1.95328	1.66427	1.11961	1.16961	1.25178	1.83422	1.30167	1.55362	1.15776	1.08189	1.29364	1.43103	1.15358	1.5595	1.13706	1.14736	1.21168	1.2147	1.59432	1.69019	1.32975	1.21991	1.28516	1.47566	1.66584	1.60046	1.13213	1.16699	1.38513	1.45179	1.25233	1.3979
CG18765	-0.646849	-0.203118	0.0613603	0.283193	0.0116496	-0.0851223	0.075096	0.170511	-0.110798	0.900816	0.727897	0.491953	0.417192	0.543618	0.3866	0.582169	0.247819	0.739356	0.139952	0.434187	0.634334	0.843169	0.797031	1.26379	0.497787	0.733477	0.246928	0.665985	0.813909	0.576515	0.654494	0.292842	0.766283	0.886534	0.974413	0.893636
CR31912	-0.959116	-0.976802	-0.964882	-0.979018	-1	-1	-1	-1	-1	0.0156808	-0.96267	-1	-0.930799	-0.957968	-1	-0.939882	-0.934579	-1	-1	-1	-1	-1	0.329294	1.11879	-0.933378	-0.971649	-0.953626	-1	-0.793952	-1	-0.981385	-0.940534	-1	-1	-0.912522	-0.924493
CG5897	1.77208	2.02523	1.95713	1.88929	1.68417	2.02417	1.87987	2.18787	2.15415	1.68244	1.81058	1.86171	2.02354	1.7429	2.00729	1.97965	1.89992	1.89554	2.23422	2.10717	2.05882	2.09288	2.1529	1.91816	2.32051	2.4546	2.28568	2.58996	2.39093	2.54983	2.53659	2.64762	2.43868	2.44915	2.23766	2.62316
CG42717	-0.821217	-0.89647	-0.57853	-0.581859	-0.539549	-0.235945	-1	-0.505987	-1	-1	-1	-0.88386	-0.79793	-0.653611	-0.690887	-0.742627	-0.384297	-0.590844	-0.382306	-0.352157	-0.825499	-0.4989	-0.74338	-0.813976	-1	-1	-0.798451	-0.455998	0.0127992	-0.673587	-0.437477	-1	-0.71299	-0.453429	-0.26061	-0.681981
Ir20a	-0.918433	-0.953436	-0.798877	-0.745767	-0.813325	-0.670531	-0.889949	-0.899671	-0.799706	-0.616947	-0.722397	-0.848293	-0.930001	-0.957479	-0.821523	-0.824749	-0.933823	-0.517069	-0.877845	-0.862543	-0.773412	-0.843683	-0.719541	-0.815369	-0.868226	-0.861968	-0.885458	-0.887934	-0.707951	-0.741908	-0.633655	-0.826575	-0.909557	-0.644716	-0.855409	-0.782025
CG16815	-1	-0.730066	-0.790376	-0.841375	-0.880117	-0.888354	-0.913013	-0.959833	-1	-0.932793	-1	-1	-0.962988	-1	-1	-0.774993	-1	-0.920465	-1	-1	-1	-0.852469	-1	-1	-0.830102	-0.675868	-0.891984	-0.827943	-0.961472	-0.878629	-1	-1	-0.928613	-1	-1	-0.959574
CG13036	-0.377744	-0.844193	-0.451757	0.0461963	-0.126217	-0.518264	-0.366638	-0.677628	-0.499978	0.181876	-0.422955	0.0200729	0.275722	0.254965	0.437911	1.45695	0.895248	0.79549	-0.576332	-0.394674	0.210339	-0.0726046	0.298023	0.944098	-0.00177634	-0.0163909	-0.243418	0.856419	0.565717	0.354307	0.915148	0.773075	0.631979	-0.502396	0.920462	-0.582047
CG13930	-0.903975	-1	-1	-0.840465	-0.968897	-0.905823	-0.912501	-0.920286	-0.72325	-0.806006	-0.940863	-0.87903	-0.926469	-0.722187	-0.85742	-0.752939	-0.824201	-0.844196	-0.966865	-0.917107	-0.876423	-0.948825	-0.983811	-0.949118	-0.878301	-0.748944	-0.926667	-0.806719	-0.86867	-0.877924	-0.927105	-0.818144	-0.910784	-0.785635	-0.819792	-0.900402
Su(Ste):CR42442	-0.892319	-1	-0.907206	-0.838445	-0.712118	-0.758413	-1	-0.932397	-1	-1	-0.901485	-1	-0.877904	-1	-1	-1	-0.912489	-1	-1	-1	-1	-1	-0.94603	-1	-0.882376	-1	-1	-1	-1	-1	-1	-1	-1	-1	-1	-1
CG13377	3.63716	3.488	3.52517	3.77576	3.71112	3.75585	3.53779	3.74692	3.90305	3.3592	3.50798	3.50111	3.11705	3.33205	3.31931	3.32481	3.13762	3.25397	2.79552	2.95574	3.0555	2.79541	2.6824	2.55612	3.06279	2.96995	2.8737	3.11681	2.99609	3.11392	3.173	3.07613	3.05622	2.57838	2.85047	2.96132
Muc14A	-0.963988	-0.979581	-0.981365	-0.973482	-0.980731	-0.96609	-0.96757	-0.98027	-0.98366	-0.938786	-0.964525	-0.949903	-0.960647	-0.976195	-0.954493	-0.969026	-0.973179	-0.96331	-0.979467	-0.961659	-0.960736	-0.964847	-0.922483	-0.910046	-0.942022	-0.96321	-0.967222	-0.952188	-0.958196	-0.977716	-0.969354	-0.956876	-0.964742	-0.962303	-0.960368	-0.942974
CG12836	-0.148256	0.058046	-0.336705	0.2935	0.466756	-0.094166	-0.117539	-0.454204	-0.236725	0.388484	0.0115371	0.0440203	-0.0348272	0.224599	-0.119652	0.592583	0.631283	0.106931	-0.606665	-0.435672	-0.116735	0.0164621	-0.26031	-0.0709732	0.0604659	0.24343	-0.20205	-0.00832125	0.192634	0.415599	0.825754	0.319151	0.407266	-0.327075	0.572582	-0.377094
CR43424	-0.632164	-0.388618	-0.616739	0.221669	-0.914159	-0.0374017	0.114566	0.35509	0.0865403	-0.409182	-0.332302	-0.48339	-0.36624	-0.385521	-0.23334	-0.282023	-0.167167	-0.0273513	-0.39322	-0.337989	-0.175864	-0.246702	0.666511	1.23866	-0.243201	-0.150347	-0.608549	-0.0599421	-0.227229	-0.17117	-0.551652	-0.39627	-0.378602	-0.381632	0.00422604	-0.181103
CG11381	-0.872902	-0.975238	-0.962524	-0.891334	-0.840828	-0.89941	-0.970135	-1	-1	-1	-1	-0.972129	-0.879037	-1	-1	-0.935884	-0.896581	-0.945985	-1	-0.962437	-0.91616	-0.899055	-0.874881	-0.977083	-0.952252	-0.911062	-1	-0.969572	-1	-0.958002	-0.980128	-0.967941	-1	-0.961852	-0.968246	-0.868224
CR42875	0.720026	0.801432	0.822237	1.28615	1.22368	1.15194	0.669239	0.646427	0.348216	1.85802	0.628714	0.836158	0.631658	1.10141	0.768027	1.10674	0.511724	0.986941	0.503047	0.232029	0.867103	0.605596	1.10319	1.58674	0.640588	0.719355	0.51234	1.03645	1.42535	1.00761	0.866374	0.536287	0.639453	0.797834	-0.0269711	0.876266
snoRNA:Psi18S-301	-1	-0.735652	-0.311703	0.184101	0.429585	0.42095	-0.428625	0.216919	0.49878	-0.196192	0.848598	0.370782	1.15516	1.70071	0.705077	0.637612	0.723351	0.471245	0.662993	0.340316	0.779325	0.567723	1.11521	1.54493	1.0451	1.1528	-0.143608	1.51203	0.639792	0.612935	-0.0242546	0.499338	0.756908	0.668444	0.196926	0.874336
Mlh1	1.02963	0.728437	0.790755	0.93674	0.798298	1.0244	0.712997	0.518288	0.627051	0.907834	0.994405	0.961002	0.851218	1.11822	0.740247	0.981481	1.00164	0.931534	0.649611	0.687616	0.628384	0.918695	0.94782	1.05888	0.399295	0.607284	0.502186	0.643467	0.80949	0.763866	0.544951	0.433607	0.454665	0.496499	0.686055	0.692143
CG33253	-0.299186	-0.125283	-0.291917	-0.52366	-0.509351	-0.548146	-0.0661254	0.100251	-0.260452	-0.149947	-0.473208	-0.113244	-0.157034	-0.283456	0.144036	-0.152332	0.00675058	-0.184769	-0.343924	0.243654	-0.217305	-0.278592	-0.283472	-0.187529	-0.194392	-0.443126	-0.225353	-0.0829579	-0.144164	-0.295874	-0.124326	-0.228107	-0.29301	-0.0981458	-0.100396	-0.368541
CG7135	0.332974	0.10751	-0.0910491	0.450896	0.307157	0.114584	0.618379	0.305713	0.275384	0.465275	0.593549	0.0351276	0.627082	0.635047	0.586817	0.784305	1.10592	0.629113	0.942203	0.992704	0.938257	0.693852	0.954319	0.688031	0.323303	0.337883	0.476557	0.816576	0.904569	0.758488	0.785398	0.644958	1.08154	0.891308	0.763061	0.853412
CCKLR-17D3	0.399234	0.401518	0.346257	0.107079	0.0534599	0.168893	0.18975	0.279056	0.138129	-0.0200361	0.252647	0.216123	0.44785	0.468556	0.556172	0.452002	0.284332	0.282229	0.754901	0.461864	0.226405	0.399869	0.598682	0.302042	0.199403	0.507213	0.545246	0.417099	0.335583	0.500124	0.49921	0.666956	0.62296	0.467102	0.327451	0.343077
CG17352	1.1412	1.28225	1.66933	0.740316	0.495305	0.974516	0.617999	0.900087	0.687908	0.955505	1.49545	1.17253	0.848089	0.650279	0.706076	0.560265	0.665957	0.728978	0.479194	0.562763	0.590831	0.872244	0.968749	0.984649	0.831256	0.968333	0.713027	0.706943	0.617699	0.785528	0.614357	0.648744	0.908491	0.710308	0.981915	0.82204
CG32668	0.25454	0.245139	-0.141018	0.632151	0.559612	0.484147	0.0521926	-0.124649	-0.0635117	0.00891361	-0.0348787	0.452683	0.432106	0.724243	0.339222	0.977068	1.03914	0.547397	-0.130734	0.322424	0.388992	0.274624	0.0780988	0.212266	0.37985	0.455961	0.463851	0.91388	0.457522	0.62413	0.805738	0.858577	0.78639	0.316947	0.715729	-0.0568494
Fbp1	-0.920288	-0.878191	-0.882009	-0.979264	-0.924175	-0.91803	-0.756504	-0.925836	-0.918415	-0.937121	-0.909477	-0.911628	-0.954041	-1	-0.96336	-0.969984	-0.98356	-0.877994	-0.959087	-0.965211	-0.960607	-0.921552	-0.979984	-0.927068	-0.944918	-0.865048	-0.988404	-0.890457	-0.987892	-0.886309	-0.963439	-0.941223	-0.879809	-0.982226	-0.985223	-0.97469
CG33003	-0.965495	-1	-0.884965	-0.930507	-0.935135	-0.808001	-0.842375	-0.91602	-0.799946	-0.894419	-0.907493	-0.95629	-0.379036	-0.516307	-0.589875	-0.266302	-0.565344	-0.571393	-0.246086	-0.376336	-0.396901	-0.151966	-0.403585	-0.632206	-0.361058	-0.602156	-0.649406	-0.272773	-0.468622	-0.644427	-0.532445	-0.272678	-0.483216	-0.602843	-0.492962	-0.670701
snoRNA:U49:66Da	0.157195	0.255527	0.0388794	0.172515	0.46099	0.0601919	-0.12167	0.0992141	-0.295143	0.837005	0.927799	-0.52402	0.633659	0.535021	0.920375	1.06593	0.577971	0.102092	0.520448	-0.387824	0.764645	-1	1.11375	0.834586	1.33502	1.5038	0.261904	-0.486918	1.09943	-1	0.0783745	1.05374	-0.575523	0.881465	1.32574	-0.179049
CG17994	-0.0577496	-0.30079	-0.603847	-0.0444206	-0.0705339	0.0340224	-0.207104	-0.438897	-0.214595	-0.149635	-0.307329	-0.199495	-0.234362	0.00788737	-0.0396434	0.0800266	0.046751	0.00835501	-0.330022	-0.413587	-0.244226	-0.318021	-0.359346	-0.190155	-0.0798726	0.349502	-0.163704	0.0911174	0.209469	0.106172	0.0679067	0.102135	-0.234125	-0.259906	0.182229	-0.614574
CG13500	-0.686163	-0.650541	-0.607701	-0.729259	-0.793487	-0.748379	-0.557714	-0.592978	-0.499398	-0.774239	-0.330104	-0.611723	-0.872615	-1	-0.670309	-0.915995	-0.781634	-0.861622	-0.780828	-0.856727	-0.813308	-0.954734	-0.786655	-0.827832	-0.659295	-0.883778	-0.622392	-0.88315	-0.89955	-0.790999	-0.873695	-0.727946	-0.760977	-0.901442	-0.564555	-0.89471
CG42550	2.30336	2.54183	2.42334	2.52558	3.08525	2.2284	2.06708	2.15692	2.06971	2.4636	2.40546	2.33799	2.80038	2.68746	2.58785	2.58445	1.98362	2.35487	2.69044	2.30229	2.65678	2.57034	2.74216	2.70633	2.84804	2.68079	3.00591	2.97781	3.22447	2.97193	2.85038	2.42511	2.49438	2.81318	2.57517	2.82557
CG8492	-0.171168	-0.102961	-0.195859	-0.440691	-0.804346	-0.423646	-0.717414	-0.567591	-0.647187	-0.726113	-0.540153	-0.510902	-0.175685	-0.274733	-0.487989	-0.578294	-0.760813	-0.460857	-0.650694	-0.531112	-0.764071	-0.575118	-0.451262	-0.429898	-0.152551	-0.215302	-0.279049	-0.456692	-0.668576	-0.450082	-0.606566	-0.648946	-0.627786	-0.535507	-0.420324	-0.341027
CR43958	0.476862	0.316134	-0.157831	0.641977	0.429828	0.0618707	0.176439	0.305713	0.275384	0.251751	0.017219	-0.154037	0.0645275	0.0614002	0.319281	0.087111	0.00915835	0.210013	-0.657936	-0.404662	-0.34066	-0.211116	0.16002	0.207383	-0.0163556	-0.0648265	0.0881433	0.0708717	0.778365	0.223252	-0.147391	-0.024007	-0.0880263	-0.241405	-0.0308626	0.020735
CG15308	-1	-0.92115	-0.576066	-0.508231	-0.186871	-0.231948	-0.732617	-0.482303	-0.222506	-0.299612	-0.459765	-0.911455	-0.773143	-0.403293	-0.555505	-0.547238	-0.597782	-0.610996	-0.734851	-0.772019	-0.631239	-0.443834	-0.865129	-0.608514	-0.781171	-0.649375	-0.845277	-0.813081	-0.277285	-0.435124	-0.419788	-0.476442	-0.416397	-0.394333	-0.633914	-0.831177
CG7329	-0.433007	-0.828726	-0.747079	0.0732644	0.0998545	0.106149	-0.655788	-0.786296	-0.661839	0.806928	-0.606476	-0.350955	-0.332936	-0.41971	-0.315398	0.620319	0.515629	0.0259823	-0.902861	-0.877463	-0.404416	-0.427479	0.619195	1.37272	-0.327629	-0.108772	-0.343326	0.928093	0.936022	1.04507	1.08651	0.928515	0.656032	-0.493892	0.623661	-0.645483
CG18519	-0.600869	-0.564608	-0.476787	-0.637226	-0.514943	-0.501911	-0.655988	-0.657069	-0.55048	-0.674304	-0.54369	-0.560181	-0.568449	-0.391692	-0.396383	-0.479893	-0.481891	-0.551738	-0.713735	-0.432449	-0.485357	-0.523594	-0.53271	-0.455206	-0.509167	-0.632101	-0.608784	-0.516298	-0.643933	-0.435948	-0.436286	-0.438386	-0.539768	-0.537076	-0.626228	-0.601924
CR41544	-1	-0.858854	-1	-0.811804	-0.48113	-0.784916	-0.913091	-0.706447	-0.87127	-0.262755	-0.778176	-1	-0.791137	-0.642533	-0.680874	-0.580726	-0.897628	-0.773645	-0.755633	-1	-0.937318	-1	-0.708257	-0.585627	-0.515024	-0.829	-0.927164	-0.674506	-0.594568	-0.566242	-0.831978	-0.584757	-0.860715	-0.691265	-0.73915	-0.773061
CG14050	0.232752	0.0854634	0.903532	0.640966	0.874353	0.766752	0.160063	0.293775	0.27451	0.771795	0.945353	0.632106	0.486375	0.480567	0.31039	0.506346	0.0828292	0.661571	0.22115	0.621098	0.563848	0.767506	0.42101	0.680466	0.167544	0.18628	0.209338	0.407556	0.616545	0.526249	0.525155	0.385416	0.264791	0.350841	0.144419	0.411665
CR43874	-0.541889	-0.682819	-0.924948	-0.637411	-0.917063	-0.54971	-0.533258	-0.74564	-0.467364	-0.823343	-0.920291	-0.787961	-0.600073	-0.285732	-0.354673	-0.452988	-0.61972	-0.654104	-0.410567	-0.785159	-0.914975	-0.683737	-0.0827372	0.47868	-0.540003	-0.824923	-0.854406	-0.717559	-0.848271	-1	-0.774899	-1	-0.812781	-0.92362	-0.333673	-0.791789
CG9692	-0.90151	-0.916256	-0.915164	-0.948962	-1	-1	-1	-0.96879	-1	2.40649	-1	-0.936643	-0.784591	-0.948513	-0.95457	-0.962762	-0.959449	-0.968674	-0.900301	-1	-1	-0.884432	1.71377	2.51229	-0.918545	-1	-0.375212	-0.712229	1.41675	-1	-0.954667	-0.927254	-0.765114	-0.913667	-0.963519	0.430247
Ir92a	-0.886823	-0.719321	-0.753218	-0.830357	-0.927302	-0.76615	-0.754687	-0.817664	-0.677219	-0.959538	-0.831313	-0.813142	-0.404013	-0.552465	-0.329864	-0.354974	-0.43155	-0.673986	-0.341434	-0.446643	-0.587072	-0.21102	-0.320028	-0.623757	-0.708826	-0.729051	-0.628508	-0.773506	-0.84554	-0.694816	-0.297959	-0.271347	-0.759334	-0.749102	-0.788665	-0.673173
CG4854	0.816612	0.900021	0.809708	1.12672	1.41578	1.05494	1.17613	1.16832	0.99768	1.67824	1.08738	0.973024	1.22442	1.0316	1.17543	1.14019	0.930184	1.2272	1.16582	0.921015	1.05686	1.60991	1.46207	1.06878	0.97843	1.07276	0.863641	1.34675	1.39977	1.46147	1.28432	1.25726	1.11032	1.20154	1.21047	1.50221
CG7179	-0.685719	-0.554422	-0.169992	-0.235147	-0.257905	-0.254436	-0.554451	-0.395446	-0.483416	-0.49773	-0.281302	-0.382445	-0.765486	-0.786748	-0.888768	-0.664243	-0.637465	-0.76276	-0.906138	-0.681342	-0.667989	-0.665212	-0.768402	-0.727695	-0.803992	-0.794893	-0.912041	-0.813159	-0.838847	-0.600158	-0.875709	-0.763466	-0.785915	-0.892645	-0.825823	-0.796286
CG9521	-0.546665	-0.543934	-0.312583	-0.656513	-0.414049	-0.811502	-0.806228	-0.722334	-0.59498	-0.712417	-0.634206	-0.52968	-0.320965	-0.653776	-0.390813	-0.696384	-0.445974	-0.591034	-0.689241	-0.705326	-0.503061	-0.478121	-0.637814	-0.649389	-0.823572	-0.714896	-0.916016	-0.75742	-0.829814	-0.764114	-0.884429	-0.768896	-0.74824	-0.784474	-0.893692	-0.720682
Obp47a	-0.420753	-0.847558	-1	-0.861544	-0.642052	-0.768161	-1	-0.914342	-1	-1	-0.760939	-0.912145	-1	-1	-1	-1	-0.600604	-1	-0.862405	-1	-1	-1	-1	-1	-0.375594	-0.815464	-0.775406	-0.502609	-0.695994	-0.534988	-0.876612	-0.554642	-0.92282	-0.880646	-0.220674	-1
CG42269	0.832911	1.12827	0.913912	0.251206	0.496081	0.06379	0.434809	0.258766	0.134147	0.136265	0.487957	0.718191	1.25552	1.61884	1.59394	0.892983	0.896676	0.812066	0.545952	0.839122	0.871775	1.54514	1.64311	1.43901	1.48879	1.56198	1.52879	0.944751	0.63314	0.920875	1.24966	1.13274	1.13579	1.17881	1.09671	0.882531
neo	-0.593508	-0.67007	-0.811597	-0.809705	-0.851771	-0.906456	-0.819782	-0.73519	-0.658971	-0.577443	-0.727668	-0.704293	-0.361837	-0.547716	-0.191355	0.140437	0.159868	-0.194081	-0.643681	-0.385186	-0.36302	-0.297338	-0.564707	-0.237869	-0.407007	-0.237347	-0.424609	-0.205544	-0.431613	-0.243858	-0.211006	-0.315191	-0.162185	-0.623402	-0.352694	-0.477932
CG13699	-1	-0.937405	-0.967943	-0.961961	-0.96452	-0.988924	-1	-0.976779	-0.961784	-0.94188	-0.884092	-0.906956	-1	-0.961625	-0.949529	-0.97228	-0.969805	-0.953757	-0.943674	-0.936436	-1	-1	-0.98152	-0.91387	-0.969243	-0.974125	-0.947259	-1	-1	-1	-0.941411	-0.972584	-0.928214	-0.983591	-0.986359	-0.95363
CG7290	-0.958029	-0.976181	-0.963945	-0.978456	-1	-1	-1	-1	-1	-1	-1	-0.870667	-1	-1	-1	-1	-1	-1	-1	-1	-1	-1	-0.979203	-1	-0.976845	-1	-1	-1	-1	-1	-1	-1	-1	-1	-1	-1
CG14036	-0.846389	-1	-0.86734	-1	-1	-0.739117	-0.532449	-0.726599	-0.453773	2.37822	-0.859278	-0.807451	-0.910477	-1	-0.615697	-1	-1	-0.725667	-0.844538	-0.63305	-0.923103	-1	1.16398	2.15559	-0.832446	-0.892216	-0.747193	-0.696629	1.28308	-0.851903	-0.733313	-0.885981	-0.41518	-0.522577	-0.684623	0.220405
snoRNA:Me28S-C3420b	-1	-0.616	-1	-1	-1	-0.601639	-0.547447	-0.583416	0.0756437	-0.353447	-0.421649	-0.245343	-1	-1	0.303999	-0.514308	-0.0948449	-1	-1	-1	-0.662567	-0.1116	-0.15364	-0.641543	0.474189	0.0841352	-0.0575138	-1	-1	-0.395606	-0.0164831	-1	-0.620673	0.530067	-1	-1
Cpr50Ca	0.689609	0.311435	0.117309	0.338903	0.442917	0.653002	0.500604	0.0961429	0.577903	-0.204488	-0.481839	-0.209274	-0.609423	-0.470876	-0.538361	-0.67222	-0.726696	-0.607915	-0.681295	-0.625788	-0.659848	-0.87514	-0.739658	-0.846397	-0.849206	-0.876692	-0.88684	-0.678934	-0.632924	-0.711852	-0.608885	-0.712259	-0.910657	-0.862146	-0.8846	-0.852864
CG3045	0.878254	0.994963	0.93068	1.19958	0.931943	1.10435	1.04183	1.11483	1.00225	1.01402	1.25672	1.08291	1.17283	1.07933	1.09883	1.26046	1.04789	1.05212	1.1502	1.05839	0.974813	1.28469	1.39523	1.51048	1.27752	1.29697	1.24133	1.52994	1.48829	1.43371	1.25415	0.989181	1.27052	1.37704	1.43343	1.56394
ninaA	-0.774117	-0.63627	-0.866612	-0.511344	-0.191517	-0.354	-0.746036	-0.72517	-0.769073	-0.693976	-0.858509	-0.378474	-0.528747	-0.768172	-0.793994	-0.776859	-0.458077	-0.565906	-0.574226	-1	-0.618345	-0.937241	-0.847935	-0.627401	-0.645339	-0.89162	-0.70754	-0.563782	-0.512157	-0.716131	-0.826706	-0.728841	-0.955368	-0.740272	-0.682997	-0.602923
CG13055	-0.130369	-0.281791	-0.201495	-0.370353	-0.479261	-0.418113	-0.217991	-0.236755	-0.143105	-0.400424	-0.111967	-0.466597	-0.356975	-0.154843	-0.193388	-0.407314	-0.546601	-0.401635	0.0980886	-0.0569949	0.0570001	-0.217401	-0.21158	-0.37556	-0.1285	-0.304235	-0.0364656	-0.379237	-0.454455	-0.507946	-0.130537	0.012746	0.133643	-0.0926265	0.0148497	0.0142834
Est-P	1.57954	2.1581	1.79994	1.17078	1.68411	1.58643	1.51144	2.16728	0.82737	1.16651	1.61036	1.48092	0.560665	0.151634	0.298562	0.00344705	-0.152995	-0.145309	-0.320618	0.0659718	-0.0358653	0.017061	-0.203177	-0.00844797	0.452085	0.645431	0.391275	0.199131	0.758426	0.222461	0.594008	0.684844	0.621107	0.460812	0.433842	0.778997
CG10694	-1	-0.959222	-1	-1	-1	-0.957502	-0.857371	-0.750466	-0.727071	1.58412	-1	-1	-0.50888	-1	-0.935067	-0.797726	-0.546663	-0.869379	-0.400852	-0.938317	-0.800085	-0.836477	1.21745	2.17539	-0.709697	-0.72428	-0.633896	-0.641179	0.609518	-0.865342	-0.873196	-0.94729	-0.959779	-0.877336	-1	0.00980983
dgt6	0.601316	0.685705	0.865978	1.04335	0.604511	0.851036	0.75154	0.877437	1.03208	1.18173	0.682305	0.970564	1.11137	1.12484	1.17591	1.18672	1.29033	0.892444	1.16092	1.00884	1.12917	1.15494	1.14695	1.28525	1.04237	1.12478	1.04161	1.33082	1.12562	1.25785	1.14679	0.992047	1.21268	1.01163	1.02335	1.15268
fos28F	0.296813	-0.0642705	0.255605	-0.19882	-0.793645	-0.107225	0.072418	-0.351213	-0.218933	-1	0.418462	-0.468212	-0.336278	-0.363132	0.243776	-0.359257	0.0922626	-0.175319	0.307644	0.141103	0.290486	-0.216026	0.0622269	0.0294955	0.309552	0.056856	0.375372	0.136759	-0.910443	-0.498832	0.227009	0.322422	0.176525	0.455525	0.220281	0.44079
Ir84a	-0.933365	-0.962044	-0.94269	-0.982724	-1	-0.980085	-1	-0.979044	-1	-0.964779	-1	-1	-1	-0.803577	-1	-1	-1	-0.978966	-0.899954	-1	-0.842732	-1	-0.983324	-0.913705	-1	-0.781911	-1	-0.953408	-1	-0.904779	-0.924955	-0.880306	-0.890483	-0.97054	-0.927685	-0.958119
CG3032	0.391869	0.616228	0.4583	0.2894	0.4191	0.264378	0.539652	0.559125	0.576265	0.84863	0.196653	0.239661	0.579558	0.510035	0.884141	0.734491	0.932252	0.541562	0.680219	0.829336	0.626702	0.56465	0.712681	0.559074	0.286548	0.416944	0.271324	0.434873	0.782608	0.629883	0.576701	0.608299	0.386446	0.580505	0.668787	0.695734
nAcRalpha-7E	0.173174	-0.100775	-0.219872	-0.255649	-0.500245	-0.432647	-0.0900919	-0.251673	-0.207588	-0.898476	0.523958	-0.515857	-0.612734	-0.876147	-0.322053	-0.48825	-0.267836	-0.406327	-0.156507	-0.58908	-0.430346	-0.294217	-0.451068	-0.514521	0.00227294	-0.108948	0.116907	-0.243072	-0.779028	-0.676228	-0.227005	-0.159154	-0.252743	0.046175	-0.105248	-0.324277
CG15322	-0.887317	-0.814213	-0.950619	-0.679887	-0.945381	-0.762251	-0.813016	-0.676397	-0.777936	-0.939993	-0.847979	-0.875228	-0.84202	-0.884232	-0.897587	-0.779229	-0.953471	-0.828541	-0.913621	-0.902651	-0.863856	-0.977124	-0.836662	-0.71022	-0.937154	-0.775626	-0.887923	-0.774458	-0.835823	-0.815027	-0.873346	-0.916665	-0.890222	-0.925248	-0.765287	-0.860872
CR41501	0.116737	0.00489174	0.116844	0.206008	-0.102078	0.0883114	-0.119936	-0.18148	0.376143	-0.0873901	-0.276456	-0.181836	-0.0832896	-0.151013	0.0414074	0.00654395	-0.468635	0.340796	-0.0340844	0.081136	0.238963	0.154554	0.00422827	-0.283347	0.155457	0.229413	0.148843	0.206146	-0.0268062	0.128885	0.250095	0.3338	0.0711959	0.167758	0.227294	0.272518
snoRNA:Psi28S-3316a	0.082971	0.42324	0.37736	-0.184403	-1	0.770438	-0.407337	-0.05654	-0.181464	-0.525124	0.0142886	-0.225448	-0.288708	-0.531761	-0.580351	-0.365992	-0.320427	-0.238763	0.707178	-0.285703	0.0634729	-0.628855	0.191301	0.239473	0.787375	-0.669559	-0.29026	0.198009	-1	-1	-0.775425	-0.371678	-0.302249	-1	-0.376599	-0.449506
CG34107	-0.0243931	-0.601725	-0.499955	-0.0107351	-0.0039052	-0.18622	-0.713701	-1	-0.885652	4.19794	-0.802269	-0.558265	-0.501212	-0.196357	-0.630683	0.00964669	-0.594053	-0.798197	-1	-0.812976	-0.649821	-0.674008	3.94812	4.60024	-0.305804	-0.710246	0.0692618	0.390505	2.90271	-0.698422	-0.33806	-0.228164	-0.511369	-0.492296	-0.56671	0.83164
pen	3.43546	3.37282	3.4532	3.57924	3.7588	3.71775	3.58504	3.62917	3.53622	3.91958	3.78196	3.82269	3.43848	3.53672	3.39554	3.53965	3.89007	3.4553	3.32205	3.44702	3.45848	3.43079	3.5134	3.60926	3.461	3.44378	3.46049	3.55185	3.84091	3.74791	3.52402	3.57869	3.57873	3.57141	3.60968	3.68334
CG13965	3.96631	4.25125	4.32873	3.51979	4.68414	3.98996	2.58861	2.88555	2.73775	5.81335	2.79011	3.01758	5.04874	5.06676	4.97282	4.68505	4.38623	4.62171	3.29497	3.77186	3.4725	3.39579	4.05366	4.55338	4.79299	4.77251	4.62487	4.7362	5.42336	4.70233	3.46941	3.20461	3.19699	3.17154	3.50275	3.41592
Gpdh	7.85117	7.89327	7.78048	7.37534	7.62308	7.48492	7.43371	7.53032	7.63736	7.50879	7.34294	7.34797	8.91116	8.72798	8.75276	8.49258	8.67976	8.42261	8.61405	8.36346	8.4122	8.37046	8.42342	8.23211	8.70954	8.74911	8.81186	8.48503	8.4924	8.50631	8.37093	8.23412	8.40927	8.32945	8.06225	8.16536
CG17118	-0.929247	-0.808778	-0.824609	-0.530861	-0.436855	-0.500386	-0.575088	-0.542245	-0.400876	2.11659	-0.873454	-0.600121	-0.373154	-0.44883	-0.210638	-0.395107	-0.243361	-0.445655	-0.267298	-0.439174	-0.0692581	-0.191345	2.16368	3.05534	-0.419003	-0.153429	-0.129494	0.00871328	1.53671	-0.0596713	-0.270042	-0.235254	-0.25938	-0.431866	-0.55175	-0.0677159
CG9903	1.71408	1.63995	1.44122	2.1717	2.09621	1.45871	2.32494	2.07532	2.37144	1.90286	1.51441	1.45797	2.62244	2.75128	2.58544	2.8459	2.63122	2.96116	2.87006	3.2983	2.93842	2.54898	2.60827	3.00366	2.55073	2.54148	2.52718	2.84489	2.95699	2.73369	2.8654	2.89889	3.03249	2.60408	2.71583	2.56437
CG12448	-0.703279	-0.852938	-0.703242	-0.866453	-0.805141	-0.818214	-0.963065	-1	-1	2.13744	-1	-0.804527	-0.879988	-1	-0.951115	-0.845963	-0.956359	-0.750023	-1	-1	-1	-0.957425	2.28147	3.3916	-0.941036	-0.855811	-0.969133	-0.692192	0.763035	-0.898025	-0.881009	-0.884202	-0.800679	-1	-0.922512	-0.838342
comm2	4.42201	4.32817	4.25356	4.26078	4.24214	4.19381	4.14447	4.24771	4.33253	4.63333	4.44712	4.50814	4.74572	4.69241	4.83061	4.69061	4.39389	4.88187	4.65274	4.71319	4.65618	4.64224	4.45881	4.41388	4.76006	4.63065	4.67723	4.6248	4.80431	4.67788	4.6648	4.77405	4.69333	4.69567	4.7672	4.80043
CG9377	3.9404	4.52833	3.44988	4.48154	5.33824	4.24681	4.19814	4.3724	4.60292	2.88213	1.94381	3.19182	4.47674	4.86175	4.3371	4.70532	4.61805	4.52702	3.41667	3.72329	3.78874	2.6228	2.50188	2.30807	5.50388	5.63636	5.45212	6.12696	6.68265	5.96559	5.07159	5.49942	5.27743	4.2291	4.13955	5.17057
Adgf-C	0.916991	1.17466	0.959795	1.17272	1.3325	0.963063	0.569946	0.824974	0.557772	1.00772	0.766672	0.894628	2.11028	2.06552	2.30029	2.53212	2.39999	2.1855	1.58306	1.57679	1.74743	1.87853	1.79125	1.75132	1.70656	1.78402	1.50705	2.08652	1.70367	2.10984	2.00717	1.89308	1.62474	1.37266	1.885	1.41753
CG15528	4.19829	4.36178	4.1907	4.49461	4.78475	4.37671	4.37104	4.47033	4.35054	4.53204	4.48786	4.41384	5.00385	5.02345	4.95456	5.59465	4.91398	5.25283	5.0653	5.01966	5.10728	5.10765	4.88956	4.79033	4.64992	4.46796	4.52458	5.0898	5.06102	5.25955	5.05466	5.06012	4.84442	4.75553	4.74817	4.82855
CG12158	5.42057	3.28545	3.01079	6.45744	7.42333	5.52465	4.8481	3.18996	3.93664	6.83186	4.92682	5.13007	5.24743	5.59394	6.22905	7.67815	7.53106	6.41865	0.170139	-1	5.18518	4.5949	4.38457	5.06723	5.43065	5.50191	5.44115	7.16714	7.30837	7.28504	7.10438	7.0785	6.71174	4.37464	6.85348	4.00461
CG6569	-0.489335	-0.330262	-0.294173	-0.204254	-0.083462	-0.152618	-0.341203	-0.341519	-0.366836	2.54322	-0.215101	-0.0743286	-0.212565	-0.116775	-0.135665	-0.0573074	-0.152258	-0.527973	-0.269258	-0.451795	-0.486303	-0.280881	2.33346	3.2175	-0.10975	-0.135217	-0.135641	0.0844538	1.54993	0.305213	-0.0774483	-0.213082	-0.0287651	-0.284065	-0.103094	0.102165
CG14275	4.48589	4.47214	4.47795	4.53149	4.87092	4.34808	5.04511	5.18007	5.13011	5.51349	5.01631	5.21969	5.21563	5.17906	5.31515	5.59189	5.39372	5.30911	5.6586	5.79444	5.75681	5.586	5.59067	5.48201	4.72132	4.7628	4.71617	5.03693	5.09558	5.15384	5.81358	5.56593	5.62975	5.35711	5.51453	5.41433
CG17323	5.58352	5.63119	5.71434	5.38275	5.18541	5.6147	5.61526	5.78388	5.8212	5.00604	5.30113	5.41706	6.29493	6.34658	6.29201	6.08272	5.94368	5.98873	6.07553	5.93381	6.00697	6.16382	6.0652	6.00739	6.52853	6.49943	6.75399	6.36968	6.23607	6.33525	6.19356	6.14562	6.23155	6.25193	6.08888	6.26739
CG11368	5.22392	3.25866	3.66806	6.17461	6.82794	5.35693	4.54526	3.1256	3.75313	6.2874	5.02556	5.19284	5.48332	5.56456	6.10618	7.47021	6.2751	6.1552	1.50933	1.2474	5.0053	4.86769	4.46093	5.00307	5.51412	5.42132	5.4968	7.02997	6.91156	6.99918	6.92906	6.99571	6.63396	4.18809	6.63111	3.88456
CG1701	-1	-0.958547	-0.937447	-0.890257	-0.741287	-0.795872	-0.950062	-0.826236	-0.854806	0.685249	-0.933548	-0.953375	-0.694754	-0.925271	-1	-0.945832	-0.884402	-1	-1	-0.65915	-0.964111	-0.833881	1.24413	0.947804	-1	-1	-0.958235	-0.89999	-0.0586804	-1	-0.934141	-1	-0.880657	-0.936335	-0.946928	-1
Cpr100A	2.35239	2.3424	2.01287	1.97485	1.4976	1.30075	1.43406	1.32232	0.973023	2.11967	1.37879	3.58415	2.96628	3.51664	3.49428	3.26986	2.34946	3.02187	2.06029	2.29829	2.179	2.90644	2.72139	2.69785	3.17528	2.96316	2.91676	3.27968	2.76656	3.4681	2.8823	2.46436	2.57567	2.69354	3.31267	2.82053
CG34220	12.5804	12.5609	12.5581	12.2801	12.3513	12.0992	12.547	12.4213	12.6092	12.28	12.3574	12.1445	12.7606	12.5744	12.6879	12.6339	11.6126	12.7306	12.7611	12.8915	12.7594	12.9313	12.75	12.6015	12.6572	12.5405	12.5277	12.577	12.7636	12.6567	12.6806	12.697	12.6858	12.7794	12.7056	12.6817
CG4576	1.11004	0.995803	1.24646	1.30991	0.992064	1.52848	2.07048	1.99307	2.21825	1.35127	1.70783	1.63643	1.03569	1.37907	1.29856	1.37622	0.971416	1.23111	2.81225	2.80737	2.92994	1.98331	1.88109	1.83801	1.12761	1.67906	1.09221	1.39758	1.23909	1.65835	2.76763	2.71753	2.87667	2.27586	2.04832	2.11269
yellow-e	5.02181	4.76975	5.17319	5.1202	5.3711	4.75725	5.79978	5.81004	6.12052	5.09582	4.92951	4.71963	5.00621	5.2834	5.35376	5.33281	5.31589	5.22075	5.28108	5.43749	5.03817	4.54736	4.53652	4.49836	5.58766	5.76102	5.84154	6.17467	5.83123	6.1899	6.53368	6.38093	6.38791	5.64017	5.85983	5.55285
CG1814	6.21231	6.24549	6.23589	6.31363	6.35773	6.34339	6.33251	6.30787	6.32303	6.10932	6.27708	6.33868	6.84165	6.84675	6.72914	6.87529	6.83034	6.8597	6.95544	6.85394	6.90345	6.93737	6.84072	6.81633	6.67612	6.58566	6.65036	6.65993	6.65919	6.78172	6.65801	6.58388	6.52689	6.65223	6.57811	6.74779
CG33138	6.71971	6.68581	6.80946	6.55536	6.66859	6.70183	6.47351	6.59156	6.48314	6.62213	6.81893	6.8054	7.20957	7.15808	7.06441	6.93963	6.95791	6.91569	6.93219	6.97715	6.99694	7.00895	7.01174	6.89863	7.15154	7.0913	7.23445	6.93119	6.93983	6.94873	6.87942	6.81445	6.86874	6.86049	6.83348	6.88406
lectin-21Ca	-0.856344	-0.87757	-0.936666	-0.924997	-0.929982	-1	-0.949436	-1	-1	0.622947	-0.932719	-0.907076	-0.762463	-1	-1	-1	-1	-0.953817	-1	-1	-1	-0.831879	0.551506	0.0837331	-0.919501	-1	-0.95771	-1	-0.196256	-1	-1	-1	-0.91835	-0.93554	-1	-0.953691
CG6083	4.03189	4.17614	4.15927	4.31923	4.23114	4.29718	4.49313	4.59471	4.61045	4.355	4.19156	4.1775	4.85053	4.89494	4.88898	5.05639	4.69548	4.92154	4.99264	4.85784	5.05573	5.11793	5.01393	5.04592	4.19904	4.4693	4.19102	4.40789	4.71079	4.65783	4.66299	4.51049	4.56447	4.52524	4.54986	4.71369
Adh	1.37169	1.78769	1.43404	1.65108	1.45018	1.62483	1.72587	1.90612	1.90984	1.04668	1.37478	1.10638	2.04653	1.94911	2.21953	2.16106	2.18822	2.39911	1.58578	2.03799	1.99978	1.90417	2.0477	2.0918	2.35583	2.379	2.16792	2.08718	2.33179	2.34048	2.45495	2.33015	2.27328	2.07753	2.05136	2.12942
CG43165	0.979346	0.337404	0.77489	0.93361	1.94672	0.966333	0.733889	-0.210237	0.218025	1.40825	0.702449	0.913733	1.60837	1.35522	1.58754	1.57697	1.42492	1.74542	1.5578	1.86234	1.59651	1.62951	1.43319	1.57863	0.988428	1.3633	1.50658	1.27555	1.8655	1.68648	1.90479	1.9649	1.72912	1.1679	1.02586	1.65114
Obp56g	4.24439	2.35483	2.14813	5.19614	5.64297	4.96426	3.92646	2.08522	2.85338	5.14723	3.65789	3.94229	3.92629	3.9503	4.83257	6.15977	5.85283	4.98609	0.111968	-1	3.84491	3.05214	3.16785	3.67076	4.28112	4.3042	4.34879	5.97414	5.77265	6.0631	6.00257	5.79104	5.48347	3.16398	5.16322	2.81329
Got2	6.43364	6.45018	6.50397	6.06705	6.31826	6.017	5.87726	6.11004	5.98604	6.33882	6.43834	6.30159	6.79329	6.69113	6.62837	6.49402	6.52393	6.38186	6.34826	6.50006	6.45329	6.28068	6.49028	6.2024	7.20067	7.08024	7.05326	6.84648	7.1656	6.95542	6.85491	7.03675	6.95142	6.72136	6.83461	6.73622
CG3394	2.83243	2.9439	2.79525	3.11283	2.81906	2.92032	3.08285	3.11564	3.27526	3.29249	3.17699	3.18915	3.16204	3.17605	3.14774	3.34239	3.35781	3.33383	3.27716	3.54558	3.56782	3.30209	3.6386	3.89944	2.94962	2.92982	2.83418	3.30087	3.13404	2.97635	3.46352	3.61666	3.45057	3.30862	3.25717	3.19843
mre11	2.09783	2.44434	2.45727	2.60906	2.8005	2.75144	2.34968	2.26893	2.41095	2.67471	2.36628	2.56624	3.50341	3.4063	3.67895	3.44884	4.0883	3.58548	3.42529	3.43849	3.33492	3.33152	3.46646	3.50528	2.43217	2.50557	2.61421	2.71006	2.76667	2.95246	2.31825	2.37558	2.36304	2.43069	2.44929	2.54603
CG10513	5.10402	5.25224	5.09114	4.20827	4.69693	4.73257	3.47047	3.36084	3.57782	5.73651	3.7822	4.04563	6.00249	6.32481	5.42288	4.60843	4.90466	4.71617	4.50019	4.77358	4.45885	4.34172	4.62568	4.42512	5.7441	5.82883	5.88834	4.8409	5.13638	4.94383	4.22626	4.29256	4.7544	4.35019	4.17899	4.63358
CG9090	9.59923	9.4992	9.52398	9.14142	9.68372	8.94882	9.30878	9.28326	9.31158	9.3437	9.1145	9.10063	10.4312	10.0804	10.2318	9.95973	10.0926	9.73187	10.3986	9.91492	10.1325	10.2572	10.1657	9.83548	10.1824	10.2643	10.3867	9.9477	10.2472	10.1159	9.80921	9.75743	9.99063	9.91946	9.70249	9.5977
Cyp4aa1	3.45517	3.56339	3.39534	3.26927	3.03525	3.54476	3.51688	3.19029	3.44244	2.37103	2.65594	2.87249	3.65572	3.71199	3.65529	3.42576	3.53305	3.46637	3.50471	3.66082	3.65648	3.24881	3.56121	3.27094	3.55835	3.61477	3.53198	3.49249	3.38877	3.55866	3.35618	3.37977	3.52623	3.15171	3.15766	2.96875
CG14694	3.03417	3.14956	2.59086	3.8513	3.55362	3.31066	3.00131	2.92009	3.27583	2.97726	2.36308	2.60991	3.32096	3.58861	3.56016	4.73828	4.28571	4.00756	3.01417	3.00047	3.39426	2.69406	2.69477	2.92788	2.72507	3.18289	2.64878	4.04721	3.65627	3.90438	3.93353	4.01458	3.65983	2.42231	3.42016	2.57282
Mf	9.86431	9.78804	9.73648	9.44301	9.61115	9.33659	9.63454	9.56882	9.56441	9.39663	9.47528	9.46027	10.8125	10.6558	10.8431	10.5896	10.3156	10.5462	10.7966	10.596	10.6272	10.6148	10.6258	10.3901	10.2915	10.3722	10.4053	10.2939	10.3163	10.3076	10.299	9.99832	10.1682	10.1711	9.87654	10.1282
CG31871	0.658133	0.597641	0.649963	0.295389	0.436582	0.295373	-0.0149414	0.0877127	0.28026	0.0432723	0.184125	0.55295	1.41578	1.90277	1.21321	1.53297	1.39158	1.46766	1.44127	1.52579	1.62544	1.7454	1.80075	1.47052	0.689018	0.823538	0.435954	0.768501	0.0901814	0.480212	0.650428	0.731579	0.661302	0.700845	0.581139	0.527819
CG2064	2.70113	3.22217	3.28943	2.84215	3.01508	2.74589	2.31209	2.59371	2.41998	3.11365	2.48596	2.88295	3.2202	3.35378	2.89417	3.17135	3.1274	3.00885	2.8888	3.02368	3.04629	3.13348	2.8111	2.80446	3.63442	3.71346	3.47311	3.78939	3.89684	3.72593	3.96791	3.94359	3.82729	3.41637	3.58512	3.60341
CG9400	2.84938	2.85375	2.75236	3.61542	3.89751	3.28066	3.46609	3.23505	3.37103	3.27177	2.58733	3.15816	3.17143	3.23131	3.49233	4.08474	4.13207	3.76603	3.4627	3.77178	3.70338	3.43523	3.18996	3.17829	2.97494	3.11211	3.04847	3.82178	3.65132	3.94657	3.90759	3.83335	3.6047	3.45256	3.40731	3.24936
capu	3.2343	3.23672	3.2448	3.30104	2.82132	3.25754	3.25945	3.14436	3.12358	2.93403	2.86025	2.8817	3.47488	3.60732	3.44464	3.49293	3.57977	3.58561	3.50396	3.46986	3.37108	3.28662	3.69856	3.99307	3.33037	3.25412	3.32059	3.39248	3.31338	3.3662	3.40352	3.41296	3.4644	3.29867	3.29568	3.2513
CG6044	4.55402	4.65989	4.53479	4.46367	4.67307	4.52995	4.51001	4.51554	4.5282	4.32831	4.42108	4.43121	5.0998	4.9071	4.99136	4.97087	4.75528	4.86496	4.99	5.0442	5.05376	5.18683	5.05934	5.04405	5.00223	4.9959	4.99819	4.98247	4.99383	5.12302	5.01626	4.97488	5.03151	5.09586	4.94724	5.05241
cbt	5.48886	5.36824	5.47952	5.09887	4.83617	5.08343	5.03537	5.29561	5.21781	5.02912	5.08252	5.14447	5.48582	5.62628	5.21789	5.21674	5.0033	5.31056	6.25152	6.18497	6.05351	4.88292	4.78175	4.84216	5.7047	5.51122	5.44465	5.31598	4.99512	5.3869	6.08829	6.09225	6.04166	5.01346	4.98724	5.06682
CG16820	2.99067	2.77125	2.89652	3.39436	3.7624	3.47755	3.68109	3.45882	3.6029	2.74581	2.07343	2.68282	3.517	3.69337	3.54897	4.35751	4.0351	4.09966	4.00536	3.81392	3.69264	3.18722	3.1613	2.9915	3.43861	3.49023	3.31308	4.13884	4.07147	4.23324	3.63368	3.44204	3.65309	3.13694	3.28396	3.16458
CG5214	8.52871	8.5269	8.48975	8.46471	8.5902	8.38825	8.54443	8.49524	8.4936	8.33734	8.2848	8.32468	9.06647	8.87715	8.98027	8.8465	9.04458	8.85001	9.10872	8.90343	8.9942	9.02144	8.9301	8.79146	8.8777	8.92748	8.89576	8.80021	8.97534	8.94252	8.81445	8.78442	8.80647	8.85351	8.70362	8.73462
Ugt37b1	3.0992	3.09414	2.93969	3.01625	3.03191	2.47339	2.91119	2.83122	2.73911	3.59048	3.56028	3.03726	3.65536	3.75202	3.55063	3.06512	2.57548	3.45525	2.76727	3.06534	3.1191	3.25665	3.30447	3.70057	4.22518	4.13796	4.08739	3.67105	4.04702	3.52441	3.64377	3.91756	4.27178	3.75084	4.07806	3.5357
CG10063	-0.837781	-1	-0.928224	-0.55223	-0.640902	-0.60501	-1	-1	-1	3.54063	-0.479847	-0.946457	-0.253162	-1	-1	-0.820962	-0.932338	-0.755271	-0.688452	-1	-1	-1	2.15419	3.41892	-0.490089	-0.941913	0.630561	-0.0988004	2.52204	-0.702486	-0.924443	-0.715748	0.0649023	-1	-0.939073	1.12896
Cpr66D	4.93275	5.30376	4.89948	5.12637	5.48032	5.12966	5.16643	5.28311	5.44607	5.71971	5.54337	5.92332	4.5451	4.59016	4.25003	4.94502	4.31639	4.8196	4.95908	4.97664	5.03266	5.06418	4.84328	4.63199	4.574	4.13085	4.41584	4.63377	5.07572	4.68959	4.79952	4.94689	4.65901	4.78037	4.92088	4.98977
dob	3.72023	4.01163	3.88273	3.19772	3.58244	3.12164	3.28714	3.38387	3.55636	3.65798	3.30073	3.53518	4.04469	3.75488	3.72432	3.19691	3.09644	3.6409	3.53249	3.99191	3.90983	3.38503	3.65413	3.3698	3.80134	3.68734	3.5324	3.24325	3.37808	3.20935	3.75555	4.02949	3.60049	3.39925	3.60379	3.54125
CG6836	4.05549	4.12336	4.01744	4.06839	4.05206	4.07928	3.63502	3.68063	3.63862	3.96111	3.76874	3.88488	4.31445	4.47188	4.36239	4.49159	4.07867	4.43253	3.80891	4.06597	3.99647	4.05772	4.01452	3.95238	4.27061	4.46058	4.33672	4.36539	4.37943	4.49375	4.18168	4.16339	4.12214	3.88974	4.09449	4.08271
CG16772	9.01118	9.02468	9.18626	8.46748	8.75906	7.96186	7.6314	7.69483	7.93143	8.39486	8.07507	8.20743	9.45477	9.69933	9.59928	9.14596	8.71696	8.962	7.76983	8.10645	7.9968	8.43054	8.43485	8.43773	9.62016	9.74918	9.49913	9.09027	9.15967	9.18334	8.28351	8.21944	8.06842	8.52519	8.81503	8.62632
CG9657	2.62218	2.63797	2.66817	2.62636	2.79335	2.70152	2.34051	2.27509	2.25815	2.57012	2.24174	2.22678	3.12015	3.15485	3.02323	2.82237	2.73774	2.99042	2.76535	2.85707	2.79889	3.10146	2.93	2.74573	3.70988	3.68882	3.69096	3.39035	3.62387	3.57911	3.58768	3.32583	3.42639	3.54499	3.38633	3.46916
CG33177	0.974209	0.281902	0.463475	0.481036	-0.199257	-0.0598743	-0.153343	-0.264584	-0.415051	-0.40502	-0.0813125	0.419606	1.33952	2.15917	1.46189	0.696141	0.969091	0.614837	0.474987	0.508823	1.74616	0.757859	1.10894	1.44111	0.768959	2.12971	1.35208	0.918199	-0.189952	1.51033	0.680624	0.515108	1.63523	0.830522	0.79797	0.805042
CheA46a	2.01716	0.0281154	0.453106	2.43513	3.32164	2.19044	0.786098	0.209201	0.0272772	2.10635	1.85175	2.04631	1.92906	1.47232	2.32378	3.63651	3.37717	2.63169	-1	-1	1.52604	1.67051	1.50302	1.95925	1.67902	1.74983	1.75703	3.31291	3.15737	3.26802	3.27198	2.89681	2.45184	0.141768	2.56343	-0.243787
CG11029	3.41351	3.67716	3.21349	3.30745	3.41481	3.67321	3.61573	3.51876	3.59378	2.66209	2.49097	3.13859	3.57129	3.41282	3.57664	3.5003	3.80591	3.77396	4.2341	4.16048	4.15624	3.64184	3.55222	3.42374	3.21621	3.14692	3.28174	3.58378	3.58733	3.57269	3.50014	3.43526	3.60849	2.90154	2.78937	2.95647
ND75	8.9827	8.90372	8.97816	8.79945	8.71203	8.79175	9.01095	8.95245	8.93876	8.51994	8.75714	8.81164	9.16122	9.11831	9.14001	9.0459	9.39289	9.01116	9.39857	9.14695	9.2449	9.21558	9.12499	8.9743	9.20066	9.26381	9.27005	9.07332	9.16722	9.18059	9.07969	9.16733	9.1395	9.14379	9.11669	9.0006
CheB53a	2.59166	0.696555	0.990377	3.22328	3.3426	2.76325	1.13662	0.591202	0.958384	1.63537	1.70827	1.47137	2.21991	2.33155	2.54429	4.33121	3.51885	3.57619	-0.802943	-1	2.11705	1.39643	0.787626	1.41531	1.82763	1.84531	2.06176	3.92129	3.20918	3.64318	3.36378	3.67782	2.98813	0.136429	2.1036	0.0570181
CG9394	4.74897	4.6489	4.76761	4.82185	5.13196	4.86859	5.1049	5.02743	4.9642	5.15344	4.98137	4.94692	5.34615	5.40832	5.2737	5.21931	5.54163	5.25052	5.60997	5.5747	5.59944	5.42081	5.1906	5.12949	5.21317	5.22961	5.26526	5.31395	5.66082	5.52646	5.46121	5.4423	5.6074	5.15971	5.0628	5.09598
CG1315	3.35426	3.64436	3.39641	3.8817	4.0523	3.91185	4.01739	4.02338	4.10768	4.73885	3.85777	3.7824	3.99033	4.76684	3.87472	4.21988	4.3109	4.32887	4.23428	4.39007	4.12237	4.02104	4.46387	4.85614	3.96284	3.88513	4.01685	4.14806	4.64916	4.29809	4.00171	4.07783	4.40896	4.25744	4.54611	4.20243
Pdp1	4.76478	4.66561	4.53041	4.5103	3.71742	4.38169	5.15781	5.17637	5.34753	4.58867	5.69009	5.35615	4.41968	4.33436	4.64969	4.74266	4.25001	4.69676	5.52283	5.50849	5.54785	5.66477	5.6244	5.6204	4.95015	4.74418	4.73614	4.84946	4.03821	4.52355	5.71154	5.67094	5.61065	5.82065	5.89587	5.94005
CG13639	1.02	0.877378	1.7226	0.442866	0.433852	0.278137	1.34838	1.57474	2.16769	1.907	1.12542	1.07517	0.632961	-0.0178697	0.163836	0.441419	0.2391	0.287167	0.696422	1.09074	1.08231	1.63791	2.09007	1.54513	1.50537	1.97066	1.59207	0.918476	1.42692	0.821647	1.97372	1.98948	2.07765	2.09455	2.16098	2.32125
Cyp4p1	5.25157	5.19875	5.19729	5.42028	5.24358	5.30385	4.57223	4.8486	4.73093	4.6341	4.92788	4.96738	5.96355	6.04464	5.95591	5.94494	5.93882	5.93287	5.52306	5.77658	5.70426	5.29967	5.2779	5.32421	5.63516	5.42085	5.55284	5.43192	5.63999	5.68625	5.48075	5.40388	5.38695	4.98828	4.96733	5.07948
ppk23	2.09623	1.40502	1.09274	3.03427	1.93047	2.46743	1.20556	0.416117	1.08398	1.84249	1.87544	2.44741	1.83922	2.03863	2.24688	3.72746	2.84724	2.55015	-0.654356	-0.17977	1.98454	1.78459	1.54132	1.42461	2.04694	2.26964	1.96302	3.53194	2.37479	3.32597	3.52177	3.41618	3.15675	1.50247	3.07539	0.730358
CG14502	3.05947	2.46903	1.86037	3.98174	4.34247	3.3806	2.08046	1.30432	2.02236	3.7671	2.73095	3.40896	2.97502	3.33122	3.33339	4.78906	4.14944	3.76776	0.508021	0.776667	2.57985	2.62481	2.08369	2.74429	2.84361	2.90556	2.86708	4.46932	4.15016	4.49198	4.44805	4.20382	4.04382	2.52597	4.09951	2.13167
CG30440	2.46207	2.3981	2.24285	2.8772	2.80039	2.64262	2.40726	2.48759	2.54165	2.62631	2.6956	2.69573	2.62781	2.74472	2.5882	3.07235	2.58468	2.96562	2.62542	2.72301	2.79449	2.53333	2.37228	2.4179	2.78369	2.92072	2.64408	2.95916	2.71313	2.7376	3.08285	2.86436	2.81801	2.70832	2.70454	2.77634
Tsp47F	2.2779	1.73221	1.45748	3.08514	2.60304	2.25816	1.37235	1.26176	1.76482	1.84638	1.80196	2.41824	2.17038	2.48375	2.65304	3.47868	2.67794	2.79653	0.98988	0.989907	2.21318	1.77744	1.45555	1.74104	2.3329	2.58929	2.37992	3.39321	2.76509	3.448	3.37648	3.08715	3.08255	1.73812	2.97987	1.77509
Gycalpha99B	3.86066	3.88348	3.88059	3.73062	3.94239	3.70616	3.7981	3.80911	3.81823	3.75313	3.66467	3.64403	4.20374	4.02418	4.08571	4.03345	4.37338	3.88578	4.23684	4.07821	4.15354	4.38198	4.20217	4.16381	4.14266	4.13544	4.23623	4.10244	4.24348	4.28009	4.20443	4.2514	4.25515	4.24112	4.12014	4.17931
CG31344	3.57465	3.64156	3.58795	3.49763	3.65801	3.55381	3.42933	3.56145	3.51236	4.03243	3.7265	4.00757	3.88664	4.00203	3.98879	4.01379	3.83833	3.78545	3.79596	3.78901	3.96445	4.34516	4.27757	4.19857	3.79142	3.79225	3.60372	3.69115	3.57325	3.72659	3.71535	3.58776	3.77781	3.79215	4.1148	4.02817
sle	1.24221	1.40764	1.23167	1.60815	0.496022	1.58496	1.37535	1.41908	1.35438	1.6327	1.61633	1.57895	1.3961	1.31132	1.48718	1.49006	1.78284	1.51265	1.32953	1.46014	1.50452	1.51738	2.42264	3.33026	1.60515	1.61785	1.72158	1.74985	1.75953	1.43678	1.63872	1.46718	1.5408	1.65	1.63807	1.97696
CG10824	4.56026	4.58959	4.57762	4.42111	4.57044	4.61249	4.1841	4.39874	4.29277	4.48536	4.38667	4.4765	4.63087	4.78693	4.57596	4.60567	4.48055	4.58185	4.05942	4.54337	4.44647	4.23253	4.55845	4.59003	4.69246	4.59809	4.66646	4.75369	4.7664	4.92557	4.66709	4.7645	4.75194	4.71921	4.96134	4.93861
ERR	3.9632	3.972	3.89664	4.02239	3.63739	3.95267	3.97166	3.97183	3.96445	4.36959	4.25949	4.14189	4.11122	4.05971	4.01939	4.13932	3.90651	4.11915	3.99105	4.16915	4.13771	4.27355	4.54294	4.62782	4.12106	4.13711	4.20504	4.13239	4.12923	4.17405	4.14343	4.23032	4.29053	4.55651	4.6478	4.61637
CG11149	2.73728	2.89486	2.7665	2.67196	2.06009	2.30969	2.76315	2.42799	2.67038	3.4314	3.26564	3.11586	2.88512	3.18737	2.70613	2.63677	2.39719	2.73013	2.59114	2.70884	2.62912	2.87337	3.18877	3.39302	3.30816	3.09453	3.18718	3.08491	2.78993	3.03877	2.97078	2.93755	3.14867	3.54496	3.64735	3.50876
Side	1.15564	1.12214	1.14537	0.973728	1.31791	0.993603	0.847681	0.980003	0.865081	1.09129	1.0887	1.05351	1.03359	1.0572	1.34032	1.04931	1.16825	1.06798	0.862367	1.03037	1.06416	1.25671	1.42216	1.62874	1.35267	1.0675	0.932785	1.21593	1.54777	1.59753	1.32909	1.41138	1.22308	1.36519	1.33176	1.40395
dpr7	3.87029	3.97069	3.90758	3.94353	4.04943	3.96339	3.88329	3.88654	3.85645	3.782	3.75858	3.8182	4.27959	4.14663	4.22493	4.24821	3.90004	4.30428	4.18654	4.19518	4.29822	4.4579	4.38979	4.27488	4.32616	4.30623	4.26853	4.31884	4.15916	4.24155	4.33052	4.08729	4.30917	4.40301	4.07489	4.37807
CG14367	1.98349	2.03904	1.87366	2.39857	2.56191	2.0055	1.80732	1.77157	1.51533	2.55211	1.66519	2.15347	2.39687	2.44525	2.50281	2.88873	2.97551	2.41974	1.76476	1.94363	2.18373	2.17351	2.02912	2.15318	2.19064	2.41695	2.23713	2.87173	2.68463	2.95437	2.78737	2.73293	2.6642	2.25445	2.52457	2.16623
CG11275	4.40924	4.25555	4.36666	4.2432	4.2849	4.23214	4.04525	4.13358	3.97504	4.51952	4.31609	4.49192	4.7193	4.6811	4.68364	4.56345	4.72967	4.60892	4.30564	4.37087	4.47739	4.9748	4.94262	4.94771	4.4028	4.33499	4.34523	4.24791	4.32665	4.43971	4.00988	4.01076	3.99254	4.39379	4.60817	4.54505
Ance	6.73644	6.91	6.91189	6.37356	6.29747	6.38838	6.33209	6.49378	6.31404	6.80916	6.58136	6.5285	6.94418	7.11092	6.7915	6.61907	6.74839	6.55064	6.42328	6.50874	6.4872	6.88402	6.99138	7.22381	6.73464	6.57324	6.76115	6.54621	6.59537	6.50915	6.42803	6.45607	6.47522	6.47428	6.63078	6.5644
CG33965	2.20188	2.12244	1.59479	0.492635	0.846792	-0.021294	0.368263	0.376633	0.588561	4.07631	1.82133	1.90493	2.29968	2.93272	2.24106	1.57613	1.59373	1.36028	0.831733	1.51054	1.23879	2.57526	2.54302	2.68838	2.63148	2.67275	2.51903	2.35619	2.54262	2.6456	1.86639	1.63471	1.8357	2.95395	3.48953	2.87065
CR43611	3.83286	3.92521	3.57353	3.51748	4.37525	3.66797	2.88815	3.34327	2.86482	3.92293	3.38541	3.57166	3.7756	3.65965	3.76091	3.71692	3.07143	3.62407	3.50129	3.71459	3.6675	4.00466	3.78734	3.58819	3.71155	3.93522	3.50458	3.57314	4.19427	4.06437	3.68358	3.94993	3.54928	3.82801	4.01773	3.97202
Mpcp	8.52056	8.48515	8.55286	8.28802	8.22259	8.31041	8.20562	8.2455	8.24588	8.44925	8.31245	8.37443	8.92675	8.94612	8.85712	8.71654	8.68332	8.71404	8.75528	8.74985	8.76983	8.75435	8.7139	8.66835	8.78592	8.74862	8.80146	8.74295	8.78072	8.87814	8.65896	8.74531	8.78054	8.68974	8.74776	8.70497
CheA56a	2.27798	0.479608	0.0618792	2.37524	2.3399	1.94769	0.381549	0.0467986	0.0798265	2.5019	1.81415	1.96257	2.17057	1.70026	2.17676	3.39618	2.41322	2.69983	-1	-1	1.36487	1.65021	1.35078	1.40639	1.96435	1.47709	1.81251	2.85456	2.52199	2.65511	2.73156	2.64875	2.38889	0.277281	2.39588	-0.159582
CG7601	4.11161	4.15633	4.21969	4.17218	4.11508	4.02405	3.97928	4.00689	4.0768	4.46919	4.23312	4.37655	4.27861	4.33289	4.19312	4.25108	4.12869	4.24503	4.10743	4.22177	4.25649	4.32364	4.45049	4.48288	4.41504	4.52285	4.39464	4.50478	4.33028	4.5132	4.39207	4.41348	4.35052	4.5101	4.5291	4.53041
Spn77Bc	-0.690577	-0.414021	-0.62933	-0.461115	-0.168854	-0.432148	-0.448418	-0.602386	-0.683862	-0.380846	-0.509297	-0.641278	-0.767033	-0.682664	-0.717112	-0.433831	-0.50058	-0.46801	-0.46405	-0.564504	-0.44786	-0.379074	4.1805	-0.486225	-0.464436	-0.374561	-0.720705	-0.665429	-0.529774	-0.701133	-0.57812	-0.767217	-0.616971	-0.466521	-0.51832	-0.424927
CG17834	2.99121	3.09439	3.02867	3.07533	2.96514	2.94879	2.85174	3.03353	2.9216	3.14372	3.03075	3.05559	3.20402	3.30071	3.1409	3.20404	3.10564	3.13418	3.25402	3.28916	3.28343	3.03323	3.09384	3.14453	3.00139	3.1061	3.01664	3.12984	3.05161	3.19276	3.48963	3.41648	3.28367	2.94118	3.17674	2.98733
Atg6	3.65891	3.52282	3.68586	3.80667	3.90228	3.80779	3.64945	3.70942	3.5262	3.83528	3.65879	3.76791	3.9286	3.85685	3.86155	4.02989	4.20321	4.00573	3.91211	4.00232	3.95557	4.06819	4.01261	4.04869	3.7228	3.73872	3.63286	3.79778	3.87479	3.88713	3.76101	3.83586	3.72412	3.92475	3.77845	3.94111
CG5180	2.8621	2.68445	2.74865	2.85368	2.89223	2.94333	2.70378	2.71074	2.79425	3.17299	2.8581	3.0318	2.98057	3.172	2.77951	3.07261	2.74323	2.99608	2.97249	2.89636	3.08404	3.24592	3.16114	3.32382	2.92473	3.03465	3.00523	2.99826	3.16028	3.23978	2.97628	3.12965	2.95449	3.09024	3.15312	3.0053
TSG101	6.21502	6.17249	6.19994	6.34763	6.37788	6.33956	6.24256	6.1719	6.30474	6.29651	6.21705	6.37236	6.4116	6.55065	6.41751	6.41637	5.78053	6.43634	6.4081	6.39931	6.43453	6.47046	6.56605	6.58609	6.43489	6.47416	6.36272	6.36524	6.48688	6.36293	6.41513	6.47562	6.35496	6.55656	6.41185	6.5411
CheB42a	5.16298	3.09912	3.22606	5.62577	5.79815	5.20853	3.66317	2.63056	2.87503	5.21927	4.61042	5.15672	4.78708	4.61848	5.21794	6.56468	5.70717	5.48187	1.0073	0.905268	4.25146	4.30387	4.18652	4.58609	4.50851	4.30331	4.64806	6.08478	5.79371	5.98631	6.02169	5.76694	5.36647	3.14849	5.53658	2.27386
Invadolysin	5.47354	5.59368	5.49148	4.73525	3.90654	4.68513	4.28387	4.22567	4.26757	3.98666	4.61902	4.5634	5.83899	5.77797	5.76907	4.78906	4.72662	4.85172	4.8073	4.59476	4.54312	5.05087	4.86604	4.92953	6.04073	6.03023	6.0576	5.0311	4.58393	4.91419	4.9747	5.01462	4.98221	5.10266	5.1439	4.99525
CG8520	6.61448	6.50976	6.53764	6.45537	6.5472	6.45152	6.47337	6.54488	6.50028	6.33336	6.25286	6.31804	6.73159	6.59578	6.60305	6.65102	6.73929	6.55814	6.75238	6.60314	6.69919	6.63761	6.60465	6.48443	6.5277	6.58179	6.53128	6.47425	6.59623	6.59653	6.49321	6.47842	6.39393	6.44606	6.34222	6.47946
DhpD	4.8365	4.90181	5.02676	5.07116	5.21746	5.3096	5.03914	5.17472	5.15368	5.13061	5.00012	5.15142	5.37451	5.32039	4.99837	5.51627	5.29077	5.42119	5.31083	5.43539	5.34667	4.96619	5.18496	5.06969	5.17982	5.10088	5.19254	5.59937	5.67464	5.62387	5.37073	5.38536	5.6086	5.11054	5.27831	5.12397
CG4502	4.2231	4.16893	4.18657	4.30688	3.78691	4.38094	4.28625	4.31483	4.32793	4.41002	4.44168	4.32747	4.37495	4.46826	4.43469	4.54521	4.32757	4.42392	4.5077	4.52122	4.57321	4.62421	4.61923	4.74525	4.39498	4.4444	4.44498	4.46737	4.35127	4.46784	4.52357	4.57682	4.47983	4.4999	4.57666	4.61896
fu12	3.01756	2.88669	2.95242	3.35074	3.03119	2.96324	2.84794	2.68184	2.71546	3.35472	2.80313	3.1579	3.39286	3.59388	3.37428	3.49367	3.29326	3.28858	3.16358	3.33506	3.26256	2.81712	3.27201	3.56257	2.86462	2.96992	2.6795	3.24179	3.22783	3.31154	3.40904	3.40025	3.11506	2.63031	3.06907	2.79367
CG9747	2.74787	3.15367	2.86159	3.02777	2.71824	3.47736	3.48999	3.49273	3.44218	3.01046	3.18154	3.06683	2.99724	3.26142	3.20821	3.3775	3.57257	3.44305	3.81337	3.91886	3.95337	3.48994	3.46644	3.28169	2.78514	2.85055	2.8829	3.12412	2.99051	3.29276	3.52059	3.62969	3.44181	3.23225	3.10255	3.34279
CG31751	4.94816	5.07275	5.0013	5.0334	4.88832	5.06175	5.14299	5.23392	5.23012	5.2747	5.19145	5.238	5.15716	4.96161	5.03665	5.2451	4.91996	5.1965	5.24591	5.3533	5.38693	5.4343	5.50065	5.48039	5.151	5.11293	5.08071	5.21834	5.17464	5.23641	5.48467	5.40769	5.48446	5.54698	5.54035	5.61073
Cyp4e1	3.94331	4.18244	3.8967	4.14467	4.02125	3.69378	3.7821	3.8483	3.65004	4.18499	4.08113	3.88292	4.04459	4.35017	4.14674	4.10398	3.78431	3.99509	3.66386	3.76325	3.66381	4.04598	4.2932	4.1559	3.94485	3.94722	4.34114	4.18257	4.00158	4.15197	4.09368	3.96008	4.1547	4.34156	4.38327	4.22282
Men	8.0134	7.968	7.96318	7.64105	7.30617	7.76445	7.56005	7.75727	7.70294	7.10327	7.26803	7.19714	7.83991	7.73221	7.87342	7.39919	7.66915	7.55745	7.34177	7.70191	7.61054	7.22892	7.3735	7.4192	7.78375	7.73032	7.73837	7.69252	7.20022	7.49549	7.60448	7.87291	7.5611	7.12931	7.42612	7.2891
CG7461	7.25252	7.25829	7.24394	7.22355	7.18717	7.07089	7.11495	7.17831	7.16361	7.19615	7.22313	7.19954	7.33217	7.34826	7.32796	7.32729	7.46018	7.32978	7.28534	7.24764	7.31161	7.13299	7.32799	7.15224	7.41086	7.4795	7.49579	7.31275	7.3139	7.38391	7.515	7.40465	7.34647	7.41337	7.32031	7.35679
Psf3	1.55283	1.13006	1.51838	1.66744	1.52011	1.61717	1.35639	1.55492	1.2191	1.85423	1.70978	1.84901	1.4652	1.54962	1.5968	2.05954	1.44676	1.66742	1.4308	1.57743	1.55421	1.69582	1.80893	1.74938	1.76655	1.77098	1.75848	1.63296	1.68033	1.87391	1.80697	1.55063	1.71413	1.61456	1.7601	1.79827
CG14183	0.786421	0.835273	0.966722	1.16263	0.999706	1.23022	1.0411	1.18929	1.19743	2.08001	1.00417	0.969769	0.350994	0.121484	0.210735	0.293071	0.594853	0.372819	0.504653	0.311053	0.500934	0.245394	2.60151	3.2701	0.197132	0.331082	0.148383	0.371522	1.38438	0.372305	-0.0117581	0.235577	0.13805	0.0763121	0.0092362	0.541401
CheB42b	4.33721	4.23278	3.57562	5.38626	5.44871	4.44174	3.472	2.85038	3.87111	5.12322	4.01316	4.96618	3.95009	4.48714	4.66826	5.78631	4.88057	4.67996	0.352032	1.44741	3.60518	3.66785	3.41213	3.75337	4.13641	4.44448	3.8705	5.66354	5.30047	5.69935	5.81161	5.54292	5.27532	3.94001	5.33749	3.07312
CG12493	2.99411	2.91875	2.94349	3.39763	3.26694	3.52242	3.25073	3.35965	3.42012	4.74164	3.03382	2.74942	2.93497	2.67084	2.79087	2.76297	2.70617	2.92418	3.08528	3.22217	3.12904	3.09128	3.7349	4.64111	3.11094	3.24478	3.49352	3.35663	4.04187	3.50574	3.2769	3.41057	3.54684	3.19534	2.94344	3.73573
T48	3.88327	3.88867	3.7882	3.79709	3.71651	3.67686	3.62801	3.67903	3.66832	3.61035	3.76572	3.72711	4.14545	4.34034	4.22821	4.14692	4.22317	4.14814	4.01059	4.21618	4.09686	4.24682	4.1219	4.10704	3.90037	3.88991	3.7615	3.81792	3.75403	3.85204	3.86643	3.87927	3.78579	3.83113	3.76657	3.84338
Df31	4.76592	4.70594	4.72426	5.2081	4.86471	5.0445	4.93134	4.99281	4.96197	4.89166	4.90347	4.93005	5.09878	5.11781	5.12256	5.44027	5.46983	5.30873	4.99715	5.09756	5.19131	5.1005	5.20373	5.11507	5.09852	5.0716	5.08603	5.51925	5.22418	5.4372	5.3255	5.18207	5.18483	5.18217	5.25625	5.36052
CG18766	4.08954	4.17086	4.15284	4.32477	4.3872	4.35186	4.16108	4.16817	4.20309	4.28636	4.17819	4.27417	4.39017	4.47149	4.40805	4.47549	4.37179	4.49418	4.35463	4.41478	4.43164	4.48749	4.44572	4.34083	4.30176	4.34678	4.26153	4.46341	4.52827	4.53051	4.48921	4.39561	4.40379	4.3595	4.36014	4.3472
CR33218	-0.888249	-0.874564	-0.90368	-0.135287	-0.454977	-0.487754	-0.474918	-0.929805	-1	2.84696	-0.401514	-0.859413	-0.649106	-0.778844	-0.630683	-0.916463	-0.909158	-0.414604	-0.684216	-0.812976	-0.944463	-1	2.2978	2.83961	-0.712282	-0.847861	-0.502378	-0.359186	1.69968	-0.792114	-0.552283	-0.765057	-0.558174	-0.642515	-0.767149	0.235717
Gpo-1	8.46961	8.39297	8.44425	8.22881	8.44157	8.17325	8.39974	8.24398	8.41118	8.29175	8.17281	8.33966	8.56831	8.47065	8.55418	8.23574	8.49652	8.16244	8.71892	8.40333	8.51485	8.51148	8.47018	8.20106	8.61296	8.68365	8.72012	8.33588	8.50812	8.45622	8.4202	8.48015	8.42264	8.50582	8.35177	8.34215
CG13306	4.17114	4.00195	4.00284	4.35112	5.42842	4.4701	4.31821	4.30988	4.21206	4.99088	4.41782	4.51768	4.29394	4.54691	4.4165	4.59074	4.11177	4.56196	4.28575	4.61526	4.55093	4.45559	4.33734	4.38364	4.34404	4.41464	4.27639	4.62421	4.90454	4.67316	4.40347	4.48612	4.34824	4.52275	4.4637	4.60407
XRCC1	3.17159	3.0731	3.26804	3.36774	3.37791	3.45242	3.25001	3.23516	3.33294	3.19743	3.20688	3.47113	3.4115	3.48007	3.19735	3.50691	3.56508	3.51658	3.2775	3.46995	3.50667	3.42961	3.40808	3.55515	3.12899	3.06639	3.12753	3.27466	3.2559	3.45132	3.10742	3.10008	2.95849	3.17596	3.13901	3.33229
CG33301	5.11454	5.20338	5.60903	5.24917	5.46248	5.5153	4.97765	5.03149	4.94601	5.32122	5.22211	5.36296	5.82977	6.06491	5.40238	5.52569	5.61682	5.56229	5.4385	5.49647	5.33013	5.23051	5.33709	5.32183	5.25707	4.96242	5.10419	5.09682	4.90305	5.21854	5.05915	4.93455	5.29712	4.96755	4.84189	4.95522
comm	2.21777	2.10379	2.13105	1.99027	2.00803	2.01143	2.02194	2.01683	2.09672	2.11287	2.10873	2.20695	2.40872	2.48587	2.5874	2.32928	2.21848	2.46431	2.39335	2.49013	2.50717	2.44661	2.41579	2.47544	2.36861	2.54552	2.57889	2.4134	2.50723	2.56287	2.4213	2.28737	2.35243	2.36162	2.57575	2.50748
CG5174	5.45019	5.39423	5.51283	5.52984	5.54883	5.59077	5.41817	5.49928	5.5178	5.54794	5.46922	5.63546	5.77226	5.76709	5.61609	5.80348	5.74301	5.82031	5.73054	5.81818	5.72548	5.71471	5.77106	5.68788	5.50789	5.57552	5.47561	5.67384	5.71899	5.77367	5.63589	5.6475	5.69856	5.67876	5.64529	5.65086
CG10621	5.35404	5.23626	5.17758	5.78406	6.2184	5.67015	6.0847	5.87385	6.34223	4.95655	5.57107	5.01614	5.22704	5.34917	4.90371	5.16186	5.46275	5.49405	4.98398	5.38902	5.39457	4.71876	4.87554	4.56689	5.09911	5.1037	5.16138	5.67838	6.08267	5.58158	6.0524	6.26682	5.91942	5.44903	5.69087	5.49462
opm	4.7248	4.76	4.94672	4.84431	4.92894	5.00904	4.82835	4.85389	4.67263	4.97508	4.99675	5.09439	4.92855	4.94772	4.90107	4.9785	5.09008	4.9024	4.88855	5.07886	5.08719	5.19563	5.19875	5.05387	4.97094	4.94396	4.96604	5.03687	5.16699	5.17728	5.10713	4.94222	5.03307	5.14937	5.06441	5.23507
E2f2	3.40016	3.26596	3.26159	3.55128	3.51388	3.53582	3.33249	3.41339	3.30509	3.81048	3.33984	3.43532	3.58145	3.7051	3.4716	3.67121	3.69463	3.65149	3.41071	3.62258	3.5221	3.63886	3.78408	3.94718	3.60515	3.66228	3.71119	3.78769	3.951	3.81757	3.4529	3.40801	3.41212	3.64591	3.70084	3.80244
CG13390	3.64412	3.52483	3.52473	3.62491	4.26005	3.68787	3.69878	3.61931	3.57179	3.82356	3.60369	3.67424	3.86787	3.95977	3.56561	4.07054	4.18138	3.77747	3.85781	3.74882	3.96338	3.97623	3.6989	3.90817	3.71239	3.69578	3.75406	3.83152	4.2018	4.03216	3.81412	3.90228	3.74945	3.86002	3.95502	3.90293
CG31103	5.54986	5.51765	5.59979	5.80407	5.40826	5.69817	5.78005	5.7505	5.77764	4.97359	5.20414	5.37265	5.70678	5.83502	5.88109	6.08989	5.63821	6.0083	5.83378	6.03002	5.92531	5.6312	5.52323	5.39593	5.87804	5.97375	5.9201	6.14958	5.73635	6.15411	6.32134	6.13114	6.15731	5.74616	5.77537	5.7068
l(2)k01209	3.57167	3.60747	3.72431	3.98429	3.69189	3.96883	3.8511	3.9233	3.95909	3.87765	3.98149	4.16949	3.97214	3.87402	3.91491	4.05615	3.55644	4.07078	4.04311	4.02605	4.08072	4.17105	4.23863	4.24133	3.97251	4.01108	3.87152	4.10642	3.94229	4.10704	4.13729	4.07101	4.09423	4.25517	4.29796	4.4127
Vdup1	5.1947	5.09341	5.07732	4.91361	4.80858	4.91096	4.69318	4.71954	4.66112	4.9351	4.75967	5.01992	5.26162	5.32637	5.31811	5.28501	5.18358	5.13342	4.98517	5.0282	5.02878	5.5268	5.32203	5.26295	5.30543	5.36283	5.27909	5.26365	5.02209	5.32283	5.18986	5.09031	5.07551	5.36965	5.45375	5.41069
CG14439	6.04655	6.06355	6.11272	6.19472	5.91702	5.86203	6.07306	6.13087	6.0876	5.4942	5.71442	5.70234	6.0058	6.23956	6.1463	6.25944	6.02722	6.0538	5.99004	6.27427	6.18515	5.68988	5.61278	5.60925	5.96244	6.14657	5.92556	6.01797	5.74086	6.21607	6.44842	6.44784	6.3059	5.83903	6.08034	5.84161
CG6145	5.09725	5.13401	5.37659	4.96472	4.71189	5.20908	4.79094	5.06196	4.89988	5.27735	5.24617	5.58122	5.34032	5.56273	5.087	5.12137	5.02802	4.93334	5.02247	5.10972	5.11762	5.4535	5.6528	5.45787	5.1951	5.21434	5.35677	5.09796	4.75956	5.12571	5.00407	5.10931	5.07471	5.39983	5.50026	5.42369
nrv2	6.74231	6.87976	6.75981	6.65624	6.44374	6.70824	6.50841	6.44496	6.49768	6.41913	6.56161	6.57556	6.78171	6.71326	6.91104	6.70246	6.44061	6.70695	6.67803	6.66713	6.65845	6.77176	6.65694	6.61607	6.85475	6.89238	6.88284	6.7124	6.59613	6.72337	6.76234	6.63224	6.66544	6.69262	6.59711	6.67755
CG8531	4.80096	4.88497	4.89016	5.11626	5.01706	5.14	4.97304	4.8824	4.98804	5.31167	5.10317	5.12575	5.00659	5.01194	4.94455	4.97335	5.24766	5.01697	4.95106	4.91952	4.99673	5.1475	5.2895	5.42296	4.99675	5.06496	5.0005	5.02756	5.18007	5.06975	4.97721	5.02545	4.84576	5.13063	5.1382	5.22611
CG32795	4.39485	4.49569	4.45669	4.34036	4.47715	4.3103	4.23018	4.30241	4.18656	4.57887	4.18013	4.29219	4.57021	4.64897	4.51813	4.47948	4.44062	4.51196	4.14695	4.23538	4.24128	4.38901	4.53702	4.5484	4.67873	4.69046	4.75942	4.7512	4.88776	4.80682	4.64974	4.61761	4.7182	4.76828	4.80491	4.77728
CG15537	3.07413	3.0919	3.01221	2.84243	3.01312	2.91216	2.94571	2.99841	2.83144	2.82034	2.94079	2.78858	3.27656	3.25737	3.05788	3.05121	3.02718	3.03685	3.28233	3.13629	3.1942	3.45602	3.27377	3.09212	3.27915	3.12558	3.2382	3.03613	3.22108	3.09467	3.08617	3.25243	2.90157	3.33979	3.06136	3.23262
qsm	4.90916	4.85117	4.90395	4.87236	4.79604	4.78002	4.52596	4.51688	4.59013	4.55289	4.62333	4.80861	5.14169	5.16322	5.15907	5.27622	5.44575	5.22779	4.82929	4.80684	4.92228	5.07199	5.0146	4.98504	5.01714	4.9268	4.88284	5.05379	4.90892	5.1013	4.86392	4.84189	4.72504	4.85406	4.83812	4.90869
CG5510	4.42951	4.57918	4.61391	4.56649	4.75456	4.79887	4.50394	4.65646	4.65112	4.98987	4.67927	4.94135	4.54507	4.785	4.53952	4.69861	4.38702	4.69149	4.58774	4.58778	4.60932	4.6822	4.77257	4.91001	4.69914	4.61576	4.57818	4.82466	4.89932	4.92654	4.67231	4.71589	4.77426	4.66737	4.78942	4.87869
CG4259	1.89159	2.18158	2.13839	2.13407	1.67797	2.4509	1.72904	1.87199	1.89032	1.38884	1.42428	1.71183	3.11138	2.79524	3.08462	3.15929	2.73514	2.80562	2.52355	2.34775	2.14111	2.19525	2.74138	2.16364	2.25373	2.35985	2.22402	2.15271	1.91822	2.15385	1.90527	1.47142	2.15425	1.71336	1.75726	1.70254
Pxn	3.65524	3.65144	3.58431	3.62767	3.32358	3.65308	3.94096	3.7872	4.00737	2.90021	3.12471	3.38068	3.46276	3.65256	3.7585	3.79403	4.15474	3.83364	3.83141	3.76197	3.66355	3.35331	3.35585	3.41366	3.90125	3.96904	3.95401	4.15047	3.68126	4.05237	4.16549	4.06386	4.20742	3.90627	3.96735	3.54697
CG7357	3.4337	3.50535	3.49615	3.59636	3.72428	3.66876	3.40873	3.39615	3.38007	3.81826	3.50904	3.53971	3.65757	3.73324	3.64709	3.69048	3.75352	3.49822	3.53265	3.73209	3.71489	3.66078	3.72148	3.79002	3.63834	3.67104	3.56431	3.60562	3.89099	3.76217	3.61889	3.53627	3.57038	3.67638	3.59587	3.72281
pita	3.61828	3.54901	3.63095	3.71968	3.76397	3.82231	3.77638	3.66856	3.67707	3.87241	3.65506	3.83039	3.79158	3.99632	3.80065	3.86946	4.16379	3.88623	3.92415	3.87484	3.86532	3.84794	3.88205	3.96715	3.63648	3.60702	3.60138	3.72626	3.88109	3.88434	3.73709	3.82516	3.73088	3.58464	3.67103	3.72914
Pbprp5	1.67618	0.319695	1.24539	2.39354	3.18864	1.95308	1.05272	0.8675	1.17184	2.72894	1.96161	2.17766	1.44297	4.80767	2.62237	2.92498	2.5743	2.26527	-0.880087	1.27024	4.10974	1.29463	0.673082	2.52789	1.44784	4.2852	2.73899	3.29708	2.94235	4.29618	2.9029	3.32959	3.9334	2.1446	3.36055	0.647574
atms	4.00056	4.09372	4.0847	4.182	4.31617	4.26323	4.01006	4.06934	4.07465	4.38974	4.11349	4.24113	4.20661	4.28545	4.17265	4.25331	4.52122	4.21977	4.27318	4.18667	4.25392	4.36341	4.32519	4.33464	4.23244	4.06699	4.10303	4.24789	4.41611	4.34851	4.15798	4.26308	4.17991	4.1449	4.23721	4.2429
Sin1	2.49146	2.5163	2.53901	2.64125	2.69295	2.65839	2.70326	2.53571	2.54441	2.63753	2.60259	2.67597	3.00268	2.92449	2.84861	2.85713	2.8563	2.84886	2.78601	2.64367	2.78108	2.97488	2.92332	2.87106	2.87677	2.92441	2.94091	2.71188	2.82268	2.86052	2.68757	2.65479	2.6521	2.86946	2.67783	2.91571
CG3800	6.88839	6.92818	6.96333	7.08586	7.27941	7.15351	7.03716	7.048	7.03047	7.37497	7.0907	7.24232	7.0865	7.10538	7.07138	7.22862	7.17353	7.25848	7.04954	7.10888	7.09073	7.19808	7.19705	7.20837	7.03602	7.05494	7.0032	7.21366	7.34823	7.28182	7.15869	7.06509	7.10185	7.13156	7.17303	7.1634
Snmp1	3.06099	2.82224	2.67858	2.90087	2.80086	2.80706	2.58144	2.55365	2.59388	2.83259	2.81648	3.01141	3.02016	3.55513	3.09142	3.26031	3.31575	3.16928	2.43482	2.71877	3.25788	2.90157	2.95039	3.19752	2.65179	3.46702	2.8023	2.88479	2.54942	3.28878	3.12681	3.04148	3.1677	2.60317	3.09062	2.62494
CG11377	3.69488	3.66391	3.66886	3.89591	3.53829	3.8501	3.65714	3.64925	3.72281	3.82289	3.8584	3.93592	3.93372	3.95817	3.77196	3.97458	4.08798	3.96842	3.69672	3.83221	3.89778	3.93666	4.08797	4.03758	3.84056	3.81402	3.84285	4.07929	4.01294	4.11483	3.98331	3.80316	3.97234	4.00426	4.11082	4.11702
CG6126	5.06224	5.06936	5.07106	5.11678	5.07903	5.08816	5.06644	5.2034	5.20613	5.25453	5.24601	5.19917	5.27252	5.13976	4.99835	5.20378	5.29102	5.2601	5.16813	5.38399	5.28962	4.95932	5.18866	5.11402	5.22552	5.20693	5.23715	5.5419	5.32921	5.41784	5.35289	5.3272	5.56451	5.29312	5.337	5.27137
AIF	3.46179	3.47105	3.58335	3.50314	3.13436	3.57036	3.42712	3.44796	3.50432	3.78569	3.7123	3.74682	3.41515	3.51969	3.54021	3.34872	3.68387	3.42264	3.26451	3.34938	3.40476	3.63421	3.90359	4.18048	3.6056	3.67333	3.63306	3.47902	3.48621	3.49801	3.42295	3.41271	3.48214	3.60063	3.80236	3.83602
CheA29a	2.67405	0.89156	0.95986	2.92464	3.36633	2.47566	1.16037	0.377771	0.260556	3.04667	2.30694	2.50424	2.28498	2.27884	2.45996	3.70676	3.34582	3.00593	-0.804286	-0.75521	1.7361	1.73231	1.54446	1.91603	2.22264	2.13356	2.07358	3.43762	3.15161	3.41699	3.22714	3.05267	2.95987	1.02432	2.99788	0.611694
Pu	5.21965	5.23482	5.24347	5.23882	5.20027	5.2199	5.46801	5.48102	5.48787	5.2576	5.32943	5.41847	5.04233	5.22011	5.22759	5.26535	5.09165	5.07411	5.1367	5.35915	5.2289	5.38533	5.27165	5.19259	5.38588	5.39174	5.37038	5.43712	5.13916	5.33329	5.67724	5.69123	5.6685	5.67049	5.85356	5.67071
CG14641	4.62233	4.45126	4.56163	4.71384	4.6387	4.70474	4.68074	4.62817	4.65237	4.89897	4.73521	4.75865	4.84173	4.79662	4.76238	4.81484	4.59164	4.83488	4.72747	4.77239	4.77098	4.85718	4.85739	4.96177	4.71455	4.70733	4.75947	4.84344	4.8994	4.84146	4.77633	4.65056	4.7598	4.67086	4.81272	4.86787
CG8112	4.26581	4.0515	4.3223	4.56058	4.57132	4.6083	4.23236	4.22055	4.03914	4.2249	4.75228	4.11749	4.31145	4.12418	4.0622	4.12506	4.31177	4.21026	4.45483	4.64717	4.76373	3.55552	3.69492	3.36838	3.92273	3.92092	3.83355	4.08182	3.98631	4.05809	4.50702	4.83759	4.65963	3.27645	3.44929	3.49162
CG4400	4.63349	4.69751	4.67425	4.70499	4.88772	4.76807	4.7805	4.80501	4.80658	4.82892	4.89901	4.85524	4.94398	5.1126	4.97331	4.99032	4.85687	5.08262	5.04279	5.00121	5.07878	5.12495	4.97451	5.05397	4.80089	4.74969	4.73702	4.78607	4.9508	4.90245	4.82642	4.95599	4.83545	4.83103	4.75642	4.80759
ecd	4.08745	4.14564	4.11632	4.17464	4.24026	4.20187	4.34664	4.29394	4.20201	4.24092	4.35359	4.40015	4.12483	4.26245	4.19482	4.35148	4.4573	4.34324	4.37727	4.24754	4.34658	4.2804	4.28899	4.31354	4.12704	4.19965	4.17667	4.30295	4.40217	4.29431	4.26549	4.23926	4.25976	4.28763	4.36872	4.3268
modSP	5.88642	5.73593	5.80662	5.47901	5.04446	5.40775	5.2976	5.31657	5.26042	5.02534	5.31501	5.46374	5.70077	5.6261	5.68896	5.34306	5.44742	5.34747	5.04961	5.19076	5.24968	5.53732	5.61562	5.49027	5.79676	5.8379	5.72512	5.56438	5.25826	5.53412	5.39452	5.38185	5.41285	5.57631	5.77177	5.63766
CG14400	4.19867	4.23785	4.30728	4.47427	5.05967	4.84396	4.83243	4.91998	4.70384	4.87687	4.59412	4.73167	4.55395	4.51713	4.43952	4.73227	4.82704	4.73522	4.66461	4.67491	4.61582	4.58964	4.7379	4.57109	4.5076	4.66945	4.47084	4.76813	5.14499	5.02096	4.93114	4.7879	4.98812	4.63914	4.85303	5.08352
x16	3.50556	3.46143	3.48842	3.60285	3.63632	3.72039	3.62445	3.69729	3.52974	3.71356	3.65074	3.71921	3.56156	3.71575	3.74528	3.53252	3.59479	3.583	3.69585	3.50526	3.81269	3.77165	3.66027	3.67428	3.69426	3.76375	3.6639	3.65929	3.86503	3.81343	3.67713	3.69376	3.76573	3.75061	3.85956	3.76666
CG10623	4.66587	4.4964	4.58202	4.84309	4.78704	4.75578	4.65701	4.54669	4.61971	4.75352	4.53209	4.46403	4.80551	4.83002	4.61796	4.92274	5.09389	4.8955	4.92708	4.82173	4.74153	4.65232	4.80892	4.87024	4.63992	4.73391	4.81297	4.8661	5.04304	4.8892	4.75053	4.71282	4.79645	4.54176	4.48497	4.6283
bbc	5.57476	5.66987	5.62106	5.72298	5.49975	5.81667	5.68982	5.8567	5.79349	5.71475	5.84251	5.90394	5.76961	5.83369	5.71633	5.79997	5.72313	5.91654	5.86166	5.86034	5.85348	5.94492	5.94167	5.96009	5.78176	5.82336	5.82212	5.83972	5.65249	5.83379	5.9751	6.00708	6.00643	6.05415	6.10951	6.08841
CG12926	3.20672	3.31717	3.35033	3.60447	3.83876	3.65299	3.44668	3.59619	3.34159	3.78096	3.39006	3.6431	3.65899	3.67114	3.70964	3.85774	3.75965	3.74537	3.85033	3.75927	3.85765	3.76664	3.73191	3.83	4.0038	3.80078	3.83523	4.08307	4.22229	4.15939	4.2022	4.14181	4.05898	4.01003	4.02146	3.8891
CG14100	3.35257	3.12394	3.31448	3.42315	3.76954	3.35806	3.342	3.28225	3.26564	3.62939	3.42336	3.57328	3.53745	3.74591	3.6155	3.793	3.71776	3.5383	3.44291	3.50488	3.64265	3.6767	3.55257	3.55105	3.4174	3.42384	3.37381	3.49099	3.5949	3.54008	3.40532	3.44902	3.22353	3.21772	3.41331	3.54078
CheB98a	2.71979	1.00143	1.39958	3.37415	4.16425	3.04992	1.62878	0.501818	0.811994	3.2167	2.53151	3.22312	2.62879	2.34069	3.0681	4.38989	3.43333	3.38989	-0.771947	-0.152642	1.93232	2.16748	1.79643	2.22267	2.17265	1.84562	2.40068	3.75214	3.56563	4.0397	3.87881	3.73459	3.43894	1.84784	3.1283	0.819214
gk	3.66566	3.69769	3.32281	3.41823	3.55157	3.36201	2.44911	2.60726	2.58189	4.147	3.14157	3.12442	3.78401	4.08686	3.5946	3.78003	3.25834	3.68934	2.88023	2.7355	2.78365	3.46383	4.15452	4.23085	3.69964	3.66013	3.72915	3.67231	3.92509	3.71063	2.958	2.87966	2.94581	3.51725	3.82873	3.7074
Rs1	3.28377	3.44312	3.54827	3.72079	3.78456	3.75619	3.64524	3.63764	3.52117	3.90351	3.76135	3.90749	3.82304	3.94302	3.7431	3.83133	4.16305	3.85472	3.76353	3.77383	3.83081	3.98619	3.91809	4.00868	3.56312	3.87439	3.60913	3.75262	3.78226	3.6852	3.67036	3.50431	3.66331	3.62784	3.8162	3.80438
CG13850	4.61338	4.53259	4.6183	4.68449	4.64328	4.82085	4.57073	4.58343	4.67764	4.78265	4.64931	4.71957	4.63845	4.618	4.55916	4.66756	4.52631	4.64457	4.56341	4.64514	4.67698	4.72432	4.72956	4.76351	4.70335	4.76961	4.65594	4.69356	4.74142	4.73755	4.70686	4.6844	4.55188	4.73494	4.70829	4.86026
CG2118	3.30998	3.21913	3.25546	3.03875	2.73086	2.99518	2.86334	3.10159	2.84687	3.21905	3.50708	3.21705	3.20569	3.19291	3.08446	3.13003	3.23867	3.16513	2.99484	3.02697	3.18261	3.38597	3.3711	3.38144	3.23189	3.22121	3.27182	3.11125	3.07335	3.14494	3.11605	2.91781	3.09499	3.35987	3.41079	3.36614
CG6672	3.59256	3.5724	3.63272	3.77864	3.66806	3.85963	3.71999	3.79799	3.69242	3.93959	3.78632	3.85413	3.6908	3.89195	3.66718	3.87628	3.87007	3.8159	3.55396	3.6198	3.77928	3.74334	3.87333	3.89359	3.55823	3.53672	3.64118	3.9643	3.85846	3.93166	3.78595	3.78574	3.85535	3.79018	3.92117	3.80387
Ir25a	0.594306	0.451533	0.217525	1.02566	0.679495	0.887515	0.293532	0.0183073	-0.120101	0.675397	0.499407	0.809962	0.907254	1.25727	1.3547	1.70568	1.27269	1.12196	0.651235	0.759615	1.05117	0.850958	0.704112	1.05373	0.767193	1.40084	0.789295	1.6407	1.0221	1.61262	1.53716	1.52269	1.41059	0.734354	1.25875	0.519986
CG12948	2.72644	2.62008	2.55435	2.65207	2.58687	2.56673	2.68394	2.73659	2.73762	2.88544	2.75833	2.83087	2.84239	2.80849	2.94697	2.86234	2.94782	2.78385	2.7474	2.86352	2.77567	3.06976	2.83389	2.97531	2.8243	2.82841	2.877	2.93543	2.94806	2.82652	2.84504	2.88556	2.88535	2.86517	3.07066	2.88243
CG3689	3.99934	3.91577	4.03625	4.11891	3.87385	4.15156	4.05196	4.04186	4.00653	4.21058	4.11528	4.13083	4.09621	4.20888	4.20363	4.28582	3.79549	4.30805	4.0747	4.1487	4.08744	4.31454	4.28817	4.33072	4.10768	4.20617	4.17997	4.26044	4.16802	4.23362	4.2567	4.22094	4.24128	4.34384	4.42916	4.38134
Uba2	4.27089	4.21811	4.3021	4.51316	4.60136	4.47336	4.32506	4.3644	4.25381	4.69524	4.48284	4.52157	4.39378	4.58182	4.46676	4.43433	4.70083	4.50344	4.42637	4.4945	4.50121	4.49016	4.47182	4.57374	4.36481	4.27522	4.32092	4.45314	4.51458	4.42776	4.32179	4.35303	4.221	4.41858	4.42829	4.47486
Cpsf100	2.82048	2.79086	2.80932	3.03175	3.01802	3.02544	2.83999	2.7609	2.77543	2.81413	2.8277	2.96091	3.10074	3.27233	3.07057	3.20258	3.06544	3.13072	2.97066	2.9979	2.97281	3.11127	3.0911	3.23665	2.9974	3.05999	2.82008	2.99389	2.97479	2.95013	2.90061	2.81008	2.92862	2.93597	2.97981	3.01831
Ance-5	6.0233	5.93169	5.85385	5.48134	5.85133	5.47829	5.63979	5.64628	5.68501	5.65942	5.3581	5.43632	6.02556	6.16083	6.11839	5.75139	5.78026	5.92947	5.41896	5.57451	5.38494	5.76543	5.82783	5.75018	6.13463	6.03654	5.87753	5.5841	5.59135	5.54459	5.55379	5.49464	5.56639	5.64243	5.84001	5.70334
CheB93b	4.26354	1.76448	2.1604	4.40292	4.68147	4.21456	2.40806	1.35657	1.1161	4.08386	3.60655	3.81642	3.28037	3.42411	3.62398	5.25887	4.34316	4.17828	-1	-1	2.96664	3.14457	2.77314	3.14741	3.33604	3.14881	3.70281	4.86744	4.61006	5.00355	4.97633	4.80148	4.18171	1.76789	4.32303	1.17543
CG7236	1.51683	1.49321	1.04647	1.79666	1.88578	1.31869	1.18747	1.10934	0.941312	1.65149	1.10621	1.21626	1.3767	1.76337	1.69951	2.15159	2.15916	1.81916	1.00124	0.892821	1.37898	1.49176	1.44104	1.43984	1.23801	1.72513	1.36912	2.10242	1.82348	2.34235	2.04363	1.88204	1.98515	1.55817	1.82204	0.966747
Ugt86Da	5.6854	5.76208	5.74577	5.82422	5.2373	5.75655	4.90994	4.99525	4.91448	4.71934	5.03074	5.11686	5.81916	6.03668	5.91697	6.03314	5.48247	5.85473	4.91174	5.03571	5.10388	4.74169	4.83055	5.00585	5.51628	5.61106	5.44996	5.8733	5.35229	5.79579	5.21955	5.20094	5.09409	4.54426	4.86875	4.83269
CG32373	1.33335	1.25708	1.47683	1.60396	1.54834	1.34272	0.925215	0.932391	0.816944	1.27185	1.06977	1.20498	1.72862	1.54024	1.45483	1.41611	1.45362	1.42179	1.09824	1.1106	1.40434	1.38121	0.996922	1.30681	1.56136	1.80891	1.26575	1.54959	1.41516	1.9178	1.40932	1.17295	0.945416	1.23872	1.22302	1.11544
CG9894	7.71832	7.74041	7.71191	7.89798	8.16728	7.95019	7.85263	7.75783	7.86409	8.10064	7.9097	8.07243	7.66136	7.8718	7.67498	7.90755	7.62655	7.93782	7.78876	7.90218	7.9119	7.8614	7.80665	7.75581	7.68314	7.68052	7.44666	7.68773	7.82408	7.75891	7.8563	7.89186	7.84891	7.72667	7.75937	7.8611
Cbs	4.92029	4.73181	4.89382	4.88641	5.09382	4.88831	4.93808	5.00214	4.91429	5.21455	5.17797	5.16709	4.87701	5.08973	4.83128	5.11903	5.35318	5.04428	5.02084	5.09785	5.22552	5.19037	5.31578	5.18078	4.52598	4.54098	4.59865	4.91644	4.98201	4.95774	4.87552	4.94053	5.01438	5.0758	5.1353	5.01171
CkIIalpha	5.9522	6.02935	5.97214	6.19119	6.14977	6.17709	5.98665	5.91912	5.97056	6.18249	5.99307	6.10306	6.13005	6.07131	6.10416	6.0912	5.76988	6.16989	5.96846	6.14909	6.09527	6.16017	6.19837	6.24195	6.21285	6.20687	6.1708	6.14238	6.18999	6.18191	6.10325	5.9868	6.01699	6.27563	6.14091	6.37459
alpha-Est8	5.34118	5.62697	5.26853	5.75399	5.25339	5.29654	6.05751	5.63373	5.81239	4.87045	4.87451	5.02193	5.31117	5.46766	5.48875	6.15782	5.84449	5.93269	5.06	5.29587	5.16745	5.21033	5.21388	5.32157	5.43769	5.5481	5.27706	5.92017	5.52409	5.70848	5.63123	5.4907	5.51753	5.4935	5.75172	5.53898
CG10565	5.71268	5.81569	5.82647	5.95435	6.06072	6.04589	5.98832	5.99773	5.92359	6.10859	6.05521	6.12697	5.88465	5.85727	5.88233	5.90292	6.13331	5.95752	5.98869	5.85228	5.89752	6.02688	5.95417	6.00818	5.73904	5.82457	5.75624	5.7981	6.00554	5.90523	5.79613	5.84755	5.7028	5.81866	5.78304	5.79507
CG17124	6.37923	6.14236	6.31222	6.13313	6.18161	6.09731	5.87275	5.69586	5.96104	6.71048	6.22411	6.4324	6.37468	6.41372	6.34012	6.04972	5.7614	6.17795	6.09236	6.19235	6.09408	6.49608	6.40532	6.34113	6.40384	6.40487	6.38114	6.18058	6.25975	6.30371	6.02857	5.91012	6.10503	6.67386	6.65845	6.77487
CG33296	2.66225	2.79703	2.93205	3.35462	2.93898	3.44235	3.34596	3.13969	3.27471	2.12082	2.12404	2.69542	3.65807	3.09499	3.55721	3.60248	2.95272	3.85011	4.14746	4.21221	4.04373	3.54043	3.55954	3.5577	3.22333	3.42005	2.93769	3.19967	3.10202	3.39711	3.47192	3.23261	3.9201	3.0766	2.91232	3.08337
OstStt3	5.24708	5.20235	5.29386	5.52061	5.35051	5.60957	5.39609	5.49475	5.41731	5.62411	5.52988	5.50737	5.40071	5.55866	5.35533	5.55258	5.4439	5.56345	5.32671	5.4404	5.41339	5.28796	5.48302	5.58046	5.42731	5.44654	5.42193	5.58598	5.5572	5.71249	5.42426	5.44897	5.46599	5.406	5.49793	5.47926
l(2)37Bb	4.73849	4.83637	4.82322	4.86418	5.06666	5.04183	4.99023	4.95249	4.98216	4.93309	4.83961	4.97361	4.74514	4.98544	4.75334	4.97917	4.81015	4.93214	4.89557	4.81133	5.00074	4.93879	4.87624	4.94328	4.77146	4.85035	4.76627	4.90303	5.01896	4.95768	4.69238	4.89165	4.69919	4.82389	4.92096	4.92029
Mfe2	5.97247	6.03353	5.96292	5.93361	5.72517	5.93339	6.0203	6.11416	6.05886	6.32498	6.18877	6.15054	6.00531	6.25366	5.92523	6.02215	5.9711	6.0647	5.92036	6.0697	5.99322	5.86044	6.1044	6.15451	5.98689	6.03097	6.09344	6.1594	6.07728	6.12012	6.13494	6.28322	6.32843	6.1308	6.37305	6.11053
CG32271	2.81084	1.58018	1.01991	3.37241	3.38621	2.57514	1.39981	0.950547	1.45095	3.03635	2.40018	2.76649	2.24606	2.51044	2.93171	3.93785	3.38972	2.76497	-0.595912	-0.133808	2.12089	1.68764	1.37484	2.05272	2.13504	2.14739	1.73399	3.35778	3.05005	3.57476	3.39876	3.52855	3.01328	1.2229	3.14244	1.07569
cold	4.27083	4.20081	4.18624	4.63674	4.83468	4.60901	4.27424	4.45204	4.39374	4.86918	4.38967	4.55828	4.51486	4.48802	4.53876	4.81092	4.34	4.64639	4.24013	4.34539	4.52476	4.65422	4.48174	4.40462	4.4229	4.42285	4.38906	4.7074	4.96133	4.94867	4.76894	4.54326	4.51678	4.55666	4.62992	4.71938
trp	-0.778374	-0.76049	-0.720803	-0.687565	-0.654714	-0.676807	-0.773849	-0.739079	-0.834607	-0.694757	-0.730362	-0.750964	-0.791559	-0.849718	-0.939312	-0.890292	-0.794438	-0.792398	-0.88353	-0.900582	-0.872404	-0.810957	-0.711125	-0.839674	-0.815389	-0.761018	-0.617853	-0.502508	-0.792292	-0.676829	-0.778285	-0.716619	-0.647204	-0.728518	-0.668936	-0.609996
Mal-A4	1.76292	1.42144	1.55835	2.29592	1.73461	3.66926	2.22051	2.61625	1.70092	4.61494	3.69207	3.36352	2.65148	3.71964	-0.79778	-0.254628	-0.240635	0.434845	-0.209935	0.375354	-0.0505816	0.0328489	0.775919	3.39067	2.31539	0.777476	2.12536	3.06918	4.02912	4.00554	2.34816	1.80318	2.3905	3.78218	3.31109	2.13458
CanB2	6.08629	6.00744	5.98988	6.18854	6.18831	6.13898	6.1065	6.11397	6.05348	6.17108	6.06414	6.15459	6.08411	6.10788	6.04447	6.24558	6.15444	6.19658	6.02938	6.10509	6.06028	6.09805	6.02829	6.03526	6.0264	6.13548	6.05281	6.19131	6.11663	6.29874	6.24207	6.15138	6.10846	6.14313	6.07751	6.16912
alien	3.86381	3.95831	4.10294	4.23385	4.34166	4.27006	3.98996	4.04569	3.99214	4.38739	4.13418	4.18947	3.9356	4.0086	3.85878	4.132	3.96875	4.17371	3.97146	4.01045	4.04955	4.06098	4.0749	4.12359	4.10932	4.10424	4.06348	4.14181	4.43145	4.35305	4.15322	4.1275	4.12801	4.16768	4.07332	4.33048
CheB93a	4.56856	2.33488	2.30381	4.57355	5.1014	4.26075	2.83843	1.50204	2.06729	4.52398	4.00327	4.34771	3.7075	3.43442	4.00154	5.29645	4.73448	4.12077	-0.820214	-0.846052	3.26302	3.42782	3.2854	3.59118	3.70615	3.35111	3.68708	5.01557	4.71171	4.85478	5.00597	4.97326	4.27622	1.71099	4.41475	1.46781
CG14135	2.82118	2.99265	2.98804	3.1137	3.62273	3.37853	2.81213	3.0609	2.93592	3.34992	3.00513	2.8973	3.20934	3.17605	3.10857	3.22483	3.04338	3.15942	3.02405	2.9731	3.05858	3.12526	3.15473	3.12132	3.08054	3.21932	3.01938	3.0648	3.52779	3.3349	3.25676	2.94373	3.18031	3.1033	3.02875	3.28551
CG1806	3.07689	3.07348	3.00841	3.35747	3.25873	3.22282	3.12008	3.23334	3.06259	3.28334	3.4092	3.46135	3.29921	3.36328	3.31398	3.49698	3.2921	3.39287	3.36974	3.58198	3.49043	3.45139	3.28176	3.38704	3.1496	2.95278	3.08667	3.34715	3.30672	3.4868	3.56958	3.62392	3.40807	3.10008	3.34932	3.34615
CG15706	3.5004	3.51255	3.51379	3.68796	3.70474	3.67147	3.65281	3.62928	3.70469	3.7072	3.59051	3.59608	3.43965	3.4143	3.36649	3.48824	3.32093	3.53233	3.39027	3.53102	3.42174	3.54888	3.54239	3.57079	3.45465	3.56523	3.5484	3.6378	3.70454	3.79815	3.55866	3.50573	3.55589	3.62563	3.5778	3.68226
CR43670	1.52475	1.13233	1.28048	1.20893	0.869092	1.11288	1.21681	1.21968	1.38066	1.37161	1.23406	1.38109	1.96582	1.96589	1.95056	1.93788	1.47594	1.93094	2.06805	1.68135	1.81091	2.07849	2.06295	2.08341	1.92666	1.78586	2.01946	1.89268	1.72598	1.87376	1.69949	1.6909	1.82986	1.98003	2.0811	2.00333
CG10326	4.78537	4.72458	4.69647	5.02668	5.09536	5.02497	4.76633	4.7338	4.81322	5.09253	4.80652	4.86767	4.72158	4.84003	4.74383	4.94624	4.56026	4.81614	4.63457	4.74973	4.77647	4.87013	4.94586	5.12902	4.7956	4.89801	4.8255	4.97179	5.02796	4.9362	4.87519	4.73243	4.83563	4.88236	4.73149	4.97649
CG43117	1.00778	1.01538	0.511078	1.34203	1.4622	1.14632	0.97864	0.876657	0.579865	1.68171	0.909019	0.956071	0.889708	1.03834	1.45823	1.49385	-0.0963201	1.94591	1.30285	1.83192	1.82781	1.72358	1.70496	1.48942	1.42675	1.04594	1.10814	1.24685	1.48829	1.58118	1.34924	1.11026	1.8563	1.41491	1.34142	1.79023
CG1550	3.93926	3.90174	4.02947	4.06875	4.39631	4.18272	4.07665	3.9353	3.95841	4.40379	4.1764	4.28444	4.1238	4.18942	4.17747	4.17282	3.95346	4.20217	4.03027	4.0185	4.08882	4.07572	4.20656	4.11473	4.00738	3.98231	3.99243	4.12186	4.3816	4.25176	4.01872	4.0797	4.05217	4.08002	4.16201	4.11236
CG5721	4.19954	4.20546	4.2061	4.45488	4.43558	4.45889	4.29356	4.37341	4.35903	4.65341	4.32761	4.51801	4.25483	4.30853	4.24975	4.37172	4.45646	4.28778	4.15056	4.2778	4.35298	4.25375	4.41248	4.51351	4.21666	4.26358	4.3169	4.48588	4.67289	4.53694	4.33768	4.31833	4.34605	4.22208	4.41279	4.5008
CG17931	2.5643	2.51844	2.3821	2.48181	2.69845	2.32598	2.53978	2.48508	2.40071	2.26154	2.01359	2.1295	2.4688	2.50713	2.69474	2.69451	1.93159	2.85896	2.63078	2.3753	2.44986	2.40598	2.73627	2.46206	2.49263	2.8285	2.56626	2.67289	2.60634	2.66198	2.70848	2.49385	2.59682	2.55088	2.48499	2.60513
Cyp12b2	6.76486	6.78004	6.74679	6.99326	7.00548	6.86829	6.84152	6.76459	6.82368	6.63298	6.58335	6.72137	6.70715	6.69425	6.68026	6.80799	6.56758	6.827	6.69754	6.74748	6.73273	6.63061	6.48669	6.52386	6.69813	6.70668	6.63899	6.73344	6.84729	6.87923	6.85403	6.76532	6.70673	6.70176	6.67673	6.77203
alpha-Est7	7.5917	7.48218	7.53043	7.72341	7.85679	7.63678	7.74783	7.65551	7.7014	7.52828	7.31762	7.38553	7.89211	7.83519	7.70787	7.89033	7.8796	7.99152	7.74023	7.8723	7.79351	7.504	7.58962	7.49065	7.75048	7.66404	7.72342	7.89285	8.06422	7.97769	7.83796	7.81843	7.9683	7.5148	7.634	7.61013
CG17111	4.77696	4.72623	4.8426	5.06999	4.75113	4.96299	5.03065	5.0234	5.11726	4.74887	4.80987	4.98064	4.82746	5.00873	4.90378	5.07698	5.22128	5.03258	4.97638	5.06316	5.07229	4.81828	4.74674	4.74487	4.53181	4.63141	4.46984	5.01683	4.76458	5.02293	5.06691	5.11258	4.9385	4.70589	4.94751	4.80132
CG5439	3.53919	3.53874	3.47824	3.71475	3.7708	3.68716	3.41733	3.57703	3.51595	3.86175	3.4596	3.72367	3.63988	3.85127	3.77029	3.69004	3.69987	3.67009	3.59129	3.65569	3.65471	3.88984	3.74163	3.76852	3.69768	3.6299	3.57721	3.78278	3.96244	3.87648	3.61169	3.69011	3.63781	3.59285	3.67337	3.65775
CG11964	4.03229	4.06244	4.02057	4.20713	4.3958	4.18052	4.14728	4.18737	4.21478	4.4248	4.25871	4.40139	4.09405	4.0911	4.03922	4.17029	4.46375	4.21174	4.15887	4.10813	4.13837	4.2641	4.17174	4.2042	4.07383	4.05883	4.04214	4.13618	4.36354	4.26122	4.17676	4.25002	4.05752	4.16997	4.22621	4.15023
nes	5.27062	5.29263	5.41236	5.1231	4.79733	5.21393	4.95209	5.02442	4.97574	4.71058	5.0017	4.90371	5.31681	5.29194	5.20073	5.00848	4.91583	5.05786	4.91134	4.99379	4.95916	4.92425	4.92199	4.98054	5.22272	5.27347	5.22417	5.05661	4.87998	5.01226	5.12639	5.00431	5.01421	4.82551	4.80511	4.98074
CG32850	4.16506	4.11365	4.24311	4.36187	4.32188	4.37145	4.0884	4.15871	4.22656	4.35867	4.08876	4.19052	4.14707	3.96248	4.02275	4.18895	3.6161	4.20851	3.96897	4.12913	4.14003	4.19677	4.28264	4.20017	4.20137	4.21767	4.18361	4.19268	4.19965	4.31272	4.31154	4.13033	4.28632	4.32703	4.45758	4.48323
CG32581	4.69091	4.74689	4.73994	4.93789	5.11207	4.91983	4.70856	4.74132	4.69255	5.03911	4.7952	4.85565	4.91179	4.87366	4.73205	4.94833	4.19782	5.00043	4.7866	4.88674	4.92492	4.89374	4.9596	5.03223	4.71016	4.75108	4.70062	4.85823	5.0412	5.04738	4.92038	4.76117	4.78952	4.88709	4.81114	4.98788
CG15098	9.32342	9.3889	9.46996	9.61112	9.79487	9.75364	9.42594	9.4641	9.39069	9.62656	9.33497	9.51117	9.64887	9.81862	9.6367	9.84382	8.98757	9.77882	9.63908	9.77916	9.76107	9.66652	9.79678	9.70243	9.48253	9.51368	9.41409	9.65485	9.72652	9.72898	9.60951	9.55698	9.56941	9.47901	9.50672	9.58011
CG13082	3.25775	3.30471	3.20325	3.242	3.82835	3.14212	3.64544	3.52322	3.6561	3.15974	2.69945	2.80488	3.20216	3.37428	3.48411	3.72853	3.22997	3.4918	3.57282	3.9968	3.92367	2.9175	2.58201	2.48332	2.6335	2.95106	2.53887	2.94142	2.67403	2.93978	3.24012	3.35876	3.14665	1.96012	2.43254	2.09624
CG7470	7.49391	7.53103	7.57348	7.36572	7.34673	7.33184	7.46024	7.31447	7.50552	7.18215	7.27768	7.44287	7.42003	7.4102	7.33588	7.24442	7.64014	7.36626	7.20654	7.36575	7.33543	7.38198	7.41521	7.40557	7.41389	7.2283	7.45438	7.22875	7.33132	7.27473	7.25246	7.38065	7.37426	7.51175	7.50446	7.42556
Ggt-1	4.65619	4.75674	4.69508	4.7203	4.42417	4.59793	4.83347	4.86819	4.91521	4.68936	4.81074	4.76977	4.60668	4.95527	4.77901	4.64805	4.48697	4.48503	4.51158	4.57623	4.45179	4.4765	4.55146	4.50901	4.59344	4.62989	4.57994	4.61551	4.35864	4.61118	4.74335	4.88328	4.79794	4.28667	4.60119	4.31102
amd	0.518704	0.447933	0.440048	1.1763	1.21704	0.908991	0.855044	0.575106	0.607331	0.810509	0.57753	0.39106	0.971931	1.2741	1.33402	1.76249	1.70074	1.14471	0.833376	1.02579	1.37809	0.937742	0.812386	0.769419	0.759359	1.10315	0.8325	1.21854	1.18847	1.20513	1.3458	1.34942	1.17227	0.892805	0.889266	0.72717
pncr013:4	2.89974	2.9248	2.96136	3.13834	3.20776	3.11692	3.01279	3.02339	2.99344	3.28794	3.15567	2.99104	3.39387	3.0431	3.28802	3.39909	2.59482	3.35568	3.05212	3.12182	3.22384	3.22622	3.28033	3.2366	3.25642	3.21873	3.22802	3.21475	3.25972	3.30179	3.35335	3.15629	3.27338	3.26626	3.30201	3.48163
CG40160	4.01844	3.96699	4.05444	4.28669	4.28455	4.22274	4.02838	4.0044	4.05606	4.28402	4.02852	4.13077	3.92353	4.02741	3.86434	4.01115	4.02522	3.98808	3.76655	3.85932	3.77958	3.97482	3.98537	3.85045	4.01285	3.75584	3.85933	3.97026	3.99948	3.95491	4.11254	4.06518	3.93813	4.02895	3.93353	3.91801
CG4406	4.28998	4.30464	4.44064	4.58224	4.74661	4.73598	4.43475	4.4726	4.66591	4.88884	4.52435	4.6668	4.37051	4.46757	4.39511	4.53466	4.53976	4.5446	4.39838	4.40979	4.53997	4.54769	4.53704	4.54539	4.31092	4.21314	4.23479	4.44071	4.64142	4.59782	4.35928	4.36186	4.31009	4.33179	4.47771	4.51836
CG7079	5.41778	5.48038	5.33248	5.18108	5.66546	4.90395	4.54411	4.42993	4.51533	4.84574	4.49817	4.63498	5.43937	5.59058	5.59933	5.59955	5.41896	5.34003	4.34374	4.62522	4.59272	4.48094	4.40614	4.37104	5.7747	5.80394	5.76958	5.55998	5.76714	5.80819	5.27425	5.03331	4.99887	4.9378	5.09221	4.8838
bgm	5.38701	5.32575	5.57097	5.28518	5.2722	5.71019	5.0227	5.114	4.66658	4.7788	4.42338	4.53224	5.68694	5.72749	5.61741	5.04171	5.51054	5.18506	4.82516	4.42334	4.63285	4.92436	4.98553	4.59637	6.35564	6.28892	6.27263	6.06691	6.16939	6.09295	5.27181	5.22689	5.2991	5.19229	5.34354	5.45009
CG13793	2.88514	3.0069	2.83536	3.13566	2.70798	3.08934	3.10142	2.69013	3.22201	1.81863	1.624	2.36293	2.75809	2.94525	2.81038	2.82767	2.27608	3.09368	2.53829	3.03073	2.72052	2.18754	2.47913	2.48614	3.21637	3.23187	2.85031	3.23547	3.00708	3.18645	3.16441	3.3199	3.2221	2.57417	2.80933	2.8109
CG33129	4.61458	4.60792	4.58821	4.73272	4.75289	4.70031	4.64144	4.80864	4.71333	5.02884	4.86914	4.7799	4.48736	4.54824	4.39273	4.73348	4.78074	4.73467	4.49851	4.55631	4.49621	4.56846	4.62291	4.92677	4.63825	4.63479	4.64769	4.85341	4.89257	4.93792	4.79679	4.7121	4.84461	4.70101	4.83268	4.84247
CG9628	7.54679	7.55847	7.6183	7.85959	8.00489	7.83396	7.72027	7.79978	7.66938	7.64659	7.33118	7.58635	7.71663	7.78255	7.78761	8.02317	7.47012	7.93061	7.70612	7.8482	7.85857	7.69376	7.63851	7.53334	7.71453	7.73942	7.62402	7.9388	7.95535	8.10269	7.98075	7.84897	7.87023	7.66002	7.66649	7.71391
CG6674	3.24635	3.34742	3.18701	3.49254	3.87459	3.51521	3.40094	3.43041	3.33564	4.02484	3.32224	3.37129	3.42555	3.64472	3.15892	3.43361	3.74237	3.4878	3.30735	3.49305	3.41728	3.36888	3.60205	3.79667	3.30131	3.39169	3.43508	3.62232	3.8489	3.53873	3.41152	3.23404	3.42741	3.4285	3.47254	3.54881
CG3271	3.12025	2.95543	3.03442	3.25028	3.08985	3.11916	2.94272	3.12218	3.08333	3.13075	3.29026	3.21739	3.15369	3.35949	3.08334	3.24001	2.89579	3.13106	3.22984	3.29346	3.18178	3.29417	3.30917	3.35187	3.14622	3.12414	3.08513	3.17354	3.28763	3.38619	3.16096	3.11385	3.17929	3.27444	3.22202	3.49856
mRpL39	3.26785	3.17282	3.34292	3.42873	3.66563	3.54987	3.32343	3.19863	3.29403	4.37196	3.78256	3.92333	3.85505	3.89076	3.66108	3.8769	3.88088	3.78505	3.64241	3.66868	3.76295	3.77591	4.17069	4.13565	3.35075	3.19863	3.29945	3.18738	3.5996	3.52808	3.11338	3.22324	3.10221	3.45471	3.5466	3.59971
cni	5.95706	6.03385	6.07546	6.19708	6.45904	6.30227	6.02223	6.13126	6.02581	6.46335	6.09106	6.2549	6.13214	6.17105	6.03289	6.24263	5.46138	6.28382	6.02355	6.02144	6.04337	6.12304	6.1642	6.22878	5.89634	6.0152	5.95061	6.09734	6.30207	6.19517	6.04278	5.99182	6.03659	6.12561	6.07635	6.17016
UbcD4	5.86019	5.83744	5.82744	5.9958	6.05623	5.96658	6.05494	5.94918	5.97853	6.26385	5.81093	6.03519	5.8293	5.9163	5.77519	5.97197	6.03499	6.02016	5.85319	5.86904	5.90541	5.93081	5.96626	6.01108	5.72769	5.79444	5.73175	5.89628	6.14471	5.96284	5.7792	5.86757	5.80927	5.90269	5.83469	5.943
Srp68	4.58823	4.57836	4.68082	4.79326	4.59639	4.8511	4.73798	4.73829	4.66294	4.9215	4.90637	4.90026	4.54463	4.86145	4.49584	4.72104	4.86386	4.7578	4.58375	4.62452	4.65625	4.63828	4.72877	4.75701	4.62607	4.69592	4.69989	4.91362	4.92643	4.9601	4.73883	4.72525	4.81074	4.69232	4.8544	4.85252
CG14265	-1	-1	-1	-0.875596	-1	-0.857378	-0.915667	-0.225163	-1	-0.647097	-0.596985	-0.581185	-0.61922	-1	-1	-0.822676	-1	-0.922898	-1	-0.703986	-1	-1	-1	-0.935006	-1	-0.83393	-1	-0.91411	-0.664115	-1	-0.943533	-1	-0.471735	-1	-0.826117	-1
CG3402	2.36721	2.56465	2.74754	2.73183	2.85842	2.90228	2.53524	2.57884	2.52582	3.13786	2.35549	2.77174	2.92819	2.56752	2.68263	2.85232	2.22713	2.65994	2.5471	2.54894	2.7336	2.70163	2.87357	2.92457	2.81571	2.83745	2.73549	2.84498	3.04111	2.97976	2.78465	2.82682	2.84593	2.96419	2.74132	2.87065
pinta	4.27825	4.25925	4.31486	4.50304	4.52085	4.72047	4.40255	4.46079	4.53586	4.71543	4.28814	4.51231	4.35612	4.48045	4.33214	4.29745	4.23519	4.47646	4.09629	4.24721	4.20904	4.25198	4.24162	4.35513	4.20087	4.32114	4.29251	4.43109	4.4856	4.46414	4.26729	4.22485	4.33563	4.41421	4.55618	4.59084
CG4065	3.30446	3.30609	3.40216	3.32219	3.34575	3.44222	3.23649	3.37935	3.37778	3.52297	3.46314	3.52213	3.19689	3.44439	3.0576	3.15987	3.29403	3.09263	3.19273	3.14326	3.22901	3.4442	3.50172	3.63186	3.22251	3.21032	3.15787	3.28238	3.29878	3.19992	3.09668	3.23679	3.13302	3.24801	3.3574	3.4131
RagA	4.49995	4.50214	4.49646	4.62609	4.64722	4.73542	4.52962	4.6713	4.50076	4.71801	4.6067	4.69956	4.46471	4.60856	4.48028	4.70024	4.48798	4.66359	4.49517	4.46174	4.55107	4.60796	4.59197	4.59506	4.45052	4.4856	4.40953	4.59461	4.63418	4.68735	4.54648	4.51466	4.50812	4.54196	4.57534	4.66004
BEAF-32	3.85886	3.72925	3.82575	4.07362	4.23018	4.10883	4.03002	3.91808	3.99486	4.04025	4.00354	4.05976	3.9609	4.08667	4.00522	4.17709	3.92073	4.00093	4.0141	3.99269	4.0722	4.07522	3.91605	3.99073	3.86439	3.82062	3.7867	4.02303	4.16296	4.10559	4.03038	4.05224	4.03814	3.87288	3.86034	3.92868
CG17282	4.38694	4.31354	4.33783	4.45576	5.12246	4.73115	4.52767	4.5138	4.43073	4.95475	4.62967	4.69522	4.34711	4.50579	4.30388	4.42736	4.37932	4.55048	4.38765	4.40733	4.37089	4.4526	4.51355	4.51368	4.3688	4.32822	4.37953	4.58026	4.89115	4.59688	4.46956	4.53	4.4247	4.49542	4.42464	4.57404
Indy	6.43996	6.52896	6.59847	6.03396	5.56884	6.01971	5.78966	5.98753	5.77745	6.23895	6.54183	6.40726	6.57074	6.51276	6.44802	6.16341	5.90938	6.15869	5.88726	5.9571	5.934	6.50622	6.76959	6.62441	6.53529	6.54435	6.5562	6.13403	5.91339	6.01312	5.96529	5.90982	6.09199	6.56325	6.65408	6.73339
Obp99d	1.79559	2.4401	2.0943	2.13997	2.65878	1.6898	0.743605	1.76831	0.925971	3.22097	2.83029	2.4752	2.22198	2.65692	2.43234	2.80951	3.55119	2.38597	1.65454	1.77016	1.68807	1.18731	1.63307	1.31262	1.57316	1.44141	1.2372	1.33457	1.70091	2.0366	1.4482	1.21855	1.19207	1.00314	1.28615	0.844893
snoRNA:Psi28S-2996	1.68426	1.60911	1.84874	2.00142	2.15471	1.61043	2.26739	2.31612	1.7134	2.62644	2.61105	1.98141	2.3024	1.12078	2.09364	1.6061	1.26177	1.82182	1.22167	1.85168	1.73165	1.80318	1.66432	2.06356	2.36747	1.6996	2.20543	1.8641	1.71876	1.79053	1.09409	1.5927	1.54336	1.35211	1.91792	1.87045
pck	4.21536	4.31147	4.35648	4.60681	4.40995	4.55684	4.51817	4.56813	4.53648	4.55068	4.46072	4.64429	4.31153	4.62144	4.45187	4.76732	3.98595	4.63707	4.44718	4.46058	4.45089	4.50647	4.45707	4.40145	4.27	4.30024	4.32146	4.64628	4.46428	4.7165	4.65261	4.59023	4.52205	4.38487	4.54831	4.47929
CG33303	4.31279	4.36433	4.37013	4.58435	4.87839	4.69232	4.50948	4.67642	4.51603	5.06582	4.63584	4.61735	4.34732	4.62767	4.35614	4.6695	4.14496	4.62766	4.35711	4.46628	4.3909	4.43834	4.59145	4.68643	4.463	4.40711	4.48759	4.71928	4.81096	4.78847	4.54227	4.45738	4.59175	4.51589	4.58323	4.60729
CG10602	4.82808	4.8858	4.90528	5.14303	5.3878	5.19596	4.99231	5.00913	5.03538	5.48562	5.00941	5.13366	5.09687	5.16103	5.03086	5.19965	5.10939	5.1729	4.9282	5.09176	4.99988	5.02574	5.15913	5.26136	4.95126	4.95806	4.90387	5.28838	5.3612	5.27599	5.10255	5.01356	5.07114	4.99841	5.14941	5.13015
Hex-C	5.99423	5.7013	5.93786	5.91575	6.25555	5.91049	5.41075	5.82382	5.67227	6.76372	6.4817	6.31963	6.09654	5.95639	5.66926	5.73036	6.07488	6.12142	5.65348	5.91614	5.86755	5.92485	6.25349	6.04872	5.63121	5.60728	5.8594	5.70556	6.21271	5.74751	5.77441	5.66885	6.02663	5.97711	6.15658	6.21277
CG31522	6.97896	7.03514	6.93466	6.67796	6.04778	6.81958	6.47289	6.19376	6.36972	5.87262	6.2439	6.40611	6.96019	7.0301	7.0324	6.82522	6.45901	6.8032	6.2338	6.32501	6.22496	6.57882	6.39117	6.38914	7.0237	6.91662	6.98714	6.59573	5.95821	6.505	6.16898	6.26016	6.14477	6.47075	6.40945	6.50997
IntS11	3.9127	4.04331	4.04102	4.21355	4.42351	4.26923	4.02868	4.1025	4.09403	4.56194	4.15364	4.28722	4.01129	4.14305	4.1536	4.18332	4.28754	4.20811	4.07619	4.10891	4.1548	4.09314	4.16984	4.07478	4.04325	3.98263	3.97953	4.14915	4.30517	4.26768	4.13811	4.07568	4.12919	4.05896	4.08457	4.12968
endos	5.4053	5.45565	5.51013	5.64296	5.78196	5.73095	5.59749	5.61212	5.59336	6.04774	5.63248	5.68854	5.3195	5.46535	5.27701	5.47194	5.09642	5.45663	5.36687	5.36494	5.45851	5.42059	5.61419	5.82697	5.28644	5.30253	5.20002	5.42658	5.61075	5.4898	5.43864	5.40211	5.42091	5.38279	5.42904	5.50105
hay	2.84871	2.72092	2.87701	2.93333	2.88089	3.02444	2.78093	2.76311	2.71372	2.86281	2.9476	2.90273	2.8244	2.91068	2.87121	2.91868	2.73661	2.98504	2.81991	2.85955	2.79437	2.93349	3.02421	3.09637	2.93798	2.9145	2.93951	3.09117	3.02894	3.03133	3.00607	2.99458	2.92738	3.00768	2.94507	3.14444
CG42764	1.22827	0.939934	0.83263	1.22678	1.50692	1.84404	1.09016	0.868559	0.848617	1.6581	1.13966	1.27187	1.21185	0.932604	0.907424	0.598184	0.946225	1.15907	1.16361	0.982987	1.31624	1.06174	1.54862	2.20308	1.55737	1.70855	1.60748	1.78944	2.24987	2.0252	1.8366	1.67712	1.60145	1.82503	1.80605	1.66404
CG17121	4.88918	4.81619	5.01664	5.11422	5.19695	5.21016	5.06016	4.96805	5.09771	5.34011	4.97004	5.25896	4.98952	5.08776	5.07302	5.09177	5.2042	5.14488	5.03572	5.11752	5.09995	5.20556	5.17228	5.0602	4.86436	4.89157	4.85595	5.06618	5.23788	5.1975	5.08174	5.06828	5.06138	4.9773	5.19643	5.11341
ste24a	4.41875	4.45823	4.54876	4.77274	4.98269	4.8838	4.53689	4.67127	4.40068	5.19157	4.66132	4.76709	4.37024	4.49042	4.38013	4.5474	4.47858	4.55659	4.41915	4.52648	4.49762	4.56653	4.8198	4.86789	4.37533	4.4427	4.32501	4.56688	4.86648	4.75962	4.5506	4.45819	4.54151	4.53558	4.57114	4.56965
lectin-33A	2.42998	2.31455	2.26126	3.43485	3.8009	3.22663	3.13311	3.3041	3.01661	2.67039	1.85049	2.59718	3.1908	3.23933	3.73839	3.75397	3.60186	3.77318	3.71826	3.78931	3.62905	2.6916	2.99464	3.08835	2.53979	2.4973	2.53744	2.94083	2.95039	2.8804	2.91165	2.50145	2.74797	1.72166	2.25409	2.52822
Rbsn-5	2.77793	2.79953	2.78012	3.03014	3.22899	3.17154	2.96292	3.00296	2.98249	3.36233	2.99479	3.10399	3.01744	3.10129	3.0181	3.06988	2.9975	3.0864	2.96479	3.10595	3.03744	3.1786	3.19825	3.35323	2.824	2.87208	2.89626	2.99007	3.12867	3.00638	2.85794	2.83863	2.84805	3.02738	2.93036	3.0457
TotX	8.13707	6.6415	7.53723	6.92451	7.12449	7.05325	7.16953	7.61405	7.21857	6.40536	6.87227	6.674	7.64946	7.40155	8.13802	7.51125	6.55124	7.67579	7.29032	7.105	6.9764	6.10838	6.35447	5.80584	7.68116	7.92254	7.77482	7.68978	8.20033	7.9375	7.29968	6.8687	7.94801	6.82528	6.7345	6.98481
l(1)G0320	6.31777	6.45488	6.43135	6.65389	6.45294	6.7272	6.76745	6.81997	6.74647	6.79451	6.7928	6.77427	6.37739	6.5749	6.40459	6.62208	6.55864	6.66076	6.57392	6.5496	6.56151	6.55551	6.561	6.61942	6.4739	6.53027	6.52321	6.72004	6.68687	6.81824	6.58138	6.65415	6.65432	6.72402	6.71029	6.69896
Vha16-1	9.06093	9.0807	9.08403	9.07577	8.76304	9.09853	8.94448	8.99855	8.92815	9.03339	9.14183	9.10708	9.08431	9.06733	9.12729	9.10838	8.75909	9.14929	9.04682	9.08148	9.07946	9.10992	9.10836	9.14866	9.14931	9.16963	9.14014	9.05367	8.94298	9.08694	9.09063	9.09058	9.09857	9.10201	9.06048	9.1307
CG4288	2.84641	3.18502	3.09556	2.71817	2.90853	3.17274	3.66642	3.47894	3.69064	2.86535	2.48265	2.80088	2.89907	2.91937	2.88036	2.82397	2.81076	2.83029	3.1663	3.04828	3.31033	2.9347	3.00249	2.85732	2.90287	3.21854	3.00324	2.85598	3.14566	3.02597	3.27542	3.27539	3.4852	2.84753	2.81729	2.88239
Cyp309a2	3.85772	3.90212	4.08221	4.107	4.11533	3.93587	4.11729	4.22997	4.02804	4.30252	4.31956	4.1782	3.54258	3.58929	3.27592	3.95207	3.72777	4.06196	3.60336	3.97398	3.97001	3.90853	4.17219	3.96466	3.58542	3.45176	3.49224	3.72926	3.74124	3.68484	4.08808	4.26801	4.06831	4.29325	4.64324	4.48859
yellow-c	6.51405	6.46739	6.44779	6.82251	7.02783	6.42366	6.76773	6.89791	7.01134	6.75171	6.6668	6.59617	6.0594	6.28192	6.24405	6.89433	6.50749	6.48872	6.36538	6.66469	6.49608	6.07182	6.10754	6.02656	5.9599	6.07741	5.84176	6.60033	6.59767	6.72303	6.93695	6.87516	6.70052	6.12231	6.53618	6.17247
CG7718	2.97775	3.04445	3.18196	3.06684	3.0967	3.22967	3.14029	3.10758	3.03103	3.4166	3.28725	3.19143	2.8654	2.84374	2.86271	2.8897	2.82664	2.75438	2.99247	2.87258	2.84988	2.93859	3.08871	3.63438	3.49692	3.69407	4.00218	3.53589	3.30115	4.042	3.55028	2.94317	3.85838	3.47516	3.54587	3.59745
Tsp42Ea	1.48809	1.39388	1.42446	1.68465	2.56201	1.11264	1.08425	0.900683	0.984522	1.81525	1.32979	1.53486	0.802708	1.91906	1.81616	1.81448	2.92749	1.71118	1.28765	0.87534	1.05143	0.862036	1.2253	0.98607	0.845316	1.3892	1.1662	1.36777	1.72912	1.57851	1.44071	1.19222	1.30856	1.31665	1.38937	0.798935
CG3714	6.35536	6.35964	6.34031	6.33872	5.85453	6.29172	6.19508	6.21687	6.25089	5.50815	5.86097	5.93282	6.1839	6.2237	6.20155	6.1918	6.15296	6.12886	6.05238	6.03653	6.0648	5.87681	5.74775	5.74141	6.32974	6.39101	6.32855	6.19496	5.7501	6.11173	6.18287	6.18794	6.05774	5.90956	5.90131	5.95332
Klc	5.40982	5.42513	5.45517	5.54035	5.42631	5.53156	5.47002	5.53243	5.53364	5.52312	5.51521	5.59882	5.48215	5.5305	5.52194	5.56065	5.65348	5.55241	5.49073	5.54175	5.59382	5.58081	5.54698	5.53283	5.40551	5.39725	5.37795	5.47935	5.45297	5.51868	5.54617	5.46583	5.46492	5.42712	5.4841	5.5202
CG2685	2.91056	2.78813	2.77667	2.87571	3.0647	2.85175	2.88558	2.82541	2.81604	3.02786	2.93966	2.95302	3.0134	3.0783	2.86834	2.92274	3.21434	2.96695	2.84783	2.87677	2.80402	3.04077	2.93493	3.05931	2.74554	2.77148	2.64127	2.87175	3.06075	2.85394	2.71311	2.73229	2.67274	2.91478	2.76864	2.84999
GRHR	4.65122	4.6127	4.77013	5.16791	5.16698	5.20736	5.20251	4.92161	5.23578	5.14845	4.8609	4.75714	5.07973	5.19806	4.93595	5.24355	4.97266	5.35838	5.06671	5.17449	5.12629	5.01351	5.12459	5.06135	4.6009	4.50455	4.67099	5.09277	5.24933	5.16268	4.64529	4.72558	4.97652	4.99749	5.01446	5.00828
CG6153	3.29273	3.556	3.38495	3.69502	4.41073	3.9269	3.48114	3.82208	3.71474	4.52138	3.65188	3.838	3.63925	3.6637	3.54113	3.77897	3.70733	3.57656	3.42155	3.52947	3.51401	3.60614	3.91623	4.0145	3.3298	3.49424	3.49197	3.84046	4.01101	3.81238	3.48818	3.43956	3.34981	3.55733	3.61224	3.68803
CG8121	3.80588	3.84103	3.75679	4.14069	3.99559	4.04452	3.90925	3.97109	3.87635	3.97698	3.85872	4.02018	3.84368	3.99738	3.94374	4.26874	3.3455	4.05552	3.6751	3.91822	3.89091	3.93196	3.95138	3.87045	3.78867	3.7938	3.74687	4.09301	3.97662	4.14152	4.05036	3.96595	3.95334	3.89773	3.99263	4.0654
CG8578	4.52011	4.42511	4.53478	4.54474	4.40938	4.61761	4.50256	4.5235	4.49033	4.62706	4.52761	4.69965	4.3629	4.49932	4.47035	4.4964	4.72816	4.60463	4.56103	4.44987	4.51825	4.57046	4.44214	4.4881	4.40464	4.37486	4.40271	4.48704	4.49822	4.39632	4.55115	4.521	4.46385	4.46666	4.51863	4.56763
aralar1	6.42586	6.40538	6.48698	5.85921	5.40997	5.90546	5.65466	5.82066	5.84107	5.56749	6.03395	6.0617	6.27486	6.28815	6.14214	5.72187	5.63011	5.62353	5.88086	5.9665	5.85782	5.47191	5.59516	5.45034	6.35454	6.30989	6.35615	5.83987	5.50918	5.83826	6.02317	6.05032	6.04355	5.70737	5.75742	5.62577
Hpr1	3.23392	3.2159	3.34034	3.37309	3.27111	3.46883	3.25164	3.22272	3.20098	3.42842	3.37048	3.53816	3.29066	3.43393	3.2997	3.28518	3.59531	3.30366	3.28688	3.25181	3.31753	3.3238	3.4603	3.55838	3.17042	3.32931	3.18343	3.28293	3.30618	3.29781	3.20432	3.24633	3.17992	3.14037	3.36284	3.46569
CG4802	4.61773	4.75324	4.63884	4.80882	5.04015	4.79461	4.72512	4.92835	4.88682	5.32897	4.89221	4.8055	4.81369	4.55887	4.60624	4.63294	4.68892	4.7777	4.77604	4.89035	4.85632	4.6632	4.81684	4.83844	4.71762	4.54739	4.79933	4.85527	5.111	4.92028	4.82388	4.8456	4.94698	4.93143	4.90544	4.97141
ball	1.28632	1.38974	1.52195	1.81026	1.68114	1.88148	1.57204	1.48077	1.70527	2.43839	1.85012	1.77823	1.56841	1.66135	1.48096	1.83663	2.03792	1.70269	1.42181	1.61844	1.59897	1.48453	1.99406	2.7817	1.63461	1.27407	1.63542	1.7991	2.12407	1.66611	1.51928	1.55186	1.65831	1.62293	1.55718	1.75729
Snx16	2.97135	2.9741	3.00824	3.1457	3.21287	3.12651	2.99442	3.2266	3.04154	3.12476	3.13953	3.30434	3.13749	3.27891	3.18455	3.2771	3.16369	3.25287	3.23483	3.11097	3.0635	3.16013	3.16018	3.19318	3.09295	3.13054	2.98127	3.24746	3.22462	3.29925	3.13481	3.07482	3.13062	3.19298	3.14855	3.31837
CG6839	6.84619	6.65417	6.65269	7.55525	8.59918	7.50846	7.72242	7.56062	7.62301	7.39869	6.80599	7.08528	7.21563	7.22794	7.2444	7.54839	7.60069	7.2783	7.56945	7.61319	7.7471	7.15379	7.15902	7.11627	7.04188	7.07485	7.07562	7.0318	7.82107	7.54033	6.97982	7.20249	7.10642	6.57296	6.43091	6.84497
rost	4.3758	4.42348	4.39833	3.83352	3.5368	4.04987	3.79742	3.93577	3.84841	3.96522	4.30908	4.22699	4.22806	4.11731	4.44592	3.62353	3.30204	3.73733	3.58279	3.83962	3.78611	4.4446	4.38109	4.39799	5.05733	4.70369	4.56385	4.17344	3.81103	4.10591	4.04378	3.98427	4.07773	4.62196	4.56976	4.63626
CG12104	3.20351	3.35287	3.39895	3.47519	3.32381	3.52643	3.62202	3.63074	3.60649	3.65215	3.53088	3.62435	3.21179	3.2391	3.09573	3.37315	3.1272	3.40965	3.00708	3.19387	3.29606	3.13009	3.56356	3.82465	3.13204	3.19984	3.33354	3.40349	3.4131	3.39352	3.29096	3.48947	3.29112	3.434	3.51044	3.58281
CG9911	5.32024	5.35545	5.38931	5.51907	5.73918	5.65543	5.40641	5.52079	5.44876	5.87931	5.3958	5.54827	5.2826	5.39701	5.26759	5.40447	5.23049	5.38381	5.18695	5.3433	5.32152	5.2821	5.35212	5.34569	5.32416	5.37603	5.33233	5.58487	5.65197	5.66078	5.4976	5.47741	5.46102	5.43844	5.42824	5.51724
scaf6	3.67435	3.72149	3.59175	3.70202	3.63617	3.70857	3.63567	3.70883	3.65946	3.79882	3.91549	3.78874	3.7123	3.77378	3.78615	3.73253	3.7547	3.73579	3.61965	3.6832	3.67588	3.91714	3.72757	3.87051	3.64991	3.62422	3.69063	3.77137	3.62197	3.67437	3.6853	3.65921	3.68583	3.82788	3.81808	3.79061
aph-1	3.86957	3.90106	3.90007	4.04372	4.36944	4.34914	4.06348	4.19909	4.03494	4.2385	4.14779	4.12148	3.79713	4.03309	3.89112	4.14883	3.72818	4.04431	3.9906	4.041	4.06734	3.82739	4.06358	4.08874	3.86596	3.888	3.87858	3.93378	4.05261	4.15125	4.12855	3.96566	4.05441	3.94167	3.90702	3.99442
nudC	3.36449	3.39352	3.45698	3.72446	4.0211	3.77451	3.47578	3.51959	3.38661	4.5349	3.71935	3.83338	3.3612	3.4512	3.34639	3.48979	3.56053	3.46565	3.43403	3.42214	3.49912	3.39775	3.89729	4.22358	3.35201	3.29287	3.31179	3.68422	4.06525	3.63859	3.48788	3.37142	3.40228	3.46285	3.44226	3.70834
Sac1	4.8525	4.86081	4.98061	5.03256	4.99115	5.15597	5.05473	5.01073	4.95324	5.056	5.096	5.17457	4.77815	4.80294	4.82402	4.88849	5.04069	4.82786	4.7331	4.75059	4.84546	4.87532	4.9667	5.06071	4.64674	4.64713	4.7582	4.8973	4.9494	4.92184	4.81272	4.77344	4.71332	4.8258	4.81607	4.82744
Taf6	3.37476	3.43097	3.61673	3.58465	3.70225	3.73505	3.49044	3.53209	3.54268	3.76963	3.47775	3.62615	3.49581	3.6065	3.39569	3.52374	3.31392	3.5017	3.53169	3.47677	3.53572	3.57006	3.61323	3.61072	3.22568	3.24639	3.27606	3.51433	3.66044	3.5617	3.31016	3.42614	3.3697	3.27835	3.38792	3.41363
CG13810	2.79751	2.92404	3.07672	2.93716	3.23272	3.33668	3.11723	3.23891	3.12363	2.97756	3.19535	3.20222	3.08194	3.03206	3.12776	3.08794	3.08456	3.25745	3.30629	3.23409	3.18802	3.35141	3.18975	3.15669	2.94382	2.88461	2.78765	2.96311	3.35449	3.31364	3.0717	2.96548	2.91879	3.14696	3.02549	3.1771
ns4	3.56596	3.56774	3.66044	3.65226	3.76576	3.83747	3.56939	3.6418	3.65667	4.08454	3.62149	3.83271	3.58702	3.69605	3.50756	3.58759	3.7286	3.50651	3.30528	3.538	3.5186	3.55963	3.742	3.80677	3.49911	3.49584	3.46991	3.72084	3.84872	3.73666	3.55427	3.50421	3.5731	3.52702	3.67701	3.64997
CG13024	1.5877	1.4138	1.44434	1.4258	1.34023	1.39771	1.68483	1.87298	1.9837	1.55633	1.59944	1.79688	1.74953	2.06031	1.79347	2.26224	1.70564	1.76608	1.77453	2.16708	2.03473	2.13293	2.0757	2.17314	1.44578	1.46557	1.43016	1.4941	1.45873	1.60985	1.95183	1.84266	2.03178	2.08203	2.02847	1.82328
psidin	2.82164	2.98218	2.85891	3.02299	2.69628	3.07532	2.98217	3.05087	2.98365	3.18664	3.14013	3.19404	2.81333	2.87642	2.89139	2.82663	3.15084	2.91321	2.7394	2.92174	2.84173	2.93212	3.26743	3.51984	2.84538	2.8112	2.82186	2.81573	2.85222	2.71933	2.73713	2.73047	2.70785	2.87593	2.8786	2.97015
AcCoAS	7.92573	7.95573	8.09598	7.55262	7.02927	7.59223	7.34721	7.60129	7.48127	6.72507	7.30396	7.31411	7.86936	7.70666	7.79273	7.33688	7.12829	7.31418	7.0409	7.34541	7.32587	7.24199	7.33122	7.31409	7.78902	7.70029	7.74835	7.53471	7.06065	7.45485	7.39655	7.53231	7.41685	7.30164	7.33971	7.37661
CG9451	5.91842	5.61351	5.84377	5.95064	5.90275	5.93342	5.17746	5.56538	5.53665	5.24021	4.98854	5.34994	5.53384	5.85823	5.73132	5.59036	5.73215	5.25272	5.39098	5.13431	5.04227	4.59651	4.68927	4.71455	6.06652	5.91026	6.30945	5.88357	6.01783	6.14956	5.74539	5.5779	5.86271	4.97294	5.09409	4.88437
Rab39	5.26452	5.30419	5.34873	5.31495	5.28111	5.31962	5.18124	5.19535	5.20909	5.27243	5.06483	5.32184	5.26385	5.3254	5.28283	5.33933	5.01039	5.31188	5.10444	5.2198	5.18588	5.24165	5.24904	5.15067	5.14773	5.14349	5.19559	5.19423	5.28727	5.31416	5.12488	5.05879	5.0691	5.11938	5.13371	5.18617
Mad1	2.73852	2.68052	2.83627	2.94261	2.71502	2.90697	2.92087	2.69939	2.8366	3.0849	2.94376	3.00576	2.83924	3.02254	2.79696	2.76121	2.93958	2.76815	2.81105	2.95362	2.95525	3.09057	3.11231	3.18049	2.96009	2.95435	2.95872	2.91714	2.874	3.00413	2.90442	2.87826	2.88107	3.01144	3.00058	3.1412
Spn28D	4.45727	4.40417	4.54472	4.6236	4.91664	4.42298	4.67017	4.70594	4.82176	4.35802	4.35702	4.60926	4.22313	4.33479	4.30704	4.44746	4.62481	4.36722	4.23404	4.28024	4.38036	3.94382	3.89445	3.8229	4.40862	4.54583	4.33977	4.69889	4.66578	4.72991	4.83076	4.8195	4.76571	4.14028	4.43702	4.17423
PSR	4.21959	4.32581	4.27899	4.40845	4.60129	4.53113	4.51975	4.5797	4.41654	4.85954	4.57885	4.77638	4.29288	4.35585	4.23566	4.39436	4.47704	4.3729	4.33409	4.36406	4.33398	4.47072	4.38772	4.38291	4.14215	4.18171	4.18079	4.4735	4.60207	4.59386	4.23016	4.49573	4.27338	4.28448	4.42235	4.35416
CG5315	7.74224	7.85272	7.81115	7.87365	7.72986	7.85407	7.97146	7.93087	7.95308	7.67311	7.76137	7.72947	7.58573	7.60862	7.67704	7.52097	7.31689	7.61347	7.65785	7.79698	7.78027	7.61417	7.79196	7.64852	7.64033	7.67103	7.62295	7.59959	7.63007	7.57672	7.73399	7.76956	7.7311	7.75332	7.74867	7.83862
CG5706	3.40674	3.41397	3.34843	3.59616	3.78372	3.7206	3.47886	3.59446	3.443	4.05359	3.75907	3.72062	3.47723	3.6146	3.46445	3.55258	3.67898	3.45216	3.43092	3.4026	3.52568	3.69682	3.74736	3.7699	3.44391	3.55251	3.58053	3.5677	3.69475	3.784	3.54093	3.37674	3.52214	3.62325	3.74755	3.67678
Hexo2	4.45682	4.75429	4.69497	4.82723	5.16054	4.96037	4.89456	5.24726	4.93548	5.05981	4.69253	4.77423	4.33926	4.58991	4.4153	4.72797	4.62958	4.65748	4.45029	4.5477	4.50893	3.99326	4.20469	4.18917	4.46878	4.64202	4.70427	4.88246	4.96325	4.92512	4.65006	4.7492	5.19318	4.50125	4.64723	4.5229
mbo	2.54081	2.38082	2.56699	2.72645	2.62625	2.76703	2.56881	2.44105	2.55792	3.31672	2.58914	2.7736	2.41376	2.42949	2.35027	2.46075	2.39026	2.50638	2.24407	2.14331	2.31231	2.42418	2.65978	2.9699	2.58079	2.39918	2.61837	2.60644	2.8171	2.73039	2.34249	2.33581	2.52565	2.47792	2.58702	2.77676
CG8783	2.34035	2.35118	2.3901	2.58618	2.00455	2.49346	2.47856	2.47308	2.48216	2.49868	2.62509	2.66569	2.51569	2.56046	2.50192	2.49909	2.6112	2.5797	2.25868	2.53786	2.55487	2.71148	2.58164	2.6879	2.53363	2.34412	2.61676	2.64721	2.49323	2.63919	2.48152	2.44983	2.4427	2.76112	2.58144	2.7887
CG8974	5.44885	5.46351	5.44368	5.62806	5.79184	5.65456	5.41937	5.46246	5.42062	5.81976	5.52235	5.57131	5.29417	5.35232	5.32678	5.42163	4.81817	5.40722	5.24733	5.26848	5.35814	5.27033	5.39739	5.40399	5.35574	5.41439	5.37667	5.49011	5.56393	5.54394	5.46258	5.40076	5.43176	5.42223	5.37924	5.45323
CG13842	-0.38793	-0.402988	-0.673818	-0.189228	-0.249209	-0.504083	-0.54112	-0.694856	-0.502946	-0.36536	-0.570273	-0.342303	-0.309113	-0.457449	-0.243724	0.0778255	0.144754	-0.161588	-0.443255	-0.827326	-0.534172	-0.515359	-0.541303	-0.277103	-0.309342	-0.349976	-0.634563	-0.0888	-0.211245	-0.141152	-0.0976733	-0.277661	-0.467224	-0.755721	-0.230327	-0.589352
CheB38b	5.50993	3.62282	3.65988	5.83596	6.24152	5.44337	3.56822	2.91362	2.84227	5.36393	4.70786	5.23076	4.70592	4.59715	5.16826	6.53427	6.04642	5.72819	0.102506	-0.834334	4.46361	4.41735	4.12604	4.48423	4.16227	4.06651	4.23469	5.95195	5.7303	5.88241	5.73041	5.69154	5.07782	3.02916	5.25359	2.1024
CG17612	1.58449	1.49249	1.55618	1.74482	1.64788	1.76045	1.60475	1.51747	1.5644	1.57675	1.25909	1.61337	1.72483	1.65395	1.67397	1.6847	1.65014	1.75441	1.51324	1.47833	1.70335	1.73025	1.87971	2.12811	1.84818	1.74045	1.77006	1.73616	1.78408	1.79862	1.73356	1.50994	1.61924	1.78277	1.65938	1.88734
CG4164	3.87325	3.95888	3.95658	4.03367	4.28586	4.14583	4.15518	4.24148	4.14616	4.17935	4.07691	4.16271	4.08007	4.29641	4.03322	4.22398	4.38557	4.19991	3.80876	3.92252	3.92493	3.69669	3.97951	4.02147	3.99155	4.0289	4.02216	3.85752	4.22597	4.17263	3.86542	3.8964	3.96429	3.80382	3.83158	3.93796
RanGap	2.50517	2.44455	2.43324	2.72664	2.72569	2.72145	2.51126	2.53987	2.56861	3.13064	2.72077	2.71991	2.46603	2.50944	2.3565	2.37466	2.66727	2.47823	2.35645	2.41926	2.34077	2.41028	2.81998	3.13293	2.5355	2.41859	2.55392	2.63671	2.90313	2.69145	2.47777	2.4468	2.47143	2.62835	2.57084	2.6641
CG1703	4.47383	4.59297	4.64565	4.73649	4.54313	4.84607	4.62982	4.70371	4.71849	4.62096	4.84964	4.90485	4.37657	4.44849	4.33038	4.37917	4.88933	4.51013	4.40457	4.54369	4.52261	4.45743	4.45636	4.58608	4.48143	4.40416	4.46385	4.59734	4.53862	4.55982	4.56197	4.52845	4.5253	4.4692	4.57928	4.56247
CG11802	3.24357	3.30973	3.40374	3.44713	3.6044	3.65817	3.56592	3.58229	3.53951	3.8053	3.53483	3.62951	3.39316	3.53473	3.38471	3.58467	3.58851	3.4443	3.39379	3.38547	3.38424	3.40864	3.50592	3.57438	3.17065	3.26248	3.29815	3.42227	3.59513	3.41294	3.33311	3.40842	3.30825	3.45545	3.34297	3.45904
CG7288	1.7913	2.02182	2.03433	2.17549	2.22169	2.2612	2.02172	2.03052	2.00309	2.94381	2.12174	2.37455	2.08642	2.13149	2.1855	2.15508	1.96237	1.95697	1.9177	2.1989	2.11328	2.23385	2.41902	2.48036	1.96537	2.03848	2.23725	2.20546	2.36752	2.20368	2.03121	1.95565	2.08054	2.03949	2.25152	2.16053
CG11975	4.5495	4.42814	4.59914	4.71711	4.55843	4.76373	4.7212	4.67964	4.57087	4.70459	4.71137	4.76264	4.44549	4.4691	4.39054	4.54506	4.10246	4.58138	4.39533	4.50182	4.47235	4.48849	4.51402	4.53162	4.36308	4.37037	4.45318	4.56262	4.44124	4.54888	4.52482	4.53845	4.47221	4.45473	4.4855	4.53202
CG4721	6.82191	6.6029	6.70331	7.03342	6.92882	6.85334	6.85046	6.89361	6.87161	6.65751	6.73672	6.73303	6.6173	6.61473	6.64533	6.84128	6.67297	6.81115	6.49834	6.65025	6.69856	6.47475	6.39843	6.38439	6.60357	6.56489	6.45152	6.75804	6.66811	6.83103	6.83358	6.84129	6.67399	6.50749	6.7198	6.64127
CG5104	4.7637	4.76804	4.77475	5.01474	5.26552	4.99712	4.8763	4.89179	4.9396	5.03083	4.90139	4.98594	4.86076	5.08588	5.16939	5.15873	4.51409	4.92039	4.93263	5.00359	4.95803	4.72645	4.86205	4.98808	4.60518	4.88352	4.64401	4.93405	4.96967	5.01827	4.98665	4.78337	4.86294	4.90371	4.82022	4.87066
CG13437	0.900665	0.479432	0.569804	1.02341	0.804514	1.0535	0.625879	0.354464	-0.164902	1.41818	1.03261	1.11615	1.20603	1.48832	1.2216	1.13735	0.680823	0.920656	0.0754904	1.19243	0.622079	0.973048	0.580227	0.610394	0.838823	1.06044	0.971044	1.30692	1.21233	1.7174	1.33667	1.41209	1.47538	0.337527	1.24058	1.07127
CG18539	2.61529	2.39196	1.88924	3.65544	3.7332	2.83651	1.79358	1.38437	1.93487	3.70975	2.46454	3.10725	2.1094	3.06313	3.17287	4.10618	3.17822	3.11138	0.27163	0.0418681	2.0714	1.12494	1.7084	2.38816	2.26303	2.43468	1.68147	3.80635	3.28376	3.82936	3.60785	3.72119	3.50472	1.76727	3.65416	1.46067
CG14854	2.10801	2.4114	2.15859	2.7732	2.91926	2.47197	2.08105	2.36448	2.1385	2.64716	1.95387	2.53938	2.22477	2.11883	2.39449	2.83338	2.72046	2.2136	1.47802	1.7761	1.61361	2.06967	1.83084	1.74681	1.94335	1.89485	1.56552	2.48197	2.43204	2.83948	2.49365	2.66675	2.09272	1.43084	2.26853	1.44002
pyr	3.01458	2.95916	3.06316	3.04737	2.27803	3.10385	2.69126	2.69237	2.73481	2.26778	2.49208	2.63409	2.84847	2.97672	3.07613	3.03016	2.61724	3.07511	2.56581	2.63804	2.71944	2.57385	2.60549	2.69852	3.0023	2.98613	2.92464	2.90841	2.52103	2.74669	2.61814	2.69122	2.55657	2.58037	2.68457	2.66894
CG1109	3.21091	3.19539	3.20324	3.44761	3.0458	3.38597	3.32637	3.40958	3.35641	3.41687	3.40176	3.46223	3.18078	3.2716	3.17076	3.30385	3.4285	3.13156	3.17475	3.22144	3.23736	3.18301	3.34827	3.42212	3.18812	3.29174	3.08796	3.33563	3.32378	3.47264	3.26708	3.16115	3.24644	3.14476	3.2857	3.25251
Arf51F	6.03831	6.09416	6.16188	6.17192	6.17812	6.21226	6.14362	6.14267	6.17059	6.0505	6.09877	6.124	5.93766	5.95485	5.97902	6.09747	5.56235	6.12379	5.9454	5.96345	5.99122	6.07998	6.03901	6.03412	6.05168	6.10278	5.9901	6.025	6.00947	6.11331	6.25717	6.06796	5.98975	6.20206	6.1028	6.22693
CG10324	1.92655	2.02516	1.95083	2.24423	2.33427	2.20124	2.1152	2.06194	2.00233	2.2939	2.17054	2.37751	2.01083	2.08096	2.07997	2.29414	2.42433	2.15411	1.86276	2.01342	2.11543	2.24956	2.11187	2.26347	2.01062	2.04624	2.00734	2.02689	2.14357	2.11886	2.18434	2.12058	2.10198	2.31688	2.17896	2.22192
prod	3.81899	3.74459	3.76358	3.97889	3.9504	4.00569	3.85196	3.86782	3.8095	3.96889	3.8328	3.94288	3.82943	3.96626	3.79034	3.90575	3.99668	3.97302	3.75478	3.82269	3.84935	3.96828	3.88307	3.86767	3.63395	3.71718	3.76528	3.77602	3.95335	3.90337	3.79377	3.76912	3.73722	3.74203	3.79524	3.74923
pirk	2.60026	2.42914	3.02237	2.93609	2.94593	3.74492	3.1099	3.4919	2.85275	3.86305	4.19814	3.55669	2.72952	3.04303	2.39019	3.86443	3.52154	3.74761	2.86879	2.8347	2.93344	2.66637	3.01868	2.93162	2.64889	2.78253	2.81376	3.9034	3.22041	3.73948	3.59322	3.65113	3.28868	3.57208	3.46977	3.68575
CG3149	4.55892	4.62852	4.77586	4.65655	4.58219	4.85059	4.7009	4.72226	4.67594	4.78468	4.77675	4.96796	4.3692	4.52911	4.27036	4.52927	4.28032	4.50193	4.44576	4.52896	4.48674	4.48494	4.53653	4.57086	4.37048	4.38608	4.40495	4.35756	4.40401	4.47677	4.40551	4.48802	4.404	4.43252	4.53931	4.58551
kraken	5.70148	5.70886	5.7779	5.90491	5.97347	5.93555	5.57855	5.75276	5.67764	6.48447	6.05467	6.23207	5.48677	5.7297	5.49118	5.59592	5.82255	5.59219	5.52108	5.55883	5.63522	5.67522	5.69092	5.87987	5.46637	5.409	5.50753	5.53838	5.81899	5.69471	5.52913	5.76972	5.71337	5.52268	5.64929	5.60858
Tif-IA	4.31574	4.30845	4.32933	4.65197	4.46324	4.59374	4.35226	4.42499	4.40899	4.69766	4.6111	4.57367	4.32727	4.30346	4.2142	4.41113	4.01661	4.45916	4.24849	4.28954	4.25855	4.33096	4.52929	4.79761	4.36513	4.36923	4.4	4.48453	4.46968	4.51321	4.4364	4.19109	4.33945	4.47685	4.4977	4.66498
Pnn	2.62018	2.45437	2.65827	2.68879	2.74159	2.74683	2.32515	2.43698	2.57797	2.79971	2.61463	2.78824	2.64471	2.59667	2.53805	2.75728	2.75396	2.63496	2.47833	2.65356	2.76482	2.82021	2.74527	2.81238	2.68121	2.70791	2.71109	2.73756	2.64144	2.80713	2.80988	2.59655	2.58426	2.8073	2.69118	2.96433
eff	7.34648	7.27891	7.34425	7.48242	7.12371	7.47852	7.39039	7.42118	7.43255	7.5413	7.53403	7.51503	7.45382	7.38898	7.39451	7.43582	6.6608	7.47121	7.39025	7.41559	7.3716	7.42259	7.43592	7.47198	7.40522	7.38981	7.37026	7.39884	7.43699	7.49785	7.40067	7.34463	7.36085	7.43102	7.38982	7.44155
CG10962	2.00068	1.94224	2.03233	1.89065	2.17011	2.0847	1.83684	2.58438	2.20966	1.71198	1.80968	1.83541	2.14587	2.15534	1.75748	2.32863	2.54997	2.2912	1.86882	1.79485	2.13867	1.60393	1.76747	1.6879	1.93518	1.93306	1.83567	1.78241	2.05916	1.79626	1.56616	1.9945	1.69452	1.32063	1.55535	1.49078
CG13151	1.61772	1.21411	1.32367	1.62561	1.63214	1.70298	1.4371	1.49033	1.53915	1.88712	1.44623	1.65136	1.7522	1.71727	1.81876	1.79956	1.99252	1.90638	1.60226	1.46618	1.78405	1.87562	1.80088	1.91545	1.61743	1.71408	1.7488	1.57233	2.02775	2.00104	1.46317	1.56864	1.51337	1.5638	1.89499	1.85958
CG13309	3.79161	5.78216	5.49961	3.14395	3.34633	3.60693	3.80692	3.73896	2.91759	6.83841	5.94784	5.62977	5.55869	4.99454	3.9962	4.2725	3.41961	4.4481	4.03154	4.89254	4.05536	3.1536	4.68472	4.86307	2.5716	3.18254	3.63853	2.9402	4.08126	3.01894	2.73762	2.99535	3.8941	3.81318	4.11176	4.42138
CG7149	4.01696	4.1421	4.12241	3.94022	3.793	3.99951	3.74739	3.76402	3.6282	3.54161	3.71347	3.65346	3.98779	3.91642	3.81337	3.66118	3.52616	3.65547	3.58136	3.60692	3.51737	3.48146	3.51678	3.49451	4.29543	4.3435	4.24908	4.0918	4.00695	4.13278	3.77898	3.69939	3.87707	3.70559	3.65568	3.74062
Gdi	6.50395	6.56065	6.58648	6.64863	6.6459	6.67624	6.63185	6.70743	6.65472	6.72618	6.63772	6.68884	6.49036	6.56511	6.47157	6.61589	6.6318	6.62044	6.42742	6.50391	6.54313	6.53001	6.62291	6.59608	6.35238	6.38208	6.41173	6.52359	6.61421	6.564	6.51481	6.47266	6.49474	6.53508	6.56967	6.56459
Jheh2	7.25917	7.45743	7.17454	7.42412	7.45106	7.40616	7.16962	7.12368	6.89267	7.43615	7.3098	7.25503	7.33647	7.51114	7.35816	7.50841	7.25808	7.40005	6.73631	6.94657	6.96478	6.95152	7.10351	7.10244	6.96817	7.03979	7.03507	7.22355	7.21206	7.26146	6.89455	6.92163	6.98539	6.90901	7.06934	6.96149
Ntf-2	3.78365	3.90916	3.90938	4.14998	4.33854	4.22352	3.96693	4.07013	3.92762	4.4737	4.13396	4.26599	3.80928	3.78936	3.76372	3.96116	3.54358	3.85322	3.88043	3.88655	3.86897	3.80543	3.8454	3.82722	3.65238	3.73082	3.7277	3.85652	4.01412	3.91642	3.86577	3.85342	3.82505	3.85124	3.78885	3.87766
rush	5.68727	5.58972	5.73531	5.82398	5.80575	5.89303	5.81829	5.81328	5.71676	5.86203	5.8368	6.00873	5.51693	5.7024	5.50242	5.61986	5.71556	5.68181	5.63832	5.68308	5.61213	5.63131	5.59256	5.66778	5.49724	5.54824	5.53736	5.67443	5.69749	5.70792	5.66226	5.79303	5.6903	5.5567	5.74644	5.61154
GNBP1	3.88292	3.87258	3.93381	3.94495	3.96082	4.01806	3.81664	3.86336	3.8556	4.05678	3.93264	3.91991	3.82361	3.73661	3.67757	3.89882	3.80658	3.61285	3.55645	3.74019	3.76245	3.70486	3.84655	3.62794	3.66858	3.71054	3.52318	3.82933	3.79013	3.92939	3.81202	3.79484	3.77696	3.68033	3.8894	3.87075
CG10286	2.88928	2.94587	3.20744	3.17462	3.20562	3.37598	3.14143	3.13737	3.12306	3.40362	3.3403	3.38951	3.21709	3.30227	3.12342	3.17542	3.38678	3.34878	3.14979	3.28384	3.28416	3.34852	3.38974	3.43505	2.90863	3.03708	3.006	3.10186	3.21583	3.17124	2.92422	2.86601	2.97806	3.11554	3.20919	3.27824
CG18537	3.10551	2.62505	2.41416	4.01436	4.4097	3.235	2.29027	1.98656	2.03976	3.90234	2.53258	3.51036	2.61178	3.24869	3.14285	4.27141	3.61772	3.3678	0.21014	0.972994	1.95517	1.92054	1.92211	2.24781	2.36888	2.82314	2.56946	4.06032	3.82412	4.18957	3.96092	3.92478	3.67647	2.26796	3.74732	1.53579
Aats-gln	4.81935	4.82166	4.94415	5.03242	5.0176	5.21784	4.99937	4.98686	4.96727	5.01214	5.03635	5.16123	4.70745	4.7535	4.72693	4.70897	5.10517	4.78517	4.73763	4.74909	4.77853	4.73674	4.76656	4.75342	4.61402	4.62115	4.66347	4.6872	4.85178	4.7638	4.63225	4.70781	4.69732	4.66989	4.82635	4.72687
CG1360	1.33342	1.40693	1.39424	1.56534	1.57461	1.62003	1.40109	1.42673	1.55697	1.72312	1.63081	1.65822	1.49058	1.61734	1.61041	1.67788	1.54158	1.57313	1.19532	1.67266	1.34312	1.62959	1.81645	1.87792	1.68435	1.59369	1.61292	1.65054	1.77836	1.96403	1.49227	1.54759	1.39064	1.74011	1.74302	1.66662
CG11242	3.60767	3.70253	3.72433	4.12427	4.10079	4.21957	3.86127	3.87	3.82361	4.57019	3.94794	4.23904	3.85518	3.93355	3.83185	3.8276	3.9142	3.91338	3.66701	3.83049	3.85232	3.88734	3.92869	4.19009	3.63101	3.5721	3.81491	3.83369	4.05569	4.00846	3.91614	3.72042	3.84393	3.83189	3.87884	3.90592
CG4542	2.87259	3.06889	2.94294	3.22466	3.29414	3.21917	2.98079	3.01494	2.85647	3.27705	3.17402	3.40011	2.99734	3.11214	2.94493	2.99969	3.04233	3.1994	2.78513	2.86149	2.95435	2.87049	2.98463	2.98053	2.9617	2.84046	2.93197	3.00251	3.32445	3.17982	2.90584	3.04166	2.89974	2.87222	3.08149	3.01544
CG6272	5.37485	5.37009	5.41101	5.72542	5.73293	5.57813	5.49729	5.4912	5.54447	5.67095	5.36492	5.70923	5.22494	5.12744	5.24467	5.49821	4.84936	5.413	4.95691	5.18235	5.32415	5.24658	5.2874	5.26203	5.28707	5.33718	5.26182	5.33725	5.52039	5.52235	5.53707	5.28591	5.28494	5.44018	5.28722	5.49652
CG31808	6.43305	6.50786	6.42386	6.35669	6.28677	6.41451	6.23895	6.29539	6.23857	6.04993	6.18638	6.24686	6.38417	6.42759	6.40521	6.35695	5.99265	6.36277	6.25509	6.28067	6.26742	6.35429	6.19059	6.08917	6.4512	6.40699	6.43984	6.3957	6.2055	6.48868	6.45735	6.2644	6.30839	6.35789	6.25332	6.3953
CG9104	3.35058	3.40872	3.33996	3.55428	3.87091	3.66554	3.49366	3.60754	3.44919	3.89072	3.60087	3.66778	3.35742	3.63103	3.35949	3.55003	3.71627	3.54679	3.39619	3.40186	3.43065	3.40384	3.5025	3.49294	3.35401	3.29208	3.43673	3.56915	3.61711	3.65311	3.39986	3.47158	3.55908	3.48464	3.4486	3.47108
CG3857	0.986925	0.965064	0.990349	1.12923	1.00548	1.31986	1.21795	1.17009	1.31696	1.27691	1.30712	1.24894	1.1063	1.27103	1.09566	1.25255	1.02512	1.08827	1.08262	1.01241	1.04409	1.3085	1.22358	1.34132	1.07925	1.00156	1.07079	1.18943	1.15963	1.16318	0.969256	0.966471	0.936984	1.1772	1.30203	1.19815
CG7900	3.64323	3.81407	3.60312	3.98095	4.11624	3.96213	3.88863	4.15437	3.9685	3.98002	3.75661	3.7581	3.67345	3.76739	3.59663	3.78433	3.61474	3.86637	3.59258	3.52694	3.86237	3.49161	3.55486	3.68659	3.35701	3.64253	3.5195	3.64297	3.71543	3.81844	3.87065	3.87918	3.7764	3.49397	3.77954	3.5121
Ssu72	3.36259	3.35543	3.49592	3.43993	3.4368	3.60422	3.34725	3.45202	3.38115	3.46425	3.41565	3.57591	3.24398	3.4354	3.29852	3.32431	3.19908	3.3489	3.25168	3.38676	3.25563	3.26624	3.33143	3.41987	3.21973	3.23984	3.18872	3.39249	3.41388	3.46722	3.31033	3.32452	3.3238	3.30207	3.23484	3.40121
CG5597	7.64936	7.67911	7.66487	7.95447	8.81591	8.30188	7.90671	8.03875	7.9634	8.56652	8.12417	8.39357	7.61472	7.40129	7.1922	7.77388	7.52197	7.60914	7.52445	7.74609	7.80143	7.65407	7.42848	7.6829	7.61189	7.66659	7.4329	7.71721	8.19036	7.89186	7.79981	7.86702	7.66775	7.72624	7.7648	7.88962
CycD	2.79901	2.79669	2.88005	3.08498	2.46504	3.1316	2.87603	2.9639	2.96611	3.12474	3.19572	3.11937	2.80585	2.79438	2.69328	2.93538	2.611	2.89592	2.63194	2.72108	2.77592	2.82281	2.90422	2.89883	2.85815	2.82077	2.77718	2.90675	2.77013	2.87637	2.86386	2.81896	2.87228	2.858	2.84007	3.01682
Ilp5	-0.729894	-0.449641	-0.563823	-0.295442	0.0536274	-0.0678446	-0.423698	-0.405596	-0.202526	0.196431	0.376293	-0.112154	-0.334054	-0.0343567	-0.753339	-0.121709	-0.498815	-0.531345	-0.299081	-0.385738	-0.36604	-0.0201928	-0.315046	0.014521	0.0112276	-0.561279	-0.335529	-0.414689	-0.312083	-0.32702	-0.403885	-0.129004	-0.346913	-0.0750837	-0.0216641	0.0188971
Uch-L3	3.30081	3.30543	3.35035	3.63978	3.853	3.60119	3.41283	3.48788	3.39928	4.40143	3.48385	3.65682	3.031	3.1249	3.02792	3.20586	3.42503	3.04893	3.03003	2.94565	3.01541	3.05903	3.84446	4.22786	2.98017	2.9544	3.04138	3.1999	3.6683	3.17407	3.0079	3.03794	2.89718	3.19263	3.0316	3.35365
CG1622	3.17301	3.19888	3.2268	3.33783	3.26657	3.38913	3.16549	3.13547	3.26988	3.28013	3.33068	3.53335	3.02886	3.12916	3.24232	3.17656	3.21224	3.15833	3.11061	3.16667	3.21211	3.19811	3.21261	3.31513	3.11388	3.16898	3.14139	3.24484	3.24097	3.29042	3.19931	3.17861	3.21705	3.13643	3.23709	3.23953
Obp49a	5.72249	4.72736	4.26401	6.1676	6.50677	5.80505	4.59993	3.56153	4.25127	6.44209	5.18703	5.96571	3.60043	3.76628	4.0316	5.49117	5.21747	4.34598	-0.0782062	-0.0576935	2.99187	3.17626	3.02942	3.26035	4.50344	4.29285	4.17235	5.77022	5.65183	5.99517	5.71675	5.74932	5.44228	3.52523	5.42739	3.55373
CG1416	5.38516	5.32343	5.33863	5.50651	5.57034	5.51508	5.39841	5.61968	5.37938	5.83902	5.64117	5.66401	5.30496	5.22245	5.15119	5.29787	5.38682	5.31977	5.27293	5.37724	5.37962	5.16894	5.35481	5.38337	5.20473	5.2897	5.31403	5.43085	5.47864	5.44777	5.50072	5.45485	5.40058	5.36108	5.35721	5.4246
Hsc70-4	9.5326	9.57205	9.57235	9.61217	9.38271	9.71267	9.68025	9.76068	9.68106	9.79926	9.74593	9.98294	9.6305	9.71916	9.61794	9.57087	9.76378	9.64792	9.64951	9.7955	9.80552	9.65987	9.85016	9.92974	9.40719	9.35983	9.41107	9.58586	9.54935	9.58695	9.60656	9.69145	9.68123	9.61656	9.72372	9.54804
tra2	3.42727	3.48585	3.52145	3.58677	3.3353	3.77126	3.66592	3.68985	3.68357	3.71383	3.71823	3.75061	3.41088	3.42081	3.29997	3.49395	2.76131	3.61402	3.32239	3.31319	3.32007	3.47427	3.62245	3.95366	3.32128	3.37427	3.24944	3.57455	3.43262	3.57114	3.36471	3.25531	3.28575	3.38177	3.42202	3.55143
Tsp3A	2.11035	2.24389	2.20348	2.10005	1.88161	2.1903	1.94737	2.10841	2.07999	2.13014	2.30164	2.22997	2.23354	2.45108	1.97553	2.23993	2.13688	2.27907	2.21095	2.25353	2.2082	2.37423	2.07341	2.13187	2.17635	2.32664	2.15639	2.35819	1.95546	2.21246	2.17	2.14946	2.30136	2.2844	2.29996	2.23643
fidipidine	3.31455	3.4188	3.36684	3.58053	3.58111	3.6836	3.43539	3.43271	3.48819	3.45653	3.49746	3.70723	3.3055	3.37635	3.28447	3.32679	3.55296	3.26081	3.21739	3.11473	3.23076	3.32764	3.34516	3.38332	3.30198	3.2237	3.43585	3.49816	3.52278	3.57447	3.26808	3.16701	3.164	3.37054	3.39415	3.47825
Aats-thr	5.20913	5.15472	5.30238	5.32569	5.31472	5.42967	5.28757	5.31368	5.22996	5.58092	5.4065	5.53665	5.07864	5.15628	5.0476	5.00215	5.32217	5.11039	5.11041	5.08294	5.09553	5.22346	5.15269	5.17742	5.1681	5.14559	5.31673	5.30049	5.3399	5.31428	5.38515	5.32477	5.26306	5.21996	5.28917	5.31794
Inos	7.54477	7.55766	7.53418	7.84061	8.13612	7.77721	7.89545	7.85817	7.89024	7.3934	7.20448	7.45341	7.24295	7.55942	7.61176	7.72807	7.67408	7.59793	7.52904	7.62602	7.55893	7.05878	7.10041	7.04628	7.50541	7.45593	7.43379	7.83108	7.94244	7.94438	7.87253	7.79056	7.83763	7.22534	7.39674	7.29842
loj	4.42168	4.39483	4.43962	4.70609	4.87988	4.69581	4.56461	4.78683	4.57789	4.99549	4.73601	4.65411	4.24906	4.35331	4.16843	4.4453	4.02648	4.58089	4.18838	4.32915	4.33613	4.41	4.50677	4.47209	4.36752	4.4181	4.44612	4.5463	4.86708	4.66106	4.58589	4.61282	4.61478	4.4398	4.64434	4.6453
CG10516	4.37917	4.32815	4.50686	4.52031	4.86885	4.66364	4.44249	4.95942	5.08442	5.43953	5.3331	5.24629	5.02125	5.18331	4.52144	5.59141	5.1656	5.30288	5.0209	5.01281	4.78851	4.08932	4.4654	4.31258	4.62231	4.59154	4.64878	5.09124	5.42657	5.21646	4.86908	4.93539	5.2765	4.6259	5.17041	4.74614
PH4alphaEFB	3.80688	3.86705	4.01351	3.93964	3.99268	4.08228	4.06676	4.28131	4.15625	3.69248	3.90812	3.99014	3.91647	3.94631	3.91554	4.01289	4.23338	3.92314	3.88198	4.0368	4.0047	3.67028	3.73068	3.73079	3.83402	3.84395	3.80438	4.04878	3.81379	4.02193	4.16123	4.02601	4.16895	3.8268	3.84094	3.82241
CG11857	5.35791	5.38163	5.37459	5.46805	4.95969	5.60387	5.46633	5.5639	5.46957	5.50229	5.52456	5.54604	5.22414	5.32799	5.22523	5.30176	4.98644	5.31978	5.01421	5.18195	5.17676	5.20421	5.37387	5.39577	5.276	5.26278	5.25617	5.31139	5.14296	5.34445	5.27036	5.1649	5.29733	5.19351	5.31375	5.3072
Ate1	4.5939	4.71656	4.66291	4.56271	4.57969	4.52498	4.35141	4.34192	4.31805	4.54164	4.30416	4.40047	4.20369	4.2292	4.22869	4.12166	4.00992	4.07577	3.87574	3.89121	3.90689	4.11048	4.10061	4.06859	4.75812	4.77078	4.76036	4.37071	4.50093	4.52156	4.30174	4.30785	4.20111	4.23371	4.24053	4.34597
CG7745	2.33204	2.28476	2.2834	2.49426	2.17741	2.5445	2.36541	2.39504	2.46428	2.53283	2.57698	2.61809	2.43522	2.51449	2.40046	2.49604	2.06013	2.57873	2.40708	2.43725	2.32993	2.55436	2.67603	2.78583	2.3565	2.21664	2.20011	2.23222	2.211	2.30426	2.29576	2.1872	2.21362	2.35885	2.29351	2.44072
CG10311	6.529	6.60412	6.70947	6.98966	7.26494	7.00605	6.9574	7.00247	6.99923	7.05927	6.72476	6.95257	6.5764	6.73103	6.55897	6.9308	6.68162	6.82196	6.77556	6.80498	6.76788	6.66568	6.62585	6.52431	6.43567	6.46992	6.28227	6.77749	6.90313	6.96527	6.84075	6.7265	6.66811	6.57064	6.57965	6.6431
CG8550	3.16563	2.96663	3.05628	3.26086	3.42113	3.41668	3.44988	3.60882	3.68792	3.39916	3.37819	3.21269	3.22993	3.03857	3.16885	3.92123	3.62989	3.67609	3.20555	3.52416	3.46956	3.42648	3.40659	3.36795	1.92481	2.42434	2.00756	2.79122	2.52577	2.74661	3.24182	3.04531	2.93566	2.72926	3.1633	2.66722
Fuca	3.44626	3.3435	3.60715	4.04106	4.03014	3.93361	3.69723	3.87994	3.73528	2.87477	2.8689	3.38802	3.6605	4.05879	3.95963	3.9052	4.01636	4.08924	3.87401	4.22021	3.98545	2.87874	3.35304	3.13587	3.70613	3.5741	3.40028	3.79721	3.64733	3.7733	3.65825	3.55026	3.74583	2.96736	3.29381	2.97436
Nufip	1.35354	1.59111	1.53217	1.6393	1.7133	1.80726	1.54226	1.40351	1.63076	1.50455	1.54001	1.57926	1.7092	1.59959	1.58491	1.44411	1.75244	1.63704	1.45072	1.573	1.40563	1.49872	1.53523	1.62036	1.52012	1.59814	1.75766	1.7415	1.79281	1.72904	1.70734	1.41922	1.7741	1.61048	1.74862	1.63174
CG3542	2.61811	2.72916	2.76045	2.86199	3.1232	2.98223	2.8178	2.71649	2.76134	3.0907	2.95411	2.90162	2.80324	2.85146	2.78642	2.82413	3.13634	2.80337	2.7183	2.80488	2.7845	2.81491	2.81771	2.8591	2.79253	2.68582	2.75691	2.69722	2.9669	2.87423	2.68191	2.59288	2.71577	2.81677	2.8039	2.75716
CG6495	3.81115	3.59132	3.80066	3.73629	3.8029	3.86618	4.03457	3.96801	4.03086	3.67697	3.74054	3.94273	3.53642	3.50758	3.46704	3.64738	3.80187	3.66166	3.78291	3.6373	3.59796	3.80156	3.7021	3.61699	3.55575	3.70182	3.61974	3.7492	3.70265	3.75076	3.81206	3.86332	3.93815	3.91358	3.81766	3.94965
CG5484	4.14342	4.17147	4.20911	4.39105	4.66159	4.49089	4.25039	4.50069	4.45938	4.74466	4.50591	4.59056	4.13479	4.24392	4.01106	4.1618	3.87184	4.15751	4.00334	4.02518	4.08969	4.27889	4.23883	4.45505	3.98817	4.13374	4.17636	4.29323	4.453	4.50398	4.10162	4.09795	4.26118	4.17239	4.17009	4.29714
agt	3.6357	3.83343	3.64995	4.25979	4.48906	4.25419	3.85627	3.78404	3.85069	4.33719	4.03826	4.03608	3.87794	3.96173	3.61681	4.11428	3.93933	3.93993	3.94352	3.74143	3.89502	3.8689	3.69701	3.79779	3.95448	3.68976	3.67655	3.84342	4.12786	3.96666	3.79976	3.52923	3.60519	3.47229	3.7792	3.87152
CG4749	2.54848	2.48239	2.6711	2.70228	3.05985	2.8104	2.5698	2.78259	2.69828	2.99256	3.04847	2.9126	2.62848	2.86646	2.80193	2.87699	2.83975	2.65835	2.58736	2.57397	2.59762	2.7938	2.54903	2.60434	2.89397	2.65817	2.72003	2.66562	2.74753	2.84592	2.571	2.70936	2.57204	2.71258	2.49809	2.80693
T3dh	3.4864	3.49358	3.50877	3.19691	3.29365	3.20179	3.23661	3.35161	3.33148	3.72874	3.32181	3.38077	3.4462	3.26876	3.16146	3.29454	3.56895	3.23669	3.03396	3.17939	3.21259	3.1597	3.2539	3.30848	3.23903	3.33435	3.38296	3.31809	3.52688	3.38038	3.23233	3.14525	3.23329	3.38288	3.27155	3.36056
CG7409	9.84473	9.74968	9.70346	9.55924	10.0725	9.22802	9.06611	9.12221	9.02026	9.46322	9.12097	9.14113	9.87646	9.6097	9.65098	9.66261	9.82119	9.25627	9.09594	9.17943	9.3804	9.33767	9.09859	9.12699	9.38845	9.43744	9.28056	9.24662	9.28766	9.41483	9.24105	8.95536	8.83351	8.95765	8.86669	8.79743
Sap30	3.3663	3.31715	3.3221	3.45539	3.5012	3.46258	3.28442	3.32	3.35283	3.49833	3.27058	3.54293	3.26845	3.49321	3.15881	3.35387	3.09983	3.40233	3.24932	3.36144	3.26873	3.29672	3.35308	3.46522	3.2538	3.24159	3.29707	3.38297	3.39681	3.56647	3.29286	3.18921	3.23272	3.24644	3.30982	3.31165
mnd	3.23324	3.39522	3.37129	3.3371	3.00914	3.69781	3.51287	3.43597	3.44803	3.10857	3.24779	3.17965	3.45228	3.43725	3.46784	3.37698	3.37077	3.38999	3.11812	3.2928	3.2571	3.59132	3.51509	3.47652	3.58366	3.66287	3.65267	3.55651	3.19919	3.52919	3.36412	3.23302	3.51988	3.60617	3.5306	3.64186
CG32638	4.83046	4.74154	4.89524	4.98803	4.92722	5.05036	4.93033	5.00173	4.96764	5.38532	5.1453	5.18708	4.62009	4.61581	4.64009	4.75681	4.37478	4.78089	4.66594	4.77302	4.63222	4.75962	4.80446	4.77819	4.54516	4.61265	4.58178	4.69988	4.6932	4.85307	4.73979	4.70289	4.81749	4.74905	4.88403	4.90937
CG15100	3.12712	3.0765	3.10277	3.22829	2.78418	3.31966	3.12293	3.11296	3.14789	3.47049	3.27789	3.40168	2.95709	2.9312	2.97395	2.9517	3.10823	3.00742	2.9523	2.86402	2.94187	3.06557	3.29355	3.82363	2.92835	2.90391	2.99391	2.96592	2.94531	2.97607	2.90614	2.9723	2.95389	3.03258	2.97715	3.18044
mdy	5.00223	4.88086	5.05693	4.57313	3.90506	4.37793	3.77334	4.04507	3.96926	4.00423	4.79629	4.40828	4.91238	4.61678	4.72217	4.56783	4.2978	4.67499	3.88009	3.98621	3.99382	4.2319	4.42598	4.33875	4.65958	4.60992	4.7303	4.5041	4.27251	4.30996	4.05259	3.81589	4.05228	4.31407	4.51017	4.49674
Pis	5.975	5.99479	5.99266	6.17959	6.21298	6.2053	6.02202	6.10409	6.03163	6.10286	5.98392	6.08207	5.78194	5.81636	5.63568	5.8458	5.53924	5.86851	5.64653	5.76526	5.6975	5.73188	5.78889	5.82676	5.49737	5.59667	5.60333	5.81493	5.7628	5.8349	5.71662	5.79651	5.73803	5.64604	5.77412	5.78313
CG3709	1.59447	1.68686	1.61232	1.88019	2.10791	1.86158	1.6974	1.52843	1.6711	2.11974	1.76224	1.92736	2.12495	1.68961	1.76483	2.39486	1.90642	1.81334	1.64395	1.61517	1.80991	2.24476	2.15951	2.08886	1.72673	1.74833	1.63245	1.87476	1.86613	1.95836	1.65531	1.55489	1.60263	1.98215	1.93261	1.82416
CG5199	2.22131	2.31007	2.55873	2.57836	2.39661	2.53646	2.35104	2.25793	2.3068	2.42486	2.27991	2.43059	2.47069	2.66389	2.16579	2.43869	2.4119	2.39115	2.17598	2.25467	2.18124	2.24928	2.44234	2.33514	2.3448	2.30629	2.38952	2.36398	2.43924	2.44811	2.12992	2.4533	2.18773	2.41938	2.38171	2.44014
Hs2st	3.88859	3.85802	3.86704	4.05253	3.95787	4.07652	3.88551	3.92614	3.93621	4.10375	3.98061	4.02876	3.6312	3.62085	3.60753	3.58494	3.51005	3.76408	3.57612	3.65323	3.55438	3.72917	3.7699	3.84996	3.68937	3.65346	3.63031	3.74967	3.74338	3.79858	3.77734	3.738	3.59563	3.84373	3.85195	3.85034
VhaM9.7-c	5.73154	5.66019	5.66021	5.82779	5.93333	5.91993	5.76901	5.80371	5.80608	5.89353	5.78571	5.82423	5.39564	5.46753	5.34048	5.51638	4.53822	5.60187	5.49049	5.47105	5.41533	5.50724	5.37513	5.49018	5.25267	5.3408	5.38773	5.4068	5.63753	5.62767	5.36103	5.4205	5.3678	5.383	5.47035	5.49628
Sry-delta	3.24429	3.27255	3.261	3.48217	3.57646	3.48513	3.508	3.54383	3.46969	3.88861	3.46236	3.49703	3.40754	3.42142	3.38866	3.46044	3.76277	3.34227	3.33943	3.39939	3.3779	3.37251	3.3559	3.47901	3.20109	3.24452	3.21431	3.46493	3.65955	3.47611	3.34029	3.46504	3.44388	3.23332	3.44254	3.34327
CG5292	3.08529	3.08786	3.01686	3.28726	3.32178	3.14883	2.91448	3.11999	3.07472	3.34383	3.28841	3.20995	2.96011	3.0172	2.88287	3.07704	2.89027	2.96756	2.83997	3.1875	3.02369	3.04527	3.16505	3.10695	2.8923	2.91598	2.89368	3.03168	3.20811	3.20845	3.01988	2.88048	2.94906	3.04759	3.13037	3.20364
CG8064	2.42538	2.43327	2.60248	2.6801	2.68389	2.74503	2.65145	2.66627	2.51925	2.85865	2.83765	2.70458	2.51311	2.4461	2.55209	2.40927	2.68046	2.35015	2.37656	2.46405	2.36765	2.48446	2.66646	2.64703	2.5437	2.45599	2.44449	2.49687	2.73226	2.50946	2.40833	2.29964	2.34305	2.65207	2.57021	2.59511
CG32023	3.18213	4.35433	4.49806	2.83602	3.70649	4.14101	3.64833	3.42902	2.83265	5.83415	4.97074	3.97157	4.69764	4.31652	3.17484	3.44255	3.68982	3.66366	2.66398	3.63464	3.14705	2.30037	2.85883	3.57182	2.71412	3.1819	4.10189	2.87451	4.15603	2.59618	2.76316	2.64692	3.87821	2.79126	3.01975	3.13645
CG2260	1.99643	2.13795	2.15042	2.34753	2.58167	2.3385	2.30044	2.27168	2.10122	2.72895	2.52211	2.43114	2.05375	2.05873	1.83618	2.04981	2.43593	2.21309	1.98514	1.91297	1.93001	2.26325	2.32441	2.21602	2.04316	2.32503	2.21061	2.36408	2.63346	2.38756	2.20755	2.15242	2.2004	2.47016	2.26148	2.27551
La	4.917	5.11491	5.14896	5.18747	5.39151	5.35201	5.21637	5.14239	4.95669	5.56321	5.37873	5.44781	4.69673	4.83575	4.72929	4.80346	4.96102	4.86595	4.64129	4.76167	4.76222	4.81819	4.86666	4.97989	4.89737	4.94652	4.9238	5.0127	5.2304	5.12311	4.92124	4.87068	4.84401	5.02097	5.04103	5.07268
CG42806	4.17868	4.24549	4.20866	3.91628	4.0531	3.85989	3.94185	4.06745	3.93467	4.49515	4.28617	4.17813	4.13861	4.19855	4.09401	3.85414	3.67496	3.92235	3.90207	3.94135	4.03623	4.17873	4.3715	4.18572	4.11939	4.22972	4.16685	3.80814	4.23573	4.045	3.96298	3.86915	4.02961	4.34809	4.29635	4.26898
CG1671	2.66705	2.58486	2.76451	2.91896	2.6488	2.98361	2.73403	2.85548	2.73173	3.03179	3.09417	3.07903	2.61959	2.62456	2.4866	2.65945	2.78123	2.60288	2.58994	2.3765	2.48026	2.69566	2.80035	2.80644	2.54982	2.50537	2.49208	2.60716	2.64316	2.75481	2.43284	2.34565	2.43371	2.62504	2.81545	2.66441
Art3	2.54181	2.62731	2.71823	2.96829	3.09162	2.91486	2.77025	2.73353	2.69764	3.50124	3.06393	3.0598	2.51944	2.85945	2.85097	2.88319	2.77868	2.72585	2.55181	2.62228	2.56793	2.80083	2.97943	3.17844	2.67668	2.57584	2.6303	2.78185	3.10444	3.00859	2.57784	2.41915	2.63679	2.76479	2.83963	2.98079
Tbp-1	5.43645	5.47352	5.4996	5.72393	5.92383	5.7875	5.57372	5.68599	5.52642	6.26351	5.78859	5.88257	5.26373	5.40196	5.13882	5.3201	5.51245	5.33835	5.03868	5.15499	5.16148	5.22416	5.4714	5.56812	5.12335	5.14255	5.24153	5.41615	5.63691	5.57122	5.24801	5.30789	5.33737	5.39588	5.4648	5.47278
CG4901	3.09299	3.06787	3.07954	3.34156	3.2997	3.26755	3.19834	3.12425	3.12731	3.30929	3.14571	3.32814	3.00277	3.13304	3.11807	3.12853	3.19401	3.18361	2.81079	3.05013	3.08749	3.07922	3.20738	3.19188	2.88333	2.9314	2.94961	3.10339	3.06914	3.22381	2.96774	2.92095	2.96088	3.09428	3.0087	3.14996
pit	2.62225	2.7219	2.82551	2.98624	2.80455	2.95421	2.86874	2.99345	2.83806	3.18662	3.27972	3.11206	2.75112	2.75226	2.63242	2.78676	3.0274	2.72131	2.65606	2.71284	2.68048	2.8803	3.01368	2.95695	2.77491	2.78441	3.01892	2.96287	2.8246	2.90747	2.78	2.56726	2.77862	2.96209	3.12134	2.90773
l(2)35Bg	3.86584	3.91708	3.95082	4.09726	4.07749	4.18559	3.93942	3.97501	3.97671	4.40595	4.20617	4.09123	3.67725	3.72671	3.58617	3.6981	3.95074	3.676	3.57675	3.73224	3.74374	3.75889	3.78501	3.93663	3.59221	3.61543	3.62771	3.66424	3.81159	3.81431	3.71351	3.82343	3.73523	3.75104	3.8293	3.94073
Art8	1.66267	1.73759	1.71104	2.03902	2.32322	2.06975	1.8281	1.97798	1.6824	2.86975	2.23093	2.1435	1.9497	2.25397	1.96699	1.67643	2.02862	1.74758	1.64988	1.57688	1.56046	1.94984	2.26135	2.13957	1.888	1.85015	2.12896	2.12822	2.27017	2.4107	1.65869	1.46692	1.70557	2.2357	2.27424	2.21621
CG4670	5.26551	5.32871	5.38373	5.311	5.23534	5.3572	5.25242	5.41895	5.34136	5.72632	5.56716	5.64126	4.80713	4.77761	4.76954	4.93434	4.91921	4.87871	4.61177	4.79737	4.79426	4.83448	5.18884	5.0019	4.67027	4.67457	4.62671	4.80958	5.04547	4.89529	4.80012	4.85292	4.8112	4.80231	5.07068	4.89808
CG6388	3.02605	3.29222	3.22401	3.43043	3.55521	3.43934	3.35553	3.40427	3.31943	3.89599	3.49096	3.60243	3.21215	3.2658	3.24585	3.17935	3.42482	3.38169	3.18275	3.27316	3.08403	3.34864	3.49852	3.34965	3.07895	3.15009	3.12929	3.28299	3.49266	3.42139	3.13736	3.06676	3.16937	3.24321	3.30095	3.34771
Art1	3.83487	3.96122	3.90018	4.15102	4.09876	4.26078	3.90389	3.97743	3.88274	4.39928	4.3025	4.18538	3.69476	3.94717	3.7371	3.771	3.64342	3.79443	3.64779	3.75	3.68027	3.86762	3.97664	3.92444	3.79944	3.75994	3.78021	3.9585	3.96607	3.91938	3.67359	3.62638	3.67228	3.95309	3.97973	4.05442
CG1544	3.12422	3.3167	3.24203	2.96671	3.04185	2.9341	3.23257	3.333	3.41194	2.82966	3.19264	2.86258	2.7469	2.4664	2.63144	2.6111	2.78379	2.68094	2.22807	2.67582	2.59623	2.05873	2.34779	2.4602	2.80784	2.85463	2.56772	2.49853	2.42581	2.38741	2.74506	2.97378	2.67768	2.46413	2.54034	2.44639
CG12014	1.06639	1.21101	1.15551	1.62801	1.77769	1.57359	1.08346	1.10295	0.792639	1.60763	1.25863	1.36388	1.07799	1.21737	0.875563	1.31765	1.57915	1.38516	1.44556	1.24725	1.45551	1.38878	1.40745	1.25731	1.10337	1.01154	1.28178	1.57282	1.53206	1.52997	1.44824	1.23233	1.65215	1.31922	1.37479	1.46387
Drp1	4.96709	5.0716	5.11221	5.13278	4.75294	5.12179	4.98148	4.97058	5.06804	5.11563	5.18752	5.22624	4.76251	4.86919	4.77789	4.78576	4.7216	4.83523	4.69494	4.81257	4.77029	4.82109	4.943	5.1219	4.6544	4.63733	4.64948	4.75565	4.67844	4.76334	4.72901	4.78459	4.74088	4.76007	4.8264	4.79841
CG2837	2.57192	2.47819	1.42753	2.05406	1.8347	0.842852	1.82618	1.13172	1.94902	2.84347	1.94437	2.66168	2.13807	2.48763	2.73744	2.184	1.8845	1.57539	1.1062	0.819831	1.9366	2.53381	2.23976	2.25821	1.231	1.36174	0.773676	0.966	0.625024	1.10819	1.56977	1.60031	1.29476	1.24703	2.27698	1.64652
Hdc	2.11044	1.76791	1.62796	3.02662	2.6009	2.48035	1.55133	1.05894	1.60243	1.85656	1.88477	2.46982	1.99497	2.41596	2.27467	3.68209	3.21958	2.56744	0.682379	0.982435	1.83343	1.61812	1.25638	1.62642	1.60076	1.91355	1.68067	3.4469	2.68127	3.44222	3.32212	3.31513	3.21296	1.75527	2.72763	1.05339
CG11453	2.91774	3.20951	2.88698	2.88493	2.88632	2.68571	2.085	1.86551	1.54055	2.60969	1.89437	2.09445	2.57721	2.45672	2.26927	3.06426	2.69484	1.95605	1.68727	1.81572	1.75361	1.99706	1.99188	2.51456	3.28778	2.934	2.80908	3.41931	3.45439	3.55175	2.69688	2.44629	2.68676	2.20358	2.7148	2.01113
Pros45	6.50368	6.50019	6.51932	6.72446	6.90741	6.75662	6.70454	6.70499	6.56735	6.96946	6.76554	6.87804	6.18605	6.24965	6.00524	6.21299	6.43091	6.22386	6.15128	6.25906	6.19904	6.21887	6.3011	6.29197	6.07229	6.08416	6.13063	6.19819	6.49427	6.32966	6.15067	6.13855	6.18351	6.16631	6.31427	6.32393
Tre1	3.23988	3.08817	3.32951	3.30089	3.18418	3.27083	3.18725	3.46583	3.31943	3.49657	3.34764	3.57871	2.88411	2.94118	2.88979	3.23269	2.85572	3.01907	3.24047	3.31259	3.02905	3.23553	3.07865	2.99271	3.16751	3.02462	2.97389	3.14857	3.08419	3.15178	3.26969	3.33707	3.25161	3.16924	3.1023	3.12835
Aats-ala	4.43819	4.50348	4.59939	4.70994	4.53371	4.80941	4.57256	4.68097	4.58025	4.82151	4.85132	4.82534	4.21751	4.35733	4.12908	4.33992	4.72036	4.37914	4.23468	4.24992	4.30439	4.29783	4.44489	4.49004	4.28479	4.31734	4.36594	4.54371	4.50393	4.46189	4.31205	4.38754	4.42804	4.46256	4.59946	4.52915
CG9418	2.68302	2.60729	2.7527	2.6539	2.78853	2.74872	2.62564	2.57241	2.63421	2.83838	2.84892	2.88464	2.52478	2.3667	2.34083	2.39968	2.45184	2.35444	2.28744	2.47436	2.34826	2.34717	2.41758	2.59838	2.5224	2.47929	2.39251	2.64772	2.44644	2.60285	2.50097	2.44327	2.51357	2.44914	2.43413	2.58103
CG3704	4.164	4.14493	4.21393	4.21038	4.44765	4.39794	4.17043	4.22401	4.28627	4.44927	4.40735	4.42007	3.82836	3.83596	3.72486	3.95551	4.17275	3.89045	3.94957	3.71323	3.81479	3.87393	3.85436	3.84212	3.59247	3.74969	3.6948	3.88188	3.99199	3.97319	3.67618	3.79924	3.73709	3.75931	3.76218	3.82185
Aats-his	3.96723	4.00541	4.06969	4.03543	4.13013	4.12324	4.13237	4.09383	3.95996	4.18657	4.21899	4.32669	3.64862	3.8801	3.67207	3.80538	4.09705	3.81997	3.72011	3.74815	3.82045	3.84306	3.84194	3.94879	3.68808	3.66932	3.67186	3.89103	4.02357	3.93991	3.7562	3.84098	3.83334	3.86637	3.91033	3.84582
nimC1	4.2271	4.07218	3.95901	4.39776	3.97501	4.65435	4.37592	4.25851	4.41952	3.11941	3.29775	3.87536	4.08102	4.39354	4.41405	4.47074	4.67587	4.21535	4.19314	4.35118	4.17655	3.40766	3.47749	3.55093	4.28423	4.29937	4.56444	4.31691	3.76024	4.2749	4.32855	4.17341	4.22582	3.69483	3.7522	3.5782
CG5704	3.80655	3.61052	3.86011	4.14793	4.04581	4.03498	3.82927	3.73845	3.81671	4.02818	3.79971	4.10203	3.71473	3.74212	3.78618	4.05501	3.56997	3.86896	3.21449	3.57116	3.57287	3.46862	3.42857	3.50803	3.51778	3.6697	3.41636	3.79275	3.89708	3.818	3.75518	3.72039	3.51404	3.40657	3.63406	3.48792
CG9799	3.00993	3.0999	3.0843	3.44258	2.9904	3.44625	3.39384	3.41572	3.34657	3.31546	3.47369	3.51332	3.0672	3.23345	3.20341	3.14486	3.26475	3.33289	3.14353	3.28751	3.29422	3.30532	3.42494	3.4596	2.89522	3.023	2.82999	3.10156	2.87278	3.08776	2.95207	2.99007	2.85032	2.88343	2.96023	3.10137
CG3376	5.00166	4.63082	5.13232	4.39399	3.79665	4.42318	3.81684	4.10761	3.8972	4.52984	5.35977	5.17208	4.38042	4.52515	4.32923	3.8296	3.61697	3.89223	3.73789	3.78748	3.87237	4.21537	4.4474	4.09152	4.67435	4.51344	4.57091	4.16475	3.92768	4.10677	3.84258	3.94205	4.15142	4.38543	4.78913	4.73829
CG10361	4.1311	4.26116	4.17079	3.91646	4.24835	4.03964	4.11953	4.33188	4.24181	4.38082	4.53438	4.33464	4.01663	4.0292	3.85624	4.07172	3.9695	4.23933	3.56506	3.47355	3.69492	3.85575	3.8893	3.68863	3.94386	4.30939	4.43712	4.25098	4.61649	4.53395	4.16073	3.8885	3.92844	4.23222	4.39942	4.49978
rumi	2.01714	1.80781	1.92938	2.1731	2.16308	2.07021	1.93081	1.76895	1.87284	1.83065	2.00719	1.96437	1.64612	1.9618	2.00906	2.08558	2.2044	1.91302	1.72731	1.91085	1.95812	2.09571	2.04808	2.02893	1.70251	1.68276	1.86973	1.96293	2.06508	2.2339	1.92688	1.89146	2.05125	1.97846	1.95221	1.94362
CG3775	4.92166	5.10619	5.14446	5.05678	4.81103	5.53362	5.70605	5.64241	5.59957	5.0116	5.22236	5.31928	4.77872	4.65229	4.82406	4.48867	4.63729	4.70544	4.66939	4.97985	5.00286	4.94247	5.01637	4.98257	4.93722	4.90744	4.98948	4.72743	4.76644	4.8147	5.04432	5.10046	5.08457	5.16538	5.29369	5.35539
Nle	3.03094	3.06156	3.01854	3.32198	3.64002	3.34548	3.33623	3.30105	3.14082	3.87887	3.53146	3.69668	2.99942	2.98418	3.04207	3.01582	3.49888	3.0646	2.9662	2.9287	2.97263	3.18872	3.22812	3.18782	2.83774	2.95819	2.78643	3.12584	3.40267	3.17545	2.86382	2.98221	2.89635	3.11469	3.23374	3.1789
CG15629	4.16647	4.15896	4.35877	4.40614	4.68375	4.49232	4.6085	4.49164	4.67275	4.06376	3.69389	4.14889	4.19832	4.31494	4.42665	4.26361	4.38322	4.29359	4.45646	4.42493	4.38917	4.03218	3.96918	3.76292	3.87968	4.01432	3.70553	4.24819	4.24305	4.4773	4.15095	4.10979	4.31244	3.80554	3.71344	3.68065
CG11893	4.59073	5.07564	5.22644	5.44708	5.5113	5.61021	4.99964	5.26067	5.38538	5.17462	5.01247	5.19411	4.68848	5.4504	4.3914	4.86795	4.09115	4.85167	4.77277	4.86657	4.04564	4.23443	4.43752	4.70667	5.07482	5.38253	5.12494	5.41318	5.38963	5.4942	5.22014	5.11952	5.5446	5.00105	4.9391	5.27319
CG1234	2.7077	2.84533	2.95572	3.10184	2.84487	3.1281	2.94998	2.98273	2.91306	3.24964	3.13889	3.24926	2.82888	2.81072	2.80402	2.76296	2.88027	3.04239	2.79998	2.82449	2.76049	2.90802	3.14379	3.1796	2.79094	2.82072	2.85338	3.0029	2.99957	3.10763	2.81168	2.77611	2.79742	3.04072	2.97953	3.05643
CR18854	7.34401	7.44488	7.46204	7.59085	7.59184	7.66701	7.46016	7.52275	7.39676	7.62441	7.60196	7.6624	7.0326	7.01251	6.8629	7.02527	7.08553	7.08153	6.82938	6.9844	6.91704	7.00687	7.10401	7.10571	6.98791	6.99498	6.99096	7.16645	7.21525	7.21851	7.01323	7.06573	7.11091	7.06921	7.18462	7.21417
CG7497	3.60627	3.6563	3.82456	3.49104	3.2478	3.46197	3.69214	3.76683	3.71473	3.06309	3.24335	3.32652	3.09758	3.30962	3.12286	3.32393	2.80439	3.20854	3.06099	3.40566	3.08548	2.36684	2.45439	2.49323	3.25767	3.34853	3.31309	3.21626	3.08132	3.12007	3.19513	3.04475	3.31904	3.05095	2.98831	2.73663
Trxr-1	7.43365	7.40118	7.41897	7.64034	7.73324	7.54866	7.67515	7.57148	7.5764	7.85975	7.65308	7.67547	6.96654	7.16334	6.95624	7.03934	7.14164	6.98198	7.11159	7.02733	7.11827	7.04883	7.0627	6.98659	7.00191	6.95848	7.04653	7.01266	7.24908	7.18446	7.05669	7.23926	7.01245	7.09753	7.13222	7.0316
CG10641	5.03372	5.14836	5.10384	5.0686	4.53948	5.11183	4.77089	4.85785	4.81647	4.51167	4.77788	4.84557	5.07842	5.15588	5.1588	4.99183	4.98937	4.99866	4.66164	4.76093	4.7238	4.70066	4.69335	4.6829	5.1639	5.18826	5.12759	5.0104	4.61672	4.95285	4.8487	4.7196	4.87349	4.69761	4.802	4.87407
CSN1b	4.86456	4.92413	4.98027	5.15191	5.04458	5.16892	4.99756	4.98713	4.96389	5.08536	5.07131	5.11981	4.65057	4.5513	4.49564	4.56153	4.65174	4.64206	4.48562	4.68184	4.62247	4.62885	4.6677	4.70337	4.34775	4.35126	4.34948	4.56269	4.62715	4.50487	4.37524	4.34478	4.41165	4.51912	4.43448	4.52165
CheA87a	5.58878	4.25079	4.41423	6.52818	7.0139	5.75563	4.63921	3.68556	4.21167	6.39175	5.13615	5.73906	5.08914	5.05885	5.15261	7.04144	5.97951	5.71185	0.767063	1.2854	4.70588	4.10315	3.79562	4.58127	4.85199	4.76903	4.81495	6.53924	6.29566	6.32219	6.57378	6.16742	6.13416	4.21663	5.89381	3.15464
CG10463	2.58985	2.61512	2.73548	2.9752	2.97025	2.87712	2.7168	2.77635	2.79238	2.97067	3.03104	3.0554	2.53387	2.81972	2.55059	2.64272	2.76436	2.72168	2.60656	2.76457	2.7247	2.78672	2.79465	2.84545	2.7544	2.73636	2.70947	2.79096	2.69308	2.66209	2.45635	2.69842	2.32859	2.87395	2.82816	2.95655
CG5285	1.18722	1.3081	1.25595	1.50314	1.38745	1.38124	1.06081	1.48994	1.43543	0.97498	1.11523	1.07477	1.25256	1.03182	1.18144	1.35415	1.18742	1.54907	1.10275	0.891431	1.20485	1.54737	1.37461	1.21082	1.39307	1.44858	1.4354	1.32113	1.62511	1.45412	1.36783	1.19883	1.29208	1.45958	1.46891	1.53698
CG9630	2.33183	2.59324	2.45723	2.77421	3.19769	2.84649	2.71721	2.64679	2.45086	3.08128	2.90307	2.92656	2.56545	2.65988	2.51497	2.65451	2.81003	2.56448	2.49295	2.44316	2.48761	2.49797	2.69109	2.69054	2.51418	2.62085	2.63197	2.72139	2.87503	2.82771	2.50631	2.39799	2.38415	2.58792	2.79048	2.71026
CG8326	2.82905	2.59804	2.61969	2.7699	3.30933	2.94483	2.95176	2.87906	2.85304	3.36783	2.99082	2.95451	2.4032	2.42271	2.43979	2.71709	2.91124	2.55052	2.47706	2.39938	2.36059	2.47069	2.66384	2.71727	2.56033	2.84903	2.73041	2.76043	3.03149	2.89288	2.77121	2.72456	2.53376	2.86826	2.74597	2.85134
CG8258	5.26935	5.32604	5.46717	5.55534	5.53088	5.73212	5.56606	5.63976	5.45892	5.96179	5.78343	5.87105	5.12889	5.23647	5.08985	5.21165	5.36182	5.18068	5.30547	5.29564	5.31613	5.22605	5.32812	5.44867	5.073	5.01172	5.06146	5.27543	5.39928	5.37943	5.28666	5.31399	5.29495	5.25033	5.35468	5.3488
snoRNA:185	-1	0.00656561	-1	0.713731	2.11259	0.366524	-1	-0.364124	-1	0.928486	-1	0.711102	0.0140921	-1	1.90342	-0.266868	-0.215916	0.688771	-1	0.343487	0.206611	0.267967	0.464849	-1	3.10285	-1	0.33641	-1	0.374582	0.841078	-1	-1	-1	0.357206	-1	0.0806647
CG1092	5.057	5.08913	5.03486	5.18542	5.66242	5.41108	5.38075	5.3978	5.33881	4.88374	4.61134	4.85279	4.73707	4.74454	4.86013	5.02299	4.90606	4.95637	4.63997	4.8616	4.79033	4.31013	4.27347	4.20458	4.86467	4.92426	4.83668	4.95904	5.01079	4.98578	5.04926	4.81194	4.96042	4.47757	4.63832	4.61287
CG30151	5.12136	4.89843	5.05897	5.36552	5.51532	5.46136	5.16717	5.25336	5.18058	5.33683	5.28201	5.28452	4.79452	4.55388	4.74378	4.85619	4.86881	4.91888	4.75622	4.92071	4.97913	4.51381	4.73302	4.50089	4.43141	4.5149	4.5258	4.82472	5.00265	4.86796	4.7958	4.68408	4.90428	4.55157	4.42696	4.71419
LamC	5.06697	4.96223	5.13942	5.14811	5.20535	5.11494	4.98998	5.01873	4.92843	5.2704	5.08362	5.29502	4.64735	4.85528	4.82005	4.7867	4.8777	4.77358	4.51183	4.7485	4.57963	4.50263	4.50143	4.58392	4.67771	4.70599	4.71352	4.88948	4.96373	5.046	4.68424	4.80928	4.75256	4.46989	4.67984	4.52452
Tsp42En	1.8053	1.79123	1.74147	1.89797	2.1749	2.04367	1.73491	1.83774	1.5105	2.41043	2.20067	2.24117	1.55103	1.65601	1.55464	1.8084	1.71544	1.70841	1.61031	1.4921	1.546	1.73093	1.61983	1.72593	1.31889	1.53362	1.4657	1.55331	1.63686	1.57562	1.44264	1.58379	1.48447	1.21412	1.62453	1.36672
CG13126	3.28419	3.38977	3.38389	3.64415	3.71025	3.59444	3.41963	3.36846	3.27838	3.6047	3.50259	3.59022	3.2366	3.26566	3.03327	3.21274	3.35685	3.2455	3.15091	3.0929	3.0649	3.2878	3.16847	3.25685	3.34358	3.32847	3.22887	3.38179	3.41347	3.40557	3.11101	3.19756	3.05123	3.35399	3.3803	3.36563
Syx4	3.02334	3.25346	3.26801	2.98524	3.64002	3.35805	2.52803	2.82143	2.73946	3.11171	2.75479	2.81579	3.07883	3.17457	2.9757	3.00229	3.11946	3.02818	2.72126	2.68111	2.57315	2.44958	2.6488	2.56236	3.08767	3.0328	2.96601	3.01029	3.42206	3.00403	2.87892	2.63503	2.82242	2.49882	2.40909	2.55645
CG8116	4.05451	4.01879	4.01411	4.12525	4.3606	4.11028	4.16991	4.21274	4.10894	4.34452	4.16456	4.24309	3.61415	3.51825	3.1506	3.3902	2.69592	3.57915	3.4708	3.51617	3.47241	3.68494	3.60985	3.7589	3.62201	3.8844	3.78496	3.76406	3.98925	3.82098	3.84786	3.69658	3.71999	3.89142	3.8844	4.01017
EndoGI	4.97283	4.97974	5.03095	5.14562	5.37554	5.31084	5.04995	5.0854	5.10667	5.47743	5.21214	5.59343	4.75159	4.79955	4.6257	4.8103	5.07173	4.84252	4.71107	4.8179	4.78538	4.79439	4.76756	4.76936	4.63138	4.60142	4.54089	4.74417	4.94791	4.79556	4.72228	4.80292	4.59306	4.67724	4.71612	4.78446
Snx6	5.21399	5.19715	5.35163	5.45318	5.36863	5.61289	5.25899	5.49129	5.28941	5.39645	5.42205	5.50335	4.86609	5.03482	4.91339	5.08335	5.03351	5.03704	4.85537	4.93299	4.94207	4.84294	5.08842	5.10249	4.94013	5.0115	4.98407	5.23533	5.17627	5.22739	5.11501	5.062	5.13105	4.98666	5.18192	5.10416
CG10103	5.31022	5.15388	5.46431	5.46855	5.42131	5.68106	5.2562	5.3945	5.32602	5.54584	5.61843	5.68599	4.92623	5.11765	4.86213	5.06972	4.99582	5.14718	4.98513	4.99944	4.99825	4.9803	5.02465	4.96035	4.86298	4.91659	4.86261	5.0814	5.18456	5.09356	5.07668	5.16782	5.09885	4.95274	4.99512	5.009
CG5525	4.73709	4.70896	4.88081	4.97585	4.97939	5.19504	4.88798	5.01013	4.76534	5.5486	5.23133	5.27039	4.51956	4.59989	4.46424	4.56298	4.77506	4.57937	4.60985	4.57967	4.61825	4.64205	4.78855	4.87989	4.65015	4.54909	4.68171	4.95791	5.05625	4.97066	4.73413	4.73439	4.78228	4.77158	4.86524	4.92694
CG2310	2.8275	2.96969	3.13672	3.28336	3.07572	3.42318	3.10664	3.32414	3.09732	3.59767	3.35071	3.56756	2.55096	2.65923	2.74833	2.8635	2.70559	2.93514	2.99305	2.50017	2.8143	3.00163	2.61368	2.79948	3.09326	3.12683	2.98394	3.13226	3.47475	3.44667	3.30171	3.34482	3.22791	2.95177	3.40934	3.31408
CG6034	0.562286	1.48626	1.285	1.20029	1.24445	1.0185	1.41421	1.16449	0.950943	0.353085	-0.384862	0.0526999	0.347581	1.09361	0.709472	1.12636	0.81441	0.537067	0.182366	0.279693	0.223624	-0.325095	-0.232238	-0.0194977	0.881378	1.27034	0.913195	1.04874	0.612961	1.04044	0.996345	0.82349	1.03443	0.649576	0.638464	-0.355572
CG5181	2.92478	2.95564	3.01351	3.22856	3.433	3.26393	3.12835	3.13642	3.24293	3.47195	3.08797	3.32255	2.80297	2.93935	2.74099	3.05844	2.90057	3.09761	2.61927	2.66317	2.84322	2.8089	2.9976	3.08068	2.69514	2.93296	2.56103	2.89212	3.04158	3.13559	2.6877	2.91871	2.76807	2.96132	2.94472	2.82367
CG9246	3.06106	3.13167	3.12651	3.32191	3.15054	3.39299	3.15601	3.25317	3.15039	3.36721	3.46074	3.38832	2.99778	2.92945	2.8952	2.89883	3.11848	3.01401	2.78049	2.92432	2.87366	3.0444	3.22929	3.27518	2.97111	2.98879	2.90675	3.07579	3.02212	3.07736	2.95255	2.82147	2.90743	3.15245	3.16077	3.24677
CG33107	2.9695	2.9945	2.9641	3.29119	3.50475	3.44217	3.00679	3.16594	3.00178	3.66786	3.07448	3.12119	2.82892	2.50781	2.63672	2.89096	2.84876	2.61424	2.65906	2.81882	2.93084	2.72336	2.83806	2.86752	2.73215	2.90015	2.75746	2.90203	3.14995	3.11725	2.88635	2.82953	2.84214	2.96811	2.87209	2.93185
CR43310	0.897736	2.09313	2.00205	0.338267	1.32602	0.987698	0.366793	1.10134	1.12121	3.73636	1.51697	1.31742	1.06508	1.0788	0.631596	0.270555	-0.713119	0.0711654	0.0733888	0.19438	0.134636	-0.852987	0.653323	1.14169	0.69658	0.785367	1.16531	1.07656	1.78774	0.124655	0.235682	0.261181	0.956326	0.705148	0.47442	1.07986
CG7272	6.44121	6.59712	6.57818	6.73825	6.95417	6.74291	6.73616	6.80547	6.84559	6.65278	6.26233	6.51276	6.30923	6.46702	6.20224	6.5072	6.25712	6.5396	5.9505	6.09744	6.08463	6.14532	6.13294	5.96731	6.34073	6.42287	6.293	6.69296	6.77953	6.83071	6.37912	6.15493	6.32097	6.2234	6.39732	6.3411
Wnt6	4.31771	4.36725	4.23913	4.23102	4.29591	4.1625	4.0565	4.05402	4.10113	4.21059	3.98467	4.14853	3.55196	3.79374	3.69646	3.53016	3.85054	3.3763	3.33394	3.53722	3.5794	3.64298	3.35336	3.57067	3.51669	3.51535	3.32041	3.33144	3.20887	3.44158	3.6565	3.46909	3.29207	3.45878	3.54947	3.40041
CG14406	0.470225	0.921272	0.626264	0.815316	0.697187	1.02873	0.853604	1.24645	1.27905	0.975037	1.40761	1.23374	0.0655781	0.57185	0.342936	1.43915	0.508727	0.636356	1.31031	1.16568	0.73846	0.0321577	0.314898	0.489857	0.388146	0.602918	0.64987	1.42067	1.18475	1.29411	1.98184	1.06565	1.68166	0.9863	0.877412	1.47279
sqh	6.88736	6.95862	7.09013	7.11923	7.32571	7.31798	7.07227	7.13139	6.96724	7.42674	7.26718	7.51049	6.55294	6.74543	6.60101	6.67635	6.45545	6.705	6.58225	6.59763	6.5934	6.6944	6.66536	6.61984	6.51162	6.50968	6.53339	6.73646	6.86095	6.90638	6.65007	6.72278	6.67967	6.67379	6.7432	6.78486
CG7442	2.33437	2.57781	2.58819	2.56392	2.50565	2.77023	2.76295	2.97925	3.02474	3.00038	3.01559	2.92621	2.53405	2.45636	2.04362	2.34892	2.38759	2.51625	2.56697	2.52169	2.58017	2.27963	2.32317	2.5542	2.5077	2.53508	2.58946	2.83364	2.84562	2.69944	2.65555	2.62648	2.77116	2.76851	2.70164	2.58324
CG15096	7.22808	7.46495	7.56978	6.7517	6.97711	6.83886	6.88597	7.09256	7.24014	7.18753	6.92269	7.13328	6.49094	6.39481	6.10685	6.03323	5.63964	5.91898	5.55575	5.84884	5.83201	6.81628	7.1141	6.72466	7.09612	6.93442	7.16432	6.52568	6.66132	6.50212	6.22332	6.1791	6.28701	7.16544	7.20355	7.28066
CG32075	2.28308	2.09859	2.11441	2.39495	2.5704	2.53404	2.33239	2.32288	2.31403	2.53686	2.55087	2.50644	2.41507	2.48542	2.40552	2.41037	2.39035	2.33446	2.39693	2.27401	2.33818	2.38526	2.49045	2.6009	2.1161	2.25559	2.21879	2.44056	2.19944	2.24813	2.20512	2.19279	2.10922	2.21114	2.15987	2.3778
CG4194	0.0864448	-0.247878	0.00119599	0.0219918	0.189483	-0.0551507	-0.366638	-0.468803	-0.282469	0.0893272	0.102666	0.0797637	0.105895	0.486765	0.480615	0.0457429	-0.213156	0.209429	0.26954	0.303008	0.111452	0.0433357	0.147804	0.0390007	0.00709093	0.0391229	0.0153958	0.0863214	0.222496	0.253245	-0.018438	-0.108361	0.336025	0.0142561	-0.140463	-0.142358
CG18213	0.757718	0.737334	0.786601	0.839318	0.311656	1.00492	0.509241	0.615469	0.593897	0.669528	0.795546	0.800738	0.29867	0.629814	0.508132	0.239779	0.466144	0.402277	0.189539	0.227011	0.263422	0.314105	0.676942	0.82903	0.339348	-0.0345948	0.355384	0.51547	0.00988148	0.285833	0.338403	0.330491	0.299547	0.574548	0.322087	0.659694
p16-ARC	5.15506	5.30526	5.50719	5.61179	6.05214	5.91942	5.79849	5.30665	5.33329	6.31356	5.64976	5.9192	4.49924	4.49513	4.31374	4.57882	4.64195	4.68259	4.37897	4.59334	4.44028	4.65386	4.69819	4.81269	4.44557	4.58351	4.38817	4.73681	5.31061	4.83888	4.58247	4.59026	4.59608	4.62701	4.73333	4.68653
IP3K1	3.78625	3.96376	4.06093	3.88437	3.80304	3.77862	3.71543	3.62238	3.59758	4.31311	3.97221	3.90454	3.93714	4.09117	3.782	3.72706	3.89124	3.58688	3.54568	3.81655	3.65452	3.67256	3.64565	3.72296	3.65372	3.64196	3.71852	3.68223	3.76558	3.65708	3.63142	3.55973	3.70974	3.54147	3.68484	3.60209
Tret1-2	1.43362	1.31771	1.95024	1.40886	1.23706	1.51983	0.801827	0.883438	1.17003	1.39784	1.49116	1.38256	0.484864	0.844642	0.319078	0.25911	0.532654	0.199004	0.119869	0.360621	0.182836	0.257252	1.10607	0.980346	1.45327	1.24477	1.40479	0.961958	1.27807	1.30962	0.72954	0.9494	0.920912	0.918719	0.698945	0.931841
mbm	2.01974	2.01513	2.11859	2.42494	2.55894	2.46145	2.16446	2.25434	2.22005	2.49631	2.53095	2.29335	2.18633	1.99907	2.06705	1.89291	2.06531	2.21914	1.9533	1.8589	1.94422	2.06433	2.3785	2.43187	2.12381	2.11836	2.08027	2.06626	2.43387	2.41699	1.99244	2.11313	2.12188	2.31519	2.39147	2.31193
l(2)efl	8.12456	8.06326	8.1124	8.3729	9.24275	8.26665	8.43085	8.43261	8.70511	8.99736	8.66669	8.98071	7.84223	7.91317	7.81858	8.0708	8.22459	7.95273	8.08163	8.11207	8.13418	7.99099	7.87325	8.06846	7.29207	7.21631	7.11032	7.62938	8.08054	7.7893	7.78328	8.04173	7.69555	7.58864	7.75947	7.64414
CG13795	4.988	4.7888	4.95139	5.1849	4.96428	5.2911	4.92446	5.18847	4.96782	4.50553	4.83858	4.7294	4.33176	4.46903	4.43395	4.40475	4.07343	4.59365	4.14923	4.47255	4.55473	4.05873	4.18746	3.93907	4.60583	4.6057	4.34795	4.64262	4.67985	4.80523	4.70553	4.87388	4.85768	4.27079	4.42776	4.58979
CG5697	2.53229	2.73193	2.72973	2.15839	2.14764	2.19393	2.17811	2.36321	2.40596	4.13742	3.04873	2.63654	2.71175	2.36195	1.34014	1.48875	1.52293	1.50539	1.11517	1.241	1.06441	1.26481	2.19635	2.17145	1.38077	1.74726	2.59761	1.50421	2.59641	1.35778	1.36311	1.34694	2.10388	1.52191	1.85853	2.12691
CG5618	6.49852	6.53	6.58563	5.80038	6.19406	5.90959	6.08045	6.07973	6.13181	6.33524	5.77402	6.08334	5.85014	5.84049	6.06929	5.21709	5.68006	5.21785	5.12946	5.24102	5.15431	5.78596	5.63266	5.4587	6.5208	6.63296	6.46374	5.75737	5.95156	5.98351	5.7735	5.69864	5.7409	6.25692	6.06989	6.28955
Dbp73D	1.86434	1.82381	2.02881	2.03134	2.17992	2.26212	1.86172	2.05946	2.08075	2.44	2.31009	2.24258	1.84688	1.74523	1.90998	1.83467	1.99546	1.98571	1.62438	1.76555	1.77401	1.77723	2.10323	2.22383	1.84357	1.80389	1.67065	1.87306	2.13098	1.82531	1.69718	1.45529	1.6672	2.11452	2.10267	2.10779
CG3011	7.18759	6.90899	7.18675	7.05691	7.44599	6.76403	6.72091	7.18087	6.96187	7.47378	7.84579	7.43239	6.55615	6.50421	6.33274	6.45695	6.45648	6.6267	6.3928	6.51919	6.65501	6.11379	6.22944	5.99341	6.54844	6.38092	6.41929	6.55361	7.18636	6.66391	6.75027	6.99151	6.89135	6.44051	6.67256	6.51356
CG5849	2.83564	3.08055	3.20518	2.55855	2.26653	2.99106	2.4529	2.63971	2.44565	2.43147	2.788	2.88593	2.59703	2.3787	2.45483	2.1537	2.2514	2.19255	1.91439	2.21127	1.98056	2.16012	2.40043	2.47831	2.79983	2.75168	2.80724	2.46192	2.1459	2.35775	2.3836	2.34212	2.37041	2.52532	2.60119	2.48432
Cctgamma	4.71887	4.82282	4.98944	5.02381	5.12295	5.23568	5.02952	5.22372	4.90677	5.61241	5.37673	5.45938	4.57108	4.64415	4.55502	4.58179	4.95194	4.63085	4.56912	4.6964	4.68675	4.66339	4.7884	4.89569	4.43067	4.44494	4.46283	4.71193	4.86863	4.78349	4.6085	4.70365	4.62158	4.59466	4.77514	4.68768
CG43348	2.7777	2.21537	3.53761	4.84272	4.15017	4.6645	3.37089	3.69159	1.71832	4.12988	3.62309	3.81105	1.85003	2.39381	1.24444	1.58767	0.584396	2.25044	1.62858	1.64389	1.39636	1.17272	2.31247	2.35275	1.09024	0.901634	0.570708	2.24558	2.92693	1.99845	0.91092	0.362535	0.908834	1.37292	0.953455	0.836886
CG42526	1.71672	1.70155	1.56963	2.21766	2.16298	2.20503	2.16901	1.88485	2.12025	2.13091	1.93651	1.9062	1.1215	1.20495	1.44202	1.31209	1.57772	1.46857	1.28304	1.39513	1.46773	1.44224	1.29955	1.49206	1.28244	1.55832	1.46782	1.57544	1.312	1.59391	1.47599	1.23856	1.22713	1.57834	1.26154	1.60067
Ipod	0.717564	0.945651	1.29059	0.969521	1.07939	0.926204	1.49913	1.33486	1.41899	1.67024	1.50576	1.25601	0.532648	0.375544	-0.0975758	0.824226	0.625408	0.75943	0.159447	0.629303	0.699817	0.486051	0.693073	0.500406	-0.177187	-0.180608	-0.473412	0.157265	0.328646	0.119175	-0.0483941	0.282247	0.309282	0.0673261	0.241743	0.104432
insv	3.24172	3.03551	3.13757	3.41661	3.6824	3.6593	3.57588	3.22134	3.46812	3.45261	3.25477	3.27947	3.18779	3.22499	2.86329	3.19416	3.04506	3.42921	3.44473	3.38453	3.23107	3.06213	2.9547	3.28594	2.83949	2.93237	2.74012	3.29809	3.55099	3.37641	2.86433	2.96612	2.96145	2.54756	2.45579	2.96562
NtR	5.07916	5.049	5.12936	5.33109	5.35801	5.51919	5.33006	5.61727	5.4701	4.59506	4.1522	4.90535	4.16607	4.6866	4.64065	4.63067	4.77091	4.6393	4.63879	4.71511	4.48095	3.75396	3.81099	3.83503	4.97917	5.07223	5.01058	5.30199	5.06727	5.27836	5.28108	5.14593	5.36508	4.57964	4.88659	4.41787
CG7267	7.83674	7.63949	7.89422	7.92222	8.10994	7.97285	7.48159	7.70561	7.46838	7.71357	7.4361	7.78267	7.45983	7.65924	7.55626	7.53103	7.43748	7.54535	7.24885	7.19331	7.24805	6.91892	6.89076	6.8371	7.2312	7.31283	7.28908	7.35685	7.47453	7.57793	7.03721	7.06755	7.04226	6.58498	6.95254	6.8383
CG10916	3.49871	3.55048	3.75298	3.78455	3.80998	3.84434	3.42832	3.63869	3.58837	3.85208	3.80851	4.01562	3.00147	3.22703	2.95736	3.33006	3.27187	3.23351	2.97013	2.95063	3.0421	3.27651	3.3207	3.23521	3.1403	3.15857	3.21591	3.37959	3.4736	3.59662	3.234	3.27108	3.16854	3.34116	3.35837	3.49428
CG11180	2.54973	2.71975	2.66402	2.93471	2.80924	2.96401	2.79408	2.79518	2.68664	3.05189	3.10504	2.93244	2.36773	2.43892	2.65852	2.50814	2.88402	2.45891	2.13991	2.10283	2.38569	2.62632	2.60514	2.55115	2.47692	2.55911	2.61326	2.73777	2.65666	2.64186	2.51604	2.30588	2.50058	2.79322	2.69001	2.7401
TwdlE	-0.75763	-0.72938	-0.677015	-0.64418	-0.53292	-0.483664	-0.678889	-0.653136	-0.621745	-0.70189	-0.819267	-0.619018	-0.677876	-0.662683	-0.778849	-0.564854	-0.626779	-0.704462	-0.896867	-0.86997	-0.90062	-0.80596	-0.828828	-0.919684	-0.760637	-0.704451	-0.456625	-0.763876	-0.546754	-0.682191	-0.570107	-0.688462	-0.593404	-0.786283	-0.630672	-0.625524
CG12116	7.18459	7.20959	7.32176	6.59384	7.4566	6.60714	5.77613	5.76346	5.99212	6.68506	6.02975	6.26555	7.00621	6.89531	7.03485	5.76929	6.21725	5.89638	5.43833	5.3083	5.41968	5.69099	5.66534	5.60516	7.03997	7.01635	7.09669	6.39415	7.07207	6.70493	5.75379	5.56423	5.60592	5.52111	5.40275	5.57826
CG33120	4.46597	4.46952	4.5267	4.71371	4.317	4.79264	4.70129	4.75798	4.7474	4.29664	4.43959	4.40714	4.05132	4.0455	4.05511	3.9474	3.40306	4.12239	3.71798	4.16286	4.04545	3.91407	4.19986	4.0224	4.32476	4.29494	4.21588	4.08723	3.9124	4.12144	4.23159	4.15681	4.30549	4.19513	4.36512	4.38556
CG4497	4.27966	4.31531	4.2601	4.55594	4.0389	4.80751	4.58122	4.45359	4.49362	4.66893	4.6766	4.80022	3.85538	4.12214	3.90162	4.38343	3.7183	4.19938	3.87948	3.94291	4.00961	4.14694	4.02779	4.05161	3.46187	3.61191	3.3053	3.49443	2.98564	3.42199	3.36151	3.45943	3.30236	3.51474	3.53705	3.70057
CG3239	4.65858	4.43142	4.58229	4.69397	4.69771	4.85355	4.65926	4.69832	4.70816	4.39898	4.49774	4.5743	3.84413	3.99889	3.64645	3.79716	3.85376	4.09599	3.89896	4.01108	3.88752	3.93037	3.97322	3.74977	4.09565	4.15895	4.19347	4.19683	4.41429	4.32035	4.17246	4.33259	4.28223	4.36278	4.34066	4.52903
Spn4	5.52429	5.41434	5.54774	5.57912	5.76292	5.67662	5.44144	5.64879	5.50929	5.83612	5.80167	5.84722	4.88268	5.00232	4.84751	4.91214	4.57547	4.86447	4.6356	4.85714	4.77977	4.78399	4.90662	4.75043	4.87153	4.89354	4.8278	4.96287	5.07591	5.03888	4.97525	5.08307	5.00151	4.88011	5.10362	5.01191
lectin-28C	6.81583	6.67002	7.0985	7.07114	7.35056	7.401	6.76417	6.97995	6.8201	6.65619	6.50533	6.78195	5.67835	5.47878	5.58452	5.45611	5.05818	5.39069	5.00948	5.04577	5.22787	4.78225	4.88655	4.50489	6.59549	6.94505	6.65131	6.76752	7.07109	6.87642	6.90768	6.5093	6.95674	6.35697	6.35891	6.2605
CG5707	5.30116	5.4732	5.40794	5.67918	5.92346	5.62581	5.93147	5.8774	5.87615	5.90402	5.53515	5.61402	5.07828	5.20714	4.92274	5.34337	5.29173	5.28492	5.12842	5.05856	4.96912	5.03212	5.17634	5.12576	4.83627	4.85896	4.98629	5.28106	5.57468	5.46433	4.92085	4.87091	5.10047	5.24679	5.27872	5.3207
Obp83ef	3.23988	3.30789	3.6978	3.34598	3.58582	3.75674	3.76377	3.69224	3.55409	3.06469	3.01845	3.24069	2.60756	2.8162	2.67642	2.43931	3.00023	2.62477	2.50529	2.37651	2.39401	3.15587	3.37083	3.13054	3.05335	3.15118	2.93808	2.86735	3.38504	2.95746	2.77659	2.74609	2.65158	3.50488	3.3546	3.65643
CG2909	2.49704	3.05501	3.17457	3.04968	2.97143	3.03828	2.57687	2.70225	2.49691	3.04013	3.05984	3.20656	2.09975	2.25205	2.07001	2.24811	2.50219	2.22481	2.04189	1.92609	2.01259	2.0316	2.20041	2.39072	2.14925	2.07756	2.23433	2.19283	2.2776	2.1165	2.13031	2.025	1.96992	2.0532	2.0347	2.18567
AttD	-1	-0.846583	-0.0666881	-0.733591	-0.537425	0.688435	-0.374953	-0.382959	-0.816234	0.336612	0.461481	1.43958	-0.894886	1.62852	-0.621164	-0.930864	1.12816	-0.68124	-1	-0.772303	-1	-0.790142	-0.782019	-0.813036	-0.631749	-0.59888	-1	-0.0581722	-0.64893	-0.287931	-0.40604	-0.866318	-0.897321	-0.450979	-0.176876	-0.232331
Fer2LCH	9.72475	9.81373	9.89737	10.1851	10.2942	10.243	10.0207	10.0159	10.0161	10.4358	10.0644	10.3459	9.22441	9.42251	9.23459	9.22788	8.97367	9.41596	9.20683	9.34857	9.28632	9.22667	9.26438	9.34189	9.19809	9.42442	9.36836	9.41947	9.65893	9.4429	9.187	9.55744	9.28429	9.35281	9.4107	9.48364
CG32698	4.38224	4.20945	4.30215	4.55363	4.2509	4.69091	4.81254	4.70699	4.81743	4.05698	4.33069	4.31758	3.96505	3.9714	3.86413	4.23724	4.31184	4.29302	4.03027	4.19727	4.17309	3.92781	4.08688	3.92956	3.20844	3.01881	2.8249	3.35979	2.94847	2.96168	3.14455	3.24593	3.41202	3.41112	3.30591	3.34815
CG8083	1.85398	2.16362	2.09777	2.12007	2.10848	2.24905	2.2512	2.36489	2.48286	2.5824	1.8843	2.04442	1.82834	2.05647	1.9286	1.95792	1.79308	1.82567	1.98182	1.98864	1.93357	1.67359	1.95176	2.07239	1.86628	2.05555	1.67423	1.85546	1.87617	1.94731	1.93584	1.77064	2.06978	2.04088	2.08918	1.97764
ninaD	3.99364	3.99361	3.98022	4.0568	4.14748	4.11967	4.46714	4.31979	4.47799	6.31306	3.53522	3.82781	4.00244	5.31897	2.25677	2.68357	3.40672	3.13105	2.6626	2.00996	1.8269	2.31858	1.83304	3.27976	3.36993	3.9961	3.65563	4.57239	4.78331	4.32668	3.29631	3.09203	3.92913	3.55668	4.12745	3.59558
CG3106	-0.450785	-0.382806	-0.198829	-0.344722	-0.293852	-0.350531	0.204054	0.199655	0.301422	3.79432	-0.283737	-0.297634	-0.573114	-0.679685	-0.898397	-0.325203	-0.47506	-0.414407	-0.75683	-0.240975	-0.395723	-0.55153	-0.570493	2.87157	-0.820516	-0.884373	-0.843656	-0.79355	-0.0495961	-0.69831	-0.792466	-0.89738	-0.832355	-0.925844	-0.785099	-0.912189
CG14495	2.32815	2.87871	2.91121	2.93887	3.19319	3.52342	3.09125	2.77857	2.60719	3.54533	3.2228	3.02338	1.70509	2.18475	1.64723	1.52046	1.75142	2.24266	2.00312	1.82896	1.69911	1.79938	1.97186	2.40001	1.79117	1.84867	2.07743	2.6389	2.30547	2.38354	1.84434	1.89677	2.11134	2.78268	2.62334	2.90825
CG18179	0.655065	0.494754	0.431413	0.988901	1.65978	0.859089	2.24471	2.85608	2.88062	1.94168	1.08734	1.08227	-0.562211	-0.767926	-0.859294	-0.725792	-0.814856	-0.682666	-1	-0.210018	-0.587765	0.250897	-0.102784	-0.019191	-0.276649	-0.445518	-0.745595	-0.605832	-0.379809	-0.228079	-0.264965	-0.778913	-0.411868	-0.160106	-0.202517	0.671368
CG34227	4.4104	4.48424	4.68167	3.81987	5.40431	3.89533	3.63355	4.06997	4.09238	4.61685	5.20188	4.57333	1.47211	1.21331	0.717057	0.594247	0.395501	0.759551	-0.22069	0.741725	0.250156	0.857641	1.08087	0.707647	3.92371	2.96819	2.42002	3.39682	3.3398	2.88817	1.4526	3.09796	1.10953	2.92597	3.11561	2.96415
Ir52c	-0.714647	-0.812543	-0.933914	-0.46805	-0.66692	-0.341192	-0.823175	-0.860472	-0.960161	-0.574516	-0.798885	-0.533058	-0.791137	-0.846234	-0.443799	0.0371942	-0.192582	-0.389666	-1	-0.839779	-0.585277	-0.824844	-0.702984	-0.590782	-0.405984	-0.598491	-0.575871	-0.185014	-0.475881	-0.248144	-0.220614	-0.321619	-0.342136	-0.777152	-0.477938	-0.859602
Ir41a	-0.402717	-0.480123	-0.347806	-0.443682	-0.576655	-0.360335	-0.644351	-0.619694	-0.467463	-0.0651963	-0.37908	-0.290284	-0.784969	-0.821293	-0.934504	-0.844403	-0.88527	-0.767002	-0.823874	-0.661525	-0.846246	-0.9152	-0.447437	0.0773364	-0.846278	-0.808889	-0.87908	-0.523143	-0.567021	-0.68183	-0.685824	-0.821899	-0.789772	-0.582365	-0.823516	-0.419532
Cpr92A	-1	-1	-1	-0.967879	-0.883736	-0.857378	-0.957218	-0.923178	-0.936164	-0.498492	-0.835406	-0.707745	-0.765875	-0.935901	-1	-0.112398	-0.807698	-0.780053	-0.818319	-0.844414	-0.880842	-0.768795	-0.479396	-0.523167	-0.965488	-0.83393	-0.735996	-0.794163	-0.442347	-0.939945	-0.916108	-0.824523	-0.683086	-0.842091	-0.954525	-1
CG14147	-1	-1	-1	-0.821341	-1	-0.946155	-0.765816	-0.785722	-0.820548	-0.81702	-0.917339	-0.941906	-0.75605	-0.819836	-1	-0.868114	-0.79018	-0.784976	-1	-0.921984	-0.911831	-1	-0.636819	-0.952144	-1	-1	-0.897693	-0.875941	-0.701046	-0.912915	-0.731554	-0.93328	-1	-0.641371	-0.870712	-0.94301
CG7906	-0.898553	-0.970666	-0.830202	-1	-1	-1	-0.964632	-1	-0.896188	-0.703087	-0.907206	-0.842018	-0.970363	-0.946941	-0.95318	-0.924234	-1	-1	-0.947741	-1	-0.786196	-0.880984	-0.974381	-0.869079	-1	-0.929201	-1	-0.894494	-0.642716	-0.950301	-0.95328	-1	-0.783323	-1	-0.890018	-0.787276
WRNexo	-0.629375	-0.419323	-0.386369	-0.237276	-0.450332	-0.243812	-0.634548	-0.450677	-0.584972	0.109042	0.109369	-0.14677	-0.732172	-0.776743	-0.414034	-0.456304	-0.366311	-0.595564	-0.700502	-0.88377	-0.65562	-0.859287	-0.599278	-0.195186	-0.450303	-0.707557	-0.565567	-0.39617	-0.412943	-0.572947	-0.64455	-0.691719	-0.554278	-0.704561	-0.722205	-0.551064
CG33557	-0.851222	-0.756598	-1	-0.313811	-0.215628	-0.404437	-0.710694	-0.656316	-0.584495	-0.250248	-0.518437	-0.728479	-0.913355	-0.25985	-0.330752	-0.355835	-0.0260149	-0.580461	-0.849427	-0.447404	-0.545259	-0.575667	-0.333013	-0.518062	-0.76291	-0.621474	-1	-0.705717	-0.528237	-0.393428	-0.423916	-0.601582	-0.915374	-0.749484	-0.694034	-0.816829
CG9203	0.904706	0.957021	0.768282	1.1534	1.23311	1.05444	1.13191	1.0848	1.09851	1.60969	1.199	1.30069	1.29378	1.46024	1.40259	1.5066	1.28429	1.25156	1.36687	1.12639	1.13728	1.34726	1.34204	1.71167	1.20328	1.22909	1.08739	1.48075	1.56941	1.22303	1.10543	1.002	0.989453	1.08908	1.22969	1.46034
CG43139	-0.683589	-0.408248	-0.119587	-0.415085	-0.0500454	-0.100606	-0.709824	-0.562531	-0.334579	-0.670689	-0.623511	-0.608616	-0.811303	-0.410781	-0.263412	-0.759366	-0.821219	-0.561119	-0.778972	-0.565753	-0.837149	-0.341025	-0.888415	-0.826351	-0.258406	-0.159919	-0.544147	-0.300159	-0.171224	0.0161595	-0.434289	-0.323418	-0.371908	-0.559853	-0.499397	-0.100134
CG43386	-0.361151	-0.442966	-0.57249	-0.351195	-0.229722	-0.354559	-0.699036	-0.512156	-0.408171	-0.170835	-0.159825	-0.244419	-0.681664	-0.28928	-0.675482	-0.501912	-0.621824	-0.793545	-0.8296	-0.515691	-0.507182	-0.55074	-0.616545	-0.725166	-0.390396	-0.646343	-0.622633	-0.528237	-0.36679	-0.497235	-0.466478	-0.232525	-0.367006	-0.565782	-0.465222	-0.722453
Gr43a	-0.865852	-0.691841	-0.709858	-0.758641	-0.252554	-0.436803	-0.635187	-0.53319	-0.659573	-0.692293	-0.593103	-0.704823	-0.488342	-0.696835	-0.627997	-0.607634	-0.41695	-0.640968	-0.740137	-0.583234	-0.455015	-0.453922	-0.582608	-0.473442	1.34895	0.910152	1.42608	2.76389	2.37142	2.45141	1.6277	1.90513	1.72243	1.16581	2.20073	1.87479
sad	-0.58526	-0.891295	-0.461889	-0.578301	-0.723892	-0.378357	-0.386923	-0.416698	-0.350603	-0.44976	-0.562399	-0.275315	-0.552428	-0.457267	-0.341818	-0.482562	-0.60652	-0.572475	-0.707383	-0.663895	-0.685661	-0.664168	-0.423268	-0.465169	-0.854019	-0.552048	-0.749942	-0.612265	-0.536544	-0.628415	-0.662761	-0.685253	-0.646297	-0.744434	-0.64196	-0.707423
TbCMF46	-0.334464	-0.47319	-0.635834	-0.324182	-0.28951	-0.520821	-0.515201	-0.481985	-0.736836	0.0154132	-0.430867	-0.367896	-0.601548	-0.483366	-0.536215	-0.164014	-0.216946	-0.363077	-0.54849	-0.531411	-0.425031	-0.542225	0.311947	0.217129	-0.50119	-0.414007	-0.585243	-0.338787	0.11072	-0.330176	-0.13629	-0.505709	-0.448423	-0.657454	-0.409413	-0.747443
CG43751	-0.352909	-0.501166	-0.223009	-0.238078	-0.211365	-0.0587064	-0.290527	-0.323979	-0.110542	-0.461394	-0.370969	-0.183092	-0.772575	-0.730417	-0.619812	-0.599059	-0.430886	-0.656365	-0.617655	-0.428212	-0.492258	-0.664269	-0.407672	-0.428326	-0.387231	-0.597459	-0.33416	-0.300296	-0.582186	-0.285651	-0.404065	-0.249486	-0.451165	-0.449126	-0.431751	-0.358319
TepI	-0.983274	-0.953327	-0.98565	-0.982952	-0.968387	-0.99014	-0.988582	-0.97932	-1	-0.849785	-0.969638	-0.927046	-0.794828	-0.0743867	-0.502421	-0.824358	-0.882718	-0.673917	-0.808804	-0.957271	-0.731493	-0.91018	-0.813934	-0.743436	-0.723912	-0.909945	-0.68366	-0.640051	-0.752865	-0.618212	-0.781747	-0.710841	-0.824059	-0.820723	-0.894214	-0.841331
dila	0.0399121	-0.0260131	0.0400142	0.265046	0.0695506	0.169626	0.0620964	-0.0718371	-0.0439547	0.940933	0.124953	0.212997	0.181438	0.373228	0.362453	0.589803	0.627605	0.317396	0.152062	0.0111616	0.142032	0.260078	0.77054	1.41184	0.327158	0.158769	0.192798	0.662178	0.885005	0.547724	0.482853	0.492105	0.494638	0.27894	0.668258	0.466068
Gr85a	-0.941734	-1	-0.901497	-1	-1	-0.931709	-1	-1	-1	-0.939132	-0.946771	-0.890886	-0.966511	-0.940107	-1	-1	-1	-1	-1	-0.949791	-1	-0.909326	-0.971046	-1	-0.905406	-1	-0.966603	-0.881177	-0.897844	-1	-1	-0.875005	-0.702276	-1	-0.762115	-0.963418
CG13226	0.118792	0.396381	0.163977	0.28701	0.247854	0.344923	-0.0100098	-0.213136	0.0904341	0.329605	0.888543	0.712505	-0.5221	0.315317	-0.300326	-0.222477	-0.124816	0.050078	-0.426067	-0.328953	-0.411424	-0.098652	-0.282698	-0.102564	-0.661528	-0.637652	-0.606799	-0.389874	-0.781397	-0.516732	-0.541969	-0.563686	-0.572436	-0.37575	-0.737146	-0.881122
CR31292	-0.848683	-0.357295	-0.536175	-0.408078	-0.390969	-0.593838	-1	-0.904471	-1	-1	-0.861389	-0.724037	0.562347	0.309488	0.202796	-0.50507	-0.657778	-0.187831	0.645137	0.75513	0.986848	0.744019	0.852338	0.750527	-1	-1	-1	-1	-1	-1	-1	-1	-1	-1	-1	-1
Gsc	-0.780276	-0.872006	-0.832128	-0.676293	-0.673523	-0.715869	-0.708177	-0.763387	-0.828325	-0.719024	-0.846171	-0.87373	-1	-0.854976	-0.871559	-0.978206	-0.976256	-0.893427	-0.857095	-0.901471	-0.92947	-0.931606	-0.783592	-0.81168	-0.936383	-0.939821	-0.966672	-0.862566	-0.865608	-0.944007	-0.947357	-0.895311	-0.919777	-1	-1	-0.945581
rib	-0.897348	-0.941216	-0.974174	-0.811464	-0.87558	-0.807812	-0.969262	-0.953706	-0.969199	-0.175365	-0.842584	-0.72795	-0.915895	-0.923884	-0.893888	-0.752502	-0.816009	-0.797659	-0.96954	-1	-0.941935	-0.896178	-0.0649039	0.66221	-0.827476	-0.908516	-0.860179	-0.589477	-0.439127	-0.84748	-0.611107	-0.690757	-0.696242	-0.973709	-0.794929	-0.732764
Gr66a	-0.575904	-0.745751	-0.690022	-0.45484	-0.227463	-0.352589	-0.698007	-0.433624	-0.672843	-0.59419	-0.405496	-0.42129	-0.140596	-0.599991	-0.463812	0.208325	-0.254226	-0.431871	-0.750533	-0.433904	-0.30341	-0.549278	-0.410941	-0.476434	-0.595631	-0.400877	-0.353932	-0.299078	-0.347824	-0.00978785	-0.244884	-0.192292	-0.430744	-0.716756	-0.486107	-0.632218
CR43964	-0.186415	0.142327	-0.328285	-0.411549	-0.166319	-0.253298	-0.510484	-0.465349	-0.409268	-0.500952	-0.433819	-0.701076	-0.408565	-0.253663	-0.325028	-0.167998	0.739418	-0.309354	-0.736798	-1	-0.688784	-0.728134	-0.509396	-0.367956	0.569358	-0.0327115	0.0860961	0.189486	0.324893	0.455845	-0.0907918	0.0766046	-0.237797	-0.541887	0.282534	0.117605
Sld5	0.691821	0.798157	0.358713	0.961233	1.31647	0.934455	0.7437	1.00463	0.966288	1.94755	1.21317	1.13527	1.01535	0.891934	0.884947	0.848668	1.05787	1.05317	0.763794	0.986331	0.76744	0.972961	1.22976	1.84196	0.945851	0.815672	0.690539	1.23504	1.45756	0.924794	0.821636	0.754879	0.652022	1.20132	1.14734	1.02669
Osi6	-0.672536	-0.312313	-0.53297	-0.594365	-0.956997	-0.775248	-0.909002	-0.480173	-0.628626	-0.263556	0.0927416	0.273049	-1	-1	-1	-1	-0.306811	-0.943996	-1	-0.747121	-0.791852	-0.829656	0.161987	0.857915	-0.975033	-0.937902	-0.851272	-1	-0.705071	-1	-0.959064	-1	-1	-1	-0.93487	-0.863504
CG10591	-1	-1	-1	-1	-0.938591	-0.961676	-0.912699	-0.920467	-0.642398	-0.932549	-0.940998	-0.918422	-0.891307	-0.933628	-0.9414	-1	-1	-0.959536	-1	-1	-0.937033	-0.851947	-0.936453	-0.965959	-0.964251	-0.869309	-0.926834	-1	-1	-1	-0.913154	-1	-1	-1	-1	-1
CG12995	0.379955	0.692797	0.96692	0.370484	0.228525	0.320103	0.270908	0.787049	0.729957	0.472102	0.839587	1.10253	1.26719	1.22785	0.608286	0.0816308	0.610682	0.930445	1.23979	1.42608	1.13728	0.722388	0.559496	0.769494	0.379453	1.13246	0.700372	0.659935	1.39283	1.1231	1.32298	1.15388	0.856527	0.861186	0.926727	0.611613
CG10440	1.04972	1.00669	1.05873	0.919425	0.702322	0.910573	0.992238	0.750064	0.945115	0.609835	0.842825	0.790876	1.22034	0.996813	1.14055	1.1093	0.861896	1.06417	1.13652	1.11847	1.02471	1.42785	1.28661	1.48714	1.08299	1.1131	1.15616	1.08604	0.749012	1.1871	1.00827	0.831811	1.14837	1.18116	1.01882	1.29674
RYamide	-0.445499	-0.268178	0.003178	-0.436617	-0.361696	-0.130661	-0.600193	-0.339842	-0.321943	-0.548433	-0.59887	-0.325901	-0.906762	-0.688489	-0.0328825	-0.167716	-0.267225	-0.552137	-0.43966	0.00488797	-0.348381	-0.0573552	-0.70073	0.11178	0.345494	-0.280009	-0.659371	-0.42652	-0.496961	0.0105379	-0.49057	-0.174728	0.1196	-0.309719	0.0732515	-0.271374
CR42786	1.9001	1.75869	2.14699	1.15136	1.48102	1.21149	0.0369718	1.0586	-0.159584	0.816489	0.369525	-0.0591371	0.312934	-0.00550702	0.0346041	0.192531	0.633334	0.515326	-0.865496	-0.499647	-0.87034	-0.248621	-0.638499	-0.619311	0.247907	0.0467908	0.461792	0.826121	1.07268	0.81016	-0.568372	-0.901542	-0.657101	-0.675008	-0.644093	-0.216353
CG15646	-1	-0.875636	-1	-0.914543	-0.796299	-0.901835	-0.851034	-0.71033	-0.942203	-0.677631	-0.758796	-0.860609	-0.436779	-0.422203	-0.948778	-0.50066	-0.431395	-0.44302	-0.834889	-0.814542	-0.840776	-0.955385	-0.462448	-0.0309401	-0.938227	-0.885409	-0.483089	-1	-0.808298	-1	-0.948888	-0.958457	-0.937338	-1	-0.918846	-0.964561
snoRNA:Psi28S-1135c	-0.573337	-0.744122	-0.627046	-1	-1	-1	-0.696103	-0.487963	-0.230333	-1	-0.606235	-0.714699	-0.741683	-1	-1	-0.672647	-1	-0.720435	-1	-1	-0.776348	-0.65425	-1	-1	0.864124	-1	-1	-1	-1	-0.587354	-0.791512	-0.67589	-1	-1	-1	-1
Gr33a	-0.957193	-0.95181	-1	-0.813317	-0.881209	-0.764757	-0.913814	-0.947185	-0.872326	-0.911887	-0.885778	-0.747385	-0.858617	-0.87181	-0.781361	-0.658024	-0.773348	-0.84648	-1	-0.927199	-0.802448	-0.933187	-0.710522	-0.126167	-1	-0.9127	-0.904479	-0.856538	-0.853038	-0.918719	-0.668267	-0.849152	-0.906448	-0.92608	-0.794829	-0.89558
CG14309	-1	-0.97864	-1	-1	-0.981989	-0.988823	-0.974231	-0.964995	-0.961439	-1	-0.965615	-0.975954	-1	-1	-0.965851	-1	-0.925002	-1	-0.924712	-0.983698	-1	-0.985063	-0.981352	-0.990083	-0.968965	-1	-0.978478	-0.986813	-1	-1	-1	-0.972335	-1	-0.983442	-1	-1
CG10927	0.86511	0.720204	0.723195	0.73579	1.22229	0.834213	0.557659	0.533987	0.487772	1.60605	0.878928	1.14148	1.24156	1.19572	0.986701	1.30555	0.823341	1.33357	1.03611	0.725573	1.01647	1.16978	1.26208	1.21173	0.732168	0.71733	0.837759	0.821372	1.22795	0.904958	0.69447	0.522654	0.695881	0.709405	0.901909	1.31422
snoRNA:MeU6-A47	-0.376356	-1	-1	0.0720754	-1	-0.601639	-1	-1	-1	0.0914264	-0.421649	-0.57388	0.158674	-0.362001	-0.42497	-1	-1	-0.582062	1.27305	0.515352	-1	-1	-0.15364	-0.115471	-0.0822725	-1	-0.0575138	-1	-1	-1	-1	0.754879	-0.620673	-1	-1	-0.581051
CG43400	-0.568107	-0.57301	-0.707937	-0.710345	-0.499796	-0.730679	-0.692222	-0.783341	-0.87652	-0.28753	0.13324	-0.585703	-1	-0.876021	-1	-1	-1	-1	-1	-1	-0.93993	-0.904193	-0.77144	0.0960708	-1	-1	-1	-0.835005	-0.667839	-1	-0.944221	-1	-1	-1	-1	-1
Efhc1.2	0.43916	0.467783	0.415435	0.777695	0.582786	0.477354	0.513696	0.537277	0.532286	1.28819	0.693733	0.597852	-0.333338	-0.51448	-0.2306	-0.511377	-0.255915	-0.407736	-0.384741	-0.777029	-0.477962	-0.395522	-0.156765	0.990044	0.491723	0.667015	0.552947	0.538143	0.627268	0.673441	0.535139	0.635583	0.488737	0.819494	0.684241	0.749893
CG2617	0.807158	1.00625	0.865898	1.46429	1.10497	1.12209	1.18246	1.20239	1.08403	1.72127	1.18953	1.24711	1.47561	1.74498	1.78053	1.77385	1.82427	1.3713	1.30892	1.64046	1.53026	1.65927	2.02612	2.07991	1.51867	1.40259	1.4373	1.54272	1.87331	1.33875	1.47314	1.28922	1.45267	1.39536	1.44493	1.71117
CG6280	0.405615	0.48595	0.458423	0.758852	0.518962	1.00243	1.00864	0.490563	0.924026	-0.0434609	0.148561	0.420523	-0.444288	-0.138197	-0.336555	-0.634256	-0.515318	-0.143567	-0.413999	-0.340279	-0.362832	-0.779431	-0.668725	-0.598762	-0.941907	-0.970434	-0.939815	-0.912586	-0.924962	-0.861196	-0.825324	-0.922927	-0.929568	-1	-0.894207	-1
CG30187	0.0839336	0.121208	0.172034	0.343594	0.376082	0.166007	0.170233	0.277964	0.244811	0.0743871	0.168725	0.19204	0.489481	0.481068	0.584964	0.434962	0.564566	0.580544	0.515291	0.240725	0.585337	0.528519	0.464413	0.651505	0.351289	0.498526	0.161742	0.265349	0.137437	0.420153	0.402883	0.156737	0.421153	0.394525	0.275373	0.516368
Cad74A	-0.421189	-0.451482	-0.38746	-0.484817	-0.813609	-0.585351	-0.178983	-0.336251	-0.353815	-0.704037	-0.531207	-0.503769	-0.48381	-0.351618	-0.415418	-0.550716	-0.361704	-0.301811	-0.150965	-0.0992515	-0.311198	-0.337621	-0.299697	-0.39715	-0.433036	-0.361848	-0.388373	-0.281783	-0.624544	-0.5093	-0.246859	-0.175872	-0.246146	-0.286359	-0.380112	-0.413043
BBS8	0.0637464	0.0368777	-0.202626	0.438855	0.442119	0.342289	0.0396647	-0.00381014	0.251681	0.373012	0.0516051	0.232179	0.343055	0.684067	0.547378	1.19157	0.900037	0.690946	-0.0733913	-0.0279802	0.536821	0.488753	0.474207	0.164907	0.473561	0.517159	0.0310385	0.778454	0.514043	0.742799	0.668091	0.572552	0.511496	-0.191537	0.479676	-0.0251218
l(1)G0045	1.2055	1.12276	1.21983	1.17049	1.10331	1.33652	1.3096	1.46944	1.35011	1.57581	1.4566	1.48884	1.01331	1.12738	1.03383	0.991033	1.3098	0.932358	0.774377	0.680914	0.84342	1.34569	1.31374	1.60622	0.927812	0.814997	0.693218	0.85061	0.837794	0.904292	0.688902	0.731245	0.762563	0.808941	1.18769	1.11877
CG34451	-0.74153	-0.610633	-0.545776	-0.234445	-0.227463	-0.202179	0.0861103	-0.551738	-0.355992	0.308672	-0.0780648	-0.0757676	-0.221345	-0.596318	-0.452075	-0.339239	-0.408641	-0.380401	-0.156167	-0.61763	-0.381369	-0.077362	-0.174555	0.115484	-0.420169	-0.507975	-0.513158	-0.227337	-0.448343	-0.352549	-0.470685	-0.512366	-0.499555	-0.218188	-0.29881	-0.425618
tap	-0.872483	-0.856961	-0.763357	-0.870123	-0.878606	-0.961321	-0.955279	-0.93939	-1	-0.965564	-0.883271	-0.958252	-0.804896	-0.692441	-1	-0.881639	-0.947186	-0.843157	-0.643001	-0.943827	-0.831569	-0.874473	-0.75899	-0.647067	-0.96392	-0.889293	-0.981184	-0.954442	-0.780255	-0.8771	-0.970192	-0.952012	-0.892861	-0.888086	-0.861857	-0.805968
CR9162	0.597205	-0.0434173	0.154273	0.527362	0.369945	0.131714	0.166621	0.124449	-0.349717	-0.727808	-0.213915	-0.41048	0.166528	-0.014233	-0.130328	-0.387266	-0.00466047	-0.306698	-0.116648	0.178078	-0.111262	-0.141897	-0.265159	-0.302694	-0.313385	-0.65038	-0.19697	-0.267216	-0.489781	-0.180871	-0.361902	-0.507366	-0.54005	-0.646866	-0.842739	-0.349967
Gyc-89Da	-0.147446	-0.00703552	-0.257579	-0.293571	-0.584654	-0.359514	-0.342699	-0.127142	-0.328773	-0.526143	-0.443213	-0.467608	-0.279777	-0.269973	-0.306343	-0.339106	-0.26289	-0.124692	-0.207354	-0.367444	-0.0542854	-0.103408	-0.233494	-0.136912	-0.0525542	-0.0859263	0.0236355	-0.00741829	-0.106086	-0.00438413	-0.180028	-0.0123673	-0.148615	0.00703976	0.0657509	0.0304695
CG13813	0.214916	0.0886535	-0.086171	-0.0590469	-0.230993	-0.0810648	0.635971	0.441318	0.928057	1.18208	0.403673	0.258497	-0.366912	-0.516912	-0.259095	-0.719428	-0.552079	-0.577317	-0.219282	0.149539	0.101883	-0.12272	0.0660764	0.467235	-0.526397	-0.425162	-0.649865	-0.534928	-0.512902	-0.418749	-0.260359	-0.489439	-0.379264	-0.305056	0.084988	0.0456258
CG14860	-0.0926393	-0.159992	-0.151467	0.111248	0.220852	0.138485	0.106655	-0.0176377	-0.219759	0.190147	0.220849	-0.0534093	0.157493	0.137992	0.0773258	0.199253	0.0589582	0.335389	-0.277293	0.435868	-0.0878931	0.192998	-0.103628	0.589527	0.0396891	0.0341529	-0.155146	-0.143516	-0.100002	0.331463	-0.159062	-0.176966	-0.36598	-0.180931	-0.290926	0.113667
CG17173	-0.912875	-0.974896	-0.96201	-0.954938	-1	-0.973831	-0.882528	-0.892883	-0.910834	-0.426457	-1	-0.890155	-0.949713	-0.785799	-0.92088	-0.96714	-1	-0.972364	-1	-0.961921	-1	-0.931	-0.469946	0.31822	-0.951599	-1	-0.974707	-0.938953	-0.527092	-0.957426	-1	-1	-0.857444	-1	-0.936321	-1
Osi24	0.731242	0.944465	0.808279	0.506163	0.388158	0.846713	0.279701	0.0626798	0.129682	-0.0740407	0.0882523	0.623228	1.15866	0.944144	0.831304	0.628182	0.911917	0.753516	0.275688	0.409272	0.248986	0.969195	0.827543	0.745016	0.994286	0.912507	0.82851	0.847315	0.479103	0.531287	0.197494	0.131954	0.284503	0.833516	0.816762	0.679659
Or85b	-0.828979	-0.693644	-0.761436	-0.881604	-0.837075	-0.864224	-0.959339	-0.891761	-1	-0.87868	-0.794571	-0.65907	-0.837117	-0.43966	-0.946206	-0.791785	-0.816783	-0.695944	-0.826931	-0.675373	-0.484699	-0.624676	-0.633872	-0.543736	-0.243162	-0.394621	-0.533854	-0.477014	-0.737961	-0.353706	-0.217378	-0.255342	-0.274687	-0.713471	-0.488262	-0.443665
alphaPS4	-0.564099	-0.49134	-0.485595	-0.689984	-0.629044	-0.364763	-0.643387	-0.672575	-0.742152	-0.322497	-0.214404	-0.401942	-0.610566	-0.55342	-0.371713	-0.616374	-0.612218	-0.493986	-0.512624	-0.350754	-0.469873	-0.533547	-0.402299	-0.309979	-0.470865	-0.583275	-0.602334	-0.672158	-0.59647	-0.518696	-0.529946	-0.527702	-0.591871	-0.584721	-0.466423	-0.474322
CG33213	0.420003	0.6642	0.627453	0.938932	1.16137	1.07908	0.994386	0.706437	0.705968	1.67273	0.863843	1.14948	0.974479	1.23922	0.856539	1.02605	1.3984	0.958788	1.14825	1.06166	1.0549	1.10337	1.18888	1.47231	1.26281	0.682123	1.10087	1.26548	1.50562	1.12821	1.07064	1.22654	0.995171	1.11252	1.20696	1.07986
CG30036	-0.948795	-0.914405	-0.91329	-0.973675	-1	-0.969668	-1	-1	-1	-0.284349	-0.953232	-0.935233	-0.9706	-0.754142	-0.908553	-1	-0.958539	-0.967969	-0.948156	-1	-0.950074	-0.881907	-0.33419	0.271052	-0.916744	-0.650175	-0.859022	-0.797716	-0.380781	-0.856872	-0.953652	-0.88985	-0.915555	-0.675435	-0.822454	-0.788874
CR34046	-0.84836	-0.192626	-0.439227	-0.353944	-0.0383382	-0.59304	-0.797068	-0.814485	-0.844885	0.110271	-0.0666944	-0.421806	-0.828402	-0.458031	-0.736081	-0.886253	-1	-0.432378	-1	-1	-0.783364	-1	-0.850701	-0.842159	-0.315232	-0.794548	-0.75033	-0.793471	-0.453618	-0.599529	-0.862301	-0.887464	-0.755221	-1	-0.888508	-0.728358
CG10764	-0.445499	-0.2826	-0.437237	0.620654	-0.0189709	-0.077248	-0.12167	0.0368299	0.0772224	-0.0597863	-0.239134	-0.412599	-0.0110547	0.059722	0.115791	-0.375183	-0.395918	-0.108237	-0.0592173	0.0755097	0.0598856	-0.45302	0.478475	1.009	-0.448546	-0.530887	-0.337749	-0.241707	-0.0320401	-0.435236	-0.302228	-0.192292	-0.234073	-0.505262	-0.365792	-0.255571
CG1126	0.59936	0.570036	0.490533	0.817477	1.11001	0.708546	0.286038	0.141742	0.295962	0.809311	0.10287	0.448143	0.623946	0.82671	0.613077	1.23157	1.15063	0.906875	0.105207	0.456509	0.564956	0.680189	0.504531	0.559889	0.607515	0.78195	0.663891	1.23052	1.1047	1.1751	1.12333	1.06351	1.07257	0.489224	1.3057	0.317686
CR43301	0.907809	0.580707	0.975086	1.01163	1.20733	1.1643	0.693909	0.515403	0.553959	0.997902	0.62246	0.88866	1.33332	1.24666	1.37978	1.51929	1.21937	1.60383	0.942487	1.23356	1.16405	1.36041	1.09828	0.705831	0.844139	0.545759	0.632794	0.940223	0.983081	1.0739	0.688543	0.677109	0.604508	0.532463	0.658333	0.468327
tin	-0.917002	-0.658405	-0.860493	-0.602847	-0.521009	-0.665224	-0.618588	-0.849471	-0.834832	-0.577179	-0.509412	-0.539225	-0.361464	-0.134313	-0.597542	-0.497778	-0.436493	-0.712201	-0.168443	-0.481446	-0.525381	-0.337775	-0.477031	-0.545149	-0.630283	-0.683486	-0.755028	-0.755085	-0.528479	-0.375837	-0.657961	-0.666489	-0.864075	-0.423695	-0.644947	-0.566467
CG15036	-0.169235	-1	-1	-0.0347232	0.221178	0.30174	-1	-0.867221	-0.600579	0.097471	-0.639327	-0.327606	-0.153123	-0.433927	-0.490993	0.565348	-0.412484	0.349495	-1	-1	-0.24901	-1	-0.380652	-0.277713	-0.0448014	-0.596665	0.0439486	1.15705	0.462532	0.699405	1.24153	0.7136	0.305836	-0.1396	0.545537	-0.866392
CG14491	-1	-1	-0.883366	-0.862335	-0.871304	-0.842278	-0.90654	-0.834428	-1	-0.730484	-0.762259	-0.477048	-0.921434	-1	-1	-1	-0.889956	-0.833842	-1	-0.774969	-1	-0.892583	-1	-0.793739	-0.784011	-0.732821	-0.776652	-1	-0.767496	-1	-0.937357	-1	-1	-0.881332	-1	-0.833405
CG40801	-0.448768	-0.7408	-0.416343	-0.224727	-0.848777	-0.730679	-0.889949	-0.899671	-1	-0.314555	-0.489688	-0.398348	-0.820392	-0.690478	-0.603783	-0.573006	-0.444788	-0.805188	-0.839322	-0.862543	-0.845059	-1	-0.843677	-0.915013	-0.467613	-0.888538	-0.907651	-0.686959	-0.572182	-1	-0.663371	-0.5771	-1	-0.860477	-0.674612	-0.899037
CG30095	-0.533798	-0.440977	-0.66473	-0.13877	-0.408014	-0.605963	-0.666667	-0.694145	-1	-0.690453	-0.726514	-0.578463	-0.665619	-0.606178	-0.647962	0.128214	-0.832473	-0.487355	-0.892629	-0.822252	-0.847453	-0.836397	-0.621251	-0.943703	-0.677047	-0.855492	-0.938773	-0.0339275	-0.416917	-0.2682	-0.72879	-0.212571	-0.489754	-1	-0.314392	-0.932996
snoRNA:Psi18S-1377e	-0.55725	-0.73389	-0.612724	-0.207321	0.607515	0.181037	-0.425185	0.0784765	-0.548065	0.0886293	0.568211	-0.064191	-1	-0.546428	-0.593702	0.375838	-0.632793	0.225992	-0.211302	-1	-0.391107	0.574684	0.271077	-0.0463638	1.05306	-0.197591	-0.138902	-0.416194	-0.1104	0.447915	-0.594475	-0.663233	-0.152778	0.810705	0.0296671	-1
CG31065	-1	-0.968718	-0.952711	-1	-0.94769	-1	-0.962288	-0.932189	-0.943681	-1	-1	-1	-0.937468	-1	-1	-0.959079	-0.870256	-0.866948	-0.944299	-0.9526	-0.946358	-0.956531	-1	-0.914817	-0.969588	-0.852888	-0.937637	-0.96158	-0.967098	-1	-0.974884	-1	-0.717657	-0.860162	-1	-0.898806
CG30379	-0.171512	2.27015e-05	0.160374	0.253364	0.337204	0.321401	-0.0692917	0.751503	0.169036	-0.340595	-0.409892	-0.201353	-0.135279	-0.0226015	-0.319938	-0.202312	-0.466752	0.664188	0.123351	-0.347931	-0.255765	-0.0295668	-0.397929	-0.215409	0.349921	-0.0892506	0.071846	0.107227	0.190674	0.695802	0.0367257	-0.243333	0.0768796	-0.253972	-0.249022	-0.609584
bgcn	-0.982451	-0.990077	-0.970042	-0.870965	-0.918487	-0.870967	-0.918155	-0.935867	-0.98203	0.740584	-0.832945	-0.902406	-0.802839	-0.964132	-0.952813	-0.948651	-0.930465	-0.894262	-0.89652	-0.897527	-0.940999	-0.958907	0.604375	1.74695	-0.809884	-0.871776	-0.336297	-0.455164	-0.0247727	-0.901506	-0.806215	-0.876226	-0.644932	-0.910378	-0.842526	0.165418
CG15093	6.39105	6.49831	6.44933	5.67641	6.45395	5.73577	5.39723	5.70383	5.32172	6.2951	5.52551	5.36122	6.32925	6.17932	6.12053	5.71205	5.6725	5.86254	4.84363	5.10958	5.13351	5.2718	5.43545	5.41945	6.4897	6.44402	6.28749	6.10069	6.64675	6.32416	5.55868	5.53712	5.72608	5.51312	5.5918	5.4909
snoRNA:Me18S-A934	-1	-0.313021	-0.450504	-0.648808	-1	-0.28981	0.07408	0.003091	0.0756437	-1	-1	-0.57388	-0.0555978	0.416033	-0.42497	-0.15159	-0.0948449	-0.582062	-1	-1	-1	-0.1116	-0.659738	-1	0.986881	-0.542282	-0.308861	0.524737	-1	-1	-1	0.129277	0.13943	0.272617	0.360675	0.424798
sim	-0.884583	-0.923034	-0.868806	-0.969699	-0.9811	-0.942284	-0.894769	-0.939307	-0.939744	-0.879534	-0.894384	-0.937736	-0.838247	-0.825604	-0.829168	-0.806109	-0.906156	-0.857905	-0.959998	-0.949276	-0.952014	-0.864705	-0.675039	-0.823262	-0.88405	-0.919334	-0.702812	-0.867249	-0.976424	-0.943318	-0.929372	-0.900871	-0.862027	-0.788975	-0.901795	-0.868878
CG14258	-0.714935	-0.793356	-0.810382	-0.67746	0.232009	-0.633672	-0.504966	-0.616728	-0.582493	-0.637631	-0.679187	-0.607855	-0.247544	0.124078	0.0276208	0.171971	0.215489	0.216334	0.658604	0.34978	0.406023	0.16765	0.107799	0.208147	-0.218921	-0.12846	-0.479464	0.436421	0.389911	-0.0790107	0.296244	0.188597	0.36706	0.163147	-0.127013	-0.0343861
CG8223	3.73306	3.77269	3.978	3.99776	3.98104	4.08271	4.00315	4.03356	3.95927	3.8737	3.84272	3.91633	3.69318	3.76504	3.72271	3.82935	4.09039	3.82626	3.66078	3.7307	3.71786	3.79763	3.73121	3.79565	3.73537	3.7681	3.68811	3.8384	3.86094	3.93468	3.84822	3.75132	3.76292	3.71632	3.74141	3.74464
Cec2	-1	-0.813418	-1	-0.300535	0.260267	-0.343825	-0.262521	-0.618031	0.00213204	-0.403566	-1	-0.609185	-0.12264	-1	-0.7111	-1	-1	-0.7957	-1	-1	-0.691293	-1	-0.835958	-1	-1	-1	-1	-1	-1	-1	-0.848644	-1	-1	-1	-1	-0.795169
CG12659	0.745873	0.645332	1.0381	0.896575	0.954208	0.897123	0.794747	0.601945	0.484697	1.38389	0.987127	0.988348	1.12563	0.708112	0.954625	0.975107	0.938952	0.691036	0.758684	0.809149	0.735755	0.693659	1.08849	1.24546	0.815118	0.870753	0.844101	0.936532	0.997669	0.872067	0.660312	0.901126	0.888057	0.595518	0.962837	0.851046
CG13924	-0.0415611	0.168148	-0.0175157	0.364464	0.0997383	0.294923	-0.30355	-0.196793	-0.00049647	0.0622897	0.223243	0.362152	-0.0819449	0.00254447	0.10346	0.20162	0.65634	-0.1134	-0.107508	-0.0571825	-0.0956684	0.0352134	-0.139323	0.118049	0.0861234	0.131055	-0.201529	0.120551	0.0705298	0.323203	0.321271	0.414956	0.280326	-0.179114	0.199612	-0.261202
CG3777	0.725678	0.813132	0.919859	0.71663	0.428272	0.723946	0.570492	0.664043	0.834849	-0.0563912	0.468041	0.710014	1.72951	1.89067	1.67323	1.8729	1.68109	1.74597	1.34948	1.26859	1.2001	1.19041	0.994375	1.26635	1.53432	1.54798	1.58342	1.57399	0.937953	1.30657	1.44707	1.56327	1.16007	0.754662	0.921351	0.95437
DNApol-alpha60	-0.256945	-0.0722258	0.0248712	0.138697	0.378497	0.193861	-0.0177947	0.236019	0.025027	0.320159	0.221056	0.134291	-0.0293512	0.236922	0.350891	0.0568915	0.238269	0.0934203	0.0567732	-0.214536	0.166572	0.118252	0.147352	0.0589991	0.196839	0.0468439	-0.0913298	0.0779157	0.331127	0.374995	0.064006	0.0485802	0.0105973	0.0888795	0.05557	0.187063
CG9430	-0.941734	-0.966853	-1	-0.802084	-0.89124	-0.898739	-0.960045	-0.9282	-0.827987	-0.440237	-0.797942	-0.822475	-0.839829	-0.882603	-0.947135	-1	-0.819812	-0.927937	-0.884334	-0.949791	-0.971314	-0.909326	-0.758223	-0.719085	-1	-0.920145	-0.966603	-1	-0.356098	-1	-0.896358	-0.915479	-0.935337	-0.899768	-1	-0.963418
CR43927	0.54936	0.775692	1.10557	0.772913	1.53287	1.29937	0.1453	0.549376	0.496532	1.33041	0.661154	1.25319	0.71385	0.150268	1.36766	1.5428	-0.323695	0.911895	0.0361391	0.773966	0.663017	0.880814	0.857826	1.05995	0.560556	0.557992	0.595207	1.32587	0.897956	0.361125	0.955904	0.6142	0.65223	0.491198	0.552913	0.842383
CR43650	0.703214	0.855228	0.679434	0.497917	-0.176139	0.275786	0.378448	0.624473	0.498317	0.100028	0.648139	0.394013	0.578834	0.69683	0.682335	0.217041	-0.140277	0.352795	0.122554	0.152129	-0.0307518	0.182694	0.300663	0.206941	0.453979	0.220797	0.453341	0.28951	-0.298339	0.0980958	0.076721	0.235623	0.33256	0.379722	0.392061	0.402821
CG42826	-1	-0.917916	-0.800462	-0.787444	-0.821772	-0.757358	-1	-0.96942	-0.901198	-0.804986	-1	-0.793449	-0.890473	-0.853638	-1	-0.893192	-0.811438	-0.880959	-1	-1	-0.952146	-0.961236	-1	-0.948837	-0.972893	-1	-0.944349	-0.867605	-0.970671	-0.952743	-0.933869	-1	-1	-1	-1	-1
shd	0.994886	1.36965	1.14628	1.09642	0.443831	0.919373	1.33216	1.07104	0.972444	0.693714	0.235123	0.634428	0.584416	0.751085	1.43774	0.575595	0.840209	0.607846	0.623846	0.969459	0.970071	0.67612	0.677609	1.04676	1.38181	1.42519	1.21813	0.822791	0.563621	0.831506	1.08025	1.17354	1.08694	0.595632	0.260448	0.453389
CG42366	-0.0835458	-0.114235	-0.275691	0.131465	-0.201067	-0.0380482	-0.200544	-0.287102	-0.361712	-0.110766	-0.0676221	-0.0845436	-0.0600257	0.0951063	0.0696432	0.345772	0.461446	-0.00696674	-0.300784	-0.182299	0.0604236	0.217573	-0.15058	0.0346328	-0.172772	-0.00874983	-0.101213	0.341537	-0.199548	0.0927464	0.325194	0.0337509	0.0620017	-0.134442	0.134087	-0.283426
CG40467	-0.3176	-0.303889	-0.538393	-0.43792	-0.789998	-0.461287	-0.22448	-0.341322	-0.207522	-0.293015	-0.413685	-0.327406	-0.475322	-0.20495	-0.568601	-0.173616	-0.226089	-0.339343	-0.261729	-0.112142	-0.170577	-0.241007	-0.351136	-0.269168	-0.165288	-0.124081	-0.218777	0.075264	0.0315037	0.0413275	-0.0973851	0.061191	-0.180791	-0.0292805	-0.253609	0.067861
sc	-1	-1	-0.958286	-0.950532	-0.953848	-0.943071	-1	-0.940134	-0.767046	-1	-1	-0.968965	-1	-1	-1	-1	-1	-1	-1	-1	-1	-1	-1	-0.974476	-1	-1	-0.972216	-1	-1	-0.907987	-1	-0.964307	-1	-1	-1	-1
tilB	0.395418	0.515811	0.564157	0.849649	0.812642	0.890004	0.676928	0.604719	0.436785	2.00852	0.990629	0.597539	0.625476	0.924168	0.995018	0.921978	1.02515	1.06172	0.446132	0.915047	0.888155	1.15398	1.62084	2.37499	0.791896	0.65612	0.707081	1.27034	1.55621	1.38379	1.11765	1.2689	1.22894	1.05758	0.920105	1.04912
CG43173	-0.940413	-0.837921	-0.948769	-1	-1	-0.930167	-1	-0.92658	-1	-0.473026	-0.746289	-0.751999	-1	-1	-1	-0.95566	-1	-1	-0.826092	-1	-0.941898	-1	-0.520688	0.00842939	-0.934811	-0.958597	-0.867958	-1	-0.677788	-1	-0.94605	-1	-1	-1	-1	-1
pgc	-0.0742331	-0.325895	-0.512099	-0.341742	-0.666448	-0.728532	-0.383581	-0.361265	-0.513929	-0.346835	-0.0532821	-0.280809	-0.876788	-0.688044	-0.901246	-0.804946	-0.869467	-0.898458	-0.787795	-0.287496	-0.725382	-0.832468	-0.655888	-0.707887	-0.771626	-0.655077	-0.791366	-0.816289	-0.754243	-0.38934	-0.582302	-0.543476	-0.690478	-0.690823	-0.639837	-0.629846
cdc2	-0.211164	-0.285254	-0.408467	-0.0886199	-0.279241	-0.0669142	-0.360492	-0.408526	-0.49491	2.56588	-0.230166	-0.509851	-0.325502	-0.493112	-0.545113	-0.0420366	-0.175672	-0.0922894	-0.453459	-0.198817	-0.3234	-0.719344	1.10045	1.96935	-0.257549	-0.114158	0.291145	0.19831	1.35883	-0.126986	-0.0553909	-0.352969	0.0963829	-0.290579	-0.132703	0.917325
snoRNA:Psi28S-2149	-1	-0.745751	-1	0.627641	0.710336	0.931117	-0.698007	-0.490959	0.632242	1.30173	-0.0477302	-0.479662	-0.169027	0.26656	0.662788	-0.674682	-0.648639	0.185273	-0.241143	0.61142	0.41425	0.0536141	-0.119947	-0.223501	0.613648	0.643178	-0.337749	0.85201	-0.143044	0.211201	-0.306157	0.000411668	-0.535232	0.132976	-0.198269	0.0459181
CG15249	-0.737245	-0.798106	-0.844033	-1	-0.828138	-0.891216	-1	-1	-0.90482	-0.902894	-0.914949	-0.827592	-1	-1	-0.835723	-0.864367	-0.784378	-1	-1	-1	-0.743366	-0.856206	-0.953504	-0.903112	-0.671771	-0.93515	-1	-0.699964	-0.788276	-0.910401	-0.957236	-0.803107	-0.667462	-0.631949	-1	-0.830746
CG12723	-0.93429	-0.9261	-0.916042	-0.916784	-0.907251	-0.867864	-0.954904	-0.752058	-0.837384	-0.772829	-0.854335	-0.80081	-0.854373	-0.899842	-1	-0.90376	-0.870374	-1	-1	-0.915849	-0.904923	-0.94804	-0.935335	-0.882212	-0.928127	-0.867062	-0.925551	-0.909538	-0.960644	-0.936718	-0.897423	-0.881938	-0.94498	-0.970954	-0.952069	-0.898899
CG18190	-0.809359	-0.0920761	-0.178694	-0.0468969	0.113071	0.149572	-0.745992	-0.28513	-0.255669	2.54044	-0.0404111	0.230517	-0.330689	-0.478057	-0.623142	-0.645165	-0.496143	-0.475022	-0.691472	-0.686423	-0.524822	-0.262701	1.02878	2.17106	-0.281713	-0.458795	-0.0665925	-0.424257	1.21194	-0.460847	-0.446084	-0.303606	-0.022558	-0.421567	-0.436433	0.76811
CG6808	-0.164814	0.0619485	0.0440618	0.173027	0.307297	0.381086	-0.133881	0.0138778	-0.298345	0.453161	0.0809727	0.134717	0.081986	0.225688	-0.0249692	0.142185	0.273401	-0.00439547	-0.0700427	-0.222478	-0.13188	0.102801	0.260707	0.551065	0.0224577	-0.0505327	-0.0875962	0.107129	0.363335	0.10219	0.190556	-0.0176361	-0.143162	0.104177	0.0486577	0.0116601
CG8927	-0.0387591	-0.0479904	0.130091	-0.59127	0.130092	-0.0930106	-0.4994	-0.652695	-0.570912	0.674696	-0.451427	1.01085	1.07006	1.18524	1.19643	0.379693	0.632961	0.583264	-0.161843	-0.188028	-0.1199	-0.132032	0.431263	1.02483	0.245919	1.49747	0.665234	1.16204	1.34326	0.962134	-0.00489048	-0.396039	0.212021	-0.413266	-0.144742	0.343924
Muc18B	-0.598663	0.129998	0.340201	0.696824	1.70657	2.46955	2.1125	0.63179	0.821306	2.55819	1.51641	1.98719	-0.962818	-0.933567	-1	-1	-0.363449	-0.023267	-0.645654	-0.130679	-0.762908	-0.518045	-0.485799	-0.718942	-0.929302	-0.869192	-0.857073	-0.636749	-0.923601	-0.878087	-0.831092	-0.906335	-0.732344	-0.643916	-1	-0.919888
Hey	-0.651956	-0.628459	-0.60062	-0.70422	-0.779757	-0.614504	-0.860661	-0.737435	-0.733099	-0.637921	-0.374399	-0.67557	-0.809284	-0.963659	-0.73438	-0.873301	-0.621237	-0.832261	-0.648031	-0.88197	-0.744947	-0.742758	-0.787618	-0.682925	-0.732272	-0.771948	-0.64174	-0.688378	-0.627726	-0.691215	-0.76207	-0.781653	-0.680049	-0.909218	-0.615212	-0.792669
CG9870	0.987832	0.579587	1.13443	1.29695	1.27832	1.43812	1.01945	1.10617	1.06113	1.4812	1.2038	1.10739	1.04838	1.25181	1.17699	1.32221	0.963148	1.19664	1.02533	0.990531	1.19585	1.51621	1.33715	1.30359	0.848521	0.934287	1.06486	1.55448	1.09968	1.4769	1.16977	1.03994	1.22219	1.29647	1.21158	1.61693
CG42633	0.262126	0.433249	-0.0746442	0.543788	0.678205	0.417132	-0.559224	-0.278138	0.143062	0.428006	-0.09173	0.0393201	0.1827	0.175392	-0.0366426	0.856053	0.639687	0.237438	-0.711593	-0.355405	0.227516	-0.0524464	-0.138555	-0.308056	0.0879833	0.758638	0.115812	0.684877	0.199618	0.672072	0.919941	0.378229	0.194175	0.100551	0.240191	-0.347524
CG15730	-0.735829	-0.705287	-0.868145	-0.758678	-0.77389	-0.8559	-0.834306	-0.885058	-0.935484	-0.234155	-0.88704	-0.7558	-0.795024	-0.675077	-0.861059	-0.48431	-0.675488	-0.678388	-1	-0.867847	-0.851004	-0.703196	-0.625356	-0.448288	-0.712803	-0.812558	-0.630613	-0.543655	-0.660856	-0.797879	-0.784133	-0.702743	-0.753587	-0.790977	-0.7245	-0.710051
Takr99D	1.72715	1.69874	1.8618	1.71092	1.21282	1.73708	1.58645	1.6357	1.67973	1.24848	1.49258	1.51401	1.92064	2.11177	2.07241	2.1066	1.97572	2.16397	2.42983	2.2369	2.28427	2.33676	2.05808	2.10169	2.15897	2.11771	2.12413	2.19009	2.03018	1.9309	1.92021	2.09243	2.16398	1.94417	1.88101	2.1624
CG42237	-0.0280262	0.00504788	-0.0644718	-0.234385	-0.219554	-0.194954	-0.314412	-0.446455	-0.855288	0.705795	-0.270872	-0.273501	-0.134616	0.161015	-0.170191	0.167013	-0.338312	-0.249119	-0.0974151	-0.227528	-0.149436	-0.302615	-0.184348	-0.132958	-0.28638	0.158933	0.194005	-0.0514786	0.191501	-0.0304331	0.0282229	0.0916258	0.101554	-0.00786873	0.134165	0.034556
CG15373	-0.901524	-0.954739	-0.948509	-0.870899	-0.906297	-0.907158	-0.986178	-0.938249	-0.979274	-0.978843	-1	-0.936652	-0.976956	-0.979187	-0.927993	-0.842914	-0.904539	-0.974889	-1	-1	-0.980271	-0.89187	-0.941065	-0.703167	-0.934482	-0.904704	-0.910195	-0.91749	-0.929188	-0.905123	-0.954674	-0.913147	-0.966388	-0.913679	-0.970746	-0.974819
Ir40a	-0.740245	-0.652962	-0.559553	-0.444951	-0.752194	-0.611128	-0.799178	-0.732714	-0.581282	-0.814115	-0.785982	-0.661276	-0.580755	-0.334475	-0.457443	-0.195686	-0.701405	-0.833179	-0.737227	-0.821322	-0.587366	-0.951067	-0.838309	-0.456686	-0.675437	-0.317093	-0.783489	-0.472566	-0.681356	-0.513808	-0.363466	-0.371905	-0.369076	-0.614717	-0.290178	-0.714856
CG5768	-1	-0.891511	-1	-0.933661	-0.821693	-0.961357	-0.955321	-0.919814	-1	-0.931993	-0.883376	-1	-0.72448	-0.93308	-0.829545	-1	-1	-0.9592	-1	-0.738968	-0.905787	-1	-0.904928	-0.717027	-1	-1	-0.962644	-0.825966	-1	-1	-0.85689	-0.952056	-0.96343	-0.835371	-1	-0.880587
CG3292	-1	-0.721762	-0.679534	-1	-0.813738	-0.904748	-0.944055	-0.949082	-1	-0.686516	-0.722993	-0.801512	-0.82079	-0.656792	-0.92611	-0.420868	-0.933976	-0.875479	-0.878121	-0.798876	-0.863848	-0.935576	-0.919906	-1	-1	-0.943324	-0.953195	-0.809673	-0.688418	-0.960273	-0.94435	-1	-0.804369	-0.82799	-0.911721	-0.97415
Kebab	-0.223596	-0.274689	-0.0904486	0.124864	-0.131866	0.061664	-0.0889859	-0.267124	-0.0644608	0.735204	-0.0786694	-0.169307	-0.142113	0.0702173	-0.00831555	0.0508586	0.03043	0.176096	0.0269794	-0.195496	0.0146302	-0.146861	0.756059	1.33774	-0.23792	-0.0452548	-0.259379	-0.173504	0.400166	-0.0415956	-0.0772191	-0.0276236	-0.326748	0.0218585	-0.13321	-0.263369
CG43333	-0.935558	-0.963306	-0.958238	-0.983302	-1	-1	-1	-0.979744	-0.983224	-0.932687	-0.955615	-0.979212	-0.981345	-1	-0.985156	-1	-0.973652	-0.979669	-0.983411	-1	-0.899233	-0.961618	-0.898317	-0.92466	-0.982052	-0.988669	-0.981396	-1	-0.942495	-0.968636	-1	-0.98799	-0.990866	-1	-0.988105	-0.929869
Tsp33B	-0.937474	-0.92967	-0.796007	-1	-1	-1	-1	-1	-0.87471	1.78277	-0.834986	-0.959956	-0.964041	-1	-1	-0.740931	-0.949335	-0.96083	-1	-1	-0.969193	-1	1.36771	2.6577	-0.965396	-0.914353	-0.894984	-1	0.545412	-1	-0.888906	-1	-1	-1	-0.867321	-0.0868319
Mcm10	-0.441739	-0.561415	-0.572348	-0.608042	-0.717728	-0.3529	-0.762611	-0.60585	-0.784254	-0.368724	-0.37464	-0.447098	-0.667425	-0.634897	-0.673967	-0.638273	-0.490408	-0.677956	-0.620072	-0.587682	-0.505006	-0.529481	-0.131048	0.377032	-0.388812	-0.60587	-0.496503	-0.27218	-0.310489	-0.581241	-0.544134	-0.530856	-0.363332	-0.565638	-0.548042	-0.372194
CG13771	-0.951222	-0.866485	-0.87774	-0.855744	-0.781736	-0.887778	-1	-0.910685	-0.901798	0.799496	-0.912239	-0.93829	-0.891137	-0.901398	-0.715497	-0.89384	-0.884635	-0.881678	-1	-0.801196	-0.583012	-0.749723	-0.0385871	0.897753	-0.92065	-0.966146	-0.891426	-0.900193	-0.171775	-0.699436	-0.892066	-0.828975	-0.893655	-0.957334	-0.86287	-0.910119
CG34375	0.20616	0.201292	0.071516	-0.0209524	0.15104	0.00236755	0.0297526	0.0205607	-0.034265	0.0466122	0.271646	0.720209	-0.155721	0.00191539	-0.118169	0.26925	0.216032	0.117851	-0.0589263	-0.214681	0.0563413	-0.0821851	-0.0138936	0.0448796	-0.230806	-0.167969	-0.209044	-0.0798852	-0.139847	0.0762996	0.16433	0.0385632	0.0680841	-0.412334	-0.0622631	-0.00431953
CG12971	-0.508127	-0.7364	-0.568881	-0.697887	0.00939665	-0.32437	-0.332569	-0.382282	-0.60816	-0.154816	-0.0199436	-0.0959807	-0.422823	-0.665257	-0.454139	-0.539638	-0.590916	-0.749845	-0.792998	-0.615436	-0.769522	-0.474317	-0.594303	-0.754606	-0.645736	-0.724539	-0.842403	-0.602365	-0.586929	-0.47414	-0.843316	-0.754061	-0.774164	-0.384667	-0.400299	-0.502905
CG30161	-0.916514	-0.952327	-1	-0.834626	-0.845305	-0.855817	-0.887385	-0.94775	-1	0.126679	-0.923675	-1	-1	-0.833226	-0.924192	-0.937745	-0.932258	-0.848068	-0.915483	-0.927973	-0.918578	-0.75203	0.754284	1.61522	-0.781827	-0.780246	-0.951969	-0.885326	0.0431107	-0.91958	-0.887967	-0.768035	-0.73842	-0.608234	-0.880477	-0.666743
snoRNA:Me28S-C1237	0.790967	-0.646667	0.179866	0.324725	-1	-0.341192	-0.582838	-0.313594	-0.411209	-1	-1	-0.607474	-1	0.00879362	0.476401	0.671477	-1	-0.615093	-1	1.6027	0.421443	-0.527761	-0.0231305	-1	-0.655507	-0.251943	-1	0.24288	-1	-1	-1	-1	-1	-1	-0.223084	-0.614152
CG12911	-0.216001	-0.282281	-0.152521	-0.21714	-0.271265	-0.581985	-0.546972	-0.665787	-0.646954	-0.538042	-0.294335	-0.328702	-0.46831	-0.577448	-0.274266	0.0641392	0.338665	-0.257687	-0.427226	-0.193014	-0.147089	0.260989	-0.106161	-0.102462	-0.485371	-0.416546	-0.370581	-0.454558	-0.415212	-0.395003	-0.563478	-0.212086	-0.547917	-0.724953	-0.352056	-0.642574
Vha14-2	-0.917723	-0.820637	-0.766006	-0.957479	-0.960336	-0.903704	-0.91596	-0.874577	-0.836229	1.08824	-1	-0.973348	-0.952545	-0.957104	-1	-0.969001	-1	-0.948326	-1	-1	-0.939404	-0.872539	0.847197	1.9166	-0.784848	-0.942695	-0.862438	-0.914408	0.258904	-0.920747	-0.943731	-0.96934	-0.976647	-0.859288	-0.747284	-0.780217
CG13676	0.314177	0.449447	0.374627	-0.107876	-0.356367	0.0598418	0.272755	0.0402854	0.268885	-0.425319	0.1733	0.398136	0.487468	0.569407	0.635353	0.682967	0.568547	0.770613	1.00896	0.867687	0.785848	0.856569	0.615897	0.66694	0.665724	0.522192	0.496945	0.498486	0.138043	0.451591	0.618682	0.482059	0.591337	0.605241	0.513998	0.683861
CG13869	-0.61732	-0.529667	-0.458282	-0.744771	-0.410264	-0.657499	-0.791819	-0.870357	-0.791419	-1	-0.647228	-0.688179	-0.938886	-1	-0.904048	-0.921105	-0.914194	-0.93348	-1	-0.823027	-0.329092	-0.916259	-0.542111	-0.257252	-0.941169	-0.789239	-0.939051	-0.546778	-0.508807	-0.803211	-0.729935	-0.921954	-0.827898	-1	-0.849307	-0.869546
Orc6	0.235058	0.480951	0.770019	0.460313	0.711698	0.944092	0.295566	0.348997	0.00956631	0.668085	0.559245	0.840335	0.363231	0.549942	0.123618	0.711079	0.915862	0.40611	0.426278	0.334207	0.245028	0.683884	0.559064	0.438892	0.361606	0.427518	0.53294	0.759714	0.543995	0.788783	0.391421	0.314153	0.541682	0.584902	0.548545	0.31764
CG8100	-0.614784	-0.696381	-0.521231	-0.513424	-0.541827	-0.529405	-0.196958	-0.313837	-0.358698	-0.624649	-0.644867	-0.324347	-0.7378	-0.789128	-0.890053	0.862948	0.321632	-0.905197	-0.53914	-0.238676	-0.635292	-0.668801	-0.181595	-0.209431	-0.852258	-0.759835	-0.784025	-0.777236	-0.874593	-0.883446	-0.903551	-0.652862	-0.914863	-1	-0.911328	-0.868604
CG9826	-0.789839	-0.620735	-0.596579	-0.531525	-0.40881	-0.36464	-0.382462	-0.744006	-0.707394	-0.0851041	-0.574305	0.173474	-0.540259	-0.462357	-0.607763	-0.871894	1.53192	0.0235342	-0.637268	-0.429434	-0.666792	-0.770075	-0.348506	-0.50536	-0.555352	-0.416903	-0.522758	-0.665065	-0.467224	-0.835579	-0.562499	-0.72903	-0.376405	-0.682259	-0.677958	-0.840039
spz4	-0.544895	-0.5856	-0.495017	-0.592368	-0.846713	-0.751021	-0.387987	-0.518104	-0.535493	-0.80968	-0.579683	-0.540644	-0.434111	-0.331416	-0.219661	-0.415882	-0.577661	-0.582932	-0.308813	-0.000328567	-0.167793	-0.0326721	-0.362554	-0.224118	-0.616052	-0.495093	-0.624863	-0.469131	-0.798278	-0.685797	-0.441992	-0.295711	-0.272053	-0.579453	-0.615369	-0.724884
Osi17	-0.0591567	0.167688	-0.0231335	-0.207671	-0.580803	-0.185201	-0.317754	-0.152772	-0.387626	-0.30028	-0.0758865	-0.127823	-0.243399	-0.280018	-0.40413	-0.357272	-0.209978	-0.311551	-0.288742	-0.0943183	-0.30303	-0.193365	-0.297837	-0.200454	-0.304901	-0.223518	-0.276723	-0.32759	-0.41706	-0.146169	-0.272246	-0.341271	-0.226976	-0.184048	-0.335693	-0.402853
snoRNA:Psi18S-1854c	-1	-0.518245	-0.319544	-0.762254	-1	-0.728925	-0.43538	-0.275098	-0.217608	0.0721572	-0.285351	-0.467234	-0.736623	-0.554793	-0.60131	0.202159	-1	-0.477119	-1	-0.318261	-0.575016	0.0748194	-0.571555	-0.757142	1.71957	-1	-0.737289	-0.207425	-0.726666	-0.579684	-0.60207	-0.401083	-0.166575	-0.0585957	-0.405817	-0.0922791
CG18281	-0.838795	-0.840797	-0.963903	-0.81658	-0.960054	-0.834358	-0.861592	-0.973843	-0.915202	-0.754604	-0.783744	-0.774698	-0.775456	-0.956799	-0.853267	-0.908296	-0.868543	-0.94796	-0.725571	-0.733158	-0.861431	-0.725792	0.170063	-0.664214	-0.954002	-0.886799	-0.818129	-0.859083	-0.745482	-0.920191	-0.836271	-0.796564	-0.930559	-0.824974	-0.71993	-0.897457
CG33288	0.084209	-0.100929	-0.207837	0.380778	-0.0270955	0.270023	-0.0469751	-0.144763	-0.0021324	0.173104	-0.169473	0.128529	0.220209	0.286977	0.241645	0.70506	0.461594	0.248276	-0.339409	-0.235296	0.299911	0.155684	0.120458	0.389953	-0.0363926	0.47835	0.150585	0.58053	0.108012	0.52924	0.501654	0.379018	0.539055	0.0174415	0.240694	-0.133955
upd2	0.0346951	0.788376	0.0242075	-0.0980858	-0.70823	0.0126145	-0.637315	-0.336177	-0.405297	-0.0914146	0.165579	0.272631	-0.91627	-0.924224	-0.966148	-0.841106	-0.940213	-0.908926	-0.820169	-0.90565	-0.91067	-0.858359	-0.909855	-0.92317	-0.939113	-1	-0.978666	-0.94841	-0.850857	-1	-0.869385	-0.893301	-0.918223	-0.873644	-1	-0.90868
mei-218	-0.89176	-0.90792	-0.84484	-0.79724	-0.617666	-0.774073	-0.786794	-0.841977	-0.899943	-0.823237	-0.835488	-0.812712	-0.889088	-0.815752	-0.791827	-0.820314	-0.920591	-0.860312	-0.890436	-0.870745	-0.815179	-0.864987	-0.838047	-0.813285	-0.848109	-0.852578	-0.770213	-0.74984	-0.772161	-0.734061	-0.796654	-0.866499	-0.790876	-0.816025	-0.860314	-0.866311
CR41440	-0.544851	-0.725974	-0.199296	-0.411063	-0.230472	-0.338536	-0.581019	-0.454775	-0.674315	0.351267	-0.160625	-0.228463	1.01058	0.60152	0.644964	0.795325	0.997549	0.468345	0.756615	0.251671	0.254427	1.26146	0.829553	1.49653	0.663792	0.995623	0.602866	0.486876	0.645197	0.27957	1.06493	1.09022	1.19395	1.38096	0.434557	0.388402
CG4914	-0.763431	-0.861859	-0.893817	-0.796657	-0.809631	-0.767774	-1	-0.947905	-0.834362	-0.8715	-0.961448	-0.86992	-0.975791	-1	-1	-1	-1	-1	-0.836114	-1	-0.958837	-1	-0.979078	-0.955984	-0.953784	-0.806501	-1	-0.970554	-0.901718	-0.959351	-0.924576	-0.908855	-1	-1	-1	-0.94757
snoRNA:Psi28S-1232	1.5573	1.30343	0.884666	0.0477275	-0.266158	-0.135299	0.279056	0.0567669	0.948413	-0.209364	0.690587	0.957155	1.06413	1.40799	0.367518	0.61663	-0.642019	0.332297	0.641836	0.4851	0.757406	0.0694349	0.766938	0.968111	0.542407	0.663897	0.756929	1.21252	0.518064	1.00806	-0.161324	0.18734	0.967674	1.55434	0.712381	1.01597
CG14499	3.54548	0.273133	1.71594	2.00376	2.99805	3.73207	-0.501014	1.51594	-0.226139	-0.139804	1.375	1.10536	-0.864161	-0.560198	-1	-1	-1	-0.596185	-0.766757	-1	-1	-0.731519	-0.826435	-0.875174	-1	-0.27056	-0.470863	-0.836104	0.856851	-1	-1	-1	-0.745739	-0.796813	-1	-0.924147
Ptth	-0.254905	0.118385	0.656602	0.308473	1.0263	0.592805	0.619644	0.419077	0.31253	1.21275	0.965908	0.723098	0.703277	0.47925	0.631878	-0.0518839	0.867868	-0.294991	-0.33382	-0.417001	-0.332518	-0.0648457	0.744846	1.15406	-0.854818	-0.736896	-0.447626	-0.818424	-0.244839	-0.6986	-0.615442	-0.386248	-0.75147	-0.626985	-0.902368	-0.555235
ida	1.30571	1.19664	1.31521	1.4702	1.39802	1.49848	1.33685	1.28427	1.22762	1.68424	1.49102	1.3367	1.36329	1.42539	1.53895	1.47325	1.36617	1.44814	1.45705	1.43967	1.34563	1.30455	1.50694	1.679	1.47471	1.58373	1.43014	1.53151	1.84014	1.63482	1.5132	1.44036	1.43249	1.35625	1.34732	1.63415
Mt2	1.37544	1.0939	1.18737	1.38595	1.78838	1.50538	1.42046	1.37602	1.42676	1.72656	1.46326	1.4986	1.46168	1.34786	1.47503	1.25989	1.70739	1.43049	1.41356	1.36314	1.39159	1.04616	1.58875	1.36431	1.51875	1.54112	1.25544	1.73134	1.96903	1.86196	1.51167	1.34719	1.40769	1.48967	1.44563	1.70856
CG17005	-0.793332	-0.91879	-0.907769	-0.926408	-0.965242	-0.915414	-0.902439	-1	-0.962561	1.07754	-0.870865	-0.88689	-0.898169	-0.925765	-0.966846	-0.946193	-1	-1	-0.790887	-0.878014	-0.929563	-0.915114	1.0554	2.10518	-0.723757	-0.877501	-0.878959	-0.87684	-0.029334	-0.864068	-0.841691	-0.870453	-0.919883	-0.936757	-0.947281	-0.671252
snoRNA:Psi28S-3327a	-0.565444	0.370591	-0.0709897	0.172515	0.738679	0.407979	0.657864	-0.275098	0.659898	1.22504	1.07225	0.693096	0.264232	0.664055	-0.28928	0.202159	0.43395	0.568372	0.943996	-0.61923	0.0198253	-1	0.252857	0.592964	1.22042	-0.0212501	0.136446	0.150737	0.808662	0.428198	0.0783745	0.612738	-0.742413	1.12921	-0.672533	0.0670186
CG13837	0.424518	0.556262	0.396251	0.574394	0.689744	0.511845	0.509005	0.823187	0.733327	0.652553	0.0944072	0.368524	0.645252	0.920918	0.611528	0.167766	0.201651	0.607675	0.51297	0.327792	0.999055	0.934997	0.692952	0.768193	0.467762	1.03004	0.344599	0.365236	0.645902	0.089093	0.670663	0.412327	0.713948	0.722899	0.783212	0.811308
Doc3	0.000913884	0.0329914	0.373212	-0.390876	-0.494493	-0.00930363	-0.0121548	-0.476402	-0.292143	0.0115938	-0.19103	-0.16332	0.15378	0.145041	-0.358414	0.00193179	-0.0537911	-0.238409	0.152349	-0.206019	-0.0709231	-0.278487	-0.166341	0.0638992	-0.267293	-0.446483	-0.350197	-0.170555	-0.107522	-0.300972	-0.275823	-0.0863484	-0.0859041	-0.401553	-0.34336	-0.1028
CG43645	-0.470601	0.16995	-0.535282	0.801362	0.634905	0.498239	-1	-0.368764	-0.459931	-0.450533	-1	-0.116295	-0.410023	-0.0649801	-1	-1	-0.221376	0.0716892	0.698133	-0.534342	0.0566786	-0.568235	-0.715414	-0.0551917	-0.0204064	-0.310979	-0.675865	-0.61284	-0.663036	-0.110005	-0.736607	0.390969	-0.421692	-1	-0.597954	0.251693
CG32260	-0.171741	-0.434715	-0.340938	-0.149359	-0.126756	-0.267037	-0.371947	-0.360729	-0.331601	-0.164277	-0.190277	-0.0814457	-0.53023	-0.0350329	-0.416556	0.23374	-0.195155	-0.0610214	-0.535299	-0.399793	-0.324326	-0.384986	-0.559731	-0.321709	-0.394945	-0.590536	-0.501997	-0.23887	-0.424741	-0.256671	-0.353696	-0.0348649	-0.214678	-0.477217	-0.390302	-0.371832
Mcm5	0.416004	0.345802	0.641362	0.25905	0.0358034	0.343003	0.0861993	0.244196	0.0784285	0.681202	0.425734	0.390781	0.367751	0.396868	0.150345	0.288801	0.269787	0.00845572	-0.108575	0.0260203	0.321172	-0.0607518	0.223312	0.454431	0.576824	0.458797	0.551103	0.293704	0.552178	0.56248	0.34192	0.467652	0.574699	0.26523	0.372055	0.26476
CG10005	-0.116224	0.312009	0.292258	-0.435727	0.169243	-0.10779	-0.564974	-0.0296986	-0.138017	0.362385	-0.0424188	0.0731089	-0.381656	-0.340514	0.0447851	-0.180647	-0.844674	-0.161831	-0.0713514	-0.281409	-0.226591	-0.434032	-0.201679	-0.126026	-0.0931116	-0.525908	-0.217252	-0.219892	-0.0384156	-0.462136	-0.23439	-0.611164	-0.321379	-0.308672	-0.404888	-0.475058
Su(Ste):CR42407	-0.952143	-0.868934	-0.842109	-0.927453	-0.910394	-1	-0.935169	-0.884276	-0.857744	-1	-1	-0.969407	-0.793671	-0.950803	-1	-1	-0.961259	-1	-1	-0.918709	-1	-1	-0.976262	-0.974841	-1	-0.902575	-0.972612	-0.966604	-0.888882	-0.953922	-0.956687	-0.930467	-0.822017	-0.958141	-0.833603	-0.9406
CG33252	-0.493507	-0.375065	-0.400604	-0.179846	-0.0215806	-0.141866	-0.384377	-0.50517	-1	2.41617	-0.650671	-0.245343	-0.538887	-0.362001	-0.0551385	-0.262663	-0.132689	-0.134972	0.148586	-0.0518908	-0.445701	-0.226621	1.47283	2.41736	0.0612393	-0.457654	-0.504606	-0.336371	1.0111	-0.45154	-0.276206	-0.518877	-0.584079	-0.29572	-0.393383	0.0344271
CG11674	-0.830072	-0.901724	-0.762926	-0.939989	-1	-0.930975	-1	-0.892468	-1	-0.879468	-0.946196	-0.925558	-0.838161	-1	-0.661849	-0.872336	-0.906105	-1	-1	-1	-1	-0.908359	-0.886325	-0.879737	-0.786051	-0.77027	-0.778756	-0.879922	-0.710105	-0.943286	-0.895257	-0.833927	-0.726718	-0.948462	-0.835441	-0.823911
CG14841	-1	-1	-1	-0.856031	-0.742278	-1	-0.950267	-0.954745	-0.925881	0.705097	-1	-0.822615	-1	-1	-1	-0.894054	-0.941285	-0.867812	-1	-0.820242	-0.96426	-1	0.910635	2.10401	-0.959863	-1	-1	-1	0.405764	-0.800135	-0.93441	-1	-0.919679	-1	-1	-0.670483
CG4613	-0.6025	-0.535176	-0.577843	-0.469305	-0.0709436	-0.358772	-0.509147	-0.547708	-0.313684	-0.542509	-0.184931	-0.511335	-0.19626	-0.425276	0.0295374	-0.281297	-0.286333	-0.375134	-0.642619	-0.652236	-0.394313	-0.50874	-0.608158	-0.656454	-0.415176	-0.17903	-0.397601	-0.558601	-0.209642	-0.0621054	-0.22043	-0.393598	-0.661288	-0.498864	-0.482792	-0.681445
CG43894	-0.541578	-0.589026	-0.339004	-0.358454	-0.447772	-0.487845	-0.601022	-0.50921	-0.635643	-0.713129	-0.696066	-0.528844	-0.3964	-0.278258	-0.697976	-0.446945	-0.5987	-0.698508	-0.612893	-0.597925	-0.458328	-0.690634	-0.873041	-0.834014	-0.809779	-0.561602	-0.645029	-0.666912	-0.795098	-0.655247	-0.602896	-0.59387	-0.637087	-0.707864	-0.860293	-0.85992
CG14317	-0.948235	-0.941747	-0.955511	-0.871576	-0.903188	-0.852798	-0.929907	-0.816425	-0.947006	-0.893789	-0.819519	-0.841574	-1	-1	-1	-1	-1	-1	-0.800893	-1	-1	-0.959108	-0.924251	-1	-0.888848	-0.828641	-0.91284	-0.764199	-0.666386	-0.901977	-0.953144	-0.961927	-0.942537	-0.954715	-1	-0.815298
CG13931	0.109242	0.138083	0.0227671	-0.0946541	0.828053	0.0246775	-0.161197	-0.244863	0.0307296	-0.253553	-0.150314	-0.204736	0.522478	0.797352	0.529324	0.137022	0.134489	-0.0802978	-0.0112205	0.184552	0.315463	0.359818	0.412633	-0.00725027	-0.162837	0.560584	-0.160722	-0.432319	0.125211	0.0489826	0.132366	0.150486	-0.28312	-0.24562	-0.0442026	-0.013955
Ir52d	-0.88536	-0.955825	-0.869685	-0.846315	-0.78945	-0.844917	-0.946793	-1	-1	-1	-0.766132	-0.833126	-0.912083	-0.845009	-0.862677	-0.570368	-0.763695	-0.750939	-1	-1	-0.888165	-0.851422	-0.869174	-0.899835	-0.91534	-0.919884	-0.809718	-0.512542	-0.645965	-0.722352	-0.737821	-0.663906	-0.631176	-1	-0.761378	-1
CG8642	-0.188076	-0.0267086	-0.0103984	0.0271965	0.188671	0.198073	-0.0775566	0.176857	0.423415	-0.187988	-0.0979195	0.323609	-0.20922	0.125988	-0.222661	-0.0199101	0.0242039	0.0292932	-0.38432	-0.303108	-0.217313	-0.448772	-0.238888	-0.24694	-0.343605	0.225394	0.158329	0.187321	-0.152565	0.295155	0.295431	-0.0455917	0.0034528	-0.269274	-0.32613	0.0599538
snoRNA:lola-d	-0.55445	-1	-1	-0.0573235	-0.573768	-0.488459	-1	-0.0770533	-0.545215	-1	-1	-1	-1	-0.197364	-1	-1	-1	-0.707413	-1	-1	-0.56423	-0.638512	-1	-0.352749	-0.518055	-1	-0.306843	-0.412668	-1	-1	-0.591878	-0.661026	-0.318612	1.52038	-1	-1
CG34199	-0.803638	-0.545812	-0.912542	-0.624538	-0.36399	-0.621369	-0.623662	-0.706447	-0.542329	-0.182562	-0.585958	0.826942	0.751811	0.523309	0.543287	0.683645	0.338891	0.0925465	1.0097	0.394382	-0.0561632	0.817363	0.304636	-0.314373	0.862795	0.517233	0.599253	1.51287	0.930626	1.4003	0.710489	0.853926	0.955533	0.718423	0.37043	0.982843
CG33928	0.395748	-0.179026	-0.235142	0.0116157	0.0834835	-0.240564	-0.200092	-0.410314	-0.123955	-0.350571	-0.419019	-0.634948	0.0949478	-0.542849	-0.135515	0.420592	-0.803064	0.00979129	-0.455136	-0.791175	-0.156108	-0.10794	-0.186236	-0.308919	-0.46691	0.248887	-0.260627	-0.473464	-0.190216	0.0331084	-0.0734015	-0.0523663	-0.796864	-0.224394	-0.215361	-0.205813
ey	0.713275	0.866538	0.856833	0.745762	0.375862	0.876444	0.761545	0.909484	0.906405	-0.0318529	0.852641	0.5899	1.08629	1.1701	1.17094	1.09555	0.946895	1.34239	1.43388	1.27099	1.24513	1.19757	1.03734	1.15343	1.0436	0.863881	0.894471	0.840698	0.598734	0.545401	0.883378	0.891757	0.828459	1.12977	0.984211	0.839391
cn	-0.89361	-0.842841	-0.879017	-0.909133	-0.965456	-0.95735	-0.856879	-1	-1	-0.720958	-0.90267	-0.866095	-0.918464	-0.926215	-0.812725	-0.894955	-0.913546	-0.807599	-1	-0.968717	-0.964571	-0.862	-0.861995	-0.705807	-0.79361	-0.878232	-0.918683	-0.808815	-0.874566	-0.832983	-0.769937	-0.643746	-0.920368	-0.876909	-0.824377	-0.827301
CG11131	-0.900544	-0.835544	-0.873326	-1	-0.905363	-0.970038	-0.965341	-1	-1	-0.466191	-1	-0.874745	-0.808015	-0.897808	-0.954116	-1	-0.88046	-0.791838	-0.899323	-0.956427	-0.975129	-0.921164	0.434338	0.0562615	-1	-0.832395	-1	-0.896561	-0.697884	-0.904178	-0.866784	-1	-0.916567	-0.95575	-0.963154	-0.968272
CG31274	-0.954909	-0.949244	-1	-0.931613	-0.915504	-0.973313	-0.880274	-0.814036	-0.953837	-0.952886	-1	-0.942935	-0.875075	-1	-1	-1	-0.859251	-0.971816	-1	-0.88651	-0.956039	-0.964398	-0.933948	-0.863342	-0.879646	-0.968717	-0.92396	-1	-0.774022	-0.914442	-0.939217	-0.934458	-0.87795	-0.960566	-0.967173	-0.812895
Cyp49a1	1.075	1.12429	1.20274	0.891051	0.697804	1.20986	0.954574	0.928485	0.688731	0.539546	0.693096	0.952232	1.45252	1.09399	1.20232	1.58528	2.33385	1.711	1.00289	1.21472	1.47346	1.21717	0.952608	1.33623	1.03352	1.10772	0.919686	1.20732	1.01838	1.36787	1.06024	0.895664	0.874274	0.757159	0.66831	0.829578
eg	0.190855	-0.0629841	-0.0957971	0.0519346	-0.185419	-0.0549559	0.182657	0.126824	0.194777	0.00889267	-0.0870059	0.106719	-0.119249	0.0842492	0.126763	0.0530877	-0.0169543	0.159196	-0.246086	-0.110314	0.0844154	-0.230395	0.025607	-0.0110352	-0.00362819	0.0952151	0.0225944	-0.0306406	-0.28067	0.14479	0.20251	0.404776	0.334071	0.45019	0.200682	0.0814127
CR43628	-0.0240061	-0.113817	-0.0126936	-0.287284	-0.341565	-0.450716	-0.167395	0.0610136	-0.146431	-0.133009	-0.522914	-0.528157	1.08569	1.07199	1.02898	0.919702	1.01243	0.6285	0.909391	0.614444	0.693255	1.11297	1.14325	1.07486	0.6685	0.806342	1.13036	0.428129	0.421751	0.827898	0.466633	0.175275	0.439847	0.741805	0.354893	0.712057
CG18675	-0.54874	-0.572222	-0.34267	-0.557727	-0.804206	-0.717902	-0.777424	-0.796411	-0.713832	0.577201	-0.644895	-0.674848	-0.768104	-0.712737	-0.7111	-0.602614	-0.769961	-0.819711	-0.753956	-0.821784	-0.876368	-0.745809	1.18186	1.87203	-0.676237	-0.513066	-0.514615	-0.624288	0.530468	-0.801839	-0.960647	-0.968039	-0.882177	-0.785542	-0.84824	-0.615837
CG13870	-0.593039	-0.775385	-0.644564	-0.265003	-0.424532	-0.43526	-0.380235	-0.332406	-0.554719	1.09273	-0.570547	-0.448185	0.0800893	0.35848	0.307784	0.279286	0.14099	0.263411	0.406078	0.234805	0.596802	0.21727	1.64379	2.38124	0.462763	0.614753	0.68111	0.359	1.44579	0.934418	0.637113	0.733715	0.581888	0.614596	0.273503	0.525242
Obp56c	-1	-0.845795	-0.919804	-0.472125	-0.827919	-0.891074	-0.935899	-1	-1	-0.645118	-0.914837	-1	-0.894337	-1	-1	-0.374359	-0.483521	-0.885145	-1	-1	-0.823718	-0.789084	-0.701829	-0.902985	-0.948217	-0.756143	-1	-0.754881	-0.838159	-0.910283	-0.688486	-0.865626	-0.710171	-1	-0.6326	-1
CR43431	-0.326362	-0.172634	-0.10212	0.0518787	0.309453	0.162414	0.127792	-0.251441	0.0224841	-0.141078	-0.0601037	0.207227	0.171215	-0.00818331	-0.0339755	0.235905	0.242914	-0.0239273	-0.0535254	0.38556	0.369457	0.467377	0.247003	0.0191153	0.280994	0.0961386	-0.0273612	0.183552	-0.0561529	0.130455	0.137211	0.0971082	0.278356	0.332449	-0.0520255	0.0982448
snoRNA:Psi28S-2444	-0.536866	-0.720864	-1	0.34678	0.285897	-0.468717	-0.668958	-0.231919	-0.527323	-1	-0.242637	-0.433369	0.197958	-0.525623	-0.57476	0.263576	-0.615441	1.10197	-1	-0.277062	0.411474	-0.325733	0.419924	-0.00927152	0.166582	-0.665023	-0.71893	0.210476	-0.25676	0.296869	0.243786	-0.363863	-0.118681	-1	-0.650171	0.12389
St4	-1	-1	-0.944569	-0.902574	-0.938702	-0.85272	-1	-0.92061	-0.870927	-0.484012	-0.941105	-0.918569	-1	-0.933748	-1	-1	-1	-0.959611	-1	-0.944441	-1	-1	-0.580878	-0.221829	-1	-1	-0.926966	-0.911248	-0.749268	-0.878413	-0.970521	-0.952538	-1	-1	-0.952988	-0.881758
Sep2	4.38232	4.49372	4.76973	4.72444	4.70639	5.01994	4.65802	4.83817	4.68816	4.80046	4.77685	4.94217	4.4105	4.4208	4.43126	4.59843	4.64746	4.53206	4.55238	4.64373	4.53956	4.53728	4.54422	4.47461	4.25349	4.28155	4.22329	4.54429	4.46721	4.49575	4.51121	4.46017	4.46555	4.36795	4.34848	4.32923
CR43792	-1	-1	-0.88359	-0.678292	-1	-0.842575	-0.90672	-0.83474	-0.736015	-0.219708	-0.762695	-0.752842	-1	-0.618763	-0.76422	-0.715877	-1	-0.61644	-0.863451	-0.883325	-0.868366	-1	-0.432293	-0.137594	-1	-0.508307	-0.468316	-0.731938	-0.631653	-1	-0.820021	-0.483456	-0.715411	-0.486199	-0.80828	-0.914465
CG2129	1.35703	1.26637	1.37378	1.46305	1.20647	1.47573	1.23483	1.2918	1.41893	1.66256	1.44619	1.55283	1.33497	1.67124	1.18812	1.62402	1.63627	1.43199	1.37858	1.2295	1.36431	1.36915	1.3346	1.53858	1.18803	1.04136	1.40912	1.31639	1.54496	1.4797	1.36923	1.37761	1.0711	1.31677	1.50314	1.4066
CG16886	-0.757906	-0.675922	-0.7473	-0.92723	-0.817318	-0.837294	-0.830727	-0.829211	-0.803971	-0.854475	-0.922019	-0.776334	-0.983407	-0.884278	-1	-0.855714	-0.843378	-0.91176	-0.913656	-0.81153	-0.876955	-0.746963	-0.875845	-0.984804	-0.921893	-0.921299	-0.842495	-0.74017	-0.851483	-0.815098	-0.910225	-0.781579	-0.831115	-0.901206	-0.877924	-0.828157
sca	0.835438	0.740379	0.761797	0.494883	0.101755	0.501359	0.690489	0.521723	0.536093	0.0027661	0.68367	0.546374	0.830992	0.666742	1.02377	0.757661	0.924212	0.967252	1.1975	0.995562	0.954745	0.944316	0.807981	0.931696	1.08247	0.947667	1.01339	0.87436	0.509871	0.826472	1.1024	1.01735	1.18123	1.23356	1.04351	0.9821
CG15614	-0.5963	-0.781054	-0.679082	-0.607476	-0.914105	-0.703848	-0.937875	-0.91598	-0.907603	-0.774959	-0.765282	-0.68245	-0.648391	-0.622725	-0.803134	-0.718926	-0.726841	-0.620423	-0.556712	-0.678401	-0.640235	-0.702871	-0.58475	-0.655775	-0.640305	-0.632824	-0.756964	-0.81792	-0.657132	-0.716089	-0.767261	-0.838851	-0.676455	-0.740233	-0.516709	-0.664792
mir-4984	-1	-1	-0.246448	-0.311391	-0.535282	-0.443643	-0.372206	-0.00673765	-0.136466	-1	-0.551263	-0.67321	-1	-1	-1	-0.625795	-1	-1	-1	-0.245059	-0.525016	-0.295401	-0.740834	-0.496806	-0.71398	-0.129186	-1	-1	-1	-1	-0.215054	-1	-1	-1	-1	-0.416402
CG10858	-0.949487	-0.943154	-0.95659	-0.923463	-1	-0.912041	-1	-1	-1	-1	-0.953865	-0.967698	-0.808275	-0.948073	-1	-0.662293	-0.735426	-0.937487	-1	-1	-0.857023	-0.883467	-0.950294	-0.847473	-0.917857	-0.964935	-0.942729	-0.831735	-0.854996	-1	-0.954279	-0.926638	-0.863699	-1	-0.858141	-0.764118
CG1231	0.27811	0.610684	0.375789	0.534412	0.635062	0.683356	0.343448	0.635842	0.779368	0.242463	0.450453	0.478237	0.818246	0.731564	1.10378	0.803534	1.07951	0.717114	1.04516	0.6046	1.05119	1.10516	1.18398	0.848715	0.796416	0.962524	1.04507	0.90643	0.869824	1.20756	0.694137	0.874223	0.973881	0.925602	0.782173	1.22515
Cht6	-0.155758	-0.189824	-0.0276288	-0.39525	-0.837213	-0.349799	-0.353404	-0.420534	-0.174061	-0.663198	-0.217968	-0.128972	-0.539354	-0.454917	-0.458501	-0.531241	-0.490422	-0.411233	-0.384916	-0.56292	-0.538653	-0.478545	-0.432041	-0.435598	-0.0562797	-0.106766	0.137752	-0.282886	-0.623163	-0.439382	-0.204477	-0.315203	-0.235064	0.078097	-0.00463795	0.0936514
Cpr65Ec	-1	-1	-1	-1	-0.779447	-1	-0.91697	-0.852505	-0.876938	-0.459441	-0.889923	-0.848802	-1	-1	-1	-1	-1	-1	-1	-0.896054	-0.882662	-0.650995	-0.881602	-0.602268	-0.932842	-0.836426	-0.93043	-0.835557	-0.173035	-1	-0.694687	-0.672816	-0.687617	-0.796143	-0.410989	-1
snoRNA:Psi28S-1135d	-1	-1	-1	-0.765344	-1	-1	-0.694175	-0.7196	-0.561792	-1	-0.60381	-0.473522	-1	-1	-0.606225	-1	-1	-1	-1	-0.623952	-1	-0.652086	-1	-0.760293	-0.184644	-1	-0.740675	-0.688942	-1	-1	-1	-1	-0.341744	-0.618741	-0.412693	-1
CG6118	-0.883859	-0.741955	-0.832387	-0.699059	-0.859368	-0.665908	-0.646741	-0.763744	-0.683497	-0.677561	-0.567592	-0.685575	-0.756028	-0.682298	-0.729697	-0.831229	-0.721883	-0.809208	-0.78878	-0.657944	-0.717949	-0.882541	-0.765229	-0.700028	-0.78895	-0.789478	-0.715764	-0.622208	-0.79041	-0.950967	-0.830782	-0.878769	-0.819592	-0.738639	-0.834514	-0.856642
CR43687	-0.592255	-0.914037	-0.542331	-1	-0.728765	-0.671053	-0.625128	-1	-1	-0.154533	-0.623878	-0.499121	-0.61024	-0.846879	-0.626185	-0.784426	-0.878515	-1	-1	-0.446389	-0.925425	-1	-0.924741	-0.577002	-0.916386	-0.70662	-0.198954	-0.705128	-0.596133	-0.856269	-0.740874	-0.600811	-0.759211	-0.638143	-0.788557	-0.653636
ase	-0.947912	-0.970395	-1	-0.946922	-0.975025	-0.969141	-1	-0.983675	-0.973092	-0.945581	-0.952424	-0.902276	-1	-1	-0.976181	-0.942282	-1	-0.951391	-0.97339	-1	-0.974383	-1	-1	-0.945705	-0.985538	-0.911234	-0.985009	-0.91075	-0.984347	-0.949845	-0.896003	-0.961689	-0.956419	-0.977036	-0.925079	-1
CG11905	-0.955456	-0.958095	-0.961731	-0.977125	-0.916515	-0.94775	-0.929812	-0.936091	-0.924776	-0.727798	-0.972756	-0.828548	-0.908451	-0.93926	-0.796551	-0.792444	-0.806685	-0.962999	-0.882729	-0.974315	-0.942382	-0.930499	-0.81247	-0.768007	-0.757164	-1	-0.957781	-0.91858	-0.839265	-0.957114	-0.973002	-0.96726	-0.811588	-0.973913	-0.956923	-0.972083
CR17025	0.0813997	0.22936	0.0765547	0.130537	0.171836	0.359679	-0.0749594	-0.163962	0.0462296	0.0056529	0.198737	0.1642	0.676691	0.373726	0.539323	0.279113	-0.186595	0.507977	0.330898	0.444624	0.764645	0.261429	0.736881	0.3936	-0.311415	0.0238271	-0.229157	-0.143883	-0.178106	-0.0351212	-0.168686	-0.261515	-0.254015	-0.449156	-0.2671	-0.159817
CG10151	0.424298	0.440979	0.373389	0.441711	0.483059	0.431641	0.480898	0.484189	0.39865	1.66761	0.510424	0.562822	0.918573	0.728999	0.920375	1.08076	1.09029	0.920891	0.758667	0.847405	0.93416	1.06733	1.08588	1.50996	0.828642	0.654095	0.952498	0.980654	1.25176	0.923758	0.93573	0.655658	0.914981	0.733163	0.713431	0.963992
neb	0.643142	0.750211	0.822425	0.748487	0.806805	0.890244	0.570267	0.951047	0.710609	1.76279	1.33923	1.00745	0.76405	0.645054	0.406013	0.687371	0.779101	0.434313	0.0771779	0.305388	0.112078	0.577121	1.37798	2.35301	0.411088	0.512961	0.480506	0.419074	1.10463	0.383078	0.178034	0.413944	0.575748	0.736276	0.816619	0.912955
CG34011	-1	-0.637667	-0.82342	-0.729259	-0.433502	-0.437955	-0.85793	-1	-0.791419	-0.437896	-0.700353	-0.669605	-0.880255	-0.666179	-0.649409	-0.132579	-0.385431	-0.571277	-1	-0.768552	-0.964841	-0.889392	-0.737908	-0.438979	-0.812565	-0.811193	-0.701174	-0.528375	-0.463277	-0.630071	-0.526108	-0.625416	-0.674156	-0.516943	-0.756935	-0.955192
CG14598	-1	-0.968069	-1	-0.942788	-0.895131	-0.966717	-0.961507	-1	-0.942523	-0.941344	-0.948711	-0.861359	-0.936186	-1	-0.852283	-1	-0.954523	-0.897036	-0.888463	-0.951623	-0.972368	-0.91259	-0.944749	-0.831108	-0.74208	-0.923029	-0.845868	-0.922608	-0.933597	-0.658238	-0.520295	-0.958689	-0.765424	-0.812797	-0.572153	-0.83182
CG33795	-0.651331	-1	-1	-1	-1	-1	-0.831121	-1	-1	-0.748349	-0.884829	-0.918789	-0.727735	-1	-0.779608	-0.655395	-1	-0.578036	-1	-0.790096	-0.764123	-1	-0.876139	-0.638021	-0.929686	-1	-0.857829	-0.911487	-0.924014	-0.878737	-0.831978	-1	-0.860715	-0.691265	-0.907709	-0.920321
Dscam4	1.53783	1.42485	1.35491	1.20382	0.305073	1.10268	1.43929	1.28136	1.24254	0.126601	1.43015	0.956322	1.52314	1.32489	1.70466	1.32325	1.36461	1.31282	1.82194	1.56077	1.60667	1.61563	1.42193	1.53539	1.77009	1.74831	1.77724	1.52673	0.470659	0.968709	1.64805	1.53326	1.66603	2.00332	1.72818	1.76325
CG34205	-0.461978	-0.709544	-0.687142	-0.54126	-0.236418	-0.384962	-0.746036	-0.4593	-0.633395	-0.441642	-0.0924336	0.966397	-0.669394	-0.698496	-0.731381	-0.629584	-0.874108	-0.902103	-0.702677	-0.429073	-0.393009	-0.301815	-0.388353	-0.442719	0.576164	-0.89162	-0.825702	-0.262852	-0.288902	-0.228765	-0.138576	-0.379301	-0.538428	-0.572187	-0.384173	-0.642017
msb1l	-0.851326	-0.70786	-0.753761	-0.71158	-0.814149	-0.62382	-0.897056	-0.936774	-0.847916	1.96533	-0.739394	-0.87307	-0.681064	-0.799801	-0.781112	-0.96187	-0.598169	-0.846302	-0.948081	-0.912966	-1	-0.737777	1.29733	2.47943	-0.943885	-1	-0.681854	-0.797439	0.963065	-0.902883	-0.886647	-0.925534	-0.784655	-0.749653	-0.756804	-0.0387925
Ugt36Ba	0.209752	0.715018	0.238822	0.425958	0.815774	1.31419	0.400618	0.15005	0.176748	0.860489	0.594805	0.727578	0.217132	0.500113	-0.492981	-0.617391	-0.34565	-0.455101	-0.585955	-0.539439	-0.33417	-0.41975	-0.404236	-0.164317	-0.243293	-0.251618	0.0834637	-0.264703	-0.263989	-0.270541	-0.350619	-0.621113	-0.159204	-0.806856	-0.362877	-0.711256
CG40341	-0.607748	-0.564487	-0.381117	-0.516523	-0.800375	-0.648814	-0.600193	-1	-1	-0.781722	-0.638314	-0.517599	-0.763623	-0.785041	-1	-0.842141	-0.537225	-1	-0.43966	-1	-0.795549	-0.547068	-0.793756	-1	-0.575097	-0.852222	-0.659371	-0.851432	-0.754601	-1	-0.809496	-1	-0.665847	-0.815586	-0.578042	-0.743371
sing	-0.185736	-0.052375	0.00222271	0.139989	-0.133406	0.0409994	-0.290827	-0.0150605	-0.263813	-0.21339	-0.479222	-0.175392	-0.46944	-0.536523	-0.386642	-0.299115	-0.280186	-0.496758	-0.589486	-0.412415	-0.40849	-0.436873	-0.324763	-0.473151	-0.486471	-0.655969	-0.434208	-0.492824	-0.353088	-0.455312	-0.53344	-0.236258	-0.492311	-0.423001	-0.65854	-0.537369
CG13407	-0.848683	-0.941234	-0.788368	-0.728982	-0.950347	-1	-0.964213	-0.904471	-0.946539	-0.655406	-0.6564	-0.780962	-1	-0.89456	-1	-1	-0.957712	-1	-0.947126	-0.911386	-1	-0.8046	-0.974077	-0.945565	-0.942854	-0.928373	-0.856309	-1	-0.908298	-1	-0.95273	-1	-0.886302	-1	-0.961955	-0.967238
Ada	-0.090838	-0.32723	-0.190474	-0.259107	0.701243	0.14621	-0.32354	0.550626	-0.0408743	0.836078	0.239452	0.276548	1.20223	0.94274	1.07725	1.19349	1.05405	1.26867	0.892116	1.00636	0.669869	1.05091	1.46277	1.56626	0.437341	0.670049	0.825502	0.995304	0.940959	1.14451	0.5673	0.468473	0.928839	0.425399	0.799985	0.993306
CG11693	-0.697426	-0.613693	-0.469407	-0.646675	-0.329978	-0.757593	-0.877885	-0.867355	-0.630295	-0.749323	-0.69381	-0.589123	-0.728781	-0.753094	-0.83986	-0.945664	-0.912176	-0.976943	-0.962609	-0.906661	-0.861093	-0.833385	-0.910822	-0.887448	-0.900974	-0.974402	-0.9789	-0.852027	-0.872605	-0.96445	-1	-0.972877	-0.861275	-0.787854	-0.920864	-0.804151
CG5022	1.3181	1.28036	1.01923	1.12252	0.745444	1.04798	1.00209	1.10449	1.239	0.741264	0.883273	0.982954	1.43535	1.46279	1.50008	1.32654	1.66658	1.57044	1.5601	1.59633	1.51716	1.82185	1.32952	1.6617	1.44564	1.30023	1.40679	1.46058	1.26962	1.5221	1.57436	1.43844	1.64333	1.56587	1.61999	1.58089
CG6900	1.13712	0.874502	1.05903	1.63156	1.95199	1.63557	1.59324	1.38078	1.43004	2.1506	0.987239	1.16167	1.55675	1.91368	1.43728	1.30383	1.64315	1.35955	1.10178	0.770898	1.15589	1.52809	1.51719	1.30187	1.26503	1.34519	1.46844	1.75401	1.9217	1.83074	1.28464	1.44227	1.42107	1.9937	2.20926	1.98295
Cyp318a1	-0.0440868	-0.156028	-0.0439906	0.178888	0.0120353	0.0949543	-0.195051	0.227348	-0.171886	0.607494	0.0505419	0.238935	-0.0571919	0.14289	-0.111634	0.35904	0.379087	0.426016	0.182057	0.188177	-0.140712	-0.201248	0.0995132	0.0630273	-0.295526	-0.0326047	0.0482779	0.227328	0.182946	-0.0898857	0.0103136	-0.134723	0.0526594	0.0343296	0.414341	-0.154354
feo	-0.0334651	0.100869	0.115041	0.261128	0.313197	0.317484	-0.00293486	0.213864	0.0282691	1.465	0.321677	0.111684	0.18424	0.103236	0.283312	0.471493	0.58429	0.315282	0.286362	0.332082	0.0893132	0.313696	1.17149	1.92739	0.323122	0.221312	0.246555	0.509198	1.1047	0.335522	0.162358	0.27891	0.380273	0.262934	0.322563	0.695544
CG2709	-0.814917	-0.745427	-0.628875	-0.768058	-0.593925	-0.355236	-0.934243	-0.940134	-0.566531	0.238597	-0.830295	-0.569269	-0.524931	-0.491725	-0.419046	-0.509155	-0.587082	-0.36507	-0.498314	-0.628101	-0.697296	-0.596006	-0.378352	-0.107218	-0.580353	-0.869714	-0.944956	-0.585705	-0.208305	-0.821492	-0.361601	-0.929476	-0.795547	-0.622941	-0.418745	-0.363639
CG14339	-0.978425	-0.916646	-0.963204	-0.903584	-0.939346	-0.901196	-0.913762	-0.883706	-0.892772	-0.0400391	-0.88571	-0.93254	-0.88117	-0.955966	-0.850536	-0.952522	-0.914857	-0.883287	-0.914528	-0.909505	-0.927696	-0.869255	0.147584	0.839029	-0.964694	-0.970291	-0.95142	-0.884044	-0.397239	-0.899035	-0.93284	-0.907557	-0.917767	-1	-1	-0.946814
CG3919	0.28391	0.140115	-0.120212	0.134337	0.319696	0.370079	-0.0692917	0.0131673	0.102358	2.06907	0.340298	0.31618	0.562872	0.539941	0.568082	0.293206	0.532214	0.359436	0.35589	0.391787	0.39904	0.282296	1.13469	1.85665	0.286102	0.17415	0.339918	0.569688	1.34229	0.271704	0.332307	0.372054	0.47054	0.337682	0.550054	0.872096
TwdlF	-0.889639	-0.762036	-0.85958	-0.758364	-1	-0.840529	-0.851605	-0.964929	-0.942432	-0.678798	-0.851071	-0.765126	-1	-0.886615	-0.899705	-0.877972	-0.954451	-0.864076	-0.784611	-0.951546	-0.918514	-1	-0.972065	-0.830851	-0.795235	-0.849728	-0.936258	-0.885237	-0.933492	-1	-0.924294	-0.918399	-0.848753	-0.646613	-0.769931	-0.800113
CG34269	-0.89595	-0.883171	-0.910351	-0.795274	-1	-0.76621	-0.794768	-0.699601	-0.701599	1.46869	-0.505121	-0.869013	-0.404148	-0.530546	-0.37538	-0.265122	-0.43168	-0.543968	0.0949453	0.232368	-0.551709	0.404858	0.910311	1.70908	-0.504422	-0.259057	-0.215552	-0.255801	1.05351	-0.101952	-0.226369	-0.590251	-0.338	-0.27512	-0.375061	0.42094
CG31812	0.900665	1.18587	1.08335	1.1822	1.1206	1.33959	0.96964	0.994215	1.12186	1.01671	1.27443	1.27502	0.549283	0.565997	0.514405	0.830268	0.654459	1.16572	0.720287	0.808888	0.451713	0.780113	0.970645	0.931438	0.856839	1.18639	0.971946	0.856992	1.01127	1.41323	1.0428	0.912548	1.00747	1.11375	1.01828	1.07986
CR43344	0.275345	-0.212564	0.161452	0.209332	0.379885	0.196774	-0.225307	0.0604118	-0.173876	0.0316687	-0.144274	-0.00919527	0.265371	0.439441	0.302967	0.328539	0.0528984	0.307881	0.146549	0.347621	0.179811	-0.00313206	-0.0366383	0.206791	0.171865	0.212873	0.102831	0.336714	0.22873	0.0921933	0.172205	-0.277624	0.151902	-0.0227619	0.077422	0.227484
Cnb	0.8829	0.999262	0.874049	1.24866	1.05776	1.20107	1.04142	1.12615	1.03647	1.3298	1.06461	0.965829	1.23025	1.2743	1.25113	1.24544	1.4931	1.26736	0.848167	1.06662	1.12523	1.25016	1.57611	1.64447	1.01242	1.08915	1.09862	1.24698	1.59642	1.22864	1.10101	1.02988	1.05951	0.965931	1.15742	1.10435
CG9737	-0.689266	-0.54296	-0.699247	-0.853106	-0.844052	-0.877876	-0.970766	-1	-0.872624	-0.382692	-1	-0.919657	-0.162102	0.399231	0.0622876	-0.282036	-0.273553	-0.358428	-0.795708	-0.963229	-0.979033	-0.933347	-0.711163	-0.809667	0.117064	0.293951	-0.0321088	-0.0763164	0.0983166	-0.0336021	-0.923724	-0.849502	-0.862175	-0.856099	-0.908692	-0.870917
CG13566	-0.475218	-0.501907	-0.413635	-0.466729	0.65683	-0.244687	-0.323861	-0.554145	-0.256719	-0.244612	-0.151871	-0.237072	0.115427	-0.539506	-0.450565	-0.1001	-0.278367	-0.289752	-0.397505	-0.353398	-0.349161	-0.511694	-0.188303	-0.182163	-0.643264	-0.618262	-0.456962	-0.142173	-0.395246	-0.491929	-0.552797	-0.598223	-0.732979	-0.910744	-0.660827	-0.815169
CG11626	0.150603	0.0918288	-0.0343488	-0.150816	-0.23838	-0.128863	-0.248512	-0.134137	-0.388744	-0.4888	0.0958235	-0.572864	-0.481393	-0.145073	-0.354099	-0.30213	-0.411952	-0.475911	-0.222729	-0.103139	-0.268313	-0.267569	-0.395832	-0.193056	-0.162002	-0.273	-0.163494	0.189103	-0.255161	-0.00623963	-0.194932	0.232372	-0.292225	-0.0216125	-0.179081	-0.212195
CG18636	-0.810209	-0.925688	-0.888497	-0.776941	-0.876943	-0.849124	-0.786291	-1	-1	-0.930981	-1	-0.837635	-0.785592	-1	-0.940034	-0.812541	-0.946445	-0.918329	-0.86917	-0.687766	-0.814738	-0.897323	-0.872752	-0.83364	-0.79321	-0.954056	-0.659371	-0.909037	-0.884382	-0.875418	-1	-1	-0.891387	-1	-0.951799	-0.878841
cutlet	0.138382	-0.147112	-0.0843157	-0.0113529	-0.342064	-0.0183188	-0.187387	-0.0783179	-0.220597	0.0463673	0.177574	0.192295	-0.347501	-0.141394	-0.267935	-0.143683	0.0479594	-0.0194153	-0.139073	-0.154336	-0.187848	-0.345172	0.154903	1.32808	-0.0739035	-0.103952	-0.00453767	0.194181	-0.171273	-0.0142226	-0.165497	-0.310955	-0.183498	-0.462668	-0.397713	-0.140114
CG15754	-0.930289	-0.359964	-0.882465	-1	-1	-0.958598	-1	-0.956449	-1	-0.927189	-0.875283	-0.955315	-1	-1	-1	-1	-1	-0.956289	-1	-1	-1	-0.89175	-1	-1	-1	-0.95151	-1	-1	-0.958224	-1	-1	-1	-0.960817	-1	-0.949131	-1
CG3238	0.646676	0.691003	0.636572	1.09036	0.681884	0.878693	0.51	0.648392	0.757466	0.752792	1.05746	1.31151	0.578735	0.532539	0.63476	0.567823	0.366821	0.463416	0.210724	0.484369	0.396827	0.662205	0.643885	0.599851	0.552147	0.396128	0.436357	0.612649	0.40906	0.652528	0.294565	0.150295	0.314327	0.590871	0.692912	0.665826
CG32506	0.997763	0.995308	0.929321	0.648046	-0.548015	0.634741	0.785109	0.775513	0.75245	-0.52074	0.763859	0.672816	0.997928	0.756727	1.14474	0.66423	1.0475	0.819766	1.12449	0.90783	0.99606	0.941877	0.846	0.88002	1.06295	1.09804	1.18243	0.92809	-0.254003	0.532882	1.04149	0.904237	0.934867	1.30391	1.14235	0.927791
CG4374	-0.427069	-0.443735	-0.261256	-0.261742	-0.729963	-0.430289	-0.456311	-0.575551	-0.373598	-0.773583	-0.65885	-0.551233	-0.438936	-0.413659	-0.196221	-0.0815094	-0.350813	-0.29263	-0.508441	-0.243895	-0.475745	-0.395835	-0.537041	-0.287568	-0.179511	-0.219161	-0.404514	-0.228432	-0.784952	-0.355722	-0.234477	-0.298217	-0.386255	-0.386875	-0.442963	-0.551574
ms(2)34Fe	-0.956591	-0.935206	-0.926356	-0.963043	-0.945236	-0.949078	-0.970281	-0.955234	-0.941043	0.55465	-0.960362	-1	-0.895096	-0.970096	-0.973637	-0.957152	-0.96487	-0.928766	-0.899454	-0.878995	-0.950745	-0.943327	1.41742	2.23698	-0.914051	-0.911491	-0.934723	-0.940066	-0.0783365	-0.931003	-0.928782	-0.968098	-0.905156	-0.865438	-0.968402	-0.756344
snoRNA:Psi28S-2949	-0.290745	0.172017	-0.652717	-0.783623	-0.619729	-1	-1	-0.741133	-0.593842	-0.586451	-0.340949	-0.14645	-0.76011	-0.274869	-0.344637	-0.695501	-1	-0.740246	-0.597808	-1	-0.611086	-1	-0.445677	-1	-0.768564	-0.714061	0.178121	-0.473057	-1	-0.312062	-1	-0.236867	-1	0.254318	-1	-0.327825
Ir21a	-0.163146	-0.650128	-0.598454	-0.25382	-0.451758	-0.357173	-0.493219	-0.685783	-0.614045	-0.369592	-0.436405	-0.183435	-0.403591	-0.452028	-0.127695	-0.0118293	-0.0578577	-0.338667	-0.556224	-0.669619	-0.522632	-0.358683	-0.435617	-0.325953	-0.29886	-0.225324	-0.355022	0.00986457	-0.383456	-0.15804	0.0987412	0.00998593	-0.30921	-0.440465	-0.140709	-0.244571
Ir76b	0.0616943	-0.387368	-0.403752	0.656108	0.26154	0.0378992	-0.212248	-0.546273	0.0188586	0.0496935	0.191107	0.316314	-0.0473144	0.723563	0.401194	1.26403	0.833334	0.233487	-0.79693	-0.897968	0.106508	-0.161157	-0.473463	-0.0318045	0.020298	0.707994	-0.0583136	0.789714	0.368296	0.748177	0.801296	0.831682	0.837159	-0.151819	0.640397	-0.600719
CG15861	1.41775	1.02671	1.17803	1.2605	1.26864	1.32031	0.853246	0.916326	1.0438	1.22398	1.29829	1.19597	0.850609	0.536499	0.759192	0.888239	0.694737	0.898237	0.911038	0.757987	0.87945	0.549527	0.690324	0.905906	0.901122	0.892095	0.73845	1.27795	1.60889	1.34778	0.917061	1.01578	0.936073	0.99438	0.980992	0.966403
Pxd	-0.776179	-0.869542	-0.889067	-0.946172	-0.901238	-0.821648	-1	-0.919045	-0.945922	-0.865797	-0.859837	-0.808203	-0.925322	-0.842866	-0.817191	-0.712136	-0.671388	-0.783123	-0.894944	-0.910376	-0.886596	-1	-0.922714	-0.791338	-0.914141	-0.945326	-0.969746	-0.927155	-0.892361	-0.974344	-0.905901	-0.961144	-0.941364	-0.931223	-0.924028	-0.871769
CG18607	-0.907601	-0.947167	-0.920433	-0.817507	-0.474118	-0.840772	-0.760886	-0.731293	-0.905439	-0.647658	-0.760051	-0.724825	-0.750931	-0.815971	-0.916076	-0.741994	-0.853674	-0.780419	-0.906464	-0.844679	-0.825057	-0.926795	-0.491133	-0.185271	-0.716073	-0.873906	-0.254539	-0.500914	0.173813	-0.672802	-0.526492	-0.478213	-0.366102	0.107433	0.0723119	-0.0380741
CG14247	-0.456479	-0.843379	-0.352421	-0.447741	0.110356	-0.297071	-0.686792	-0.505209	-0.551677	-0.543634	-0.319521	-0.338754	-0.841835	-0.926475	-1	-1	-1	-0.788437	-0.927576	-0.879163	-0.800085	-0.836477	-0.830044	-0.691245	-0.614312	-0.389777	-0.480658	-0.602006	-0.491706	-0.742187	-0.728918	-0.543601	-0.705838	-0.38415	-0.203361	-0.568708
CG43155	0.227786	-0.139982	-0.0192394	-0.146565	-0.164442	0.0654329	-0.192383	-0.0618769	0.159328	-0.411444	-0.216099	-0.1103	0.134948	-0.140802	0.22652	0.216913	0.3376	0.149796	0.194988	0.326577	0.174817	0.346886	0.255782	0.2413	0.0132595	0.235303	0.158279	0.180372	0.000494279	0.562493	0.43012	0.313921	0.295408	-0.00636448	0.246132	-0.0255348
CG15930	-0.635463	-0.858354	-0.656492	-0.383844	-0.492049	-0.483664	-0.785553	-0.477131	-0.540872	1.12466	-0.533959	-0.568404	-0.674443	-0.511309	-0.693549	-0.488479	-0.557978	-0.762894	-0.754797	-0.707734	-0.587385	-0.545624	0.0384763	0.71808	-0.63659	-0.717233	0.00704798	-0.0962096	0.555149	-0.705666	-0.477071	-0.55273	-0.0404611	-0.575449	-0.749707	0.385219
CG5359	0.558719	0.617358	0.595046	0.984152	1.24262	0.898727	0.73132	0.440577	0.562974	1.30799	0.607659	0.882445	0.733015	0.548134	0.648455	0.595497	1.12166	0.733479	0.552256	0.485805	0.622364	0.93627	0.945994	1.24124	0.599546	0.809929	0.983941	1.14723	1.3212	1.3314	0.88954	0.722874	0.823334	0.533291	0.783042	1.12358
Mur89F	-1	-0.956548	-0.990452	-0.966225	-1	-0.954716	-1	-1	-1	-0.954003	-0.949925	-0.978853	-0.956102	-0.837148	-0.911681	-0.959225	-0.99101	-0.952194	-0.988727	-0.990429	-0.951806	-0.939717	-0.838939	-0.421887	-1	-0.969463	-0.937858	-0.984565	-0.993383	-1	-0.989937	-1	-0.933208	-0.971031	-0.960053	-0.958814
CG11333	-1	-0.88368	-0.826693	-0.749379	-0.901419	-0.938182	-0.673889	-0.813169	-0.893992	0.397628	-0.816314	-0.693705	-0.882517	-1	-1	-0.922615	-1	-1	-0.895136	-1	-1	-0.91786	0.933427	1.25295	-0.833403	-0.858824	-0.940225	-0.858068	-0.120733	-0.806833	-1	-0.850756	-0.941473	-0.909174	-1	-0.754439
CG13847	-1	-0.956204	-0.912573	-0.896622	-0.950908	-0.895665	-0.947248	-0.98382	-0.947141	-0.894055	-0.819959	-0.918818	-0.926994	-1	-0.821138	-0.961605	-0.937732	-0.90519	-0.897272	-0.912372	-0.925129	-0.979462	-0.912225	-0.807754	-0.957417	-1	-0.92719	-0.928787	-0.909319	-1	-0.988173	-0.943405	-0.956801	-1	-0.925728	-0.904934
CG5278	-0.886461	-0.673509	-0.855578	-0.434484	-0.791407	-0.867354	-0.524365	-0.733661	-0.940743	-0.175828	-0.62296	-0.696509	-0.781785	-0.724361	-0.800503	-1	-0.739108	-0.732751	-0.679505	-0.682404	-0.713779	-0.825118	-0.163797	-0.40308	-0.876	-0.959786	-0.934391	-0.459169	-0.577613	-0.89059	-0.77785	-0.725267	-0.815267	-0.762842	-0.763576	-0.762964
CG1850	-0.858352	-0.826244	-0.925408	-0.869537	-0.839596	-0.715004	-0.940401	-0.910685	-0.748816	-0.939057	-0.946705	-0.908397	-0.983137	-0.827097	-0.94707	-0.914456	-0.92968	-0.981621	-0.970165	-0.949729	-0.957128	-0.953894	-0.88738	-0.954158	-0.816417	-0.979593	-0.983184	-0.939291	-0.881357	-0.837633	-0.921483	-0.874855	-0.967266	-0.899646	-0.957475	-0.858761
CG13376	-1	-0.966908	-1	-0.911978	-0.840041	-0.866718	-0.960111	-0.860027	-1	-1	-1	-0.856504	-0.933891	-0.940206	-0.947222	-1	-0.698511	-1	-1	-0.809168	-0.915734	-1	-0.860936	-0.881185	-0.936357	-1	-0.902201	-0.919838	-0.965196	-1	-0.847444	-1	-1	-0.852382	-0.957598	-0.893098
Dscam3	1.73045	1.64587	1.60874	1.33671	0.132059	1.37532	1.52766	1.45532	1.48404	0.186156	1.60711	1.27903	1.67564	1.76242	1.87681	1.5731	1.78787	1.65257	1.99404	2.00795	1.84469	1.94344	1.7297	1.83334	1.7839	1.85417	1.90648	1.75019	0.563453	1.18734	1.81642	1.74874	1.81384	2.049	1.81196	1.90384
CG33985	-1	-0.866692	-0.627811	-0.731989	-0.71617	-0.817817	-0.525038	-0.52528	-1	-0.435732	-0.298517	-0.552587	-0.523614	-0.563729	-0.667619	-0.448232	-0.595947	-0.0824677	-0.340556	-0.423055	-0.260858	-0.335159	-0.520738	-0.496312	-0.677047	-1	-0.909108	-1	-0.692333	-0.922676	-0.92727	-0.829238	-0.954806	-1	-1	-0.853393
CG34116	1.39661	1.3346	1.40401	1.81755	1.99791	1.53578	1.38192	1.72809	1.3187	2.10895	1.57559	1.53418	1.69154	1.85421	1.77027	1.63608	1.45676	1.75747	1.61676	1.76347	1.6138	1.72134	1.88473	1.81348	1.71298	1.67315	1.67235	1.64079	2.05327	2.08666	1.67597	1.67468	1.76042	1.77139	1.82679	1.81717
CG9541	-0.276188	-0.4347	-0.543341	0.269822	-0.335937	-0.128022	-0.397894	-0.421813	-0.414591	0.119866	-0.22626	-0.138829	0.722336	1.25097	0.895567	0.895057	0.882545	0.851616	0.302329	0.262826	0.996267	0.489969	0.653244	0.905732	0.0846614	1.14123	0.357934	0.7656	0.214804	1.04168	0.594408	0.635238	0.624553	0.358338	0.709182	0.334812
snRNA:U1:82Eb	-0.621425	-0.774463	-0.669755	-1	-1	-1	-1	-0.754197	-1	-1	-1	-0.748233	-1	-1	-1	-0.710645	-1	-0.753351	-1	-1	-0.803124	-0.694164	-1	-0.790228	-0.780346	-0.499863	-1	-1	-0.224077	-1	-1	-1	-0.777355	-0.664401	-1	-0.752719
CG32365	0.670713	0.584781	0.415831	0.714171	0.413393	0.501277	0.558078	0.529689	0.325247	0.725049	0.609078	0.890057	0.652439	1.18838	1.17145	0.938315	0.790798	1.106	0.591875	0.771982	0.844691	1.01638	0.900389	0.890068	0.831711	1.03215	0.779294	1.12025	0.573372	1.11394	1.01364	1.09092	0.971538	0.901644	1.02575	0.931946
CG6813	0.846464	0.754279	0.704572	0.988122	0.869099	1.09143	0.890269	0.523586	1.00773	1.23318	0.952245	0.916273	1.28618	1.4989	1.42802	1.70107	1.43622	1.68945	1.58002	1.31861	1.41984	1.58109	1.46157	1.46304	1.18133	1.14473	1.24269	1.3802	1.15541	1.24707	1.18728	1.15549	1.12727	1.19243	1.02846	1.4164
CG33140	-1	-0.914442	-0.973447	-0.968481	-1	-1	-0.917219	-0.94308	-0.937347	0.265868	-0.97177	-0.922654	-0.982296	-1	-0.971964	-0.867448	-0.811111	-0.980705	-1	-0.871577	-0.969851	-0.951618	1.00202	1.74335	-0.966134	-0.978576	-0.982345	-0.978456	-0.25021	-0.912468	-0.931054	-0.911255	-0.899287	-1	-0.955373	-0.869711
CG14515	-0.214519	0.266446	-0.366391	0.627641	0.877107	-0.30872	-0.319531	-0.324344	-0.133284	0.329605	0.167713	0.531292	0.454722	0.49537	0.735572	1.52638	1.53643	1.2008	0.81734	0.683016	0.873553	0.684695	0.593145	0.571022	0.794058	0.151454	1.05402	1.29515	1.23941	1.00628	0.566447	1.08309	0.880893	0.698595	0.658423	0.487328
snoRNA:Or-aca1	-1	-0.30696	-0.607701	0.0804566	0.621804	-1	-0.196684	0.488125	-0.195412	0.538878	-0.00199078	1.00399	0.804232	0.0872575	0.214372	-0.377438	-0.332521	0.60336	-0.202329	-0.606888	-0.22559	-0.104249	0.173167	0.536675	0.484413	-0.411814	0.409815	0.3326	0.661401	0.26483	-0.420753	-0.65879	0.148157	0.184374	0.214889	0.606056
CG15115	-0.408646	-0.853154	-0.782301	-0.632056	0.424673	-0.709025	-0.619192	-0.944518	-0.743485	-0.104023	-0.510162	-0.554073	-0.805472	-0.593262	-0.919543	-0.642434	-0.794207	-0.890697	-0.825882	-0.652782	-0.913594	-0.92983	-0.75279	-0.820956	-0.607793	-0.879044	-0.85209	-0.766241	-0.539675	-0.685289	-0.636952	-0.87208	-0.723411	-0.778634	-0.935239	-0.838578
Ctf4	0.313782	0.257411	0.362864	0.17946	-0.0506416	0.190848	0.0243246	0.0609003	0.188394	0.130969	0.244574	0.121164	0.282243	0.232305	0.0914672	0.200848	0.555294	0.187089	-0.00539692	0.221055	0.128453	0.0408284	0.248682	0.618009	0.32126	0.214523	0.347656	0.385951	0.406586	0.536718	0.210471	0.162273	0.140379	-0.151795	0.132103	0.145051
CG13333	-0.773877	-0.6359	-0.918406	-0.880331	-0.866811	-0.862773	-0.755122	-0.724882	-1	-0.639488	-0.754269	-0.692906	-0.548545	-0.644718	-0.793773	-0.705951	-0.850032	-0.828117	-0.814165	-0.767373	-0.75888	-0.598925	-0.602563	-0.562744	-0.687562	-0.565459	-0.570122	-0.489899	-0.664487	-0.113215	-0.394669	-0.370976	-0.460996	-0.530025	-0.626796	-0.448874
CG13562	-0.233345	-0.348063	-0.584232	-0.078855	0.0259715	-0.132213	-0.220287	-0.0614833	0.109169	-0.0161482	-0.138269	-0.419706	0.377664	0.029899	0.0166604	0.12591	0.327208	0.265553	-0.129256	-0.0211334	0.243045	0.521241	0.0913308	0.590671	0.306523	0.430173	0.219327	0.505681	0.676554	0.999735	0.678264	0.569427	0.571338	0.259616	0.679467	0.544951
CG10051	-0.974577	-0.971358	-0.935502	-0.827699	-0.928699	-0.884117	-0.948502	-1	-0.948398	-0.799986	-1	-0.92073	-0.606001	-0.512248	-0.976958	-1	-1	-0.98415	-0.948965	-1	-0.975218	-1	-0.926225	0.0535532	-0.91803	-0.914067	-0.887879	-0.848019	-0.774963	-0.557203	-0.921082	-0.944749	-0.739688	-0.463946	-0.927481	-0.877499
mos	-0.300184	-0.437994	-0.640104	-0.502489	-0.531432	-0.418203	-0.514206	-0.626445	-0.425712	-0.116568	-0.412787	-0.19535	-0.45368	-0.797013	-0.207862	-0.653109	-0.592944	-0.625214	-0.666198	-0.135699	-0.502689	-0.539834	-0.12744	-0.243354	-0.039503	-0.183877	-0.208927	-0.159682	-0.274203	-0.258949	-0.324358	-0.539169	-0.106429	0.0633807	-0.310879	-0.133071
CG7714	-1	-0.918749	-0.307139	-0.69476	-0.474775	-0.759691	-0.76734	-0.20808	-0.663099	-0.191055	-0.193063	-0.363199	-0.95838	-1	-0.753812	-0.844172	-0.586832	-1	-0.727286	-1	-0.929527	-0.942829	-1	-0.961856	-0.920972	-0.94972	-0.958493	-0.949442	-0.83401	-0.800525	-0.594106	-1	-0.881374	-0.936725	-1	-0.867724
CG14752	0.186372	-0.261814	0.169882	0.340687	1.21282	0.412135	0.31627	0.458817	0.263012	1.08395	0.113333	0.961726	-0.552707	0.0221709	0.36063	0.689691	0.0211363	0.305825	0.803945	0.564448	1.1725	0.44422	1.11001	0.89114	-0.415563	0.214938	0.261904	-0.0371913	0.165983	0.461391	0.237986	-0.0485121	0.471853	-0.221065	-0.212002	-0.156048
CG13198	-0.291261	-0.614139	-0.892059	-0.647087	-0.31957	-0.33439	-1	-0.581418	-1	-0.869388	-0.779312	-0.70094	-0.729106	-0.871433	-0.682456	-0.259477	-0.803064	-0.846033	-0.873322	-0.446897	-0.765326	-0.720284	-0.818926	-0.587619	-0.930065	-0.191935	-0.555892	-0.676117	-0.85261	-0.568313	-0.683078	-0.20948	-0.618831	-0.788113	-0.8219	-0.774222
CG9121	1.99961	1.87608	1.77369	1.65805	1.27477	1.76761	1.81358	1.74392	1.66595	1.68679	1.81214	1.7533	1.95397	1.64024	1.74271	1.64039	1.71953	1.7757	1.75305	1.98139	1.89825	1.87992	2.00067	2.22407	1.63924	1.80619	1.76437	1.38107	1.4645	1.71442	1.63988	1.60436	1.71066	1.84264	1.6311	1.86013
CG14212	-0.462493	-0.406225	-0.134145	-0.77032	-0.853064	-0.551041	-0.656124	-0.725457	-0.699951	0.200466	-0.556136	-0.520306	-0.867137	-0.918605	-0.558799	-0.539593	-0.136299	-0.766934	-0.63739	-0.132605	-0.419874	-0.877233	0.429333	0.832202	-0.419978	-0.446574	-0.59873	-0.606623	0.162949	-0.425934	-0.672351	-0.680558	-0.443437	-0.801166	-0.423801	-0.492114
CG16879	-0.630483	-0.432345	-0.597549	-0.896479	-0.889997	-0.741546	-0.826402	-0.945187	-0.575953	-0.908595	-0.725986	-0.722618	-0.822791	-0.910046	-0.75046	-0.851996	-0.952249	-0.891991	-0.940322	-0.924464	-0.956681	-0.886237	-0.913845	-0.908801	-0.526413	-0.77009	-0.793319	-0.649414	-0.863815	-0.8104	-0.717052	-0.873585	-0.740415	-0.354577	-0.759516	-0.525142
CG14421	-0.841939	-0.48962	-0.569813	-0.471325	-0.367777	-0.250753	-0.693526	-0.677062	-0.625419	-0.317125	-0.602996	-0.627832	-0.662112	-0.83768	-0.926279	-0.825525	-0.934128	-0.718045	-0.917803	-1	-0.959864	-0.87419	-0.881735	-0.83549	-1	-1	-0.701015	-0.688284	-0.501967	-0.921791	-0.962749	-0.625222	-0.90997	-0.861103	-1	-0.851754
CG5928	-1	-0.734676	-0.613823	-0.834373	-0.946486	-0.810502	-0.851491	-0.626466	-0.833634	-0.631324	-0.442601	-0.590077	-0.52975	-0.0130787	-0.376713	-0.179867	-0.312998	-0.100694	-0.431052	-0.402823	-0.374472	-0.41417	-0.214249	0.0120079	-0.741507	-0.619121	-0.417627	-0.586995	-0.722044	-0.893574	-0.718235	-0.664204	-0.685756	-0.726979	-0.667096	-0.652144
CR32207	0.394021	0.343629	0.492837	0.886303	1.42469	0.907916	0.915847	0.71938	1.17045	3.49135	0.786513	0.688969	0.637159	0.200208	0.898255	0.593833	0.365454	0.571795	-0.305524	0.0595164	-0.110252	0.593584	1.13864	2.24347	1.05153	0.8867	0.994066	1.25912	2.29523	1.00566	1.26504	1.04556	1.25707	1.00711	0.683911	1.04248
tRNA:CR30297	-1	0.523592	-0.34917	-1	-1	-1	0.23837	-1	-1	0.257394	-0.316141	0.427722	-1	-1	-1	-0.422551	-1	-0.501024	-1	0.0995241	0.557899	-0.392776	-0.273882	0.0289579	0.496887	-1	0.328538	-0.056304	-0.520103	-1	-0.0729816	-0.0192228	-1	-0.339683	0.76992	-1
CG33299	-0.90808	-0.847751	-1	-0.818424	-0.912545	-0.698845	-0.876133	-0.782265	-0.655727	-0.573531	-0.621519	-0.829549	-1	-0.905545	-1	-0.803288	-1	-0.942198	-1	-0.845466	-0.910346	-0.728465	-0.954055	-0.814443	-1	-1	-0.947052	-1	-0.89153	-1	-1	-0.932147	-0.898117	-1	-1	-1
Poxn	-0.862365	-0.845676	-0.904211	-0.914273	-0.894226	-0.901526	-0.832938	-0.863613	-0.806509	-0.912131	-0.94826	-0.843614	-0.951453	-0.885817	-0.923592	-0.93725	-0.824644	-0.879542	-0.971043	-0.880956	-0.917934	-0.657631	-0.877492	-0.955499	-0.849797	-0.903584	-0.844561	-0.90306	-0.748921	-0.817501	-0.936185	-0.840067	-0.749918	-0.789276	-0.898934	-0.783178
fs(1)Ya	-0.588927	-0.431113	-0.538658	-0.317518	-0.279968	-0.398782	-0.406252	-0.398758	-0.68084	-0.0253356	-0.453059	-0.359727	-0.309676	-0.272707	-0.254366	-0.364847	-0.524726	-0.203015	-0.446729	-0.442083	-0.518433	-0.317099	-0.241379	-0.235079	-0.386455	-0.385413	-0.78295	-0.194501	-0.241877	0.0108624	-0.487028	-0.479583	-0.268789	-0.492041	-0.154705	-0.531723
snoRNA:Psi28S-1153	1.21954	1.00003	1.31918	1.07719	1.74099	1.40646	0.707317	0.40418	0.0154932	1.55268	0.898765	1.13107	1.07752	1.02776	1.54044	0.684791	1.8952	1.62413	0.230747	0.280095	0.557899	1.37479	1.60168	1.31869	1.21557	1.29358	1.13778	0.914698	2.08716	1.27479	1.53783	0.779815	0.915969	1.70356	1.59973	1.67507
clos	-0.767227	-0.739998	-0.807687	-0.807447	-0.532669	-0.717583	-0.84511	-0.762625	-0.762042	-0.69199	-0.671766	-0.716727	-0.605738	-0.686049	-0.817592	-0.682423	-0.7143	-0.640621	-0.732268	-0.797797	-0.793888	-0.787793	-0.643971	-0.404095	-0.729386	-0.694627	-0.708563	-0.700186	-0.514521	-0.684673	-0.674448	-0.777673	-0.749185	-0.684408	-0.623397	-0.550584
CG42750	1.50816	1.20462	1.27673	1.01989	-0.307129	0.988179	1.25559	0.923047	1.11215	-0.223886	1.34797	0.92564	1.29726	1.35426	1.47182	1.28301	1.37563	1.32842	1.67751	1.59453	1.48983	1.58466	1.3812	1.51868	1.60665	1.57594	1.71759	1.37905	0.0079185	0.850875	1.3857	1.35141	1.55507	1.77881	1.49419	1.59327
CG43124	-0.910287	-0.760107	-0.922757	-0.488937	-0.208097	-0.946569	-0.476784	-0.517485	-0.45407	-0.444588	-0.629789	-0.732357	-0.803102	-0.662067	-0.507678	-0.69264	-0.50003	-1	-0.666697	-0.849101	-0.677948	-0.675245	-0.8695	-0.7768	-0.388871	-0.343849	-0.370664	-0.513621	-0.457096	0.0780862	-0.479144	-0.35517	-0.193231	-0.411197	-0.811561	-0.358745
Nek2	-0.944447	-0.892332	-0.883456	-0.836434	-0.799409	-0.798288	-0.888639	-0.850269	-0.971285	-0.780672	-0.876332	-0.830426	-0.804148	-0.915168	-0.877158	-0.750405	-0.911372	-0.802937	-0.714704	-0.754462	-0.830918	-0.792767	-0.892662	-0.819731	-0.744626	-0.833961	-0.722705	-0.66778	-0.767667	-0.423648	-0.8541	-0.861741	-0.767758	-0.814689	-0.720895	-0.914366
CG34309	-0.122732	0.432443	-0.557754	1.15543	1.29145	0.336678	-0.19983	-0.128994	0.0801497	1.05319	-0.00567074	-0.111807	0.390312	0.532877	0.455822	1.01267	0.564858	0.385199	-0.578831	-0.279966	0.350308	-0.00874814	-0.306263	0.234616	0.248563	0.959458	0.464427	1.20248	0.956293	1.35247	1.16306	1.10702	1.18181	-0.475651	0.670874	-0.496976
CG13049	-0.906996	-1	-1	-1	-0.749321	-0.891216	-0.874688	-1	-0.815533	-0.569041	-0.834634	-0.774416	-1	-1	-0.915524	-0.68219	-0.852733	-0.941508	-1	-1	-0.909288	-1	-0.86478	-0.268898	-0.898361	-0.701481	-0.894756	-0.755186	-0.603684	-0.910401	-0.836061	-0.685348	-0.947539	-1	-0.931987	-1
dmrt11E	-1	-0.880197	-1	-0.944627	-0.948331	-0.905467	-1	-1	-1	-0.888607	-0.902377	-0.965234	-1	-1	-1	-1	-1	-0.965994	-1	-1	-0.947015	-1	-1	-0.971401	-0.94054	-1	-1	-1	-1	-1	-1	-1	-1	-1	-1	-0.9659
inaC	-1	-0.982742	-1	-0.923603	-0.914828	-0.861978	-0.958644	-0.855061	-0.90838	-0.906523	-0.866039	-0.90536	-0.931483	-0.793815	-0.89258	-0.95513	-0.835803	-0.92544	-0.909373	-0.973785	-0.970304	-0.906204	-0.940665	-0.921865	-0.840425	-0.917385	-0.94845	-0.916933	-0.928708	-0.913758	-0.905778	-1	-0.966157	-0.823188	-0.934553	-0.943568
CG32822	-0.660707	-0.761918	-0.758974	-0.624494	-0.511504	-0.477363	-0.851529	-0.780742	-0.716392	-0.19387	-0.687581	-0.734359	0.103118	-0.346802	-0.138953	0.350696	-0.124674	0.192224	-0.064223	-0.117969	-0.338808	0.074411	-0.0642426	0.218842	0.242427	0.166605	0.0282511	-0.158752	0.449335	0.202342	0.0469346	-0.00738471	0.332705	0.0458198	-0.0426031	0.389042
hec	0.262706	0.132152	-0.0149776	-0.163226	-0.749143	-0.0560706	0.0224656	0.0182549	-0.160231	-0.623012	0.101643	-0.124371	0.384665	0.403237	0.306986	0.12685	0.210188	0.198813	0.54049	0.362138	0.315637	0.413171	0.447795	0.324557	0.277653	0.274885	0.220807	0.267807	-0.439695	0.344245	0.0945925	0.19922	0.162787	0.0852775	0.124417	0.329223
CG8960	-0.808845	-0.925132	-1	-0.805384	-0.708033	-0.743705	-0.910018	-0.803169	-0.866786	0.0264252	-0.939168	-0.875638	-0.817882	-0.743852	-0.939583	-0.684217	-0.534189	-0.661883	-0.690672	-0.887418	-0.813404	-0.896563	-0.277171	-0.770503	-0.697885	-0.665596	-0.56826	-0.70189	-0.0552342	-0.874501	-0.746576	-0.76999	-0.788885	-0.729647	-0.951436	-0.765424
CR43644	-1	-1	-1	-1	-0.524031	-0.866718	-0.846662	-1	-0.775272	-0.770922	-0.895605	-0.725998	-1	-0.774393	-0.708912	-0.834162	-0.737911	-0.671548	-1	-0.563247	-0.888705	-0.824292	-1	-1	-0.936357	-0.63926	-0.871021	-0.919838	-0.742576	-0.890062	-0.896525	-1	-0.814397	-0.806352	-0.171771	-0.859154
CG14342	-0.534825	-0.0785363	-0.373678	0.256884	0.0595713	0.1084	-0.135299	-0.52225	-0.222285	-0.155476	-0.0989332	0.471439	-0.127306	0.465172	0.0240983	0.452429	0.399184	0.471542	-0.464405	-0.715528	-0.251695	-0.567754	-0.219766	-0.104718	-0.362072	0.0666772	-0.217021	0.320216	0.0644514	0.228001	0.248076	0.392119	-0.171478	-0.0849725	-0.0593354	-0.401939
CG2887	-1	-0.936529	-1	-0.808091	-0.946358	-0.933873	-0.961323	-0.864141	-0.942249	1.05968	-0.948466	-0.928678	-0.904861	-0.94201	-1	-1	-0.910014	-0.896553	-0.942883	-0.904368	-0.816007	-0.912177	0.547083	1.20112	-1	-0.885499	-0.874825	-0.848461	0.14206	-1	-0.899603	-1	-0.764372	-1	-1	-0.280987
CG30401	-0.717156	-0.965181	-1	-0.820528	-1	-0.827036	-0.660131	-0.888369	-0.877354	1.46711	-0.838421	-0.680695	-0.710582	-0.763404	-0.891032	-0.670586	-0.811189	-0.656116	-0.821629	-0.847274	-0.723702	-0.470761	-0.0457978	1.19927	-0.838166	-0.876034	-0.572815	-0.587654	0.271372	-0.726889	-0.695656	-0.568334	-0.71689	-0.750192	-0.506115	0.147069
CG33012	-0.835333	-0.59789	-0.642354	-0.74459	-0.930678	-0.638892	-0.490372	-0.682775	-0.47168	-0.426989	-0.537388	-0.62556	0.0378	-0.0694553	-0.751828	-0.344365	-0.090721	-0.370183	-0.548636	-0.249191	-0.52786	-0.748675	-0.472143	-0.232168	-0.857086	-0.677563	-0.270911	-0.569401	-0.299311	-0.819901	-0.714885	-0.704185	-0.434121	-0.741795	-0.501031	-0.596318
CG10445	0.019993	0.294704	-0.023223	-0.0571199	-0.530031	0.176364	-0.152778	0.0596733	0.0271003	-0.330633	-0.137199	-0.181513	-0.165129	0.019642	0.0348213	0.0802867	0.0610871	-0.137141	-0.170504	-0.0124642	-0.0987122	0.0343491	-0.017712	0.28824	0.0169195	-0.000286681	-0.24209	0.0812038	-0.305242	-0.145615	-0.158856	-0.164717	-0.240908	-0.0954764	-0.00973556	-0.0723979
CG14556	-0.833919	-0.756968	-0.811656	-0.85773	-0.841794	-0.53255	-0.556141	-0.591513	-0.678175	1.579	-0.800438	-0.474616	-0.72671	-0.776812	-0.801736	-0.875267	-0.663665	-0.82834	-0.779988	-0.295983	-0.518342	-0.258335	1.39529	2.02278	-0.847559	-0.960048	-0.934815	-0.774199	0.387949	-0.94462	-0.922588	-0.957679	-0.875051	-0.679825	-0.87773	-0.535209
CG34393	1.26851	1.36243	1.27233	1.16133	0.690783	1.2679	1.15488	1.17264	1.08548	0.703008	1.07607	1.13928	1.68579	1.67552	1.77192	1.44918	1.57872	1.76295	1.77839	1.75233	1.85284	1.93414	1.85108	1.77602	1.66867	1.57658	1.63349	1.31692	1.15208	1.47606	1.54281	1.51728	1.62318	1.77473	1.53695	1.56
Gas8	-0.850532	-0.74059	-0.846461	-0.763616	-0.632241	-0.715176	-0.85709	-0.766482	-0.682747	0.377365	-0.811769	-0.777848	-0.555586	-0.73446	-0.581968	-0.309306	-0.583449	-0.521379	-0.937576	-0.729339	-0.68422	-0.555543	0.609314	1.42565	-0.609216	-0.522923	-0.768961	-0.474331	0.115082	-0.537283	-0.615089	-0.671518	-0.729286	-0.868701	-0.638367	-0.478629
CG15549	-0.937529	-0.862728	-0.894493	-0.905542	-0.940593	-0.823523	-1	-1	-1	0.310733	-0.942923	-0.959992	-1	-1	-0.888768	-0.953502	-1	-1	-0.936752	-0.946157	-0.969221	-0.950612	0.790628	1.15029	-0.866415	-0.873472	-0.964171	-0.613451	0.125521	-1	-0.943434	-0.954008	-0.897232	-1	-0.707735	-0.885335
bin	-0.106291	-0.0838947	-0.234074	-0.327851	-0.448398	-0.310563	-0.135114	-0.0756389	-0.139301	-0.177132	-0.196659	-0.0674816	-0.0680212	0.00607974	-0.155658	-0.150925	0.0620826	0.0733365	0.0391605	0.098246	0.0873239	0.346676	0.199214	0.111932	-0.0688059	-0.171597	-0.198528	0.0649629	0.0217872	-0.100935	0.0240849	-0.244844	0.205662	-0.269077	-0.28916	-0.100412
Rx	-0.651522	-0.593711	-0.622289	-0.397517	-0.650682	-0.597993	-0.56529	-0.809768	-0.772258	-0.58501	-0.866576	-0.677184	-0.59945	-0.400522	-0.544632	-0.016371	-0.44866	-0.588455	-0.755772	-0.806579	-0.702178	-0.821896	-0.614728	-0.720518	-0.737377	-0.776353	-0.759837	-0.283771	-0.565643	-0.258554	-0.461345	-0.425786	-0.54433	-0.907464	-0.451914	-0.773191
Cp7Fb	-0.875285	-0.684537	-0.577145	-0.518937	-0.520198	-0.532917	-0.613064	-0.422862	-0.755175	-0.75047	-0.536619	-0.858209	-0.80584	-0.871885	-0.908586	-0.785382	-0.680692	-0.748119	-0.757697	-0.831179	-0.776956	-0.639099	-0.350634	-0.762483	-0.704111	-0.767882	-0.658814	-0.845744	-0.825461	-0.607379	-0.751883	-0.75504	-0.748051	-0.553713	-0.757214	-0.720475
CG2983	-0.662512	-0.672554	-0.225936	-0.397714	-0.380364	0.602654	-0.427181	-0.697735	-0.842075	0.225583	-0.0030935	-0.38993	-0.852995	-0.945189	-1	-0.847529	-0.95682	-0.902139	-0.843749	-0.705489	-0.89783	-0.957874	0.548934	-0.0131151	-0.941655	-0.962975	-0.96946	-1	-0.467054	-0.851149	-0.951734	-0.84913	-0.940814	-1	-0.886457	-0.642138
TrissinR	1.24816	1.12205	1.17841	1.18035	0.707468	1.09869	0.913666	0.994708	1.05961	0.953671	1.05398	1.13907	1.36907	1.626	1.48995	1.49347	1.33084	1.25069	1.43592	1.40796	1.555	1.4276	1.49185	1.54628	1.33759	1.59934	1.31551	1.38859	0.858368	1.399	1.38969	1.39609	1.55895	1.58345	1.53269	1.4343
CG43352	-0.803909	-0.780653	-0.678514	-0.544752	-0.364751	-0.485913	-0.624152	-0.760899	-0.799485	1.55369	-0.820146	-0.646637	-0.885022	-0.798695	-0.269493	-0.189079	-0.564419	-0.46163	-0.471609	-1	-0.721621	-0.843507	0.194724	0.809801	-0.889243	-1	0.164101	-0.734353	-0.0362186	-0.234077	-0.270744	-0.487744	-0.352207	-0.673287	-0.0366162	0.23926
CG3081	-0.550953	-0.890041	-0.633815	-0.484523	-0.720883	-0.661681	-0.747366	-0.879729	-0.842872	-0.628514	-0.557882	-0.807451	-0.689582	-0.290241	-0.615697	-0.28237	-0.352329	-0.644705	-0.576332	-0.660306	-0.650937	-0.494135	-0.663723	-0.713414	-0.629849	-0.54744	-0.727996	-0.38972	-0.86248	-0.351477	-0.534596	-0.382183	-0.625058	-0.865038	-0.571167	-0.530078
lush	1.23867	1.1193	1.28632	1.40707	2.05407	1.442	1.14565	0.995384	1.2188	1.49186	0.975874	0.954038	1.46606	3.53146	2.11982	1.38994	0.971017	1.73406	0.602242	0.679333	2.46816	0.771024	0.806167	1.87669	1.25526	3.57927	2.07976	1.80795	1.31249	3.0676	0.957607	1.50405	2.63936	1.58533	1.87584	1.11102
CG5418	0.270891	0.523592	0.616596	0.84171	1.14889	0.302464	1.00066	-0.113203	0.721848	-0.201929	-0.0666944	0.0946506	0.0954191	0.269405	0.469359	0.361159	0.327254	0.146527	0.123351	0.342379	-0.05019	-0.164086	-0.0589357	-0.167789	0.531403	0.602857	0.355419	0.566732	0.420745	0.985293	0.344711	0.0671013	0.5902	0.396412	0.0174938	-0.0888691
resilin	-0.90202	-1	-0.957185	-0.987139	-0.952632	-1	-0.949099	-0.879638	-0.924154	-0.897706	-0.932273	-0.952475	-0.957311	-1	-0.932734	-1	-0.901196	-1	-1	-0.957086	-0.904431	-1	-1	-0.713209	-0.867372	-0.931645	-0.971479	-0.965225	-0.884422	-0.952029	-0.889803	-0.875646	-0.81504	-0.8529	-0.860024	-0.893478
CG13742	-0.166477	-0.376842	-0.231138	-0.0243221	-0.361081	0.0886458	-0.0495359	-0.395518	-0.321298	0.0447468	-0.121888	-0.0972563	0.161282	0.230956	0.394436	0.221153	0.217381	0.446295	0.180881	0.239266	0.131494	0.361404	0.392422	0.166127	-0.0577529	0.257238	-0.197326	0.371974	0.201313	0.0380824	-0.127905	-0.0300073	0.0839966	-0.109954	-0.0368333	0.117361
CG4174	-0.761238	-0.917016	-0.777014	-0.873382	-1	-0.878054	-0.859622	-0.847599	-0.85266	-0.933674	-0.832517	-0.881278	-0.772354	-0.852069	-0.961333	-0.952735	-0.948546	-0.847057	-0.914908	-0.892544	-0.888444	-0.854351	-0.364669	-0.556549	-0.780408	-0.857841	-0.7941	-0.843537	-0.865241	-0.938852	-0.869242	-0.766533	-0.777417	-0.757214	-0.879673	-0.787276
Ilp8	-0.459908	-0.230927	-0.209354	-0.0546119	0.197868	0.323093	0.326688	-0.202681	-0.0954592	0.346538	-0.398209	1.20369	0.0477209	0.26364	0.224281	0.0937588	0.131484	-0.171449	-0.148231	0.0852543	-0.0436796	0.226509	0.0235814	0.184587	-0.387569	0.0413071	-0.430724	0.177018	0.251584	0.10226	0.140946	-0.264704	-0.110716	-0.372441	-0.502816	-0.385999
snoRNA:Me28S-U2134b	-0.287112	-0.216919	-0.369725	0.203453	0.146772	-1	-1	0.754364	0.855237	-1	-1	-1	-0.210639	-1	0.109355	0.274467	-1	-0.156642	-0.279981	-0.368517	-0.608874	0.327001	-0.0416827	-0.263029	-0.234013	-0.0873453	-0.21232	0.221077	-0.185624	-1	0.107666	-1	0.0470096	-0.360475	-0.450786	-0.154863
CG33958	-0.0184217	-0.247732	0.0942556	-0.117531	-0.459791	-0.117544	0.187795	-0.248933	0.0122202	-0.491053	-0.12148	-0.184815	0.187989	0.216557	0.136858	-0.106636	-0.115723	0.0994016	0.0695287	0.0745822	0.240032	0.230117	0.220103	0.130501	0.0763215	0.116432	-0.00528558	0.170746	-0.282897	0.116263	-0.0386356	-0.114022	-0.0740328	0.326981	0.0929632	0.154488
CR43467	-0.856004	-0.89041	-0.978525	-0.924815	-0.952831	-0.85873	-0.949312	-1	-0.924469	-0.948165	-1	-0.906852	-0.929831	-0.899738	-1	-0.927149	-0.920753	-0.968972	-0.974665	-0.936364	-0.951628	-1	-0.939229	-0.96104	-0.945705	-1	-0.943747	-0.948365	-0.9413	-1	-0.933157	-0.910468	-0.986032	-1	-0.946132	-0.938429
CG43689	0.634525	0.437588	0.457827	0.329715	-0.493831	0.281538	0.349577	0.229296	0.291952	-0.635572	0.422819	0.251009	0.482964	0.456422	0.568926	0.506282	0.408851	0.423731	0.702124	0.524967	0.593913	0.682733	0.401634	0.611583	0.76982	0.62854	0.722763	0.592319	-0.0656732	0.124584	0.665175	0.733704	0.679523	0.804263	0.715428	0.650114
Gr61a	-0.0377398	-0.0141417	-0.0886987	0.0893853	-0.171562	-0.15997	-0.312683	-0.363574	-0.0813544	-0.244157	-0.217	-0.304582	0.828554	0.837507	0.707676	1.06962	0.91209	0.881483	0.572492	0.591992	0.792712	1.03903	0.920628	1.34508	0.331136	0.274243	0.362757	0.555251	0.585495	0.69183	0.640886	0.378781	0.455962	0.639418	0.482909	0.496738
CG33798	-1	-1	-1	-0.871164	-0.879582	-0.924276	-1	-0.920395	-1	-0.635484	-1	-1	-1	-1	-1	-1	-1	-1	-1	-1	-1	-1	-1	-0.806682	-0.797522	-1	-1	-1	-0.592595	-0.878087	-1	-1	-1	-1	-1	-1
CG13358	-0.826113	-0.688743	-0.735382	-0.865214	-0.808486	-0.706056	-0.698126	-0.804175	-0.879038	-0.657592	-0.674503	-0.60822	-0.630444	-0.766532	-0.4887	-0.638867	-0.648774	-0.675709	-0.824033	-0.628699	-0.714936	-0.775949	-0.68789	-0.608465	-0.710382	-0.858329	-0.729495	-0.745766	-0.8279	-0.832313	-0.745512	-0.771152	-0.763547	-0.847096	-0.735531	-0.690301
MCO3	-1	-0.981932	-1	-0.951526	-1	-0.873034	-0.935557	-0.941333	-0.935427	-0.669977	-0.942364	-0.939813	-0.981745	-1	-0.971095	-1	-0.974215	-0.960479	-0.874975	-0.945629	-0.984374	-0.925823	-0.821246	-0.64414	-0.965085	-0.977909	-1	-1	-0.871923	-1	-0.928946	-0.930883	-0.930005	-1	-0.931534	-0.96037
CG15337	-0.160789	-0.37135	-0.308515	0.36296	-0.576999	-0.150789	-0.402386	-0.363	-0.0880334	1.23657	0.122674	0.324346	-0.366053	-0.586407	-0.45925	-0.336383	-0.841957	-0.300421	-0.631979	-0.545992	-0.477004	-0.673424	1.19576	1.98242	0.057401	-0.395883	-0.20614	-0.195033	0.758718	-0.0244836	-0.560103	0.0171436	-0.378418	-0.384393	-0.0861783	0.0974741
CG12821	-0.100797	0.180637	0.0624118	0.124622	0.387889	0.183816	0.173046	0.160353	0.070583	0.254536	0.109589	0.279389	0.433661	0.240755	0.442732	0.361605	0.390268	0.43255	0.119521	0.401897	0.468669	0.25306	0.466609	0.535737	0.285468	0.295501	0.297937	0.435624	0.574793	0.491807	0.281513	0.212539	0.368985	0.348577	0.490808	0.358886
l(3)mbn	-0.940086	-0.982853	-0.923405	-0.938951	-0.915363	-0.982123	-0.899384	-0.890638	-0.851299	-0.877427	-0.972372	-0.365537	-0.851094	-0.938415	-0.972563	-0.870179	-0.95146	-0.855439	-0.93934	-0.874227	-0.941579	-0.906791	-0.870575	-0.820231	-0.966855	-0.958368	-0.899311	-0.958137	-1	-0.942304	-0.986246	-0.955901	-0.949849	-0.896975	-0.852578	-0.962376
Ets96B	0.93929	1.15326	1.34648	1.0469	0.741508	1.19753	1.10425	1.51718	1.03834	0.746548	1.01674	0.816462	1.57532	1.56119	1.48381	1.45135	1.43365	1.43283	1.58061	1.7699	1.39823	1.84781	1.5625	1.68427	1.54133	1.65563	1.52911	1.76537	1.39906	1.74247	1.57641	1.54471	1.61406	1.71471	1.6729	1.66404
CG7512	-0.705815	-0.882254	-0.939136	-0.927911	-0.932707	-0.937409	-0.904416	-0.643797	-0.825339	-0.72472	-0.757118	-0.847117	-0.636646	-0.698252	-0.967533	-0.54367	-0.733593	-0.752193	-0.827181	-0.667547	-0.786862	-0.812931	-0.695632	-0.343015	-0.831396	-0.903184	-0.703105	-0.833732	-0.691242	-0.605614	-0.75916	-0.756372	-0.708831	-0.878658	-0.610735	-0.790107
CG34057	0.346312	0.564305	0.477817	0.624578	0.848424	0.708381	0.335759	0.492847	0.752681	0.856414	0.73169	0.541726	-0.368318	0.231788	-0.296334	-0.0638311	-0.22114	0.0387154	-0.105303	-0.15575	-0.320707	0.0652857	0.19529	0.142026	-0.534849	-0.359218	-0.29026	-0.331793	0.232861	-0.230171	0.0200719	0.0116772	-0.0897711	-0.0929599	-0.165857	-0.138415
CG42741	0.967395	1.07945	0.958491	0.934142	0.422572	1.11471	1.13196	1.24641	1.12945	0.273364	0.964034	1.09826	1.51072	1.15805	1.53767	1.31347	1.17732	1.40111	1.33919	1.38674	1.29083	1.31463	1.19949	0.983462	1.26551	1.42332	1.3739	1.39501	0.897808	1.43115	1.50916	1.40392	1.455	1.23988	1.33461	1.30405
CG42621	-0.24721	-0.669386	-0.865283	-0.507023	-0.480119	-0.444179	-0.891917	-0.901471	-0.840456	-1	-0.395357	-0.632406	-0.82353	-0.564602	-0.303674	-1	-0.647916	-0.808575	-0.842147	-0.864978	-0.64591	-0.557023	-0.409819	-0.762857	-0.4759	-0.441252	-0.594672	-0.518312	-0.579071	-0.713443	-0.555233	-0.58392	-0.53431	-1	-0.340643	-0.286049
ChLD3	-0.394141	-0.26691	-0.22738	-0.189643	-0.439185	-0.264505	0.057698	-0.223086	-0.115373	-0.350687	-0.256503	-0.139846	0.122411	-0.0115529	-0.0695723	0.223979	-0.0383295	0.112385	0.115793	0.241251	0.268605	0.535809	0.527307	1.00203	0.25967	-0.167536	-0.220389	0.11275	0.103351	0.15996	0.187261	0.253864	-0.13421	0.608736	0.400222	0.392842
CG3814	2.87116	3.62211	4.25035	3.18396	4.22973	4.86523	3.68281	3.86259	2.77276	4.75422	4.04545	4.40572	2.42386	2.93148	2.01958	2.0894	2.30291	2.78433	2.48538	2.50242	2.5681	2.24772	3.09794	3.56138	1.98282	1.79135	1.786	2.97306	2.79792	2.92475	2.18545	1.73604	2.35055	2.7868	2.80369	2.90527
CR43334	-0.536763	-0.503386	-0.553455	-0.448684	-0.719522	-0.512212	-0.68891	-0.589723	-0.517092	-0.686334	-0.675261	-0.631357	-0.634568	-0.51199	-0.553157	-0.546092	-0.584476	-0.346157	-0.450086	-0.575875	-0.450498	-0.588009	-0.559763	-0.512909	-0.705216	-0.710895	-0.733969	-0.591872	-0.816096	-0.727153	-0.728566	-0.750676	-0.749845	-0.624646	-0.761321	-0.734294
CG30157	0.651502	0.591142	0.715759	0.703022	0.64377	0.631826	0.493611	0.306313	0.149608	0.802433	0.307784	0.626026	0.700787	1.16197	0.534219	0.836522	0.546072	0.604296	0.501541	0.506023	0.740818	0.42512	0.847348	1.28463	0.458175	0.505952	0.2829	0.407193	0.777759	0.380057	0.312457	0.320746	0.42969	0.389589	0.585449	0.362717
Rgk2	0.899587	0.918456	1.07107	1.12167	0.431767	0.930031	1.27034	1.29929	1.46051	0.587474	1.22113	0.856878	1.02585	1.1024	1.08614	1.08163	1.05656	1.18389	1.24856	1.14012	1.07536	1.3373	1.28158	1.57646	1.27206	1.16578	1.29855	1.28162	0.588847	0.952132	1.156	1.2914	1.19864	1.53452	1.306	1.5892
CG42747	0.0606564	-0.0346262	0.154714	0.0136749	-0.37677	0.212699	0.203898	0.148221	0.259765	-0.114781	0.164625	0.0133332	-0.00581617	0.0575294	0.15905	-0.00353457	-0.0396322	0.212476	0.239709	-0.0490943	0.202787	0.168587	-0.055813	0.0866271	0.0610001	0.0252845	0.263376	0.0792868	-0.309594	-0.0647749	0.427538	0.144829	0.245338	0.169083	0.0700864	0.153392
mael	-0.00717811	-0.0698971	0.00671172	0.0921942	-0.101403	-0.0176759	0.103435	0.132706	0.228275	2.05841	-0.167414	-0.0349122	0.300853	0.089747	0.012756	0.116738	-0.187902	0.189223	-0.141649	0.149686	0.0938361	0.244146	1.43543	2.43267	0.139207	0.185747	0.54392	0.418002	1.46205	0.177382	-0.115375	0.0547004	0.235241	0.131695	-0.065134	1.19687
CR43972	-0.588724	-0.598033	-0.23949	-0.833579	-0.807893	-0.583092	-0.807139	-0.505936	-0.913999	-0.606529	-0.71457	-0.595171	-0.793627	-0.681846	-0.887008	-0.515062	-0.866707	-0.753489	-0.651409	-0.927502	-0.784959	-0.613975	-0.371693	0.160688	-0.864317	-0.77888	-0.48803	-0.80371	-0.72076	-0.602302	-0.608655	-0.878585	-0.639907	-0.694826	-0.716212	-0.561683
CG8800	-0.460427	-0.324823	-0.279278	-0.114358	-0.219217	-0.4694	-0.0535745	-0.591219	-0.449588	-0.693023	-0.648671	-0.634651	-0.0705787	0.00767842	-0.307498	0.0833832	-0.259304	0.120519	-0.893583	-0.335894	-0.547571	-0.273729	0.570748	0.571115	-0.302724	-0.496621	-0.173682	-0.205241	0.435452	0.25216	-0.0573086	-0.218175	-0.332303	-0.662103	-0.369617	-0.933599
RhoGAP54D	-0.438208	-0.360644	-0.278546	-0.242429	-0.372356	-0.0979885	-0.193784	-0.264442	-0.439182	-0.232731	-0.168699	-0.14661	-0.0813273	-0.0149862	-0.218777	-0.0644506	-0.106988	-0.0893219	-0.159055	-0.137475	-0.0844025	-0.300041	-0.0154047	0.419334	0.0958779	0.107518	0.199869	0.161906	0.139229	-0.026772	0.0457909	0.0324525	-0.0361745	-0.0536298	-0.0257506	0.178058
CG14395	-0.906833	-0.813576	-0.972758	-0.920479	-0.969843	-0.873638	-0.884524	-0.980276	-0.951539	-0.782454	-0.834352	-0.873235	-0.946177	-0.935476	-0.971237	-0.919198	-0.961682	-0.922389	-0.936444	-0.972694	-0.865753	-0.962619	-0.864547	-0.619765	-0.982524	-0.988967	-1	-0.892717	-0.925788	-0.910244	-0.950142	-0.976707	-0.973484	-0.986067	-0.909852	-0.93168
snoRNA:dmt-a	-0.311778	0.0244573	0.0342725	-0.169007	-0.632241	0.175182	0.414719	-0.351404	-0.0446091	0.187988	1.02363	0.649105	0.0320755	0.529141	-0.364401	0.369398	-0.00971145	0.535668	-0.610948	-0.390925	-0.46712	-0.433361	-1	0.461339	1.00552	0.637073	0.25667	0.313565	-0.37317	-0.087492	-0.12929	0.0831457	-0.405507	-1	0.351068	-0.34799
Ir31a	-0.618527	-0.790281	-0.769823	-0.777047	-0.932472	-0.576523	-0.709083	-0.642665	-0.698424	-0.925843	-0.842947	-0.954481	-0.482814	-0.667249	-0.369416	-0.164801	-0.330742	-0.311831	-0.33325	-0.296427	-0.308884	-0.71508	-0.651836	-0.479814	-0.848672	-0.478575	-0.668889	-0.663496	-0.655814	-0.686521	-0.515757	-0.606184	-0.659136	-0.518417	-0.671182	-0.789406
CG34273	-0.47259	-0.0961105	-0.351521	0.00879687	0.420608	0.0724848	-0.130548	-0.371059	-0.578839	-0.2411	-0.412066	-0.0653493	-0.750726	-0.704915	-1	-0.683853	-0.560491	-0.650365	-1	-1	-0.379276	-0.395001	-0.479788	-0.572078	-0.618872	-0.89408	-0.829572	-0.24342	-0.521935	-0.722211	-0.323552	-0.353519	-0.365642	-0.529887	-0.358553	-0.433181
Dbx	0.204684	0.00248404	-0.0753075	0.110242	-0.116266	-0.178401	-0.0517631	-0.0151273	0.17339	0.1901	0.0452693	0.0912993	0.155711	0.347884	0.354825	-0.113443	0.0927123	0.123909	-0.0283698	0.174515	0.289894	0.405579	0.0561954	0.141772	0.0287419	0.182382	0.175206	0.0113751	0.0315685	0.0727204	-0.0655817	0.175719	0.129266	0.108489	0.0728537	0.101446
CG10931	-1	-1	-1	-0.884626	-0.892196	-0.8364	-0.777253	-0.861024	-1	2.13981	-1	-1	-0.934374	-0.940643	-1	-1	-1	-0.963848	-0.941536	-1	-1	-0.954364	0.608273	1.90213	-0.968065	-1	-0.726367	-0.608338	0.921083	-1	-1	-1	-1	-1	-1	0.565287
CG17906	-0.837966	-0.657304	-0.311703	-0.585107	-0.114936	-0.235308	-0.887647	-0.587354	-0.914755	-0.359123	-0.851527	-0.705351	0.276385	0.191324	-0.0626934	-0.43062	-0.635144	-0.233059	-0.320244	0.12074	0.00978207	-0.314717	-0.417967	0.484356	-0.524005	-0.730761	-0.617123	-0.0996101	0.311123	-0.514254	-0.484363	-0.130872	-0.267917	-0.499204	-0.572749	-0.800715
CG11159	-1	-0.53457	-0.745502	-0.794692	-0.285134	-0.517639	-0.731625	-0.811834	-0.793789	-0.789773	-0.503844	-0.807177	-0.939615	-1	-0.81621	-1	-0.835128	-0.871411	-0.894365	-1	-0.369314	-1	-0.947727	-1	-0.832204	-0.791632	-0.826391	-0.726974	-0.876949	-0.634056	-0.8603	-1	-0.777355	-0.908503	-0.923605	-0.59162
sphinx	-0.000313989	0.0442809	0.0155502	-0.118288	1.33735	-0.272605	-0.163385	-0.534503	-0.13064	0.36049	-0.0652634	0.182885	0.237675	1.11149	1.21897	1.01606	2.26671	1.02915	1.09437	0.698838	0.494242	0.836591	0.93266	1.0455	0.067416	0.567675	0.641095	0.34949	1.18154	0.601511	0.424843	0.426782	0.754128	0.638786	0.666227	0.242116
CR32027	-0.200921	-0.550948	-0.400281	-0.228396	-0.662455	-0.139278	-0.294898	-0.270108	-0.26609	-0.579372	-0.535761	-0.564203	-0.439912	-0.223048	-0.296683	-0.369855	-0.195593	-0.0166131	-0.356563	-0.476782	-0.161021	-0.337934	-0.329641	-0.29761	-0.314412	-0.232327	-0.365974	-0.52975	-0.559779	-0.382671	-0.561464	-0.440308	-0.583841	-0.640954	-0.349266	-0.317259
Or82a	-0.939959	-0.83673	-0.948378	-0.909179	-0.942906	-0.767422	-0.95882	-0.855656	-0.715947	-1	-1	-0.852029	-1	-0.521439	-1	-0.911984	-0.85873	-0.962399	-0.939212	-1	-0.885194	-1	-1	-0.877447	-0.902562	-0.628824	-0.8048	-0.958048	-0.894782	-0.833065	-0.893252	-0.955808	-0.838868	-0.89676	-0.832355	-0.925552
CG34328	0.0715579	-0.302859	-0.391482	-0.246145	-0.56827	-0.634924	-0.414609	-0.316314	0.250396	2.33451	-0.0792855	-0.447425	-0.0170427	-0.828923	0.220486	-0.759733	-0.0823556	-0.122885	-0.00597374	-0.203978	-0.496605	-0.529766	0.607469	1.79449	-0.259368	-0.116233	-0.298652	0.0143048	1.1422	-0.839353	-0.711671	-0.0770155	-0.310529	-0.194363	-0.384173	0.539476
l(2)03659	-0.767333	-0.770153	-0.501678	-0.797716	-0.740076	-0.714659	-0.790226	-0.825399	-0.968034	-0.843776	-0.836893	-0.592202	-0.947035	-0.952115	-0.98578	-0.942751	-0.877972	-0.932946	-0.968388	-0.986504	-0.917804	-0.91559	-0.852562	-0.509372	-0.965814	-0.957064	-0.887903	-0.884248	-0.874513	-0.869434	-0.964786	-0.899618	-0.890202	-0.91964	-0.911271	-0.877525
snoRNA:Psi18S-1377c	-1	-0.315017	-1	-0.54989	-0.576464	-0.723524	-1	-0.262674	-0.548065	-1	-1	-1	-1	-1	-0.277043	-0.659877	-1	-0.709347	-1	-1	-0.566978	-0.353521	0.271077	-0.752255	0.982939	0.452082	0.280205	-1	-0.286747	-0.241907	-0.783036	0.633845	-0.000871914	-1	-1	-0.466305
CR40641	-0.661897	-0.863431	-0.705574	-0.510656	0.00251512	-0.398122	-0.76128	-0.477974	-0.654631	0.07351	-0.785182	-0.708692	-0.413492	-1	-0.690638	-0.016415	-0.561508	-0.370523	-0.876798	-0.796751	-0.621184	-0.570907	-0.823805	0.00730031	-0.255435	-0.314904	-0.414824	-0.549265	-0.926533	-0.490525	-0.837379	-0.745028	-0.684104	-1	-0.826703	-0.713815
Cpr78Ca	-0.921151	-0.955006	-0.86734	-0.959274	-0.853702	-0.907697	-1	-1	-0.919298	-0.387759	-1	-0.853233	-0.826187	-0.842243	-0.79509	-0.941227	-0.93604	-0.9505	-1	-1	-1	-0.87777	-0.960678	-0.802763	-1	-0.945102	-0.868066	-1	-0.736935	-0.924052	-0.928566	-1	-0.790604	-0.865038	-1	-0.683829
CG42598	-0.931235	-0.960819	-0.884033	-0.738103	-0.645831	-0.735806	-0.819782	-0.652907	-0.67808	-0.614546	-0.763564	-0.955927	-0.921889	-0.861946	-0.937588	-0.899333	-0.890587	-0.796267	-0.930381	-0.828987	-0.868865	-1	-0.932326	-0.763364	-0.888609	-0.905881	-0.884672	-0.951908	-0.918737	-0.870453	-0.907563	-0.807252	-0.961354	-1	-0.949826	-1
c(2)M	-0.641392	-0.865214	-1	-0.764867	-0.754405	-0.945782	-0.857871	-0.751309	-1	-0.529235	-0.787914	-0.867026	-0.800344	-0.559362	-0.789288	-0.326922	-0.878875	-0.482352	-0.793508	-0.582357	-0.56805	-0.730979	-0.622648	-0.194914	-0.807473	-0.836631	-0.740152	-0.603285	-0.463079	-0.677328	-0.563772	-0.318519	-0.619496	-0.682343	-0.367029	-0.63931
Cks30A	-0.824752	-0.501501	-0.755676	-0.662784	-0.636792	-0.764605	-0.7661	-0.721162	-0.878074	0.575657	-0.741412	-0.620461	-0.266768	0.246507	0.00984262	-0.288655	-0.68595	-0.21566	-0.129419	-0.0832362	0.064131	-0.283018	0.669562	0.902883	0.200249	0.348083	0.152639	0.466592	0.53142	0.676097	-0.336841	-0.0634791	0.326774	0.345229	0.208409	0.307698
Vsx1	-0.570862	-0.847315	-0.722458	-0.817909	-0.933722	-0.779767	-0.694267	-0.769047	-0.526378	-0.975327	-0.742301	-0.605517	-0.774481	-0.524674	-0.690793	-0.81818	-0.557002	-0.473154	-0.658242	-0.75599	-0.597777	-0.697031	-0.576908	-0.770919	-0.6954	-0.772443	-0.570427	-0.729562	-0.7779	-0.710484	-0.808927	-0.673945	-0.618438	-0.651112	-0.690618	-0.832192
CG9194	0.625206	0.533177	0.471492	0.982467	0.37158	0.624033	0.697591	0.563872	0.789617	0.439788	0.291947	0.618841	1.12317	1.02263	1.07267	1.25834	1.11261	1.16195	0.963077	0.926377	1.07349	1.03532	0.944324	1.22811	0.739736	0.750552	0.81164	0.995334	0.821087	0.991805	0.941412	0.844759	0.907434	0.636264	0.795341	0.690203
CR43607	-0.912929	-0.855627	-0.92504	-0.911294	-1	-0.898121	-1	-1	-1	-0.524612	-1	-1	-0.68022	-1	-1	-0.701064	-0.861966	-0.305335	-0.911855	-1	-0.651956	-0.628441	-0.485597	0.159015	-0.904827	-1	-1	-1	-0.330321	-1	-1	-1	-1	-1	-1	-0.892273
Or67a	-0.908139	-0.947479	-0.920899	-0.92925	-0.87081	-0.816902	-0.846856	-0.970936	-0.952229	-1	-1	-0.912315	-0.775248	-0.376192	-0.95768	-0.93145	-0.889531	-0.859706	-0.952755	-1	-0.826048	-0.963153	-0.931664	-0.730073	-1	-0.731844	-0.822717	-0.873957	-0.944782	-0.535785	-0.978731	-0.836103	-0.671237	-1	-1	-1
pre-mod(mdg4)-W	-0.689607	-0.60399	-0.814529	-0.798951	-0.928686	-0.789798	-0.759095	-0.606347	-0.747567	-0.676927	-0.657954	-0.578888	-0.567523	-0.589464	-0.774632	-0.540472	-0.880854	-0.738315	-0.717755	-0.675643	-0.622681	-0.725115	-0.678923	-0.630234	-0.679794	-0.490502	-0.722395	-0.488089	-0.869107	-0.530149	-0.660737	-0.673689	-0.592565	-0.495082	-0.744982	-0.698212
Tdc2	1.184	1.07795	1.12143	1.01948	0.82803	0.838685	0.924241	0.728434	1.11895	0.859055	0.984689	1.05883	1.35399	1.35304	1.24327	1.05238	1.44747	1.08063	1.6116	1.27473	1.55519	1.43612	1.38572	1.28581	1.32268	1.43815	1.55634	1.45264	1.23555	1.34832	1.36828	1.39097	1.48516	1.54059	1.62881	1.49678
CR30029	-0.758457	-0.793142	-0.524288	-0.645349	-0.880224	-0.283591	-0.913091	-1	-0.643865	-0.637275	-0.416364	-0.768916	-0.926967	-0.87075	-1	-1	-0.897628	-0.920536	-1	-1	-0.937318	-0.900079	-0.656374	-0.807687	-0.929686	-0.750545	-0.927164	-0.911487	-1	-0.663076	-1	-1	-0.928677	-1	-0.73915	-0.773061
CG10801	-1	-0.933248	-1	-0.959411	-0.889274	-0.930458	-0.945991	-1	-1	0.56607	-1	-1	-0.910774	-1	-1	-1	-1	-1	-1	-0.899481	-1	-1	0.314396	0.949203	-0.978035	-1	-0.868496	-0.972229	-0.23642	-1	-0.981869	-1	-0.955768	-0.931172	-1	-0.664714
Prosbeta2R1	-1	-0.961571	-0.94198	-0.965224	-0.935845	-0.920978	-1	-0.916933	-1	1.94616	-1	-0.9148	-0.961176	-1	-1	-1	-1	-1	-1	-1	-0.934218	-1	1.04668	1.91486	-1	-1	-0.88683	-0.952829	0.697886	-1	-1	-0.950314	-1	-1	-1	-0.691265
AGO3	0.0475933	-0.0753041	-0.103352	0.221615	0.269219	0.306449	-0.274638	0.0037724	0.0763583	0.618136	-0.0935797	0.19984	-0.314706	-0.452787	-0.465784	-0.43366	-0.477156	-0.360904	-0.790092	-0.706147	-0.461809	-0.657732	-0.0643044	0.645931	-0.542729	-0.519657	-0.0834808	-0.0971465	0.203667	-0.125535	-0.308583	-0.32196	-0.145246	-0.551674	-0.400013	0.0891251
CG15478	-0.46949	-0.677339	-0.673462	-0.676123	-0.810042	-0.841453	-0.775666	-0.72024	-0.7342	-0.760333	-0.707021	-0.789743	-0.674331	-0.561149	-0.682743	-0.780313	-0.714099	-0.832977	-0.767297	-0.800227	-0.790345	-0.630991	-0.758559	-0.714379	-0.701278	-0.55851	-0.659067	-0.709729	-0.766311	-0.720437	-0.776783	-0.71681	-0.797054	-0.693079	-0.740707	-0.718577
CG16959	-0.573981	-0.515032	-0.490735	-0.614405	-0.83345	-0.44697	-0.713786	-0.706099	-0.766221	-0.681607	-0.695545	-0.297287	-0.165723	-0.020635	0.0355703	-0.131028	-0.113296	-0.0786812	-0.256675	0.0496596	0.153196	0.103625	-0.0206555	-0.0771342	-0.589135	-0.641992	-0.65699	-0.451931	-0.657931	-0.501051	-0.303276	-0.382385	-0.533153	-0.501976	-0.401998	-0.472449
CG6696	-0.275108	-0.251871	-0.0709897	-0.53127	-0.0692263	-0.470986	-0.277474	-0.830921	-0.401376	0.241897	-0.368197	-0.179702	0.0215053	0.435234	-0.329932	-0.108709	-0.59492	-0.118381	0.117423	-0.102403	-0.226355	0.27655	0.0266914	0.0882776	-0.317013	-0.395883	-0.402021	-0.266703	-0.246916	-0.385064	-0.290505	-0.0323538	-0.284296	-0.125998	-0.272975	0.0232711
Rbf2	-0.104363	-0.189638	-0.102244	-0.0772349	-0.345666	0.120013	-0.183681	-0.20369	-0.28852	-0.0172431	-0.0602321	-0.113103	0.137256	0.378753	0.133342	0.167766	0.41649	0.0959628	0.290482	-0.125206	0.0685025	0.337507	0.153575	0.282324	0.198081	0.249607	0.175508	0.238845	0.148491	0.428198	-0.0854176	-0.0354641	0.048947	0.0162559	0.275023	0.143506
CG18808	-0.8507	-0.832677	-0.752758	-0.688722	-1	-0.646284	-0.769373	-0.733975	-0.709184	0.627635	-0.778784	-0.570886	-0.679796	-0.581635	-0.700888	-0.817939	-0.730614	-0.679903	-0.848899	-0.607905	-0.808844	-0.669544	0.701521	1.74134	-0.690789	-0.797663	-0.913277	-0.796601	0.0997177	-0.902467	-0.864436	-0.600296	-0.861108	-0.673719	-0.962482	-0.816194
Drep-2	1.27375	1.17957	1.06079	0.968773	0.054415	0.994686	0.950921	0.915258	0.797174	0.0929786	1.02924	0.833586	1.28079	1.12139	1.44588	1.1161	1.00945	1.19941	1.44947	1.26808	1.32559	1.45351	1.34442	1.38221	1.62248	1.52366	1.51903	1.30322	0.491057	0.984356	1.31937	1.2407	1.34709	1.6343	1.41447	1.50652
CG10486	-0.885035	-0.934045	-0.853784	-0.954966	-1	-0.948161	-0.920681	-0.963426	-1	-0.221341	-1	-1	-0.869689	-1	-1	-0.935052	-0.976058	-0.892562	-0.940643	-1	-1	-1	-0.15553	0.84635	-0.951629	-0.558571	-0.885653	-1	-0.74069	-0.971496	-1	-1	-0.903474	-0.923714	-1	-0.760112
CG14221	0.572907	0.406297	0.255281	0.708386	0.317241	0.328444	0.442889	0.306313	0.396619	0.580369	0.57275	0.575686	0.56854	0.634467	0.457055	0.588741	0.789883	0.575956	0.561664	0.3058	0.507744	0.577726	0.341006	0.535532	0.021696	-0.0465564	-0.164686	0.0174716	-0.0711266	0.233226	2.0305	0.172552	-0.135683	-0.111259	0.0849188	-0.26255
CG6462	-0.0990261	0.127088	0.674208	0.528349	0.88305	0.525643	0.244013	0.287603	0.147666	0.417147	-0.300064	-0.00997431	0.0103712	0.120175	0.290934	-0.345202	-0.00390762	-0.134013	-0.363321	-0.297247	-0.243349	0.0797318	-0.109959	-0.106909	0.202254	0.00617496	-0.128115	-0.438864	0.268262	0.292498	-0.323635	-0.20497	-0.246873	-0.600827	-0.418523	-0.546062
CG43174	-1	-0.702848	-0.699247	-0.623063	-0.621873	-0.854644	-0.719121	-0.811619	-1	-0.228724	-0.832275	-0.604958	-0.963423	-0.646017	-1	-0.658768	-0.948469	-0.88363	-1	-0.94519	-0.87854	-0.85414	-0.405636	-0.0438101	-0.964801	-0.871255	-0.927945	-0.870562	-0.433059	-0.716898	-0.807781	-0.863864	-0.862175	-0.944342	-0.628151	-0.921173
Osi2	-0.845384	-0.515893	-0.773848	-0.734803	-0.719134	-0.819785	-0.793157	-0.810888	-0.60098	-0.44111	-0.475492	-0.218575	-0.866845	-0.698183	-0.793773	-0.829308	-0.730493	-0.950165	-0.604886	-0.898477	-0.587765	-0.736596	-0.614804	-0.66027	-0.792104	-0.673638	-0.688433	-0.91742	-0.511681	-0.652752	-0.859586	-0.941472	-0.829018	-0.800739	-0.730945	-0.387724
Dic4	-0.923653	-1	-1	-1	-1	-1	-0.973533	-0.975934	-0.9604	0.579574	-1	-1	-1	-1	-1	-0.971272	-0.908089	-1	-1	-1	-0.943802	-0.969475	0.45286	0.996553	-0.896384	-1	-0.977895	-1	-0.146974	-1	-1	-1	-1	-0.900837	-0.971858	-0.882761
Ssl	-0.407464	-0.346629	-0.172961	-0.19444	0.0133165	0.177024	-0.24116	-0.177414	-0.509865	3.29182	-0.450904	-0.0231297	0.0657774	-0.508112	-0.179047	-0.413845	-0.371024	-0.458131	-0.514522	-0.252493	-0.367752	-0.225523	1.64938	2.93595	-0.480949	-0.743208	-0.285126	-0.33302	1.54994	-0.479541	-0.480515	-0.729124	-0.474556	-0.375362	-0.423801	0.983223
CG7248	-0.845441	-0.799875	-0.477711	-0.68949	-0.119148	1.44185	0.17536	-0.147963	-0.549255	-0.460719	-0.145765	0.204998	-1	-1	-1	-1	-1	-0.966599	-1	-1	-1	-1	-1	-0.971911	-1	-0.981348	-1	-1	-1	-1	-1	-1	-1	-1	-1	-0.983156
iav	0.381442	0.262472	0.0362416	0.221196	0.0670699	0.252005	-0.147656	-0.0920932	-0.0538941	0.110823	0.127268	0.431346	0.300726	0.39012	0.363267	0.800909	0.820453	0.478407	0.0351365	-0.0250416	0.330381	0.370094	0.280038	0.183433	0.324058	0.423687	0.202842	0.513134	0.227987	0.484099	0.699714	0.757937	0.482135	0.256056	0.429042	0.23009
Or98b	-1	-0.965717	-1	-0.938614	-0.942712	-0.797786	-1	-1	-0.879189	-1	-0.791422	-0.961429	-1	-1	-0.945337	-1	-0.903979	-0.889649	-0.880486	-0.948082	-1	-1	-1	-0.968264	-0.617247	-0.660884	-0.898763	-0.877229	-0.963945	-1	-0.892895	-0.714899	-0.778428	-0.947278	-0.956078	-0.78659
CG43315	-1	-0.76836	-0.76549	-0.494349	-0.166213	-0.687141	-0.72447	-0.288672	-0.492336	-0.596263	-0.642	0.0786624	-0.231134	-0.722892	-0.27526	0.291482	0.319244	0.857089	0.0303837	0.104345	0.40896	-0.0807095	-0.315046	-0.484417	-0.160096	-0.487537	-0.232782	0.837255	1.06246	0.0632717	-0.0168561	0.705184	0.501869	0.285532	0.360214	-0.746078
[truncated: 11,645 more rows]

## Sheet: Circadian Gene lookup
5.56802	5.7091	5.59233	5.15388	5.22239	5.16798	5.66442	5.48635	5.56988		47.4397	52.3132	48.2458	35.6019	37.3334	35.9516	50.7177	44.8288	47.5008	0.00119862	0.00122909	0.508227
[truncated: 10 more rows]
