# Supplementary material for: Circadian gene variants and the skeletal muscle circadian clock contribute to the evolutionary divergence in longevity across Drosophila populations
Source: HighWire-hosted journal article supplement (doi:10.1101/gr.246884.118), 2019-06-27
Supplement: Supplemental_Table_S7.xlsx [file Supplemental_Table_S7.xlsx]

## Sheet: Legend
Supplemental Table S7
JTK analysis of muscle cyclic genes in B3 and O3. Analysis was performed using log2 FPKM values transformed after the addition of 2 to prevent negative numbers and reduce the effect of low expressing genes.

## Sheet: JTK_results for B3
Probeset -B3	BHQ	ADJP	PER	LAG	AMP	ZT0B3A	ZT0B3B	ZT0B3C	ZT6B3A	ZT6B3C	ZT12B3A	ZT12B3B	ZT12B3C	ZT18B3B	ZT18B3C
Ugt35b	0.0730731	0.000555556	24	3	1.18892	5.92038	5.97159	6.08884	5.28916	5.29035	3.95162	4.00875	3.8246	4.1932	4.36601
tim	0.0730731	0.000555556	24	18	1.15634	5.61293	5.74989	5.6365	4.44927	4.2776	6.69419	6.64277	6.71428	7.33726	7.22816
CG10513	0.0730731	0.000555556	24	3	0.863923	5.16561	5.30793	5.15327	4.32083	4.81175	3.65357	3.55746	3.74854	3.9315	4.17106
CG12116	0.0730731	0.000555556	24	3	0.663746	7.19939	7.22414	7.33523	6.61607	6.62917	5.81509	5.80276	6.02572	6.0625	6.29341
CG10553	0.0730731	0.000555556	18	0	0.661578	5.35475	5.86448	5.60123	4.38407	4.47958	4.89433	4.72306	4.57873	5.21229	5.111
CG11529	0.0730731	0.000555556	24	15	0.651593	2.67024	2.66231	2.31521	2.85371	2.83005	3.86797	3.76639	3.9965	2.93123	3.2367
Invadolysin	0.0730731	0.000555556	24	3	0.577664	5.52144	5.63781	5.53879	4.81429	4.76689	4.3909	4.33694	4.37577	4.7045	4.65214
CG14880	0.0730731	0.000555556	24	15	0.569925	3.97093	3.86986	3.93121	4.16121	4.18295	5.1486	5.07572	5.08504	4.3887	4.41853
Pdp1	0.0730731	0.000555556	24	18	0.519902	4.84226	4.74845	4.62114	4.60226	4.48194	5.21719	5.235	5.39972	5.73141	5.40804
CG18179	0.0730731	0.000555556	24	15	0.491691	1.62044	1.54056	1.51023	1.80102	1.72853	2.64141	3.12771	3.14806	1.85791	1.85494
CG17108	0.0730731	0.000555556	18	0	0.482243	10.8427	10.7984	10.8651	9.80698	9.69786	10.251	10.1775	10.4581	10.7327	10.7401
CG3376	0.0730731	0.000555556	18	3	0.479965	5.06768	4.71563	5.19273	4.49342	4.52068	3.96277	4.22797	4.03559	5.41153	5.23089
CG14687	0.0730731	0.000555556	24	0	0.441148	7.10163	7.12377	6.94108	6.47776	6.34241	6.22783	6.26468	6.26082	6.68673	6.80313
CG31189	0.0730731	0.000555556	24	3	0.41942	4.58624	4.61138	4.62032	4.56173	4.46325	3.8507	3.98046	3.99015	4.02717	4.03419
b6	0.0730731	0.000555556	18	3	0.417637	2.18702	1.96851	2.17143	1.65494	1.57573	1.38912	1.43181	1.35923	2.19551	2.26287
Hsp83	0.0730731	0.000555556	24	12	0.413171	8.61422	8.51206	8.43026	9.19853	9.18549	9.25189	9.37189	9.26036	8.99921	8.89988
CG32369	0.0730731	0.000555556	24	3	0.371117	3.84682	3.91196	3.82774	3.5257	3.49216	3.05154	3.032	2.99892	3.39123	3.31757
CG6385	0.0730731	0.000555556	24	15	0.345123	3.77367	3.67547	3.63147	3.95854	4.01149	4.43307	4.49768	4.53496	4.11955	4.04083
CG13618	0.0730731	0.000555556	24	15	0.331389	3.48616	4.02651	3.83922	4.18981	4.2527	4.65073	4.57805	4.45239	4.39599	4.35741
CG4576	0.0730731	0.000555556	24	15	0.326608	1.87126	1.80496	1.9533	1.9925	2.13251	2.51103	2.45439	2.62136	2.25299	2.20444
CG13857	0.0730731	0.000555556	24	21	0.321978	1.88654	1.74991	1.73243	1.43715	1.27709	1.50054	1.5159	1.50736	2.1755	2.18224
aralar1	0.0730731	0.000555556	24	0	0.304692	6.45081	6.43069	6.51091	5.89602	5.94112	5.69699	5.85845	5.87833	6.06661	6.09374
CG32121	0.0730731	0.000555556	24	12	0.301119	4.64733	4.81893	4.76865	5.15349	5.24478	5.40728	5.29473	5.37803	5.06954	5.09618
regucalcin	0.0730731	0.000555556	18	12	0.297607	7.78041	7.80244	7.8524	8.03341	8.11464	8.28754	8.25902	8.41385	7.39489	7.73568
cry	0.0730731	0.000555556	24	6	0.296927	6.56531	6.58104	6.61638	6.74326	6.76177	6.33454	6.5275	6.32334	5.48698	5.5194
Ugt86De	0.0730731	0.000555556	24	3	0.295706	1.6417	1.61525	1.6352	1.35827	1.40172	1.09442	1.1214	1.10114	1.32445	1.15399
l(1)G0148	0.0730731	0.000555556	18	3	0.287314	5.0967	5.14702	5.07236	4.96871	4.92481	4.58545	4.57266	4.68424	5.17813	5.17984
Cpr65Au	0.0730731	0.000555556	18	12	0.282922	8.74181	8.7576	8.74271	8.9049	8.934	9.19921	9.14237	9.28354	8.33657	8.61166
CG8008	0.0730731	0.000555556	24	18	0.268508	3.35493	3.43486	3.36032	3.3177	3.15811	3.56089	3.61696	3.65481	3.99928	4.02855
glob1	0.0730731	0.000555556	18	0	0.268031	7.03664	7.0457	7.26574	6.65532	6.60275	6.69755	6.80227	6.77745	6.93079	6.94723
CG6006	0.0730731	0.000555556	24	9	0.256183	3.29165	3.2174	3.28822	3.61118	3.58684	3.57969	3.55081	3.52896	3.11296	3.16347
santa-maria	0.0730731	0.000555556	18	9	0.254256	4.98804	4.909	4.98815	5.42618	5.39145	5.32131	5.30456	5.25707	5.00505	5.06582
CG30083	0.0730731	0.000555556	24	9	0.252358	3.70026	3.51494	3.50224	3.85913	4.02113	3.79477	3.82025	3.84764	3.3679	3.29267
Magi	0.0730731	0.000555556	24	3	0.247721	2.87292	2.89962	2.79475	2.78538	2.74894	2.42477	2.4253	2.50278	2.54731	2.5212
CG17278	0.0730731	0.000555556	24	9	0.242891	4.87036	4.91377	4.90134	5.33474	5.35815	5.06474	5.08476	5.16944	4.48807	4.82594
CG1315	0.0730731	0.000555556	24	12	0.238569	3.55171	3.80781	3.58855	4.02151	4.0489	4.14519	4.15068	4.22804	3.9998	3.93167
CG6356	0.0730731	0.000555556	18	12	0.236823	4.37776	4.3413	4.33067	4.60409	4.59918	4.82542	4.69445	4.76648	4.28101	4.23833
ninaD	0.0730731	0.000555556	18	12	0.23318	4.12347	4.12344	4.11121	4.1813	4.23907	4.56181	4.42427	4.57197	3.71076	3.97268
CG5707	0.0730731	0.000555556	24	12	0.222005	5.35502	5.52111	5.45803	5.7208	5.66899	5.9665	5.91375	5.91253	5.58108	5.65755
Inos	0.0730731	0.000555556	18	12	0.2191	7.55631	7.5691	7.5458	7.85002	7.78705	7.90451	7.86746	7.89933	7.21908	7.4657
CG13315	0.0730731	0.000555556	18	3	0.208982	9.33415	9.73008	9.6464	9.19662	9.27681	9.04388	9.16216	9.17567	9.79017	9.7754
CG6083	0.0730731	0.000555556	24	12	0.19682	4.15847	4.29114	4.27557	4.42375	4.40326	4.58616	4.6816	4.69643	4.30538	4.2924
Tg	0.0730731	0.000555556	24	6	0.195492	4.79251	4.78243	4.78319	4.89831	4.8465	4.61868	4.58221	4.56706	4.3419	4.50596
CG1732	0.0730731	0.000555556	24	12	0.192057	4.81427	4.89811	4.78597	5.06779	5.09393	5.2392	5.23744	5.13101	5.036	4.90437
CG7509	0.0730731	0.000555556	24	12	0.185236	1.59353	1.64139	1.80628	1.91368	1.98758	2.15342	2.06824	2.04838	1.84514	1.90331
Df31	0.0730731	0.000555556	18	9	0.184065	4.84334	4.78656	4.80389	5.26549	5.10863	5.00057	5.05922	5.02978	4.97402	4.99935
Sod3	0.0730731	0.000555556	24	9	0.178368	4.42124	4.50211	4.43826	4.66257	4.75436	4.64846	4.59274	4.64183	4.0902	4.30377
CG43103	0.0730731	0.000555556	24	3	0.170744	6.14123	5.9508	6.12163	5.94702	5.84935	5.62749	5.79158	5.7056	5.81203	5.83373
CG3823	0.0730731	0.000555556	18	12	0.168404	3.14967	3.09944	3.17664	3.29706	3.27417	3.3585	3.52322	3.47109	3.03533	3.09425
Gfat1	0.0730731	0.000555556	24	21	0.16256	5.14076	5.14025	5.00686	4.85403	4.91087	4.99644	4.94419	4.99887	5.23595	5.37477
btl	0.0730731	0.000555556	18	12	0.162013	2.30608	2.30475	2.41924	2.44153	2.48708	2.68528	2.60236	2.62731	2.25253	2.20549
CG18858	0.0730731	0.000555556	18	6	0.158387	2.80905	2.78155	2.80955	3.0333	3.01744	2.73017	2.74241	2.54845	2.95223	2.99071
nrv2	0.0730731	0.000555556	24	3	0.158178	6.76239	6.89802	6.77964	6.67754	6.72879	6.53199	6.46959	6.52143	6.58434	6.59807
CG8128	0.0730731	0.000555556	24	21	0.154121	5.97768	6.0517	6.06189	5.71448	5.78512	5.84393	5.93101	5.91952	6.1473	6.10712
CG11073	0.0730731	0.000555556	18	12	0.151514	6.55407	6.51924	6.63228	6.81827	6.75534	6.86542	6.82768	6.93635	6.37694	6.49757
CG17691	0.0730731	0.000555556	24	6	0.146638	7.44195	7.48859	7.39143	7.53058	7.49146	7.3225	7.29115	7.28069	7.23457	7.1771
Ent2	0.0730731	0.000555556	24	18	0.140504	4.63604	4.70081	4.67169	4.61039	4.57066	4.76937	4.78	4.77639	5.05365	4.92189
Mpcp	0.0730731	0.000555556	24	0	0.13877	8.52644	8.49118	8.55861	8.29492	8.31721	8.21293	8.25261	8.25299	8.31924	8.38094
magu	0.0730731	0.000555556	24	12	0.137739	5.55592	5.56869	5.59071	5.76348	5.75222	5.85964	5.78455	5.83147	5.62034	5.69744
Cyp9f2	0.0730731	0.000555556	24	6	0.132304	7.32784	7.32616	7.41211	7.45119	7.51998	7.27596	7.23997	7.21398	7.03706	7.20834
Rab8	0.0730731	0.000555556	18	9	0.112087	6.60568	6.5843	6.63565	6.80829	6.8475	6.77127	6.72661	6.73574	6.67682	6.64575
Jupiter	0.0730731	0.000555556	24	6	0.111539	5.38351	5.38744	5.33749	5.41424	5.40085	5.23876	5.27913	5.24311	5.08652	5.21907
CHIP	0.0730731	0.000555556	18	6	0.10913	5.0637	5.0656	5.16233	5.31142	5.23402	5.05793	5.04805	4.99797	5.1692	5.20144
CG7781	0.0730731	0.000555556	18	12	0.107397	5.66733	5.74939	5.6716	5.82202	5.8621	5.88096	5.91216	5.96985	5.6206	5.65546
ine	0.0730731	0.000555556	18	12	0.100679	4.70609	4.79	4.77282	4.84537	4.85677	5.00016	4.96683	4.86545	4.60737	4.65475
Gs1	0.0730731	0.000555556	18	3	0.100161	6.1425	6.06339	6.18421	6.02083	6.0444	5.8724	6.00766	5.92141	6.34237	6.26492
CG1041	0.0730731	0.000555556	24	12	0.0944815	4.64881	4.63783	4.63081	4.71736	4.74031	4.81963	4.85077	4.94509	4.71004	4.70357
CG16953	0.0730731	0.000555556	24	9	0.0943874	6.61803	6.58756	6.62848	6.78099	6.77841	6.66717	6.649	6.67452	6.50991	6.57742
CG7357	0.0730731	0.000555556	18	6	0.0925292	3.62124	3.68434	3.67621	3.76502	3.82961	3.59933	3.58832	3.57425	3.6876	3.71474
CG31145	0.0730731	0.000555556	24	15	0.0809616	5.2213	5.22936	5.17054	5.27443	5.28089	5.39539	5.34564	5.38329	5.32671	5.32917
CG18213	0.0730731	0.000555556	18	6	0.0794498	1.67392	1.66316	1.6893	1.71774	1.81017	1.5476	1.6003	1.58944	1.69409	1.69688
Nup98-96	0.0730731	0.000555556	18	6	0.0786029	4.02134	4.08442	4.05934	4.16583	4.1683	3.99909	3.97752	3.98597	4.16438	4.14126
CG5073	0.0730731	0.000555556	18	3	0.0690663	5.66475	5.64715	5.71009	5.61625	5.6351	5.58466	5.54914	5.49619	5.74978	5.77862
CG5316	0.0730731	0.000555556	18	6	0.0689496	4.26334	4.23084	4.25358	4.42046	4.4164	4.22901	4.19249	4.19233	4.3175	4.36587
Ggamma1	0.0730731	0.000555556	24	6	0.0657305	7.57671	7.61088	7.56163	7.65899	7.63496	7.51792	7.52679	7.52451	7.48202	7.5096
CG13506	0.0730731	0.000555556	24	6	0.0656966	7.32453	7.33212	7.29985	7.37095	7.34649	7.27804	7.25564	7.2491	7.19761	7.22222
RhoGAP18B	0.0730731	0.000555556	18	3	0.0493334	3.84527	3.81534	3.82678	3.8112	3.79986	3.74584	3.75579	3.74117	3.90947	4.04577
CG8043	0.0730731	0.000555556	18	12	0.0474571	5.44443	5.44493	5.45112	5.45741	5.48604	5.54941	5.49635	5.55843	5.36313	5.26027
drosha	0.0730731	0.000555556	18	6	0.0225783	3.05007	3.05311	3.0431	3.1356	3.18646	3.02519	3.03901	3.03466	3.10244	3.09359
CG34180	0.110484	0.00222222	24	0	1.19961	6.2955	6.23045	6.17943	4.53395	4.31852	3.22687	3.13252	3.263	4.35897	4.58521
CG3739	0.110484	0.00222222	24	21	0.973463	6.82225	7.57997	7.82339	5.52631	6.21956	6.44671	7.06101	6.42125	8.12634	7.83408
CG11407	0.110484	0.00222222	24	3	0.950012	6.04336	6.01248	5.38287	5.71962	5.12871	4.22997	4.02387	4.13703	4.5558	4.70405
Pdh	0.110484	0.00222222	24	0	0.808024	2.91069	3.32225	3.04823	1.58906	1.31613	1.19147	1.09014	1.05658	1.6615	1.39434
Nplp3	0.110484	0.00222222	18	0	0.807849	7.81757	7.71816	7.49964	6.55355	6.05981	6.59544	6.51604	6.72449	7.06923	7.23611
CG14528	0.110484	0.00222222	24	0	0.702043	5.87246	5.67294	5.76139	4.72047	4.76855	4.5303	4.63928	4.73145	5.57242	5.47815
CG7227	0.110484	0.00222222	24	12	0.652355	1.68922	1.9751	2.01917	2.47162	2.94935	3.17251	2.94174	3.10891	2.45401	2.43727
CG42566	0.110484	0.00222222	18	6	0.573915	2.56103	2.04442	1.97755	3.19222	2.80852	1.97572	1.73003	1.74937	2.49533	2.62508
CG6839	0.110484	0.00222222	24	12	0.561427	6.86487	6.6755	6.67404	7.56671	7.52029	7.73264	7.57203	7.63394	6.8252	7.10113
CG11453	0.110484	0.00222222	24	3	0.557739	3.17898	3.42631	3.15335	3.15164	2.98804	2.52174	2.36288	2.14047	2.38339	2.52873
Clk	0.110484	0.00222222	24	6	0.545031	3.50925	3.59005	3.52094	3.58893	3.59371	2.87466	2.81814	2.87414	2.40338	2.35069
Fmo-2	0.110484	0.00222222	24	0	0.530414	5.71869	5.93123	6.06266	5.20945	4.99932	4.75844	5.00269	4.8138	5.58368	5.39296
Listericin	0.110484	0.00222222	24	21	0.490046	7.70008	7.97624	8.17011	7.21116	6.99953	7.48634	7.61764	7.86478	8.48951	8.28164
Mipp1	0.110484	0.00222222	24	21	0.479802	6.74174	7.05053	6.98703	6.32573	6.24899	6.30849	6.48298	6.41497	7.35514	7.06705
mdy	0.110484	0.00222222	24	0	0.464278	5.06822	4.9525	5.12052	4.66129	4.47843	3.92351	4.17055	4.1012	4.87214	4.50675
CG12268	0.110484	0.00222222	24	0	0.423504	3.55453	3.58905	3.75051	3.31098	3.19286	2.62717	2.9556	2.81123	3.55971	3.32496
CG3819	0.110484	0.00222222	24	12	0.422531	8.15195	7.74039	8.14804	8.75341	8.53227	8.91393	8.67253	8.79418	8.19141	8.35926
CG40198	0.110484	0.00222222	24	0	0.417776	3.84529	3.91273	4.04177	3.26464	3.39419	3.14347	3.3219	3.1666	3.63841	3.76698
CG7409	0.110484	0.00222222	24	3	0.410098	9.84708	9.75219	9.70605	9.5621	9.23163	9.07014	9.12608	9.02442	9.12486	9.14496
CG5991	0.110484	0.00222222	18	12	0.406727	5.51652	5.63994	5.62886	5.87431	6.01752	6.41262	6.19955	6.281	5.2248	5.55566
CG9451	0.110484	0.00222222	24	6	0.390122	5.95377	5.65705	5.88097	5.98521	5.9684	5.23606	5.61037	5.58253	5.05514	5.40205
Hdc	0.110484	0.00222222	18	6	0.388481	2.54058	2.29443	2.19873	3.27038	2.82382	2.14759	1.84133	2.18159	2.37655	2.81553
CG33296	0.110484	0.00222222	24	9	0.363134	2.96904	3.07897	3.19092	3.55203	3.62884	3.54448	3.36645	3.48259	2.55069	2.99592
CG7510	0.110484	0.00222222	24	3	0.35786	5.75215	5.73074	5.63994	5.52052	5.43508	5.03535	5.13385	5.07042	5.22776	5.1194
CG5508	0.110484	0.00222222	24	0	0.335106	6.47538	6.42934	6.45323	5.99403	5.88424	5.81362	5.9333	5.88178	6.21159	6.14607
CG16820	0.110484	0.00222222	18	12	0.328506	3.24007	3.0578	3.16129	3.58675	3.65981	3.84065	3.64332	3.77084	2.51321	2.9857
CG16704	0.110484	0.00222222	24	15	0.318246	4.26368	4.35468	4.52936	4.71068	4.7421	5.15904	5.21814	4.95183	4.71375	4.91638
Tsp42Ep	0.110484	0.00222222	24	12	0.316274	1.77878	1.82003	1.83413	2.00902	2.17337	2.42758	2.33349	2.60753	1.90031	2.0742
kappaTry	0.110484	0.00222222	24	3	0.312853	5.61727	5.78882	5.81084	5.33947	5.3684	5.21269	5.10544	4.909	5.3397	5.25226
Fuca	0.110484	0.00222222	24	9	0.308604	3.63228	3.54234	3.77462	4.16687	4.06871	3.8551	4.01991	3.88926	3.13833	3.5812
Nep5	0.110484	0.00222222	18	0	0.295496	2.15832	2.15965	2.04412	1.71558	1.6092	1.66879	1.77468	1.73847	2.03806	2.02076
CG43341	0.110484	0.00222222	24	3	0.294923	2.97152	2.97398	2.93706	2.7026	2.5732	2.21527	2.21751	2.35091	2.55667	2.58106
nimC1	0.110484	0.00222222	24	9	0.286431	4.33826	4.19542	4.09186	4.49693	4.73782	4.47656	4.36737	4.51725	3.50256	4.01576
CG42846	0.110484	0.00222222	18	12	0.285396	5.95992	6.06393	6.14518	6.2279	6.40842	6.46954	6.54812	6.56613	5.89258	5.96099
CG1600	0.110484	0.00222222	18	0	0.282141	6.41191	6.17329	6.25581	5.57479	5.94718	5.70188	6.04088	6.00902	6.06102	6.04661
CG42708	0.110484	0.00222222	18	9	0.27983	4.7894	4.57645	4.36447	5.74302	5.08892	4.81245	4.86609	4.91995	4.81267	4.79361
bnb	0.110484	0.00222222	24	15	0.276009	5.46835	5.61111	5.53024	5.57398	5.75817	6.00287	6.00166	5.97085	5.79981	5.92057
CG16700	0.110484	0.00222222	24	12	0.268597	5.66344	5.7203	5.72618	5.90029	6.07017	6.31519	6.25192	6.28927	5.93534	5.88444
CG42269	0.110484	0.00222222	18	0	0.240257	1.71426	1.88204	1.75879	1.42771	1.34778	1.51184	1.43106	1.37709	1.53727	1.65311
GstE2	0.110484	0.00222222	24	6	0.236169	3.64122	3.54788	3.68848	3.75983	3.87127	3.56498	3.35449	3.52754	2.99946	3.21919
scu	0.110484	0.00222222	24	21	0.225945	6.77402	6.84212	6.81115	6.46911	6.42552	6.55194	6.54253	6.57193	6.83948	6.93391
pyr	0.110484	0.00222222	24	6	0.218322	3.26022	3.21361	3.3013	3.28792	3.33587	2.99255	2.99345	3.02799	2.83307	2.94633
Tps1	0.110484	0.00222222	18	3	0.211377	8.64867	8.61974	8.88347	8.53134	8.58354	8.26302	8.3195	8.37203	8.86838	8.96093
CG16756	0.110484	0.00222222	18	12	0.207845	6.51878	6.63433	6.49361	6.54434	6.68308	6.80847	6.95284	6.86285	6.34115	6.37982
Acsl	0.110484	0.00222222	18	0	0.201967	7.09639	7.2553	7.14797	6.85486	6.79644	6.81826	6.88294	6.94034	7.06269	7.07055
CG10208	0.110484	0.00222222	24	0	0.200188	4.20188	4.05172	4.24789	3.94068	3.9431	3.7284	3.80809	3.80042	3.9773	4.13438
Cht7	0.110484	0.00222222	24	18	0.200038	2.08644	2.26441	2.07897	1.78252	1.7476	2.27419	2.14524	2.29293	2.37889	2.36187
Cks85A	0.110484	0.00222222	24	12	0.195217	5.75337	5.80534	5.70677	5.94459	5.92672	6.17275	6.30215	6.21489	5.89992	5.93881
CG42370	0.110484	0.00222222	24	12	0.19462	4.46622	4.12205	4.21405	4.72624	4.65937	4.7573	4.66086	4.79308	4.51863	4.51788
CG12001	0.110484	0.00222222	18	3	0.194553	4.90447	4.85636	4.86031	4.72005	4.55629	4.49754	4.41122	4.62284	4.98153	4.90618
CG8550	0.110484	0.00222222	24	12	0.193853	3.38863	3.21988	3.29546	3.47061	3.6063	3.63545	3.77611	3.84676	3.57261	3.42905
ea	0.110484	0.00222222	24	15	0.193675	3.49162	3.52258	3.50897	3.77159	3.69465	3.94576	3.97582	3.9357	3.73644	3.79648
CG14662	0.110484	0.00222222	24	12	0.191857	1.58918	1.64015	1.43648	1.91147	1.72661	1.84169	2.03364	1.95037	1.70333	1.68333
Pli	0.110484	0.00222222	24	12	0.180486	4.34042	4.49563	4.48972	4.62068	4.73655	4.79462	4.75088	4.9287	4.6696	4.57875
CG15629	0.110484	0.00222222	18	12	0.178484	4.28221	4.27528	4.46057	4.50476	4.5854	4.69458	4.58476	4.7552	3.85211	4.26599
CG7378	0.110484	0.00222222	24	15	0.17774	8.70267	8.78149	8.79319	8.90563	9.02385	9.157	9.12971	9.10376	8.9278	9.06477
Exn	0.110484	0.00222222	18	3	0.169433	4.09635	4.14064	4.24197	4.01655	4.01313	3.82118	3.95811	3.7141	4.48297	4.22359
CG15556	0.110484	0.00222222	24	9	0.168785	3.76844	3.89866	3.82886	4.0444	4.10872	3.99306	4.0009	4.03031	3.64502	3.77805
CG5527	0.110484	0.00222222	24	18	0.163862	3.58814	3.68139	3.68392	3.54538	3.61043	3.81674	3.85134	3.75876	3.9122	3.92556
Myo31DF	0.110484	0.00222222	18	6	0.163497	4.94003	4.96741	4.98867	5.05337	5.2416	4.68762	4.91503	4.73237	5.01821	5.11669
Nurf-38	0.110484	0.00222222	24	3	0.162929	7.40215	7.48358	7.5031	7.20629	7.23638	7.06099	7.11951	7.05583	7.18688	7.22307
SP1029	0.110484	0.00222222	18	12	0.159129	3.32363	3.35414	3.37332	3.41464	3.53018	3.62936	3.63939	3.57947	3.24709	3.34944
Sodh-1	0.110484	0.00222222	18	15	0.158366	7.6809	7.6596	7.62583	7.52426	7.44628	7.93589	8.06169	8.00015	7.51779	7.5401
CG14642	0.110484	0.00222222	24	12	0.15722	1.60656	1.55826	1.66926	1.75993	1.86747	1.7806	2.0267	1.95833	1.68954	1.73481
CG13607	0.110484	0.00222222	18	12	0.156819	5.88581	5.80848	5.92907	5.89153	5.98219	6.18807	6.02857	6.24951	5.43027	5.58115
Pdi	0.110484	0.00222222	24	12	0.154712	7.49495	7.46619	7.49365	7.65061	7.75103	7.71374	7.89948	7.80236	7.64689	7.64102
CG7408	0.110484	0.00222222	18	9	0.15382	3.07329	3.09009	3.0895	3.42916	3.38931	3.2394	3.12035	3.2482	3.15595	3.09053
CG7777	0.110484	0.00222222	24	9	0.149613	4.57841	4.56782	4.61464	4.84368	4.76301	4.75634	4.77887	4.72325	4.30003	4.50461
ppk10	0.110484	0.00222222	18	6	0.146888	1.50781	1.46039	1.38273	1.96379	1.60032	1.37736	1.23585	1.31263	1.51693	1.88947
CG9394	0.110484	0.00222222	24	15	0.144695	4.82728	4.73268	4.84495	4.89641	4.94082	5.16645	5.0923	5.03191	5.0483	5.01543
CG9706	0.110484	0.00222222	18	9	0.139456	3.62451	3.61848	3.72369	3.82223	3.96665	3.78716	3.91759	3.82123	3.73754	3.75917
LanB1	0.110484	0.00222222	18	12	0.138742	3.43625	3.50104	3.51903	3.59841	3.68166	3.71355	3.91457	3.70765	3.29811	3.46875
CG33514	0.110484	0.00222222	24	21	0.138463	3.08936	3.17784	3.19755	3.00173	2.97794	3.15784	3.06508	3.06511	3.63345	3.46863
mRpL48	0.110484	0.00222222	24	18	0.137993	4.11724	4.11108	4.04887	3.95353	4.02559	4.30623	4.17325	4.12421	4.30182	4.39088
CG30344	0.110484	0.00222222	18	9	0.135357	4.41298	4.39805	4.45158	4.61988	4.73012	4.58269	4.61023	4.58425	4.42386	4.55031
CG8170	0.110484	0.00222222	24	3	0.132788	1.47732	1.4382	1.38555	1.10319	1.08846	1.0093	1.01685	1.01857	1.07696	1.09264
Reg-2	0.110484	0.00222222	24	18	0.132351	5.19957	5.29722	5.28899	5.21585	5.14752	5.38789	5.41242	5.33469	5.47367	5.48072
dmt	0.110484	0.00222222	18	9	0.132145	3.45276	3.43794	3.449	3.75775	3.7689	3.6125	3.60851	3.55456	3.54243	3.56561
Ppn	0.110484	0.00222222	18	12	0.128672	6.02886	6.00953	5.94875	6.06399	6.20565	6.19568	6.28777	6.20944	5.41167	5.72057
CG12947	0.110484	0.00222222	24	21	0.127274	1.71714	1.78125	1.73328	1.51438	1.56397	1.71947	1.69316	1.68786	1.89947	1.89305
18w	0.110484	0.00222222	18	15	0.126284	4.34351	4.27393	4.22471	4.11749	4.09924	4.37933	4.37027	4.4201	4.25453	4.15582
rump	0.110484	0.00222222	18	9	0.12499	5.01195	5.04875	5.04715	5.25469	5.24387	5.21886	5.18234	5.12597	5.11679	5.14595
Cont	0.110484	0.00222222	18	9	0.121114	5.17769	5.10889	5.10219	5.4301	5.33293	5.24278	5.2994	5.22387	5.18841	5.23951
TrxT	0.110484	0.00222222	24	18	0.119954	1.20845	1.23305	1.22815	1.17652	1.19365	1.39807	1.31101	1.33519	1.41591	1.39779
CG7139	0.110484	0.00222222	24	6	0.119744	4.28447	4.25749	4.22349	4.35862	4.35058	4.18124	4.11399	4.14138	4.05993	4.12653
CG9497	0.110484	0.00222222	18	12	0.118966	4.56041	4.60005	4.63531	4.67348	4.71105	4.91376	4.67389	4.9591	4.15361	4.28496
CG18249	0.110484	0.00222222	24	12	0.118757	3.7116	3.51059	3.67035	3.78526	3.85359	3.8383	4.02895	3.90151	3.77967	3.76917
Hf	0.110484	0.00222222	24	9	0.118337	6.59971	6.65979	6.70959	6.8392	6.78501	6.75909	6.73329	6.78021	6.45442	6.60163
Klp98A	0.110484	0.00222222	24	6	0.115272	4.24848	4.30382	4.18936	4.3716	4.30653	4.20858	4.09285	4.15152	4.07204	4.04931
CG30185	0.110484	0.00222222	24	21	0.114058	4.53527	4.45462	4.46766	4.29087	4.39722	4.40666	4.44213	4.34621	4.5681	4.69047
CG10702	0.110484	0.00222222	24	3	0.112083	3.25317	3.19883	3.17784	3.12301	3.12399	2.95095	2.97298	3.04141	3.04032	3.05256
Fur2	0.110484	0.00222222	24	3	0.110658	4.33172	4.3335	4.35986	4.28158	4.21899	4.11327	4.10763	4.1361	4.22686	4.1896
Ac76E	0.110484	0.00222222	18	12	0.109053	5.22011	5.36021	5.4102	5.44048	5.5213	5.5822	5.52868	5.55018	5.27198	5.06892
CG1632	0.110484	0.00222222	24	15	0.108409	1.49519	1.48382	1.44983	1.63063	1.59823	1.70379	1.76841	1.73768	1.62948	1.63713
CG3764	0.110484	0.00222222	24	0	0.107453	3.82212	3.84877	3.87266	3.68014	3.74385	3.56785	3.60086	3.64154	3.74552	3.69849
CG14995	0.110484	0.00222222	24	6	0.106757	5.10055	5.1227	5.04848	5.23205	5.19102	5.08107	5.04051	4.99513	4.89371	4.90952
CG5087	0.110484	0.00222222	18	9	0.106178	4.45135	4.55031	4.46934	4.6631	4.70177	4.62703	4.5956	4.62579	4.55665	4.60503
CG6293	0.110484	0.00222222	18	12	0.103839	6.22801	6.16725	6.11796	6.27177	6.19265	6.32306	6.33054	6.40137	5.988	5.97597
CG13868	0.110484	0.00222222	18	3	0.101361	8.40691	8.40125	8.67482	8.39144	8.35516	8.25023	8.24691	8.27764	8.76903	8.62186
CG16940	0.110484	0.00222222	18	9	0.0990172	3.95039	4.03519	3.97886	4.20938	4.19217	4.09161	4.09884	4.04845	4.04077	4.03205
Buffy	0.110484	0.00222222	18	12	0.0988634	3.87995	3.91475	3.87437	3.99051	3.98421	4.0151	4.12311	4.11535	3.81957	3.87812
Mfe2	0.110484	0.00222222	24	18	0.0979604	6.00653	6.0662	5.9972	5.96859	5.96837	6.05326	6.14507	6.09096	6.21813	6.18069
CG17737	0.110484	0.00222222	18	9	0.0951239	7.37311	7.37998	7.41252	7.58443	7.60552	7.50453	7.49127	7.51761	7.4486	7.49952
Ptpmeg	0.110484	0.00222222	18	3	0.0931684	4.59136	4.65907	4.6648	4.56835	4.53382	4.4406	4.4572	4.49393	4.80834	4.66233
Ugt86Dh	0.110484	0.00222222	18	3	0.0924061	2.75997	2.86599	2.75673	2.62929	2.75657	2.52454	2.66608	2.60048	2.8734	3.18424
Amph	0.110484	0.00222222	24	3	0.0909148	7.4385	7.39279	7.35351	7.26711	7.32887	7.16317	7.25829	7.20029	7.2592	7.26787
CG9801	0.110484	0.00222222	18	6	0.087922	3.33886	3.40216	3.34659	3.60481	3.46706	3.3285	3.30511	3.22609	3.412	3.39722
CG9542	0.110484	0.00222222	18	12	0.0873401	4.0794	4.00748	4.1235	4.15943	4.13123	4.2351	4.2602	4.19746	3.76312	4.07638
MSBP	0.110484	0.00222222	18	6	0.0873355	7.52874	7.50921	7.45099	7.6306	7.67734	7.37047	7.50497	7.44893	7.56683	7.56329
CG11306	0.110484	0.00222222	18	9	0.0862932	4.94436	4.96987	4.99526	5.11017	5.18707	5.07389	5.09687	5.03423	5.02942	5.06886
moody	0.110484	0.00222222	18	6	0.0854171	4.07106	4.09576	4.12493	4.26298	4.22296	4.07278	4.02505	4.00413	4.15242	4.18824
CG5315	0.110484	0.00222222	18	12	0.0829691	7.75231	7.86205	7.82075	7.88285	7.86339	7.98006	7.93971	7.96178	7.77131	7.73963
Lgr1	0.110484	0.00222222	18	12	0.0824158	2.19405	2.2779	2.23541	2.32778	2.28094	2.4175	2.39597	2.34421	2.17912	2.22338
sec63	0.110484	0.00222222	24	15	0.0823539	5.40658	5.3803	5.39109	5.43692	5.49988	5.54103	5.58808	5.54026	5.49676	5.53991
CG33993	0.110484	0.00222222	18	9	0.0783094	1.2213	1.23387	1.18643	1.34584	1.34431	1.28209	1.33296	1.31	1.24703	1.30145
XNP	0.110484	0.00222222	18	9	0.0766408	4.89324	4.87512	4.93203	5.04867	5.00279	5.00045	5.01807	4.98656	4.95169	4.93737
CG9986	0.110484	0.00222222	24	9	0.0762728	2.54018	2.50118	2.48567	2.59732	2.66664	2.61807	2.55228	2.57693	2.48382	2.47664
Side	0.110484	0.00222222	24	0	0.0749059	1.89833	1.87841	1.89221	1.7924	1.8037	1.72229	1.79596	1.73181	1.85871	1.83817
CG42258	0.110484	0.00222222	24	3	0.0707807	5.68157	5.67718	5.63792	5.66652	5.63226	5.56203	5.49282	5.51124	5.62788	5.62152
sec15	0.110484	0.00222222	18	9	0.0707075	3.57904	3.4355	3.55567	3.68536	3.69592	3.64935	3.615	3.63836	3.59893	3.61863
cnn	0.110484	0.00222222	18	9	0.0700785	4.6333	4.66712	4.70062	4.89553	4.78596	4.76619	4.73244	4.75836	4.73079	4.74575
lack	0.110484	0.00222222	18	9	0.0693392	4.49538	4.49923	4.50858	4.63441	4.63308	4.59483	4.5633	4.59457	4.58414	4.51785
CG3164	0.110484	0.00222222	24	9	0.0670047	8.05426	8.03109	8.05051	8.22418	8.10602	8.05548	8.09888	8.13921	7.93192	8.00412
CG5532	0.110484	0.00222222	24	18	0.0669489	6.1594	6.09989	6.11496	6.09113	6.09768	6.14792	6.19209	6.15978	6.26614	6.29175
CG7692	0.110484	0.00222222	18	6	0.0630152	2.73746	2.78344	2.74589	2.92321	2.89426	2.69432	2.71862	2.71784	2.84114	2.77178
CG7985	0.110484	0.00222222	24	18	0.0595129	2.59146	2.5516	2.58901	2.51273	2.50579	2.60346	2.65771	2.59859	2.66292	2.63576
Maf1	0.110484	0.00222222	24	9	0.0583603	4.97121	4.95817	4.94126	5.10949	5.0446	4.97185	4.97456	5.04206	4.88932	4.95547
CG8908	0.110484	0.00222222	18	3	0.0566601	1.84068	1.87572	1.88073	1.81718	1.83754	1.67334	1.83244	1.65798	1.91041	1.90089
Pcf11	0.110484	0.00222222	18	9	0.0566583	4.99235	4.99646	4.97028	5.1357	5.06682	5.08502	5.01333	5.04902	5.01163	5.00282
ec	0.110484	0.00222222	18	15	0.0400028	1.89909	1.95614	1.9032	1.86917	1.87475	2.0275	1.92133	1.9941	1.87495	1.87506
CG42329	0.164215	0.00722222	24	3	1.31293	3.83006	4.28141	3.79758	3.32545	3.37321	1.94081	1.64643	1.89385	1.74208	2.12195
CG4734	0.164215	0.00722222	18	12	0.973198	3.57056	3.32014	2.45527	3.72797	4.21071	4.6807	4.79508	5.20731	2.97438	2.73103
CG13965	0.164215	0.00722222	24	3	0.770544	4.09851	4.36063	4.43259	3.6971	4.1201	2.90981	3.15216	3.03039	3.07328	3.26274
CG9363	0.164215	0.00722222	24	3	0.758846	4.95107	4.91954	4.94716	4.84807	4.57933	3.7749	3.89528	3.71729	3.77372	3.99274
CG17127	0.164215	0.00722222	24	0	0.676563	4.17838	4.19155	3.93236	2.87204	2.47995	2.38326	2.36465	2.52634	2.56634	2.90054
per	0.164215	0.00722222	24	18	0.662799	2.62497	2.79956	2.79276	2.64052	2.6733	3.53777	3.5555	3.58999	3.99795	4.02998
CG7296	0.164215	0.00722222	24	15	0.655617	3.8791	4.31057	4.35383	4.57854	4.19824	5.26158	5.34662	5.48043	5.12542	4.77952
CG16772	0.164215	0.00722222	24	3	0.587824	9.01537	9.02883	9.18997	8.47358	7.97052	7.64227	7.70524	7.94026	8.08307	8.21473
CG13833	0.164215	0.00722222	24	3	0.570062	6.54991	6.29643	5.91265	6.08376	5.34607	5.13633	4.8891	5.22626	5.30812	5.83244
ppk23	0.164215	0.00722222	18	6	0.533139	2.53005	2.05249	1.86108	3.27684	2.81364	1.92838	1.50301	1.85594	2.36993	2.79791
CG7079	0.164215	0.00722222	24	3	0.531177	5.46753	5.52806	5.38521	5.23953	4.97448	4.63401	4.52699	4.60698	4.59088	4.71954
CG32984	0.164215	0.00722222	24	3	0.518153	4.11562	3.71941	3.87766	3.15415	3.40184	2.98663	2.85336	2.78043	3.32877	2.93657
CAH2	0.164215	0.00722222	24	3	0.489826	6.84478	7.02624	6.73391	6.86019	6.60003	6.02781	6.07885	5.94411	6.16748	6.54806
gk	0.164215	0.00722222	24	3	0.438327	3.82684	3.85552	3.52432	3.60766	3.55848	2.79925	2.92475	2.90444	3.36805	3.3534
CG11951	0.164215	0.00722222	24	6	0.423805	4.42849	4.12357	4.27786	4.45755	4.15666	3.86223	3.80701	3.90681	3.21424	3.30461
CG10253	0.164215	0.00722222	24	0	0.416423	5.04357	5.0346	5.01883	4.40449	4.43549	4.42992	4.35169	4.43239	4.7175	4.9808
Indy	0.164215	0.00722222	24	0	0.401597	6.46468	6.55221	6.62063	6.06661	6.05268	5.82826	6.02124	5.81637	6.56487	6.43253
CG34454	0.164215	0.00722222	24	12	0.362493	4.35067	4.34621	4.32045	4.70156	4.53383	4.86332	5.12154	5.05385	4.33333	4.43824
CG10131	0.164215	0.00722222	18	12	0.358239	4.3921	4.15375	4.08263	4.43552	4.506	4.7657	4.9889	4.85053	4.02474	4.19749
CG10433	0.164215	0.00722222	24	0	0.34523	9.01113	8.97389	9.08669	8.59655	8.71898	8.18622	8.3074	8.19003	8.57063	8.75839
GstE9	0.164215	0.00722222	24	3	0.344373	7.9065	7.8155	7.82858	7.67736	7.54065	7.05363	7.32628	7.2074	7.58047	7.32153
CG13012	0.164215	0.00722222	24	3	0.33402	6.20234	6.43367	6.46808	6.26873	6.1182	5.38751	5.79799	5.86601	5.82799	5.88322
Acer	0.164215	0.00722222	18	9	0.327837	5.62198	5.50064	5.71177	6.02524	6.24953	6.01553	6.16035	6.10078	5.8565	5.89488
Jon65Aiii	0.164215	0.00722222	18	12	0.32691	10.2357	10.4132	10.0951	10.5314	10.1765	10.7651	10.6559	10.7729	9.91651	9.69849
CG9886	0.164215	0.00722222	24	0	0.325252	4.43086	4.47235	4.48899	3.98848	4.08672	4.00472	3.97089	3.96182	4.41572	4.44034
CG10175	0.164215	0.00722222	18	6	0.313876	2.63199	2.50842	2.37471	3.29803	2.76331	2.23081	2.04932	2.25376	2.4695	2.75479
CG13215	0.164215	0.00722222	24	18	0.313583	1.74292	1.67094	1.54452	1.57991	1.58588	1.82326	2.11441	1.96613	2.14432	2.37779
CG9498	0.164215	0.00722222	24	12	0.309754	6.18182	6.35318	6.70557	6.79123	6.94892	6.97205	7.26174	7.13165	6.60231	6.94357
CR43611	0.164215	0.00722222	24	3	0.305796	3.97725	4.06105	3.74473	3.69506	3.8289	3.15432	3.54214	3.13495	3.57892	3.74307
rost	0.164215	0.00722222	24	0	0.301788	4.47644	4.52096	4.49747	3.97785	4.17494	3.94522	4.07067	3.99133	4.41432	4.33815
NLaz	0.164215	0.00722222	24	3	0.29121	8.43016	8.54218	8.66169	8.30336	8.38181	8.23344	7.89153	7.92215	8.14786	8.03928
Ahcy89E	0.164215	0.00722222	24	12	0.282509	3.48609	3.60484	3.75584	3.95853	3.86044	4.20453	4.24938	4.18196	3.72085	3.88562
CG7912	0.164215	0.00722222	24	9	0.280983	1.56727	1.88465	1.93004	2.04759	2.3008	2.16979	1.88655	1.94371	1.49109	1.44886
CG8630	0.164215	0.00722222	24	15	0.280355	3.63103	3.62979	3.64594	3.71646	3.74329	4.14577	4.1738	4.3141	3.84418	3.67889
CG10026	0.164215	0.00722222	24	12	0.274661	3.86813	3.94775	4.18188	4.35726	4.3451	4.35845	4.41007	4.47079	3.97002	4.04813
tnc	0.164215	0.00722222	24	3	0.270706	3.52768	3.55416	3.52287	3.21575	3.16157	2.83291	2.93421	3.15582	3.09848	3.03714
ana	0.164215	0.00722222	24	15	0.266846	2.3672	2.51408	2.48458	2.38134	2.63223	3.02866	2.93853	2.95293	2.72139	2.68298
CG32698	0.164215	0.00722222	24	12	0.259853	4.48245	4.32193	4.40788	4.64296	4.77236	4.88756	4.78756	4.89221	4.43441	4.42222
Ance	0.164215	0.00722222	24	0	0.253329	6.75659	6.92788	6.92975	6.39942	6.41399	6.35871	6.51759	6.34098	6.60379	6.55176
CG4950	0.164215	0.00722222	18	12	0.250311	4.25063	4.20422	4.24719	4.58298	4.6155	4.60744	4.61085	4.6707	3.65219	4.04164
CG30431	0.164215	0.00722222	18	12	0.246986	4.73434	4.65948	4.78884	4.69809	4.87376	5.09408	5.03692	5.25169	4.44809	4.54199
SamDC	0.164215	0.00722222	18	12	0.245853	5.29605	5.17026	5.13991	5.42875	5.4772	5.65979	5.60962	5.75501	5.06187	5.27988
LpR1	0.164215	0.00722222	18	3	0.245691	5.00341	4.77717	4.87384	4.90415	4.7666	4.18079	4.6786	4.39649	5.37215	5.06131
CG5758	0.164215	0.00722222	18	12	0.244983	5.89391	5.96068	5.89995	6.24706	6.1267	6.33733	6.27694	6.36004	5.92001	5.86499
CG8952	0.164215	0.00722222	24	12	0.243617	5.97525	6.28183	6.19433	6.3658	6.62636	6.70946	6.55171	6.63785	6.29723	6.4265
CG42526	0.164215	0.00722222	18	9	0.240246	2.25909	2.24869	2.15972	2.62091	2.61137	2.58428	2.37661	2.54787	2.41354	2.39183
DmsR-1	0.164215	0.00722222	24	18	0.238788	3.45456	3.29091	3.32264	3.16068	3.03665	3.66034	3.56377	3.49376	3.91702	3.55615
Cyp305a1	0.164215	0.00722222	24	6	0.237455	5.29983	5.1782	5.32545	5.37436	5.20115	5.16787	4.96402	5.09808	4.32929	4.46461
CG4408	0.164215	0.00722222	18	12	0.237035	4.54139	4.33992	4.38982	4.39133	4.53894	4.75276	4.73782	4.73344	4.12911	4.05517
CG10200	0.164215	0.00722222	24	9	0.235006	5.07536	5.00083	5.23661	5.40771	5.48797	5.12076	5.20348	5.35205	4.65245	4.9979
modSP	0.164215	0.00722222	24	3	0.234749	5.92254	5.77597	5.84478	5.52673	5.45785	5.35159	5.36988	5.3158	5.36837	5.51196
CG5162	0.164215	0.00722222	18	15	0.231388	8.42886	8.4151	8.42908	7.98319	7.93002	8.53008	8.61654	8.60487	7.92658	8.16063
Npc2g	0.164215	0.00722222	24	15	0.230001	8.31343	8.19644	8.27772	8.33913	8.61469	8.62303	8.93996	8.74962	8.55136	8.49803
CG17124	0.164215	0.00722222	18	3	0.226533	6.405	6.17267	6.3392	6.16363	6.12858	5.90922	5.73702	5.99536	6.25277	6.45724
CG10924	0.164215	0.00722222	24	12	0.226491	5.08045	4.98125	5.16794	5.35326	5.37509	5.40286	5.46642	5.54656	5.10094	5.1355
CG6900	0.164215	0.00722222	18	9	0.222885	1.8873	1.73698	1.84138	2.20115	2.20386	2.17545	2.03706	2.06851	1.80008	1.90194
CG10178	0.164215	0.00722222	24	15	0.222391	4.05363	4.17859	4.22209	4.33729	4.33028	4.50742	4.54215	4.75259	4.33646	4.52201
CG42337	0.164215	0.00722222	18	15	0.220389	3.91543	4.04227	3.83907	3.6272	3.5803	4.05175	4.44043	4.10046	3.74603	3.57903
CG6543	0.164215	0.00722222	24	0	0.215195	6.65145	6.68915	6.74037	6.40079	6.32769	6.31289	6.47749	6.31173	6.64955	6.60099
CG4259	0.164215	0.00722222	24	6	0.21385	2.38141	2.59371	2.56137	2.55816	2.80066	2.26756	2.36748	2.3805	2.06481	2.25573
CG9449	0.164215	0.00722222	24	6	0.213669	4.06515	4.03101	3.98432	4.35972	4.21879	3.77842	3.86993	3.83757	3.55054	3.8457
CG10933	0.164215	0.00722222	18	9	0.213535	2.21412	2.21107	2.15682	3.01628	2.5738	2.33514	2.50656	2.29339	2.20167	2.26179
CG9657	0.164215	0.00722222	24	6	0.212803	2.93674	2.94945	2.97383	2.9401	3.00088	2.71476	2.66454	2.65163	2.63915	2.62781
Cyp312a1	0.164215	0.00722222	24	3	0.211592	1.86541	1.83959	1.95483	1.59249	1.58537	1.5021	1.46043	1.2599	1.54035	1.60837
CG10311	0.164215	0.00722222	18	9	0.21026	6.55224	6.62619	6.73	7.00659	7.02279	6.97471	7.01925	7.01604	6.74507	6.96994
CG6465	0.164215	0.00722222	24	21	0.208652	3.91367	4.08645	4.07727	3.84074	3.73951	3.88341	3.78809	3.82598	4.35466	4.24492
B4	0.164215	0.00722222	24	0	0.207529	4.27819	4.18514	4.15127	4.12776	3.93071	3.79585	3.79425	3.77273	4.15927	3.94082
CG9507	0.164215	0.00722222	24	15	0.206312	2.05551	2.02812	2.07417	2.16093	2.21752	2.47947	2.38448	2.50929	2.35675	2.10635
CR43488	0.164215	0.00722222	24	6	0.200908	2.03806	2.12307	2.18298	2.25294	2.229	2.00704	1.94747	1.61383	1.88496	1.84335
Vdup1	0.164215	0.00722222	24	3	0.198993	5.25261	5.15544	5.14004	4.98368	4.98115	4.7745	4.79942	4.74422	4.83742	5.08512
CG14855	0.164215	0.00722222	24	18	0.19747	1.60764	1.74428	1.58219	1.57782	1.71197	1.7843	1.88691	1.83631	2.31932	2.46631
CG4825	0.164215	0.00722222	24	0	0.193809	4.98021	5.08012	5.34716	4.80604	4.96087	4.60216	4.80522	4.71099	4.98184	5.04381
CG42669	0.164215	0.00722222	24	15	0.192986	4.77594	4.85074	4.89522	4.85825	4.9158	5.1974	5.07917	5.22573	5.05174	5.08474
CG32276	0.164215	0.00722222	24	15	0.191909	6.94556	6.97522	6.97219	7.19773	7.29814	7.30891	7.43947	7.36907	7.3591	7.24467
Ir25a	0.164215	0.00722222	18	6	0.190003	1.58964	1.51979	1.41291	1.82207	1.74416	1.44659	1.32928	1.27508	1.54282	1.70184
qsm	0.164215	0.00722222	24	3	0.188882	4.97945	4.92426	4.97448	4.94441	4.85671	4.61696	4.60844	4.67729	4.70856	4.88383
CG33120	0.164215	0.00722222	24	9	0.187443	4.56071	4.56403	4.61766	4.79391	4.86868	4.78216	4.83582	4.82579	4.53602	4.50569
CG42514	0.164215	0.00722222	18	0	0.18718	3.48065	3.58927	3.55633	3.27654	3.10338	3.28205	3.37673	3.30118	3.53378	3.35631
eater	0.164215	0.00722222	24	9	0.185893	2.10541	2.21143	2.23158	2.38657	2.42396	2.34129	2.46364	2.23339	1.68254	2.01145
dnd	0.164215	0.00722222	24	3	0.17726	3.26751	3.24865	3.39828	3.21882	3.16852	2.8558	2.88766	3.11491	2.96813	3.19823
CG15343	0.164215	0.00722222	24	15	0.175807	4.22809	4.1674	4.06622	4.41547	4.46308	4.5197	4.55643	4.50844	4.33468	4.47908
snoRNA:Psi18S-1275	0.164215	0.00722222	18	3	0.175782	1.84066	1.84228	1.74672	1.66196	1.601	1.505	1.52124	1.34482	1.78343	1.96291
olf186-M	0.164215	0.00722222	18	6	0.17438	3.71649	3.8752	3.88948	3.99871	4.15624	3.61553	3.78012	3.68222	4.00907	3.96094
cue	0.164215	0.00722222	18	3	0.174257	5.50917	5.32586	5.42029	5.19127	5.07567	5.0464	5.07296	5.10155	5.50111	5.5903
Eip63F-2	0.164215	0.00722222	24	3	0.174242	1.70237	1.77637	1.65902	1.73457	1.65361	1.45916	1.43554	1.4072	1.46296	1.59933
Csk	0.164215	0.00722222	24	3	0.172327	5.25354	5.18006	5.23116	5.24095	5.14601	4.98409	4.93425	4.92181	5.04193	4.99724
CG31729	0.164215	0.00722222	18	9	0.171642	5.77329	5.74273	5.72418	6.06703	6.01392	5.79838	5.90512	6.00655	5.89158	5.76358
Droj2	0.164215	0.00722222	18	9	0.170653	8.39173	8.34725	8.37318	8.58337	8.65405	8.63331	8.63283	8.5437	8.52346	8.51875
Dot	0.164215	0.00722222	18	3	0.170065	3.36274	3.54901	3.64424	3.31355	3.4176	3.13627	3.34246	3.12417	3.746	3.69083
Pdk	0.164215	0.00722222	24	0	0.167296	6.38835	6.38648	6.42297	6.18208	6.1195	6.11165	6.13717	6.15176	6.24809	6.35635
CG11400	0.164215	0.00722222	24	3	0.166524	7.26458	7.20118	7.43146	7.25014	7.22361	6.82779	7.01949	6.91724	7.19595	7.14211
CG12014	0.164215	0.00722222	18	6	0.165709	1.84567	1.93168	1.89826	2.19877	2.16235	1.85563	1.86708	1.69253	1.96077	2.02636
CG9628	0.164215	0.00722222	24	9	0.163725	7.55832	7.56991	7.62927	7.86888	7.84342	7.7305	7.80945	7.67997	7.34456	7.59757
CG2076	0.164215	0.00722222	24	12	0.162745	9.21806	9.18089	9.20229	9.44821	9.45365	9.50258	9.34521	9.58301	9.29171	9.33291
CG5002	0.164215	0.00722222	24	12	0.16229	3.561	3.73631	3.87567	4.18507	4.21979	4.19527	4.24248	4.19062	4.10518	4.18332
CG12512	0.164215	0.00722222	18	12	0.161338	5.10662	5.11962	5.37407	5.32744	5.28901	5.55886	5.47072	5.42587	4.62261	4.93045
Hen1	0.164215	0.00722222	24	9	0.160866	2.47008	2.52767	2.5877	2.82689	2.8152	2.59451	2.76113	2.65739	2.50711	2.50569
T3dh	0.164215	0.00722222	18	0	0.159511	3.66762	3.67395	3.68736	3.41548	3.41968	3.44966	3.54941	3.53187	3.52346	3.57487
CG13101	0.164215	0.00722222	18	3	0.156492	3.53994	3.53781	3.32446	3.53564	3.22052	3.10335	3.18026	3.31629	3.6429	3.59046
CG9372	0.164215	0.00722222	24	6	0.154274	6.02594	6.0791	6.10911	6.20494	6.06382	5.8997	5.89305	6.00755	5.58384	5.73779
CG17181	0.164215	0.00722222	24	21	0.153304	5.06679	5.22852	4.95895	4.86151	4.90447	4.93325	4.95701	4.88232	5.14367	5.26958
GstE6	0.164215	0.00722222	18	6	0.149194	6.59995	6.63472	6.60307	6.92016	6.71697	6.44979	6.48555	6.40938	6.91373	6.8726
Cyp9b2	0.164215	0.00722222	24	9	0.14905	6.3897	6.40745	6.58949	6.62823	6.61823	6.4894	6.59499	6.49417	6.03035	6.16526
Alas	0.164215	0.00722222	24	12	0.147819	7.83969	7.73268	7.65321	7.85116	7.87916	8.03221	8.11488	7.95557	7.82453	7.74387
CG11275	0.164215	0.00722222	18	3	0.147115	4.50765	4.36461	4.46792	4.35317	4.34293	4.1707	4.25189	4.10648	4.42084	4.58502
CG9629	0.164215	0.00722222	24	15	0.146686	4.72709	4.58085	4.58106	4.77022	4.72862	4.85295	5.09403	4.89374	4.91637	4.78676
pen-2	0.164215	0.00722222	18	6	0.146323	3.78064	3.89539	3.79429	4.04366	4.00582	3.63623	3.72655	3.77342	3.80367	3.86525
CG9603	0.164215	0.00722222	18	0	0.144495	7.38532	7.39579	7.433	7.13336	7.22927	7.15102	7.27935	7.19678	7.30437	7.37361
scramb2	0.164215	0.00722222	24	12	0.143842	4.86306	4.97169	5.03801	5.18881	5.20219	5.21887	5.19501	5.22312	4.99584	5.12985
Stat92E	0.164215	0.00722222	24	9	0.143014	6.57382	6.52158	6.50269	6.76833	6.7354	6.67562	6.70324	6.72017	6.52671	6.42959
GNBP3	0.164215	0.00722222	18	12	0.142601	5.88744	5.83481	5.96216	5.9253	6.09319	6.10771	6.12334	6.15338	5.74542	5.84349
alc	0.164215	0.00722222	24	0	0.141709	6.60784	6.59533	6.66193	6.44033	6.37383	6.36022	6.35537	6.39493	6.4395	6.54679
Ser7	0.164215	0.00722222	18	12	0.141584	5.77184	5.63487	5.76884	5.9484	5.79338	5.97759	5.99721	5.9652	5.68505	5.74063
hoe1	0.164215	0.00722222	24	6	0.140262	6.08118	6.19702	6.15655	6.1849	6.16637	6.04717	5.98654	6.06942	5.78165	5.86013
Lsd-2	0.164215	0.00722222	24	21	0.139284	7.69968	7.70217	7.70523	7.62983	7.31543	7.47965	7.46533	7.63076	7.75696	7.71518
CG31202	0.164215	0.00722222	18	12	0.138413	3.27226	3.40152	3.31203	3.29533	3.45865	3.66329	3.5376	3.45912	3.17635	3.17901
CG4335	0.164215	0.00722222	18	12	0.138277	5.07803	5.14926	5.13727	5.14648	5.15237	5.33743	5.37914	5.32204	5.1045	4.94626
CG14969	0.164215	0.00722222	18	9	0.136951	4.12355	4.25857	4.16059	4.4523	4.50941	4.34937	4.2891	4.35423	4.25571	4.34346
ImpL2	0.164215	0.00722222	18	15	0.136516	6.0729	6.17006	6.06153	5.96343	5.91086	6.24134	6.25052	6.36701	6.15837	6.03057
KrT95D	0.164215	0.00722222	24	18	0.13504	6.5401	6.64757	6.69964	6.44631	6.52148	6.739	6.71421	6.80915	6.76771	6.77048
CG1311	0.164215	0.00722222	18	6	0.134703	4.68061	4.54958	4.6701	4.81299	4.76882	4.4577	4.529	4.46813	4.55013	4.70611
CG42700	0.164215	0.00722222	24	15	0.134568	4.21532	4.46418	4.37628	4.52307	4.5156	4.8135	4.63821	4.61822	4.60838	4.47197
coil	0.164215	0.00722222	18	6	0.134024	2.87852	2.88782	2.77227	3.07846	3.11155	2.72293	2.84236	2.83224	2.93237	2.93878
Acox57D-p	0.164215	0.00722222	24	21	0.133834	4.4345	4.55918	4.3699	4.26823	4.15139	4.34284	4.40601	4.36203	4.65516	4.49489
Atet	0.164215	0.00722222	18	9	0.13331	3.92272	4.03825	4.08231	4.32463	4.19643	4.22849	4.18204	4.2262	4.14771	4.09891
yellow-f2	0.164215	0.00722222	24	12	0.13272	5.63306	5.71242	5.6792	5.81913	5.77247	5.93611	5.94909	5.98709	5.71785	5.84606
MFS17	0.164215	0.00722222	18	9	0.132092	4.61988	4.58455	4.60945	4.89415	4.90356	4.65932	4.71522	4.76869	4.65603	4.60659
CG12104	0.164215	0.00722222	24	15	0.131057	3.42115	3.5505	3.59077	3.65773	3.70298	3.78787	3.79565	3.77403	3.70691	3.78995
CCHa2	0.164215	0.00722222	18	12	0.130824	6.08535	6.02562	5.97622	6.18713	6.25945	6.36833	6.15048	6.406	5.95178	5.87481
Sulf1	0.164215	0.00722222	18	9	0.128679	3.64374	3.6265	3.58291	3.91957	3.79287	3.74739	3.80696	3.81001	3.73665	3.67827
CG8451	0.164215	0.00722222	18	3	0.128555	4.12915	4.21214	4.11958	4.03278	3.97281	3.86966	3.90808	3.96747	4.24773	4.12872
Smg5	0.164215	0.00722222	24	0	0.128063	5.72318	5.70019	5.77888	5.64357	5.56147	5.52106	5.52161	5.50301	5.74739	5.67124
ana1	0.164215	0.00722222	24	6	0.124522	2.14489	2.03088	2.18068	2.18097	2.15981	2.12994	1.98371	1.99618	1.89811	1.90554
CG33969	0.164215	0.00722222	18	9	0.123668	3.31902	3.28667	3.32649	3.5308	3.58632	3.44639	3.36421	3.47196	3.36853	3.36732
GstS1	0.164215	0.00722222	24	18	0.12363	6.77896	6.69681	6.74184	6.59274	6.50393	6.81398	6.92088	6.78972	6.8903	6.84972
CG30421	0.164215	0.00722222	24	0	0.120813	4.30991	4.30751	4.2538	4.24083	4.20229	4.03946	4.02781	4.08294	4.28972	4.26211
CG14253	0.164215	0.00722222	18	3	0.120372	4.0767	4.02004	4.08297	4.01033	3.97955	3.82427	3.84825	3.89158	4.02985	4.12561
LanA	0.164215	0.00722222	18	12	0.118583	3.14721	3.13322	3.10498	3.22405	3.36116	3.31876	3.46654	3.29708	2.92762	2.97758
CG14239	0.164215	0.00722222	18	6	0.118517	1.32675	1.30349	1.27576	1.59825	1.56882	1.32655	1.18444	1.26253	1.37999	1.54894
CG14183	0.164215	0.00722222	18	9	0.118428	1.68921	1.71554	1.78843	1.90252	1.94337	1.83099	1.91854	1.92346	1.80974	1.79016
Cyp4d2	0.164215	0.00722222	24	9	0.118419	5.77329	5.8296	5.78201	5.95639	5.95971	5.95128	5.90457	5.9502	5.77098	5.79455
Ak6	0.164215	0.00722222	18	6	0.117907	3.49533	3.42217	3.45057	3.61813	3.66157	3.4505	3.40232	3.29997	3.5543	3.65465
CG30203	0.164215	0.00722222	24	9	0.117757	2.16326	2.20724	2.18136	2.41858	2.28415	2.22638	2.34789	2.35037	2.09117	2.16084
upd2	0.164215	0.00722222	18	3	0.113564	1.33591	1.69025	1.33166	1.28349	1.32699	1.09957	1.19669	1.17318	1.39046	1.43723
ogre	0.164215	0.00722222	24	0	0.112938	4.98809	5.01604	5.05251	4.81837	4.85026	4.74395	4.84442	4.82921	4.91406	4.93024
Cyp301a1	0.164215	0.00722222	18	12	0.112736	2.08219	1.97567	2.05105	2.1142	2.07637	2.26906	2.1314	2.28883	1.97582	1.95294
CG41378	0.164215	0.00722222	18	9	0.111951	4.8897	4.91722	4.91786	5.14125	5.20635	4.9721	5.01918	5.04141	4.94055	5.02204
CG11555	0.164215	0.00722222	18	6	0.11065	3.58128	3.56941	3.67046	3.73812	3.768	3.4626	3.54917	3.52703	3.67316	3.77931
oys	0.164215	0.00722222	24	12	0.110379	6.1382	6.17524	6.13433	6.27977	6.36165	6.37095	6.29043	6.31712	6.19934	6.20431
CG14777	0.164215	0.00722222	24	21	0.109565	5.49613	5.5383	5.68719	5.29322	5.45137	5.46998	5.53379	5.4817	5.61284	5.76446
LBR	0.164215	0.00722222	24	12	0.108693	2.00021	2.15478	2.23612	2.31205	2.35873	2.38984	2.3516	2.45792	2.2427	2.34197
CG17508	0.164215	0.00722222	18	9	0.107513	8.27137	8.26257	8.31097	8.53665	8.54382	8.42081	8.38791	8.40396	8.26383	8.34902
rols	0.164215	0.00722222	24	12	0.107468	2.81773	2.79336	2.88837	2.89441	2.94932	3.04055	3.04036	2.98968	2.85269	2.84712
CG9008	0.164215	0.00722222	24	3	0.106131	4.77948	4.72805	4.7826	4.76374	4.6848	4.35589	4.59681	4.57033	4.71983	4.6388
CG1552	0.164215	0.00722222	24	3	0.106099	5.90171	5.97549	5.99208	5.7524	5.87845	5.72098	5.74586	5.7284	5.85479	5.76961
lush	0.164215	0.00722222	24	6	0.105416	1.94853	1.87673	1.97785	2.0538	2.07621	1.89237	1.80472	1.93641	1.79362	1.78127
CG42867	0.164215	0.00722222	18	6	0.105366	2.48263	2.37737	2.48624	2.6573	2.61779	2.41861	2.4228	2.27907	2.56538	2.61145
Lpin	0.164215	0.00722222	24	21	0.105183	6.67431	6.61237	6.58349	6.52556	6.30157	6.45297	6.55648	6.53788	6.77724	6.62199
Klp54D	0.164215	0.00722222	18	6	0.104642	1.37341	1.32799	1.27786	1.5183	1.44218	1.28778	1.22784	1.21541	1.3783	1.34076
Sra-1	0.164215	0.00722222	18	9	0.103458	4.37243	4.34198	4.39371	4.56822	4.6458	4.43002	4.4957	4.44994	4.45726	4.42853
fs(2)ltoPP43	0.164215	0.00722222	24	12	0.10211	3.18482	3.18679	3.24025	3.41167	3.30183	3.39556	3.42475	3.49871	3.38033	3.29862
Ucp4A	0.164215	0.00722222	18	15	0.101859	5.99275	5.92743	6.05367	5.84747	5.91085	6.10121	6.08572	6.05803	5.90818	5.95221
CG30411	0.164215	0.00722222	24	15	0.101386	3.01725	3.15718	3.20109	3.2767	3.17457	3.33286	3.38558	3.34593	3.21583	3.27748
Grasp65	0.164215	0.00722222	24	15	0.0996759	4.60963	4.59689	4.72581	4.70619	4.78308	4.84816	4.83014	4.85839	4.84716	4.80897
CG15706	0.164215	0.00722222	18	9	0.0995511	3.67997	3.6907	3.6918	3.84679	3.83204	3.81535	3.79435	3.8618	3.75982	3.76478
bur	0.164215	0.00722222	18	6	0.0982776	5.49513	5.52519	5.60629	5.68188	5.63994	5.45307	5.47867	5.45667	5.72929	5.6356
CG4565	0.164215	0.00722222	18	9	0.0979817	1.52645	1.64227	1.51221	1.73649	1.77409	1.68689	1.66832	1.66172	1.60236	1.59025
Taspase1	0.164215	0.00722222	24	0	0.0974436	3.12496	3.10654	3.03799	3.00421	2.98021	2.94769	2.91556	2.8303	3.06894	3.0855
CG6904	0.164215	0.00722222	24	3	0.0971763	7.66429	7.6573	7.66891	7.56527	7.63958	7.50359	7.53149	7.47447	7.53136	7.51093
Klp68D	0.164215	0.00722222	18	6	0.0969993	3.74852	3.71845	3.62224	3.85951	3.84353	3.65179	3.59333	3.6895	3.79157	3.78512
jbug	0.164215	0.00722222	18	3	0.0967785	5.52194	5.48477	5.48729	5.49489	5.38864	5.34134	5.35823	5.35021	5.56	5.59717
CG11655	0.164215	0.00722222	18	3	0.0961356	4.42899	4.4439	4.52859	4.40032	4.42514	4.13712	4.35189	4.29676	4.45161	4.48702
RpL34b	0.164215	0.00722222	24	21	0.0952996	8.51504	8.5616	8.59242	8.39051	8.38665	8.42682	8.50241	8.46838	8.54353	8.65612
Unc-89	0.164215	0.00722222	18	15	0.0943033	6.70474	6.75724	6.6524	6.55328	6.5698	6.8602	6.68507	6.82093	6.61579	6.58436
CG6796	0.164215	0.00722222	18	9	0.0937578	2.89235	2.96631	2.97978	3.13696	3.12533	3.06001	3.05863	3.08779	3.03884	3.08371
JTBR	0.164215	0.00722222	18	9	0.0921254	3.74926	3.62206	3.77888	3.95562	3.87578	3.84015	3.85667	3.89833	3.79353	3.85654
CG5463	0.164215	0.00722222	24	6	0.0916	3.57753	3.5457	3.52955	3.6056	3.68507	3.44799	3.50275	3.5604	3.37459	3.38936
fray	0.164215	0.00722222	18	6	0.0905152	5.12491	5.12162	5.13499	5.24675	5.19156	4.91311	5.00653	4.95961	5.20948	5.21791
Gprk1	0.164215	0.00722222	18	9	0.0903431	5.35596	5.42053	5.38961	5.59229	5.61167	5.4773	5.44989	5.45175	5.36796	5.42771
CG9153	0.164215	0.00722222	18	9	0.0892022	5.69719	5.71697	5.62159	5.83862	5.84105	5.8344	5.79596	5.77827	5.78281	5.7907
CG7083	0.164215	0.00722222	24	6	0.0887483	5.27497	5.17872	5.30291	5.38148	5.3508	5.20075	5.1774	5.19723	5.09184	5.17226
Fdh	0.164215	0.00722222	24	15	0.087834	5.99729	6.00685	5.90434	6.0513	6.02766	6.09263	6.21627	6.15465	6.13106	6.10134
CG31690	0.164215	0.00722222	24	0	0.0875207	2.59453	2.60794	2.60165	2.53633	2.54236	2.47039	2.44563	2.42389	2.48029	2.59435
sca	0.164215	0.00722222	18	0	0.0858049	1.71563	1.66476	1.67609	1.54063	1.54377	1.63869	1.55369	1.56073	1.63516	1.5658
fdl	0.164215	0.00722222	24	9	0.0857954	4.84497	4.82429	4.79619	5.0148	4.96326	4.84102	4.92587	4.9272	4.72538	4.81595
eIF-5A	0.164215	0.00722222	18	6	0.0844006	9.42995	9.48083	9.5153	9.5949	9.57993	9.32764	9.45527	9.38219	9.51302	9.54656
alphaCop	0.164215	0.00722222	18	9	0.0830591	5.05622	5.07035	5.16047	5.22619	5.25812	5.19761	5.24419	5.18367	5.18083	5.18561
Sir2	0.164215	0.00722222	24	9	0.0824607	4.68244	4.71351	4.67828	4.89633	4.81539	4.75643	4.80591	4.75215	4.6893	4.65665
SdhB	0.164215	0.00722222	18	15	0.0813422	10.0178	9.93187	9.98319	9.90225	9.8502	10.1363	10.0562	10.0351	9.87415	9.96039
cenB1A	0.164215	0.00722222	18	6	0.0798734	4.10312	4.09516	4.02907	4.19234	4.29469	4.03687	4.07879	4.00427	4.11987	4.17057
Traf4	0.164215	0.00722222	18	12	0.0794084	2.48238	2.64435	2.57235	2.72372	2.69228	2.80786	2.71151	2.7349	2.40663	2.54994
CG30156	0.164215	0.00722222	24	6	0.0790263	1.61848	1.55802	1.55214	1.61995	1.6307	1.5035	1.51894	1.43688	1.50311	1.48024
CG17350	0.164215	0.00722222	18	6	0.0783315	3.54198	3.49601	3.47706	3.78998	3.54318	3.44897	3.31151	3.41584	3.51823	3.69947
alpha-Est7	0.164215	0.00722222	18	12	0.0774759	7.60288	7.49423	7.54208	7.73361	7.64761	7.75787	7.6662	7.71176	7.33112	7.39841
Trp1	0.164215	0.00722222	18	9	0.0772836	5.96802	5.98233	6.04387	6.16028	6.16982	6.09294	6.07629	6.07835	6.01291	6.03305
Samuel	0.164215	0.00722222	24	12	0.077081	2.98616	3.07639	3.08774	3.1947	3.19504	3.2262	3.20819	3.18539	3.16193	3.11532
Sam-S	0.164215	0.00722222	18	12	0.0766239	7.10484	7.05652	7.23732	7.23037	7.21304	7.2769	7.31616	7.27944	6.99034	7.01781
whd	0.164215	0.00722222	18	3	0.0763279	7.15441	7.23278	7.31898	7.1355	7.04446	7.05698	7.04408	7.09541	7.4417	7.38125
twin	0.164215	0.00722222	18	9	0.0747628	4.21185	4.22675	4.12885	4.34343	4.34117	4.31326	4.22812	4.29599	4.27474	4.27972
Cyp12b2	0.164215	0.00722222	24	9	0.0739966	6.78463	6.7996	6.7668	7.01015	6.8867	6.86027	6.78436	6.84266	6.60574	6.74173
CG4239	0.164215	0.00722222	18	9	0.0733072	6.87023	6.89993	6.81175	6.99092	7.01623	6.98604	6.92929	6.95126	6.85987	6.91948
l(1)G0255	0.164215	0.00722222	18	15	0.0730095	8.22085	8.14322	8.21565	8.1421	8.10261	8.30598	8.27832	8.26596	8.10407	8.17171
CG5037	0.164215	0.00722222	18	15	0.0727731	7.02811	6.95919	7.04086	6.9199	6.9349	7.06182	7.08718	7.1005	6.93241	6.96757
CG6404	0.164215	0.00722222	18	3	0.0705387	3.6439	3.70496	3.63172	3.59397	3.50211	3.49425	3.52605	3.54495	3.79043	3.81634
CG1636	0.164215	0.00722222	24	9	0.0692562	6.20996	6.24656	6.14897	6.29707	6.26416	6.2503	6.27982	6.24236	6.04322	6.13939
eas	0.164215	0.00722222	18	12	0.068868	5.62804	5.76415	5.66347	5.72368	5.73241	5.81277	5.78588	5.82334	5.54719	5.59179
Sirt4	0.164215	0.00722222	18	15	0.0681761	5.11623	5.05514	5.02836	4.99785	4.99438	5.13333	5.13783	5.1959	5.02343	5.07031
CG11652	0.164215	0.00722222	24	3	0.0668803	3.7571	3.81585	3.78562	3.74151	3.7519	3.58042	3.68899	3.59259	3.72127	3.75427
CG10277	0.164215	0.00722222	18	9	0.0666895	5.56794	5.52223	5.50965	5.65781	5.66197	5.62163	5.62278	5.61602	5.61652	5.56785
CG34375	0.164215	0.00722222	24	21	0.066333	1.40796	1.40584	1.35096	1.31358	1.32288	1.3339	1.33019	1.30832	1.43679	1.65417
CG10226	0.164215	0.00722222	24	6	0.0657546	3.62874	3.70322	3.65663	3.68961	3.72409	3.59662	3.65067	3.62307	3.56002	3.52514
CG7536	0.164215	0.00722222	18	9	0.0654585	3.96625	4.0439	4.02823	4.15814	4.12057	4.13655	4.07319	4.11365	4.1062	4.06918
alrm	0.164215	0.00722222	18	12	0.064765	4.74964	4.7784	4.84173	4.79564	4.81719	4.87512	5.00035	4.87861	4.68966	4.70146
Spt5	0.164215	0.00722222	18	9	0.0632961	4.35139	4.45998	4.43363	4.57144	4.53786	4.51432	4.47031	4.5268	4.48751	4.44024
CG15822	0.164215	0.00722222	18	12	0.0628883	2.09984	2.16788	2.10296	2.14275	2.15777	2.29251	2.21023	2.21453	2.08649	2.01204
Cen	0.164215	0.00722222	18	6	0.0619176	3.93739	4.01564	3.95053	4.08983	4.06451	3.9226	3.88336	4.00117	4.0607	4.03415
lqfR	0.164215	0.00722222	24	12	0.061717	3.6859	3.72876	3.80167	3.81604	3.85088	3.86683	3.88042	3.87288	3.79923	3.79628
CG42366	0.164215	0.00722222	18	6	0.0610256	1.28909	1.27731	1.21789	1.37596	1.30683	1.24502	1.21384	1.18792	1.29526	1.2887
yrt	0.164215	0.00722222	24	9	0.0603961	3.64312	3.67526	3.65516	3.78202	3.73102	3.70016	3.66386	3.75773	3.59064	3.63548
mop	0.164215	0.00722222	18	6	0.0599538	4.42812	4.35579	4.40162	4.54163	4.46746	4.32007	4.33215	4.39912	4.4628	4.40216
aur	0.164215	0.00722222	18	9	0.0594974	1.2764	1.28228	1.28042	1.36848	1.45685	1.3347	1.3625	1.31069	1.30493	1.34297
CG12162	0.164215	0.00722222	18	15	0.0592419	6.3851	6.40829	6.41324	6.3441	6.35741	6.56317	6.49545	6.48942	6.38895	6.39339
bs	0.164215	0.00722222	24	15	0.0591608	2.78955	2.76155	2.82265	2.81459	2.83499	2.87844	2.927	2.89825	2.86288	2.88856
pgant8	0.164215	0.00722222	24	12	0.0572064	2.43036	2.39047	2.4111	2.52274	2.492	2.50648	2.50187	2.60668	2.48592	2.45143
CG6455	0.164215	0.00722222	18	12	0.0570716	7.42386	7.34195	7.36995	7.40206	7.37715	7.51466	7.42455	7.48076	7.24165	7.31066
CG7280	0.164215	0.00722222	18	3	0.0566138	3.83287	3.70747	3.81383	3.72456	3.72852	3.67238	3.66172	3.69945	3.87191	3.96634
pnt	0.164215	0.00722222	24	9	0.055044	2.84223	2.79071	2.80275	2.86317	2.95782	2.8228	2.8791	2.86142	2.72341	2.78358
tkv	0.164215	0.00722222	18	3	0.0548117	4.80619	4.8602	4.85237	4.82863	4.7629	4.75231	4.75176	4.71193	4.92991	4.8546
Xe7	0.164215	0.00722222	18	0	0.0546556	5.40158	5.40396	5.4082	5.31131	5.32867	5.35295	5.31177	5.3688	5.37204	5.3571
mRpL55	0.164215	0.00722222	18	3	0.0528499	4.76579	4.76539	4.72574	4.7353	4.67519	4.69085	4.61031	4.6674	4.77993	4.95493
Vrp1	0.164215	0.00722222	18	3	0.0519255	4.32717	4.30711	4.34552	4.31043	4.31717	4.19198	4.27377	4.2119	4.38172	4.3726
Cdk5alpha	0.164215	0.00722222	24	3	0.0506373	3.85511	3.90146	3.88655	3.87112	3.81839	3.79015	3.79951	3.75624	3.80961	3.82246
CG30069	0.164215	0.00722222	24	6	0.0501614	3.87398	3.89647	3.8515	3.9675	3.92557	3.83881	3.84536	3.87467	3.80304	3.79341
GNBP1	0.164215	0.00722222	18	6	0.0500966	4.02261	4.01324	4.06889	4.07904	4.14581	3.96258	4.00487	3.99784	4.06782	4.05624
boi	0.164215	0.00722222	18	12	0.0496141	2.25241	2.32348	2.31416	2.33125	2.35848	2.39464	2.43106	2.36227	2.27959	2.25735
vret	0.164215	0.00722222	18	6	0.0473196	1.30266	1.27074	1.26316	1.32361	1.40879	1.23526	1.24356	1.2043	1.30126	1.37103
CG18304	0.164215	0.00722222	18	12	0.0459234	4.82224	4.97295	4.93865	4.98554	4.98856	5.01824	5.03948	5.02036	4.82874	4.9352
CG8108	0.164215	0.00722222	18	6	0.0456741	5.56711	5.57209	5.54231	5.62039	5.59197	5.53805	5.45716	5.47715	5.60166	5.60704
CG8974	0.164215	0.00722222	18	6	0.045456	5.49756	5.51174	5.49256	5.67116	5.6969	5.46907	5.51073	5.47028	5.56868	5.61612
Gp150	0.164215	0.00722222	24	3	0.0434588	7.95606	7.96497	7.94704	7.93716	7.93406	7.91805	7.87928	7.85142	7.86015	7.92161
CG7381	0.164215	0.00722222	18	6	0.0418335	2.02119	1.98616	1.99354	2.02643	2.10086	1.95142	1.98311	1.83556	2.01824	2.00345
por	0.164215	0.00722222	24	18	0.0412314	2.12827	2.18598	2.17387	2.10601	2.15742	2.19266	2.2008	2.21573	2.21528	2.37159
NTPase	0.164215	0.00722222	24	12	0.0411105	6.4809	6.53018	6.52724	6.59287	6.59177	6.62166	6.62793	6.58331	6.57972	6.57557
rgn	0.164215	0.00722222	18	3	0.0408195	5.197	5.22005	5.25499	5.1811	5.25211	4.98128	5.17482	5.1716	5.36735	5.36626
CG10899	0.164215	0.00722222	24	18	0.0385621	1.03606	1.04061	1.07622	1.02765	1.0107	1.04893	1.06628	1.0906	1.12742	2.60157
Ctr1A	0.164215	0.00722222	18	9	0.038065	4.53332	4.49572	4.58585	4.62327	4.63256	4.61298	4.59292	4.61274	4.51843	4.59064
CG7372	0.164215	0.00722222	24	6	0.036363	1.50759	1.50831	1.52085	1.52643	1.52654	1.4623	1.48896	1.46206	1.475	1.44534
CG42674	0.164215	0.00722222	18	3	0.0352846	3.10653	3.07814	3.079	3.07639	3.10015	3.06444	3.01377	2.94012	3.30013	3.13948
mir-304	0.234032	0.0127778	24	9	0.329324	1.35569	1	1.30998	1.89144	1.6558	1.46573	1.42887	1.77896	1	1.23593
mir-10	0.234032	0.0127778	24	0	0.138756	1.21384	2.05742	1.18519	1.11294	1	1	1	1	1.19623	1.1395
snoRNA:Psi18S-176	0.234032	0.0127778	18	3	0.0541428	1.11088	1.06357	1.09556	1.05758	1	1	1	1	1.10145	1.26669
CheB38b	0.234032	0.0183333	18	6	1.23414	5.55665	3.78859	3.82167	5.87336	5.49226	3.74002	3.17554	3.11628	4.78838	5.28726
Mal-B1	0.234032	0.0183333	24	21	0.985069	5.78865	6.21453	6.43654	4.75441	4.51819	4.75338	5.66967	4.86788	6.61067	5.92594
Lsp1alpha	0.234032	0.0183333	24	15	0.915645	2.86599	2.71681	2.81618	2.85073	2.7579	4.05282	4.45032	4.80477	4.04367	3.42479
Obp49a	0.234032	0.0183333	18	6	0.911102	5.7629	4.80683	4.37246	6.19739	5.84325	4.68652	3.73407	4.36065	5.24525	5.99993
CheA87a	0.234032	0.0183333	18	6	0.909971	5.63306	4.36021	4.51231	6.55144	5.79514	4.72354	3.84465	4.32398	5.19641	5.77902
PGRP-SC2	0.234032	0.0183333	24	18	0.771971	3.27345	3.56075	3.74431	3.23785	3.50252	4.90116	4.35545	3.96124	4.59425	4.79429
CG5867	0.234032	0.0183333	24	6	0.614967	8.42721	8.35207	8.60543	8.40588	8.5147	7.73573	7.58619	7.79841	7.01048	7.47312
CR42786	0.234032	0.0183333	24	3	0.570477	2.38747	2.28804	2.56779	1.89578	1.93198	1.33683	1.84113	1.2602	1.48126	1.29856
CG1441	0.234032	0.0183333	24	3	0.55139	4.95197	4.8887	4.43278	4.52226	3.74248	3.60576	3.47946	3.74218	3.9937	4.26149
MtnD	0.234032	0.0183333	18	9	0.521406	2.28497	2.94904	3.01461	3.54313	3.96086	3.50607	3.93938	3.33531	2.44345	3.26994
TwdlT	0.234032	0.0183333	24	3	0.491987	3.30749	3.15642	3.30382	2.96601	2.91408	2.32324	2.4538	2.59964	2.46064	2.40283
CG15661	0.234032	0.0183333	24	0	0.490004	3.83491	3.74635	4.42357	3.7239	3.14194	2.74344	3.47506	2.89285	3.69917	3.6359
CG18537	0.234032	0.0183333	18	6	0.485122	3.33728	2.93905	2.77191	4.14242	3.44828	2.67615	2.44967	2.48845	2.86513	3.68876
bgm	0.234032	0.0183333	24	6	0.473136	5.43782	5.37872	5.61579	5.33964	5.75095	5.08778	5.17518	4.74937	4.52086	4.62286
CG18539	0.234032	0.0183333	18	6	0.471771	2.9312	2.75461	2.37973	3.8177	3.11152	2.3123	2.03934	2.41236	2.81137	3.33877
CG10621	0.234032	0.0183333	18	12	0.450553	5.406	5.29256	5.23617	5.82281	5.71204	6.11624	5.91029	6.36866	5.61589	5.08151
CG9815	0.234032	0.0183333	24	15	0.444235	1.80501	1.61383	1.9302	1.80611	1.82596	2.65557	2.36681	2.4619	2.24045	2.43435
CG34227	0.234032	0.0183333	24	21	0.443772	4.50874	4.57783	4.76362	3.9655	4.03389	3.79816	4.19339	4.21397	5.2595	4.66148
CG7724	0.234032	0.0183333	24	3	0.428138	5.06356	5.02196	4.63159	4.99031	4.49055	4.23541	4.08707	4.25249	4.13118	4.47887
CG6834	0.234032	0.0183333	24	9	0.427858	3.66864	3.7472	4.16511	4.36836	4.35228	4.059	4.05389	3.84875	3.01987	3.1905
CG43093	0.234032	0.0183333	24	6	0.415244	7.53247	7.51748	7.20435	7.5426	7.06727	6.89953	6.9439	6.90756	6.69924	6.68558
CG43094	0.234032	0.0183333	24	0	0.402748	2.68491	2.69188	2.51859	2.37449	1.74383	1.67172	1.94902	1.7209	2.24538	2.23716
CG1628	0.234032	0.0183333	18	15	0.402059	4.36556	4.85143	4.50711	4.06901	4.28066	5.02409	4.94788	5.0861	4.24013	4.58214
CG31100	0.234032	0.0183333	24	18	0.39677	3.53813	3.93493	3.74778	3.80392	3.64094	4.24488	4.13685	4.20206	4.45727	4.43533
CG31522	0.234032	0.0183333	24	3	0.393571	6.99601	7.05155	6.95225	6.69895	6.83861	6.49705	6.22303	6.39565	6.27217	6.43141
Cyp6a21	0.234032	0.0183333	24	0	0.389757	4.34656	4.24588	3.9428	3.81324	3.45365	3.47052	3.33965	3.39337	3.71024	3.94457
snoRNA:Psi28S-1232	0.234032	0.0183333	18	0	0.380692	2.15154	1.98846	1.74258	1.34121	1.26932	1.4401	1.3449	1.7781	1.63874	1.78303
Obp99d	0.234032	0.0183333	18	3	0.371212	2.3137	2.79219	2.52862	2.56255	2.24066	1.66646	2.2947	1.76552	3.10637	2.81976
CG16985	0.234032	0.0183333	24	3	0.352609	5.91424	6.00283	6.24239	5.33362	5.81997	5.26231	5.47686	5.18892	5.4869	5.59813
dob	0.234032	0.0183333	18	0	0.342795	3.87574	4.13992	4.02244	3.41618	3.35103	3.49336	3.57758	3.72949	3.50515	3.71072
salm	0.234032	0.0183333	18	9	0.338358	3.45846	3.42072	3.35383	4.06237	4.01448	3.74602	3.74343	3.90867	3.9592	3.69796
Naam	0.234032	0.0183333	18	6	0.333231	3.77927	3.79152	3.51855	4.25516	3.98518	3.28283	3.20204	3.42982	3.55037	4.02998
CG3513	0.234032	0.0183333	18	15	0.331721	2.69574	2.69179	2.71974	2.27681	1.96923	2.96097	2.963	2.94841	2.07994	1.84371
Cyt-b5-r	0.234032	0.0183333	24	0	0.32029	9.41507	9.40247	9.60653	8.86967	9.04135	8.69069	8.89239	8.73735	8.93511	8.98554
CG43092	0.234032	0.0183333	24	3	0.312628	7.21568	7.33445	6.98976	7.38705	6.89747	6.58768	6.66641	6.71898	6.80152	6.87817
CG9782	0.234032	0.0183333	24	18	0.310936	3.07057	3.24288	3.29759	2.81032	3.11476	3.46697	3.55449	3.60051	3.50332	4.11643
GstE3	0.234032	0.0183333	24	0	0.305329	5.9706	6.00677	5.70336	5.65941	5.39886	5.33775	5.44351	5.37248	5.79391	5.82977
CG7589	0.234032	0.0183333	24	12	0.30137	4.33661	4.45022	4.71029	4.7854	4.96776	5.07419	5.07943	4.87642	4.56436	4.64445
CG3902	0.234032	0.0183333	24	0	0.301184	8.52251	8.47532	8.54171	8.01051	7.98841	7.72331	7.9466	7.7871	8.06883	7.84411
NtR	0.234032	0.0183333	24	9	0.299689	5.1418	5.11293	5.1899	5.38387	5.56562	5.38288	5.6607	5.51812	4.26905	4.97581
snoRNA:684	0.234032	0.0183333	24	15	0.298649	1.83884	1.2362	1.18296	1.48742	1.63832	1.97615	1.90978	2.09135	1.89763	1.76685
Got2	0.234032	0.0183333	24	0	0.29207	6.45846	6.47472	6.52762	6.09898	6.05004	5.91362	6.14103	6.01979	6.46309	6.32877
verm	0.234032	0.0183333	24	0	0.286229	3.30653	3.40904	3.38879	2.98284	3.06602	2.85826	2.89511	3.00425	3.3386	3.36804
CG18812	0.234032	0.0183333	24	0	0.28383	6.56822	6.88641	6.76647	6.63518	6.44405	6.16682	6.30339	6.1498	6.71417	6.69371
cln3	0.234032	0.0183333	24	21	0.281147	5.08516	5.47031	5.47673	4.91533	4.99686	5.17592	5.31293	5.22525	5.89126	5.68414
CG33109	0.234032	0.0183333	18	12	0.27763	6.56984	6.17532	6.46136	6.43292	6.76498	7.05171	6.64809	7.003	5.72671	5.64167
CG8708	0.234032	0.0183333	24	21	0.276974	4.42963	4.67298	4.59358	3.88659	4.15959	4.35237	4.42792	4.06475	4.53036	4.7307
CG14141	0.234032	0.0183333	24	12	0.271673	3.50501	3.67048	3.41421	3.8962	3.63748	4.08649	3.98363	4.0806	3.59393	3.70228
CG9864	0.234032	0.0183333	24	15	0.270117	2.8581	3.26182	3.39661	3.07348	3.53883	3.92084	3.60155	3.65162	3.40249	3.5673
Obp8a	0.234032	0.0183333	24	6	0.269173	4.26796	4.32122	4.04211	4.36872	4.19106	3.94055	3.97348	4.11215	3.48637	3.72984
Cht9	0.234032	0.0183333	18	15	0.267862	6.89533	7.11916	7.27782	6.69642	6.73208	7.07481	7.47056	7.26994	6.82072	6.77774
tRNA:CR31485:Psi	0.234032	0.0183333	18	6	0.267736	1	1.25105	1.19468	1.51548	1.67323	1.15682	1	1	1.20625	1.27997
CG14529	0.234032	0.0183333	18	3	0.259691	1.88771	2.17153	2.02594	1.57754	1.7487	1.57785	1.52648	1.46374	2.16658	2.07719
CG8449	0.234032	0.0183333	18	9	0.258407	4.77865	4.7541	4.86274	5.06674	5.29939	5.1594	5.17367	5.2055	4.96788	5.04736
r-l	0.234032	0.0183333	18	3	0.258199	2.68179	3.12713	3.28818	2.76364	3.03601	2.65539	2.63707	2.68634	3.33145	3.66897
CG10211	0.234032	0.0183333	24	18	0.255065	3.49298	3.64525	3.41287	3.41615	3.34504	3.54278	3.56726	3.89257	4.02202	4.03107
CG31777	0.234032	0.0183333	24	3	0.254803	5.65645	5.37339	5.57455	5.1509	5.05007	5.01304	4.86211	4.96102	5.0993	4.94578
yip7	0.234032	0.0183333	18	12	0.247123	10.6881	10.9453	10.4959	11.0052	10.6394	11.1052	10.9683	11.2939	10.3076	10.091
CG1092	0.234032	0.0183333	24	9	0.246662	5.12059	5.15134	5.0994	5.24369	5.46106	5.43178	5.44824	5.39131	4.69727	4.9258
sas	0.234032	0.0183333	24	6	0.245337	3.3509	3.28936	3.17075	3.48411	3.35401	2.97722	2.94368	3.00705	2.90872	3.06981
CG5697	0.234032	0.0183333	24	21	0.244163	2.86491	3.02564	3.02384	2.57632	2.603	2.59111	2.7323	2.76551	3.28907	2.9483
CG9238	0.234032	0.0183333	24	0	0.242485	7.6417	7.63352	7.52867	7.35874	7.58614	7.09415	7.13111	7.08239	7.58707	7.43331
alpha-Est8	0.234032	0.0183333	18	12	0.240122	5.3936	5.67011	5.3236	5.79354	5.35057	6.08964	5.67667	5.85039	4.94646	5.08704
CG14629	0.234032	0.0183333	18	12	0.229911	8.00598	7.93646	7.96155	8.09425	8.21523	8.33951	8.31632	8.39838	7.92821	8.05968
CG11149	0.234032	0.0183333	24	21	0.229312	3.03	3.15991	3.0539	2.9769	2.69103	3.05116	2.78271	2.97562	3.47474	3.3461
CG30339	0.234032	0.0183333	24	12	0.22721	2.9176	2.74848	2.68548	3.23892	3.00965	3.33097	3.16242	3.36129	3.08988	3.08925
itp	0.234032	0.0183333	24	3	0.219712	4.41572	4.42197	4.32452	4.51943	4.25104	4.0081	3.94032	4.03132	4.2317	4.1625
Sr-CI	0.234032	0.0183333	24	9	0.218472	4.96151	5.05634	5.16765	5.28989	5.2679	5.21517	5.28068	5.29246	4.33848	4.90536
Tsp	0.234032	0.0183333	24	12	0.21561	4.07817	4.07818	4.08741	4.46444	4.1937	4.52386	4.52941	4.41644	4.21894	4.26981
CG8180	0.234032	0.0183333	18	12	0.211856	3.86631	3.86297	3.88412	4.01759	4.03501	4.21972	4.1755	4.1906	3.69294	3.90082
CG3270	0.234032	0.0183333	24	18	0.21137	3.84245	4.21907	4.16273	3.96073	4.12169	4.23883	4.26915	4.20023	4.7261	4.47939
CG11825	0.234032	0.0183333	18	3	0.210069	2.7996	3.03254	3.18901	3.03028	2.77302	2.6458	2.72563	2.73489	3.10255	3.14312
Best2	0.234032	0.0183333	24	15	0.206715	4.74932	4.68667	4.51929	4.85043	4.65133	5.03782	5.02284	5.13949	4.92375	4.842
Ssrp	0.234032	0.0183333	18	6	0.205253	3.72668	4.06731	4.07273	4.35397	4.37585	4.00843	4.01695	3.9072	4.20459	4.32285
Galk	0.234032	0.0183333	24	0	0.205072	5.76953	5.88518	6.11037	5.59516	5.72082	5.46197	5.63295	5.53017	5.88093	5.83526
CG13086	0.234032	0.0183333	24	12	0.202727	4.93913	5.05044	5.13279	5.20125	5.33714	5.25947	5.60853	5.5968	5.30457	5.17154
CG1532	0.234032	0.0183333	24	12	0.198568	5.78684	5.93948	5.89328	6.13125	6.184	6.22029	6.07662	6.24797	5.90136	5.96473
CG13575	0.234032	0.0183333	24	0	0.197494	1.66044	1.40566	1.5507	1.18206	1.28699	1.12636	1.18477	1.1922	1.37578	1.41064
CG6739	0.234032	0.0183333	18	12	0.196933	1.39849	1.38403	1.36982	1.56282	1.45574	1.73619	1.66976	1.67004	1.32993	1.43234
MP1	0.234032	0.0183333	18	9	0.195554	6.03222	5.96395	6.11476	6.3412	6.37873	6.34349	6.32949	6.37255	6.05967	6.25584
Cat	0.234032	0.0183333	18	9	0.195119	7.95389	7.90789	7.90815	8.23679	8.17797	8.1244	8.32987	8.18995	8.09133	8.08442
CG10970	0.234032	0.0183333	24	3	0.192146	2.16596	2.0678	2.32046	2.11829	2.09974	1.79607	1.97347	1.77403	1.93912	1.98893
TepIV	0.234032	0.0183333	24	6	0.189773	6.70833	6.75147	6.743	6.91494	6.67115	6.47462	6.49136	6.56041	6.40566	6.44464
sqz	0.234032	0.0183333	18	0	0.187947	2.47182	2.4675	2.45324	2.11937	2.16873	2.20259	2.22052	2.25443	2.47865	2.28697
Lcp65Ag2	0.234032	0.0183333	24	15	0.1879	1.21238	1.20579	1.30225	1.33981	1.21398	1.79991	1.62947	1.47971	1.22069	1.41264
Spn1	0.234032	0.0183333	24	12	0.187415	5.72966	5.64068	5.79923	5.86531	5.95247	5.96714	6.15315	5.99729	5.59744	5.85906
CG11842	0.234032	0.0183333	18	3	0.186185	4.72042	4.58449	4.89859	4.71244	4.64898	4.15301	4.53345	4.42302	4.78392	4.96538
CG4797	0.234032	0.0183333	24	21	0.18594	4.53811	4.64845	4.66976	4.24612	4.11553	4.35684	4.60473	4.51714	4.61857	4.74999
CG14762	0.234032	0.0183333	24	9	0.183946	5.89129	5.62054	5.79796	6.08176	6.08625	5.96862	5.88349	5.98581	5.70848	5.73042
Msr-110	0.234032	0.0183333	24	9	0.183516	8.74991	8.77271	8.79661	9.10191	9.13826	9.00025	8.95439	9.03224	8.61122	8.88767
CG32702	0.234032	0.0183333	24	9	0.180774	2.68611	2.65422	2.72933	3.12879	2.85753	2.92742	2.88268	2.87186	2.40646	2.60288
CG31103	0.234032	0.0183333	24	9	0.180155	5.59533	5.56413	5.64373	5.84229	5.73926	5.81891	5.79015	5.81656	5.26168	5.42396
TRAM	0.234032	0.0183333	24	15	0.179988	4.0512	4.18396	4.3048	4.42959	4.49474	4.5815	4.6405	4.523	4.60893	4.53838
CG42806	0.234032	0.0183333	24	21	0.179616	4.29349	4.35529	4.3212	4.05294	4.00173	4.07621	4.19108	4.06967	4.39303	4.29297
CG4577	0.234032	0.0183333	18	0	0.178584	5.62725	5.63235	5.56026	5.34484	5.28479	5.38726	5.25985	5.39521	5.56297	5.41657
CG42714	0.234032	0.0183333	24	12	0.177947	3.76191	3.70882	3.68373	3.93725	3.96377	4.1263	4.16518	3.8925	3.8012	3.91353
CG7768	0.234032	0.0183333	18	9	0.174827	2.35815	2.40975	2.29761	2.60428	2.79725	2.65725	2.60513	2.43666	2.42881	2.40524
bmm	0.234032	0.0183333	18	3	0.173697	5.92626	5.93404	6.14603	5.92396	5.67498	5.48752	5.74756	5.68096	6.22801	6.11822
CG14945	0.234032	0.0183333	18	9	0.173628	4.01717	4.35089	4.20561	4.52241	4.57891	4.5576	4.45068	4.48642	4.14422	4.37399
Ate1	0.234032	0.0183333	24	3	0.173098	4.68083	4.7966	4.74591	4.65149	4.61604	4.45371	4.44487	4.42266	4.40975	4.49946
CG4829	0.234032	0.0183333	24	12	0.171619	3.77799	3.87093	3.83777	4.08913	4.03572	4.11152	4.09566	4.07395	3.79608	3.96561
colt	0.234032	0.0183333	18	0	0.17038	6.65681	6.6937	6.61274	6.42663	6.3244	6.41471	6.417	6.41896	6.52324	6.52267
CG8306	0.234032	0.0183333	24	18	0.169822	5.96221	6.05247	5.9645	6.07361	5.96052	6.11881	6.20069	6.22218	6.34939	6.47527
CG32669	0.234032	0.0183333	24	15	0.168935	2.33438	2.46308	2.46232	2.46954	2.63045	2.69077	2.79691	2.70768	2.54326	2.79141
Tapdelta	0.234032	0.0183333	24	15	0.16797	6.15949	6.24743	6.32064	6.34964	6.45059	6.5287	6.58718	6.54957	6.54465	6.58003
Cyp28d1	0.234032	0.0183333	18	12	0.166555	7.21655	7.20208	7.23159	7.41366	7.25956	7.4584	7.46503	7.51628	7.25763	7.19678
Acox57D-d	0.234032	0.0183333	24	15	0.165088	3.11435	3.26725	3.17983	3.32802	3.3673	3.49897	3.58464	3.40047	3.53807	3.48055
yellow-d	0.234032	0.0183333	18	15	0.161159	6.25273	6.37985	6.4522	6.07508	6.17599	6.47721	6.93305	6.42221	6.16655	6.27939
Hex-C	0.234032	0.0183333	18	3	0.159654	6.02779	5.7423	5.97274	5.95116	5.94602	5.46074	5.86153	5.7141	6.50572	6.34648
CG1124	0.234032	0.0183333	24	9	0.159311	6.73685	6.6397	6.65279	6.7378	7.00523	6.80882	6.65674	6.66066	5.98189	6.36138
MRP	0.234032	0.0183333	18	6	0.158004	5.38748	5.49681	5.63997	5.79422	5.71861	5.49596	5.48449	5.38254	5.71624	5.56858
CG3246	0.234032	0.0183333	24	12	0.157244	6.32188	6.22824	6.30365	6.40618	6.61443	6.49694	6.69214	6.54425	6.35415	6.45084
Csas	0.234032	0.0183333	24	9	0.156924	4.01079	3.92582	4.152	4.26099	4.21336	4.14775	4.19193	4.10373	3.94297	3.83933
CG5195	0.234032	0.0183333	18	15	0.156033	2.78542	2.90306	2.94715	2.8071	2.74045	3.27856	3.15658	3.41288	2.74908	2.7496
CG6231	0.234032	0.0183333	24	18	0.155828	3.83941	3.9289	4.04839	3.9181	3.84458	3.96719	4.1371	4.13847	4.45071	4.13906
kst	0.234032	0.0183333	24	3	0.155567	5.05913	5.12373	5.1296	5.00489	5.12284	4.89004	4.90373	4.75436	5.0325	4.89431
sun	0.234032	0.0183333	18	0	0.154589	7.98184	7.78191	7.88016	7.59065	7.50055	7.72428	7.71959	7.68466	7.65992	7.78126
Cyp6d5	0.234032	0.0183333	24	21	0.153702	7.33956	7.39803	7.40967	7.2989	7.00889	7.18791	7.18347	7.38678	7.49337	7.68223
Pu	0.234032	0.0183333	24	15	0.153333	5.27659	5.29117	5.29949	5.29502	5.27683	5.51609	5.52868	5.5353	5.38227	5.4682
CG8129	0.234032	0.0183333	24	3	0.151208	4.53691	4.70082	4.86242	4.60932	4.53066	4.37808	4.33468	4.44339	4.48698	4.33862
CG1236	0.234032	0.0183333	18	9	0.151105	4.29927	4.17847	4.27445	4.45235	4.55644	4.46865	4.53141	4.39463	4.38268	4.43508
CG3829	0.234032	0.0183333	24	12	0.150638	5.31994	5.3415	5.51079	5.62591	5.50983	5.70859	5.71623	5.82045	5.60277	5.47648
Cda5	0.234032	0.0183333	18	0	0.149793	3.49636	3.38706	3.22769	3.16795	3.01862	3.17552	3.01933	3.17883	3.38009	3.26662
dsx	0.234032	0.0183333	18	12	0.149387	4.70164	4.64413	4.58101	4.69943	4.71947	4.9118	4.80156	4.97859	4.67935	4.57912
CG42272	0.234032	0.0183333	18	0	0.148168	1.52871	1.53651	1.61962	1.3237	1.24186	1.33739	1.37414	1.32806	1.54989	1.37206
spel1	0.234032	0.0183333	24	6	0.148084	2.84256	2.686	2.81143	2.82446	2.81751	2.63528	2.6159	2.55224	2.52118	2.61504
mp	0.234032	0.0183333	24	3	0.147441	3.3342	3.1549	3.12223	3.17807	3.05009	2.8927	2.9337	2.9437	3.05119	2.96026
CG17337	0.234032	0.0183333	24	9	0.146271	5.42439	5.5279	5.576	5.76718	5.73869	5.71766	5.65141	5.73482	5.50693	5.57345
caps	0.234032	0.0183333	24	6	0.145831	4.80092	4.698	4.73831	4.86302	4.88227	4.60364	4.60037	4.55352	4.60968	4.53258
CG18446	0.234032	0.0183333	24	12	0.144246	1.54549	1.4652	1.30377	1.67436	1.75201	1.71551	1.78858	1.74771	1.71531	1.58041
CG34331	0.234032	0.0183333	18	12	0.14423	6.69334	6.48586	6.48529	6.69086	6.86002	6.82398	6.89938	6.81458	6.40266	6.45103
CG11760	0.234032	0.0183333	24	15	0.144077	3.75633	3.77993	3.87394	3.91532	3.95072	4.22821	4.14646	3.98369	4.0318	3.89352
CG33170	0.234032	0.0183333	24	3	0.142937	5.90471	5.8829	5.86783	5.75196	5.78549	5.67575	5.65781	5.58553	5.59903	5.66726
CG13624	0.234032	0.0183333	18	3	0.142171	4.67793	4.70499	4.65185	4.63771	4.55548	4.42678	4.36497	4.50722	4.84994	4.65037
CG10031	0.234032	0.0183333	24	9	0.141301	5.72685	5.7519	5.75291	6.03071	6.07551	5.91057	5.72604	5.89341	5.56865	5.69358
tsl	0.234032	0.0183333	18	9	0.140317	4.94813	4.80921	4.98811	5.21381	5.1519	5.08615	5.14124	5.16628	4.9766	4.95779
Cyp4d8	0.234032	0.0183333	24	12	0.139958	3.8247	3.79788	3.92803	4.08644	4.03364	4.05045	4.12952	4.07472	3.9187	3.93159
CG15553	0.234032	0.0183333	18	6	0.139835	3.72537	3.7824	3.77039	4.01599	3.92177	3.5354	3.72266	3.64979	3.97355	4.11501
sty	0.234032	0.0183333	18	3	0.139808	4.15767	4.17384	3.96431	3.93671	3.97177	3.78987	3.81312	3.87428	4.24307	4.01233
Got1	0.234032	0.0183333	24	3	0.139356	7.66907	7.65423	7.69256	7.62587	7.60425	7.39248	7.56016	7.44942	7.43833	7.47199
CG4610	0.234032	0.0183333	18	9	0.139254	5.00091	5.02504	4.93731	5.17593	5.28199	5.2439	5.07859	5.16604	5.01896	5.15894
CG12081	0.234032	0.0183333	18	9	0.138954	3.3245	3.42767	3.46923	3.59481	3.66478	3.7437	3.58364	3.54209	3.48207	3.56744
mRpS5	0.234032	0.0183333	24	9	0.13874	7.14249	7.04832	6.99251	7.31915	7.27779	7.24453	7.04122	7.16098	7.0347	6.86164
CG34229	0.234032	0.0183333	18	6	0.138628	3.81708	3.93727	3.92332	4.03263	4.30942	3.74676	3.93581	3.7979	4.04311	3.99271
CR32207	0.234032	0.0183333	24	12	0.136176	1.49265	1.46934	1.53963	1.74349	1.75546	1.75987	1.65374	1.90721	1.68925	1.6379
Cht11	0.234032	0.0183333	18	9	0.135766	2.91731	2.98451	2.87739	3.12909	3.1909	3.00527	3.10452	3.1556	3.01197	3.09475
RecQ5	0.234032	0.0183333	18	9	0.135619	4.46621	4.48897	4.4545	4.81871	4.79623	4.6328	4.64411	4.65637	4.71756	4.49169
Cyp28a5	0.234032	0.0183333	24	9	0.135598	6.3625	6.20419	6.40024	6.52259	6.43888	6.43869	6.47725	6.46358	6.15773	6.27157
Hr38	0.234032	0.0183333	18	3	0.135341	2.38903	2.27927	2.25741	2.12324	1.95878	1.97452	1.93234	2.11281	2.58106	2.36208
CG7272	0.234032	0.0183333	18	12	0.135056	6.4659	6.6193	6.60065	6.75838	6.76298	6.75632	6.82469	6.86428	6.29025	6.53627
Cyp4ae1	0.234032	0.0183333	24	21	0.133666	2.95529	2.94753	2.99162	2.77987	2.80258	2.91171	3.00681	2.85225	3.16847	3.24667
CG1126	0.234032	0.0183333	24	6	0.132742	1.59218	1.57752	1.53852	1.7059	1.64808	1.44323	1.38031	1.44769	1.36396	1.51817
nimB4	0.234032	0.0183333	24	12	0.132116	3.49928	3.61515	3.66798	3.77866	3.85482	3.80527	3.86672	3.81718	3.65568	3.72751
CG2371	0.234032	0.0183333	18	9	0.130653	2.77773	2.78423	2.70858	3.01597	3.01319	2.93567	2.9188	2.9264	2.81603	2.93716
Sply	0.234032	0.0183333	18	9	0.130394	4.66139	4.73614	4.86383	4.98867	5.0499	4.94031	4.91887	4.99991	4.75811	4.86151
CG42255	0.234032	0.0183333	18	12	0.130393	1.58272	1.80247	1.72068	2.03555	1.85613	1.97281	2.0476	1.92097	1.27428	1.65172
Mrp4	0.234032	0.0183333	24	3	0.129975	3.68834	3.66694	3.53162	3.68431	3.61296	3.39809	3.45924	3.43908	3.48313	3.51329
CG42709	0.234032	0.0183333	24	21	0.129845	3.61102	3.72331	3.63957	3.46859	3.59669	3.52559	3.56221	3.54845	3.8592	3.89174
CG31769	0.234032	0.0183333	18	9	0.129623	7.25721	7.17005	7.21132	7.44264	7.39265	7.28699	7.41092	7.42424	7.34682	7.25959
CG7133	0.234032	0.0183333	18	9	0.128739	4.01446	4.10834	4.02794	4.28679	4.29131	4.23791	4.20518	4.07019	4.15597	4.13505
Pxn	0.234032	0.0183333	18	12	0.128733	3.81752	3.81413	3.75431	3.79291	3.8156	4.0754	3.936	4.13602	3.35365	3.57478
Sec61alpha	0.234032	0.0183333	24	15	0.1286	6.49333	6.50361	6.6126	6.6684	6.7426	6.76309	6.9091	6.75545	6.84759	6.68377
slx1	0.234032	0.0183333	18	9	0.12812	1.8184	1.75078	1.62506	1.9348	2.00962	1.90834	1.93977	1.92961	1.693	1.87312
gb	0.234032	0.0183333	24	3	0.1271	2.58542	2.6471	2.70139	2.55645	2.65342	2.36464	2.52164	2.32449	2.52635	2.51794
CG33138	0.234032	0.0183333	18	3	0.127011	6.7401	6.70668	6.82863	6.57819	6.72247	6.49765	6.61383	6.50713	6.83798	6.82462
CG11594	0.234032	0.0183333	18	12	0.126531	6.13533	6.20196	6.15757	6.207	6.25541	6.29393	6.5214	6.44471	6.1826	6.14534
Hsp60	0.234032	0.0183333	24	18	0.126446	6.99541	6.96144	7.0783	7.00559	6.97219	7.10674	7.11945	7.17541	7.27312	7.18441
CG8586	0.234032	0.0183333	18	12	0.124942	6.84567	6.86786	6.95279	6.9861	6.94925	7.06707	7.14918	7.12071	6.80891	6.93911
CG4893	0.234032	0.0183333	24	3	0.124872	5.00475	5.09596	5.07915	4.97385	5.0424	4.82867	4.73861	4.72287	4.93434	5.00985
CG8083	0.234032	0.0183333	18	12	0.124278	2.35472	2.58024	2.53119	2.54774	2.64471	2.64634	2.7336	2.82579	2.37622	2.49187
AlkB	0.234032	0.0183333	18	9	0.123527	2.47221	2.36228	2.38193	2.70197	2.67182	2.53171	2.46534	2.55043	2.46143	2.40962
CG18347	0.234032	0.0183333	24	3	0.12312	4.68422	4.68815	4.55586	4.68042	4.50505	4.39994	4.49509	4.42176	4.5063	4.4673
DAT	0.234032	0.0183333	18	0	0.122871	2.26249	2.21242	2.2626	2.02343	2.01196	2.06369	2.2058	2.16044	2.26776	2.20663
mwh	0.234032	0.0183333	18	0	0.122606	2.06454	2.15249	2.00157	1.82618	1.77068	1.89315	1.90815	2.00227	1.93475	2.02235
CG32486	0.234032	0.0183333	24	3	0.121165	6.65243	6.66887	6.62456	6.65963	6.61712	6.4904	6.44674	6.44577	6.45536	6.60289
Wnt6	0.234032	0.0183333	24	3	0.120664	4.42234	4.46847	4.3494	4.34189	4.27854	4.18103	4.17875	4.22201	4.11527	4.26567
CG31871	0.234032	0.0183333	24	0	0.12065	1.62201	1.59132	1.61783	1.44743	1.44742	1.31597	1.35766	1.44064	1.39842	1.56904
CG3940	0.234032	0.0183333	18	12	0.119748	5.6297	5.73707	5.57579	5.73953	5.8118	5.80958	5.82494	5.91971	5.48186	5.64462
miple	0.234032	0.0183333	24	3	0.119721	5.27578	5.2568	5.27872	5.20318	5.18911	5.10278	5.03424	5.08749	5.13712	5.0025
out	0.234032	0.0183333	18	3	0.119161	4.20906	4.37266	4.32886	4.26372	4.24915	4.1111	4.14443	4.05704	4.344	4.37826
CG8121	0.234032	0.0183333	18	9	0.11858	3.95287	3.98465	3.9086	4.25843	4.17004	4.04654	4.10287	4.01666	4.00067	4.14774
CG6196	0.234032	0.0183333	18	6	0.118363	3.21035	3.17276	3.16744	3.31228	3.41642	3.08586	3.07878	3.08343	3.3824	3.51113
CG13603	0.234032	0.0183333	18	9	0.117799	5.64685	5.58787	5.64306	5.85948	5.82729	5.72399	5.78035	5.7674	5.63663	5.7549
CR43259	0.234032	0.0183333	24	9	0.117566	2.08481	2.04508	2.05797	2.1788	2.13222	2.11676	2.14626	2.33822	1.87404	1.92324
CG6218	0.234032	0.0183333	24	0	0.117366	4.31878	4.40129	4.3433	4.23531	4.12304	4.20196	4.07056	4.07134	4.24284	4.20141
ari-2	0.234032	0.0183333	18	9	0.117334	3.80472	3.92562	3.84036	4.0932	4.08662	3.99955	3.95905	4.05508	4.05483	3.97721
CG4091	0.234032	0.0183333	18	6	0.116371	4.17491	4.34495	4.2611	4.41897	4.46695	4.16191	4.19442	4.24091	4.27173	4.3996
CG14521	0.234032	0.0183333	18	0	0.115805	2.49768	2.60793	2.51425	2.30234	2.35142	2.44322	2.42494	2.3276	2.44427	2.35638
foxo	0.234032	0.0183333	24	9	0.115243	5.47163	5.43868	5.42674	5.60228	5.54316	5.55929	5.576	5.5745	5.26646	5.24308
CG14005	0.234032	0.0183333	24	15	0.114558	3.30428	3.11593	3.30775	3.33025	3.25485	3.46975	3.47529	3.47454	3.40148	3.31493
Akt1	0.234032	0.0183333	18	6	0.114327	5.15623	5.0902	5.11037	5.36064	5.27214	5.05488	5.01711	5.01268	5.42201	5.34265
CG5857	0.234032	0.0183333	18	6	0.113601	2.66477	2.8602	2.7675	2.94835	2.95006	2.73036	2.75351	2.72504	2.94384	2.94021
CG10189	0.234032	0.0183333	18	6	0.112707	3.74697	3.82131	3.91507	3.94717	3.99399	3.70809	3.81615	3.64175	3.90313	3.8418
CG13077	0.234032	0.0183333	18	6	0.112612	3.10648	2.80995	3.13007	3.21875	3.18721	2.78369	3.03452	2.74537	3.14932	3.22338
CG3608	0.234032	0.0183333	24	21	0.112001	3.19112	3.23106	3.14279	3.08096	3.07266	3.14897	2.95098	3.09108	3.32455	3.42019
trem	0.234032	0.0183333	18	9	0.111826	2.20916	2.19407	2.20494	2.37022	2.36006	2.39695	2.35856	2.34171	2.2108	2.34704
gol	0.234032	0.0183333	24	12	0.111632	3.03423	2.92393	2.98637	3.23216	3.18597	3.1921	3.29232	3.30637	3.19805	3.16931
Mgat2	0.234032	0.0183333	18	12	0.110946	5.20338	5.19013	5.1752	5.16797	5.25936	5.35955	5.3256	5.37247	5.05504	5.092
uzip	0.234032	0.0183333	18	12	0.110748	5.0104	5.0808	5.10119	5.19682	5.19323	5.3114	5.19422	5.32624	5.01742	5.03347
CG5953	0.234032	0.0183333	18	6	0.109805	3.41058	3.27542	3.40561	3.66199	3.41638	3.25854	3.2395	3.26058	3.68988	3.47273
CG9836	0.234032	0.0183333	24	9	0.109715	10.11	10.0025	10.0204	10.2241	10.2278	10.1932	10.1615	10.1503	10.0178	10.0574
CG5044	0.234032	0.0183333	24	3	0.109382	5.72215	5.60746	5.58632	5.56183	5.60512	5.34659	5.50881	5.43163	5.53593	5.42392
Atf-2	0.234032	0.0183333	18	0	0.109212	3.80086	3.81797	3.72015	3.58639	3.56869	3.64677	3.5732	3.57969	3.71745	3.62441
Slimp	0.234032	0.0183333	18	9	0.109	3.6647	3.52499	3.58758	3.78029	3.89006	3.75645	3.64178	3.77632	3.62049	3.6325
pio	0.234032	0.0183333	24	9	0.108363	5.52839	5.56525	5.51474	5.74286	5.72553	5.63485	5.68164	5.64033	5.45084	5.60042
CG11138	0.234032	0.0183333	24	21	0.108303	3.51198	3.43768	3.37003	3.30987	3.25847	3.29356	3.30907	3.31811	3.54025	3.44914
fax	0.234032	0.0183333	24	6	0.107943	5.84665	5.79236	5.88934	5.94778	5.91601	5.73668	5.8445	5.72354	5.61848	5.74639
CG31150	0.234032	0.0183333	24	9	0.107497	4.77903	4.72728	4.75573	4.87931	4.88705	4.70915	4.81685	4.811	4.54854	4.47704
CG4164	0.234032	0.0183333	24	15	0.106792	4.01385	4.09173	4.08964	4.1601	4.26318	4.2718	4.35157	4.26348	4.19976	4.27874
Hydr2	0.234032	0.0183333	24	15	0.106723	4.39338	4.44822	4.47962	4.49231	4.55857	4.49579	4.74682	4.66224	4.56918	4.64324
CG9318	0.234032	0.0183333	18	9	0.105271	6.10474	6.14747	6.16322	6.33034	6.35582	6.2016	6.29907	6.25176	6.26606	6.21633
CG34324	0.234032	0.0183333	18	15	0.104431	12.9596	12.9293	12.8161	12.783	12.7042	12.9712	12.8823	13.0212	12.7549	12.7912
CG8738	0.234032	0.0183333	24	12	0.103998	4.27864	4.39852	4.48089	4.63747	4.51903	4.59094	4.67329	4.65128	4.5707	4.54757
St3	0.234032	0.0183333	18	3	0.103944	3.86859	3.84147	3.97173	3.82323	4.07277	3.79969	3.69223	3.76543	4.27216	4.12606
CG10376	0.234032	0.0183333	18	9	0.102284	4.17945	4.17833	4.23113	4.43188	4.42432	4.3199	4.27849	4.32354	4.27696	4.41429
CG32069	0.234032	0.0183333	18	6	0.10162	4.90314	4.77059	4.97755	4.99101	5.05905	4.89877	4.75647	4.73131	5.05306	4.97583
CG32452	0.234032	0.0183333	18	6	0.101496	2.21213	2.3371	2.31582	2.44433	2.47973	2.15136	2.30559	2.26967	2.32893	2.38273
CG31659	0.234032	0.0183333	24	6	0.101427	1.41827	1.52529	1.33109	1.37598	2.40312	1.32571	1.27286	1.32631	1.27483	1.26599
CG8646	0.234032	0.0183333	18	6	0.101297	1.82818	1.8478	1.66621	1.98489	1.94746	1.76934	1.76605	1.70454	1.8904	1.94027
CG10764	0.234032	0.0183333	18	9	0.100905	1.15984	1.21544	1.16256	1.60292	1.29152	1.27448	1.33677	1.35331	1.23097	1.17074
mib1	0.234032	0.0183333	18	3	0.100305	4.18052	4.20798	4.21971	4.33473	4.17779	4.06226	4.15809	4.02363	4.58428	4.56456
CG33145	0.234032	0.0183333	18	9	0.0999306	3.3889	3.38415	3.44885	3.61506	3.60808	3.50628	3.56075	3.48736	3.47748	3.56345
CG10307	0.234032	0.0183333	24	12	0.0996497	6.58394	6.5504	6.53423	6.59963	6.69133	6.74962	6.70821	6.72246	6.54681	6.61799
CG6674	0.234032	0.0183333	18	9	0.0996112	3.45807	3.54575	3.40697	3.67303	3.69305	3.59251	3.61835	3.53549	3.52384	3.56658
Ire1	0.234032	0.0183333	24	6	0.098739	4.46716	4.3931	4.43367	4.5418	4.4087	4.31912	4.28055	4.33925	4.30255	4.23407
CG4743	0.234032	0.0183333	24	21	0.098635	3.54124	3.52869	3.63794	3.37245	3.38011	3.54837	3.50965	3.50915	3.68786	3.59525
Cbs	0.234032	0.0183333	24	18	0.0984477	4.99004	4.81103	4.96484	4.95779	4.95959	5.007	5.06813	4.98433	5.23655	5.22609
Sp212	0.234032	0.0183333	24	6	0.0982016	4.13174	4.19459	4.21435	4.28936	4.21955	3.96931	4.16863	4.1803	3.89408	4.05572
CG5500	0.234032	0.0183333	18	15	0.0981188	5.76934	5.67888	5.69623	5.59684	5.49843	5.74803	5.79459	5.78493	5.57319	5.55583
bel	0.234032	0.0183333	24	15	0.097865	5.6027	5.59345	5.62663	5.61519	5.61391	5.71946	5.76503	5.79262	5.75286	5.68202
btsz	0.234032	0.0183333	24	18	0.096904	3.70832	3.7066	3.71489	3.67801	3.65149	3.81176	3.81977	3.84536	3.90826	3.8079
CG11221	0.234032	0.0183333	24	0	0.0949786	2.70289	2.56258	2.6065	2.42826	2.47962	2.49258	2.41585	2.41461	2.52304	2.57079
l(2)03709	0.234032	0.0183333	18	3	0.094618	5.79901	5.74024	5.91109	5.7685	5.81626	5.59663	5.69442	5.67048	6.1126	6.03866
CAHbeta	0.234032	0.0183333	24	12	0.0943273	4.07583	4.05514	4.12166	4.156	4.27405	4.16378	4.26299	4.27977	4.1045	4.12959
CG11665	0.234032	0.0183333	18	9	0.094118	5.15714	5.15147	5.16608	5.36257	5.36868	5.25322	5.23581	5.20819	5.25467	5.20001
Aph-4	0.234032	0.0183333	24	6	0.0937624	3.78532	3.86334	3.72976	3.73216	4.2137	3.70309	3.65272	3.70368	3.40014	3.66765
alpha-catenin-related	0.234032	0.0183333	24	6	0.0935502	2.65063	2.59947	2.50477	2.65433	2.66018	2.48441	2.52951	2.51833	2.49032	2.42191
CG1635	0.234032	0.0183333	18	6	0.0933581	4.87299	4.94687	4.92213	5.00836	5.04244	4.79795	4.82657	4.81133	4.9261	5.10217
RpL29	0.234032	0.0183333	24	0	0.0928792	9.3898	9.43078	9.51566	9.32486	9.35188	9.25845	9.31946	9.28809	9.36047	9.53076
Dif	0.234032	0.0183333	24	9	0.0928537	5.07866	5.07597	5.01705	5.25294	5.15582	5.14648	5.06346	5.14888	4.94723	5.01757
CG6321	0.234032	0.0183333	18	6	0.0921038	3.7062	3.77969	3.7911	3.87753	3.95403	3.58269	3.75338	3.77262	3.91698	3.84482
CG15715	0.234032	0.0183333	18	9	0.0919186	5.30541	5.32691	5.4433	5.48874	5.57994	5.49106	5.45172	5.45605	5.38045	5.41084
CG13924	0.234032	0.0183333	18	6	0.0911323	1.30545	1.39156	1.31495	1.47892	1.44722	1.20805	1.2464	1.32173	1.41541	1.47785
CG1545	0.234032	0.0183333	24	15	0.0909778	3.49382	3.43623	3.59578	3.54066	3.66167	3.68361	3.69382	3.71215	3.66705	3.5649
CG31344	0.234032	0.0183333	24	21	0.0907423	3.74572	3.8053	3.75754	3.67752	3.72723	3.6174	3.73401	3.69053	3.88137	4.1362
debcl	0.234032	0.0183333	18	3	0.090047	3.82006	4.00546	4.02666	3.93933	3.91091	3.78991	3.89532	3.73552	4.07654	4.15583
Pdcd4	0.234032	0.0183333	18	6	0.089193	5.44343	5.39011	5.4709	5.59826	5.53354	5.34746	5.39306	5.31772	5.50559	5.41499
spz3	0.234032	0.0183333	18	3	0.088621	2.48518	2.55974	2.62888	2.49044	2.44023	2.25135	2.43423	2.41955	2.50092	2.70729
hay	0.234032	0.0183333	18	6	0.0882869	3.1216	3.01666	3.14507	3.19199	3.26853	3.06574	3.05113	3.0108	3.20393	3.16646
CR43257	0.234032	0.0183333	18	6	0.0875416	1.7413	1.73368	1.69712	1.8422	1.80176	1.54366	1.54555	1.68387	1.68933	1.79082
Gap69C	0.234032	0.0183333	24	15	0.0871092	4.38495	4.42886	4.47592	4.56062	4.56432	4.63527	4.65295	4.57893	4.60532	4.55679
emb	0.234032	0.0183333	18	9	0.0870194	5.08058	5.09113	5.04049	5.33351	5.27398	5.17009	5.10961	5.13784	5.21824	5.09293
tgo	0.234032	0.0183333	24	9	0.0859453	3.72087	3.71212	3.74802	3.84669	3.83168	3.84782	3.73162	3.82968	3.59857	3.70808
CR12842	0.234032	0.0183333	24	15	0.0853075	1.59546	1.63611	1.60622	1.61435	1.65796	1.71611	1.72854	1.9605	1.77978	1.66623
CD98hc	0.234032	0.0183333	18	9	0.0850441	6.39552	6.41463	6.52821	6.59486	6.63102	6.5357	6.58852	6.53124	6.45669	6.54638
Papst2	0.234032	0.0183333	24	12	0.0845473	3.74652	3.72741	3.65465	3.82873	3.82617	3.79485	3.92496	3.91446	3.77953	3.74207
CG40045	0.234032	0.0183333	18	9	0.0843402	6.30616	6.23767	6.31086	6.48016	6.52177	6.35497	6.39389	6.34153	6.33846	6.41764
Cnb	0.234032	0.0183333	18	9	0.0837386	1.74161	1.80693	1.73673	1.95465	1.92566	1.83117	1.88078	1.82831	1.84463	1.78793
NiPp1	0.234032	0.0183333	18	6	0.0837271	2.93994	2.8622	2.96046	3.03248	3.11123	2.90242	2.85721	2.88412	2.99161	3.09234
CG7601	0.234032	0.0183333	18	3	0.0833361	4.23165	4.27286	4.3314	4.28749	4.15129	4.11035	4.13558	4.19966	4.34383	4.47714
CG11208	0.234032	0.0183333	24	18	0.0831374	4.51691	4.40033	4.46316	4.42216	4.50071	4.52818	4.53411	4.51771	4.68794	4.74411
CG5694	0.234032	0.0183333	18	6	0.08203	3.62854	3.62098	3.70162	3.82018	3.83892	3.61787	3.66064	3.58438	3.71165	3.66731
CG7158	0.234032	0.0183333	18	6	0.0816212	4.00968	3.94113	4.06446	4.10064	4.08074	3.89699	3.96052	3.9074	4.04716	4.02739
nvy	0.234032	0.0183333	18	15	0.0804905	2.67637	2.6877	2.72573	2.55035	2.64355	2.79133	2.85477	2.68567	2.63178	2.6452
CG17486	0.234032	0.0183333	24	9	0.0801633	5.47317	5.58243	5.47727	5.75626	5.71146	5.50501	5.55676	5.54414	5.43698	5.46315
CG6617	0.234032	0.0183333	24	15	0.0799851	4.97709	4.87572	4.95468	4.97018	5.02436	5.04405	5.10692	5.11053	4.97842	5.09791
Mcm5	0.234032	0.0183333	18	3	0.0796648	1.50295	1.47033	1.61344	1.43119	1.46905	1.35703	1.42462	1.35381	1.50754	1.49114
cnk	0.234032	0.0183333	18	9	0.0782711	3.48675	3.47878	3.48272	3.64887	3.56264	3.54137	3.59144	3.60682	3.55789	3.51503
Hsc70Cb	0.234032	0.0183333	24	18	0.0773242	5.43734	5.4799	5.45073	5.4396	5.45577	5.49259	5.55399	5.54291	5.62417	5.63262
CG13814	0.234032	0.0183333	24	6	0.075524	2.50022	2.41646	2.46136	2.51088	2.47199	2.40992	2.34522	2.44285	2.35391	2.30311
CG42524	0.234032	0.0183333	24	3	0.0752086	1.49674	1.46012	1.44838	1.44103	1.3693	1.29507	1.322	1.42344	1.35376	1.33477
CG15544	0.234032	0.0183333	24	12	0.074213	1.52935	1.64919	1.57918	1.6543	1.68081	1.75414	1.67976	1.78775	1.62198	1.63594
Brca2	0.234032	0.0183333	18	6	0.0739354	2.88765	2.84588	2.74435	2.94941	2.95148	2.77969	2.82762	2.80219	2.94916	2.93652
Cyp9f3Psi	0.234032	0.0183333	24	9	0.0737123	2.77884	2.85596	2.80235	3.01702	3.01717	2.88309	2.79603	2.81098	2.76743	2.76228
CG33056	0.234032	0.0183333	24	9	0.0734861	5.73724	5.7516	5.73902	5.85552	5.77564	5.76778	5.86057	5.80921	5.5468	5.69838
Takr99D	0.234032	0.0183333	24	6	0.0723017	2.26626	2.24677	2.36025	2.25511	2.2731	2.17092	2.20394	2.23379	2.109	2.12301
wda	0.234032	0.0183333	18	6	0.0715638	2.79992	2.86992	2.87285	2.95267	3.00418	2.8218	2.82583	2.78854	2.9118	2.96575
Hip1	0.234032	0.0183333	18	6	0.070239	3.24897	3.25682	3.18515	3.46048	3.50243	3.2249	3.19495	3.24385	3.38905	3.33915
AGO2	0.234032	0.0183333	18	6	0.0700347	6.66819	6.73341	6.74002	6.92428	6.94542	6.69196	6.71598	6.68229	6.81517	6.80078
CG2218	0.234032	0.0183333	24	15	0.0697639	4.50487	4.3944	4.5589	4.50638	4.59818	4.6231	4.61291	4.66921	4.60353	4.62898
CG7504	0.234032	0.0183333	24	6	0.0685491	1.78914	1.73192	1.67107	1.85696	1.83535	1.75424	1.6605	1.71994	1.65097	1.63498
CCKLR-17D3	0.234032	0.0183333	18	0	0.0670143	1.49509	1.49615	1.47054	1.36572	1.39188	1.40085	1.4401	1.37878	1.42835	1.4123
exd	0.234032	0.0183333	24	9	0.0667481	5.7539	5.75831	5.72404	5.87999	5.85648	5.78362	5.75671	5.8527	5.73293	5.72617
Efr	0.234032	0.0183333	24	12	0.0655537	4.95266	4.98969	4.90072	5.07212	5.02599	5.04822	5.14442	5.10148	5.02387	5.06557
mus309	0.234032	0.0183333	18	9	0.0649707	1.601	1.61261	1.60864	1.72675	1.76861	1.62224	1.63673	1.7001	1.64389	1.63387
CG8202	0.234032	0.0183333	18	9	0.0649495	3.03405	2.98649	3.01805	3.20885	3.15635	3.09693	3.044	3.04881	3.02385	3.07088
CG4733	0.234032	0.0183333	18	15	0.0647169	5.31491	5.34443	5.33323	5.21147	5.31502	5.44424	5.39234	5.47557	5.21922	5.25176
Pgk	0.234032	0.0183333	18	15	0.0645249	8.32226	8.32231	8.39091	8.21219	8.18019	8.37247	8.3428	8.35633	8.21328	8.29454
CG14476	0.234032	0.0183333	24	9	0.0645072	6.28649	6.3571	6.34988	6.37772	6.45169	6.41592	6.42179	6.37538	6.25378	6.344
Nacalpha	0.234032	0.0183333	18	3	0.0641052	8.16131	8.27324	8.24651	8.22119	8.21071	8.07562	8.09771	8.18866	8.30275	8.31676
CG9044	0.234032	0.0183333	18	6	0.0637658	5.11874	5.05271	5.07461	5.2048	5.16891	5.07142	4.99169	5.04424	5.37947	5.12214
CG11779	0.234032	0.0183333	24	0	0.0635194	5.19358	5.12243	5.17708	5.11437	5.08274	5.04187	5.0166	5.08725	5.16685	5.13378
put	0.234032	0.0183333	18	6	0.0628954	4.63488	4.62942	4.61075	4.73181	4.75439	4.58519	4.55727	4.60129	4.74403	4.62768
mRpL28	0.234032	0.0183333	24	21	0.062516	5.94826	5.88978	6.03488	5.87423	5.85547	5.89035	5.86684	5.88133	5.95525	6.09536
CG13384	0.234032	0.0183333	18	6	0.0623451	4.32522	4.24765	4.27818	4.32749	4.36723	4.22773	4.21854	4.18231	4.38504	4.3387
comm	0.234032	0.0183333	24	21	0.0623322	2.62099	2.53565	2.55591	2.45236	2.46776	2.47542	2.47169	2.53041	2.53931	2.61282
Nca	0.234032	0.0183333	24	6	0.0621547	5.40494	5.48789	5.45318	5.5265	5.5166	5.43464	5.39588	5.4846	5.3367	5.35538
Elo68alpha	0.234032	0.0183333	24	12	0.0603848	1.12685	1.15194	1.09428	1.20653	1.14808	1.23747	1.23734	1.29701	1.13197	1.19135
CG9220	0.234032	0.0183333	24	0	0.0601946	3.54775	3.55865	3.5951	3.49201	3.51119	3.43136	3.51095	3.40903	3.57714	3.54652
DLP	0.234032	0.0183333	18	6	0.0601037	3.65158	3.60647	3.55785	3.70997	3.68336	3.60045	3.5534	3.52363	3.64188	3.62856
CG13870	0.234032	0.0183333	18	9	0.059829	1.113	1.05952	1.0974	1.22169	1.16322	1.18162	1.198	1.12485	1.11993	1.15896
vg	0.234032	0.0183333	24	12	0.0592831	3.73984	3.84622	3.90401	3.94018	4.00255	3.9843	3.98785	4.01541	3.96418	3.9384
CG17027	0.234032	0.0183333	18	12	0.058843	3.50451	3.65002	3.66159	3.6819	3.7841	3.73902	3.87771	3.70921	3.49686	3.5227
CG3259	0.234032	0.0183333	18	6	0.0586775	1.45818	1.42093	1.44415	1.51811	1.5911	1.37366	1.38493	1.48888	1.51209	1.50581
Tsp3A	0.234032	0.0183333	18	3	0.0579326	2.54051	2.64079	2.6102	2.53288	2.60027	2.42135	2.53908	2.51804	2.68486	2.63022
CG11357	0.234032	0.0183333	18	12	0.0571448	3.56658	3.75926	3.71211	3.72921	3.75788	3.7616	3.80148	3.85998	3.49548	3.61706
CG6903	0.234032	0.0183333	18	9	0.0571123	5.39951	5.28722	5.42809	5.48085	5.53731	5.45333	5.48938	5.45939	5.33266	5.43517
Ime4	0.234032	0.0183333	18	3	0.0567337	3.56521	3.4922	3.5667	3.41507	3.36087	3.53756	3.3591	3.27494	3.73588	3.61067
polo	0.234032	0.0183333	18	9	0.0564077	1.13629	1.21781	1.2176	1.29789	1.33594	1.24225	1.27449	1.25128	1.28939	1.23037
CG16779	0.234032	0.0183333	18	12	0.0562829	3.68831	3.681	3.40601	3.74562	3.6878	3.82661	3.76765	3.72574	3.63235	3.26787
Tsp42Ej	0.234032	0.0183333	18	15	0.0557927	5.88728	5.89956	5.92298	5.81209	5.81213	5.93645	5.98249	5.91247	5.67552	5.83879
Syx7	0.234032	0.0183333	18	9	0.0557221	5.8529	5.87698	5.9661	6.0154	6.02198	5.99763	5.97409	6.01606	5.91268	5.98158
CG6540	0.234032	0.0183333	24	18	0.0549733	2.21119	2.27627	2.26233	2.20505	2.23576	2.28008	2.31124	2.33299	2.38144	2.3011
CG9140	0.234032	0.0183333	18	12	0.0534007	10.4432	10.3632	10.3965	10.4259	10.4568	10.5867	10.4593	10.4971	10.424	10.295
Sirt7	0.234032	0.0183333	18	6	0.0533998	2.02546	1.94817	2.04541	2.10717	2.06191	1.94713	1.93396	1.99311	2.07205	2.08509
CG9426	0.234032	0.0183333	18	9	0.0530468	3.74095	3.74875	3.71524	3.86705	3.81718	3.77829	3.76328	3.84587	3.76312	3.71921
S1P	0.234032	0.0183333	18	9	0.0524143	2.50382	2.55046	2.53274	2.64588	2.70525	2.56786	2.58783	2.5561	2.55357	2.50064
CAP-D2	0.234032	0.0183333	18	9	0.0523172	1.47053	1.54203	1.60458	1.65665	1.65881	1.6222	1.59748	1.6388	1.5684	1.58947
CG17168	0.234032	0.0183333	18	6	0.0523033	4.1871	4.17538	4.20477	4.24934	4.31713	4.1516	4.14341	4.1492	4.32531	4.31662
CG33191	0.234032	0.0183333	18	3	0.0520208	1.29037	1.31323	1.36367	1.31441	1.25337	1.23762	1.2417	1.21798	1.37598	1.33118
tan	0.234032	0.0183333	18	6	0.0515148	2.90576	2.90236	2.87453	2.96156	3.08098	2.87818	2.89922	2.75703	2.95765	2.96399
CG43163	0.234032	0.0183333	18	6	0.0513671	1.89872	1.93594	1.9606	2.0408	2.00482	1.9326	1.84784	1.89898	1.9781	2.0193
Dad	0.234032	0.0183333	18	6	0.0510262	4.73122	4.73165	4.74578	4.7563	4.79882	4.54094	4.67352	4.62941	4.89067	4.79433
RAF2	0.234032	0.0183333	18	6	0.050032	2.86636	2.87714	2.75239	2.92668	2.93417	2.83134	2.81658	2.83889	2.89991	2.88761
CG4858	0.234032	0.0183333	18	6	0.0493179	5.33846	5.27931	5.2924	5.41472	5.46863	5.26923	5.29033	5.29042	5.39834	5.33552
Ube3a	0.234032	0.0183333	18	6	0.0480203	3.7526	3.78878	3.80545	3.86606	3.86309	3.75186	3.74248	3.76098	3.83547	3.89294
CG9776	0.234032	0.0183333	18	6	0.0455449	4.36137	4.39628	4.42081	4.44002	4.50081	4.38267	4.36108	4.35585	4.47346	4.46351
CG41320	0.234032	0.0183333	24	12	0.0455193	1.16551	1.09566	1.17	1.2308	1.17464	1.22115	1.23954	1.37719	1.20815	1.16812
Eip63E	0.234032	0.0183333	18	6	0.0434462	3.53265	3.49307	3.51814	3.57379	3.62232	3.48572	3.44973	3.51336	3.64334	3.54281
eIF3-S10	0.234032	0.0183333	18	3	0.0432809	5.94363	5.95746	6.02987	5.9618	5.93967	5.90401	5.88467	5.89399	6.01215	6.03628
Cnot4	0.234032	0.0183333	24	9	0.0429624	5.70823	5.75309	5.73405	5.84725	5.78987	5.75877	5.68413	5.76443	5.65695	5.66598
CG11448	0.234032	0.0183333	18	6	0.0415418	5.22751	5.23322	5.23544	5.29225	5.29391	5.20615	5.18701	5.19685	5.29379	5.33176
RpL14	0.234032	0.0183333	24	21	0.0408814	9.88642	9.89964	9.99739	9.87714	9.82861	9.85735	9.87839	9.87137	9.91474	10.0132
mael	0.234032	0.0183333	18	12	0.0392133	1.31906	1.29437	1.32462	1.35952	1.31488	1.3642	1.37648	1.41761	1.25727	1.30806
CG12179	0.234032	0.0183333	18	9	0.0374795	1.49577	1.52189	1.48658	1.6391	1.55577	1.52669	1.55131	1.54634	1.52956	1.48977
DIP1	0.234032	0.0183333	18	3	0.0372553	5.83904	5.88017	5.85449	5.78157	5.80923	5.78794	5.74833	5.79975	5.87199	5.90262
CG9067	0.234032	0.0183333	18	3	0.0371535	4.06022	3.9467	3.95871	3.95647	3.91614	3.88335	3.91301	3.89932	3.97046	4.03127
CRMP	0.234032	0.0183333	24	15	0.0369888	4.21763	4.21606	4.23673	4.23375	4.2231	4.27541	4.33618	4.33206	4.26447	4.23455
sn	0.234032	0.0183333	18	12	0.0368562	2.30654	2.37163	2.32574	2.43812	2.4441	2.3478	2.55783	2.45245	2.25853	2.27975
sbr	0.234032	0.0183333	24	9	0.0361155	5.03302	5.09383	5.04618	5.1338	5.11694	5.04706	5.04854	5.04841	4.97937	4.99747
dup	0.234032	0.0183333	18	3	0.0360016	1.73171	1.76782	1.77007	1.72177	1.74983	1.67659	1.73858	1.66302	1.78667	1.79825
CG11399	0.234032	0.0183333	18	6	0.0358805	3.77923	3.78363	3.76894	3.82106	3.82513	3.74217	3.62367	3.75149	3.76148	3.81525
CG7852	0.234032	0.0183333	24	15	0.0358241	4.7413	4.75315	4.70519	4.78346	4.75324	4.80655	4.77294	4.85251	4.79205	4.76999
HdacX	0.234032	0.0183333	18	6	0.0348941	2.94765	2.98266	2.97664	3.09499	3.02353	2.93504	2.96133	2.96226	3.02031	3.04699
snama	0.234032	0.0183333	18	6	0.0347285	3.49334	3.49124	3.51116	3.54141	3.54856	3.44353	3.45641	3.49035	3.55181	3.49515
Tpr2	0.234032	0.0183333	18	3	0.0345335	6.59616	6.59289	6.61861	6.55172	6.58977	6.50023	6.56005	6.54135	6.63718	6.59293
Egfr	0.234032	0.0183333	18	15	0.0316727	4.89492	4.9031	4.87349	4.81867	4.86176	4.91078	4.93498	4.93001	4.8388	4.74823
RpS23	0.234032	0.0183333	24	21	0.0315744	9.75553	9.77479	9.84534	9.74767	9.7169	9.74678	9.75961	9.7555	9.79143	9.89132
CG1317	0.234032	0.0183333	24	9	0.027737	5.82893	5.84895	5.84572	5.94767	5.87528	5.86146	5.8707	5.8816	5.84695	5.7949
CG30001	0.234032	0.0183333	18	6	0.0259505	1.25399	1.24193	1.31037	1.42108	1.27002	1.23008	1.23726	1.21575	1.37321	1.36015
CG14258	0.234032	0.0183333	24	15	0.0257408	1.07672	1.0545	1.04979	1.08764	1.10066	1.14057	1.10578	1.11624	1.08713	1.10847
slou	0.234032	0.0183333	24	21	0.0250132	1.80283	1.81537	1.78712	1.78664	1.76643	1.79642	1.78139	1.78	1.88019	1.89662
Ser	0.234032	0.0183333	18	12	0.0230248	1.48196	1.45668	1.48821	1.48289	1.48413	1.48708	1.52089	1.52406	1.34571	1.4351
CG7611	0.234032	0.0183333	18	3	0.0212961	5.06917	5.08601	5.11459	5.09365	5.06956	5.06633	5.00028	5.06191	5.14836	5.175
CG6191	0.311587	0.0297222	24	3	0.0742872	5.26622	5.27882	5.18234	5.17134	5.18234	5.08038	5.04013	5.11367	5.19293	5.15723
CG18609	0.311587	0.0411111	24	0	1.59425	5.35509	5.42445	3.61535	2.56552	3.10048	1.53131	3.21192	2.37622	5.21916	4.28798
CG13309	0.311587	0.0411111	24	21	1.43434	3.93998	5.82096	5.54667	3.37008	3.77443	3.9538	3.89256	3.17884	5.98248	5.67282
CheB42a	0.311587	0.0411111	18	6	1.28297	5.22215	3.33185	3.44056	5.66894	5.2659	3.82461	2.94348	3.14342	4.6964	5.21614
CG5945	0.311587	0.0411111	24	3	0.918965	9.31608	9.22996	8.96767	9.21657	8.56898	7.68997	7.7178	7.91695	7.64656	8.15854
Smvt	0.311587	0.0411111	24	0	0.888388	2.85929	3.81772	3.28438	1.60894	2.95367	1.24485	1.8709	1.57196	2.70567	2.50122
CG12483	0.311587	0.0411111	18	6	0.885059	2.58649	1.96975	3.17117	4.28165	4.02916	2.28324	1.86926	2.60956	3.12986	3.72373
CG18302	0.311587	0.0411111	24	15	0.879364	2.11807	2.10566	1.97388	2.73843	2.39867	3.39657	3.34927	3.44901	3.67811	3.39369
CheB98a	0.311587	0.0411111	18	6	0.86572	3.01574	1.80817	2.04902	3.56908	3.29008	2.19928	1.54399	1.70294	2.86429	3.43803
CG13428	0.311587	0.0411111	18	6	0.80015	8.74297	7.89898	7.56049	9.61065	8.87515	7.74682	6.96496	7.65578	8.16204	8.99056
CheA46a	0.311587	0.0411111	18	6	0.754356	2.47193	1.33324	1.52054	2.7883	2.60038	1.68903	1.40928	1.3329	2.35315	2.49326
TotC	0.311587	0.0411111	18	0	0.668372	11.6628	10.4866	11.41	9.24891	10.0421	10.1119	10.7646	10.4103	10.9748	10.4042
CG14277	0.311587	0.0411111	18	6	0.635252	4.21695	3.6181	3.38536	5.26312	4.4333	3.48666	2.97359	3.42242	3.78285	4.53504
CG14502	0.311587	0.0411111	18	6	0.633716	3.29817	2.8149	2.35924	4.1126	3.57471	2.51839	1.98902	2.47573	3.02484	3.59953
CG33965	0.311587	0.0411111	18	0	0.619977	2.60899	2.54949	2.17648	1.53954	1.31345	1.48068	1.48456	1.58676	2.33172	2.39091
CG9519	0.311587	0.0411111	24	6	0.557121	2.92155	3.10033	2.40818	4.0007	3.11056	2.31244	1.91066	2.64944	1.85223	2.62975
CheB42b	0.311587	0.0411111	18	6	0.55286	4.44048	4.34352	3.74659	5.43709	4.53803	3.65492	3.12299	4.0119	4.14132	5.0338
CheA86a	0.311587	0.0411111	18	6	0.55023	2.05599	1.21192	1.26727	2.04756	1.98355	1.14136	1.0933	1.20756	1.72205	1.57891
lectin-33A	0.311587	0.0411111	24	9	0.521153	2.78427	2.69477	2.654	3.62225	3.44106	3.36082	3.50807	3.26193	2.35226	2.91667
proPO-A1	0.311587	0.0411111	24	9	0.501833	4.29147	4.55821	4.68433	5.26791	4.9211	5.33195	4.62936	4.96241	3.24284	3.94299
CG31326	0.311587	0.0411111	24	3	0.495423	6.5521	6.54754	6.66429	6.30134	6.33153	5.81708	5.94595	5.82324	5.84075	5.80224
CG15093	0.311587	0.0411111	24	3	0.486867	6.41661	6.52205	6.47389	5.71812	5.77582	5.44768	5.74477	5.37484	5.57174	5.41293
ple	0.311587	0.0411111	24	3	0.478404	5.70406	5.77882	5.67217	5.60053	5.3403	5.09066	4.9689	4.98826	4.85756	4.99561
salt	0.311587	0.0411111	18	0	0.478063	3.2316	4.11292	4.01992	2.83624	2.83455	2.9847	3.21221	2.78322	3.88964	3.04636
CG9459	0.311587	0.0411111	18	3	0.447884	3.62322	3.56567	2.66773	2.37111	2.83572	1.75571	3.02143	2.18431	3.95861	3.80816
CG33127	0.311587	0.0411111	24	0	0.444144	5.3428	5.46324	5.69857	4.74566	5.17014	4.80308	4.82733	4.56312	5.39337	5.38557
CG34291	0.311587	0.0411111	24	21	0.429418	7.15459	7.22601	7.25978	6.03827	7.04685	6.51658	7.12387	6.58354	7.63769	7.19954
Pepck	0.311587	0.0411111	24	15	0.421685	7.85517	8.41689	8.6271	9.02621	8.42692	9.24017	9.02327	9.31006	8.99702	8.68659
CG15199	0.311587	0.0411111	24	21	0.41529	6.7536	6.99466	7.25963	6.76881	6.56795	6.66611	6.67232	6.96138	7.84779	7.79588
CG10184	0.311587	0.0411111	24	3	0.40992	5.86773	5.67375	5.61529	5.1387	5.29649	4.86798	5.37852	4.85374	4.94975	4.99803
SpdS	0.311587	0.0411111	24	18	0.401142	3.80211	3.83204	3.99777	4.23107	3.75879	4.09719	4.36802	4.39934	5.11703	4.60248
PO45	0.311587	0.0411111	24	9	0.397879	4.31784	4.43408	4.55572	4.85338	4.63703	5.09368	4.4588	4.72143	3.37005	3.81567
CG31272	0.311587	0.0411111	18	3	0.388882	2.18913	2.88322	2.98367	2.20846	2.84814	2.16115	2.32271	2.09537	3.25075	3.08113
Mdr50	0.311587	0.0411111	24	3	0.386498	3.13633	3.26932	3.13581	2.72108	3.2129	2.57979	2.45571	2.42624	2.8655	2.92081
CG31104	0.311587	0.0411111	24	21	0.382065	6.53963	6.66173	6.37181	6.05663	5.37369	6.08214	5.87678	6.15228	6.62475	6.4171
Cyp6a23	0.311587	0.0411111	24	6	0.380727	6.36082	6.87308	6.79603	6.49192	7.14891	5.98905	6.25761	6.2891	6.12223	6.19825
CG31207	0.311587	0.0411111	24	3	0.379437	6.31977	6.14016	6.36774	6.31116	6.10946	5.53017	5.86526	5.63817	5.60355	5.82461
CG43630	0.311587	0.0411111	18	3	0.369929	3.73043	3.6506	3.00907	3.03479	3.54655	1.90173	3.36649	2.76956	4.2603	3.81599
CG18538	0.311587	0.0411111	18	6	0.36946	2.63525	2.7606	2.30986	3.51524	2.75925	2.16141	1.80661	2.24915	2.56647	3.03206
CG42246	0.311587	0.0411111	24	12	0.366538	4.71502	4.55516	4.74692	5.21605	5.14138	5.27826	5.23577	5.15436	4.52852	4.98765
Jon65Aiv	0.311587	0.0411111	18	12	0.335999	10.7827	11.0034	10.6391	10.9878	10.6114	11.2865	11.1004	11.5148	10.522	10.3068
Rfabg	0.311587	0.0411111	24	12	0.335943	8.90864	8.75131	8.59932	9.10246	9.27233	9.22641	9.32603	9.21591	9.10131	8.60091
CG30090	0.311587	0.0411111	24	12	0.335024	3.23134	2.90076	2.88583	3.10042	3.51292	3.53325	3.65288	3.57973	3.17593	3.05946
GRHR	0.311587	0.0411111	18	9	0.331641	4.73487	4.69854	4.84733	5.22688	5.26478	5.26011	4.9913	5.29209	4.93351	4.83503
CG15096	0.311587	0.0411111	18	0	0.330081	7.24244	7.47715	7.58112	6.77164	6.85764	6.90415	7.10833	7.25439	6.94042	7.14862
dro5	0.311587	0.0411111	24	9	0.324788	6.98465	6.40786	6.59954	7.36835	7.18962	6.84118	6.71572	6.89058	6.11635	6.52533
Sodh-2	0.311587	0.0411111	18	12	0.32406	5.79122	5.97483	6.09518	6.11275	6.08665	6.55165	6.55531	6.41086	5.90517	5.98296
shf	0.311587	0.0411111	18	9	0.320614	4.08261	3.79597	4.32054	4.56219	4.87213	4.43426	4.55874	4.5187	4.35706	4.62907
CG31324	0.311587	0.0411111	24	15	0.316676	2.98393	3.25726	3.32683	3.25547	3.6262	3.77646	3.87865	3.88708	3.42886	3.54491
CG11619	0.311587	0.0411111	18	9	0.312453	1.78779	1.87643	1.71618	2.36709	2.20951	2.15925	2.31645	2.27975	2.2402	2.12927
CG10918	0.311587	0.0411111	24	21	0.309525	3.17034	3.5813	3.06417	2.7856	2.82948	3.25325	2.807	3.16605	3.64024	4.49481
CG7402	0.311587	0.0411111	24	6	0.298096	2.85246	2.61805	2.52989	3.12987	2.72892	2.39192	2.62992	2.60516	1.9922	2.1164
CG1791	0.311587	0.0411111	24	3	0.291576	4.52586	4.53043	4.58568	4.55695	4.41584	4.11883	4.107	4.12438	4.11351	4.14568
CG3775	0.311587	0.0411111	24	12	0.282883	4.99135	5.16768	5.20438	5.12038	5.5796	5.74692	5.68509	5.64352	5.27919	5.37249
Fmo-1	0.311587	0.0411111	24	0	0.279087	3.71832	3.56718	3.75899	3.28044	3.32571	3.28995	3.20609	3.28714	3.52833	3.72249
CG5853	0.311587	0.0411111	24	18	0.277505	5.47892	5.33896	5.52995	5.10957	4.7814	5.36958	5.37767	5.54492	5.89866	5.95476
CG8034	0.311587	0.0411111	24	21	0.277418	4.08234	4.34375	4.36413	4.14717	3.94754	3.95143	4.21719	3.94868	5.05238	4.48148
CG12493	0.311587	0.0411111	24	9	0.274469	3.24297	3.17982	3.20049	3.58962	3.69942	3.46185	3.55642	3.60932	3.27646	3.03992
plx	0.311587	0.0411111	24	0	0.274369	5.63153	5.60351	5.24396	5.2155	4.95519	5.00709	4.91525	5.17847	5.43523	5.31563
CG12075	0.311587	0.0411111	24	3	0.273839	3.40715	3.3881	3.32402	3.13306	3.14581	2.98401	2.93038	2.90568	2.83366	2.93675
CG14329	0.311587	0.0411111	24	6	0.27316	1.51095	1.67162	1.66434	1.79994	1.76313	1.41716	1.24724	1.24278	1.26781	1.37682
Cyp4e2	0.311587	0.0411111	18	3	0.266089	6.07932	6.26839	6.11745	6.14398	5.89221	5.67247	5.81558	5.67771	6.23691	6.19271
CG9360	0.311587	0.0411111	24	0	0.263548	5.90399	6.27266	5.77242	5.72625	5.41207	5.47167	5.33931	5.48267	5.77907	5.79251
CG9436	0.311587	0.0411111	18	12	0.262752	5.58008	5.63126	5.56435	5.52122	5.72472	5.99389	5.95993	5.9438	5.39545	5.52516
CG4115	0.311587	0.0411111	18	0	0.261683	2.85866	2.86793	2.98709	2.17613	2.52789	2.81031	2.39668	2.648	2.52604	2.82471
fon	0.311587	0.0411111	24	3	0.259883	7.96595	7.83083	8.06784	7.4157	7.4573	7.23218	7.4633	7.23213	7.36338	7.41111
stl	0.311587	0.0411111	24	18	0.25975	1.66682	1.6394	1.75732	1.95397	1.53649	1.97857	1.88188	2.08242	2.23507	2.16033
CG6870	0.311587	0.0411111	18	15	0.249371	3.44693	3.32039	3.65346	3.01806	2.88887	3.62788	3.46685	3.53163	3.3727	3.08808
CG8665	0.311587	0.0411111	24	9	0.24801	5.59831	5.97192	5.77	6.20568	6.06197	5.7419	6.19814	5.79242	5.56782	5.39116
CG1887	0.311587	0.0411111	24	3	0.247792	4.91069	4.92633	4.89148	4.74527	4.85278	4.64482	4.34491	4.56026	4.52883	4.52962
Tsp42Eh	0.311587	0.0411111	24	15	0.247046	4.74021	4.87605	4.69586	4.87871	4.94531	5.0575	5.08959	5.26394	5.0803	5.34525
alphaTry	0.311587	0.0411111	18	12	0.24703	10.991	11.2284	10.9762	11.3139	11.0374	11.5695	11.3283	11.5983	11.0586	10.8454
GstD9	0.311587	0.0411111	18	9	0.245912	7.47756	7.59586	7.1355	7.75144	8.00063	7.9377	7.83126	7.65725	7.61106	7.3422
CG10638	0.311587	0.0411111	18	9	0.244593	5.14435	5.14528	5.26493	5.74975	5.7584	5.50571	5.34833	5.3969	5.45302	5.49309
Cyp12c1	0.311587	0.0411111	18	9	0.244307	5.81548	6.34026	6.47759	6.77493	6.89125	6.69845	6.55624	6.6097	6.72035	6.60636
Cyp12a4	0.311587	0.0411111	18	9	0.242407	6.78861	6.93943	7.02708	7.40825	7.44974	7.2439	7.12644	7.21147	7.1385	7.2738
CG31869	0.311587	0.0411111	18	3	0.240299	3.57959	3.58087	3.74231	3.62677	3.56164	3.30491	3.26897	3.1534	3.64091	3.73581
CG17839	0.311587	0.0411111	18	12	0.239784	5.77549	5.72291	5.64461	6.01743	5.72046	6.09178	6.00935	6.13795	5.71928	5.62379
CG6836	0.311587	0.0411111	24	3	0.239507	4.1801	4.24247	4.14524	4.19193	4.20194	3.79947	3.84023	3.80269	3.91936	4.0244
snoRNA:SC35-a	0.311587	0.0411111	24	3	0.237362	2.03231	1.6268	1.81412	1.6542	1.46288	1.46833	1.26196	1.31852	1.37106	1.44111
CG11592	0.311587	0.0411111	24	9	0.236765	2.57949	2.36098	2.42058	2.87957	2.69581	2.65224	3.25512	2.63069	1.96218	2.5026
scaRNA:mgU4-65	0.311587	0.0411111	24	3	0.235061	1.89681	1.61379	1.26486	1.30991	1.54677	1.21434	1.06834	1.11137	1.28021	1.13696
CG31793	0.311587	0.0411111	24	0	0.234388	4.40116	4.44515	4.56317	4.11368	4.10176	3.84742	4.01801	4.00405	4.24122	3.94133
CG31664	0.311587	0.0411111	24	12	0.233196	4.6762	4.43304	4.52293	4.74358	4.82521	4.76395	5.03749	4.98316	4.57845	4.49542
CAH1	0.311587	0.0411111	18	0	0.232712	7.35092	7.54985	7.56507	7.07471	7.17352	7.22765	7.10368	7.05019	7.29618	7.45191
CG17279	0.311587	0.0411111	24	3	0.232395	2.15516	1.88191	1.99855	1.63529	1.70408	1.45961	1.4847	1.8265	1.53081	1.6039
CG42369	0.311587	0.0411111	18	12	0.228525	7.49644	7.42769	7.36701	7.52681	7.70037	7.80736	7.76314	7.89893	7.28003	7.57727
CG6746	0.311587	0.0411111	24	21	0.227589	6.17637	6.25083	6.04231	5.85452	5.94838	5.74104	6.00313	5.87659	6.2158	6.3
CG12868	0.311587	0.0411111	18	9	0.227023	6.33355	6.38369	6.66279	6.97403	6.92283	6.71814	6.71457	6.67684	6.69427	6.86244
CG7149	0.311587	0.0411111	24	3	0.225498	4.1448	4.25973	4.2416	4.07472	4.12884	3.90015	3.91511	3.79339	3.86967	3.81593
ebd2	0.311587	0.0411111	18	6	0.224736	1.88738	1.85795	2.16031	2.23482	2.26168	1.87726	1.91668	1.7944	2.15644	2.18526
CG31997	0.311587	0.0411111	18	9	0.222867	6.20484	6.33285	6.31322	6.78938	6.71428	6.48602	6.53185	6.531	6.50413	6.62465
CG31300	0.311587	0.0411111	24	3	0.222759	5.63079	5.64095	5.60955	5.3414	5.20953	5.18456	5.18178	5.19051	5.11005	5.25772
CG17352	0.311587	0.0411111	24	0	0.221211	1.88972	1.97533	2.22671	1.66473	1.79285	1.60158	1.75111	1.63735	2.11087	1.90846
CG32694	0.311587	0.0411111	24	3	0.21591	4.41576	4.40994	4.31483	4.50089	4.32655	3.98529	4.01911	4.09461	4.19097	4.31046
Cct2	0.311587	0.0411111	24	6	0.215786	4.47512	4.64623	4.69359	4.86506	5.00826	4.65909	4.55989	4.5916	4.0297	4.26861
CG11334	0.311587	0.0411111	24	18	0.21207	5.07123	5.11837	5.18176	5.114	5.21387	5.329	5.41392	5.35416	5.6052	5.61158
Drak	0.311587	0.0411111	24	3	0.211889	4.38439	4.41513	4.37856	4.24813	4.1637	4.08581	4.01041	4.00401	4.07071	3.99639
GstE5	0.311587	0.0411111	24	3	0.211644	4.26658	4.40085	4.29506	4.33068	4.37825	3.95425	3.99069	3.96981	4.10154	4.22832
yellow-h	0.311587	0.0411111	24	9	0.211169	3.05713	3.08806	2.98406	3.51533	3.36109	3.35577	2.98408	3.15034	2.79591	3.04542
ATPCL	0.311587	0.0411111	24	3	0.211092	6.56485	6.70719	6.68256	6.46218	6.587	6.19235	6.43916	6.28847	6.23222	6.34117
CG42866	0.311587	0.0411111	24	3	0.210024	1.38435	1.46334	1.55685	1.47402	1.36427	1.08733	1.07956	1.24803	1.35432	1.0816
Tsp42Ee	0.311587	0.0411111	18	9	0.208465	7.32755	7.36058	7.49755	7.77847	7.86574	7.58943	7.66422	7.64657	7.41412	7.74379
Hml	0.311587	0.0411111	24	9	0.20771	4.98741	5.1115	4.84178	5.34259	5.13042	5.03218	4.97149	5.13553	3.99809	4.54472
Nplp2	0.311587	0.0411111	24	9	0.20714	12.5437	12.6546	12.6969	12.6855	12.9827	12.8366	12.9024	12.866	12.4791	12.5069
Jheh1	0.311587	0.0411111	24	3	0.207019	6.01065	6.42638	6.08758	6.12292	5.78648	5.74074	5.70039	5.71788	5.91579	5.96998
Karl	0.311587	0.0411111	24	9	0.206457	4.10434	4.28944	4.20219	4.39632	4.59962	4.24444	4.50798	4.40791	3.67892	4.17772
lectin-24Db	0.311587	0.0411111	24	9	0.204363	4.2096	4.2891	4.45853	4.49173	4.75528	4.48898	4.54442	4.5806	3.53944	4.29159
daw	0.311587	0.0411111	18	12	0.203955	4.86429	5.12027	4.7826	5.06725	4.92069	5.45616	5.04657	5.351	4.37331	4.45528
CG6310	0.311587	0.0411111	18	12	0.199514	3.64609	3.70487	3.85521	3.8888	4.08158	3.99736	4.1983	4.07899	3.36804	3.8406
CG10562	0.311587	0.0411111	24	3	0.199361	5.00399	5.25682	5.28741	5.04045	5.04952	4.72205	4.90977	4.86482	4.79172	4.96028
CG32103	0.311587	0.0411111	18	9	0.198624	4.94572	4.97794	5.05912	5.37618	5.27924	5.25372	5.24279	5.23996	5.34515	5.10085
CG6206	0.311587	0.0411111	24	9	0.198409	6.13355	6.10111	6.25984	6.47435	6.53849	6.32284	6.61342	6.29955	6.21739	6.09822
nes	0.311587	0.0411111	24	3	0.197353	5.32562	5.34681	5.4623	5.1839	5.27109	5.02036	5.08942	5.04293	5.06771	4.97425
CG31445	0.311587	0.0411111	24	6	0.19605	5.29198	5.18322	5.34073	5.20752	5.21518	5.00706	5.03912	5.01067	4.84164	4.93749
Hmgs	0.311587	0.0411111	18	0	0.192966	5.75912	5.71199	5.79586	5.38544	5.57108	5.45331	5.46459	5.47765	5.57205	5.75493
CG5397	0.311587	0.0411111	24	12	0.190994	4.849	5.23364	5.15457	5.23716	5.29607	5.40773	5.37079	5.57384	4.85823	5.30374
hgo	0.311587	0.0411111	24	9	0.190399	5.98139	6.01256	6.22064	6.5123	6.13055	6.03593	6.34012	6.07086	5.77106	5.76754
wbl	0.311587	0.0411111	18	6	0.189134	1.62657	1.51689	1.72681	1.91413	1.87191	1.46406	1.54295	1.39869	1.66946	1.61811
Jheh3	0.311587	0.0411111	18	9	0.186285	5.9694	6.06893	5.86144	6.24496	6.32027	6.45019	6.20896	6.08494	6.16077	6.09958
CG33177	0.311587	0.0411111	24	3	0.185944	1.79267	1.44138	1.5255	1.53393	1.29828	1.26253	1.22184	1.16992	1.28995	1.50465
CG31810	0.311587	0.0411111	18	3	0.183065	2.56399	2.88304	2.90068	2.81023	2.88826	2.56168	2.64531	2.31886	3.04789	2.95795
CG5079	0.311587	0.0411111	18	0	0.182914	1.87791	1.84507	1.6549	1.42392	1.49384	1.63643	1.40705	1.57556	1.80084	1.71261
l(1)G0320	0.311587	0.0411111	24	15	0.182653	6.34465	6.47934	6.45621	6.67522	6.74748	6.78718	6.839	6.76649	6.81219	6.7939
CanA1	0.311587	0.0411111	18	9	0.181783	5.81283	5.83088	5.87132	6.05927	6.1841	6.0903	6.06756	6.16074	5.95081	6.06423
CG3841	0.311587	0.0411111	24	21	0.180514	1.13841	1.37177	1.35532	1.07634	1.23591	1.09028	1.28689	1.07669	1.529	1.37555
CG8080	0.311587	0.0411111	24	15	0.179273	4.3835	4.34867	4.50401	4.4488	4.45526	4.60672	4.76027	4.71359	4.65741	4.6176
CG8539	0.311587	0.0411111	24	9	0.178642	4.5915	4.50665	4.61178	4.92442	4.82775	4.73879	4.82545	4.84414	4.47665	4.62582
CG14655	0.311587	0.0411111	24	15	0.174087	4.72558	4.75263	4.74326	4.88947	4.9189	5.05983	5.0535	4.97746	5.03051	5.10079
numb	0.311587	0.0411111	24	0	0.17352	3.69052	3.94999	3.92213	3.6896	3.7046	3.66149	3.55201	3.51757	3.94834	3.78948
CG5888	0.311587	0.0411111	18	9	0.172639	3.57345	3.78479	3.62385	3.96033	4.04239	3.97044	3.86497	3.86057	3.65868	3.86664
CG6280	0.311587	0.0411111	24	9	0.170662	1.49807	1.53631	1.52308	1.67453	1.80875	1.8123	1.53853	1.76443	1.3832	1.50508
cold	0.311587	0.0411111	18	9	0.170037	4.3788	4.31393	4.30047	4.72121	4.69507	4.38195	4.54767	4.49318	4.48939	4.64733
MESR3	0.311587	0.0411111	24	21	0.169244	5.97772	5.86367	6.02407	5.71135	5.85717	5.66177	5.90044	5.78495	6.13979	6.10934
Ugt58Fa	0.311587	0.0411111	24	9	0.166809	2.25446	2.16608	2.23737	2.40819	2.46838	2.43327	2.6039	2.39068	2.20719	2.15478
Pdk1	0.311587	0.0411111	24	3	0.166009	5.32099	5.32663	5.32747	5.334	5.26699	5.07414	5.05218	5.08622	5.29586	5.10457
CG30357	0.311587	0.0411111	24	3	0.164326	2.65715	2.67069	2.72976	2.54603	2.53724	2.39644	2.51992	2.41627	2.42475	2.3022
CG6125	0.311587	0.0411111	24	0	0.163841	4.05548	4.32858	4.32167	4.00274	3.9974	4.04807	3.97306	3.93642	4.08996	4.31147
IP3K1	0.311587	0.0411111	18	3	0.162807	3.93514	4.09618	4.18509	4.02393	3.92826	3.87143	3.7882	3.76611	4.10389	4.04225
Hexo2	0.311587	0.0411111	24	12	0.161455	4.55215	4.83233	4.77619	4.90152	5.02825	4.96554	5.30314	5.00452	4.77388	4.85122
CG7342	0.311587	0.0411111	24	9	0.16002	3.3837	3.56245	3.49382	3.55761	3.83951	3.54076	3.61001	3.70429	3.35	3.31201
ClC-b	0.311587	0.0411111	18	9	0.159068	4.40864	4.44832	4.54449	4.76842	4.84614	4.65535	4.67429	4.56034	4.58949	4.76307
CG7560	0.311587	0.0411111	24	15	0.157345	4.16981	4.13793	4.07629	4.33129	4.32093	4.29881	4.57304	4.41741	4.41541	4.39999
Atg12	0.311587	0.0411111	18	9	0.157325	4.18256	4.23979	4.31466	4.47862	4.59404	4.39838	4.2713	4.55409	4.33827	4.3763
CG3409	0.311587	0.0411111	24	0	0.156142	5.40443	5.3873	5.38231	5.25857	5.1752	5.18361	5.10449	5.11171	5.39666	5.21255
Obp57c	0.311587	0.0411111	24	9	0.155938	6.61545	6.54966	6.46511	7.00484	6.62211	6.56801	6.47497	6.71465	6.06817	6.32023
mthl8	0.311587	0.0411111	18	6	0.155839	3.75627	3.5846	3.81768	3.85871	3.91446	3.57322	3.54154	3.63091	3.87401	3.71798
CG34409	0.311587	0.0411111	24	0	0.155592	1.94291	2.03765	2.06408	1.90915	1.96414	1.69006	1.69219	1.58025	2.03843	1.9101
CG14830	0.311587	0.0411111	24	6	0.154427	4.89743	4.79367	4.88159	4.91709	4.94704	4.61946	4.6987	4.69769	4.48833	4.79618
laza	0.311587	0.0411111	24	9	0.154187	2.79495	2.91491	3.01339	3.24454	3.4557	3.06649	3.08597	2.91213	2.84851	2.8955
CG17111	0.311587	0.0411111	24	12	0.153376	4.85381	4.80576	4.91611	5.13302	5.03076	5.09538	5.08845	5.17829	4.88503	5.0476
CG33054	0.311587	0.0411111	24	6	0.153295	4.08948	4.13002	4.2375	4.26885	4.33856	3.9872	4.12177	3.97792	3.75742	4.11697
CG8046	0.311587	0.0411111	24	12	0.151298	2.30519	2.33915	2.34218	2.3435	2.55444	2.43863	2.76508	2.6879	2.33981	2.47414
CG13813	0.311587	0.0411111	24	15	0.151176	1.41177	1.35805	1.28807	1.2986	1.29005	1.61069	1.51493	1.76669	1.49716	1.43094
IP3K2	0.311587	0.0411111	24	21	0.14984	4.24366	4.3752	4.22118	4.04119	3.90407	4.16561	4.31874	4.26925	4.52182	4.51397
CG2034	0.311587	0.0411111	24	15	0.148554	3.86309	3.75005	3.91262	3.86297	3.9966	4.07318	4.13843	4.08027	4.0092	4.09684
CG42822	0.311587	0.0411111	24	21	0.148031	2.01158	2.05981	2.33594	1.84425	1.65647	2.17701	1.94193	2.22529	2.37213	2.38636
Ptp10D	0.311587	0.0411111	24	3	0.147552	3.6957	3.70988	3.56341	3.67247	3.52121	3.49466	3.33908	3.45141	3.47829	3.36787
CG12140	0.311587	0.0411111	18	0	0.147251	6.41994	6.41999	6.44725	6.25071	6.06037	6.24181	6.16939	6.25516	6.24953	6.33625
CG18259	0.311587	0.0411111	18	9	0.146416	2.129	2.22997	2.1493	2.47584	2.39638	2.33555	2.21492	2.40023	2.18516	2.27331
CG3397	0.311587	0.0411111	24	12	0.145021	4.94253	5.03159	5.04008	5.02146	5.21788	5.24906	5.3918	5.31812	5.08115	5.05038
amd	0.311587	0.0411111	18	9	0.1448	1.55221	1.51807	1.51432	1.91072	1.75605	1.72631	1.58004	1.59619	1.58125	1.49127
CG17244	0.311587	0.0411111	24	15	0.144091	6.57892	6.63505	6.72743	6.74838	6.87516	6.83093	6.99639	6.9819	6.87983	6.86852
snoRNA:Psi28S-1175a	0.311587	0.0411111	18	9	0.142726	1	1.07178	1.20801	1.40352	1.34026	1.16771	1.35614	1.24524	1.22031	1.08063
CG32082	0.311587	0.0411111	24	9	0.141874	4.96634	4.83729	4.85533	5.1294	5.04219	5.08593	5.03793	5.07687	4.83425	4.91872
th	0.311587	0.0411111	24	0	0.138635	6.52165	6.55001	6.58184	6.45392	6.41649	6.26242	6.3522	6.28716	6.45198	6.62559
CG4692	0.311587	0.0411111	18	0	0.138528	9.68719	9.51602	9.63676	9.36484	9.32081	9.43878	9.49764	9.42986	9.42905	9.51843
Cyp12e1	0.311587	0.0411111	18	9	0.138285	4.1228	4.19563	4.29509	4.45423	4.49208	4.43356	4.34905	4.21864	4.18109	4.33215
ap	0.311587	0.0411111	24	12	0.138108	3.86194	3.83132	3.72442	4.08084	3.9823	3.95271	4.10104	4.14613	4.05543	3.88553
alt	0.311587	0.0411111	18	9	0.137552	5.15968	5.19379	5.21625	5.35395	5.46833	5.26179	5.41906	5.38857	5.31527	5.29495
tna	0.311587	0.0411111	24	21	0.137452	4.27169	4.44005	4.45486	4.12187	4.14251	4.21075	4.34934	4.33872	4.56804	4.37773
CG32512	0.311587	0.0411111	24	21	0.137222	3.43382	3.47998	3.46856	3.14401	3.3606	3.26305	3.48248	3.4016	3.591	3.73291
Adh	0.311587	0.0411111	18	12	0.136916	2.0313	2.30819	2.07109	2.21434	2.19663	2.26538	2.39177	2.39442	2.03326	1.8691
CG6145	0.311587	0.0411111	18	3	0.13641	5.15912	5.19436	5.42776	5.03241	5.26643	4.86707	5.12534	4.97061	5.30209	5.62572
Tsf3	0.311587	0.0411111	18	9	0.136153	3.51956	3.57738	3.64455	3.90823	3.81068	3.7679	3.71032	3.75301	3.72402	3.77481
CG42261	0.311587	0.0411111	24	21	0.133983	2.1797	2.04325	1.97221	1.89238	1.79056	1.90658	1.89875	1.79134	2.1884	1.93107
cdc2c	0.311587	0.0411111	24	3	0.133967	2.25639	1.9697	2.10188	1.9891	2.06754	1.79964	1.94006	1.7862	1.79217	1.95004
imd	0.311587	0.0411111	24	0	0.133958	4.16666	3.99256	4.18756	4.03432	3.94069	3.82033	3.88918	3.73682	3.92627	4.09276
CG3630	0.311587	0.0411111	24	21	0.133927	7.51082	7.66178	7.36789	7.21707	7.22342	7.37012	7.33681	7.44427	7.51393	7.56387
drongo	0.311587	0.0411111	24	9	0.132957	5.87316	5.80457	5.80265	6.05824	6.02889	6.0503	5.95078	6.01823	5.79019	5.89709
exex	0.311587	0.0411111	18	15	0.132888	3.07474	3.04221	3.19643	2.89983	3.00101	3.23629	3.24021	3.34025	3.07802	3.16813
CG1140	0.311587	0.0411111	18	3	0.132231	4.45925	4.38958	4.54162	4.34166	4.38412	4.12086	4.3791	4.16539	4.49515	4.44298
CG10361	0.311587	0.0411111	24	18	0.131745	4.24961	4.36982	4.2862	4.0531	4.16557	4.23895	4.43552	4.35188	4.62487	4.43809
CG1358	0.311587	0.0411111	18	9	0.130386	3.19324	3.30259	3.38153	3.41035	3.54363	3.52068	3.50406	3.53223	3.40542	3.43396
CG10657	0.311587	0.0411111	18	0	0.129217	2.51432	2.64008	2.48146	2.21456	2.29713	2.36041	2.45893	2.45216	2.373	2.62892
mRpS6	0.311587	0.0411111	24	18	0.128956	3.91887	4.00072	4.17429	3.91834	3.9436	4.10124	4.15296	4.03256	4.18753	4.25575
CG9416	0.311587	0.0411111	24	12	0.128872	5.18141	5.30669	5.17404	5.30806	5.28261	5.51652	5.44537	5.56888	5.22599	5.33426
CG31808	0.311587	0.0411111	24	3	0.128358	6.45788	6.53144	6.44884	6.38286	6.43966	6.26732	6.32268	6.26695	6.21579	6.27507
CG15414	0.311587	0.0411111	24	18	0.127454	1.34712	1.39693	1.51478	1.25916	1.26454	1.4486	1.42463	1.38466	1.6997	1.69502
CG6067	0.311587	0.0411111	24	0	0.127274	6.416	6.46205	6.67828	6.20981	6.44665	6.20669	6.30836	6.19685	6.38668	6.33836
crq	0.311587	0.0411111	24	9	0.126686	5.913	5.82807	5.88656	6.11889	6.13687	5.87932	5.98733	5.88198	5.70624	5.78775
RluA-2	0.311587	0.0411111	18	9	0.126666	2.63916	2.7213	2.7638	2.93969	3.02788	2.80361	2.91568	2.77464	2.81802	2.80465
CG1461	0.311587	0.0411111	18	12	0.126658	7.67545	7.71573	7.74581	7.7284	7.44828	7.88169	7.89449	7.89521	7.11044	7.2382
CG12264	0.311587	0.0411111	24	12	0.126484	7.45124	7.56539	7.53777	7.76321	7.71968	7.79342	7.58999	7.85316	7.5995	7.69379
CG31516	0.311587	0.0411111	24	21	0.126325	1.49728	1.43539	1.46916	1.25674	1.29755	1.40106	1.47166	1.24874	1.5284	1.58913
mRpL34	0.311587	0.0411111	24	3	0.126211	4.18121	4.18881	4.44765	4.0519	4.13736	4.00272	3.86642	4.09607	3.96403	4.0173
mub	0.311587	0.0411111	18	9	0.123234	5.77657	5.66423	5.56902	5.95745	5.89323	5.8744	5.76219	5.83191	5.85394	5.77981
GNBP2	0.311587	0.0411111	24	9	0.122668	5.27443	5.26637	5.3432	5.54735	5.44791	5.37369	5.36415	5.45083	5.12592	5.34697
Gp93	0.311587	0.0411111	24	15	0.12217	5.88902	5.89921	5.94625	5.9289	6.09152	6.06468	6.34288	6.21612	6.0391	6.00882
RpA-70	0.311587	0.0411111	18	9	0.121793	5.08202	5.23076	5.22159	5.43909	5.40933	5.26091	5.25595	5.2802	5.255	5.43836
CG15879	0.311587	0.0411111	18	6	0.121275	2.44268	2.61016	2.6443	2.68345	2.70971	2.44037	2.5209	2.31478	2.6912	2.84805
CG7646	0.311587	0.0411111	24	3	0.121168	4.83162	4.88116	4.87682	4.87464	4.85534	4.70439	4.63727	4.69612	4.69049	4.71246
CG33107	0.311587	0.0411111	18	9	0.120501	3.22229	3.2433	3.21776	3.49687	3.62867	3.25364	3.3889	3.24943	3.3109	3.35064
CG4716	0.311587	0.0411111	18	3	0.120328	10.7692	10.5466	10.7716	10.5514	10.6917	10.4962	10.5298	10.5216	10.7537	10.805
CG2051	0.311587	0.0411111	18	6	0.120114	3.50793	3.5812	3.63885	3.74651	3.82825	3.56649	3.63953	3.41133	3.67311	3.74247
CG3434	0.311587	0.0411111	18	6	0.12011	3.32427	3.27742	3.41559	3.57497	3.58344	3.37777	3.376	3.24697	3.56224	3.51256
kel	0.311587	0.0411111	18	3	0.120041	3.10329	2.91099	2.98858	2.93508	2.75679	2.80158	2.78002	2.73854	3.19436	3.02503
LanB2	0.311587	0.0411111	18	12	0.119818	3.79534	3.92245	3.93986	3.84156	3.88919	3.99797	4.13483	4.06243	3.71644	3.61453
CG14869	0.311587	0.0411111	18	9	0.119482	3.20429	3.3428	3.17583	3.42296	3.50772	3.40223	3.40674	3.46035	3.30333	3.41115
Gapdh2	0.311587	0.0411111	18	0	0.119434	9.26614	9.29753	9.36474	9.07546	9.10261	9.11987	9.14406	9.18211	9.11259	9.15564
qkr58E-2	0.311587	0.0411111	18	9	0.119243	5.20615	5.26036	5.12621	5.42791	5.46807	5.36716	5.3192	5.36302	5.36246	5.3957
CG5050	0.311587	0.0411111	24	0	0.119096	1.66888	1.60664	1.73653	1.51548	1.38164	1.50045	1.36714	1.45834	1.55542	1.4962
CG4721	0.311587	0.0411111	18	9	0.1187	6.84092	6.625	6.72393	7.04985	6.87193	6.86909	6.9117	6.88997	6.75687	6.75323
CG7492	0.311587	0.0411111	18	9	0.11831	5.39732	5.41292	5.35249	5.59835	5.53112	5.6196	5.49152	5.56148	5.40611	5.45476
Oscillin	0.311587	0.0411111	18	12	0.118241	3.82231	3.82313	3.81334	3.79843	3.97694	3.96321	4.00688	4.04776	3.66145	3.77973
CS-2	0.311587	0.0411111	24	0	0.118114	3.21826	3.3632	3.3021	3.21388	3.03446	3.08228	3.06133	2.94285	3.18604	3.10988
ham	0.311587	0.0411111	24	6	0.117337	1.64463	1.64938	1.53185	1.73243	1.6409	1.48319	1.54904	1.47032	1.45002	1.48243
yip2	0.311587	0.0411111	24	21	0.116927	7.5124	7.54573	7.60184	7.50845	7.20463	7.43944	7.56656	7.498	7.79583	7.73192
CG10932	0.311587	0.0411111	24	21	0.115932	5.39413	5.4099	5.51872	5.31739	5.30442	5.22768	5.39675	5.32385	5.5264	5.4878
mtg	0.311587	0.0411111	24	15	0.114768	1.65852	1.72213	1.81284	1.79243	1.73613	1.85494	1.96637	1.97473	1.89138	1.88444
CG13585	0.311587	0.0411111	24	12	0.11465	5.94668	5.9871	5.97096	6.08864	6.10882	6.09866	6.19712	6.17581	5.92457	6.07478
CG9386	0.311587	0.0411111	18	9	0.114355	3.05801	3.08315	3.22887	3.36046	3.43159	3.25486	3.16772	3.25021	3.14224	3.22394
NAAT1	0.311587	0.0411111	24	6	0.114121	5.44105	5.45577	5.62845	5.70952	5.60899	5.38563	5.55374	5.42646	5.40695	5.37781
Dcr-2	0.311587	0.0411111	18	6	0.113879	3.8017	3.869	3.92362	4.05643	4.04194	3.73788	3.82878	3.78887	4.07553	3.91242
CG16734	0.311587	0.0411111	18	6	0.113745	1.95975	1.95332	1.84394	2.27911	2.22328	1.87691	1.9067	1.95656	1.98737	2.14911
slow	0.311587	0.0411111	24	15	0.113141	2.6334	2.51485	2.78066	2.73959	2.7522	2.86179	2.79935	3.03631	2.76611	2.85558
pic	0.311587	0.0411111	18	6	0.112964	4.22768	4.42276	4.3654	4.62947	4.53828	4.32392	4.30264	4.30999	4.42496	4.53978
Gyk	0.311587	0.0411111	18	0	0.112184	6.13695	6.1141	6.12135	5.93192	5.91558	5.9666	6.04415	6.02607	5.97699	6.00358
Sema-2a	0.311587	0.0411111	24	6	0.111615	3.91308	3.84204	3.90826	3.94448	4.03343	3.78824	3.97021	3.76933	3.61516	3.6354
Tim17a2	0.311587	0.0411111	18	6	0.110972	1.24636	1.37187	1.38805	1.42403	1.42559	1.15051	1.22536	1.22068	1.51621	1.27856
CG6673	0.311587	0.0411111	18	9	0.110589	6.00124	6.04691	6.03119	6.25416	6.34215	6.06757	6.0762	6.1694	6.1555	6.13538
escl	0.311587	0.0411111	18	9	0.110208	1.96502	2.10212	2.04338	2.1818	2.25566	2.23453	2.12632	2.22483	2.11911	2.18573
CG14229	0.311587	0.0411111	24	15	0.110108	3.42038	3.46658	3.502	3.50552	3.58035	3.56609	3.64455	3.74463	3.58971	3.73606
CG4404	0.311587	0.0411111	18	6	0.109508	5.77951	5.6751	5.77544	5.8686	5.82854	5.56685	5.52067	5.55504	5.74016	5.71448
igl	0.311587	0.0411111	24	3	0.10839	4.52994	4.53645	4.41177	4.46752	4.37325	4.3335	4.3036	4.29773	4.33606	4.27847
JhI-1	0.311587	0.0411111	18	6	0.108376	3.27668	3.48569	3.38516	3.5593	3.57263	3.43975	3.33522	3.32316	3.49134	3.52657
CG11882	0.311587	0.0411111	24	12	0.108192	2.97915	3.00221	2.95303	3.01639	3.1291	3.16531	3.13226	3.14763	2.92093	3.07541
step	0.311587	0.0411111	18	9	0.108034	4.6443	4.60499	4.51939	4.82643	4.79954	4.7161	4.67485	4.74918	4.78314	4.61909
CG5567	0.311587	0.0411111	18	3	0.107548	5.59697	5.63085	5.64429	5.43991	5.46398	5.41226	5.46503	5.3778	5.6029	5.75006
CG5830	0.311587	0.0411111	18	9	0.107443	5.38237	5.33361	5.24909	5.59234	5.55617	5.41494	5.3621	5.45146	5.38386	5.37875
dlp	0.311587	0.0411111	24	9	0.106799	2.91728	3.01369	3.0272	3.19988	3.17823	3.01597	3.12748	3.01143	2.94327	2.89075
Gs1l	0.311587	0.0411111	18	0	0.106499	6.10866	5.96611	6.00421	5.82376	5.79025	5.82035	5.95015	5.9532	5.87943	5.99243
Ptp4E	0.311587	0.0411111	24	0	0.106315	3.9916	3.9655	3.82782	3.84419	3.76142	3.73595	3.73941	3.70769	3.98414	3.77889
mRpS7	0.311587	0.0411111	24	9	0.105683	7.02282	6.85873	6.87585	7.03689	7.04081	6.98094	7.02531	7.03968	6.83096	6.91262
AnnIX	0.311587	0.0411111	18	6	0.105556	8.01269	7.89045	7.99189	8.12692	8.0939	7.82322	7.93959	7.82492	8.00595	8.34732
Nop17l	0.311587	0.0411111	18	3	0.105162	4.31756	4.41646	4.44021	4.34624	4.25309	4.20336	4.21542	4.19912	4.44601	4.3198
CG32795	0.311587	0.0411111	24	3	0.105071	4.49421	4.58856	4.55203	4.44342	4.41545	4.34111	4.40812	4.30077	4.29483	4.39862
kuk	0.311587	0.0411111	24	9	0.104753	3.87629	3.99388	3.95342	4.21343	3.99531	4.08751	4.07639	4.0799	3.93937	3.87167
CG30379	0.311587	0.0411111	24	9	0.104095	1.25575	1.32194	1.38823	1.42867	1.45919	1.29461	1.67063	1.39194	1.17164	1.24472
CG8801	0.311587	0.0411111	24	3	0.104081	7.44348	7.57041	7.61379	7.41377	7.36168	7.34862	7.26658	7.32056	7.29183	7.44277
mge	0.311587	0.0411111	24	21	0.10367	5.499	5.56093	5.59933	5.39456	5.44367	5.39299	5.48273	5.45271	5.54799	5.651
CG31105	0.311587	0.0411111	24	18	0.1033	1.3697	1.29568	1.48485	1.24405	1.2084	1.38213	1.51219	1.40886	1.42489	2.54927
baz	0.311587	0.0411111	18	12	0.103008	4.75512	4.65735	4.64801	4.78361	4.65972	4.84446	4.80421	4.8636	4.64082	4.67096
mRpL35	0.311587	0.0411111	24	21	0.102966	4.201	4.23598	4.37208	4.16239	4.08928	4.14684	4.27414	4.22647	4.42032	4.40107
CG10425	0.311587	0.0411111	18	9	0.10236	4.11175	4.19771	4.27729	4.37092	4.53652	4.28369	4.34215	4.22714	4.18565	4.27999
Ggt-1	0.311587	0.0411111	24	15	0.102294	4.73956	4.83464	4.77629	4.80015	4.68463	4.90744	4.94045	4.9852	4.88586	4.84699
dap	0.311587	0.0411111	24	9	0.102197	3.5681	3.50309	3.44945	3.72168	3.64877	3.60817	3.51059	3.47533	3.30951	3.45162
CG30463	0.311587	0.0411111	24	15	0.102041	3.80961	3.95672	3.85422	3.86056	4.00207	4.1135	4.08451	4.02086	4.03371	3.89745
CG14314	0.311587	0.0411111	24	3	0.102026	2.8136	2.90896	2.86581	2.88578	2.84112	2.69683	2.68931	2.74763	2.71057	2.74894
RpS3A	0.311587	0.0411111	18	6	0.101634	9.92435	9.99011	10.0842	10.1302	10.169	9.88851	10.0191	9.90296	10.023	10.1468
CG10420	0.311587	0.0411111	18	9	0.100947	3.15733	3.07108	3.20842	3.32188	3.36124	3.17446	3.2977	3.3002	3.25476	3.20278
CG1443	0.311587	0.0411111	24	9	0.100938	7.1481	7.20341	7.22507	7.34615	7.43239	7.3304	7.14892	7.18833	6.93952	7.12816
26-29-p	0.311587	0.0411111	24	12	0.10075	6.9615	6.9164	7.07574	7.16459	7.20471	7.08121	7.21597	7.21404	7.05472	7.16041
CG18262	0.311587	0.0411111	24	15	0.10071	2.12882	2.1762	2.26488	2.27459	2.31181	2.35269	2.32366	2.40731	2.34199	2.44893
CG13126	0.311587	0.0411111	18	6	0.10051	3.4908	3.58273	3.57759	3.80762	3.76332	3.60889	3.56411	3.48577	3.6819	3.75957
CG31961	0.311587	0.0411111	18	6	0.100422	3.54704	3.54816	3.60588	3.68962	3.63759	3.38707	3.46441	3.39572	3.41939	3.60724
snoRNA:Psi28S-3327b	0.311587	0.0411111	18	3	0.100249	1.23358	1.37555	1.37998	1.29153	1.1419	1.23833	1.149	1	1.48612	1.41687
Mob3	0.311587	0.0411111	18	9	0.0997827	4.63523	4.7474	4.7388	5.00325	4.90168	4.77732	4.77538	4.79452	4.65257	4.7899
CcapR	0.311587	0.0411111	24	3	0.0996844	1.56357	1.52752	1.58983	1.46694	1.42138	1.3538	1.36251	1.40129	1.34542	1.42259
l(3)72Do	0.311587	0.0411111	24	6	0.0995875	4.16393	4.2368	4.21449	4.34749	4.40698	4.06984	4.20665	4.14445	4.0653	4.1998
CG9065	0.311587	0.0411111	18	12	0.0995521	8.47492	8.30619	8.41199	8.37676	8.38264	8.52394	8.51703	8.60605	8.24929	8.3031
CG32537	0.311587	0.0411111	24	18	0.0989532	2.38799	2.47724	2.51888	2.364	2.48913	2.51799	2.50115	2.54565	2.67212	2.65882
sinu	0.311587	0.0411111	18	9	0.0988862	4.16913	4.21228	4.15476	4.37059	4.34307	4.30417	4.3159	4.17759	4.15724	4.23792
CG14757	0.311587	0.0411111	18	12	0.0986773	8.86355	8.68562	8.79452	8.74439	8.73497	8.92725	8.88308	8.87864	8.57002	8.50748
cyc	0.311587	0.0411111	18	6	0.0985495	4.10068	4.20119	4.28134	4.34268	4.36465	4.1315	4.22739	4.1426	4.32233	4.30457
CG8321	0.311587	0.0411111	24	6	0.0983571	5.4919	5.45135	5.55285	5.59375	5.53426	5.47011	5.35413	5.35356	5.22774	5.41411
nompC	0.311587	0.0411111	24	6	0.0979534	2.35407	2.25172	2.13226	2.38406	2.26138	2.21555	2.16277	2.159	2.09177	2.0907
Pal2	0.311587	0.0411111	24	3	0.097882	5.20316	5.15722	5.21227	5.05566	5.12757	5.06697	4.93942	5.00224	5.09031	4.95189
Atg1	0.311587	0.0411111	24	0	0.0978162	4.26629	4.12634	4.27009	4.09806	4.18307	3.92448	4.00905	4.06087	4.19535	4.12825
VhaM9.7-c	0.311587	0.0411111	18	9	0.0976674	5.7717	5.70236	5.70238	5.8654	5.95524	5.80816	5.84194	5.84424	5.82441	5.86193
CG13631	0.311587	0.0411111	24	21	0.0975567	6.03895	6.03587	6.11215	5.9326	5.96782	6.00387	6.10675	6.07308	6.2642	6.31685
CG9175	0.311587	0.0411111	24	12	0.0974421	3.55685	3.52127	3.4084	3.54745	3.58234	3.74588	3.68187	3.70704	3.50885	3.57579
NP15.6	0.311587	0.0411111	18	15	0.0973195	8.13075	8.06674	8.18727	7.89059	7.8742	8.16289	8.17341	8.11211	7.98496	8.05871
CG33470	0.311587	0.0411111	18	0	0.0968533	1.29032	1.22355	1.47641	1.15524	1.07886	1.07125	1.17814	1.1769	1.1956	1.41196
CG9992	0.311587	0.0411111	18	9	0.0962063	3.47335	3.32896	3.50115	3.66541	3.63508	3.53034	3.51589	3.5071	3.48296	3.53937
CG31731	0.311587	0.0411111	18	9	0.0957861	4.05674	4.17884	4.18412	4.32393	4.50767	4.21253	4.25272	4.18786	4.28019	4.19836
Pp1-87B	0.311587	0.0411111	18	9	0.0950933	7.0106	7.05181	7.06024	7.19708	7.25137	7.1604	7.14366	7.12959	7.09636	7.19734
CG12290	0.311587	0.0411111	24	6	0.0946568	3.54503	3.50226	3.39759	3.50621	3.46281	3.43757	3.3905	3.36134	3.32463	3.20364
gek	0.311587	0.0411111	18	9	0.0941226	4.90065	4.92652	4.82818	5.11375	5.02738	5.06601	4.91534	4.98634	4.96624	4.933
CG13623	0.311587	0.0411111	18	12	0.0936959	5.93355	5.81202	5.87536	5.79936	5.89236	5.97836	5.98233	6.02349	5.68614	5.76102
CG1969	0.311587	0.0411111	24	15	0.0936683	4.49479	4.58027	4.59282	4.57589	4.69212	4.72172	4.77298	4.69276	4.66834	4.7209
snRNA:U1:95Cb	0.311587	0.0411111	24	12	0.0931139	1.37857	1.3742	1.40221	1.50646	1.48236	1.49457	1.55029	1.69119	1.42443	1.36289
hts	0.311587	0.0411111	24	6	0.0930425	4.74394	4.71268	4.65926	4.75225	4.73292	4.61843	4.54314	4.59459	4.61428	4.59212
CG13578	0.311587	0.0411111	18	6	0.0929906	1.45849	1.52424	1.50527	1.92197	1.56785	1.25831	1.4206	1.43688	1.45144	1.70564
CG4302	0.311587	0.0411111	24	3	0.0927965	5.59788	5.65257	5.76636	5.56682	5.62623	5.36181	5.58206	5.42636	5.58885	5.58506
CG13933	0.311587	0.0411111	18	9	0.0925656	4.41086	4.36804	4.38544	4.60285	4.60429	4.48226	4.4538	4.48069	4.51903	4.45822
CG7054	0.311587	0.0411111	18	6	0.0925302	6.29629	6.32852	6.42049	6.45757	6.62827	6.33105	6.26562	6.31501	6.45658	6.50875
CG34342	0.311587	0.0411111	18	6	0.0924567	1.20987	1.1423	1.26115	1.5746	1.30594	1.14626	1.07118	1.16161	1.25395	1.42413
CG1910	0.311587	0.0411111	18	9	0.0921924	4.9588	4.95707	4.96621	5.19803	5.1223	5.07961	5.06593	5.06213	5.13732	5.05032
CG13741	0.311587	0.0411111	18	9	0.0921175	1.61451	1.74313	1.62982	1.81327	1.88278	1.75635	1.75265	1.7594	1.75365	1.58702
Surf4	0.311587	0.0411111	24	12	0.0919911	5.94277	5.94392	5.88561	6.0819	6.1122	6.01105	6.12389	6.12008	6.02865	6.06128
CG5776	0.311587	0.0411111	18	6	0.0919331	1.94172	2.06717	2.00022	2.25408	2.13555	1.97844	1.96409	1.94695	2.18147	2.10519
CG5131	0.311587	0.0411111	24	0	0.0913511	4.30563	4.306	4.38612	4.25371	4.21696	4.17534	4.17681	4.24504	4.2911	4.49787
trbd	0.311587	0.0411111	18	12	0.0912304	6.71403	6.72321	6.68718	6.64641	6.7494	6.86534	6.87606	6.77999	6.67527	6.6377
CR43650	0.311587	0.0411111	18	0	0.0908699	1.6453	1.72642	1.63297	1.5421	1.43864	1.4854	1.60485	1.54229	1.6169	1.49265
chico	0.311587	0.0411111	18	6	0.0906281	5.13329	5.13859	5.20297	5.29847	5.25725	5.01854	5.00973	5.02154	5.19935	5.12258
Clbn	0.311587	0.0411111	18	6	0.0904856	4.11783	4.23245	4.21152	4.39686	4.42592	4.18079	4.1897	4.22442	4.27959	4.36287
Srp72	0.311587	0.0411111	24	15	0.0902042	4.09941	4.20707	4.20334	4.27833	4.29472	4.33091	4.40752	4.31412	4.39709	4.38894
CG7694	0.311587	0.0411111	18	6	0.0900628	2.51233	2.65102	2.47609	2.55317	2.71313	2.22135	2.45857	2.35071	2.68941	2.97934
CG4194	0.311587	0.0411111	18	3	0.0894624	1.35713	1.22782	1.32241	1.33077	1.30012	1.18624	1.15223	1.21548	1.36388	1.35436
CG5916	0.311587	0.0411111	18	6	0.0893585	2.56668	2.49663	2.58686	2.62086	2.74187	2.52001	2.41817	2.43656	2.53781	2.63888
CG3239	0.311587	0.0411111	24	9	0.0892913	4.74181	4.52838	4.66991	4.77525	4.92652	4.74245	4.77936	4.78866	4.59049	4.66239
CG12975	0.311587	0.0411111	18	6	0.0892627	3.80818	3.81361	3.75902	3.90308	3.95636	3.70519	3.76681	3.69732	3.95006	4.0628
unc-5	0.311587	0.0411111	18	0	0.0892196	2.16606	2.15799	2.14505	2.02535	2.00826	2.01183	2.10727	2.06911	2.09385	2.06121
CTPsyn	0.311587	0.0411111	18	9	0.0888989	4.34664	4.38715	4.41317	4.49878	4.54996	4.53766	4.5141	4.49331	4.37989	4.47278
Cyp28d2	0.311587	0.0411111	18	6	0.0885713	2.08752	2.16878	2.20864	2.33007	2.24012	2.07196	2.03352	2.12591	2.13774	2.18032
dnk	0.311587	0.0411111	18	6	0.0884226	2.81739	2.90866	2.90388	2.97299	3.06618	2.69268	2.87813	2.86688	3.03507	2.97784
CG4169	0.311587	0.0411111	18	15	0.0878803	9.75056	9.66102	9.66632	9.51429	9.46375	9.74327	9.6877	9.69281	9.49856	9.60923
CG15630	0.311587	0.0411111	24	9	0.0878594	3.17282	3.22555	3.2411	3.37059	3.34127	3.33624	3.25596	3.37147	3.21199	3.22111
Dhpr	0.311587	0.0411111	24	15	0.0878502	5.67228	5.58646	5.74783	5.81325	5.77324	5.84665	5.96839	5.86428	5.86937	5.87036
Ino80	0.311587	0.0411111	18	6	0.0876524	2.21993	2.23651	2.2985	2.39528	2.38813	2.26416	2.18779	2.14871	2.44696	2.32099
CG11248	0.311587	0.0411111	18	6	0.0872389	3.17133	3.23274	3.16207	3.30887	3.39817	3.25116	3.14712	3.15121	3.31554	3.27448
Cyp6a15Psi	0.311587	0.0411111	24	3	0.0864226	1.92281	1.99287	2.34829	1.88454	1.81442	1.813	1.78008	1.81429	1.74443	1.85765
Obp18a	0.311587	0.0411111	18	6	0.0863671	4.53932	4.67121	4.64157	4.75647	4.8226	4.5778	4.61563	4.59768	4.69858	4.80776
SCAP	0.311587	0.0411111	24	6	0.0860337	4.81365	4.82896	4.83757	4.9628	4.92645	4.80283	4.75462	4.74111	4.81726	4.65295
Uhg1	0.311587	0.0411111	18	6	0.0857526	3.98748	3.9564	4.05453	4.04396	4.09545	3.80523	3.9543	3.77989	3.97412	4.08649
CG13226	0.311587	0.0411111	18	3	0.0857335	1.37063	1.49375	1.38977	1.44366	1.46993	1.31793	1.24041	1.35879	1.74472	1.65014
CG15890	0.311587	0.0411111	24	6	0.0856172	2.59279	2.65709	2.57983	2.74685	2.65406	2.58593	2.47486	2.65052	2.46903	2.45875
CG6959	0.311587	0.0411111	24	3	0.0856108	4.5975	4.62899	4.62057	4.61275	4.5167	4.3818	4.48407	4.3715	4.56069	4.61206
Pis	0.311587	0.0411111	18	9	0.0855599	6.009	6.02833	6.02626	6.20914	6.23433	6.05494	6.13522	6.06433	6.01772	6.11367
beta'Cop	0.311587	0.0411111	24	12	0.0854079	4.78062	4.7795	4.83418	4.90141	5.02042	4.94343	5.02141	4.93529	4.92287	4.9271
CG12384	0.311587	0.0411111	24	15	0.0853308	5.87929	5.79922	5.96487	5.92053	5.90976	6.01074	6.04889	6.0404	5.93337	6.02187
Est-6	0.311587	0.0411111	18	15	0.0851613	8.72131	8.79607	8.7466	8.64611	8.67388	8.88997	8.92476	8.85899	8.22533	8.22722
l(1)dd4	0.311587	0.0411111	18	9	0.0842442	2.86624	2.83212	2.79942	3.01038	3.00308	2.91542	2.89994	2.95966	2.92333	2.92843
maf-S	0.311587	0.0411111	18	9	0.0839118	6.05927	5.97377	6.10072	6.20076	6.21267	6.13	6.19001	6.11349	6.05663	6.1667
CG1319	0.311587	0.0411111	24	9	0.083737	6.07353	6.12685	6.05422	6.25714	6.14724	6.17639	6.18573	6.09716	5.9855	6.05438
Proc-R	0.311587	0.0411111	24	12	0.0836394	3.81988	3.91815	3.85231	4.03635	4.03597	4.11937	4.03881	4.03643	4.07425	3.99562
CG13397	0.311587	0.0411111	18	15	0.083609	3.09635	3.07232	3.06955	2.88985	2.94976	3.08306	3.11793	3.18226	2.86143	2.93954
Rep	0.311587	0.0411111	18	3	0.0835192	3.5308	3.49189	3.60501	3.44732	3.56492	3.35226	3.417	3.44248	3.54798	3.61785
Spindly	0.311587	0.0411111	24	12	0.0831451	1.49197	1.47805	1.44446	1.57596	1.65245	1.70159	1.54123	1.65511	1.59201	1.53487
CG42678	0.311587	0.0411111	18	9	0.0827801	6.03131	6.0951	6.05495	6.19518	6.20453	6.20187	6.16946	6.15339	6.07141	6.19387
CG10863	0.311587	0.0411111	18	15	0.0823772	7.50335	7.54399	7.53543	7.4491	7.49593	7.64147	7.7985	7.71761	7.33812	7.38929
CG14010	0.311587	0.0411111	24	0	0.0820661	2.23009	2.22058	2.1383	2.1124	1.99732	1.96699	1.99629	2.05544	2.09806	2.02948
bin3	0.311587	0.0411111	24	15	0.0820173	4.11755	4.03146	3.92157	4.13814	4.12687	4.16538	4.18349	4.22862	4.35645	4.13443
MFS10	0.311587	0.0411111	24	12	0.0819459	4.30736	4.4112	4.45818	4.49435	4.52822	4.52792	4.59646	4.52709	4.39742	4.47745
CG6841	0.311587	0.0411111	18	6	0.0818663	3.07203	3.30683	3.30896	3.39758	3.33542	3.26755	3.20008	3.21299	3.32311	3.36015
RhoGAP92B	0.311587	0.0411111	18	6	0.0817161	4.29263	4.2421	4.34519	4.37968	4.38997	4.16006	4.21755	4.22412	4.22135	4.35126
CG10927	0.311587	0.0411111	18	3	0.081548	1.73183	1.65417	1.65573	1.66235	1.71496	1.57138	1.5597	1.53718	1.73942	1.88989
CG8270	0.311587	0.0411111	18	9	0.0815096	2.9176	2.86426	2.8997	3.12162	3.07746	2.92622	3.00405	2.92768	2.915	3.04506
capu	0.311587	0.0411111	24	6	0.0813562	3.44767	3.44976	3.45673	3.50542	3.46774	3.46938	3.37043	3.35269	3.13117	3.14897
smi35A	0.311587	0.0411111	18	0	0.081059	3.67502	3.67376	3.67603	3.56495	3.49107	3.5692	3.56833	3.51607	3.62357	3.54741
Rrp47	0.311587	0.0411111	18	6	0.0809261	4.16161	4.17266	4.23527	4.34159	4.39746	4.22997	4.20789	4.14179	4.31332	4.31872
Rev1	0.311587	0.0411111	18	6	0.0808665	2.57144	2.65112	2.6858	2.83777	2.75113	2.56998	2.63826	2.70164	2.7239	2.74187
wkd	0.311587	0.0411111	24	6	0.0805699	5.92656	5.90401	5.85825	6.04275	6.01404	5.84938	5.81973	5.82089	5.69559	5.89926
CG4854	0.311587	0.0411111	24	12	0.0805571	1.70543	1.75108	1.70171	1.88112	1.839	1.91062	1.90593	1.80603	1.85793	1.792
Best1	0.311587	0.0411111	18	6	0.0804408	4.4113	4.52682	4.49065	4.54074	4.54726	4.29316	4.43024	4.26439	4.51044	4.57229
spi	0.311587	0.0411111	18	6	0.0803005	5.34549	5.30711	5.33986	5.41191	5.45624	5.19465	5.27965	5.2072	5.28037	5.43956
CG43102	0.311587	0.0411111	24	21	0.0802644	4.42495	4.403	4.42505	4.31144	4.29165	4.33333	4.22823	4.35753	4.56997	4.40349
dar1	0.311587	0.0411111	18	15	0.0802412	2.33745	2.35393	2.43223	2.32809	2.30088	2.53171	2.53393	2.50836	2.30943	2.46663
CG42327	0.311587	0.0411111	18	9	0.0800065	4.20917	4.14134	4.22653	4.43755	4.26596	4.32825	4.31825	4.32034	4.22659	4.27096
CG4552	0.311587	0.0411111	24	12	0.0798218	5.41866	5.40647	5.40163	5.51935	5.52768	5.5842	5.50229	5.56902	5.42112	5.51985
Eaat1	0.311587	0.0411111	18	15	0.0797323	7.7671	7.66897	7.63165	7.66069	7.47133	7.79843	7.72741	7.85724	7.66562	7.56061
DNApol-delta	0.311587	0.0411111	18	9	0.0795831	2.54442	2.52083	2.53644	2.66322	2.74743	2.63476	2.52254	2.64356	2.60173	2.63426
CG9267	0.311587	0.0411111	18	6	0.0794781	3.76672	3.93386	3.90567	4.00897	4.03124	3.80273	3.91739	3.85569	3.99093	3.98254
ru	0.311587	0.0411111	24	6	0.0794145	1.89695	2.0051	1.9766	2.07176	1.98388	1.89723	1.95945	1.8358	1.86682	1.83045
spir	0.311587	0.0411111	24	3	0.0792002	4.02809	3.9783	3.95657	3.8663	4.01134	3.82587	3.86042	3.76304	3.90177	3.91627
GV1	0.311587	0.0411111	24	6	0.0791351	4.86112	4.86635	4.9418	4.92373	4.91961	4.85073	4.71411	4.8077	4.49758	4.83705
Cap	0.311587	0.0411111	18	6	0.0790172	3.64022	3.56119	3.59304	3.76483	3.70542	3.63341	3.56941	3.56768	3.66972	3.67108
T48	0.311587	0.0411111	24	0	0.0786218	4.02294	4.02783	3.9369	3.94492	3.83686	3.79322	3.8388	3.82922	3.91665	3.88191
siz	0.311587	0.0411111	24	0	0.0784839	5.08642	5.07063	5.0153	4.95916	4.94921	4.89887	4.91125	4.962	5.01941	5.04512
CG3719	0.311587	0.0411111	24	18	0.0783658	6.66181	6.56116	6.73609	6.4348	6.64011	6.70033	6.71273	6.67199	6.76499	6.8972
CG12194	0.311587	0.0411111	18	6	0.0776456	3.03727	3.08784	3.1451	3.16615	3.17563	3.04674	3.01965	3.01202	3.06467	3.09085
swaPsi	0.311587	0.0411111	18	6	0.0775924	1.30868	1.22148	1.35559	1.39187	1.45852	1.30217	1.32883	1.19737	1.33465	1.37644
Dab	0.311587	0.0411111	24	3	0.0775046	3.94024	3.89777	3.88498	3.84227	3.79217	3.78817	3.70761	3.75678	3.85889	3.7142
CR31292	0.311587	0.0411111	24	3	0.0772408	1.03934	1.18943	1.13066	1.17225	1.11275	1	1.02448	1	1.03592	1.0741
Cyp6a13	0.311587	0.0411111	24	6	0.0770181	4.63742	4.66488	4.72207	4.80819	4.74732	4.68476	4.6353	4.67433	4.52329	4.55596
CG2183	0.311587	0.0411111	24	6	0.0769113	3.41666	3.38548	3.40759	3.53718	3.47941	3.36996	3.26661	3.31863	3.32654	3.32039
CG11190	0.311587	0.0411111	18	6	0.0765821	4.03182	3.99521	4.12475	4.21758	4.13846	4.01478	4.08713	3.99405	4.13624	4.16398
mus210	0.311587	0.0411111	18	6	0.0765797	4.17067	4.22225	4.21735	4.38421	4.31923	4.16066	4.15012	4.12345	4.2998	4.15773
CG31102	0.311587	0.0411111	18	9	0.0764679	4.10087	4.02945	4.08808	4.17222	4.28205	4.15938	4.19995	4.15851	4.13989	4.18092
CG10092	0.311587	0.0411111	18	6	0.076388	2.45024	2.49712	2.47945	2.57337	2.66179	2.37932	2.49612	2.40132	2.64479	2.58488
fbl	0.311587	0.0411111	18	3	0.0761787	5.48365	5.53258	5.58472	5.42417	5.56172	5.23489	5.43336	5.42873	5.58554	5.64868
CkIIalpha	0.311587	0.0411111	18	6	0.0761328	5.98674	6.06211	6.00621	6.22051	6.20669	6.02038	5.95444	6.00466	6.02665	6.1342
CG31368	0.311587	0.0411111	18	6	0.0756767	2.9915	3.0092	3.07872	3.15786	3.13722	3.04553	2.91256	2.977	3.09419	3.03617
CG7888	0.311587	0.0411111	24	12	0.0756272	4.84452	4.82953	4.8642	4.93648	4.90659	4.97339	5.07623	4.92109	4.79496	4.874
Oseg6	0.311587	0.0411111	18	6	0.0755172	1.39299	1.34264	1.26021	1.47385	1.40753	1.22734	1.29757	1.30923	1.37398	1.3545
CG7337	0.311587	0.0411111	24	6	0.0754766	5.19509	5.11822	5.07793	5.24435	5.13566	5.11167	5.02892	5.06009	5.06521	4.96019
stai	0.311587	0.0411111	18	6	0.0754083	4.35107	4.35553	4.40457	4.45994	4.41821	4.2211	4.1569	4.21312	4.37966	4.29044
smo	0.311587	0.0411111	24	3	0.0753974	2.616	2.54355	2.55923	2.54151	2.55988	2.35971	2.45261	2.47096	2.47346	2.44489
Rh7	0.311587	0.0411111	24	6	0.0750474	1.84302	1.78303	1.76904	1.90069	1.8366	1.77754	1.71484	1.73047	1.75255	1.59292
CG14881	0.311587	0.0411111	18	6	0.074983	2.73709	2.74645	2.84621	2.77462	2.87194	2.7258	2.63412	2.52368	2.85132	3.00408
CG4300	0.311587	0.0411111	18	15	0.0742446	6.21546	6.26557	6.19402	6.13732	6.15493	6.37064	6.32194	6.30127	6.09529	6.10492
unc-119	0.311587	0.0411111	18	6	0.0741391	3.99011	3.9332	3.92228	4.17782	4.09186	3.93468	3.98966	3.89391	4.01976	4.01031
jdp	0.311587	0.0411111	24	6	0.0739846	5.01724	5.11358	5.05375	5.07691	5.07708	5.03065	4.96749	5.04406	4.91261	4.90912
SP1173	0.311587	0.0411111	24	9	0.0739726	6.03364	5.97009	5.90336	6.26975	6.11659	6.00012	6.04711	5.99175	5.94395	5.91094
lbk	0.311587	0.0411111	24	3	0.0738976	3.74075	3.7102	3.70365	3.65821	3.63335	3.62245	3.56594	3.55888	3.63935	3.50181
hd	0.311587	0.0411111	18	6	0.0735469	1.42733	1.52169	1.51839	1.61082	1.63403	1.50787	1.46405	1.4432	1.61334	1.57615
CG2846	0.311587	0.0411111	18	3	0.0734475	4.71904	4.65906	4.84101	4.64725	4.80619	4.61349	4.628	4.64078	4.82366	4.81702
CG3812	0.311587	0.0411111	18	6	0.0731361	2.55173	2.60916	2.5112	2.7161	2.60159	2.41826	2.49972	2.48588	2.66302	2.51814
wnd	0.311587	0.0411111	24	6	0.073117	3.37677	3.47907	3.45967	3.52778	3.5361	3.45946	3.33819	3.40138	3.37567	3.34837
egh	0.311587	0.0411111	18	6	0.0727924	5.54527	5.51642	5.48386	5.64816	5.53907	5.43296	5.394	5.38375	5.64552	5.68428
Cdk9	0.311587	0.0411111	24	0	0.0726163	3.35151	3.47446	3.47423	3.31942	3.39809	3.34407	3.30674	3.24505	3.42211	3.40643
CG40498	0.311587	0.0411111	24	3	0.0720231	3.28533	3.17259	3.29637	3.20379	3.21594	3.10193	3.14453	3.09928	3.20234	3.11574
CG7220	0.311587	0.0411111	24	3	0.0720217	5.56842	5.62296	5.66368	5.56286	5.65342	5.42497	5.51471	5.49052	5.5215	5.598
Gel	0.311587	0.0411111	18	12	0.0717296	8.02722	7.893	8.02455	8.01787	8.10671	8.08508	8.1754	8.13647	7.87323	7.92715
CG18508	0.311587	0.0411111	18	6	0.0713796	4.63728	4.63584	4.66691	4.80101	4.76406	4.6186	4.71954	4.59451	4.74163	4.70992
Vha16-1	0.311587	0.0411111	18	3	0.0713625	9.06497	9.08469	9.08802	9.07977	9.10247	8.94886	9.00278	8.93259	9.14566	9.111
CG7379	0.311587	0.0411111	18	9	0.0708825	4.56259	4.63616	4.68045	4.80374	4.75854	4.70501	4.73885	4.73526	4.70016	4.76956
Tak1	0.311587	0.0411111	18	9	0.0704492	4.47024	4.49802	4.50744	4.63869	4.66444	4.56817	4.57433	4.54496	4.55369	4.62915
mor	0.311587	0.0411111	18	9	0.0701736	4.09488	4.03758	4.02446	4.16839	4.17242	4.11485	4.15454	4.17469	4.14814	4.12646
CG8060	0.311587	0.0411111	18	6	0.0694584	2.71251	2.802	2.76782	2.96034	2.9023	2.74125	2.71085	2.73244	2.81999	2.75474
KaiRIA	0.311587	0.0411111	24	9	0.0693149	2.34866	2.38137	2.31615	2.51044	2.41005	2.41418	2.40788	2.4538	2.28236	2.35352
Cam	0.311587	0.0411111	24	21	0.0692088	6.7741	6.81144	6.74701	6.67583	6.73225	6.6639	6.73857	6.69437	6.85465	6.80806
Cap-G	0.311587	0.0411111	18	6	0.0689758	2.37766	2.42908	2.45091	2.5471	2.51205	2.41315	2.36746	2.35934	2.45422	2.39453
CG32676	0.311587	0.0411111	18	6	0.068705	4.04557	4.03806	3.99592	4.09299	4.08998	3.99114	3.893	3.86769	4.09317	4.01743
Hsepi	0.311587	0.0411111	18	9	0.0686521	3.70469	3.7082	3.70537	3.8492	3.86841	3.73138	3.79289	3.77397	3.84217	3.77052
CG7834	0.311587	0.0411111	24	21	0.068554	7.55691	7.59599	7.59088	7.43358	7.38464	7.52791	7.55197	7.5085	7.62787	7.54577
Oseg1	0.311587	0.0411111	24	6	0.0682089	1.92423	1.93335	1.89561	2.04635	1.9754	1.89523	1.86412	1.80153	1.79915	1.91059
cora	0.311587	0.0411111	18	9	0.0681082	6.97617	6.95232	6.96798	7.07412	7.14377	7.04701	7.04479	7.06057	7.01241	7.09774
CG10936	0.311587	0.0411111	18	15	0.0680647	1.81195	1.8649	1.7728	1.76866	1.70977	1.96816	1.91308	1.85521	1.66606	1.80556
CG17163	0.311587	0.0411111	18	6	0.0679424	2.91963	2.89784	2.80598	2.91227	2.97211	2.80032	2.73227	2.81856	2.90088	2.96141
SelD	0.311587	0.0411111	24	15	0.0677875	3.74364	3.6528	3.71766	3.73657	3.77432	3.81353	3.92096	3.82971	3.83396	3.82452
CG34398	0.311587	0.0411111	18	15	0.0675022	5.17605	5.19377	5.11593	5.15925	4.98563	5.28308	5.20759	5.29241	5.17136	5.12899
osm-1	0.311587	0.0411111	18	12	0.0674152	2.22582	2.18704	2.14003	2.20567	2.08493	2.25888	2.22796	2.36035	1.95425	2.08272
CG12948	0.311587	0.0411111	24	18	0.0673364	3.02116	2.93505	2.88245	2.96082	2.89232	2.98661	3.02944	3.03028	3.04721	3.10686
Drep-2	0.311587	0.0411111	24	3	0.0669114	1.97008	1.91268	1.8424	1.78959	1.80432	1.77952	1.75954	1.69497	1.82413	1.71462
CG7879	0.311587	0.0411111	18	9	0.0668711	3.0132	3.01315	3.05582	3.2318	3.17826	3.08082	3.08656	3.09842	3.01881	3.10858
CG1607	0.311587	0.0411111	24	6	0.0668548	5.55421	5.56588	5.64865	5.76804	5.71431	5.62451	5.64697	5.5541	5.487	5.42244
Tim8	0.311587	0.0411111	24	18	0.0668124	5.94735	5.88655	5.99931	5.8184	5.91289	5.93659	6.02136	5.9481	6.02318	6.14097
CG5385	0.311587	0.0411111	18	9	0.066645	4.2703	4.30338	4.28444	4.45347	4.36002	4.32069	4.34624	4.4508	4.31	4.43474
CG32068	0.311587	0.0411111	24	9	0.0662976	7.27643	7.18571	7.26605	7.35981	7.39512	7.23744	7.32808	7.2917	7.22735	7.22132
PKD	0.311587	0.0411111	24	12	0.0662799	4.88808	4.89335	4.84082	4.90954	4.89415	5.05807	4.98181	5.04962	4.85661	4.92827
Spase12	0.311587	0.0411111	24	15	0.0661244	5.57941	5.60396	5.61781	5.66425	5.6494	5.68208	5.79633	5.67006	5.67292	5.8254
tws	0.311587	0.0411111	18	9	0.0660784	5.15537	5.10652	5.10541	5.37628	5.32505	5.19504	5.12262	5.17804	5.1397	5.11707
Drep-4	0.311587	0.0411111	18	6	0.065914	3.1208	3.21606	3.17646	3.34544	3.26065	3.1249	3.16227	3.15322	3.26724	3.21938
CG4629	0.311587	0.0411111	18	0	0.0655304	4.72027	4.74691	4.77606	4.64638	4.6281	4.66773	4.61833	4.71573	4.73173	4.72646
Fak56D	0.311587	0.0411111	18	9	0.0654754	3.81887	3.85183	3.80331	4.00037	3.9492	3.89455	3.85543	3.90821	3.91022	3.82656
Hrd3	0.311587	0.0411111	18	9	0.0650411	4.15949	4.0971	4.24088	4.28991	4.32414	4.2822	4.2795	4.24671	4.25495	4.28313
CG42542	0.311587	0.0411111	24	0	0.0648877	4.85451	4.91487	4.86201	4.75655	4.77114	4.76274	4.70083	4.74412	4.74816	4.81581
CG9715	0.311587	0.0411111	18	6	0.0644786	3.6872	3.71791	3.73298	3.84155	3.7897	3.66817	3.60474	3.68819	3.80147	3.7067
rho-5	0.311587	0.0411111	24	0	0.0642392	2.44637	2.32965	2.38379	2.30501	2.2928	2.27004	2.28704	2.27018	2.41115	2.29277
Afti	0.311587	0.0411111	18	6	0.0641348	3.11614	3.16753	3.07346	3.20484	3.21213	3.07698	3.10903	3.08623	3.20357	3.12146
S-Lap4	0.311587	0.0411111	18	0	0.0640154	1.16937	1.15973	1.10605	1.01303	1.02495	1.07941	1.03662	1.14179	1.09804	1.04813
Pfrx	0.311587	0.0411111	24	21	0.0636898	6.44552	6.44075	6.43512	6.26912	6.39018	6.39081	6.36902	6.46533	6.51109	6.53289
gammaCop	0.311587	0.0411111	24	15	0.0634869	4.5667	4.67473	4.74596	4.72641	4.80722	4.82606	4.86971	4.75321	4.80768	4.81619
sens	0.311587	0.0411111	24	18	0.0633723	1.4662	1.52764	1.5163	1.41144	1.42482	1.51349	1.56112	1.51784	1.72245	1.5484
CR34044	0.311587	0.0411111	18	12	0.0633723	1.628	1.6293	1.68357	1.73026	1.7663	1.69545	1.8179	1.94936	1.58245	1.65776
Pkn	0.311587	0.0411111	18	6	0.063358	4.73425	4.80163	4.75384	4.83862	4.87064	4.79308	4.64321	4.70406	4.81778	4.7713
zf30C	0.311587	0.0411111	18	9	0.0633552	3.95876	3.8943	3.93543	4.08121	4.05611	3.97465	4.00597	3.98498	3.96888	4.06002
CG14082	0.311587	0.0411111	24	3	0.0631397	1.77636	1.72053	1.65617	1.78356	1.66178	1.58127	1.61966	1.609	1.65126	1.64799
CG10413	0.311587	0.0411111	18	9	0.0629201	4.4547	4.52975	4.50904	4.64454	4.62673	4.54481	4.59407	4.54643	4.55253	4.55151
CG1868	0.311587	0.0411111	18	6	0.0622926	2.22383	2.22593	2.21443	2.33973	2.25723	2.15535	2.18292	2.10286	2.35805	2.22233
atms	0.311587	0.0411111	18	6	0.062055	4.1298	4.2152	4.20691	4.29656	4.37174	4.13848	4.19281	4.19769	4.23339	4.35125
CG32581	0.311587	0.0411111	18	6	0.061845	4.77235	4.82531	4.81873	5.00681	4.98961	4.78903	4.82004	4.7739	4.87111	4.92852
Aac11	0.311587	0.0411111	18	6	0.0613401	5.50155	5.53967	5.56952	5.6103	5.62195	5.5199	5.42661	5.42825	5.5158	5.57133
Npc1a	0.311587	0.0411111	24	9	0.0609993	5.0781	5.00232	4.97173	5.21991	5.12339	4.99089	5.01046	5.03911	4.87096	4.95722
CG40178	0.311587	0.0411111	18	6	0.0605849	4.95103	4.96342	4.9326	5.12752	4.99563	4.86746	4.89024	4.89904	5.05242	4.90595
Pvr	0.311587	0.0411111	18	6	0.0605831	4.62493	4.61578	4.60686	4.71111	4.73489	4.5646	4.62014	4.54845	4.79704	4.66616
CG42390	0.311587	0.0411111	18	6	0.0604138	7.61572	7.67933	7.63104	7.6792	7.74691	7.58942	7.50977	7.58066	7.69587	7.85143
emp	0.311587	0.0411111	24	6	0.0603007	7.64256	7.61535	7.58986	7.79615	7.63802	7.62651	7.56182	7.59645	7.04761	7.3564
Nrg	0.311587	0.0411111	18	9	0.0602354	4.5022	4.43926	4.34607	4.5905	4.54159	4.52641	4.50017	4.52513	4.50873	4.37548
Ge-1	0.311587	0.0411111	18	6	0.060144	4.12746	4.19644	4.16433	4.29257	4.24975	4.15522	4.10645	4.12784	4.2669	4.16991
l(2)NC136	0.311587	0.0411111	18	9	0.0598845	5.07786	5.09553	5.05709	5.27961	5.17984	5.1391	5.14242	5.14217	5.22454	5.09637
Pex14	0.311587	0.0411111	18	6	0.0595727	4.52847	4.50933	4.57811	4.59809	4.67667	4.49076	4.50741	4.47221	4.81908	4.86422
Cp7Fa	0.311587	0.0411111	18	0	0.0590328	1.41951	1.46532	1.64253	1.4153	1.33182	1.39348	1.41741	1.34745	1.44753	1.42696
MED20	0.311587	0.0411111	18	9	0.0588026	2.97462	2.88602	3.0751	3.13887	3.08546	3.10909	3.04565	3.07717	3.00663	3.00009
CG10359	0.311587	0.0411111	24	9	0.0587797	2.8385	2.85848	2.83743	2.95697	2.94161	2.77863	2.88133	2.91355	2.48969	2.80644
Sema-5c	0.311587	0.0411111	18	12	0.0586884	3.30254	3.31254	3.23535	3.26275	3.30286	3.31416	3.43729	3.39303	3.23331	3.24137
Ada1-1	0.311587	0.0411111	18	9	0.0585262	1.09445	1.22074	1.23143	1.35148	1.30886	1.29924	1.29908	1.2998	1.24501	1.32283
Doc1	0.311587	0.0411111	24	0	0.0584678	1.26368	1.37382	1.361	1.27773	1.30022	1.2436	1.16269	1.25046	1.31752	1.33315
CG32982	0.311587	0.0411111	18	6	0.0582812	4.16311	4.19729	4.28077	4.24271	4.32654	4.18145	4.12851	4.09688	4.28976	4.292
CG32267	0.311587	0.0411111	18	3	0.0572893	5.29218	5.25146	5.23872	5.12102	5.2131	5.13837	5.20989	5.10276	5.2539	5.26725
eIF5B	0.311587	0.0411111	18	9	0.0570091	5.06709	5.09435	5.03097	5.13352	5.2146	5.15459	5.10809	5.16691	5.12213	5.12858
CG13837	0.311587	0.0411111	18	12	0.0567409	1.50697	1.57068	1.49369	1.57969	1.54887	1.54748	1.70899	1.66105	1.36044	1.4808
CG6792	0.311587	0.0411111	18	6	0.0563914	2.357	2.32915	2.36155	2.45335	2.48943	2.37046	2.29167	2.33212	2.40761	2.4311
CG33474	0.311587	0.0411111	18	3	0.0561462	3.18671	3.22141	3.1637	3.15905	3.09058	3.06877	3.19589	2.79668	3.3689	3.37641
dpr7	0.311587	0.0411111	24	6	0.055947	4.01116	4.10251	4.04502	4.07774	4.09584	4.02295	4.02591	3.99862	3.91021	3.96399
CG10417	0.311587	0.0411111	18	6	0.0555075	4.70926	4.70774	4.67237	4.89289	4.81388	4.67905	4.68932	4.64435	4.78557	4.69355
CG31191	0.311587	0.0411111	24	9	0.0549811	1.49288	1.5346	1.54754	1.59442	1.62901	1.58052	1.51237	1.59405	1.52225	1.39245
dwg	0.311587	0.0411111	24	18	0.0547548	3.03723	2.86867	3.03952	2.9544	2.96413	3.04157	3.01554	3.07624	3.10006	3.07748
Cpsf100	0.311587	0.0411111	18	6	0.0545784	3.09828	3.07389	3.08908	3.27471	3.26938	3.11439	3.04932	3.06122	3.10423	3.21508
CG33298	0.311587	0.0411111	24	9	0.0539487	3.68796	3.71663	3.6102	3.72793	3.73425	3.69161	3.69561	3.72862	3.6461	3.53682
homer	0.311587	0.0411111	24	9	0.053808	4.85379	4.80031	4.85088	4.96987	4.91818	4.87641	4.82427	4.89428	4.74819	4.83604
CG12241	0.311587	0.0411111	18	6	0.0534976	3.34799	3.35962	3.38168	3.44908	3.48057	3.29983	3.3445	3.36038	3.49619	3.40442
CG14022	0.311587	0.0411111	18	12	0.0532082	8.12388	8.07258	8.22218	8.28767	8.29362	8.29499	8.31558	8.23432	8.21096	8.02605
ena	0.311587	0.0411111	18	9	0.0531529	2.93019	2.93627	3.01553	3.07238	3.13753	3.02311	3.02235	2.94441	3.00889	3.01731
CG13300	0.311587	0.0411111	18	15	0.0531331	1.47804	1.56483	1.50316	1.44266	1.47689	1.64029	1.51691	1.58358	1.49853	1.43008
Nup358	0.311587	0.0411111	24	6	0.0527954	4.72167	4.71772	4.70508	4.76442	4.72445	4.6341	4.57875	4.69172	4.70354	4.61706
His4r	0.311587	0.0411111	18	9	0.0525737	9.09478	9.03348	9.11191	9.17416	9.21827	9.16683	9.13711	9.17518	9.04653	9.16129
Ttc19	0.311587	0.0411111	24	6	0.0525607	6.04086	5.90413	6.01844	6.02253	6.04342	6.01125	5.95998	5.99405	5.82979	5.88752
S	0.311587	0.0411111	18	6	0.0525179	3.57933	3.54192	3.51886	3.59416	3.63482	3.5233	3.48491	3.45204	3.66951	3.56138
HmgZ	0.311587	0.0411111	18	6	0.0519515	6.81373	6.83314	6.8785	7.01372	6.99863	6.81474	6.84737	6.81837	6.87906	6.97267
Nup214	0.311587	0.0411111	18	6	0.0518719	3.30693	3.31281	3.34029	3.40414	3.43094	3.32781	3.25616	3.29747	3.44058	3.37321
CG43729	0.311587	0.0411111	18	15	0.0515461	5.75253	5.78821	5.76903	5.67346	5.71075	5.78559	5.8363	5.82218	5.65014	5.76026
Scsalpha	0.311587	0.0411111	18	15	0.0515338	8.44017	8.41983	8.45083	8.34203	8.26427	8.4773	8.39027	8.4515	8.36226	8.40767
CG3281	0.311587	0.0411111	18	3	0.0511949	2.87323	2.88578	2.83656	2.91669	2.85017	2.76695	2.80477	2.80945	2.95825	2.927
pnr	0.311587	0.0411111	18	12	0.0508767	1.82627	1.811	1.88531	1.81189	1.91045	1.87653	1.91725	1.98882	1.54577	1.77504
CG4662	0.311587	0.0411111	24	3	0.0505801	4.6923	4.66387	4.70624	4.65242	4.69528	4.61957	4.5976	4.61729	4.62017	4.6873
CG43674	0.311587	0.0411111	18	3	0.0504531	6.72336	6.60574	6.54417	6.53231	6.50318	6.45651	6.48828	6.53885	6.78329	6.5656
Bsg25D	0.311587	0.0411111	18	6	0.0501805	4.33157	4.31793	4.25588	4.3887	4.39129	4.30208	4.23478	4.32013	4.34561	4.32927
eIF5	0.311587	0.0411111	18	9	0.0500158	6.17537	6.17495	6.10491	6.24764	6.26587	6.19078	6.19717	6.17641	6.17929	6.2346
Pat1	0.311587	0.0411111	18	9	0.0491985	4.51803	4.53265	4.52403	4.65258	4.62669	4.58686	4.53966	4.57599	4.54955	4.46627
mute	0.311587	0.0411111	18	6	0.0487451	2.6013	2.63933	2.59003	2.72203	2.72045	2.57752	2.61287	2.58229	2.78237	2.64205
danr	0.311587	0.0411111	24	12	0.0487232	1.6835	1.65388	1.61454	1.68478	1.75957	1.69545	1.76226	1.76259	1.67414	1.72279
abs	0.311587	0.0411111	24	9	0.0486829	3.20364	3.26208	3.24665	3.31446	3.29534	3.30746	3.29652	3.25945	3.2026	3.22767
Rhp	0.311587	0.0411111	18	9	0.0485111	2.76563	2.80225	2.83915	2.8928	2.90773	2.84355	2.87375	2.87088	2.8253	2.88866
Cul-4	0.311587	0.0411111	18	6	0.0479385	4.33491	4.38289	4.31397	4.4911	4.40304	4.32588	4.30282	4.34407	4.40974	4.39327
CG8155	0.311587	0.0411111	18	9	0.0462441	3.29473	3.27168	3.29241	3.50727	3.40665	3.30412	3.33372	3.3231	3.37732	3.32037
CG12125	0.311587	0.0411111	18	6	0.0459547	3.2985	3.25835	3.32696	3.31531	3.37364	3.19791	3.25001	3.22675	3.34672	3.37825
Eno	0.311587	0.0411111	18	15	0.0454882	8.97056	8.95791	9.00452	8.9048	8.93014	9.05618	9.03283	8.97042	8.94279	8.88456
alphaTub84D	0.311587	0.0411111	18	15	0.0454454	6.25783	6.28804	6.27502	6.25835	6.16974	6.32679	6.3572	6.33601	6.16065	6.18732
CG4619	0.311587	0.0411111	18	12	0.0451311	5.0049	5.00577	5.09862	5.05904	5.13557	5.13049	5.09557	5.13647	4.97483	4.98001
CG8833	0.311587	0.0411111	18	9	0.0447291	2.60252	2.66766	2.68876	2.81514	2.75129	2.72893	2.63725	2.71326	2.69202	2.70385
mRpL16	0.311587	0.0411111	24	15	0.0442168	5.56722	5.56224	5.60509	5.61755	5.5879	5.76837	5.63451	5.79111	5.57306	5.62976
Chd1	0.311587	0.0411111	24	12	0.0440994	4.21397	4.25108	4.20956	4.31196	4.26057	4.29728	4.27634	4.35629	4.26932	4.22195
CG4822	0.311587	0.0411111	24	9	0.0436193	5.47077	5.41977	5.49256	5.51135	5.71272	5.51574	5.48146	5.51822	5.25299	5.46104
mus304	0.311587	0.0411111	18	6	0.0434558	1.69242	1.74632	1.71077	1.73811	1.77539	1.67656	1.63889	1.67363	1.75637	1.78853
CG11122	0.311587	0.0411111	18	0	0.0425052	2.78158	2.76963	2.80202	2.66624	2.69561	2.74249	2.73832	2.7767	2.79808	2.74731
CG10082	0.311587	0.0411111	18	12	0.0423165	5.18211	5.17602	5.105	5.16482	5.23184	5.26946	5.18956	5.25976	5.13107	5.04086
CG8866	0.311587	0.0411111	24	9	0.0421407	3.10901	3.13428	3.19333	3.20452	3.25746	3.14493	3.15782	3.11982	2.97331	3.10154
CrebB-17A	0.311587	0.0411111	18	6	0.0410661	4.45954	4.43304	4.40583	4.50218	4.44552	4.38582	4.32086	4.37828	4.50433	4.47968
CG6511	0.311587	0.0411111	18	6	0.0410493	2.40409	2.45246	2.44288	2.47516	2.53343	2.39132	2.44733	2.40135	2.5151	2.48569
bsk	0.311587	0.0411111	18	6	0.0410117	4.98924	5.01967	4.99755	5.14904	5.07925	4.96393	4.9844	5.00929	5.01441	5.01349
Ice1	0.311587	0.0411111	18	6	0.0398895	2.06515	2.03186	2.05096	2.11984	2.08829	2.01896	2.01094	1.96862	2.20895	2.16312
RpL4	0.311587	0.0411111	24	21	0.0397825	9.63103	9.63832	9.7261	9.57858	9.59482	9.62572	9.68232	9.62996	9.66984	9.86406
dila	0.311587	0.0411111	18	6	0.0394668	1.33803	1.31158	1.33807	1.43385	1.39219	1.34709	1.29362	1.30451	1.37321	1.41093
Ctf4	0.311587	0.0411111	24	0	0.0392246	1.45573	1.43046	1.47818	1.39641	1.40132	1.33171	1.3466	1.40026	1.42478	1.37162
CG14478	0.311587	0.0411111	18	6	0.0390754	4.78504	4.78895	4.74848	4.80533	4.8387	4.74597	4.71701	4.70194	4.85584	4.75292
CG13995	0.311587	0.0411111	24	0	0.0380487	2.55213	2.46689	2.37177	2.35359	2.37711	2.35206	2.35217	2.36088	2.4074	2.40201
rab3-GAP	0.311587	0.0411111	18	9	0.0376404	3.00085	3.13879	3.15579	3.19603	3.23167	3.18801	3.17806	3.12057	3.16167	3.16219
CG3706	0.311587	0.0411111	24	21	0.03757	1.10799	1.09457	1.11744	1.07097	1.0702	1.1135	1.06177	1.0713	1.16663	1.15348
Aats-pro	0.311587	0.0411111	18	6	0.0374051	3.00604	3.02132	3.03585	3.05727	3.07041	2.99817	2.96041	2.94753	3.14298	3.21193
by	0.311587	0.0411111	18	6	0.0369713	5.51708	5.49179	5.54367	5.52391	5.5442	5.41804	5.42615	5.39094	5.51831	5.60654
ttm50	0.311587	0.0411111	24	21	0.0351899	4.69829	4.65001	4.67144	4.62292	4.63821	4.69681	4.62808	4.67081	4.72994	4.88481
neur	0.311587	0.0411111	24	3	0.0351361	2.45928	2.454	2.48237	2.43479	2.55181	2.41866	2.40959	2.31299	2.44678	2.42247
CG1316	0.311587	0.0411111	24	0	0.0349714	5.10898	5.07777	5.05238	5.02832	5.06264	5.02757	5.02439	5.02669	5.10242	5.04631
Vha100-1	0.311587	0.0411111	18	6	0.0345761	5.73089	5.70747	5.71814	5.76926	5.79708	5.66925	5.7404	5.70355	5.78057	5.74772
Arf51F	0.311587	0.0411111	18	9	0.0344048	6.07087	6.12549	6.19179	6.20163	6.24115	6.17391	6.17298	6.20032	6.13	6.1547
Hsromega	0.311587	0.0411111	24	6	0.0329278	4.08049	4.07775	4.0682	4.21198	4.17198	4.07002	4.09703	4.04143	4.03163	4.03393
iotaTry	0.311587	0.0411111	18	3	0.0316595	1.08428	1.20497	1.09013	1.10655	1.1105	1.01471	1.06564	1.06517	1.2699	1.35292
CG10188	0.311587	0.0411111	18	6	0.0314974	2.72905	2.76121	2.71774	2.7781	2.74127	2.70319	2.67519	2.63224	2.7571	2.76393
Nipsnap	0.311587	0.0411111	24	9	0.0298477	6.76253	6.76962	6.81333	6.8504	6.8112	6.79701	6.77598	6.80474	6.72617	6.74157
CG3530	0.311587	0.0411111	18	3	0.0297869	4.12174	4.16281	4.17779	4.14486	4.17275	4.12033	4.13135	4.05479	4.23426	4.25787
Rbf2	0.311587	0.0411111	18	6	0.0283246	1.28108	1.24904	1.2819	1.29153	1.37114	1.25124	1.24387	1.21334	1.29814	1.27775
drk	0.311587	0.0411111	18	6	0.0281923	4.97176	4.94418	4.96918	5.19812	5.1628	4.94839	4.9567	4.96727	4.9996	5.16706
CG16974	0.311587	0.0411111	24	6	0.0281124	5.2892	5.26663	5.28793	5.26995	5.29142	5.25166	5.23739	5.27767	5.22771	5.16053
CG32111	0.311587	0.0411111	18	6	0.0275878	1.42719	1.39995	1.36212	1.46483	1.43423	1.35778	1.3617	1.40483	1.41071	1.42112
CG31342	0.311587	0.0411111	18	6	0.0271554	4.01594	4.04066	4.01874	4.16486	4.11517	4.03921	4.02213	4.01379	4.10467	4.1139
Aats-ala-m	0.311587	0.0411111	18	3	0.026088	4.03888	3.95917	3.99772	3.97592	3.97718	3.94287	3.94388	3.95056	3.98982	4.03957
CG12413	0.311587	0.0411111	18	3	0.0228689	3.17822	3.18862	3.1511	3.13509	3.17234	3.09193	3.17815	3.12368	3.20824	3.22813
CG3016	0.311587	0.0411111	18	3	0.0200138	4.07771	4.03219	4.06576	4.01793	4.06298	4.01873	4.00718	4.03775	4.08676	4.0906
CG4766	0.311587	0.0411111	18	12	0.0184481	3.09182	3.11444	3.12449	3.10599	3.17332	3.13049	3.13366	3.1765	2.93533	2.97841
CG12860	0.311587	0.0411111	24	0	0.018353	1.02985	1.03362	1.02562	1.00767	1.01763	1	1	1	1.01369	1.11063
Pgm	0.311587	0.0411111	18	6	0.0176266	7.92584	7.93058	7.93876	7.9478	8.07662	7.85349	7.9185	7.92181	7.92292	7.96948
Moca-cyp	0.311587	0.0411111	18	6	0.017403	4.65825	4.67674	4.67859	4.69689	4.73339	4.64451	4.6586	4.65704	4.72654	4.81307
SIP2	0.311587	0.0411111	18	3	0.00831858	1.0286	1.04175	1.06299	1.02626	1.0369	1.02343	1.02482	1.02929	1.09679	1.0434
Acp36DE	0.311587	0.0411111	24	12	0.00797758	1.00623	1	1	1.00635	1.12646	1.00848	1.30224	1.01906	1.00568	1.00791
snoRNA:Me18S-A934	0.418399	0.0616667	18	12	0.142875	1	1.20474	1.1582	1.09613	1.21289	1.35202	1.32317	1.35266	1	1.1189
CG31463	0.418399	0.0616667	18	3	0.010654	1.01385	1.11319	1.01188	1	1.01628	1	1	1	1.14482	1.06063
CG7164	0.418399	0.0616667	18	3	0.00931154	1.01657	1.00937	1.02829	1	1.00977	1	1	1	1.01512	1.04175
CG8147	0.418399	0.0822222	24	3	1.28024	6.57147	8.04717	8.44318	6.83972	7.21165	5.62578	4.76094	4.24778	6.06635	7.88385
CheB93b	0.418399	0.0822222	18	6	1.24159	4.37203	2.29205	2.57782	4.50175	4.32665	2.76714	2.02175	1.87484	3.7741	3.96238
CG9458	0.418399	0.0822222	24	21	1.01809	4.38102	4.46018	3.0457	2.91831	3.13233	1.95658	3.87541	2.99346	4.90077	4.55496
CG11425	0.418399	0.0822222	24	0	0.955202	3.66393	5.25197	5.92543	4.1225	3.91849	3.24418	3.77675	3.05088	4.86031	5.00705
CG17192	0.418399	0.0822222	18	12	0.95083	5.67173	5.59618	5.14172	5.96047	4.63413	7.1759	6.15017	6.99455	5.18854	4.22417
CG15369	0.418399	0.0822222	18	15	0.927371	6.99397	6.92792	6.09001	5.42431	4.42382	7.39965	6.84227	7.33731	6.8821	6.35791
CheB53a	0.418399	0.0822222	18	6	0.87085	2.91225	1.64184	1.80186	3.43817	3.05124	1.887	1.58809	1.78372	2.25329	2.0952
CG6188	0.418399	0.0822222	18	0	0.74655	7.83084	7.4264	8.05505	6.7557	6.50545	6.56554	7.68224	6.78357	7.65358	7.40838
CG32551	0.418399	0.0822222	18	6	0.72708	4.37728	3.54958	3.34454	5.24284	4.59701	3.58794	3.06285	3.4648	4.13641	4.84667
CG43841	0.418399	0.0822222	18	6	0.680362	5.02378	4.24381	3.80672	5.84022	4.99418	4.04944	3.24932	4.02937	4.30189	5.02733
CG13325	0.418399	0.0822222	24	6	0.642758	3.04912	4.19327	3.94709	3.07381	3.8101	2.87813	3.05157	2.40374	2.36754	2.36049
CG8834	0.418399	0.0822222	24	6	0.595369	4.20065	4.89679	4.61254	3.94235	4.67232	3.89298	3.99029	3.90602	2.92729	3.24562
CheB53b	0.418399	0.0822222	18	6	0.593116	2.33359	1.2667	1.51471	2.52405	2.32525	1.56272	1.21535	1.16726	1.82063	1.7862
sxe2	0.418399	0.0822222	24	6	0.568506	5.47909	5.40447	5.03531	5.27376	4.99418	4.78092	4.46977	4.63571	4.06412	4.1927
Jon25Bi	0.418399	0.0822222	18	15	0.564225	5.94505	6.64584	5.95962	5.53735	5.2783	6.39174	7.38004	7.10981	6.07903	4.91561
CG15394	0.418399	0.0822222	18	6	0.547395	4.56909	4.17651	5.24693	5.36185	5.61563	4.35249	5.02606	4.39291	5.46797	5.32779
Ugt86Da	0.418399	0.0822222	24	3	0.523159	5.72685	5.80141	5.78554	5.86192	5.79604	4.98018	5.06156	4.98451	5.09547	5.17792
OS9	0.418399	0.0822222	24	6	0.48999	4.77038	4.80047	4.43967	5.08288	4.49254	4.19352	3.74672	4.49789	3.35461	4.12892
CG18540	0.418399	0.0822222	18	6	0.458881	3.9902	3.81587	3.38921	5.18433	4.0275	3.30174	2.90968	3.59547	3.44768	4.41278
CG4363	0.418399	0.0822222	18	3	0.455544	7.9172	8.01598	8.46136	7.18109	8.30872	7.5624	7.52914	6.91515	8.66552	8.35811
Cyp6a8	0.418399	0.0822222	18	3	0.430375	3.88752	5.67332	4.03123	4.46321	3.99982	3.3813	3.61488	3.68939	5.45908	4.61593
CG6484	0.418399	0.0822222	24	0	0.429956	7.10561	7.50839	7.6248	6.78452	7.17763	6.49756	6.83455	6.31093	7.27198	7.10751
Obp56d	0.418399	0.0822222	18	6	0.412394	8.11539	7.808	7.24912	8.86964	7.85485	7.16903	6.95576	7.64203	7.70518	8.15267
CheB38c	0.418399	0.0822222	18	6	0.400725	3.5991	3.60022	3.43322	5.04851	4.15807	3.26019	2.86651	3.39605	3.28229	4.45318
CG34166	0.418399	0.0822222	24	15	0.39615	8.70869	8.56875	8.3588	8.90489	8.53226	9.33838	9.36318	9.46453	8.91904	8.56757
CG4269	0.418399	0.0822222	18	3	0.388738	3.85707	5.27657	5.25569	4.70973	4.8216	3.76832	4.61628	4.41345	5.41493	5.26606
snoRNA:Psi28S-2149	0.418399	0.0822222	18	9	0.382482	1	1.06789	1	1.60646	1.7684	1.08163	1.14506	1.6088	1.30303	1.1487
CG43774	0.418399	0.0822222	24	21	0.378182	3.21766	3.46731	3.6099	3.25247	3.01997	3.2827	3.1571	2.76027	4.05311	3.89242
CG43448	0.418399	0.0822222	24	12	0.373113	2.40663	2.35651	2.55278	2.84631	3.12124	3.16546	2.85032	2.88418	2.32525	2.56102
Nmdmc	0.418399	0.0822222	18	3	0.369709	5.61786	4.40983	5.82463	5.44316	4.1696	3.71399	4.59439	5.15022	6.39661	6.0676
Pbprp5	0.418399	0.0822222	18	6	0.368362	2.23138	1.45842	1.95264	2.75584	2.42546	1.83772	1.73314	1.90804	2.43161	2.59076
snoRNA:Or-CD10	0.418399	0.0822222	24	18	0.361329	2.19239	2.16516	1.83757	1.55378	2.32868	2.39311	2.309	2.70339	2.74169	2.63234
snoRNA:Me18S-G1358b	0.418399	0.0822222	24	18	0.355504	1.21913	1.24489	1.18982	1.4162	1	1.83379	1.77468	1.41791	2.03359	1.50276
tRNA:CR31356	0.418399	0.0822222	18	6	0.351348	1.75143	1.56734	1.19721	1.96934	1.7684	1.15888	1.27686	1	1.39137	2.2699
Tsp47F	0.418399	0.0822222	18	6	0.345398	2.66669	2.26974	2.0862	3.31996	2.65164	2.03172	1.96269	2.29229	2.31816	2.77509
CG13841	0.418399	0.0822222	24	6	0.338148	4.52918	4.28388	4.31225	4.76689	4.48538	4.00716	3.86515	4.04515	3.88648	4.23843
Prx2540-1	0.418399	0.0822222	24	21	0.335183	4.15956	4.41442	4.55859	4.16406	3.80687	3.8828	4.12047	3.94226	4.62194	4.48842
CG13285	0.418399	0.0822222	24	6	0.32808	3.95936	4.02726	3.83878	3.98536	3.93008	3.57361	3.85186	3.38983	3.45184	3.38691
Mal-A1	0.418399	0.0822222	18	3	0.32709	9.45498	9.67032	9.87406	9.12593	9.92838	9.23797	9.38126	8.87218	10.2583	10.121
CG4288	0.418399	0.0822222	18	12	0.326598	3.1197	3.40526	3.32881	3.01443	3.39473	3.82752	3.66104	3.8492	2.82563	3.08213
Prx2540-2	0.418399	0.0822222	18	15	0.324025	3.09167	3.24377	3.65485	3.01431	3.03626	3.49863	3.8411	3.84144	3.32118	3.37875
CG9400	0.418399	0.0822222	18	9	0.323585	3.12216	3.12578	3.04233	3.782	3.48774	3.64972	3.44831	3.56635	2.90879	3.38224
Jon99Ciii	0.418399	0.0822222	18	15	0.317886	9.09169	9.12664	8.59529	8.68734	7.45557	9.4837	8.76331	9.40319	8.70477	7.95227
CG14694	0.418399	0.0822222	24	9	0.317302	3.27676	3.37488	2.91161	3.99394	3.51377	3.24903	3.18093	3.48356	2.7322	2.92688
Cyp6t1	0.418399	0.0822222	24	12	0.312722	3.72985	3.80376	3.66033	3.9127	4.27015	4.33518	4.10258	4.1638	3.65223	3.8254
CG42821	0.418399	0.0822222	18	15	0.312521	5.00267	4.93326	5.1598	4.70173	4.38525	5.26296	5.1276	6.00947	5.13961	4.9581
CG10659	0.418399	0.0822222	24	21	0.309703	5.85212	6.23311	6.4517	5.35596	5.71081	5.89349	6.36551	6.10826	6.53601	6.41242
Ugt35a	0.418399	0.0822222	24	3	0.304411	4.6724	4.76571	4.65539	4.92487	4.71073	4.26641	4.25521	4.27401	4.32761	4.4041
l(2)efl	0.418399	0.0822222	24	15	0.298869	8.1323	8.07133	8.1202	8.37941	8.27366	8.43711	8.43886	8.71028	8.67201	8.98498
CG14356	0.418399	0.0822222	24	9	0.295249	3.82638	3.91162	4.08616	4.13151	4.5327	4.42997	4.30351	4.24392	3.78457	3.96184
Obp44a	0.418399	0.0822222	18	0	0.294384	5.49982	5.77349	5.67699	5.09708	4.65718	5.58103	5.23522	5.46537	5.28546	5.25997
CG31710	0.418399	0.0822222	24	18	0.285289	3.83818	3.97992	4.02478	4.03951	4.00235	4.32379	4.33489	4.34983	4.51178	4.58715
CG16986	0.418399	0.0822222	24	0	0.281525	6.42929	6.754	6.94334	5.97481	6.35101	6.03116	6.21752	5.93809	6.13378	6.30996
CG9509	0.418399	0.0822222	24	0	0.278343	3.59956	4.21368	3.91922	3.43708	3.62431	3.55675	3.39447	3.27349	4.05978	3.58405
CG2444	0.418399	0.0822222	24	18	0.278093	2.11317	2.5586	2.85586	2.47955	2.53099	2.70346	3.00964	2.56491	2.94137	3.24283
Tal	0.418399	0.0822222	18	0	0.27703	8.20111	8.29899	8.37552	7.84813	7.82934	7.72025	8.03542	7.9388	7.96699	7.93698
CG2909	0.418399	0.0822222	18	3	0.271975	2.83699	3.29439	3.3963	3.28988	3.28023	2.90042	3.00147	2.83688	3.29849	3.42377
Npc2b	0.418399	0.0822222	24	12	0.271253	6.04652	6.24671	6.20908	6.5381	6.41683	6.63032	6.61481	6.74793	6.12793	6.62516
CG13856	0.418399	0.0822222	24	15	0.266952	2.39358	2.55491	2.69741	2.79698	2.57298	2.95051	3.08398	2.96591	2.66024	3.01879
Syx4	0.418399	0.0822222	24	3	0.264446	3.26761	3.46421	3.47679	3.23551	3.55502	2.86153	3.09906	3.03178	3.04431	3.09441
mir-4985	0.418399	0.0822222	24	15	0.261384	1.68619	1.92065	1.79155	2.08234	1.9495	2.05584	2.23712	2.39052	2.41478	2.21149
CG14400	0.418399	0.0822222	24	15	0.260989	4.31195	4.34821	4.41265	4.56849	4.91741	4.90645	4.98975	4.78457	4.68105	4.81091
CG7816	0.418399	0.0822222	18	9	0.259488	5.52079	5.61475	5.84731	6.12054	6.26935	5.83269	6.05874	5.84252	5.79329	5.8673
Fer1HCH	0.418399	0.0822222	18	9	0.252201	10.0188	9.98927	10.0847	10.5242	10.4408	10.4064	10.3524	10.3235	10.3164	10.5551
Ac13E	0.418399	0.0822222	24	6	0.251727	3.62627	3.72757	3.56993	3.57953	3.48162	3.2775	3.23487	3.31444	3.21393	3.11731
CG9747	0.418399	0.0822222	24	12	0.251186	3.03866	3.37839	3.13227	3.27135	3.65964	3.67078	3.6732	3.62869	3.40228	3.30441
CG34056	0.418399	0.0822222	18	9	0.250868	3.10902	3.04268	3.132	3.47932	3.48618	3.32605	3.4839	3.40418	3.467	3.4419
CG15368	0.418399	0.0822222	24	3	0.244295	2.17499	2.19602	1.93041	2.18233	1.8823	1.59861	1.5377	1.78363	1.7158	1.94651
Mal-B2	0.418399	0.0822222	18	3	0.240523	6.50983	6.14457	6.60258	6.63155	6.38857	6.06267	6.22803	6.14259	6.70887	6.79971
to	0.418399	0.0822222	24	21	0.240165	7.97989	8.14614	8.10513	7.46641	7.80532	7.77388	7.76548	7.801	7.99496	8.29177
Cyp317a1	0.418399	0.0822222	24	6	0.238286	3.36185	3.32872	3.27719	3.6311	3.49856	3.08989	3.00295	3.0182	3.07507	3.2587
Mp20	0.418399	0.0822222	24	12	0.237657	8.49437	8.54982	8.47395	8.90652	8.80831	8.97267	8.85365	9.00494	8.62677	8.98052
Tsp42Ed	0.418399	0.0822222	18	6	0.235594	6.45144	6.42093	7.05713	6.74648	7.26131	6.37901	6.48741	6.23327	7.09742	7.24008
CG34034	0.418399	0.0822222	24	0	0.235173	2.90398	2.64832	3.16247	2.6307	2.22662	2.35208	2.03711	2.39063	2.41855	2.38274
CG8485	0.418399	0.0822222	24	0	0.233066	4.47028	4.32793	4.37256	4.02862	4.18065	4.06305	4.00464	4.08314	4.37121	4.44369
Lasp	0.418399	0.0822222	18	3	0.231297	2.70649	2.86626	2.97888	3.04619	2.81145	2.4651	2.63159	2.55934	2.98983	3.08283
CG13082	0.418399	0.0822222	18	12	0.227763	3.46792	3.5086	3.42093	3.45432	3.36852	3.80877	3.70014	3.81829	2.9992	3.08542
CG13056	0.418399	0.0822222	24	3	0.22724	4.4361	4.3182	4.40267	4.64332	4.422	4.01979	4.10064	4.00373	4.28734	4.12111
CG9674	0.418399	0.0822222	18	0	0.227151	7.3247	7.24315	7.26969	7.09075	6.89212	7.04986	6.89241	6.94171	7.10511	7.01581
CG34253	0.418399	0.0822222	24	3	0.224331	2.57657	2.38152	2.56613	2.37488	2.12491	2.06427	2.20541	2.01097	1.85702	2.30438
aay	0.418399	0.0822222	18	3	0.224132	6.8128	6.67275	7.17743	6.9692	6.71423	6.16703	6.63802	6.66644	7.34702	6.86232
CG8086	0.418399	0.0822222	24	3	0.220589	6.41875	6.37003	6.22789	6.48837	6.11394	6.00159	5.91593	6.10527	5.96123	6.11139
Nep2	0.418399	0.0822222	24	0	0.219021	4.7387	4.87694	4.91368	4.54411	4.42896	4.35357	4.26441	4.6808	4.36026	4.73191
CG11897	0.418399	0.0822222	18	6	0.217644	3.50029	4.06555	3.99042	4.2386	4.2993	3.78549	3.837	3.86241	4.23876	4.0442
CG5849	0.418399	0.0822222	24	0	0.216685	3.1108	3.31605	3.42259	2.8858	3.2404	2.80222	2.95085	2.79654	3.07154	3.15248
CG15202	0.418399	0.0822222	24	15	0.215229	5.75345	5.83866	5.79318	5.74964	5.84625	6.1557	6.07149	6.1276	5.87415	6.13729
CG11241	0.418399	0.0822222	24	18	0.215105	3.94924	3.90215	4.00665	3.92881	4.09872	4.24108	4.19373	4.27333	4.26339	4.48481
CG9717	0.418399	0.0822222	18	3	0.213299	3.49168	3.65467	3.74108	3.36135	3.54837	3.24704	3.24578	3.32229	3.7158	3.53492
CG15617	0.418399	0.0822222	24	15	0.210824	6.53535	6.3064	6.34546	6.65039	6.6497	6.81927	6.94541	6.77356	6.94785	6.59978
CG32091	0.418399	0.0822222	24	0	0.210665	4.35705	4.24717	4.41526	4.05778	4.09168	4.04678	4.02019	4.11734	4.21721	4.49612
Mal-A6	0.418399	0.0822222	18	3	0.209714	8.82428	8.88978	9.10324	8.71952	9.17035	8.57511	8.82475	8.50433	9.6752	9.40585
Pgd	0.418399	0.0822222	18	0	0.208534	6.61629	6.70577	6.76123	6.31131	6.42804	6.24583	6.59895	6.42094	6.46811	6.59098
CG31259	0.418399	0.0822222	24	9	0.207228	1.16599	1.30056	1.36298	1.6165	1.60842	1.82342	1.47851	1.45905	1.20434	1.33455
CG15554	0.418399	0.0822222	18	12	0.20698	1.53203	1.65293	1.73044	1.74334	1.69955	2.38605	1.88539	2.00574	1.71817	1.55487
snoRNA:Or-CD12	0.418399	0.0822222	24	18	0.206714	1.21129	1.2362	1.18296	1.11155	1.35418	2.05289	1.25735	1.40389	2.19818	1.48634
CG31200	0.418399	0.0822222	24	3	0.206291	7.28342	7.22316	7.28657	7.19876	7.0611	6.8698	7.00878	7.05956	6.76936	6.91796
Tig	0.418399	0.0822222	18	12	0.205805	4.5163	4.69705	4.40134	4.64742	4.61476	4.89023	4.79829	4.98655	4.60339	4.4405
insv	0.418399	0.0822222	18	9	0.204928	3.45407	3.27788	3.36463	3.60624	3.82115	3.74682	3.4365	3.65151	3.46534	3.48672
7SLRNA:CR32864	0.418399	0.0822222	24	15	0.203767	1	1.06544	1.09834	1.24943	1.06818	1.41837	1.35635	1.3252	1.24806	1.4221
Osi24	0.418399	0.0822222	24	3	0.201347	1.65996	1.77588	1.70094	1.5461	1.72177	1.44039	1.34733	1.37521	1.35788	1.60422
CG34453	0.418399	0.0822222	18	12	0.199434	1.94475	1.82978	1.6766	1.9581	1.77237	2.05796	2.10828	2.25943	1.65341	1.85555
CG7194	0.418399	0.0822222	24	9	0.19869	2.00678	2.13049	2.03072	2.2991	2.50815	2.22951	2.32885	2.31924	1.9291	2.21949
CG32407	0.418399	0.0822222	24	6	0.197481	4.05453	4.1291	4.23997	4.21599	4.27102	3.80279	4.01128	3.7927	3.96705	3.93075
fbp	0.418399	0.0822222	18	0	0.196945	7.06461	7.08562	7.16791	6.79188	6.78034	6.77187	7.04645	6.93872	7.13185	7.0405
CG17097	0.418399	0.0822222	18	9	0.195718	1	1.00296	1	1.00536	2.48879	1.02136	2.00364	1.27411	1.00479	1.23696
CG16749	0.418399	0.0822222	18	0	0.195409	2.95236	3.09903	3.10716	2.82174	2.54461	2.89706	2.59783	3.08376	3.0797	2.91156
Kua	0.418399	0.0822222	18	9	0.195009	3.01337	3.14861	3.18297	3.45886	3.66602	3.3075	3.169	3.30791	3.42403	3.20723
CG6675	0.418399	0.0822222	24	9	0.194801	3.47465	3.70509	3.43193	3.89566	3.51898	3.61021	3.70742	3.84052	3.25434	3.25195
CG7900	0.418399	0.0822222	18	9	0.192566	3.8068	3.96026	3.77104	4.11188	4.0947	4.0278	4.27105	4.10051	3.90844	3.90979
CG9839	0.418399	0.0822222	24	12	0.192331	3.05225	3.13238	3.11521	3.48315	3.27091	3.30134	3.38721	3.6728	3.12709	3.11383
Spn47C	0.418399	0.0822222	18	9	0.192278	5.48586	5.59413	5.64234	6.06493	5.88768	5.71539	5.95957	5.69605	5.80215	5.88011
Dat	0.418399	0.0822222	18	12	0.192038	6.95021	7.06214	7.03268	6.88254	6.99246	7.26981	7.26019	7.2679	6.50118	6.56294
CG34327	0.418399	0.0822222	18	15	0.191545	1.43834	1.38995	1.18519	1.35669	1.14326	1.99412	1.8321	1.48542	1.29472	1.28015
CG30046	0.418399	0.0822222	24	9	0.190296	3.95973	4.09806	4.14533	4.18173	4.45085	4.31889	4.39997	4.28697	3.96868	4.05558
sug	0.418399	0.0822222	24	12	0.189869	4.49811	4.39318	4.24998	4.57688	4.71698	5.05656	4.5185	4.72147	4.32493	4.45947
CG7267	0.418399	0.0822222	24	6	0.189084	7.84618	7.6503	7.90328	7.93112	7.98144	7.49364	7.71594	7.48055	7.44854	7.79247
mir-284	0.418399	0.0822222	24	12	0.18725	3.56582	4.0383	3.38364	4.03751	3.95015	4.17746	4.09419	4.09758	3.7727	4.07491
mfas	0.418399	0.0822222	24	9	0.186919	6.56664	6.6776	6.71555	6.89554	6.97989	6.93112	6.94181	6.88646	6.54816	6.72855
CG2118	0.418399	0.0822222	24	0	0.186601	3.51318	3.4346	3.46594	3.28063	3.24387	3.13372	3.33395	3.12009	3.68587	3.4328
Drip	0.418399	0.0822222	24	9	0.186438	5.43443	5.60061	5.52435	5.70603	5.82673	5.80245	5.86227	5.64032	5.41558	5.56306
mthl2	0.418399	0.0822222	24	9	0.185917	3.26743	2.92431	2.9508	3.03659	3.3452	2.98009	3.31671	3.10436	2.48116	2.79494
Hsp26	0.418399	0.0822222	24	15	0.185555	2.06457	2.23081	2.29463	2.42336	2.4081	2.39848	2.72484	2.49985	2.49323	2.66844
nompB	0.418399	0.0822222	18	6	0.185287	1.55083	1.64663	1.38812	1.85661	1.72834	1.39702	1.45974	1.41805	1.46285	1.71886
CG3603	0.418399	0.0822222	18	0	0.184273	4.98221	5.02979	5.16497	4.68307	4.63632	4.76972	4.89869	4.95127	4.69078	4.79948
CG43647	0.418399	0.0822222	24	6	0.182726	2.10014	2.14493	1.96834	2.21555	2.25969	1.87684	1.898	1.89307	1.83886	2.10581
CG16712	0.418399	0.0822222	18	12	0.182484	8.96913	8.94378	9.15227	9.02823	9.23583	9.27491	9.37639	9.29769	8.94934	9.14016
CG42808	0.418399	0.0822222	24	15	0.180971	8.78871	8.89807	8.86962	8.95627	8.68019	9.14479	9.24753	9.00066	9.04464	9.12144
CG34191	0.418399	0.0822222	18	9	0.179218	4.74718	4.85181	4.7914	5.07757	5.19021	4.93224	5.1145	4.91258	4.99684	4.99837
ppk25	0.418399	0.0822222	18	6	0.178589	1.69888	1.63239	1.43956	1.92427	1.76652	1.51062	1.49384	1.42469	1.59522	1.65964
CG1275	0.418399	0.0822222	24	12	0.178256	5.81355	5.7105	5.84468	6.06564	5.93884	6.17344	6.00876	6.02806	5.72375	5.81388
mbc	0.418399	0.0822222	18	9	0.177782	4.44659	4.4579	4.38307	4.74608	4.66843	4.66994	4.66725	4.70366	4.69046	4.50976
CG31778	0.418399	0.0822222	24	6	0.175943	5.58024	5.44465	5.51425	5.44757	5.51355	5.35409	5.1716	5.33142	4.93345	5.32076
CG8870	0.418399	0.0822222	18	9	0.175694	1.66523	1.61464	1.72239	2.00081	1.95025	1.71527	1.7928	1.99147	1.63709	1.68331
CG32373	0.418399	0.0822222	24	3	0.175317	2.00715	1.95981	2.09875	2.18262	2.01303	1.7651	1.76911	1.70561	1.84764	1.92802
serp	0.418399	0.0822222	18	0	0.174885	2.70745	2.73507	2.79818	2.49247	2.41292	2.55569	2.58886	2.40664	2.53752	2.56395
CG7997	0.418399	0.0822222	18	12	0.174563	6.48484	6.33951	6.55435	6.51756	6.61471	6.69397	6.80084	6.85191	6.52024	6.47797
Ku80	0.418399	0.0822222	18	6	0.174244	2.61152	2.90077	3.04966	3.17682	3.25626	2.84707	2.8709	2.90506	3.04479	3.11045
disco	0.418399	0.0822222	18	0	0.173252	2.61704	2.58096	2.56448	2.37364	2.29545	2.36119	2.2529	2.44627	2.42106	2.3855
Paip2	0.418399	0.0822222	18	6	0.172894	6.75221	6.51248	6.71263	6.80102	6.7495	6.47792	6.37287	6.43805	6.9167	6.58564
Gal	0.418399	0.0822222	24	12	0.172184	3.03395	3.2582	3.11522	3.43042	3.28174	3.38548	3.31098	3.41139	3.12225	3.15064
Cpr	0.418399	0.0822222	18	3	0.169395	7.23471	7.17365	6.81406	6.78573	6.95016	6.43749	7.0007	6.74505	7.34198	7.22818
Obp19a	0.418399	0.0822222	18	12	0.169116	2.54412	2.70423	2.51414	2.80747	2.40342	2.79399	2.70743	3.03592	1.90593	2.27051
sano	0.418399	0.0822222	24	3	0.16811	3.90753	3.94991	3.86936	3.86416	3.74016	3.73134	3.58736	3.65661	3.63161	3.56306
ergic53	0.418399	0.0822222	18	9	0.167983	5.04344	5.03903	5.0519	5.28314	5.33786	5.24277	5.34435	5.21625	5.3271	5.20629
CG34459	0.418399	0.0822222	24	18	0.167263	2.09657	2.20804	2.24751	2.1074	2.27152	2.46736	2.37258	2.27252	2.52893	2.44749
l(2)gd1	0.418399	0.0822222	18	6	0.163282	3.98469	3.84794	4.08684	4.31654	4.24305	3.92168	3.99175	3.98527	4.157	4.17079
CG34424	0.418399	0.0822222	18	9	0.163241	5.69873	5.69333	5.74875	5.97717	6.1305	5.93202	5.81992	5.87949	5.87706	6.01706
CG33301	0.418399	0.0822222	18	6	0.160933	5.17569	5.26095	5.6527	5.30498	5.56186	5.04474	5.09618	5.01456	5.27896	5.41461
CG7110	0.418399	0.0822222	24	6	0.160603	2.85065	2.8762	2.69953	2.85727	2.70652	2.62525	2.50889	2.62352	2.51618	2.53218
CG13795	0.418399	0.0822222	24	9	0.16024	5.05463	4.86504	5.01969	5.24319	5.34534	4.99402	5.24662	5.03537	4.9123	4.80875
Jheh2	0.418399	0.0822222	18	6	0.159868	7.27322	7.46969	7.18944	7.43666	7.41887	7.18458	7.13912	6.91077	7.32337	7.26913
CG11852	0.418399	0.0822222	18	3	0.159471	2.13079	2.40994	1.99968	2.10172	2.13058	1.77002	2.11843	1.88032	2.37571	2.63308
Mlp60A	0.418399	0.0822222	24	15	0.159262	7.32594	7.47862	7.40839	7.53671	7.43028	7.57477	7.65551	7.74021	7.49036	7.96165
CG13437	0.418399	0.0822222	18	6	0.158327	1.75143	1.53316	1.5774	1.82078	1.83817	1.60557	1.47431	1.25821	1.82608	1.87487
Oatp30B	0.418399	0.0822222	18	3	0.157881	4.60171	4.52682	4.50614	4.49379	4.42663	4.30189	4.29525	4.21499	4.60941	4.31977
CG13377	0.418399	0.0822222	24	9	0.154946	3.80137	3.66902	3.70186	3.92569	3.90775	3.71303	3.89972	4.04091	3.68666	3.68059
CG42351	0.418399	0.0822222	18	6	0.154588	6.32005	6.29528	6.5271	6.63182	6.61674	6.29691	6.17172	6.49009	6.41839	6.57767
CG4991	0.418399	0.0822222	24	15	0.154518	3.75541	3.63323	3.69816	3.76788	3.69215	3.82216	3.93283	3.97984	3.80981	4.03056
mei-P22	0.418399	0.0822222	24	15	0.153227	1.72652	1.65185	1.52018	1.77516	1.81779	1.88755	1.86854	2.09662	1.6855	2.05874
CG10249	0.418399	0.0822222	24	6	0.153135	4.18619	4.13846	4.15837	4.15043	4.05634	3.96055	3.94886	3.96962	3.88352	3.85689
Mdh1	0.418399	0.0822222	24	21	0.152948	8.71499	8.66122	8.75764	8.45968	8.50878	8.4741	8.54781	8.46311	8.71663	8.67941
CG4325	0.418399	0.0822222	24	15	0.151351	2.93557	3.00868	2.90736	3.13889	3.16488	3.14718	3.18554	3.32286	3.27492	3.3068
CR43241	0.418399	0.0822222	18	9	0.149124	2.51577	2.44849	2.54141	2.84486	2.73948	2.58353	2.56894	2.77996	2.70863	2.60518
CG12118	0.418399	0.0822222	18	9	0.148526	6.61862	6.54425	6.55181	6.78911	6.88104	6.83054	6.7562	6.73362	6.76052	6.76379
Aut1	0.418399	0.0822222	18	9	0.148486	5.14447	5.17633	5.3077	5.32936	5.54279	5.43038	5.41466	5.42377	5.33392	5.41464
awd	0.418399	0.0822222	24	21	0.148181	8.61238	8.61519	8.71673	8.43311	8.53152	8.47528	8.69433	8.40282	8.77834	8.78487
ave	0.418399	0.0822222	18	9	0.147686	3.691	3.74283	3.83605	4.12416	3.96966	3.99222	3.89674	3.9154	4.00912	3.88776
CG13667	0.418399	0.0822222	18	9	0.147528	2.56286	2.59368	2.58361	2.81556	2.81689	2.57951	2.79903	2.68127	2.6022	2.71288
pinta	0.418399	0.0822222	18	9	0.147199	4.38568	4.36804	4.41969	4.59545	4.8003	4.5014	4.55586	4.62626	4.39486	4.60415
CG1544	0.418399	0.0822222	18	15	0.146499	3.35323	3.51902	3.45434	3.21995	3.19264	3.44617	3.5332	3.60214	3.41181	3.1331
l(2)37Cc	0.418399	0.0822222	24	21	0.145757	5.73185	5.55572	5.77274	5.59855	5.52572	5.44957	5.61943	5.63286	5.91637	5.84632
CG18547	0.418399	0.0822222	24	0	0.145473	5.95621	6.03073	5.99896	5.7226	5.81724	5.53821	5.8966	5.65197	5.8961	5.73904
DhpD	0.418399	0.0822222	18	9	0.144031	4.91032	4.97244	5.09166	5.13414	5.36315	5.1035	5.23342	5.21322	5.0662	5.21106
CG9875	0.418399	0.0822222	18	9	0.142834	1.18246	1.27391	1.17635	1.64791	1.46111	1.35116	1.36974	1.40919	1.35234	1.48152
CG10824	0.418399	0.0822222	24	3	0.141778	4.64919	4.67678	4.66551	4.51874	4.69835	4.29849	4.49784	4.39916	4.48658	4.57058
CG3837	0.418399	0.0822222	24	9	0.140497	3.37483	3.41491	3.45501	3.63078	3.59087	3.55356	3.57774	3.66724	3.37905	3.42979
ATPsyn-gamma	0.418399	0.0822222	18	0	0.140333	8.99912	8.85166	8.9006	8.65224	8.60226	8.79549	8.80115	8.7459	8.65967	8.76494
CR42875	0.418399	0.0822222	18	6	0.139738	1.65407	1.69725	1.70847	1.97774	1.89613	1.62772	1.61602	1.47144	1.607	1.71602
Cyp4d20	0.418399	0.0822222	24	9	0.139637	4.54982	4.49112	4.34881	4.59546	4.588	4.44751	4.58426	4.65548	3.9528	4.35147
Cpr76Bd	0.418399	0.0822222	24	15	0.139352	1.8387	1.70092	1.72676	1.84429	1.84368	2.06682	2.06161	1.92975	1.70903	1.97124
Fas3	0.418399	0.0822222	18	6	0.137528	3.63944	3.58652	3.81446	3.7911	3.87867	3.46459	3.65838	3.35624	3.77451	3.82954
rad50	0.418399	0.0822222	18	6	0.137337	3.12951	3.17864	3.17069	3.4021	3.29449	3.03026	3.01514	3.02404	3.08957	3.15374
Qtzl	0.418399	0.0822222	18	9	0.136834	2.5539	2.82685	2.7983	3.03953	3.02146	2.82652	2.90882	2.99072	2.91496	2.96839
CG6000	0.418399	0.0822222	18	9	0.136577	5.00346	4.90238	4.82737	5.12125	5.25407	5.11344	4.98455	4.96305	4.89836	4.93863
CG10217	0.418399	0.0822222	18	9	0.136461	4.38513	4.35745	4.3182	4.6962	4.57836	4.50742	4.55019	4.46241	4.47882	4.61928
CG10550	0.418399	0.0822222	18	12	0.13615	6.4944	6.68923	6.69879	6.74953	6.62138	6.84218	6.81011	6.9127	6.48758	6.69686
CR12628	0.418399	0.0822222	18	0	0.135273	1.70835	1.56598	1.62616	1.56028	1.3557	1.40486	1.43899	1.40559	1.53769	1.50122
BEAF-32	0.418399	0.0822222	18	9	0.135011	4.0008	3.88384	3.97082	4.19673	4.2291	4.15675	4.05457	4.12458	4.13252	4.18402
thoc6	0.418399	0.0822222	18	6	0.134234	2.50118	2.56681	2.37656	2.75229	2.7151	2.39166	2.48425	2.55961	2.64288	2.73406
CG3165	0.418399	0.0822222	18	9	0.132784	3.18621	3.17939	3.26281	3.51435	3.74479	3.31908	3.28701	3.34163	3.29169	3.52383
vkg	0.418399	0.0822222	18	12	0.132135	4.71232	4.87034	4.95843	4.81739	5.12025	5.0599	5.17078	4.96376	4.37884	4.71312
CG6985	0.418399	0.0822222	24	12	0.130458	2.51747	2.45991	2.54107	2.54292	2.72741	2.59975	2.78141	2.84349	2.76484	2.53536
f-cup	0.418399	0.0822222	18	6	0.130111	4.06142	4.07904	3.99856	4.34272	4.18804	4.00314	3.88825	3.89822	3.98552	4.14575
CG14196	0.418399	0.0822222	24	12	0.129843	4.97708	5.12748	5.16948	5.13301	5.39278	5.32227	5.43741	5.34358	5.23263	5.24795
CG3625	0.418399	0.0822222	24	9	0.129428	5.56083	5.64558	5.59711	5.7807	5.77893	5.83653	5.75994	5.77234	5.56939	5.60425
Adgf-C	0.418399	0.0822222	24	3	0.129425	1.76051	1.90973	1.78452	1.90857	1.78636	1.57747	1.70995	1.57143	1.67868	1.74809
CG6415	0.418399	0.0822222	24	15	0.128871	5.26849	5.15839	5.28075	5.32623	5.36061	5.40919	5.65515	5.54022	5.49428	5.21745
CG11151	0.418399	0.0822222	24	21	0.127689	6.53565	6.5289	6.44612	6.49656	6.34832	6.24243	6.49709	6.41816	6.63685	6.72275
CG10602	0.418399	0.0822222	18	9	0.127118	4.90232	4.9572	4.97575	5.20301	5.25382	5.05874	5.07482	5.0999	5.07508	5.19402
Socs44A	0.418399	0.0822222	18	6	0.126678	3.75367	3.54733	3.74899	3.92878	3.99772	3.67568	3.71986	3.65788	3.9862	3.9399
Galt	0.418399	0.0822222	24	0	0.126042	6.10886	6.09601	6.14726	5.83747	5.92748	5.7543	5.98989	5.806	5.92172	5.98425
CG14007	0.418399	0.0822222	18	6	0.125126	1.33983	1.14917	1.10091	1.55351	1.27857	1.18884	1.0425	1.06965	1.20682	1.41959
dl	0.418399	0.0822222	24	3	0.125041	5.11438	5.20121	5.05393	5.12252	5.06318	4.96725	4.87086	4.94169	4.89932	4.998
ry	0.418399	0.0822222	24	18	0.124614	4.1301	4.27228	4.37347	4.32426	4.11998	4.41609	4.4074	4.50049	4.47963	4.41153
JhI-26	0.418399	0.0822222	24	6	0.124572	4.78722	4.82169	4.87527	5.05492	4.82112	4.70354	4.57628	4.77355	4.61105	4.75962
comm3	0.418399	0.0822222	24	15	0.124394	3.09782	3.0558	3.10364	3.26971	3.18687	3.41521	3.22822	3.44563	3.26107	3.23627
CG31937	0.418399	0.0822222	18	0	0.123593	6.3584	6.31243	6.41931	6.15477	6.2702	6.16063	6.17011	6.15923	6.22807	6.22366
mth	0.418399	0.0822222	24	9	0.12353	3.23915	3.30255	3.36911	3.45072	3.63617	3.46655	3.44707	3.47396	3.22394	3.40233
CG18088	0.418399	0.0822222	18	6	0.123264	1.84087	1.73575	1.99946	1.86643	2.25715	1.67488	1.80544	1.2238	1.92658	2.158
CG14075	0.418399	0.0822222	18	15	0.123258	6.7235	6.42616	6.70506	6.53311	6.57148	6.85763	6.76946	6.83022	6.55942	6.6978
l(3)02640	0.418399	0.0822222	18	0	0.12293	5.96024	5.90281	5.87003	5.66488	5.62278	5.71257	5.89367	5.82746	5.77734	5.93282
boca	0.418399	0.0822222	24	15	0.122651	4.39877	4.40734	4.32362	4.54817	4.56895	4.58079	4.64947	4.6525	4.53938	4.70281
5-HT2	0.418399	0.0822222	24	18	0.122611	2.76029	2.71538	2.7453	2.4953	2.54983	2.88878	2.69385	2.7531	2.95975	2.80773
Dis3	0.418399	0.0822222	18	9	0.12237	2.92193	2.95101	3.07439	3.16492	3.23105	3.22075	3.14047	3.08468	3.13576	3.19999
Hil	0.418399	0.0822222	24	3	0.122098	3.58608	3.69791	3.69371	3.63266	3.53684	3.52523	3.45164	3.44254	3.37172	3.49674
CG11596	0.418399	0.0822222	18	9	0.121698	4.49654	4.48606	4.47109	4.55388	4.71303	4.66333	4.65592	4.66758	4.5998	4.64513
fsd	0.418399	0.0822222	18	3	0.121659	3.27724	3.31782	3.50686	3.43335	3.46419	3.24965	3.28544	3.1243	3.51565	3.62063
nbs	0.418399	0.0822222	18	6	0.121317	3.23169	3.40972	3.30456	3.45864	3.47499	3.23049	3.25261	3.26326	3.2909	3.34527
CG7175	0.418399	0.0822222	18	9	0.121151	3.14518	3.04928	3.26	3.38258	3.38762	3.34544	3.3215	3.23125	3.35498	3.29762
CG10205	0.418399	0.0822222	18	12	0.12088	5.87936	6.25379	6.39692	6.26144	6.53665	6.29138	6.42856	6.73369	5.7683	6.03015
PH4alphaEFB	0.418399	0.0822222	24	12	0.119661	3.95376	4.00822	4.14164	4.07419	4.20469	4.19044	4.38852	4.27278	4.04551	4.12028
CG6287	0.418399	0.0822222	18	3	0.119583	7.63851	7.52192	7.72378	7.48869	7.44542	7.27985	7.54401	7.34373	7.76081	7.55102
fry	0.418399	0.0822222	24	0	0.119425	4.64178	4.62362	4.64953	4.50124	4.46613	4.47301	4.47182	4.46044	4.72934	4.55626
CG42748	0.418399	0.0822222	24	6	0.11921	4.0484	3.95146	3.91703	4.05119	4.01818	3.87934	3.81065	3.80379	3.92962	3.72576
UGP	0.418399	0.0822222	24	3	0.11899	8.51334	8.49969	8.52187	8.37403	8.45844	8.2984	8.39953	8.25631	8.35359	8.22552
CG16936	0.418399	0.0822222	24	12	0.118986	8.21672	8.26312	8.25199	8.29588	8.41746	8.43776	8.41329	8.42834	8.18991	8.36243
tacc	0.418399	0.0822222	18	6	0.118003	6.45578	6.44634	6.28619	6.53222	6.43037	6.20392	6.11171	6.18412	6.46668	6.28725
A16	0.418399	0.0822222	18	9	0.117368	3.76044	3.70951	3.72977	3.89454	3.94843	3.89337	3.92763	3.76453	3.81266	3.91936
Acyp2	0.418399	0.0822222	24	6	0.117245	4.81551	4.87633	4.96639	5.00437	5.00571	4.79336	4.95365	4.75136	4.63319	4.82267
Eip75B	0.418399	0.0822222	24	0	0.116907	3.78231	3.76203	3.68517	3.5967	3.57566	3.55903	3.56485	3.60824	3.81075	3.64723
mRpS18C	0.418399	0.0822222	24	21	0.116771	4.51287	4.39411	4.48114	4.33579	4.34773	4.3381	4.49809	4.3145	4.5443	4.57966
CG11125	0.418399	0.0822222	24	6	0.11667	2.18896	2.15369	2.28864	2.39442	2.38922	2.21495	2.18733	2.13723	1.88663	2.15848
CG31689	0.418399	0.0822222	24	6	0.116098	7.12264	7.19502	7.38561	7.17823	7.24429	7.08455	7.03083	7.19473	6.98047	6.97648
CG5104	0.418399	0.0822222	18	9	0.11491	4.84124	4.84535	4.85172	5.08017	5.06334	4.94816	4.9629	5.00845	4.97204	5.05266
CG6770	0.418399	0.0822222	24	6	0.114618	9.93955	9.97699	9.90268	10.104	10.1108	9.94187	9.84947	9.83828	9.73973	9.91871
CG32354	0.418399	0.0822222	24	9	0.114287	2.71617	2.89812	2.82906	2.90479	2.96664	2.96945	2.932	2.84822	2.68659	2.73762
Gad1	0.418399	0.0822222	18	0	0.114029	6.39086	6.3921	6.33177	6.17891	6.17021	6.25962	6.20678	6.20558	6.29515	6.00847
MICAL-like	0.418399	0.0822222	18	6	0.11386	3.53167	3.66641	3.75738	3.81222	3.99256	3.57145	3.68813	3.64664	3.77296	3.82044
atilla	0.418399	0.0822222	24	3	0.1138	7.31725	7.33213	7.36477	7.24668	7.18278	7.06272	7.17119	7.11134	7.02426	7.27533
Ctr1B	0.418399	0.0822222	18	12	0.113535	4.06942	4.02412	4.21782	4.08261	4.01479	4.14905	4.23658	4.33793	3.98125	3.95527
Octbeta2R	0.418399	0.0822222	24	12	0.113409	3.11304	3.08029	3.07159	3.27949	3.15753	3.33119	3.18604	3.27342	3.04792	3.13964
CG6495	0.418399	0.0822222	24	15	0.113124	3.95762	3.76054	3.94815	3.89017	4.00743	4.16092	4.10006	4.15753	3.89398	4.07701
Cypl	0.418399	0.0822222	18	6	0.112602	3.67745	3.75059	3.86816	3.88606	3.90867	3.62572	3.70391	3.70269	3.86111	3.95425
Liprin-beta	0.418399	0.0822222	18	9	0.112487	5.27517	5.30492	5.34015	5.51913	5.6169	5.32746	5.38729	5.47151	5.355	5.51729
CG11044	0.418399	0.0822222	18	9	0.112168	4.83925	4.88926	4.96346	5.18156	5.07642	5.00243	5.04047	5.09222	4.97495	5.17628
mthl10	0.418399	0.0822222	18	6	0.111122	3.96962	4.00946	4.0751	4.2779	4.19567	3.92786	4.06664	3.98492	4.14876	4.06502
Rpb12	0.418399	0.0822222	18	6	0.111095	6.20541	6.17162	6.29321	6.41879	6.47276	6.13436	6.24303	6.23757	6.31028	6.4487
CG8051	0.418399	0.0822222	24	21	0.110934	3.78851	4.01934	4.13916	3.72906	3.91537	4.01311	3.99011	3.90851	4.147	4.21509
ome	0.418399	0.0822222	18	6	0.110913	3.73255	3.77228	3.88633	3.80232	3.92696	3.43579	3.62629	3.56826	3.87209	3.80466
CG13251	0.418399	0.0822222	18	6	0.110306	1.35338	1.28393	1.19174	1.47454	1.35354	1.16394	1.1468	1.20334	1.20315	1.31623
CG8498	0.418399	0.0822222	18	9	0.110091	5.59848	5.72755	5.63608	5.86066	5.88123	5.78527	5.80736	5.65504	5.78009	5.82065
KH1	0.418399	0.0822222	18	6	0.109999	2.7957	2.95756	2.95837	2.99388	3.08597	2.79422	2.84041	2.80537	3.06812	3.22603
CG42575	0.418399	0.0822222	24	3	0.109523	5.20076	5.28784	5.29717	5.24322	5.20074	5.14564	5.03037	5.10161	5.09049	5.06429
CG3773	0.418399	0.0822222	18	9	0.109172	3.16916	3.23258	3.22743	3.39671	3.50097	3.30647	3.2626	3.3823	3.26521	3.46184
CG33099	0.418399	0.0822222	24	12	0.109065	3.20093	3.39216	3.49	3.46548	3.59376	3.62011	3.56069	3.51821	3.40645	3.4161
CG33275	0.418399	0.0822222	18	9	0.108904	4.12545	4.14188	4.11013	4.34275	4.27635	4.28012	4.26448	4.27567	3.99305	4.27265
CG9601	0.418399	0.0822222	24	3	0.108824	2.56341	2.70418	2.68786	2.63823	2.58907	2.50535	2.51885	2.4625	2.53269	2.42957
snoRNA:Psi28S-3436b	0.418399	0.0822222	18	6	0.108685	1.68007	1.90557	1.85699	1.90839	2.07932	1.71792	1.75903	1.76967	2.01429	2.06579
Sym	0.418399	0.0822222	18	9	0.10863	3.01596	2.99007	3.03672	3.25132	3.25484	3.16463	3.11132	3.09025	3.14871	3.2067
CG10194	0.418399	0.0822222	18	3	0.108585	3.59996	3.53801	3.7429	3.6243	3.63602	3.37127	3.4937	3.47313	3.84716	3.69351
CG5321	0.418399	0.0822222	24	15	0.107646	4.51106	4.36671	4.37421	4.65318	4.52699	4.6867	4.51899	4.79749	4.62033	4.66032
CG6254	0.418399	0.0822222	18	9	0.107577	2.68307	2.7209	2.64728	2.94319	2.89802	2.80152	2.71929	2.8294	2.87205	2.78045
Vti1	0.418399	0.0822222	18	6	0.107209	3.4088	3.34097	3.49224	3.5645	3.61907	3.47624	3.32905	3.35878	3.4986	3.62386
psh	0.418399	0.0822222	24	15	0.106876	4.94881	4.82167	4.93529	5.17706	5	5.08166	5.19483	5.14632	5.04045	5.13175
CG8378	0.418399	0.0822222	18	9	0.106665	4.02163	4.04618	4.03111	4.18949	4.22027	4.03741	4.12848	4.20713	4.06817	4.13619
CG8713	0.418399	0.0822222	24	21	0.106553	2.24217	2.07804	2.14626	1.95421	2.07797	2.05304	2.17775	2.21531	2.39925	2.29286
CG2145	0.418399	0.0822222	18	3	0.106356	6.65987	6.65745	6.62898	6.58258	6.59722	6.42373	6.53226	6.42526	6.6718	6.56783
CG14671	0.418399	0.0822222	24	18	0.106349	4.32993	4.32674	4.3677	4.26196	4.3813	4.34984	4.41769	4.47714	4.61105	4.61294
Krn	0.418399	0.0822222	24	6	0.106057	3.25967	3.24502	3.44972	3.2664	3.46756	3.13304	3.20862	3.21075	3.1008	3.24876
CR43653	0.418399	0.0822222	18	6	0.106054	1.60558	1.60149	1.7471	1.74705	1.79941	1.48366	1.68421	1.38288	1.74905	1.68835
rok	0.418399	0.0822222	18	3	0.105665	4.24056	4.1794	4.12337	4.13647	4.05734	4.0277	3.9763	3.9762	4.33815	4.10808
CG2911	0.418399	0.0822222	18	6	0.10554	2.57796	2.57638	2.43406	2.72453	2.76412	2.50174	2.57338	2.50036	2.63065	2.88215
l(2)37Bb	0.418399	0.0822222	18	9	0.105329	4.81736	4.9102	4.8977	4.93663	5.10608	5.05676	5.02074	5.04906	4.91328	5.04089
CG33090	0.418399	0.0822222	24	6	0.105034	3.78261	3.70755	3.6749	3.81782	3.89331	3.70515	3.57936	3.55215	3.64376	3.63407
CG6776	0.418399	0.0822222	18	9	0.104775	6.82036	6.89334	6.85841	7.16823	7.1353	6.91307	6.97884	6.87475	6.89362	7.07254
CG13950	0.418399	0.0822222	24	18	0.104749	2.40029	2.37686	2.40667	2.30261	2.19822	2.29917	2.62939	2.45923	2.6427	2.46627
CG15626	0.418399	0.0822222	18	9	0.104649	4.93755	4.82331	4.97568	5.1053	5.12922	5.03595	5.08523	5.08586	5.16733	5.01548
CG8026	0.418399	0.0822222	24	18	0.104586	6.28393	6.43448	6.46439	6.19531	6.31881	6.39172	6.41957	6.52833	6.60334	6.5477
Lac	0.418399	0.0822222	18	9	0.104564	5.60609	5.54957	5.63421	5.87494	5.70939	5.69899	5.7862	5.68245	5.63409	5.78424
CG9914	0.418399	0.0822222	18	15	0.104188	7.82872	7.98925	7.97429	7.72166	7.83676	7.92312	8.20411	8.06195	7.77235	7.82524
CG9911	0.418399	0.0822222	18	9	0.104013	5.37341	5.40737	5.44004	5.56551	5.69774	5.45655	5.56717	5.49748	5.44631	5.59379
pyd3	0.418399	0.0822222	18	12	0.102098	4.06594	3.78566	3.84901	3.96284	3.91599	3.90566	4.08619	4.29895	3.77765	3.70624
CG1516	0.418399	0.0822222	18	15	0.102091	6.98103	6.99137	7.13011	6.89015	6.97733	7.11516	7.20515	7.16747	6.6991	6.71945
Cyp308a1	0.418399	0.0822222	18	6	0.101871	1.25409	1.14875	1.11002	1.724	1.34688	1.12331	1.15015	1.16136	1.31716	1.2872
CG33144	0.418399	0.0822222	24	15	0.101862	4.73248	4.74016	4.75591	4.71786	4.80363	4.9072	4.89685	4.87519	4.90587	4.8366
CG15168	0.418399	0.0822222	18	9	0.101783	5.19635	5.32337	5.25708	5.43145	5.69787	5.35253	5.37725	5.39922	5.32303	5.55608
Sry-delta	0.418399	0.0822222	24	15	0.101758	3.45629	3.48072	3.47073	3.66389	3.66649	3.68668	3.71838	3.65289	3.64643	3.67699
eIF-4B	0.418399	0.0822222	18	9	0.101733	7.61802	7.70204	7.66538	7.91049	7.88509	7.79071	7.67937	7.7593	7.56957	7.72182
l(2)37Cg	0.418399	0.0822222	18	6	0.101661	2.6654	2.60322	2.71983	2.82806	2.73545	2.61358	2.48911	2.46562	2.96926	2.90236
CG2991	0.418399	0.0822222	24	6	0.101611	5.45616	5.47995	5.49497	5.38407	5.47165	5.32343	5.36846	5.35127	5.2656	5.31014
Ada2b	0.418399	0.0822222	18	6	0.101548	3.94553	3.90228	4.01113	4.13161	4.09157	3.83269	3.93582	3.87538	3.9317	3.99452
CG6665	0.418399	0.0822222	18	3	0.101416	3.96748	3.85637	4.04985	3.88443	3.94948	3.70875	3.90221	3.76084	3.9933	4.06398
alpha-Man-IIb	0.418399	0.0822222	24	3	0.101239	2.79001	2.85355	2.67782	2.74899	2.64372	2.63675	2.51391	2.6051	2.74332	2.54426
MTF-1	0.418399	0.0822222	18	9	0.101153	3.72005	3.81748	3.84561	4.04133	4.01357	3.95721	3.85571	3.87696	3.96031	3.78043
CG14102	0.418399	0.0822222	18	6	0.101004	2.43944	2.50928	2.48082	2.65725	2.65745	2.54859	2.49362	2.38882	2.57616	2.57439
CG8569	0.418399	0.0822222	18	9	0.100834	3.44192	3.38953	3.41283	3.60132	3.68479	3.56032	3.46086	3.41467	3.50036	3.55754
beat-IIb	0.418399	0.0822222	18	0	0.100737	2.3838	2.34032	2.27986	2.19902	2.16282	2.13389	2.25886	2.18964	2.3005	2.31152
mew	0.418399	0.0822222	24	6	0.100565	3.82377	3.88971	3.77739	3.82682	3.77808	3.82016	3.69308	3.68288	3.61329	3.54426
CG11876	0.418399	0.0822222	18	0	0.100202	7.66248	7.57198	7.56076	7.37634	7.28726	7.52581	7.52213	7.50132	7.47829	7.50779
CG17600	0.418399	0.0822222	18	9	0.100167	2.39951	2.5455	2.65844	2.73349	2.75085	2.72364	2.69742	2.6078	2.53843	2.6986
eIF3-S9	0.418399	0.0822222	24	3	0.100107	6.74564	6.87955	6.90548	6.83838	6.85542	6.73798	6.70999	6.63463	6.67369	6.83212
CG41520	0.418399	0.0822222	18	6	0.0999847	3.33173	3.2639	3.13861	3.54555	3.24839	3.11421	3.11099	3.12872	3.20917	3.41159
CG12214	0.418399	0.0822222	24	6	0.0996052	6.46147	6.35763	6.44792	6.425	6.39832	6.38497	6.298	6.31081	6.09558	6.20436
CG18870	0.418399	0.0822222	18	6	0.0990627	2.62295	2.50631	2.44362	2.71635	2.63899	2.49286	2.46596	2.49692	2.54006	2.5296
tun	0.418399	0.0822222	18	9	0.0989198	3.34816	3.30958	3.12704	3.50101	3.44372	3.45139	3.36097	3.46891	3.36354	3.19664
CG13678	0.418399	0.0822222	24	18	0.0989037	1.06193	1.05255	1.02687	1.04758	1.12469	1.20091	1.13097	1.09407	1.23877	1.47526
lost	0.418399	0.0822222	18	9	0.098868	7.53499	7.57097	7.52836	7.71784	7.78262	7.65698	7.63359	7.67642	7.56587	7.77106
RluA-1	0.418399	0.0822222	24	12	0.0987411	4.74476	4.80962	4.64004	4.87501	4.79592	4.97196	4.87482	4.92308	4.73518	4.74988
U2af50	0.418399	0.0822222	18	6	0.0987217	4.76567	4.88172	4.90379	5.0032	4.99813	4.78476	4.79939	4.83756	4.91863	5.03034
sgg	0.418399	0.0822222	24	15	0.0984151	5.12372	5.14963	5.08356	5.15412	5.18054	5.32897	5.21697	5.33336	5.33265	5.12743
Aldh-III	0.418399	0.0822222	24	12	0.0983465	5.84065	5.89115	5.69857	5.94488	5.82319	5.97973	6.00382	6.03821	5.78444	5.89905
Dscam3	0.418399	0.0822222	18	0	0.0983066	2.26853	2.21081	2.18582	2.00925	2.0336	2.13197	2.0848	2.10343	2.18473	1.97334
CG11590	0.418399	0.0822222	18	9	0.0977869	3.27571	3.19327	3.33076	3.42776	3.42773	3.40138	3.46398	3.29299	3.35579	3.38086
CYLD	0.418399	0.0822222	18	6	0.0976877	4.75447	4.86593	4.80434	5.00014	5.04585	4.85226	4.78593	4.85485	4.91409	4.99599
CG3921	0.418399	0.0822222	18	6	0.0974404	3.10097	3.0495	3.10902	3.26043	3.39671	3.07295	3.16081	3.01996	3.29479	3.19161
hyx	0.418399	0.0822222	18	9	0.0973743	3.83061	3.97552	3.91323	4.08028	4.1079	4.02258	4.07903	4.09462	4.06755	4.09346
bdg	0.418399	0.0822222	18	9	0.0968938	3.19453	3.14041	3.23483	3.40748	3.34437	3.2532	3.28843	3.36837	3.30738	3.33535
Cpr78E	0.418399	0.0822222	18	6	0.0965091	1.42806	1.27474	1.32257	1.54641	1.45945	1.28363	1.41032	1.31605	1.44728	1.41973
CG11317	0.418399	0.0822222	24	3	0.0964699	2.84034	2.76939	2.86433	2.75241	2.7464	2.60998	2.72857	2.71622	2.53191	2.69421
CG1458	0.418399	0.0822222	18	0	0.0963953	7.23994	7.23965	7.28252	7.04622	7.06616	7.1303	7.11889	7.15409	7.03893	7.22407
CG31636	0.418399	0.0822222	24	21	0.0963504	1.08003	1.27393	1.08004	1.02082	1.07849	1.05501	1.05007	1.14679	1.37271	1.22546
CG4332	0.418399	0.0822222	18	6	0.0963097	2.90721	2.93915	3.04785	3.15092	3.0649	2.85968	2.92896	2.91556	3.17441	3.08853
CG7705	0.418399	0.0822222	18	6	0.0963072	3.79681	3.80904	3.83585	3.96934	3.96027	3.77773	3.80082	3.94106	3.90198	3.95527
Scr	0.418399	0.0822222	18	6	0.0961877	2.52548	2.45663	2.35481	2.72012	2.51544	2.40606	2.24858	2.38427	2.50007	2.51427
CG10904	0.418399	0.0822222	18	6	0.0960405	3.41075	3.73429	3.64405	3.7499	3.78904	3.595	3.58482	3.61222	3.68518	3.71943
CR43943	0.418399	0.0822222	24	12	0.0959989	1.94689	1.86305	1.91207	2.03454	2.04783	2.06046	2.06948	1.99382	1.98168	1.75874
CG30157	0.418399	0.0822222	24	3	0.0959551	1.61862	1.58806	1.65184	1.6452	1.60859	1.54001	1.45236	1.38365	1.45302	1.60564
CG4945	0.418399	0.0822222	24	15	0.0955923	5.70671	5.75453	5.66229	5.73097	5.76071	5.81288	5.84388	5.8959	5.8647	5.87627
CG32667	0.418399	0.0822222	24	21	0.0952763	8.25903	8.09188	8.09968	7.72967	7.79742	8.07614	8.13386	8.17587	8.2686	8.20612
CG11771	0.418399	0.0822222	24	12	0.0952657	6.05731	6.00692	6.03409	6.15804	6.16748	6.19204	6.12334	6.1943	5.9561	6.08743
CG33635	0.418399	0.0822222	18	9	0.0952384	2.71707	2.82175	2.74797	2.8966	3.00718	2.88457	2.84986	2.87604	2.82313	3.05709
CG14984	0.418399	0.0822222	18	9	0.0948015	5.72357	5.76475	5.71793	6.03999	6.01283	5.75923	5.8301	5.80155	5.4129	5.77355
DNApol-eta	0.418399	0.0822222	18	6	0.0943295	1.86258	1.99988	1.9267	2.12948	2.06825	1.87037	1.9138	1.91007	1.98841	1.964
Pep	0.418399	0.0822222	18	6	0.0941014	6.42483	6.43382	6.4865	6.56489	6.60652	6.4298	6.24882	6.40063	6.42272	6.54774
CG7277	0.418399	0.0822222	18	9	0.094044	6.75586	6.63298	6.69649	6.792	6.86934	6.86523	6.78421	6.86453	6.73844	6.81745
Vps35	0.418399	0.0822222	18	9	0.0939075	5.5364	5.51324	5.56897	5.69862	5.74931	5.69103	5.62333	5.64951	5.62363	5.70697
CG8009	0.418399	0.0822222	18	9	0.0929078	4.57181	4.61337	4.55958	4.7746	4.76019	4.7032	4.67495	4.59992	4.49275	4.65161
CG10195	0.418399	0.0822222	18	3	0.0928924	3.00942	2.98949	2.96641	2.93406	3.10767	2.84332	2.80697	2.9222	3.09543	3.09925
h	0.418399	0.0822222	18	9	0.0928891	5.48211	5.63688	5.57753	5.71336	5.79562	5.75191	5.70443	5.63111	5.63409	5.69757
mtacp1	0.418399	0.0822222	18	0	0.0927501	7.94389	7.80081	7.92369	7.68189	7.73023	7.79153	7.84121	7.70682	7.82056	7.85651
eIF3-S8	0.418399	0.0822222	18	6	0.0918829	6.25968	6.31311	6.41458	6.41229	6.38529	6.23442	6.20432	6.17205	6.26845	6.35298
Klp64D	0.418399	0.0822222	18	6	0.0918038	4.17138	4.29311	4.26436	4.42203	4.44878	4.29319	4.22057	4.23495	4.29776	4.37426
CG9797	0.418399	0.0822222	18	9	0.0914908	3.80922	3.78334	3.79451	3.96194	4.00357	3.91984	3.88642	3.80487	3.88572	3.92198
AP-47	0.418399	0.0822222	18	9	0.0912534	4.83658	4.87901	4.97588	5.03968	5.10725	4.9989	5.09684	4.98408	4.92722	5.09396
Pcd	0.418399	0.0822222	24	15	0.0912521	5.54665	5.50163	5.57667	5.60364	5.5698	5.57888	5.81254	5.70572	5.61305	5.77713
mRpS18B	0.418399	0.0822222	18	6	0.09107	3.93144	3.94119	3.98492	4.06727	4.18691	3.97228	3.83278	3.85773	4.17329	4.30673
dsh	0.418399	0.0822222	24	12	0.0910202	4.1529	4.18955	4.16018	4.28971	4.34091	4.39185	4.28162	4.43352	4.28825	4.323
CG34370	0.418399	0.0822222	18	0	0.0908367	2.77113	2.7259	2.70672	2.56615	2.52207	2.60955	2.62733	2.67081	2.69203	2.47547
mei-S332	0.418399	0.0822222	24	6	0.0903774	1.62461	1.65481	1.72268	1.73993	1.78425	1.57746	1.60713	1.50011	1.56005	1.6458
CG8613	0.418399	0.0822222	18	9	0.0901073	5.96596	5.96725	5.9746	6.10294	6.02195	6.12789	5.979	6.09835	6.07079	5.97678
Pnn	0.418399	0.0822222	18	6	0.0901027	2.93514	2.80338	2.96583	2.99054	3.0378	2.70292	2.78974	2.9013	2.93068	3.07174
CG13295	0.418399	0.0822222	18	6	0.0900232	4.34631	4.34862	4.47024	4.39718	4.40026	4.26418	4.17912	4.16989	4.38096	4.3473
Oatp74D	0.418399	0.0822222	24	15	0.0896223	3.92849	3.89983	4.01892	3.93736	4.03762	4.14567	4.06662	4.18249	4.06602	3.90324
l(1)G0232	0.418399	0.0822222	18	3	0.0896019	4.8001	4.87765	4.79413	4.81212	4.81927	4.65768	4.6641	4.75393	4.9425	4.85519
sage	0.418399	0.0822222	24	15	0.0894921	2.52591	2.47524	2.52604	2.42369	2.51425	2.6782	2.64082	2.64273	2.59017	2.59882
CG10623	0.418399	0.0822222	24	9	0.0892758	4.7487	4.58922	4.66965	4.91658	4.83373	4.74034	4.63643	4.70515	4.62272	4.5589
l(1)G0230	0.418399	0.0822222	18	0	0.0892362	8.47584	8.41674	8.51523	8.25822	8.27764	8.41363	8.4549	8.32254	8.37816	8.47909
lace	0.418399	0.0822222	18	6	0.0886943	4.16398	4.2697	4.50328	4.19778	4.63316	4.03774	4.13346	4.04451	4.52859	4.4727
lig3	0.418399	0.0822222	18	6	0.0885414	3.70131	3.86545	3.82109	4.01766	3.94458	3.76843	3.76484	3.75554	3.95602	4.01681
CG32506	0.418399	0.0822222	18	0	0.088443	1.80608	1.80468	1.76739	1.61685	1.61007	1.6885	1.68338	1.67114	1.67718	1.62956
CG17454	0.418399	0.0822222	18	9	0.0882031	5.71551	5.72707	5.76041	5.99874	5.89028	5.85677	5.72881	5.78594	5.81068	5.74332
Pten	0.418399	0.0822222	18	6	0.0881136	3.82305	3.81536	3.71352	3.99249	4.00319	3.82093	3.78664	3.78866	3.85161	3.82196
CG9643	0.418399	0.0822222	24	18	0.0879273	3.5611	3.50658	3.62192	3.5622	3.59106	3.60303	3.65767	3.66307	3.88103	3.80603
CG8145	0.418399	0.0822222	24	9	0.0878771	2.79265	2.75499	2.69715	2.91244	2.87926	2.73386	2.87329	2.85486	2.66621	2.78731
CG1344	0.418399	0.0822222	18	6	0.0873821	3.56641	3.65182	3.65038	3.84848	3.79148	3.64837	3.67565	3.55207	3.75197	3.65386
CG2082	0.418399	0.0822222	24	6	0.0873185	6.1898	6.25158	6.24845	6.2831	6.12425	6.11935	6.15895	6.07868	6.1148	6.0621
CG31156	0.418399	0.0822222	18	6	0.0869109	3.20141	3.1175	3.27289	3.28784	3.34713	3.16526	3.07943	3.15355	3.17569	3.32773
SelG	0.418399	0.0822222	18	9	0.0860818	6.16782	6.17608	6.23856	6.31987	6.37223	6.29123	6.29873	6.2969	6.28429	6.38315
Ncc69	0.418399	0.0822222	18	9	0.0858329	4.45049	4.4979	4.40789	4.62227	4.64617	4.52938	4.52916	4.46997	4.41406	4.48307
Catsup	0.418399	0.0822222	18	9	0.0858219	5.0915	5.21926	5.22357	5.33176	5.4752	5.34267	5.2972	5.31218	5.24665	5.38301
dpp	0.418399	0.0822222	24	6	0.0852346	3.20819	3.27882	3.21328	3.33252	3.34446	3.23316	3.08576	3.1741	3.09274	3.19465
CG3520	0.418399	0.0822222	18	6	0.0852265	2.16237	2.05327	2.22574	2.3215	2.22342	2.12261	2.06267	2.03153	2.19314	2.29757
CG2918	0.418399	0.0822222	24	12	0.0848988	5.56049	5.52029	5.54316	5.58562	5.79347	5.66323	5.81657	5.68973	5.68689	5.6423
CG7200	0.418399	0.0822222	24	15	0.0845777	2.77198	2.83927	2.85501	2.93674	2.92522	2.87554	2.98744	3.0624	2.95888	2.99541
CG10710	0.418399	0.0822222	24	15	0.0843939	1.98188	2.11119	2.16079	2.14113	2.12415	2.23131	2.18867	2.28014	2.17044	2.32706
rtet	0.418399	0.0822222	18	9	0.0840287	3.36879	3.49705	3.40248	3.54397	3.59293	3.54684	3.52799	3.41654	3.42361	3.51174
CG12355	0.418399	0.0822222	24	18	0.0839916	3.80044	3.95654	3.95381	3.71844	3.87704	3.90933	3.99582	3.90476	4.08742	4.00888
Su(var)205	0.418399	0.0822222	18	9	0.0839118	5.33486	5.38282	5.3451	5.49451	5.54374	5.45083	5.48312	5.46584	5.45021	5.54592
CG4949	0.418399	0.0822222	24	9	0.0838671	2.04928	2.17722	2.10257	2.24332	2.1955	2.23216	2.18346	2.23003	2.08042	2.10919
vtd	0.418399	0.0822222	18	9	0.0837808	5.37995	5.44772	5.30166	5.6698	5.53888	5.46741	5.43284	5.42754	5.37735	5.4146
rumi	0.418399	0.0822222	18	6	0.0837262	2.47192	2.32224	2.40842	2.58735	2.51083	2.40944	2.29515	2.36808	2.46466	2.43361
ppa	0.418399	0.0822222	18	12	0.083717	3.31841	3.2982	3.12349	3.28245	3.24235	3.42292	3.35376	3.39594	3.18446	3.02141
Pax	0.418399	0.0822222	18	3	0.0837163	6.75504	6.71615	6.74267	6.70831	6.60421	6.60405	6.57209	6.6261	6.63336	6.77369
CG3262	0.418399	0.0822222	18	9	0.0836575	6.28405	6.20263	6.28579	6.43405	6.4576	6.32251	6.27887	6.40323	6.32574	6.29954
CG14589	0.418399	0.0822222	24	18	0.0833962	1.25734	1.40327	1.33692	1.44632	1.33627	1.45486	1.41874	1.45567	1.46634	1.61521
achi	0.418399	0.0822222	18	9	0.0833933	2.07809	2.14337	2.20055	2.34696	2.26795	2.28329	2.21289	2.15623	2.26513	2.20539
tbce	0.418399	0.0822222	18	9	0.0832905	4.73809	4.81198	4.83431	4.98087	4.94093	4.91581	4.87066	4.93734	4.86339	5.10008
GckIII	0.418399	0.0822222	24	15	0.0828114	4.13377	4.16997	4.13771	4.18651	4.21609	4.28911	4.2213	4.2938	4.29166	4.29483
CG7023	0.418399	0.0822222	24	6	0.082793	4.48461	4.47268	4.404	4.44947	4.44982	4.36898	4.30952	4.38324	4.28832	4.31814
Mms19	0.418399	0.0822222	18	6	0.0827683	3.28009	3.30832	3.33929	3.45545	3.4413	3.25702	3.39488	3.28576	3.38277	3.41763
spoon	0.418399	0.0822222	18	3	0.082262	4.52718	4.46518	4.40803	4.52098	4.41512	4.29736	4.3133	4.40236	4.69628	4.46655
CG10747	0.418399	0.0822222	18	6	0.0820562	4.65387	4.61339	4.58861	4.87277	4.80548	4.61593	4.57705	4.67607	4.71729	4.77327
msl-1	0.418399	0.0822222	18	6	0.0819922	3.40494	3.50437	3.40166	3.5504	3.55755	3.39476	3.37987	3.41404	3.59196	3.44215
CG8223	0.418399	0.0822222	18	9	0.0819816	3.88726	3.92292	4.10919	4.12724	4.20509	4.13216	4.16	4.09209	3.98618	4.05298
CG13676	0.418399	0.0822222	18	0	0.08184	1.45591	1.5188	1.48363	1.27974	1.34616	1.43729	1.33818	1.43556	1.39376	1.49457
Pa1	0.418399	0.0822222	18	9	0.0817044	3.59537	3.55432	3.59837	3.73914	3.74334	3.59302	3.68269	3.70006	3.62404	3.68682
ko	0.418399	0.0822222	24	6	0.0815485	3.07475	3.03532	3.01622	3.06455	3.02467	2.96316	2.98574	2.87041	2.89445	2.92723
Ddc	0.418399	0.0822222	18	12	0.0815404	5.53718	5.46751	5.51825	5.48863	5.43372	5.61984	5.57594	5.64046	5.35009	5.36196
CG34228	0.418399	0.0822222	18	6	0.0814363	5.30053	5.33449	5.40966	5.45556	5.46786	5.23383	5.4138	5.28238	5.4111	5.45839
Stim	0.418399	0.0822222	18	9	0.0812741	5.86779	5.90951	5.94659	6.08672	6.10303	5.93456	5.99208	5.97877	5.93008	6.01635
yellow-b	0.418399	0.0822222	24	15	0.0811554	4.35401	4.43047	4.33947	4.54655	4.48263	4.56413	4.58486	4.5335	4.53482	4.58244
CG6426	0.418399	0.0822222	24	12	0.0808067	6.78238	6.84897	6.91576	6.87427	6.93287	7.01672	7.02494	7.22517	6.87951	6.91066
CG10068	0.418399	0.0822222	18	6	0.0807109	4.40439	4.47889	4.5357	4.68441	4.63574	4.48431	4.51358	4.45873	4.55902	4.58923
CG5447	0.418399	0.0822222	18	9	0.0802768	4.26292	4.26713	4.31656	4.41928	4.56009	4.33787	4.40327	4.33452	4.41678	4.40029
bwa	0.418399	0.0822222	24	6	0.0800282	4.09558	4.1735	4.14528	4.1652	4.22983	4.15606	4.00908	4.04373	3.9698	4.08974
CG12851	0.418399	0.0822222	24	3	0.0799455	2.39524	2.33367	2.28437	2.25969	2.17131	2.19912	2.15119	2.16831	2.25222	2.12651
Pex10	0.418399	0.0822222	18	6	0.0798042	3.22189	3.31336	3.32604	3.35725	3.36597	3.17195	3.2241	3.1561	3.38752	3.38299
Hpr1	0.418399	0.0822222	18	6	0.0796017	3.44734	3.43181	3.53959	3.56815	3.65213	3.46264	3.43769	3.41898	3.56587	3.71336
CG6945	0.418399	0.0822222	18	6	0.0794622	2.54508	2.60729	2.60748	2.83256	2.80608	2.58363	2.51867	2.57211	2.5759	2.72998
EDTP	0.418399	0.0822222	24	9	0.0793225	5.10381	5.03626	5.20137	5.25726	5.22396	5.17065	5.13346	5.22389	5.03718	5.11171
ttk	0.418399	0.0822222	18	6	0.0793162	4.2069	4.17307	4.06527	4.33755	4.14984	4.03421	4.01175	4.0609	4.2424	4.13795
Sox14	0.418399	0.0822222	24	0	0.0788474	4.59635	4.74601	4.71356	4.56867	4.65271	4.49939	4.5412	4.49905	4.55505	4.73026
Mst85C	0.418399	0.0822222	18	9	0.0787077	3.73029	3.66993	3.80337	3.82178	3.88924	3.88878	3.81225	3.87798	3.78585	3.82586
vib	0.418399	0.0822222	24	6	0.0783722	4.67369	4.79172	4.73832	4.73294	4.78523	4.67434	4.64848	4.62478	4.62692	4.62211
ninaB	0.418399	0.0822222	24	9	0.0782081	1.85444	1.77117	1.90181	1.96717	1.98902	1.9661	1.94979	1.87466	1.87841	1.83598
CG9393	0.418399	0.0822222	24	18	0.0781982	3.16727	3.4678	3.46982	3.41487	3.44941	3.41726	3.49434	3.52546	3.61657	3.58928
kat80	0.418399	0.0822222	18	9	0.0781388	3.20819	3.33528	3.27352	3.46041	3.44678	3.37782	3.33926	3.30644	3.3571	3.35705
CG31915	0.418399	0.0822222	24	12	0.0781204	2.58926	2.56321	2.49698	2.6834	2.6635	2.61505	2.69051	2.67912	2.55302	2.60788
CG31211	0.418399	0.0822222	18	0	0.0780853	5.51051	5.50686	5.50449	5.39008	5.41631	5.45288	5.32843	5.40288	5.46974	5.40881
prod	0.418399	0.0822222	18	9	0.0779766	3.96471	3.89763	3.91472	4.11	4.13448	3.99454	4.00892	3.95613	3.9772	4.07715
CG18507	0.418399	0.0822222	18	3	0.0776644	4.46142	4.38282	4.44001	4.4848	4.38503	4.32404	4.3268	4.33752	4.4705	4.49198
CG12853	0.418399	0.0822222	18	9	0.0774742	1	1.03011	1	1.18067	1.12163	1.0717	1.158	1.05422	1	1.09934
sd	0.418399	0.0822222	18	6	0.0773833	3.85352	3.90179	3.78438	4.02699	3.98206	3.87929	3.77548	3.89159	3.98837	3.92579
JIL-1	0.418399	0.0822222	18	9	0.0769698	3.73104	3.78491	3.69241	3.91068	3.81859	3.84755	3.7987	3.89501	3.82608	3.73622
CG1399	0.418399	0.0822222	18	6	0.0765883	3.65522	3.74425	3.82181	3.743	3.97564	3.63897	3.63102	3.56385	3.87111	3.78076
CR31451	0.418399	0.0822222	24	3	0.0765189	5.08024	5.05291	5.00483	4.99016	4.97702	4.89162	4.85721	4.95889	4.8794	5.01742
lt	0.418399	0.0822222	18	9	0.0761087	5.27705	5.28672	5.30706	5.46162	5.46011	5.34742	5.29635	5.40188	5.26896	5.31782
CG17680	0.418399	0.0822222	18	9	0.0756399	5.48409	5.45107	5.42141	5.62419	5.56866	5.54753	5.49849	5.58044	5.39747	5.54353
Mtpalpha	0.418399	0.0822222	24	21	0.0753938	6.43235	6.39541	6.37834	6.35415	6.18124	6.28878	6.45005	6.38224	6.52223	6.49286
CG7967	0.418399	0.0822222	18	6	0.0753709	5.68494	5.67274	5.76876	5.90433	5.97273	5.66641	5.67902	5.72519	5.82738	6.04506
CG5549	0.418399	0.0822222	18	0	0.0750794	2.34974	2.358	2.35116	2.19213	2.16727	2.31336	2.25293	2.32023	2.29305	2.21259
Trl	0.418399	0.0822222	18	9	0.0750449	2.95849	3.01405	3.06237	3.15713	3.23182	3.12503	3.05978	3.04676	3.01499	3.08764
vap	0.418399	0.0822222	18	9	0.075012	3.67105	3.64749	3.68329	3.82197	3.91398	3.71094	3.76505	3.6952	3.75354	3.79886
stg	0.418399	0.0822222	24	9	0.0747348	1.28412	1.28747	1.2384	1.38981	1.42113	1.27678	1.4429	1.32404	1.27005	1.22534
CG17333	0.418399	0.0822222	18	0	0.0743979	5.67013	5.72381	5.7347	5.58233	5.59177	5.5273	5.68015	5.63146	5.70453	5.71534
PCID2	0.418399	0.0822222	18	9	0.0742941	2.93262	2.82198	2.89903	3.00526	3.06659	2.9011	3.01022	3.0015	2.9778	2.91506
Duox	0.418399	0.0822222	18	15	0.0741055	3.15078	3.29667	3.25568	3.24431	3.14327	3.39174	3.3415	3.41244	3.2165	3.25772
stwl	0.418399	0.0822222	18	9	0.0740945	2.4542	2.46511	2.45795	2.63662	2.5744	2.46166	2.52531	2.56248	2.42779	2.50852
CG1622	0.418399	0.0822222	18	6	0.0739952	3.39496	3.41718	3.44121	3.5374	3.58218	3.38852	3.36283	3.47841	3.53118	3.70911
RpS8	0.418399	0.0822222	24	21	0.0739711	9.60901	9.68008	9.74518	9.58401	9.61766	9.63065	9.67961	9.62321	9.74202	9.8558
RhoGAP71E	0.418399	0.0822222	18	3	0.0738637	3.00287	3.05229	3.0274	3.05165	3.06521	2.90856	2.96648	2.8646	3.21072	3.06556
pix	0.418399	0.0822222	18	6	0.0736726	7.00562	7.04801	7.1098	7.10982	7.11418	6.98138	6.97247	6.98477	7.00514	7.19396
CG6664	0.418399	0.0822222	24	15	0.0733842	4.36925	4.3092	4.4143	4.39297	4.28998	4.49093	4.5048	4.47303	4.41218	4.41532
Dgkepsilon	0.418399	0.0822222	18	9	0.0731527	4.95504	4.97093	4.96909	5.09504	5.13068	5.05199	5.06917	5.04494	5.0381	5.14709
CG8319	0.418399	0.0822222	18	6	0.0731414	2.33884	2.23925	2.35818	2.39068	2.51055	2.32292	2.33524	2.22215	2.42725	2.52474
CG42561	0.418399	0.0822222	18	3	0.0730286	2.1538	1.79101	1.8915	1.81404	1.73	1.68537	1.78729	1.74937	1.96903	2.10121
CG42233	0.418399	0.0822222	24	9	0.0728171	2.35852	2.38891	2.31587	2.4615	2.51207	2.45259	2.41811	2.46583	2.43512	2.312
Hlc	0.418399	0.0822222	18	6	0.0725757	5.62427	5.69132	5.75019	5.76967	5.76537	5.66488	5.62311	5.56273	5.65069	5.74821
mrj	0.418399	0.0822222	18	9	0.0723957	4.71604	4.70518	4.70934	4.87893	4.82616	4.80732	4.80781	4.80442	4.80712	4.8385
Mcm2	0.418399	0.0822222	24	12	0.0720952	1.43183	1.48115	1.51383	1.5512	1.62	1.56393	1.60641	1.56759	1.46197	1.5321
CG9485	0.418399	0.0822222	18	6	0.071614	6.48252	6.49685	6.56252	6.60922	6.6839	6.48232	6.51904	6.41127	6.72922	6.63147
CG6171	0.418399	0.0822222	18	6	0.0715903	3.61606	3.67103	3.72686	3.77649	3.89078	3.62983	3.68115	3.65835	3.75041	3.87279
CG9967	0.418399	0.0822222	24	6	0.0715585	2.40923	2.44145	2.54713	2.57355	2.55758	2.45638	2.49768	2.37294	2.3059	2.37379
pncr013:4	0.418399	0.0822222	18	9	0.0710177	3.16397	3.18487	3.21546	3.36529	3.347	3.25871	3.26765	3.24241	3.38011	3.24038
Vha13	0.418399	0.0822222	24	21	0.0708938	8.35832	8.41035	8.37437	8.13605	8.31261	8.28583	8.37185	8.26985	8.39466	8.40273
ex	0.418399	0.0822222	24	6	0.0707736	3.82772	3.75516	3.74313	3.90009	3.81531	3.80458	3.71522	3.6676	3.72674	3.613
crl	0.418399	0.0822222	18	6	0.0705714	5.66473	5.76742	5.75063	5.93653	5.86349	5.75995	5.74744	5.74826	5.80545	5.93184
CG12716	0.418399	0.0822222	24	15	0.0705297	1.14878	1.21195	1.17878	1.26665	1.22695	1.25988	1.27852	1.40544	1.44703	1.22967
drpr	0.418399	0.0822222	18	6	0.0703196	4.93218	4.91815	4.96523	5.05366	5.10728	4.90487	4.99794	4.90722	4.99612	5.10501
BCL7-like	0.418399	0.0822222	18	6	0.0698321	2.61481	2.55724	2.56791	2.76727	2.69947	2.55555	2.57395	2.64859	2.68019	2.67956
CG31249	0.418399	0.0822222	18	6	0.069802	3.14699	3.17329	3.25177	3.21932	3.38555	3.07502	3.02498	3.17374	3.25451	3.36644
RpS5b	0.418399	0.0822222	18	6	0.0697204	1.24984	1.18277	1.14803	1.2774	1.38285	1.17483	1.19945	1.10763	1.31196	1.22429
CG3338	0.418399	0.0822222	24	9	0.0696868	3.33099	3.17121	3.30365	3.36629	3.43152	3.37135	3.40582	3.38241	3.28386	3.29609
Hrb98DE	0.418399	0.0822222	18	9	0.0695646	6.03753	6.10449	6.04961	6.23133	6.20325	6.15725	6.11366	6.12056	6.15669	6.18896
CG13562	0.418399	0.0822222	24	12	0.0695114	1.23307	1.1926	1.1157	1.2909	1.27049	1.23781	1.29765	1.36659	1.2682	1.16837
arm	0.418399	0.0822222	18	9	0.0694701	6.1011	6.13743	6.14649	6.21128	6.27054	6.21892	6.25239	6.20563	6.18198	6.23338
CG6638	0.418399	0.0822222	18	3	0.0692063	3.7966	3.7012	3.82257	3.57968	3.61977	3.45103	3.76231	3.55297	3.81391	3.81156
CG12713	0.418399	0.0822222	18	6	0.0688665	1.82702	1.98236	1.93019	1.98498	2.06519	1.81309	1.96129	1.80413	1.95485	2.02145
CLIP-190	0.418399	0.0822222	24	6	0.068793	5.74004	5.74861	5.66543	5.8826	5.75095	5.65713	5.64721	5.62967	5.64275	5.67302
Sdc	0.418399	0.0822222	18	6	0.0687456	5.93096	5.98341	5.92039	6.09422	5.99592	5.81296	5.95514	5.877	6.23612	6.0504
CG7461	0.418399	0.0822222	18	0	0.068709	7.26664	7.27236	7.25814	7.23796	7.08689	7.13048	7.19318	7.17862	7.23754	7.21419
CG18428	0.418399	0.0822222	18	3	0.0686802	3.79912	3.82291	3.89132	3.76408	3.86613	3.68724	3.59967	3.86399	3.93963	3.91972
CG11562	0.418399	0.0822222	18	3	0.0686781	3.98026	4.08333	4.13469	4.02092	4.09168	3.909	4.04249	3.93613	4.14963	4.24581
crc	0.418399	0.0822222	24	9	0.0684762	8.78542	8.84098	8.78424	8.91853	8.93078	8.90289	8.82369	8.8979	8.7366	8.89678
Orc5	0.418399	0.0822222	18	3	0.0683553	1.57962	1.58039	1.53524	1.55967	1.62932	1.4511	1.52465	1.44657	1.68321	1.58215
CG32813	0.418399	0.0822222	24	12	0.0682733	3.8396	3.88152	3.88528	3.94179	4.05015	4.07398	4.00532	3.95486	3.9536	3.99398
CG2941	0.418399	0.0822222	18	9	0.068221	2.07096	2.06314	1.9977	2.21007	2.21974	2.12087	2.07585	2.08658	2.17835	2.05935
l(2)k14505	0.418399	0.0822222	24	15	0.0681043	4.42764	4.40881	4.45635	4.48067	4.4646	4.55266	4.58167	4.52776	4.44771	4.56835
CG4287	0.418399	0.0822222	18	6	0.0680771	5.4828	5.45415	5.54362	5.6685	5.7003	5.52001	5.48688	5.47369	5.56175	5.56323
Zasp52	0.418399	0.0822222	24	15	0.0679084	8.3157	8.39819	8.37693	8.3451	8.42285	8.57249	8.42583	8.51863	8.38736	8.47296
ssh	0.418399	0.0822222	24	21	0.0677635	4.55263	4.67298	4.65236	4.47986	4.54233	4.6566	4.52633	4.66832	4.70597	4.76338
Mitf	0.418399	0.0822222	18	9	0.0676291	4.77153	4.88747	4.73145	4.96218	4.94219	4.9191	4.84637	4.85839	4.90749	4.77498
Acon	0.418399	0.0822222	18	12	0.0671256	11.1314	11.027	11.0353	11.0566	10.9873	11.2073	11.0891	11.1326	10.9224	10.789
CG10144	0.418399	0.0822222	18	6	0.0670687	2.79097	2.78139	2.87411	2.91192	2.93756	2.78344	2.83433	2.7222	2.96749	2.90791
CG3301	0.418399	0.0822222	18	15	0.066847	6.12693	6.22818	6.12292	6.05766	5.83446	6.13869	6.12629	6.20638	5.99949	6.09646
Lrch	0.418399	0.0822222	18	9	0.0668099	2.78267	2.74946	2.64401	2.88865	2.91766	2.79845	2.78725	2.72699	2.78534	2.7539
CG14967	0.418399	0.0822222	24	6	0.0667403	3.05445	3.04051	2.98468	3.15104	3.05422	2.95	2.94612	2.97324	3.01494	2.91258
CG10674	0.418399	0.0822222	18	9	0.0666812	5.14595	5.13188	5.10758	5.23472	5.42073	5.2123	5.15325	5.22802	5.15801	5.418
CG31029	0.418399	0.0822222	18	0	0.0666726	1.38324	1.34103	1.37808	1.28197	1.2522	1.26173	1.26434	1.33948	1.30156	1.27071
CG10979	0.418399	0.0822222	18	9	0.0664256	3.2149	3.29393	3.17929	3.36803	3.44364	3.30093	3.29733	3.28114	3.33846	3.2532
RpS9	0.418399	0.0822222	24	21	0.0662679	9.23118	9.2333	9.34878	9.21422	9.13746	9.22273	9.29547	9.2501	9.34196	9.44764
TM9SF4	0.418399	0.0822222	18	9	0.0661143	4.69638	4.71885	4.77466	4.82402	4.91902	4.81117	4.81481	4.77575	4.76316	4.82489
CG7196	0.418399	0.0822222	24	0	0.0659123	1.45606	1.40271	1.26891	1.34947	1.34858	1.25096	1.23981	1.34708	1.39488	1.39197
CG4294	0.418399	0.0822222	24	3	0.0655644	4.14947	4.14123	4.16195	4.1598	4.15465	4.10045	4.03766	4.03999	4.12437	4.0546
CG1597	0.418399	0.0822222	24	12	0.0655382	3.70442	3.7721	3.75716	3.74567	3.83757	3.84984	3.88901	3.90408	3.7091	3.8247
CG8924	0.418399	0.0822222	24	3	0.0652278	2.28356	2.24637	2.30538	2.24313	2.20104	2.24186	2.13669	2.1628	2.10215	2.17104
CG31548	0.418399	0.0822222	24	0	0.0650453	5.86263	5.77107	5.89907	5.75186	5.76096	5.70467	5.79474	5.7004	5.85295	5.76192
gish	0.418399	0.0822222	18	9	0.0649527	4.65277	4.64771	4.64896	4.79291	4.77212	4.70029	4.68433	4.7402	4.98249	4.67041
CG2865	0.418399	0.0822222	24	18	0.0648877	2.69017	2.7409	2.76195	2.64694	2.68799	2.7984	2.81705	2.76002	2.84737	2.75581
Pbp45	0.418399	0.0822222	18	6	0.0648622	1.67956	1.69404	1.62186	1.73434	1.78973	1.68872	1.64802	1.53669	1.7482	1.7671
CG12025	0.418399	0.0822222	24	12	0.0648587	6.10208	6.10077	6.03774	6.21762	6.15017	6.18909	6.18832	6.16183	6.12251	6.0701
Ilk	0.418399	0.0822222	18	9	0.0644982	6.00173	5.99043	5.9913	6.11679	6.16117	6.05985	6.08186	6.02887	6.00222	6.26394
CG17802	0.418399	0.0822222	24	6	0.0639486	2.10114	2.2142	2.09917	2.13297	2.22559	2.17402	2.07743	2.09991	1.98934	2.02458
CG4768	0.418399	0.0822222	18	9	0.0635486	3.64902	3.68983	3.6694	3.77693	3.77391	3.57729	3.7487	3.76838	3.72408	3.73226
klar	0.418399	0.0822222	18	9	0.0631362	4.09544	4.12394	4.16324	4.27862	4.2355	4.23595	4.19065	4.20057	4.22902	4.21028
ytr	0.418399	0.0822222	18	9	0.0631254	5.07584	5.18441	5.12517	5.28819	5.27477	5.19174	5.20733	5.20434	5.16736	5.28675
CG42694	0.418399	0.0822222	24	9	0.0630895	2.15532	2.19809	2.19163	2.28731	2.3433	2.16641	2.25759	2.18386	1.92518	2.15982
msn	0.418399	0.0822222	18	9	0.062941	4.91036	4.91053	4.90382	5.05914	5.05901	4.97283	4.95611	4.93492	5.04592	4.96561
Npl4	0.418399	0.0822222	24	12	0.0628406	10.9455	10.8785	10.9708	10.9419	11.0272	11.0983	11.038	11.0706	10.9245	11.02
CG5850	0.418399	0.0822222	18	9	0.0628126	4.42466	4.38367	4.41688	4.50536	4.55993	4.43258	4.46571	4.51779	4.50914	4.44481
CG32473	0.418399	0.0822222	18	9	0.0626168	4.00066	3.93957	3.94024	4.13043	4.04638	4.0284	4.08893	3.97337	4.01205	4.0376
cdc16	0.418399	0.0822222	18	6	0.0625128	2.63467	2.53017	2.56551	2.66457	2.78106	2.57826	2.53399	2.57788	2.65932	2.63664
aub	0.418399	0.0822222	24	9	0.062306	1.20873	1.12454	1.12455	1.33527	1.2274	1.15662	1.17994	1.25047	1.14722	1.11843
Rapgap1	0.418399	0.0822222	24	6	0.0618245	3.9771	3.83991	3.75771	3.9251	3.84098	3.78132	3.75893	3.76636	3.75248	3.71232
CG11984	0.418399	0.0822222	24	15	0.061804	7.16469	7.11324	7.22998	7.16455	7.2382	7.32058	7.25664	7.26153	7.17195	7.25935
P5cr	0.418399	0.0822222	18	15	0.0617958	4.86416	4.99009	4.87821	4.84676	4.67579	4.92364	4.90432	4.98982	4.87017	4.80639
CG32944	0.418399	0.0822222	24	3	0.0616166	2.7484	2.81727	2.88186	2.70727	2.67491	2.67082	2.66177	2.63389	2.73013	2.61498
CG14614	0.418399	0.0822222	18	6	0.0614836	4.23498	4.17437	4.19166	4.37913	4.31985	4.20528	4.14037	4.20699	4.23422	4.24502
S6k	0.418399	0.0822222	18	9	0.0613714	4.83841	4.82891	4.88118	5.01678	4.98723	4.88231	4.9048	4.91285	4.97612	4.90818
Hnf4	0.418399	0.0822222	24	21	0.0613691	5.04616	5.0403	5.06634	5.06602	4.92064	4.95937	4.98993	5.03229	5.10547	5.17149
CG4203	0.418399	0.0822222	18	9	0.0612077	3.0558	3.08872	3.11468	3.21247	3.20383	3.16458	3.17312	3.16367	3.12125	3.28873
CG7945	0.418399	0.0822222	18	9	0.0610276	5.36645	5.3502	5.37321	5.53982	5.56634	5.41173	5.40512	5.40604	5.36068	5.53159
PRL-1	0.418399	0.0822222	18	3	0.0609705	6.44713	6.43611	6.41554	6.50387	6.40411	6.32748	6.22448	6.41757	6.65057	6.51029
sphinx	0.418399	0.0822222	24	0	0.0606889	1.3218	1.3398	1.32817	1.27577	1.21898	1.25878	1.13119	1.27108	1.29618	1.39789
CG1172	0.418399	0.0822222	18	6	0.0605879	3.12222	3.02872	3.11272	3.16502	3.1977	3.062	3.0406	3.05358	3.19076	3.17383
sax	0.418399	0.0822222	24	6	0.0603388	4.11035	4.11763	4.18234	4.22183	4.21538	4.07064	4.07919	4.10451	4.04418	4.13004
RpL8	0.418399	0.0822222	24	18	0.0602504	9.27737	9.32594	9.41115	9.23151	9.26273	9.3271	9.39159	9.33939	9.37551	9.54407
CG6696	0.418399	0.0822222	18	0	0.0597686	1.21809	1.22639	1.29395	1.13221	1.15152	1.21725	1.04416	1.17449	1.18571	1.25271
CG5390	0.418399	0.0822222	24	21	0.0595745	7.2868	7.2064	7.31698	7.26127	7.17702	7.18838	7.29006	7.26898	7.35707	7.41336
CG7369	0.418399	0.0822222	24	6	0.0594097	3.00676	3.05704	2.93419	3.15202	3.05962	3.04677	2.9884	2.90918	2.92274	2.92481
SNF4Agamma	0.418399	0.0822222	18	3	0.0593436	5.22887	5.1415	5.16349	5.20358	5.17933	5.09522	5.11984	5.07278	5.33022	5.22738
Pex13	0.418399	0.0822222	24	18	0.058914	4.38343	4.44683	4.46301	4.40604	4.39704	4.43487	4.47769	4.51965	4.58382	4.50753
Poc1	0.418399	0.0822222	18	6	0.0586725	2.11737	2.15995	2.11748	2.20348	2.25892	2.13442	2.12354	1.94789	2.25157	2.18994
mRpL22	0.418399	0.0822222	24	21	0.0586326	4.64697	4.66055	4.59299	4.57852	4.59456	4.48722	4.60784	4.58793	4.78022	4.74053
CycH	0.418399	0.0822222	18	6	0.0577109	2.77157	2.77265	2.78075	2.85831	2.91258	2.73542	2.84057	2.66759	2.84032	2.87649
jumu	0.418399	0.0822222	24	6	0.0575712	1.89943	1.75917	1.8051	1.91481	1.87385	1.84442	1.83339	1.7465	1.74	1.63025
Ranbp16	0.418399	0.0822222	18	6	0.0573768	3.61319	3.54366	3.55887	3.76078	3.67365	3.59194	3.59306	3.5312	3.66782	3.59822
Rab27	0.418399	0.0822222	24	3	0.0573633	1.35071	1.45867	1.48077	1.38434	1.41487	1.30056	1.35115	1.32995	1.35668	1.34775
CG43143	0.418399	0.0822222	24	12	0.0572488	4.61969	4.59784	4.5045	4.67597	4.62405	4.70065	4.65312	4.75608	4.66093	4.57245
CG14252	0.418399	0.0822222	24	6	0.056816	2.70905	2.67914	2.45141	2.7859	2.74752	2.70555	2.64113	2.66419	2.45064	2.59402
Hel89B	0.418399	0.0822222	18	9	0.0566965	4.16123	4.17483	4.17195	4.36584	4.34504	4.19657	4.19052	4.23749	4.20868	4.24333
Nedd4	0.418399	0.0822222	24	9	0.0566138	4.82503	4.77235	4.79166	4.91772	4.86354	4.87569	4.87172	4.84341	4.82898	4.74224
spas	0.418399	0.0822222	18	6	0.0565252	3.17159	3.12178	3.09964	3.24759	3.17437	2.99094	3.05501	3.12746	3.26892	3.22504
RpL11	0.418399	0.0822222	24	21	0.0563126	9.98208	9.9671	10.0368	9.92635	9.80561	9.91025	10.0049	9.9479	9.98989	10.1773
Ark	0.418399	0.0822222	24	6	0.0554478	3.76631	3.76625	3.69157	3.84523	3.83649	3.75936	3.67705	3.69575	3.68201	3.69207
CG32521	0.418399	0.0822222	24	12	0.0552887	6.71103	6.65749	6.71914	6.69872	6.76658	6.79362	6.85157	6.78482	6.67959	6.72949
HLH106	0.418399	0.0822222	18	6	0.0548628	7.12152	7.07609	7.16978	7.14494	7.22285	6.97055	7.07195	7.04898	7.10156	7.24657
CG7457	0.418399	0.0822222	18	9	0.0548162	2.68375	2.7389	2.73276	2.92115	2.84962	2.73513	2.75821	2.76342	2.73398	2.77437
CG8547	0.418399	0.0822222	18	9	0.0546615	7.88077	7.90781	7.89758	8.05403	8.01746	7.94992	7.93722	7.94253	7.92248	8.07242
sws	0.418399	0.0822222	18	0	0.0546553	5.57619	5.65492	5.58102	5.49585	5.44763	5.56595	5.50919	5.53607	5.56733	5.43458
CG8032	0.418399	0.0822222	24	9	0.0546424	4.28544	4.32982	4.24363	4.36778	4.33086	4.38474	4.29111	4.3385	4.21657	4.26122
pds5	0.418399	0.0822222	18	6	0.054583	3.59052	3.55261	3.50863	3.69201	3.59528	3.53483	3.48274	3.49479	3.61558	3.51493
abba	0.418399	0.0822222	24	18	0.0543892	7.0434	7.08434	7.04062	7.00929	7.03098	7.13282	7.0199	7.06696	7.1505	7.24066
RpS16	0.418399	0.0822222	24	21	0.0542132	9.6218	9.64678	9.72693	9.59171	9.53424	9.6049	9.69575	9.6365	9.67524	9.83922
SCAR	0.418399	0.0822222	18	9	0.0541499	4.73018	4.73184	4.79683	4.86165	4.87887	4.81337	4.81852	4.77106	4.84159	4.81169
ptr	0.418399	0.0822222	18	3	0.0537182	4.42543	4.47023	4.53809	4.40785	4.49042	4.397	4.40606	4.33711	4.42682	4.56884
Pi3K92E	0.418399	0.0822222	18	6	0.0536643	4.53407	4.42351	4.50944	4.60877	4.56286	4.4898	4.49353	4.44052	4.58705	4.52029
Unc-115a	0.418399	0.0822222	18	6	0.0536259	3.86631	3.9291	4.00831	3.92469	4.10027	3.86054	3.86424	3.81112	4.01051	3.95936
mof	0.418399	0.0822222	18	6	0.0535754	2.56029	2.48452	2.50701	2.63184	2.65251	2.50413	2.50601	2.4897	2.67367	2.59628
lambdaTry	0.418399	0.0822222	18	3	0.0535665	1.12494	1.7652	1.24893	1.12725	1.14586	1.16771	1.07861	1.07442	2.30631	2.12594
CG14483	0.418399	0.0822222	24	6	0.0534247	7.28554	7.19221	7.28851	7.23944	7.29235	7.1978	7.20999	7.23883	7.07332	7.18449
Spn43Ab	0.418399	0.0822222	24	6	0.0531794	7.78669	7.68081	7.80191	7.84781	7.96078	7.72204	7.77294	7.78631	7.52445	7.73116
Dp	0.418399	0.0822222	18	9	0.0531741	4.84014	4.88494	4.89278	4.99478	4.98348	4.93333	4.94424	4.92481	4.93934	4.96533
CG5895	0.418399	0.0822222	24	9	0.0531469	4.4983	4.62458	4.49876	4.60596	4.57966	4.54762	4.54329	4.55265	4.36059	4.47535
CG5270	0.418399	0.0822222	18	6	0.0527841	3.42506	3.43484	3.48323	3.55563	3.6842	3.4019	3.4584	3.44602	3.59936	3.52436
CG4603	0.418399	0.0822222	24	15	0.0527488	4.96804	4.9333	4.87056	5.00251	5.03457	5.04264	5.06028	5.03429	5.00778	5.09917
ClC-c	0.418399	0.0822222	18	9	0.0526985	4.91916	5.01051	4.94443	5.09028	5.07373	5.01371	4.96572	5.0335	5.04071	5.01056
CG5027	0.418399	0.0822222	18	9	0.0525138	3.46274	3.38858	3.47054	3.53068	3.55966	3.41921	3.54159	3.5134	3.50324	3.47383
TrissinR	0.418399	0.0822222	24	3	0.0523407	1.95434	1.87835	1.91199	1.91316	1.86457	1.75866	1.80433	1.84172	1.83845	1.88846
Rlip	0.418399	0.0822222	24	6	0.0523004	4.28042	4.27042	4.27851	4.34389	4.36257	4.24585	4.19646	4.21916	4.24529	4.26424
Use1	0.418399	0.0822222	18	9	0.0521855	3.26037	3.26564	3.2066	3.41802	3.34553	3.32281	3.31583	3.27242	3.34679	3.28355
Mcr	0.418399	0.0822222	18	9	0.0521643	4.1873	4.22571	4.14613	4.39162	4.27676	4.21866	4.24611	4.26232	4.26431	4.24549
EfSec	0.418399	0.0822222	18	6	0.0518974	1.76379	1.76245	1.72327	1.83651	1.85028	1.70694	1.72289	1.72419	1.87918	1.92352
Thiolase	0.418399	0.0822222	24	21	0.0513197	7.48684	7.43796	7.43567	7.41427	7.27913	7.39301	7.46681	7.48328	7.53563	7.58687
Glycogenin	0.418399	0.0822222	18	6	0.0512191	7.57011	7.53771	7.47216	7.61032	7.48922	7.44029	7.29204	7.35255	7.56414	7.5825
Ssadh	0.418399	0.0822222	18	12	0.0505709	6.18572	6.16739	6.22093	6.15902	6.18407	6.25971	6.30029	6.22807	6.11258	6.12853
Drep-1	0.418399	0.0822222	18	6	0.0504563	3.30744	3.32097	3.25517	3.53887	3.42758	3.28606	3.31917	3.31813	3.35145	3.38093
CG33523	0.418399	0.0822222	24	6	0.0504393	5.30025	5.40267	5.38285	5.44275	5.48478	5.35512	5.33133	5.39042	5.25103	5.32831
CG15657	0.418399	0.0822222	24	9	0.0504323	1.08381	1.03208	1.02445	1.09914	1.21929	1.09482	1.15198	1.05775	1	1.07132
CG16935	0.418399	0.0822222	18	15	0.0503409	6.17628	6.14433	6.13468	6.06545	6.06614	6.12275	6.18035	6.19704	6.07367	6.13691
CG2493	0.418399	0.0822222	18	12	0.0502703	5.74069	5.78221	5.82251	5.74755	5.82221	5.79498	5.9337	5.89345	5.52681	5.66995
Pitslre	0.418399	0.0822222	24	3	0.0501692	5.58443	5.58768	5.62855	5.57431	5.61856	5.51348	5.41448	5.50039	5.60623	5.56503
Lis-1	0.418399	0.0822222	18	6	0.0500672	6.02572	5.98775	5.98029	6.09799	6.03903	5.94804	5.88391	5.96131	6.00426	5.95025
Atg2	0.418399	0.0822222	18	6	0.0499182	4.75663	4.77688	4.80113	4.8755	4.95554	4.78447	4.78554	4.73227	4.83046	4.79816
mRpL17	0.418399	0.0822222	24	18	0.0498694	4.91263	4.93856	4.93667	4.82848	4.89207	4.95709	4.94894	5.01548	4.919	5.05797
CG31122	0.418399	0.0822222	24	9	0.0496099	3.87225	3.83973	3.79875	3.92887	3.88637	3.92718	3.82572	3.86891	3.76687	3.80068
rogdi	0.418399	0.0822222	18	3	0.0487897	5.25857	5.31322	5.3197	5.26238	5.28171	5.19603	5.21006	5.227	5.26645	5.39783
CG1354	0.418399	0.0822222	18	3	0.0486274	5.21025	5.14444	5.30745	5.22052	5.16737	5.1116	5.18325	5.0997	5.40637	5.38199
CG14711	0.418399	0.0822222	24	15	0.0485422	3.43493	3.41651	3.40259	3.47536	3.47465	3.58043	3.47386	3.50358	3.48213	3.5324
CG8726	0.418399	0.0822222	18	6	0.0484559	4.44745	4.40539	4.31652	4.49285	4.45676	4.37361	4.38281	4.37397	4.45986	4.46649
Eip74EF	0.418399	0.0822222	24	15	0.0479298	2.31213	2.29697	2.24196	2.33948	2.27332	2.3759	2.37055	2.40446	2.3503	2.2928
CG32406	0.418399	0.0822222	24	3	0.047642	2.30503	2.32861	2.27495	2.26594	2.27067	2.20757	2.21424	2.26991	2.09603	2.2325
koi	0.418399	0.0822222	18	6	0.0475342	2.49616	2.53368	2.47016	2.62311	2.51671	2.42632	2.49479	2.42744	2.65917	2.58415
CG16972	0.418399	0.0822222	24	3	0.0473599	2.68103	2.67316	2.65935	2.68105	2.66097	2.6024	2.60618	2.53819	2.66039	2.60724
lin19	0.418399	0.0822222	18	6	0.0471175	5.02971	5.04825	5.06692	5.12368	5.111	4.9778	5.02989	5.00656	5.03181	5.03248
RpL23A	0.418399	0.0822222	24	21	0.0470968	9.7292	9.73682	9.82712	9.68629	9.67022	9.69622	9.74308	9.76288	9.77366	9.92072
CG6277	0.418399	0.0822222	24	18	0.0463183	1	1.0092	1	1	1	1.06537	1	1.0655	2.55267	1.39727
RpL36A	0.418399	0.0822222	18	3	0.0460578	9.95428	9.9838	10.078	10.0029	9.96594	9.84859	9.94461	9.92822	9.98677	10.1117
CG14024	0.418399	0.0822222	24	6	0.0457512	1.83483	1.76115	1.78948	1.78796	1.7932	1.73903	1.73666	1.65567	1.69593	1.73373
Mhcl	0.418399	0.0822222	18	15	0.0457229	4.3146	4.34528	4.37926	4.30757	4.33606	4.4825	4.45678	4.45453	4.33282	4.37192
Gclc	0.418399	0.0822222	18	3	0.0455877	5.76418	5.79553	5.91562	5.81376	5.83584	5.73098	5.78271	5.73844	6.02638	6.05883
CG4089	0.418399	0.0822222	24	6	0.0454182	2.68789	2.67207	2.62148	2.73418	2.68361	2.65086	2.55801	2.66995	2.55452	2.62882
CG7943	0.418399	0.0822222	24	15	0.0453722	4.33925	4.34139	4.34622	4.36633	4.30415	4.37105	4.41404	4.47319	4.40556	4.39354
Doa	0.418399	0.0822222	18	3	0.0452644	5.65116	5.59459	5.52303	5.56637	5.51228	5.46575	5.46933	5.53973	5.75307	5.57925
CG10672	0.418399	0.0822222	18	3	0.0452202	5.28869	5.3338	5.25626	5.32749	5.24843	5.2323	5.2284	5.1895	5.26671	5.39765
CG13897	0.418399	0.0822222	18	12	0.0451297	2.74392	2.62418	2.80892	2.75988	2.7691	2.89074	2.81572	2.80606	2.64179	2.68656
for	0.418399	0.0822222	24	0	0.0447705	5.49157	5.52047	5.54794	5.50393	5.46425	5.41954	5.45695	5.42825	5.53853	5.46253
Dp1	0.418399	0.0822222	24	15	0.0446517	6.45162	6.53838	6.4447	6.52844	6.47047	6.58864	6.56346	6.59158	6.54161	6.46001
eIF-4E	0.418399	0.0822222	18	6	0.0435686	6.17399	6.22648	6.26217	6.28062	6.3143	6.21869	6.19962	6.19712	6.27455	6.3428
CG1998	0.418399	0.0822222	24	18	0.0435542	4.61497	4.55363	4.59532	4.51705	4.54295	4.51958	4.60007	4.62088	4.65691	4.71594
Pex1	0.418399	0.0822222	24	3	0.0434489	2.94669	2.90023	2.94603	2.92493	2.92558	2.89063	2.88384	2.7917	2.84114	2.88459
Vps26	0.418399	0.0822222	18	9	0.043046	4.72571	4.81983	4.82523	4.88939	4.92454	4.86431	4.87358	4.82629	4.8503	4.92369
CR17025	0.418399	0.0822222	18	6	0.042944	1.35504	1.41809	1.35304	1.37557	1.47671	1.29241	1.25856	1.3406	1.40474	1.38987
hop	0.418399	0.0822222	18	6	0.0429102	3.61622	3.65265	3.6437	3.70989	3.74069	3.68001	3.60661	3.64339	3.67032	3.68822
HPS1	0.418399	0.0822222	18	12	0.0427425	3.04954	3.10734	3.02874	3.11583	3.11011	3.13889	3.09308	3.23972	3.00173	3.07472
CR33318	0.418399	0.0822222	24	6	0.0422461	1.12973	1.0563	1.05704	1.11626	1.18692	1.06775	1.04142	1.03434	1.03062	1.0425
ClC-a	0.418399	0.0822222	24	15	0.0419095	4.97672	5.08515	5.06251	5.082	5.0794	5.20244	5.13696	5.14442	5.0821	5.0798
CCHa2r	0.418399	0.0822222	24	0	0.0418805	1.40632	1.43828	1.41489	1.26592	1.40108	1.39054	1.34709	1.23029	1.37479	1.39406
CG2162	0.418399	0.0822222	18	6	0.0416638	5.36462	5.38712	5.30941	5.35867	5.43377	5.28687	5.2423	5.30568	5.32414	5.4262
gp210	0.418399	0.0822222	18	6	0.0415199	3.15138	3.15824	3.10674	3.38575	3.24564	3.13291	3.14212	3.1574	3.35917	3.18411
Tsp26A	0.418399	0.0822222	18	6	0.0409312	2.63751	2.60629	2.57554	2.6411	2.63392	2.58371	2.46438	2.51749	2.62508	2.59952
CG9418	0.418399	0.0822222	18	3	0.0407391	2.98586	2.92478	3.0426	2.9623	3.03935	2.93952	2.89686	2.94642	3.12178	3.15141
Unc-76	0.418399	0.0822222	18	6	0.0401191	4.90884	4.84998	4.81688	4.92133	4.87751	4.85439	4.77603	4.80921	4.91704	4.91703
UbcD2	0.418399	0.0822222	18	6	0.0398342	4.19864	4.16811	4.10872	4.20187	4.3366	4.12603	4.15125	4.14443	4.27078	4.28502
CG6621	0.418399	0.0822222	18	6	0.0396358	3.74178	3.78743	3.77587	3.8153	3.82896	3.74851	3.67643	3.73389	3.75796	3.82938
[truncated: 8,392 more rows]

## Sheet: JTK results for O3
Probeset - O3	BHQ	ADJP	PER	LAG	AMP	ZT0O3A	ZT0O3B	ZT0O3C	ZT6O3A	ZT6O3C	ZT12O3A	ZT12O3B	ZT12O3C	ZT18O3A	ZT18O3B	ZT18O3C
CG34180	0.0134564	0.000151515	24	3	1.39068	6.56994	6.68882	6.44412	5.18919	5.4988	3.6806	3.76826	3.58824	4.36703	4.79023	4.36858
tim	0.0134564	0.000151515	24	18	1.36843	5.70647	5.53384	5.61473	4.41948	4.11478	7.05101	7.08846	7.05288	7.55901	7.56809	7.55905
CG17127	0.0134564	0.000151515	24	3	1.08383	4.82173	4.7526	4.74269	4.11868	4.39446	2.97788	2.86017	2.51967	3.29049	3.72456	3.1534
CG18302	0.0134564	0.000151515	24	15	0.968574	2.83057	2.81383	2.76405	3.98847	3.87657	4.88472	4.77092	4.72381	4.46032	4.69449	4.54019
Pdh	0.0134564	0.000151515	24	3	0.960838	3.99087	4.13636	3.57621	2.55305	2.78354	1.77543	1.82527	1.73645	2.3153	2.19718	2.02738
sxe2	0.0134564	0.000151515	24	9	0.723391	6.31419	6.29572	5.89752	7.07337	6.92089	6.62363	6.58084	6.33379	4.29846	5.55882	4.37707
CG11529	0.0134564	0.000151515	24	15	0.722241	2.09522	2.25735	2.34109	2.57388	2.8993	3.98649	3.75989	3.64575	3.05083	3.24705	3.16763
CG16772	0.0134564	0.000151515	24	3	0.693738	9.62291	9.75169	9.50212	9.09424	9.18706	8.29044	8.22668	8.07646	8.53105	8.81983	8.63179
CG5853	0.0134564	0.000151515	24	18	0.651498	5.15082	5.09113	4.95289	4.26562	4.15811	5.2871	5.49595	5.246	5.88062	5.93812	6.00611
CG18493	0.0134564	0.000151515	24	0	0.623104	3.7403	4.00597	3.93394	2.83469	2.83731	2.2176	2.4291	2.42683	2.8378	2.95592	3.00868
cry	0.0134564	0.000151515	24	6	0.57518	6.67248	6.65907	6.61609	6.8802	6.82655	6.3944	6.42994	6.36019	5.12664	5.29838	5.21846
CG14880	0.0134564	0.000151515	24	12	0.56414	3.99196	4.09794	3.90909	4.40926	4.44088	5.25536	5.25972	5.1934	4.26308	4.37122	4.18112
Ugt86De	0.0134564	0.000151515	24	3	0.555986	3.10284	3.27741	3.16648	2.58678	2.53784	1.83842	1.85987	1.96081	2.31346	2.25882	2.50038
CG14259	0.0134564	0.000151515	24	12	0.547834	5.56339	5.68027	5.54401	6.35795	6.42943	6.73734	6.54762	6.44708	5.77401	6.0627	5.72197
CG7203	0.0134564	0.000151515	24	6	0.537382	5.91504	6.11276	6.02931	6.14959	6.24011	5.4789	5.44585	5.58266	5.38652	5.13264	4.56734
CG13618	0.0134564	0.000151515	24	15	0.522733	3.43425	3.12192	3.26509	3.90861	3.96669	4.49337	4.53185	4.42356	4.21692	4.08059	4.14256
CG15449	0.0134564	0.000151515	24	9	0.520879	2.44759	2.15865	2.16528	2.98512	3.28349	2.76764	2.68393	2.88089	1.81391	2.09928	2.03714
CG11951	0.0134564	0.000151515	24	6	0.512259	4.21244	4.40936	4.24496	4.58783	4.42644	4.19488	4.03658	4.06288	2.92574	3.2091	2.93286
snoRNA:Psi28S-2566	0.0134564	0.000151515	24	3	0.489479	3.65731	3.05986	2.92259	2.67772	2.62106	2.28158	1.90584	1.90148	2.60569	2.35841	2.39528
fabp	0.0134564	0.000151515	18	9	0.488142	3.46914	3.45267	3.5112	4.2447	4.52923	3.83709	3.82915	4.17554	3.58664	3.71004	3.53476
CG15096	0.0134564	0.000151515	18	3	0.482453	7.11186	6.95201	7.17933	6.54897	6.5258	6.25199	6.20866	6.31446	7.18043	7.21815	7.29451
Cpr67B	0.0134564	0.000151515	24	0	0.476431	7.70315	7.68422	7.62703	7.1019	7.27743	6.67327	6.76737	6.80468	7.41139	7.56602	7.53261
CG10912	0.0134564	0.000151515	24	9	0.466349	6.34337	6.37176	6.24881	7.19907	7.18816	6.4006	6.50774	6.59605	5.88786	5.55687	6.16923
Npc2b	0.0134564	0.000151515	24	12	0.461003	5.90434	5.88027	5.78019	6.5326	6.7107	6.84392	6.78868	6.71597	6.19234	6.48645	6.22641
Ugt86Da	0.0134564	0.000151515	24	6	0.452305	5.56281	5.65467	5.49864	5.90976	5.83423	5.27649	5.25861	5.15609	4.63415	4.94098	4.9067
CG14275	0.0134564	0.000151515	24	15	0.442262	4.80111	4.84039	4.79623	5.10139	5.21338	5.85155	5.61091	5.67281	5.40896	5.56111	5.4642
GstE5	0.0134564	0.000151515	24	9	0.441952	4.56911	4.63231	4.43691	5.11268	5.12496	4.85851	4.83172	4.86768	4.04844	4.42118	3.9815
Ahcy89E	0.0134564	0.000151515	24	12	0.436536	3.77964	3.90289	3.77044	4.27613	4.36911	4.725	4.64519	4.71394	4.01558	4.06073	4.02554
CG10211	0.0134564	0.000151515	24	18	0.421994	2.8628	2.75858	2.85518	2.74455	2.69032	3.05645	3.13555	3.1744	3.46411	3.86322	3.61863
Cht7	0.0134564	0.000151515	24	18	0.407399	2.24365	2.19894	2.20704	2.05238	1.93611	2.6135	2.52119	2.48632	2.90442	2.82481	2.91648
CG8112	0.0134564	0.000151515	18	12	0.40603	4.0588	4.05715	3.97788	4.20427	4.18248	4.59919	4.91136	4.74281	3.4841	3.63493	3.67222
Cda4	0.0134564	0.000151515	24	6	0.379502	1.98415	2.12698	2.20793	2.40561	2.26641	1.95695	1.71507	1.79467	1.58393	1.55996	1.50135
CG15673	0.0134564	0.000151515	24	12	0.373148	3.66384	3.64625	3.55068	3.99678	4.15082	4.34597	4.41578	4.19284	3.6742	3.70385	3.74375
CG3823	0.0134564	0.000151515	18	12	0.366337	3.57656	3.49207	3.57268	3.81295	3.96208	4.12305	4.1486	4.08388	3.34384	3.27807	3.44705
CG10253	0.0134564	0.000151515	24	21	0.348456	4.94525	5.02145	5.01296	4.54457	4.72918	4.73008	4.76311	4.73638	5.49842	5.40417	5.42201
hgo	0.0134564	0.000151515	24	9	0.336104	5.93908	6.04523	5.91143	6.38319	6.51428	6.38132	6.18897	6.15233	5.63497	5.86327	5.65786
CG15528	0.0134564	0.000151515	18	9	0.332085	4.73364	4.56257	4.61566	5.15199	5.31496	5.11835	5.12357	4.91785	4.83349	4.82653	4.90277
Cyp6t1	0.0134564	0.000151515	24	12	0.330785	3.82818	3.85861	3.7797	4.20432	4.3387	4.41324	4.43002	4.51003	3.96307	4.06468	3.96678
CG32647	0.0134564	0.000151515	24	21	0.33022	6.15854	6.02974	5.93367	5.56724	4.67814	5.78626	5.90104	5.66747	6.18899	6.23116	6.24316
CG14186	0.0134564	0.000151515	18	15	0.325466	3.32447	3.36339	3.27284	2.79954	2.7965	3.56538	3.53839	3.55098	3.20089	3.04163	3.08435
Ect3	0.0134564	0.000151515	24	15	0.324982	3.88466	3.77069	3.66257	3.98919	4.09299	4.4887	4.71112	4.33858	4.09963	4.23596	4.30767
PGRP-LB	0.0134564	0.000151515	24	12	0.324883	2.86788	3.00991	2.79266	3.2422	3.40547	3.65805	3.66929	3.52692	3.1214	3.2198	3.12472
Gclm	0.0134564	0.000151515	24	12	0.322067	5.77896	5.74531	5.80532	6.20281	6.26566	6.36037	6.45877	6.56169	5.97287	6.19637	6.07378
CG14329	0.0134564	0.000151515	24	6	0.317646	1.8356	2.01385	1.80727	2.07755	2.33192	1.57055	1.62322	1.70327	1.46541	1.30465	1.47535
bnb	0.0134564	0.000151515	24	15	0.315872	5.48421	5.49159	5.53385	5.68543	5.67099	6.13341	6.16104	6.2148	5.79227	5.86501	5.92966
smp-30	0.0134564	0.000151515	18	12	0.315094	7.05276	7.02259	7.17612	7.26781	7.20972	7.60806	7.712	7.54934	6.50606	6.25938	5.94212
Cyp28d1	0.0134564	0.000151515	24	12	0.31317	7.35364	7.38256	7.28837	7.67402	7.65357	7.97979	8.02259	8.08927	7.48191	7.49778	7.57488
DmsR-1	0.0134564	0.000151515	24	18	0.304355	2.91388	2.96439	3.16968	2.79915	2.4169	3.22728	3.2026	3.21562	3.53061	3.39998	3.56896
CG13639	0.0134564	0.000151515	24	18	0.291756	2.11736	2.43815	2.17467	1.76134	1.70815	2.44037	2.45179	2.51632	2.52881	2.57826	2.69992
CG1791	0.0134564	0.000151515	24	6	0.29174	4.63092	4.762	4.62988	4.88587	5.07607	4.61161	4.42861	4.44681	4.05618	4.36765	4.25101
CG8630	0.0134564	0.000151515	18	12	0.289352	3.71471	3.78857	3.68385	3.95667	3.94617	4.36819	4.15749	4.18558	3.56276	3.66807	3.53233
drd	0.0134564	0.000151515	18	12	0.289197	2.959	2.96333	2.99635	3.3068	3.17433	3.44068	3.40355	3.40701	2.80711	2.91129	2.80345
Hr38	0.0134564	0.000151515	24	18	0.287732	2.21445	2.23091	2.18857	1.88517	1.83351	2.28297	2.42447	2.25787	2.44643	2.71328	2.6296
PGRP-LA	0.0134564	0.000151515	18	9	0.284131	3.56391	3.65029	3.59942	4.05515	4.03617	4.02327	3.92688	4.01608	3.76915	3.80138	3.80635
CG4991	0.0134564	0.000151515	24	15	0.280713	3.77368	3.7036	3.80477	4.02029	3.92735	4.31779	4.30261	4.42713	4.03832	4.21525	4.13725
CG15418	0.0134564	0.000151515	24	6	0.279652	3.202	3.16702	3.12529	3.38024	3.83654	3.04493	3.04303	3.07059	2.66724	2.515	2.95946
CG5527	0.0134564	0.000151515	24	21	0.275958	3.30378	3.23054	3.12965	2.9037	2.86754	3.06007	3.08918	2.97058	3.51577	3.46962	3.46783
tok	0.0134564	0.000151515	24	21	0.267582	4.65997	4.65323	4.67577	4.32586	4.21648	4.4954	4.60349	4.56784	4.86601	5.01651	4.99057
GstE1	0.0134564	0.000151515	24	9	0.264311	5.96871	5.96558	5.97548	6.2391	6.28668	6.18625	6.21951	6.07441	5.57331	5.78234	5.69576
lectin-24Db	0.0134564	0.000151515	24	6	0.261476	4.88453	4.85187	4.87525	4.90397	4.98275	4.81762	4.56279	4.79529	4.36553	4.41131	4.26526
CG15828	0.0134564	0.000151515	18	0	0.260369	5.37695	5.34328	5.31869	4.89993	4.50377	4.9977	5.03291	5.01976	5.31191	5.31232	5.20807
CG7267	0.0134564	0.000151515	24	6	0.25916	7.24554	7.32638	7.30285	7.36999	7.58921	7.05359	7.08359	7.05858	6.60735	6.96991	6.85709
DnaJ-1	0.0134564	0.000151515	24	15	0.253312	5.93858	6.0478	5.95752	6.23639	6.16281	6.62799	6.71543	6.50583	6.26346	6.26514	6.26938
CG12001	0.0134564	0.000151515	24	21	0.24298	4.7815	4.70901	4.75931	4.39955	4.30153	4.66093	4.69215	4.54326	4.8902	5.07025	4.9014
Ugt58Fa	0.0134564	0.000151515	18	9	0.23926	2.25302	2.25188	2.29535	2.65094	2.85026	2.57866	2.47257	2.46958	2.38443	2.30809	2.37808
Mlp60A	0.0134564	0.000151515	18	9	0.228639	7.66532	7.65609	7.61402	8.02312	8.14604	7.89062	7.99003	7.88281	7.85039	7.87673	7.7406
verm	0.0134564	0.000151515	18	3	0.219629	3.83937	3.96287	3.93911	3.66213	3.623	3.51999	3.32344	3.53882	4.12408	4.15249	4.04305
CG17574	0.0134564	0.000151515	24	9	0.215459	5.03559	5.11591	5.13531	5.48084	5.65958	5.16966	5.14653	5.35312	4.96079	4.96304	4.95665
Dot	0.0134564	0.000151515	18	3	0.213458	3.68827	3.6847	3.62179	3.3414	3.44427	3.32722	3.31104	3.3197	3.7288	3.84419	3.91216
Clect27	0.0134564	0.000151515	24	18	0.212138	6.54511	6.57723	6.5194	6.32517	6.48993	6.72708	6.62914	6.61421	6.93215	7.05961	6.92949
CG17124	0.0134564	0.000151515	18	3	0.207745	6.42917	6.43018	6.40687	6.21011	6.33085	6.06134	5.94566	6.13614	6.6949	6.67971	6.7945
CG16965	0.0134564	0.000151515	18	12	0.206764	3.80219	4.02944	3.80443	4.27345	4.18283	4.3245	4.30891	4.29404	3.7856	3.73227	3.75671
CG9119	0.0134564	0.000151515	18	12	0.20446	6.63804	6.42697	6.69477	6.70779	6.70919	6.91941	6.91455	7.08475	5.80646	6.25606	5.57714
CG31105	0.0134564	0.000151515	24	18	0.204099	1.45789	1.35986	1.44319	1.27218	1.29575	1.58758	1.56414	1.55762	1.61746	1.75329	1.89711
CG10132	0.0134564	0.000151515	18	0	0.203922	3.97211	4.03232	4.00922	3.63429	3.59583	3.80751	3.81759	3.71491	3.87819	3.88002	3.90258
tilB	0.0134564	0.000151515	18	9	0.201946	1.69214	1.62098	1.64731	1.96797	2.03897	1.87576	1.96709	1.94259	1.84054	1.76224	1.83563
CG43394	0.0134564	0.000151515	24	18	0.199611	4.03638	4.10628	4.05682	3.89332	3.88755	4.1904	4.1639	4.17952	4.37889	4.38667	4.34976
CG3775	0.0134564	0.000151515	24	18	0.19756	5.00618	4.97781	5.05604	4.80689	4.88961	5.10845	5.1622	5.14698	5.22446	5.34783	5.40731
ERp60	0.0134564	0.000151515	18	9	0.195112	7.06189	7.08832	7.04675	7.4131	7.47286	7.28621	7.25611	7.35104	7.10167	7.17724	7.18963
Sod3	0.0134564	0.000151515	24	9	0.194639	4.59883	4.60881	4.63609	4.82139	5.042	4.80193	4.76347	4.79227	4.333	4.53489	4.40998
CG12512	0.0134564	0.000151515	24	6	0.192931	5.01359	5.01884	4.9578	5.09786	5.28188	4.89844	4.90046	4.93264	4.54579	4.67257	4.7124
CG13285	0.0134564	0.000151515	24	6	0.189679	3.83999	3.77603	3.81072	4.11168	4.35785	3.73802	3.6618	3.61192	3.47495	3.57811	3.58598
CG6776	0.0134564	0.000151515	24	9	0.189495	6.81377	6.81638	6.78916	7.09049	7.18198	7.02179	6.93195	6.94606	6.5955	6.7831	6.70205
Acsl	0.0134564	0.000151515	18	0	0.18697	7.38204	7.38872	7.37532	7.08651	6.91852	7.21489	7.14534	7.24295	7.3214	7.33213	7.32212
CG4829	0.0134564	0.000151515	24	12	0.185694	4.01557	4.01042	3.94326	4.19991	4.18701	4.38274	4.35225	4.31928	4.06083	4.0165	4.10776
CG15080	0.0134564	0.000151515	24	18	0.18487	1.43414	1.42033	1.43178	1.41574	1.33367	1.65797	1.55794	1.60545	1.94762	1.74546	1.6875
CG9903	0.0134564	0.000151515	24	12	0.173675	2.87957	2.87221	2.86085	3.11844	3.02707	3.13543	3.16326	3.27534	2.92221	3.01252	2.89044
CG3534	0.0134564	0.000151515	24	6	0.172966	4.92235	4.8992	4.78902	5.08616	5.04769	4.72561	4.76068	4.76943	4.58681	4.67356	4.66593
Hop	0.0134564	0.000151515	24	12	0.172343	4.9621	4.95091	5.01277	5.25911	5.17545	5.3577	5.28901	5.30696	5.04014	5.11658	5.16404
Sp212	0.0134564	0.000151515	24	9	0.169002	4.02213	4.02143	3.90927	4.22007	4.25642	4.06242	4.09197	4.07376	3.59455	3.89235	3.79249
CG12214	0.0134564	0.000151515	24	6	0.166382	6.19527	6.16694	6.18772	6.24652	6.29285	6.10393	6.03819	6.06405	5.91214	5.89958	5.92187
CG11790	0.0134564	0.000151515	18	9	0.163809	5.07236	5.13892	4.97934	5.3401	5.4626	5.23755	5.27347	5.28184	5.232	5.23364	5.23563
CG9743	0.0134564	0.000151515	24	9	0.1601	5.0538	5.05072	5.05587	5.32277	5.36597	5.21558	5.17362	5.11341	4.94468	5.00679	4.93274
CG32191	0.0134564	0.000151515	24	0	0.157172	4.41208	4.34551	4.54132	4.15719	4.13885	3.85719	4.10295	4.13377	4.27967	4.25146	4.32961
CG4577	0.0134564	0.000151515	24	21	0.153819	5.74012	5.72268	5.74407	5.38009	5.2875	5.57884	5.64701	5.63686	5.85528	5.80167	5.80786
CG15203	0.0134564	0.000151515	18	9	0.152906	4.90542	4.94887	4.94642	5.16857	5.50351	5.1182	5.1338	5.07852	5.02141	5.02939	5.03185
CG4061	0.0134564	0.000151515	18	9	0.152837	2.58025	2.69803	2.57809	2.8741	2.91155	2.83797	2.82576	2.84847	2.80535	2.77454	2.75595
Mocs1	0.0134564	0.000151515	24	6	0.150589	4.26111	4.33312	4.28343	4.37326	4.40251	4.20934	4.24149	4.19231	3.89492	4.07272	3.92893
CG6356	0.0134564	0.000151515	24	15	0.14739	4.69585	4.75757	4.67085	4.81531	4.81038	5.17834	5.06772	5.02327	4.87848	4.87384	4.83899
CG31673	0.0134564	0.000151515	18	9	0.139642	4.97761	4.99919	4.99538	5.19644	5.34606	5.19309	5.11672	5.1649	5.07097	5.05424	5.08324
CG1443	0.0134564	0.000151515	18	12	0.133994	7.05068	7.06068	6.92996	7.18017	7.15462	7.25404	7.29459	7.23289	6.91667	6.87967	6.8932
CG12947	0.0134564	0.000151515	24	18	0.132055	1.6595	1.65164	1.62581	1.60188	1.61192	1.74042	1.76095	1.73417	1.9119	1.91038	1.8398
lace	0.0134564	0.000151515	18	3	0.129864	4.23939	4.25132	4.2389	4.16939	4.1529	4.05549	4.05028	4.03862	4.30996	4.26052	4.26777
Prat	0.0134564	0.000151515	18	6	0.125733	3.0051	2.93228	3.02452	3.21915	3.16564	2.87249	2.79782	2.92664	3.08554	3.05679	3.08071
Zfrp8	0.0134564	0.000151515	18	6	0.119144	3.36607	3.34926	3.34191	3.61162	3.61797	3.32894	3.26019	3.22018	3.45811	3.39659	3.45901
ine	0.0134564	0.000151515	18	12	0.11047	4.84665	4.90315	4.87263	5.01397	5.02424	5.08334	5.0504	5.06837	4.72517	4.781	4.80154
CG34126	0.0134564	0.000151515	24	21	0.109714	4.30067	4.30495	4.27557	4.18526	3.68902	4.18562	4.23843	4.1969	4.35493	4.39423	4.3883
CG42542	0.0134564	0.000151515	24	0	0.107038	5.17207	5.17365	5.18099	5.02431	5.04567	4.99516	4.88627	4.98874	5.14533	5.08168	5.14209
Kr-h2	0.0134564	0.000151515	24	6	0.104716	5.33709	5.42201	5.33201	5.47893	5.46523	5.30717	5.3301	5.31012	5.14355	5.27465	5.19963
CG4404	0.0134564	0.000151515	24	6	0.097831	5.64219	5.6283	5.58079	5.65018	5.77674	5.51311	5.53997	5.53671	5.43327	5.51054	5.46274
CG13126	0.0134564	0.000151515	18	6	0.0898885	3.54241	3.52926	3.44299	3.57576	3.59656	3.34197	3.41604	3.29119	3.55148	3.57445	3.56164
CG33051	0.0134564	0.000151515	18	6	0.0835128	3.03375	3.06278	3.04639	3.34676	3.32216	2.9516	3.00212	3.01614	3.22001	3.26914	3.22268
Map205	0.0134564	0.000151515	24	21	0.0762572	5.23013	5.19438	5.21142	5.10337	4.58973	5.17895	5.15257	5.10379	5.23456	5.23069	5.35238
dbo	0.0134564	0.000151515	24	21	0.0756512	4.09622	4.09973	4.04022	3.98595	3.88604	4.00309	4.03852	4.01565	4.14504	4.10456	4.13821
CG14511	0.0134564	0.000151515	18	6	0.057154	2.98586	2.99881	2.97312	3.23971	3.18998	2.92676	2.94528	2.96467	3.0261	3.13127	3.00253
Vha55	0.0134564	0.000151515	18	0	0.036357	8.27017	8.27104	8.25908	8.20379	8.15443	8.21919	8.22379	8.223	8.23487	8.25223	8.2303
CG31475	0.0134564	0.000151515	18	12	0.0316938	2.2853	2.26865	2.29347	2.31821	2.31784	2.41727	2.33397	2.33024	2.20557	2.25511	2.22497
CG3739	0.0248916	0.000606061	24	21	1.13576	7.24131	7.19096	6.93165	5.97536	6.15668	6.64	7.15248	6.84651	8.84499	9.10868	9.07745
CG17189	0.0248916	0.000606061	18	9	0.670882	4.368	4.6604	4.34804	5.45143	5.79106	5.4301	5.19054	5.4094	4.42125	4.74662	4.67492
CG5945	0.0248916	0.000606061	24	6	0.651683	9.45723	9.57192	9.17574	9.59812	9.73386	9.08451	8.88645	8.6582	7.79702	8.80435	7.84953
CG34454	0.0248916	0.000606061	24	12	0.578554	4.43978	4.43352	4.52543	5.25578	5.45851	5.54667	5.48544	5.42186	4.69674	4.98228	4.7436
CG6870	0.0248916	0.000606061	24	0	0.578301	4.79772	4.68905	4.85927	3.6507	3.96388	3.34915	3.45872	3.53996	4.09518	3.8655	4.19411
CG15784	0.0248916	0.000606061	18	9	0.576487	5.26444	5.28394	5.33871	6.28762	6.28851	5.811	5.9873	6.09943	5.77478	5.77423	5.86907
CG9815	0.0248916	0.000606061	24	15	0.559723	1.5449	1.46724	1.48056	1.77867	1.92028	2.83694	2.71455	2.8163	2.14688	2.24657	1.913
Cyp18a1	0.0248916	0.000606061	24	18	0.53671	3.30616	3.31709	3.30404	3.06683	3.15054	3.90944	3.98279	3.92045	4.11964	4.06352	3.96548
CG16898	0.0248916	0.000606061	24	18	0.527045	5.23609	4.94436	5.19759	5.11716	4.93675	5.3991	5.48449	5.32344	6.16634	6.24821	6.2726
Cyp6a21	0.0248916	0.000606061	24	3	0.518727	4.99616	5.07739	4.8411	4.69759	4.77145	3.97209	3.79553	3.83651	4.26356	4.69985	4.39474
CG7402	0.0248916	0.000606061	24	9	0.508185	3.20248	3.31816	3.06022	4.0265	4.02793	3.6654	3.53421	3.31008	2.59104	2.91588	2.7911
IM1	0.0248916	0.000606061	18	9	0.495406	6.11976	6.1096	5.94476	6.81831	7.29171	6.66652	6.72019	6.47314	6.28994	6.57694	6.46212
yellow-c	0.0248916	0.000606061	24	12	0.458817	5.99425	6.10911	5.879	6.62246	6.74337	6.95451	6.89348	6.72118	6.15305	6.55931	6.20216
CG5326	0.0248916	0.000606061	18	12	0.450017	3.65445	3.93199	3.68919	3.92854	4.18724	4.68802	4.57931	4.28724	3.47751	3.56118	3.26745
CG3999	0.0248916	0.000606061	18	12	0.439596	3.00456	2.97994	3.07564	3.39733	3.35684	3.6894	3.69982	3.787	2.73772	2.94555	2.98367
Cyp305a1	0.0248916	0.000606061	24	6	0.403402	5.71683	5.69946	5.65431	5.95303	6.08505	5.65847	5.51351	5.60075	4.9603	5.03608	4.90804
CG5618	0.0248916	0.000606061	24	0	0.393724	6.54418	6.6546	6.48805	5.79683	6.01732	5.81253	5.73972	5.78081	6.28494	6.10175	6.31695
CG8306	0.0248916	0.000606061	24	15	0.379834	5.97613	6.01426	5.93725	6.4606	6.44009	6.83036	6.78507	6.71075	6.53849	6.7645	6.55493
CG14105	0.0248916	0.000606061	24	9	0.374267	4.99669	5.13901	5.04192	5.4294	5.56777	5.48264	5.36782	5.30738	4.64708	4.87763	4.72254
CG6675	0.0248916	0.000606061	18	12	0.364752	3.27281	3.27463	3.13094	3.57756	3.5219	3.90732	3.77781	3.87153	3.06348	3.22264	3.12859
Mp20	0.0248916	0.000606061	18	9	0.362272	8.49165	8.44361	8.37025	8.99365	9.10698	8.99785	8.95301	8.69841	8.55724	8.69598	8.581
CG14529	0.0248916	0.000606061	24	0	0.335938	1.99208	1.8211	1.85217	1.34833	1.53131	1.23597	1.302	1.31925	1.79665	1.73334	1.52214
CG10131	0.0248916	0.000606061	24	9	0.322791	3.68624	3.75002	3.74617	4.16707	4.32908	4.13518	4.02972	4.13272	3.6061	3.72209	3.58527
CG31522	0.0248916	0.000606061	24	3	0.318406	7.04023	6.93442	7.0041	6.61793	6.52863	6.19875	6.28812	6.17504	6.49495	6.43469	6.53352
Indy	0.0248916	0.000606061	18	3	0.310791	6.55843	6.56736	6.57902	6.16452	6.04625	5.99952	5.94537	6.12337	6.58596	6.67541	6.75359
Cyp6a20	0.0248916	0.000606061	24	3	0.297395	6.02328	6.00221	5.80849	5.66031	5.74208	5.44725	5.31297	5.15458	5.46285	5.6844	5.44784
Gclc	0.0248916	0.000606061	24	21	0.292517	6.09261	6.09568	6.07203	5.75149	5.68412	5.73489	5.77305	5.87006	6.32971	6.26383	6.33777
CG17027	0.0248916	0.000606061	24	9	0.289255	3.72627	3.86622	3.8182	4.0517	4.14547	3.98505	3.87817	4.06424	3.3873	3.52527	3.40338
CG14823	0.0248916	0.000606061	24	0	0.281476	5.48988	5.38553	5.47283	5.00921	5.17745	4.83427	4.96918	4.90257	5.12403	5.35264	5.33125
CG7054	0.0248916	0.000606061	18	9	0.27543	5.90371	5.89257	5.91804	6.33086	6.30546	6.23047	6.30714	6.28626	6.06368	6.11771	6.11253
l(2)08717	0.0248916	0.000606061	24	15	0.275214	4.93113	4.97241	5.02582	5.08855	5.0285	5.70261	5.70397	5.73502	5.24515	5.07367	5.17324
regucalcin	0.0248916	0.000606061	24	9	0.269761	8.12621	8.20087	8.18107	8.42926	8.51702	8.36071	8.2197	8.5005	7.76244	8.07223	7.67602
CG10311	0.0248916	0.000606061	18	9	0.263329	6.46046	6.49413	6.30981	6.79708	6.98248	6.85951	6.74679	6.68923	6.59323	6.6021	6.66459
CG15117	0.0248916	0.000606061	24	12	0.263161	3.08127	3.1757	3.03806	3.45428	3.54582	3.56285	3.52899	3.81388	3.18864	3.27623	3.30581
Cyp4d2	0.0248916	0.000606061	18	9	0.260771	5.34695	5.37863	5.28356	5.68747	5.87833	5.64631	5.72365	5.68167	5.45681	5.59411	5.57631
crim	0.0248916	0.000606061	18	9	0.254142	4.29877	4.29265	4.2809	4.70241	4.66093	4.65585	4.48422	4.62269	4.43808	4.50202	4.4514
CG16700	0.0248916	0.000606061	24	12	0.245234	4.90538	5.07793	4.86836	5.28483	5.21956	5.66297	5.54603	5.33227	5.14124	5.1261	5.27903
Cyp12a4	0.0248916	0.000606061	18	9	0.245006	7.05661	7.04288	7.1139	7.43016	7.47243	7.43626	7.3836	7.41762	7.13692	7.29806	7.32599
whd	0.0248916	0.000606061	24	21	0.244745	7.21509	7.1764	7.13361	6.95197	6.87118	6.99209	7.04108	6.93807	7.40444	7.48142	7.43778
CG8839	0.0248916	0.000606061	18	9	0.242504	5.39238	5.46431	5.41113	5.8451	5.78067	5.74812	5.7852	5.74207	5.50792	5.71492	5.55166
NAAT1	0.0248916	0.000606061	24	6	0.241022	5.03795	5.106	5.03395	5.23726	5.24914	4.81889	4.86754	4.77972	4.69742	4.79688	4.69695
CG6361	0.0248916	0.000606061	24	15	0.234434	3.07614	3.05175	2.98989	3.33456	3.25973	3.47959	3.67712	3.52817	3.30646	3.4045	3.47078
GstD3	0.0248916	0.000606061	24	6	0.234022	4.0552	4.0269	3.95886	4.19057	4.40171	3.96395	3.85615	3.90735	3.77484	3.58714	3.60317
CG16820	0.0248916	0.000606061	24	9	0.231213	3.62555	3.67099	3.51587	4.25673	4.34395	3.79827	3.62856	3.8156	3.36409	3.4906	3.38774
GstD9	0.0248916	0.000606061	18	9	0.229476	5.63145	5.51423	5.55645	6.04408	6.09995	5.83354	5.84619	5.86508	5.71781	5.68743	5.56643
Sr-CI	0.0248916	0.000606061	24	6	0.227202	4.98088	4.94532	5.02456	5.23319	4.99378	4.90501	4.7196	4.77009	4.4578	4.69597	4.3797
Gk	0.0248916	0.000606061	24	18	0.22501	4.95492	4.94391	4.99037	4.77515	4.60116	5.02645	4.97221	4.99932	5.28259	5.29913	5.35582
CG8485	0.0248916	0.000606061	18	0	0.218198	4.83362	4.81571	4.79638	4.43446	4.29108	4.52531	4.5465	4.52962	4.72316	4.74849	4.79658
CG13510	0.0248916	0.000606061	18	6	0.216403	5.39886	5.31191	5.37262	5.85283	5.63022	5.05312	5.17783	5.22605	5.55047	5.48845	5.63742
CG14893	0.0248916	0.000606061	24	15	0.216017	1.01719	1.13834	1.15828	1.31371	1.24164	1.45983	2.51425	2.8666	1.39842	1.29535	1.3269
CG5999	0.0248916	0.000606061	18	12	0.215135	1.88706	1.91969	1.70401	1.98456	2.1046	2.18081	2.25599	2.2993	1.5811	1.84999	1.509
Zw	0.0248916	0.000606061	24	9	0.208665	5.01074	4.98169	5.11444	5.26295	5.28756	5.05223	5.19751	5.23148	4.70286	4.9009	4.7804
CG7777	0.0248916	0.000606061	24	9	0.205282	4.74023	4.81692	4.88693	5.03346	5.24091	4.91134	4.82402	4.89112	4.59445	4.5252	4.60372
CG32392	0.0248916	0.000606061	18	9	0.201099	1.83285	2.06084	1.9157	2.34587	2.28347	2.18163	2.23577	2.23324	2.03609	2.1459	2.10124
QC	0.0248916	0.000606061	18	9	0.192702	4.26542	4.33268	4.23356	4.56836	4.77816	4.51348	4.55257	4.47996	4.30509	4.43629	4.36245
Cyp6a22	0.0248916	0.000606061	24	3	0.187985	4.20221	4.22973	4.17432	4.1727	4.20206	3.85555	3.90604	3.88322	3.95306	4.06045	4.01584
CHES-1-like	0.0248916	0.000606061	24	21	0.187147	4.02179	3.96913	3.99055	3.82036	3.4163	3.85814	3.8464	3.80769	4.09243	4.16683	4.1951
fj	0.0248916	0.000606061	18	9	0.184835	2.12546	2.23405	2.16916	2.53196	2.46178	2.37798	2.50697	2.36241	2.23972	2.31478	2.28089
CG6836	0.0248916	0.000606061	24	6	0.18093	4.37858	4.55567	4.44003	4.46673	4.58674	4.29625	4.27937	4.24135	4.02881	4.21591	4.20508
modSP	0.0248916	0.000606061	24	0	0.177745	5.83517	5.87525	5.76546	5.6094	5.58008	5.44507	5.43284	5.46277	5.62097	5.81084	5.68049
alpha-Est7	0.0248916	0.000606061	24	9	0.172717	7.7605	7.67467	7.73363	7.90193	7.98625	7.84739	7.82799	7.97692	7.52658	7.64485	7.62116
CG1681	0.0248916	0.000606061	18	12	0.170379	7.40715	7.34782	7.44856	7.52288	7.51073	7.65064	7.75613	7.74126	7.20871	7.35795	7.13352
obst-A	0.0248916	0.000606061	18	12	0.169163	3.49335	3.58458	3.46686	3.75833	3.67737	3.87102	3.75727	3.86945	3.34661	3.32718	3.26981
Adgf-A	0.0248916	0.000606061	18	12	0.16845	2.87289	2.9469	2.76266	2.98332	2.94986	3.14447	3.07796	3.41635	2.77879	2.72933	2.67441
CG5001	0.0248916	0.000606061	18	9	0.167245	5.34824	5.37452	5.25455	5.6063	5.66702	5.52569	5.59699	5.43342	5.39963	5.39467	5.35401
PGRP-LC	0.0248916	0.000606061	24	15	0.166594	4.4114	4.39504	4.41885	4.59755	4.54917	4.82508	4.76561	4.78784	4.56726	4.64765	4.66155
CG30033	0.0248916	0.000606061	24	21	0.163399	1.16495	1.30727	1.30709	1.04838	1.0988	1.07789	1.12416	1.12269	1.33021	1.6667	1.42682
CG43102	0.0248916	0.000606061	24	21	0.162333	4.21811	4.1939	4.16991	3.96184	3.51019	4.10228	4.15621	3.91928	4.29614	4.28816	4.31633
Sptr	0.0248916	0.000606061	18	9	0.16111	3.47822	3.51251	3.53864	3.76494	3.84841	3.6626	3.74574	3.70761	3.52211	3.62964	3.57921
CG6310	0.0248916	0.000606061	24	9	0.160407	3.39522	3.48964	3.51376	3.75363	3.86036	3.65177	3.51384	3.59622	3.37901	3.43495	3.33455
CG10176	0.0248916	0.000606061	24	9	0.159791	3.64154	3.61371	3.57853	3.88163	3.91112	3.75351	3.62863	3.6674	3.47536	3.40539	3.56487
nito	0.0248916	0.000606061	24	18	0.158964	3.37242	3.39438	3.39285	3.3836	3.22679	3.53091	3.60745	3.49119	3.60847	3.67187	3.67508
Pdk1	0.0248916	0.000606061	18	0	0.155952	5.10394	5.04287	5.08014	4.8978	4.53919	4.92675	4.92132	4.79878	5.01802	4.94196	5.03154
Obp83ef	0.0248916	0.000606061	18	3	0.154875	3.29298	3.37626	3.19597	3.13705	3.21219	3.06218	3.0372	2.96043	3.68393	3.55202	3.81859
43710	0.0248916	0.000606061	18	9	0.153773	4.36271	4.38874	4.33473	4.63418	4.58862	4.60312	4.55528	4.56032	4.46912	4.45098	4.43306
TpnC73F	0.0248916	0.000606061	18	6	0.151866	4.27771	4.20345	4.27448	4.69308	4.70291	4.13941	4.15693	4.25958	4.35803	4.34078	4.51384
GstE7	0.0248916	0.000606061	18	12	0.151054	5.66235	5.45566	5.55787	5.63186	5.70552	5.7997	5.92842	5.77032	5.19053	5.35393	5.05316
Lrt	0.0248916	0.000606061	24	15	0.14988	3.02895	3.05398	2.96707	3.10935	3.12158	3.41437	3.40385	3.2685	3.21016	3.19627	3.11752
Ent2	0.0248916	0.000606061	24	18	0.144987	4.79413	4.70176	4.70387	4.63769	4.59935	4.74932	4.83069	4.79704	4.96169	5.05363	5.02892
gb	0.0248916	0.000606061	24	3	0.144304	2.64206	2.63829	2.64596	2.604	2.59696	2.41214	2.27493	2.38854	2.59543	2.41074	2.56688
Eip63F-2	0.0248916	0.000606061	24	3	0.144219	1.53029	1.46439	1.49693	1.38756	1.47503	1.25316	1.2259	1.23521	1.28566	1.32402	1.3039
CG3363	0.0248916	0.000606061	24	21	0.138084	2.86991	2.86011	2.85643	2.73164	2.55023	2.71379	2.79735	2.73451	2.9292	2.95138	3.00285
CG13624	0.0248916	0.000606061	24	21	0.137878	4.28895	4.14546	4.21813	4.05645	3.73713	4.14999	4.0984	4.11611	4.29507	4.30663	4.38716
Proct	0.0248916	0.000606061	24	21	0.134348	5.96184	5.8792	5.89292	5.69949	5.7405	5.85388	5.76826	5.76511	6.09779	5.90071	6.01974
crl	0.0248916	0.000606061	18	9	0.133862	5.75319	5.73373	5.74764	5.91601	6.0517	5.95755	5.88318	5.86092	5.77605	5.82729	5.85472
Irbp	0.0248916	0.000606061	18	6	0.133807	2.82737	2.79721	2.8624	3.00658	3.08236	2.72265	2.73774	2.68137	2.85778	2.88379	2.92791
CG34402	0.0248916	0.000606061	18	9	0.129821	3.58555	3.45542	3.49183	3.78149	3.95088	3.6275	3.66308	3.61543	3.57388	3.60296	3.59302
CG1516	0.0248916	0.000606061	24	0	0.129309	6.78327	6.74938	6.66143	6.6124	6.52612	6.3591	6.45272	6.48537	6.61679	6.66733	6.61398
Act87E	0.0248916	0.000606061	18	9	0.127638	8.38094	8.36379	8.27328	8.59046	8.76355	8.50727	8.46233	8.40361	8.38397	8.3955	8.44696
alpha-Est5	0.0248916	0.000606061	24	9	0.12584	3.52727	3.51303	3.56399	3.7444	3.6938	3.55703	3.58949	3.67581	3.41246	3.41461	3.37183
Akt1	0.0248916	0.000606061	24	21	0.124984	5.14517	5.1493	5.11495	4.97046	4.6553	5.07598	4.97699	5.02553	5.14664	5.20959	5.3179
CG3267	0.0248916	0.000606061	24	3	0.124866	4.08744	4.07057	4.1319	4.00845	3.95467	3.7793	3.75531	3.92813	3.94919	3.89356	3.94903
Act79B	0.0248916	0.000606061	24	6	0.124527	9.52379	9.52892	9.38662	9.55758	9.65015	9.36554	9.42377	9.38014	9.29425	9.35414	9.31808
cic	0.0248916	0.000606061	24	21	0.122513	4.11953	4.02867	4.06206	3.91343	3.29856	3.94619	3.99384	3.95046	4.14095	4.19442	4.11081
CG42272	0.0248916	0.000606061	24	21	0.121955	1.877	1.91206	1.84866	1.70382	1.74468	1.7916	1.76566	1.7501	1.90677	2.1463	2.02172
CG9413	0.0248916	0.000606061	18	0	0.11995	5.59219	5.56909	5.5045	5.35197	5.14114	5.46475	5.42181	5.35459	5.47107	5.50224	5.53208
fusl	0.0248916	0.000606061	24	18	0.11622	4.80724	4.80276	4.84123	4.80461	4.75608	4.86298	4.95876	4.93237	4.96949	5.02008	5.0282
CG6028	0.0248916	0.000606061	18	12	0.115816	6.36507	6.31487	6.34957	6.39741	6.51956	6.47313	6.55869	6.66109	6.21138	6.30731	6.1895
Lapsyn	0.0248916	0.000606061	24	21	0.115814	3.93029	3.84301	3.82839	3.79766	3.76456	3.77067	3.8209	3.80955	4.0621	3.98274	4.22895
mthl1	0.0248916	0.000606061	24	21	0.115807	3.07253	3.04304	3.1196	2.95907	2.65239	3.02622	2.99176	2.92339	3.14554	3.18662	3.19031
MESR3	0.0248916	0.000606061	24	18	0.113348	5.05059	5.03216	4.95646	4.9514	4.98545	5.11898	5.12214	5.09399	5.15943	5.33667	5.20044
Nox	0.0248916	0.000606061	24	9	0.10877	2.30247	2.38809	2.3227	2.45809	2.408	2.42746	2.40217	2.40208	2.2182	2.14719	2.17723
bl	0.0248916	0.000606061	18	9	0.10437	5.13451	5.17714	5.06452	5.35072	5.33643	5.20051	5.24361	5.25194	5.15311	5.19708	5.18211
Hr39	0.0248916	0.000606061	24	21	0.0991521	3.15242	3.11612	3.11336	3.03093	2.76809	3.05832	3.0082	3.08488	3.20168	3.17166	3.25113
Liprin-alpha	0.0248916	0.000606061	24	21	0.0988422	3.81698	3.82713	3.84078	3.72187	3.30435	3.72665	3.7806	3.698	3.89209	3.88488	3.88303
CG12499	0.0248916	0.000606061	18	3	0.0978929	2.35009	2.33429	2.31009	2.32572	2.23996	2.20197	2.16258	2.18117	2.47829	2.46497	2.43857
CG5346	0.0248916	0.000606061	24	6	0.0966357	5.08043	5.05443	5.07612	5.10845	5.09916	5.06463	5.03838	4.97926	4.86358	4.77471	4.90619
smg	0.0248916	0.000606061	24	21	0.096163	3.97395	3.92646	3.97074	3.83787	3.48381	3.95463	3.91553	3.89221	4.09055	4.02742	4.09441
tkv	0.0248916	0.000606061	24	21	0.0939451	4.94214	4.93026	4.90089	4.7993	4.52139	4.91967	4.87744	4.83228	5.00264	5.02884	5.01733
CG18766	0.0248916	0.000606061	18	9	0.0938663	4.40752	4.4494	4.37016	4.55832	4.62124	4.58249	4.49492	4.50257	4.46125	4.46184	4.44979
CG3925	0.0248916	0.000606061	18	9	0.0916865	4.41388	4.44227	4.38849	4.57398	4.63713	4.53985	4.49112	4.52228	4.41837	4.47452	4.46023
RhoGAP19D	0.0248916	0.000606061	24	21	0.0907133	3.38836	3.36246	3.37609	3.29797	2.74667	3.32427	3.37094	3.30619	3.48061	3.55963	3.46324
Smg6	0.0248916	0.000606061	24	6	0.0881366	5.42662	5.3951	5.37413	5.46033	5.57278	5.38656	5.33613	5.33219	5.21353	5.27198	5.28702
RpS15Ab	0.0248916	0.000606061	18	9	0.0874263	5.51367	5.51631	5.55253	5.71584	5.93179	5.60295	5.60931	5.58144	5.5666	5.59375	5.55263
CG6204	0.0248916	0.000606061	18	6	0.086622	3.48168	3.53084	3.53206	3.60613	3.65139	3.52387	3.4261	3.3731	3.535	3.54204	3.57717
Lar	0.0248916	0.000606061	24	21	0.0854919	3.75625	3.68111	3.7378	3.61509	3.01574	3.65982	3.64838	3.65055	3.86795	3.77199	3.74267
CG2691	0.0248916	0.000606061	24	21	0.0849331	3.62269	3.57741	3.65328	3.5261	3.47964	3.5373	3.53983	3.55741	3.75672	3.70342	3.64996
CG8417	0.0248916	0.000606061	24	6	0.0845014	5.84381	5.7817	5.85017	5.86971	6.00059	5.7596	5.77319	5.81424	5.66027	5.74721	5.65776
CG6145	0.0248916	0.000606061	18	3	0.0819834	5.25299	5.27149	5.40864	5.1598	5.1864	5.06997	5.17068	5.13753	5.45019	5.5473	5.47324
ab	0.0248916	0.000606061	24	21	0.0811729	2.4226	2.3637	2.40538	2.26739	2.12724	2.33227	2.30539	2.38511	2.45053	2.43285	2.44405
Lim3	0.0248916	0.000606061	18	3	0.0761786	2.85456	2.74466	2.82353	2.75644	2.69679	2.68902	2.64719	2.65743	3.03478	2.89006	2.87995
CG34384	0.0248916	0.000606061	24	21	0.075827	2.33383	2.32865	2.36502	2.23599	1.85458	2.28048	2.29919	2.25899	2.46456	2.38892	2.3649
tub	0.0248916	0.000606061	18	3	0.0745542	4.37056	4.3983	4.3647	4.3395	4.30555	4.31149	4.1792	4.20559	4.51538	4.5707	4.63172
CG34401	0.0248916	0.000606061	24	21	0.0744831	2.29934	2.25288	2.31379	2.21113	1.88367	2.20914	2.23538	2.22951	2.31715	2.36481	2.35193
CG2118	0.0248916	0.000606061	18	3	0.0733217	3.44559	3.43638	3.48009	3.34217	3.37093	3.34626	3.17903	3.32833	3.55661	3.60114	3.56208
CG11898	0.0248916	0.000606061	18	12	0.0706918	1.46049	1.48405	1.49311	1.48636	1.51314	1.58429	1.649	1.58393	1.33666	1.43649	1.28061
svr	0.0248916	0.000606061	24	18	0.0665527	4.65828	4.62857	4.6489	4.60126	4.3597	4.72703	4.69784	4.67472	4.73856	4.69926	4.7841
CG34057	0.0248916	0.000606061	24	15	0.0665274	1.13108	1.18877	1.21273	1.19821	1.23422	1.32999	1.32661	1.28669	1.28546	1.25786	1.26814
CG1103	0.0248916	0.000606061	24	21	0.0654434	3.03755	3.01957	3.04868	2.95013	2.98131	3.00528	2.97811	3.01802	3.07745	3.18135	3.20644
Ctf4	0.0248916	0.000606061	24	6	0.0615614	1.45913	1.4116	1.47118	1.48889	1.56104	1.40983	1.38904	1.37973	1.26311	1.37623	1.38171
hpo	0.0248916	0.000606061	24	21	0.0606751	3.88165	3.893	3.88456	3.82385	3.80977	3.82931	3.82755	3.82085	3.94014	3.91015	3.94549
chb	0.0248916	0.000606061	24	21	0.0549355	4.10779	4.09747	4.09259	4.03484	3.74548	4.07684	4.08749	4.00327	4.15995	4.1264	4.14524
CG34347	0.0248916	0.000606061	24	21	0.0523096	2.3296	2.30951	2.34556	2.25163	1.87408	2.3134	2.29718	2.29526	2.41522	2.35685	2.36948
Cyp6v1	0.0248916	0.000606061	24	15	0.0520194	3.67687	3.66909	3.54679	3.69155	3.6777	3.7714	3.85118	3.72507	3.70458	3.75498	3.71392
CG9305	0.0248916	0.000606061	18	6	0.039732	3.18508	3.16652	3.18048	3.30148	3.29475	3.15776	3.14125	3.15058	3.21881	3.27296	3.29883
vimar	0.0248916	0.000606061	24	21	0.0319319	3.03674	3.04985	3.04567	3.01352	2.86547	3.00698	3.01397	3.01939	3.09454	3.10607	3.05319
CG42329	0.0402896	0.0019697	24	3	1.03518	4.17773	3.69914	3.67609	3.50994	3.10669	2.05117	1.79453	2.39633	2.19653	2.57992	2.17026
CG14528	0.0402896	0.0019697	24	0	0.75149	6.53785	6.46005	6.19828	5.36001	5.3421	5.22457	5.25058	5.23921	6.19047	6.24419	6.41403
CG34208	0.0402896	0.0019697	18	9	0.721126	7.38813	7.30236	7.42858	8.25039	8.52443	8.45293	8.19666	8.44388	7.61941	8.08467	7.59123
Pdp1	0.0402896	0.0019697	24	18	0.677843	5.01851	4.82275	4.81514	4.92264	4.6147	5.75226	5.7128	5.65427	5.85844	5.93177	5.97487
CG10553	0.0402896	0.0019697	18	0	0.661868	6.66816	6.83917	6.72589	5.6282	5.78906	5.95097	5.80911	5.73294	5.93195	6.10862	6.08506
CG4576	0.0402896	0.0019697	24	15	0.557697	1.88165	2.23334	1.86076	2.04775	2.21926	3.05483	3.0139	3.14479	2.66513	2.49473	2.54225
CG9377	0.0402896	0.0019697	24	6	0.538805	5.5508	5.67922	5.50072	6.1576	5.99981	5.13455	5.54648	5.33218	4.34011	4.25739	5.22944
CG9400	0.0402896	0.0019697	18	9	0.48966	3.22685	3.34291	3.28885	3.96723	4.08051	4.04503	3.9777	3.77244	3.63781	3.59809	3.46066
CG34291	0.0402896	0.0019697	24	0	0.481997	4.90727	4.77279	4.92792	4.45491	4.13597	3.76968	3.55763	4.06992	4.2671	4.73033	4.38784
CG31100	0.0402896	0.0019697	24	18	0.47535	3.91981	3.8842	3.87632	3.88539	3.86832	4.44867	4.40392	4.29856	4.60438	4.65634	4.59324
CG8170	0.0402896	0.0019697	24	0	0.463525	2.06368	2.22156	2.11762	1.33492	1.39669	1.06253	1.08117	1.0425	1.42173	1.37123	1.39106
cln3	0.0402896	0.0019697	24	15	0.445926	4.68136	4.89201	4.77352	5.14064	5.19948	5.86669	5.93461	5.84812	5.2374	5.01383	5.2355
CG6048	0.0402896	0.0019697	24	6	0.427473	3.53841	3.60136	3.64988	3.79146	3.81798	3.47755	3.2474	3.62796	2.71826	2.45446	2.73272
CG33965	0.0402896	0.0019697	18	3	0.416663	2.94422	2.97754	2.85439	2.72686	2.9556	2.36351	2.20328	2.34183	3.20925	3.67037	3.13979
shf	0.0402896	0.0019697	24	12	0.41308	3.53369	3.59588	3.7281	4.28686	4.51343	4.29253	4.35964	4.57956	3.99423	3.93039	4.06049
CG31300	0.0402896	0.0019697	24	3	0.392875	6.23797	6.15013	6.21643	5.81197	6.01541	5.47236	5.47053	5.59407	5.55221	5.71096	5.48668
CG6834	0.0402896	0.0019697	24	6	0.389907	4.19031	4.32283	4.26652	4.44906	4.20669	4.0923	3.9056	4.18068	3.37973	3.41229	3.33419
CG17181	0.0402896	0.0019697	18	15	0.38848	4.94799	4.8697	4.70868	4.3033	4.31327	5.25255	5.3244	4.86512	4.35175	4.42318	4.33388
CG13422	0.0402896	0.0019697	18	9	0.387367	5.37545	5.33362	5.02144	5.90235	6.27922	5.63165	5.67717	5.66039	5.27994	5.39808	5.48757
CG10621	0.0402896	0.0019697	24	12	0.386155	5.1609	5.1653	5.22062	5.72003	5.62607	6.08464	6.29466	5.95474	5.49774	5.73217	5.54184
CG2781	0.0402896	0.0019697	24	12	0.385449	5.47899	5.60535	5.42741	5.9731	5.99438	6.53037	6.51126	6.20887	5.91892	6.05693	5.7815
CG6421	0.0402896	0.0019697	18	9	0.372531	6.09205	6.25951	6.09933	6.62435	6.84634	6.7754	6.59304	6.65578	6.31001	6.58738	6.43677
CG5011	0.0402896	0.0019697	18	6	0.372418	4.76418	4.65977	4.9247	5.3032	5.28675	4.25276	4.45157	4.68147	4.86051	4.95183	4.9397
CG11073	0.0402896	0.0019697	24	9	0.36877	6.19975	6.27244	6.21814	6.59844	6.7043	6.65761	6.69016	6.56808	5.94138	6.12131	5.90702
Cyp309a1	0.0402896	0.0019697	24	15	0.367803	4.85151	4.70467	4.61685	5.32084	5.32883	5.63233	5.69018	5.64869	5.22763	5.40545	5.42193
GstE6	0.0402896	0.0019697	24	9	0.367749	6.74706	6.70512	6.64573	6.99351	7.2472	7.14374	7.03586	6.95971	6.32071	6.5001	6.36031
CG1208	0.0402896	0.0019697	18	0	0.362493	5.84184	5.88507	5.63809	4.9943	4.98546	5.46939	5.34808	5.35354	5.54604	5.54891	5.35058
CG17839	0.0402896	0.0019697	24	12	0.361882	6.07615	6.06046	6.0201	6.63447	6.27785	6.75398	6.70871	6.632	6.22035	6.49052	6.1683
CG5948	0.0402896	0.0019697	24	9	0.361478	1.43019	1.73975	1.43599	2.13986	2.33263	1.92162	1.93284	1.93091	1.3839	1.70338	1.42067
b6	0.0402896	0.0019697	24	0	0.36082	2.14435	2.25454	2.08917	1.73371	1.72512	1.53042	1.44579	1.49182	1.91344	1.97009	2.23772
CG9837	0.0402896	0.0019697	18	15	0.359898	4.06632	4.2559	4.04958	3.50259	3.7192	4.5645	4.52573	4.261	3.67563	3.6573	3.72045
LysD	0.0402896	0.0019697	24	12	0.359787	9.70037	9.57715	9.65871	9.99624	10.4319	10.2217	10.2109	10.4612	9.926	9.86262	9.76611
CG5773	0.0402896	0.0019697	24	15	0.353349	5.56976	5.4143	5.64469	5.85162	6.06313	6.44072	6.42006	6.44212	6.02985	5.96878	6.06983
CG7322	0.0402896	0.0019697	24	9	0.342645	5.79845	5.69223	5.70824	6.24689	6.36688	6.03412	6.14874	6.20459	5.64851	5.79172	5.68611
CG34309	0.0402896	0.0019697	24	9	0.321332	1.42655	1.78433	1.52595	1.92651	2.01916	1.90278	1.86948	1.91403	1.15	1.62856	1.14313
CG17279	0.0402896	0.0019697	24	3	0.321323	2.0309	2.52018	2.21044	1.64893	1.59902	1.498	1.32578	1.3757	1.39596	1.56461	1.42556
Lsd-1	0.0402896	0.0019697	24	9	0.317579	7.06546	7.09555	7.15895	7.43037	7.4358	7.26364	7.36617	7.6024	6.79197	6.98094	6.71031
Ir25a	0.0402896	0.0019697	24	9	0.313058	1.67895	2.04982	1.69074	2.20732	2.18842	2.13824	2.12871	2.05605	1.66159	1.96084	1.55284
CG10433	0.0402896	0.0019697	24	0	0.312103	8.74143	8.7666	8.82065	8.25794	8.46137	7.9262	8.02027	8.06841	8.3717	8.34547	8.50567
CG2277	0.0402896	0.0019697	24	6	0.311302	4.33734	4.29594	4.32097	4.31145	4.35078	3.95629	3.91474	4.03819	3.84689	3.80996	3.8517
Inos	0.0402896	0.0019697	24	9	0.310539	7.51727	7.4682	7.44625	7.84056	7.95314	7.88174	7.8003	7.84706	7.23973	7.40952	7.31211
CG10559	0.0402896	0.0019697	24	9	0.308259	4.1657	4.19576	4.09689	4.52658	4.62945	4.35531	4.14473	4.25168	3.78274	3.70872	3.67823
CDase	0.0402896	0.0019697	18	9	0.307995	4.03274	4.0896	4.1228	4.60116	4.53183	4.56648	4.35228	4.50043	4.19676	4.4156	4.14103
Nep5	0.0402896	0.0019697	18	0	0.301849	2.4525	2.60226	2.42102	1.94355	1.95628	2.13437	2.032	2.20918	2.22484	2.18595	2.1716
CG4562	0.0402896	0.0019697	18	3	0.298594	3.70604	3.71736	3.56151	3.46862	3.10396	3.09201	3.1222	3.20192	4.1932	4.27986	4.24865
CG11029	0.0402896	0.0019697	24	9	0.296401	3.43208	3.37263	3.48868	3.75384	3.74398	3.67974	3.62261	3.77582	3.16547	3.07267	3.21136
ea	0.0402896	0.0019697	24	12	0.293515	3.55828	3.49821	3.49717	3.97601	4.08951	4.17368	4.14665	4.11158	3.78673	4.09908	3.8852
CG8708	0.0402896	0.0019697	24	0	0.292061	5.12944	5.05318	5.08465	4.62826	4.54242	4.51711	4.46627	4.84945	4.92528	4.94667	4.91246
CG8539	0.0402896	0.0019697	18	12	0.289828	4.11564	4.2276	4.22491	4.52456	4.43373	4.68858	4.63633	4.63863	3.98021	4.216	4.2116
CG33178	0.0402896	0.0019697	24	9	0.289759	5.94522	6.17182	5.92277	6.4045	6.60447	6.35444	6.30791	6.23839	5.87008	6.1256	5.87792
Mal-A6	0.0402896	0.0019697	24	12	0.283785	8.7648	8.44904	8.6677	9.05301	9.11758	9.01337	9.26532	9.287	8.82208	8.79524	8.76589
mdy	0.0402896	0.0019697	24	0	0.282585	4.74276	4.69592	4.80961	4.59645	4.41514	4.17744	3.96191	4.17715	4.41896	4.60214	4.58954
CG11796	0.0402896	0.0019697	24	6	0.280708	7.77922	7.82327	7.60359	7.68266	7.88394	7.57347	7.46906	7.38886	7.01046	7.37561	7.25711
CG10178	0.0402896	0.0019697	24	12	0.280139	4.44024	4.38284	4.45168	4.8524	4.81719	5.09648	4.8113	5.03448	4.57696	4.71895	4.60603
CG12224	0.0402896	0.0019697	18	9	0.278838	3.54887	3.43609	3.54935	3.9011	4.04774	3.69668	3.8633	3.95289	3.66116	3.78715	3.61563
CG34056	0.0402896	0.0019697	18	9	0.27817	3.41726	3.38162	3.42559	3.78385	3.85988	3.82	3.80854	3.76375	3.53717	3.60048	3.61452
CG7778	0.0402896	0.0019697	24	12	0.267027	6.24066	6.27854	6.08928	6.50839	6.56079	6.68992	6.87439	6.62485	6.18482	6.49509	6.35237
CG3940	0.0402896	0.0019697	18	9	0.265877	6.2464	6.15815	6.22764	6.5933	6.66271	6.60479	6.433	6.62126	6.28325	6.25749	6.2949
Ance-3	0.0402896	0.0019697	24	9	0.26497	3.51114	3.55326	3.63615	3.87075	3.77271	4.02428	3.69627	3.73567	3.21718	3.34722	3.34551
CG31104	0.0402896	0.0019697	24	21	0.263218	6.86271	6.78058	6.91381	6.32464	6.5553	6.49081	6.56644	6.65838	7.00153	6.9032	7.06696
mfas	0.0402896	0.0019697	24	12	0.259755	6.57632	6.63251	6.49771	6.86656	6.90073	7.04941	7.0171	6.99836	6.58053	6.74299	6.61903
CG30431	0.0402896	0.0019697	24	15	0.258053	4.35138	4.35955	4.19276	4.52255	4.57057	4.78229	4.94857	4.93299	4.49576	4.6979	4.72701
CG42241	0.0402896	0.0019697	18	0	0.255494	3.66654	3.72584	3.67913	3.4718	2.71814	3.38937	3.474	3.27425	3.5937	3.51205	3.50412
Nplp2	0.0402896	0.0019697	24	9	0.254643	12.2062	12.1831	12.1943	12.3051	12.6104	12.4162	12.2393	12.4288	11.8371	11.882	12.0532
CG17843	0.0402896	0.0019697	18	9	0.254078	3.6764	3.67375	3.65074	4.01581	4.17298	4.11289	3.96929	3.7782	3.80037	3.68956	3.77149
ced-6	0.0402896	0.0019697	24	15	0.24869	6.4467	6.50083	6.41616	6.56557	6.44418	6.97669	6.98972	6.87946	6.65794	6.72187	6.70845
in	0.0402896	0.0019697	18	12	0.246871	1.93979	1.93349	1.87085	2.15177	2.17158	2.38512	2.28577	2.31375	1.86719	1.91489	1.8865
CG8066	0.0402896	0.0019697	18	9	0.245157	4.48618	4.56831	4.43711	4.95205	5.07077	4.83516	4.72732	4.78018	4.5943	4.7451	4.74256
CG42246	0.0402896	0.0019697	18	9	0.242254	4.79115	4.93397	4.97776	5.26688	5.48556	5.28626	5.1458	5.25897	4.94465	5.11346	5.07909
CG13082	0.0402896	0.0019697	18	12	0.241417	2.94585	3.20683	2.87014	3.19876	3.19738	3.45269	3.55564	3.37239	2.43054	2.78627	2.53006
Ndae1	0.0402896	0.0019697	24	21	0.238435	4.0866	4.08738	4.09701	3.99438	3.77859	4.02442	4.03428	4.08998	4.43421	4.50198	4.46838
Acer	0.0402896	0.0019697	18	9	0.238239	6.09239	6.13335	6.15216	6.47227	6.5274	6.34543	6.39634	6.51938	6.1395	6.21702	6.19993
CG4250	0.0402896	0.0019697	24	6	0.237912	7.72048	7.91039	7.84126	7.92428	8.06879	7.72918	7.58493	7.83967	7.50769	7.48457	7.3583
Cyp4d8	0.0402896	0.0019697	24	12	0.236058	3.94562	4.00747	4.08624	4.30351	4.26781	4.54969	4.40372	4.51476	3.99701	4.24515	4.16005
CG3394	0.0402896	0.0019697	24	15	0.234843	3.20562	3.18906	3.10959	3.50527	3.22803	3.64746	3.7831	3.63606	3.51199	3.46742	3.41679
CG6999	0.0402896	0.0019697	18	9	0.234449	2.62681	2.66211	2.66951	3.00945	3.1272	2.92652	2.99069	2.74905	2.71483	2.85982	2.89369
Tsp	0.0402896	0.0019697	24	12	0.234033	4.19469	4.20794	4.25006	4.60373	4.59996	4.72212	4.6709	4.57882	4.41082	4.38687	4.37983
CG2444	0.0402896	0.0019697	24	9	0.23369	2.85397	3.12957	2.90485	3.59723	3.30624	3.21511	3.13467	2.96957	2.89488	2.84273	2.62111
desat1	0.0402896	0.0019697	18	15	0.231285	10.3706	10.2896	10.2809	9.89813	9.95576	10.4065	10.5738	10.4116	10.1287	10.2422	10.3629
CG9507	0.0402896	0.0019697	24	15	0.227942	2.75699	2.79011	2.90172	2.9781	2.9692	3.27232	3.28942	3.1912	3.21745	3.18821	3.24393
Yp3	0.0402896	0.0019697	24	15	0.226055	3.3254	3.20865	3.25397	3.42065	3.52461	3.58097	3.74612	3.72972	3.52958	3.68402	3.69204
CG30354	0.0402896	0.0019697	24	21	0.221458	1.76565	1.99787	1.81348	1.56759	1.40126	1.6458	1.70501	1.80018	1.86721	2.11612	2.11061
CG31469	0.0402896	0.0019697	18	9	0.219244	4.39128	4.37008	4.25767	4.826	4.74184	4.49484	4.62366	4.58554	4.41541	4.6091	4.43684
CG15279	0.0402896	0.0019697	24	12	0.216283	3.26246	3.27727	3.21602	3.5847	3.58749	3.59206	3.59243	3.56874	3.28929	3.33695	3.33697
pck	0.0402896	0.0019697	18	9	0.215673	4.37802	4.4061	4.42583	4.7302	4.79655	4.73618	4.67738	4.61329	4.4849	4.63796	4.57318
Ance-5	0.0402896	0.0019697	24	0	0.212354	6.1651	6.06914	5.91388	5.62852	5.59023	5.59914	5.54186	5.61135	5.68511	5.8773	5.74429
betaTub56D	0.0402896	0.0019697	18	9	0.212252	7.87978	7.80121	7.88357	8.17926	8.33542	8.10207	8.16989	8.11475	8.10476	8.10742	8.08171
fry	0.0402896	0.0019697	24	21	0.211533	4.57661	4.64556	4.52944	4.41708	3.98679	4.41561	4.51136	4.35981	4.8343	4.85285	4.70195
CG3609	0.0402896	0.0019697	18	12	0.208434	7.52063	7.29518	7.4146	7.44805	7.60048	7.66391	7.82938	7.81653	6.93899	7.29532	6.95497
CG34398	0.0402896	0.0019697	24	15	0.207422	5.30545	5.14207	5.10318	5.35606	5.12464	5.55475	5.64684	5.52267	5.44089	5.41413	5.39908
CG15293	0.0402896	0.0019697	24	18	0.206493	8.35151	8.28382	8.20427	8.22307	8.27483	8.42367	8.44017	8.41723	8.64368	8.71495	8.83564
Cpr50Cb	0.0402896	0.0019697	24	9	0.203079	1.22786	1.18544	1.17506	1.54899	1.61588	1.37997	1.47994	1.23095	1.05263	1.20701	1.11046
kuk	0.0402896	0.0019697	18	9	0.200675	4.31331	4.36765	4.31947	4.73511	4.66147	4.65107	4.5734	4.54667	4.31509	4.42148	4.41358
CG4733	0.0402896	0.0019697	18	0	0.196862	5.77848	5.8288	5.76864	5.35495	5.37409	5.63183	5.63468	5.52523	5.65747	5.55283	5.7005
CG1246	0.0402896	0.0019697	24	3	0.195232	3.86534	3.87306	3.99627	3.7652	3.83292	3.25311	3.28465	3.46264	3.70776	3.81647	3.77934
cp309	0.0402896	0.0019697	18	0	0.195049	6.05887	6.21799	6.01865	5.85162	5.55137	5.88137	5.88764	5.76501	5.97923	5.92882	6.01883
CG17324	0.0402896	0.0019697	24	3	0.193919	3.4337	3.65506	3.38501	3.25787	3.38619	3.11712	2.92728	2.99314	3.15429	3.35298	3.22157
asparagine-synthetase	0.0402896	0.0019697	18	12	0.193718	4.14815	4.14175	4.2657	4.44254	4.36536	4.49276	4.55243	4.5698	4.21489	4.11266	4.11325
CG4096	0.0402896	0.0019697	24	15	0.19356	2.60424	2.56233	2.50523	2.6536	2.67687	2.94073	3.05749	2.84108	2.79353	2.92232	2.66531
Pdi	0.0402896	0.0019697	18	9	0.192237	7.38492	7.39961	7.38547	7.64644	7.8303	7.5885	7.56216	7.69656	7.39226	7.50593	7.44532
path	0.0402896	0.0019697	24	21	0.191901	7.29596	7.29046	7.31587	7.11139	7.07354	7.06147	7.1525	7.17912	7.44958	7.53733	7.50275
Doa	0.0402896	0.0019697	18	0	0.189643	5.88973	5.87814	5.84453	5.64049	5.26924	5.62668	5.68649	5.55694	5.8223	5.71002	5.83493
CG17386	0.0402896	0.0019697	24	3	0.188167	2.78545	2.69437	2.78391	2.63616	2.49565	2.34213	2.28782	2.29791	2.48139	2.51049	2.54554
CG6218	0.0402896	0.0019697	24	0	0.185493	4.71064	4.81395	4.73295	4.47545	4.59917	4.38651	4.46112	4.41841	4.66364	4.6816	4.75031
CG16986	0.0402896	0.0019697	24	6	0.185138	6.7805	6.76334	6.73107	6.82712	6.95073	6.53466	6.52437	6.66791	6.45648	6.48403	6.5596
Cyp4d1	0.0402896	0.0019697	24	15	0.184782	2.33487	2.2747	2.30204	2.43253	2.44275	2.68877	2.75202	2.57984	2.52901	2.62374	2.59593
wac	0.0402896	0.0019697	18	6	0.183983	2.05313	2.11442	2.19841	2.50719	2.45139	2.03499	1.97136	2.18096	2.21524	2.24466	2.34807
CG6891	0.0402896	0.0019697	24	9	0.183696	3.47158	3.52495	3.51288	3.72123	3.71927	3.69926	3.61747	3.75395	3.17514	3.43827	3.35889
CG9125	0.0402896	0.0019697	18	9	0.183283	2.58014	2.63913	2.69167	2.93767	2.95566	2.80625	2.82937	2.9982	2.73473	2.78896	2.78215
CG14696	0.0402896	0.0019697	24	9	0.183222	2.97222	3.02785	2.97575	3.39664	3.29073	3.1536	3.22818	3.22369	2.96237	3.01103	2.89959
mal	0.0402896	0.0019697	24	9	0.180534	3.16341	3.16243	3.25836	3.51811	3.46177	3.21705	3.33425	3.24755	2.94972	3.14741	2.98655
Alk	0.0402896	0.0019697	24	21	0.178973	3.82095	3.79416	3.80525	3.42567	3.11393	3.70031	3.68522	3.54193	3.91876	3.80147	3.90713
Cyp1	0.0402896	0.0019697	18	9	0.177593	8.5452	8.50769	8.49913	8.76391	8.92524	8.74522	8.73874	8.78524	8.56968	8.74321	8.6525
Spn28D	0.0402896	0.0019697	18	12	0.175928	4.50707	4.63562	4.44287	4.7799	4.80924	4.90487	4.89418	4.84314	4.25806	4.53362	4.28938
CG33275	0.0402896	0.0019697	24	15	0.174704	3.91004	3.92263	3.95031	4.21686	3.98176	4.3605	4.31228	4.23533	4.00074	4.22259	4.07022
CG18812	0.0402896	0.0019697	18	0	0.174338	6.41039	6.43474	6.40078	6.16493	6.00936	6.26001	6.23375	6.15314	6.23669	6.26562	6.35501
fw	0.0402896	0.0019697	24	15	0.172421	1.85382	1.88509	1.8406	1.90432	2.00811	2.32209	2.23654	2.18978	1.91304	2.12675	1.93453
CG9596	0.0402896	0.0019697	18	9	0.171278	2.63049	2.71222	2.69168	2.95037	3.17089	2.83945	2.89764	2.89816	2.85111	2.88506	2.80648
PKD	0.0402896	0.0019697	24	12	0.171148	5.00081	4.97936	4.96095	5.26478	5.20303	5.32693	5.44496	5.38698	5.17907	5.32574	5.17578
CG4199	0.0402896	0.0019697	24	12	0.169544	4.71647	4.70428	4.73749	4.9566	4.99348	5.02512	5.12579	4.9876	4.75887	4.93953	4.95906
CG15161	0.0402896	0.0019697	18	9	0.169229	1.39997	1.44932	1.31506	1.59064	1.7913	1.70547	1.54077	1.56754	1.40929	1.47426	1.45709
CG10217	0.0402896	0.0019697	18	9	0.168929	4.21602	4.3908	4.2871	4.62644	4.62329	4.53926	4.46361	4.49696	4.39223	4.52418	4.44987
CG6673	0.0402896	0.0019697	24	9	0.168846	5.87555	5.90412	5.89182	6.03004	6.18065	6.05706	5.95307	6.03297	5.75378	5.70695	5.75306
GstE8	0.0402896	0.0019697	24	9	0.167857	5.59675	5.4446	5.52162	5.64301	5.77201	5.64661	5.73442	5.60697	5.34834	5.40083	5.40742
psh	0.0402896	0.0019697	24	12	0.167447	4.72314	4.73263	4.7129	4.91319	5.03718	5.1063	5.11605	5.10749	4.87061	5.04784	4.87918
Ork1	0.0402896	0.0019697	18	0	0.166032	3.50086	3.4396	3.46556	3.12843	2.96213	3.31471	3.39475	3.28117	3.33405	3.41687	3.34102
Idgf2	0.0402896	0.0019697	24	6	0.165774	7.16374	7.23303	7.15709	7.32679	7.40693	7.2268	7.14106	7.06881	6.77193	7.01508	6.9049
CG11779	0.0402896	0.0019697	18	0	0.16424	5.28548	5.3663	5.33716	5.08649	5.05592	5.1255	5.14142	5.04567	5.20163	5.16228	5.22177
CG5849	0.0402896	0.0019697	24	0	0.161257	3.08127	3.04177	3.08737	2.80931	2.72808	2.74811	2.716	2.73788	2.85938	2.91988	2.82695
CG6767	0.0402896	0.0019697	24	12	0.157909	6.71077	6.66928	6.60496	6.87721	6.93218	6.93522	7.01296	6.90869	6.69948	6.72367	6.86581
Dhap-at	0.0402896	0.0019697	24	18	0.157741	3.33318	3.28082	3.31579	3.32156	3.09588	3.39714	3.44851	3.41417	3.59342	3.59299	3.59362
CG3226	0.0402896	0.0019697	18	9	0.156349	5.12189	5.16669	5.17043	5.34312	5.44245	5.32993	5.39225	5.3525	5.27307	5.17367	5.30265
coro	0.0402896	0.0019697	18	9	0.156037	6.02579	6.05137	5.96338	6.32159	6.21123	6.25861	6.25989	6.11261	6.07484	6.08112	6.07601
CG8331	0.0402896	0.0019697	18	9	0.155215	6.86838	6.90642	6.92423	7.09756	7.34026	7.13804	7.06225	7.09358	6.95909	7.06583	7.01842
Bmcp	0.0402896	0.0019697	24	15	0.154183	4.03445	3.97526	4.14749	4.18072	4.23823	4.37138	4.44989	4.46941	4.1911	4.20043	4.26111
ninaB	0.0402896	0.0019697	18	12	0.153823	2.05541	2.17462	2.04362	2.09652	2.0849	2.36703	2.26397	2.38151	1.92951	2.00738	1.95705
CG4716	0.0402896	0.0019697	18	3	0.152986	10.4571	10.4754	10.4445	10.1272	10.3172	10.1143	10.1775	10.2344	10.5722	10.6419	10.8054
CG8586	0.0402896	0.0019697	24	12	0.152717	6.69688	6.66654	6.58689	6.86353	6.94335	6.96152	7.00743	6.8981	6.72172	6.88238	6.80835
Gip	0.0402896	0.0019697	18	12	0.152325	6.39552	6.25706	6.33962	6.37158	6.53883	6.49927	6.63167	6.61484	5.93121	5.96438	5.80691
Myo28B1	0.0402896	0.0019697	24	6	0.151899	2.42696	2.46166	2.42632	2.63316	2.51043	2.32929	2.22317	2.36822	2.33664	2.11434	2.19419
Takl2	0.0402896	0.0019697	24	9	0.15158	2.01755	2.01803	2.02291	2.30611	2.4715	2.12032	2.09447	2.23216	2.02136	2.01342	1.73907
CG4822	0.0402896	0.0019697	24	18	0.151235	5.19627	5.31446	5.19516	5.17443	5.16983	5.19795	5.29402	5.31535	5.52301	5.47464	5.6625
CG2064	0.0402896	0.0019697	18	12	0.151059	3.79893	3.86966	3.6559	3.93798	3.88085	4.09997	4.0778	3.97221	3.60603	3.75502	3.77129
CG1532	0.0402896	0.0019697	18	9	0.148957	5.78397	5.80195	5.85578	6.00883	6.13584	6.00621	5.99841	6.03632	5.88657	5.83613	5.85925
CG7772	0.0402896	0.0019697	24	3	0.148926	6.31206	6.30943	6.25813	6.167	6.30851	5.96339	6.03831	5.99076	6.12054	6.09599	6.19176
gbb	0.0402896	0.0019697	18	9	0.146369	4.63299	4.64391	4.59946	4.85614	5.08979	4.81426	4.80093	4.80122	4.69476	4.80573	4.73645
CG9394	0.0402896	0.0019697	18	12	0.145046	5.27035	5.28616	5.32046	5.36735	5.57267	5.50951	5.49123	5.65112	5.21902	5.12614	5.1579
scramb2	0.0402896	0.0019697	24	12	0.144985	4.75523	4.78605	4.70994	5.00626	5.09652	5.1083	5.03199	5.04322	4.92963	4.99108	4.94924
CG11695	0.0402896	0.0019697	18	9	0.144773	3.33502	3.19885	3.30167	3.52482	3.69414	3.4833	3.41074	3.43133	3.3949	3.45651	3.38062
Pde8	0.0402896	0.0019697	18	0	0.143748	4.43201	4.49738	4.50044	4.2505	3.99727	4.36831	4.39881	4.26294	4.46487	4.40626	4.48703
Tehao	0.0402896	0.0019697	18	6	0.14174	2.65541	2.67472	2.61039	2.74999	2.77544	2.38823	2.24039	2.4272	2.68664	2.65702	2.75669
Plod	0.0402896	0.0019697	24	15	0.140399	3.12043	3.07835	3.18454	3.26401	3.19907	3.47308	3.432	3.35119	3.27195	3.27661	3.44492
Rpd3	0.0402896	0.0019697	24	9	0.139189	4.26775	4.34511	4.28122	4.53116	4.52358	4.32449	4.35889	4.33072	4.12178	4.20036	4.13974
mthl5	0.0402896	0.0019697	18	12	0.138103	2.69215	2.74532	2.64129	2.85794	2.86878	2.99036	2.93985	2.94007	2.58906	2.69645	2.57027
mwh	0.0402896	0.0019697	18	12	0.136682	2.51562	2.46731	2.36643	2.51438	2.59606	2.71376	2.67108	2.6627	2.32294	2.43249	2.28205
sPLA2	0.0402896	0.0019697	18	3	0.136131	5.34052	5.27541	5.25351	5.0439	5.11547	4.86034	5.13905	5.03263	5.46915	5.51377	5.59826
CG7220	0.0402896	0.0019697	18	15	0.134629	5.78871	5.76965	5.76235	5.58141	5.63759	5.97021	6.02998	5.96876	5.65273	5.48264	5.66149
CG11221	0.0402896	0.0019697	18	15	0.133477	2.56911	2.54248	2.48504	2.31878	2.31737	2.66912	2.68285	2.49787	2.38874	2.45274	2.36421
Ddc	0.0402896	0.0019697	24	12	0.131623	5.67838	5.73242	5.60666	5.79604	5.88249	5.98704	5.9077	5.96789	5.75527	5.80903	5.70939
CG8314	0.0402896	0.0019697	18	9	0.131256	4.64062	4.579	4.60534	4.82861	4.93335	4.70969	4.76225	4.76841	4.69485	4.7463	4.74865
Dh44	0.0402896	0.0019697	24	21	0.128101	2.30939	2.26836	2.21704	2.03594	2.04044	2.23865	2.10485	2.2457	2.33759	2.39585	2.37678
CG14688	0.0402896	0.0019697	18	3	0.127464	6.4668	6.42126	6.38428	6.34591	6.3758	6.25404	6.20947	6.13344	6.45548	6.4222	6.57435
CR33294	0.0402896	0.0019697	18	6	0.127423	2.12769	2.17709	2.21566	2.33585	2.38666	2.08481	2.06448	1.99819	2.3154	2.32174	2.44414
Gfat2	0.0402896	0.0019697	18	9	0.126131	4.00226	4.06649	4.03112	4.23283	4.27063	4.08742	4.20651	4.21844	4.12302	4.17573	4.07003
CG5987	0.0402896	0.0019697	24	15	0.12579	1.72013	1.78777	1.82821	1.85303	1.92065	1.96231	2.07085	2.06931	1.89011	1.95528	2.03659
Skeletor	0.0402896	0.0019697	18	3	0.12355	3.18892	3.31882	3.22214	3.08737	3.19395	3.01546	3.07025	2.93338	3.30546	3.51221	3.3938
CG10688	0.0402896	0.0019697	24	9	0.123192	4.51723	4.50476	4.48425	4.70651	4.94726	4.55232	4.49966	4.67671	4.39635	4.39064	4.42934
nAcRbeta-21C	0.0402896	0.0019697	18	12	0.123125	4.75529	4.78914	4.73752	4.84167	4.87546	4.92776	4.96845	5.03979	4.57364	4.76773	4.4326
CG9238	0.0402896	0.0019697	18	12	0.12309	7.6908	7.51049	7.63975	7.6982	7.64635	7.81713	7.77452	7.88437	7.38156	7.47464	7.51122
Cyp9f2	0.0402896	0.0019697	24	6	0.122447	7.49873	7.57031	7.51802	7.60672	7.6414	7.49133	7.33219	7.44636	7.30968	7.41392	7.37448
CG11069	0.0402896	0.0019697	24	15	0.120829	2.46389	2.37036	2.3899	2.48751	2.53088	2.75376	2.63269	2.71	2.48734	2.62937	2.54047
sec13	0.0402896	0.0019697	18	9	0.11983	5.21076	5.23443	5.27608	5.44277	5.63425	5.35387	5.3869	5.38463	5.30724	5.38235	5.37895
Tbh	0.0402896	0.0019697	24	21	0.117774	3.09404	2.95786	3.07205	2.85578	2.61018	2.94763	2.94183	2.97963	3.30615	3.08623	3.11175
Vdup1	0.0402896	0.0019697	18	3	0.117715	5.35914	5.41448	5.33377	5.31891	5.37591	5.24796	5.15248	5.1383	5.42106	5.5023	5.46069
CG31103	0.0402896	0.0019697	18	12	0.117515	5.91437	6.00778	5.95541	6.17975	6.18418	6.34816	6.16169	6.18732	5.78593	5.81435	5.74764
glob1	0.0402896	0.0019697	18	3	0.116742	6.95978	6.90681	6.99991	6.67534	6.81761	6.66363	6.82123	6.65067	7.02393	7.15007	7.04635
CG4069	0.0402896	0.0019697	18	6	0.116722	2.63177	2.62178	2.71658	2.78832	2.96943	2.56141	2.57591	2.56249	2.90041	2.78771	2.86826
CG14523	0.0402896	0.0019697	18	12	0.114775	3.78608	3.7869	3.69409	3.831	3.86641	4.03733	3.98074	3.90439	3.65563	3.77787	3.74621
CG11739	0.0402896	0.0019697	18	3	0.114675	6.1743	6.18256	6.17648	5.99425	6.12797	5.95329	6.00098	6.01734	6.37323	6.37916	6.4466
Rip11	0.0402896	0.0019697	24	15	0.113536	5.07329	5.10359	5.04384	5.13076	5.05797	5.40185	5.36581	5.23861	5.15597	5.19781	5.2066
CG33523	0.0402896	0.0019697	24	9	0.112165	5.58508	5.636	5.59065	5.87837	5.79706	5.70743	5.64636	5.66769	5.45572	5.61922	5.53034
CG34195	0.0402896	0.0019697	18	6	0.111972	2.77436	2.66735	2.69881	2.94385	3.00092	2.66317	2.62815	2.73697	2.8459	2.81321	2.87197
CG12171	0.0402896	0.0019697	18	12	0.111378	5.47049	5.4017	5.47775	5.56648	5.67976	5.55666	5.72654	5.7405	5.09339	5.31071	5.14287
CG10103	0.0402896	0.0019697	24	12	0.110914	4.93549	4.98652	4.93514	5.14394	5.15559	5.13942	5.2268	5.16065	5.02098	5.06143	5.07469
Cyp49a1	0.0402896	0.0019697	24	6	0.110729	1.82661	1.86989	1.76201	1.92945	2.02889	1.84208	1.74866	1.73686	1.67363	1.62724	1.71245
CG18437	0.0402896	0.0019697	24	21	0.109819	3.92354	3.85412	3.863	3.7158	3.4238	3.75045	3.75146	3.81169	4.05101	3.8818	3.90601
Adf1	0.0402896	0.0019697	18	6	0.109645	4.41949	4.33343	4.47429	4.51482	4.52517	4.3378	4.32385	4.31173	4.43637	4.5013	4.49859
E(bx)	0.0402896	0.0019697	24	21	0.109395	4.16172	4.12111	4.12915	4.06301	3.57156	4.07811	4.01981	3.99534	4.25892	4.19135	4.20604
spz	0.0402896	0.0019697	18	12	0.10904	4.64518	4.71956	4.60303	4.89273	4.80368	4.98601	4.8439	4.80621	4.44534	4.48992	4.43331
Gfat1	0.0402896	0.0019697	24	18	0.104558	5.41602	5.45234	5.37267	5.4134	5.27968	5.55257	5.48582	5.46228	5.54176	5.80201	5.57589
Fmr1	0.0402896	0.0019697	18	0	0.103789	4.6946	4.67778	4.71719	4.57056	4.35604	4.63049	4.57187	4.52031	4.65191	4.67868	4.66388
pgant5	0.0402896	0.0019697	24	18	0.102969	4.69535	4.68041	4.70284	4.60584	4.32887	4.82712	4.75681	4.76438	4.91263	4.81499	4.81935
CG8837	0.0402896	0.0019697	18	9	0.102852	2.88349	2.83371	2.93473	3.29795	3.05169	3.02611	2.95115	3.03178	2.9396	3.02809	2.94248
oa2	0.0402896	0.0019697	18	0	0.101363	1.99132	1.98825	2.0303	1.85783	1.77551	1.92508	1.82624	1.89294	1.96907	1.91663	1.97722
fat-spondin	0.0402896	0.0019697	24	21	0.10007	6.38268	6.35042	6.33377	6.21485	6.18045	6.25608	6.33022	6.36623	6.42285	6.5589	6.42504
par-1	0.0402896	0.0019697	24	21	0.0985334	5.2534	5.21943	5.22389	5.15091	4.76225	5.16114	5.12415	5.10306	5.28269	5.29341	5.31008
CG32809	0.0402896	0.0019697	24	21	0.0982316	4.36026	4.2941	4.28184	4.26194	3.76731	4.22105	4.27117	4.22374	4.43484	4.38381	4.40934
CG2269	0.0402896	0.0019697	24	21	0.0980554	5.83542	5.78904	5.8615	5.64828	5.42662	5.78843	5.7488	5.76817	5.9976	5.825	5.89955
Fpps	0.0402896	0.0019697	24	15	0.0977471	3.95533	4.10064	4.05596	4.03358	4.12233	4.19648	4.19626	4.29418	4.13862	4.13199	4.19466
lute	0.0402896	0.0019697	24	21	0.0972095	4.19408	4.24862	4.28666	4.14795	3.96914	4.15042	4.20779	4.23988	4.36616	4.37144	4.36353
Dph5	0.0402896	0.0019697	18	6	0.0966703	4.07818	4.15524	4.14953	4.27129	4.5712	3.99501	4.13423	4.08447	4.2406	4.25877	4.1825
CR18217	0.0402896	0.0019697	18	6	0.0953332	2.11219	2.16751	2.22198	2.27882	2.43431	2.13163	2.02459	2.10373	2.21828	2.27267	2.26656
Ice1	0.0402896	0.0019697	24	21	0.0950458	2.06654	2.00857	2.08139	1.92339	1.92532	1.93788	1.95398	1.97234	2.14268	2.12103	2.0409
CG2145	0.0402896	0.0019697	24	6	0.0945317	6.46766	6.54926	6.49146	6.49681	6.57459	6.38561	6.49142	6.44147	6.22127	6.37067	6.31051
bai	0.0402896	0.0019697	18	9	0.093756	6.53369	6.60723	6.6174	6.74491	6.95135	6.69499	6.71013	6.67017	6.66994	6.68539	6.69233
Prm	0.0402896	0.0019697	24	6	0.0931953	8.28998	8.26507	8.27478	8.32049	8.26861	8.26222	8.23174	8.16341	8.11796	8.03895	8.10769
Snx1	0.0402896	0.0019697	18	9	0.0930485	4.28201	4.29098	4.27687	4.46954	4.40025	4.41103	4.36438	4.4345	4.33998	4.35611	4.32112
kek6	0.0402896	0.0019697	24	21	0.0929262	2.34246	2.36906	2.44594	2.20979	1.95957	2.31345	2.3156	2.32103	2.46773	2.3733	2.38563
S6kII	0.0402896	0.0019697	24	21	0.0919046	2.64422	2.68107	2.74938	2.59462	2.43343	2.67451	2.63156	2.62091	2.81267	2.74066	2.77158
CG2162	0.0402896	0.0019697	24	0	0.091722	4.93315	4.94219	5.01124	4.81774	4.82513	4.7288	4.78475	4.72614	4.81513	4.87116	4.87022
CG5315	0.0402896	0.0019697	24	18	0.0913234	7.65113	7.68161	7.63388	7.61071	7.58801	7.74412	7.77945	7.74125	7.76331	7.7587	7.84804
Exn	0.0402896	0.0019697	24	18	0.0906019	4.03706	4.00018	3.99558	3.93854	3.87407	4.01397	4.09923	4.01228	4.13297	4.1989	4.1005
mRNA-cap	0.0402896	0.0019697	18	9	0.0881995	5.00075	5.05117	5.02332	5.16961	5.17296	5.13835	5.16356	5.13377	5.12572	5.16229	5.11981
Ndfip	0.0402896	0.0019697	18	9	0.087269	5.00943	5.02111	5.01908	5.17955	5.16985	5.13863	5.07701	5.06736	5.04051	5.06496	5.10763
Orct	0.0402896	0.0019697	18	12	0.085823	4.17438	4.20465	4.17527	4.32926	4.37905	4.347	4.33745	4.4392	3.9723	4.10939	4.13184
CG5630	0.0402896	0.0019697	18	9	0.0827516	6.02453	5.98998	6.00997	6.14302	6.21707	6.12553	6.11271	6.05111	6.06735	6.04355	6.10236
dap	0.0402896	0.0019697	24	6	0.0826753	3.51447	3.50275	3.4896	3.57625	3.52583	3.51121	3.44057	3.45732	3.37705	3.30301	3.34848
Ugt86Dc	0.0402896	0.0019697	18	12	0.0823293	1.44993	1.41237	1.46408	1.54418	1.5169	1.59561	1.52885	1.6529	1.27806	1.43625	1.17284
CG31648	0.0402896	0.0019697	18	6	0.0816199	4.59415	4.58674	4.54181	4.67741	4.84686	4.55756	4.49515	4.49199	4.6599	4.62236	4.73348
DNApol-alpha73	0.0402896	0.0019697	24	6	0.0768374	1.36423	1.41914	1.39842	1.47368	1.49243	1.37699	1.30494	1.35408	1.27869	1.28195	1.31601
CG31694	0.0402896	0.0019697	24	6	0.0766228	5.62098	5.63272	5.63996	5.70637	5.68446	5.5687	5.54394	5.58418	5.52376	5.49294	5.57508
CG33217	0.0402896	0.0019697	24	21	0.0764395	2.73619	2.71846	2.71178	2.65354	2.64707	2.70148	2.62861	2.67086	2.82893	2.76776	2.93351
CG9194	0.0402896	0.0019697	24	9	0.0762855	1.66442	1.67013	1.70275	1.80469	1.80268	1.77417	1.7207	1.75519	1.61084	1.69398	1.63854
Dap160	0.0402896	0.0019697	24	21	0.0757874	4.00264	4.00237	4.02374	3.96621	3.55159	3.94948	3.86457	3.96664	4.08214	4.0486	4.04854
Bruce	0.0402896	0.0019697	24	21	0.0754174	4.6412	4.62621	4.62912	4.60447	3.84437	4.59958	4.62472	4.52252	4.71719	4.76181	4.68056
CG7927	0.0402896	0.0019697	18	9	0.0742455	4.5339	4.54968	4.57254	4.68154	4.71894	4.67354	4.62575	4.6206	4.56566	4.56845	4.58892
CG12766	0.0402896	0.0019697	18	12	0.0738018	4.67502	4.62604	4.7117	4.77334	4.89801	4.7814	4.79095	4.9162	3.43431	3.61126	3.3055
CG5961	0.0402896	0.0019697	18	6	0.0722371	4.30507	4.27874	4.26408	4.40567	4.53327	4.22124	4.2043	4.26996	4.30968	4.33066	4.30062
CG15717	0.0402896	0.0019697	24	9	0.071596	4.58055	4.50054	4.55523	4.69667	4.78993	4.58682	4.58134	4.60055	4.44149	4.53433	4.53431
CG15803	0.0402896	0.0019697	24	21	0.0709589	2.57641	2.49081	2.57366	2.46837	2.00776	2.56134	2.47266	2.54947	2.67096	2.58828	2.58581
CG7028	0.0402896	0.0019697	24	18	0.070274	3.62554	3.63799	3.60586	3.61539	3.45929	3.67312	3.72681	3.64269	3.74303	3.69595	3.76717
CG4629	0.0402896	0.0019697	24	21	0.0701699	4.43629	4.38974	4.33726	4.27159	4.30079	4.333	4.34172	4.32204	4.39758	4.44402	4.44073
CG8908	0.0402896	0.0019697	18	15	0.0699474	1.59593	1.51386	1.51071	1.47518	1.41337	1.64955	1.61805	1.52726	1.47223	1.49291	1.50507
CG5073	0.0402896	0.0019697	18	3	0.0691839	5.71924	5.74634	5.65541	5.6387	5.69015	5.65509	5.50171	5.55547	5.85784	5.82983	5.89774
CG13995	0.0402896	0.0019697	18	0	0.0677475	2.53431	2.53767	2.60741	2.41597	2.36082	2.50596	2.47796	2.51779	2.52492	2.54678	2.53235
CG13344	0.0402896	0.0019697	24	18	0.0660721	3.41156	3.34393	3.37637	3.30797	3.29652	3.44259	3.39499	3.43411	3.43986	3.44459	3.52137
chif	0.0402896	0.0019697	24	21	0.0652281	3.54615	3.53267	3.55899	3.47483	3.22628	3.54067	3.51865	3.47032	3.63455	3.59189	3.63129
CG42575	0.0402896	0.0019697	18	3	0.0628915	5.33918	5.3264	5.2952	5.28695	5.18768	5.28398	5.1726	5.17525	5.43007	5.33595	5.35432
Ctr1A	0.0402896	0.0019697	18	12	0.0626383	4.72616	4.77219	4.73143	4.80107	4.81774	4.86333	4.88706	4.84112	4.709	4.75939	4.71527
VhaSFD	0.0402896	0.0019697	18	0	0.0624112	7.41159	7.44263	7.42683	7.32555	7.32341	7.37714	7.37495	7.30287	7.39645	7.38443	7.39016
CG2807	0.0402896	0.0019697	24	21	0.0600892	4.13788	4.18266	4.12047	4.08983	4.05498	4.05958	4.10473	4.09409	4.1436	4.20454	4.19639
crol	0.0402896	0.0019697	24	21	0.058266	5.3693	5.3441	5.30454	5.29059	4.86923	5.30046	5.32571	5.22945	5.37519	5.38567	5.37079
Ir76b	0.0402896	0.0019697	18	12	0.0581291	1.33008	1.64779	1.29888	1.69097	1.66888	1.69718	1.71359	1.71657	1.2631	1.61295	1.11065
hppy	0.0402896	0.0019697	24	18	0.0576667	4.15629	4.17073	4.22132	4.209	3.94524	4.23659	4.23287	4.22769	4.33463	4.29181	4.27839
Trx-2	0.0402896	0.0019697	24	6	0.0559919	7.0914	7.12897	7.16515	7.21101	7.55443	7.05862	7.08682	7.09358	7.05583	7.08589	7.04987
CG30394	0.0402896	0.0019697	18	3	0.0537044	3.54726	3.65506	3.60098	3.59722	3.5396	3.52282	3.52113	3.5214	3.73542	3.64596	3.71675
l(3)72Ab	0.0402896	0.0019697	24	21	0.0523796	4.13341	4.14229	4.12229	4.08899	3.86425	4.11228	4.08016	4.03307	4.17073	4.17367	4.15251
CG11357	0.0402896	0.0019697	18	12	0.051779	3.72147	3.84887	3.86963	3.90081	3.90508	3.94429	3.92066	3.96759	3.73342	3.5658	3.76453
capu	0.0402896	0.0019697	18	12	0.051133	3.5309	3.46478	3.52239	3.5851	3.56213	3.59477	3.60304	3.64823	3.50336	3.50076	3.46235
Elp3	0.0402896	0.0019697	18	6	0.0449547	3.59579	3.64966	3.61399	3.77814	3.80569	3.60074	3.61098	3.59157	3.70014	3.68878	3.77113
danr	0.0402896	0.0019697	24	18	0.0443402	1.98673	1.98622	1.91663	1.98343	1.96529	2.01593	2.01807	2.01869	2.03707	2.06923	2.06123
Nup44A	0.0402896	0.0019697	18	12	0.0429171	3.99658	3.99739	3.97279	4.05254	4.09343	3.99758	4.13203	4.14126	3.88517	3.87562	3.89292
Bap170	0.0402896	0.0019697	18	3	0.0323155	3.00436	2.99241	3.01856	2.98857	2.91371	2.94575	2.88177	2.97977	3.05852	3.10851	3.19499
Nup98-96	0.0402896	0.0019697	24	21	0.0295894	3.96067	3.9543	3.96785	3.93602	3.7943	3.94486	3.95473	3.90019	3.9776	3.99519	3.98351
Dscam	0.0402896	0.0019697	24	18	0.0226805	2.19683	2.18821	2.19608	2.16181	1.81059	2.22435	2.21011	2.20959	2.22896	2.2201	2.21055
CG18609	0.0620991	0.00515151	24	21	1.26718	4.55048	4.74025	5.10988	3.45542	3.16816	1.92807	3.38968	4.47227	5.23782	5.43639	5.48642
CG11368	0.0620991	0.00515151	24	9	1.07625	5.56071	5.47096	5.54395	7.04644	7.016	6.94671	7.01256	6.65559	4.30218	6.65277	4.02411
Obp49a	0.0620991	0.00515151	24	9	1.03992	4.59583	4.39923	4.28764	5.80933	6.02871	5.75732	5.789	5.49121	3.70191	5.47682	3.72716
LysE	0.0620991	0.00515151	18	9	0.982313	5.4071	5.51507	5.42071	6.36632	7.10008	6.76522	6.89826	6.93535	6.0063	5.5439	5.87268
CG11407	0.0620991	0.00515151	24	3	0.863746	6.40948	6.41887	6.00684	6.15646	6.16202	5.04605	4.82472	4.78514	4.94067	5.79882	5.10752
CG32984	0.0620991	0.00515151	24	3	0.709228	5.40172	5.17495	5.43896	4.70369	4.21179	3.49031	3.4546	3.92288	4.23462	4.42227	4.39448
LysB	0.0620991	0.00515151	18	9	0.7018	6.57756	6.53952	6.63153	7.15163	7.8985	7.41815	7.58355	7.75963	7.12338	6.85515	6.85768
bgm	0.0620991	0.00515151	24	3	0.633323	6.38183	6.31634	6.30036	6.09883	6.12431	5.32676	5.28355	5.35304	5.25029	5.39588	5.49876
Clk	0.0620991	0.00515151	24	6	0.624464	3.42275	3.35892	3.30057	3.55665	3.04921	2.54915	2.62213	2.59611	2.23859	2.20351	2.21743
CheB53b	0.0620991	0.00515151	24	9	0.615254	1.77622	1.79245	1.98371	2.91757	2.70135	2.37332	2.46315	1.93526	1.23217	1.85764	1.08722
CG15263	0.0620991	0.00515151	24	21	0.608929	6.68712	6.53319	6.54021	6.48234	5.99556	5.91014	6.48514	6.11758	7.35831	7.74865	7.61018
Tsp47F	0.0620991	0.00515151	24	9	0.575985	2.70889	2.91035	2.74525	3.58574	3.6338	3.57111	3.32167	3.31775	2.27382	3.231	2.29942
tnc	0.0620991	0.00515151	24	0	0.514749	3.63232	3.64655	3.60384	3.26206	2.70303	2.7539	2.83844	2.6917	3.2225	3.52896	3.31773
CG31777	0.0620991	0.00515151	18	0	0.512472	5.74841	5.73659	5.61738	4.88587	5.21138	4.9418	4.92389	4.99079	5.32659	5.43191	5.5408
snoRNA:Psi28S-2442b	0.0620991	0.00515151	18	0	0.499085	3.04865	2.43862	2.29653	1.67192	1.65576	1.69384	1.58524	1.77626	1.74082	1.90077	2.18753
GstE9	0.0620991	0.00515151	24	6	0.486991	7.73819	7.75041	7.73395	7.65313	7.8252	7.18892	7.25659	7.23325	6.80377	7.04418	6.94401
CG15126	0.0620991	0.00515151	24	6	0.452538	3.0432	3.15723	3.41012	3.75432	3.9491	2.75164	2.76139	3.10238	2.67236	2.92889	2.55586
Obp50a	0.0620991	0.00515151	24	9	0.439011	1.40508	1.57536	1.26502	2.03159	2.13966	1.99462	1.8313	1.95591	1.25308	1.6448	1.2504
Jon99Ciii	0.0620991	0.00515151	24	15	0.431095	7.83306	7.62287	8.07903	7.81095	8.14909	9.17251	8.87337	8.76194	8.20277	8.22297	8.08927
CG11453	0.0620991	0.00515151	24	6	0.427246	3.49391	3.19255	3.08888	3.60861	3.7254	2.99711	2.79704	2.98889	2.61028	3.01168	2.46753
CG3842	0.0620991	0.00515151	24	12	0.406885	4.72352	4.76833	4.66093	5.24999	5.26122	5.37625	5.37487	5.3	4.7338	5.11504	4.69831
Cyp6a17	0.0620991	0.00515151	24	3	0.399508	6.8472	6.92756	6.76325	6.6939	6.91527	6.29077	6.16363	6.12638	6.3153	6.38679	6.28471
Fmo-1	0.0620991	0.00515151	18	0	0.388812	4.03369	3.98327	4.02962	3.38908	3.59659	3.4566	3.41244	3.48565	3.98308	3.86088	3.9366
CG7724	0.0620991	0.00515151	24	6	0.38707	5.29325	5.27724	4.98496	5.46845	5.45311	4.99797	5.01198	4.71531	4.26227	4.95567	4.4617
CG10157	0.0620991	0.00515151	18	9	0.383617	4.6335	4.78479	4.88326	5.33018	5.4655	5.17314	5.24008	5.44136	4.93236	5.00832	5.24637
rost	0.0620991	0.00515151	24	0	0.374023	5.1209	4.78443	4.65257	4.28864	4.22641	4.16936	4.11491	4.20052	4.70727	4.65812	4.72076
SPE	0.0620991	0.00515151	18	9	0.369855	7.27351	7.39946	7.18195	7.77798	7.953	7.83052	7.81524	7.79361	7.54714	7.71466	7.6881
CG43093	0.0620991	0.00515151	24	6	0.360857	7.64223	7.76104	7.53313	7.80955	7.91404	7.54374	7.21325	7.363	6.90179	7.39618	7.01158
CG13283	0.0620991	0.00515151	24	3	0.359633	4.61911	4.62467	4.49022	4.3162	4.33548	4.02867	3.86517	3.89883	3.87132	3.98527	4.10687
obst-B	0.0620991	0.00515151	24	6	0.344734	2.95591	3.16087	3.01452	3.29108	3.49886	2.97884	3.04345	2.91325	2.32762	2.63367	2.42965
mir-986	0.0620991	0.00515151	24	18	0.344455	2.18973	1.32748	2.2619	2.07755	1.67074	2.44523	2.33963	2.24388	2.55229	2.56658	2.75547
CG9886	0.0620991	0.00515151	24	21	0.343608	4.55637	4.33192	4.44489	3.96228	4.06965	3.97723	4.00703	4.13454	4.49403	4.6083	4.5598
CG7675	0.0620991	0.00515151	24	9	0.343528	5.02416	5.12773	5.04795	5.61186	5.68413	5.49406	5.48898	5.40361	4.88258	5.21602	4.91273
CG31207	0.0620991	0.00515151	24	6	0.338464	6.1843	6.35033	6.10592	6.23393	6.6252	6.03234	5.79364	5.74999	5.55803	5.89854	5.63416
CG8665	0.0620991	0.00515151	24	12	0.323346	3.58703	3.55522	3.95769	3.95868	4.10671	4.51236	4.43565	4.44802	3.84356	4.05593	4.00065
wbl	0.0620991	0.00515151	24	9	0.321842	1.62238	1.661	1.69431	2.16981	2.21465	1.92233	1.89732	1.80652	1.37171	1.79264	1.26511
cue	0.0620991	0.00515151	24	21	0.31771	5.35065	5.41728	5.33252	5.00228	4.8654	4.95031	4.93517	5.02208	5.42409	5.3992	5.52293
Duox	0.0620991	0.00515151	24	18	0.312127	2.65787	2.84695	2.49764	2.52545	2.51542	3.0432	3.01236	2.8905	3.01704	3.1305	3.08981
CG32369	0.0620991	0.00515151	24	0	0.301621	3.84734	3.83479	3.81691	3.41451	3.04748	3.06517	3.04132	2.96099	3.43414	3.29115	3.28491
Grp	0.0620991	0.00515151	24	12	0.301447	2.31668	2.70259	2.38686	2.83453	2.92753	2.95955	2.99048	2.84262	2.47793	2.71783	2.47277
Idgf1	0.0620991	0.00515151	18	0	0.300592	5.88234	5.93365	5.85538	5.3293	5.50816	5.48451	5.50333	5.45378	5.59308	5.61313	5.78792
Jheh3	0.0620991	0.00515151	24	9	0.297603	5.45557	5.41654	5.41302	5.88239	6.06068	5.63817	5.641	5.80604	5.22324	5.58072	5.1591
CG14394	0.0620991	0.00515151	18	9	0.295231	3.45535	3.64601	3.47501	3.87778	4.13114	4.08914	3.80639	3.90063	3.68983	3.70131	3.6459
pncr004:X	0.0620991	0.00515151	24	9	0.295195	3.05533	3.02271	2.80559	3.59482	3.42684	3.1281	3.05288	2.96022	2.47502	2.77419	2.63618
CG9664	0.0620991	0.00515151	24	12	0.294544	3.93699	3.86892	3.81342	4.47187	4.16564	4.43759	4.50461	4.4775	4.05656	4.30128	4.24817
CG30098	0.0620991	0.00515151	18	9	0.288803	2.9759	3.35792	3.00566	3.72391	3.78901	3.36067	3.53544	3.3957	3.26187	3.01921	3.12872
CG15629	0.0620991	0.00515151	24	9	0.287884	4.01968	4.14238	3.86255	4.3578	4.57132	4.2679	4.22998	4.41745	3.95256	3.86964	3.84025
CG9449	0.0620991	0.00515151	24	9	0.284846	3.5714	3.96361	3.73402	4.00014	4.14341	3.99323	3.97931	4.05591	3.41777	3.8744	3.19088
spin	0.0620991	0.00515151	24	18	0.282526	5.4618	5.50611	5.56036	5.35119	5.22383	5.82761	5.94221	5.83714	5.86337	5.84135	5.87337
GstE2	0.0620991	0.00515151	24	6	0.281316	4.39011	4.55753	4.45097	4.50719	4.54656	4.42127	4.10738	4.32131	3.99424	3.92894	4.03202
alpha-Est10	0.0620991	0.00515151	24	15	0.281109	4.00247	4.04446	3.98003	4.35149	4.22126	4.73842	4.69499	4.67137	4.27831	4.45268	4.20534
CG13841	0.0620991	0.00515151	24	6	0.279373	4.18354	4.31079	4.17949	4.75342	4.99672	4.20995	4.17896	3.96571	3.77106	4.11817	3.89274
NtR	0.0620991	0.00515151	24	9	0.271426	5.0462	5.13516	5.07619	5.35583	5.33307	5.33568	5.2058	5.41666	4.66742	4.95795	4.51571
PGRP-SD	0.0620991	0.00515151	24	18	0.269618	3.82157	3.93442	3.95206	3.78906	4.02248	4.22719	4.05424	4.23526	4.40276	4.24382	4.53739
CG9372	0.0620991	0.00515151	24	6	0.26929	5.91804	6.00728	5.93242	6.18201	6.38878	5.95699	5.84946	5.93	5.42408	5.58901	5.51879
h	0.0620991	0.00515151	24	15	0.26877	5.16641	5.11579	5.10305	5.39052	5.26076	5.52385	5.64205	5.61621	5.60134	5.44148	5.62296
Aldh-III	0.0620991	0.00515151	24	12	0.264115	6.02084	6.08805	6.0712	6.41362	6.396	6.47107	6.53969	6.46912	6.0723	6.42004	6.0992
eater	0.0620991	0.00515151	24	6	0.25876	2.44462	2.56973	2.50712	2.57008	2.4405	2.41247	2.21604	2.39797	2.06556	2.06266	1.80359
sug	0.0620991	0.00515151	24	21	0.2543	4.95236	4.68608	4.70611	4.5821	4.53546	4.60647	4.62555	5.03815	5.30531	5.33453	5.38715
CG17029	0.0620991	0.00515151	24	9	0.2489	4.9842	5.03127	5.12756	5.25449	5.4263	5.14285	4.96272	5.24914	4.67556	4.59649	4.69618
Mmp1	0.0620991	0.00515151	24	12	0.248671	4.2025	4.33204	4.11051	4.48143	4.33705	4.83128	4.73556	4.72962	4.2995	4.38994	4.26249
CG17111	0.0620991	0.00515151	24	12	0.245978	4.62246	4.71619	4.56433	5.08217	5.088	5.13007	5.17381	5.0074	4.78651	5.01599	4.87691
CG1021	0.0620991	0.00515151	24	18	0.243657	4.97435	5.00177	4.99088	5.15833	4.93424	5.24434	5.2693	5.2624	5.38854	5.50119	5.55814
CG10562	0.0620991	0.00515151	24	6	0.243255	5.38573	5.52866	5.4904	5.41784	5.60899	5.26595	5.13177	5.41341	5.07643	5.08459	5.00034
Wnt2	0.0620991	0.00515151	24	12	0.240524	1.2435	1.46437	1.3147	1.5815	1.657	1.78912	1.73135	1.78647	1.32148	1.59102	1.32999
Fuca	0.0620991	0.00515151	24	9	0.238357	3.86308	3.74524	3.59193	3.94503	3.92348	3.82021	3.72408	3.89874	3.22049	3.49914	3.22637
Tsp42Ei	0.0620991	0.00515151	18	9	0.236499	5.71488	5.76242	5.57435	6.03559	6.16571	6.11063	6.01516	5.8894	5.64336	5.87162	5.82368
CG9747	0.0620991	0.00515151	24	15	0.235974	3.0692	3.12313	3.14996	3.35315	3.49824	3.69781	3.79471	3.62836	3.4459	3.33476	3.54172
CG3746	0.0620991	0.00515151	18	9	0.231757	2.70816	2.50291	2.593	3.00852	3.34046	2.82699	2.83433	2.89238	2.72231	2.86236	2.65867
CG6435	0.0620991	0.00515151	24	12	0.230763	5.69773	5.89612	5.74241	6.06122	6.315	6.37348	6.14248	6.13267	5.90271	6.10493	5.93455
CG9631	0.0620991	0.00515151	24	9	0.23038	4.87038	5.00289	4.90182	5.27235	5.35873	5.20895	5.11043	5.12878	4.71931	4.93861	4.87448
CG13568	0.0620991	0.00515151	18	9	0.22939	1.23786	1.33278	1.26502	1.61034	1.66831	1.58786	1.58904	1.59901	1.47374	1.54501	1.20383
CG13315	0.0620991	0.00515151	24	18	0.228879	9.4591	9.47241	9.51347	8.93413	9.06879	9.68684	9.91856	9.72558	9.78378	9.74818	9.74424
Zip3	0.0620991	0.00515151	18	12	0.227403	2.81905	2.91647	2.68912	3.07587	2.8265	3.16333	3.13287	3.19244	2.52725	2.80022	2.75795
CG5224	0.0620991	0.00515151	18	9	0.226802	4.19428	4.17923	4.29452	4.46718	4.84284	4.51464	4.60286	4.50037	4.39352	4.40584	4.39113
CG14153	0.0620991	0.00515151	24	21	0.224685	5.29411	5.4187	5.30868	4.98813	5.10374	5.20745	4.99892	5.04067	5.45134	5.40431	5.5022
CG5840	0.0620991	0.00515151	24	15	0.22376	5.78896	5.74471	5.71318	6.0863	6.15312	6.16888	6.27851	6.30428	6.10456	6.26305	6.21598
fau	0.0620991	0.00515151	18	9	0.222906	7.42084	7.31998	7.46023	7.80044	7.84751	7.7111	7.67837	7.54827	7.63482	7.62111	7.60674
CG8888	0.0620991	0.00515151	18	9	0.220748	4.31689	4.39009	4.24495	4.69127	4.82602	4.4319	4.64008	4.60215	4.52817	4.44556	4.5877
IA-2	0.0620991	0.00515151	24	21	0.21966	6.03381	5.92609	6.02923	5.72087	5.37659	5.78919	5.70271	5.83978	6.24603	5.99693	6.09536
CG12056	0.0620991	0.00515151	18	9	0.219614	3.62865	3.58413	3.55298	3.98184	4.03337	3.73878	3.81066	3.90488	3.62696	3.84079	3.69857
Tsp42Ee	0.0620991	0.00515151	18	9	0.219233	7.45588	7.49077	7.44665	7.74866	7.85753	7.81435	7.67709	7.77395	7.5548	7.65026	7.68784
CG32667	0.0620991	0.00515151	24	18	0.217772	7.60576	7.47329	7.4991	7.46849	7.69688	7.73596	7.82674	7.78942	7.86625	8.06816	7.89842
SP1029	0.0620991	0.00515151	24	15	0.217602	3.47527	3.50073	3.54238	3.67748	3.74411	4.06962	3.97345	4.06693	3.67247	3.86188	3.70336
CG18136	0.0620991	0.00515151	24	0	0.214622	4.94561	4.95789	4.89123	4.59153	4.64823	4.61098	4.49771	4.50429	4.85487	4.60605	4.82826
Fdh	0.0620991	0.00515151	18	9	0.21111	6.01304	6.01232	6.05223	6.31109	6.39983	6.27772	6.31118	6.36045	6.11255	6.28031	6.22853
GNBP3	0.0620991	0.00515151	24	12	0.208847	5.75049	5.79139	5.66525	6.02537	6.10508	6.23985	6.25916	6.20773	5.92106	6.15857	6.02587
CG11360	0.0620991	0.00515151	24	21	0.208038	3.17056	3.05706	3.13504	2.93531	2.58003	2.90928	2.78579	3.01537	3.23442	3.14516	3.40903
Syx1A	0.0620991	0.00515151	24	21	0.205764	3.42137	3.31125	3.2878	3.18619	2.42658	3.10532	3.10811	3.17574	3.47196	3.43436	3.42782
CG2852	0.0620991	0.00515151	18	9	0.205278	7.45184	7.43976	7.46608	7.71177	8.0028	7.58517	7.69601	7.7818	7.60708	7.56995	7.67232
NLaz	0.0620991	0.00515151	24	0	0.200969	8.18138	8.12641	8.08999	7.84898	7.97545	7.53079	7.65162	7.70179	7.80066	7.92266	8.00203
ImpL2	0.0620991	0.00515151	18	15	0.200767	5.85758	5.88101	5.73083	5.57895	5.53451	5.9344	5.99541	6.10748	5.92674	5.70614	5.72592
CG17572	0.0620991	0.00515151	24	9	0.198717	2.71047	2.81079	2.48464	2.89279	2.93205	2.7899	2.82034	2.77114	2.37934	2.65143	2.37567
MED22	0.0620991	0.00515151	18	9	0.198114	3.60059	3.56122	3.57294	3.99193	4.09729	3.77679	3.73874	3.6808	3.59869	3.59888	3.70145
CG32054	0.0620991	0.00515151	18	9	0.196209	2.33529	2.39081	2.35369	2.85324	2.73156	2.58242	2.52717	2.60726	2.57151	2.56536	2.53617
Mical	0.0620991	0.00515151	18	0	0.196071	5.52697	5.50488	5.44315	5.26132	4.40292	5.26134	5.33604	5.09211	5.38912	5.3346	5.3214
CG14591	0.0620991	0.00515151	18	9	0.194826	4.91787	4.85028	4.78082	5.08804	5.21233	5.27514	5.0887	5.05078	5.04416	4.98575	5.03695
CG9396	0.0620991	0.00515151	24	3	0.194232	6.34988	6.51068	6.34352	6.16168	6.19309	5.93946	6.00457	5.91961	5.99714	6.23479	6.11835
CG1806	0.0620991	0.00515151	24	12	0.194211	3.37491	3.20827	3.32125	3.54552	3.66797	3.74122	3.78957	3.59876	3.33265	3.54741	3.54464
CG42806	0.0620991	0.00515151	24	21	0.194003	4.23882	4.34069	4.28256	3.9549	4.17048	4.09547	4.01013	4.15638	4.45062	4.40248	4.37708
CG1698	0.0620991	0.00515151	18	6	0.192033	1.99095	1.93956	2.0744	2.19578	2.27567	1.70538	1.78607	1.78323	2.25155	2.05916	2.20092
burs	0.0620991	0.00515151	24	9	0.190446	1.19167	1.31508	1.40208	1.56027	1.47043	1.50108	1.29192	1.451	1.14124	1.14079	1.08235
yellow-f2	0.0620991	0.00515151	24	12	0.186544	5.44441	5.49425	5.4194	5.7092	5.7979	5.9285	5.95805	5.94158	5.69521	5.86189	5.7198
CG3829	0.0620991	0.00515151	24	18	0.186348	4.90989	4.94086	4.87323	4.93261	4.9082	4.98864	5.16846	5.04469	5.20238	5.27222	5.24798
Src64B	0.0620991	0.00515151	24	21	0.186325	2.96048	2.92032	2.97934	2.91752	2.51075	2.91989	2.88873	2.96646	3.27162	3.1833	3.25359
CG4927	0.0620991	0.00515151	24	6	0.183518	2.49441	2.64043	2.59969	2.90914	2.84959	2.67142	2.43854	2.45621	2.34324	2.37882	2.28053
CG17323	0.0620991	0.00515151	24	3	0.182054	6.55178	6.52316	6.7739	6.39562	6.36181	6.22283	6.17587	6.26007	6.28005	6.12033	6.29521
lbm	0.0620991	0.00515151	18	9	0.181965	4.4653	4.45102	4.4592	4.71245	4.8615	4.75771	4.63371	4.62221	4.5761	4.67591	4.53944
Esyt2	0.0620991	0.00515151	24	6	0.181196	5.22353	5.25667	5.18292	5.44785	5.39331	5.24538	5.21393	5.07907	4.85643	4.93954	4.95441
Dhpr	0.0620991	0.00515151	18	9	0.180906	5.44909	5.42068	5.39775	5.58603	5.83127	5.70807	5.68539	5.63114	5.49249	5.57939	5.57046
CG14630	0.0620991	0.00515151	24	9	0.17819	4.50161	4.4225	4.45348	4.56719	4.74692	4.50097	4.49998	4.62234	4.16349	4.18459	4.26268
CG6231	0.0620991	0.00515151	24	15	0.177705	3.95812	3.96526	3.90301	4.21095	4.07871	4.40936	4.45486	4.29234	4.11501	4.13626	4.32648
Ipk2	0.0620991	0.00515151	24	6	0.177252	3.55761	3.68548	3.72008	3.73951	3.99041	3.49169	3.52933	3.47346	3.26569	3.38012	3.54618
sut1	0.0620991	0.00515151	24	15	0.177023	3.67522	3.57778	3.55084	3.78345	3.6586	3.96093	4.04395	4.16094	3.70303	3.81797	3.7676
CG1213	0.0620991	0.00515151	18	6	0.175971	7.09927	7.1626	7.15922	7.47431	7.52893	7.01313	7.00756	7.22395	7.32684	7.44586	7.38531
CG5639	0.0620991	0.00515151	24	21	0.175586	1.70847	1.70077	1.7439	1.60208	1.54252	1.54109	1.55384	1.64038	1.89297	1.99373	1.91962
wcd	0.0620991	0.00515151	18	6	0.171496	3.01452	2.87355	2.9046	3.06995	3.15823	2.77516	2.6589	2.74501	2.94279	3.08326	2.95427
rgr	0.0620991	0.00515151	18	12	0.168088	2.44507	2.39814	2.51264	2.47365	2.43661	2.75045	2.68073	2.67422	2.31131	2.32285	2.37173
Adgf-D	0.0620991	0.00515151	24	21	0.166303	5.60086	5.67214	5.66712	5.44758	5.46603	5.42658	5.57036	5.62872	5.78578	5.89809	5.86499
CG3662	0.0620991	0.00515151	18	9	0.164822	7.75551	7.81332	7.77502	7.9948	8.08161	8.03763	7.9983	8.00883	7.89002	7.91012	7.89718
CG7458	0.0620991	0.00515151	18	3	0.164634	2.6601	2.62403	2.78913	2.80258	2.59296	2.44597	2.38347	2.51306	2.93949	3.0065	2.85979
cv	0.0620991	0.00515151	18	9	0.163122	4.77766	4.8445	4.73762	5.00416	5.15125	5.07938	5.0012	4.89825	4.79504	4.90007	4.88176
dgt2	0.0620991	0.00515151	18	9	0.163006	3.03788	3.19524	3.2615	3.45268	3.71204	3.37901	3.43172	3.26414	3.29246	3.32574	3.33421
CG15545	0.0620991	0.00515151	18	6	0.162543	1.87885	1.76717	1.77736	2.03903	2.03152	1.64389	1.67989	1.76989	1.79726	1.90901	1.79337
CG8034	0.0620991	0.00515151	24	21	0.160609	3.96048	3.91022	4.03405	3.76149	3.55672	3.92394	3.9488	3.9557	4.07359	4.23402	4.19696
CG9007	0.0620991	0.00515151	24	21	0.158088	3.62734	3.57603	3.60903	3.53699	2.90871	3.42621	3.40734	3.45386	3.74667	3.70183	3.681
CG42514	0.0620991	0.00515151	18	0	0.157975	3.37534	3.52144	3.52136	3.21334	3.06557	3.2962	3.25619	3.36893	3.45714	3.45804	3.43495
Listericin	0.0620991	0.00515151	18	3	0.157974	6.68027	6.68791	6.34572	5.93917	5.88545	5.80686	6.37341	5.8369	7.17324	7.71905	7.445
CG17912	0.0620991	0.00515151	24	21	0.157245	4.12468	4.09149	4.08728	4.00624	3.55931	3.96603	3.905	3.98451	4.21128	4.20789	4.32373
Ost48	0.0620991	0.00515151	18	9	0.156984	4.99642	4.9766	4.95235	5.30744	5.38086	5.12704	5.17599	5.16396	4.93151	5.05334	5.0952
CG33098	0.0620991	0.00515151	18	9	0.156735	5.01714	4.83698	4.88767	5.22083	5.19865	5.21611	5.15985	5.10759	4.99676	5.0237	5.15504
emp	0.0620991	0.00515151	18	12	0.156663	7.7508	7.82192	7.64488	8.09711	7.91339	8.12016	8.06244	7.97831	7.41196	7.72873	7.45118
CG8965	0.0620991	0.00515151	18	9	0.154918	2.08767	2.18836	2.02848	2.40614	2.35136	2.28351	2.3858	2.2922	2.16779	2.21069	2.14393
L	0.0620991	0.00515151	24	21	0.154601	4.74159	4.68063	4.70167	4.61207	4.61497	4.62082	4.61303	4.51481	4.86173	5.07202	4.96994
santa-maria	0.0620991	0.00515151	18	9	0.154569	5.0212	5.06126	5.0396	5.30153	5.29941	5.2603	5.18529	5.23154	4.98814	5.15043	5.15177
CG8300	0.0620991	0.00515151	18	9	0.154351	3.80177	3.76078	3.83856	4.04202	4.1567	4.05388	3.99697	3.93632	3.9365	3.93483	3.94151
CG6153	0.0620991	0.00515151	18	6	0.154261	3.53041	3.67453	3.67253	3.98413	3.95874	3.66919	3.62638	3.54784	3.73035	3.77916	3.84686
CG6041	0.0620991	0.00515151	18	9	0.154059	3.16572	3.09321	3.11655	3.46682	3.45894	3.23856	3.34987	3.24521	3.3221	3.16074	3.22215
unpg	0.0620991	0.00515151	18	9	0.15376	2.917	2.80456	2.87446	3.06953	3.28765	2.93871	3.12617	3.09919	2.91907	2.9252	2.96399
Tcp-1zeta	0.0620991	0.00515151	18	9	0.153508	5.27981	5.2611	5.2954	5.47911	5.56256	5.4544	5.53193	5.4897	5.41924	5.47289	5.45387
Magi	0.0620991	0.00515151	24	0	0.153505	2.99453	3.00675	2.91724	2.7837	2.63027	2.65456	2.60363	2.5722	2.72946	2.82606	2.70888
Rab9	0.0620991	0.00515151	24	12	0.152653	4.72902	4.77959	4.79479	4.95141	4.99568	4.97532	5.08497	5.01047	4.7388	4.84489	4.80189
CG10512	0.0620991	0.00515151	18	6	0.152452	4.80453	4.76169	4.78706	4.8503	5.05016	4.54339	4.50771	4.59897	4.85137	4.95408	5.00245
CG17681	0.0620991	0.00515151	18	9	0.151037	1.46878	1.32398	1.42603	1.74814	1.70301	1.61662	1.59048	1.60692	1.64265	1.51733	1.57562
mib1	0.0620991	0.00515151	24	18	0.150233	4.24259	4.21678	4.19023	4.24732	4.13644	4.34935	4.40224	4.30501	4.43425	4.51692	4.49269
CG4365	0.0620991	0.00515151	18	9	0.149506	5.03546	5.12532	5.11244	5.33825	5.44482	5.25649	5.23479	5.24409	5.18048	5.25503	5.24081
CG8360	0.0620991	0.00515151	18	9	0.148814	5.78536	5.73107	5.77559	5.94405	6.12965	5.91058	5.91925	6.00746	5.82561	5.93168	5.90863
CG14662	0.0620991	0.00515151	18	9	0.148475	1.71418	1.60231	1.70721	2.0149	2.08315	1.77053	1.7289	1.82907	1.75924	1.79927	1.7272
nau	0.0620991	0.00515151	18	9	0.148098	3.53209	3.60114	3.54857	3.82891	3.81767	3.73706	3.76712	3.61093	3.71485	3.65476	3.69356
BBS8	0.0620991	0.00515151	24	9	0.146063	1.53034	1.55146	1.33442	1.68495	1.66604	1.62713	1.57877	1.5487	1.24834	1.53328	1.31193
CCS	0.0620991	0.00515151	18	9	0.143356	3.9669	4.02619	4.02645	4.32521	4.40217	4.20489	4.0579	4.12384	4.14346	4.05198	4.10351
CG43658	0.0620991	0.00515151	24	21	0.143117	3.65426	3.62704	3.60656	3.4765	3.13418	3.4355	3.55192	3.40309	3.67505	3.68051	3.65
Proc-R	0.0620991	0.00515151	24	15	0.142935	3.81965	3.88587	3.83542	4.01163	3.89792	4.24719	4.12892	4.06435	4.08586	4.00311	4.06972
Cyp4ae1	0.0620991	0.00515151	24	21	0.142347	3.34981	3.24835	3.19187	3.10667	3.14022	3.1674	3.15507	3.07074	3.32108	3.45653	3.41025
S6k	0.0620991	0.00515151	24	21	0.141876	4.63944	4.61042	4.63704	4.60049	4.4114	4.53874	4.49226	4.51032	4.7792	4.75997	4.83501
MED26	0.0620991	0.00515151	24	21	0.1416	4.68849	4.63395	4.59943	4.59409	4.34402	4.56436	4.43478	4.52115	4.7657	4.71818	4.8602
CR43461	0.0620991	0.00515151	24	12	0.141462	2.09705	2.24908	2.18702	2.27718	2.39045	2.50593	2.45816	2.5311	2.26147	2.41664	2.24192
VGlut	0.0620991	0.00515151	24	21	0.14023	4.39039	4.31502	4.38025	4.17185	3.76431	4.2473	4.1641	4.24567	4.54432	4.35151	4.4308
fidipidine	0.0620991	0.00515151	18	6	0.140048	3.50623	3.43853	3.62312	3.67799	3.74556	3.47686	3.38982	3.38724	3.56592	3.58657	3.66043
CG10936	0.0620991	0.00515151	24	12	0.139301	2.23898	2.3166	2.33098	2.56957	2.39284	2.69169	2.60551	2.4968	2.35999	2.49528	2.40792
CG42700	0.0620991	0.00515151	24	18	0.139087	3.87559	3.88548	3.85684	3.88194	3.62553	3.98219	4.08077	3.98343	4.09419	4.05069	4.09646
CG1307	0.0620991	0.00515151	18	9	0.138593	5.23132	5.12274	5.17631	5.35517	5.60579	5.28555	5.42131	5.3361	5.28232	5.32124	5.29392
CG11319	0.0620991	0.00515151	24	21	0.138065	3.60334	3.51	3.64908	3.39024	2.81202	3.48958	3.41176	3.49009	3.74733	3.63441	3.57962
Cyp6u1	0.0620991	0.00515151	18	9	0.138003	3.67979	3.72474	3.66213	3.91619	3.99324	3.87614	3.823	3.91562	3.7203	3.86981	3.84648
CG6126	0.0620991	0.00515151	18	9	0.137498	5.28223	5.26437	5.29342	5.58762	5.4676	5.40489	5.38012	5.60953	5.34729	5.38957	5.32634
rols	0.0620991	0.00515151	24	12	0.13731	2.71525	2.7746	2.75998	2.90009	2.78671	3.08894	3.0907	3.02679	2.77106	2.8706	2.85861
CG2681	0.0620991	0.00515151	18	12	0.13686	3.11386	2.9518	3.16103	3.04149	3.14646	3.2201	3.27909	3.46837	2.78286	2.94402	2.65179
dp	0.0620991	0.00515151	24	21	0.136306	2.44116	2.33835	2.41781	2.33083	1.76733	2.25432	2.31933	2.24088	2.52276	2.58463	2.44792
jp	0.0620991	0.00515151	18	0	0.135613	6.47759	6.42714	6.41784	6.28375	6.02776	6.31152	6.29545	6.22047	6.35556	6.33831	6.29349
Gyk	0.0620991	0.00515151	24	21	0.135425	6.29266	6.18533	6.22141	5.99172	6.07259	6.11778	6.07634	6.04042	6.25763	6.29487	6.29155
CG9634	0.0620991	0.00515151	24	18	0.134997	4.167	4.14707	4.15678	4.17117	4.11026	4.31324	4.28749	4.34646	4.35897	4.39203	4.34962
CG13795	0.0620991	0.00515151	18	12	0.133294	4.69207	4.69195	4.45049	4.72676	4.88063	4.78618	4.94586	4.93045	4.37875	4.52496	4.67697
CG17816	0.0620991	0.00515151	24	21	0.132623	3.87162	3.75623	3.84185	3.69156	3.40165	3.72266	3.57333	3.74077	3.92836	3.79583	3.8929
Sk1	0.0620991	0.00515151	24	15	0.132305	3.35436	3.3296	3.23228	3.3824	3.40376	3.53609	3.59891	3.54326	3.40386	3.71435	3.4515
O-fut1	0.0620991	0.00515151	18	9	0.131792	2.83039	2.80726	2.90893	3.10736	3.14456	3.00462	2.91268	2.99431	2.93111	2.93058	2.97428
CG31760	0.0620991	0.00515151	24	21	0.131697	3.32006	3.25684	3.33598	3.12091	2.89597	3.19867	3.07114	3.25157	3.43421	3.28021	3.3673
Dlc90F	0.0620991	0.00515151	18	9	0.131658	5.52368	5.50014	5.50752	5.71422	5.86646	5.61453	5.59815	5.68937	5.59475	5.63123	5.6125
CG13144	0.0620991	0.00515151	24	6	0.131247	4.5315	4.42387	4.58193	4.44533	4.54275	4.3554	4.40514	4.33115	4.32358	4.14879	4.27617
LamC	0.0620991	0.00515151	24	9	0.129655	4.75988	4.78661	4.79373	4.9607	5.11006	4.76605	4.88447	4.83069	4.56438	4.76189	4.61561
CG6659	0.0620991	0.00515151	18	9	0.12884	3.69309	3.77026	3.7481	3.94806	3.92979	3.882	3.94646	3.97045	3.87365	3.8593	3.8329
CG31547	0.0620991	0.00515151	18	9	0.128667	3.3175	3.38175	3.27558	3.58975	3.54647	3.48407	3.48286	3.51383	3.48075	3.52314	3.46631
Dim1	0.0620991	0.00515151	18	6	0.128361	4.23444	4.22125	4.14286	4.46599	4.42856	4.077	4.14261	4.18506	4.20227	4.37087	4.27088
Ca-beta	0.0620991	0.00515151	24	21	0.127976	4.24247	4.19712	4.19543	4.10241	3.5221	4.13907	4.05787	4.06187	4.36352	4.21738	4.32045
NKAIN	0.0620991	0.00515151	24	18	0.127276	4.78229	4.78194	4.78309	4.88677	4.66582	4.91713	4.95029	4.89551	4.98215	4.99054	5.02051
CG13252	0.0620991	0.00515151	24	18	0.127085	4.21234	4.16362	4.10354	4.22699	4.07855	4.33898	4.26459	4.23569	4.39343	4.38885	4.42038
Cyp312a1	0.0620991	0.00515151	24	3	0.125783	1.56008	1.46376	1.56904	1.4765	1.41405	1.30637	1.27852	1.2363	1.29694	1.39075	1.42455
CG32280	0.0620991	0.00515151	18	9	0.125636	5.4931	5.51887	5.43651	5.70354	5.80122	5.66379	5.62832	5.54736	5.50165	5.57053	5.54904
CG1041	0.0620991	0.00515151	24	12	0.125539	4.6816	4.80928	4.73852	4.90944	4.9647	4.99775	4.98233	4.97503	4.74778	4.93997	4.91671
CG12814	0.0620991	0.00515151	24	15	0.125298	4.95073	4.86117	4.88171	4.95143	4.83725	5.21954	5.19376	5.092	5.00306	4.9721	5.01184
CG30421	0.0620991	0.00515151	18	0	0.125191	4.43251	4.42328	4.38865	4.29934	3.99974	4.27368	4.26626	4.19159	4.36618	4.36215	4.34764
Nup358	0.0620991	0.00515151	24	21	0.124035	4.71191	4.71594	4.64331	4.52017	4.21647	4.58458	4.62161	4.4728	4.75556	4.7192	4.68759
Pmp70	0.0620991	0.00515151	24	15	0.123454	5.82687	5.88309	5.86129	6.03003	5.90937	6.06282	6.14379	6.03423	6.03752	6.13132	6.0317
Pgi	0.0620991	0.00515151	24	6	0.122553	8.76813	8.81089	8.79768	8.76734	8.8723	8.74832	8.73756	8.73895	8.50864	8.39604	8.42174
Galpha49B	0.0620991	0.00515151	24	21	0.122167	4.47885	4.4134	4.40098	4.3534	4.10539	4.3593	4.18949	4.25739	4.51007	4.43517	4.48992
CG4942	0.0620991	0.00515151	24	0	0.120784	3.33265	3.41105	3.41712	3.19255	3.31327	3.16531	3.10759	3.15794	3.29197	3.19909	3.36452
CG8389	0.0620991	0.00515151	18	3	0.120772	3.85769	3.65179	3.81113	3.49932	3.70955	3.47672	3.55903	3.57178	4.03085	4.12986	4.09094
CG9911	0.0620991	0.00515151	18	9	0.120088	5.37719	5.42722	5.38507	5.62927	5.70294	5.54472	5.52519	5.50933	5.4875	5.47764	5.56374
Clc	0.0620991	0.00515151	18	9	0.119895	6.40666	6.39903	6.36591	6.61885	6.66031	6.53258	6.53835	6.48886	6.46211	6.572	6.45839
CG1542	0.0620991	0.00515151	18	6	0.119003	3.59364	3.47085	3.57324	3.60446	3.81965	3.42145	3.3419	3.43346	3.64992	3.6832	3.79359
CG9630	0.0620991	0.00515151	18	6	0.118469	2.85054	2.93567	2.94461	3.01705	3.10425	2.84431	2.7593	2.74854	2.90926	3.07358	3.00799
CG12344	0.0620991	0.00515151	18	12	0.11736	3.23656	3.35239	3.22716	3.42252	3.3622	3.56635	3.49537	3.39914	3.03556	3.30776	3.13271
CG12140	0.0620991	0.00515151	24	21	0.116897	6.59573	6.62886	6.58445	6.41564	6.47527	6.41752	6.52326	6.43975	6.6308	6.69249	6.61639
CG3847	0.0620991	0.00515151	24	12	0.116893	4.02949	4.07202	4.04134	4.20637	4.14858	4.27587	4.23761	4.25896	4.01016	4.12658	4.09911
CG9894	0.0620991	0.00515151	24	15	0.116872	7.69363	7.69103	7.45901	7.69819	7.76887	7.86561	7.90094	7.85826	7.73686	7.76933	7.87038
Ephrin	0.0620991	0.00515151	24	21	0.116456	4.03152	3.97098	4.02654	3.96474	3.4979	3.93539	3.86344	3.91955	4.10986	4.06239	4.19704
Tpi	0.0620991	0.00515151	24	9	0.115812	8.13344	8.11926	8.12949	8.19891	8.386	8.11846	8.18781	8.17817	7.97233	7.95488	7.89305
flfl	0.0620991	0.00515151	24	21	0.115217	4.7126	4.66243	4.69089	4.63951	4.19736	4.60351	4.59143	4.53296	4.76049	4.79371	4.80656
CaBP1	0.0620991	0.00515151	18	9	0.11496	4.83054	4.74531	4.73429	4.98791	5.11435	4.85913	4.86601	4.93352	4.79136	4.78632	4.82953
FR	0.0620991	0.00515151	24	21	0.113138	3.00536	2.95371	2.94923	2.90325	2.68078	2.95205	2.89001	2.8325	3.05782	3.0585	3.11809
bur	0.0620991	0.00515151	24	21	0.112391	5.37417	5.3561	5.34569	5.29238	5.14664	5.2565	5.224	5.22811	5.40125	5.4255	5.53728
Nmdar2	0.0620991	0.00515151	18	0	0.112092	2.3621	2.32212	2.44343	2.19753	1.6986	2.22318	2.30527	2.18359	2.3566	2.26383	2.30925
ade2	0.0620991	0.00515151	24	15	0.111531	4.64492	4.60071	4.57466	4.63094	4.57845	4.80573	4.89731	4.75726	4.70133	4.72712	4.74624
Jwa	0.0620991	0.00515151	18	9	0.110944	6.41968	6.43371	6.39837	6.58119	6.8367	6.55522	6.52137	6.57663	6.49996	6.52634	6.56953
Buffy	0.0620991	0.00515151	18	12	0.110873	4.10156	4.1831	4.15939	4.16761	4.34588	4.32283	4.31336	4.40926	3.96775	3.8348	3.90742
43712	0.0620991	0.00515151	24	15	0.110611	3.7918	3.84006	3.80459	3.85872	3.78538	3.98816	4.00255	4.01658	3.9574	3.91709	3.94904
Rtnl1	0.0620991	0.00515151	24	9	0.11013	6.67901	6.69086	6.69901	6.80738	6.90036	6.81895	6.68723	6.78998	6.63463	6.57064	6.6309
CG17209	0.0620991	0.00515151	24	21	0.109259	2.59013	2.59022	2.59418	2.56455	2.47227	2.54998	2.52754	2.54594	2.74766	2.74671	2.77734
crp	0.0620991	0.00515151	24	21	0.109061	4.5851	4.60473	4.591	4.53974	4.17515	4.46362	4.45265	4.41901	4.63799	4.60596	4.6186
Hydr2	0.0620991	0.00515151	24	15	0.108122	4.33363	4.45181	4.3891	4.55108	4.50623	4.62621	4.60644	4.6246	4.5941	4.59212	4.66658
CG42629	0.0620991	0.00515151	18	0	0.107698	1.66769	1.57077	1.66728	1.47123	1.28879	1.48683	1.56723	1.51517	1.64276	1.5542	1.58626
CG9302	0.0620991	0.00515151	18	9	0.107068	2.97451	3.05386	2.992	3.18671	3.20543	3.15044	3.15106	3.11709	3.07993	3.10453	3.15279
CG16947	0.0620991	0.00515151	24	15	0.107028	3.3762	3.4712	3.36812	3.47685	3.42443	3.68812	3.68308	3.66331	3.45096	3.48587	3.51118
nonA	0.0620991	0.00515151	24	21	0.106895	4.1049	4.05933	4.06213	4.01772	3.86435	4.00974	3.91534	3.99716	4.17328	4.18519	4.13357
Sply	0.0620991	0.00515151	24	12	0.106554	4.49547	4.55763	4.6495	4.76685	4.74746	4.76009	4.76656	4.85164	4.60804	4.68168	4.69468
beta4GalT7	0.0620991	0.00515151	18	6	0.10622	2.8589	2.91704	2.87161	3.18813	3.23433	2.87934	2.76682	2.84657	3.01221	3.1566	3.21576
Coop	0.0620991	0.00515151	24	9	0.106078	2.53282	2.59194	2.53874	2.68135	2.79589	2.64534	2.73191	2.65784	2.52365	2.58467	2.42837
CG15211	0.0620991	0.00515151	24	9	0.105627	4.5621	4.57238	4.45851	4.66502	4.78344	4.65375	4.57292	4.55036	4.41543	4.44982	4.4699
Surf4	0.0620991	0.00515151	18	9	0.105335	5.8071	5.85684	5.83996	6.02941	6.11669	5.96532	5.89391	5.94679	5.92874	5.91186	5.91325
CG8159	0.0620991	0.00515151	18	6	0.105155	2.42254	2.43028	2.39896	2.57896	2.57909	2.2917	2.33282	2.47374	2.47869	2.56606	2.48295
CG9253	0.0620991	0.00515151	18	6	0.104002	4.57285	4.59388	4.55276	4.65505	4.76969	4.42686	4.39179	4.51199	4.76798	4.80247	4.60908
CG7744	0.0620991	0.00515151	24	0	0.103827	2.54768	2.56828	2.53305	2.47572	2.40196	2.31162	2.38546	2.39845	2.53499	2.50712	2.5486
CG6404	0.0620991	0.00515151	18	3	0.103524	3.94171	3.8726	4.02516	3.80872	3.89537	3.75512	3.7743	3.72952	3.97218	3.97734	4.08478
Glt	0.0620991	0.00515151	18	15	0.10207	7.4226	7.37828	7.28968	7.16646	7.12701	7.39443	7.43283	7.38181	7.17403	7.36084	7.27948
CG1665	0.0620991	0.00515151	18	9	0.101936	3.8621	4.05153	3.90829	4.15395	4.17869	4.13494	4.1133	4.17382	4.04478	4.04026	4.0616
cl	0.0620991	0.00515151	18	9	0.101727	6.47924	6.4855	6.41066	6.6278	6.85671	6.53668	6.62135	6.59837	6.42656	6.57593	6.49865
PH4alphaMP	0.0620991	0.00515151	24	15	0.101242	1.37159	1.38117	1.33344	1.36282	1.39451	1.55251	1.50698	1.59006	1.44303	1.51247	1.50127
GstE3	0.0620991	0.00515151	18	12	0.101146	6.39151	6.42536	6.21471	6.49424	6.5751	6.62091	6.67891	6.41083	5.6368	6.09506	5.69691
CG8128	0.0620991	0.00515151	24	18	0.100688	6.04593	6.00561	6.08147	5.91201	6.09389	6.10268	6.17896	6.12469	6.22982	6.22456	6.24395
CG6785	0.0620991	0.00515151	24	9	0.100575	1.81395	1.78814	1.81523	2.04487	1.9595	1.87726	1.93579	1.87396	1.73834	1.69193	1.84973
Ote	0.0620991	0.00515151	18	6	0.100055	1.66954	1.55154	1.69304	1.83224	1.8878	1.5824	1.66399	1.66568	1.70421	1.7436	1.75765
CG12050	0.0620991	0.00515151	18	3	0.0989932	3.02131	2.98589	3.09176	3.11343	2.90513	2.89308	2.8979	2.89153	3.11806	3.16481	3.20988
CG9186	0.0620991	0.00515151	18	9	0.0986257	3.94143	4.0095	3.88572	4.11072	4.2056	4.02751	4.06868	4.0806	4.01932	4.02306	4.08537
Chi	0.0620991	0.00515151	18	9	0.0985205	3.83212	3.81861	3.74995	3.95926	3.99893	3.87875	3.97013	3.94687	3.83082	3.94535	3.87539
Use1	0.0620991	0.00515151	18	6	0.0981491	3.29108	3.27491	3.27645	3.37885	3.486	3.23551	3.11622	3.20893	3.27678	3.40472	3.42141
CG14855	0.0620991	0.00515151	24	15	0.0977451	1.57073	1.66494	1.72725	1.77401	1.76722	2.06756	1.86517	1.87634	1.83047	1.69131	1.82633
Acox57D-p	0.0620991	0.00515151	24	18	0.0975829	4.29156	4.24446	4.19116	4.14714	4.1169	4.32011	4.32628	4.27278	4.31445	4.44168	4.38241
puc	0.0620991	0.00515151	24	15	0.0975461	4.40042	4.3677	4.39518	4.58737	4.4662	4.61847	4.59253	4.5879	4.55175	4.50142	4.5426
Doc1	0.0620991	0.00515151	18	12	0.0973866	1.34545	1.34664	1.33682	1.36046	1.55343	1.38973	1.49789	1.5019	1.31308	1.29778	1.30509
CG42450	0.0620991	0.00515151	24	21	0.0972502	3.33612	3.29777	3.35133	3.10107	2.73328	3.24543	3.20469	3.27797	3.51948	3.30453	3.34297
RluA-1	0.0620991	0.00515151	24	15	0.0964845	4.80685	4.76777	4.71966	4.85997	4.72908	5.0443	4.9429	4.92458	4.88364	4.89184	4.85229
IntS11	0.0620991	0.00515151	18	9	0.0960541	4.16888	4.11341	4.11058	4.26624	4.37587	4.25606	4.19863	4.24784	4.18328	4.20679	4.2483
Act5C	0.0620991	0.00515151	24	9	0.0955828	8.40941	8.39894	8.42224	8.65976	8.72306	8.49194	8.46095	8.52387	8.31692	8.37846	8.45232
Hexo1	0.0620991	0.00515151	24	12	0.0946547	6.06435	5.97797	6.09091	6.18694	6.28768	6.21881	6.28751	6.30685	6.19028	6.16505	6.16979
CG6685	0.0620991	0.00515151	18	3	0.0943238	2.67108	2.6419	2.54525	2.6703	2.47243	2.52271	2.46831	2.43734	2.69287	2.71325	2.88107
Eip75B	0.0620991	0.00515151	18	0	0.0942457	3.80639	3.71104	3.6944	3.55984	3.2077	3.59108	3.68569	3.58159	3.61653	3.67199	3.60069
CG10625	0.0620991	0.00515151	18	6	0.0941364	1.44988	1.42987	1.53497	1.62918	1.54414	1.39887	1.33	1.38376	1.47995	1.52378	1.51026
CG13937	0.0620991	0.00515151	24	15	0.0938454	5.13033	5.13067	5.0479	5.15914	5.25906	5.3701	5.29775	5.31843	5.20465	5.18614	5.24727
CG31627	0.0620991	0.00515151	18	6	0.0934643	1.9415	1.85817	2.03147	2.05413	2.1832	1.94184	1.84687	1.84666	2.03738	1.98419	2.03948
CG1136	0.0620991	0.00515151	18	12	0.0932041	3.63669	3.63128	3.63864	3.89308	3.67364	3.79506	3.82126	3.69158	3.5944	3.58973	3.62217
CG18549	0.0620991	0.00515151	18	15	0.0925965	4.70229	4.77533	4.7553	4.66892	4.58093	4.84018	4.92511	4.81361	4.65325	4.63093	4.65835
Nmdar1	0.0620991	0.00515151	24	21	0.0925958	3.05836	3.11433	3.16735	3.00282	2.79796	3.10154	3.01502	3.10156	3.29479	3.14596	3.2086
CG13183	0.0620991	0.00515151	24	9	0.0919674	1.47934	1.44549	1.52317	1.61376	1.55252	1.5268	1.38518	1.54478	1.31414	1.27997	1.37321
n-syb	0.0620991	0.00515151	24	21	0.0907785	6.17687	6.12806	6.17594	6.03679	5.90611	6.11649	6.0306	6.12047	6.32702	6.14927	6.21721
bin3	0.0620991	0.00515151	24	21	0.0902074	4.16724	4.20725	4.1706	4.13842	3.76061	4.08959	4.11223	4.11505	4.28593	4.27171	4.25253
XRCC1	0.0620991	0.00515151	18	6	0.0895547	3.3573	3.30404	3.35605	3.48255	3.63672	3.33891	3.33266	3.21305	3.39749	3.36586	3.53257
fra	0.0620991	0.00515151	24	18	0.0893224	2.2897	2.27711	2.32964	2.31673	1.98533	2.39116	2.354	2.40426	2.5121	2.4698	2.4026
bel	0.0620991	0.00515151	24	18	0.0889922	5.65905	5.68177	5.63689	5.59603	5.35463	5.74451	5.80413	5.70051	5.73262	5.80666	5.75184
su(s)	0.0620991	0.00515151	18	3	0.0888745	3.98149	3.95772	3.96181	3.91167	3.79053	3.84341	3.81999	3.7787	3.99252	4.06221	3.97322
Eip63F-1	0.0620991	0.00515151	24	9	0.0873252	5.70392	5.77346	5.68008	5.87924	5.88088	5.79907	5.72689	5.7311	5.64398	5.47984	5.68327
Glu-RIB	0.0620991	0.00515151	24	21	0.0871668	1.85362	1.84265	1.88719	1.78181	1.53441	1.72777	1.75737	1.81333	1.93962	1.87547	1.894
CG8301	0.0620991	0.00515151	24	15	0.0868921	2.47258	2.47778	2.53797	2.54309	2.50007	2.60462	2.6854	2.61898	2.60133	2.66531	2.55399
CG18547	0.0620991	0.00515151	18	12	0.0864668	5.84407	5.74283	5.9226	5.88907	6.0309	5.95365	6.02863	6.05758	5.24873	5.46502	5.32911
deltaCOP	0.0620991	0.00515151	18	9	0.0861028	5.35984	5.43334	5.37406	5.57896	5.5329	5.47261	5.49379	5.49881	5.37439	5.48203	5.39624
CG11873	0.0620991	0.00515151	24	21	0.0859517	3.20351	3.13793	3.18568	3.11851	2.59594	3.10905	3.17683	3.07304	3.27436	3.33234	3.20605
CG7837	0.0620991	0.00515151	18	6	0.085171	2.64321	2.56842	2.67582	2.7169	2.69834	2.50997	2.55749	2.53587	2.67698	2.74096	2.70179
eIF-2alpha	0.0620991	0.00515151	18	9	0.0851664	5.98479	5.98168	5.9662	6.1418	6.3335	5.99602	6.04948	6.08195	5.98951	6.06648	6.03357
eIF-4E	0.0620991	0.00515151	18	9	0.08502	6.2045	6.17778	6.1865	6.34308	6.39233	6.30406	6.22354	6.28579	6.2415	6.23277	6.24158
CG14476	0.0620991	0.00515151	18	9	0.0846193	6.35414	6.34188	6.29464	6.47412	6.42258	6.46817	6.47035	6.42135	6.35363	6.40084	6.36291
CG7879	0.0620991	0.00515151	18	6	0.0842839	3.25564	3.25578	3.22566	3.44284	3.28244	3.15753	3.13109	3.10083	3.27892	3.22603	3.3496
Rbcn-3B	0.0620991	0.00515151	24	21	0.0838954	4.87512	4.88438	4.89595	4.80615	4.19566	4.76878	4.84487	4.71469	4.91534	4.92509	4.88713
CG11975	0.0620991	0.00515151	18	9	0.0837031	4.46458	4.47138	4.54874	4.65141	4.63849	4.61589	4.62869	4.56656	4.55019	4.57901	4.62265
mnd	0.0620991	0.00515151	24	0	0.083541	3.75373	3.82435	3.81523	3.72963	3.70542	3.56032	3.44657	3.69719	3.77376	3.70667	3.80558
CG30392	0.0620991	0.00515151	18	6	0.0833103	4.24468	4.22417	4.31294	4.38959	4.45214	4.23729	4.19883	4.20453	4.38738	4.33271	4.51784
CG2889	0.0620991	0.00515151	18	9	0.0832867	3.35581	3.38943	3.36862	3.52646	3.60177	3.39548	3.47371	3.4496	3.44906	3.42754	3.43736
nclb	0.0620991	0.00515151	18	6	0.0832487	3.92404	3.90503	3.90015	4.13933	4.19822	3.89895	3.80966	3.91545	4.09369	4.18731	4.081
ftz-f1	0.0620991	0.00515151	24	21	0.0830446	3.46136	3.43099	3.43216	3.34856	3.00523	3.35737	3.32686	3.34512	3.4607	3.46687	3.5267
trbl	0.0620991	0.00515151	18	12	0.0828307	3.93685	3.83982	3.8912	3.89508	4.00033	4.05503	4.0259	3.99224	3.74794	3.84346	3.76711
APP-BP1	0.0620991	0.00515151	18	6	0.0828031	3.3935	3.40335	3.37153	3.48257	3.53599	3.3621	3.25308	3.2979	3.49164	3.4556	3.67883
CG31150	0.0620991	0.00515151	18	15	0.0827888	4.77209	4.68882	4.7094	4.67447	4.48158	4.81123	4.80782	4.81443	4.54725	4.64326	4.54724
Rm62	0.0620991	0.00515151	24	12	0.082481	6.96458	6.9776	6.8959	7.09939	7.01177	7.10778	7.16402	7.11277	7.0234	7.06206	7.02908
smi35A	0.0620991	0.00515151	18	0	0.0823129	3.90929	3.90317	3.96195	3.82187	3.49743	3.88645	3.77004	3.82739	3.88014	3.83953	3.89995
GABA-B-R3	0.0620991	0.00515151	18	0	0.081828	1.93313	1.94327	1.9531	1.81648	1.69336	1.84248	1.87666	1.82927	2.01792	1.92763	1.88488
brat	0.0620991	0.00515151	18	0	0.0814691	2.1181	2.0963	2.16218	2.0531	1.83522	2.04434	1.98166	2.03644	2.09034	2.06007	2.07846
CG34114	0.0620991	0.00515151	24	21	0.0812498	2.43061	2.40612	2.47436	2.34916	1.9748	2.40602	2.32114	2.47436	2.57204	2.50234	2.48128
CG1416	0.0620991	0.00515151	24	12	0.0808842	5.26225	5.34398	5.36743	5.48016	5.49652	5.54774	5.50337	5.45092	5.4128	5.40906	5.47412
CG7536	0.0620991	0.00515151	24	21	0.0803411	3.95321	4.00617	3.99554	3.94252	3.77583	3.95891	3.88065	3.93298	4.0222	4.07125	4.08637
CG4950	0.0620991	0.00515151	18	12	0.0795191	4.48796	4.57531	4.59081	4.77236	4.65902	4.81662	4.58689	4.785	4.28736	4.26089	4.02724
Patr-1	0.0620991	0.00515151	24	21	0.0783496	3.4307	3.43074	3.45953	3.38627	3.06094	3.38338	3.36615	3.29735	3.49122	3.47992	3.48185
CG5270	0.0620991	0.00515151	24	21	0.0782467	3.20115	3.19991	3.21761	3.19583	2.84508	3.11726	3.16435	3.04385	3.25404	3.30557	3.22883
CG6184	0.0620991	0.00515151	24	18	0.0773925	2.84215	2.85255	2.82464	2.79469	2.79177	2.84345	2.99092	2.8905	3.0151	2.97179	2.89142
CG6700	0.0620991	0.00515151	24	21	0.0771001	4.9453	4.91412	4.94607	4.90448	4.42789	4.84606	4.88944	4.87686	5.01071	4.99888	5.02627
CG1908	0.0620991	0.00515151	24	9	0.0766267	4.35879	4.31855	4.29799	4.44579	4.49544	4.37421	4.3804	4.33368	4.21233	4.25799	4.32531
Sik2	0.0620991	0.00515151	24	18	0.0764704	3.12594	3.15368	3.1455	3.07862	2.8636	3.10537	3.21571	3.20902	3.2582	3.30573	3.21803
CG14223	0.0620991	0.00515151	18	12	0.0762134	1.83282	1.90921	1.86557	1.93937	2.04411	2.08629	2.08701	1.92744	1.72117	1.8398	1.79083
l(1)G0193	0.0620991	0.00515151	18	9	0.0758432	4.64129	4.73821	4.73871	4.85268	4.79576	4.8729	4.7934	4.81903	4.74612	4.77612	4.76718
beta'Cop	0.0620991	0.00515151	18	9	0.0754416	4.77046	4.82546	4.81812	4.96501	4.9654	4.87572	4.87858	4.91286	4.82386	4.90665	4.86484
Mcm2	0.0620991	0.00515151	24	6	0.0752982	1.61703	1.58098	1.55389	1.71575	1.68272	1.54791	1.49859	1.56402	1.44867	1.51248	1.54361
epsilonCOP	0.0620991	0.00515151	18	9	0.0751757	5.03481	4.98003	5.09613	5.18217	5.3503	5.10278	5.10566	5.12186	5.04813	5.07877	5.05812
CG2926	0.0620991	0.00515151	24	21	0.0746996	4.00651	4.00008	4.00687	3.99255	3.52733	3.93481	4.00414	3.92276	4.11764	4.10716	4.04454
CG8563	0.0620991	0.00515151	18	3	0.074628	1.48272	1.48179	1.65698	1.45047	1.45245	1.40022	1.36592	1.34592	1.61978	1.59338	1.62154
enc	0.0620991	0.00515151	24	21	0.0737922	4.29126	4.29207	4.27086	4.25228	3.78917	4.24411	4.28285	4.16331	4.37318	4.36172	4.34101
CG5033	0.0620991	0.00515151	18	6	0.0737866	3.31341	3.30301	3.2885	3.38114	3.43588	3.23766	3.17524	3.28291	3.39394	3.41576	3.40422
pcm	0.0620991	0.00515151	24	21	0.0736936	3.12443	3.15789	3.13989	3.10759	2.99624	3.04505	3.13099	3.06562	3.18054	3.25893	3.20788
CG4662	0.0620991	0.00515151	24	18	0.0726259	4.61393	4.67037	4.63024	4.61782	4.59514	4.75014	4.67434	4.64077	4.76586	4.71513	4.81021
gw	0.0620991	0.00515151	24	21	0.0721516	6.32343	6.30837	6.29279	6.27966	5.89989	6.27604	6.24573	6.20897	6.38221	6.34556	6.43894
Pitslre	0.0620991	0.00515151	24	18	0.0713699	5.71314	5.73306	5.6866	5.67751	5.65246	5.72687	5.75005	5.69542	5.86855	5.8366	5.88157
CG6000	0.0620991	0.00515151	24	6	0.0705109	5.44695	5.4259	5.41812	5.45176	5.7592	5.41721	5.28754	5.38173	5.3442	5.29959	5.35507
Gale	0.0620991	0.00515151	24	3	0.0703677	6.9937	6.95535	7.00606	6.86949	6.88205	6.76947	6.82428	6.85634	6.83181	6.88505	6.85835
Jra	0.0620991	0.00515151	24	12	0.0699709	4.93767	4.92107	4.86665	5.03005	5.00181	5.08001	5.21054	5.01307	5.01289	4.94499	5.00363
pygo	0.0620991	0.00515151	24	18	0.0693886	3.19996	3.10466	3.12539	3.1172	3.03292	3.2023	3.19271	3.15471	3.22687	3.24471	3.24566
kcc	0.0620991	0.00515151	24	21	0.069155	5.80512	5.76078	5.79922	5.7131	5.588	5.78448	5.64216	5.78143	5.90424	5.82411	5.82166
CG7386	0.0620991	0.00515151	18	6	0.0677589	1.97983	2.04421	1.98776	2.06944	2.15883	1.96704	1.86518	1.95442	1.98873	2.12352	2.14698
Ocrl	0.0620991	0.00515151	24	18	0.067126	4.09327	4.01887	4.02542	4.10149	3.98263	4.1034	4.12284	4.13002	4.14799	4.19443	4.17198
CG13766	0.0620991	0.00515151	18	6	0.066491	3.01417	3.0016	2.95645	3.07889	3.06036	2.874	2.88892	2.93346	3.06529	3.04349	3.1974
CG12863	0.0620991	0.00515151	18	3	0.0664723	2.77645	2.72946	2.80539	2.7193	2.83067	2.59614	2.68965	2.69752	2.84223	2.86898	2.90576
laza	0.0620991	0.00515151	18	3	0.066264	2.5467	2.54867	2.56949	2.58626	2.52398	2.34799	2.32914	2.49556	2.69159	2.81807	2.6423
CG2246	0.0620991	0.00515151	18	6	0.0662446	4.58119	4.62083	4.59034	4.71323	4.79517	4.58403	4.49915	4.61924	4.64215	4.69339	4.68986
CG2811	0.0620991	0.00515151	18	6	0.0656909	4.53312	4.4808	4.50618	4.60164	4.85752	4.46871	4.44919	4.45388	4.85669	4.7387	4.71391
Asx	0.0620991	0.00515151	24	18	0.0651868	3.51529	3.489	3.50611	3.43144	3.08877	3.54619	3.52153	3.46594	3.5935	3.59803	3.61481
HPS4	0.0620991	0.00515151	24	21	0.0644204	4.38466	4.34466	4.29826	4.25532	4.11005	4.31308	4.30114	4.34358	4.46007	4.42639	4.39152
CG11149	0.0620991	0.00515151	18	3	0.0641788	3.5116	3.32793	3.40712	3.31976	3.28064	3.22336	3.19552	3.37412	3.71938	3.81047	3.68735
CG4612	0.0620991	0.00515151	24	21	0.0612224	5.04546	4.9839	4.98618	4.97759	4.7727	5.00036	4.9821	4.93785	5.13456	5.07168	5.05948
CG5861	0.0620991	0.00515151	18	6	0.0609706	4.48366	4.45424	4.49163	4.60256	4.7199	4.41613	4.44509	4.46656	4.51362	4.67605	4.71548
endoA	0.0620991	0.00515151	24	21	0.0608538	5.69781	5.66591	5.69571	5.61854	5.36551	5.6607	5.68104	5.6323	5.86997	5.69484	5.80233
CG5728	0.0620991	0.00515151	18	3	0.0601543	3.13192	3.09388	3.09111	3.18054	3.08188	3.06093	3.00623	3.00862	3.22413	3.3467	3.22503
CG3703	0.0620991	0.00515151	24	12	0.0596146	3.01194	2.98149	2.98363	3.04474	3.07588	3.12207	3.17357	3.14031	3.05571	3.04681	3.06103
CG43861	0.0620991	0.00515151	18	0	0.0584385	2.3826	2.37107	2.31251	2.2516	2.23136	2.24429	2.27242	2.25758	2.30027	2.32204	2.26
mtd	0.0620991	0.00515151	24	21	0.0580361	5.47385	5.43707	5.43217	5.41017	5.11781	5.41924	5.37051	5.3889	5.50054	5.46464	5.5042
CG5466	0.0620991	0.00515151	24	18	0.05558	2.53923	2.51687	2.54869	2.50565	2.53791	2.55121	2.55546	2.62375	2.61122	2.61498	2.70748
SNF4Agamma	0.0620991	0.00515151	24	21	0.0555252	5.20329	5.18913	5.18726	5.13172	4.89678	5.16462	5.1258	5.05045	5.20536	5.20315	5.24992
Khc-73	0.0620991	0.00515151	24	21	0.0549249	4.34688	4.30415	4.31084	4.28947	3.75042	4.28228	4.30443	4.2825	4.3972	4.44102	4.36604
nimB5	0.0620991	0.00515151	18	12	0.0548807	4.16412	4.23123	4.3321	4.26114	4.2527	4.38191	4.27546	4.34317	3.97234	4.10802	4.15932
CG31224	0.0620991	0.00515151	24	21	0.0540148	3.89416	3.86132	3.8429	3.8115	3.41684	3.84041	3.90756	3.83259	3.94927	3.94505	3.9238
amon	0.0620991	0.00515151	24	21	0.0526349	4.43811	4.39064	4.41571	4.22089	4.08383	4.42729	4.37662	4.38948	4.63879	4.45439	4.43668
CG2747	0.0620991	0.00515151	24	21	0.0526326	4.81297	4.76527	4.80508	4.74765	4.34701	4.7977	4.79327	4.79278	4.95164	4.9411	4.84206
CG14230	0.0620991	0.00515151	18	6	0.0503099	2.79368	2.84089	2.81441	2.89076	2.98269	2.75481	2.81381	2.78535	2.825	2.90026	2.84688
psidin	0.0620991	0.00515151	18	3	0.0496053	3.11885	3.09063	3.09942	3.09437	3.01537	3.02988	3.02445	3.00603	3.14417	3.14639	3.22284
CG11030	0.0620991	0.00515151	24	21	0.0479875	3.30193	3.27954	3.28433	3.27625	3.18007	3.26386	3.23822	3.25377	3.35968	3.31038	3.48868
eIF-2gamma	0.0620991	0.00515151	18	6	0.046621	4.97016	4.96761	4.98762	5.17727	5.25482	4.96417	4.94428	5.01021	5.10459	5.05809	5.04669
CG42797	0.0620991	0.00515151	24	18	0.0433182	2.87071	2.84418	2.86366	2.85443	2.68181	2.93744	2.87983	2.87602	2.97363	2.91744	2.88764
RhoGAP16F	0.0620991	0.00515151	18	12	0.0388096	2.8114	2.72019	2.77821	2.89738	2.79027	2.83306	2.84283	2.9244	2.66231	2.65317	2.61098
Rop	0.0620991	0.00515151	24	18	0.0387555	5.85279	5.84043	5.8487	5.85132	5.79368	5.9045	5.8716	5.8777	5.94886	5.92465	5.88991
CG43693	0.0620991	0.00515151	24	15	0.0368495	6.28214	6.28088	6.25396	6.29211	6.26954	6.37246	6.37404	6.30826	6.30197	6.33448	6.2987
Grip71	0.0620991	0.00515151	18	3	0.0289366	1.88858	1.97664	1.86729	1.85736	1.84126	1.81799	1.82905	1.84611	2.02473	1.89473	1.95172
CG13215	0.0883473	0.00848485	24	18	0.088872	1.03099	1.0196	1	1.03915	1	1.08767	1.12036	1.04691	1.16484	1.3961	1.22998
Jhe	0.0883473	0.0118182	24	6	1.82653	3.82542	4.12212	3.82634	3.53937	3.85521	1.48808	1.50769	1.27671	1.15584	1.14751	1.15671
CheA75a	0.0883473	0.0118182	24	9	1.4619	5.8305	6.33918	5.47909	7.82747	8.13993	7.84654	7.72224	7.35073	5.37755	7.07868	5.07064
CheA7a	0.0883473	0.0118182	24	9	1.39358	5.47919	5.98002	5.23944	7.38644	7.63392	7.50774	7.29896	6.97015	5.13554	6.88898	4.67104
CG13428	0.0883473	0.0118182	24	9	1.27309	8.39758	8.59324	8.24828	10.2085	10.3073	10.064	10.0334	9.63726	7.68603	9.69818	7.05753
CG32551	0.0883473	0.0118182	24	9	1.23651	3.88742	4.05029	3.73477	5.63605	5.86758	5.48352	5.54621	5.04539	3.63661	5.09118	3.03611
Obp19b	0.0883473	0.0118182	24	9	1.22149	6.09274	6.15753	5.9919	7.79167	7.98466	7.59569	7.74787	7.24708	5.28171	7.37763	4.65919
CG12158	0.0883473	0.0118182	24	9	1.19613	5.47997	5.54889	5.49012	7.18212	7.29884	7.12002	7.09442	6.73224	4.47537	6.87208	4.1335
CG18540	0.0883473	0.0118182	24	9	1.19159	3.63339	3.95355	3.41001	5.32423	5.61726	5.23339	5.22009	4.8868	3.38684	4.89966	2.85941
CheB38b	0.0883473	0.0118182	24	9	1.17312	4.27834	4.19022	4.34528	5.98649	5.91863	5.77061	5.73282	5.14051	3.27252	5.30923	2.53462
CG43841	0.0883473	0.0118182	24	9	1.15991	4.36879	4.82592	4.37295	6.09132	6.15721	6.08247	5.87788	5.57208	3.82902	5.62101	3.32635
Obp56g	0.0883473	0.0118182	24	9	1.15612	4.38834	4.40978	4.45126	6.00816	6.09511	6.03593	5.8296	5.53105	3.38722	5.22238	3.09235
CheB53a	0.0883473	0.0118182	24	9	1.12563	2.33615	2.3486	2.50461	4.05749	3.80675	3.56002	3.83772	3.23794	1.37806	2.53551	1.34501
dro5	0.0883473	0.0118182	24	9	1.11134	7.32533	7.75136	7.25982	8.97567	9.34173	8.90095	8.82761	8.75418	7.27984	8.11322	7.1903
CG14502	0.0883473	0.0118182	24	9	0.996294	3.11739	3.16882	3.13682	4.56385	4.58508	4.54394	4.31672	4.1694	2.85989	4.22053	2.55637
CG18536	0.0883473	0.0118182	24	9	0.971102	3.18618	3.42953	2.91034	4.58788	4.7041	4.50253	4.34068	4.00589	2.76482	4.06094	2.49027
CG15369	0.0883473	0.0118182	24	21	0.966077	5.95415	6.11917	5.22494	4.47731	4.32757	5.97117	5.85983	5.87228	7.28152	7.01742	7.58899
CG18537	0.0883473	0.0118182	24	9	0.877954	2.73669	3.10047	2.8945	4.18453	4.30355	4.09359	4.06066	3.83651	2.65911	3.90008	2.13733
Hdc	0.0883473	0.0118182	18	9	0.874884	2.18047	2.39708	2.23443	3.63283	3.62872	3.52373	3.51765	3.42928	2.28567	3.02213	1.8381
CheA29a	0.0883473	0.0118182	24	9	0.705112	2.62468	2.55777	2.51331	3.62468	3.60658	3.44149	3.29241	3.21421	1.8213	3.24614	1.59839
Cpr49Ae	0.0883473	0.0118182	24	6	0.645139	6.28913	6.25278	6.42417	6.26737	6.26105	5.7426	5.40941	5.79163	5.30188	5.23547	5.30777
CG14120	0.0883473	0.0118182	24	9	0.629871	1.56639	2.141	1.74147	2.71531	2.94328	2.35404	2.27988	2.76702	1.67509	1.83752	1.37629
CG5867	0.0883473	0.0118182	24	6	0.624003	7.86534	8.06084	7.81706	7.8964	8.17904	7.04906	7.08571	7.14594	6.8924	7.22723	6.96039
CG10175	0.0883473	0.0118182	24	9	0.621004	2.46559	2.74379	2.57068	3.51863	3.45635	3.44995	3.31683	3.05014	2.18894	3.17744	2.17294
CG10237	0.0883473	0.0118182	24	12	0.588272	6.3125	6.43749	5.94361	7.12935	7.06421	7.53001	7.65033	7.24304	6.558	7.61403	6.5046
lox2	0.0883473	0.0118182	24	9	0.579997	2.30923	2.58403	2.2799	3.12688	3.27215	3.26293	3.09655	2.80463	1.93144	2.73948	1.9808
CG15065	0.0883473	0.0118182	18	9	0.56411	6.00289	6.2382	5.99953	6.79224	7.33532	6.95112	7.03128	6.76931	6.63808	6.8593	6.68298
CG8997	0.0883473	0.0118182	24	12	0.556879	4.09977	3.87459	4.15765	4.2013	5.20662	5.00739	5.36935	5.23214	4.45898	4.6229	4.42
fa2h	0.0883473	0.0118182	24	9	0.54538	1.5058	1.67982	1.41171	2.34183	2.41188	2.21223	2.15782	2.28968	1.45307	2.01081	1.37441
CG31321	0.0883473	0.0118182	24	6	0.544658	3.6097	3.79383	3.53642	3.50618	3.64465	3.18651	2.94283	3.02079	2.54395	2.81592	2.55238
Mal-A8	0.0883473	0.0118182	24	15	0.541011	5.44564	4.86084	5.25322	6.31434	6.34617	6.35999	6.68761	6.68097	6.65313	6.33915	6.24358
CG8834	0.0883473	0.0118182	24	6	0.527898	4.61541	4.57887	4.61224	4.33235	4.63844	4.15347	4.3491	4.26505	2.11752	2.18255	2.08705
CG9451	0.0883473	0.0118182	24	6	0.502275	6.09845	5.9458	6.33648	5.91976	6.17973	5.78518	5.62251	5.89943	5.04025	5.15609	4.95584
CG10339	0.0883473	0.0118182	24	9	0.500404	2.5556	2.58668	2.49609	3.29019	3.3218	3.26812	3.14843	2.87836	2.40966	2.95529	2.28411
CG32726	0.0883473	0.0118182	24	9	0.497806	1.58549	1.67218	1.51336	2.33876	2.19681	2.16213	2.29571	2.11449	1.21924	1.76638	1.30372
CG10184	0.0883473	0.0118182	24	6	0.480158	4.96462	4.81312	4.72642	4.76275	4.98608	4.09542	4.21566	4.26479	4.13044	4.14497	4.06122
CG9649	0.0883473	0.0118182	24	6	0.472282	5.96266	5.95464	5.89936	5.84499	5.99691	5.34409	5.23024	5.30392	5.03246	5.29828	5.21655
CG11437	0.0883473	0.0118182	24	6	0.453364	3.17225	3.29412	3.21733	3.14355	3.29342	2.86134	2.72893	2.73303	2.29307	2.4516	2.50546
CG9616	0.0883473	0.0118182	24	9	0.445791	2.68108	3.22039	3.10163	3.12769	3.59883	3.24156	3.30623	3.25374	2.1056	2.18966	2.54764
snoRNA:Me28S-G764	0.0883473	0.0118182	18	15	0.436897	1.51825	2.13612	1.92313	1.40984	1.20385	2.14497	2.10736	2.26509	1.35087	1.65231	1.91418
CG5397	0.0883473	0.0118182	18	9	0.424178	4.94417	5.16833	4.92843	5.67247	5.76123	5.70038	5.58912	5.7092	5.11247	5.54279	5.09643
Act88F	0.0883473	0.0118182	24	3	0.415575	7.89222	7.76872	8.25198	7.70582	7.91747	7.05767	7.11455	7.49588	7.49914	7.33029	7.20469
CG18088	0.0883473	0.0118182	18	3	0.409117	1.96864	2.11987	2.11974	1.74788	1.6691	1.41823	1.28606	1.38648	2.01542	2.05364	2.25608
CG17108	0.0883473	0.0118182	24	21	0.401257	10.7767	10.7541	10.6554	9.9032	10.2299	10.2099	10.3108	10.1527	10.6792	10.9833	10.8065
CG31291	0.0883473	0.0118182	24	9	0.394087	2.39613	2.40037	2.28868	3.02554	2.95407	2.93809	2.88483	2.69448	2.27514	2.82204	2.11487
CG7227	0.0883473	0.0118182	18	9	0.392925	2.16261	2.54762	2.35516	3.11569	3.11339	2.91619	2.54403	2.87711	2.83918	2.4729	2.73264
CG10383	0.0883473	0.0118182	24	21	0.388806	5.03801	5.13971	4.92929	4.51402	4.55232	4.64969	4.57727	4.47254	5.17336	5.01429	5.50042
CG9914	0.0883473	0.0118182	24	9	0.376495	7.70298	7.50437	7.59141	7.9432	8.23661	7.88278	8.11855	8.15966	7.30556	7.65468	7.39439
yellow-e	0.0883473	0.0118182	18	12	0.375688	5.63197	5.80038	5.87879	6.20432	6.21924	6.55685	6.40666	6.41353	5.68292	5.89663	5.59823
PO45	0.0883473	0.0118182	24	6	0.364561	4.82855	4.98902	4.56525	4.95188	5.08246	4.58431	4.63269	4.64915	4.06426	4.27261	3.88443
l(2)34Fc	0.0883473	0.0118182	18	9	0.360732	6.96768	6.85993	6.86874	7.3308	7.49896	7.45874	7.35982	7.46755	6.94785	7.15655	7.03512
CG10799	0.0883473	0.0118182	24	21	0.357494	6.8398	6.97997	6.8339	6.30796	6.68679	6.5044	6.49477	6.35047	7.05043	6.97227	7.34306
CG43402	0.0883473	0.0118182	18	9	0.355528	4.88241	4.95704	5.11365	5.61307	5.76017	5.46995	5.17274	5.37017	5.25111	4.92455	5.3379
to	0.0883473	0.0118182	24	21	0.352508	8.58283	8.0726	8.32253	7.82049	7.79879	8.01046	7.88505	7.83456	8.4096	8.20414	8.43036
Cpr47Ea	0.0883473	0.0118182	24	21	0.349505	3.60102	3.89426	3.8425	3.30637	3.58444	3.64537	3.36748	3.38558	4.1049	3.88141	4.23775
CG2650	0.0883473	0.0118182	24	15	0.345844	1.79258	1.79734	1.94465	2.43023	2.44864	2.5353	2.74663	2.6605	2.26893	2.59267	2.6234
GstD5	0.0883473	0.0118182	24	9	0.345569	2.28055	2.01273	1.99126	2.40777	2.47613	2.17319	2.24455	2.52667	1.73099	1.72907	1.71005
Ugt35a	0.0883473	0.0118182	24	6	0.339208	4.68834	5.0251	4.78985	5.10646	5.01326	4.74273	4.51679	4.36569	4.18542	4.30718	4.57057
CG31075	0.0883473	0.0118182	24	9	0.337074	6.00131	5.97769	5.93317	6.53772	6.6155	6.38165	6.42411	6.3988	5.82611	6.13097	5.93523
CG13856	0.0883473	0.0118182	18	12	0.333769	2.69618	2.80686	2.8466	3.05158	3.26922	3.41704	3.30322	3.32507	2.77412	2.83851	2.71701
ple	0.0883473	0.0118182	24	6	0.331866	5.73908	5.97161	5.6545	5.82408	5.70222	5.35606	5.26047	5.33175	5.21366	5.32716	5.18829
dro4	0.0883473	0.0118182	24	9	0.331793	9.25159	9.12095	9.24401	9.58818	9.98766	9.58187	9.61896	9.54947	8.99935	9.26513	8.974
CG6295	0.0883473	0.0118182	18	12	0.331126	8.60388	8.44627	8.38994	8.27734	8.99837	9.02923	8.63355	9.31798	7.99461	8.25403	7.8308
CG43349	0.0883473	0.0118182	18	6	0.33094	4.13467	4.31738	4.44506	5.10796	4.9259	4.06381	4.35004	4.43884	4.52117	4.52152	4.49248
Msr-110	0.0883473	0.0118182	24	9	0.329531	8.84139	8.93979	8.8127	9.39717	9.38523	9.31393	9.29312	9.25598	8.79966	9.07331	8.83217
CG43236	0.0883473	0.0118182	24	9	0.323178	3.89401	4.35536	3.72503	4.54322	4.3777	4.28094	3.91201	4.0054	3.83937	3.60236	3.25172
CG31997	0.0883473	0.0118182	18	9	0.321083	6.25905	6.31641	6.0756	6.56244	6.89327	6.81728	6.64772	6.61864	6.34179	6.61746	6.53937
Lcp65Ag2	0.0883473	0.0118182	18	9	0.314419	1.16886	1.3041	1.37418	1.47848	1.83578	1.64431	1.83143	1.7488	1.4602	1.51301	1.46589
snoRNA:Me18S-G1358b	0.0883473	0.0118182	18	0	0.308193	1.78175	1.53905	1.87882	1	1.21143	1.37456	1.16359	1.34899	1.51553	1.3078	1.59555
CG9796	0.0883473	0.0118182	18	9	0.307539	6.00647	6.18786	6.06752	6.55091	6.66185	6.56349	6.5048	6.49067	6.2767	6.55812	6.44308
CG7236	0.0883473	0.0118182	18	9	0.295658	1.94813	2.26486	2.02968	2.53463	2.71617	2.49129	2.37461	2.44865	2.15212	2.33222	1.78845
CG10550	0.0883473	0.0118182	24	12	0.290371	6.6285	6.74486	6.5603	6.91984	7.01968	7.2188	7.10027	7.10311	6.60723	6.86643	6.6174
snoRNA:Psi28S-3327c	0.0883473	0.0118182	18	0	0.289006	1.97323	1.78916	1.88663	1.57348	1.22541	1.7441	1.17459	1.57405	1.75728	1.8192	1.62999
CG31324	0.0883473	0.0118182	24	18	0.286212	2.75009	2.70936	2.48942	2.71211	2.74782	3.02909	2.90281	3.04575	3.15729	3.23587	3.1873
CG8738	0.0883473	0.0118182	24	9	0.283652	4.16318	4.24783	4.07882	4.57273	4.6766	4.49503	4.55592	4.50657	4.01507	4.40549	4.14014
Phae2	0.0883473	0.0118182	18	9	0.282748	6.61889	6.4781	6.4249	6.92355	6.97317	6.72554	6.89193	7.01274	6.83331	6.70193	6.79394
CG16712	0.0883473	0.0118182	18	9	0.282022	8.74803	8.78178	8.74134	9.01011	9.30187	9.1197	9.1984	9.1491	8.99236	9.0085	9.03781
CG1600	0.0883473	0.0118182	18	12	0.281355	6.55633	6.4068	6.59606	6.41508	6.4669	6.78737	6.95148	6.9967	5.96404	5.92633	5.73113
B4	0.0883473	0.0118182	18	0	0.28106	4.30717	4.31402	4.24623	4.02422	3.67301	3.91965	3.8824	3.84564	4.06134	3.98832	4.04324
CG1124	0.0883473	0.0118182	24	9	0.280797	6.85839	6.89905	6.94642	7.20415	7.3193	6.94213	6.79878	6.97781	6.41977	6.21291	6.49368
Tsp74F	0.0883473	0.0118182	24	9	0.279046	5.59996	5.66725	5.47351	5.89302	5.88223	6.0112	5.87146	5.73049	5.32917	5.61726	5.40471
CG9674	0.0883473	0.0118182	18	0	0.277973	7.48068	7.42652	7.39349	7.11208	6.83758	7.0471	7.06797	7.01972	7.34617	7.42342	7.3091
CG14367	0.0883473	0.0118182	18	9	0.276361	2.60052	2.77409	2.63565	3.14068	3.2096	3.07102	3.02645	2.97063	2.64882	2.85878	2.58219
Tal	0.0883473	0.0118182	24	6	0.275753	8.03162	7.93786	8.02984	8.00199	8.21699	7.78016	7.9552	7.96365	7.36775	7.55491	7.36823
snoRNA:SC35-b	0.0883473	0.0118182	24	0	0.27372	2.22643	2.20589	1.92313	1.62999	1.81462	1.68321	1.75933	1.43388	2.1178	1.93712	1.91418
CG6084	0.0883473	0.0118182	24	6	0.271675	8.18125	8.04741	8.08961	7.9906	8.2372	7.978	7.87373	8.01349	7.49913	7.48896	7.49749
CG3376	0.0883473	0.0118182	18	3	0.266843	4.7567	4.60521	4.6592	4.28062	4.2272	3.98605	4.0764	4.26833	4.48543	4.86536	4.81717
fbp	0.0883473	0.0118182	24	0	0.263074	6.57275	6.39838	6.62379	6.2245	6.31597	5.97186	6.0082	6.19897	6.46745	6.57578	6.56625
CG10348	0.0883473	0.0118182	24	12	0.262709	2.95582	3.08524	2.82953	3.32129	3.23947	3.47118	3.46777	3.44747	2.95255	3.43005	3.09345
CG12268	0.0883473	0.0118182	24	12	0.260305	2.38991	2.44506	2.46298	2.56755	2.70166	3.09582	2.96405	2.92471	2.38227	2.62439	2.54519
Cpr65Au	0.0883473	0.0118182	18	9	0.256488	8.58281	8.73354	8.56969	8.95199	9.14327	9.07186	8.92012	9.01836	8.59673	8.79076	8.63064
GstD1	0.0883473	0.0118182	18	9	0.256124	8.39496	8.3752	8.2492	8.70951	8.83571	8.65527	8.85797	8.58868	8.31155	8.49326	8.46431
LKR	0.0883473	0.0118182	18	6	0.256087	3.24682	3.17283	3.18924	3.53436	3.53687	2.75325	2.74473	2.79144	3.20786	3.15622	3.36161
CG32444	0.0883473	0.0118182	18	9	0.254202	8.77182	8.4095	8.33471	8.97639	9.03258	8.78287	8.95084	8.87676	8.37201	8.8146	8.56339
CG7510	0.0883473	0.0118182	24	0	0.25404	5.94374	5.94421	5.88425	5.58324	5.33395	5.34406	5.33597	5.2744	5.53751	5.58031	5.60473
grass	0.0883473	0.0118182	24	9	0.253578	4.88326	4.95593	4.84236	5.41465	5.4459	5.05463	5.21244	5.00396	4.72527	5.04661	4.70676
CG32121	0.0883473	0.0118182	24	9	0.251355	4.63564	4.76262	4.65976	5.36082	5.24793	5.01533	4.99095	4.90398	4.68453	4.56419	4.68605
yellow-h	0.0883473	0.0118182	18	9	0.249138	3.29968	3.25972	3.18623	3.62648	3.70419	3.73753	3.49121	3.45715	3.2424	3.44239	3.42321
CG13631	0.0883473	0.0118182	24	21	0.241972	6.19618	6.13661	6.13624	5.84577	5.76001	6.18161	6.16797	6.03556	6.48183	6.50697	6.55192
CG17278	0.0883473	0.0118182	24	6	0.240794	5.65491	5.67683	5.58409	6.26475	6.44992	5.80083	5.55765	5.60717	5.25014	5.45716	5.31898
CG4825	0.0883473	0.0118182	24	3	0.239966	4.90834	4.98633	4.88156	4.78554	4.84718	4.39229	4.28803	4.34232	4.75083	4.62405	4.92081
alpha-Est1	0.0883473	0.0118182	24	9	0.239421	5.62974	5.61518	5.50944	6.09987	6.07612	5.84296	5.82769	5.70165	5.2733	5.82452	5.4854
CG14007	0.0883473	0.0118182	18	9	0.237478	1.12781	1.09313	1.23679	1.57162	1.5391	1.5279	1.46467	1.48836	1.13072	1.32632	1.08431
CG14439	0.0883473	0.0118182	18	12	0.236078	5.99673	6.1768	5.96073	6.05099	6.24489	6.47299	6.47242	6.333	5.87635	6.11197	5.87887
Syx4	0.0883473	0.0118182	24	6	0.23547	3.3221	3.2756	3.21936	3.2566	3.25132	3.14665	2.94708	3.09988	2.83839	2.76795	2.88413
Sodh-2	0.0883473	0.0118182	24	9	0.235202	6.28173	6.18347	6.20345	6.48075	6.69508	6.48294	6.5168	6.51781	6.14274	6.18698	5.95615
Ate1	0.0883473	0.0118182	24	3	0.234889	4.83596	4.84795	4.83807	4.4717	4.61283	4.4075	4.41318	4.31422	4.34438	4.3507	4.44864
CG9542	0.0883473	0.0118182	18	9	0.231828	3.97645	4.12337	4.00208	4.43912	4.61992	4.38193	4.29123	4.23662	3.9181	4.1326	4.00415
CG6739	0.0883473	0.0118182	24	12	0.229549	1.7269	1.55648	1.60318	1.90374	1.80913	2.17022	2.06887	2.08382	1.69493	1.91551	1.68348
CG13397	0.0883473	0.0118182	24	18	0.228557	3.34116	3.30358	3.21692	3.05002	3.12235	3.51467	3.58744	3.53578	3.40675	3.55498	3.64741
Sodh-1	0.0883473	0.0118182	18	12	0.227994	7.30434	6.94594	7.03502	7.43697	7.64509	7.42814	7.68871	7.64816	6.79528	7.13776	6.79841
nec	0.0883473	0.0118182	18	9	0.226716	6.86547	6.86127	6.79894	7.18132	7.27374	7.01169	7.21371	7.0929	6.86559	7.1486	7.0387
CG14778	0.0883473	0.0118182	18	9	0.225572	4.49679	4.38428	4.39957	4.70441	4.9434	4.66	4.81467	4.72075	4.60475	4.68432	4.66411
CG8550	0.0883473	0.0118182	24	12	0.225367	2.40514	2.77985	2.46494	3.07419	3.03763	3.45416	3.28617	3.19394	3.02346	3.38664	2.97307
Cyp4p1	0.0883473	0.0118182	24	6	0.225198	5.67806	5.4705	5.59821	5.4812	5.72768	5.52841	5.45411	5.43776	5.0549	5.0349	5.1421
CG33679	0.0883473	0.0118182	18	9	0.224866	1.30123	1.33201	1.22239	1.68791	1.55618	1.54245	1.75855	1.47473	1.32884	1.37329	1.32634
Cpr97Eb	0.0883473	0.0118182	24	12	0.222667	3.60088	3.70138	3.65975	3.80677	4.0764	4.21075	3.92682	4.01237	3.62891	3.71722	3.71932
CG18327	0.0883473	0.0118182	24	21	0.22191	3.07264	2.95974	3.17683	2.68876	2.79026	2.81687	2.75988	3.04217	3.10775	3.10516	3.22031
CG5854	0.0883473	0.0118182	18	9	0.220793	3.49824	3.60267	3.47433	3.83003	3.86616	3.80966	3.7024	3.91739	3.67325	3.73526	3.78413
CHKov2	0.0883473	0.0118182	24	3	0.217061	4.567	4.64469	4.57737	4.57574	4.50577	4.39412	4.16767	4.19892	4.22638	4.2975	4.36018
CG8468	0.0883473	0.0118182	24	21	0.216212	2.71069	2.63495	3.00384	2.60288	2.4062	2.60881	2.87427	2.82263	3.08653	3.18132	3.14212
CG43103	0.0883473	0.0118182	24	0	0.214966	6.21105	6.21352	6.19843	5.73377	6.12796	5.61039	5.65047	5.83999	5.92758	5.90275	6.04238
Sesn	0.0883473	0.0118182	18	0	0.212238	6.50465	6.43786	6.46883	6.13686	6.04565	6.24222	6.24066	6.12986	6.48146	6.38958	6.43947
CG10527	0.0883473	0.0118182	18	9	0.21094	7.69037	7.71134	7.6455	7.9467	8.18964	7.85783	8.02454	7.8627	7.69236	7.8715	7.74272
CG14984	0.0883473	0.0118182	24	9	0.210576	5.07821	5.39446	5.14909	5.43629	5.72494	5.4035	5.31649	5.10046	4.86943	5.0896	5.02575
CG15695	0.0883473	0.0118182	24	9	0.208791	3.34615	3.56138	3.3305	3.72055	3.59139	3.6482	3.56245	3.61899	3.36134	3.2552	3.18953
AnnX	0.0883473	0.0118182	18	9	0.207604	6.27881	6.28915	6.27967	6.57594	6.71351	6.6211	6.56789	6.52257	6.33448	6.59177	6.31492
CG33511	0.0883473	0.0118182	24	12	0.205914	1.12725	1.22278	1.31611	1.70298	1.37118	1.47462	1.60727	1.94405	1.42178	1.35843	1.243
CG11835	0.0883473	0.0118182	18	9	0.205808	4.24735	4.16586	4.14946	4.6066	4.67079	4.40803	4.44872	4.28599	4.30396	4.43303	4.32118
CG32017	0.0883473	0.0118182	24	21	0.204267	4.77589	4.67901	4.69842	4.38745	4.17015	4.54161	4.39274	4.52645	4.81529	4.57318	4.74369
CG5142	0.0883473	0.0118182	24	9	0.203799	1.90724	2.02593	2.04628	2.43699	2.38216	2.26454	2.20814	2.10194	1.95344	2.07117	1.88661
onecut	0.0883473	0.0118182	24	21	0.203608	3.74762	3.67542	3.79784	3.5051	2.85252	3.52754	3.41115	3.52015	3.82585	3.6709	3.80329
Art8	0.0883473	0.0118182	18	6	0.202598	2.37885	2.35202	2.55435	2.5538	2.76921	2.2195	2.09231	2.25144	2.63457	2.6639	2.61981
Neurochondrin	0.0883473	0.0118182	18	9	0.201445	5.24065	5.11735	5.18694	5.50705	5.54613	5.48894	5.47067	5.23789	5.34343	5.38048	5.40757
CG30285	0.0883473	0.0118182	24	9	0.199224	6.59931	6.75858	6.58208	6.9983	7.17002	6.95888	6.81772	6.8307	6.67481	6.6833	6.57477
CG11044	0.0883473	0.0118182	18	9	0.198491	5.24007	5.31552	5.10861	5.61936	5.69212	5.43239	5.47009	5.32407	5.44268	5.42166	5.41418
CG34306	0.0883473	0.0118182	24	21	0.195716	2.36313	2.19952	2.37218	2.0487	1.50077	2.09227	2.06194	2.18797	2.52803	2.32237	2.27048
CG5532	0.0883473	0.0118182	18	9	0.193914	5.84818	5.88494	5.8817	6.18945	6.34648	6.00519	6.11774	6.08326	6.00049	6.22753	5.98184
Cyp12d1-p	0.0883473	0.0118182	24	18	0.193793	2.8534	2.89432	3.01912	2.7161	2.82062	2.98426	3.10072	3.20847	3.19513	3.26772	3.02301
RNaseP:RNA	0.0883473	0.0118182	24	0	0.192495	5.31614	4.68965	4.55804	4.55005	4.53242	4.34285	4.4354	4.32416	4.63463	4.66587	4.79391
Ugt86Dd	0.0883473	0.0118182	24	15	0.191911	6.11301	5.99291	6.196	6.04056	6.13283	6.38419	6.42196	6.51712	6.18811	6.33316	6.33696
CG13369	0.0883473	0.0118182	18	9	0.19171	5.39379	5.28898	5.35864	5.65962	5.85967	5.4507	5.64465	5.62756	5.51989	5.63608	5.38369
ico	0.0883473	0.0118182	24	21	0.191342	4.05503	4.06127	3.93912	3.71877	3.84805	3.85334	3.78515	3.68511	4.07559	4.05694	4.15157
CG15546	0.0883473	0.0118182	18	9	0.189682	3.96996	3.80927	3.86789	4.3529	4.25945	4.1149	4.01127	4.093	3.88184	3.8813	3.8542
Atg13	0.0883473	0.0118182	24	18	0.18915	4.83272	4.85702	4.76649	4.91228	4.76295	5.11828	5.08347	5.02447	5.12004	5.0935	5.18522
CG11200	0.0883473	0.0118182	24	12	0.189032	5.15228	5.24918	5.0595	5.55754	5.5786	5.66667	5.56816	5.58697	5.3544	5.584	5.40239
CG3011	0.0883473	0.0118182	24	12	0.188922	6.57138	6.40665	6.44435	6.57647	6.68509	6.77023	7.00842	6.90946	6.46522	6.69362	6.53706
CG7970	0.0883473	0.0118182	18	9	0.187973	5.41297	5.44007	5.48336	5.74193	5.83703	5.54805	5.62606	5.73394	5.52736	5.72773	5.6528
jv	0.0883473	0.0118182	18	12	0.187748	1.56235	1.59401	1.54757	1.73085	1.62364	1.86497	1.8837	1.83726	1.48414	1.69299	1.41135
CG31869	0.0883473	0.0118182	18	3	0.187518	3.64428	3.75318	3.61624	3.49927	3.36155	3.36517	3.35015	3.30102	3.58333	3.78548	3.77853
CG30345	0.0883473	0.0118182	24	12	0.186961	3.42128	3.42117	3.48179	3.66845	3.48398	3.83469	3.77966	3.74657	3.48238	3.41268	3.46504
CG42392	0.0883473	0.0118182	24	21	0.186383	2.47541	2.71722	2.55806	2.37523	1.68203	2.31465	2.45626	2.37294	2.74979	2.63411	2.62217
CG30049	0.0883473	0.0118182	24	15	0.186258	1.64329	1.6007	1.5922	2.04485	1.96853	2.12882	2.04012	2.15916	2.06927	1.97561	2.03952
Lmpt	0.0883473	0.0118182	18	0	0.185953	7.1851	7.25703	7.13935	6.93253	6.82021	6.95805	6.94303	6.82342	7.0197	6.85539	7.01904
CG4393	0.0883473	0.0118182	24	21	0.185906	3.4134	3.44817	3.47199	3.4299	2.86234	3.26459	3.31093	3.29299	3.63503	3.69896	3.58509
CG12824	0.0883473	0.0118182	18	9	0.185421	1.39174	1.50423	1.59574	1.95861	1.85817	1.5828	1.67028	1.67108	1.62752	1.53861	1.56612
CG7365	0.0883473	0.0118182	24	12	0.184993	1.35435	1.42411	1.26284	1.52469	1.58021	1.6623	1.6915	1.62938	1.2686	1.39651	1.42318
Syn	0.0883473	0.0118182	24	21	0.184926	4.89387	4.80942	4.89694	4.60257	4.1908	4.67974	4.56609	4.74664	5.04188	4.82812	4.89616
CG42324	0.0883473	0.0118182	24	18	0.184657	3.2263	3.17415	3.20291	3.31073	2.89812	3.46842	3.4297	3.3665	3.44064	3.53865	3.53343
CG43221	0.0883473	0.0118182	24	6	0.183797	1.40172	1.49004	1.48487	1.57348	2.16359	1.39793	1.22839	1.25759	1.14047	1.22635	1.44894
ap	0.0883473	0.0118182	24	15	0.181159	3.5111	3.37247	3.32823	3.63593	3.38935	3.77076	3.66874	3.72776	3.58689	3.6812	3.71034
Dh31-R1	0.0883473	0.0118182	18	15	0.179986	3.24244	3.21572	3.34608	3.07473	2.95037	3.36992	3.31845	3.62512	3.0605	3.0504	3.05373
Amy-p	0.0883473	0.0118182	24	6	0.179846	10.6857	10.5342	10.581	10.6278	10.7417	10.6833	10.5098	10.5183	10.1995	10.1672	10.2489
TRAM	0.0883473	0.0118182	18	9	0.177676	4.12485	4.16153	4.18665	4.49381	4.59128	4.25944	4.29544	4.4026	4.25291	4.34794	4.33263
GNBP2	0.0883473	0.0118182	24	9	0.177491	5.42031	5.34646	5.28889	5.59812	5.69052	5.56409	5.58274	5.56147	5.27424	5.45185	5.31697
mGluRA	0.0883473	0.0118182	24	21	0.176987	2.56552	2.51013	2.51667	2.34176	1.97079	2.40059	2.22296	2.34511	2.61402	2.44668	2.63067
CG14079	0.0883473	0.0118182	18	9	0.175986	1.25578	1.31542	1.36103	1.72466	1.73933	1.51612	1.45025	1.46477	1.26592	1.36957	1.2785
CG13004	0.0883473	0.0118182	24	12	0.175965	3.83217	3.82425	3.8214	4.0039	3.93032	4.2302	4.16055	4.23534	3.98392	3.80767	3.92964
CG42669	0.0883473	0.0118182	24	15	0.175783	4.66146	4.73326	4.56139	4.7822	4.51817	4.95098	5.07705	4.91954	4.83794	4.89892	4.75457
CG9391	0.0883473	0.0118182	18	9	0.174607	4.99825	5.08173	5.08288	5.39124	5.47712	5.23951	5.21558	5.29743	5.04598	5.28295	5.15187
nimB4	0.0883473	0.0118182	24	6	0.174157	3.38764	3.37639	3.44633	3.47447	3.65095	3.38524	3.38368	3.39327	3.05389	3.1209	3.14902
CG9171	0.0883473	0.0118182	24	21	0.173939	4.2286	4.2075	4.21209	4.07662	3.76967	3.99367	4.00783	4.0694	4.33769	4.2182	4.4093
Ppcs	0.0883473	0.0118182	24	18	0.17313	3.62126	3.52093	3.44237	3.37553	3.21835	3.59107	3.6975	3.70526	3.70107	3.71017	3.63043
CG17834	0.0883473	0.0118182	18	12	0.17301	3.2491	3.33779	3.26196	3.35803	3.41191	3.67046	3.60613	3.49035	3.19855	3.39816	3.23727
pncr009:3L	0.0883473	0.0118182	18	9	0.172926	4.02427	3.93024	3.73197	4.17425	4.40009	4.09441	4.21065	4.17498	4.03083	4.0153	4.11909
CG3036	0.0883473	0.0118182	18	3	0.172399	6.46199	6.39267	6.45191	6.47701	6.43904	6.23717	6.07636	5.96525	6.9561	6.95639	7.05183
uzip	0.0883473	0.0118182	24	15	0.17184	5.32854	5.49501	5.26586	5.42677	5.32762	5.83457	5.66424	5.68164	5.4766	5.57279	5.51537
alphaTub84B	0.0883473	0.0118182	18	9	0.171432	9.25766	9.20828	9.28185	9.49793	9.68861	9.48951	9.50227	9.44783	9.45167	9.45866	9.46624
pyr	0.0883473	0.0118182	24	3	0.17107	3.24987	3.23625	3.18473	3.1712	3.03769	2.93349	2.99251	2.88422	2.90322	2.98712	2.97446
Tsf2	0.0883473	0.0118182	18	9	0.169129	4.26744	4.34563	4.2388	4.53352	4.58895	4.60235	4.47385	4.46678	4.40022	4.52647	4.40174
l(1)G0469	0.0883473	0.0118182	18	3	0.169118	3.80942	3.78503	3.81996	4.00767	3.76739	3.61511	3.59057	3.51844	4.04225	3.94646	4.05273
CG4911	0.0883473	0.0118182	18	0	0.168894	4.75958	4.74681	4.74998	4.626	3.91038	4.53716	4.5278	4.49931	4.69438	4.59749	4.65565
CG30195	0.0883473	0.0118182	24	9	0.168231	1.82175	1.7774	1.97613	2.12552	2.20545	2.06367	2.07311	2.03029	1.92802	1.93046	1.76392
tld	0.0883473	0.0118182	24	18	0.168016	1.80833	1.69592	1.73671	1.61762	1.75801	1.97474	1.96516	1.89376	1.908	2.05929	2.04552
CG9628	0.0883473	0.0118182	24	9	0.167708	7.7248	7.74951	7.63494	7.9476	8.11054	7.98929	7.85832	7.87945	7.67068	7.6771	7.72418
CG10359	0.0883473	0.0118182	24	9	0.167409	3.02874	3.10346	3.19491	3.20073	3.27186	3.28503	3.17184	3.20755	2.78909	2.9766	2.69817
Gs2	0.0883473	0.0118182	18	9	0.167406	9.29365	9.33542	9.3067	9.45959	9.60006	9.58678	9.53696	9.54341	9.33737	9.41073	9.31765
Pcd	0.0883473	0.0118182	18	9	0.167043	5.49295	5.38122	5.37107	5.57396	5.94247	5.68684	5.61238	5.6421	5.56513	5.58724	5.54819
Hsp70Bb	0.0883473	0.0118182	18	9	0.164967	1.29137	1.2551	1.23312	1.60491	1.41524	1.52799	1.50291	1.37084	1.39048	1.3664	1.3772
CG7639	0.0883473	0.0118182	18	9	0.164382	4.03002	4.05646	4.03928	4.40555	4.34034	4.26712	4.20156	4.23728	4.19388	4.20221	4.28744
CG31769	0.0883473	0.0118182	24	12	0.163804	7.10808	7.19161	7.08752	7.29719	7.49588	7.50823	7.48823	7.46122	7.25369	7.42645	7.45209
LRP1	0.0883473	0.0118182	24	21	0.163281	3.48692	3.49624	3.56585	3.48877	2.84983	3.34046	3.36904	3.33011	3.68388	3.69653	3.59512
Tim17a2	0.0883473	0.0118182	24	3	0.162363	1.77197	1.59863	1.58577	1.45485	1.50394	1.3503	1.32704	1.27156	1.24392	1.49975	1.37177
lft	0.0883473	0.0118182	18	9	0.162284	4.47122	4.5273	4.38944	4.75305	4.89261	4.70448	4.67126	4.49517	4.55414	4.65759	4.63364
brk	0.0883473	0.0118182	24	0	0.161699	3.40964	3.39078	3.30063	3.26704	3.04874	3.089	3.04666	3.06304	3.31799	3.22726	3.27502
CG42326	0.0883473	0.0118182	24	12	0.160784	1.9722	1.96944	1.82818	2.1927	1.9957	2.29198	2.24517	2.27669	2.08095	2.07562	1.86907
CG10200	0.0883473	0.0118182	24	6	0.160579	5.01899	5.12598	4.96222	5.1948	5.54964	4.96729	5.09402	4.97358	4.62378	4.8993	4.75776
CG13738	0.0883473	0.0118182	18	9	0.160083	2.67094	2.45769	2.42948	2.80835	2.90086	2.73678	2.73713	2.61455	2.70866	2.52815	2.69854
ash2	0.0883473	0.0118182	18	9	0.159961	3.52983	3.64104	3.50508	3.84566	3.942	3.73362	3.78363	3.73906	3.62206	3.73728	3.76479
ck	0.0883473	0.0118182	24	18	0.159737	3.34692	3.38617	3.3615	3.5006	3.18363	3.52971	3.56271	3.45734	3.63338	3.70264	3.62895
CG17026	0.0883473	0.0118182	24	9	0.159454	3.76889	3.92421	3.80199	3.97872	4.17274	3.9744	3.89006	4.0144	3.56554	3.84981	3.65857
mbf1	0.0883473	0.0118182	18	9	0.159069	4.69409	4.76489	4.72357	5.01038	5.0121	4.93749	4.93008	4.84034	4.88585	4.80924	5.00397
Pli	0.0883473	0.0118182	24	18	0.158261	4.19235	4.18719	4.18177	4.24013	4.09676	4.34475	4.25712	4.41397	4.40778	4.45602	4.5293
Rootletin	0.0883473	0.0118182	18	15	0.156658	1.89101	1.99414	2.02682	1.89463	1.76699	2.20769	2.19263	2.29426	1.89767	1.93476	1.85396
CG11400	0.0883473	0.0118182	24	3	0.155313	7.44049	7.46608	7.42596	7.23974	7.37439	7.19034	7.07993	7.11334	7.17425	7.25008	7.4221
CG14526	0.0883473	0.0118182	24	21	0.155225	6.02552	6.15491	6.10926	5.79293	5.92276	6.02799	6.07361	6.14988	6.2424	6.34152	6.38612
CG18745	0.0883473	0.0118182	18	6	0.154337	3.32713	3.13922	3.19323	3.4092	3.5709	3.07973	3.0889	3.28198	3.45848	3.37866	3.44778
yellow-g	0.0883473	0.0118182	24	6	0.152504	1.86612	1.68979	1.85296	1.87388	2.1361	1.80274	1.5938	1.71046	1.52549	1.66955	1.64058
B-H1	0.0883473	0.0118182	18	12	0.15183	1.5435	1.5857	1.59266	1.86919	1.77858	1.88199	1.94227	1.8039	1.51199	1.77758	1.4626
l(2)k09913	0.0883473	0.0118182	18	9	0.150338	6.91406	6.92869	6.91245	7.1243	7.15087	7.14302	7.13446	7.0471	7.07401	7.0891	7.02891
Sgf11	0.0883473	0.0118182	18	6	0.149924	3.51597	3.49839	3.71123	3.71902	3.87153	3.50661	3.48062	3.47908	3.61843	3.64401	3.63521
CG7006	0.0883473	0.0118182	18	6	0.149076	2.79771	2.6043	2.74964	2.97191	2.9425	2.71812	2.51037	2.66407	2.91628	2.91748	3.1355
RfC4	0.0883473	0.0118182	18	6	0.148223	2.83456	2.66134	2.72572	3.04623	3.00525	2.71089	2.68048	2.60396	2.79795	2.73401	2.95501
Got1	0.0883473	0.0118182	24	9	0.148035	7.7571	7.71335	7.70648	7.87261	7.89019	7.77034	7.69776	7.74776	7.36237	7.49518	7.44257
CG6937	0.0883473	0.0118182	18	6	0.148026	3.07909	3.00939	3.11724	3.18423	3.32655	2.83016	2.87121	2.97422	3.305	3.29305	3.367
CG42533	0.0883473	0.0118182	18	0	0.147699	4.44994	4.42289	4.45293	4.33738	3.76591	4.34846	4.24632	4.20121	4.33831	4.344	4.35752
GV1	0.0883473	0.0118182	24	9	0.147161	5.14439	5.26205	5.09126	5.38263	5.56683	5.28305	5.23719	5.24033	4.90747	5.21711	5.02958
Dscam2	0.0883473	0.0118182	24	21	0.147036	2.92357	2.82775	2.9485	2.77059	2.267	2.7281	2.70351	2.8	3.12051	2.86706	2.95495
CG7180	0.0883473	0.0118182	18	0	0.146472	5.13837	5.22401	5.10188	4.85921	4.83633	5.06172	5.05506	4.90999	5.13745	5.11619	5.17497
Gdh	0.0883473	0.0118182	24	9	0.146061	6.82629	6.76759	6.78856	7.04402	7.02218	7.01957	6.92796	6.95826	6.81309	6.81921	6.67416
Karl	0.0883473	0.0118182	24	9	0.145372	4.21389	4.16559	4.24104	4.41364	4.34809	4.27068	4.00997	4.24007	3.93379	3.89901	3.79855
CG15556	0.0883473	0.0118182	18	12	0.144887	4.14315	4.26451	4.17811	4.39744	4.25959	4.54066	4.45899	4.37985	4.00223	4.16295	4.1525
mbc	0.0883473	0.0118182	24	18	0.144636	4.51909	4.52004	4.5114	4.62848	4.13644	4.728	4.67104	4.67681	4.71359	4.75621	4.75498
CG8498	0.0883473	0.0118182	18	9	0.144354	5.93069	5.88904	5.93354	6.14145	6.43372	5.99521	6.07226	6.12572	6.06173	5.98881	6.12792
Pis	0.0883473	0.0118182	18	9	0.144305	5.5445	5.64071	5.64717	5.85287	5.87233	5.7572	5.83493	5.77802	5.68862	5.81313	5.8219
grsm	0.0883473	0.0118182	18	9	0.143923	4.40656	4.43897	4.45572	4.75127	4.703	4.56553	4.56083	4.63588	4.47604	4.56651	4.59078
CG42808	0.0883473	0.0118182	24	12	0.142941	9.38435	9.20918	9.39203	9.48072	9.70045	9.716	9.59392	9.62637	9.54202	9.46851	9.49803
Sry-delta	0.0883473	0.0118182	18	9	0.142463	3.41907	3.45649	3.43045	3.6487	3.65855	3.53955	3.6488	3.63018	3.44683	3.62901	3.54214
CG12926	0.0883473	0.0118182	18	9	0.14244	4.13275	3.94826	3.9794	4.20541	4.27568	4.31522	4.25947	4.1833	4.13845	4.14891	4.02823
Nelf-E	0.0883473	0.0118182	18	9	0.14208	3.51611	3.40948	3.46115	3.75346	3.69597	3.65537	3.71114	3.61586	3.49524	3.52627	3.68321
BEAF-32	0.0883473	0.0118182	18	9	0.140721	4.00581	3.96618	3.93555	4.15035	4.22612	4.15708	4.17711	4.16419	4.01351	4.00214	4.06422
CG9890	0.0883473	0.0118182	18	9	0.140355	3.73459	3.78309	3.74651	3.9467	4.06876	3.94221	3.97988	3.87794	3.86073	3.81119	3.97729
CG13822	0.0883473	0.0118182	24	9	0.140229	2.99742	3.10768	2.96513	3.24714	3.2958	3.19497	3.17284	3.14577	3.03202	2.79664	3.04807
CG12975	0.0883473	0.0118182	18	6	0.139299	3.81852	3.8353	3.87655	3.92222	4.03776	3.71137	3.60848	3.62579	4.10786	3.94741	4.02719
Dat	0.0883473	0.0118182	18	12	0.138972	6.91857	6.96342	6.83564	7.02011	7.21874	7.18296	7.08774	7.23218	6.93867	6.83016	6.77461
KrT95D	0.0883473	0.0118182	24	18	0.138966	6.78379	6.75326	6.68948	6.6645	6.49617	6.75718	6.84837	6.68763	6.9856	6.95486	6.9996
CG4587	0.0883473	0.0118182	24	21	0.137755	2.88534	2.83749	2.87492	2.68933	2.46472	2.69701	2.54964	2.74109	2.88679	2.80053	2.92867
rogdi	0.0883473	0.0118182	24	21	0.137715	4.93961	5.00156	4.94086	4.70715	4.74684	4.78231	4.76244	4.80607	4.96404	4.88927	5.00778
CG32479	0.0883473	0.0118182	24	21	0.137049	3.10064	2.96379	3.11615	2.98391	2.65331	2.92783	2.89319	2.93231	3.12614	3.12388	3.16212
spz5	0.0883473	0.0118182	24	9	0.136527	2.57509	2.64121	2.54387	3.06929	3.12914	2.78216	2.64384	2.60383	2.4501	2.63019	2.50764
CG33129	0.0883473	0.0118182	18	9	0.136299	4.72263	4.71937	4.73154	4.92639	5.00684	4.87262	4.79239	4.91802	4.7819	4.90669	4.916
rho-6	0.0883473	0.0118182	18	0	0.135964	2.00281	2.01385	1.89699	1.73498	1.71765	1.84037	1.85636	1.67857	1.85704	2.0006	1.84167
CG9769	0.0883473	0.0118182	18	9	0.135963	6.77739	6.76793	6.7748	7.02329	7.15249	6.85795	6.90695	6.92492	6.88447	6.97294	6.83739
Int6	0.0883473	0.0118182	18	9	0.134965	6.51163	6.55569	6.51436	6.73673	6.86128	6.63233	6.61086	6.72453	6.59068	6.66547	6.64065
CG8490	0.0883473	0.0118182	18	6	0.1344	2.77968	2.83865	2.91627	3.05114	2.98788	2.72797	2.53623	2.86129	2.94315	3.02468	2.90975
Est-Q	0.0883473	0.0118182	18	12	0.133434	5.51726	5.46038	5.38123	5.62148	5.58428	5.68287	5.70151	5.70522	5.32627	5.48951	5.48289
CG11505	0.0883473	0.0118182	24	21	0.133396	3.9452	3.8824	3.94747	3.80978	3.29742	3.81062	3.72064	3.73428	4.00293	3.91523	3.97299
CLS	0.0883473	0.0118182	18	3	0.132454	4.36443	4.46954	4.39336	4.41357	4.43959	4.24847	4.15744	4.2333	4.54806	4.5484	4.51237
sqd	0.0883473	0.0118182	24	21	0.131419	5.67889	5.62982	5.57766	5.59016	5.30356	5.56564	5.50854	5.50714	5.69852	5.7594	5.82211
CG10600	0.0883473	0.0118182	18	15	0.130922	4.19313	4.18884	4.18643	4.15352	3.77907	4.37198	4.382	4.18897	4.03155	4.01809	4.06404
Hn	0.0883473	0.0118182	24	12	0.130302	7.55991	7.60705	7.52481	7.78929	7.88861	7.84489	7.91067	7.83425	7.72114	7.78775	7.83671
sens	0.0883473	0.0118182	24	18	0.129055	1.69997	1.87048	1.78613	1.85482	1.68576	1.85927	1.87211	1.99548	1.94112	2.06209	2.04282
Slbp	0.0883473	0.0118182	18	9	0.128513	3.57392	3.64074	3.70871	3.8977	3.99247	3.67558	3.77443	3.74842	3.66232	3.64577	3.73254
sky	0.0883473	0.0118182	24	21	0.128151	2.7863	2.75524	2.68227	2.58073	1.91543	2.65271	2.5876	2.55592	2.77108	2.72211	2.79655
Liprin-beta	0.0883473	0.0118182	18	9	0.127962	4.94834	4.94671	4.9118	5.15171	5.14103	5.1274	5.0821	4.99798	5.07049	5.05165	5.10561
CG5599	0.0883473	0.0118182	24	6	0.127602	3.85929	3.83335	3.95488	3.98632	4.03821	3.78015	3.78763	3.91807	3.57434	3.6523	3.80646
CG31676	0.0883473	0.0118182	24	9	0.127333	5.64521	5.80286	5.64543	5.84392	5.95642	5.83646	5.81646	5.72948	5.58861	5.7447	5.63492
CG8909	0.0883473	0.0118182	24	21	0.126996	3.95353	3.82501	3.90658	3.72447	3.2673	3.775	3.72471	3.74354	4.0975	3.84002	3.89015
Drep-2	0.0883473	0.0118182	18	0	0.126871	2.19504	2.12935	2.12631	1.98833	1.79844	1.9984	1.94977	2.01578	2.203	2.05853	2.11811
CG30339	0.0883473	0.0118182	24	12	0.12682	3.85502	3.81143	3.81853	3.94422	4.01468	4.05069	4.03418	4.27614	4.01902	3.81944	4.01457
Wnk	0.0883473	0.0118182	18	0	0.126495	5.15733	5.21466	5.13154	4.99794	4.45133	5.05947	5.05722	4.93315	5.1905	5.14487	5.09171
CG32053	0.0883473	0.0118182	18	9	0.125851	1.22242	1.23694	1.21395	1.33796	1.53236	1.36191	1.44548	1.37876	1.33967	1.29395	1.25037
CadN	0.0883473	0.0118182	24	21	0.125844	2.36307	2.27513	2.32864	2.18142	1.88001	2.2266	2.11252	2.21782	2.44006	2.29183	2.35805
RpS17	0.0883473	0.0118182	18	9	0.125821	9.63579	9.66275	9.6773	9.78175	10.0977	9.75832	9.81236	9.865	9.75604	9.79679	9.71012
net	0.0883473	0.0118182	24	0	0.125717	3.90809	3.86544	3.96676	3.85032	3.73685	3.74538	3.62772	3.60766	3.88174	3.86252	3.95406
CG3568	0.0883473	0.0118182	18	9	0.12549	2.78131	2.81502	2.76687	2.99161	3.0784	2.9812	2.89866	2.90145	2.96996	2.89254	2.97934
pan	0.0883473	0.0118182	24	21	0.125461	3.91911	3.91693	3.87661	3.74874	3.27349	3.78122	3.69592	3.77166	3.94583	3.86999	4.14001
CG4221	0.0883473	0.0118182	24	12	0.125324	2.00301	2.06247	1.99312	2.18234	2.12288	2.20731	2.24285	2.20099	1.94082	2.06897	2.03217
CG33635	0.0883473	0.0118182	18	6	0.125309	2.77028	2.76422	2.86605	3.13717	3.26832	2.86322	2.73566	2.79632	3.12605	2.95461	3.01448
ry	0.0883473	0.0118182	24	18	0.12526	4.02298	3.9827	3.90632	3.94543	3.91748	4.00042	4.05803	3.99165	4.21222	4.35634	4.32667
sfl	0.0883473	0.0118182	24	21	0.125156	3.45814	3.39849	3.47269	3.40587	3.09852	3.42977	3.38979	3.39765	3.68216	3.58072	3.65184
CG10970	0.0883473	0.0118182	24	6	0.125002	2.1445	2.13533	2.22424	2.12733	2.22293	2.03795	2.12704	2.0468	1.92282	1.93473	2.01484
CG6770	0.0883473	0.0118182	18	6	0.124935	10.3192	10.2765	10.2891	10.4725	10.581	10.3356	10.1672	10.177	10.4197	10.3838	10.5243
CG42495	0.0883473	0.0118182	18	9	0.124159	2.87182	2.88304	2.79013	2.98251	3.37329	2.93419	2.98062	3.10978	2.90379	2.89813	3.00866
Aats-asp	0.0883473	0.0118182	18	9	0.122971	5.09119	5.0573	5.12847	5.32815	5.3524	5.14521	5.21783	5.27572	5.16244	5.17713	5.26708
l(2)05714	0.0883473	0.0118182	18	6	0.122389	3.12053	3.11396	3.0541	3.28302	3.23244	2.8836	2.95983	2.99548	3.01371	3.12663	3.26123
CG30344	0.0883473	0.0118182	24	12	0.122221	4.48682	4.47096	4.50666	4.6165	4.66682	4.73266	4.65686	4.68878	4.37151	4.57813	4.57224
CG33138	0.0883473	0.0118182	24	3	0.121395	7.16668	7.10708	7.24875	6.94881	6.96614	6.89768	6.83355	6.88714	6.87899	6.85233	6.90226
CG13377	0.0883473	0.0118182	24	9	0.12133	3.30099	3.22267	3.14232	3.34691	3.34445	3.39496	3.3123	3.29541	2.90163	3.12306	3.21543
Sin1	0.0883473	0.0118182	24	0	0.121284	3.14487	3.18454	3.19833	3.0093	3.13139	2.98955	2.96302	2.96084	3.1388	2.98166	3.17728
CG15745	0.0883473	0.0118182	18	15	0.121261	3.90298	3.9542	3.86253	3.78535	3.69983	4.0762	4.0771	4.04679	3.71068	3.53734	3.73256
Vinc	0.0883473	0.0118182	18	9	0.121197	4.52066	4.56176	4.52802	4.75053	4.68401	4.69763	4.79933	4.654	4.6355	4.66642	4.56472
E2f2	0.0883473	0.0118182	18	6	0.121044	3.77284	3.82381	3.86762	3.93644	3.96342	3.63811	3.59871	3.6023	3.80919	3.85834	3.94976
CG8785	0.0883473	0.0118182	18	12	0.12077	2.85772	3.00402	2.82588	3.17001	3.21228	3.21844	3.31797	3.0325	2.61366	2.8591	2.56783
CG5857	0.0883473	0.0118182	18	6	0.120529	2.5388	2.67941	2.66608	2.91715	2.83489	2.65392	2.57771	2.58294	2.76301	2.83774	2.80242
Crc	0.0883473	0.0118182	18	9	0.119925	7.92127	8.01845	7.92688	8.21188	8.36191	8.08667	8.00402	8.07174	7.94317	7.95311	7.97527
Vps16B	0.0883473	0.0118182	18	6	0.11987	3.22706	3.21571	3.09245	3.3973	3.38452	3.10072	3.22169	3.1245	3.26346	3.35075	3.37875
CG13893	0.0883473	0.0118182	24	12	0.119674	3.92737	4.06854	3.84145	4.07567	4.07536	4.21733	4.21886	4.15537	3.90851	4.05281	3.99764
CG12404	0.0883473	0.0118182	18	9	0.119519	4.74061	4.7738	4.77982	5.01622	5.07652	4.86766	4.88147	4.83505	4.84225	4.82116	4.88204
Irc	0.0883473	0.0118182	24	21	0.119236	6.35252	6.40405	6.32388	6.06273	6.12831	6.30661	6.33559	6.28176	6.33257	6.46214	6.52273
CG8713	0.0883473	0.0118182	24	15	0.118609	2.01077	1.91928	1.9579	2.12846	2.12563	2.23576	2.33857	2.14192	2.08484	2.15085	2.21475
Cp110	0.0883473	0.0118182	18	9	0.117982	1.90945	1.92064	1.83601	2.09236	2.10028	2.07639	2.05791	1.92613	1.8418	2.05066	2.03289
RpL23	0.0883473	0.0118182	18	9	0.117922	10.203	10.2071	10.2145	10.3395	10.5746	10.3124	10.3441	10.408	10.3343	10.3137	10.2627
Taf6	0.0883473	0.0118182	18	9	0.117342	3.44024	3.45811	3.48376	3.69228	3.73422	3.51334	3.6146	3.56519	3.48575	3.58111	3.60363
CG13743	0.0883473	0.0118182	24	21	0.116591	3.47215	3.46897	3.41814	3.31753	2.95997	3.34694	3.25516	3.32521	3.52205	3.37171	3.47955
cdi	0.0883473	0.0118182	24	18	0.116007	4.69443	4.74243	4.62421	4.72208	4.33339	4.8434	4.8678	4.78004	4.84136	4.86937	4.89806
CG7016	0.0883473	0.0118182	24	9	0.116001	4.45613	4.57212	4.43846	4.59549	4.8072	4.52602	4.6284	4.57662	4.3098	4.46954	4.30838
tra2	0.0883473	0.0118182	18	6	0.115778	3.523	3.56918	3.46074	3.74564	3.74261	3.56084	3.46581	3.49215	3.57574	3.61098	3.72512
Pak	0.0883473	0.0118182	24	18	0.115457	4.64216	4.6275	4.56614	4.58911	4.37188	4.7487	4.80622	4.68673	4.70639	4.75161	4.83263
Sip1	0.0883473	0.0118182	24	12	0.11465	5.3084	5.40064	5.37643	5.54599	5.55603	5.63777	5.52051	5.55891	5.37234	5.51306	5.43344
Mipp1	0.0883473	0.0118182	24	0	0.114527	6.76282	6.69448	6.72602	6.59618	6.61048	6.50682	6.45158	6.4655	6.61624	6.76196	6.55763
CG11555	0.0883473	0.0118182	18	6	0.114424	3.64924	3.53912	3.65029	3.74733	3.80644	3.48268	3.56339	3.49201	3.70364	3.55951	3.66977
Rrp46	0.0883473	0.0118182	18	6	0.114383	2.64243	2.60085	2.64709	2.71518	2.93869	2.48361	2.47123	2.52128	2.78235	2.96099	2.83623
beta3GalTII	0.0883473	0.0118182	18	6	0.113989	2.76682	2.6466	2.697	2.89837	2.81344	2.55494	2.58853	2.62058	2.7436	2.70313	2.66183
Trn	0.0883473	0.0118182	24	21	0.113947	4.79487	4.69748	4.71773	4.6485	4.1904	4.67029	4.56958	4.55086	4.75906	4.73772	4.82622
CG43462	0.0883473	0.0118182	24	21	0.113939	2.93653	2.98168	3.00164	2.83893	2.58306	2.82285	2.84477	2.84331	3.11558	3.02919	2.9178
CG30499	0.0883473	0.0118182	24	9	0.113375	4.98191	4.94469	4.97268	5.14515	5.28812	4.97687	5.01943	4.96988	4.75817	4.96057	4.83015
lap	0.0883473	0.0118182	24	21	0.113057	4.91588	4.86918	4.8894	4.76357	4.44193	4.81811	4.75406	4.7935	4.98917	4.86474	5.01234
CG3552	0.0883473	0.0118182	18	6	0.113022	3.67563	3.61361	3.49036	3.84	3.82844	3.59522	3.57031	3.57206	3.76791	3.65905	3.82474
Dic1	0.0883473	0.0118182	24	6	0.112556	5.80253	5.78192	5.75556	5.86293	5.88548	5.59238	5.64269	5.74195	5.58222	5.72506	5.66614
CG7441	0.0883473	0.0118182	24	0	0.112348	4.32731	4.38081	4.31335	4.21677	4.2307	4.1175	4.22564	4.04641	4.29472	4.2665	4.42896
CG16857	0.0883473	0.0118182	24	6	0.111957	4.99021	5.19949	5.12497	5.11438	5.14305	5.07158	4.98395	4.9674	4.93038	4.92516	4.96252
CG10741	0.0883473	0.0118182	24	15	0.11192	3.32752	3.25308	3.35402	3.46405	3.4754	3.55852	3.62557	3.61353	3.47004	3.60604	3.42164
Ggt-1	0.0883473	0.0118182	18	12	0.111464	4.6804	4.71475	4.6677	4.70119	4.69711	4.82197	4.9548	4.87371	4.3935	4.6877	4.41612
CG43901	0.0883473	0.0118182	18	0	0.111284	2.26451	2.19913	2.21772	2.06137	1.79235	2.0476	2.08441	2.14788	2.34209	2.18534	2.15696
CG13901	0.0883473	0.0118182	18	6	0.110677	2.68304	2.8566	2.847	2.94926	3.02311	2.81192	2.67955	2.69447	2.95531	2.88326	2.95007
CG4723	0.0883473	0.0118182	24	18	0.110226	3.50516	3.46662	3.53373	3.49554	3.44752	3.62282	3.61747	3.60838	3.59749	3.72962	3.7475
aru	0.0883473	0.0118182	24	9	0.109981	4.45935	4.45769	4.47448	4.54327	4.60412	4.56664	4.50323	4.45124	4.25623	4.34582	4.22313
Dscam4	0.0883473	0.0118182	18	0	0.109756	2.29594	2.28085	2.30091	2.13137	1.78956	2.21229	2.13566	2.22447	2.46184	2.26697	2.2912
CG30379	0.0883473	0.0118182	24	6	0.10954	1.47222	1.28689	1.3511	1.36578	1.64145	1.33673	1.22946	1.35317	1.22564	1.22741	1.10795
RpS13	0.0883473	0.0118182	18	9	0.109451	9.80272	9.84193	9.82352	9.98065	10.2346	9.93442	9.91067	9.99437	9.94263	9.92813	9.88841
colt	0.0883473	0.0118182	24	3	0.109434	6.94767	6.88891	6.9659	6.83244	6.96608	6.63068	6.75147	6.75232	6.78789	6.87707	6.8084
CG10623	0.0883473	0.0118182	24	9	0.109138	4.72421	4.81302	4.88797	4.93846	4.96044	4.82876	4.79307	4.87229	4.6318	4.57851	4.71325
CG34117	0.0883473	0.0118182	18	9	0.109071	7.12667	7.12711	7.09209	7.24225	7.57415	7.18272	7.29187	7.22385	7.27769	7.17769	7.14835
Aats-ser	0.0883473	0.0118182	18	3	0.108862	3.63097	3.68731	3.64144	3.61632	3.55209	3.38616	3.45934	3.53437	3.69233	3.61614	3.69944
CG12851	0.0883473	0.0118182	24	21	0.108603	2.6573	2.52896	2.59416	2.43882	2.15747	2.53115	2.45706	2.50955	2.72073	2.53359	2.62834
CG3626	0.0883473	0.0118182	18	0	0.108573	5.70316	5.74193	5.69171	5.56623	5.36071	5.58302	5.68966	5.53301	5.62966	5.65356	5.66729
Ssdp	0.0883473	0.0118182	24	21	0.108569	4.49578	4.46732	4.38152	4.34472	3.95055	4.40358	4.34716	4.23883	4.4983	4.44289	4.56353
CG7556	0.0883473	0.0118182	18	9	0.108202	4.50117	4.42202	4.45168	4.65463	4.66599	4.57225	4.61472	4.59052	4.49301	4.63143	4.53769
rdgBbeta	0.0883473	0.0118182	18	3	0.107517	3.1401	3.12376	3.23586	3.05897	3.29536	2.99655	3.02316	3.00615	3.4186	3.25441	3.52394
CG13667	0.0883473	0.0118182	18	3	0.107096	2.55936	2.59651	2.46157	2.56297	2.55722	2.35525	2.44337	2.31405	2.64854	2.57292	2.72709
Nsun2	0.0883473	0.0118182	18	6	0.106326	3.06858	3.13947	3.02065	3.23733	3.17673	2.97842	2.96203	3.01541	3.26713	3.18835	3.192
Lin29	0.0883473	0.0118182	24	21	0.105964	3.03446	3.03278	3.10111	2.95201	2.75636	3.0088	2.90217	2.94075	3.18878	3.05279	3.10034
eIF-3p40	0.0883473	0.0118182	18	9	0.105317	6.84393	6.82398	6.86446	7.01605	7.19434	6.88159	6.91418	6.99023	6.892	6.97151	6.89027
Nhe2	0.0883473	0.0118182	24	21	0.105256	4.22866	4.1109	4.24012	4.1119	3.64129	4.18513	4.08119	4.17455	4.42808	4.24096	4.33537
CG6966	0.0883473	0.0118182	18	0	0.105254	5.37356	5.42002	5.40499	5.2483	5.00139	5.3275	5.36095	5.22847	5.36291	5.29685	5.4005
skpA	0.0883473	0.0118182	18	9	0.105114	5.87656	5.91558	5.85991	6.02442	6.14142	6.05735	6.026	5.95619	5.97641	5.91783	6.01235
jeb	0.0883473	0.0118182	24	21	0.104686	2.38367	2.34782	2.34665	2.17851	1.97704	2.26272	2.23595	2.2177	2.42686	2.285	2.36942
CG30185	0.0883473	0.0118182	18	6	0.104628	4.37882	4.34409	4.32897	4.53239	4.61809	4.33983	4.24486	4.39003	4.53094	4.49738	4.45629
ken	0.0883473	0.0118182	24	9	0.104561	3.41918	3.3514	3.32085	3.50164	3.39423	3.43815	3.47464	3.44815	3.28139	3.26557	3.1845
CG5168	0.0883473	0.0118182	18	9	0.104441	5.38432	5.39557	5.36426	5.54278	5.68402	5.53251	5.45406	5.46383	5.39585	5.527	5.53182
CG30273	0.0883473	0.0118182	24	15	0.104179	4.16877	4.34559	4.20855	4.35289	4.40693	4.50005	4.49017	4.45157	4.38074	4.45086	4.51875
EcR	0.0883473	0.0118182	24	18	0.104134	2.7391	2.66726	2.69782	2.70855	2.3446	2.77255	2.72988	2.73758	2.88675	2.86512	2.93023
CG32626	0.0883473	0.0118182	18	9	0.104038	5.4483	5.44147	5.48464	5.63354	5.62323	5.57991	5.63	5.56595	5.46461	5.5289	5.58442
CG8481	0.0883473	0.0118182	24	9	0.103746	5.50459	5.40754	5.35109	5.56856	5.69708	5.53184	5.46641	5.46083	5.42206	5.33858	5.31948
CG6983	0.0883473	0.0118182	18	3	0.103126	4.90868	4.94041	4.95238	5.03138	4.88857	4.79756	4.67097	4.8171	5.0098	5.1146	5.16026
al	0.0883473	0.0118182	24	12	0.102923	1.46552	1.51399	1.47205	1.57256	1.60822	1.71924	1.69002	1.68018	1.53792	1.65336	1.47119
Mrp4	0.0883473	0.0118182	18	15	0.102849	3.76635	3.75673	3.73794	3.67698	3.45842	3.88001	3.9351	3.75832	3.51121	3.60093	3.5444
CG1140	0.0883473	0.0118182	24	6	0.1028	4.49295	4.52214	4.63177	4.55112	4.74424	4.41513	4.4758	4.52821	4.34746	4.44514	4.37
CG9411	0.0883473	0.0118182	24	9	0.102307	1.79133	1.733	1.64688	1.83146	1.89905	1.74527	1.7857	1.83071	1.60875	1.66333	1.66451
Tm1	0.0883473	0.0118182	24	9	0.102209	6.33867	6.33464	6.33386	6.47319	6.55143	6.36042	6.33328	6.33836	6.18911	6.19891	6.18821
CG8312	0.0883473	0.0118182	18	15	0.102139	5.03463	5.07887	5.04879	4.99968	4.90347	5.23518	5.26321	5.17457	4.93892	4.98985	4.86914
Pal2	0.0883473	0.0118182	24	21	0.102049	5.37517	5.30145	5.32561	5.16586	5.16672	5.29154	5.16989	5.21746	5.43063	5.29859	5.36255
CG43129	0.0883473	0.0118182	24	3	0.101829	3.24772	3.27745	3.2873	3.1258	3.21229	3.04367	3.10967	3.07381	3.06537	3.16096	3.10275
[truncated: 9,175 more rows]

## Sheet: JTK results for O1
Probeset - O1	BHQ	ADJP	PER	LAG	AMP	ZT0O1A	ZT0O1B	ZT0O1C	ZT6O1A	ZT6O1B	ZT6O1C	ZT12O1A	ZT12O1B	ZT12O1C	ZT18O1A
[truncated: 10,391 more rows]
