# Supplementary material for: Circadian gene variants and the skeletal muscle circadian clock contribute to the evolutionary divergence in longevity across Drosophila populations
Source: HighWire-hosted journal article supplement (doi:10.1101/gr.246884.118), 2019-06-27
Supplement: Supplemental_Table_S8.xlsx [file Supplemental_Table_S8.xlsx]

## Sheet: Legend
Supplemental Table S8
RNA-seq of skeletal muscle with timeless overexpression versus controls. LogFC (Log fold-change) is indicated with p values.

## Sheet: Sheet1
Gene expression changes induced in skeletal muscle by timeless overexpression
(comparison of Mhc>timOE versus Mhc>+)
gene	logFC	AveExpr	t	PValue	score = -log10(Pvalue)	adjPVal	B
fd64A	6.86727	-2.44021	12.7646	1.93384e-08	7.71358	5.72294e-06	4.21186
CG4650	5.5119	0.00134531	19.4981	1.36058e-10	9.86628	1.5107e-07	9.69788
w	5.22812	2.66598	24.9945	6.96745e-12	11.1569	3.48129e-08	13.4797
ppk13	4.48704	-2.14885	9.79385	3.78113e-07	6.42238	3.8556e-05	4.147
CG5767	3.23015	-1.9785	0.654554	0.524855	0.27996	0.70608	-5.1601
CG12506	3.12105	-0.884078	3.85942	0.00218972	2.65961	0.0179802	-1.21166
CG33282	3.05594	-3.96637	1.27206	0.226971	0.644029	0.42318	-4.6585
Ssl2	2.80905	0.0762913	10.3277	2.10717e-07	6.6763	2.55334e-05	6.23467
CG9682	2.76991	-1.76368	0.728813	0.47982	0.318922	0.670513	-5.14186
Cyp12d1-d	2.70298	2.45818	13.3072	1.19901e-08	7.92118	4.27916e-06	10.3127
CG5770	2.62408	-3.38061	1.07738	0.302073	0.519888	0.509729	-4.85749
CG6912	2.41541	3.65118	12.9879	1.58517e-08	7.79992	5.16258e-06	10.0943
Jon99Fii	2.2057	-1.04613	0.53918	0.599427	0.222264	0.759872	-5.31523
GluRIIC	2.2008	3.50159	21.3345	4.65229e-11	10.3323	9.29808e-08	15.9033
CG3290	2.09916	1.18918	0.464248	0.650613	0.186677	0.794805	-5.66553
Ntl	2.04366	0.53739	3.36626	0.00546128	2.26271	0.0340144	-2.0821
CG7900	2.02918	3.26623	9.73345	4.04615e-07	6.39296	4.01278e-05	6.96588
prom	2.01635	-0.727777	3.56239	0.00378954	2.42141	0.0264307	-1.69585
CG18446	1.99213	0.881864	6.89464	1.49498e-05	4.82536	0.000529197	3.31859
CG33258	1.94584	0.391679	0.554384	0.589296	0.229667	0.753047	-5.83781
CG31029	1.90772	1.19011	1.3883	0.189778	0.721753	0.376132	-5.34968
CR32027	1.90383	-0.528869	6.06337	5.17093e-05	4.28643	0.0012187	2.04522
salt	1.84201	1.74231	0.611984	0.55174	0.258266	0.7269	-5.77249
CG13311	1.84054	-1.07204	0.760418	0.461392	0.33593	0.655426	-5.13587
CG13461	1.80104	0.417597	2.62061	0.0220414	1.65676	0.0894055	-3.73999
Uro	1.79666	1.4727	0.62311	0.54464	0.263891	0.721446	-5.82385
CG3285	1.72087	0.519299	0.594772	0.562822	0.249629	0.735008	-5.45939
CG43402	1.66585	3.45814	11.9339	4.16482e-08	7.3804	9.24869e-06	9.18068
CR10102	1.66506	-1.69685	2.52037	0.0265447	1.57602	0.101828	-3.28363
CG2187	1.64741	0.420968	0.597785	0.560874	0.251135	0.733038	-5.46855
cad	1.64356	0.426434	0.717002	0.486821	0.312631	0.675924	-5.50167
CG13946	1.64348	-0.346794	3.61912	0.00341092	2.46713	0.0246197	-1.77546
CG34456	1.62693	-0.943029	3.03804	0.0100989	1.99573	0.0521003	-2.51115
CG9259	1.61635	2.63893	0.441401	0.666614	0.176126	0.805901	-6.00106
tim	1.59499	6.87316	27.8869	1.86188e-12	11.73	1.86058e-08	19.1089
CG8028	1.58634	0.57439	0.757776	0.462915	0.334498	0.656199	-5.4571
PH4alphaSG2	1.57172	-0.54202	5.25761	0.000188584	3.7245	0.00298183	0.971751
CG6602	1.56389	1.57076	0.461311	0.65266	0.185313	0.796049	-5.6832
CG7882	1.55546	1.72346	0.399139	0.696662	0.156978	0.8274	-5.78178
Jon65Ai	1.54325	-2.23549	0.605749	0.55574	0.255128	0.729094	-5.17467
CG8072	1.53616	-0.388406	3.74846	0.00268542	2.57099	0.0208026	-1.37983
Cyp12d1-p	1.53615	3.25086	10.1277	2.61557e-07	6.58243	2.93678e-05	7.34114
CG18404	1.5122	0.619642	0.332806	0.744908	0.127897	0.856024	-5.66101
CG43968	1.51148	-1.36516	0.73524	0.476036	0.32236	0.666813	-5.09778
CG33468	1.49524	0.159408	6.57071	2.39797e-05	4.62016	0.00073281	2.96375
CR43928	1.48638	1.06159	6.95795	1.36529e-05	4.86478	0.000499756	3.53691
squ	1.46968	1.15295	6.63216	2.19005e-05	4.65955	0.000692263	3.08286
CG16727	1.46581	0.642182	0.481902	0.638371	0.194927	0.786106	-5.55416
CG9702	1.4634	1.03992	0.957304	0.356928	0.447419	0.562135	-5.65041
CG10073	1.43881	2.35738	17.5736	4.66396e-10	9.33125	3.58515e-07	13.4239
CR13656	1.4164	0.335524	0.645655	0.530413	0.275386	0.710797	-5.50945
GstE10	1.39479	-0.10798	0.943355	0.363735	0.439215	0.567584	-5.30604
NaPi-T	1.36878	3.10275	1.03411	0.321072	0.493397	0.529409	-6.24858
Jon99Fi	1.35571	-2.03449	0.406242	0.691572	0.160162	0.823803	-5.41203
CG34043	1.3491	1.12191	0.657782	0.522848	0.281624	0.704752	-5.78911
CG5999	1.34888	1.46538	9.03433	9.08626e-07	6.04161	6.99551e-05	6.15248
CG18563	1.34484	0.787851	2.45205	0.0301135	1.52124	0.111165	-3.61984
Cyp6a18	1.33124	0.222178	0.315396	0.75777	0.120463	0.864034	-5.47661
CG33511	1.32134	0.0463907	0.797678	0.440248	0.356303	0.636856	-5.45606
CG17110	1.31425	0.120244	0.789002	0.445115	0.351528	0.641206	-5.43883
CG17571	1.30904	-2.07193	0.325869	0.750023	0.124925	0.859319	-5.25176
CG16959	1.2907	-0.541439	4.41821	0.000798449	3.09775	0.00857025	-0.288807
CG13947	1.28313	7.82401	5.19989	0.000207622	3.68273	0.00320179	0.0256152
Hsp70Aa	1.2632	3.26901	7.61748	5.46749e-06	5.26221	0.000267319	4.18978
CG5160	1.25491	2.08943	11.7586	4.92516e-08	7.30758	1.0195e-05	9.03749
CG14195	1.23727	-0.957454	0.498248	0.627135	0.202639	0.7771	-5.27047
Pbprp5	1.23258	-0.00765362	2.26587	0.0423394	1.37326	0.140471	-4.27128
CG13036	1.23193	-1.04722	5.68732	9.35202e-05	4.02909	0.00182173	1.67596
CG15408	1.22609	0.641331	0.354882	0.728713	0.137443	0.845175	-5.53088
CG33926	1.20216	7.09608	6.04017	5.36042e-05	4.2708	0.00124285	1.40299
CG32198	1.20117	-0.949667	1.22193	0.244728	0.611317	0.44368	-5.60575
CG15534	1.192	0.262863	0.921123	0.374772	0.426232	0.578305	-5.63075
Mur18B	1.18866	5.38245	0.524018	0.609617	0.214943	0.767382	-6.99929
CG4842	1.18193	0.590801	3.70614	0.00290359	2.53706	0.0220651	-1.51406
Gyc32E	1.162	0.945837	7.08007	1.14774e-05	4.94015	0.000442834	3.70812
CG6472	1.15847	-0.433342	4.08117	0.00146142	2.83523	0.0132884	-0.841885
CG7179	1.158	-0.016537	4.43192	0.000779274	3.10831	0.00840959	-0.265058
Psf1	1.15754	0.369362	5.31125	0.00017253	3.76314	0.00278528	1.12375
CG34284	1.14455	0.0346434	0.539204	0.599411	0.222276	0.759872	-5.5209
Os-E	1.11747	-0.897811	0.752335	0.466062	0.331556	0.658683	-5.93858
CG1774	1.11136	6.82377	22.5174	2.43921e-11	10.6128	6.63062e-08	16.5922
CG14644	1.10442	-0.0316501	2.87388	0.0137372	1.8621	0.0642675	-2.92867
CG16898	1.0957	6.40281	12.3051	2.9398e-08	7.53168	6.99463e-06	9.30096
st	1.07422	1.04695	0.726647	0.481099	0.317765	0.671269	-5.80408
Hsp70Ab	1.07368	3.39842	7.53696	6.09617e-06	5.21494	0.000289993	4.03333
CG7329	1.06845	-0.246398	3.40411	0.00508854	2.29341	0.0324919	-2.2454
Lsp2	1.06785	8.0304	4.5676	0.000613433	3.21223	0.00704602	-1.13343
CG31373	1.06303	2.16659	0.992724	0.340051	0.468456	0.546628	-6.02022
lectin-28C	1.05583	7.47305	13.7257	8.38932e-09	8.07627	3.81066e-06	10.6189
Cry	1.05486	-2.56106	0.599348	0.559864	0.251917	0.732102	-5.19632
CG14245	1.03431	2.20059	0.506536	0.621475	0.206576	0.773978	-6.17805
CR43651	1.01758	0.170536	6.22011	4.06289e-05	4.39116	0.00103639	2.49795
ChLD3	1.00575	0.286239	5.28581	0.000179957	3.74483	0.00288653	1.08983
Gr98a	0.998056	-1.66378	0.512303	0.617551	0.209327	0.77217	-5.26954
CG7509	0.982077	1.28988	4.38544	0.000846298	3.07248	0.00889281	-0.462844
insv	0.982004	3.68589	11.7611	4.9133e-08	7.30863	1.0195e-05	8.93525
CG17752	0.962331	1.33728	0.350088	0.732219	0.135359	0.847372	-5.79788
CG32023	0.956102	0.515721	0.342941	0.737457	0.132264	0.850872	-5.58031
Hsp70Bb	0.951459	2.91451	6.85288	1.58765e-05	4.79925	0.000550881	3.18734
CG8112	0.937392	5.96857	7.71652	4.7875e-06	5.31989	0.00024285	3.93428
CG18477	0.935993	1.27371	6.38875	3.14621e-05	4.50221	0.000871737	2.7407
Thor	0.920515	9.00876	7.33087	8.08364e-06	5.09239	0.000345213	3.44173
laza	0.91145	3.89359	9.6872	4.26253e-07	6.37033	4.09571e-05	6.74523
mthl3	0.911203	2.35213	5.69871	9.18294e-05	4.03702	0.00181713	1.54362
CG6300	0.908908	-0.726093	0.39439	0.700074	0.154856	0.829512	-5.34998
CG7214	0.90339	-0.523365	4.23331	0.00111064	2.95443	0.0108174	-0.632557
RNaseMRP:RNA	0.897559	0.363029	3.67867	0.00305481	2.51502	0.0228493	-1.61437
CR43973	0.89427	1.47623	6.91469	1.45255e-05	4.83787	0.000522135	3.48306
swi2	0.885289	0.774727	1.24852	0.235177	0.628605	0.432804	-5.42732
Est-P	0.873066	1.61548	4.0552	0.00153191	2.81477	0.0137789	-1.24104
Gr64f	0.846447	-0.679558	4.23023	0.00111681	2.95202	0.0108284	-0.592115
CG18095	0.839314	0.952526	0.443936	0.66483	0.177289	0.804625	-5.73922
CG13616	0.837793	0.517473	6.24846	3.8909e-05	4.40995	0.0010073	2.52257
ninaB	0.832317	2.07809	5.41522	0.00014537	3.83753	0.00249326	1.06506
CG8791	0.828888	0.22707	0.622102	0.545281	0.26338	0.721721	-5.8754
CG4398	0.825885	2.79241	6.65139	2.12897e-05	4.67183	0.000679705	2.87133
Cpr49Ae	0.804197	6.5197	11.31	7.64037e-08	7.11689	1.29407e-05	8.29308
CG43179	0.803266	-0.765476	1.27203	0.226984	0.644005	0.42318	-4.91929
CG3690	0.803141	0.787455	0.358511	0.726064	0.139025	0.844146	-5.81491
CG34426	0.797243	0.441077	0.296873	0.771538	0.112643	0.871799	-5.58676
CG7084	0.796892	4.61662	1.53258	0.150791	0.821624	0.324264	-6.32223
Smvt	0.794879	1.58303	0.219917	0.829558	0.0811532	0.909465	-5.89323
CG14102	0.793543	3.08594	8.82643	1.16648e-06	5.93312	8.15149e-05	5.79722
Irk3	0.792157	3.49714	1.50002	0.158938	0.798773	0.336354	-6.069
CG9444	0.782747	0.292799	2.36881	0.0350893	1.45483	0.123424	-3.82188
CG42272	0.782736	1.87561	4.83639	0.000384508	3.41509	0.00499488	0.134277
Nmdmc	0.782469	5.75289	3.82497	0.00233268	2.63215	0.0188443	-2.52663
mre11	0.777341	3.74416	11.5457	6.05524e-08	7.21787	1.0676e-05	8.69442
zye	0.776987	0.549167	3.34698	0.00566162	2.24706	0.0348807	-2.17117
CG10006	0.776617	3.11065	1.73845	0.107182	0.96988	0.258981	-5.61262
Prx2540-2	0.772667	4.04428	7.7084	4.83969e-06	5.31518	0.00024303	4.05156
aur	0.766801	1.04655	2.9969	0.0109087	1.96223	0.0549448	-3.07302
CG7860	0.76358	0.594629	1.27492	0.225993	0.645906	0.422199	-5.30583
CG5830	0.763058	7.62439	10.8086	1.27019e-07	6.89613	1.76292e-05	7.78022
CG2076	0.757782	9.41652	14.0758	6.26887e-09	8.20281	3.13224e-06	10.9551
CG13309	0.751512	1.64795	0.190714	0.851874	0.0696246	0.92275	-5.84135
CG7912	0.749931	1.25466	3.02441	0.0103603	1.98463	0.0530132	-2.95424
CG14285	0.749158	3.84621	7.47147	6.66436e-06	5.17624	0.000300049	3.82739
Spn47C	0.7406	5.34186	12.5437	2.36113e-08	7.62688	6.04994e-06	9.53689
CG10383	0.733856	6.95002	5.58249	0.000110708	3.95582	0.00202991	0.628186
CG15020	0.732098	-0.206031	3.99464	0.0017102	2.76695	0.014965	-0.98837
CG13183	0.726111	0.202345	3.62608	0.00336716	2.47274	0.0244535	-1.64577
CG18538	0.705102	0.582707	7.3174	8.23566e-06	5.0843	0.000348725	3.88372
CG9270	0.699739	0.716604	0.718675	0.485826	0.31352	0.674754	-5.80515
CG14292	0.696599	3.62446	0.292425	0.774856	0.110779	0.87414	-6.58047
TTLL3A	0.695732	0.210092	4.89864	0.00034556	3.46148	0.00461038	0.380488
CG31106	0.695312	1.38362	0.589988	0.565924	0.247242	0.73694	-6.00928
CG13836	0.693066	1.45466	2.08885	0.0582347	1.23482	0.172171	-4.51528
CG43678	0.69291	0.39706	2.43747	0.0309327	1.50958	0.113145	-3.9425
Muc11A	0.686128	4.04212	0.367268	0.719686	0.142857	0.841051	-6.80505
Cyp4d1	0.681122	3.36651	6.05135	5.26825e-05	4.27833	0.00123004	1.8092
Su(Ste):CR42418	0.680563	0.392257	1.63758	0.126927	0.896445	0.290599	-4.85082
CycJ	0.679463	0.0408026	3.83775	0.00227858	2.64234	0.0185271	-1.25203
scpr-A	0.676632	-0.258684	0.528984	0.60627	0.217334	0.764687	-5.82614
CG43680	0.674218	6.36471	1.98369	0.0701632	1.15389	0.196338	-5.86109
klhl10	0.673466	-1.88156	0.223667	0.826704	0.0826501	0.907531	-5.2414
CG9392	0.662413	-0.408021	0.389291	0.703744	0.152585	0.830972	-5.74128
Pen	0.658516	2.66304	0.460888	0.652955	0.185117	0.796249	-6.76237
CG18327	0.649931	2.61128	3.43231	0.00482777	2.31625	0.031105	-2.5567
CG11892	0.648041	4.15162	0.491154	0.632	0.199283	0.780761	-6.96639
CG12018	0.647693	2.12904	6.61129	2.25845e-05	4.64619	0.000700891	2.9285
CG12105	0.642642	7.0321	10.1437	2.57035e-07	6.59001	2.9188e-05	7.01659
CG30054	0.640882	-0.0620593	2.08015	0.0591443	1.22809	0.174088	-4.11343
CG33093	0.639847	1.07997	3.61521	0.00343568	2.46399	0.0247334	-1.93711
Cht4	0.63791	4.83678	1.18211	0.259602	0.585691	0.461767	-6.81519
CG7130	0.6337	2.95523	6.56183	2.42974e-05	4.61444	0.000738006	2.655
CG8343	0.633522	-0.213862	0.391716	0.701998	0.153664	0.830478	-6.08519
CG13641	0.632282	1.73457	2.56313	0.0245238	1.61041	0.0965208	-4.00566
Lsp1beta	0.630792	7.7563	3.85477	0.00220849	2.6559	0.0180749	-2.45762
CG11043	0.629203	1.12272	1.72767	0.109153	0.961965	0.262645	-4.93703
CG6639	0.627457	0.74082	0.259837	0.799306	0.0972871	0.88936	-5.78178
CG5646	0.626478	6.44074	12.8593	1.77672e-08	7.75038	5.54837e-06	9.82155
MFS3	0.625461	2.95731	5.03513	0.00027391	3.56239	0.00389911	0.32502
CG5010	0.623534	9.04097	8.15539	2.69474e-06	5.56948	0.000156561	4.58965
CG13144	0.615025	4.72569	9.38642	6.01049e-07	6.22109	5.17783e-05	6.23869
CG16713	0.612939	5.1486	8.80001	1.20448e-06	5.9192	8.30097e-05	5.4855
CG13905	0.612292	0.198279	0.167006	0.870091	0.0604354	0.933861	-5.51524
CG15406	0.6093	2.84894	0.22518	0.825553	0.0832553	0.907018	-6.22644
Hsp70Ba	0.608804	1.04206	3.0213	0.0104208	1.9821	0.0532117	-2.81777
Ugt37b1	0.607451	3.18027	1.22737	0.242752	0.614837	0.441355	-6.04308
CG5130	0.607034	3.33837	5.689	9.32684e-05	4.03027	0.00182173	1.23203
CG2656	0.605456	5.35107	7.10349	1.1104e-05	4.95452	0.000433446	3.09954
Jon66Ci	0.604341	-2.56787	0.210179	0.836983	0.0772832	0.912599	-5.28676
CG31272	0.603941	2.3731	0.581136	0.571688	0.242841	0.741257	-6.58767
EfTuM	0.60352	7.56985	12.3727	2.76177e-08	7.55881	6.73131e-06	9.37699
CG13694	0.602071	1.48574	4.40697	0.000814531	3.08909	0.00869697	-0.633603
CG34424	0.598077	5.81487	6.62263	2.22101e-05	4.65345	0.000692263	2.34107
CG4538	0.596393	9.22509	9.07307	8.67722e-07	6.06162	6.88186e-05	5.78471
CG5773	0.594968	6.27662	6.73138	1.89368e-05	4.72269	0.000626608	2.47965
CG8012	0.592985	6.2473	5.20296	0.000206562	3.68495	0.00319037	-0.0241356
CG10924	0.592962	6.53153	9.4869	5.35356e-07	6.27136	4.73434e-05	6.24115
CG17352	0.591974	3.37827	2.39716	0.0333119	1.4774	0.119614	-4.80901
CG15784	0.589615	7.29061	6.56568	2.41591e-05	4.61692	0.000736041	2.23814
CG10075	0.589424	6.59843	10.572	1.62547e-07	6.78902	2.10528e-05	7.49909
CG12868	0.587356	5.57772	10.5496	1.66434e-07	6.77876	2.10528e-05	7.50706
Ir8a	0.587234	0.415111	3.07554	0.00941299	2.02627	0.049638	-2.65978
CG34423	0.581564	7.81697	7.61164	5.51064e-06	5.2588	0.000267319	3.80886
CG42808	0.58111	8.12965	10.9643	1.08248e-07	6.96558	1.69019e-05	7.95683
CG10827	0.579386	-2.09247	0.240335	0.814046	0.089351	0.899266	-5.27699
CG40298	0.576539	1.49018	3.427	0.00487585	2.31195	0.031334	-2.18625
CG6723	0.575823	4.89517	10.1035	2.68557e-07	6.57096	2.98187e-05	7.07101
CG6726	0.575197	4.09952	0.860616	0.405981	0.391495	0.606604	-6.96214
Cyp301a1	0.575128	1.64236	4.97833	0.000301624	3.52053	0.00419465	0.465291
dmrt99B	0.572643	0.698307	2.77545	0.0165148	1.78213	0.0727016	-3.18588
CG10513	0.571148	5.43412	1.76083	0.103189	0.986365	0.252354	-6.1695
CG34406	0.565659	1.73492	6.23812	3.9527e-05	4.40311	0.00102065	2.42815
ex	0.562834	6.10185	7.71802	4.77793e-06	5.32076	0.00024285	3.93509
CG14329	0.56216	0.563624	2.89131	0.013296	1.87628	0.0628213	-3.20091
CG4970	0.562052	0.0788611	0.99866	0.33728	0.472009	0.544367	-5.77536
CG9313	0.562006	2.07345	1.72303	0.110012	0.95856	0.263506	-5.60325
CG31780	0.560839	1.28146	3.0582	0.00972426	2.01214	0.0505885	-2.89731
CG12264	0.555767	8.19694	13.773	8.06279e-09	8.09351	3.81066e-06	10.6757
Act88F	0.554923	7.52986	4.31837	0.000953714	3.02058	0.0097349	-1.60146
Osi8	0.55451	-0.436112	4.11869	0.00136544	2.86473	0.0127033	-1.11072
mRpL39	0.55444	3.97279	13.437	1.07219e-08	7.96973	4.09457e-06	10.48
CG43165	0.554393	0.55085	3.54185	0.00393697	2.40484	0.0271513	-1.88062
CG11044	0.552434	6.4547	10.8746	1.18661e-07	6.92569	1.73554e-05	7.83076
l(2)efl	0.551474	7.6845	5.11693	0.000238596	3.62234	0.00353503	-0.141139
CG32564	0.550674	0.330684	3.11661	0.00871542	2.05971	0.047052	-2.53176
CG33307	0.546935	5.28202	6.79676	1.72191e-05	4.76399	0.000585272	2.65769
CG2650	0.546624	1.04989	3.35881	0.00553776	2.25667	0.034308	-2.35139
Cyp4s3	0.546607	1.80862	3.1647	0.00796402	2.09887	0.0442874	-2.85186
CG10514	0.546584	4.75917	0.790432	0.444311	0.352313	0.64058	-7.04903
CG1544	0.545922	5.24678	5.39732	0.000149704	3.82477	0.00255289	0.354643
Obp83g	0.543014	0.661157	3.36956	0.00542765	2.26539	0.0338901	-2.1817
CG31259	0.542581	-1.23969	0.600362	0.55921	0.252425	0.731862	-5.48934
CG14445	0.540706	4.24854	8.08747	2.94111e-06	5.53149	0.000168911	4.5249
CG31296	0.538337	-0.113426	1.61739	0.131241	0.881931	0.296516	-4.86291
CG14185	0.537422	-1.26913	1.60157	0.134713	0.870591	0.301767	-4.92257
Hsp70Bbb	0.537097	2.39601	3.12918	0.00851235	2.06995	0.0462426	-3.01892
CG6733	0.535517	1.72244	0.308048	0.763222	0.117349	0.866789	-6.15905
vis	0.531402	2.34902	2.04201	0.0632932	1.19864	0.183024	-4.98877
CG32373	0.529987	3.22598	6.21969	4.06551e-05	4.39089	0.00103639	2.01938
CG9486	0.529728	1.67646	1.99464	0.0688232	1.16227	0.194142	-4.71026
CG9837	0.529586	5.11768	3.08891	0.00917994	2.03716	0.0487953	-3.86222
CG13722	0.528141	0.284376	3.05835	0.00972153	2.01227	0.0505885	-2.69037
CG17181	0.526136	6.29332	3.81837	0.00236115	2.62688	0.0190436	-2.54504
CG31728	0.525589	-0.259954	1.95587	0.0736766	1.13267	0.202824	-4.49486
CG17190	0.522722	1.36856	3.00939	0.0106563	1.97239	0.0540766	-3.0146
CG11110	0.521737	4.39409	12.7569	1.94716e-08	7.7106	5.72294e-06	9.83479
CR42860	0.520534	5.40278	7.10651	1.10569e-05	4.95637	0.000433299	3.07377
CG11882	0.518061	2.89356	6.62944	2.19884e-05	4.65781	0.000692263	2.7888
capaR	0.51376	-0.540128	0.533048	0.603538	0.219296	0.762858	-5.58313
CG42759	0.513099	0.311228	2.97329	0.0114026	1.943	0.0566331	-2.79342
Tret1-2	0.510297	1.94867	4.56049	0.000621136	3.20681	0.00710185	-0.41027
CG5404	0.510232	2.74594	5.14807	0.000226437	3.64505	0.00344937	0.429156
Obp44a	0.509623	6.54011	5.01481	0.000283507	3.54744	0.00400154	-0.356094
CG14688	0.509103	6.80931	5.89461	6.72969e-05	4.172	0.00147155	1.15021
CG15096	0.50625	8.08179	2.73209	0.0179079	1.74696	0.0765991	-4.53971
CG6972	0.505688	6.86792	9.16725	7.7627e-07	6.10999	6.35842e-05	5.85508
PHGPx	0.501396	9.20509	10.5248	1.70837e-07	6.76742	2.13396e-05	7.49768
frac	0.501032	3.42569	3.97999	0.00175649	2.75535	0.015221	-1.96281
CG17664	0.501005	2.47538	1.20737	0.250088	0.601907	0.449953	-6.27639
CG31174	0.500303	0.588958	1.50672	0.157231	0.803462	0.333944	-5.15948
CR43344	0.50019	1.02999	4.0793	0.00146638	2.83375	0.0133214	-1.04426
CG15864	0.499333	0.815518	2.24133	0.0442671	1.35392	0.14461	-4.19412
Mal-A5	0.497376	8.34286	14.2223	5.56007e-09	8.25492	2.92431e-06	11.0596
CG5597	0.497363	8.31	9.09225	8.48206e-07	6.0715	6.7809e-05	5.79231
CG7720	0.496936	8.61501	5.11667	0.000238698	3.62215	0.00353503	-0.130793
CR17025	0.495931	0.493923	3.82683	0.00232472	2.63363	0.0187953	-1.37529
Neurochondrin	0.495216	7.01208	6.64762	2.14079e-05	4.66943	0.000681304	2.35866
CheB38b	0.494018	2.74232	7.35522	7.81646e-06	5.10699	0.000338138	3.445
unc-13-4A	0.493704	4.09241	4.6656	0.000516804	3.28667	0.00615545	-0.715382
CG9172	0.491578	9.67744	8.30423	2.22858e-06	5.65197	0.000136627	4.80707
CG34215	0.489608	5.60319	6.49632	2.67812e-05	4.57217	0.000792997	2.14892
CG9836	0.489116	10.9063	10.8369	1.23365e-07	6.90881	1.74655e-05	7.87279
nimC1	0.487802	4.61158	3.86598	0.00216352	2.66484	0.0178678	-2.2541
CG31121	0.487241	3.2362	5.09726	0.000246627	3.60796	0.0036137	0.167749
CG15515	0.484024	1.92422	5.36141	0.000158815	3.79911	0.00263628	0.883878
Cyp318a1	0.483734	0.33843	3.28753	0.00632738	2.19878	0.037531	-2.29812
CG9616	0.482592	1.70316	2.60182	0.0228248	1.64159	0.0917858	-3.6469
CG34212	0.480912	9.21701	2.89778	0.0131358	1.88154	0.0622998	-4.18916
CG14946	0.480736	3.72257	4.91652	0.00033515	3.47476	0.00449551	-0.241765
GAPsec	0.479185	4.48205	7.56151	5.89672e-06	5.22939	0.000283298	3.84937
ncd	0.476521	2.1063	3.24863	0.00680534	2.16715	0.0395152	-2.85739
Cct1	0.475342	8.34532	7.12539	1.07666e-05	4.96792	0.000425259	3.11426
Spat	0.473711	6.88562	6.40118	3.08792e-05	4.51033	0.000864358	1.97331
salm	0.473646	5.51942	6.18924	4.25937e-05	4.37065	0.0010803	1.69524
CG4962	0.470275	-0.539824	1.41362	0.182381	0.739019	0.367153	-5.33637
Gk	0.469727	6.18691	4.00214	0.00168701	2.77288	0.0148037	-2.20145
CG42365	0.469453	3.9737	5.91024	6.56633e-05	4.18268	0.00145493	1.42004
cbc	0.464568	4.22381	8.88037	1.09282e-06	5.96145	7.85648e-05	5.65515
Smyd4	0.460736	3.48946	5.0049	0.000288313	3.54014	0.00405791	-0.0329099
CG9780	0.460709	7.15431	3.78306	0.00251956	2.59867	0.0199667	-2.60531
Oda	0.460172	12.0365	10.3217	2.12076e-07	6.67351	2.55334e-05	7.32356
CG17777	0.459659	1.1264	2.8481	0.0144164	1.84114	0.066297	-3.39205
CG17273	0.459336	8.26762	8.32257	2.17741e-06	5.66206	0.000134701	4.7968
Fmrf	0.457219	5.38804	3.7088	0.00288937	2.5392	0.0219904	-2.6802
CG13667	0.456863	3.295	5.10779	0.000242293	3.61566	0.00357641	0.239864
Oatp58Dc	0.456204	4.44025	1.21826	0.246072	0.608938	0.445309	-6.71316
CG18317	0.455275	8.46147	10.5507	1.66237e-07	6.77927	2.10528e-05	7.50841
CG17751	0.454401	1.32653	0.351803	0.730964	0.136104	0.846516	-6.14589
ics	0.453494	5.97863	12.9763	1.60152e-08	7.79547	5.16258e-06	9.93786
CG8854	0.453202	3.51361	3.3922	0.00520295	2.28375	0.0329487	-2.96202
CG34244	0.453137	0.246861	2.21392	0.0465185	1.33237	0.148517	-4.07285
CG7759	0.452731	5.76729	12.5994	2.24471e-08	7.64884	5.903e-06	9.59058
CG4461	0.452662	10.0034	10.9827	1.06229e-07	6.97376	1.69019e-05	8.01083
Paip2	0.451549	8.37381	4.54425	0.000639115	3.19442	0.00725759	-1.15496
CG16826	0.450173	12.847	3.2434	0.0068723	2.1629	0.039848	-3.46682
CG17018	0.448225	0.544343	2.04398	0.063073	1.20016	0.182586	-4.53595
Hsp26	0.447228	4.41911	4.35833	0.000888111	3.05153	0.00921872	-1.35999
Nlg1	0.446128	7.09302	7.40758	7.27329e-06	5.13827	0.000320573	3.49502
Spn31A	0.445739	5.3867	7.26294	8.88185e-06	5.0515	0.000369818	3.31891
CG17150	0.444931	1.89967	0.82306	0.426208	0.370378	0.624868	-6.54372
CG14186	0.444666	4.9506	5.46626	0.00013372	3.8738	0.00234844	0.492387
capt	0.44445	7.42511	8.20985	2.51311e-06	5.59979	0.0001486	4.63239
CG6125	0.44319	4.94764	3.58616	0.0036259	2.44058	0.0255707	-2.91459
nimB4	0.441503	3.71943	4.21656	0.00114457	2.94136	0.0110723	-1.44885
Cpr47Ea	0.441277	0.988111	2.77207	0.0166194	1.77938	0.0729051	-3.39228
lmd	0.439792	-0.0687255	1.33886	0.204936	0.688382	0.396654	-5.21138
CG15537	0.438726	3.62719	4.77865	0.000424751	3.37187	0.00534577	-0.425363
CG1983	0.438682	5.08181	11.1862	8.64616e-08	7.06318	1.41641e-05	8.21842
CG6385	0.438092	4.29415	3.16124	0.00801582	2.09605	0.0444518	-3.57186
vkg	0.43681	6.43251	4.80685	0.000404578	3.393	0.00520328	-0.726471
Rgk2	0.436531	3.40051	3.72742	0.00279172	2.55413	0.0214598	-2.27708
edl	0.43612	3.38085	3.78022	0.00253279	2.5964	0.0200397	-2.3192
CG10444	0.434795	5.77922	9.76337	3.91245e-07	6.40755	3.9492e-05	6.58323
CR43870	0.433158	3.05615	5.81743	7.60152e-05	4.1191	0.00159249	1.44508
CG30016	0.432489	0.313729	0.298006	0.770693	0.113119	0.871313	-5.81493
ade3	0.431772	7.87135	2.88174	0.0135364	1.8685	0.0635963	-4.26946
CG11659	0.430944	-0.64084	0.172801	0.86563	0.0626676	0.931135	-5.45248
CG11155	0.430514	7.47727	6.26943	3.76865e-05	4.42381	0.000983293	1.77906
CG42728	0.429731	0.022979	0.844866	0.414384	0.382597	0.613933	-6.0794
CG43110	0.429592	2.00179	3.225	0.00711324	2.14793	0.040852	-2.85969
CG17575	0.42905	-2.54668	0.114187	0.91094	0.0405101	0.953496	-5.21834
CG7429	0.427776	2.61511	4.49371	0.000698616	3.15576	0.0077312	-0.710211
CG8043	0.427566	6.11001	10.7951	1.28808e-07	6.89006	1.76326e-05	7.74262
shd	0.42749	2.38768	3.11387	0.00876033	2.05748	0.0471548	-3.24798
Uhg3	0.426339	3.509	6.09248	4.9432e-05	4.30599	0.0011903	1.8071
Pex3	0.425015	5.28797	9.37813	6.06844e-07	6.21692	5.18307e-05	6.15212
Pepck	0.424689	10.5138	4.97798	0.000301807	3.52027	0.00419465	-0.329243
CG4752	0.424524	5.37438	5.98919	5.80306e-05	4.23634	0.00132397	1.37352
CG32857	0.424438	6.08011	7.99041	3.33589e-06	5.47679	0.000187279	4.3124
Nelf-E	0.423692	3.74676	7.76342	4.4975e-06	5.34703	0.000233939	4.27353
CG2680	0.423356	3.60295	1.24596	0.236084	0.626933	0.434074	-6.495
CG6073	0.422897	3.35507	5.41485	0.000145459	3.83726	0.00249326	0.721324
Ance-3	0.42285	5.1332	4.30942	0.000969095	3.01363	0.00981299	-1.6028
CG10472	0.422363	3.09826	0.319068	0.755051	0.122024	0.862706	-7.01806
CG14005	0.421564	3.71543	7.00987	1.26788e-05	4.89692	0.000474529	3.15415
CR43845	0.42044	-0.522291	0.557333	0.58734	0.23111	0.751891	-5.64428
CG5171	0.419594	7.74018	6.06823	5.13216e-05	4.2897	0.00121675	1.45693
JhI-1	0.41944	4.24188	7.75997	4.51819e-06	5.34504	0.000233939	4.15906
CG3168	0.418763	7.441	1.28129	0.223818	0.650106	0.419469	-6.87786
nAcRbeta-21C	0.417603	5.08278	2.18208	0.0492705	1.30741	0.153335	-5.40672
Fmo-2	0.417499	6.04156	3.22779	0.00707607	2.15021	0.0407792	-3.64722
CG5377	0.417016	6.14397	7.2686	8.81226e-06	5.05491	0.000368456	3.28713
Ef1beta	0.415966	8.5528	7.34841	7.89028e-06	5.10291	0.00033986	3.45023
Gyc-89Da	0.415734	0.188973	2.51988	0.026569	1.57562	0.101843	-3.56857
Qtzl	0.415548	5.1971	6.42373	2.98512e-05	4.52504	0.000854736	2.06019
CG13117	0.414832	3.68707	4.01857	0.00163733	2.78586	0.0145052	-1.86743
CG42708	0.414743	6.39894	5.90773	6.59231e-05	4.18096	0.00145745	1.17214
Cyp28d2	0.414684	2.70219	5.74289	8.55733e-05	4.06766	0.00173643	1.46278
CG3198	0.412845	6.57687	6.14005	4.59355e-05	4.33785	0.00114472	1.54805
cenG1A	0.411586	7.29446	8.57307	1.59115e-06	5.79829	0.000104607	5.10507
GstS1	0.411313	8.4046	7.75357	4.55682e-06	5.34134	0.000234723	4.02034
Ciao1	0.410572	6.10545	11.5747	5.88612e-08	7.23017	1.0676e-05	8.56698
CG9236	0.41056	0.513948	2.76054	0.0169815	1.77003	0.0739093	-3.29145
CG34290	0.410495	3.04836	3.34586	0.00567341	2.24616	0.0349318	-3.00973
CG43679	0.409268	7.47224	2.51447	0.0268362	1.57128	0.102709	-4.93831
rogdi	0.409103	6.52135	8.74089	1.29443e-06	5.88792	8.71006e-05	5.30871
unc-45	0.40834	7.3843	5.61504	0.00010504	3.97865	0.00196447	0.69653
Aats-phe	0.408	7.43576	9.66541	4.36874e-07	6.35964	4.15498e-05	6.47329
mtg	0.407422	2.02917	3.23233	0.00701621	2.1539	0.0405746	-2.85351
CG34125	0.407106	4.57285	6.40238	3.08235e-05	4.51112	0.000864358	2.09066
CG31663	0.406404	5.07891	2.42868	0.0314372	1.50256	0.11457	-5.00383
CG33502	0.40639	6.10028	7.25376	8.99602e-06	5.04595	0.000369947	3.26637
CG18585	0.405617	-1.59087	0.145258	0.88687	0.0521398	0.942088	-5.40109
CG13623	0.405351	6.96042	9.02665	9.16979e-07	6.03764	6.99551e-05	5.68176
CG14352	0.404611	2.49932	4.24541	0.00108677	2.96386	0.0106367	-1.12753
CG32187	0.404426	2.14617	2.91149	0.0128028	1.8927	0.0613025	-3.51831
CG3499	0.402886	7.05537	11.2638	7.99982e-08	7.09692	1.33237e-05	8.24932
l(1)G0148	0.401431	5.91547	8.05669	3.06062e-06	5.51419	0.000173777	4.40623
scf	0.400933	5.27961	5.89669	6.70773e-05	4.17342	0.00147155	1.19814
CG7881	0.40082	1.08558	1.1425	0.275087	0.56053	0.479913	-5.90868
CG5569	0.400774	5.67853	9.03363	9.09387e-07	6.04125	6.99551e-05	5.69274
CG32335	0.400103	0.286423	1.11464	0.286398	0.543029	0.493105	-5.46434
XRCC1	0.399016	5.16462	6.62641	2.20866e-05	4.65587	0.000692263	2.37839
CG13897	0.398395	2.84495	4.20071	0.00117766	2.92898	0.0113158	-1.33323
Pgm	0.398192	8.69409	7.92582	3.62967e-06	5.44013	0.000197127	4.26554
alphaTub85E	0.397416	1.46235	2.84427	0.0145202	1.83803	0.0667126	-3.51398
CG9581	0.39682	5.89688	7.16045	1.02489e-05	4.98932	0.000410749	3.1335
Lk6	0.396591	11.7545	5.9981	5.723e-05	4.24238	0.0013117	1.44599
CG7277	0.395723	7.34552	6.97874	1.32536e-05	4.87766	0.000486925	2.87384
CG30098	0.395403	1.95276	1.9635	0.0726977	1.13848	0.201063	-5.25525
CG14687	0.395307	6.67171	8.84627	1.13879e-06	5.94356	8.11705e-05	5.45026
CG1537	0.395033	0.782061	1.78031	0.099824	1.00077	0.246785	-4.83762
CG13463	0.39503	0.224595	1.67765	0.118728	0.925448	0.277272	-5.21119
Mip	0.394074	1.47622	2.53383	0.0258918	1.58684	0.0999755	-3.88335
AcCoAS	0.393711	9.76857	3.56127	0.00379746	2.42051	0.0264307	-2.9454
CG31704	0.393602	4.77663	3.36885	0.00543487	2.26481	0.0339018	-3.25932
CG42326	0.392939	3.41329	5.38088	0.000153805	3.81303	0.00260505	0.567821
CG14022	0.392834	7.81765	7.67543	5.05798e-06	5.29602	0.000251464	3.90008
beg	0.392732	4.89365	7.79655	4.30397e-06	5.36613	0.000225181	4.12403
mRpL4	0.392692	5.25898	7.15858	1.02759e-05	4.98818	0.000410749	3.18161
CG31414	0.392527	5.68128	4.7508	0.00044571	3.35095	0.00554668	-0.800612
T3dh	0.390729	4.44664	6.59709	2.30627e-05	4.63709	0.000710167	2.41486
CG1809	0.390675	-0.541402	0.500918	0.625309	0.203905	0.776334	-5.75904
mRpL1	0.389745	5.58778	9.1574	7.8533e-07	6.10495	6.38033e-05	5.85998
CG13759	0.389338	1.27281	2.19996	0.0477067	1.32142	0.150682	-4.38278
CG1628	0.38929	5.11859	3.07191	0.00947739	2.02331	0.0498199	-3.88562
LpR1	0.38916	7.52535	4.4288	0.0007836	3.10591	0.00844716	-1.38696
CG8475	0.388696	9.39109	9.65763	4.40736e-07	6.35582	4.15498e-05	6.50226
mRpS22	0.388615	5.98315	5.44558	0.000138318	3.85912	0.00240803	0.395134
CG8257	0.388451	4.88705	5.76998	8.196e-05	4.0864	0.00168178	1.03826
CG9815	0.387415	0.679409	1.27846	0.22478	0.648243	0.420625	-5.68304
CG5116	0.386857	6.47245	6.71757	1.93225e-05	4.71394	0.000637258	2.45827
CG9338	0.386562	5.80752	6.41284	3.03432e-05	4.51794	0.00086142	1.99583
rost	0.386105	5.19849	5.21906	0.000201085	3.69662	0.003128	0.0282909
CG14763	0.385487	-0.00887448	1.12248	0.283178	0.54794	0.489077	-5.75355
CG32500	0.385117	6.0759	7.69868	4.90296e-06	5.30954	0.000244976	3.90719
RpL24-like	0.384945	7.74564	5.37725	0.000154728	3.81043	0.00261148	0.308802
CG34010	0.384751	0.443514	1.81082	0.0947494	1.02342	0.238137	-4.7315
CG6115	0.384518	8.91862	5.60856	0.000106143	3.97411	0.00197153	0.73
CG1657	0.384315	7.30218	7.03867	1.21705e-05	4.91469	0.000464197	2.9597
Cyp309a2	0.384271	4.44256	2.94016	0.012133	1.91603	0.0591913	-4.02471
Cyp304a1	0.382676	0.671367	0.785869	0.446881	0.349808	0.642634	-6.04865
CG32024	0.38239	-0.845312	0.17564	0.863447	0.0637643	0.929936	-5.42715
CG6259	0.381668	6.86926	8.19987	2.54536e-06	5.59425	0.000149622	4.60159
Cp18	0.381542	-0.235775	1.83657	0.0906507	1.04263	0.231563	-4.5076
CG31235	0.380848	1.28867	2.58262	0.0236531	1.62611	0.0938701	-3.68999
Txl	0.380773	5.85748	6.8702	1.54849e-05	4.81009	0.000540568	2.69905
Npl4	0.379664	12.0074	6.81631	1.67382e-05	4.77629	0.000573272	2.73543
Msh6	0.379149	2.79155	3.29392	0.00625211	2.20397	0.0372999	-2.93439
Map205	0.377292	7.69449	5.06211	0.000261693	3.58221	0.00377904	-0.246781
pgant6	0.375793	5.05912	3.32305	0.0059206	2.22763	0.03585	-3.38802
CG30373	0.375429	6.60883	5.68793	9.34296e-05	4.02952	0.00182173	0.806035
CG42524	0.375049	0.880014	2.27056	0.0419796	1.37696	0.139555	-4.21314
aay	0.374874	7.94325	4.50523	0.00068457	3.16458	0.00763998	-1.23468
Act87E	0.373817	8.94538	5.37862	0.000154379	3.81141	0.00261033	0.342782
CR43481	0.373726	-0.0944587	1.54717	0.14726	0.831916	0.319212	-4.92603
CG14079	0.373365	-0.922686	1.96656	0.0723084	1.14081	0.200493	-4.4122
CG3270	0.373347	5.04117	1.82586	0.0923352	1.03463	0.234011	-6.00186
CG1208	0.37313	5.89575	3.13375	0.00843974	2.07367	0.0460362	-3.81394
CG10396	0.372102	0.0940476	0.349014	0.733005	0.134893	0.847694	-5.95507
CG42796	0.371997	1.12626	2.38038	0.0343531	1.46403	0.121821	-4.01479
CG7275	0.371328	4.5477	7.01765	1.25393e-05	4.90173	0.00047443	3.04667
Lsp1alpha	0.370104	4.34867	2.03047	0.0646018	1.18976	0.185731	-5.48236
CG13397	0.370068	4.34852	3.12904	0.00851461	2.06984	0.0462426	-3.59762
CG12483	0.370064	1.61922	4.14084	0.00131186	2.88211	0.0123325	-1.68159
d	0.369577	2.00169	3.14101	0.00832574	2.07958	0.0455636	-2.98786
Fen1	0.369413	2.12614	4.70475	0.000482777	3.31625	0.00589059	-0.193537
CG34393	0.368953	3.00708	5.0225	0.000279833	3.5531	0.00396648	0.123556
Sry-alpha	0.368846	1.60743	2.58215	0.0236736	1.62574	0.0938772	-3.93166
Mst85C	0.368679	3.98369	5.73122	8.71809e-05	4.05958	0.00176	1.10766
Tpi	0.368623	8.71887	4.63343	0.000546648	3.26229	0.00643422	-0.984977
Acon	0.36814	12.4119	7.4969	6.43728e-06	5.1913	0.00029644	3.74517
Nmda1	0.368069	8.45418	8.92373	1.03721e-06	5.98413	7.62119e-05	5.58459
CG10623	0.36806	5.37195	3.93897	0.00189299	2.72285	0.0160993	-2.25591
CG7203	0.36784	3.19154	1.69933	0.11449	0.941233	0.270538	-5.76864
NetA	0.367395	4.30545	4.60865	0.000570843	3.24348	0.00666469	-0.860132
SpdS	0.366993	4.89676	3.58981	0.00360143	2.44352	0.025488	-2.8827
CG1136	0.365984	4.72409	4.94753	0.000317867	3.49775	0.00433349	-0.356482
snoRNA:Psi28S-2566	0.365871	0.313818	1.86568	0.0862089	1.06445	0.224233	-4.6662
CG2444	0.364303	2.03774	2.99701	0.0109065	1.96231	0.0549448	-3.28102
CG9766	0.362823	4.09082	6.27047	3.76267e-05	4.4245	0.000983293	1.99784
Ing3	0.36231	4.07004	4.20979	0.00115859	2.93607	0.0111755	-1.60485
CG13331	0.361636	-0.521794	1.72172	0.110255	0.957602	0.263899	-4.91554
Kua	0.361615	4.65695	4.30525	0.000976344	3.0104	0.00983257	-1.46574
vg	0.361283	5.55944	5.74221	8.56657e-05	4.06719	0.00173643	0.940411
CG5697	0.360855	1.31735	0.269642	0.791924	0.101316	0.884618	-6.08194
cp309	0.360666	9.13738	5.9807	5.88039e-05	4.23059	0.00133552	1.34782
CG32512	0.360094	4.98751	3.20943	0.00732376	2.13527	0.0416779	-3.64863
CG42235	0.359347	6.00186	1.15381	0.270594	0.567683	0.47506	-7.01468
CG9140	0.358668	11.2818	8.53578	1.6665e-06	5.77819	0.000108846	5.14585
CG42269	0.358223	1.76545	2.57804	0.0238547	1.62243	0.094408	-4.07399
CG5590	0.358013	6.70783	8.62979	1.48345e-06	5.82873	9.81726e-05	5.16694
rept	0.357842	4.43952	6.38717	3.15368e-05	4.50118	0.000871737	2.08706
CG7705	0.357171	5.19552	9.61533	4.62374e-07	6.33501	4.31823e-05	6.45363
RunxA	0.356948	0.74876	2.11984	0.0550976	1.25887	0.165691	-4.33253
CG43149	0.356573	2.23679	4.03135	0.00159973	2.79595	0.0142605	-1.61177
CG8067	0.356375	5.94527	5.32093	0.00016979	3.77009	0.00275826	0.183378
Pcmt	0.356094	6.78736	6.33665	3.4034e-05	4.46809	0.000914252	1.86745
Tsp42Eh	0.355661	5.22142	5.49805	0.000126965	3.89632	0.00225358	0.530753
CG32649	0.355624	6.58137	6.39623	3.11101e-05	4.5071	0.000868388	1.95838
CG9492	0.355229	4.45587	4.58856	0.00059129	3.2282	0.00684677	-1.06552
CG18586	0.354853	0.501707	1.9448	0.07512	1.12424	0.205833	-4.70474
CG10157	0.354755	4.8302	4.86968	0.000363138	3.43993	0.00478738	-0.499533
CG33057	0.35469	1.67319	2.91029	0.0128316	1.89172	0.0614111	-3.31652
mRpL42	0.354383	4.99932	5.43157	0.000141525	3.84917	0.00243839	0.447962
Sirt4	0.353916	5.91371	6.76469	1.80401e-05	4.74376	0.000609037	2.54036
CG18643	0.353835	2.82662	4.41551	0.000802278	3.09568	0.00860211	-0.959903
CG11035	0.353765	6.13389	7.61466	5.4883e-06	5.26056	0.000267319	3.78715
wun2	0.353703	2.07997	2.9696	0.0114817	1.94	0.0568282	-3.23984
Kif3C	0.353248	4.29927	2.35932	0.0357048	1.44727	0.124973	-5.04356
alpha-Est9	0.35313	7.71056	8.51131	1.71801e-06	5.76497	0.000111481	5.04283
Las	0.352622	7.65117	8.77605	1.2401e-06	5.90654	8.48789e-05	5.37838
CG6761	0.350796	0.804558	0.621105	0.545916	0.262874	0.722466	-6.26616
Hsc70-5	0.350778	9.41744	8.80534	1.19672e-06	5.92201	8.30097e-05	5.4558
CG5828	0.350035	3.9049	4.41007	0.000810067	3.09148	0.00866702	-1.15679
alpha-Est2	0.349788	5.3983	5.34722	0.000162575	3.78895	0.00268318	0.263209
salr	0.349483	4.8483	5.07873	0.000254452	3.59439	0.00369048	-0.10069
CG32191	0.349288	5.1244	3.61361	0.00344594	2.46269	0.024738	-2.85463
CG7718	0.349176	4.03685	8.23232	2.44201e-06	5.61225	0.000146126	4.86776
CG5493	0.348829	6.42209	5.54559	0.000117523	3.92988	0.00212184	0.563062
Tdc2	0.348653	2.33089	3.63553	0.00330875	2.48034	0.0241346	-2.14618
Aldh	0.348364	10.4356	7.47131	6.66574e-06	5.17615	0.000300049	3.66516
CG10151	0.348327	2.07176	3.3532	0.00559611	2.25211	0.0345624	-2.64636
stv	0.34817	8.23876	5.97577	5.92588e-05	4.22725	0.00133976	1.32237
Gs1	0.346688	8.41563	7.25982	8.92049e-06	5.04961	0.000369886	3.31827
CG3964	0.34602	1.47611	0.260285	0.798968	0.0974707	0.889349	-6.26323
CG13437	0.345941	-0.298436	1.9267	0.077535	1.1105	0.210488	-4.56758
CG6790	0.345839	-2.30801	0.12172	0.905095	0.0433057	0.951827	-5.28769
CG7456	0.345198	5.27799	9.05924	8.82094e-07	6.05449	6.94076e-05	5.75679
CG11425	0.345161	2.02967	1.32814	0.208349	0.681209	0.400978	-6.11497
CG12310	0.344784	2.92815	1.0884	0.297372	0.5267	0.504661	-6.77237
tomboy40	0.34473	-0.450198	0.261587	0.797987	0.0980044	0.88878	-5.73761
asrij	0.344577	5.68633	5.08569	0.00025148	3.5995	0.00365427	-0.216578
CG2658	0.343401	6.78417	9.44206	5.63668e-07	6.24898	4.89803e-05	6.18918
Ald	0.342321	12.9765	5.87474	6.94355e-05	4.15842	0.00148914	1.26202
CG6693	0.342319	4.3977	6.12252	4.71922e-05	4.32613	0.0011702	1.68972
CG15082	0.34182	0.113628	2.41889	0.0320082	1.49474	0.116101	-3.73972
CG3558	0.340409	6.85756	8.49825	1.74619e-06	5.75791	0.000112232	4.99763
CG31643	0.338891	4.67624	5.93167	6.34923e-05	4.19728	0.00141941	1.34539
CG5045	0.338498	6.378	7.25536	8.97602e-06	5.04692	0.000369947	3.26586
CG9213	0.337571	3.37033	8.49556	1.75205e-06	5.75645	0.000112232	5.29592
CG13575	0.337201	0.709716	1.77896	0.100054	0.999768	0.247056	-5.02098
CG17726	0.336677	5.48079	5.43684	0.00014031	3.85291	0.00242161	0.420299
CG30195	0.335238	0.498635	2.37311	0.034814	1.45825	0.122758	-3.92974
CG12118	0.334155	6.8982	6.73984	1.87047e-05	4.72805	0.000623055	2.50088
Adh	0.333218	3.33476	2.56445	0.0244639	1.61147	0.0963231	-4.57779
CG9804	0.333078	4.1221	4.01863	0.00163714	2.78591	0.0145052	-1.95647
Lmpt	0.333041	10.5647	5.88218	6.86264e-05	4.16351	0.00148874	1.22244
CG8038	0.332966	3.79385	6.02953	5.44973e-05	4.26363	0.00126063	1.63381
CG11899	0.332917	6.86833	3.92209	0.0019523	2.70945	0.0165473	-2.34563
mRpL45	0.332619	6.03205	10.9749	1.0708e-07	6.97029	1.69019e-05	7.94193
mRpS18B	0.332135	4.04976	4.55117	0.000631391	3.1997	0.00719934	-0.975366
CG33296	0.332042	3.5786	4.2914	0.00100082	2.99964	0.00996134	-1.26156
CR43461	0.331749	0.418267	2.4227	0.0317849	1.49778	0.115375	-3.91144
CG4409	0.330303	1.91217	2.0252	0.0652073	1.1857	0.186977	-4.93778
CG8292	0.329962	0.10358	0.521798	0.611117	0.213875	0.768458	-6.00114
CG2003	0.329776	5.55307	5.67987	9.46428e-05	4.02391	0.00182933	0.822622
CG14945	0.329622	5.54009	5.12238	0.000236417	3.62632	0.00352575	-0.123837
CG4408	0.329557	5.47293	3.76	0.00262891	2.58022	0.020524	-2.56649
CG8784	0.329161	1.52817	2.83517	0.0147697	1.83063	0.0674866	-3.58985
bigmax	0.328952	5.1952	9.53638	5.05871e-07	6.29596	4.55421e-05	6.35254
CG9507	0.328597	2.61206	3.5302	0.00402319	2.39543	0.0276125	-2.42126
Zasp66	0.32858	11.2796	7.47323	6.64836e-06	5.17729	0.000300049	3.69362
CG14109	0.328528	7.85403	4.38815	0.000842229	3.07457	0.00887805	-1.44889
CG4733	0.32777	7.01744	6.31885	3.49633e-05	4.45639	0.000931702	1.84252
CG12007	0.327547	5.12562	6.69779	1.98893e-05	4.70138	0.000645305	2.49375
CG2453	0.327448	5.81421	9.84292	3.57953e-07	6.44617	3.71839e-05	6.67299
CG11594	0.327274	7.35267	3.7545	0.0026557	2.57582	0.0206956	-2.65126
Tsp5D	0.327044	4.90899	7.04844	1.20029e-05	4.92071	0.000459559	3.08651
ZnT35C	0.326708	2.53971	0.998226	0.337482	0.471749	0.544412	-6.52285
CG12836	0.326	-0.96457	1.89781	0.0815376	1.08864	0.216531	-4.50467
Aats-pro	0.325579	3.60594	4.7936	0.000413928	3.38308	0.00528273	-0.440718
CG15506	0.324816	1.45497	2.16233	0.0510529	1.29198	0.157169	-4.52402
CG7409	0.324667	9.15389	6.05747	5.21846e-05	4.28246	0.00122413	1.47807
CG11345	0.324574	-2.00682	1.46362	0.168483	0.773445	0.349304	-5.22174
CG32444	0.324254	8.5633	2.73433	0.0178331	1.74877	0.0764179	-4.52915
CG7382	0.323937	5.77376	7.43152	7.03844e-06	5.15252	0.0003126	3.53574
Obp99c	0.323515	9.65889	4.10839	0.00139113	2.85663	0.0128007	-1.9237
Hdc	0.323169	3.88633	3.28492	0.00635832	2.19666	0.0376414	-3.49005
CG5910	0.322299	5.48866	3.43753	0.00478097	2.32048	0.0309231	-3.2395
CG1970	0.322182	10.2218	7.91728	3.67056e-06	5.43527	0.00019827	4.29394
mRpS30	0.321922	7.44098	5.92159	6.45036e-05	4.19042	0.00143241	1.21714
CG42240	0.321576	8.19847	6.90396	1.47509e-05	4.83118	0.000525549	2.78187
CG5543	0.32157	3.54812	5.67002	9.61499e-05	4.01705	0.00185488	1.09656
CG14086	0.321348	-0.335473	1.43199	0.177168	0.751614	0.361018	-5.08387
CG3835	0.321053	8.47858	6.90267	1.47783e-05	4.83038	0.000525549	2.78241
Men	0.320781	9.67632	2.70186	0.0189468	1.72246	0.079821	-4.55326
CG3523	0.3203	11.5467	2.7608	0.016973	1.77024	0.0739093	-4.39505
tst	0.319793	4.77447	8.28	2.29817e-06	5.63862	0.000139993	4.82297
CG5676	0.319572	7.56269	5.34904	0.000162088	3.79025	0.00268318	0.253702
CG42488	0.319457	0.320241	1.21174	0.248469	0.604729	0.448185	-5.48637
mir-4954	0.31921	0.650071	1.54114	0.148713	0.827652	0.320835	-5.19208
Vps28	0.318813	6.30179	6.04522	5.31857e-05	4.27421	0.00123889	1.39396
Dgp-1	0.318474	5.94481	8.90719	1.05805e-06	5.97549	7.66166e-05	5.53038
CG10918	0.318464	-0.232877	1.03803	0.319313	0.495783	0.527604	-5.65972
cdc23	0.318318	3.17169	4.6086	0.000570897	3.24344	0.00666469	-0.657816
CG13082	0.318293	3.76303	2.63729	0.0213681	1.67023	0.0875129	-4.40969
mRpS2	0.318247	5.0501	5.5061	0.00012531	3.90201	0.00223213	0.568472
CG31886	0.318084	4.70412	4.50216	0.000688279	3.16224	0.00765922	-1.1392
Ucp4A	0.317918	7.11271	6.36658	3.25301e-05	4.48771	0.000889518	1.91882
NTPase	0.317525	8.02699	7.86303	3.94192e-06	5.40429	0.00021065	4.16591
repo	0.317273	5.18792	4.68203	0.000502229	3.2991	0.00606132	-0.899149
CG9961	0.317068	1.6075	1.20331	0.251598	0.599292	0.451927	-6.03475
CG43253	0.316971	-0.196908	1.67766	0.118726	0.925454	0.277272	-4.80119
Ork1	0.316953	5.82652	2.81602	0.0153083	1.81507	0.068877	-4.4184
CG14795	0.316439	0.124362	1.3131	0.213218	0.671177	0.406852	-5.2878
Fer2LCH	0.316124	9.75429	5.61425	0.000105173	3.9781	0.00196447	0.758557
CG10082	0.316046	7.80237	8.67343	1.4059e-06	5.85205	9.3661e-05	5.25276
CG8219	0.315547	-0.0434899	0.484001	0.636923	0.195913	0.784709	-5.93507
CG11679	0.315538	3.83435	4.72768	0.000463937	3.33354	0.00568849	-0.583655
Drip	0.315449	6.84055	4.82239	0.000393889	3.40463	0.00510523	-0.686071
CG18628	0.315222	-0.54845	0.111488	0.913036	0.0395122	0.954674	-5.64713
CG11353	0.315152	-0.16982	0.914917	0.377895	0.422629	0.580523	-5.529
CG8908	0.314795	2.60385	3.85942	0.00218972	2.65961	0.0179802	-1.77706
Tsp42Ei	0.314592	6.9697	6.91928	1.44302e-05	4.84073	0.000521193	2.78135
Gbs-76A	0.314435	10.0967	3.87553	0.00212599	2.67244	0.0176895	-2.35066
CG9485	0.313924	8.44477	5.59185	0.000109046	3.96239	0.0020068	0.683655
CG11779	0.313883	6.56085	7.93178	3.60146e-06	5.44352	0.000197127	4.22905
CG8837	0.313513	3.47663	1.54739	0.147207	0.832071	0.319167	-6.09049
CG7766	0.313508	9.56433	7.11	1.10025e-05	4.95851	0.000432868	3.12019
l(1)G0004	0.313263	3.92247	4.39708	0.000828961	3.08147	0.00879385	-1.23109
CG13056	0.312428	3.35085	2.98652	0.0111232	1.95377	0.0558003	-3.61383
CG32195	0.312308	4.56531	2.1371	0.0534196	1.2723	0.162386	-5.42288
CG10732	0.312079	8.15949	5.60899	0.00010607	3.97441	0.00197153	0.712512
Strn-Mlck	0.311791	11.0161	5.24505	0.000192564	3.71543	0.00303516	0.153737
b6	0.311355	0.895365	2.72261	0.0182275	1.73927	0.0774765	-3.38391
CG12164	0.311144	-0.897988	1.71366	0.111763	0.951703	0.265979	-5.1495
CG7378	0.310947	8.99509	7.40657	7.28333e-06	5.13767	0.000320573	3.54312
CG6356	0.310899	5.65705	6.42462	2.98115e-05	4.52562	0.000854736	2.03951
CG13822	0.310867	1.90044	2.12841	0.054258	1.26554	0.164055	-4.67336
ru	0.310586	2.00063	2.82941	0.0149296	1.82595	0.0678761	-3.67619
cactin	0.310414	4.50894	6.26211	3.81082e-05	4.41898	0.000991705	1.89227
CG6597	0.309072	6.69222	7.01265	1.26287e-05	4.89864	0.00047443	2.9097
CG2950	0.308693	8.31209	7.97352	3.41017e-06	5.46722	0.000189096	4.32886
vri	0.308353	8.10858	5.86417	7.06013e-05	4.15119	0.0015011	1.136
Aplip1	0.308308	5.33587	6.64479	2.14973e-05	4.66762	0.000681977	2.40038
CG8830	0.308169	6.88351	9.27387	6.85035e-07	6.16429	5.75256e-05	5.98575
CG3011	0.308082	7.98721	3.86889	0.00215201	2.66716	0.017833	-2.4108
l(3)76BDr	0.307754	7.26281	6.9902	1.30388e-05	4.88476	0.000481133	2.88821
CG6415	0.307637	5.99513	4.67168	0.000511363	3.29127	0.00611982	-0.963514
CG13795	0.307585	6.05352	6.70076	1.98031e-05	4.70327	0.000645305	2.43734
Sgs1	0.307296	-0.554386	1.32083	0.210704	0.676327	0.40352	-5.04663
Sobp	0.30721	5.006	3.58738	0.00361775	2.44156	0.0255492	-2.88528
CG11034	0.307178	3.89729	0.811525	0.432552	0.363962	0.630468	-6.98901
Corp	0.307135	2.35161	2.57308	0.0240754	1.61843	0.0950929	-4.06382
CG16753	0.306984	2.95615	3.56299	0.00378529	2.4219	0.0264307	-2.54068
Ide	0.306896	7.26984	8.43538	1.88895e-06	5.72378	0.000120231	4.92414
CG9394	0.306793	5.79554	2.32926	0.0377222	1.4234	0.129405	-5.2433
CG10219	0.306653	8.76755	6.69935	1.98442e-05	4.70237	0.000645305	2.48301
Ca-beta	0.30601	7.4201	3.47368	0.00446946	2.34975	0.0295783	-3.17179
CG9410	0.305971	5.07128	4.50454	0.000685399	3.16406	0.00763998	-1.19702
CG16857	0.305805	6.12541	5.06597	0.000259991	3.58504	0.0037599	-0.262081
mRpS7	0.305684	7.60432	6.91846	1.44472e-05	4.84022	0.000521193	2.79564
CG10962	0.305484	2.72219	2.71619	0.0184471	1.73407	0.0782438	-3.98934
l(1)G0136	0.305292	7.20814	6.49529	2.68221e-05	4.57151	0.000792997	2.12808
CR43875	0.305139	1.35242	2.33045	0.03764	1.42435	0.129168	-4.24968
Adgf-C	0.305069	1.69273	2.36717	0.035195	1.45352	0.123622	-4.34886
sug	0.305029	5.45282	1.77111	0.101401	0.993957	0.249459	-6.19299
CG14196	0.304989	6.05171	5.36451	0.000158008	3.80132	0.00263533	0.262718
CG3476	0.303674	4.47888	6.40559	3.06753e-05	4.51321	0.000863487	2.12267
CG11069	0.303146	2.87185	3.29108	0.00628552	2.20166	0.0374099	-3.08268
CG10257	0.303059	2.94162	3.5791	0.00367376	2.43489	0.0258534	-2.52559
Cyp6g2	0.303043	4.22027	1.31227	0.213488	0.670626	0.407135	-6.4214
CG8206	0.30302	7.68091	6.15447	4.49284e-05	4.34748	0.00112637	1.59811
CR32194	0.302929	1.33087	2.19517	0.0481205	1.31767	0.151121	-4.45208
CG12256	0.302372	3.3473	3.17324	0.0078376	2.10582	0.0437304	-3.29857
CG13315	0.302053	9.4586	3.17761	0.00777367	2.10937	0.0435439	-3.6732
mtRNApol	0.302037	6.8115	6.41561	3.02172e-05	4.51975	0.000860287	1.99392
CG14141	0.301791	3.64695	4.15616	0.00127609	2.89412	0.0120643	-1.59089
jet	0.301561	4.26185	5.36361	0.000158243	3.80068	0.00263533	0.452271
Ripalpha	0.301503	4.60297	5.28001	0.000181697	3.74065	0.00290048	0.254191
Pi3K59F	0.301378	5.62436	5.6912	9.29407e-05	4.03179	0.00182173	0.835631
CG2898	0.301364	1.35067	1.19035	0.25647	0.590964	0.457816	-5.85633
Cyp6w1	0.301026	7.38106	2.73495	0.0178125	1.74928	0.0763621	-4.55456
Gpo-1	0.300619	9.35473	5.16382	0.000220537	3.65652	0.00336976	-0.0296796
CG5532	0.300602	5.37989	3.52524	0.00406047	2.39142	0.0277597	-3.05701
dysb	0.300184	3.45875	4.26204	0.00105485	2.97681	0.0104161	-1.35537
CG15522	0.300174	1.12714	2.12552	0.05454	1.26328	0.164629	-4.48038
MED4	0.300139	3.38101	4.67473	0.000508657	3.29357	0.00610205	-0.599754
Cpr100A	0.299244	2.04714	2.64105	0.0212191	1.67327	0.0871528	-3.91228
CG10802	0.299111	5.87057	4.78039	0.000423479	3.37317	0.00534321	-0.755892
CG3009	0.298882	5.5884	5.32526	0.000168578	3.7732	0.00274365	0.225676
Prm	0.298587	10.6142	7.54268	6.04904e-06	5.21831	0.000289225	3.77576
PSR	0.298179	5.27553	3.36117	0.0055134	2.25858	0.0342332	-3.33929
CR43611	0.297963	2.62301	2.20787	0.0470301	1.32762	0.14956	-4.90254
TfIIFbeta	0.297937	4.16387	6.6063	2.27512e-05	4.64299	0.00070388	2.49373
Cyp6t1	0.297916	4.92836	3.60176	0.00352249	2.45315	0.0250714	-2.82459
GNBP3	0.297764	6.66018	3.9796	0.00175773	2.75505	0.015221	-2.24257
Cad74A	0.297461	0.699192	1.66824	0.12061	0.918616	0.280554	-4.99248
CG42554	0.296986	4.14912	5.12774	0.000234296	3.63024	0.00351549	0.0458847
CG11221	0.296652	2.98819	4.32432	0.00094365	3.02519	0.00966177	-1.13126
metro	0.296101	6.4102	6.22527	4.03102e-05	4.39459	0.00103553	1.6851
CG9914	0.295943	8.07498	2.83958	0.0146481	1.83422	0.0670847	-4.34759
CG31849	0.295865	3.4168	3.57386	0.00370967	2.43066	0.0260511	-2.63486
Trap1	0.295474	7.16638	7.49998	6.41031e-06	5.19312	0.00029644	3.63543
Ilk	0.295057	7.3318	7.28621	8.59943e-06	5.06553	0.000361068	3.33226
CG3626	0.293804	7.3524	7.53371	6.12314e-06	5.21303	0.000289993	3.68638
CG14786	0.293741	5.97009	3.18725	0.00763449	2.11722	0.0430053	-3.72031
Lrt	0.293261	5.14042	2.96576	0.0115645	1.93687	0.0570971	-4.09846
CG8818	0.293186	7.77137	5.87847	6.90283e-05	4.16097	0.00148914	1.15172
CR31781	0.293095	10.2485	5.74729	8.49746e-05	4.07071	0.00173274	0.99279
LSm1	0.293035	3.5251	4.179	0.00122461	2.912	0.011707	-1.51987
CG14962	0.292453	3.03163	4.29389	0.000996377	3.00158	0.00994704	-1.18846
CG12079	0.292189	8.73233	5.56981	0.000113001	3.94692	0.00206439	0.65891
CG10561	0.291967	7.07455	5.22608	0.000198745	3.7017	0.00311784	0.0277893
CG34141	0.291941	3.17801	4.60755	0.000571945	3.24265	0.00666763	-0.698812
CG8005	0.291896	2.53814	2.69136	0.0193213	1.71396	0.081125	-3.9953
CG13285	0.291249	4.07478	4.30081	0.000984117	3.00695	0.00986351	-1.37663
tld	0.290946	3.38607	2.4646	0.0294247	1.53129	0.109512	-4.65428
Nc73EF	0.29087	12.4043	4.21124	0.00115557	2.9372	0.0111571	-1.67042
fh	0.2903	4.50946	4.34339	0.000912079	3.03997	0.0093904	-1.40077
mRpS5	0.290216	9.49845	3.30137	0.00616564	2.21002	0.0369384	-3.44237
ver	0.2895	2.96631	3.43297	0.00482178	2.31679	0.0310986	-2.79806
CG13390	0.28883	4.54752	4.77886	0.000424598	3.37202	0.00534577	-0.62189
CR43411	0.288223	2.34089	2.73169	0.0179214	1.74663	0.0765991	-3.88822
CG6425	0.288158	-0.361058	0.63595	0.536511	0.270421	0.714181	-5.85197
trbd	0.287582	8.73399	4.3327	0.000929632	3.03169	0.0095378	-1.53444
CG1882	0.287563	7.30664	7.00004	1.28573e-05	4.89085	0.000478449	2.90266
CG12155	0.287544	4.88915	5.38183	0.000153565	3.81371	0.00260505	0.367722
CG42868	0.287336	2.04204	1.84494	0.0893516	1.0489	0.229472	-5.22095
CG14407	0.286943	7.21926	5.28261	0.000180914	3.74253	0.00289723	0.130714
CG4030	0.286655	5.82825	7.09436	1.1248e-05	4.94893	0.000437358	3.03882
cln3	0.286586	5.93496	5.87331	6.95918e-05	4.15744	0.00148914	1.13244
CG42358	0.286581	3.07773	3.32558	0.00589269	2.22969	0.0357968	-3.0188
Pol32	0.2855	3.27285	3.33093	0.00583403	2.23403	0.0355701	-3.06656
CG15343	0.285208	3.51605	4.3212	0.000948907	3.02278	0.00969573	-1.26226
CG5888	0.285176	4.45553	4.47392	0.000723461	3.14058	0.00797803	-1.1714
UbcD6	0.284692	8.06189	5.71562	8.93802e-05	4.04876	0.00179714	0.887338
Mcm7	0.284384	0.941413	2.45986	0.029683	1.52749	0.110146	-3.88574
CG14778	0.284277	4.351	4.02502	0.00161824	2.79096	0.0143743	-1.98334
CG8654	0.284242	5.84721	2.72587	0.018117	1.74191	0.0772416	-4.55561
CG15412	0.284173	7.15291	6.15381	4.49736e-05	4.34704	0.00112637	1.58396
CG18336	0.284115	0.692471	0.759348	0.462009	0.33535	0.655896	-6.07603
CG17272	0.284107	4.57711	2.61022	0.0224712	1.64837	0.0906898	-4.63419
CG43322	0.284061	4.59562	2.61174	0.0224079	1.6496	0.0905466	-4.61021
CG31793	0.283983	5.88205	5.77304	8.15627e-05	4.08851	0.00167707	0.960416
CG12162	0.28397	7.21381	5.22091	0.000200465	3.69796	0.003128	0.019819
mRpL2	0.283924	5.52686	4.23219	0.00111288	2.95355	0.0108252	-1.74263
bwa	0.283913	5.32613	6.21453	4.09767e-05	4.38746	0.00104193	1.72084
CG2211	0.282299	3.01629	3.75254	0.00266532	2.57425	0.0207273	-2.21999
Nup58	0.281864	4.31183	3.98495	0.00174068	2.75928	0.0151539	-2.07428
Ptx1	0.281217	2.36633	0.771172	0.455225	0.341774	0.649674	-6.55045
Fbw5	0.280903	4.30228	5.3261	0.000168345	3.7738	0.00274365	0.385753
Obp83cd	0.280663	-0.126061	1.34316	0.203578	0.691269	0.394791	-5.31529
NPFR1	0.280012	1.59447	1.85772	0.0874035	1.05847	0.226334	-5.00193
CG5376	0.279882	3.72034	3.94888	0.00185903	2.73071	0.0158916	-2.00809
CG30001	0.279157	-0.279543	1.523	0.153151	0.814879	0.328069	-5.0272
iav	0.279128	1.31818	2.69458	0.0192058	1.71657	0.0807082	-3.78597
CG12935	0.278713	3.05509	3.45392	0.0046371	2.33375	0.0302866	-2.74064
CG5538	0.2782	0.855029	0.183034	0.857766	0.066631	0.926365	-6.20743
Kebab	0.278181	0.14448	1.09195	0.295867	0.528903	0.502805	-5.54934
Tsp42Ep	0.277834	0.122474	1.54693	0.147317	0.831747	0.319267	-4.99504
CG5022	0.277791	2.59515	4.10338	0.00140381	2.85269	0.0128818	-1.37967
Gr64a	0.277674	1.3412	2.91979	0.0126052	1.89945	0.0607289	-3.21992
CG7530	0.277552	7.58141	6.65432	2.11984e-05	4.6737	0.000678959	2.38414
Ski6	0.277192	2.14795	3.55629	0.00383272	2.41649	0.026616	-2.28892
CG32170	0.276803	6.11988	3.1709	0.00787197	2.10392	0.0438558	-3.7644
CG30493	0.276653	6.92367	4.86231	0.000367763	3.43443	0.00482925	-0.621917
CG9864	0.276367	3.15931	1.18124	0.259936	0.585134	0.462278	-6.57581
Egm	0.276202	6.04324	5.2185	0.000201271	3.69622	0.003128	0.00633488
CG31380	0.275815	2.08038	0.884357	0.393532	0.40502	0.595484	-6.31307
CG31961	0.275758	4.28263	4.81927	0.000396006	3.4023	0.00511939	-0.521847
Dh44	0.275435	2.91498	2.96997	0.0114736	1.9403	0.0568282	-3.57988
Npc2g	0.275186	7.87497	3.13224	0.00846367	2.07244	0.0461164	-3.80259
CG5577	0.275087	5.7156	3.6725	0.00308986	2.51006	0.0230165	-2.79258
LysP	0.274942	8.53231	3.11396	0.00875882	2.05755	0.0471548	-3.82797
CG2017	0.274753	7.31499	6.41064	3.04435e-05	4.51651	0.000861819	1.9944
Ir68a	0.274742	0.164844	1.70751	0.112927	0.947201	0.26784	-4.86722
Nup98-96	0.274499	6.65743	8.42644	1.91025e-06	5.71891	0.000120818	4.8989
CG3191	0.274496	3.73222	4.76639	0.000433855	3.36266	0.00542617	-0.539821
CG4042	0.273746	4.38608	4.23003	0.00111719	2.95187	0.0108284	-1.59991
Nmd3	0.273406	5.60587	4.84622	0.000378066	3.42243	0.00493214	-0.628617
geminin	0.273278	4.38765	4.02836	0.00160842	2.7936	0.0143051	-1.9796
CG8001	0.2732	5.34293	5.29053	0.000178553	3.74823	0.00286862	0.176757
Srp68	0.272718	5.75166	6.45106	2.86538e-05	4.54282	0.000832377	2.05782
CG34375	0.272661	0.303991	1.33716	0.205472	0.687247	0.397384	-5.43107
mRpL10	0.272576	5.15362	6.79303	1.73124e-05	4.76164	0.000586451	2.63302
CG14669	0.272574	4.89155	3.17701	0.00778235	2.10889	0.0435588	-3.62849
CG11279	0.272511	3.7633	3.62261	0.00338887	2.46995	0.0245576	-2.61127
stet	0.272483	0.740557	1.35014	0.201392	0.695957	0.392036	-5.53219
CG6674	0.272355	3.45171	3.13828	0.00836847	2.07735	0.0457473	-3.44446
SdhB	0.2721	10.4601	5.04812	0.000267954	3.57194	0.00384867	-0.199069
CG12084	0.272038	6.94684	8.21601	2.49339e-06	5.60321	0.000148312	4.62501
seq	0.271939	3.96961	2.41713	0.0321123	1.49333	0.116334	-4.83955
CG11368	0.271158	3.83129	2.02205	0.0655718	1.18328	0.187807	-5.8081
CG17002	0.271114	3.61393	3.16674	0.00793366	2.10053	0.0441677	-3.46563
fusl	0.270781	6.4528	4.02177	0.00162783	2.78839	0.0144466	-2.16414
CG4465	0.270428	-0.18056	1.00844	0.332751	0.477881	0.539917	-5.53712
CG5048	0.269954	0.197175	0.306539	0.764343	0.116712	0.867668	-6.20237
eIF2B-epsilon	0.269887	5.13874	6.27947	3.71154e-05	4.43045	0.000976037	1.83494
CG13890	0.269845	4.15299	5.01237	0.000284681	3.54564	0.00401244	-0.163513
Gnf1	0.269661	5.74546	6.32673	3.45487e-05	4.46157	0.000925589	1.86739
CG18731	0.269539	4.54079	6.01128	5.60668e-05	4.25129	0.00129394	1.47871
CG15771	0.269373	7.17383	4.35816	0.000888384	3.0514	0.00921872	-1.52397
Spt3	0.268723	2.99131	3.37358	0.00538706	2.26865	0.0336877	-2.88169
Rpn1	0.268677	6.96722	6.09281	4.94071e-05	4.30621	0.0011903	1.47906
CG11454	0.268472	4.26423	4.34757	0.000905309	3.0432	0.00935548	-1.36751
Hsc70-1	0.268395	9.02109	7.38669	7.48498e-06	5.12581	0.000325206	3.51624
CG43658	0.268353	7.09854	5.69077	9.30051e-05	4.03149	0.00182173	0.817007
CG7997	0.26835	7.38349	3.20415	0.00739648	2.13098	0.0419836	-3.68466
CG16718	0.268266	7.32644	6.17835	4.33107e-05	4.3634	0.00109571	1.62651
l(3)03670	0.268251	7.87632	5.65026	9.92509e-05	4.00327	0.00189639	0.773159
mRpL46	0.268125	4.8111	4.41118	0.000808469	3.09234	0.0086592	-1.34335
r	0.267952	5.35657	5.55144	0.000116415	3.93399	0.00211131	0.636975
Droj2	0.267662	9.28971	5.77859	8.08455e-05	4.09234	0.00166575	1.02112
Ubi-p63E	0.267532	9.98328	6.17367	4.36231e-05	4.36028	0.00110082	1.68587
CG31627	0.267235	1.19877	1.37295	0.19438	0.711348	0.382521	-5.67876
Kr	0.267178	1.05214	1.10853	0.288925	0.539214	0.496258	-5.79735
pnt	0.267163	4.64911	3.63501	0.00331192	2.47992	0.024139	-2.75137
CG1662	0.267095	5.91683	5.11646	0.000238781	3.622	0.00353503	-0.170162
CG8520	0.266848	7.93041	5.52209	0.000122094	3.91331	0.00219045	0.556982
mRpS9	0.266665	6.40557	5.47266	0.000132331	3.87834	0.00232813	0.439008
CG9791	0.266653	4.79209	4.53839	0.000645738	3.18994	0.00730788	-1.08957
Lsm10	0.265538	2.10092	3.26214	0.00663534	2.17814	0.0387987	-2.88501
CG15738	0.26546	4.25429	4.16912	0.0012466	2.90427	0.0118981	-1.68666
Cyp6a9	0.26425	6.69205	5.39952	0.000149166	3.82633	0.00254806	0.316928
RhoGAP68F	0.264193	6.65121	6.45509	2.84813e-05	4.54544	0.000832377	2.05152
wkd	0.264134	7.17771	6.74218	1.86409e-05	4.72953	0.000623005	2.51167
CG12128	0.264032	4.14709	6.07629	5.06852e-05	4.29512	0.00120882	1.64075
TpnC41C	0.263633	8.21438	6.36377	3.26682e-05	4.48587	0.000889518	1.94962
CG9674	0.263454	9.99684	6.8684	1.55252e-05	4.80896	0.000540568	2.77116
CG5844	0.263388	5.97851	5.69211	9.28057e-05	4.03243	0.00182173	0.813634
CG1885	0.263335	4.3029	4.74297	0.0004518	3.34505	0.00560154	-0.662178
CG9065	0.263269	7.86135	3.48038	0.00441406	2.35516	0.0293282	-3.14569
CG9890	0.263115	4.14885	4.5269	0.00065892	3.18117	0.00744021	-1.02997
CG12014	0.263054	1.69836	2.07869	0.0592992	1.22695	0.174216	-4.75835
Cpr50Ca	0.26267	-2.01882	0.611452	0.55208	0.257998	0.727066	-5.20892
ALiX	0.26262	7.13362	5.04705	0.00026844	3.57115	0.00384867	-0.285585
CG5984	0.262391	2.64922	2.5168	0.0267207	1.57315	0.102307	-4.40568
Cyp9h1	0.262201	5.37141	2.32372	0.0381057	1.41901	0.130185	-5.23415
CG12042	0.262096	4.68369	5.62853	0.000102781	3.98809	0.00193567	0.834397
Eno	0.261785	11.0224	5.29366	0.00017763	3.75048	0.00285839	0.240483
CG5191	0.26157	5.7645	2.54824	0.0252097	1.59843	0.0982144	-4.90957
CG15666	0.261433	1.38917	2.32376	0.0381027	1.41904	0.130185	-4.54401
TFAM	0.26102	6.41526	5.10215	0.000244603	3.61154	0.00359879	-0.202395
CG5630	0.260859	7.28257	1.87257	0.0851867	1.06963	0.222846	-6.03185
CG7966	0.260635	6.73267	5.88269	6.85711e-05	4.16386	0.00148874	1.1297
mRpL48	0.260584	3.89978	2.64676	0.020995	1.67788	0.0864455	-4.49184
frtz	0.260165	4.85744	4.20675	0.00116493	2.9337	0.0112258	-1.72998
CG15554	0.259775	0.831268	1.40499	0.184875	0.733122	0.37038	-5.50576
CG6951	0.259492	1.68243	1.80062	0.0964206	1.01583	0.241124	-5.15678
CG17572	0.259356	1.70121	2.95156	0.0118767	1.92531	0.0583211	-3.34967
CG6337	0.258816	-0.0828497	1.17039	0.264111	0.578213	0.466796	-5.72886
CG3394	0.258704	4.5675	1.80587	0.0955573	1.01974	0.239565	-6.00599
Ppt2	0.258656	6.24325	8.38625	2.0092e-06	5.69698	0.00012583	4.84624
CG10657	0.258386	2.1479	2.29971	0.0398113	1.39999	0.134267	-4.56746
Rcd5	0.257899	5.64502	4.26642	0.0010466	2.98022	0.0103449	-1.69168
desat1	0.257776	11.741	3.06908	0.00952785	2.021	0.0500062	-3.8188
Cdc6	0.257209	-0.0789257	1.68874	0.116543	0.933513	0.273776	-4.81729
Hr38	0.257083	4.47528	2.13542	0.0535808	1.27099	0.162696	-5.44142
CG32068	0.256918	7.01974	4.55078	0.000631824	3.1994	0.00719934	-1.18053
CG33158	0.256862	4.52355	3.57625	0.00369326	2.43259	0.0259724	-2.84644
CG5705	0.25672	4.04868	4.43205	0.000779092	3.10841	0.00840959	-1.16357
CG8010	0.256629	4.73108	4.10711	0.00139435	2.85563	0.0128185	-1.90066
Es2	0.256583	3.50569	5.71088	9.00603e-05	4.04547	0.00180344	1.17155
Pcaf	0.256407	5.7906	5.89501	6.72539e-05	4.17228	0.00147155	1.17082
CG32271	0.256315	2.45812	2.40227	0.0330007	1.48148	0.118753	-5.00003
CG6084	0.256241	8.56329	3.29695	0.00621685	2.20643	0.0371649	-3.47888
Cyp4g15	0.256129	5.99783	4.23494	0.00110739	2.9557	0.0107962	-1.75711
l(1)G0045	0.256034	1.93722	2.38249	0.0342209	1.46571	0.121697	-4.37982
SelR	0.255702	7.37127	7.72297	4.74645e-06	5.32363	0.00024285	3.95724
CG11409	0.25555	1.51343	2.31364	0.0388128	1.41103	0.131834	-4.23888
CG11267	0.255541	5.66111	5.89316	6.74502e-05	4.17102	0.00147168	1.1684
CG12170	0.255463	5.47363	3.45296	0.00464538	2.33298	0.0303011	-3.19819
ade2	0.255442	7.24806	1.38631	0.190369	0.720404	0.3769	-6.74779
mTerf3	0.255218	4.51196	6.25874	3.83045e-05	4.41675	0.000994226	1.87993
CCKLR-17D3	0.254846	1.09405	1.39431	0.188	0.725843	0.374098	-5.57307
Xrp1	0.25479	9.96432	6.51843	2.59141e-05	4.58646	0.000777578	2.23128
mib2	0.254474	6.62701	7.49353	6.46693e-06	5.1893	0.00029644	3.61272
Fit2	0.254127	4.52579	3.68734	0.00300624	2.52198	0.0226215	-2.63588
l(2)37Bb	0.254049	5.69564	4.69945	0.000487244	3.31225	0.00593061	-0.902361
CG11426	0.253851	4.42292	2.3533	0.0361005	1.44249	0.125972	-5.07982
CG8216	0.253735	3.64899	2.06655	0.0605938	1.21757	0.176977	-5.41133
Tpc2	0.253626	0.317445	0.431442	0.673643	0.17157	0.811344	-6.11401
CG3630	0.253548	8.35427	5.62435	0.000103475	3.98517	0.00194014	0.740463
Trxr-1	0.253164	8.24784	4.40652	0.000815181	3.08875	0.00869697	-1.41138
Ranbp11	0.252656	5.5223	5.13606	0.000231045	3.6363	0.00348827	-0.102697
Actn	0.252258	9.1438	4.96588	0.000308085	3.51133	0.00424488	-0.376822
CG5611	0.252033	4.38312	4.65227	0.000528956	3.27658	0.00627775	-0.820261
CG13607	0.251936	7.45979	2.03939	0.063588	1.19662	0.183508	-5.76275
mTTF	0.251896	4.99215	5.23846	0.000194688	3.71066	0.00306364	0.121521
CG30273	0.251823	3.59786	3.13084	0.00848596	2.0713	0.0462126	-3.50425
CG18549	0.251761	5.62002	4.72844	0.000463322	3.33412	0.00568849	-0.850154
Atg2	0.251676	7.13536	6.80751	1.69529e-05	4.77075	0.000578194	2.60502
CG16721	0.25158	7.11504	5.55175	0.000116355	3.93421	0.00211131	0.585606
Karybeta3	0.251496	8.92006	7.23924	9.17978e-06	5.03717	0.000375957	3.29706
Dpit47	0.251237	4.74474	4.15282	0.00128381	2.8915	0.0121029	-1.80968
fsd	0.250953	3.19884	3.57094	0.00372981	2.42831	0.0261332	-2.57424
glec	0.250699	5.91642	4.99675	0.000292327	3.53413	0.00410284	-0.382453
CG15547	0.250681	4.2826	3.81123	0.00239235	2.62117	0.0192471	-2.37164
140up	0.250605	4.64374	6.37162	3.22839e-05	4.49101	0.0008863	2.04349
Sodh-1	0.250568	7.72773	1.83863	0.0903293	1.04417	0.231096	-6.08692
RagC	0.25051	6.27539	6.73473	1.88445e-05	4.72482	0.000625624	2.48519
CG4552	0.250247	6.64736	5.49397	0.000127811	3.89343	0.00226056	0.478784
CG8569	0.250147	4.47875	4.88915	0.00035122	3.45442	0.00466101	-0.417486
CG9572	0.250072	8.06432	2.59278	0.023211	1.63431	0.0928372	-4.78842
Proc-R	0.249941	6.1648	4.84728	0.000377377	3.42322	0.00492958	-0.650798
CG6455	0.249923	8.7615	5.68852	9.33406e-05	4.02993	0.00182173	0.85926
Cyp309a1	0.249584	6.16683	1.44857	0.172569	0.763036	0.355125	-6.65868
Nplp1	0.249564	7.9735	4.77186	0.000429771	3.36676	0.0053896	-0.756234
l(2)37Cb	0.249533	3.8901	4.15025	0.00128976	2.88949	0.0121476	-1.65677
Hex-C	0.249516	6.72211	3.07135	0.00948739	2.02285	0.04982	-3.94897
CG4610	0.249438	5.8282	5.95532	6.11831e-05	4.21337	0.00137703	1.25843
CG2100	0.249431	4.9878	4.67672	0.000506891	3.29509	0.00608818	-0.881146
Coq2	0.249371	4.42571	6.36465	3.26251e-05	4.48645	0.000889518	2.05237
Vps33B	0.249154	4.61855	4.80092	0.000408733	3.38856	0.00523649	-0.602495
CG2608	0.249117	5.11459	4.15665	0.00127497	2.8945	0.0120643	-1.83286
TwdlT	0.249091	1.94478	2.19079	0.0485029	1.31423	0.151676	-4.72406
CG32354	0.248821	3.83729	3.41036	0.00502956	2.29847	0.0321643	-3.02278
iPLA2-VIA	0.248687	7.5594	4.67046	0.000512447	3.29035	0.00612545	-0.946523
b	0.248683	8.35522	4.09037	0.00143727	2.84246	0.0131046	-1.99446
CG5131	0.248176	4.20022	3.3658	0.00546592	2.26234	0.0340144	-3.19194
MAN1	0.248025	5.3422	5.69949	9.17153e-05	4.03756	0.00181713	0.867776
COQ7	0.247666	7.1531	6.06848	5.13015e-05	4.28987	0.00121675	1.44902
CG17211	0.247592	-0.652348	0.551422	0.591262	0.22822	0.754292	-5.62576
CG1523	0.246887	4.88561	5.13323	0.000232145	3.63424	0.00348975	-0.0445444
CG5955	0.246831	4.90589	2.13374	0.0537422	1.26968	0.162988	-5.55596
Mes2	0.24673	4.23637	3.45939	0.00459007	2.33818	0.0300777	-3.00902
SdhC	0.246506	9.53987	4.37103	0.00086827	3.06135	0.00907596	-1.43999
CG4553	0.24635	3.88027	2.58235	0.0236646	1.6259	0.0938772	-4.59557
EF-G2	0.246245	3.75188	4.54632	0.000636796	3.196	0.00724773	-0.883644
CG4619	0.246105	6.40117	5.54268	0.000118079	3.92783	0.00212607	0.558524
Cyp305a1	0.246081	6.59081	3.34433	0.00568964	2.24492	0.0350102	-3.43704
CG11835	0.245824	5.66057	3.5174	0.00412011	2.38509	0.0279703	-3.09944
CG8191	0.24574	2.66439	2.96635	0.0115519	1.93735	0.0570908	-3.55802
CG6005	0.245576	3.43231	3.3904	0.00522047	2.28229	0.0329928	-2.96126
Obp56g	0.245487	2.79307	1.5922	0.136804	0.863901	0.305231	-6.4137
Odc2	0.245121	2.03572	1.72783	0.109123	0.962084	0.262636	-5.54318
CG10927	0.244929	0.674611	1.47276	0.166041	0.779784	0.346197	-5.31795
CG4764	0.244875	4.9	5.08544	0.00025159	3.59931	0.00365427	-0.142149
ebd2	0.244845	2.40463	3.76989	0.00258143	2.58814	0.0202641	-1.98257
CG4617	0.244637	3.67367	3.64576	0.00324664	2.48857	0.0237963	-2.54763
EDTP	0.244532	6.52685	5.32777	0.000167882	3.775	0.00274365	0.190618
bsf	0.244467	7.38854	5.44031	0.000139516	3.85538	0.00241208	0.405624
sca	0.244387	2.42953	2.77357	0.016573	1.7806	0.0727996	-3.79219
CG12343	0.243903	4.73412	5.17687	0.000215767	3.66601	0.003307	0.0463468
CG11417	0.243804	4.18199	3.5608	0.00380075	2.42013	0.0264307	-2.8212
CG15027	0.243348	3.30071	2.67646	0.0198655	1.7019	0.0829568	-4.28198
Aph-4	0.243304	5.25197	0.861643	0.405437	0.392077	0.606384	-7.25581
CG17032	0.24319	5.61926	4.4988	0.000692365	3.15967	0.00767903	-1.25714
CG6617	0.243187	5.15198	4.20097	0.00117711	2.92918	0.0113158	-1.76699
ND75	0.243143	10.1659	3.955	0.00183837	2.73557	0.0157555	-2.19722
Rpt3	0.242756	6.6701	5.58427	0.000110388	3.95708	0.00202778	0.631285
Ude	0.242715	5.36428	3.9859	0.00173766	2.76003	0.0151522	-2.1898
CG17221	0.242561	7.15849	4.30049	0.000984681	3.0067	0.00986351	-1.62815
ABCB7	0.24239	6.57953	6.69508	1.99684e-05	4.69966	0.000645774	2.4243
Oseg5	0.242385	0.0282312	1.64212	0.125974	0.89972	0.288994	-5.13758
Tsp42Ef	0.242193	6.73284	5.14472	0.000227712	3.64261	0.0034635	-0.123604
Dhc16F	0.241864	-0.0136656	0.371269	0.71678	0.144614	0.839667	-6.16484
sals	0.241809	8.60958	4.38957	0.000840105	3.07567	0.00887387	-1.43008
Csas	0.241433	4.12301	4.11824	0.00136656	2.86437	0.0127033	-1.73432
Optix	0.241163	-1.07495	0.571632	0.577911	0.238139	0.745843	-5.93092
CG11771	0.240938	7.50695	4.44407	0.000762681	3.11766	0.00826441	-1.3583
CG15617	0.240861	6.66237	2.22505	0.0455916	1.34112	0.147332	-5.47936
SNF1A	0.240654	7.56011	6.10064	4.88128e-05	4.31147	0.00118683	1.50761
CG7441	0.240105	5.4988	2.27848	0.0413795	1.38321	0.138158	-5.33854
dik	0.239984	4.70842	4.07871	0.00146793	2.83329	0.0133234	-1.93742
CG17244	0.23981	5.98815	3.49561	0.00429059	2.36748	0.0288532	-3.14303
CG11334	0.239668	5.39355	5.2244	0.000199302	3.70049	0.00312167	0.0588238
Plip	0.239178	5.10211	5.68025	9.45857e-05	4.02417	0.00182933	0.864957
ferrochelatase	0.239126	6.40783	5.21499	0.000202455	3.69367	0.00313664	-0.00506728
CG3837	0.239008	4.88601	5.81523	7.62799e-05	4.11759	0.0015947	1.13357
CG34411	0.238993	3.92988	5.07546	0.000255858	3.592	0.00370549	-0.00196096
fbl	0.238868	7.19788	3.49113	0.00432654	2.36386	0.028978	-3.14423
CG7632	0.238757	5.45485	5.03767	0.000272732	3.56426	0.0038879	-0.277195
mRpL38	0.23836	5.78751	4.47251	0.000725267	3.1395	0.00798193	-1.31883
sqa	0.237988	8.32182	5.59423	0.000108627	3.96406	0.0020038	0.689049
CG17904	0.237974	5.46739	4.78529	0.000419909	3.37684	0.00532135	-0.728622
CSN7	0.237961	5.21411	5.68257	9.42349e-05	4.02579	0.00182933	0.852466
l(1)G0255	0.237907	8.88936	3.87423	0.00213105	2.67141	0.0177168	-2.38124
Pms2	0.237877	3.03676	2.30661	0.0393141	1.40545	0.133084	-4.88546
eIF6	0.237857	4.72411	4.44358	0.000763339	3.11728	0.00826441	-1.2558
CG12869	0.237773	1.11663	1.01901	0.327903	0.484254	0.535936	-5.94554
CG4603	0.237361	5.61285	5.23755	0.000194984	3.71	0.00306364	0.0587203
CG7083	0.237024	6.45043	5.66344	9.71708e-05	4.01246	0.00187096	0.762438
CG14126	0.236576	1.05148	1.7891	0.0983382	1.00728	0.24439	-4.94122
MED20	0.236472	3.25135	3.24514	0.00684994	2.16431	0.0397512	-3.21557
CG13018	0.236425	3.51547	2.26401	0.0424827	1.37179	0.140821	-5.07524
UGP	0.236222	9.96364	5.1854	0.000212712	3.67221	0.00326518	0.0259943
l(2)k09913	0.235905	8.06881	5.79522	7.87391e-05	4.10381	0.00162907	1.02356
CG15449	0.235893	3.3653	1.78806	0.0985123	1.00651	0.244612	-5.83136
Tgt	0.235496	2.69695	2.61746	0.022171	1.65421	0.0898802	-4.2143
cora	0.235459	9.17566	5.0554	0.000264675	3.57729	0.00381659	-0.219032
MED7	0.235394	4.089	3.32567	0.00589168	2.22976	0.0357968	-3.24586
CG3397	0.235251	4.85307	3.55111	0.00386979	2.41231	0.0268175	-2.93717
UbcD4	0.235081	5.87362	4.79941	0.000409803	3.38742	0.00523768	-0.727989
Hip14	0.234835	6.17891	5.51426	0.000123658	3.90778	0.00221455	0.511424
CG9205	0.234438	5.44985	4.25711	0.00106421	2.97297	0.0104671	-1.68672
tx	0.23442	4.68832	3.31354	0.00602684	2.21991	0.0363027	-3.39181
CG5703	0.234403	9.79587	5.5622	0.000114403	3.94156	0.00208239	0.672364
CG5853	0.234113	6.27017	2.43231	0.0312279	1.50546	0.114032	-5.11576
CG13282	0.234076	1.14789	1.33073	0.20752	0.682939	0.39991	-5.66071
CG2789	0.234028	7.22073	3.2625	0.00663082	2.17843	0.038795	-3.57334
Myd88	0.233866	7.15737	6.35159	3.32743e-05	4.47789	0.00090111	1.90253
CG5214	0.233801	9.20639	4.92441	0.000330664	3.48061	0.00445928	-0.451076
CG4390	0.233524	5.61591	3.01933	0.0104595	1.98049	0.0533003	-4.0181
CG8157	0.233156	2.20101	4.26068	0.00105741	2.97576	0.0104311	-1.22808
pug	0.233131	8.48398	2.09886	0.0572031	1.24258	0.169926	-5.643
CG42669	0.232767	7.73111	4.82059	0.00039511	3.40328	0.00511442	-0.675841
Atg4	0.232672	6.15845	6.98972	1.30478e-05	4.88446	0.000481133	2.87608
CG12001	0.232654	5.84786	5.7965	7.85789e-05	4.10469	0.00162907	0.996121
mthl4	0.232571	1.96665	1.37764	0.192966	0.714519	0.380563	-5.64668
CG3500	0.23248	4.43758	3.16515	0.00795726	2.09924	0.0442745	-3.58359
Mer	0.232427	6.14265	4.90964	0.000339115	3.46965	0.0045426	-0.540532
TfIIA-S	0.232339	5.62951	4.09168	0.00143386	2.84349	0.0130854	-2.01094
CG31706	0.231799	4.68847	3.68138	0.00303955	2.51719	0.0227693	-2.67593
CG1571	0.231611	0.569266	0.509092	0.619734	0.207795	0.773157	-6.09677
CG32628	0.231543	5.67109	2.65946	0.0205044	1.68815	0.0850914	-4.68148
CG33138	0.231453	7.93492	3.5128	0.00415548	2.38138	0.0281721	-3.08566
SA	0.231401	5.76593	4.99089	0.000295251	3.52981	0.0041265	-0.383759
CG9249	0.231145	5.89844	4.66169	0.000520342	3.28371	0.00619021	-0.977871
List	0.231105	4.05356	2.84238	0.0145718	1.83649	0.0668367	-4.12879
Nep1	0.230899	4.02432	2.85863	0.0141351	1.8497	0.0654551	-4.09159
Vha36-3	0.230886	5.78748	2.86293	0.0140217	1.8532	0.0651415	-4.33395
Slimp	0.230503	4.48885	4.47808	0.000718164	3.14378	0.00792996	-1.16754
CG8142	0.229919	3.29951	3.32284	0.00592298	2.22746	0.03585	-3.05217
usp	0.229835	5.79439	4.37219	0.000866472	3.06225	0.00906666	-1.50038
CG14642	0.229682	0.498777	0.795725	0.44134	0.355226	0.637882	-5.96488
CG32548	0.229646	-0.192315	0.165429	0.871305	0.0598297	0.934227	-6.00666
CG32528	0.229632	6.75404	4.78496	0.000420149	3.3766	0.00532135	-0.760788
CG7686	0.229563	7.72151	4.24989	0.00107808	2.96735	0.0105723	-1.70627
Tbp-1	0.229116	6.14599	5.0432	0.000270192	3.56833	0.00386824	-0.303679
CG15144	0.229034	-0.0900786	0.383564	0.707876	0.150043	0.833782	-6.0476
CG17324	0.22897	3.31998	1.86853	0.0857841	1.06659	0.223764	-5.68167
Rtf1	0.22877	6.24976	4.6563	0.000525252	3.27963	0.00624119	-0.995656
CG6023	0.228626	3.45954	4.10341	0.00140372	2.85272	0.0128818	-1.69983
CG8963	0.228625	6.61391	5.20645	0.000205361	3.68748	0.00317673	-0.0179253
CG5919	0.228377	5.59029	5.65723	9.81456e-05	4.00813	0.00187887	0.778251
CG17279	0.22833	-0.0778775	0.948319	0.361302	0.442129	0.565136	-5.63358
CG4230	0.22822	6.79157	5.70841	9.04159e-05	4.04376	0.00180344	0.841154
Ntmt	0.227695	4.27795	3.26258	0.00662982	2.1785	0.038795	-3.39694
CG5731	0.227671	1.79022	1.78551	0.0989432	1.00461	0.245345	-5.32855
Ccap	0.227629	2.14431	2.34429	0.0367001	1.43533	0.127275	-4.50525
Fps85D	0.227509	8.04726	4.69577	0.000490367	3.30948	0.00596136	-0.888199
Prosbeta5	0.227202	7.26152	3.90991	0.00199628	2.69978	0.0168202	-2.35393
dpr12	0.227191	5.63407	3.51071	0.00417169	2.37969	0.0282629	-3.08333
fdl	0.226497	6.55681	6.92751	1.42609e-05	4.84585	0.00051932	2.77869
rho-7	0.226311	5.57314	4.86684	0.000364911	3.43781	0.00480341	-0.595129
CG11984	0.226094	8.32411	4.36904	0.000871346	3.05981	0.0090986	-1.4762
CG4820	0.225984	3.12459	3.06699	0.00956514	2.01931	0.0500966	-3.53898
CG3303	0.225932	5.00426	3.89652	0.0020458	2.68914	0.0171651	-2.3108
Mlf	0.225872	7.0046	7.51104	6.31458e-06	5.19966	0.000294867	3.6468
P5CDh1	0.225792	8.84703	4.58715	0.000592754	3.22713	0.00685577	-1.06389
Kal1	0.225639	2.12802	2.20199	0.047532	1.32301	0.15036	-4.68514
CG12119	0.225536	6.24939	3.02331	0.0103817	1.98373	0.0530935	-4.04044
CG7824	0.225495	4.04609	3.73944	0.00273045	2.56377	0.0210698	-2.45603
Gr61a	0.225397	0.0190682	1.03178	0.322118	0.491985	0.530301	-5.69971
Dhc93AB	0.225035	5.1396	3.249	0.00680055	2.16746	0.0395104	-3.57658
CG12024	0.224707	6.15303	4.63063	0.000549324	3.26017	0.00645812	-1.04227
CG3356	0.22454	6.65761	4.30852	0.000970643	3.01294	0.00981744	-1.63105
CG1582	0.224271	6.04093	3.98956	0.0017261	2.76293	0.0150777	-2.2196
MESR3	0.224245	6.1832	5.44335	0.000138823	3.85754	0.0024099	0.38921
Ugt86De	0.224164	2.61573	2.36025	0.0356442	1.44801	0.124805	-4.70006
CG7627	0.22354	6.0561	5.80992	7.69245e-05	4.11394	0.00160482	1.01522
RpL22	0.223524	7.48943	1.30945	0.214412	0.668751	0.408245	-6.8272
CG11337	0.222987	4.31441	6.55092	2.46935e-05	4.60742	0.000747764	2.38003
CG1516	0.222938	8.9797	3.12096	0.00864456	2.06326	0.0467705	-3.79748
CG10184	0.222923	6.26529	2.53859	0.0256642	1.59067	0.0994812	-4.92832
alrm	0.222866	5.73605	3.67458	0.00307799	2.51173	0.0229712	-2.78028
CG11877	0.22285	5.78368	4.64568	0.000535076	3.27158	0.00632783	-1.00108
Ehbp1	0.222392	8.55024	4.56484	0.000616406	3.21013	0.00706768	-1.11561
CG6686	0.222253	6.25503	8.99664	9.50423e-07	6.02208	7.19513e-05	5.63506
CG6163	0.222226	3.80523	3.35553	0.00557185	2.254	0.034445	-3.11997
xmas-1	0.222171	1.95388	0.823945	0.425724	0.370872	0.624708	-6.49999
Dph5	0.22211	4.17626	3.11069	0.00881262	2.0549	0.0473294	-3.67367
Tip60	0.222088	4.57621	6.28526	3.67901e-05	4.43427	0.000970034	1.91913
CG4882	0.221898	5.37694	4.25959	0.00105949	2.9749	0.0104413	-1.67397
Mhc	0.22176	12.0894	3.61487	0.00343788	2.46371	0.0247334	-2.78672
TSG101	0.221736	7.17901	6.82239	1.65914e-05	4.78012	0.000571718	2.63395
CG7741	0.221331	4.04904	3.48514	0.00437504	2.35902	0.0291659	-2.94375
san	0.221139	5.03589	5.89638	6.71099e-05	4.17321	0.00147155	1.22986
CG7991	0.221097	1.84039	2.24036	0.0443447	1.35316	0.144721	-4.56087
CG8892	0.22088	3.42963	4.03919	0.00157708	2.80215	0.014109	-1.75738
CG10585	0.220848	5.02616	4.12201	0.00135727	2.86733	0.0126764	-1.89516
CG11695	0.220508	4.20897	3.53734	0.00397013	2.4012	0.0273422	-2.87719
CG3597	0.220501	6.29472	2.39265	0.0335891	1.4738	0.120264	-5.18969
HBS1	0.220371	5.31285	4.99908	0.000291176	3.53584	0.00409244	-0.322518
betaTub56D	0.220356	8.82446	3.16139	0.00801363	2.09617	0.0444518	-3.72179
CG42319	0.220326	8.22898	6.87284	1.54261e-05	4.81174	0.000540568	2.73433
CG14722	0.220323	5.57933	6.42604	2.97481e-05	4.52654	0.000854736	2.03502
CG2790	0.220265	5.85027	4.34638	0.00090723	3.04228	0.00936565	-1.55121
CG16989	0.220082	6.54752	2.49483	0.0278281	1.55552	0.105176	-5.00862
ecd	0.22003	5.51136	4.24632	0.00108501	2.96457	0.0106299	-1.71214
nudC	0.22002	4.41588	3.57148	0.00372611	2.42874	0.0261298	-2.82518
CG6197	0.219912	5.46404	4.35909	0.000886919	3.05212	0.00921872	-1.50234
CycK	0.219828	5.40433	6.09265	4.94187e-05	4.30611	0.0011903	1.51529
Pkg21D	0.219801	2.35349	0.875972	0.397899	0.400227	0.599548	-6.40283
Got1	0.219579	8.41347	5.62431	0.000103482	3.98514	0.00194014	0.741131
sens-2	0.219556	2.86767	2.60727	0.0225948	1.64599	0.090971	-4.30915
Lip1	0.219451	-0.114245	1.02446	0.325424	0.48755	0.533897	-5.62363
CG11926	0.219303	5.08355	4.97302	0.000304362	3.51661	0.0042126	-0.357794
alpha-Est4	0.218946	2.26723	1.90218	0.0809193	1.09195	0.215749	-5.22843
l(2)06496	0.2188	4.8234	3.86306	0.00217516	2.66251	0.0179343	-2.36384
Nos	0.218711	3.61134	2.76345	0.0168892	1.77239	0.0737088	-4.19091
CG7582	0.218519	3.4672	2.44398	0.0305643	1.51479	0.11229	-4.7171
Sod3	0.218508	5.75168	6.11842	4.74914e-05	4.32339	0.00117471	1.53031
CG42675	0.218497	4.70248	2.38812	0.0338692	1.4702	0.120985	-5.09233
CG9723	0.2184	3.6214	2.28285	0.0410523	1.38666	0.13734	-5.02423
Toll-7	0.218236	4.15467	2.26783	0.0421885	1.37481	0.140156	-5.14239
CG12484	0.21823	5.52527	3.08335	0.00927624	2.03263	0.0491242	-3.89307
CG9192	0.218058	2.55951	1.86257	0.0866733	1.06211	0.225026	-5.52936
CG4400	0.218058	5.55956	3.98258	0.00174821	2.75741	0.0151911	-2.20975
Fhos	0.218029	10.346	1.95758	0.0734568	1.13397	0.202422	-5.83446
CG3014	0.217895	2.41764	0.989669	0.341484	0.46663	0.547745	-6.32501
CG5989	0.217862	5.32054	4.36774	0.000873364	3.0588	0.00911015	-1.47355
Adgf-D	0.217346	5.93737	2.15735	0.0515126	1.28809	0.158082	-5.57493
Rip11	0.217343	7.25315	4.30183	0.000982332	3.00774	0.00986351	-1.62848
baf	0.217298	5.45894	4.11451	0.00137581	2.86144	0.0127413	-1.95354
CG18853	0.217175	3.95474	3.69785	0.00294841	2.53041	0.0223208	-2.52516
AP-47	0.216736	5.75079	4.56299	0.000618416	3.20872	0.00707885	-1.14863
Pink1	0.216523	9.53092	3.89401	0.00205521	2.68714	0.0172008	-2.32602
CG1597	0.216508	5.54539	2.576	0.0239454	1.62078	0.0946168	-4.81213
CG9531	0.21619	3.48103	2.96434	0.0115955	1.93571	0.0572217	-3.77504
CycG	0.216121	9.96125	7.07359	1.1583e-05	4.93618	0.00044519	3.0808
Cyp313a4	0.216115	0.162101	1.12151	0.283578	0.547327	0.489598	-5.58986
CG1910	0.215981	5.97738	5.49165	0.000128294	3.89179	0.0022651	0.47962
CG10178	0.215915	5.17867	3.05739	0.00973896	2.01149	0.0506299	-3.90541
Tcp-1zeta	0.215888	6.44931	5.36549	0.000157752	3.80203	0.00263533	0.255546
mfrn	0.21585	7.04608	6.08296	5.01652e-05	4.2996	0.0012019	1.46766
CG34150	0.21569	6.53263	3.18154	0.00771667	2.11257	0.0433173	-3.74349
CG14207	0.215637	8.41354	5.3763	0.000154969	3.80976	0.00261148	0.31911
ome	0.215615	6.57843	3.58487	0.00363459	2.43954	0.0256139	-2.98445
Tango4	0.215549	3.84626	3.08589	0.00923207	2.0347	0.0489942	-3.64075
GstD9	0.215518	5.46878	3.11031	0.00881897	2.05458	0.0473294	-3.83887
CG17652	0.215264	3.56153	2.82422	0.0150755	1.82173	0.0681055	-4.07422
BM-40-SPARC	0.215094	7.45934	2.36321	0.0354515	1.45037	0.124349	-5.21905
CG11447	0.214581	4.84988	3.85302	0.0022156	2.65451	0.0181034	-2.38243
CG8449	0.214483	5.57105	3.37703	0.00535248	2.27145	0.0335344	-3.34443
ema	0.214482	6.82588	4.9623	0.000309968	3.50868	0.00425483	-0.444924
CG9705	0.21441	6.5155	4.09555	0.00142385	2.84654	0.013006	-2.02689
sprt	0.21415	6.6138	4.51973	0.000667288	3.17569	0.00751771	-1.23836
CG14641	0.213575	5.33033	4.92012	0.000333091	3.47744	0.00448596	-0.469895
aret	0.213555	7.20389	2.14929	0.0522637	1.2818	0.159863	-5.60253
l(1)G0007	0.2135	5.24831	3.29161	0.00627925	2.20209	0.0374099	-3.47285
CG7791	0.213365	6.5664	5.31834	0.00017052	3.76822	0.00276176	0.175408
CG8042	0.213008	6.0662	4.00051	0.00169203	2.77159	0.014832	-2.20025
CG5958	0.212936	6.24815	1.79948	0.0966086	1.01498	0.241413	-6.17276
lama	0.212905	8.2013	3.92708	0.00193456	2.71342	0.0164248	-2.30203
c12.2	0.212878	6.14539	5.37205	0.000156056	3.80672	0.0026219	0.270104
CG15923	0.212753	2.24734	2.32648	0.0379143	1.4212	0.129797	-4.69692
Doa	0.212713	9.40059	4.68134	0.000502835	3.29857	0.00606132	-0.883348
CG6231	0.212452	6.40211	5.68101	9.44707e-05	4.0247	0.00182933	0.791876
CG42271	0.212387	5.62144	3.26888	0.00655207	2.18362	0.0384468	-3.55548
CG7183	0.212301	3.71575	2.61009	0.0224768	1.64827	0.0906898	-4.48012
Cyp18a1	0.211884	3.81036	2.57638	0.0239282	1.62109	0.0945866	-4.56016
Spn88Eb	0.211864	4.84589	1.03394	0.321148	0.493295	0.529409	-7.05179
rdhB	0.211437	1.06289	0.872733	0.399594	0.398381	0.601287	-6.11255
IntS4	0.211398	4.45524	3.11576	0.00872932	2.05902	0.0470999	-3.69603
fln	0.210616	8.25553	1.97924	0.0707146	1.15049	0.197232	-5.85377
CG1126	0.210598	0.624368	1.74629	0.105768	0.975647	0.256725	-5.17663
eIF2B-gamma	0.210568	5.07755	4.18913	0.00120247	2.91993	0.0115319	-1.76941
bel	0.210404	7.35973	5.97167	5.96394e-05	4.22447	0.00134532	1.29292
CG6439	0.210397	9.50073	4.78153	0.000422645	3.37402	0.0053423	-0.696248
grk	0.210258	7.04135	4.89722	0.000346398	3.46042	0.0046154	-0.553261
CG3008	0.210093	6.39023	4.91753	0.000334573	3.47551	0.0044938	-0.527923
DNApol-alpha60	0.210089	0.342352	0.956331	0.3574	0.446845	0.562441	-5.82247
CG4213	0.210065	7.86376	3.214	0.00726124	2.13899	0.0414401	-3.65396
Lapsyn	0.209994	4.53118	4.84808	0.000376858	3.42382	0.00492925	-0.526485
CG12304	0.209743	5.66425	4.16212	0.00126245	2.89879	0.0119921	-1.88678
CG12081	0.209689	4.35344	3.48704	0.00435961	2.36055	0.0291409	-2.98359
CG5792	0.209596	6.11903	5.60736	0.000106349	3.97326	0.00197171	0.670182
Rpt4	0.209332	6.36775	3.79206	0.00247819	2.60586	0.0197013	-2.59459
mspo	0.209238	4.98606	2.94443	0.0120363	1.91951	0.0589603	-4.09644
Dcp1	0.209073	4.25703	3.03673	0.0101236	1.99466	0.0521471	-3.81454
CG14785	0.208803	1.6884	0.73296	0.477377	0.321139	0.667939	-6.37313
Lk	0.208753	4.99011	2.27321	0.0417785	1.37905	0.139164	-5.30703
betaTub97EF	0.208524	6.939	4.69505	0.000490986	3.30893	0.00596163	-0.920524
CG31832	0.208373	1.23533	0.637849	0.535315	0.271391	0.713815	-6.34538
v(2)k05816	0.208373	7.07157	0.735238	0.476037	0.322359	0.666813	-7.43849
CG5555	0.208334	4.85094	3.49721	0.00427789	2.36877	0.0287872	-3.0362
sano	0.208276	6.45054	3.1192	0.00867311	2.06183	0.0468742	-3.86011
ntc	0.208194	5.30385	3.94195	0.00188271	2.72522	0.0160402	-2.25207
slx1	0.208158	1.10285	1.20987	0.249162	0.603518	0.448869	-5.76864
CG5913	0.208082	5.16528	3.6092	0.00347422	2.45914	0.0248518	-2.87573
alphaTub84B	0.207962	9.81181	3.51865	0.00411053	2.3861	0.0279623	-3.02287
CG5195	0.207782	2.72517	0.524948	0.60899	0.21539	0.766936	-6.95493
Thiolase	0.207739	7.76481	3.05698	0.00974651	2.01115	0.0506299	-3.94377
CG2816	0.207715	1.90132	1.90371	0.0807051	1.0931	0.215465	-5.26614
CG7492	0.207644	6.77812	4.9819	0.000299799	3.52317	0.00417837	-0.408496
CG10824	0.207196	6.27901	2.15079	0.0521232	1.28297	0.159628	-5.6039
CG1636	0.206863	7.44884	6.11092	4.80444e-05	4.31836	0.0011802	1.52487
CG14118	0.206709	2.17787	1.76596	0.102294	0.990148	0.250854	-5.42881
CG18616	0.206663	4.66553	3.33464	0.00579366	2.23705	0.035393	-3.31832
CG13332	0.206424	-0.43809	1.22735	0.242758	0.614827	0.441355	-5.53942
CG31313	0.206382	7.73045	4.74978	0.000446499	3.35018	0.00554958	-0.79082
CG8360	0.20638	5.64935	3.76007	0.00262856	2.58028	0.020524	-2.63234
MP1	0.206322	6.56288	3.67589	0.00307056	2.51278	0.0229417	-2.81107
CG13436	0.206175	1.08993	0.475463	0.642824	0.191908	0.78877	-6.35875
CG8129	0.206166	5.58404	2.75191	0.0172574	1.76303	0.0746725	-4.50831
CG7433	0.205942	7.41598	5.56754	0.000113418	3.94532	0.00206822	0.619362
CG13912	0.20594	4.54635	3.06211	0.00965315	2.01533	0.0503995	-3.80592
CG10131	0.205902	3.90123	1.88782	0.0829644	1.08111	0.219039	-5.77999
IntS8	0.205817	4.50523	5.50497	0.000125541	3.90121	0.00223227	0.640211
form3	0.205673	8.41902	3.43948	0.00476364	2.32206	0.030851	-3.2084
Cpr66D	0.205485	5.57357	1.50879	0.156707	0.804911	0.332903	-6.57891
CG6276	0.205476	4.91634	3.21199	0.00728862	2.13735	0.0415489	-3.59146
CG10914	0.205282	3.14846	1.91683	0.0788818	1.10302	0.212643	-5.474
CG3857	0.205203	7.66912	2.25267	0.0433656	1.36285	0.142905	-5.39443
RhoGAP5A	0.205008	3.31899	3.03546	0.0101479	1.99362	0.0522453	-3.62058
Rgl	0.204996	6.07153	4.96642	0.000307799	3.51173	0.00424488	-0.439197
CG10565	0.204577	7.0732	5.45764	0.000135616	3.86769	0.00237341	0.425137
CG42337	0.204297	5.33931	3.83962	0.00227077	2.64383	0.0184787	-2.43945
park	0.204175	4.24991	4.57258	0.000608089	3.21603	0.00701622	-0.953446
cbt	0.20407	7.24117	2.51832	0.0266454	1.57438	0.102057	-4.94039
Tret1-1	0.204007	9.61157	4.74118	0.000453201	3.34371	0.00561195	-0.76765
Asph	0.203717	9.093	4.21584	0.00114604	2.9408	0.0110758	-1.73683
CG7706	0.203713	3.53659	2.97237	0.0114223	1.94225	0.0566465	-3.7772
CG18519	0.203674	0.126885	0.98761	0.342452	0.4654	0.548494	-5.75491
CG9231	0.203451	8.05255	3.37795	0.00534333	2.27219	0.0335344	-3.33608
CG7332	0.202698	5.854	5.73733	8.63347e-05	4.06381	0.00174644	0.898238
Mcm2	0.202676	1.4875	1.97024	0.0718426	1.14362	0.199535	-4.93939
CG3386	0.202209	3.79998	4.0957	0.00142345	2.84666	0.013006	-1.73246
Doc1	0.202016	-0.185596	0.730942	0.478564	0.32006	0.669039	-5.87096
Art7	0.201959	4.05183	3.49844	0.00426809	2.36977	0.0287406	-2.89809
CG5849	0.201953	4.41452	2.59281	0.0232097	1.63433	0.0928372	-4.62274
CG4239	0.201887	7.51656	5.3467	0.000162714	3.78857	0.00268318	0.250236
Pde11	0.201755	7.28621	4.59368	0.000586011	3.23209	0.00679351	-1.09219
CG8128	0.201456	6.57354	4.29359	0.000996905	3.00135	0.00994704	-1.65951
CG9629	0.201174	5.66727	3.51916	0.00410662	2.38652	0.0279623	-3.07243
pn	0.200988	5.0973	4.80434	0.000406331	3.39112	0.00521911	-0.656166
Pgk	0.200944	9.07813	3.07262	0.00946477	2.02389	0.0497797	-3.88562
CG8248	0.200705	1.86736	2.01781	0.0660643	1.18003	0.188731	-4.92418
CG12768	0.200697	3.80926	2.52085	0.0265212	1.57641	0.101777	-4.66598
C15	0.200543	0.199997	1.17567	0.262073	0.581578	0.464838	-5.4732
CG6767	0.200495	8.53408	2.8755	0.0136957	1.86342	0.0641337	-4.26375
Iap2	0.200476	7.21878	5.42145	0.000143892	3.84196	0.00247489	0.367521
mst	0.20039	2.41762	2.96321	0.0116199	1.9348	0.0572908	-3.52504
CG2006	0.200348	3.02823	2.76846	0.016732	1.77645	0.0731739	-4.03906
CG4433	0.200277	6.11338	4.97307	0.000304334	3.51665	0.0042126	-0.42438
tau	0.199974	7.37855	4.75356	0.000443591	3.35302	0.00552719	-0.802617
CG8297	0.199897	4.27478	3.61183	0.00345732	2.46126	0.0248019	-2.74242
CG30085	0.199897	2.82205	2.32223	0.0382097	1.41783	0.130437	-4.75597
CG17124	0.199839	7.79329	4.16841	0.00124821	2.90371	0.0119021	-1.85828
CG12163	0.199808	8.85045	4.46159	0.000739405	3.13112	0.00808217	-1.29361
mag	0.199754	-0.264694	0.122251	0.904683	0.0435037	0.951827	-5.79448
Ipk1	0.199745	3.54397	2.1079	0.0562873	1.24959	0.168141	-5.35235
Unc-89	0.199215	10.3179	3.21513	0.00724596	2.1399	0.0414002	-3.58631
Gbeta5	0.199205	4.06715	3.01143	0.0106156	1.97406	0.053958	-3.81796
Gl	0.199176	7.26558	5.13596	0.000231085	3.63623	0.00348827	-0.125972
Ir76b	0.199172	0.279251	1.70364	0.113664	0.944375	0.269105	-5.38236
CG31033	0.198913	4.7956	3.46178	0.00456963	2.34012	0.0299893	-3.09972
CG7154	0.198897	4.71318	4.51778	0.000669592	3.17419	0.00751849	-1.12913
CR9162	0.19883	-0.0958622	1.04358	0.316838	0.499162	0.525505	-5.61671
Tpc1	0.198817	4.98813	4.34182	0.000914634	3.03875	0.00940323	-1.47624
Dgkepsilon	0.198733	5.88793	4.30451	0.000977622	3.00983	0.00983257	-1.62717
unpg	0.198702	3.37992	2.16937	0.0504106	1.29748	0.155808	-5.20046
CG9547	0.198583	4.70952	3.89523	0.00205065	2.68811	0.0171914	-2.28761
VhaM9.7-c	0.198403	5.43922	4.75796	0.000440221	3.35633	0.00549204	-0.777026
CG13631	0.198387	5.5997	3.39575	0.00516858	2.28663	0.0327518	-3.31613
CG1826	0.198299	5.51831	4.46234	0.000738424	3.13169	0.00808217	-1.3114
CG16912	0.198197	4.51058	3.17653	0.00778941	2.1085	0.0435588	-3.57201
Tango9	0.198119	6.52288	4.81273	0.000400497	3.3974	0.00517075	-0.715376
ND42	0.198044	8.68466	3.6623	0.00314873	2.50186	0.0233422	-2.78574
CG4557	0.19798	5.67168	3.57511	0.00370106	2.43167	0.0260089	-2.98224
dalao	0.197899	4.69338	3.03276	0.0101993	1.99143	0.052402	-3.89483
CG7053	0.197746	5.88727	3.91432	0.00198024	2.70328	0.0167274	-2.35377
AdoR	0.197577	2.60199	1.5422	0.148455	0.828406	0.320758	-5.88323
mab-21	0.19757	4.52755	2.75996	0.0169998	1.76956	0.073957	-4.37684
dpr2	0.197563	2.17749	1.77951	0.0999599	1.00017	0.246886	-5.40744
CG9246	0.19755	4.19616	4.6769	0.000506735	3.29522	0.00608818	-0.732791
mmy	0.197482	6.4308	2.25804	0.0429453	1.36708	0.141962	-5.42379
CG43986	0.197201	2.17953	1.89603	0.0817903	1.0873	0.216978	-5.25458
CG6287	0.197091	8.14203	4.00533	0.00167725	2.7754	0.0147672	-2.15321
CG2118	0.196668	4.8074	3.11457	0.0087488	2.05805	0.0471548	-3.73297
CG7115	0.196663	8.15385	4.39069	0.000838429	3.07653	0.00886605	-1.43701
CG8369	0.19665	7.38887	3.69294	0.00297527	2.52647	0.0224901	-2.75771
CG3777	0.196595	2.46348	1.94836	0.0746531	1.12695	0.204779	-5.17451
Ercc1	0.196313	1.37935	1.32385	0.209727	0.678345	0.402497	-5.75652
Hn	0.195972	8.85261	3.29073	0.00628956	2.20138	0.0374116	-3.47968
shark	0.19592	4.55468	2.9976	0.0108944	1.9628	0.0549282	-3.9479
Su(P)	0.195875	6.25336	4.73268	0.000459933	3.33731	0.00567913	-0.858777
CG5946	0.195663	8.44006	3.06863	0.00953585	2.02064	0.0500219	-3.906
wnd	0.195614	5.63156	5.62808	0.000102856	3.98777	0.00193567	0.731725
qtc	0.195479	6.08676	5.33053	0.000167117	3.77698	0.00274365	0.201619
Fem-1	0.195469	6.70633	3.81083	0.0023941	2.62086	0.0192471	-2.55819
CHMP2B	0.195413	4.76765	3.56161	0.003795	2.42079	0.0264307	-2.92041
Lon	0.195313	7.09427	4.8662	0.000365315	3.43733	0.00480341	-0.609739
CG11597	0.195098	2.23654	1.95817	0.0733806	1.13442	0.202287	-5.16702
CG33491	0.19475	1.07277	1.10289	0.291272	0.535701	0.498149	-5.95547
Arc1	0.194683	10.0535	0.633687	0.537939	0.269267	0.715319	-7.44437
CG4769	0.194033	10.1523	3.4465	0.00470171	2.32774	0.0305687	-3.15203
CG14818	0.19396	6.16747	3.26164	0.00664151	2.17773	0.038812	-3.59333
Obp18a	0.193843	4.81811	3.38065	0.00531644	2.27438	0.0333923	-3.25931
magu	0.1938	6.98274	4.18026	0.00122184	2.91299	0.0116952	-1.86243
Sas-4	0.193757	2.59195	2.73732	0.0177339	1.7512	0.0760953	-3.92746
CG34340	0.193659	3.21777	2.74054	0.0176276	1.75381	0.0757971	-4.11073
l(2)tid	0.193657	6.07901	3.43481	0.00480526	2.31828	0.0310295	-3.26318
CG8613	0.193657	8.09603	3.5482	0.0038908	2.40996	0.0269375	-3.01667
CG4858	0.193569	5.23606	3.39896	0.00513772	2.28923	0.0326183	-3.28431
CG6488	0.193515	4.34715	3.90501	0.00201427	2.69588	0.0169366	-2.19317
Swim	0.193443	5.48532	1.80385	0.0958889	1.01823	0.240215	-6.13284
CG15618	0.19343	3.74458	2.92634	0.0124515	1.90478	0.0601974	-3.90352
CG8503	0.193236	3.01316	2.1963	0.0480232	1.31855	0.150968	-5.01893
CG11788	0.193065	2.37473	2.86228	0.0140389	1.85267	0.0651808	-3.65996
CG42324	0.193032	6.05704	3.95609	0.00183474	2.73643	0.0157378	-2.28074
Mmp2	0.192747	4.85368	3.71679	0.00284705	2.54561	0.021718	-2.62899
CG31189	0.192351	3.91562	2.7311	0.0179411	1.74615	0.0766503	-4.32773
cher	0.192236	8.47449	3.85597	0.00220364	2.65686	0.0180562	-2.42386
CG18004	0.192151	3.35849	2.56941	0.0242398	1.61547	0.0955537	-4.47231
Npc2a	0.192084	5.68956	3.22909	0.00705892	2.15126	0.0407039	-3.63919
CG3149	0.191979	5.60919	3.33603	0.00577867	2.23817	0.0353405	-3.42604
CG1827	0.191721	4.37502	2.20651	0.047146	1.32655	0.149851	-5.2993
CG3815	0.191656	3.85693	2.32168	0.0382477	1.41739	0.130491	-5.03115
CG12203	0.19163	7.89401	2.70834	0.0187192	1.72771	0.0790288	-4.58702
bocksbeutel	0.191586	4.51015	3.88305	0.0020969	2.67842	0.017491	-2.2501
CG13148	0.191475	0.874468	0.861754	0.405378	0.39214	0.606384	-6.03211
CG5498	0.191446	5.72075	2.97365	0.0113948	1.94329	0.0566228	-4.11446
osm-6	0.191412	-0.0870805	1.27837	0.224813	0.648178	0.420625	-5.58207
sws	0.19135	7.99818	4.67176	0.000511295	3.29133	0.00611982	-0.932656
ems	0.191166	2.57443	1.63266	0.127966	0.892906	0.292222	-5.95969
CG9536	0.191068	5.45857	4.601	0.000578545	3.23766	0.00671475	-1.05981
CG9853	0.190748	5.47688	5.75221	8.43109e-05	4.07412	0.00172647	0.951765
CG3281	0.190403	3.82851	3.79457	0.00246679	2.60787	0.0196576	-2.29881
CG7338	0.190291	5.76336	3.73019	0.0027775	2.55635	0.0213668	-2.69607
Rab40	0.190066	4.85115	3.28562	0.00634998	2.19723	0.0376143	-3.44897
Nup62	0.189891	4.52678	3.00182	0.0108086	1.96623	0.054551	-3.92989
CG10874	0.189883	5.26982	4.80973	0.000402574	3.39515	0.00518417	-0.665222
Bap	0.189726	6.58821	4.56454	0.000616734	3.2099	0.00706768	-1.16262
CG11257	0.189665	3.36349	3.04821	0.00990816	2.00401	0.0512751	-3.57544
Pect	0.189569	7.96678	4.6383	0.000542011	3.26599	0.00639471	-0.990936
CG14232	0.18946	4.46042	2.91933	0.0126161	1.89907	0.0607289	-4.07543
CG14341	0.189448	3.21422	3.29476	0.00624235	2.20465	0.0372639	-3.11886
CG30118	0.189282	9.51629	4.77533	0.000427199	3.36937	0.00536981	-0.709531
blw	0.189268	11.139	3.48809	0.00435107	2.3614	0.0291227	-3.04985
mRpL24	0.189199	5.83667	5.85184	7.19893e-05	4.14273	0.00152413	1.08628
CG8620	0.189182	2.67682	1.40373	0.185241	0.732263	0.370948	-6.19304
nimB5	0.189164	4.51495	2.14162	0.0529885	1.27582	0.161437	-5.46368
CG11158	0.188923	4.02657	2.83178	0.0148637	1.82787	0.0677303	-4.15233
CG14238	0.188876	0.34935	1.25707	0.23217	0.634194	0.429246	-5.67819
eco	0.188646	5.51934	4.25475	0.00106872	2.97113	0.0105012	-1.6874
CG17982	0.188515	3.20667	3.09988	0.00899305	2.04609	0.047955	-3.47211
CG6364	0.188476	6.32473	4.53882	0.000645248	3.19027	0.00730788	-1.21008
Pgi	0.188194	9.57264	3.58878	0.00360831	2.4427	0.0255111	-2.90361
CG7967	0.188184	5.88401	5.87384	6.95337e-05	4.1578	0.00148914	1.12148
CG3448	0.188041	3.2546	3.30462	0.00612825	2.21266	0.0367508	-3.08724
CG6758	0.187919	4.51583	3.49893	0.00426418	2.37016	0.0287336	-2.97788
CAHbeta	0.187806	4.36909	2.44265	0.0306392	1.51372	0.112483	-4.94368
CG11596	0.187781	5.1981	4.60105	0.000578495	3.2377	0.00671475	-1.0347
CG10365	0.187693	7.11102	3.58673	0.00362211	2.44104	0.025562	-2.967
Mal-B2	0.187394	7.69303	1.39475	0.187869	0.726144	0.374047	-6.72206
CG14964	0.187265	7.81192	3.88658	0.00208338	2.68123	0.0174074	-2.3847
CG9951	0.187183	4.56963	2.97404	0.0113864	1.94361	0.0566228	-3.98155
Bx42	0.187131	5.15741	3.88332	0.00209586	2.67864	0.017491	-2.3549
CG7789	0.18704	4.21497	3.0569	0.00974801	2.01108	0.0506299	-3.77341
CG4447	0.186985	2.69712	2.66191	0.0204111	1.69013	0.0848101	-4.13197
CG6656	0.186864	6.27832	5.45424	0.000136373	3.86527	0.00238247	0.407808
dare	0.186853	4.73758	3.72505	0.00280393	2.55223	0.0215151	-2.585
mthl5	0.186778	3.37241	2.03406	0.0641923	1.19252	0.184809	-5.46161
twf	0.186718	4.10548	2.88261	0.0135144	1.8692	0.0635526	-4.07907
VhaSFD	0.186654	8.7228	5.63019	0.000102506	3.98925	0.00193567	0.760667
eIF5B	0.186624	7.11673	6.11319	4.78759e-05	4.31988	0.0011802	1.51723
CG6607	0.186526	4.50787	4.30027	0.000985067	3.00653	0.00986351	-1.49588
Arp11	0.186506	4.87443	3.15703	0.00807935	2.09262	0.0446933	-3.69402
CG6353	0.186451	4.20544	2.90704	0.0129099	1.88908	0.0616061	-4.03754
CSN4	0.186296	5.09744	3.67017	0.00310321	2.50819	0.0230903	-2.7401
Pglym78	0.186248	8.40029	3.0735	0.00944917	2.02461	0.0497514	-3.90237
CG7054	0.186218	5.22586	2.43112	0.0312962	1.50451	0.114173	-5.04834
aos	0.18618	5.48132	4.11895	0.00136479	2.86493	0.0127033	-1.96343
Rep	0.186019	4.11015	3.6835	0.00302765	2.51889	0.0227142	-2.57259
CG14655	0.185945	5.61862	2.82688	0.0150006	1.82389	0.0680749	-4.38173
arg	0.185922	1.8891	0.776955	0.45193	0.344929	0.647196	-6.49355
up	0.185896	10.6676	4.96486	0.000308619	3.51058	0.00424488	-0.337802
rb	0.185855	7.10769	4.36439	0.000878584	3.05622	0.00915505	-1.51337
CG9215	0.185826	3.32566	3.87899	0.00211256	2.67519	0.0175923	-2.04452
CG9733	0.185634	2.28207	1.44959	0.172289	0.763742	0.354768	-6.14163
CG14411	0.185497	5.82096	3.85404	0.00221146	2.65532	0.0180844	-2.46693
Ppi1	0.185432	-0.141708	0.0507032	0.96038	0.0175571	0.980193	-5.70538
CG1773	0.185251	2.8789	1.68635	0.117011	0.931775	0.274348	-5.77193
sra	0.184988	6.86048	4.25214	0.00107374	2.9691	0.0105402	-1.72865
FKBP59	0.184884	5.87611	3.06555	0.00959112	2.01813	0.0501802	-3.94703
dyn-p25	0.184866	3.81142	2.95077	0.0118941	1.92467	0.0583524	-3.87569
Rpn2	0.18477	7.36991	3.61852	0.00341468	2.46665	0.0246197	-2.90139
CG2685	0.184447	3.73958	3.85654	0.00220133	2.65732	0.0180562	-2.17227
Tm2	0.184425	9.43666	5.37184	0.000156112	3.80656	0.0026219	0.33969
GXIVsPLA2	0.184348	5.84176	4.51863	0.00066859	3.17484	0.00751849	-1.24
nimB2	0.18412	7.8165	1.72533	0.109585	0.96025	0.263152	-6.25956
CG9458	0.184045	3.84301	0.683673	0.506909	0.29507	0.69304	-6.99768
shrb	0.183879	7.25018	3.59772	0.00354896	2.4499	0.0252353	-2.94301
Klp64D	0.183773	5.6608	4.11225	0.00138144	2.85967	0.0127468	-1.96858
CG10185	0.18346	3.85659	1.95992	0.073156	1.13575	0.20178	-5.76805
Alk	0.183457	7.27862	1.92234	0.0781271	1.1072	0.2114	-5.9702
Pmm45A	0.183294	5.5376	2.29153	0.0404084	1.39353	0.135841	-5.32885
RNaseX25	0.183022	6.42284	5.82034	7.56647e-05	4.12111	0.00158848	1.02453
CG42719	0.182755	-0.113567	1.04993	0.314024	0.503037	0.522311	-5.49361
Rpn3	0.182746	6.40578	2.66251	0.0203884	1.69062	0.084751	-4.70626
Trc8	0.182742	6.53634	3.1618	0.00800743	2.09651	0.0444518	-3.7813
m2	0.182629	0.427882	1.12514	0.282094	0.549606	0.488132	-5.69483
CG3224	0.182606	5.02301	3.52476	0.00406411	2.39103	0.0277597	-3.02532
CG3793	0.182467	4.92803	4.42317	0.00079146	3.10157	0.00850664	-1.32068
cdi	0.182412	7.46837	4.95502	0.000313836	3.5033	0.00428438	-0.443236
CG8602	0.182247	6.92587	3.62198	0.00339286	2.46943	0.0245687	-2.90838
Atac1	0.182239	2.57027	3.09633	0.00905323	2.0432	0.0482501	-3.22869
l(1)G0156	0.182226	9.24084	4.31779	0.000954714	3.02013	0.00973516	-1.54924
CG13601	0.182218	4.63404	2.86181	0.0140513	1.85228	0.0651881	-4.20516
CG4984	0.181969	3.6695	3.0729	0.00945981	2.02412	0.0497797	-3.59831
Or63a	0.181966	1.59599	1.30547	0.215724	0.666102	0.40999	-5.84702
CG5028	0.181845	9.98058	5.26217	0.00018716	3.72779	0.00296871	0.164921
Vps20	0.181707	5.22343	3.00789	0.0106863	1.97117	0.0541799	-4.00756
CG3568	0.181679	3.39983	2.06516	0.0607437	1.2165	0.177126	-5.34763
pix	0.18145	8.19251	3.91508	0.00197748	2.70389	0.0167183	-2.31973
ppk10	0.181322	1.10813	2.22775	0.0453691	1.34324	0.14696	-4.78426
CG6412	0.181289	6.17748	3.89431	0.00205409	2.68738	0.0172008	-2.40233
CG14223	0.181266	2.69476	1.48645	0.16244	0.789306	0.340809	-6.08146
CG12817	0.1812	1.72223	1.40201	0.185743	0.731087	0.371598	-5.70965
CG3040	0.18112	5.34765	3.48525	0.00437418	2.3591	0.0291659	-3.13109
CG13163	0.18109	3.44154	2.13268	0.0538445	1.26886	0.163249	-5.24695
mRpL37	0.180789	5.18438	3.80125	0.00243666	2.6132	0.0195265	-2.51628
CG8549	0.180584	4.86523	3.55407	0.0038486	2.4147	0.0267077	-2.93702
CG6225	0.180479	7.02393	4.44515	0.000761226	3.11849	0.00825943	-1.36767
CG4927	0.180206	2.9529	2.2851	0.0408848	1.38844	0.136957	-4.80159
obst-E	0.180098	3.63899	2.10331	0.0567506	1.24603	0.169084	-5.32711
CG11876	0.180088	8.20514	2.78467	0.0162327	1.78961	0.0718713	-4.44126
CG6428	0.179926	4.81832	3.11029	0.00881923	2.05457	0.0473294	-3.74886
Gas41	0.179804	2.93712	2.86211	0.0140433	1.85253	0.0651808	-3.82741
Drep-4	0.179634	4.46116	2.74376	0.017522	1.75642	0.0756032	-4.38185
DNApol-alpha50	0.179551	1.95348	1.78281	0.0993996	1.00262	0.246232	-5.33438
CG32278	0.179372	6.103	3.76527	0.0026035	2.58444	0.0203893	-2.64341
Bzd	0.179365	3.74063	3.22537	0.0071083	2.14823	0.0408472	-3.36125
Fmo-1	0.179335	3.73313	2.2295	0.0452256	1.34462	0.14664	-5.1816
Syx13	0.179321	5.02208	4.16364	0.00125898	2.89998	0.0119801	-1.80943
CG42666	0.179315	5.29416	3.12049	0.00865227	2.06287	0.0467869	-3.79129
CG6523	0.179292	5.48036	3.09438	0.00908627	2.04161	0.0483746	-3.8723
Pxn	0.17922	5.8193	1.23597	0.239648	0.620425	0.438503	-6.91641
CG15753	0.17921	2.41012	1.5664	0.142714	0.845535	0.313713	-5.76204
CG13220	0.179153	6.32813	3.22667	0.00709102	2.14929	0.0408183	-3.65949
CG12929	0.179153	1.88958	1.25137	0.234172	0.630466	0.431828	-6.06301
Ef1alpha100E	0.179124	9.90443	3.5429	0.00392929	2.40569	0.027117	-2.97344
CG14007	0.179111	-0.775752	1.27792	0.224966	0.647884	0.420831	-5.58953
Scp2	0.179013	5.91936	2.65028	0.0208579	1.68073	0.085987	-4.71071
CG13931	0.178958	0.202564	0.856993	0.407904	0.389442	0.607932	-5.92861
Shc	0.178933	4.49168	3.69126	0.00298451	2.52513	0.0225198	-2.64254
CG4611	0.178746	4.61533	3.72018	0.00282924	2.54833	0.0216436	-2.58839
Rrp4	0.178656	3.69376	2.31955	0.0383965	1.41571	0.130731	-5.00881
HtrA2	0.17858	5.1416	3.52734	0.00404466	2.39312	0.0277027	-3.01479
CG14074	0.178535	1.88756	1.84863	0.0887853	1.05166	0.228596	-5.20463
gig	0.178318	5.88173	4.04936	0.00154822	2.81017	0.0139006	-2.09562
Aats-met	0.178249	3.01952	2.97889	0.0112834	1.94756	0.0564059	-3.61047
skap	0.17813	9.93039	4.50422	0.000685787	3.16381	0.00763998	-1.18866
su(r)	0.17783	5.49944	2.29905	0.0398588	1.39948	0.134337	-5.30665
capu	0.177818	5.9331	1.42823	0.178223	0.749035	0.36221	-6.68732
CG32344	0.177721	4.01353	2.89828	0.0131236	1.88195	0.0622998	-4.00448
CG6432	0.177695	3.3598	0.511282	0.618244	0.20884	0.772458	-7.042
CG4546	0.177661	1.54718	0.187099	0.854647	0.0682134	0.924293	-6.7236
Wdr82	0.177508	4.17507	4.20149	0.00117601	2.92959	0.0113158	-1.61136
Mlp60A	0.177433	9.30128	2.37203	0.0348832	1.45738	0.122954	-5.14997
aru	0.177278	6.06386	3.06211	0.00965322	2.01533	0.0503995	-3.96618
CG4203	0.177272	3.78309	3.91223	0.00198781	2.70163	0.016763	-2.07975
Dic1	0.177233	6.49149	2.60917	0.022515	1.64753	0.0907592	-4.80265
NitFhit	0.177207	5.30907	5.04887	0.000267617	3.57249	0.00384867	-0.245845
lcs	0.177123	11.6849	1.45426	0.171015	0.766966	0.353309	-6.52477
CG14749	0.177099	4.26774	3.01891	0.0104677	1.98015	0.0533148	-3.84735
l(2)35Be	0.17708	3.06156	2.25368	0.0432866	1.36365	0.142713	-4.97563
CG2010	0.17699	6.95624	2.92709	0.0124339	1.90539	0.0601413	-4.21241
RFeSP	0.176911	10.5601	3.86496	0.0021676	2.66402	0.0178867	-2.3551
epsilonCOP	0.176767	5.18631	3.80012	0.0024417	2.61231	0.0195356	-2.51855
CG10863	0.176711	7.98777	2.74979	0.0173258	1.76131	0.0748861	-4.5062
CG1358	0.176671	5.03978	3.38326	0.00529054	2.2765	0.0333134	-3.25371
CG16790	0.176509	3.15291	2.06626	0.060625	1.21735	0.176987	-5.28278
CG10639	0.176405	5.44524	3.50297	0.00423221	2.37343	0.0286146	-3.0875
Syx17	0.176252	5.47773	3.45736	0.00460743	2.33654	0.0301717	-3.18459
Ubp64E	0.176033	8.77336	3.17668	0.00778729	2.10861	0.0435588	-3.69399
sni	0.175811	4.46101	3.12149	0.00863599	2.06369	0.0467704	-3.69477
CG5023	0.175737	7.87415	3.56319	0.00378392	2.42206	0.0264307	-2.98563
nero	0.175693	3.85312	2.77334	0.01658	1.78042	0.0727996	-4.2254
Ugt86Dg	0.17566	-0.196684	0.73781	0.474528	0.323738	0.665539	-5.90103
CG12219	0.17565	3.92939	2.65462	0.02069	1.68424	0.0855419	-4.47003
CG16936	0.175626	8.68936	3.61424	0.00344191	2.4632	0.024738	-2.87452
CG1504	0.175065	-0.138412	0.636298	0.536292	0.270599	0.714181	-5.84473
Pex1	0.17506	4.3104	3.32397	0.00591044	2.22838	0.035844	-3.2921
Vps4	0.17504	6.55589	3.89306	0.00205882	2.68638	0.0172165	-2.40417
CG7033	0.174968	6.56192	3.85106	0.00222356	2.65295	0.0181537	-2.48293
CG18005	0.174959	4.40062	3.12343	0.00860465	2.06527	0.0466809	-3.67115
Wbp2	0.174957	8.03798	5.40639	0.000147493	3.83123	0.00252379	0.363716
CG10669	0.174922	3.91548	2.97395	0.0113885	1.94353	0.0566228	-3.86071
CG9987	0.174897	4.79444	3.02157	0.0104156	1.98232	0.0532117	-3.92257
phr	0.174896	5.27172	3.14194	0.0083111	2.08034	0.0455084	-3.72097
PpV	0.174815	5.36155	4.02914	0.00160615	2.79421	0.0143051	-2.10969
l(3)05822	0.174648	6.26755	5.14088	0.000229184	3.63982	0.00348061	-0.131797
CG1688	0.174646	2.62871	1.53328	0.150621	0.822115	0.324107	-5.94496
CG5110	0.174359	5.20993	3.39907	0.00513664	2.28932	0.0326183	-3.27793
CG13204	0.174283	3.57107	2.47813	0.0286992	1.54213	0.107585	-4.72515
foi	0.174263	6.57753	4.73218	0.000460332	3.33693	0.00567913	-0.859147
CG12268	0.174221	3.4962	1.23602	0.239632	0.620456	0.438503	-6.67118
CR43424	0.17421	0.374473	0.794146	0.442225	0.354356	0.638422	-5.81998
spag	0.174201	4.12685	3.69046	0.00298894	2.52448	0.0225253	-2.55617
CG11127	0.174038	4.22584	2.37723	0.034552	1.46153	0.122352	-4.97782
CG4573	0.173912	1.80076	2.36237	0.0355059	1.4497	0.124408	-4.31361
Vps35	0.173871	7.07447	4.89594	0.000347158	3.45947	0.00461938	-0.554473
Sclp	0.173857	5.68722	1.96837	0.0720785	1.14219	0.199967	-5.86817
CG32085	0.173772	4.69939	2.80305	0.0156842	1.80454	0.0701891	-4.2956
CG7920	0.173455	10.896	2.48502	0.0283367	1.54765	0.106521	-4.91163
CG42368	0.173359	4.3866	1.89475	0.0819724	1.08633	0.217281	-5.82753
CG40486	0.173163	0.894162	0.887836	0.39173	0.407013	0.593565	-5.99588
CG2931	0.17315	3.58681	2.7418	0.0175864	1.75482	0.0757176	-4.21034
CG5903	0.173077	8.11119	2.78313	0.0162795	1.78836	0.0720146	-4.44333
CG11802	0.173011	4.07363	3.10846	0.00884953	2.05308	0.0473864	-3.65427
CG31690	0.172994	4.2384	2.18797	0.0487499	1.31203	0.152189	-5.33676
CG13738	0.172968	0.0413287	0.645389	0.53058	0.27525	0.710807	-5.97491
CG9090	0.172749	9.74626	2.38538	0.0340401	1.46801	0.12127	-5.12344
CG12012	0.172713	5.2996	4.05655	0.00152814	2.81584	0.0137574	-2.04929
CG6106	0.172634	3.33923	2.21679	0.0462779	1.33463	0.147975	-5.104
CG31125	0.172629	0.915428	1.17992	0.260441	0.584291	0.462812	-5.74994
CG7430	0.172625	8.89495	3.53089	0.00401798	2.39599	0.0275956	-3.02915
Tango11	0.172606	7.05902	4.66667	0.000515848	3.28748	0.0061514	-0.966528
CG32813	0.172604	6.05097	3.77186	0.0025721	2.58971	0.0202067	-2.62523
CG7371	0.172337	5.68939	4.45898	0.000742828	3.12911	0.00809496	-1.33933
Spt5	0.172287	6.32369	4.42302	0.000791672	3.10145	0.00850664	-1.42145
Cfp1	0.172116	3.62937	2.38677	0.0339532	1.46912	0.121086	-4.88742
dlp	0.17203	4.05699	2.71567	0.0184651	1.73365	0.0782536	-4.32749
Sas	0.171914	0.240526	0.897465	0.386771	0.412546	0.588818	-5.82606
Alr	0.171909	4.13241	3.11003	0.00882364	2.05435	0.0473294	-3.64618
vps2	0.171857	5.61602	3.67568	0.00307175	2.51261	0.0229417	-2.78822
Vps16B	0.171735	3.84568	2.19941	0.0477544	1.32099	0.150682	-5.24799
per	0.171659	4.7015	1.82058	0.0931763	1.03069	0.235605	-5.95764
Vha68-1	0.171612	8.61225	5.32762	0.000167922	3.77489	0.00274365	0.240252
spd-2	0.171546	1.59603	0.960928	0.355174	0.449558	0.560881	-6.21696
CG13578	0.171143	0.822123	1.29786	0.218243	0.66106	0.412815	-5.8822
CG7560	0.170784	4.3676	2.37125	0.0349329	1.45677	0.123047	-5.0185
TMS1	0.17076	7.56919	4.69	0.000495314	3.30512	0.0059996	-0.910237
Prosbeta3	0.170726	6.11343	2.86909	0.0138609	1.85821	0.0647254	-4.32404
membrin	0.1706	3.55102	2.11362	0.0557142	1.25403	0.166992	-5.32748
CG15629	0.170183	3.59159	1.29278	0.219942	0.657691	0.414539	-6.45947
CG33474	0.170002	0.285603	1.01	0.332032	0.478821	0.539558	-5.90829
CR40190	0.170002	2.55731	1.52904	0.15166	0.81913	0.325431	-6.00697
CG4586	0.169903	1.00119	1.18834	0.25723	0.589678	0.458609	-5.7886
CG42553	0.169839	3.67499	2.16514	0.0507962	1.29417	0.156717	-5.24269
CG15093	0.169813	7.0868	1.99246	0.0690874	1.1606	0.194586	-5.85605
vls	0.169718	2.56637	1.9823	0.0703351	1.15283	0.196533	-5.22123
CG12093	0.169631	5.12971	2.96884	0.011498	1.93938	0.0568526	-4.093
Prp31	0.169598	5.10214	3.46987	0.00450131	2.34666	0.0296712	-3.12966
A16	0.16954	4.22426	3.92114	0.0019557	2.7087	0.0165621	-2.15122
CG8678	0.169509	6.01569	4.7281	0.000463595	3.33386	0.00568849	-0.856386
Chc	0.169335	9.08478	4.99489	0.000293255	3.53276	0.00411009	-0.328772
CG12520	0.169289	0.841282	1.21367	0.247757	0.605974	0.447491	-5.87339
mRpL28	0.169277	6.38212	4.28078	0.00102003	2.99139	0.0101223	-1.68312
CG12177	0.169211	5.28232	2.97739	0.0113153	1.94634	0.0564565	-4.07551
CG8301	0.169139	3.50342	1.8779	0.0844036	1.07364	0.221493	-5.6556
CG17187	0.169108	3.03885	2.14563	0.0526084	1.27895	0.160524	-5.11245
CG5199	0.169072	3.0439	3.50083	0.00424914	2.3717	0.0286903	-2.67629
CG30152	0.168967	6.24229	3.39158	0.00520899	2.28325	0.0329661	-3.34859
l(3)neo18	0.168904	9.03915	4.07363	0.00148152	2.82929	0.0134102	-2.00368
CR31044	0.168867	0.885253	1.26258	0.230248	0.637805	0.426877	-5.75355
Gs1l	0.16886	6.44557	2.84964	0.0143749	1.84239	0.0661975	-4.36308
CG2701	0.168631	5.23301	3.05586	0.00976699	2.01024	0.0507021	-3.91918
Adk1	0.168542	8.10152	3.69467	0.00296574	2.52787	0.022435	-2.73593
CG4995	0.168336	0.313857	0.218004	0.831016	0.0803906	0.909642	-6.12228
UbcD10	0.1683	6.37111	4.83646	0.000384461	3.41515	0.00499488	-0.67284
DNApol-delta	0.168252	4.043	3.34173	0.00571743	2.2428	0.0350732	-3.19812
CG14711	0.168111	3.63743	2.79394	0.0159539	1.79713	0.0710145	-4.14622
CG15626	0.168031	5.7453	3.60924	0.00347396	2.45918	0.0248518	-2.91399
Tab2	0.167948	5.951	4.72978	0.000462245	3.33513	0.00568849	-0.855269
blue	0.167884	5.12615	3.43036	0.00484537	2.31467	0.0311983	-3.18973
CG12038	0.16788	3.26738	1.85923	0.0871762	1.0596	0.226097	-5.65499
RabX4	0.167793	3.52019	3.28721	0.00633121	2.19851	0.037531	-3.17621
CG5500	0.167778	6.24547	3.40208	0.00510788	2.29176	0.0325322	-3.3284
pita	0.167632	5.30129	2.86534	0.0139587	1.85515	0.0650605	-4.28297
IntS9	0.167563	3.42221	2.22162	0.0458757	1.33842	0.147667	-5.08028
nemy	0.16756	4.93058	1.03966	0.318587	0.496772	0.527005	-7.0251
CG42633	0.167457	0.0836916	0.983344	0.344464	0.462856	0.550213	-5.87794
CG7946	0.167448	5.49824	4.05091	0.00154388	2.81139	0.0138741	-2.07937
CG4221	0.167251	2.90438	2.62488	0.0218673	1.6602	0.0890035	-4.27431
CG13255	0.167128	4.51991	1.62042	0.130586	0.884105	0.295704	-6.29723
betaCop	0.167105	6.93391	3.33731	0.0057648	2.23922	0.0352772	-3.4428
CG12576	0.167062	7.50624	3.12185	0.00863013	2.06398	0.0467684	-3.83307
CG5013	0.166829	2.53689	2.53559	0.0258074	1.58826	0.0998425	-4.26006
brn	0.166599	2.66896	2.14751	0.0524308	1.28041	0.16022	-5.01406
CG4080	0.166541	5.65899	4.2407	0.00109599	2.96019	0.0107165	-1.73376
Chi	0.16633	4.86535	2.55592	0.0248535	1.60461	0.0973238	-4.79247
CG12269	0.166293	3.79976	2.35039	0.0362933	1.44017	0.126413	-4.93948
Bj1	0.166035	5.10398	5.12156	0.000236744	3.62572	0.00352575	-0.102832
CG9018	0.165848	4.86513	3.61905	0.00341131	2.46708	0.0246197	-2.81856
Tpr2	0.165842	8.21676	4.96448	0.000308819	3.5103	0.00424488	-0.405254
Zasp52	0.165308	11.5874	3.86798	0.00215563	2.66643	0.0178469	-2.32542
CG5862	0.165231	5.17827	3.44441	0.00472005	2.32605	0.0306222	-3.17628
CG14299	0.165219	6.76973	3.64591	0.00324573	2.48869	0.0237963	-2.86858
CG10053	0.165215	2.38601	2.09478	0.0576214	1.23942	0.171016	-4.96916
CG11739	0.165048	6.87135	3.22036	0.00717529	2.14416	0.0411375	-3.66437
Prp18	0.165039	3.24331	2.85657	0.0141898	1.84802	0.0656173	-3.90996
Osbp	0.164896	7.09341	4.93205	0.000326376	3.48628	0.00441336	-0.49055
Rab8	0.164737	7.66502	3.02875	0.0102763	1.98816	0.0526621	-4.00205
Rpn12	0.16455	5.90266	3.75153	0.00267029	2.57344	0.0207465	-2.66031
Cad99C	0.164509	4.92572	2.49486	0.0278264	1.55554	0.105176	-4.92278
CG16787	0.164373	5.08167	4.01068	0.00166099	2.77963	0.0146499	-2.1059
CR43699	0.164292	1.94338	0.852877	0.410095	0.387115	0.609925	-6.44542
CG33056	0.164214	6.93129	2.591	0.023288	1.63287	0.0930124	-4.82477
pbl	0.164205	5.44849	2.98664	0.0111207	1.95387	0.0558003	-4.0734
CG6812	0.164141	5.13055	4.32298	0.000945907	3.02415	0.00967497	-1.52681
CG30344	0.164136	5.68217	3.76194	0.00261953	2.58178	0.0204988	-2.63325
CG16743	0.164099	4.80634	1.89431	0.0820348	1.086	0.217389	-5.8992
CG4098	0.164071	2.65149	1.99083	0.0692866	1.15935	0.194817	-5.26556
glob1	0.163828	7.93225	3.29205	0.00627404	2.20245	0.0374084	-3.50204
CG10492	0.163795	5.36807	1.92557	0.0776874	1.10965	0.210787	-5.92432
Aats-leu	0.163719	4.83203	3.56934	0.0037409	2.42702	0.0261784	-2.90071
Prosbeta1	0.163454	6.3442	2.48761	0.0282018	1.54972	0.106267	-5.0213
CG8272	0.163323	4.66496	3.18496	0.00766735	2.11535	0.0431175	-3.59031
CG8519	0.163303	5.73543	2.6485	0.0209269	1.67929	0.0862007	-4.71813
CG30005	0.1632	4.15978	3.32625	0.00588532	2.23023	0.0357955	-3.27658
ppk25	0.163157	1.5843	1.73576	0.107671	0.967901	0.259893	-5.45236
CG13902	0.163144	3.44339	1.87336	0.0850704	1.07022	0.222658	-5.67298
l(2)k14505	0.162858	5.18219	4.05851	0.00152273	2.81738	0.0137211	-2.03422
Rab10	0.162855	7.45477	4.68337	0.00050106	3.30011	0.00605452	-0.923484
CG12772	0.162825	5.43693	3.07146	0.0094854	2.02294	0.04982	-3.90774
Hmt-1	0.16269	6.64899	3.534	0.00399484	2.3985	0.0274745	-3.07965
CG10424	0.162653	4.32333	2.53398	0.0258845	1.58696	0.0999755	-4.74436
CG13630	0.16248	5.25551	3.61028	0.00346723	2.46002	0.0248518	-2.87604
CG14130	0.162421	4.8129	3.46167	0.00457057	2.34003	0.0299893	-3.12125
CG31102	0.162384	4.91732	2.29039	0.0404924	1.39263	0.136014	-5.22683
poly	0.162382	6.23751	3.2002	0.00745152	2.12775	0.0421887	-3.70864
CG14450	0.162353	3.98236	2.44014	0.0307811	1.51172	0.112796	-4.85953
l(2)not	0.162337	4.11158	2.61192	0.0224003	1.64975	0.0905466	-4.54913
CG43707	0.162253	5.97109	2.53981	0.0256064	1.59165	0.0992956	-4.90858
CG17734	0.162198	7.3369	3.92379	0.00194625	2.7108	0.0165101	-2.33181
egl	0.162129	7.11432	4.3975	0.000828349	3.08179	0.00879385	-1.45463
nrv2	0.162071	8.28772	4.17864	0.00122541	2.91172	0.011707	-1.83034
IP3K2	0.162068	5.88106	2.13584	0.0535406	1.27132	0.162623	-5.62828
AnnX	0.162043	6.97069	2.37438	0.0347332	1.45926	0.122713	-5.20726
CG4980	0.16203	3.20944	2.22475	0.0456166	1.34088	0.147332	-5.04998
Mcm6	0.161848	2.94536	1.97619	0.0710955	1.14816	0.197844	-5.33771
CG17350	0.161746	3.38828	3.66411	0.00313822	2.50332	0.0232816	-2.60701
CG8281	0.161735	4.33682	2.96601	0.0115593	1.93707	0.0570971	-3.96958
CG6540	0.161611	1.69895	1.67806	0.118648	0.925741	0.277214	-5.38311
CG3437	0.161471	2.70985	1.61282	0.132236	0.87865	0.298023	-5.83739
alpha-Est4aPsi	0.161271	0.0979023	0.223937	0.826498	0.0827583	0.907404	-6.01757
CG9855	0.16126	6.03065	3.61855	0.00341448	2.46668	0.0246197	-2.91668
CG5508	0.161233	7.44957	1.74234	0.106478	0.972739	0.257579	-6.23517
CG10721	0.161135	4.08611	2.90164	0.0130412	1.88468	0.0619984	-4.02939
CG12333	0.161109	4.91189	2.98256	0.0112059	1.95055	0.0561872	-4.02436
CG4945	0.161103	7.28731	3.35215	0.00560713	2.25126	0.0346091	-3.40192
kay	0.161088	9.53772	3.56102	0.0037992	2.42031	0.0264307	-2.95109
CG32425	0.161027	7.42372	2.00554	0.0675122	1.17062	0.191662	-5.81914
CG13367	0.161007	4.56511	2.792	0.0160116	1.79556	0.0712397	-4.3229
CG11617	0.160951	6.0513	2.24286	0.0441443	1.35512	0.144461	-5.43923
CG1434	0.160851	2.75076	1.57792	0.140049	0.853721	0.310312	-5.90133
CG7239	0.160805	3.89371	2.30922	0.039127	1.40752	0.132721	-5.07175
mRpL3	0.160719	5.5653	3.57185	0.00372354	2.42904	0.0261298	-2.98006
Taf8	0.160655	2.51947	1.88399	0.0835173	1.07822	0.220095	-5.38419
Rph	0.160648	2.84787	2.46372	0.0294725	1.53058	0.109568	-4.50599
CG3731	0.16054	10.34	2.58446	0.0235722	1.6276	0.093661	-4.74954
cry	0.160524	7.86813	3.40786	0.00505305	2.29645	0.0322859	-3.28412
vps24	0.160431	6.55816	3.04524	0.00996347	2.00159	0.0515347	-3.99802
SPR	0.160333	6.07882	2.7697	0.0166933	1.77746	0.0731387	-4.50213
rk	0.160256	2.44912	1.59142	0.13698	0.863344	0.305476	-5.7205
cbx	0.160235	5.08943	3.20865	0.00733444	2.13463	0.0417149	-3.62466
CG31427	0.160106	2.25151	1.34019	0.204515	0.689275	0.396049	-6.13786
fu	0.160085	3.7421	2.02462	0.0652739	1.18526	0.187115	-5.49363
CG32732	0.160051	5.78193	3.03938	0.0100735	1.99682	0.0519961	-3.99947
GS	0.160043	6.23659	2.63703	0.0213784	1.67002	0.0875193	-4.75007
nmd	0.160006	6.11267	3.68842	0.00300025	2.52284	0.0225935	-2.78779
CG3719	0.159939	6.95753	3.44735	0.00469424	2.32843	0.0305401	-3.2332
SNF4Agamma	0.159801	8.85543	3.43465	0.00480674	2.31815	0.0310295	-3.21
CG15084	0.159747	2.55275	2.11475	0.0556021	1.25491	0.166706	-5.00579
CG5835	0.159691	5.58254	2.37339	0.0347964	1.45847	0.122758	-5.22274
Hsp60	0.159549	8.09093	2.89259	0.0132642	1.87732	0.0627304	-4.24323
Cpr49Ab	0.159449	-1.44859	0.0688885	0.94619	0.0240215	0.972065	-5.31792
CG9399	0.159364	8.12863	4.07782	0.00147031	2.83259	0.0133329	-2.02165
CG1635	0.159362	5.20676	4.07124	0.00148798	2.8274	0.0134564	-2.0089
CG11030	0.159018	5.08157	2.60077	0.0228691	1.64075	0.0919272	-4.74064
CG5001	0.158983	6.40943	2.7889	0.0161049	1.79304	0.0714321	-4.47437
CG15073	0.158981	3.362	3.01745	0.0104964	1.97896	0.0534338	-3.66353
meso18E	0.158956	5.46436	3.59002	0.00360006	2.44369	0.025488	-2.93096
CG7770	0.158936	4.64965	2.85467	0.0142403	1.84648	0.0657291	-4.20951
CG3295	0.158926	5.6553	3.09525	0.00907155	2.04232	0.0483219	-3.87231
CG5516	0.158895	3.90547	2.00518	0.0675548	1.17034	0.191691	-5.58716
Nf-YA	0.158702	3.40007	2.8838	0.0134843	1.87017	0.0635229	-3.88061
CG4020	0.158633	2.54134	0.530232	0.60543	0.217936	0.764512	-6.64115
CG5037	0.158603	7.61203	3.9638	0.00180912	2.74253	0.0155605	-2.24439
CG17168	0.158513	4.8408	4.15406	0.00128094	2.89247	0.0120987	-1.82141
CG11050	0.158472	7.96088	4.04333	0.00156528	2.80541	0.0140285	-2.08698
CG7146	0.158395	4.35149	3.38504	0.00527302	2.27794	0.033224	-3.18401
dgt1	0.158363	4.33423	3.15222	0.00815262	2.0887	0.0449609	-3.62196
CG4287	0.158305	6.54383	3.86724	0.00215853	2.66584	0.0178536	-2.45176
CG4169	0.158187	10.2268	1.98881	0.0695341	1.1578	0.195239	-5.77761
opa1-like	0.158173	7.78086	4.23182	0.00111361	2.95327	0.0108252	-1.74076
Uhg5	0.157997	4.80752	3.03184	0.010217	1.99068	0.0524388	-3.91518
CG3192	0.157932	7.83478	2.77689	0.0164705	1.78329	0.0725704	-4.46326
CG33498	0.157923	1.14514	1.69129	0.116046	0.93537	0.272906	-5.21461
CG3788	0.157842	0.00566003	0.190968	0.85168	0.0697237	0.92275	-6.06458
CG5608	0.157768	4.23109	3.4283	0.00486397	2.31301	0.0312777	-3.0797
CG9331	0.157623	7.45871	1.55652	0.145035	0.838527	0.316379	-6.51623
en	0.15761	1.24449	1.17625	0.261848	0.581951	0.464521	-5.90613
Rim	0.157398	6.4867	1.17267	0.263232	0.579662	0.4659	-7.02008
gatA	0.157126	4.10382	2.41707	0.0321158	1.49328	0.116334	-4.91255
CG32105	0.157123	1.12227	0.853986	0.409504	0.387742	0.609346	-6.08029
7B2	0.157059	6.00454	2.35325	0.0361037	1.44245	0.125972	-5.25103
Argk	0.156966	11.4472	2.40746	0.032688	1.48561	0.117788	-5.0336
CG1550	0.156955	5.10872	2.77903	0.0164047	1.78503	0.0723864	-4.41607
Tsp42En	0.156923	2.05157	1.07212	0.304337	0.516646	0.511854	-6.30543
exo84	0.156877	5.62537	3.64552	0.00324808	2.48837	0.0237963	-2.84827
CG8314	0.156864	5.15024	2.8299	0.0149161	1.82635	0.0678454	-4.33091
SerT	0.156698	3.50373	2.85944	0.0141137	1.85036	0.0654164	-4.05087
Snx3	0.156561	6.49943	4.46724	0.000732051	3.13546	0.00803006	-1.3401
CG4452	0.156521	6.45429	2.93255	0.0123073	1.90984	0.0597118	-4.20939
HDAC6	0.156428	7.82543	1.78019	0.0998452	1.00067	0.246785	-6.17128
crn	0.156403	4.99948	3.39013	0.00522312	2.28207	0.0329928	-3.26782
mei-W68	0.156344	0.628625	1.1419	0.275326	0.560153	0.480023	-5.68334
ATPsyn-beta	0.156211	12.138	3.22397	0.00712689	2.1471	0.040907	-3.52551
CG6094	0.156115	4.64439	2.47972	0.0286151	1.5434	0.107339	-4.908
CG31320	0.155963	2.53177	0.728482	0.480015	0.318745	0.670602	-6.76005
HP1c	0.155939	3.68453	2.59315	0.023195	1.6346	0.0928372	-4.52429
CG7806	0.155878	5.91268	3.00182	0.0108087	1.96623	0.054551	-4.06817
CSN1b	0.155875	5.48086	4.12543	0.00134891	2.87002	0.0126333	-1.93931
CG42284	0.155854	1.29177	1.63022	0.128485	0.891148	0.292671	-5.55117
Mlc1	0.155845	10.1777	3.61928	0.00340985	2.46726	0.0246197	-2.825
CG1231	0.155685	0.671068	0.737286	0.474836	0.323457	0.665596	-6.08429
CG13793	0.155625	3.73554	1.69866	0.114619	0.940743	0.270649	-6.05877
SIDL	0.155457	5.34743	4.48527	0.000709098	3.14929	0.00783852	-1.25697
CG8680	0.155337	7.79789	2.93379	0.0122789	1.91084	0.0596223	-4.1729
fs(1)Yb	0.155335	-0.308476	0.675548	0.51188	0.290832	0.697224	-5.88119
CG31626	0.155279	0.133902	0.75574	0.464091	0.333397	0.656986	-5.92494
Muc68Ca	0.155137	1.97046	1.28505	0.222543	0.652586	0.417943	-6.02136
dgt6	0.154914	2.14662	1.65977	0.122326	0.912481	0.283621	-5.6464
eIF2B-delta	0.15481	5.06884	3.15052	0.00817863	2.08732	0.0450707	-3.71721
CG14184	0.154743	5.19768	3.33425	0.00579789	2.23673	0.035393	-3.3965
CG1908	0.154683	5.68774	2.86948	0.0138508	1.85853	0.0647081	-4.30094
Desi	0.154678	2.29191	1.46615	0.167805	0.775195	0.34851	-5.87472
CG12926	0.154665	4.53857	3.08606	0.00922928	2.03483	0.0489942	-3.79422
CG2889	0.154646	4.35555	1.90421	0.0806342	1.09348	0.215465	-5.83089
CG32052	0.154543	3.09395	1.68013	0.118236	0.927251	0.276446	-5.83817
l(2)35Bg	0.154474	5.1627	4.4278	0.000784985	3.10514	0.00845297	-1.34247
CG11982	0.154426	5.99654	4.44848	0.000756757	3.12104	0.00822254	-1.3697
Spn42De	0.154198	1.12053	1.03235	0.321862	0.49233	0.530142	-5.84229
Cyp4d20	0.154003	6.30751	1.89083	0.0825321	1.08338	0.217974	-6.02865
dre4	0.153886	5.77854	3.94164	0.00188377	2.72497	0.0160402	-2.29188
Stam	0.153867	6.49786	3.64612	0.00324449	2.48885	0.0237963	-2.86874
l(2)34Fd	0.153573	3.63303	1.99562	0.0687045	1.16301	0.194054	-5.52721
Cul-2	0.153461	7.62448	2.90648	0.0129235	1.88862	0.0616147	-4.23161
RpII33	0.153418	3.39203	1.97007	0.0718633	1.14349	0.199536	-5.4981
CG4951	0.153236	3.25425	3.10845	0.00884978	2.05307	0.0473864	-3.48916
CG1732	0.153171	6.47773	1.89522	0.0819047	1.08669	0.217159	-6.02174
CG9335	0.153137	4.77662	3.12125	0.00863987	2.06349	0.0467704	-3.75607
CG5548	0.152946	6.4161	2.77978	0.0163816	1.78564	0.0723702	-4.49141
CG4325	0.152928	2.71017	1.48942	0.161669	0.791374	0.339974	-5.99626
Pep	0.152914	7.97596	3.48039	0.00441392	2.35518	0.0293282	-3.14277
CG8303	0.152851	3.78125	1.82855	0.0919094	1.03664	0.233346	-5.82436
KrT95D	0.152836	9.07574	3.64668	0.00324109	2.48931	0.0237963	-2.80488
CG9281	0.152824	7.60538	4.51776	0.000669614	3.17418	0.00751849	-1.21862
CG14194	0.152819	5.37577	4.46833	0.000730647	3.13629	0.00803006	-1.30079
mRpL52	0.152664	4.19811	2.99096	0.011031	1.95739	0.0554211	-3.86018
TER94	0.152608	8.38251	3.2701	0.00653717	2.18461	0.0384045	-3.5319
CG8964	0.152521	1.81841	1.42801	0.178288	0.748878	0.362267	-5.71831
CG6184	0.152251	4.3597	1.86601	0.0861595	1.0647	0.224233	-5.86945
Pino	0.152244	8.82052	2.51039	0.0270389	1.56801	0.103248	-4.91721
Rab7	0.152226	8.22515	3.54707	0.00389898	2.40905	0.0269637	-3.01206
cm	0.152128	3.65789	2.7435	0.0175306	1.7562	0.0756033	-4.24201
ap	0.152074	6.30165	4.28808	0.00100678	2.99706	0.0100107	-1.66973
CG5276	0.151979	4.52998	2.21076	0.046785	1.32989	0.149082	-5.33777
CG33230	0.151899	3.90361	2.38115	0.0343049	1.46464	0.121804	-4.92088
Tina-1	0.151811	4.6225	1.45385	0.171127	0.766682	0.353328	-6.5048
Gtp-bp	0.151773	6.37539	2.762	0.0169351	1.77121	0.073836	-4.52431
CG14777	0.151504	5.46448	3.13776	0.00837652	2.07694	0.0457663	-3.78565
Pal2	0.151502	6.10489	2.6247	0.0218746	1.66006	0.0890035	-4.7678
RpS20	0.151406	8.87178	2.68538	0.0195378	1.70912	0.0817938	-4.60169
CG7265	0.151352	4.29806	2.53103	0.0260261	1.58459	0.1003	-4.73881
dpr5	0.151164	2.50039	1.44693	0.173019	0.761906	0.355391	-6.02683
CG4686	0.150996	4.57305	2.13853	0.0532829	1.27341	0.162136	-5.47256
Cyp313b1	0.150992	1.52986	1.40954	0.183557	0.73623	0.368705	-5.78941
Smg6	0.150924	7.26009	3.86886	0.00215216	2.66712	0.017833	-2.43449
CG3309	0.15092	3.83189	2.35534	0.0359656	1.44411	0.125666	-4.93011
nrv1	0.150867	9.66885	4.00217	0.00168691	2.77291	0.0148037	-2.11926
CR43910	0.150758	0.481677	0.705808	0.493514	0.306701	0.681077	-5.938
nimB3	0.150718	1.9781	0.962903	0.354222	0.450725	0.559642	-6.32337
CG8931	0.150573	6.00573	3.25345	0.00674413	2.17107	0.0392739	-3.60153
CG13999	0.150499	1.68146	1.26344	0.22995	0.638367	0.426562	-5.94791
CG32230	0.150498	10.121	2.10869	0.0562075	1.25021	0.168017	-5.58745
AQP	0.150492	7.43333	2.88944	0.0133427	1.87476	0.0630119	-4.27015
Sap130	0.150477	6.01097	2.98203	0.0112172	1.95012	0.0562154	-4.11074
por	0.150404	2.86638	1.68381	0.117511	0.929922	0.275138	-5.7944
PGRP-SA	0.150157	4.00796	1.63966	0.126489	0.897947	0.289964	-6.15751
CG14613	0.149916	5.29108	3.19193	0.00756789	2.12103	0.042715	-3.65993
CG7379	0.149738	5.56395	4.46753	0.000731677	3.13568	0.00803006	-1.30922
Uba2	0.149713	5.63855	3.38746	0.00524925	2.2799	0.0331369	-3.33324
CG3735	0.149627	3.88069	3.03681	0.0101222	1.99472	0.0521471	-3.71897
CG8568	0.149435	0.157499	0.627778	0.541677	0.26626	0.719046	-6.00402
mthl2	0.149404	3.05505	0.937425	0.366657	0.43574	0.570539	-6.73574
CG32365	0.149404	1.45589	1.37439	0.193944	0.712323	0.381934	-5.76098
CG7322	0.149327	6.17962	1.55978	0.144264	0.840842	0.315387	-6.51957
CG8147	0.149284	7.48574	0.90516	0.38284	0.416983	0.585375	-7.2763
Cyt-b5-r	0.149143	9.98099	1.70631	0.113155	0.946324	0.268271	-6.22045
nord	0.149124	3.8828	1.41752	0.181265	0.741687	0.365701	-6.42357
CG3214	0.148811	9.14508	3.07348	0.00944942	2.02459	0.0497514	-3.88144
bonsai	0.148708	5.12786	2.56029	0.0246533	1.60813	0.0968232	-4.81582
CG3508	0.148203	4.36191	1.96938	0.0719508	1.14296	0.199668	-5.72961
MTF-1	0.148147	5.69756	3.16073	0.00802352	2.09564	0.0444698	-3.75575
CG2765	0.148122	8.38512	1.13051	0.279911	0.552979	0.485449	-7.02391
DmsR-2	0.14808	2.20947	0.865954	0.403159	0.394524	0.604547	-6.45169
CG7218	0.148034	5.13647	3.06242	0.00964747	2.01559	0.0503995	-3.88611
CG14230	0.147996	3.63344	2.18364	0.0491318	1.30864	0.152993	-5.2311
CG3605	0.147891	5.46091	4.31256	0.000963669	3.01607	0.00977659	-1.58604
dj-1beta	0.147887	7.1172	2.43096	0.0313053	1.50438	0.114173	-5.10816
Neu3	0.147778	5.80654	2.4717	0.029042	1.53697	0.108533	-5.03581
CG6841	0.147726	4.68491	2.94659	0.0119877	1.92126	0.0587798	-4.05551
ade5	0.147567	8.74035	1.41001	0.183423	0.736547	0.368653	-6.67117
HDAC4	0.147552	7.15349	4.1632	0.00125999	2.89963	0.0119801	-1.88986
Act57B	0.147489	9.9222	1.51185	0.155935	0.807056	0.331686	-6.50721
CG1907	0.147361	6.40333	2.23638	0.0446655	1.35003	0.145483	-5.46079
CG11699	0.147284	5.62765	3.04348	0.00999636	2.00016	0.0516513	-3.97938
H15	0.147246	1.68217	0.977992	0.347	0.459671	0.552073	-6.3618
Scox	0.147188	5.62264	2.91424	0.0127369	1.89494	0.061096	-4.22437
Klp54D	0.147121	0.990338	0.957651	0.35676	0.447624	0.56211	-6.27498
verm	0.147059	3.64464	2.50059	0.0275334	1.56014	0.104378	-4.70547
CG13850	0.146924	5.80494	3.67954	0.00304992	2.51571	0.0228298	-2.79129
TfIIB	0.146511	5.36705	3.1616	0.00801052	2.09634	0.0444518	-3.73398
CG34422	0.146491	6.16879	3.23029	0.007043	2.15224	0.0406355	-3.64887
y	0.146385	-3.20313	0.145821	0.886435	0.052353	0.942088	-5.21516
Patsas	0.146347	2.92515	1.43966	0.175029	0.756891	0.358488	-6.1505
mtm	0.146299	5.01813	3.21804	0.00720647	2.14228	0.0412217	-3.58509
CG14721	0.146272	4.75926	2.30188	0.0396542	1.40171	0.133828	-5.2215
CR30055	0.146211	5.20251	2.87457	0.0137195	1.86266	0.0642149	-4.25692
Rab14	0.146099	6.99387	4.25832	0.00106189	2.97392	0.0104547	-1.71294
lost	0.145969	9.00576	4.9561	0.000313259	3.5041	0.00428235	-0.396273
CG8547	0.145921	9.0521	2.12764	0.0543335	1.26493	0.164134	-5.57753
CG10641	0.145797	6.11398	3.06704	0.00956439	2.01934	0.0500966	-3.95768
TpnC25D	0.145725	5.67555	2.87913	0.0136027	1.86637	0.0638117	-4.28823
rho	0.145675	5.45553	2.43796	0.030905	1.50997	0.113126	-5.06797
Obp57e	0.145668	-0.216535	1.15221	0.271227	0.566668	0.47567	-6.05151
CG17029	0.145571	4.87156	0.87717	0.397273	0.400911	0.59896	-7.19158
GNBP1	0.145513	4.44703	2.90681	0.0129155	1.88889	0.0616061	-4.09434
CG3534	0.145463	5.63312	1.79402	0.0975147	1.01093	0.242937	-6.14245
CG31648	0.14541	4.27055	2.42598	0.0315939	1.5004	0.114848	-4.94063
Rab21	0.145303	4.82709	2.52223	0.0264533	1.57752	0.101594	-4.85615
Cul-4	0.145273	6.27436	3.37037	0.00541943	2.26605	0.0338689	-3.38791
CG11523	0.145227	3.71708	2.37341	0.0347948	1.45849	0.122758	-4.91236
CG16903	0.145086	5.04945	2.59373	0.0231702	1.63507	0.0928372	-4.75029
Tre1	0.14506	3.89971	1.85615	0.0876399	1.0573	0.226668	-5.85801
CG32582	0.145059	2.32902	2.26347	0.0425239	1.37137	0.140849	-4.74365
CG32815	0.145039	4.41212	1.97818	0.0708463	1.14968	0.19748	-5.72293
CG30022	0.144975	5.86147	2.75488	0.0171619	1.76543	0.0744326	-4.52544
CG10189	0.144958	3.91689	2.72473	0.0181555	1.74099	0.0773349	-4.31844
CG18476	0.144891	4.39058	2.30664	0.0393118	1.40548	0.133084	-5.17585
CG32121	0.144866	6.40269	2.7574	0.0170813	1.76748	0.0741821	-4.53237
CG6903	0.144712	6.21848	2.78817	0.016127	1.79245	0.0714664	-4.47419
Sln	0.144693	3.62439	1.79121	0.097984	1.00884	0.243813	-5.83727
CDC45L	0.144651	3.53833	1.80811	0.0951915	1.0214	0.238767	-5.82219
Syx16	0.144647	4.20691	2.37768	0.034524	1.46188	0.122296	-5.01339
trsn	0.144394	3.82275	2.70385	0.0188768	1.72407	0.0795597	-4.3586
CG31126	0.144337	5.00489	2.42436	0.0316883	1.4991	0.115108	-5.04932
Miro	0.144316	6.93178	3.81702	0.00236702	2.6258	0.0190755	-2.54295
dbe	0.144268	3.7943	2.89362	0.0132386	1.87816	0.0626984	-3.99542
CG14221	0.143881	0.415648	0.885793	0.392788	0.405842	0.594716	-6.00755
CG34134	0.143864	4.18845	2.20321	0.0474279	1.32397	0.150194	-5.28343
CG3409	0.143801	8.06346	3.66889	0.00311055	2.50716	0.0231278	-2.78878
Ho	0.143723	6.15069	3.45584	0.00462052	2.33531	0.0302377	-3.22403
CG8401	0.143635	1.3623	1.28458	0.222702	0.652275	0.418163	-5.64182
CG5126	0.143527	4.34767	1.6279	0.12898	0.889477	0.293534	-6.23422
Galt	0.143519	6.58347	1.44138	0.174552	0.758075	0.357805	-6.68561
CG11898	0.143347	1.58797	0.594521	0.562984	0.249504	0.735028	-6.41984
pen	0.143291	4.92168	2.63117	0.021613	1.66529	0.0883348	-4.66946
Scsalpha	0.143253	8.85831	3.30441	0.00613065	2.21249	0.0367508	-3.45351
CG4623	0.143144	1.76025	0.788858	0.445196	0.351449	0.641206	-6.39351
Atg6	0.143141	4.89897	3.45494	0.00462828	2.33458	0.0302488	-3.1303
CG7834	0.143095	7.83299	2.25715	0.0430148	1.36638	0.142145	-5.39129
CG6454	0.143069	7.61266	3.60292	0.0035149	2.45409	0.0250352	-2.9233
CG1637	0.143017	7.78153	2.57279	0.0240882	1.6182	0.095106	-4.83536
sec71	0.142966	6.78089	3.8596	0.00218902	2.65975	0.0179802	-2.46568
CG1814	0.142911	7.70521	4.05854	0.00152265	2.8174	0.0137211	-2.06919
Elongin-B	0.14272	6.40946	2.65348	0.020734	1.68332	0.0855822	-4.72255
CG11293	0.142614	2.32121	1.4193	0.180757	0.742905	0.365279	-5.97746
CG18249	0.142594	4.69651	1.90371	0.0807051	1.0931	0.215465	-5.84427
Sdc	0.142585	8.23093	2.43004	0.0313585	1.50365	0.114325	-5.08061
Sin	0.142474	3.92819	2.71728	0.0184099	1.73495	0.0781188	-4.35565
CG8170	0.142354	0.81297	0.601137	0.55871	0.252814	0.73155	-6.11289
CG3246	0.142279	6.91942	1.81816	0.0935644	1.02889	0.236108	-6.14139
Tsc1	0.142275	5.96073	3.27198	0.00651425	2.18614	0.0382923	-3.56384
spi	0.142145	6.20966	3.70517	0.00290878	2.53629	0.0220877	-2.75685
CG32302	0.142133	-1.60087	0.118968	0.907229	0.0422829	0.952468	-5.44034
ird1	0.141938	5.54477	2.99153	0.0110191	1.95785	0.0553893	-4.0588
CG2116	0.141891	4.36647	2.9084	0.0128771	1.89018	0.0615401	-4.07337
CG4045	0.141751	3.54273	2.2115	0.0467222	1.33048	0.14893	-5.14845
danr	0.141718	1.75116	1.30377	0.216284	0.664975	0.410612	-5.8953
CG6404	0.141684	4.55978	2.03935	0.0635935	1.19659	0.183508	-5.63137
Pros54	0.141642	6.32925	2.75516	0.0171528	1.76567	0.074428	-4.53641
Ubqn	0.141616	7.62776	2.68409	0.019585	1.70808	0.0819568	-4.63894
CG7470	0.14151	9.68414	1.49769	0.159535	0.797145	0.337085	-6.53414
Lnk	0.141503	6.16178	4.11719	0.00136915	2.86355	0.0127156	-1.98331
CG31664	0.141485	5.06377	1.89924	0.0813351	1.08972	0.216396	-5.94204
CG7993	0.141466	3.94549	2.71137	0.0186137	1.73017	0.0786848	-4.37461
CG3925	0.141448	5.43015	3.56824	0.0037486	2.42613	0.026214	-2.96945
CG8273	0.141436	4.38119	3.71837	0.00283871	2.54688	0.0216875	-2.55355
CG4069	0.141413	3.16324	1.86675	0.0860498	1.06525	0.224145	-5.59277
Tor	0.141386	6.53951	3.52872	0.00403424	2.39424	0.0276503	-3.09019
CG7358	0.141378	5.87501	2.82461	0.0150643	1.82205	0.0681055	-4.39713
Kap-alpha3	0.14134	8.28394	5.01561	0.000283119	3.54803	0.00400154	-0.311678
CG6196	0.141281	2.57807	2.53281	0.0259406	1.58602	0.100095	-4.31296
NP15.6	0.141259	7.74143	2.20402	0.0473578	1.32461	0.150094	-5.48587
CG9117	0.14122	1.04387	0.858514	0.407095	0.390304	0.60764	-6.07142
CG5087	0.141173	6.40305	2.83452	0.0147876	1.8301	0.0675207	-4.39093
mRpL21	0.141052	4.32542	2.93247	0.0123093	1.90977	0.0597118	-4.0279
p24-1	0.141008	6.20015	3.15562	0.00810071	2.09148	0.0447487	-3.79221
Lig4	0.140889	3.66072	2.08353	0.0587892	1.2307	0.1734	-5.37536
CG14662	0.140654	2.07107	0.912183	0.379276	0.421045	0.58175	-6.3657
CG6689	0.1406	5.88622	2.97256	0.011418	1.94241	0.0566465	-4.12529
CG13248	0.140554	4.48122	2.58625	0.0234939	1.62904	0.0934613	-4.6507
CG3335	0.140476	4.5974	2.06021	0.0612808	1.21268	0.178484	-5.60227
CG12158	0.140355	3.66181	1.07808	0.301771	0.520322	0.50952	-7.11804
Nup107	0.140323	4.68102	1.90989	0.0798409	1.09777	0.214059	-5.85873
Cyp12a5	0.140317	6.50194	2.29216	0.0403621	1.39403	0.135759	-5.3647
Ahcy13	0.140306	6.68445	2.20484	0.0472882	1.32525	0.149921	-5.5131
CG9839	0.140298	3.61133	1.7539	0.104411	0.981252	0.254422	-5.90911
Mef2	0.140208	8.04463	3.3426	0.00570808	2.24351	0.0350589	-3.40205
CG11723	0.140202	4.24301	2.66093	0.0204484	1.68934	0.0849297	-4.50365
Irk2	0.140199	6.29001	2.42824	0.0314624	1.50221	0.11462	-5.12091
CG8795	0.140186	1.28865	1.06625	0.306878	0.513034	0.514018	-6.14292
CG17141	0.14015	3.98463	2.13963	0.0531779	1.27427	0.161916	-5.36615
niki	0.140114	0.813107	0.870206	0.400921	0.396942	0.602376	-6.2053
CG14757	0.140026	9.18632	3.47913	0.00442428	2.35416	0.0293571	-3.1188
CG11668	0.139938	2.96316	1.71555	0.111407	0.953087	0.265449	-5.77539
Glut4EF	0.139868	8.01377	1.82667	0.0922068	1.03524	0.233809	-6.0937
CG42686	0.139657	1.07834	1.01855	0.328115	0.483973	0.535936	-5.9159
lox2	0.139632	3.14035	1.96516	0.0724865	1.13974	0.200764	-5.64793
CG5009	0.13958	7.24049	2.55562	0.0248676	1.60437	0.0973238	-4.8749
CG8026	0.139574	7.59185	2.72141	0.0182683	1.7383	0.0776169	-4.56774
NUCB1	0.139245	7.45838	3.00732	0.0106977	1.97071	0.05421	-4.04471
Ack	0.139219	6.27372	2.64986	0.0208744	1.68039	0.0860196	-4.7286
CG17271	0.13919	6.29725	3.39828	0.00514425	2.28868	0.0326391	-3.33591
Sgt	0.139135	5.83776	2.3632	0.0354519	1.45036	0.124349	-5.22877
DMAP1	0.139094	4.262	2.73222	0.0179035	1.74706	0.0765991	-4.39257
Mpk2	0.139076	5.13202	2.76914	0.0167107	1.77701	0.0731387	-4.4461
CG17260	0.139035	3.76171	1.83373	0.0910946	1.04051	0.232162	-5.82228
CG16926	0.138945	7.755	1.86144	0.0868437	1.06126	0.22541	-6.04335
Hsp70Bc	0.138889	1.41671	0.641637	0.532933	0.273328	0.712554	-6.31537
CG14787	0.138766	0.11956	0.817513	0.429251	0.367289	0.627396	-5.86823
CG7747	0.138734	3.97561	2.19157	0.048434	1.31485	0.151639	-5.29574
Madm	0.138654	5.29838	1.91125	0.0796523	1.0988	0.213797	-5.94317
CG13606	0.138614	1.81596	1.51334	0.155561	0.8081	0.331172	-5.83924
CG10222	0.138596	2.67177	1.51994	0.15391	0.812733	0.329348	-5.98321
P5cr	0.138588	4.911	2.20489	0.0472841	1.32529	0.149921	-5.39115
Dek	0.138486	7.40998	2.72673	0.0180878	1.74261	0.0771782	-4.56709
CG15514	0.138447	4.83584	2.23217	0.0450075	1.34671	0.146121	-5.36647
CG3104	0.138309	3.83946	1.50213	0.158399	0.800248	0.335712	-6.36511
Vha100-1	0.138237	7.51849	3.17082	0.00787324	2.10385	0.0438558	-3.73939
Past1	0.138125	6.83983	3.33202	0.00582212	2.23492	0.0355192	-3.45528
Vps26	0.138054	6.03368	3.4387	0.00477057	2.32143	0.0308758	-3.25292
CG10671	0.138042	5.69254	2.36263	0.0354887	1.44991	0.124391	-5.21648
CG12400	0.137856	8.23809	1.39927	0.186544	0.729218	0.372136	-6.69817
CG6279	0.137716	1.45217	0.110451	0.913841	0.0391294	0.954932	-6.41292
Pfrx	0.137656	8.14537	2.00142	0.0680057	1.16745	0.192352	-5.81044
Ant2	0.137632	1.32024	0.190648	0.851925	0.0695986	0.92275	-6.43566
CG7069	0.137526	2.21991	0.290735	0.776118	0.110072	0.874775	-6.79509
Rs1	0.137482	5.03294	2.89714	0.0131515	1.88102	0.0623449	-4.19351
rush	0.137455	6.76022	2.54392	0.0254126	1.59495	0.098851	-4.91582
stc	0.137387	5.93806	3.1858	0.00765528	2.11604	0.0430982	-3.7259
CG6340	0.137347	6.01212	3.10424	0.00891986	2.04964	0.0476409	-3.88325
CheB93a	0.137292	2.77185	1.41474	0.18206	0.739785	0.366726	-6.68014
LamC	0.13714	6.31492	2.26388	0.0424922	1.37169	0.140821	-5.41338
Ptpmeg	0.137097	6.62272	3.27203	0.00651365	2.18618	0.0382923	-3.57341
TfIIS	0.137058	4.57645	3.42435	0.00489995	2.30981	0.0314686	-3.13333
CG13404	0.136986	3.39365	1.68632	0.117018	0.931747	0.274348	-5.94181
Cog3	0.136952	4.9998	3.1792	0.00775058	2.11067	0.0434389	-3.65497
DnaJ-H	0.136869	6.67798	3.64876	0.00322865	2.49098	0.0237759	-2.86091
CG31345	0.136826	4.37302	2.23906	0.0444492	1.35214	0.14492	-5.25847
CG15067	0.136825	8.66926	1.3136	0.213053	0.671512	0.406616	-6.79708
hay	0.136821	4.46927	2.79059	0.0160542	1.79441	0.0712702	-4.2917
CG17258	0.136817	-0.255884	0.28132	0.783161	0.106149	0.879934	-6.01377
CG7728	0.136796	4.70055	2.80919	0.0155053	1.80952	0.069513	-4.29837
Pk17E	0.136708	5.59641	3.69117	0.00298503	2.52505	0.0225198	-2.749
CG32495	0.136663	6.24475	2.45734	0.0298211	1.52548	0.110494	-5.07278
l(3)72Dn	0.136518	2.94636	1.67986	0.118289	0.927054	0.276506	-5.81376
CG7386	0.136437	2.21986	1.12656	0.281517	0.550496	0.487387	-6.25352
CG5315	0.136399	9.28981	2.44469	0.0305242	1.51536	0.112184	-5.02492
CG14132	0.136331	3.45871	1.63198	0.12811	0.892417	0.292349	-6.11016
IntS11	0.136292	5.1664	3.23873	0.00693264	2.1591	0.0401378	-3.56986
Dpck	0.136276	3.618	2.05011	0.0623908	1.20488	0.181189	-5.42765
CG14044	0.136139	0.300484	0.669162	0.515807	0.287513	0.700144	-6.05122
CG8237	0.136051	3.74902	2.84214	0.0145782	1.83629	0.0668367	-4.06402
CG11696	0.136045	3.47068	1.49898	0.159203	0.798049	0.336558	-6.23794
CG2129	0.136028	2.21111	1.36258	0.197545	0.704335	0.386931	-6.0269
osm-1	0.135883	4.25135	1.49509	0.160202	0.795333	0.337929	-6.35937
Plap	0.135804	5.13921	1.71886	0.110788	0.955507	0.264478	-6.21592
Tango2	0.135579	2.77702	0.593416	0.5637	0.248952	0.735578	-6.89798
wtrw	0.135558	6.63983	3.19694	0.00749713	2.1251	0.0423989	-3.71405
CG14671	0.135468	3.99405	1.87961	0.084155	1.07492	0.221073	-5.77257
ft	0.135464	3.35165	1.20647	0.250423	0.601326	0.45041	-6.53941
Dbp45A	0.135415	4.66143	2.65744	0.0205816	1.68652	0.0853058	-4.58328
Ncc69	0.135302	7.11086	2.3282	0.0377951	1.42256	0.129567	-5.29247
CG9947	0.135249	5.63168	3.27317	0.0064997	2.18711	0.0382815	-3.54666
blos1	0.135232	3.48385	2.10232	0.0568511	1.24526	0.169182	-5.31319
fus	0.13517	7.39435	1.44818	0.172676	0.762767	0.355271	-6.65265
Tango10	0.135081	5.30665	3.60982	0.0034702	2.45965	0.0248518	-2.88156
His3.3A	0.135031	6.93631	2.37593	0.0346345	1.46049	0.122506	-5.20982
Syx8	0.134956	4.1549	1.82952	0.0917566	1.03736	0.23315	-5.90882
stwl	0.134869	4.04207	2.22393	0.0456842	1.34023	0.147416	-5.23296
fbp	0.134817	6.77756	1.89586	0.0818145	1.08717	0.216978	-6.02213
Adam	0.134706	7.42295	3.33446	0.00579567	2.2369	0.035393	-3.43125
Obp49a	0.134595	3.95696	1.2728	0.226718	0.644514	0.422922	-6.8945
CG3967	0.134591	6.17263	4.11388	0.00137739	2.86094	0.0127413	-1.99084
CG11964	0.134417	5.12441	2.5984	0.0229698	1.63884	0.0922579	-4.75295
CG3036	0.134399	8.54734	1.2703	0.227579	0.642868	0.423966	-6.85685
toe	0.134363	3.527	1.10502	0.290384	0.537027	0.497566	-6.77164
HLH106	0.134349	8.83429	3.14546	0.00825645	2.08321	0.0453085	-3.75482
Spn1	0.134221	5.90847	1.83179	0.0913987	1.03906	0.232641	-6.11412
Syx7	0.134059	6.74085	4.743	0.000451775	3.34508	0.00560154	-0.836304
Caf1-105	0.133949	2.15218	1.32423	0.209607	0.678594	0.402344	-6.05082
CG18343	0.133944	4.73461	3.11549	0.00873373	2.0588	0.0470999	-3.73963
CG5111	0.133822	-2.12876	0.0726637	0.943247	0.0253746	0.970138	-5.32239
CG7841	0.133815	6.11526	2.146	0.0525736	1.27923	0.160467	-5.60399
hoe2	0.133748	2.70672	1.57035	0.141794	0.848342	0.31275	-5.84446
Mdh2	0.133735	9.44736	2.01906	0.0659193	1.18099	0.188639	-5.74909
SdhA	0.133733	11.1351	2.79079	0.0160481	1.79458	0.0712702	-4.35425
CR43215	0.133616	2.05516	1.17695	0.261582	0.582392	0.464297	-6.2319
Atg8a	0.13358	9.31387	3.44971	0.00467362	2.33035	0.0304456	-3.16995
CG5326	0.133412	4.83306	1.22578	0.243327	0.613809	0.441862	-6.86898
CG17786	0.133359	1.22898	0.860719	0.405926	0.391553	0.606604	-6.18419
TrxT	0.133354	-0.286474	0.0665472	0.948016	0.0231843	0.97282	-5.79434
CG18858	0.133167	5.87742	2.35126	0.0362356	1.44087	0.1263	-5.23995
CG7800	0.133139	4.59506	2.19952	0.0477444	1.32108	0.150682	-5.3603
Pi4KIIalpha	0.133139	6.42994	3.73729	0.00274133	2.56204	0.0211374	-2.69718
l(3)72Dr	0.133113	2.02474	1.03399	0.321127	0.493323	0.529409	-6.27987
CG32264	0.133082	7.97583	2.24697	0.043817	1.35836	0.143882	-5.40845
CG13924	0.132988	0.672098	0.853856	0.409573	0.387668	0.609346	-6.0714
CG11652	0.132852	4.46979	2.54234	0.025487	1.59368	0.0989813	-4.75151
Pros45	0.132627	6.89411	3.2662	0.00658508	2.18144	0.0385725	-3.57834
CG10214	0.132623	4.84404	2.82628	0.0150175	1.8234	0.0681055	-4.29974
CG30203	0.132588	3.25883	1.72626	0.109414	0.960928	0.262956	-5.83082
Dip-C	0.132582	5.21607	1.9882	0.0696082	1.15734	0.195392	-5.80546
CG10960	0.132501	7.33966	1.64165	0.126071	0.899386	0.28915	-6.39058
RpS3	0.132492	9.6776	1.90549	0.0804555	1.09444	0.215086	-5.92217
endos	0.132448	6.09326	3.52479	0.00406388	2.39106	0.0277597	-3.09414
Bap60	0.13233	5.03782	2.53496	0.0258377	1.58775	0.0998824	-4.85402
Aats-asp	0.13224	6.7015	1.39735	0.187106	0.727912	0.372906	-6.74533
CG7009	0.132081	3.55412	1.98206	0.0703645	1.15265	0.196533	-5.53842
Marf	0.13202	9.85484	2.9728	0.011413	1.9426	0.0566465	-4.0463
CG3704	0.131978	4.5448	2.68779	0.0194506	1.71107	0.0815469	-4.51773
CG9360	0.131958	4.91765	2.33286	0.0374748	1.42626	0.128955	-5.20328
[truncated: 7,996 more rows]
