# Supplementary material for: Circadian gene variants and the skeletal muscle circadian clock contribute to the evolutionary divergence in longevity across Drosophila populations
Source: HighWire-hosted journal article supplement (doi:10.1101/gr.246884.118), 2019-06-27
Supplement: Supplemental_Table_S9.xlsx [file Supplemental_Table_S9.xlsx]

## Sheet: Legend
Supplemental Table S9
Circadian RNA-seq of skeletal muscle with timeless overexpression (Mhc>timOE) and controls (Mhc>+), and JTK analysis of muscle cyclic genes.
Analysis was performed using log2 FPKM values transformed after the addition of 2 to prevent negative numbers and reduce the effect of low expressing genes.

## Sheet: JTK analysis of Mhc>+
Probeset - Mhc>+	BHQ	ADJP	PER	LAG	AMP	sample_1618509_mhc_zt0_rep1_merg	sample_1618510_mhc_zt0_rep2_merg	sample_1618511_mhc_zt0_rep3_merg	sample_1618512_mhc_zt6_rep1_merg	sample_1618513_mhc_zt6_rep2_merg	sample_1618514_mhc_zt6_rep3_merg	sample_1618515_mhc_zt12_rep1_mer	sample_1618516_mhc_zt12_rep2_mer	sample_1618517_mhc_zt12_rep3_mer	sample_1618518_mhc_zt18_rep1_mer	sample_1618519_mhc_zt18_rep2_mer	sample_1618520_mhc_zt18_rep3_mer
CG33965	0.0158768	3.78788e-05	24	0	0.55584	3.10303	3.19215	3.35241	2.4102	2.51529	2.29866	2.01934	1.99093	1.87784	2.93592	2.5686	2.66804
GIIIspla2	0.0158768	3.78788e-05	18	6	0.543839	6.00373	6.04995	5.99646	6.41006	6.39378	6.37551	5.05346	4.83037	5.63067	6.13672	6.28677	6.06672
CG6385	0.0158768	3.78788e-05	24	15	0.524053	3.40101	3.35952	3.37444	3.85766	3.66612	3.88026	4.45872	4.40529	4.64867	4.11751	4.07356	4.36737
CG5867	0.0158768	3.78788e-05	24	6	0.344623	8.74342	8.86637	8.70781	8.88091	9.0147	8.97519	8.51745	8.67606	8.61791	8.21748	7.97755	7.79614
Pdp1	0.0158768	3.78788e-05	24	18	0.303729	5.3136	5.2188	5.17156	5.10535	5.11264	5.1007	5.36555	5.33873	5.35381	5.95666	5.81069	5.81574
CG7299	0.0158768	3.78788e-05	24	15	0.303217	1.53105	1.56234	1.54	1.63975	1.68991	1.74554	3.53467	2.63528	3.14571	1.9116	1.79645	1.76375
Cyp6d5	0.0158768	3.78788e-05	24	18	0.301234	7.19335	7.2246	7.15144	7.11098	7.0645	6.94835	7.47018	7.35263	7.47813	7.65155	7.6273	7.62239
CG3590	0.0158768	3.78788e-05	18	12	0.270635	5.09474	5.05716	5.14269	5.23014	5.24233	5.14911	5.49735	5.53444	5.62507	4.64571	4.89475	4.8946
CG3609	0.0158768	3.78788e-05	18	12	0.261137	8.04413	7.89151	7.85535	8.22465	8.10292	8.09851	8.43911	8.30725	8.6027	7.70936	7.75304	7.6466
CG13283	0.0158768	3.78788e-05	24	3	0.215748	4.75223	4.70604	4.59326	4.57974	4.59153	4.53255	4.26581	4.15474	4.28685	4.46205	4.399	4.35641
out	0.0158768	3.78788e-05	24	15	0.151283	4.03481	3.98174	4.0135	4.09914	4.10289	4.068	4.32587	4.36582	4.32611	4.1414	4.18004	4.20973
CG7322	0.0158768	3.78788e-05	18	12	0.130452	6.85898	6.96296	6.96305	7.04347	7.04417	6.97172	7.25468	7.09946	7.24102	6.77032	6.80042	6.71254
l(2)k16918	0.0158768	3.78788e-05	24	12	0.127468	3.47722	3.48853	3.4618	3.66894	3.59338	3.65917	3.71791	3.69884	3.69214	3.54005	3.49743	3.52376
CG32640	0.0158768	3.78788e-05	24	18	0.124682	3.90736	3.95369	3.91725	3.86729	3.89771	3.86649	4.00966	3.9648	4.04819	4.24124	4.13181	4.1101
P5cr	0.0158768	3.78788e-05	24	0	0.116656	5.52181	5.6408	5.57149	5.40353	5.34894	5.43916	5.32062	5.34208	5.3258	5.51686	5.48262	5.46559
CG15385	0.0158768	3.78788e-05	24	3	0.084481	4.0925	4.02322	4.028	3.96319	3.9546	3.95388	3.84166	3.86104	3.84861	3.89542	3.86898	3.91374
CG3608	0.0158768	3.78788e-05	18	3	0.0832683	3.13889	3.09813	3.14402	3.08007	3.02534	3.07915	2.94939	2.98023	2.98846	3.15736	3.15173	3.20144
Lig4	0.0158768	3.78788e-05	18	6	0.0789632	2.5817	2.59452	2.54785	2.67882	2.65099	2.66455	2.53912	2.53892	2.53791	2.60722	2.64853	2.64948
CG9393	0.0158768	3.78788e-05	18	3	0.0725917	3.54327	3.51433	3.52867	3.51193	3.45124	3.46584	3.42601	3.40415	3.34742	3.57473	3.59206	3.62738
Psc	0.0158768	3.78788e-05	18	6	0.0698036	1.61007	1.6255	1.59552	1.67196	1.70387	1.69468	1.54133	1.53639	1.58556	1.63746	1.64916	1.67047
CG12263	0.0158768	3.78788e-05	24	0	0.0671299	2.85974	2.86886	2.86748	2.76999	2.80523	2.82016	2.74409	2.66451	2.67997	2.83647	2.84538	2.83161
Spn43Ab	0.0158768	3.78788e-05	18	12	0.0654791	8.12686	8.10632	8.11121	8.16759	8.16578	8.12713	8.30376	8.19892	8.24708	8.04061	8.08653	8.006
Ptr	0.0158768	3.78788e-05	24	21	0.0644923	2.37149	2.39595	2.39163	2.27426	2.27489	2.30914	2.33776	2.32997	2.36155	2.42604	2.40999	2.44499
jim	0.0158768	3.78788e-05	24	9	0.0595896	3.55191	3.53514	3.52508	3.60918	3.65541	3.66047	3.58481	3.59374	3.55275	3.51662	3.4811	3.51244
CG11490	0.0158768	3.78788e-05	18	3	0.0590002	3.55453	3.5358	3.53118	3.47596	3.51322	3.4793	3.47109	3.41689	3.36837	3.61407	3.57912	3.7022
CG3925	0.0158768	3.78788e-05	18	3	0.053898	4.33258	4.31899	4.34714	4.29703	4.31005	4.29141	4.19816	4.24838	4.22902	4.37311	4.35806	4.47809
CG6424	0.0158768	3.78788e-05	18	12	0.0380512	6.59293	6.59532	6.55918	6.64569	6.62864	6.6215	6.65155	6.6995	6.64996	6.38635	6.44486	6.40426
tim	0.0276564	0.000151515	24	21	0.827342	5.58378	5.53217	5.49501	4.64776	4.7394	4.6403	5.45459	5.41595	5.52941	6.90131	6.94211	7.05588
CG10026	0.0276564	0.000151515	18	12	0.382042	4.22561	4.04858	4.27995	4.45277	4.37715	4.34965	4.97724	4.96527	4.7659	4.01458	4.20025	3.97883
Fmo-1	0.0276564	0.000151515	18	0	0.256387	3.48686	3.60751	3.71028	3.15823	3.12428	3.08118	3.19813	3.23041	3.29054	3.35273	3.26065	3.34598
CG17124	0.0276564	0.000151515	24	3	0.239699	6.66732	6.70323	6.86203	6.36917	6.56451	6.50483	6.18355	6.06307	6.23706	6.3753	6.32476	6.36261
CG31075	0.0276564	0.000151515	18	12	0.233176	7.05946	7.23837	7.28381	7.70825	7.63692	7.58593	7.72073	7.74756	7.74233	6.94308	7.13029	6.98767
Hsp70Ab	0.0276564	0.000151515	24	3	0.22396	2.17791	1.98704	2.04953	1.99916	1.95988	1.94116	1.64211	1.51905	1.64539	1.69338	1.80736	1.82055
CG33470	0.0276564	0.000151515	24	6	0.202738	1.50606	1.42307	1.35115	1.43216	1.5531	1.73296	1.3169	1.27498	1.17038	1.1409	1.15513	1.09053
CG43103	0.0276564	0.000151515	24	3	0.200103	6.02707	6.14335	6.20052	5.97182	5.92263	6.0402	5.67569	5.65793	5.6736	5.87559	5.91024	5.82463
Ance-5	0.0276564	0.000151515	24	3	0.163022	6.23089	6.27668	6.27748	6.05841	6.03539	5.96652	5.82774	5.85528	5.85574	5.96616	6.02172	5.94802
Orct	0.0276564	0.000151515	18	15	0.158917	3.97063	3.81388	3.87988	3.73585	3.74589	3.78415	4.12754	4.03612	4.04157	3.79483	3.8044	3.83205
Ada2b	0.0276564	0.000151515	18	6	0.158783	3.78081	3.8425	3.83987	3.93949	3.96793	3.913	3.55452	3.5957	3.68845	3.89004	3.86039	3.91453
CG8323	0.0276564	0.000151515	18	0	0.126704	4.77309	4.72659	4.72952	4.56747	4.52106	4.48643	4.64946	4.5939	4.54425	4.71116	4.7206	4.7156
CG6279	0.0276564	0.000151515	24	18	0.122736	1.62731	1.59299	1.59878	1.5529	1.48838	1.51597	1.68724	1.72878	1.64733	1.69589	1.80674	1.85223
CG12010	0.0276564	0.000151515	18	3	0.122578	2.43289	2.44979	2.45612	2.35921	2.41233	2.36077	2.18742	2.21159	2.25846	2.457	2.4557	2.4841
CR43916	0.0276564	0.000151515	18	6	0.12169	2.15068	2.14373	2.08052	2.22077	2.28717	2.31306	1.958	2.04868	2.04019	2.23037	2.17817	2.17475
Tre1	0.0276564	0.000151515	24	15	0.120235	3.31686	3.3786	3.37522	3.42134	3.44408	3.46031	3.64821	3.55978	3.58035	3.47161	3.58003	3.5566
CG18347	0.0276564	0.000151515	18	12	0.114562	4.94308	4.96317	5.00534	5.09369	5.00325	5.00734	5.22656	5.15598	5.16735	4.73296	4.72099	4.73033
ppa	0.0276564	0.000151515	24	12	0.111647	3.38229	3.30735	3.30474	3.42484	3.51293	3.4474	3.6358	3.61383	3.54994	3.36047	3.40889	3.41411
CG7818	0.0276564	0.000151515	18	3	0.108959	3.47091	3.43757	3.393	3.38822	3.34441	3.35609	3.25859	3.23413	3.14376	3.57448	3.45137	3.48449
CG15279	0.0276564	0.000151515	18	12	0.103843	3.80531	3.71605	3.77509	3.92615	3.96479	3.90804	3.98605	4.06381	3.97689	3.6481	3.73329	3.63202
mia	0.0276564	0.000151515	24	3	0.10036	2.68988	2.65669	2.82859	2.5302	2.59462	2.63105	2.50676	2.4833	2.47083	2.51544	2.48996	2.52225
RfC38	0.0276564	0.000151515	18	3	0.091999	2.55613	2.59383	2.57312	2.46386	2.48271	2.56456	2.33487	2.46197	2.40518	2.65574	2.61979	2.64671
rt	0.0276564	0.000151515	24	9	0.0874284	1.83003	1.77386	1.76182	1.86985	1.88807	1.85988	1.86451	1.85621	1.85668	1.66239	1.65772	1.68923
CG9272	0.0276564	0.000151515	18	3	0.0854517	2.58713	2.51963	2.58651	2.51207	2.5765	2.51717	2.40134	2.37988	2.45565	2.69058	2.61866	2.59561
cry	0.0276564	0.000151515	18	12	0.0850289	7.00078	7.06054	7.04748	7.25119	7.30821	7.22424	7.31167	7.29676	7.32258	6.99578	6.90284	6.9199
CG3857	0.0276564	0.000151515	24	3	0.0794136	2.07008	2.08659	2.12793	2.0661	2.06313	2.06364	1.9513	1.96523	1.89684	1.95865	1.97386	2.0104
CG14040	0.0276564	0.000151515	24	0	0.0769547	3.71585	3.7634	3.75652	3.64505	3.65671	3.68723	3.49925	3.60916	3.56888	3.75587	3.71037	3.714
CG5924	0.0276564	0.000151515	24	21	0.0766151	2.32628	2.344	2.33126	2.11894	2.26605	2.21164	2.31036	2.2724	2.22891	2.35583	2.37103	2.41121
simj	0.0276564	0.000151515	18	12	0.0706445	3.77976	3.83211	3.79243	3.86757	3.82833	3.85984	3.99539	3.92823	3.91372	3.7116	3.74411	3.76852
CG31688	0.0276564	0.000151515	18	12	0.0677307	2.24604	2.1789	2.17974	2.27867	2.22981	2.30726	2.44921	2.31708	2.33201	1.94951	1.9985	2.11912
CG10584	0.0276564	0.000151515	18	3	0.0643714	3.90687	3.87894	3.95778	3.83754	3.85069	3.86707	3.76434	3.77679	3.7879	3.96714	3.95774	3.99632
CG9850	0.0276564	0.000151515	24	6	0.0578647	2.70371	2.68149	2.71559	2.71984	2.73231	2.70567	2.67377	2.67133	2.64459	2.57048	2.58589	2.61318
fax	0.0276564	0.000151515	24	9	0.0512848	5.89687	5.88343	5.83431	5.95985	5.93197	5.92102	5.92023	5.90234	5.90963	5.85882	5.79523	5.82649
dikar	0.0276564	0.000151515	24	6	0.0470228	3.09851	3.10066	3.11608	3.15562	3.12995	3.18611	3.09604	3.06428	3.09334	2.9093	2.97995	3.07697
Hpr1	0.0276564	0.000151515	18	3	0.0338798	3.73051	3.74857	3.71085	3.71434	3.7063	3.70575	3.63988	3.68673	3.64735	3.78119	3.83551	3.86221
CG5966	0.0428674	0.000492424	18	6	0.900319	5.60801	5.1587	4.86497	6.13821	5.92801	5.80316	3.71112	3.32558	5.05449	5.73163	5.74534	5.41754
TotX	0.0428674	0.000492424	24	6	0.709332	7.32265	7.52698	7.8553	7.62376	7.67758	8.01026	6.88552	7.10027	6.79529	6.39861	6.42774	6.46185
CG17633	0.0428674	0.000492424	24	0	0.612494	6.25386	6.37084	6.74146	6.07552	5.56786	6.07296	5.01861	5.03996	4.91703	6.12512	6.43878	6.20139
CG1628	0.0428674	0.000492424	24	18	0.455379	3.70644	3.86913	4.09336	3.67711	3.69215	3.81104	4.44311	4.19105	4.27978	4.60438	4.34385	4.81323
CG5958	0.0428674	0.000492424	18	15	0.35805	6.46361	6.21505	6.30637	6.16543	5.9321	6.02962	6.92265	6.86226	6.8076	6.20436	6.17775	6.40116
CG8129	0.0428674	0.000492424	24	0	0.344602	5.72413	5.55267	5.40903	5.1652	4.99412	5.06764	4.95356	4.68324	4.96744	5.22085	5.62742	5.32054
Sodh-1	0.0428674	0.000492424	24	12	0.333613	7.42518	7.46206	7.34849	7.85093	7.91778	7.72596	8.35486	8.19539	8.38664	7.86728	7.72563	7.72292
IM14	0.0428674	0.000492424	24	9	0.329396	9.34017	9.7861	9.63553	9.94296	9.86648	10.2434	9.81451	9.74957	9.64262	9.31872	9.32572	9.04195
fabp	0.0428674	0.000492424	24	9	0.328053	4.01181	3.99971	4.3187	4.41846	4.51604	4.46964	4.25861	4.20943	4.32273	3.73711	3.83497	3.74144
CG9914	0.0428674	0.000492424	18	12	0.295062	8.34514	8.4391	8.43389	8.70011	8.65684	8.61818	9.14312	8.71195	9.11739	8.41667	8.34037	8.37127
CG4500	0.0428674	0.000492424	18	12	0.265255	1.20809	1.11743	1.15454	1.20159	1.23257	1.19919	1.5396	1.58863	1.59519	1.0574	1.08808	1.09351
Est-Q	0.0428674	0.000492424	24	12	0.252174	5.32665	5.34235	5.37182	5.86047	5.85754	5.68865	5.96094	5.94982	5.98442	5.7824	5.83831	5.59246
CG6908	0.0428674	0.000492424	24	15	0.250595	5.11582	5.03418	5.14837	5.26417	5.2605	5.14651	5.60564	5.51012	5.68496	5.32086	5.33745	5.5207
Got1	0.0428674	0.000492424	18	12	0.231927	7.82951	7.80573	7.78601	7.90868	7.88658	7.79783	8.15344	8.14194	8.21792	7.60712	7.68105	7.59486
CG2918	0.0428674	0.000492424	24	3	0.205155	6.44005	6.38986	6.39989	6.39389	6.35748	6.39818	6.04406	6.05741	6.01368	6.14959	6.19357	6.21982
P58IPK	0.0428674	0.000492424	24	3	0.192496	5.99626	5.95919	5.95783	5.93134	5.84546	5.96218	5.63477	5.65888	5.61698	5.69716	5.69018	5.78953
C1GalTA	0.0428674	0.000492424	24	15	0.168642	4.12089	4.10718	4.15482	4.16619	4.19924	4.19918	4.56228	4.58189	4.47202	4.1945	4.23127	4.38438
olf186-M	0.0428674	0.000492424	24	15	0.158371	4.26248	4.16705	4.00364	4.25631	4.27937	4.2549	4.63438	4.65328	4.48491	4.37454	4.33122	4.30899
CG42759	0.0428674	0.000492424	18	3	0.146687	3.18095	3.16533	2.97054	2.97187	2.82203	2.94808	2.76442	2.7545	2.92563	3.27015	3.37568	3.24883
Sp212	0.0428674	0.000492424	24	9	0.136819	4.46467	4.52662	4.50445	4.65635	4.73716	4.78149	4.66581	4.58864	4.59138	4.43255	4.46866	4.46226
Gprk2	0.0428674	0.000492424	18	12	0.124826	3.67025	3.7526	3.74974	3.7931	3.8038	3.81632	3.92092	3.99851	3.98033	3.64366	3.69306	3.67046
cdc16	0.0428674	0.000492424	18	3	0.119028	3.06564	3.0553	3.0979	2.98657	3.04658	2.97285	2.88521	2.8547	2.87648	3.07492	3.10843	3.06998
Sir2	0.0428674	0.000492424	18	6	0.118778	4.67092	4.6497	4.72861	4.74429	4.77892	4.76369	4.35852	4.3698	4.42379	4.74418	4.71448	4.71139
Ugt86Dc	0.0428674	0.000492424	24	15	0.114354	1.55233	1.55224	1.6683	1.70059	1.6291	1.56495	1.81063	1.76708	1.84299	1.74156	1.75832	1.71401
CG6287	0.0428674	0.000492424	18	12	0.113733	8.23042	8.29061	8.25666	8.36585	8.26696	8.27759	8.54068	8.41537	8.45145	8.13914	8.16568	8.17156
Gclc	0.0428674	0.000492424	18	15	0.10983	5.85608	5.76044	5.83335	5.67803	5.69794	5.67467	5.90837	5.81784	5.88344	5.71041	5.75105	5.71132
yps	0.0428674	0.000492424	24	6	0.107404	7.46102	7.47336	7.50082	7.49526	7.64251	7.59941	7.46049	7.4133	7.35537	7.38265	7.30699	7.32252
CG30344	0.0428674	0.000492424	24	18	0.106934	4.84358	4.75351	4.79625	4.68294	4.81364	4.73607	4.9062	4.88592	4.88039	4.96439	4.92387	5.03844
CG4925	0.0428674	0.000492424	24	3	0.105408	3.13781	3.08448	3.2034	3.11898	3.06035	3.10815	2.9127	2.90757	2.90221	3.03251	3.01343	3.05644
CG10249	0.0428674	0.000492424	24	6	0.104509	4.35378	4.42348	4.38252	4.40515	4.41749	4.44242	4.33838	4.2979	4.34514	4.00224	4.19465	4.17625
CG13689	0.0428674	0.000492424	18	3	0.103808	2.22167	2.15395	2.19852	2.21229	2.14086	2.151	1.96365	1.97581	2.06548	2.31124	2.22509	2.2732
ptc	0.0428674	0.000492424	18	12	0.100283	2.47299	2.47853	2.59069	2.59802	2.56324	2.54061	2.81826	2.61725	2.73251	2.29283	2.44523	2.47297
snoRNA:2R:9445205	0.0428674	0.000492424	18	12	0.0991826	1.54668	1.67105	1.688	1.69903	1.60463	1.73363	1.82895	1.7449	1.84945	1.41649	1.51045	1.5034
CG6066	0.0428674	0.000492424	18	6	0.0944339	3.00076	3.06344	3.09389	3.13907	3.13774	3.18317	3.03501	2.96113	3.00314	3.09588	3.0977	3.1221
D19A	0.0428674	0.000492424	18	6	0.0938787	3.43538	3.52662	3.47216	3.54146	3.56815	3.53949	3.27227	3.30266	3.29344	3.49114	3.50961	3.5345
Dcp2	0.0428674	0.000492424	24	9	0.0927643	4.52399	4.4951	4.49868	4.64814	4.56088	4.63691	4.53129	4.60853	4.56775	4.49438	4.35127	4.36362
CG5537	0.0428674	0.000492424	18	3	0.0927185	5.22397	5.2212	5.21336	5.20631	5.20644	5.18967	5.08051	4.93639	5.07947	5.21792	5.28432	5.36774
Prosap	0.0428674	0.000492424	24	9	0.0910939	3.60899	3.6467	3.66915	3.77497	3.75101	3.80536	3.70968	3.65069	3.70661	3.49324	3.55712	3.62085
CG43693	0.0428674	0.000492424	24	21	0.0899572	6.23677	6.32745	6.25516	6.13961	6.1812	6.22328	6.18439	6.23211	6.18821	6.35141	6.35251	6.34994
Pgi	0.0428674	0.000492424	18	12	0.088637	8.21135	8.24657	8.243	8.25529	8.28934	8.2213	8.43815	8.3584	8.40563	8.16786	8.19193	8.17481
Tsp42Eg	0.0428674	0.000492424	18	15	0.0858105	5.76971	5.76331	5.81575	5.69085	5.70059	5.74085	5.92937	5.88436	5.89106	5.79333	5.75361	5.76102
Trs23	0.0428674	0.000492424	18	3	0.0840377	4.79273	4.85134	4.88262	4.80678	4.78171	4.82701	4.64439	4.66659	4.7325	4.97663	4.93434	4.90153
CG6978	0.0428674	0.000492424	24	6	0.0810152	1.48146	1.48919	1.54924	1.58819	1.60562	1.53781	1.4318	1.44917	1.48334	1.40726	1.39903	1.4108
yki	0.0428674	0.000492424	18	6	0.0800035	5.27716	5.28077	5.34147	5.35798	5.39391	5.36734	5.23325	5.21325	5.23671	5.34424	5.29783	5.28121
CG17068	0.0428674	0.000492424	18	6	0.0796357	2.76248	2.77332	2.7848	2.8656	2.8803	2.8213	2.67574	2.65539	2.67594	2.79532	2.81623	2.86658
l(3)neo38	0.0428674	0.000492424	18	9	0.0791781	3.08519	3.01908	3.0256	3.2275	3.11373	3.25924	3.1021	3.11194	3.16773	3.08858	3.07873	3.0905
CG11927	0.0428674	0.000492424	18	6	0.0769208	3.44076	3.45935	3.43518	3.50166	3.56958	3.53013	3.34641	3.3561	3.39358	3.52239	3.51943	3.4949
CG1418	0.0428674	0.000492424	24	3	0.0755521	4.71303	4.65464	4.67542	4.61403	4.59637	4.65014	4.43306	4.47772	4.50515	4.63043	4.595	4.58686
CG5861	0.0428674	0.000492424	18	3	0.0755189	4.82573	4.76392	4.7851	4.73627	4.79847	4.73839	4.62177	4.59375	4.72497	4.90886	4.84172	4.88287
MTF-1	0.0428674	0.000492424	24	15	0.0754372	3.81567	3.79355	3.81013	3.86719	3.8266	3.89308	4.05517	3.96684	3.99903	3.85228	3.8954	3.91041
CG3909	0.0428674	0.000492424	24	21	0.0736054	4.0843	4.10423	4.09591	4.02211	3.99321	3.99734	4.04901	4.05323	3.99463	4.1605	4.14214	4.16546
Arf72A	0.0428674	0.000492424	18	3	0.0694793	5.17066	5.12159	5.12163	5.10602	5.10634	5.09682	5.03213	4.96095	5.00777	5.16542	5.1803	5.16588
Pex12	0.0428674	0.000492424	24	3	0.0693527	2.79766	2.6537	2.63301	2.61052	2.60916	2.57246	2.51735	2.36222	2.49881	2.57914	2.54324	2.59892
ZnT63C	0.0428674	0.000492424	18	15	0.068674	4.89587	4.89267	4.88029	4.83619	4.78317	4.7504	4.97306	4.91493	4.92533	4.85206	4.82306	4.78973
Gmd	0.0428674	0.000492424	24	0	0.0672546	3.87701	3.85401	3.81333	3.78235	3.78021	3.75125	3.74122	3.67494	3.70997	3.79486	3.83678	3.84818
CG12214	0.0428674	0.000492424	24	15	0.0672437	5.87907	5.94897	5.8617	5.97573	5.95365	5.95595	6.11749	6.00506	6.04954	6.04679	5.97584	5.97091
CG15443	0.0428674	0.000492424	18	3	0.0671764	3.65456	3.62851	3.58454	3.61162	3.55911	3.58158	3.44948	3.45365	3.56252	3.77119	3.6567	3.73284
CG34417	0.0428674	0.000492424	24	6	0.0663466	5.60978	5.59091	5.61633	5.61725	5.66194	5.67526	5.58047	5.52805	5.53292	5.38202	5.5167	5.55691
Mdh1	0.0428674	0.000492424	18	12	0.0654518	8.64627	8.67513	8.65898	8.68692	8.70072	8.65248	8.81998	8.74504	8.85932	8.54217	8.61112	8.53172
CG8545	0.0428674	0.000492424	24	0	0.0544644	3.46272	3.4115	3.3907	3.36286	3.33922	3.35917	3.29315	3.33092	3.26833	3.3701	3.37024	3.43704
robl	0.0428674	0.000492424	18	3	0.0518091	6.536	6.535	6.55185	6.49936	6.43155	6.48897	6.36719	6.3654	6.49929	6.63405	6.57874	6.57712
CG12992	0.0428674	0.000492424	18	12	0.0493299	1.48602	1.51511	1.37281	1.54567	1.39869	1.54795	1.55578	1.54939	1.56795	1.35069	1.33416	1.30862
SIDL	0.0428674	0.000492424	18	3	0.0491993	3.65994	3.68579	3.70129	3.63684	3.61737	3.66725	3.60869	3.54411	3.59767	3.6987	3.70691	3.83062
milt	0.0428674	0.000492424	18	12	0.0485944	4.85715	4.84691	4.83658	4.88443	4.90824	4.88387	4.94991	4.98825	4.91092	4.76302	4.84344	4.83765
Acph-1	0.0428674	0.000492424	18	3	0.0482096	3.60454	3.58113	3.56353	3.50797	3.56851	3.56245	3.45646	3.50805	3.49809	3.73377	3.67734	3.66602
Vap-33-1	0.0428674	0.000492424	24	9	0.0451483	5.92569	5.88706	5.87659	5.95216	5.94099	5.98256	5.91033	5.93082	5.91201	5.86263	5.81871	5.87574
CG32371	0.0428674	0.000492424	18	12	0.0347534	1.12187	1.10324	1.1327	1.18435	1.14112	1.14492	1.19407	1.26174	1.15947	1.07929	1.11834	1.09481
CG8915	0.0428674	0.000492424	18	3	0.0258947	1.95587	1.94527	1.95232	1.92488	1.89002	1.92664	1.84744	1.90459	1.91482	2.00936	1.96628	2.02968
CG15199	0.0583798	0.00132576	18	3	0.648977	5.53938	5.92035	5.8825	5.63328	5.66756	5.86537	4.72607	4.73801	4.93044	6.66017	6.95193	6.52439
LysC	0.0583798	0.00132576	24	6	0.417685	7.42188	7.4199	7.57254	7.74932	7.33392	7.61398	7.25485	6.87827	7.07885	6.82356	6.81792	6.78716
Prx2540-2	0.0583798	0.00132576	24	15	0.393573	3.17602	3.08949	2.91432	3.43559	3.32776	3.27469	3.72793	3.77052	3.95448	3.74838	3.81916	3.44836
Hsp83	0.0583798	0.00132576	24	3	0.348859	8.84645	8.74846	8.84602	8.81817	8.82888	8.77317	7.66	7.75574	7.81084	8.53729	8.51905	8.52573
CG14528	0.0583798	0.00132576	24	3	0.333378	6.08305	6.17019	6.20695	5.77412	5.80872	5.71237	5.45755	5.4707	5.44856	5.51117	5.51268	5.34763
CG17108	0.0583798	0.00132576	24	3	0.330286	11.1934	11.3218	11.1544	10.5945	10.8978	10.903	10.3247	10.412	10.4513	10.8322	10.6952	10.6886
Jon74E	0.0583798	0.00132576	18	3	0.325788	7.4151	7.78655	8.1018	7.66131	7.60262	7.69908	7.14189	7.20561	7.24733	8.84801	8.57296	8.78013
CG8408	0.0583798	0.00132576	18	12	0.308473	5.08055	5.01241	5.08006	5.04974	5.1761	5.0894	5.53709	5.50351	5.52565	4.98423	5.01213	5.03557
CG13813	0.0583798	0.00132576	24	21	0.298528	1.23595	1.22148	1.55071	1.1598	1.08025	1.11361	1.23326	1.12088	1.22546	1.62405	1.9051	2.25588
CG9485	0.0583798	0.00132576	18	15	0.278139	5.61243	5.567	5.68794	5.33966	5.24234	5.25377	5.87546	5.733	5.80124	5.13508	5.43797	5.50242
betaTry	0.0583798	0.00132576	24	0	0.254744	10.214	10.2782	10.3439	10.0604	9.77569	10.0921	9.43925	9.52233	9.8693	9.97572	10.1315	10.0922
Hsc70-3	0.0583798	0.00132576	24	3	0.245259	7.95124	7.91466	7.85	7.89783	7.78451	7.94015	7.47488	7.50036	7.42752	7.56056	7.69031	7.73179
ry	0.0583798	0.00132576	24	12	0.244589	4.25125	4.17527	3.84177	4.48708	4.49106	4.46563	4.58679	4.60145	4.7274	4.17272	4.36135	4.18063
Magi	0.0583798	0.00132576	24	6	0.226763	2.82613	2.85501	2.85656	2.85937	2.8865	2.82228	2.60623	2.62893	2.6073	2.41208	2.4563	2.46519
CG17181	0.0583798	0.00132576	18	15	0.221559	4.91751	4.99303	4.86259	4.60418	4.71157	4.79077	5.21579	5.2155	5.10029	4.77438	4.84764	4.92765
eas	0.0583798	0.00132576	24	15	0.217825	5.32824	5.31547	5.39619	5.37522	5.3607	5.36762	5.70668	5.74353	5.68446	5.66756	5.50894	5.57823
Sodh-2	0.0583798	0.00132576	24	15	0.214692	5.27567	5.31763	5.24449	5.50027	5.60765	5.5427	5.81952	5.79184	5.65655	5.79555	5.59299	5.63047
Lpin	0.0583798	0.00132576	18	12	0.21241	6.52609	6.56211	6.47857	6.65815	6.52085	6.53294	6.90462	6.87281	6.82124	6.32698	6.40241	6.44588
alpha-Est2	0.0583798	0.00132576	24	15	0.208822	4.44783	4.31766	4.31732	4.55361	4.68216	4.56067	4.95655	4.85246	4.80477	4.61965	4.82039	4.59497
CG9377	0.0583798	0.00132576	18	12	0.206093	7.33609	7.51406	7.50959	7.63193	7.86167	7.90394	7.93688	7.85473	7.88427	6.98307	6.84541	6.77433
CG10211	0.0583798	0.00132576	24	21	0.205842	2.79331	3.07382	2.83418	2.59899	2.71282	2.66535	2.78751	2.93021	2.74517	3.11684	3.20601	3.0733
CG13397	0.0583798	0.00132576	24	18	0.199466	2.96025	2.90319	2.97624	2.90842	2.89628	2.92968	3.08396	2.96477	3.18108	3.32145	3.32792	3.36877
mir-4945	0.0583798	0.00132576	24	6	0.195256	6.17822	6.09228	6.11677	5.97503	6.20948	6.18556	5.97441	5.92703	5.93968	5.36956	5.58138	5.86512
CG1544	0.0583798	0.00132576	24	15	0.195075	3.56076	3.67893	3.72385	3.78444	3.6503	3.79695	4.15028	3.95931	4.29675	3.78471	3.93328	3.94132
CG30033	0.0583798	0.00132576	18	15	0.185698	1.15197	1.28177	1.31131	1.09189	1.09725	1.12639	2.33401	2.33338	2.40674	1.18079	1.20353	1.16331
CG16704	0.0583798	0.00132576	24	15	0.18329	7.32881	7.29451	7.34802	7.46388	7.51101	7.39286	7.7005	7.86376	7.82714	7.59612	7.4776	7.43739
CG34376	0.0583798	0.00132576	24	12	0.182808	4.41495	4.23678	4.34268	4.52081	4.49492	4.47806	4.97934	4.89856	4.78457	4.43508	4.45541	4.63634
CG3759	0.0583798	0.00132576	18	15	0.176597	5.9391	6.02433	5.96282	5.84644	5.71217	5.89097	6.20735	6.24674	6.14306	5.93841	5.92068	6.07085
Hn	0.0583798	0.00132576	24	15	0.169313	7.95099	8.00576	7.99539	8.27117	8.16611	8.12249	8.34407	8.33529	8.34529	8.36176	8.2893	8.32216
Cht7	0.0583798	0.00132576	24	3	0.168673	2.55379	2.62969	2.59021	2.3439	2.25823	2.23027	2.13407	2.20087	2.06517	2.22933	2.23849	2.27745
CG8086	0.0583798	0.00132576	24	6	0.165122	5.9344	6.05645	6.07131	6.09028	6.26646	6.13711	5.85495	6.04476	5.84415	5.7894	5.87071	5.78193
CG6067	0.0583798	0.00132576	18	15	0.164546	7.10018	7.02119	7.10433	6.87163	6.90017	6.85436	7.2028	7.14874	7.20442	6.79558	6.91315	6.90639
CG3386	0.0583798	0.00132576	18	3	0.164517	3.60334	3.549	3.62938	3.56261	3.59324	3.56329	3.20129	3.23679	3.37068	3.75666	3.69667	3.7106
Sam-S	0.0583798	0.00132576	24	15	0.159253	6.81485	6.78005	6.68979	6.83089	6.83951	6.87281	7.07267	7.01706	7.0864	6.94199	6.95457	7.11939
ced-6	0.0583798	0.00132576	24	18	0.156744	6.67074	6.68315	6.66274	6.65996	6.72329	6.66193	6.85042	6.87844	6.77072	7.02625	6.91019	6.91755
CG11073	0.0583798	0.00132576	18	9	0.153807	6.06714	6.14484	6.08218	6.28465	6.42148	6.36343	6.29715	6.37648	6.24424	6.18913	6.1894	6.19298
CG13875	0.0583798	0.00132576	24	3	0.148246	1.99801	1.87284	1.98492	1.89625	1.92724	1.86407	1.62366	1.74499	1.65315	1.78963	1.7442	1.76234
CG34331	0.0583798	0.00132576	24	21	0.146762	6.74828	6.85887	6.86323	6.65053	6.70721	6.73945	6.71863	6.7216	6.75141	7.26461	6.964	7.08387
CG10420	0.0583798	0.00132576	24	0	0.143789	3.8005	3.7798	3.76033	3.65453	3.61594	3.62509	3.41278	3.48381	3.3499	3.72119	3.55687	3.71536
Gpdh	0.0583798	0.00132576	18	15	0.139244	7.99247	8.01244	8.00801	7.85804	7.79555	7.75959	8.07364	8.07697	8.02006	7.89732	7.99222	7.71503
CG31102	0.0583798	0.00132576	24	15	0.135974	4.74312	4.61887	4.53369	4.74124	4.64331	4.63655	4.93484	4.83981	4.84491	4.82723	4.81174	4.75428
Nplp2	0.0583798	0.00132576	24	3	0.134711	12.6967	12.7465	12.817	12.6737	12.5653	12.7623	12.5037	12.4265	12.5217	12.5734	12.5581	12.5276
CG10157	0.0583798	0.00132576	24	12	0.132936	5.43673	5.31291	5.31759	5.61244	5.5807	5.60811	5.70005	5.53335	5.63145	5.44215	5.46599	5.47829
CG4893	0.0583798	0.00132576	24	3	0.129779	5.57069	5.50237	5.63239	5.29069	5.38556	5.41177	5.24641	5.1714	5.22674	5.40117	5.33391	5.28928
ninaB	0.0583798	0.00132576	24	15	0.126535	1.79776	1.8235	1.85928	1.75319	1.85983	1.87159	2.03999	2.04084	2.93353	1.97657	1.96509	1.89329
CG34195	0.0583798	0.00132576	18	3	0.125687	3.19809	3.12397	3.16116	3.01185	3.04038	3.03624	2.85849	2.96073	2.87025	3.22912	3.12596	3.1704
CG9293	0.0583798	0.00132576	24	3	0.123229	4.54282	4.52387	4.56506	4.52815	4.48324	4.48347	4.23115	4.19694	4.2435	4.49224	4.36358	4.47465
Su(Ste):CR42418	0.0583798	0.00132576	24	0	0.119154	1.81018	1.43036	1.91141	1.40052	1.26332	1.33014	1.24532	1.29091	1.26039	1.3317	1.4237	1.44693
Kdm2	0.0583798	0.00132576	24	15	0.11529	3.68955	3.69869	3.72577	3.78775	3.85505	3.81932	4.00556	4.02077	3.9646	3.80107	3.84602	3.91755
TepII	0.0583798	0.00132576	24	12	0.112599	6.30212	6.26485	6.16666	6.40092	6.3883	6.42773	6.5289	6.53898	6.4619	6.29849	6.40486	6.36569
CG32667	0.0583798	0.00132576	18	3	0.110131	8.30345	8.43081	8.34898	8.26675	8.0176	8.29917	8.111	8.06548	8.22773	8.60667	8.44079	8.56005
CG18622	0.0583798	0.00132576	24	12	0.109574	4.13924	4.25264	4.19199	4.33982	4.34622	4.4076	4.47041	4.54042	4.48938	4.38636	4.29056	4.34478
Spec2	0.0583798	0.00132576	24	15	0.109136	2.72479	2.75222	2.75573	2.82095	2.79	2.80094	2.94068	3.00429	2.89614	2.8615	2.90888	2.97649
Fur1	0.0583798	0.00132576	24	9	0.108846	3.57177	3.53512	3.52078	3.67391	3.71272	3.6904	3.68055	3.65032	3.63259	3.41657	3.46867	3.56554
Ire1	0.0583798	0.00132576	18	12	0.107923	4.4125	4.35942	4.44975	4.44761	4.46379	4.41668	4.65004	4.58351	4.60024	4.33478	4.34008	4.41208
CR43727	0.0583798	0.00132576	24	0	0.107401	2.07532	2.06611	2.01642	1.93148	1.93454	1.93134	1.88288	1.84657	1.78906	2.03101	2.05229	2.06606
CG3838	0.0583798	0.00132576	24	15	0.105634	3.59335	3.57961	3.53977	3.6731	3.54632	3.59718	3.91509	3.84361	3.77894	3.61137	3.68115	3.67608
Syx5	0.0583798	0.00132576	24	3	0.104693	5.62925	5.5658	5.56886	5.64681	5.54529	5.51505	5.4206	5.38514	5.39546	5.47624	5.47228	5.45689
CG11474	0.0583798	0.00132576	18	15	0.102699	4.6677	4.61615	4.70719	4.54142	4.5595	4.52246	4.68622	4.76294	4.71531	4.58298	4.56592	4.53432
CG11975	0.0583798	0.00132576	24	18	0.101994	4.78771	4.80991	4.72256	4.70615	4.75309	4.80064	4.8456	4.88544	4.86922	4.95027	4.9159	4.96757
CG8078	0.0583798	0.00132576	18	3	0.0997366	3.65125	3.66095	3.64039	3.64695	3.64113	3.64855	3.47485	3.51021	3.48923	3.77647	3.78257	3.74328
CG32022	0.0583798	0.00132576	18	3	0.098065	3.73293	3.73444	3.70494	3.72985	3.5866	3.72529	3.66916	3.53788	3.42275	3.87346	3.79715	3.88066
clu	0.0583798	0.00132576	18	15	0.0968344	4.15793	4.11682	4.149	4.09924	4.05236	4.05327	4.33429	4.31022	4.21492	4.00346	4.11233	4.11492
Idgf1	0.0583798	0.00132576	24	0	0.0960373	6.2734	6.24509	6.16205	6.05823	6.13672	6.10054	6.00289	5.98168	6.08377	6.14169	6.12582	6.20333
CG11376	0.0583798	0.00132576	24	6	0.0952171	3.99841	3.91846	3.9853	4.03276	4.01282	4.10129	3.85478	3.92863	3.95056	3.78783	3.83882	3.89397
Rcd2	0.0583798	0.00132576	18	12	0.0940655	4.25169	4.26464	4.21853	4.32593	4.20976	4.33391	4.41525	4.38472	4.44314	4.18035	4.15255	4.19838
CG43340	0.0583798	0.00132576	24	12	0.0928475	3.56868	3.47015	3.59616	3.6628	3.69359	3.59931	3.76199	3.79967	3.97267	3.62409	3.60912	3.6335
CG11577	0.0583798	0.00132576	24	3	0.0913266	4.73791	4.68136	4.68895	4.71151	4.66384	4.67747	4.40046	4.53374	4.54059	4.59727	4.58524	4.66827
CG11660	0.0583798	0.00132576	18	6	0.0888079	3.18241	3.18989	3.19341	3.2084	3.31915	3.308	3.15913	3.0401	3.10797	3.19388	3.18793	3.27554
CG11777	0.0583798	0.00132576	18	3	0.0887615	3.78762	3.71601	3.71115	3.65019	3.69929	3.72332	3.52466	3.61566	3.51043	3.80308	3.7826	3.83715
CG8003	0.0583798	0.00132576	18	3	0.0875038	3.51034	3.60747	3.61166	3.54521	3.59953	3.58727	3.43	3.46027	3.47578	3.67431	3.63285	3.72442
CG31635	0.0583798	0.00132576	18	12	0.0866157	4.23367	4.13198	4.1935	4.22077	4.20665	4.22551	4.36373	4.34615	4.32914	3.98929	4.08467	4.04672
CG8910	0.0583798	0.00132576	18	12	0.0866003	2.50217	2.55645	2.54276	2.49808	2.58166	2.5618	2.6255	2.75869	2.75905	2.4945	2.47222	2.49747
CG10428	0.0583798	0.00132576	18	3	0.0865748	3.38969	3.34304	3.4121	3.33504	3.36386	3.33441	3.1999	3.26726	3.11273	3.43748	3.43508	3.38848
CG17271	0.0583798	0.00132576	24	6	0.0854779	5.4359	5.37204	5.46226	5.44092	5.52785	5.50559	5.33331	5.33873	5.35676	5.31675	5.31438	5.34201
PGRP-LC	0.0583798	0.00132576	24	15	0.0852755	5.18791	5.03187	5.0914	5.12082	5.15382	5.13468	5.27419	5.3155	5.25393	5.2033	5.2227	5.21222
CG9095	0.0583798	0.00132576	24	15	0.0824385	1.95371	1.98238	1.99871	2.01921	2.00355	1.97742	2.21708	2.12066	2.12162	2.0167	2.07784	2.09348
CG11696	0.0583798	0.00132576	18	6	0.0820792	2.98782	3.01467	3.04322	3.07219	3.0853	3.05296	2.93689	2.81493	2.91318	3.02495	2.99864	3.04942
skd	0.0583798	0.00132576	18	12	0.0812797	3.25034	3.26929	3.27973	3.34699	3.30439	3.3945	3.41934	3.41134	3.40326	3.06456	3.22754	3.28663
CG42748	0.0583798	0.00132576	24	6	0.0804998	3.71531	3.67618	3.62386	3.70768	3.67753	3.70591	3.58666	3.59455	3.605	3.49725	3.56392	3.56627
CG8005	0.0583798	0.00132576	18	3	0.0791437	2.8145	2.81827	2.70563	2.75631	2.65525	2.74205	2.62045	2.6669	2.59747	2.85847	2.85718	2.92851
CG7261	0.0583798	0.00132576	18	3	0.0757823	2.98731	3.00643	3.02128	2.95881	2.95196	2.99147	2.82228	2.89499	2.87817	3.00358	3.03927	3.04824
pigeon	0.0583798	0.00132576	24	0	0.0748357	2.54788	2.57767	2.58139	2.49917	2.47584	2.48603	2.33748	2.37129	2.43659	2.51823	2.50363	2.58846
CG9894	0.0583798	0.00132576	24	12	0.0742605	8.21194	8.22495	8.2084	8.30283	8.29391	8.31622	8.3699	8.42183	8.3177	8.26228	8.15603	8.28733
pygo	0.0583798	0.00132576	24	6	0.0738362	3.18622	3.22233	3.18397	3.25375	3.23658	3.23583	3.09269	3.17529	3.11575	2.9783	3.10688	3.15583
CG30392	0.0583798	0.00132576	18	3	0.0700365	4.63027	4.56213	4.66679	4.52009	4.52929	4.61816	4.47863	4.41382	4.53122	4.67652	4.67592	4.67611
CG10495	0.0583798	0.00132576	18	3	0.0676765	2.52766	2.49994	2.47148	2.44725	2.45711	2.53763	2.34265	2.41598	2.37577	2.60485	2.55563	2.59324
G-ialpha65A	0.0583798	0.00132576	24	15	0.0670888	4.76091	4.83792	4.82888	4.89134	4.91273	4.86863	4.98697	5.00248	4.96165	4.93916	4.88307	4.91045
CG16812	0.0583798	0.00132576	18	6	0.0641713	4.33587	4.37973	4.4089	4.42582	4.44242	4.44965	4.3418	4.33507	4.236	4.43368	4.41161	4.43486
CG9641	0.0583798	0.00132576	18	3	0.0627688	3.29707	3.35613	3.31906	3.28762	3.21649	3.19885	3.10786	3.2725	3.14847	3.3773	3.35466	3.4282
ttk	0.0583798	0.00132576	24	6	0.061831	4.25829	4.24908	4.2132	4.21647	4.26756	4.24972	4.16596	4.19904	4.17385	4.07761	4.11776	4.16196
Mcr	0.0583798	0.00132576	24	15	0.0615154	3.994	4.03689	3.97488	4.00813	4.08198	4.04766	4.10387	4.12175	4.13474	4.09189	4.10985	4.11722
CG8312	0.0583798	0.00132576	18	12	0.0605358	4.52361	4.63637	4.6184	4.6464	4.64484	4.60259	4.75281	4.73045	4.65069	4.4993	4.50181	4.56684
Gyk	0.0583798	0.00132576	24	18	0.0603205	6.09801	6.1111	6.01781	6.08688	5.96955	6.0509	6.13021	6.10452	6.13222	6.23422	6.17077	6.1369
MED28	0.0583798	0.00132576	24	18	0.0599027	4.02077	4.07246	4.02597	3.99657	4.02634	3.9866	4.07891	4.07695	4.03798	4.17022	4.15756	4.12133
Toll-7	0.0583798	0.00132576	24	3	0.0588683	2.13676	2.13955	2.12109	2.12932	2.08448	2.0996	1.98181	1.89399	2.00644	2.07244	2.07221	2.10211
MRE23	0.0583798	0.00132576	18	15	0.0588329	1.49928	1.42459	1.47245	1.41294	1.38925	1.42269	1.51539	1.53863	1.50385	1.42031	1.44697	1.45411
CG31908	0.0583798	0.00132576	24	6	0.058479	4.93496	4.96903	4.95392	4.99184	5.04251	5.00372	4.96746	4.88944	4.91295	4.86245	4.86854	4.90452
Nbr	0.0583798	0.00132576	18	3	0.0579611	4.15424	4.13951	4.07368	4.12086	4.12349	4.10472	4.01909	4.04842	4.03294	4.25791	4.17486	4.22098
JIL-1	0.0583798	0.00132576	24	15	0.0562565	3.46734	3.41517	3.43905	3.50476	3.48141	3.48644	3.60961	3.56135	3.54267	3.51823	3.5015	3.56337
Eaat1	0.0583798	0.00132576	18	3	0.0560026	7.38261	7.32945	7.37854	7.22365	7.36592	7.28246	7.18933	7.30999	7.20326	7.50133	7.40657	7.38815
Gef64C	0.0583798	0.00132576	24	15	0.0539247	1.52844	1.51803	1.52083	1.52985	1.5574	1.53639	1.56865	1.61896	1.65857	1.59887	1.6125	1.59238
CG8298	0.0583798	0.00132576	18	3	0.0526459	3.09664	3.15849	3.10052	3.07025	3.08464	3.1102	2.99581	3.02219	3.02409	3.18062	3.11934	3.16038
CG5451	0.0583798	0.00132576	18	3	0.0521627	3.32027	3.32372	3.31721	3.25583	3.29922	3.32518	3.16621	3.13606	3.25141	3.41052	3.41341	3.42716
Rep	0.0583798	0.00132576	18	3	0.0517654	3.32122	3.32061	3.37447	3.30041	3.30126	3.34643	3.24242	3.08592	3.2752	3.37166	3.41263	3.40339
Cad99C	0.0583798	0.00132576	24	9	0.0512443	2.71903	2.77211	2.76645	2.79099	2.85311	2.81885	2.78362	2.7854	2.83383	2.692	2.74586	2.7154
CG5522	0.0583798	0.00132576	18	3	0.0498561	4.04945	4.09682	4.08432	4.022	4.08396	4.07366	3.93789	4.02453	4.00059	4.1182	4.10468	4.10148
CG3792	0.0583798	0.00132576	18	3	0.0497269	4.91259	4.87711	4.84964	4.86322	4.89288	4.84286	4.7953	4.79289	4.78628	4.94232	4.94684	4.94163
snama	0.0583798	0.00132576	18	6	0.0490456	3.59569	3.63626	3.62852	3.65623	3.69788	3.69781	3.57905	3.59351	3.5879	3.63067	3.59591	3.65039
CG6388	0.0583798	0.00132576	18	3	0.0485763	3.68855	3.72615	3.66399	3.68489	3.63946	3.59259	3.55161	3.63905	3.59529	3.73312	3.73951	3.80629
CG14322	0.0583798	0.00132576	24	3	0.0478919	3.19336	3.16425	3.19699	3.18651	3.15334	3.13935	3.07733	3.12903	3.07642	3.13047	3.11072	3.09256
Ca-beta	0.0583798	0.00132576	18	12	0.0452347	3.83238	3.80131	3.80957	3.8465	3.75868	3.83735	3.87354	3.88127	3.87937	3.61835	3.68471	3.74619
endos	0.0583798	0.00132576	24	21	0.0426957	5.39757	5.39585	5.40202	5.35874	5.38563	5.372	5.38656	5.34528	5.3898	5.60687	5.47472	5.48315
CG8891	0.0583798	0.00132576	18	3	0.0414229	4.65716	4.73309	4.65659	4.65028	4.51577	4.62708	4.57556	4.62665	4.49247	4.77433	4.67323	4.77821
Spt5	0.0583798	0.00132576	18	3	0.0376515	4.81129	4.89325	4.86258	4.8332	4.86069	4.83143	4.79211	4.76539	4.80933	4.89977	4.914	4.95834
Ptp99A	0.0583798	0.00132576	24	3	0.0376453	3.62464	3.64178	3.66232	3.61749	3.61828	3.63834	3.56428	3.55634	3.60186	3.58172	3.57768	3.61607
CG12134	0.0583798	0.00132576	18	3	0.0375433	2.91034	2.87866	2.87622	2.86539	2.82878	2.79447	2.84187	2.82063	2.70336	2.96114	2.93634	3.0788
sd	0.0583798	0.00132576	24	9	0.0370839	4.00666	4.00877	4.04045	4.09801	4.07001	4.10915	4.01995	4.03796	4.0093	3.97734	3.98812	4.00452
CG34349	0.0583798	0.00132576	18	12	0.0363475	4.65613	4.60773	4.67107	4.69505	4.66482	4.70129	4.70567	4.75033	4.72671	4.63278	4.64816	4.60112
Cyp6v1	0.0583798	0.00132576	18	12	0.036184	3.91666	3.9233	3.93027	3.97031	3.98086	3.94517	3.98598	4.02856	3.98144	3.78675	3.81042	3.93935
CG15141	0.0583798	0.00132576	18	3	0.0357514	2.94413	2.91867	2.92288	2.91192	2.92102	2.87232	2.78576	2.817	2.91168	2.97463	2.94351	2.97294
CG11138	0.0583798	0.00132576	18	12	0.033733	3.33819	3.311	3.34083	3.37117	3.3874	3.42618	3.47389	3.40746	3.37293	3.23717	3.21391	3.30797
Nup160	0.0583798	0.00132576	18	3	0.0330462	2.67109	2.70418	2.67619	2.65923	2.65282	2.66244	2.62656	2.60089	2.62552	2.67308	2.69676	2.77969
CG33172	0.0583798	0.00132576	18	3	0.0303435	1.83829	1.82724	1.83148	1.77218	1.80464	1.8261	1.76351	1.78251	1.79526	1.83491	1.86809	1.87993
sdt	0.0583798	0.00132576	18	12	0.0276956	3.61583	3.58844	3.57787	3.64224	3.61508	3.64881	3.65819	3.62761	3.71882	3.38136	3.4711	3.55465
CG2528	0.0583798	0.00132576	24	18	0.0156044	1.03065	1.03281	1.04007	1.03549	1.01107	1.02629	1.042	1.04426	1.0355	1.09335	1.05681	1.07444
CG32686	0.0583798	0.00132576	18	15	0.011032	1.01317	1.0197	1.01877	1	1.00332	1.00317	1.01898	1.10365	1.01527	1.00789	1.0064	1.01024
Jon25Bii	0.0798893	0.00310606	24	12	0.514442	1.5733	1.33495	1.24448	1.83836	1.38548	1.90877	2.53334	2.49595	2.87428	1.35134	1.34158	1.58425
Dr	0.0798893	0.00310606	18	3	0.41853	2.7143	2.75849	2.63492	2.44053	2.44463	2.69866	1.99876	2.00833	2.09113	2.72674	2.70924	2.85512
CG16758	0.0798893	0.00310606	24	3	0.392641	9.23018	9.25482	9.3331	9.05841	8.99913	9.06784	8.58298	8.45587	8.75623	8.32529	8.62948	8.77481
TotA	0.0798893	0.00310606	24	6	0.388965	8.77665	8.90078	8.90503	9.14731	9.19345	9.81427	8.65711	9.02888	8.43029	8.53749	8.21283	8.30333
CG11241	0.0798893	0.00310606	24	15	0.366482	4.32379	4.46992	4.43913	4.52728	4.41418	4.40697	5.03211	4.94896	5.08776	4.83618	4.92636	4.92414
CG15530	0.0798893	0.00310606	24	3	0.35699	2.70519	2.96756	2.64218	2.58714	2.37059	2.68662	2.01649	2.12107	2.06439	2.13655	2.68427	2.3569
Men	0.0798893	0.00310606	18	15	0.29866	8.80021	8.47272	8.66408	8.23796	8.35731	8.30854	8.91207	8.66033	8.89855	8.27535	8.43201	8.35768
CG5059	0.0798893	0.00310606	24	15	0.296919	6.46295	6.40901	6.33221	6.416	6.43857	6.48616	6.91966	6.82647	6.86981	6.86158	6.71681	6.83522
Gp93	0.0798893	0.00310606	24	3	0.293723	6.91545	6.93801	6.85232	6.94857	6.79208	6.91021	6.37492	6.47002	6.35077	6.51402	6.5668	6.61847
CG1887	0.0798893	0.00310606	24	3	0.290271	5.55935	5.52981	5.67052	5.44645	5.64407	5.57503	4.86772	4.90407	5.01333	5.3741	5.38035	5.33954
CG34166	0.0798893	0.00310606	24	15	0.284291	9.06572	8.79055	8.66415	9.14142	8.96986	8.9394	9.51352	9.30062	9.54458	9.31768	9.18322	9.3391
CG31777	0.0798893	0.00310606	24	3	0.278941	6.2555	6.07252	6.07184	5.91056	5.92147	5.9197	5.40169	5.67787	5.6059	5.82378	5.59543	5.57976
CG13607	0.0798893	0.00310606	24	15	0.274333	5.83284	5.80642	5.79868	5.76418	5.93335	5.85906	6.37677	6.30391	6.21025	6.0607	6.22342	6.11062
smp-30	0.0798893	0.00310606	18	12	0.258907	8.03894	7.87047	8.13103	8.32793	7.98988	8.06705	8.57948	8.28633	8.56962	7.6956	7.64882	7.50001
Irp-1B	0.0798893	0.00310606	24	15	0.253352	6.08043	5.83764	5.75563	5.963	5.86546	5.92917	6.39451	6.26264	6.42624	6.11383	6.15131	6.27862
CG3344	0.0798893	0.00310606	18	3	0.252025	5.19547	5.13347	5.13849	4.74585	4.37541	4.73113	4.57874	4.61787	4.45184	5.19169	5.51992	5.50773
CG6145	0.0798893	0.00310606	18	15	0.247795	5.0556	5.18303	4.99664	4.98538	4.91882	4.84761	5.83135	5.70343	5.61769	5.01359	5.13828	5.02968
CG11796	0.0798893	0.00310606	24	6	0.244535	8.60086	8.23912	8.34628	8.57922	8.63209	8.48452	8.21393	8.42861	8.22257	8.15967	7.84816	7.90529
CG34165	0.0798893	0.00310606	18	12	0.239493	2.22654	2.51755	1.96004	2.3022	2.23895	2.13512	2.55535	2.57467	2.57765	1.5668	1.76403	1.55948
LysD	0.0798893	0.00310606	24	3	0.230649	8.84109	8.82529	9.09071	8.98562	8.78705	9.0444	8.5562	8.1593	8.48812	8.73728	8.78616	8.64052
Cyp18a1	0.0798893	0.00310606	24	21	0.228693	3.08049	3.11871	3.05058	2.83924	2.97975	2.79456	3.10137	2.87765	2.95792	3.40681	3.36575	3.43309
CG13639	0.0798893	0.00310606	24	21	0.227938	1.98783	1.98069	2.16752	1.85304	1.7746	1.82209	1.96374	2.16604	2.06274	2.58743	2.29397	2.55974
pre-mod(mdg4)-U	0.0798893	0.00310606	24	3	0.22133	3.37588	3.24065	3.50246	3.09133	3.22634	3.40641	2.9881	2.58926	2.96044	3.032	3.00539	3.22896
CG13082	0.0798893	0.00310606	24	15	0.212102	3.85009	3.94823	3.93586	3.91139	4.0849	3.93479	4.32291	4.39128	4.25152	4.20602	4.13993	4.11502
Odc1	0.0798893	0.00310606	24	18	0.211264	4.59776	4.63165	4.28983	4.51423	4.48474	4.62283	4.67567	4.67809	4.79234	4.85782	5.13494	4.9632
Keap1	0.0798893	0.00310606	18	12	0.206911	3.05352	3.00667	3.02745	3.07345	3.06185	3.03811	3.42801	3.32007	3.38367	2.91318	3.04261	3.0065
ana	0.0798893	0.00310606	24	18	0.206386	2.28292	2.42222	2.49109	2.4363	2.3651	2.39253	2.68226	2.58177	2.6149	2.79318	2.76019	2.6888
alpha-Est10	0.0798893	0.00310606	24	15	0.20486	4.37079	4.13839	4.23835	4.28515	4.30861	4.20648	4.64911	4.69672	4.61612	4.48963	4.39189	4.45986
desat1	0.0798893	0.00310606	24	18	0.190847	10.3553	10.0925	10.1352	9.77929	9.93182	9.8694	10.2585	10.2784	10.3022	10.3261	10.3727	10.3743
CG1208	0.0798893	0.00310606	18	15	0.189705	4.74538	4.76914	4.64258	4.69328	4.25734	4.44013	4.96157	4.80947	4.91682	4.61879	4.73027	4.6365
CG32425	0.0798893	0.00310606	18	15	0.182803	4.8763	4.9378	5.02363	4.76511	4.68048	4.82099	5.14561	5.08827	5.08861	4.68182	4.85867	4.68567
Clk	0.0798893	0.00310606	24	9	0.182185	3.49756	3.49504	3.49311	3.5223	3.68602	3.62946	3.63747	3.55397	3.61227	3.0196	3.03779	3.07282
CG9747	0.0798893	0.00310606	18	15	0.178105	3.16769	3.02626	3.06892	2.83501	2.81773	2.93813	3.22665	3.0895	3.34138	3.01263	3.10682	2.96865
Vago	0.0798893	0.00310606	24	21	0.173913	5.56585	5.5762	5.73183	5.12087	5.19327	5.38873	5.30064	5.53587	5.42138	5.60645	5.58886	5.60696
CG15745	0.0798893	0.00310606	18	15	0.171815	4.29246	4.27587	4.24468	4.05131	4.10105	4.16062	4.81138	4.79296	4.77847	4.02295	4.22415	4.13404
CG9098	0.0798893	0.00310606	18	6	0.169317	2.10198	1.98819	2.00769	2.24526	2.27964	2.27837	2.03844	1.95446	2.03892	2.10715	2.19425	2.16876
CG13796	0.0798893	0.00310606	24	15	0.164138	3.38733	3.3851	3.36626	3.76143	3.72249	3.68792	3.81684	3.82355	3.95232	3.7503	3.78522	3.57423
CG13056	0.0798893	0.00310606	24	3	0.16218	4.84571	4.95215	4.92553	4.8166	4.80663	4.75823	4.4261	4.40174	4.57565	4.90387	4.63672	4.74312
CG33296	0.0798893	0.00310606	24	18	0.161609	3.67495	3.61981	3.75453	3.51014	3.37327	3.40572	3.74001	3.78884	3.55749	3.98673	3.87284	3.79277
Msr-110	0.0798893	0.00310606	24	12	0.161339	8.80524	8.88251	8.79174	9.00558	9.19704	9.026	9.11716	9.2428	9.04794	9.02619	8.90069	8.88335
CG9331	0.0798893	0.00310606	18	12	0.154534	7.20579	7.02882	7.08196	7.17668	7.13109	7.08661	7.46495	7.27991	7.45523	7.00592	7.07069	7.00855
Reg-2	0.0798893	0.00310606	24	12	0.149131	6.47439	6.47621	6.48125	6.75305	6.69223	6.61283	6.77535	6.56057	6.76366	6.49102	6.57011	6.48317
CG13868	0.0798893	0.00310606	18	15	0.148125	7.37671	7.37247	7.39126	7.31241	7.14614	7.18576	7.59038	7.45145	7.52189	7.11965	7.31676	7.3055
CG11594	0.0798893	0.00310606	24	15	0.143806	6.00355	5.9462	5.9096	5.9998	5.98998	5.92054	6.29262	6.24391	6.28206	6.11166	6.03126	6.09868
HmgD	0.0798893	0.00310606	24	15	0.142176	4.61154	4.72622	4.60391	4.75882	4.81126	4.78521	4.88891	5.01389	4.90223	4.98727	4.81706	4.90706
CG4004	0.0798893	0.00310606	24	15	0.139546	2.48815	2.51581	2.42523	2.42779	2.4912	2.50867	2.68078	2.74024	2.72505	2.66021	2.62985	2.55075
DAT	0.0798893	0.00310606	18	3	0.139437	2.82908	2.85131	2.94161	2.74165	2.78978	2.65684	2.52609	2.65411	2.57834	2.85213	2.88321	2.83341
CG14523	0.0798893	0.00310606	24	21	0.131985	3.77801	3.78025	3.92568	3.72018	3.60779	3.59247	3.70981	3.87906	3.7337	4.07766	3.88315	3.92991
CG3534	0.0798893	0.00310606	24	15	0.130963	4.89618	4.77687	4.86238	4.84228	5.02529	4.89935	5.1482	5.11611	5.20024	5.0468	4.94695	4.94589
Rrp42	0.0798893	0.00310606	18	3	0.13042	3.04169	3.10929	3.10842	3.03808	2.91024	3.10729	2.78772	2.85812	2.90438	3.15389	3.06796	3.13838
foxo	0.0798893	0.00310606	24	15	0.129537	5.04835	5.03483	5.02518	5.13758	5.13482	5.16788	5.42418	5.38751	5.40019	5.2289	5.09515	5.16334
CG6685	0.0798893	0.00310606	24	3	0.128375	2.68398	2.59499	2.62173	2.54634	2.62744	2.6642	2.38124	2.34795	2.42991	2.53753	2.44466	2.51173
SPE	0.0798893	0.00310606	24	12	0.126337	7.18458	7.13345	7.18364	7.36019	7.5019	7.52065	7.53454	7.55687	7.51385	7.49572	7.39682	7.43054
sas	0.0798893	0.00310606	24	6	0.123937	3.55906	3.62373	3.6404	3.61571	3.78898	3.68685	3.50759	3.59204	3.46636	3.46851	3.42088	3.40717
rgn	0.0798893	0.00310606	24	6	0.122749	5.07047	4.97304	4.90523	4.99116	5.18916	5.1217	4.87979	4.97634	4.97288	4.71871	4.84983	4.82428
nimC1	0.0798893	0.00310606	24	18	0.122593	4.76047	4.86446	4.85545	4.66801	4.721	4.805	4.8998	4.92842	4.87148	5.10057	4.86768	5.21485
Dat	0.0798893	0.00310606	24	15	0.120174	7.00263	6.97974	6.9947	7.12833	7.11927	7.13162	7.17177	7.2637	7.28607	7.372	7.20197	7.13348
CG14100	0.0798893	0.00310606	24	21	0.119712	3.53216	3.58673	3.64926	3.48943	3.44342	3.37938	3.42178	3.55037	3.51078	3.70644	3.72018	3.63996
CG31751	0.0798893	0.00310606	24	18	0.1197	5.38294	5.27646	5.39991	5.31944	5.39774	5.36046	5.44624	5.41957	5.53157	5.69085	5.55172	5.58551
CG33080	0.0798893	0.00310606	24	15	0.116444	4.95946	4.9608	4.96666	5.152	5.18091	5.10922	5.34078	5.20422	5.22199	5.14196	5.21183	5.22045
metl	0.0798893	0.00310606	18	6	0.116107	3.83433	3.83147	3.90181	3.99853	4.0292	4.02797	3.84517	3.87275	3.80366	3.99527	3.91777	3.97265
regucalcin	0.0798893	0.00310606	24	18	0.115765	8.35776	8.48531	8.50099	8.44375	8.42927	8.47566	8.60925	8.62215	8.58186	8.79747	8.61054	8.6363
Sdc	0.0798893	0.00310606	24	9	0.115502	5.94767	5.8675	5.92115	6.01149	6.03255	6.01099	6.02276	6.00671	6.02914	5.82705	5.77431	5.80383
CG10077	0.0798893	0.00310606	24	6	0.111158	7.52744	7.52225	7.52659	7.53924	7.58031	7.58408	7.35999	7.42354	7.4123	7.31002	7.38159	7.51649
CG15717	0.0798893	0.00310606	18	15	0.110054	5.1116	5.13284	5.18294	5.06577	5.02062	5.04913	5.32942	5.19468	5.32908	5.03936	5.08874	5.15929
Cnx99A	0.0798893	0.00310606	24	3	0.107186	6.14193	6.09537	6.12669	6.10309	6.08792	6.12231	5.88498	5.90033	5.99665	5.93894	5.97725	6.04163
ken	0.0798893	0.00310606	18	12	0.107074	3.28338	3.36482	3.36389	3.35646	3.47673	3.4477	3.60446	3.5612	3.50788	3.26757	3.34301	3.29829
CG3448	0.0798893	0.00310606	24	9	0.106485	3.87996	4.02768	4.01379	4.02873	4.10221	4.18153	4.08093	4.04655	4.02454	3.8293	3.87905	3.92942
CG6453	0.0798893	0.00310606	24	3	0.106081	4.80995	4.77019	4.77079	4.77247	4.80724	4.76291	4.57098	4.62062	4.51481	4.67194	4.6653	4.65345
CG7872	0.0798893	0.00310606	18	6	0.105824	4.62309	4.64545	4.69532	4.74625	4.79484	4.82051	4.63112	4.54801	4.56563	4.74564	4.74772	4.79947
l(3)72Dn	0.0798893	0.00310606	18	6	0.103042	2.36639	2.30596	2.43393	2.46823	2.4956	2.44349	2.27303	2.32024	2.24429	2.45301	2.4325	2.45671
obst-A	0.0798893	0.00310606	18	12	0.100765	3.57354	3.50893	3.61916	3.65604	3.73407	3.62027	3.76278	3.73646	3.76696	3.56651	3.60861	3.57183
Ent1	0.0798893	0.00310606	24	21	0.100003	4.74305	4.64162	4.63419	4.61712	4.61473	4.61424	4.70566	4.63056	4.6864	4.98571	4.93612	4.92198
CG9932	0.0798893	0.00310606	18	12	0.0998043	5.13097	5.07319	5.08978	5.17186	5.19802	5.1969	5.3398	5.313	5.26365	5.01653	5.06444	5.17629
Pbp45	0.0798893	0.00310606	18	3	0.0997895	1.96317	1.85638	1.95049	1.85115	1.76664	1.82136	1.7099	1.71526	1.71563	1.90813	1.91193	1.96754
Su(z)2	0.0798893	0.00310606	18	6	0.0979131	2.77708	2.80729	2.76562	2.8632	2.80489	2.89856	2.6114	2.60958	2.66193	2.79008	2.78193	2.81786
Mapmodulin	0.0798893	0.00310606	24	15	0.0977706	5.31227	5.2986	5.2805	5.42003	5.35199	5.33926	5.45736	5.49809	5.49283	5.5024	5.4264	5.4162
Mkp3	0.0798893	0.00310606	18	12	0.0970023	3.31211	3.39536	3.33737	3.44214	3.43306	3.43883	3.51358	3.60969	3.57024	3.29677	3.34388	3.34088
slbo	0.0798893	0.00310606	24	3	0.0952879	2.69963	2.7679	2.79895	2.75829	2.7612	2.77894	2.59626	2.60311	2.5638	2.66691	2.69536	2.64179
gatA	0.0798893	0.00310606	18	3	0.0936899	3.84239	3.96224	3.94798	3.88306	3.88889	3.81697	3.77643	3.75056	3.73445	4.03142	3.93866	3.98718
Eip63F-2	0.0798893	0.00310606	24	6	0.0936006	1.70747	1.62627	1.66909	1.68295	1.66825	1.7431	1.60921	1.55983	1.65635	1.46957	1.50661	1.49542
Ero1L	0.0798893	0.00310606	24	3	0.0920788	5.05598	4.99874	5.02113	5.00354	5.01773	5.03545	4.87239	4.80289	4.85519	4.89704	4.93235	4.97769
CG12581	0.0798893	0.00310606	18	6	0.0919582	4.55762	4.59088	4.63447	4.68767	4.77198	4.70109	4.53306	4.61911	4.5553	4.6347	4.65899	4.59957
CG12241	0.0798893	0.00310606	18	3	0.0914532	3.39967	3.45584	3.45731	3.3648	3.3923	3.38034	3.2234	3.23547	3.27363	3.43274	3.44181	3.49945
pyx	0.0798893	0.00310606	18	6	0.0903913	2.66523	2.65595	2.66367	2.76698	2.86315	2.79389	2.61224	2.65793	2.67737	2.6816	2.75476	2.7458
CG17834	0.0798893	0.00310606	24	15	0.0901874	3.58063	3.60727	3.51715	3.7016	3.64322	3.59885	3.78558	3.87868	3.74694	3.69863	3.68131	3.66225
Drip	0.0798893	0.00310606	24	15	0.0896643	5.59148	5.51579	5.59531	5.69338	5.65157	5.66716	5.67953	5.76832	5.78821	5.74787	5.74653	5.75752
obst-B	0.0798893	0.00310606	18	12	0.0884605	2.1315	2.18215	2.07695	2.2417	2.3147	2.0803	2.25675	2.36181	2.29407	2.01828	1.91824	1.94729
CG4511	0.0798893	0.00310606	18	3	0.0877109	4.1372	4.03818	4.06785	4.02778	4.096	4.0138	3.94782	3.85881	3.91413	4.11203	4.11391	4.15088
CG3246	0.0798893	0.00310606	24	18	0.0866489	6.46256	6.44176	6.43413	6.35152	6.36825	6.39672	6.57199	6.41572	6.46981	6.50643	6.61757	6.6192
CG34406	0.0798893	0.00310606	18	6	0.0865911	1.83326	1.86437	1.84343	1.91673	1.95756	1.92278	1.69912	1.72097	1.86358	1.93422	1.90366	1.9029
CG31342	0.0798893	0.00310606	18	6	0.0862146	3.76958	3.8314	3.82239	3.89151	3.89108	3.88639	3.6914	3.71487	3.71827	3.81541	3.82201	3.83208
CG4953	0.0798893	0.00310606	18	3	0.084955	3.54032	3.47134	3.53321	3.48655	3.52416	3.5267	3.40656	3.39078	3.3957	3.6389	3.53834	3.59538
miple2	0.0798893	0.00310606	24	0	0.0844911	4.27052	4.26358	4.17914	4.19909	4.16601	4.13905	4.04673	4.02175	3.95112	4.25809	4.17422	4.16732
CG13907	0.0798893	0.00310606	18	12	0.0840601	4.96171	4.99078	4.94804	5.10986	5.044	5.02005	5.20513	5.21378	5.05086	4.90397	4.99096	4.93964
MRP	0.0798893	0.00310606	18	12	0.083251	5.56024	5.46097	5.46009	5.63277	5.61518	5.58457	5.71367	5.61122	5.70286	5.18546	5.43305	5.46103
CG6745	0.0798893	0.00310606	24	0	0.0829251	2.44114	2.38339	2.4282	2.38639	2.31334	2.34061	2.25921	2.21806	2.23393	2.35757	2.40215	2.41757
Ssdp	0.0798893	0.00310606	24	9	0.0827327	4.16793	4.1543	4.07408	4.24269	4.18962	4.25327	4.24329	4.21651	4.1802	4.10686	4.01766	4.07116
Pde11	0.0798893	0.00310606	24	15	0.0821399	4.50801	4.48221	4.49394	4.62332	4.50053	4.59304	4.75825	4.65876	4.66665	4.55634	4.59828	4.62447
ClC-c	0.0798893	0.00310606	24	18	0.0818836	4.92549	4.91534	4.86616	4.86037	4.89571	4.88496	5.0019	4.95493	5.01119	4.99952	5.03607	5.03694
CR43883	0.0798893	0.00310606	24	18	0.0818169	1.33074	1.4897	1.42005	1.32082	1.2163	1.32624	1.42586	1.41391	1.43545	1.53432	1.58046	1.51491
RhoGAP5A	0.0798893	0.00310606	18	6	0.0817304	3.19971	3.26057	3.18314	3.3384	3.3809	3.23358	3.13493	3.17308	3.11937	3.29077	3.333	3.33462
Ncoa6	0.0798893	0.00310606	24	6	0.0814562	3.18087	3.13675	3.1483	3.17032	3.1929	3.2233	3.10877	3.04414	3.10063	2.88279	2.99999	3.12143
LamC	0.0798893	0.00310606	18	12	0.0810325	5.12087	5.2134	5.12051	5.27116	5.28454	5.26169	5.32441	5.328	5.32356	5.04464	5.19065	5.16536
sec13	0.0798893	0.00310606	18	6	0.0799031	5.70469	5.72868	5.69294	5.83419	5.81153	5.80971	5.68917	5.75208	5.66648	5.76979	5.74959	5.77386
sima	0.0798893	0.00310606	18	12	0.0797839	5.24191	5.14909	5.15798	5.16033	5.19738	5.19157	5.41168	5.23893	5.3743	4.95384	5.08251	5.13518
CG10680	0.0798893	0.00310606	24	3	0.0790224	8.80192	8.72604	8.8518	8.70234	8.78617	8.74463	8.62478	8.60969	8.67965	8.70133	8.64072	8.66694
CG10165	0.0798893	0.00310606	24	0	0.0770475	4.13826	4.06776	4.08037	3.97036	3.97694	4.03086	3.99643	3.91737	3.89887	4.05979	4.10433	4.03721
gammaTub23C	0.0798893	0.00310606	24	21	0.0770116	4.18379	4.2161	4.13725	4.07419	4.13922	4.0979	4.10832	4.1402	4.10234	4.23412	4.23494	4.27908
Rab9	0.0798893	0.00310606	24	12	0.0769249	5.27238	5.27956	5.33798	5.36784	5.45189	5.36097	5.5485	5.47174	5.46087	5.36542	5.33634	5.39306
Sgf29	0.0798893	0.00310606	18	3	0.0713346	3.26088	3.23636	3.17056	3.15893	3.15785	3.18828	3.04352	3.07571	3.13664	3.34276	3.18936	3.25866
CG7830	0.0798893	0.00310606	18	6	0.0713314	5.68485	5.62349	5.65209	5.72729	5.72953	5.69901	5.60123	5.58397	5.58004	5.66946	5.71896	5.65036
CG4785	0.0798893	0.00310606	18	3	0.0700374	2.58598	2.60415	2.62096	2.47256	2.51388	2.52191	2.4427	2.41793	2.47615	2.66081	2.56697	2.71791
Pdcd4	0.0798893	0.00310606	24	9	0.0694816	5.6239	5.66937	5.57393	5.76943	5.78275	5.69324	5.7194	5.67866	5.67506	5.62335	5.61257	5.62129
z	0.0798893	0.00310606	18	6	0.0687679	3.57725	3.6279	3.63281	3.63927	3.72516	3.71892	3.49726	3.50635	3.57073	3.69315	3.64458	3.61703
CG12301	0.0798893	0.00310606	24	3	0.0685057	2.59421	2.54455	2.53989	2.50287	2.47952	2.55745	2.46015	2.41174	2.36503	2.45286	2.44343	2.46697
Rad9	0.0798893	0.00310606	24	3	0.0681244	2.08952	2.07134	2.04549	2.05379	1.97515	2.0047	1.93556	1.92077	1.94627	1.97613	1.9452	1.9797
Pcl	0.0798893	0.00310606	18	6	0.0676294	2.67223	2.70175	2.72701	2.73638	2.82506	2.82006	2.64074	2.64637	2.68124	2.74148	2.74046	2.75155
DNaseII	0.0798893	0.00310606	18	3	0.0670781	7.26112	7.2287	7.30796	7.25638	7.24041	7.26935	7.16626	7.08657	7.15778	7.48448	7.31491	7.3207
Liprin-beta	0.0798893	0.00310606	18	6	0.0668391	5.23738	5.21805	5.3007	5.31248	5.36923	5.2992	5.21795	5.18494	5.15928	5.31151	5.28562	5.26021
Mer	0.0798893	0.00310606	18	6	0.066772	5.14189	5.18907	5.21595	5.24871	5.25557	5.22223	5.12708	5.13531	5.13948	5.15954	5.22322	5.24362
CG13285	0.0798893	0.00310606	18	12	0.0651725	4.84151	4.82264	4.66171	4.80856	4.91255	4.93754	4.85587	4.98464	4.99035	4.50706	4.51875	4.51552
ana1	0.0798893	0.00310606	24	0	0.0648511	2.58022	2.57262	2.53202	2.48272	2.51795	2.46719	2.46777	2.37734	2.39819	2.53279	2.48653	2.55992
CG15317	0.0798893	0.00310606	18	3	0.0645367	3.06609	3.06648	3.08813	2.97544	3.09829	3.01902	2.8555	2.97482	2.98	3.23944	3.16347	3.15144
Zfrp8	0.0798893	0.00310606	18	3	0.0645171	3.77524	3.83376	3.80563	3.89458	3.73414	3.76954	3.71439	3.72085	3.67522	3.89947	3.89554	3.8876
CG14749	0.0798893	0.00310606	18	3	0.0643447	3.36626	3.40872	3.36313	3.38343	3.35867	3.33658	3.25839	3.30017	3.24559	3.42636	3.44392	3.37546
RagA	0.0798893	0.00310606	24	18	0.0643353	4.87482	4.83762	4.82693	4.79526	4.84434	4.85616	4.92882	4.88477	4.90453	4.95719	4.94693	4.97199
MYPT-75D	0.0798893	0.00310606	18	12	0.0642151	3.74481	3.76538	3.78166	3.85619	3.76151	3.84225	3.91893	3.84613	3.88631	3.64685	3.74411	3.74873
CG32452	0.0798893	0.00310606	18	3	0.0635664	2.53238	2.60684	2.56169	2.45906	2.54896	2.50967	2.41808	2.44125	2.47504	2.62155	2.5579	2.63608
Fer2LCH	0.0798893	0.00310606	18	3	0.0632406	9.25046	9.25595	9.14943	9.18064	9.21881	9.23457	9.12938	9.09737	9.16007	9.31132	9.34899	9.32655
abo	0.0798893	0.00310606	18	3	0.0631674	3.14647	3.01034	3.14167	3.06117	3.10887	3.08383	3.04105	2.958	2.9945	3.17009	3.1842	3.22891
CG9911	0.0798893	0.00310606	18	3	0.0623026	5.88969	5.8379	5.87706	5.88308	5.86784	5.87422	5.7433	5.79539	5.74548	5.94952	5.91372	5.90197
Elp3	0.0798893	0.00310606	18	3	0.0608039	3.83422	3.88522	3.86212	3.77104	3.85041	3.85703	3.80842	3.70676	3.69905	3.8763	3.91782	3.99109
alt	0.0798893	0.00310606	24	9	0.0602629	5.01886	5.0471	5.03016	5.04106	5.1131	5.12089	5.0814	5.09813	5.06907	4.97449	4.95574	4.99325
CG15863	0.0798893	0.00310606	18	0	0.0594854	3.59864	3.50778	3.54563	3.47867	3.39964	3.4615	3.42023	3.49626	3.48301	3.59418	3.50649	3.50488
sqz	0.0798893	0.00310606	24	12	0.0580861	2.12351	2.14248	2.09116	2.20115	2.2182	2.17734	2.23218	2.21141	2.25703	2.19961	2.13504	2.13485
deltaCOP	0.0798893	0.00310606	18	6	0.0578928	5.93751	5.93689	5.93558	5.97106	5.9902	5.99758	5.85423	5.83095	5.85214	5.9109	5.95985	5.98205
cav	0.0798893	0.00310606	24	3	0.0578172	2.1231	2.1424	2.09268	2.03061	2.08771	2.02425	1.9346	1.97489	1.9513	2.07913	2.01375	2.05245
klar	0.0798893	0.00310606	24	9	0.057542	4.2561	4.26139	4.24538	4.29499	4.30833	4.32399	4.29232	4.32566	4.30293	4.14941	4.16454	4.21057
CG10616	0.0798893	0.00310606	18	3	0.0573465	4.16732	4.09386	4.14596	4.11195	4.12532	4.1553	3.99187	4.06486	4.047	4.21643	4.17007	4.18969
CG5287	0.0798893	0.00310606	18	3	0.056537	4.30032	4.32718	4.29045	4.24343	4.28972	4.26829	4.16347	4.05061	4.23	4.27007	4.34803	4.35376
CG8207	0.0798893	0.00310606	18	3	0.0556456	3.8143	3.77729	3.86208	3.78999	3.79175	3.8035	3.72222	3.7356	3.65238	3.85977	3.90614	3.96231
CG42327	0.0798893	0.00310606	24	12	0.0554156	4.32528	4.31332	4.28666	4.39048	4.33294	4.35713	4.48062	4.46509	4.41398	4.31091	4.34554	4.33974
CG13707	0.0798893	0.00310606	24	15	0.0547635	2.53204	2.52903	2.52099	2.55911	2.57305	2.59273	2.68085	2.66876	2.72493	2.59841	2.54486	2.58026
CG7149	0.0798893	0.00310606	18	12	0.0532546	3.82737	3.91995	3.93586	3.98847	3.92907	3.99142	4.09021	3.98707	4.01228	3.68217	3.85499	3.78027
CG5180	0.0798893	0.00310606	18	3	0.0517746	3.36054	3.37974	3.39543	3.34595	3.36178	3.41917	3.32894	3.27651	3.2708	3.44993	3.45115	3.44814
nero	0.0798893	0.00310606	18	3	0.0512623	4.40928	4.48094	4.41968	4.36953	4.25417	4.40509	4.34719	4.33347	4.29398	4.43738	4.52864	4.68141
mod(r)	0.0798893	0.00310606	18	3	0.0508321	4.74748	4.75374	4.84096	4.75696	4.73593	4.70373	4.68185	4.66492	4.67753	4.8628	4.76768	4.83266
CG7239	0.0798893	0.00310606	18	6	0.0507756	3.42435	3.43814	3.42305	3.48109	3.46642	3.49486	3.38681	3.35553	3.36227	3.50104	3.45945	3.47689
grau	0.0798893	0.00310606	18	3	0.0492353	4.26431	4.32652	4.38572	4.3233	4.29946	4.29279	4.1913	4.25539	4.25367	4.39309	4.34468	4.39847
CG43759	0.0798893	0.00310606	24	12	0.0489704	1.69694	1.77594	1.76336	1.80843	1.78284	1.78427	1.84196	1.82692	1.84557	1.70834	1.77386	1.77308
CG11980	0.0798893	0.00310606	18	3	0.0474174	4.97434	4.86104	4.92499	4.88574	4.83323	4.86785	4.83132	4.82462	4.77245	5.00263	4.92995	4.92818
CG3808	0.0798893	0.00310606	24	18	0.0471564	2.73949	2.7476	2.73926	2.67907	2.7223	2.72898	2.80745	2.81866	2.75205	2.7794	2.76714	2.85418
CG9300	0.0798893	0.00310606	18	3	0.0464874	3.44531	3.53201	3.53517	3.47805	3.48494	3.39059	3.37921	3.43354	3.41659	3.5445	3.56473	3.60673
CG10195	0.0798893	0.00310606	24	0	0.0461219	3.34748	3.32513	3.29395	3.27636	3.2184	3.26305	3.20716	3.22095	3.21987	3.28337	3.25164	3.29185
dyn-p25	0.0798893	0.00310606	18	3	0.0456885	4.48627	4.62068	4.57042	4.56777	4.56999	4.57007	4.48515	4.50811	4.46175	4.79454	4.64522	4.71375
msl-1	0.0798893	0.00310606	18	6	0.0452688	3.18361	3.13995	3.15074	3.25952	3.18525	3.20397	3.11433	3.1432	3.11126	3.1918	3.15083	3.16097
Or71a	0.0798893	0.00310606	24	3	0.044358	1.90226	1.90987	2.05983	1.90082	1.97309	1.89638	1.88544	1.82573	1.83881	1.896	1.87822	1.87983
Pp2C1	0.0798893	0.00310606	24	3	0.0440668	3.63629	3.64741	3.69876	3.59039	3.63449	3.60931	3.58597	3.54742	3.57328	3.50512	3.57627	3.58766
fl(2)d	0.0798893	0.00310606	24	6	0.0439538	4.96492	4.98497	5.02599	5.00845	5.06179	5.06241	4.94791	4.9688	4.98229	4.95265	4.93493	4.93916
VhaM9.7-c	0.0798893	0.00310606	18	3	0.0434557	6.0395	6.11621	6.10589	6.02797	6.06904	6.07226	6.00211	5.96637	6.04444	6.2898	6.28263	6.20406
Xrp1	0.0798893	0.00310606	24	9	0.0432806	7.9889	7.98372	7.99434	8.0849	8.09069	8.07142	8.01898	8.02646	8.01982	7.987	7.98221	8.01341
Cam	0.0798893	0.00310606	18	12	0.0426117	7.29144	7.2488	7.33154	7.39159	7.36472	7.3568	7.3918	7.35098	7.56573	7.26935	7.17422	7.1176
CG6230	0.0798893	0.00310606	24	3	0.0417649	4.13176	4.01245	3.99922	4.00348	3.96458	3.97523	3.93895	3.94048	3.91989	3.93918	3.99636	3.96173
CG8368	0.0798893	0.00310606	18	3	0.0401849	3.46824	3.42678	3.48324	3.41418	3.44598	3.44172	3.31705	3.42641	3.36838	3.53318	3.4787	3.5501
SF2	0.0798893	0.00310606	24	12	0.039644	5.45537	5.45719	5.48277	5.49577	5.53093	5.53827	5.56401	5.58964	5.53528	5.51697	5.45915	5.52375
CG12320	0.0798893	0.00310606	18	3	0.0392109	2.79714	2.8709	2.78677	2.78217	2.78274	2.74169	2.7603	2.64026	2.72312	2.82785	2.79689	2.87892
CG14995	0.0798893	0.00310606	24	9	0.0387863	5.26669	5.28648	5.29473	5.31944	5.42003	5.33983	5.30697	5.36927	5.29014	5.26841	5.2655	5.26588
CG10669	0.0798893	0.00310606	24	3	0.038505	2.66896	2.65863	2.65623	2.65104	2.6082	2.6291	2.48246	2.55108	2.56359	2.63216	2.62808	2.62899
CtBP	0.0798893	0.00310606	18	12	0.036269	5.63201	5.59777	5.56863	5.64731	5.66316	5.63026	5.71053	5.70137	5.63956	5.53108	5.53357	5.56984
mre11	0.0798893	0.00310606	18	3	0.0346962	2.80545	2.8842	2.85299	2.78315	2.85233	2.80619	2.74238	2.80326	2.78434	2.97994	2.89797	2.97768
l(2)37Cb	0.0798893	0.00310606	18	3	0.0339001	3.06713	3.07911	3.04007	3.04849	3.06335	3.07363	3.03117	2.95823	2.93674	3.11349	3.1332	3.24204
MFS15	0.0798893	0.00310606	18	3	0.0336134	4.24059	4.19913	4.1974	4.19552	4.22023	4.23972	4.11251	4.15113	4.17797	4.28588	4.25439	4.25439
CG2126	0.0798893	0.00310606	18	3	0.0333921	3.4666	3.53394	3.48887	3.39456	3.45322	3.472	3.34734	3.41744	3.44679	3.61702	3.50209	3.56242
CG7927	0.0798893	0.00310606	18	3	0.0333233	4.58862	4.63098	4.61321	4.63292	4.59333	4.58579	4.57609	4.55385	4.53372	4.63427	4.69294	4.70264
Su(var)3-3	0.0798893	0.00310606	18	3	0.0300499	2.03619	2.06852	2.08555	2.04534	2.03811	2.01731	1.99741	1.98002	2.01879	2.10107	2.08465	2.1837
Nep3	0.0798893	0.00310606	24	15	0.0299746	3.37398	3.39414	3.37593	3.38779	3.3791	3.39843	3.43055	3.41794	3.46574	3.4061	3.41594	3.45145
CG30377	0.0798893	0.00310606	18	12	0.0298774	1.62464	1.59197	1.65045	1.66689	1.63026	1.61407	1.68248	1.68204	1.65174	1.53144	1.57569	1.47047
CG7006	0.0798893	0.00310606	18	3	0.028877	3.10877	3.17898	3.09129	2.99914	3.08158	3.06353	3.06793	3.03663	3.02772	3.24132	3.21333	3.29517
CG3071	0.0798893	0.00310606	18	3	0.028357	3.7724	3.84822	3.7994	3.748	3.75425	3.7611	3.72947	3.76548	3.65882	3.85039	3.80329	3.90918
Atg6	0.0798893	0.00310606	18	3	0.0272764	4.51948	4.47667	4.5372	4.47482	4.50211	4.50868	4.49046	4.45759	4.43286	4.60321	4.60522	4.58991
C3G	0.0798893	0.00310606	18	12	0.0264222	4.22769	4.26356	4.2974	4.32267	4.26469	4.29712	4.35941	4.30205	4.31398	4.04453	4.22601	4.20119
CG31643	0.0798893	0.00310606	18	3	0.0232696	2.94704	2.93637	3.00244	2.92995	2.94338	2.96639	2.90646	2.90712	2.93349	3.04177	3.06835	3.07555
CG33552	0.105352	0.00484848	24	15	0.0314976	1	1	1	1.02837	1	1.02516	1.0501	1.15825	1.07188	1.04454	1.01023	1.02716
TotC	0.105352	0.00659091	24	6	0.953352	6.61888	7.06168	6.71832	6.92281	6.91656	8.42712	5.73865	5.90448	5.28642	5.37104	5.46929	5.66413
to	0.105352	0.00659091	24	3	0.626776	9.19996	8.76807	8.74989	7.6664	7.82113	8.13415	7.35792	7.38586	7.32175	7.50023	7.16362	7.33163
Mdr50	0.105352	0.00659091	18	12	0.55261	3.59325	2.98775	2.86522	3.10361	2.87092	2.89304	3.90818	3.64673	3.92742	2.06805	2.29032	2.79513
CG3523	0.105352	0.00659091	18	15	0.52489	8.95213	8.56711	8.79075	7.99996	8.08456	8.12823	9.03991	8.82687	8.92152	7.56633	8.14373	8.20998
Tsp42Ea	0.105352	0.00659091	24	6	0.497656	2.34692	2.18826	2.57912	2.41991	2.45643	2.63872	2.38654	2.27308	1.64632	1.6072	1.54675	1.54052
Thor	0.105352	0.00659091	24	15	0.465173	8.24456	8.27914	7.73464	8.2762	7.8023	8.15067	8.97847	8.84778	8.93983	8.30752	8.48896	8.49765
CG3999	0.105352	0.00659091	18	12	0.455979	4.19509	4.23571	4.47018	4.42063	4.13791	4.3046	4.93775	4.89154	5.15748	3.08013	3.62802	3.66611
epsilonTry	0.105352	0.00659091	24	3	0.453467	6.14015	6.27095	6.28894	6.28772	5.77071	6.27399	5.50023	5.42345	5.51546	5.5404	5.70815	5.8405
CG18748	0.105352	0.00659091	18	12	0.425739	3.98044	3.52995	3.32676	3.60655	3.50215	3.80101	4.35139	4.31441	4.13204	2.77446	3.37314	3.31767
ACC	0.105352	0.00659091	18	15	0.421971	7.17227	6.74658	6.68579	6.6802	6.61615	6.57552	7.60136	7.4443	7.49575	6.26274	6.62437	6.66482
cbt	0.105352	0.00659091	18	15	0.401594	5.51052	5.40919	5.43039	5.19196	5.16734	5.09545	6.05253	6.07608	5.7599	4.88449	5.29996	5.10555
CG6870	0.105352	0.00659091	24	18	0.37261	2.77734	2.71999	2.92054	2.72766	2.63415	2.50219	3.00399	2.91359	3.78453	3.42209	3.17514	3.50364
CG31288	0.105352	0.00659091	18	12	0.36047	5.06065	4.44532	4.71855	4.84722	4.55087	4.73287	5.45895	5.041	5.43558	4.17829	4.40652	4.366
LysE	0.105352	0.00659091	24	3	0.345221	4.68377	4.65561	5.04585	4.81574	4.58052	4.84533	4.06904	4.31028	3.9306	4.5737	4.2834	4.36415
CG14529	0.105352	0.00659091	24	3	0.331152	2.45763	2.33776	2.50519	2.27012	2.00438	1.9004	1.79595	1.64588	1.86369	1.79505	1.98911	1.78113
CG10960	0.105352	0.00659091	24	15	0.329553	5.30588	5.16851	5.04034	5.51021	5.46497	5.57014	5.77268	5.81806	5.89399	5.94738	5.76814	5.85035
CG34291	0.105352	0.00659091	24	0	0.302387	4.23475	4.10625	4.16137	3.84705	3.63823	3.88363	3.57009	3.51015	3.57704	3.5585	4.00121	4.07535
CAH2	0.105352	0.00659091	24	6	0.270665	7.16494	7.15041	7.23167	7.18585	7.41298	7.00185	6.90235	7.03855	6.89273	6.69884	6.7287	6.44539
CR12628	0.105352	0.00659091	24	6	0.266656	2.17293	2.21415	2.12248	2.14581	2.31666	2.34739	2.19819	2.02616	1.88351	1.74412	1.67589	1.71635
vri	0.105352	0.00659091	24	18	0.265668	5.7921	5.75398	5.56604	5.66817	5.64589	5.61901	5.85107	5.9369	5.71086	6.59198	6.54081	6.64988
Npc2b	0.105352	0.00659091	24	15	0.261122	6.28145	6.33408	6.27667	6.65656	6.66394	6.54725	6.76166	6.8537	6.70443	7.0945	6.82551	6.70229
CG4607	0.105352	0.00659091	18	12	0.257181	5.88072	5.85681	5.80607	5.86687	5.87284	5.7445	6.24545	6.20417	6.23135	5.39272	5.48327	5.30379
BG642312	0.105352	0.00659091	24	3	0.249055	4.04719	3.75295	4.01514	3.64723	4.00066	3.93966	3.34878	3.42649	3.56504	3.71491	3.46874	3.70756
CG34327	0.105352	0.00659091	24	15	0.24795	1.32305	1.46087	1.58674	1.65124	1.63651	1.41898	1.93987	1.84235	1.93244	2.0058	1.79501	1.7299
CG12338	0.105352	0.00659091	24	18	0.238889	5.97836	5.88121	5.81719	5.89081	5.86128	5.90165	6.19445	6.02758	6.16814	6.29058	6.27047	6.35838
CG12268	0.105352	0.00659091	18	12	0.232755	3.30741	3.23709	3.02684	3.08549	3.28416	3.06757	3.43203	3.63658	3.48969	2.85941	2.89502	2.795
CG42351	0.105352	0.00659091	24	3	0.229586	7.12901	7.1261	7.28439	7.11911	7.2351	7.15621	6.76507	6.70923	6.72618	7.03155	7.12352	6.86037
burs	0.105352	0.00659091	24	6	0.228975	1.4575	1.61185	1.70084	1.48206	1.89014	1.56495	1.38383	1.27566	1.47152	1.19203	1.17537	1.15709
CG5910	0.105352	0.00659091	24	15	0.224099	4.72965	4.57911	4.85351	4.76232	4.6542	4.73771	5.23178	5.14907	5.3324	4.77678	4.90372	4.92581
Ag5r	0.105352	0.00659091	18	3	0.211269	8.59562	8.29517	8.47732	8.39245	8.04873	8.44868	8.09116	8.08114	8.17854	8.62512	8.64221	8.75921
CG13641	0.105352	0.00659091	24	21	0.209806	2.55791	2.65434	2.40762	2.36501	2.03931	2.42627	2.44936	2.3333	2.47812	2.75142	2.7451	3.22239
bgm	0.105352	0.00659091	24	15	0.209295	5.36819	5.3273	5.11968	5.37502	5.39483	5.44123	6.00258	5.71699	5.98911	5.26749	5.51311	5.54228
mthl8	0.105352	0.00659091	24	9	0.208238	3.13548	2.95768	2.78822	3.33362	3.42245	3.23334	3.03694	3.13661	3.31347	2.9435	2.97154	2.75194
CG8343	0.105352	0.00659091	24	15	0.203027	1.36974	1.30076	1.31364	1.32064	1.1664	1.4052	8.06138	8.4079	7.75977	1.44914	1.38907	1.4579
CHORD	0.105352	0.00659091	24	3	0.200413	4.40351	4.42202	4.50418	4.43899	4.48943	4.41897	3.94672	4.08045	4.03131	4.27947	4.23932	4.30508
daw	0.105352	0.00659091	24	18	0.196301	3.87897	3.97891	3.93464	3.74174	3.91242	4.02881	4.19773	4.11079	4.11038	4.2919	4.41228	4.17382
CG11149	0.105352	0.00659091	24	18	0.193045	3.1671	3.03921	3.20804	3.03981	2.9588	2.92573	3.40033	3.20413	3.3301	3.22641	3.41311	3.33511
Mct1	0.105352	0.00659091	18	15	0.184301	4.36239	4.27894	4.32313	4.22035	4.14568	4.22479	4.85299	4.70693	4.82554	3.73344	4.16228	4.24434
l(3)72Dp	0.105352	0.00659091	24	3	0.176942	4.05448	4.0768	3.67743	3.65697	3.79223	3.70131	3.49513	3.57509	3.49413	3.53951	3.506	3.49786
nub	0.105352	0.00659091	24	18	0.175637	2.20834	2.1169	2.04633	2.19623	2.07947	2.08361	2.35956	2.32871	2.29386	2.35204	2.54872	2.4374
Odc2	0.105352	0.00659091	18	15	0.172989	1.69896	1.50922	1.55149	1.40471	1.44716	1.43684	1.71644	1.6579	1.7905	1.52841	1.54746	1.62333
CG3699	0.105352	0.00659091	24	15	0.170198	7.89115	7.89405	7.8217	7.91224	7.83701	7.76266	8.38239	8.1581	8.41087	8.00402	7.92391	7.98789
Cyp12a4	0.105352	0.00659091	24	15	0.166633	7.02722	6.78775	6.90384	7.06215	7.00416	6.90864	7.27491	7.07772	7.31993	7.20078	7.09845	7.16271
CG31974	0.105352	0.00659091	24	15	0.163311	5.41906	5.25131	5.20816	5.31657	5.21557	5.334	5.68717	5.48219	5.60094	5.44343	5.43039	5.53673
Hsp70Bb	0.105352	0.00659091	24	3	0.162037	2.20807	2.1181	2.12475	2.08834	2.2213	2.07542	1.85953	1.87437	1.89757	1.86874	2.03798	1.9481
CG15506	0.105352	0.00659091	24	15	0.159309	2.06393	2.19672	2.14654	2.42062	2.48264	2.39476	2.53087	2.55088	2.49641	2.64158	2.43874	2.4561
Rpi	0.105352	0.00659091	18	12	0.158959	5.41661	5.25466	5.22029	5.40211	5.32157	5.20497	5.56889	5.4451	5.54886	5.13198	5.15866	5.14861
CG3764	0.105352	0.00659091	18	15	0.157154	3.64319	3.64924	3.62123	3.4454	3.52416	3.55476	3.91771	3.85576	3.85041	3.39232	3.57321	3.45032
Cyp9b2	0.105352	0.00659091	24	12	0.155173	7.39219	7.24557	7.32283	7.47866	7.53634	7.39761	7.6059	7.61809	7.66768	7.46247	7.33247	7.23054
CG10131	0.105352	0.00659091	18	3	0.14876	5.73591	5.74395	6.01926	5.75041	5.73052	5.83571	5.60009	5.42839	5.61888	6.05776	5.94614	6.06578
CG5527	0.105352	0.00659091	24	18	0.145399	2.6526	2.7809	2.52089	2.55881	2.24495	2.61782	2.77855	2.65457	2.73073	2.79531	2.95672	2.83429
CG33774	0.105352	0.00659091	24	6	0.144727	5.48434	5.39074	5.36102	5.40697	5.56739	5.58332	5.24656	5.43504	5.28495	5.20393	5.25005	5.18444
Cyp6g2	0.105352	0.00659091	24	3	0.144043	4.31375	4.42159	4.66887	4.30295	4.32478	4.3816	4.14255	4.21544	4.0037	4.19139	4.15582	4.17745
snoRNA:Me28S-A3365	0.105352	0.00659091	24	6	0.143824	2.02375	1.91488	1.88227	1.95012	2.19987	2.10842	1.41321	1.82966	1.91003	1.74584	1.7948	1.8261
yellow-f2	0.105352	0.00659091	24	15	0.143359	6.07243	6.06697	6.08094	6.18411	6.24606	6.15932	6.32523	6.3654	6.31874	6.42291	6.36139	6.25717
CG11999	0.105352	0.00659091	18	6	0.142531	5.46958	5.47265	5.37475	5.48	5.5951	5.61898	5.27843	5.27032	5.3168	5.53256	5.50039	5.68573
b6	0.105352	0.00659091	24	0	0.140161	1.71147	1.73892	1.79077	1.49496	1.3989	1.50306	1.41018	1.43153	1.42182	1.43171	1.56815	1.55741
CG6074	0.105352	0.00659091	24	18	0.138463	6.3359	6.31652	6.40593	6.29538	6.36624	6.47511	6.5495	6.52477	6.47646	6.63416	6.57462	6.58892
Adgf-D	0.105352	0.00659091	24	15	0.138067	5.42819	5.33882	5.17822	5.47954	5.50045	5.32585	5.62391	5.50268	5.69524	5.53205	5.55691	5.6085
mir-13b-1	0.105352	0.00659091	24	9	0.138001	1.26857	1.28591	1.14323	1.50111	1.32986	1.45202	1.31764	1.42904	1.43946	1.2852	1.20017	1.06233
Galk	0.105352	0.00659091	18	12	0.137543	6.90509	6.8691	6.78671	6.94741	7.03488	6.82145	7.0914	7.05954	7.19277	6.80304	6.85665	6.73026
CG15237	0.105352	0.00659091	24	6	0.137416	5.57683	5.75964	5.60669	5.69803	5.64128	5.6928	5.61056	5.50851	5.50231	5.33531	5.41119	5.42613
Cda4	0.105352	0.00659091	24	9	0.134141	1.67139	1.53235	1.70832	1.74879	1.85731	1.71508	1.68667	1.77336	1.63232	1.50328	1.49318	1.4183
CG12512	0.105352	0.00659091	18	15	0.13103	5.11804	5.1647	5.12594	5.10555	5.05243	5.06512	5.50592	5.39483	5.38144	5.15191	5.13971	5.07165
CG9396	0.105352	0.00659091	18	15	0.130477	7.19244	7.06532	7.10798	7.08601	6.91608	6.95741	7.29313	7.17082	7.27054	7.05014	7.05335	6.99854
CG3332	0.105352	0.00659091	18	3	0.128687	2.87253	2.96463	3.04107	2.96989	3.0104	2.95308	2.69722	2.5498	2.84227	3.22744	3.18723	3.21459
CG14879	0.105352	0.00659091	18	12	0.128305	3.55517	3.35471	3.50269	3.43291	3.51682	3.42117	3.715	3.68414	3.5714	3.18261	3.1805	3.1938
EfSec	0.105352	0.00659091	18	3	0.126456	2.12987	1.90927	2.10762	2.05241	2.04012	2.05766	1.90044	1.87728	1.87209	2.11608	2.1159	2.2484
CG12290	0.105352	0.00659091	24	9	0.125847	3.38897	3.26701	3.37696	3.47508	3.53286	3.42875	3.35738	3.49029	3.44907	3.25703	3.18136	3.23649
Vha36-3	0.105352	0.00659091	18	3	0.125067	6.032	6.29975	6.34922	6.21125	6.23681	6.25942	6.10515	6.06614	6.01359	6.50195	6.43144	6.41008
CG8358	0.105352	0.00659091	24	12	0.124093	3.45684	3.39515	3.40508	3.58915	3.623	3.5794	3.76659	3.65759	3.75953	3.58095	3.6813	3.51709
CG3476	0.105352	0.00659091	24	18	0.122615	4.51579	4.51929	4.61143	4.57303	4.52363	4.50498	4.63696	4.74335	4.65102	4.71764	4.75272	4.75344
CG34215	0.105352	0.00659091	24	12	0.121753	6.93206	6.87715	6.84808	7.01799	7.01383	7.2627	7.27621	7.17153	7.10614	7.13715	6.97873	7.00388
CG1443	0.105352	0.00659091	24	12	0.121571	7.00172	6.96068	7.06259	7.0426	7.20679	7.11196	7.29857	7.31332	7.25374	7.11798	7.01084	7.09707
retm	0.105352	0.00659091	24	15	0.120391	5.56865	5.49321	5.47685	5.56484	5.65227	5.54536	5.82289	5.88924	5.75158	5.64675	5.63965	5.62238
CG34301	0.105352	0.00659091	24	6	0.119153	2.58214	2.61509	2.64476	2.65371	2.83211	2.67833	2.48556	2.44003	2.58409	2.44036	2.52562	2.47504
Phae1	0.105352	0.00659091	24	12	0.118361	5.31562	5.26596	5.28611	5.37902	5.31904	5.42567	5.66537	5.57778	5.58653	5.27378	5.31261	5.40675
Ance	0.105352	0.00659091	24	21	0.115749	6.52204	6.55939	6.65607	6.52736	6.43986	6.3596	6.51618	6.44087	6.47791	6.66192	6.72291	6.62911
CG34402	0.105352	0.00659091	24	6	0.114225	2.97413	2.96736	3.05882	3.19303	3.25008	3.10177	2.8875	2.9696	3.03137	2.94079	2.88779	2.85169
CG16717	0.105352	0.00659091	18	3	0.113078	4.30843	4.42346	4.44002	4.39404	4.38042	4.34381	4.22051	4.19856	4.22652	4.55192	4.44199	4.41604
CG7837	0.105352	0.00659091	18	6	0.11184	2.51185	2.48578	2.55421	2.57557	2.66655	2.60245	2.41741	2.31846	2.40001	2.55245	2.51137	2.62057
Aldh	0.105352	0.00659091	24	18	0.111753	9.09823	9.16738	9.18262	9.20236	9.15412	9.157	9.29036	9.23369	9.24481	9.39638	9.3964	9.37376
CG1358	0.105352	0.00659091	24	15	0.109625	2.99683	3.123	3.0759	3.02705	3.139	3.12599	3.28022	3.21084	3.40764	3.13445	3.22433	3.234
PGRP-LF	0.105352	0.00659091	24	9	0.109583	4.50795	4.34676	4.26709	4.44991	4.45151	4.54589	4.37247	4.41464	4.3974	4.24711	4.24262	4.1508
CG8027	0.105352	0.00659091	18	3	0.108391	2.27519	2.25143	2.37057	2.22083	2.28291	2.1532	2.00694	2.1219	2.10671	2.29664	2.32173	2.32794
CG16868	0.105352	0.00659091	24	3	0.108341	2.26853	2.23658	2.22565	2.23395	2.16523	2.14568	1.918	1.95182	1.94812	2.10673	2.193	2.21334
Tsp26A	0.105352	0.00659091	24	3	0.108085	2.77978	2.73727	2.7798	2.71523	2.77823	2.77496	2.54361	2.66618	2.61692	2.69809	2.62181	2.61635
CG3226	0.105352	0.00659091	18	6	0.106928	6.62921	6.72355	6.64128	6.71802	6.70033	6.79691	6.54911	6.44932	6.49462	6.66644	6.69984	6.6787
CG6723	0.105352	0.00659091	24	18	0.106292	3.99536	4.10907	4.04144	4.03371	4.05817	4.09344	4.18458	4.19506	4.19037	4.20361	4.30934	4.21264
Piezo	0.105352	0.00659091	24	3	0.105285	3.81542	3.74326	3.65244	3.65235	3.65266	3.72156	3.53666	3.54022	3.54907	3.39108	3.58496	3.60442
S2P	0.105352	0.00659091	18	3	0.104273	3.61338	3.614	3.53101	3.56366	3.5701	3.59213	3.38065	3.35166	3.45728	3.61085	3.68141	3.67353
Ilp6	0.105352	0.00659091	24	15	0.103016	4.36549	4.37392	4.17707	4.43501	4.39206	4.40768	4.81519	4.67769	4.57672	4.22517	4.50907	4.47727
CG13775	0.105352	0.00659091	24	0	0.102993	2.44575	2.46337	2.46612	2.45858	2.29335	2.41285	2.18718	2.25161	2.2592	2.43559	2.40502	2.41309
CG5618	0.105352	0.00659091	18	3	0.10237	5.8625	5.87612	6.06705	5.79362	5.81586	5.88401	5.73923	5.61567	5.71092	5.98433	5.9263	6.01041
frac	0.105352	0.00659091	24	12	0.102251	2.01863	2.02866	2.04068	2.10163	2.24688	2.14412	2.248	2.23695	2.22121	2.13958	2.02795	2.09731
CG12910	0.105352	0.00659091	18	6	0.101499	2.23285	2.22434	2.25602	2.37213	2.37639	2.36792	2.17291	2.0615	2.24378	2.35931	2.28752	2.43204
CG12909	0.105352	0.00659091	18	3	0.100686	2.93238	2.92533	2.85731	2.92463	2.93254	2.79809	2.66329	2.82367	2.58596	2.96125	2.97346	2.9501
CG3294	0.105352	0.00659091	18	6	0.0996835	2.64863	2.62494	2.69118	2.68866	2.81185	2.7896	2.54778	2.62936	2.53412	2.66369	2.69678	2.67087
CycE	0.105352	0.00659091	24	6	0.0976246	1.57706	1.63635	1.624	1.63712	1.53302	1.67953	1.50054	1.46544	1.55363	1.40932	1.43752	1.49538
CG2794	0.105352	0.00659091	24	3	0.0967942	2.76309	2.79408	2.81536	2.70562	2.64385	2.71611	2.53041	2.54602	2.58937	2.6614	2.58253	2.71757
snoRNA:Psi18S-920	0.105352	0.00659091	18	12	0.0957024	1.99044	1.79903	2.0406	1.90143	2.1628	2.04595	2.16812	2.07965	2.17594	1.8823	1.87768	1.59554
CG14777	0.105352	0.00659091	18	3	0.0946304	5.43538	5.49412	5.43906	5.39686	5.24684	5.42583	5.32466	5.25458	5.292	5.44	5.45891	5.51392
CG14985	0.105352	0.00659091	24	0	0.0944584	2.55759	2.57758	2.6447	2.54992	2.48125	2.44799	2.41476	2.34198	2.44346	2.67871	2.51344	2.56575
Tango14	0.105352	0.00659091	24	3	0.093829	4.45338	4.54528	4.42749	4.43275	4.41432	4.41568	4.34632	4.25609	4.30137	4.27147	4.30367	4.32703
hyx	0.105352	0.00659091	18	6	0.093295	4.07782	4.18632	4.19748	4.22754	4.22221	4.26214	4.1302	4.07451	4.01861	4.23269	4.21596	4.2552
Atg8a	0.105352	0.00659091	24	18	0.0925774	9.00872	8.96685	9.00024	8.98961	8.97175	8.94597	9.08428	9.10768	9.10951	9.15711	9.15461	9.05327
CG3588	0.105352	0.00659091	18	12	0.0925161	2.25098	2.32441	1.9245	2.26582	2.34169	2.27017	2.59649	2.35847	2.45525	2.05895	2.08514	1.98792
CG4802	0.105352	0.00659091	18	3	0.0918378	5.21866	5.11711	5.218	5.20799	5.17543	5.13259	5.04823	5.00461	5.04622	5.2669	5.21404	5.27691
su(Hw)	0.105352	0.00659091	18	6	0.090992	3.35913	3.39303	3.43689	3.48986	3.48782	3.42544	3.25071	3.30579	3.29208	3.40111	3.37074	3.40544
CG8478	0.105352	0.00659091	18	6	0.0907437	1.63132	1.69666	1.67012	1.72786	1.75965	1.72959	1.53395	1.55729	1.5213	1.67054	1.63519	1.66515
Hsp70Bc	0.105352	0.00659091	24	3	0.0903604	1.52926	1.50756	1.62979	1.51207	1.49943	1.48387	1.32503	1.42811	1.36083	1.32385	1.42456	1.47908
yip2	0.105352	0.00659091	24	15	0.0901763	7.40883	7.46127	7.38629	7.64914	7.52894	7.50807	7.6362	7.66175	7.65587	7.557	7.61442	7.52463
Traf6	0.105352	0.00659091	18	6	0.0897316	3.02815	2.95432	3.05179	3.07629	3.15449	3.05267	2.88223	2.88641	2.92577	3.02631	2.99142	3.06733
Cyp309a1	0.105352	0.00659091	24	18	0.0894866	6.54509	6.35334	6.54985	6.51223	6.47112	6.48197	6.55338	6.54386	6.61646	6.66084	6.65383	6.67909
CG7099	0.105352	0.00659091	18	6	0.0894313	2.24567	2.21966	2.21144	2.2926	2.29658	2.25916	2.13269	2.07377	2.07933	2.15786	2.29142	2.29104
PyK	0.105352	0.00659091	18	15	0.0893261	8.89352	8.91322	8.92935	8.84458	8.85524	8.7869	9.0275	9.03673	9.02097	8.85898	8.94794	8.82483
L	0.105352	0.00659091	18	3	0.0891641	4.92414	4.9846	4.96855	4.9715	4.97691	4.95328	4.85014	4.79621	4.83033	5.09343	5.11884	5.11338
Glycogenin	0.105352	0.00659091	24	3	0.0889535	6.87178	6.93533	6.94583	6.85945	6.94078	6.91156	6.80768	6.78761	6.68536	6.79238	6.85444	6.79044
Lrt	0.105352	0.00659091	24	15	0.0882225	3.20375	3.22345	3.31287	3.27992	3.38942	3.36736	3.52154	3.4782	3.40102	3.35426	3.37202	3.37268
RhoGEF4	0.105352	0.00659091	24	3	0.0881592	1.66675	1.59356	1.65067	1.48954	1.61166	1.60368	1.4223	1.4228	1.45678	1.58432	1.51255	1.52527
CG10205	0.105352	0.00659091	18	9	0.087157	5.36128	5.44823	5.17064	5.50158	5.54855	5.64309	5.45911	5.48454	5.39694	5.47701	5.36319	5.36691
CG1907	0.105352	0.00659091	18	15	0.0867816	5.88656	5.86969	5.86881	5.80794	5.8101	5.81966	6.04582	5.98268	6.01785	5.84268	5.87194	5.92096
CG7694	0.105352	0.00659091	24	9	0.0860039	3.06177	3.06185	3.12748	3.13941	3.28033	3.26496	3.17199	3.15477	3.12599	2.90959	3.02503	3.11176
CG5514	0.105352	0.00659091	18	6	0.0853356	3.80721	3.91535	3.83165	3.96414	3.94415	3.95153	3.79808	3.8321	3.82347	3.86867	3.87681	3.94155
emc	0.105352	0.00659091	24	15	0.0849522	5.74382	5.71093	5.62239	5.65601	5.75708	5.75674	5.82669	5.84818	5.86055	5.89631	5.76336	5.7887
Qtzl	0.105352	0.00659091	18	3	0.0845015	2.7141	2.67395	2.62964	2.62689	2.65871	2.56992	2.3895	2.50387	2.5946	2.7054	2.66355	2.74672
tub	0.105352	0.00659091	24	0	0.0841738	4.40572	4.35608	4.48291	4.17651	4.28641	4.23664	4.21092	4.17014	4.16647	4.28563	4.22446	4.28489
Pak3	0.105352	0.00659091	24	12	0.083808	3.77549	3.7271	3.73048	3.82685	3.80633	3.84316	3.97057	3.94138	3.89332	3.73035	3.76941	3.8391
CG14527	0.105352	0.00659091	24	3	0.0836444	1.7065	1.75485	1.94213	1.77545	1.66882	1.67346	1.58279	1.65181	1.55787	1.64394	1.6084	1.60917
CG17680	0.105352	0.00659091	18	3	0.0835584	5.96253	6.0807	6.09763	6.0691	6.03877	6.09417	5.96498	5.90121	5.95513	6.18922	6.12776	6.10471
Npc2g	0.105352	0.00659091	18	3	0.0832172	8.70383	8.80808	8.85108	8.79992	8.77234	8.82672	8.66736	8.55916	8.70904	8.9962	8.97319	9.0007
CG11255	0.105352	0.00659091	24	12	0.0832159	6.51938	6.49255	6.1655	6.60789	6.54595	6.58626	6.62758	6.70967	6.53756	6.51981	6.53559	6.40982
Dref	0.105352	0.00659091	24	21	0.0830979	3.82625	3.84778	3.7623	3.74359	3.72292	3.6715	3.72733	3.81631	3.69756	3.84041	3.88153	3.86009
CG13016	0.105352	0.00659091	18	3	0.0830488	3.04186	3.01611	3.02312	2.93074	2.90099	3.00346	2.88601	2.8447	2.90378	3.00185	3.08019	3.06793
B-H1	0.105352	0.00659091	18	9	0.0828687	1.53232	1.51149	1.55944	1.60414	1.78425	1.64986	1.60267	1.68819	1.64951	1.64657	1.57322	1.60184
hb	0.105352	0.00659091	18	6	0.0828591	2.40607	2.44512	2.38987	2.48085	2.47216	2.50705	2.2897	2.25859	2.29299	2.48968	2.42252	2.4019
alphaTub85E	0.105352	0.00659091	18	3	0.0825787	1.67073	1.85149	1.84971	1.77505	1.78783	1.61311	1.68834	1.65826	1.57227	2.1427	1.92896	1.85308
ps	0.105352	0.00659091	18	12	0.0819825	5.21423	5.07957	5.06827	5.34129	5.09824	5.28153	5.30165	5.30997	5.2684	5.01213	5.02535	5.03066
Vrp1	0.105352	0.00659091	18	12	0.0812324	4.34348	4.37619	4.34574	4.27879	4.38604	4.38986	4.54363	4.47461	4.46347	4.06056	4.299	4.30648
CG7433	0.105352	0.00659091	24	15	0.0807968	6.35987	6.35953	6.38775	6.39895	6.48142	6.41029	6.50267	6.54505	6.52085	6.60625	6.41046	6.46271
CG10321	0.105352	0.00659091	18	6	0.0794688	4.01398	4.01374	4.04305	4.05622	4.08926	4.12637	3.9015	3.90204	3.94685	4.09861	4.07906	4.10283
tna	0.105352	0.00659091	24	15	0.0794525	4.44979	4.50824	4.38534	4.43088	4.4771	4.47309	4.62263	4.59227	4.61536	4.50199	4.52043	4.53922
CG14222	0.105352	0.00659091	24	0	0.0786155	4.97519	5.03427	5.02195	4.88114	4.89022	4.98092	4.85435	4.83756	4.87805	4.98224	4.96696	4.97654
CG6841	0.105352	0.00659091	18	6	0.0784805	3.4212	3.47346	3.43562	3.44231	3.53771	3.50476	3.27547	3.31021	3.32276	3.48463	3.48912	3.51806
Spps	0.105352	0.00659091	18	6	0.0779663	2.57984	2.52453	2.60203	2.60367	2.62398	2.60336	2.36805	2.38062	2.41174	2.4993	2.5993	2.59575
CG13993	0.105352	0.00659091	18	3	0.0776434	4.95404	5.04488	5.01127	4.96081	4.88311	4.89368	4.73341	4.87338	4.85101	5.0719	4.95295	5.08711
pk	0.105352	0.00659091	24	6	0.0767457	2.06179	2.13712	2.15375	2.1903	2.12027	2.1757	2.04386	2.04574	2.06656	1.91936	2.02512	2.04738
LanB1	0.105352	0.00659091	24	18	0.0767246	3.73957	3.66576	3.72491	3.6628	3.61403	3.69499	3.76659	3.83236	3.69701	3.83906	3.75889	3.85619
CG14667	0.105352	0.00659091	18	6	0.0761258	3.49096	3.5255	3.50912	3.60399	3.55521	3.63542	3.41542	3.49633	3.44135	3.67381	3.54975	3.58535
Taf7	0.105352	0.00659091	18	6	0.0758704	3.07888	3.10201	3.0808	3.16406	3.15523	3.13687	2.97207	2.94802	2.97915	3.20017	3.09247	3.15062
CG10777	0.105352	0.00659091	18	12	0.0757608	3.38584	3.28918	3.31005	3.4345	3.33726	3.36478	3.50513	3.47193	3.42988	3.32829	3.19753	3.2776
Rbsn-5	0.105352	0.00659091	18	3	0.0749815	3.46349	3.4109	3.44074	3.41492	3.40488	3.50087	3.25057	3.25441	3.36457	3.51872	3.48251	3.52402
bc10	0.105352	0.00659091	24	3	0.0745444	6.59721	6.61732	6.70165	6.57654	6.64312	6.60712	6.54439	6.46633	6.47062	6.57006	6.51586	6.50224
CG10324	0.105352	0.00659091	24	3	0.0738259	2.9493	2.8433	2.75488	2.81173	2.80067	2.80766	2.71758	2.58833	2.63192	2.77379	2.72923	2.77559
CG12129	0.105352	0.00659091	24	18	0.073694	4.03007	4.07116	4.10107	4.04711	4.07496	4.07706	4.16106	4.1406	4.10431	4.1797	4.23642	4.23618
Papst2	0.105352	0.00659091	18	3	0.0735664	3.9783	4.0001	3.92489	3.91625	4.02714	3.98466	3.84111	3.87916	3.88062	4.09099	4.09369	4.1056
CG17802	0.105352	0.00659091	24	3	0.0734169	2.54318	2.51755	2.55407	2.44338	2.51415	2.4763	2.43886	2.38332	2.34517	2.5066	2.37296	2.4291
CG11926	0.105352	0.00659091	18	3	0.0732818	4.62321	4.64694	4.68531	4.65356	4.62937	4.65102	4.51863	4.50289	4.55748	4.71644	4.72854	4.74866
Cerk	0.105352	0.00659091	24	12	0.0731274	5.05205	5.06311	5.12472	5.13438	5.25631	5.20186	5.26398	5.28496	5.23378	5.23099	5.12896	5.20868
CG11873	0.105352	0.00659091	24	6	0.0731054	2.75083	2.7257	2.70592	2.75372	2.72469	2.77605	2.63981	2.57419	2.68557	2.52324	2.63692	2.67399
Upf3	0.105352	0.00659091	24	3	0.0729524	3.52342	3.61948	3.62094	3.54969	3.51166	3.53594	3.48098	3.40141	3.38679	3.49669	3.46918	3.5244
cnc	0.105352	0.00659091	24	12	0.0712497	5.43279	5.40132	5.33484	5.48535	5.45688	5.44651	5.58703	5.55079	5.51366	5.38562	5.40483	5.4653
CG43187	0.105352	0.00659091	18	3	0.0710929	1.39798	1.51132	1.3139	1.17499	1.26233	1.34095	1.27537	1.23785	1.17504	1.534	1.54046	1.59192
gfzf	0.105352	0.00659091	18	6	0.0705932	3.56569	3.63769	3.64948	3.68638	3.66553	3.70565	3.56653	3.57419	3.54762	3.66941	3.67346	3.67341
Cht11	0.105352	0.00659091	24	21	0.070513	3.19737	3.24945	3.27714	3.1447	3.23282	3.13709	3.22584	3.23319	3.23957	3.38474	3.33193	3.33159
Fas3	0.105352	0.00659091	24	6	0.0703314	3.68267	3.70004	3.66871	3.69519	3.72287	3.65234	3.60226	3.64111	3.66404	3.49293	3.55254	3.53271
Smg5	0.105352	0.00659091	18	3	0.0702242	5.58367	5.64136	5.58617	5.59028	5.51516	5.53138	5.47645	5.47529	5.48725	5.5999	5.61194	5.62796
fru	0.105352	0.00659091	24	3	0.0699684	2.50794	2.49822	2.49792	2.46084	2.49668	2.52336	2.39855	2.40407	2.35032	2.43955	2.3605	2.41852
CG11906	0.105352	0.00659091	18	3	0.0698616	2.84531	2.92502	2.92839	2.87405	2.90127	2.90126	2.82622	2.78875	2.72997	2.98116	2.9125	2.96559
Rab-RP3	0.105352	0.00659091	18	6	0.0688663	4.76397	4.74949	4.75688	4.77631	4.84224	4.81948	4.60888	4.6733	4.65616	4.8531	4.79088	4.78917
Wdr82	0.105352	0.00659091	18	3	0.0681675	4.49308	4.54454	4.4896	4.44021	4.45332	4.58011	4.44273	4.33179	4.39668	4.64516	4.54577	4.59821
CG5872	0.105352	0.00659091	18	3	0.0680497	3.27376	3.3035	3.42636	3.28054	3.29546	3.28447	3.1843	3.16339	3.2693	3.38271	3.36058	3.44183
CG6540	0.105352	0.00659091	18	9	0.0679447	2.26524	2.29261	2.30568	2.42219	2.39447	2.47685	2.34186	2.31939	2.37638	2.3292	2.34195	2.35428
ntc	0.105352	0.00659091	18	12	0.0674788	4.87221	4.78258	4.79553	4.80123	4.87354	4.88958	4.91295	4.97011	4.95469	4.80216	4.7847	4.77901
ftz-f1	0.105352	0.00659091	18	12	0.0674155	3.01695	2.94806	2.83462	2.9863	3.02489	2.98148	3.05743	3.08164	3.08235	2.90547	2.86969	2.88615
Mtor	0.105352	0.00659091	18	6	0.0668977	3.31513	3.28697	3.282	3.36123	3.37099	3.32988	3.20848	3.17714	3.19415	3.25448	3.33555	3.35145
Plip	0.105352	0.00659091	24	18	0.066163	4.8687	4.95034	4.92175	4.85405	4.87669	4.85104	4.93751	4.92707	4.89532	5.08838	5.04794	5.02439
Cf2	0.105352	0.00659091	24	6	0.0658601	5.27139	5.23712	5.17019	5.20528	5.28621	5.29814	5.1657	5.22595	5.18658	5.09313	5.12696	5.11862
eco	0.105352	0.00659091	24	0	0.0655507	3.86413	3.92633	3.88643	3.87682	3.78046	3.78237	3.75291	3.76888	3.7282	3.78468	3.86833	3.85692
Dif	0.105352	0.00659091	18	9	0.0650643	5.02079	5.01997	5.08966	5.12402	5.18679	5.17013	5.15646	5.15859	5.12461	5.10157	5.0779	5.07786
abs	0.105352	0.00659091	24	18	0.0649101	3.51315	3.48647	3.53966	3.49048	3.45611	3.52098	3.61922	3.56577	3.54431	3.582	3.60322	3.65198
CG11357	0.105352	0.00659091	24	15	0.0645708	3.45296	3.46989	3.42579	3.48767	3.47442	3.49067	3.67216	3.6974	3.64235	3.53526	3.50784	3.42694
Glut1	0.105352	0.00659091	24	9	0.0645024	3.35506	3.40462	3.41746	3.43443	3.47184	3.49227	3.38465	3.45537	3.44031	3.32638	3.26925	3.35752
CG42724	0.105352	0.00659091	24	6	0.0635215	4.46578	4.51229	4.52101	4.52742	4.54643	4.5477	4.44067	4.42809	4.4748	4.35632	4.38578	4.49509
CG7741	0.105352	0.00659091	24	0	0.0632649	2.82448	2.81344	2.81698	2.64282	2.72939	2.78969	2.64003	2.69968	2.75408	2.79186	2.79472	2.73309
pea	0.105352	0.00659091	24	0	0.062359	3.01815	2.97985	2.96383	2.95817	2.90833	2.92956	2.86483	2.81779	2.84995	2.91122	2.9421	3.01551
CG14869	0.105352	0.00659091	24	3	0.0620438	3.17993	3.21331	3.28013	3.16767	3.24055	3.17805	3.11337	3.12468	3.11963	3.05786	3.12946	3.1639
CG6254	0.105352	0.00659091	18	6	0.0614862	3.0078	2.99954	3.00812	3.06085	3.02499	3.08108	2.90402	2.84582	2.96995	3.12728	3.018	3.07355
alpha-Spec	0.105352	0.00659091	24	9	0.0612904	6.19378	6.29128	6.22883	6.32849	6.32429	6.30329	6.28151	6.29945	6.30355	6.01963	6.19589	6.27642
CG8331	0.105352	0.00659091	18	3	0.0608049	6.91369	6.86737	6.95591	6.84	6.92448	6.92323	6.81407	6.80712	6.83723	7.10706	6.94145	6.98603
I-t	0.105352	0.00659091	18	0	0.0607517	1.1722	1.13993	1.22288	1.10919	1.07458	1.04497	1.05401	1.12355	1.08582	1.14546	1.12726	1.14387
tkv	0.105352	0.00659091	24	21	0.0604938	4.71437	4.71878	4.69964	4.59769	4.70773	4.66776	4.69503	4.70852	4.62218	4.7901	4.78	4.85216
ranshi	0.105352	0.00659091	18	3	0.0603062	2.5757	2.63047	2.64667	2.50366	2.54681	2.56782	2.4006	2.52418	2.49451	2.65035	2.5918	2.5799
CG30109	0.105352	0.00659091	18	3	0.0596909	3.02022	3.01724	3.09145	3.024	2.93049	2.97507	2.90106	2.92905	2.94704	3.23999	3.02942	3.08344
l(2)37Cc	0.105352	0.00659091	18	3	0.0583648	5.89295	5.87033	5.92893	5.77939	5.8284	5.81041	5.75698	5.71873	5.80462	5.88353	5.87836	5.99027
Art8	0.105352	0.00659091	18	3	0.0583126	2.85066	2.80587	2.73325	2.70054	2.71181	2.70913	2.71315	2.69607	2.61807	2.89508	2.77839	2.94146
dgt1	0.105352	0.00659091	18	3	0.0581465	3.81787	3.94534	3.9367	3.84232	3.91317	3.93408	3.76707	3.80288	3.86311	4.02529	3.95293	4.00089
mRpL50	0.105352	0.00659091	18	3	0.0577632	5.23711	5.23564	5.37945	5.36576	5.356	5.22644	5.16879	5.19414	5.1774	5.56359	5.37811	5.38623
CG11221	0.105352	0.00659091	18	15	0.057646	2.52734	2.55955	2.49596	2.44233	2.43579	2.48412	2.56005	2.57148	2.56565	2.38702	2.46098	2.45
CG4221	0.105352	0.00659091	18	6	0.0576286	2.11458	2.15369	2.1139	2.12998	2.21758	2.18	2.04628	2.00255	2.04959	2.16903	2.21697	2.16732
CR18217	0.105352	0.00659091	18	3	0.0574696	2.50927	2.55335	2.55523	2.52424	2.48325	2.53802	2.47208	2.43358	2.37695	2.60753	2.52879	2.62058
trx	0.105352	0.00659091	24	9	0.0569601	3.51295	3.44502	3.47288	3.58969	3.49174	3.61395	3.48374	3.45241	3.47919	3.3633	3.39166	3.43077
blos4	0.105352	0.00659091	18	3	0.056901	3.91319	3.82135	3.87853	3.88251	3.81029	3.91405	3.7099	3.80656	3.80178	4.16048	4.01517	3.99893
CG10470	0.105352	0.00659091	24	0	0.0563235	5.02988	5.00959	4.98771	4.95391	4.93893	4.87209	4.81999	4.90651	4.86511	4.96348	4.92169	4.91097
CG9773	0.105352	0.00659091	18	3	0.0555224	4.11368	4.01267	4.07262	4.06002	4.05013	4.10147	4.03149	3.88932	3.97505	4.13763	4.15767	4.18481
beta4GalNAcTA	0.105352	0.00659091	18	3	0.0547517	4.22008	4.21588	4.26429	4.20908	4.2907	4.25424	4.19014	4.11662	4.15146	4.43587	4.31686	4.3544
Cfp1	0.105352	0.00659091	18	6	0.0546835	3.10601	3.15185	3.15289	3.18334	3.15309	3.19082	3.08267	3.05296	3.01465	3.18078	3.14618	3.14618
CG9578	0.105352	0.00659091	18	3	0.0541728	4.03286	4.04897	4.00363	3.95821	4.01229	4.08867	3.87342	3.9913	3.92702	4.18928	4.16507	4.10021
CG43394	0.105352	0.00659091	24	18	0.0540726	3.81636	3.79548	3.80645	3.67518	3.70159	3.71898	3.86265	3.80941	3.82563	3.84838	3.85684	3.81888
CG43143	0.105352	0.00659091	24	9	0.0538671	4.23157	4.30855	4.22637	4.26984	4.32704	4.32319	4.23569	4.28825	4.23811	4.02151	4.16221	4.18449
asf1	0.105352	0.00659091	18	3	0.051985	3.91206	4.04598	3.96791	3.8738	3.89793	4.04028	3.85878	3.87224	3.92028	4.12842	4.06181	4.09235
mtd	0.105352	0.00659091	24	9	0.0517584	5.67682	5.61563	5.62887	5.70252	5.66025	5.75958	5.69148	5.64067	5.67072	5.53228	5.58751	5.61355
cdc2rk	0.105352	0.00659091	18	3	0.0516119	3.1594	3.28721	3.23851	3.14863	3.1544	3.18365	3.09396	3.08641	3.1574	3.29981	3.30619	3.20253
CG3548	0.105352	0.00659091	24	0	0.0507576	2.84185	2.84771	2.89439	2.84738	2.76851	2.80713	2.75053	2.73912	2.76422	2.80995	2.81834	2.86848
CG11807	0.105352	0.00659091	18	3	0.0497824	4.74484	4.80407	4.75109	4.77983	4.74835	4.77681	4.68217	4.62791	4.68996	4.93151	4.88993	4.87609
CG7332	0.105352	0.00659091	18	6	0.0496327	5.11144	5.13028	5.11386	5.21131	5.20544	5.14004	5.09794	5.06402	5.11727	5.16261	5.14229	5.18418
CG9797	0.105352	0.00659091	18	3	0.0494435	4.09424	4.09519	4.0923	4.10733	4.09342	4.07494	4.02527	4.01497	4.01637	4.16105	4.10322	4.13559
gpp	0.105352	0.00659091	18	12	0.0491888	3.2802	3.32057	3.36424	3.38996	3.36566	3.37981	3.45312	3.36049	3.45552	3.11875	3.25097	3.31389
CG5174	0.105352	0.00659091	18	3	0.0489095	5.96936	6.02902	6.04567	5.96951	6.01716	6.02965	5.93134	5.92459	5.96624	6.08442	6.03224	6.09774
CG17019	0.105352	0.00659091	18	6	0.0486075	4.01751	3.98342	3.96992	4.03082	4.03041	4.02263	3.90978	3.91467	3.93525	3.94188	4.0117	4.00609
Sesn	0.105352	0.00659091	18	3	0.0485707	6.76614	6.85102	6.77493	6.78246	6.69056	6.7555	6.71377	6.65099	6.70055	6.87046	6.99087	6.81722
CG8611	0.105352	0.00659091	24	0	0.0484229	2.05558	2.09409	2.06929	2.03684	2.01034	1.95853	1.96134	2.02361	1.95414	2.04631	2.02362	2.06633
CG13014	0.105352	0.00659091	18	3	0.0480794	3.58749	3.64166	3.60844	3.68824	3.61705	3.5596	3.55278	3.55092	3.46573	3.83974	3.74376	3.75414
Paf-AHalpha	0.105352	0.00659091	18	6	0.0476481	3.86873	3.86533	3.849	3.86433	3.92741	3.93611	3.71744	3.81086	3.841	3.89871	3.88695	3.87388
CG13090	0.105352	0.00659091	18	3	0.0472064	3.1392	3.01503	3.08179	3.07739	3.09217	3.06857	3.04928	2.95206	2.9905	3.15911	3.14113	3.1544
Ef2b	0.105352	0.00659091	24	18	0.0456977	10.2923	10.2642	10.3141	10.2795	10.3066	10.2572	10.3435	10.3159	10.2991	10.352	10.411	10.453
Gga	0.105352	0.00659091	24	15	0.0456162	3.96026	3.93999	3.94822	3.9768	4.01584	3.95239	4.05197	4.02395	4.05206	3.96689	3.98428	4.04213
alphaTub84D	0.105352	0.00659091	18	9	0.0455781	6.87976	6.86354	6.88958	6.95995	6.98892	6.97027	6.92458	6.934	6.93412	6.88234	6.95585	6.92657
osp	0.105352	0.00659091	18	12	0.0455747	3.80867	3.84378	3.79458	3.80199	3.92162	3.85631	3.86077	3.91754	3.92077	3.74753	3.72101	3.76933
Hmt4-20	0.105352	0.00659091	24	6	0.0455355	3.97259	4.00849	4.00318	4.01999	4.01163	4.05355	3.93762	3.89737	3.99432	3.81194	3.96574	3.97144
mRpL43	0.105352	0.00659091	24	0	0.0453307	4.39948	4.40625	4.43053	4.35169	4.3669	4.39019	4.20702	4.32884	4.27224	4.39666	4.30885	4.38434
CG2116	0.105352	0.00659091	18	3	0.045269	3.65051	3.61926	3.70818	3.63324	3.60528	3.65826	3.607	3.55524	3.55797	3.66357	3.71344	3.75439
CG14650	0.105352	0.00659091	18	3	0.0444445	3.83569	3.79333	3.81548	3.7891	3.8001	3.79055	3.71217	3.64628	3.75262	3.79484	3.83078	3.85061
CG7371	0.105352	0.00659091	24	21	0.0444093	4.69091	4.70035	4.71068	4.64139	4.64769	4.67212	4.6544	4.72821	4.67012	4.75355	4.73474	4.79253
CG9631	0.105352	0.00659091	18	9	0.0439605	5.23385	5.27673	5.2291	5.33057	5.34419	5.32563	5.32531	5.28716	5.29602	5.29133	5.24576	5.14702
CG6650	0.105352	0.00659091	18	3	0.0437676	3.4747	3.47247	3.47096	3.47861	3.41057	3.41386	3.46592	3.34796	3.3795	3.52467	3.51464	3.54795
CG13933	0.105352	0.00659091	18	3	0.0433945	4.28254	4.23102	4.2556	4.17766	4.24664	4.25568	4.14785	4.19423	4.19146	4.29922	4.29594	4.39978
Hdac3	0.105352	0.00659091	18	3	0.0433534	4.07714	4.11569	4.11836	4.10474	4.10375	4.1395	4.06764	3.97554	4.01582	4.20822	4.19107	4.20382
Snp	0.105352	0.00659091	18	9	0.0429507	3.79458	3.77482	3.78581	3.8556	3.87687	3.88729	3.80792	3.81958	3.83556	3.81044	3.79167	3.71348
CG5033	0.105352	0.00659091	18	3	0.0419785	3.58443	3.58078	3.57551	3.50199	3.61025	3.5722	3.45635	3.50844	3.55088	3.62489	3.63108	3.69296
lost	0.105352	0.00659091	24	15	0.0416717	7.55633	7.54284	7.50332	7.52576	7.60098	7.55927	7.6159	7.63887	7.60547	7.61505	7.56955	7.59644
CG7504	0.105352	0.00659091	24	3	0.0416536	1.86565	1.85217	1.84673	1.83966	1.82114	1.81102	1.74726	1.71769	1.80161	1.79832	1.76525	1.84571
Klp98A	0.105352	0.00659091	24	9	0.0415896	3.89834	3.91128	3.88225	3.92384	3.97007	3.97499	3.91457	3.94342	3.94154	3.84127	3.88295	3.89909
CG12576	0.105352	0.00659091	24	15	0.0410058	6.02337	5.96499	5.95817	6.02619	6.00994	5.99597	6.0913	6.06629	6.05266	6.01946	6.05844	6.0454
CG14646	0.105352	0.00659091	24	21	0.0398437	3.84079	3.81132	3.79038	3.73779	3.77002	3.77416	3.74742	3.7872	3.81274	3.86649	3.81608	3.86129
CG43861	0.105352	0.00659091	18	12	0.0398037	2.32773	2.48654	2.42867	2.38193	2.48375	2.49518	2.49007	2.49714	2.48933	2.23757	2.25227	2.26705
Gen	0.105352	0.00659091	18	0	0.0397433	1.63312	1.59907	1.62604	1.53747	1.55086	1.56983	1.57173	1.55213	1.60934	1.58205	1.58084	1.61322
Gbeta13F	0.105352	0.00659091	24	6	0.0394686	5.80193	5.74755	5.73792	5.78138	5.79552	5.82122	5.75523	5.73222	5.73986	5.70092	5.7166	5.71462
nahoda	0.105352	0.00659091	24	12	0.038153	4.76161	4.69218	4.75155	4.75718	4.79235	4.78733	4.81964	4.8582	4.81678	4.77689	4.73311	4.78114
CG11601	0.105352	0.00659091	24	18	0.0367913	4.41017	4.37408	4.37658	4.40154	4.35262	4.35772	4.41743	4.38544	4.40579	4.5446	4.44822	4.45244
Dbp45A	0.105352	0.00659091	18	3	0.0363792	4.43661	4.44487	4.44414	4.42404	4.44209	4.46412	4.33854	4.40515	4.35231	4.55157	4.46319	4.50621
Parg	0.105352	0.00659091	18	6	0.0335293	2.53762	2.50194	2.49226	2.5829	2.53544	2.58461	2.49096	2.49021	2.4072	2.50141	2.52715	2.56465
CG7028	0.105352	0.00659091	24	6	0.0332576	3.79554	3.76178	3.77827	3.82319	3.80804	3.78349	3.72122	3.77383	3.76535	3.73883	3.71707	3.75
psq	0.105352	0.00659091	18	12	0.0307995	4.296	4.22196	4.22518	4.25707	4.24233	4.25765	4.28224	4.33316	4.28589	4.19316	4.15087	4.21505
CG14478	0.105352	0.00659091	18	12	0.0295706	4.62518	4.66491	4.68046	4.68371	4.73068	4.69793	4.74696	4.70337	4.73431	4.57835	4.68149	4.65471
CG6907	0.105352	0.00659091	18	3	0.0291245	3.87182	3.88311	3.94851	3.86644	3.82249	3.81852	3.83063	3.76696	3.84942	3.97481	4.02983	3.94588
CG3527	0.105352	0.00659091	18	3	0.026696	3.83678	3.85866	3.82364	3.77503	3.80652	3.83159	3.82788	3.71325	3.78588	3.96932	3.87565	3.95633
CG31496	0.105352	0.00659091	24	3	0.0263653	1.16553	1.06131	1.09614	1.06446	1.05991	1.07954	1.03477	1.05396	1.02244	1.04105	1.06016	1.03736
Atf3	0.105352	0.00659091	18	12	0.0250282	4.0684	4.02028	4.03806	4.03955	4.12033	4.09374	4.13564	4.09565	4.06797	4.0038	3.96498	3.92823
Rassf	0.105352	0.00659091	18	3	0.0241359	3.55473	3.52173	3.48759	3.51097	3.49467	3.54182	3.47004	3.47743	3.49098	3.58206	3.5625	3.59072
CG4806	0.105352	0.00659091	24	3	0.0234228	3.99648	4.07375	4.02423	3.99206	3.99728	4.01135	3.92581	3.98256	3.81939	4.00526	3.98629	3.99105
PpD3	0.105352	0.00659091	18	3	0.022701	4.28161	4.21809	4.24494	4.20996	4.20483	4.19032	4.1786	4.21284	4.16028	4.30713	4.266	4.25187
dally	0.105352	0.00659091	18	12	0.0200292	5.13711	5.16677	5.17554	5.17934	5.20564	5.21736	5.2114	5.23711	5.1724	5.01859	5.10229	5.07138
CG32181	0.105352	0.00659091	18	12	0.0148243	1.0044	1.0141	1.01343	1.02367	1.02198	1.01577	1.03669	1.06328	1.03538	1.01686	1.00427	1.01137
Tpl94D	0.105352	0.00659091	24	12	0.014312	1	1	1.00685	1.0181	1.03342	1.01605	1.01612	1.26313	1.03853	1.01716	1.013	1.0058
CG42554	0.105352	0.00659091	18	3	0.0133635	3.82228	3.79734	3.79037	3.77468	3.78476	3.78375	3.6768	3.76421	3.80338	4.03216	3.91067	4.01521
Spred	0.105352	0.00659091	18	12	0.00719198	4.21896	4.22361	4.20294	4.22172	4.23442	4.2781	4.23144	4.31016	4.22596	4.14402	4.0893	4.11607
CG18493	0.138713	0.0129924	24	3	0.537626	5.37779	5.3034	5.39039	4.65379	4.57236	4.61118	4.21375	4.20661	4.35149	3.92801	4.55811	4.06748
CG9837	0.138713	0.0129924	18	15	0.487654	4.78226	4.39452	4.55769	4.40309	4.09261	4.29436	5.83256	5.82118	5.72293	4.41908	4.51361	5.01137
per	0.138713	0.0129924	24	18	0.472783	2.51341	2.63786	2.56625	2.62266	2.59366	2.63412	3.0246	2.96391	3.08275	3.49484	3.61853	3.72555
CG15263	0.138713	0.0129924	24	3	0.437038	4.95247	4.67974	5.09158	4.89527	4.58567	4.59361	4.01599	3.61479	4.01734	4.28872	5.05929	4.22453
CG9119	0.138713	0.0129924	18	12	0.388909	7.33102	7.1375	6.98744	7.26579	7.0739	6.98196	7.93805	7.60602	7.80589	6.53786	6.61464	6.46274
CG16775	0.138713	0.0129924	18	6	0.380819	2.50279	2.51486	2.42104	3.39554	3.5059	2.88771	2.34915	2.31952	2.66631	2.50147	2.88445	2.86606
CG5773	0.138713	0.0129924	18	3	0.364454	6.47049	6.60461	6.78022	6.65371	6.70773	6.76508	6.09	6.17272	6.0892	7.54521	7.24832	7.2734
CG14120	0.138713	0.0129924	18	12	0.346198	2.70844	1.73835	2.29615	2.947	2.63118	3.15095	3.4366	2.47826	3.43774	1.54538	1.89849	1.44455
CG1600	0.138713	0.0129924	18	15	0.343404	6.75611	6.97481	6.72551	6.73145	6.51166	6.51371	7.59744	7.49766	7.22303	6.06018	6.60605	6.63698
l(2)08717	0.138713	0.0129924	18	15	0.343087	5.27712	5.37019	5.43843	5.22886	5.00881	5.1286	6.31463	6.20712	6.07103	5.26243	5.59325	5.57487
CG14406	0.138713	0.0129924	24	15	0.339895	2.03804	1.79693	1.73096	2.18282	1.93859	1.81784	2.37542	2.30521	2.57169	2.19128	2.53441	2.38983
CG31324	0.138713	0.0129924	24	18	0.327575	2.46283	2.57729	2.30036	2.5536	2.35109	2.54958	2.74647	2.56564	2.87307	3.08072	3.1516	3.04297
sug	0.138713	0.0129924	24	18	0.32699	4.37108	4.52777	4.20998	4.29847	4.41519	4.52752	4.87207	4.76336	4.66871	4.98918	5.04523	4.83105
CG3597	0.138713	0.0129924	24	18	0.303556	5.51053	5.40503	5.34383	5.50264	5.47939	5.4756	5.78019	5.76868	5.81172	6.00627	5.91693	5.99541
AcCoAS	0.138713	0.0129924	18	15	0.297429	8.38679	8.2408	8.27543	8.02502	8.03931	8.06771	8.82203	8.69076	8.7923	7.95455	8.12311	7.99775
LKR	0.138713	0.0129924	24	15	0.295009	3.67865	3.85952	3.637	3.94248	3.63437	3.8826	4.36139	4.13115	4.44523	3.84315	4.1035	4.09415
Gclm	0.138713	0.0129924	24	15	0.283399	6.48498	6.44288	6.58047	6.46186	6.54861	6.37385	7.02399	6.97046	6.95107	6.67484	6.77673	6.8549
snoRNA:Me18S-C1096	0.138713	0.0129924	24	3	0.280414	1.72662	1.90822	2.00145	1.82801	1.78182	1.5759	1.37357	1.54773	1	1.43267	1.30817	1.70999
betaInt-nu	0.138713	0.0129924	24	15	0.256478	3.03832	2.78093	2.69494	2.98115	2.72416	2.78542	3.39429	3.16077	3.25179	3.00554	3.19237	3.1025
Hsp70Aa	0.138713	0.0129924	24	6	0.248598	1.57029	1.44005	1.52706	1.52869	1.41937	1.5025	1.2031	1.28003	1.13077	1.09071	1.12143	1.09159
CG3277	0.138713	0.0129924	24	15	0.248398	2.34341	2.30518	2.17253	2.34562	2.09498	2.33026	2.90486	2.73416	2.8458	2.33448	2.49584	2.41456
CG15368	0.138713	0.0129924	24	6	0.24049	2.92701	2.75591	3.29833	3.0354	3.35281	2.94424	2.90302	2.92957	2.90941	2.75051	2.43143	2.40017
CG31087	0.138713	0.0129924	18	12	0.238084	3.63776	3.62711	3.83488	3.90969	3.48072	3.83385	4.08924	3.96381	4.26338	3.19844	3.6212	3.58475
pgant8	0.138713	0.0129924	18	3	0.237124	3.07528	2.97629	3.12964	3.03388	2.98373	3.06687	2.67855	2.64839	2.70535	3.15727	3.04066	3.13247
Cyp309a2	0.138713	0.0129924	24	18	0.235322	4.82691	4.7045	4.66117	4.72248	4.69329	4.62095	5.02251	4.90099	5.06329	4.99547	5.12323	5.06166
ppl	0.138713	0.0129924	18	15	0.23323	7.13398	7.0236	7.16071	6.69377	6.83257	6.81901	7.25309	7.16208	7.16981	6.81104	6.81767	6.72985
pirk	0.138713	0.0129924	24	6	0.231844	3.46844	3.40055	3.42212	3.91896	3.61812	3.76174	3.17589	3.28207	3.46357	3.00941	3.10246	3.45543
Ork1	0.138713	0.0129924	18	15	0.230223	3.5245	3.57595	3.72947	3.25037	3.32264	3.36479	3.79483	3.78313	3.62886	3.14086	3.30246	3.41025
CG14968	0.138713	0.0129924	24	15	0.226599	3.03512	2.78057	2.87301	3.12533	2.99673	3.03677	3.36943	3.14104	3.28827	3.25549	3.36233	3.3434
tRNA:CR31576	0.138713	0.0129924	24	6	0.22278	1.81754	1.94018	2.04928	2.48818	2.41959	2.17426	1.93937	1.97662	1.73415	1.92286	1.7986	1.49701
CG1578	0.138713	0.0129924	18	12	0.219201	4.35474	4.35177	4.38486	4.44711	4.42717	4.43619	4.76089	4.69486	4.72637	4.21539	4.29553	4.48156
SpdS	0.138713	0.0129924	24	21	0.215963	4.53812	4.37295	4.46212	4.14885	4.19636	4.12673	4.10907	4.25123	4.35941	4.71778	4.47288	4.45954
CG14153	0.138713	0.0129924	24	21	0.210803	5.01915	5.1556	5.06675	4.86105	4.65896	4.71984	4.85585	4.86217	4.78355	5.21456	5.1362	4.99656
Ance-4	0.138713	0.0129924	24	15	0.207273	5.57062	5.50179	5.42759	5.5707	5.49249	5.4088	5.86047	5.80231	5.79906	5.72951	5.63736	5.8018
CG7768	0.138713	0.0129924	24	3	0.202425	3.97269	3.93757	3.88243	3.91095	3.79764	4.021	3.55508	3.65185	3.50261	3.5956	3.85659	3.71927
CR40469	0.138713	0.0129924	24	9	0.199068	5.23877	5.47071	5.74612	5.86556	5.86401	5.77327	5.49325	5.51729	5.43507	5.31813	5.21425	5.27851
CG14186	0.138713	0.0129924	18	15	0.19891	3.04848	3.19271	2.95145	2.85359	2.77104	2.96818	3.13594	3.20085	3.65817	2.97067	3.05625	3.03846
pyr	0.138713	0.0129924	24	3	0.197804	3.1465	3.15496	3.14894	3.01373	3.04767	3.05538	2.84214	2.79399	2.85907	2.79621	2.85462	2.77605
CG18745	0.138713	0.0129924	24	15	0.193692	3.75885	3.4836	3.48439	3.89253	3.53155	3.67465	3.94949	3.87957	3.97029	3.83296	3.94765	3.87269
CG6034	0.138713	0.0129924	24	18	0.190742	1.81082	1.88223	1.99444	1.80971	1.7599	1.77109	2.07469	2.08462	2.19603	2.22553	1.9966	2.06003
CG6910	0.138713	0.0129924	24	12	0.185585	8.42443	8.51173	8.30488	8.59899	8.50926	8.59165	8.9347	8.88492	9.09782	8.54469	8.65457	8.49462
mbf1	0.138713	0.0129924	24	3	0.185208	5.50482	5.42247	5.58063	5.42777	5.49678	5.54063	4.98139	4.98671	5.12443	5.36795	5.31962	5.43912
CG3940	0.138713	0.0129924	24	15	0.180341	6.01725	6.08068	6.18854	6.18526	6.31565	6.20464	6.44653	6.45919	6.38761	6.57118	6.42077	6.28491
CG12896	0.138713	0.0129924	24	12	0.179491	2.8408	2.72591	2.54656	2.94848	2.74586	2.88802	3.10967	3.15142	3.30741	2.8621	2.9318	2.69096
CG15117	0.138713	0.0129924	24	6	0.176457	4.11578	4.0393	4.16431	4.17046	4.04939	4.28058	3.97268	3.77867	3.92003	3.57231	3.92179	3.93981
Or59b	0.138713	0.0129924	24	18	0.174668	1.09709	1.26166	1.15528	1.14634	1.27473	1.14498	1.28436	1.33554	1.43296	1.7246	1.39268	1.54267
CG14160	0.138713	0.0129924	24	15	0.170767	3.49684	3.483	3.42368	3.54058	3.5548	3.58484	3.72819	3.7122	3.80267	3.72042	3.87638	3.74458
CG10505	0.138713	0.0129924	24	3	0.170657	1.98694	1.88711	1.84802	1.72667	1.54059	1.79823	1.6089	1.46536	1.49552	1.45077	1.72326	1.65997
CG42240	0.138713	0.0129924	18	15	0.170532	6.67187	6.69858	6.5921	6.60096	6.47412	6.36779	6.87773	6.93356	6.71529	6.48463	6.60524	6.22373
ImpL2	0.138713	0.0129924	24	0	0.16836	5.95129	5.74065	5.85581	5.49451	5.64342	5.66882	5.48186	5.45298	5.61991	5.72653	5.52061	5.87383
CG5793	0.138713	0.0129924	18	12	0.165232	6.4873	6.56867	6.5565	6.59803	6.45796	6.45067	6.74423	6.79017	6.82642	6.30515	6.33269	6.12125
CG13926	0.138713	0.0129924	18	6	0.163778	4.18279	4.21554	4.29773	4.29994	4.2529	4.41441	3.86785	3.8616	3.90823	4.24682	4.26772	4.35587
nimB5	0.138713	0.0129924	24	18	0.162578	4.26831	4.34794	4.33341	4.31335	4.32005	4.35191	4.48827	4.55873	4.45546	4.65107	4.55457	4.65567
pes	0.138713	0.0129924	24	18	0.162209	3.64069	3.71293	3.61011	3.69326	3.58595	3.62906	3.90039	3.86425	3.81582	3.81942	3.93706	3.87627
CG34253	0.138713	0.0129924	24	3	0.161317	2.47629	2.51755	2.61714	2.59586	2.35161	2.49908	2.24295	2.18989	2.23317	2.36307	2.36082	2.36144
Mal-A8	0.138713	0.0129924	24	3	0.159447	7.62486	7.44755	7.64087	7.59461	7.37743	7.40887	7.31449	7.27625	7.35582	7.1636	7.36247	7.28889
Bmcp	0.138713	0.0129924	24	15	0.15671	4.2345	4.17291	4.35994	4.31569	4.36647	4.25712	4.84375	4.85967	4.812	4.32743	4.35622	4.37091
Cyp28d1	0.138713	0.0129924	24	12	0.154817	8.5915	8.54537	8.81008	8.76893	8.87739	8.76665	9.02863	9.02894	9.11108	8.85832	8.72666	8.76204
CG15247	0.138713	0.0129924	24	6	0.153841	4.48535	4.65663	4.63678	4.68327	4.63196	4.65479	4.5293	4.43754	4.38482	4.42924	4.43692	4.38069
CG15152	0.138713	0.0129924	24	15	0.152149	3.92123	3.7967	3.8548	4.04417	3.91042	3.89907	4.29408	4.04346	4.16604	4.08635	4.14214	3.98512
CG8952	0.138713	0.0129924	24	0	0.15062	6.15314	5.99021	6.19058	5.91052	5.79619	5.97663	5.75509	5.78599	5.97877	6.11747	5.99806	6.0661
CaBP1	0.138713	0.0129924	24	3	0.147173	6.22902	6.16844	6.14633	6.22189	6.1282	6.23143	5.79875	5.83745	5.76267	6.11804	6.03779	6.13927
CG32407	0.138713	0.0129924	24	9	0.147017	4.61901	4.70504	4.95747	4.87774	4.91653	4.86768	4.80189	4.72685	4.7819	4.57757	4.56334	4.4977
CG11592	0.138713	0.0129924	24	18	0.143475	3.55141	3.6424	3.55346	3.5736	3.3167	3.45555	3.78313	3.62655	3.63273	3.97728	3.69918	3.75814
CG7460	0.138713	0.0129924	24	15	0.142407	1.83089	1.79383	1.88852	1.92847	1.84001	1.891	2.64041	2.34586	2.42553	1.79401	1.95412	1.99406
Gfat1	0.138713	0.0129924	18	3	0.13962	5.21213	5.25252	5.22729	4.95363	5.12254	4.97223	4.88551	5.02984	4.89095	5.37329	5.16192	5.24423
CG13108	0.138713	0.0129924	24	6	0.137791	2.45645	2.48689	2.60585	2.42117	2.56929	2.62436	2.4052	2.29918	2.36357	2.35319	2.15007	2.35365
CG15556	0.138713	0.0129924	24	15	0.137033	4.73935	4.5331	4.62187	4.77621	4.92729	4.84694	4.96872	5.06593	4.91941	5.02648	4.82868	4.8565
CG11426	0.138713	0.0129924	24	15	0.136141	3.67153	3.54077	3.59777	3.77657	3.64576	3.68951	3.95169	3.83679	3.79495	3.81528	3.85525	3.88293
Cyp12a5	0.138713	0.0129924	24	15	0.134836	5.71801	5.60525	5.6203	5.67377	5.54919	5.60927	5.84325	5.81601	5.84329	5.797	5.77609	5.81549
CG12766	0.138713	0.0129924	18	12	0.133839	5.38988	5.11367	5.07034	5.35457	5.07762	5.2006	5.42539	5.25133	5.71224	4.15701	4.31927	4.42289
Gfr	0.138713	0.0129924	18	3	0.133044	2.85747	2.81248	2.83224	2.66314	2.6923	2.8673	2.66932	2.55038	2.59905	2.96881	2.83792	2.8917
CG7458	0.138713	0.0129924	24	3	0.132675	2.8817	2.73668	2.75518	2.71444	2.66791	2.80696	2.63553	2.52659	2.52888	2.40206	2.65507	2.6154
NtR	0.138713	0.0129924	24	18	0.132487	4.73493	4.86246	4.88026	4.6942	4.81611	4.90418	4.92536	4.8785	4.99166	5.23979	4.99173	5.12036
NC2beta	0.138713	0.0129924	18	6	0.130308	3.89518	4.0276	3.93689	4.08213	4.1029	4.06219	3.89232	3.85798	3.84876	4.07161	3.95194	3.87247
Atx-1	0.138713	0.0129924	24	3	0.127565	1.41805	1.55474	1.61007	1.59235	1.56646	1.47881	1.28262	1.29788	1.34719	1.38658	1.3988	1.46592
CG7787	0.138713	0.0129924	18	3	0.127393	4.06558	4.02235	4.05126	3.9743	4.09495	4.06574	3.82424	3.78032	3.88558	4.33563	4.16335	4.16388
CkIIalpha-i3	0.138713	0.0129924	18	3	0.125156	4.38169	4.41197	4.554	4.44841	4.20803	4.28402	4.16649	4.13779	4.27651	4.47586	4.52774	4.46937
trn	0.138713	0.0129924	18	6	0.12346	2.3613	2.29833	2.45756	2.42744	2.4537	2.40504	2.12733	2.09815	2.17282	2.37401	2.36795	2.40439
CG14634	0.138713	0.0129924	24	6	0.121233	1.28764	1.44518	1.46885	1.33736	1.50963	1.42474	1.35751	1.26909	1.25794	1.1732	1.24187	1.13123
CG42668	0.138713	0.0129924	18	12	0.119016	4.49369	4.48261	4.48591	4.48802	4.50763	4.52642	4.65422	4.71876	4.68904	4.41378	4.47044	4.52143
CG17760	0.138713	0.0129924	24	18	0.118319	2.31939	2.18394	2.17779	2.23967	2.11914	2.29322	2.35011	2.37609	2.37478	2.46182	2.35142	2.4075
CG10133	0.138713	0.0129924	18	3	0.116837	3.26644	3.38179	3.32147	3.29156	3.37519	3.36278	3.16132	3.12071	3.19639	3.37556	3.44706	3.48279
CG9951	0.138713	0.0129924	18	6	0.115801	3.78611	3.76539	3.87723	3.86989	4.02784	3.91559	3.6504	3.72193	3.64928	3.93674	3.91426	3.92693
CG7840	0.138713	0.0129924	24	0	0.115383	3.47708	3.3758	3.37498	3.27608	3.23568	3.40601	3.05852	3.12033	3.16485	3.37474	3.25942	3.31206
CG10082	0.138713	0.0129924	24	15	0.115014	5.40915	5.44129	5.38437	5.37091	5.48338	5.44726	5.66542	5.63583	5.6885	5.41389	5.54553	5.51833
CG5339	0.138713	0.0129924	18	3	0.11488	3.76437	3.64748	3.77082	3.73095	3.68673	3.67128	3.60835	3.41106	3.46277	3.84989	3.70933	3.85103
CG5880	0.138713	0.0129924	24	0	0.113534	2.60293	2.52914	2.69224	2.45947	2.53186	2.54084	2.31053	2.28324	2.33738	2.54104	2.49904	2.56199
UGP	0.138713	0.0129924	18	15	0.113486	8.03979	7.94819	7.95666	7.95217	7.8793	7.8097	8.12443	8.09406	8.14069	7.94653	7.94374	7.78731
CG30497	0.138713	0.0129924	24	12	0.112537	5.07301	4.90983	4.83534	5.09231	4.9659	4.98615	5.22779	5.10277	5.09257	4.83809	4.93476	4.94095
CG5397	0.138713	0.0129924	24	15	0.110168	5.72693	5.89994	5.67826	6.06381	6.14798	6.09128	6.17232	6.15704	6.13195	6.24611	6.12325	6.10837
CG11438	0.138713	0.0129924	24	12	0.109354	2.8293	2.72443	2.75341	2.83318	3.05067	2.89524	2.9902	3.05844	2.94827	2.91902	2.80779	2.80469
CG4723	0.138713	0.0129924	18	6	0.109243	3.84072	3.78469	3.94442	3.95409	3.85663	3.96118	3.62724	3.70214	3.75602	3.90616	3.85379	3.8377
CG31998	0.138713	0.0129924	24	6	0.109	4.85522	4.61104	4.48038	4.64897	4.64026	4.85589	4.51519	4.57044	4.52695	4.43872	4.43152	4.50164
CG4282	0.138713	0.0129924	18	3	0.108029	2.68446	2.62969	2.71359	2.70308	2.60157	2.59773	2.53168	2.44384	2.4972	2.68895	2.70002	2.73523
pncr003:2L	0.138713	0.0129924	24	0	0.108027	5.09068	4.91779	4.98281	4.86008	4.8012	4.83047	4.83976	4.77789	4.71477	4.95815	4.98454	4.84743
CG1774	0.138713	0.0129924	18	0	0.107837	6.05057	6.15538	6.20829	6.00663	5.86059	5.89806	6.05182	5.91011	6.00812	6.06485	6.17217	6.02468
CG17244	0.138713	0.0129924	24	18	0.10743	7.06932	7.13583	7.18552	7.16656	7.12741	7.17741	7.2838	7.17761	7.24339	7.34893	7.32797	7.39026
CG8237	0.138713	0.0129924	18	6	0.107394	3.93202	3.9711	3.92547	4.00389	3.99516	4.05571	3.76844	3.74024	3.80615	4.04591	4.02598	4.04568
CG4716	0.138713	0.0129924	24	0	0.106738	10.4887	10.5308	10.4437	10.4076	10.4399	10.4146	10.1409	10.1338	10.2337	10.5114	10.4634	10.3845
CG3408	0.138713	0.0129924	24	18	0.106404	2.27639	2.33322	2.47021	2.30502	2.30788	2.32816	2.43938	2.38588	2.38974	2.51019	2.55608	2.59512
CG7536	0.138713	0.0129924	24	18	0.106297	3.80912	3.66114	3.7076	3.76596	3.66382	3.64981	3.83237	3.83567	3.87568	3.89162	3.81213	3.90006
CG6404	0.138713	0.0129924	24	0	0.105708	3.81819	3.93118	3.88789	3.76345	3.77783	3.68141	3.72807	3.72205	3.67514	3.91103	3.91155	3.79774
wdn	0.138713	0.0129924	18	6	0.105602	3.23327	3.35099	3.32335	3.37923	3.40405	3.39061	3.18874	3.20664	3.24126	3.3287	3.34344	3.43257
mRpL48	0.138713	0.0129924	18	6	0.105369	4.79162	4.87281	4.80645	4.95546	4.85464	4.90681	4.63783	4.72711	4.70329	4.93216	4.81077	4.79689
CG7530	0.138713	0.0129924	18	15	0.105363	6.22856	6.24554	6.16549	6.17079	6.09653	6.15241	6.41997	6.33469	6.37467	6.19657	6.3147	6.17647
CG13814	0.138713	0.0129924	24	9	0.105288	2.63244	2.6488	2.59088	2.88668	2.7976	2.79101	2.7978	2.66248	2.67615	2.51999	2.65573	2.62929
CG5484	0.138713	0.0129924	18	6	0.104554	4.8018	4.70072	4.82677	4.8494	4.8464	4.8345	4.67898	4.67473	4.65786	4.84936	4.84958	4.84546
hdc	0.138713	0.0129924	24	9	0.103989	2.68585	2.57309	2.49243	2.75579	2.71816	2.67016	2.55707	2.6253	2.60724	2.41058	2.43781	2.50709
CG4164	0.138713	0.0129924	24	3	0.103802	5.24508	5.22179	5.2415	5.25977	5.21068	5.29014	4.97367	5.10449	4.98464	5.11535	5.13847	5.10504
CG1124	0.138713	0.0129924	24	12	0.103758	7.1924	7.24963	7.29182	7.39581	7.34351	7.37463	7.48316	7.46658	7.3746	7.3421	7.23725	7.22787
CG7429	0.138713	0.0129924	18	6	0.103512	3.60837	3.68159	3.67479	3.81479	3.82118	3.74515	3.49591	3.71131	3.58573	3.82775	3.71652	3.7117
oxt	0.138713	0.0129924	18	3	0.103479	3.54366	3.554	3.58036	3.54333	3.5713	3.58894	3.40084	3.31034	3.42496	3.58049	3.60155	3.65136
CG11007	0.138713	0.0129924	18	3	0.10335	3.74662	3.82646	3.91269	3.77552	3.85306	3.77114	3.62936	3.64207	3.64205	3.92154	3.83488	3.98043
Side	0.138713	0.0129924	24	12	0.103259	1.64586	1.77704	1.67986	1.84673	1.69362	1.88605	2.03299	1.89741	2.33348	1.78904	1.859	1.74883
Spn43Ad	0.138713	0.0129924	24	15	0.103202	3.27808	3.49571	3.27172	3.58643	3.4907	3.49703	3.63416	3.58704	3.64547	3.581	3.6889	3.56253
CG15628	0.138713	0.0129924	24	6	0.102757	8.32761	8.35146	8.39801	8.34032	8.35811	8.40383	8.30989	8.26866	8.12853	8.20629	8.14791	8.23118
Myo95E	0.138713	0.0129924	24	6	0.102542	3.30845	3.30198	3.41037	3.34474	3.3685	3.34884	3.18773	3.1987	3.23385	3.16881	3.18407	3.25128
CG10646	0.138713	0.0129924	18	3	0.102009	3.02205	2.96176	2.99994	2.99299	2.9978	3.03176	2.83443	2.7872	2.86538	3.08639	3.02409	3.10762
mri	0.138713	0.0129924	24	15	0.1016	4.28763	4.29498	4.35905	4.35848	4.3844	4.30205	4.4797	4.43061	4.52869	4.46213	4.4912	4.47875
Picot	0.138713	0.0129924	18	12	0.10097	5.66392	5.74392	5.60972	5.64788	5.69463	5.63683	5.83538	5.78235	5.8482	5.58592	5.57113	5.61611
l(1)G0148	0.138713	0.0129924	24	21	0.0998269	4.42604	4.45839	4.30778	4.2091	4.21077	4.25296	4.35452	4.37753	4.3145	4.42726	4.52435	4.40492
CG6503	0.138713	0.0129924	24	6	0.0998224	11.3925	11.4799	11.6197	11.5058	11.5133	11.565	11.3909	11.4249	11.4814	11.3165	11.3349	11.2659
Spase12	0.138713	0.0129924	18	6	0.0994265	6.19332	6.21676	6.26906	6.28462	6.31725	6.36681	6.09407	6.07838	6.17664	6.35951	6.28739	6.4064
CG31659	0.138713	0.0129924	24	0	0.0993858	1.7576	1.52569	1.61451	1.37627	1.4079	1.43084	1.3529	1.3202	1.45591	1.37785	1.51315	1.51367
CG17712	0.138713	0.0129924	18	3	0.0989826	3.3453	3.3699	3.35881	3.35082	3.39431	3.35385	3.10329	3.07057	3.23525	3.44754	3.4062	3.3864
CG9953	0.138713	0.0129924	24	18	0.0982639	6.97872	6.88181	6.86253	6.85876	6.88867	6.87738	7.01188	6.96708	7.02057	7.07769	7.06791	7.00149
snRNP-U1-70K	0.138713	0.0129924	24	6	0.097997	4.29381	4.32801	4.42539	4.37241	4.33992	4.37201	4.24906	4.24308	4.20168	4.13961	4.18439	4.27625
yuri	0.138713	0.0129924	18	12	0.0970866	3.42638	3.18521	3.22237	3.24029	3.19656	3.26097	3.34417	3.35967	3.42728	2.99641	3.10752	3.1391
Su(Tpl)	0.138713	0.0129924	18	12	0.096861	5.05786	5.04868	4.99005	5.11838	5.05417	5.10329	5.28567	5.18566	5.2096	4.92976	5.05115	5.05571
CG9628	0.138713	0.0129924	24	15	0.096832	7.31345	7.31799	7.36903	7.37656	7.47758	7.43919	7.53662	7.53118	7.45675	7.62549	7.49499	7.44858
l(2)k10201	0.138713	0.0129924	18	3	0.0965691	3.16713	3.14648	3.17852	3.07958	3.16307	2.95971	3.11263	2.88401	2.95469	3.25894	3.15735	3.22418
CG8490	0.138713	0.0129924	24	0	0.096356	3.34691	3.28629	3.21222	3.166	3.0863	3.12438	3.0259	3.11508	3.12698	3.30202	3.14606	3.20501
CG10222	0.138713	0.0129924	18	3	0.0963178	2.9278	2.80364	2.96389	2.82092	2.80599	2.86408	2.68452	2.68471	2.78347	3.017	2.84457	2.99884
Grip84	0.138713	0.0129924	18	3	0.0962619	3.32663	3.43931	3.42427	3.36159	3.38358	3.41605	3.24745	3.25282	3.25357	3.4071	3.44723	3.48178
SMSr	0.138713	0.0129924	24	15	0.0962342	3.05582	3.16034	3.2064	3.11293	3.20633	3.21375	3.38894	3.38901	3.33604	3.19042	3.24272	3.29793
isopeptidase-T-3	0.138713	0.0129924	18	6	0.0959021	2.84177	2.79445	2.86158	2.88487	2.9145	2.9338	2.65334	2.71195	2.74924	2.85225	2.82489	2.9386
CG5854	0.138713	0.0129924	24	15	0.0958802	3.79749	3.86882	3.78535	3.85336	3.96311	3.96278	4.07135	3.99216	3.96967	3.98576	4.02813	4.00962
Esyt2	0.138713	0.0129924	18	9	0.0941949	5.3027	5.36067	5.28356	5.44881	5.53238	5.45949	5.37955	5.49388	5.42871	5.21728	5.31158	5.37028
l(3)02640	0.138713	0.0129924	18	15	0.0940362	5.75072	5.50188	5.51924	5.49498	5.44335	5.3907	5.62797	5.60247	5.5987	5.46275	5.50814	5.44993
CG10194	0.138713	0.0129924	24	0	0.0939332	3.78129	3.73711	3.84524	3.60835	3.64169	3.72278	3.62506	3.50207	3.66778	3.75846	3.75734	3.76073
CG34424	0.138713	0.0129924	24	15	0.0938167	6.97327	7.0657	7.0219	7.06761	7.04805	7.00426	7.40371	7.21459	7.34424	7.02986	7.12618	7.08973
CG7685	0.138713	0.0129924	18	6	0.0935881	3.34843	3.35908	3.32027	3.51521	3.49007	3.466	3.3499	3.35772	3.25647	3.48332	3.44823	3.47784
CG2162	0.138713	0.0129924	24	9	0.0935804	4.64566	4.76158	4.7294	4.76702	4.77834	4.76825	4.75977	4.7134	4.78615	4.54203	4.51713	4.56474
SmD1	0.138713	0.0129924	18	3	0.0932683	3.61236	3.57233	3.63656	3.6717	3.5898	3.59857	3.50466	3.45411	3.28875	3.69338	3.67715	3.6658
ArfGAP3	0.138713	0.0129924	24	3	0.093255	4.77655	4.68381	4.80879	4.73698	4.68797	4.74072	4.55999	4.57261	4.54006	4.57812	4.67454	4.73849
Ent2	0.138713	0.0129924	24	18	0.0928458	4.48319	4.46094	4.40319	4.4279	4.38697	4.36221	4.55513	4.49258	4.38756	4.64785	4.64162	4.55408
mu2	0.138713	0.0129924	24	3	0.0924216	2.11275	2.05577	2.16652	2.05446	2.08707	2.09935	1.84095	1.92311	1.90342	2.06171	1.97534	2.0757
Cep135	0.138713	0.0129924	18	6	0.0923453	2.46246	2.45577	2.50942	2.57545	2.68884	2.49087	2.34545	2.45963	2.35745	2.61041	2.51683	2.52124
Pcf11	0.138713	0.0129924	24	6	0.0915116	5.06202	5.04868	5.10228	5.09875	5.09961	5.12716	4.93149	4.98922	4.98454	4.88854	4.95562	4.99886
CG14830	0.138713	0.0129924	24	6	0.0913036	4.50678	4.5831	4.64179	4.58915	4.72217	4.6612	4.49838	4.59434	4.52548	4.49966	4.43136	4.39645
CG42237	0.138713	0.0129924	24	3	0.0912996	1.68423	1.45336	1.52688	1.5262	1.5789	1.43833	1.3567	1.39806	1.36431	1.41574	1.50732	1.39196
Crc	0.138713	0.0129924	18	6	0.0910089	8.67399	8.66333	8.60955	8.71536	8.69455	8.71233	8.51432	8.55181	8.45432	8.73552	8.64887	8.69579
Rgk3	0.138713	0.0129924	24	6	0.0902386	5.35958	5.39548	5.43423	5.39876	5.40786	5.4826	5.32867	5.29889	5.22895	5.27416	5.24365	5.31537
RhoGAP68F	0.138713	0.0129924	24	18	0.0886462	5.03458	5.12381	5.08144	5.08214	5.04504	5.08183	5.13172	5.10288	5.1997	5.207	5.26262	5.3038
Cyp6a13	0.138713	0.0129924	24	18	0.0885583	5.25795	5.27748	5.10873	5.25394	5.23488	5.1836	5.25387	5.31088	5.32312	5.44194	5.54249	5.32659
CG11267	0.138713	0.0129924	18	3	0.0875439	7.22783	7.28992	7.42009	7.23234	7.18793	7.23307	7.06467	7.10402	7.21021	7.40915	7.32359	7.35663
CG17328	0.138713	0.0129924	18	6	0.0870796	2.42775	2.46439	2.44338	2.50658	2.47532	2.55609	2.21531	2.3606	2.31628	2.5358	2.50863	2.54419
Uch-L3	0.138713	0.0129924	18	3	0.0869398	3.64157	3.61007	3.56396	3.69072	3.58044	3.59115	3.43703	3.48712	3.49814	3.8062	3.64645	3.74902
Glut4EF	0.138713	0.0129924	18	12	0.08678	3.56677	3.47993	3.44405	3.60856	3.47229	3.55964	3.67635	3.68379	3.61875	3.50409	3.44137	3.41846
CG12848	0.138713	0.0129924	18	3	0.0866967	5.70572	5.80376	5.83708	5.79315	5.72946	5.75901	5.60862	5.55396	5.71447	5.92546	5.8407	5.7978
CG11396	0.138713	0.0129924	18	3	0.0866385	3.717	3.78218	3.72711	3.78852	3.67707	3.72706	3.52861	3.61217	3.60453	3.87119	3.74913	3.7967
CG11970	0.138713	0.0129924	18	6	0.0859317	3.25378	3.25178	3.33238	3.33467	3.45027	3.36784	3.17436	3.15141	3.24632	3.19573	3.30607	3.3606
CG3709	0.138713	0.0129924	18	3	0.0857795	2.80811	2.70439	2.71776	2.71003	2.68284	2.73416	2.60665	2.58308	2.57123	2.73652	2.78754	2.7759
RhoGAP19D	0.138713	0.0129924	18	15	0.085282	3.27809	3.26816	3.30019	3.20262	3.14837	3.2393	3.42854	3.3599	3.34386	3.02069	3.15205	3.23838
CG2909	0.138713	0.0129924	24	15	0.0845016	2.87239	2.91866	2.92586	2.98288	2.92285	2.94397	3.13294	3.19869	3.16216	2.88183	3.0033	3.0126
PDCD-5	0.138713	0.0129924	18	6	0.0841649	5.87222	5.98603	6.00147	6.01589	6.11356	6.09137	5.92228	5.92526	5.91324	6.0912	6.03677	6.08445
Tango6	0.138713	0.0129924	18	3	0.0841211	3.05589	2.95862	3.06165	3.05271	3.08296	3.0457	2.82854	2.95156	2.89959	3.1264	3.07602	3.08336
CG3603	0.138713	0.0129924	18	15	0.0838816	3.97098	3.91961	3.9527	3.83407	3.85893	3.82023	4.03521	4.02655	3.92389	3.89111	3.88414	3.97724
p16-ARC	0.138713	0.0129924	18	3	0.0828843	5.00985	5.05045	5.0589	4.89944	5.04114	5.0045	4.91327	4.87996	4.9194	5.07337	5.03896	5.11206
CG9248	0.138713	0.0129924	24	21	0.0826219	4.55231	4.5336	4.58203	4.44103	4.46476	4.42833	4.52234	4.45399	4.45904	4.51725	4.60553	4.64591
CG17259	0.138713	0.0129924	18	3	0.0823911	4.99888	4.93839	4.88404	4.96808	4.84626	4.95122	4.81784	4.81091	4.83886	4.96625	5.01821	5.10483
CoRest	0.138713	0.0129924	18	15	0.0822431	3.57435	3.62783	3.62554	3.57114	3.55648	3.53706	3.79303	3.82515	3.65628	3.46851	3.52925	3.57328
CG13728	0.138713	0.0129924	24	3	0.0814953	1.89413	2.00854	1.95262	1.90472	1.83014	1.92295	1.68585	1.65706	1.77601	1.84812	1.90018	1.88574
SmF	0.138713	0.0129924	18	6	0.0814627	4.09138	4.15145	4.10588	4.17892	4.15076	4.39289	4.00893	4.00518	4.03706	4.3653	4.15261	4.21427
schlank	0.138713	0.0129924	24	15	0.0812021	4.36601	4.34793	4.33979	4.22898	4.3778	4.36315	4.49576	4.44706	4.51255	4.48079	4.41056	4.44732
CG9922	0.138713	0.0129924	24	0	0.0809773	4.26835	4.18987	4.20968	4.13719	4.07695	4.15367	3.89527	4.09532	3.99037	4.20716	4.06892	4.15618
CG9153	0.138713	0.0129924	24	3	0.0802071	5.33769	5.35029	5.35685	5.36889	5.31049	5.31637	5.11381	5.15827	5.23699	5.20082	5.33383	5.30522
CG5039	0.138713	0.0129924	18	3	0.0798182	3.24036	3.10646	3.36345	3.11287	3.09349	3.15976	2.98061	3.085	3.05859	3.30214	3.182	3.30994
CG15771	0.138713	0.0129924	18	15	0.0794244	5.56164	5.62379	5.6022	5.55611	5.46166	5.51118	5.67397	5.61964	5.70246	5.58018	5.62071	5.53945
Rrp46	0.138713	0.0129924	18	3	0.0794181	3.30672	3.28823	3.15087	3.26913	3.29441	3.18168	3.11682	3.1944	3.07953	3.40847	3.35257	3.34649
Ppt2	0.138713	0.0129924	24	15	0.0791068	5.79147	5.73564	5.72142	5.82205	5.77972	5.73825	5.84563	5.86817	5.90823	5.96133	5.8516	5.82558
crb	0.138713	0.0129924	24	15	0.0790885	3.48023	3.58903	3.55893	3.57631	3.60127	3.60941	3.76661	3.72337	3.85091	3.49082	3.66679	3.64639
CG12173	0.138713	0.0129924	18	0	0.0788143	4.70998	4.64406	4.63349	4.55077	4.497	4.4845	4.56765	4.52203	4.62828	4.59371	4.57755	4.54921
scf	0.138713	0.0129924	18	3	0.0780592	5.34254	5.45829	5.44304	5.50376	5.30589	5.41515	5.32408	5.30504	5.32001	5.6425	5.59365	5.72585
CG32442	0.138713	0.0129924	18	0	0.0767653	4.02398	3.95532	3.99311	3.89251	3.84675	3.81887	3.85253	3.91494	3.86069	4.05789	3.95833	3.92311
Nop17l	0.138713	0.0129924	24	0	0.0767584	4.84661	4.76567	4.77824	4.67162	4.73109	4.8001	4.51625	4.48469	4.62166	4.75341	4.71944	4.73214
Arp14D	0.138713	0.0129924	24	15	0.0762504	4.48765	4.48076	4.48948	4.52704	4.52611	4.52102	4.59459	4.60628	4.59592	4.65272	4.57149	4.69354
CG2118	0.138713	0.0129924	18	0	0.0756567	3.61136	3.50271	3.53811	3.42089	3.36063	3.40329	3.47592	3.42379	3.52789	3.49967	3.50904	3.58715
MESR6	0.138713	0.0129924	18	6	0.0753436	4.46175	4.44058	4.35579	4.47754	4.51125	4.5365	4.35731	4.40469	4.36042	4.46706	4.50254	4.53351
trus	0.138713	0.0129924	18	6	0.0753139	3.3461	3.38773	3.41524	3.46041	3.49538	3.38772	3.28818	3.2363	3.32638	3.45194	3.38257	3.42668
rap	0.138713	0.0129924	24	15	0.0750761	3.84082	3.89596	3.8558	3.91403	3.88158	3.86834	3.98539	4.03543	3.92843	3.96277	3.99354	3.98262
CG9986	0.138713	0.0129924	18	3	0.0747614	2.78742	2.74396	2.72798	2.7255	2.72982	2.63824	2.47473	2.51369	2.69318	2.77694	2.76543	2.74266
Vang	0.138713	0.0129924	18	6	0.0745264	2.66415	2.61994	2.66002	2.72985	2.70488	2.76542	2.57152	2.56191	2.61933	2.59666	2.63498	2.68219
Gtp-bp	0.138713	0.0129924	18	6	0.0742985	5.2377	5.30273	5.24236	5.34462	5.26586	5.34351	5.16079	5.14545	5.15816	5.25621	5.33168	5.41572
CG6015	0.138713	0.0129924	18	6	0.0741059	4.17482	4.24369	4.22918	4.32867	4.32074	4.2932	4.19874	4.16856	4.1884	4.31953	4.2535	4.34057
Snr1	0.138713	0.0129924	18	3	0.0730573	4.14268	4.20609	4.09353	4.1066	4.15105	4.13962	3.9927	4.02566	4.04314	4.23205	4.16666	4.20559
su(w[a])	0.138713	0.0129924	24	6	0.0728008	5.24479	5.3319	5.33151	5.27189	5.33784	5.3339	5.22867	5.17516	5.26151	5.09683	5.16027	5.24514
CG4858	0.138713	0.0129924	24	18	0.0725192	5.39125	5.43397	5.48332	5.39479	5.39716	5.44207	5.45863	5.51508	5.47185	5.61304	5.52107	5.58485
CG34375	0.138713	0.0129924	24	6	0.0723883	1.53086	1.49503	1.56496	1.47502	1.50669	1.59523	1.44568	1.46279	1.49266	1.36337	1.42576	1.39206
CG32694	0.138713	0.0129924	24	6	0.0722254	4.36797	4.28351	4.27779	4.28945	4.44545	4.32573	4.2268	4.34169	4.24182	4.19752	4.1826	4.12642
Ssadh	0.138713	0.0129924	24	12	0.0717	6.29119	6.37337	6.32686	6.47016	6.43088	6.4046	6.56854	6.4717	6.47796	6.47722	6.40807	6.33363
CG11898	0.138713	0.0129924	24	0	0.0712854	1.70661	1.56512	1.63876	1.49665	1.53567	1.58582	1.47822	1.48353	1.39359	1.58527	1.57811	1.54434
CG1227	0.138713	0.0129924	24	3	0.0711927	3.57685	3.49683	3.52233	3.49402	3.46353	3.45969	3.28997	3.38861	3.33876	3.59155	3.44909	3.39713
CG11537	0.138713	0.0129924	18	12	0.0706687	4.34696	4.27464	4.32727	4.40575	4.33131	4.3976	4.43864	4.43126	4.47737	4.22511	4.3021	4.35758
Sac1	0.138713	0.0129924	18	6	0.0705378	4.95514	5.02878	5.01402	5.0232	5.13528	5.08427	4.9404	4.89313	4.97812	5.06615	5.02789	5.05781
CG8870	0.138713	0.0129924	18	3	0.0696484	1.77233	1.73207	1.83884	1.81221	1.77359	1.71928	1.69393	1.63884	1.66021	1.79307	1.85562	1.85612
lok	0.138713	0.0129924	18	3	0.0692718	3.01356	2.90238	2.97107	3.00035	2.98561	2.94271	2.85614	2.90673	2.77148	3.10997	3.09146	3.04379
CG13204	0.138713	0.0129924	24	12	0.0690677	2.76391	2.87797	2.82183	2.95346	2.95639	2.92616	2.99546	2.89045	3.0371	2.89915	2.85945	2.89379
CG15643	0.138713	0.0129924	18	6	0.0686521	2.29405	2.33048	2.3483	2.37182	2.35513	2.45734	2.20214	2.27473	2.24573	2.3765	2.37783	2.38029
CG3033	0.138713	0.0129924	18	6	0.0684221	3.7743	3.83763	3.80329	3.88039	3.90806	3.93507	3.7664	3.81242	3.8113	3.83346	3.89696	3.87271
CG13426	0.138713	0.0129924	24	6	0.068374	1.26098	1.23513	1.32525	1.44123	1.4578	1.33061	1.23758	1.39725	1.22965	1.23453	1.21446	1.22793
CG10673	0.138713	0.0129924	18	3	0.0681763	4.50595	4.69817	4.57567	4.55362	4.48566	4.60737	4.51095	4.43468	4.45552	4.63172	4.70625	4.72634
CG12877	0.138713	0.0129924	18	6	0.0672988	3.85243	3.90513	3.85269	3.91372	3.97108	3.89932	3.76628	3.80414	3.80511	3.91899	3.87986	3.90194
ltl	0.138713	0.0129924	24	15	0.067262	4.69177	4.5987	4.55331	4.69005	4.72178	4.69672	4.7007	4.75853	4.84566	4.75767	4.78475	4.70068
CG42542	0.138713	0.0129924	18	15	0.066385	4.98593	5.00446	5.02917	4.91225	4.91471	4.89205	5.01021	5.07231	5.00121	4.87467	4.94837	4.93119
Taf10	0.138713	0.0129924	18	6	0.0659671	5.84669	5.87677	5.84593	5.94147	5.9351	5.97006	5.8483	5.80521	5.81119	6.01731	5.87756	5.86015
Afti	0.138713	0.0129924	24	6	0.0658717	3.14429	3.16388	3.16135	3.1943	3.14654	3.23692	3.04879	3.07569	3.13769	3.04019	3.09899	3.08371
Rac2	0.138713	0.0129924	24	15	0.0654466	5.56805	5.50519	5.46923	5.49427	5.61011	5.57409	5.69816	5.66161	5.67495	5.62939	5.57879	5.51153
tilB	0.138713	0.0129924	24	18	0.0651238	1.485	1.41062	1.4498	1.37637	1.41625	1.47827	1.54232	1.52541	1.50793	1.55429	1.49559	1.5502
Hr78	0.138713	0.0129924	18	6	0.0650277	5.1517	5.11573	5.17172	5.1689	5.22439	5.23537	5.03639	5.09617	5.07694	5.24143	5.15683	5.20271
exo70	0.138713	0.0129924	18	3	0.0649339	3.48603	3.47967	3.45771	3.45094	3.51093	3.49321	3.33247	3.38995	3.38784	3.54991	3.52399	3.51878
CG33096	0.138713	0.0129924	18	6	0.0647723	3.12162	2.99558	3.12506	3.21017	3.1444	3.14279	3.05119	3.07257	2.99264	3.19986	3.14226	3.15881
Ets97D	0.138713	0.0129924	18	3	0.0643105	3.23819	3.23574	3.24016	3.22754	3.27661	3.27174	3.14724	3.13236	3.14936	3.42563	3.32664	3.31989
CG14711	0.138713	0.0129924	18	3	0.0640526	3.63385	3.66966	3.6707	3.62838	3.65671	3.66435	3.56814	3.4674	3.57377	3.72458	3.67199	3.63507
CG9740	0.138713	0.0129924	18	3	0.0639625	4.12162	4.15799	4.1731	4.11854	4.16503	4.07408	4.03615	4.02122	4.07413	4.24126	4.19422	4.13657
Pdi	0.138713	0.0129924	18	9	0.0638799	7.94732	7.94523	7.93403	8.12755	8.03766	8.09104	8.00681	7.987	7.92772	7.98312	7.94798	7.95287
CG8494	0.138713	0.0129924	24	3	0.0637385	3.45386	3.40879	3.37922	3.37384	3.42314	3.32991	3.29987	3.25413	3.26838	3.27234	3.36258	3.37846
Ucp4A	0.138713	0.0129924	24	15	0.063683	6.03661	6.11404	6.08238	6.16637	6.13363	6.14112	6.26688	6.19614	6.14831	6.19383	6.29614	6.16871
CG6791	0.138713	0.0129924	18	6	0.0635493	4.09746	4.14174	4.06668	4.15655	4.11109	4.17757	3.9662	4.05946	3.99423	4.08534	4.10902	4.11956
Syx4	0.138713	0.0129924	18	12	0.0635004	3.6563	3.53955	3.62248	3.61546	3.53963	3.54989	3.69448	3.71228	3.67345	3.27468	3.28013	3.25189
escl	0.138713	0.0129924	18	3	0.0633141	2.40588	2.35455	2.37894	2.36554	2.2776	2.25566	2.2894	2.22173	2.26098	2.42546	2.38887	2.40041
sr	0.138713	0.0129924	18	12	0.0632326	2.34619	2.33432	2.31148	2.25119	2.3604	2.42312	2.39708	2.50809	2.44978	2.22851	2.23904	2.32592
CG5846	0.138713	0.0129924	18	3	0.0631201	3.83977	3.93525	3.81379	3.8211	3.83189	3.86473	3.72845	3.80834	3.72452	4.02537	3.91498	3.90699
CG10508	0.138713	0.0129924	24	12	0.0628684	3.2042	3.24412	3.28264	3.22267	3.38486	3.32907	3.38836	3.47793	3.42001	3.3671	3.32188	3.30284
tun	0.138713	0.0129924	18	6	0.062815	3.44503	3.40105	3.50047	3.47638	3.52921	3.52493	3.35739	3.34863	3.39674	3.45162	3.41111	3.48965
vn	0.138713	0.0129924	24	6	0.0627044	2.36004	2.46146	2.49471	2.55698	2.50618	2.61654	2.41874	2.42371	2.46116	2.39267	2.37969	2.37376
scu	0.138713	0.0129924	18	12	0.0624991	7.19243	7.28663	7.23638	7.35306	7.22909	7.24167	7.35093	7.33535	7.29932	7.18176	7.17782	7.14546
Smc5	0.138713	0.0129924	24	3	0.0623309	2.54849	2.56148	2.53437	2.56525	2.54423	2.53327	2.37641	2.4511	2.45539	2.50289	2.44512	2.52028
Drep-3	0.138713	0.0129924	18	0	0.0616265	2.07875	2.16263	2.19472	2.01056	1.93344	2.07244	2.07548	2.04479	2.13927	2.14778	2.1471	2.08899
Cyp305a1	0.138713	0.0129924	18	12	0.0611954	5.93329	5.85739	6.09384	6.00707	6.34953	6.11319	6.12055	6.19973	6.04927	5.80335	5.57189	5.53139
in	0.138713	0.0129924	24	15	0.0601636	1.85506	1.78274	1.88444	1.86217	1.91619	1.853	1.93616	2.04363	1.93911	1.99716	1.92527	1.90962
CG31445	0.138713	0.0129924	24	15	0.0599913	5.1469	5.13144	5.11339	5.16175	5.20235	5.17443	5.24662	5.18969	5.27116	5.20369	5.25753	5.26462
CG30381	0.138713	0.0129924	24	21	0.0597767	2.87874	2.92062	2.92982	2.86049	2.88799	2.86798	2.91908	2.79403	2.86946	3.06517	3.00345	2.9944
CG11454	0.138713	0.0129924	18	3	0.0593227	5.11318	5.2075	5.15362	5.17923	5.17928	5.17271	5.06571	5.09538	5.07872	5.29036	5.24503	5.2709
CG7598	0.138713	0.0129924	18	3	0.0584142	5.93973	6.07686	6.07715	6.07164	5.97512	6.05622	5.97301	5.91771	5.99425	6.22739	6.11276	6.08337
CG5510	0.138713	0.0129924	18	3	0.0581699	5.06926	5.06907	5.08763	5.04665	5.11717	5.14111	4.96439	4.99514	5.0207	5.20879	5.18721	5.24147
CG6744	0.138713	0.0129924	18	3	0.0579617	3.65756	3.61653	3.67615	3.67275	3.60365	3.60012	3.59985	3.48036	3.52484	3.60616	3.68761	3.80324
Eogt	0.138713	0.0129924	18	3	0.057935	3.46143	3.41202	3.51609	3.41592	3.4778	3.50958	3.36927	3.33602	3.41224	3.55223	3.54043	3.56178
CG10466	0.138713	0.0129924	18	3	0.0572339	3.29393	3.26137	3.32011	3.23683	3.31611	3.39492	3.1889	3.25735	3.17945	3.44503	3.43987	3.45554
CG7630	0.138713	0.0129924	18	3	0.0569037	10.3387	10.4461	10.5143	10.3926	10.3245	10.3351	10.2832	10.3121	10.3097	10.6087	10.4163	10.3407
Deaf1	0.138713	0.0129924	24	6	0.0564231	3.76631	3.81466	3.84747	3.7862	3.82607	3.83027	3.75089	3.75006	3.79475	3.63493	3.72774	3.71098
Nedd4	0.138713	0.0129924	24	12	0.0564046	4.9024	4.87202	4.8888	4.98051	4.96582	4.97517	4.94075	5.05615	4.98733	4.96096	4.88399	4.91256
CG1129	0.138713	0.0129924	18	6	0.0563928	4.83943	4.77013	4.75885	4.9073	4.79071	4.8415	4.70279	4.71096	4.715	4.7809	4.82679	4.85981
Pp2A-29B	0.138713	0.0129924	24	18	0.0561301	6.48658	6.57249	6.51551	6.49552	6.55187	6.5384	6.57393	6.55986	6.59324	6.61749	6.65177	6.67475
ihog	0.138713	0.0129924	18	6	0.0561241	1.93914	1.94036	1.85966	2.01237	1.96088	1.8957	1.8086	1.85977	1.81667	1.95544	1.94853	1.95832
CG15107	0.138713	0.0129924	24	18	0.0558056	2.94949	3.11309	2.97795	2.92427	2.78136	2.93636	2.98226	3.03443	2.98026	3.03667	3.04374	3.04189
rab3-GAP	0.138713	0.0129924	18	3	0.055541	3.21562	3.2192	3.18989	3.16378	3.18031	3.07887	3.11134	3.04664	3.11429	3.18339	3.2159	3.31756
Brf	0.138713	0.0129924	18	6	0.0554867	3.3208	3.29403	3.28433	3.33195	3.3628	3.30367	3.16327	3.10036	3.27262	3.31487	3.29731	3.33243
CG32043	0.138713	0.0129924	24	9	0.0552422	3.4864	3.52562	3.57174	3.54195	3.63348	3.60875	3.58466	3.60359	3.59065	3.51318	3.48418	3.52531
Apc10	0.138713	0.0129924	18	3	0.0549775	3.64382	3.80445	3.61494	3.60341	3.70031	3.6035	3.52091	3.59737	3.58225	3.78313	3.68687	3.72889
Dip1	0.138713	0.0129924	24	0	0.0543319	2.61116	2.63443	2.61629	2.49447	2.45249	2.6112	2.49053	2.43726	2.48084	2.51551	2.51937	2.50079
CR18166	0.138713	0.0129924	18	3	0.0536222	2.83102	2.83277	2.91063	2.79102	2.78809	2.86092	2.71953	2.75693	2.76685	2.87499	2.83684	2.88162
qtc	0.138713	0.0129924	24	15	0.0529797	4.1312	4.21521	4.18949	4.24305	4.25729	4.29025	4.34393	4.25822	4.40566	4.24479	4.24715	4.32588
ChLD3	0.138713	0.0129924	18	3	0.0528743	1.63252	1.67152	1.69129	1.60009	1.62326	1.64853	1.54848	1.49502	1.60816	1.65808	1.65165	1.69444
CG11723	0.138713	0.0129924	18	3	0.0525677	3.75073	3.72932	3.82328	3.82234	3.77896	3.78353	3.71546	3.70919	3.60866	3.89428	3.86007	3.95722
Ric	0.138713	0.0129924	24	6	0.0520423	5.47506	5.49962	5.53555	5.54289	5.54352	5.53049	5.43412	5.47519	5.46488	5.49907	5.40076	5.39425
Synd	0.138713	0.0129924	24	15	0.0520289	5.81285	5.77579	5.79667	5.8214	5.85177	5.80825	5.88548	5.86132	5.90091	5.93454	5.8824	5.86194
CG3436	0.138713	0.0129924	24	21	0.051581	4.6584	4.71159	4.67953	4.65408	4.61346	4.59551	4.60697	4.63763	4.62867	4.74612	4.702	4.68282
TepIV	0.138713	0.0129924	18	12	0.0513631	7.19732	7.15724	7.07311	7.19356	7.2604	7.11641	7.26137	7.32423	7.15814	6.97236	6.98373	6.86072
Gmer	0.138713	0.0129924	24	3	0.0511209	3.08671	3.03506	3.11733	2.99189	3.03262	3.08525	2.90546	2.96279	2.8639	3.06641	3.01582	3.01533
rdgBbeta	0.138713	0.0129924	18	3	0.0511174	3.09912	3.06667	3.09205	2.90838	3.02413	3.00925	2.901	2.95047	3.05526	3.25372	3.08131	3.18801
CG30291	0.138713	0.0129924	24	3	0.0508258	4.58756	4.62505	4.61659	4.58229	4.7134	4.60318	4.49459	4.52618	4.48894	4.57953	4.55867	4.60219
CG11695	0.138713	0.0129924	18	3	0.0507619	3.74765	3.85003	3.86654	3.81565	3.85216	3.83207	3.67414	3.78037	3.76228	3.93681	3.88102	3.93236
CG32758	0.138713	0.0129924	24	12	0.0506214	3.61579	3.66382	3.58856	3.68569	3.65247	3.68907	3.84622	3.7839	3.72228	3.68329	3.6453	3.70313
ldlCp	0.138713	0.0129924	24	0	0.0503138	3.49691	3.51564	3.47246	3.46541	3.46858	3.46523	3.25824	3.29828	3.23687	3.47561	3.43668	3.50176
Kat60	0.138713	0.0129924	18	9	0.0502121	4.16312	4.22726	4.19273	4.26374	4.311	4.27321	4.28949	4.24568	4.29735	4.1935	4.26233	4.24498
CG17840	0.138713	0.0129924	18	3	0.0499856	2.99385	3.02744	3.06345	3.01323	2.96173	2.95449	2.87476	2.94126	2.95556	2.99967	3.04535	3.09838
CG5114	0.138713	0.0129924	18	3	0.0498597	3.93122	3.98561	3.97731	3.80209	3.94199	3.89507	3.86071	3.82829	3.8903	3.98738	3.94485	4.09592
rnh1	0.138713	0.0129924	24	3	0.0498115	4.24688	4.27746	4.34056	4.19181	4.17828	4.22117	4.15508	4.15261	4.21665	4.17207	4.15348	4.17065
Dl	0.138713	0.0129924	18	6	0.0496435	1.80455	1.76025	1.76078	1.83765	1.82652	1.87577	1.71219	1.75632	1.76374	1.92825	1.79492	1.80808
CdsA	0.138713	0.0129924	24	15	0.049262	5.38373	5.31831	5.40115	5.38529	5.39785	5.37677	5.44927	5.45187	5.6687	5.52713	5.4069	5.40866
Pep	0.138713	0.0129924	24	6	0.0482863	6.44693	6.53806	6.54007	6.54478	6.62182	6.60353	6.47743	6.52193	6.48119	6.42546	6.43015	6.51955
CG34367	0.138713	0.0129924	18	0	0.0478475	1.50021	1.52588	1.55943	1.45822	1.45011	1.37743	1.48732	1.45212	1.44426	1.51063	1.4584	1.50316
nclb	0.138713	0.0129924	18	6	0.0476156	4.33735	4.33409	4.36534	4.34705	4.40142	4.38597	4.29637	4.23964	4.23925	4.38513	4.37507	4.59865
CG6153	0.138713	0.0129924	18	3	0.0475234	4.2981	4.19929	4.32891	4.2796	4.17152	4.23716	4.13888	4.2124	4.1844	4.35346	4.32561	4.37829
CG12769	0.138713	0.0129924	24	12	0.0473939	2.09914	2.17814	2.0391	2.23105	2.18867	2.21879	2.30635	2.22285	2.27844	2.17819	2.20367	2.24119
CG10399	0.138713	0.0129924	24	3	0.046848	3.99926	4.06857	4.05488	3.95779	3.95212	3.97963	3.94117	3.83248	3.95683	3.93747	3.90522	3.94837
BM-40-SPARC	0.138713	0.0129924	18	3	0.0467878	7.35621	7.50326	7.45853	7.34314	7.33686	7.41095	7.4112	7.34214	7.2707	7.6739	7.51573	7.66899
Pp1alpha-96A	0.138713	0.0129924	24	12	0.0459016	6.50103	6.4641	6.39952	6.59192	6.58665	6.56296	6.65247	6.60291	6.61354	6.57796	6.63124	6.56052
CG10543	0.138713	0.0129924	24	9	0.0458243	3.9119	3.94783	3.90292	3.95703	3.9301	3.96162	3.97848	3.92584	3.92939	3.75832	3.85978	3.86433
CG18600	0.138713	0.0129924	18	3	0.0457967	3.48005	3.56328	3.52022	3.48224	3.42911	3.55002	3.38143	3.51047	3.41747	3.58356	3.5732	3.64457
Cnot4	0.138713	0.0129924	24	9	0.0456696	5.97227	5.96194	5.98429	6.02364	6.0293	6.02508	5.99812	6.03383	5.9514	5.92031	5.93408	5.90917
CG8270	0.138713	0.0129924	18	3	0.0450264	3.34242	3.28097	3.35923	3.2341	3.31637	3.32224	3.14876	3.22178	3.30099	3.40751	3.32555	3.3702
CG42458	0.138713	0.0129924	18	12	0.0448994	2.22441	2.35324	2.29943	2.30705	2.26978	2.35158	2.41245	2.35743	2.3647	2.22062	2.24977	2.23694
Su(var)2-HP2	0.138713	0.0129924	24	6	0.0447802	2.98805	2.96468	2.97112	3.04201	2.9786	3.06656	2.96683	2.92956	2.92574	2.85239	2.93213	2.96101
CG11486	0.138713	0.0129924	24	6	0.0442187	5.5174	5.52596	5.47371	5.53078	5.51106	5.54671	5.52165	5.46997	5.50623	5.37874	5.40836	5.43636
CG12304	0.138713	0.0129924	18	3	0.0441327	5.79727	5.82245	5.8068	5.74863	5.81675	5.85302	5.7394	5.68319	5.78078	5.947	5.94647	5.93291
CG32676	0.138713	0.0129924	24	9	0.0439668	3.87924	3.85465	3.82656	3.86706	3.90164	3.91022	3.87554	3.87791	3.88077	3.63007	3.81455	3.79838
sfl	0.138713	0.0129924	18	15	0.0436984	3.20386	3.15733	3.19299	3.15315	3.08589	3.16194	3.26361	3.22491	3.21913	3.19821	3.1452	3.18565
CG8202	0.138713	0.0129924	18	6	0.0435272	3.15862	3.15009	3.17375	3.1926	3.18994	3.17841	3.03018	3.08594	3.11931	3.1932	3.17393	3.25384
chico	0.138713	0.0129924	24	18	0.0433962	4.64596	4.64926	4.65381	4.60163	4.72309	4.644	4.67467	4.6763	4.66306	4.78864	4.73496	4.73679
cm	0.138713	0.0129924	18	3	0.0433737	3.41078	3.42234	3.45338	3.42701	3.44258	3.43186	3.36567	3.36605	3.32962	3.47888	3.48008	3.53008
CG4558	0.138713	0.0129924	18	3	0.0433562	3.3235	3.43862	3.39724	3.35696	3.38701	3.39967	3.34593	3.31426	3.31349	3.45939	3.40514	3.48475
sina	0.138713	0.0129924	24	15	0.0430067	3.68665	3.67751	3.73442	3.72149	3.74964	3.68685	3.79529	3.75509	3.8063	3.72454	3.763	3.76888
geminin	0.138713	0.0129924	18	3	0.0428251	4.41899	4.55161	4.51031	4.49821	4.53051	4.5067	4.50123	4.41655	4.37329	4.68354	4.61443	4.64864
SMC1	0.138713	0.0129924	18	6	0.0415361	4.22524	4.20958	4.21655	4.24992	4.22602	4.25187	4.13925	4.17969	4.12785	4.27434	4.21914	4.25147
CG7357	0.138713	0.0129924	18	3	0.041505	3.95412	4.008	3.97061	4.05345	4.02811	3.94632	3.94088	3.93413	3.94351	4.21049	4.0752	4.11985
px	0.138713	0.0129924	18	12	0.0402291	3.4295	3.50231	3.47163	3.48008	3.48244	3.53088	3.53079	3.54971	3.55817	3.28277	3.44892	3.47674
CG4332	0.138713	0.0129924	18	3	0.0394603	2.91519	2.8646	2.89798	2.85543	2.92957	2.86179	2.87333	2.8105	2.78935	3.02419	2.94196	2.93755
tomboy40	0.138713	0.0129924	18	6	0.0393395	1.16564	1.13064	1.1172	1.22911	1.19636	1.16265	1.11087	1.14546	1.10701	1.17023	1.14701	1.15956
cact	0.138713	0.0129924	18	12	0.039058	5.96763	6.0415	6.04541	6.00243	6.04259	6.02012	6.09783	6.06362	6.07827	5.98029	5.95442	5.93165
CG33052	0.138713	0.0129924	18	3	0.0389729	3.47669	3.55202	3.53132	3.51695	3.5663	3.50204	3.45865	3.4969	3.44644	3.59539	3.60718	3.57376
CG14619	0.138713	0.0129924	24	6	0.0389256	4.83257	4.87244	4.88833	4.90201	4.8841	4.89893	4.88523	4.86557	4.85712	4.77081	4.77334	4.80522
UbcD4	0.138713	0.0129924	18	3	0.0385141	6.06649	6.17581	6.11735	6.12216	6.12727	6.05807	6.04794	6.0523	6.0782	6.28014	6.27372	6.1839
CG12106	0.138713	0.0129924	18	3	0.038269	2.47497	2.52302	2.58094	2.48774	2.46313	2.42432	2.43774	2.43568	2.37536	2.57022	2.57383	2.57869
Ac76E	0.138713	0.0129924	24	12	0.0380243	4.6521	4.67288	4.65293	4.67973	4.69696	4.67529	4.72801	4.74492	4.74223	4.48721	4.65864	4.68234
Nup154	0.138713	0.0129924	18	6	0.0378934	3.42809	3.42724	3.44393	3.46004	3.44759	3.44841	3.36956	3.38441	3.35113	3.38849	3.44409	3.56431
Cp190	0.138713	0.0129924	18	6	0.0369743	4.62371	4.64091	4.62986	4.68868	4.67184	4.63282	4.61591	4.58027	4.56334	4.67478	4.66284	4.64017
ird1	0.138713	0.0129924	18	3	0.0357653	3.57557	3.59776	3.6207	3.61725	3.56444	3.56947	3.50944	3.52042	3.57012	3.6072	3.68004	3.69715
GluClalpha	0.138713	0.0129924	18	12	0.0355638	4.34111	4.24473	4.21798	4.33163	4.29039	4.37316	4.29804	4.3914	4.35901	4.19111	4.05381	4.0666
CG5961	0.138713	0.0129924	18	3	0.0346714	4.20796	4.23126	4.22859	4.19024	4.32979	4.1731	4.17033	4.19703	4.12406	4.41958	4.30391	4.39534
Ddx1	0.138713	0.0129924	18	3	0.0336083	3.74673	3.76016	3.75117	3.74284	3.78107	3.7586	3.69494	3.71622	3.69531	3.78097	3.82166	3.86118
Socs16D	0.138713	0.0129924	24	6	0.032992	4.81933	4.88401	4.88091	4.877	4.95446	4.9322	4.86887	4.84765	4.84973	4.79379	4.81182	4.83801
CG13663	0.138713	0.0129924	18	3	0.0324525	4.46077	4.45798	4.52415	4.47023	4.52203	4.43386	4.44189	4.44445	4.37293	4.63717	4.52559	4.53582
be	0.138713	0.0129924	24	12	0.0320568	3.76773	3.76447	3.78585	3.76497	3.84178	3.82362	3.87885	3.86399	3.85092	3.81875	3.81916	3.83334
CG43072	0.138713	0.0129924	18	12	0.0310987	1.07578	1.02752	1.02622	1.22684	1.0322	1.03076	1.11976	1.05737	1.08756	1.01104	1.02494	1.02221
CG5220	0.138713	0.0129924	18	3	0.030813	4.10572	4.03708	4.03349	4.02756	4.02896	4.07433	3.90859	4.03075	4.00402	4.12938	4.1166	4.04046
Ntmt	0.138713	0.0129924	18	3	0.0306611	4.5496	4.53624	4.61307	4.49121	4.51326	4.56697	4.53118	4.50624	4.43144	4.61934	4.63514	4.58738
CG9003	0.138713	0.0129924	18	12	0.030418	4.15367	4.09364	4.13825	4.18082	4.18778	4.14122	4.2602	4.17304	4.18601	4.10589	4.06269	4.09497
CHIP	0.138713	0.0129924	18	3	0.0303512	5.5272	5.51036	5.49956	5.53947	5.46468	5.46015	5.46697	5.46063	5.4405	5.65071	5.56382	5.55604
skpA	0.138713	0.0129924	18	3	0.0297718	6.33086	6.35139	6.38875	6.36018	6.36969	6.38097	6.28638	6.32774	6.32758	6.56504	6.48345	6.44543
CG2938	0.138713	0.0129924	18	3	0.0297396	3.77791	3.77822	3.76763	3.77504	3.82003	3.75198	3.73153	3.73616	3.71904	3.78716	3.81317	3.8754
Nup133	0.138713	0.0129924	18	3	0.0294316	2.3918	2.36724	2.42079	2.36278	2.4223	2.36022	2.3201	2.35927	2.36032	2.40351	2.4746	2.45482
CG7337	0.138713	0.0129924	18	12	0.0292836	4.73208	4.78325	4.68857	4.80386	4.80474	4.81952	4.82072	4.84616	4.79903	4.64654	4.72075	4.73776
CG32163	0.138713	0.0129924	18	3	0.0290293	4.91618	4.89653	5.0232	4.84993	4.90431	4.88663	4.86456	4.86326	4.78044	5.0722	4.97967	4.90912
Arp5	0.138713	0.0129924	18	3	0.0280043	3.01693	2.94215	3.01137	2.97217	2.99638	2.98562	2.92224	2.91168	2.99305	3.08638	3.01819	3.04581
CG1115	0.138713	0.0129924	18	3	0.0273384	5.10464	5.18299	5.18322	5.14773	5.15554	5.12764	5.14433	5.01743	5.10609	5.30703	5.20777	5.31877
CG5608	0.138713	0.0129924	18	3	0.02663	3.56484	3.61452	3.55124	3.49346	3.46237	3.52915	3.49149	3.46006	3.53296	3.57108	3.57596	3.61802
hoip	0.138713	0.0129924	18	3	0.0263716	4.3477	4.29678	4.33919	4.26411	4.26808	4.29187	4.19428	4.31464	4.23532	4.43878	4.31764	4.40608
CG10713	0.138713	0.0129924	18	12	0.0244011	2.19556	2.23798	2.27505	2.24763	2.28327	2.34317	2.29321	2.27249	2.3494	2.17178	2.1372	2.23745
HLHm3	0.138713	0.0129924	18	3	0.0240851	1.58707	1.68393	1.55301	1.57176	1.56166	1.62025	1.55984	1.51939	1.55986	1.717	1.84786	1.75388
Pof	0.138713	0.0129924	18	3	0.0235608	3.29147	3.31719	3.34042	3.26242	3.30613	3.28748	3.21881	3.33367	3.22872	3.36609	3.35594	3.38146
koi	0.138713	0.0129924	18	12	0.0229337	2.42682	2.43438	2.46727	2.47015	2.4789	2.47576	2.45925	2.52577	2.50122	2.37497	2.38018	2.43562
CG33156	0.138713	0.0129924	24	18	0.0227912	3.12633	3.12314	3.15131	3.11933	3.11682	3.12815	3.14086	3.13687	3.18814	3.15182	3.1583	3.22305
CG14464	0.138713	0.0129924	18	3	0.0224166	5.78163	5.7391	5.73952	5.6832	5.73819	5.70649	5.53081	5.71132	5.70752	5.92406	5.74022	5.75356
CG8531	0.138713	0.0129924	18	3	0.0187968	5.47331	5.54031	5.48593	5.46813	5.49562	5.44651	5.45935	5.48095	5.40389	5.56303	5.63397	5.63341
pum	0.138713	0.0129924	18	12	0.0172591	2.92567	2.84313	2.90127	2.97155	2.9053	2.93542	2.95008	2.94756	2.9292	2.8393	2.79755	2.89595
CG1885	0.138713	0.0129924	18	3	0.014497	3.7106	3.78055	3.81722	3.77345	3.76426	3.77085	3.74137	3.74877	3.76005	3.98361	3.81746	3.88641
CG10252	0.138713	0.0129924	18	12	0.0110366	1.01145	1.01226	1	1.03078	1.01436	1.02731	1.04093	1.77433	1.01328	1.00979	1.00556	1.00495
CG18316	0.138713	0.0129924	18	3	0.00979477	3.7303	3.70103	3.75166	3.63072	3.68409	3.67254	3.6614	3.62076	3.73781	3.88998	3.76188	3.81679
CG13442	0.138713	0.0129924	24	12	0.0078008	1	1	1.00624	1.01649	1.00767	1.00733	1.01468	1.0274	1.01415	1	1.00593	1.00264
CG31802	0.176842	0.0184659	18	15	0.0306737	1	1.013	1.03685	1	1	1	1.04338	1.05402	1.05552	1.0052	1.01763	1
CG16957	0.176842	0.0184659	24	12	0.00908325	1	1	1	1.01637	1	1.01451	1.02899	1.10584	1.01405	1.00519	1.00589	1.01046
CG8349	0.176842	0.0184659	24	15	0.00883466	1	1	1	1	1	1	1.01296	1.18314	1.01249	1.00461	1.03113	1.00466
CG6283	0.176842	0.0239394	18	15	0.638181	5.02804	4.71191	4.27357	4.66077	3.97069	4.10968	5.65235	5.40119	5.5633	4.63188	4.99766	4.46554
CG42397	0.176842	0.0239394	18	3	0.624236	5.73244	6.63175	6.59283	6.16328	4.79356	5.53701	5.20295	4.88	5.12542	5.99033	6.97073	6.77034
CG12374	0.176842	0.0239394	24	3	0.619821	8.49734	8.28898	8.89152	8.83544	8.35452	8.6585	7.66182	7.12269	7.78205	7.92445	7.83287	7.64979
GstD5	0.176842	0.0239394	24	9	0.491261	3.90226	3.44098	3.34413	3.86595	4.31456	4.12523	3.79016	3.97702	4.39538	3.13813	3.42871	3.14772
fu12	0.176842	0.0239394	18	12	0.473618	4.23743	3.91111	4.12908	3.99562	4.00756	3.79729	4.84892	4.69845	4.66542	3.79086	3.69825	3.59117
cwo	0.176842	0.0239394	24	15	0.399604	4.34037	4.36988	4.19624	4.18448	4.2551	4.31184	4.99858	5.03629	4.97184	4.60145	4.6609	4.72453
CG13101	0.176842	0.0239394	24	6	0.38437	4.6966	4.54929	4.71397	4.52921	4.72157	4.38659	4.0891	4.26767	4.19823	4.13278	3.88733	3.73161
CG9451	0.176842	0.0239394	18	15	0.370007	5.9129	5.77985	5.82897	5.75361	5.5773	5.49156	6.6182	6.36262	6.29309	5.46195	5.45248	5.63491
CG4576	0.176842	0.0239394	24	21	0.324087	1.78288	2.11569	1.65774	1.55401	1.71913	1.59529	1.55394	1.77115	1.9278	2.44572	2.35375	2.34976
mdy	0.176842	0.0239394	24	3	0.320439	5.40232	5.37765	5.33625	5.03068	4.96323	4.97742	4.79592	4.85908	4.82828	4.71899	4.85242	4.5116
snoRNA:Me28S-G2703a	0.176842	0.0239394	24	6	0.312582	1.99555	2.20807	2.16859	2.22946	2.16849	2.30243	1.63425	1.82896	1.84663	1.66721	2.00069	1.54785
CG6465	0.176842	0.0239394	18	15	0.304376	4.64571	4.06156	4.37109	4.06092	3.96502	3.80331	4.54902	4.23376	4.48061	4.02412	4.17465	4.07842
Mocs1	0.176842	0.0239394	24	6	0.29669	4.6277	4.51804	4.69594	4.62355	4.58736	4.51627	4.21267	4.25586	4.39051	4.0996	4.09713	4.04034
CG8745	0.176842	0.0239394	18	12	0.29533	6.97712	7.05053	7.19882	7.05469	6.9253	7.02815	7.7598	7.38233	7.54278	6.63854	6.92708	6.88093
CG1139	0.176842	0.0239394	18	12	0.292894	3.23501	3.09834	3.35614	3.11196	2.96157	3.09837	3.90498	3.51253	3.71034	2.21915	2.78213	2.39537
CG7296	0.176842	0.0239394	24	12	0.291593	4.8918	4.53203	4.42231	5.20614	5.24084	5.45606	5.63178	5.68552	5.25247	5.39699	5.10169	5.36779
CG16898	0.176842	0.0239394	18	3	0.291478	6.29469	5.94047	6.33025	6.24466	6.47936	6.07083	5.08203	5.52312	6.1419	7.07365	6.59426	6.72819
CG9363	0.176842	0.0239394	24	9	0.290638	5.67648	5.3383	5.49323	5.56224	5.85568	5.6143	5.54682	5.67337	5.50294	4.83636	4.4883	4.60481
CG5955	0.176842	0.0239394	18	12	0.284384	4.48368	4.5941	4.49488	4.78832	4.43446	4.70567	5.10859	4.88586	5.08084	4.40431	4.44353	4.57637
CG12963	0.176842	0.0239394	18	12	0.281606	3.28335	2.91862	2.89899	3.03179	2.77945	2.90186	3.4769	3.25076	3.4649	2.3053	2.75529	2.41383
Cyp9h1	0.176842	0.0239394	24	15	0.25063	4.40461	4.36783	4.33866	4.59368	4.53445	4.55005	4.77263	4.71078	4.82	5.01741	4.77033	4.84354
CG10962	0.176842	0.0239394	18	15	0.243246	3.73046	3.87228	3.84395	3.64883	3.44045	3.60818	4.25126	4.02796	3.99284	3.507	3.46031	3.43339
LpR1	0.176842	0.0239394	18	15	0.240131	4.64047	4.26953	4.16735	4.17441	3.78138	3.85365	4.34104	4.42399	4.35377	3.93373	4.17748	4.18533
CG32512	0.176842	0.0239394	18	15	0.239703	4.25304	4.11905	3.94841	4.0227	3.88143	4.02097	4.57501	4.43425	4.49327	4.02514	4.30732	4.06515
bnb	0.176842	0.0239394	24	18	0.23918	5.6176	5.70434	5.79136	5.76018	5.85035	5.77807	5.91086	5.92219	6.03349	6.23672	6.21014	6.32971
CG8654	0.176842	0.0239394	18	3	0.223645	3.96236	3.81166	3.93381	4.16116	3.91927	4.11137	3.61292	3.61753	3.65851	4.861	4.88042	4.71569
CG13841	0.176842	0.0239394	24	9	0.222446	4.84615	5.12094	5.08378	5.27742	5.47736	5.19714	4.92927	5.27099	4.99701	4.96085	4.80412	4.47009
CG1943	0.176842	0.0239394	18	15	0.211008	6.20652	6.13736	6.16117	6.08574	5.99316	6.04661	6.60047	6.34738	6.5741	5.97865	6.12121	6.4426
CG4783	0.176842	0.0239394	24	3	0.208716	8.98093	9.11012	9.17287	8.88038	8.99281	9.08969	8.66994	8.72111	8.73244	9.05147	8.67517	8.80032
CG15695	0.176842	0.0239394	24	6	0.204991	3.78727	3.6532	3.87325	3.75805	3.98403	3.86737	3.49253	3.62128	3.50051	3.72147	3.41678	3.45357
Galpha73B	0.176842	0.0239394	24	15	0.199746	2.32303	2.17223	2.26307	2.58561	2.35627	2.27578	2.72596	2.39049	2.69705	2.48705	2.55901	2.63801
CG32032	0.176842	0.0239394	24	15	0.199659	5.91073	6.02998	5.94705	5.95078	6.01071	5.84754	6.40656	6.28998	6.33823	6.1775	6.16883	5.99106
CG5707	0.176842	0.0239394	18	6	0.197195	4.94005	5.13011	5.06318	5.15977	5.18079	5.20806	4.58461	4.74587	4.73362	5.19819	5.20188	5.28785
CG5948	0.176842	0.0239394	24	12	0.195441	1.84588	1.99085	2.05291	2.23033	2.50431	2.29622	2.37506	2.5598	2.27346	2.46296	2.13454	2.17207
CG9629	0.176842	0.0239394	24	15	0.19469	4.69166	4.57164	4.75278	4.80397	4.59133	4.58757	5.11739	4.94061	5.16269	4.70742	4.78325	4.91683
Lip4	0.176842	0.0239394	18	6	0.194212	4.8565	4.41917	4.6817	4.94508	4.87217	4.81853	4.54437	4.26387	4.64557	4.71082	4.81807	4.66305
CG14356	0.176842	0.0239394	18	6	0.19316	4.0159	4.03386	4.03449	4.31727	4.22592	4.30811	3.95275	3.94742	3.95826	4.44939	4.36508	4.30409
Got2	0.176842	0.0239394	18	12	0.192706	7.5816	7.68249	7.61768	7.63508	7.45093	7.46317	7.90761	7.769	7.9166	7.10434	7.30966	7.299
CG15202	0.176842	0.0239394	24	21	0.190425	5.49697	5.68448	5.7128	5.43912	5.59012	5.5378	5.47323	5.60967	5.5849	6.23235	6.07752	5.90006
CG31296	0.176842	0.0239394	18	6	0.184962	1.42216	1.48338	1.68972	1.68683	1.65597	1.72593	1.41474	1.29045	1.41165	1.45939	1.45614	1.6092
Mal-B2	0.176842	0.0239394	24	15	0.179866	6.16714	6.14172	6.02372	6.31948	6.27966	6.10047	6.58731	6.42059	6.59425	6.03548	6.3393	6.39701
CG9616	0.176842	0.0239394	24	6	0.179023	2.90975	2.78762	2.62183	2.75662	2.73057	2.92805	2.57497	2.69003	2.54721	2.01929	2.61687	2.32576
CG13659	0.176842	0.0239394	18	12	0.178938	3.21038	2.80936	3.05053	2.96591	3.06171	3.04756	3.36903	3.21897	3.41928	2.76203	2.84625	2.91175
CG4733	0.176842	0.0239394	24	15	0.175604	5.05925	5.26741	5.04471	5.34054	5.06877	5.05168	5.4325	5.5028	5.34302	5.31235	5.36998	5.12427
ple	0.176842	0.0239394	24	6	0.174449	5.27341	5.3399	5.48831	5.37603	5.57173	5.45297	5.27552	5.48413	5.18566	4.94147	5.02345	5.13257
CG13856	0.176842	0.0239394	24	15	0.172517	2.81162	2.85838	2.83537	2.97038	3.05373	2.91506	3.03614	3.21626	3.10045	3.5204	3.19555	3.0636
santa-maria	0.176842	0.0239394	24	15	0.167999	5.04266	5.08515	5.17699	5.26152	5.35688	5.30515	5.42096	5.35983	5.48471	5.55386	5.43302	5.42896
CG8630	0.176842	0.0239394	24	15	0.167761	4.16963	4.35478	4.14915	4.21183	4.20525	4.26993	4.49215	4.5474	4.35108	4.44744	4.48085	4.39648
CG8788	0.176842	0.0239394	24	15	0.167334	6.58027	6.52054	6.5675	6.69917	6.79063	6.72827	6.90409	6.80518	6.86469	7.02923	6.90104	6.90232
CG3009	0.176842	0.0239394	18	15	0.164821	3.7907	4.00281	3.92464	3.75588	3.67794	3.76972	4.02845	3.93392	4.04036	3.90809	4.00234	3.68503
SmD3	0.176842	0.0239394	24	15	0.16323	3.3806	3.42167	3.50136	3.62128	3.57719	3.54142	3.78022	3.758	3.67786	3.78529	3.61594	3.78838
CG12643	0.176842	0.0239394	18	15	0.163074	5.23734	5.03781	5.02527	4.95583	4.79727	4.83951	5.21918	5.02789	5.25672	4.83335	4.84269	4.89747
CG31100	0.176842	0.0239394	24	21	0.163046	3.77572	3.96545	3.74227	3.7143	3.77301	3.64132	3.76465	3.90256	3.69255	4.17609	4.02496	4.02994
Psf2	0.176842	0.0239394	18	15	0.162668	4.45132	4.18525	4.30929	4.09562	4.04001	4.00432	4.35101	4.23574	4.24501	4.11627	4.22533	4.18765
CG4822	0.176842	0.0239394	24	18	0.162482	4.81385	4.66461	4.63914	4.75133	4.86653	4.78661	4.91514	4.94778	4.9456	5.06881	4.98138	5.04695
CG30098	0.176842	0.0239394	18	12	0.161759	3.31657	3.45334	3.36695	3.45108	3.14133	3.313	3.72696	3.48782	3.66626	2.75435	3.09401	2.7486
comm	0.176842	0.0239394	24	3	0.160084	2.62427	2.65696	2.72306	2.56838	2.8158	2.62258	2.34132	2.30965	2.58307	2.51052	2.50259	2.39668
obst-E	0.176842	0.0239394	24	6	0.158788	3.91122	3.9252	3.82014	3.8458	3.875	3.77945	3.74014	3.69938	3.75642	3.59268	3.49405	3.33506
MESR3	0.176842	0.0239394	24	15	0.158533	4.96256	5.02857	4.92425	4.93078	4.88396	4.93579	5.22203	5.22227	5.23925	5.12624	5.10978	5.11411
Pa1	0.176842	0.0239394	18	6	0.157364	4.3901	4.34557	4.38286	4.47426	4.39555	4.45624	4.01289	4.173	4.10772	4.40668	4.31007	4.32985
Skeletor	0.176842	0.0239394	24	6	0.154353	3.63982	3.69388	3.58401	3.549	3.5565	3.65804	3.53018	3.5128	3.43965	3.19131	3.33831	3.23835
CG2145	0.176842	0.0239394	24	6	0.154273	6.36207	6.49077	6.33861	6.41463	6.37573	6.37812	6.11876	6.17139	6.17663	6.03305	6.22491	6.16264
26-29-p	0.176842	0.0239394	24	18	0.151999	7.09369	7.09803	7.2224	7.1921	7.24665	7.12293	7.29403	7.31165	7.31312	7.50545	7.40693	7.44205
CG9005	0.176842	0.0239394	24	15	0.150841	4.74786	4.8849	4.71994	4.7706	4.72763	4.7342	5.09878	5.02202	5.0018	4.77525	4.9404	4.84318
Mes2	0.176842	0.0239394	24	15	0.147657	3.07293	2.94006	2.91698	2.97311	2.87417	2.98831	3.22521	3.25133	3.16398	3.06364	3.14923	3.17158
Ptp52F	0.176842	0.0239394	24	18	0.147341	2.73883	2.56008	2.59893	2.67114	2.54054	2.67358	2.87708	2.72583	2.81073	2.757	2.91289	2.95947
CG3775	0.176842	0.0239394	24	18	0.146804	4.92475	4.80055	4.72185	4.92226	4.78297	4.79328	5.09262	4.93572	4.98558	4.96432	5.15294	5.04233
Ubc84D	0.176842	0.0239394	18	6	0.144343	2.19453	2.32046	2.2853	2.40073	2.37326	2.41297	2.04602	2.02518	2.29702	2.23757	2.3151	2.3158
CG15861	0.176842	0.0239394	24	6	0.144173	2.2657	2.05976	2.20553	2.29774	2.2296	2.25941	2.05465	2.02288	2.03274	1.92083	2.04125	2.05639
UK114	0.176842	0.0239394	24	15	0.144103	7.67371	7.68646	7.74488	7.85817	7.66761	7.70154	8.00982	7.98375	8.12564	7.85518	7.78136	7.78414
Ubi-p5E	0.176842	0.0239394	18	3	0.142234	7.98477	7.78838	7.7545	7.82924	7.85813	7.87201	7.55884	7.59031	7.65961	8.0516	7.95469	8.0688
CG9676	0.176842	0.0239394	24	12	0.141512	1.34963	1.21703	1.31379	1.26911	1.4171	1.41946	6.36433	6.66669	6.04191	1.34987	1.32823	1.32455
CG6218	0.176842	0.0239394	24	6	0.141056	4.53811	4.72745	4.69011	4.62268	4.5757	4.6327	4.46414	4.5265	4.49169	4.47408	4.30758	4.31361
CycC	0.176842	0.0239394	18	3	0.140785	3.70267	3.6679	3.83141	3.75448	3.62732	3.81356	3.61544	3.39849	3.4688	3.8306	3.80506	3.87777
CG10799	0.176842	0.0239394	24	0	0.139936	7.85883	7.80479	7.64575	7.63608	7.54081	7.68546	7.44891	7.45136	7.60438	7.80265	7.88051	7.64106
CG34112	0.176842	0.0239394	24	18	0.13968	2.71345	2.69163	2.603	2.65672	2.62417	2.63084	2.79863	2.80563	2.92918	2.80243	2.85755	2.90562
CG9376	0.176842	0.0239394	18	3	0.139649	3.24812	3.35572	3.37572	3.34331	3.28246	3.30937	3.07174	3.15417	3.05063	3.36866	3.38704	3.31192
CG4829	0.176842	0.0239394	24	15	0.138562	3.6474	3.66876	3.72249	3.75781	3.82002	3.66849	3.88891	3.9316	3.90866	3.94694	3.9081	3.8127
CG15203	0.176842	0.0239394	18	6	0.138524	5.0663	5.00832	5.06492	5.0826	5.32072	5.23082	4.87802	4.95647	4.90522	5.33394	5.03136	5.03794
CG7203	0.176842	0.0239394	24	6	0.138049	5.7688	6.04652	5.88617	5.92253	5.92898	6.09422	5.9211	5.56347	5.83829	5.73509	5.73621	5.52062
CG43221	0.176842	0.0239394	24	0	0.136616	1.94679	1.64873	1.74498	1.44213	1.5841	1.4825	1.1107	1.53465	1.3868	1.42195	1.56749	1.62601
CG9990	0.176842	0.0239394	24	15	0.135923	5.39936	5.47148	5.47651	5.50752	5.71755	5.48884	5.66654	5.87543	5.59627	5.87398	5.63664	5.58239
Cyp4ae1	0.176842	0.0239394	24	21	0.134479	2.86805	2.71526	2.85602	2.78819	2.67624	2.66634	2.74818	2.75414	2.72206	3.03546	2.95191	3.06559
CG31706	0.176842	0.0239394	24	18	0.13295	4.84915	5.09024	5.07421	5.03896	4.99032	5.03527	5.05485	5.10708	5.04472	5.54033	5.33644	5.2707
Myo28B1	0.176842	0.0239394	18	12	0.132825	2.93803	2.69627	2.6493	2.69932	2.60184	2.72246	2.94529	2.87486	2.88411	2.37386	2.59825	2.56254
Poxm	0.176842	0.0239394	18	6	0.131967	2.46178	2.37869	2.5484	2.56605	2.68964	2.56532	2.36612	2.45104	2.29554	2.59927	2.47179	2.41912
Sec61beta	0.176842	0.0239394	24	3	0.131039	6.72647	6.55133	6.63551	6.67451	6.63623	6.71243	6.37408	6.35143	6.38456	6.62241	6.55058	6.53413
CG4860	0.176842	0.0239394	18	6	0.130981	3.37798	3.34619	3.1108	3.50582	3.42079	3.43719	3.24177	3.19571	3.25196	3.34391	3.40451	3.33461
CG4973	0.176842	0.0239394	18	3	0.130762	2.87416	2.87021	2.90684	2.86027	2.89943	2.99215	2.64772	2.68529	2.73048	2.92625	2.94924	3.05629
GstE1	0.176842	0.0239394	18	6	0.129812	6.86283	6.94957	6.98544	6.99759	7.11168	6.97143	6.72014	6.63129	6.78785	6.84447	6.9545	7.03824
lkb1	0.176842	0.0239394	18	3	0.12634	3.6624	3.66421	3.65987	3.67569	3.61281	3.57588	3.48373	3.44219	3.46781	3.6171	3.67693	3.71021
angel	0.176842	0.0239394	18	3	0.126158	2.68933	2.58076	2.71438	2.67592	2.55822	2.56485	2.42308	2.46838	2.38644	2.63624	2.59914	2.77251
FoxP	0.176842	0.0239394	24	3	0.125867	3.33029	3.32922	3.485	3.25371	3.19048	3.29554	3.00828	3.08618	3.25991	3.18404	3.06693	3.20071
Gpa2	0.176842	0.0239394	24	6	0.124729	4.19361	4.2875	4.24748	4.29852	4.16603	4.25045	4.10556	4.04947	4.15091	4.16158	3.96249	3.91194
CG6495	0.176842	0.0239394	24	12	0.124582	3.29127	3.48605	3.46561	3.6619	3.64747	3.75047	3.72245	3.61759	3.78228	3.68778	3.59208	3.53364
trem	0.176842	0.0239394	18	3	0.1243	2.44226	2.46788	2.45567	2.56478	2.42789	2.40148	2.2665	2.26647	2.24223	2.51361	2.47915	2.46731
CG4936	0.176842	0.0239394	18	3	0.124134	3.31148	3.42453	3.30427	3.38686	3.42866	3.40483	3.17635	3.22857	3.22928	3.47062	3.47819	3.48873
CG15877	0.176842	0.0239394	24	6	0.123192	3.42407	3.49599	3.36411	3.49148	3.46285	3.46103	3.2779	3.37714	3.2648	3.33801	3.2291	3.27588
CG7816	0.176842	0.0239394	24	18	0.122244	5.11126	5.09077	5.02209	5.08592	5.16713	5.15906	5.235	5.22976	5.17003	5.3878	5.27389	5.40192
Bub3	0.176842	0.0239394	18	3	0.121904	3.59321	3.53931	3.60513	3.40251	3.59276	3.6079	3.33858	3.41992	3.47485	3.66409	3.60785	3.66515
qsm	0.176842	0.0239394	24	6	0.12163	5.36482	5.46343	5.39796	5.37192	5.38131	5.35577	5.32249	5.30415	5.18966	5.165	5.18862	5.14907
CG34305	0.176842	0.0239394	24	12	0.121424	1.12797	1.0354	1.0667	1.21026	1.08165	1.15213	1.50457	1.55682	1.74212	1.08332	1.12428	1.05663
CG9471	0.176842	0.0239394	24	6	0.121053	4.85932	4.62459	4.75037	4.63601	4.70405	4.69707	4.56075	4.62722	4.60228	4.47001	4.5024	4.38889
CG1882	0.176842	0.0239394	24	18	0.121007	5.87797	5.98299	5.90258	6.02	5.82373	5.8561	6.10378	6.05165	6.04211	6.02469	6.23036	6.0776
CG17270	0.176842	0.0239394	18	15	0.118913	3.62592	3.71074	3.5787	3.60522	3.49424	3.51143	3.73659	3.77339	3.87475	3.4639	3.52253	3.49673
CG8435	0.176842	0.0239394	18	3	0.118852	3.46802	3.50598	3.55229	3.45775	3.5076	3.45868	3.29994	3.2881	3.3099	3.52527	3.47834	3.51221
Ndae1	0.176842	0.0239394	18	0	0.118716	4.38815	4.45795	4.46908	4.18636	4.22026	4.25973	4.26528	4.19337	4.32879	4.31177	4.48354	4.41937
CG4797	0.176842	0.0239394	18	0	0.117673	5.33638	5.34266	5.26933	5.03004	5.07108	5.07606	5.23023	5.31321	5.16997	5.23445	5.28229	5.37501
CG15535	0.176842	0.0239394	24	3	0.117375	3.57072	3.41106	3.63754	3.55066	3.54257	3.52192	3.18744	3.39898	3.34154	3.48729	3.31037	3.47828
CG42806	0.176842	0.0239394	24	6	0.114823	4.19027	3.99791	4.22534	4.28902	4.19825	4.28589	4.14033	3.98507	4.16493	4.0294	3.94387	4.05384
CG42550	0.176842	0.0239394	24	0	0.114587	3.29533	3.39217	3.2967	3.22972	2.98783	3.2718	3.07473	3.09595	3.09855	3.2635	3.2345	3.14948
CG18765	0.176842	0.0239394	24	18	0.113424	1.69256	1.75704	1.77282	1.60689	1.78605	1.69404	2.0178	1.84512	1.79981	1.96716	1.90452	1.85199
CG14642	0.176842	0.0239394	24	15	0.113049	1.34719	1.39128	1.51192	1.51126	1.37893	1.44949	1.55451	1.67642	1.66705	1.54303	1.50675	1.57329
Tcp-1eta	0.176842	0.0239394	18	6	0.111838	5.17244	5.27283	5.14546	5.20675	5.33633	5.27908	5.00102	5.05254	5.02663	5.18825	5.2329	5.33685
CG9391	0.176842	0.0239394	18	12	0.111689	6.02466	5.88418	5.92514	5.96622	6.04191	5.95267	6.17207	6.04805	6.33092	5.91672	5.87452	5.98015
mbc	0.176842	0.0239394	24	15	0.111497	4.28872	4.31351	4.32895	4.39811	4.44841	4.45308	4.52243	4.48094	4.53066	4.50414	4.54662	4.62759
CG17386	0.176842	0.0239394	24	3	0.110849	2.17583	2.29411	2.23047	2.16156	2.26691	2.22716	2.05434	2.06139	2.03645	2.16328	2.10693	2.03477
CG31720	0.176842	0.0239394	18	15	0.110665	2.22914	2.0979	2.11185	2.08988	1.93015	2.02099	2.30305	2.22636	2.1326	2.04685	2.15474	2.05132
l(2)k12914	0.176842	0.0239394	18	3	0.110617	6.20329	6.16172	6.18774	6.15138	6.22171	6.21291	5.98903	6.01599	6.04685	6.23349	6.22141	6.25437
drd	0.176842	0.0239394	24	15	0.108526	3.2473	3.08702	3.23409	3.15905	3.16175	3.28617	3.4429	3.31205	3.42047	3.25612	3.31936	3.34416
Cyp312a1	0.176842	0.0239394	24	3	0.108517	1.5282	1.58076	1.66861	1.42467	1.36932	1.38755	1.33332	1.33861	1.30034	1.31938	1.26954	1.30473
Nmt	0.176842	0.0239394	18	3	0.108053	3.90614	3.8032	3.88759	3.86206	3.90274	3.84339	3.73378	3.71622	3.66471	3.86914	3.92708	3.91677
CR43943	0.176842	0.0239394	24	3	0.107781	2.8481	2.93895	2.9753	2.94671	2.70591	2.81385	2.62603	2.67256	2.78574	2.79321	2.79122	2.72398
U2A	0.176842	0.0239394	18	6	0.107746	2.9632	2.97278	3.07087	3.16853	3.03957	3.22325	2.83885	2.92461	2.93287	3.24233	3.12994	3.20043
CG32038	0.176842	0.0239394	24	21	0.107642	5.27837	5.45232	5.45591	5.25125	5.23609	5.32812	5.34134	5.2418	5.39229	5.48388	5.47531	5.44975
kis	0.176842	0.0239394	24	9	0.107637	4.39476	4.38854	4.36875	4.54965	4.33894	4.55286	4.42602	4.39267	4.45181	4.14434	4.23293	4.29417
Pgm	0.176842	0.0239394	18	15	0.107631	7.86189	7.72877	7.72308	7.71001	7.69507	7.66715	7.9531	7.84728	7.96725	7.79415	7.84341	7.79195
wek	0.176842	0.0239394	18	3	0.10696	2.87947	2.74559	2.82581	2.73312	2.77531	2.79652	2.60355	2.59433	2.64528	2.88266	2.77865	2.82079
CG1971	0.176842	0.0239394	24	3	0.106841	3.12569	2.94975	3.07001	3.10431	2.99517	3.01244	2.89501	2.89339	2.84885	2.97226	2.90102	2.89183
P32	0.176842	0.0239394	24	21	0.106334	6.26641	6.40081	6.38607	6.24651	6.2799	6.27672	6.31368	6.29702	6.1913	6.56201	6.48735	6.43033
Srp14	0.176842	0.0239394	18	3	0.105389	5.6008	5.73519	5.65439	5.72131	5.66862	5.61695	5.50535	5.50873	5.47684	5.82619	5.73136	5.72417
CG5009	0.176842	0.0239394	24	15	0.105124	6.1692	6.13025	6.16857	6.21956	6.18394	6.12237	6.37953	6.37938	6.35793	6.15586	6.31756	6.24313
CG8678	0.176842	0.0239394	24	15	0.104229	4.41833	4.50817	4.325	4.4106	4.37873	4.48855	4.56304	4.5776	4.61984	4.51791	4.58336	4.53515
CG34039	0.176842	0.0239394	24	3	0.103568	3.98677	3.95393	4.0585	3.99323	3.98368	4.03893	3.76007	3.85461	3.88248	3.91471	3.88558	3.80479
Mad1	0.176842	0.0239394	18	6	0.10309	3.29085	3.28971	3.32732	3.40273	3.41014	3.41577	3.18153	3.21922	3.22652	3.40399	3.26997	3.44365
CG12090	0.176842	0.0239394	24	9	0.102152	5.64218	5.54968	5.61699	5.61552	5.88398	5.71489	5.57629	5.67205	5.63874	5.44223	5.42253	5.48473
Fatp	0.176842	0.0239394	24	15	0.101647	5.81464	5.67149	5.7253	5.98783	5.90429	5.84235	5.98509	5.99169	5.97592	5.93584	5.9609	5.99374
CG3165	0.176842	0.0239394	18	3	0.101553	3.55318	3.52939	3.46584	3.488	3.47425	3.40956	3.22058	3.38931	3.29204	3.55834	3.48389	3.52512
emp	0.176842	0.0239394	24	15	0.101249	7.38435	7.39028	7.43649	7.49206	7.63618	7.47361	7.62691	7.6646	7.58338	7.68293	7.53242	7.50091
CG16789	0.176842	0.0239394	24	3	0.101198	2.68084	2.80828	2.85264	2.82137	2.80796	2.77106	2.63707	2.59387	2.62634	2.64165	2.7311	2.78015
CG31922	0.176842	0.0239394	24	3	0.10061	2.87167	3.02107	2.98408	2.91279	2.91041	2.89476	2.67372	2.70432	2.76707	2.96381	2.8009	2.87107
CG8051	0.176842	0.0239394	24	18	0.100248	3.74051	3.71228	3.75806	3.72321	3.63364	3.6744	3.85153	3.75671	3.90557	3.7253	3.91095	3.91777
CG8132	0.176842	0.0239394	18	15	0.100239	4.86201	4.7872	4.78603	4.67536	4.64427	4.62949	4.81663	4.76502	4.86862	4.75945	4.73882	4.79083
Karl	0.176842	0.0239394	24	21	0.100127	4.49296	4.58618	4.62258	4.45565	4.45095	4.4539	4.44437	4.50988	4.49354	4.7212	4.53178	4.79644
CG31357	0.176842	0.0239394	18	3	0.0994648	4.36631	4.45622	4.41886	4.38751	4.48746	4.36793	4.24811	4.22002	4.29679	4.52641	4.44562	4.49256
CG1681	0.176842	0.0239394	24	18	0.0992905	7.49947	7.38079	7.3199	7.45934	7.37883	7.39498	7.50889	7.44068	7.52023	7.6076	7.64187	7.55017
CG7365	0.176842	0.0239394	24	18	0.0986939	1.47165	1.52792	1.50672	1.56889	1.46861	1.41744	1.61538	1.48863	1.6334	1.68618	1.7005	1.62627
Chro	0.176842	0.0239394	18	6	0.0986288	4.21847	4.19727	4.271	4.2734	4.36455	4.28181	4.06815	4.08503	4.08597	4.22761	4.19301	4.19428
NUCB1	0.176842	0.0239394	24	3	0.0985098	6.68989	6.61415	6.64199	6.66246	6.71714	6.68375	6.52434	6.38143	6.51954	6.54804	6.54319	6.59604
Sry-delta	0.176842	0.0239394	18	6	0.0984455	3.98811	4.1429	4.01339	4.14149	4.04216	4.15261	3.93472	3.91558	3.88567	4.07022	4.04156	4.08748
CG9782	0.176842	0.0239394	24	18	0.0980014	3.07149	2.98498	3.05544	2.9252	3.05747	2.9506	3.19383	3.08778	2.98235	3.24608	3.11527	3.26642
CG42514	0.176842	0.0239394	18	15	0.0975094	4.0686	3.95548	4.08303	3.9307	3.8945	3.97585	4.03245	4.10799	4.25762	3.93334	3.96689	3.99147
Taf5	0.176842	0.0239394	18	3	0.097411	3.49616	3.42973	3.43744	3.4461	3.46779	3.47164	3.33129	3.29968	3.29197	3.52122	3.48743	3.53497
grsm	0.176842	0.0239394	24	15	0.0966908	4.85693	4.86328	4.90258	5.00339	4.98433	4.94025	5.13123	5.03504	5.04887	4.95291	5.05627	5.14803
CG18661	0.176842	0.0239394	18	3	0.0965926	3.46743	3.52201	3.47668	3.4883	3.55819	3.44196	3.26854	3.30535	3.40103	3.64482	3.50869	3.56569
CG9821	0.176842	0.0239394	18	12	0.0950175	5.96734	5.83019	5.74085	5.98118	5.85408	5.82245	6.03933	6.03485	5.92095	5.80491	5.79185	5.71547
CG4847	0.176842	0.0239394	24	6	0.0948127	7.43881	7.49477	7.32038	7.47146	7.51021	7.44065	7.33612	7.3786	7.30782	7.30329	7.36842	7.16355
loj	0.176842	0.0239394	18	6	0.0943656	5.21231	5.09531	5.10784	5.22876	5.17127	5.22602	4.97291	4.96919	4.9801	5.33719	5.21483	5.18743
dsx	0.176842	0.0239394	18	12	0.0941242	4.05541	3.9755	4.07853	4.12256	3.93935	4.07614	4.2454	4.18554	4.16878	3.93718	3.96903	3.97781
Grasp65	0.176842	0.0239394	18	6	0.0940518	5.0168	4.94199	4.87088	4.99649	4.98897	5.01836	4.85193	4.83244	4.85596	4.92317	4.92941	4.96293
PGRP-LE	0.176842	0.0239394	18	6	0.0923869	3.41637	3.38429	3.54219	3.57104	3.54377	3.58619	3.4286	3.37567	3.45553	3.53356	3.47617	3.51943
cag	0.176842	0.0239394	18	6	0.0922532	3.5425	3.46421	3.51097	3.48047	3.61116	3.67026	3.33586	3.35	3.36819	3.72836	3.56161	3.59007
Spf45	0.176842	0.0239394	18	3	0.0919208	4.79224	4.73399	4.87235	4.77569	4.81987	4.73957	4.66828	4.60399	4.67108	4.91162	4.81878	4.85295
CG33494	0.176842	0.0239394	24	0	0.0916431	6.26949	6.17028	6.2103	6.04818	6.11745	6.14348	6.07852	6.05645	6.08072	6.24567	6.25836	6.16274
CG14286	0.176842	0.0239394	24	0	0.0912956	2.87416	2.83281	2.75893	2.7052	2.82097	2.7919	2.60077	2.68481	2.51284	2.82678	2.80429	2.8592
CG1416	0.176842	0.0239394	18	6	0.090995	6.46075	6.41352	6.4999	6.49511	6.5063	6.4837	6.21587	6.27674	6.23444	6.47813	6.43003	6.42989
CG42389	0.176842	0.0239394	18	6	0.0909138	3.56714	3.53461	3.4961	3.58236	3.56715	3.64884	3.38446	3.37259	3.39676	3.44392	3.57818	3.68962
CG33051	0.176842	0.0239394	24	0	0.0899834	3.61772	3.65689	3.59321	3.48764	3.60356	3.51046	3.19026	3.40946	3.49478	3.74536	3.51725	3.56231
VhaM9.7-b	0.176842	0.0239394	18	3	0.0897885	7.23731	7.25836	7.31371	7.17697	7.17959	7.27287	7.11836	7.07603	7.13121	7.32604	7.26393	7.24985
betaggt-I	0.176842	0.0239394	18	3	0.0893466	5.40843	5.48938	5.49608	5.46139	5.52925	5.52129	5.36552	5.32167	5.36973	5.88982	5.78913	5.77899
wol	0.176842	0.0239394	18	3	0.0893342	4.89957	4.80572	4.89801	4.86322	4.83806	4.87966	4.73206	4.71429	4.75332	4.89867	4.87567	4.92514
l(1)G0289	0.176842	0.0239394	24	18	0.0890096	5.82629	5.88488	5.83758	5.79031	5.82815	5.82022	5.98791	5.94517	5.95681	5.90188	5.93853	6.01623
CG14526	0.176842	0.0239394	18	0	0.0885282	6.19479	6.20621	6.33394	6.08049	6.01236	6.06562	6.17508	6.1379	6.11313	6.11613	6.14312	6.0769
Axn	0.176842	0.0239394	18	6	0.0880677	3.77575	3.85615	3.76068	3.8865	3.81419	3.8886	3.68965	3.67	3.72877	3.69001	3.78877	3.78001
NT5E-2	0.176842	0.0239394	18	3	0.0878152	5.06488	4.84889	4.98195	4.99746	4.96225	4.9717	4.88979	4.7247	4.83252	4.9918	5.07712	5.15537
CG11109	0.176842	0.0239394	18	3	0.0877969	3.52214	3.61513	3.61105	3.42032	3.54186	3.59687	3.43186	3.46004	3.40498	3.62204	3.54191	3.65572
Cyp49a1	0.176842	0.0239394	24	12	0.0872947	2.03634	2.03347	1.8752	2.15669	2.11874	2.09716	2.20755	2.17861	2.16493	2.09234	2.18081	1.96863
CG14441	0.176842	0.0239394	24	9	0.0869016	3.06382	2.96463	2.95929	3.12123	3.06982	3.07773	3.16985	3.07057	3.05738	2.91577	2.89312	3.00205
CG6023	0.176842	0.0239394	18	3	0.0868235	3.28929	3.50049	3.42889	3.38291	3.45269	3.4615	3.3299	3.17652	3.32511	3.52422	3.62141	3.52965
CG8159	0.176842	0.0239394	18	3	0.086643	2.64713	2.63429	2.73098	2.69598	2.62831	2.64283	2.5161	2.55529	2.46286	2.75967	2.68832	2.65744
Liprin-gamma	0.176842	0.0239394	24	6	0.0864983	4.18215	4.26812	4.32975	4.23909	4.341	4.33348	4.2156	4.20929	4.28092	3.9912	4.09862	4.13689
PNUTS	0.176842	0.0239394	24	3	0.0863997	5.46956	5.53315	5.53345	5.465	5.5018	5.54596	5.28121	5.2893	5.39695	5.38151	5.45599	5.49409
noc	0.176842	0.0239394	18	6	0.0856006	4.67387	4.65068	4.7327	4.76178	4.86488	4.70071	4.57767	4.61671	4.55226	4.78414	4.72682	4.66046
CG32795	0.176842	0.0239394	18	12	0.0853771	4.63074	4.53724	4.59239	4.55764	4.57674	4.45174	4.7207	4.64558	4.71738	4.42713	4.43712	4.40737
CG5734	0.176842	0.0239394	18	3	0.0849793	4.31664	4.34612	4.40185	4.37862	4.39488	4.33908	4.23041	4.17844	4.25844	4.39256	4.41023	4.53895
Abi	0.176842	0.0239394	18	6	0.0846585	4.13733	4.18878	4.24343	4.22647	4.24048	4.25374	4.07948	4.01661	4.10257	4.20525	4.19562	4.28654
CG7744	0.176842	0.0239394	24	18	0.0845088	2.49022	2.38182	2.36992	2.44282	2.38298	2.36782	2.48613	2.52017	2.46211	2.50651	2.56564	2.60351
pon	0.176842	0.0239394	18	6	0.0839404	1.85504	1.86649	1.90229	1.89382	2.02553	1.90785	1.78077	1.74778	1.70742	2.01078	1.93026	1.90998
Mekk1	0.176842	0.0239394	24	15	0.0839183	3.80654	3.82357	3.8299	3.85235	3.9015	3.86901	4.01688	3.94776	3.95816	3.85145	3.97185	3.97222
CG16979	0.176842	0.0239394	18	3	0.0839177	4.02571	3.9315	3.895	3.87671	3.89981	3.91352	3.75586	3.79484	3.80582	3.93217	3.90114	3.93498
CG13994	0.176842	0.0239394	18	3	0.0838482	5.03493	5.19365	5.06106	5.0839	5.06043	5.0764	4.96053	4.9407	4.94248	5.24029	5.14759	5.19002
CG6231	0.176842	0.0239394	24	15	0.0834048	4.80655	4.79052	4.74392	4.8673	4.7614	4.83315	4.92745	4.97483	4.94506	4.82764	4.96783	4.85815
aop	0.176842	0.0239394	24	15	0.0831642	3.43971	3.41259	3.487	3.42295	3.50182	3.52531	3.69647	3.66575	3.66461	3.45928	3.52277	3.51623
CG14757	0.176842	0.0239394	24	6	0.0830134	9.19355	9.30419	9.25794	9.40318	9.36513	9.35254	9.24773	9.28578	9.14401	9.27907	9.12237	9.01873
CG33332	0.176842	0.0239394	18	3	0.0830114	2.64817	2.50443	2.56469	2.51353	2.54447	2.41301	2.38481	2.39613	2.45435	2.59202	2.54925	2.60382
tld	0.176842	0.0239394	18	6	0.0829482	2.53416	2.49926	2.50451	2.56017	2.57279	2.53141	2.29969	2.26208	2.44061	2.34779	2.51305	2.5148
Opbp	0.176842	0.0239394	18	6	0.0825403	3.42919	3.41478	3.42358	3.57372	3.53205	3.37599	3.25926	3.33464	3.27565	3.54643	3.46073	3.49362
SPoCk	0.176842	0.0239394	24	15	0.0823771	4.86979	4.88889	4.83355	4.84169	4.86196	4.90763	4.96758	5.00514	5.0007	5.02325	4.95119	4.95819
CG11781	0.176842	0.0239394	18	3	0.0815566	4.3226	4.32979	4.4401	4.25236	4.40482	4.24749	4.13702	4.20334	4.28476	4.55977	4.39052	4.4123
CG8273	0.176842	0.0239394	18	6	0.081463	3.2832	3.20003	3.16534	3.28197	3.2929	3.23856	3.1003	3.16151	3.08482	3.17903	3.18427	3.2247
CG34394	0.176842	0.0239394	24	9	0.0812876	3.98474	3.87061	3.89874	4.03927	3.95626	4.00245	4.02762	3.98631	3.9878	3.76697	3.80983	3.94744
rogdi	0.176842	0.0239394	24	18	0.0806988	5.44763	5.3604	5.47327	5.24373	5.38335	5.3585	5.4889	5.3937	5.48513	5.60231	5.40486	5.51902
CG32809	0.176842	0.0239394	24	6	0.0805895	4.05121	4.11703	4.08988	4.10244	4.08177	4.18104	4.00751	3.97131	4.06684	3.68288	3.91526	4.05783
Srp9	0.176842	0.0239394	24	3	0.0805339	4.84683	4.76445	4.88727	4.77172	4.8205	4.83054	4.71227	4.53657	4.68114	4.77286	4.71029	4.76884
dpp	0.176842	0.0239394	18	6	0.0803311	3.06304	3.10557	3.11525	3.15098	3.13545	3.14389	2.8277	2.79053	2.79494	3.00676	3.06677	3.10266
p24-1	0.176842	0.0239394	18	6	0.0800124	6.17993	6.17639	6.20048	6.2617	6.1851	6.28093	6.03915	6.09414	6.05338	6.26549	6.19353	6.19147
CG1360	0.176842	0.0239394	18	6	0.0800098	2.47141	2.49707	2.47322	2.56507	2.54949	2.51082	2.31312	2.33441	2.34313	2.45358	2.4372	2.4946
aru	0.176842	0.0239394	24	12	0.0792188	4.22544	4.30809	4.24751	4.43831	4.42546	4.41324	4.47385	4.49231	4.34774	4.34222	4.42711	4.37857
Hs6st	0.176842	0.0239394	24	9	0.0790413	3.09211	3.07918	3.18168	3.21348	3.1719	3.20089	3.18569	3.25517	3.12663	3.05911	3.01945	3.08232
disco-r	0.176842	0.0239394	18	12	0.0787216	2.53678	2.53297	2.64811	2.56465	2.62625	2.67256	2.73494	2.73713	2.72292	2.44201	2.54818	2.61995
CG6370	0.176842	0.0239394	18	6	0.0783538	5.48828	5.37514	5.47003	5.48217	5.55392	5.55445	5.27648	5.29001	5.37777	5.44372	5.42498	5.51027
CG14273	0.176842	0.0239394	24	0	0.0778317	3.05673	3.14194	3.07415	2.96394	2.90355	2.96663	3.01949	2.84978	2.90255	3.01733	2.92043	3.0391
rgr	0.176842	0.0239394	24	15	0.0777527	2.40846	2.41346	2.57565	2.42921	2.52992	2.45851	2.61432	2.65842	2.61699	2.49216	2.51914	2.59731
CG14252	0.176842	0.0239394	18	6	0.0774179	2.90837	2.91766	2.96432	3.03706	3.07581	3.05453	2.88883	2.9843	3.01658	3.04466	3.01773	3.02805
CG3746	0.176842	0.0239394	18	6	0.07735	2.92879	2.97384	2.96879	2.95074	3.03818	3.05111	2.85732	2.85286	2.79555	3.30012	2.99475	3.0142
Ras64B	0.176842	0.0239394	18	3	0.0770377	5.64887	5.7732	5.63346	5.64177	5.72892	5.6389	5.52452	5.56641	5.56105	5.78064	5.73977	5.67279
CG16734	0.176842	0.0239394	24	21	0.0768925	2.16578	2.07546	2.09506	2.00982	1.99781	1.91543	2.0328	2.11165	1.92458	2.12863	2.11268	2.11218
smg	0.176842	0.0239394	18	6	0.0766067	3.55957	3.45031	3.43593	3.56346	3.54369	3.51933	3.42725	3.39909	3.4039	3.45318	3.44707	3.53877
CG13902	0.176842	0.0239394	18	3	0.0765469	3.5378	3.41447	3.44218	3.35595	3.46421	3.42178	3.26957	3.23655	3.41664	3.49571	3.47065	3.5465
CG1718	0.176842	0.0239394	24	9	0.0762968	4.07646	3.87396	3.9031	4.01746	3.99051	3.95502	3.88698	3.93308	3.90708	3.6066	3.74356	3.81441
CG8852	0.176842	0.0239394	24	18	0.0753978	2.98518	2.94941	2.93494	2.93303	2.84971	2.87487	3.06875	3.03799	2.98503	2.9838	3.05699	3.03871
CG4291	0.176842	0.0239394	18	6	0.0750704	3.40204	3.41547	3.4969	3.60311	3.52598	3.47472	3.38248	3.43119	3.29588	3.58628	3.46111	3.50281
Sin1	0.176842	0.0239394	18	6	0.0750698	2.86997	2.93448	2.98779	2.95017	2.9656	2.97602	2.82696	2.8153	2.82493	2.89162	2.93851	2.93578
CG3918	0.176842	0.0239394	24	6	0.0750365	3.67773	3.6384	3.72801	3.6673	3.75979	3.69606	3.69065	3.57601	3.6273	3.51364	3.52232	3.60244
Meics	0.176842	0.0239394	18	3	0.074868	3.32663	3.36527	3.4498	3.32285	3.36487	3.34481	3.21375	3.28468	3.22075	3.41712	3.36093	3.43746
del	0.176842	0.0239394	18	6	0.0748388	1.87058	1.77277	1.83923	1.90029	2.00782	1.87861	1.69432	1.81028	1.79337	1.87031	1.83093	1.91988
CG3309	0.176842	0.0239394	18	6	0.0746289	2.70821	2.74508	2.6631	2.7591	2.77529	2.7505	2.60174	2.63637	2.64247	2.6487	2.7025	2.75971
Npc1a	0.176842	0.0239394	24	15	0.0745671	4.85379	4.79869	4.85531	4.85768	4.9366	4.85826	4.90373	4.97507	4.95894	5.00599	4.93932	4.96767
CG17776	0.176842	0.0239394	18	3	0.0735575	6.33031	6.53285	6.50987	6.53928	6.43365	6.47169	6.40411	6.3239	6.40584	6.5789	6.54982	6.54866
nct	0.176842	0.0239394	18	3	0.0732956	4.1205	4.06644	4.09672	4.07382	4.14764	4.14645	3.9918	3.99306	4.00148	4.14827	4.18801	4.22025
CG7988	0.176842	0.0239394	24	0	0.0729568	2.73073	2.81465	2.79498	2.6152	2.70491	2.72225	2.61482	2.49943	2.71375	2.8042	2.74993	2.7106
CG8417	0.176842	0.0239394	18	15	0.0729047	5.94583	5.88229	5.89079	5.86363	5.79561	5.77919	5.97821	5.92929	5.95351	5.78881	5.80604	5.77226
Timp	0.176842	0.0239394	18	3	0.0726765	6.65029	6.75252	6.55294	6.55607	6.4986	6.61515	6.50096	6.50471	6.50862	6.74543	6.86821	6.74151
CG7745	0.176842	0.0239394	18	6	0.0724578	2.9036	2.90277	2.94187	2.90008	3.00255	2.99824	2.77471	2.73667	2.80247	2.97863	2.90894	2.94951
CG14400	0.176842	0.0239394	24	12	0.0724467	5.46956	5.26846	5.44823	5.5628	5.60392	5.55435	5.63703	5.52182	5.70339	5.60202	5.54475	5.51429
CG9147	0.176842	0.0239394	24	0	0.072439	3.43415	3.47428	3.53618	3.34241	3.40921	3.42889	3.29546	3.36309	3.39878	3.49958	3.42488	3.50287
CG11261	0.176842	0.0239394	18	3	0.0722051	2.733	2.66297	2.68732	2.69397	2.68532	2.58831	2.60299	2.55167	2.54618	2.70073	2.707	2.69867
CG42533	0.176842	0.0239394	24	6	0.0722009	4.01222	3.92656	3.96476	3.96934	3.94193	3.98829	3.88618	3.93131	3.95054	3.77307	3.81525	3.80762
CG30099	0.176842	0.0239394	24	3	0.0719393	1.54249	1.48643	1.66612	1.45482	1.64308	1.45643	1.36258	1.41107	1.38647	1.42997	1.47467	1.49142
Adf1	0.176842	0.0239394	24	18	0.0718533	4.54538	4.5002	4.52788	4.47661	4.58169	4.52747	4.64819	4.62817	4.59505	4.76751	4.60255	4.62929
zetaCOP	0.176842	0.0239394	18	3	0.0717775	5.31492	5.25864	5.31244	5.2261	5.28705	5.31545	5.10335	5.16217	5.21394	5.38862	5.31089	5.3193
hts	0.176842	0.0239394	24	9	0.0717258	4.46676	4.49673	4.45932	4.51525	4.54936	4.47281	4.4466	4.53228	4.47068	4.32258	4.29432	4.28255
Mtp	0.176842	0.0239394	18	12	0.0715361	5.59918	5.45113	5.5069	5.55849	5.3925	5.50548	5.66148	5.60665	5.59042	5.20194	5.23324	5.22518
E(Pc)	0.176842	0.0239394	18	6	0.0711401	3.1682	3.17178	3.16319	3.21562	3.21699	3.22948	3.03561	3.04462	3.08743	3.07729	3.1341	3.19627
epsilonCOP	0.176842	0.0239394	24	3	0.0711156	5.56976	5.69533	5.66736	5.6162	5.65181	5.69153	5.53379	5.55494	5.53586	5.55886	5.55026	5.62123
CG31224	0.176842	0.0239394	24	6	0.0710219	3.63402	3.59579	3.59223	3.62219	3.60243	3.60056	3.51397	3.48362	3.52841	3.40153	3.5023	3.56169
DhpD	0.176842	0.0239394	18	12	0.0701237	5.70546	5.77603	5.88916	5.76264	5.79344	5.72109	5.8752	5.8297	5.91536	5.53436	5.6963	5.66222
ash1	0.176842	0.0239394	24	6	0.069862	3.11161	3.15146	3.14607	3.13044	3.15274	3.16056	2.97757	3.04031	3.09208	3.02844	3.05245	3.09173
CG16965	0.176842	0.0239394	18	12	0.0696578	4.24158	3.86838	4.06182	4.3213	4.19087	4.10246	4.28586	4.25562	4.20098	3.68582	3.61224	3.94663
Grip128	0.176842	0.0239394	18	3	0.0696548	2.62668	2.65362	2.60601	2.58226	2.66491	2.61208	2.51814	2.52486	2.49413	2.62353	2.69437	2.7279
CG9257	0.176842	0.0239394	18	6	0.0690327	3.45928	3.39957	3.38656	3.47402	3.41157	3.54562	3.24716	3.31241	3.31394	3.51121	3.45876	3.50109
CG14778	0.176842	0.0239394	18	6	0.0686402	4.31237	4.37464	4.38987	4.4936	4.42851	4.4034	4.26916	4.36596	4.29286	4.43063	4.46234	4.44787
Abl	0.176842	0.0239394	24	6	0.0681855	3.37836	3.54672	3.49644	3.5019	3.46576	3.55032	3.46236	3.37035	3.45417	3.2089	3.33718	3.45004
pen-2	0.176842	0.0239394	18	3	0.0679696	4.1974	4.09701	4.19608	3.95679	3.95974	4.02329	3.92926	4.07935	3.95067	4.27175	4.10078	4.11055
CG33506	0.176842	0.0239394	24	21	0.0678222	4.79384	4.83052	4.87667	4.77596	4.73498	4.79151	4.82674	4.84312	4.72971	5.04846	5.02328	4.86491
KLHL18	0.176842	0.0239394	18	6	0.0677598	3.76114	3.86316	3.84111	3.85853	3.94796	3.93693	3.76953	3.80679	3.80663	3.88956	3.91671	3.92746
CG8783	0.176842	0.0239394	18	3	0.0677204	2.79135	2.81586	2.78056	2.78891	2.89881	2.72631	2.66321	2.68479	2.72269	2.92223	2.80128	2.85648
Mtpalpha	0.176842	0.0239394	24	12	0.0675389	6.09032	6.11896	6.07416	6.24066	6.17735	6.17377	6.22289	6.24187	6.21628	6.11875	6.23247	6.14575
CG6749	0.176842	0.0239394	24	6	0.0671046	3.21696	3.10959	3.05585	3.10275	3.18826	3.34461	3.09397	3.08707	3.09276	2.96158	3.08571	3.03871
TM9SF4	0.176842	0.0239394	18	3	0.067016	4.74119	4.6928	4.7514	4.65165	4.76601	4.74643	4.62823	4.58205	4.67088	4.77748	4.76518	4.78455
Oga	0.176842	0.0239394	24	0	0.0669887	3.21876	3.19144	3.16854	3.17921	3.10263	3.14814	3.04939	3.0492	3.00083	3.11502	3.18202	3.23883
Sgt1	0.176842	0.0239394	18	6	0.0665513	6.70771	6.64561	6.68871	6.71237	6.92954	6.93466	6.62009	6.67946	6.64886	6.87691	6.67526	6.73154
ksh	0.176842	0.0239394	18	3	0.0665428	4.99143	5.08898	5.14897	5.10506	5.0826	5.13784	4.99791	4.9125	5.03735	5.17066	5.15491	5.17817
CG7120	0.176842	0.0239394	24	18	0.0658703	3.62393	3.71472	3.73424	3.67532	3.64848	3.68586	3.7108	3.78528	3.7248	3.82797	3.8047	3.78139
CG41087	0.176842	0.0239394	24	15	0.0658457	1.05197	1.09151	1.10412	1.06988	1.12711	1.14092	1.28777	1.238	2.19591	1.12966	1.075	1.14474
CG8455	0.176842	0.0239394	18	3	0.0658339	3.59833	3.58036	3.55368	3.50579	3.50399	3.73207	3.46397	3.49123	3.46058	3.69771	3.62519	3.5959
CG2144	0.176842	0.0239394	18	3	0.0655014	2.83738	2.8967	2.91338	2.80218	2.88661	2.82906	2.64986	2.79398	2.76736	2.86721	2.86928	2.92303
CG4848	0.176842	0.0239394	18	6	0.0654458	3.82365	3.91269	3.84216	3.90851	3.88228	3.95311	3.77122	3.80717	3.76523	3.8253	3.87876	3.93568
CG31812	0.176842	0.0239394	24	3	0.0653773	2.24984	2.16481	2.28212	2.20629	2.12088	2.2348	2.05049	2.11814	1.97214	2.15418	2.21219	2.14358
CG13163	0.176842	0.0239394	18	3	0.0653048	3.42648	3.39764	3.51484	3.45294	3.39242	3.38719	3.31645	3.36705	3.29483	3.48842	3.47161	3.40605
Pi3K59F	0.176842	0.0239394	18	3	0.0650562	4.05603	4.17483	4.12383	4.10189	4.17851	4.09066	4.02721	4.00989	4.03004	4.14471	4.2173	4.23978
CG6204	0.176842	0.0239394	18	3	0.0650267	3.62512	3.52284	3.66266	3.5337	3.54435	3.54401	3.38233	3.5022	3.50205	3.64808	3.61278	3.66184
CG34002	0.176842	0.0239394	18	3	0.0649103	1.80854	1.63994	1.63824	1.66939	1.61597	1.70027	1.55987	1.57759	1.5706	1.76481	1.67761	1.83348
CG32485	0.176842	0.0239394	24	15	0.0648714	4.619	4.56285	4.61866	4.61996	4.71002	4.61791	4.75824	4.66513	4.84021	4.73324	4.63718	4.67278
CG3363	0.176842	0.0239394	18	6	0.0647153	2.7443	2.751	2.77885	2.78944	2.84211	2.81077	2.61761	2.69717	2.70524	2.73622	2.76312	2.90956
SmD2	0.176842	0.0239394	18	6	0.0643145	5.75097	5.74841	5.79763	5.80225	5.81374	5.83937	5.65757	5.68751	5.68295	5.90478	5.76053	5.70759
ovo	0.176842	0.0239394	18	12	0.0641575	2.35562	2.33836	2.31756	2.35158	2.42623	2.40648	2.52211	2.53436	2.37419	2.33607	2.33387	2.34913
CG11859	0.176842	0.0239394	18	3	0.0638479	4.33491	4.37101	4.36664	4.36241	4.44118	4.41926	4.27857	4.235	4.32896	4.5002	4.44156	4.47752
CG17565	0.176842	0.0239394	18	6	0.0634943	3.84319	3.81514	3.80019	3.94728	3.8068	3.90787	3.78168	3.68812	3.799	3.88915	3.92608	3.94157
CG14043	0.176842	0.0239394	18	3	0.0631666	3.61219	3.52369	3.56761	3.47873	3.52572	3.5496	3.42786	3.4444	3.46134	3.6112	3.53025	3.6079
fidipidine	0.176842	0.0239394	24	3	0.0630676	3.82978	3.76214	3.8118	3.77827	3.8313	3.75457	3.57819	3.63791	3.6836	3.79761	3.7131	3.75421
CG6333	0.176842	0.0239394	18	0	0.0629845	1.49333	1.51575	1.53858	1.45493	1.35901	1.40123	1.43651	1.40075	1.45108	1.41024	1.45761	1.4603
mod(mdg4)	0.176842	0.0239394	18	6	0.0628397	4.08702	4.13816	4.1533	4.14299	4.16809	4.17589	3.9749	4.0248	4.04148	4.08875	4.07936	4.15991
CG8925	0.176842	0.0239394	18	12	0.0628056	3.70434	3.63894	3.75707	3.75355	3.69754	3.75498	3.83003	3.74043	3.93336	3.24522	3.34805	3.45855
thoc7	0.176842	0.0239394	24	3	0.0626233	4.7895	4.74778	4.74083	4.70241	4.67588	4.75074	4.58677	4.6144	4.64527	4.73651	4.63848	4.72636
CG11436	0.176842	0.0239394	18	3	0.062538	2.49716	2.48136	2.44981	2.36205	2.47334	2.42436	2.32788	2.36136	2.38599	2.56193	2.52326	2.42395
CG3040	0.176842	0.0239394	18	3	0.062494	5.48265	5.54999	5.58555	5.46232	5.53465	5.51087	5.36175	5.49046	5.39671	5.67741	5.65207	5.53408
CG14903	0.176842	0.0239394	18	3	0.0623104	5.32318	5.41981	5.46236	5.41186	5.44666	5.43877	5.29776	5.3238	5.37546	5.58668	5.46764	5.50243
tws	0.176842	0.0239394	24	12	0.062222	4.87036	4.88158	4.85197	5.04138	4.96306	4.91599	5.0378	5.03412	4.99616	4.99433	4.97763	4.89152
Pi3K68D	0.176842	0.0239394	24	12	0.0614509	3.88861	3.79306	3.72098	3.90174	3.87445	3.92182	3.93274	3.95946	3.91355	3.77121	3.88479	3.85514
Egfr	0.176842	0.0239394	24	12	0.0612919	4.819	4.78352	4.82694	4.84527	4.87673	4.88713	5.02434	4.97133	4.90965	4.78102	4.9135	4.83141
Rala	0.176842	0.0239394	24	15	0.0612375	4.60083	4.51846	4.50048	4.60151	4.60613	4.61256	4.63191	4.65235	4.657	4.70816	4.6495	4.69136
CG2846	0.176842	0.0239394	24	0	0.0611769	5.18888	5.17411	5.15989	5.12077	5.10976	5.15148	4.99991	4.99635	5.0738	5.21029	5.11564	5.11091
CR43086	0.176842	0.0239394	18	6	0.0608337	2.08216	1.95043	1.92756	1.98775	2.16296	2.01359	1.72401	1.91205	1.91889	2.10107	1.97127	1.94771
ferrochelatase	0.176842	0.0239394	18	6	0.0607599	6.14138	6.11193	6.16083	6.19741	6.32184	6.24198	6.14719	6.10882	6.11148	6.22086	6.21904	6.41415
mus309	0.176842	0.0239394	24	0	0.0606628	1.68894	1.7225	1.67834	1.59229	1.67352	1.65339	1.60078	1.59264	1.53811	1.63915	1.6804	1.71041
wts	0.176842	0.0239394	24	6	0.0604257	4.14038	4.18368	4.23114	4.17842	4.29159	4.25877	4.17404	4.19499	4.14304	4.02144	4.09224	4.13163
tio	0.176842	0.0239394	24	6	0.0603734	2.30907	2.23689	2.30017	2.27836	2.32163	2.33815	2.24479	2.27925	2.17466	2.14047	2.20451	2.23597
d4	0.176842	0.0239394	18	3	0.0603313	4.67907	4.73235	4.70808	4.70693	4.73734	4.68339	4.58496	4.62161	4.62479	4.77428	4.8009	4.72288
Ice2	0.176842	0.0239394	24	3	0.0602568	2.55074	2.58141	2.56015	2.53419	2.59014	2.54601	2.43843	2.40107	2.44505	2.52289	2.47849	2.57414
CG12341	0.176842	0.0239394	24	21	0.060255	4.39655	4.39393	4.36516	4.37683	4.33055	4.35652	4.36921	4.26513	4.39064	4.53592	4.6584	4.46094
Clic	0.176842	0.0239394	18	12	0.0602424	5.76612	5.68572	5.73455	5.73332	5.74026	5.68858	5.86277	5.82138	5.79166	5.69474	5.66809	5.63549
CG8771	0.176842	0.0239394	18	3	0.0601193	2.63544	2.58616	2.57518	2.54414	2.58665	2.52964	2.49012	2.50114	2.49249	2.55205	2.60454	2.64018
CG7368	0.176842	0.0239394	18	12	0.0597282	1.64215	1.69462	1.62553	1.60383	1.64443	1.68123	1.72662	1.72613	1.76815	1.57565	1.63507	1.59226
CG1136	0.176842	0.0239394	24	15	0.0594495	3.71422	3.69391	3.80309	3.77436	3.7486	3.80911	3.88475	3.8918	3.78753	3.83213	3.85836	3.82289
CG31150	0.176842	0.0239394	18	3	0.0594031	4.48076	4.43883	4.4214	4.45828	4.37253	4.44679	4.34053	4.3516	4.36632	4.44057	4.53485	4.53937
CG17224	0.176842	0.0239394	24	0	0.059198	6.95313	6.91319	6.99331	6.85837	6.83023	6.8617	6.90022	6.8156	6.83798	6.89939	6.95296	6.8827
dpr5	0.176842	0.0239394	24	18	0.0591673	1.80924	1.912	1.9521	1.80391	1.86627	1.88622	1.97695	1.93187	1.95753	1.95287	1.97143	1.96101
CG5038	0.176842	0.0239394	18	6	0.0591157	1.93711	1.91109	1.95099	1.85787	2.04791	2.02928	1.76632	1.84998	1.89374	1.98059	1.95577	1.95744
CG4297	0.176842	0.0239394	24	12	0.0590686	2.50455	2.35464	2.33758	2.40562	2.43658	2.43275	2.54436	2.47855	2.5109	2.37101	2.38788	2.4053
Rapgap1	0.176842	0.0239394	24	6	0.058865	3.72356	3.73412	3.79759	3.79559	3.85976	3.79656	3.69378	3.76848	3.71831	3.72882	3.63746	3.67846
CG7789	0.176842	0.0239394	18	3	0.0588131	4.60649	4.69562	4.72607	4.6929	4.57295	4.64968	4.58961	4.53775	4.56922	4.75048	4.69087	4.71328
Hr96	0.176842	0.0239394	18	6	0.0584934	3.94465	3.9947	4.0206	4.02738	4.0074	4.02586	3.89876	3.86531	3.90438	3.95506	4.03665	4.00615
Octbeta2R	0.176842	0.0239394	24	6	0.0583633	3.08846	3.0881	3.13753	3.16075	3.19971	3.21036	3.0632	3.05076	3.07856	3.02697	3.10263	3.06935
CSN8	0.176842	0.0239394	18	3	0.0583516	4.73224	4.73098	4.76919	4.65011	4.79472	4.72894	4.53839	4.68462	4.6536	4.9167	4.75745	4.79751
ex	0.176842	0.0239394	18	6	0.0581413	3.34632	3.35278	3.35795	3.43501	3.43049	3.47547	3.35415	3.33019	3.30881	3.40719	3.52469	3.45469
wda	0.176842	0.0239394	18	3	0.0580614	2.74099	2.73905	2.75466	2.61382	2.71859	2.73191	2.57368	2.6753	2.6498	2.71498	2.76137	2.77153
CG12024	0.176842	0.0239394	24	15	0.0579878	5.56166	5.55758	5.54476	5.50362	5.60646	5.58759	5.7168	5.68571	5.65062	5.57334	5.64163	5.57126
CG6729	0.176842	0.0239394	24	0	0.0575363	3.26714	3.25956	3.26605	3.18605	3.25954	3.25684	3.14283	3.04674	3.10921	3.25506	3.23332	3.32139
CG17734	0.176842	0.0239394	18	3	0.0572843	7.01919	7.01928	7.05965	6.89818	6.81707	6.89681	6.87545	6.83947	6.88863	7.05393	7.08433	6.97532
gb	0.176842	0.0239394	18	6	0.0572427	2.46737	2.43588	2.4171	2.47492	2.57152	2.50027	2.39397	2.37757	2.41078	2.48119	2.40599	2.43263
Dhod	0.176842	0.0239394	18	3	0.0572363	5.19172	5.27517	5.27185	5.2241	5.33892	5.26042	5.17933	5.17733	5.19422	5.39999	5.31526	5.38042
Pbp95	0.176842	0.0239394	18	6	0.0571185	1.8441	1.90215	1.89955	1.92297	1.8964	1.93976	1.75003	1.79761	1.79952	1.90075	1.93197	1.91271
sec15	0.176842	0.0239394	18	3	0.0568486	3.62173	3.58306	3.66973	3.67836	3.63344	3.57995	3.54613	3.54133	3.54499	3.71762	3.67174	3.67196
Sas-4	0.176842	0.0239394	24	0	0.0566132	2.08691	2.09905	1.99653	2.00444	1.97932	2.00235	2.00089	1.93156	1.91766	2.04629	2.00956	2.07844
magu	0.176842	0.0239394	24	3	0.0565516	5.5139	5.61143	5.62496	5.46411	5.49404	5.53089	5.47552	5.43807	5.42279	5.4368	5.44363	5.49512
Fcp1	0.176842	0.0239394	24	3	0.0565148	3.16264	3.24387	3.24757	3.18084	3.21911	3.23548	3.11562	3.15995	3.0828	3.13953	3.13057	3.21903
mthl1	0.176842	0.0239394	24	3	0.056492	2.9348	2.88579	2.85868	2.80811	2.87427	2.844	2.81827	2.79237	2.72172	2.7469	2.81808	2.80726
asun	0.176842	0.0239394	18	3	0.056098	2.4737	2.55995	2.48498	2.4227	2.46727	2.52515	2.39437	2.39342	2.42186	2.47364	2.52662	2.60022
Eaf	0.176842	0.0239394	24	6	0.0560975	4.01531	3.97104	3.89268	3.94603	3.9784	3.95564	3.88252	3.91922	3.92539	3.86057	3.87373	3.85975
CG32262	0.176842	0.0239394	18	3	0.0556318	4.10082	4.05615	3.99444	4.06393	4.01594	4.08463	3.97747	3.97944	3.98263	4.23403	4.14381	4.07116
Aats-trp	0.176842	0.0239394	24	0	0.0555432	3.71823	3.70796	3.66628	3.61774	3.67553	3.65056	3.47558	3.58777	3.60182	3.6585	3.67492	3.74858
CG13784	0.176842	0.0239394	24	21	0.0553024	5.09769	5.01985	5.12987	5.06872	5.00382	5.04016	5.08577	5.06835	5.11932	5.17093	5.20048	5.21135
CG30424	0.176842	0.0239394	24	3	0.055025	3.41445	3.36793	3.45563	3.33657	3.34982	3.38857	3.24083	3.18556	3.36781	3.321	3.34135	3.31467
Sbp2	0.176842	0.0239394	18	3	0.0549705	4.58802	4.54862	4.62636	4.44801	4.47147	4.49636	4.44913	4.41091	4.48228	4.60518	4.56991	4.5995
CG31223	0.176842	0.0239394	24	21	0.054696	3.15085	3.17992	3.21414	3.04979	3.10611	3.10486	3.15954	3.14413	3.0802	3.20218	3.19911	3.17493
CG1074	0.176842	0.0239394	18	3	0.0544178	3.76542	3.72867	3.82099	3.73983	3.80667	3.78494	3.72968	3.66287	3.6738	3.86722	3.82462	3.81057
Ate1	0.176842	0.0239394	24	3	0.0542639	4.43856	4.48873	4.5658	4.45757	4.47901	4.47808	4.39225	4.28016	4.42893	4.38753	4.41281	4.44012
CG17737	0.176842	0.0239394	18	3	0.0540558	7.83838	7.81894	7.91851	7.86341	7.82044	7.78041	7.70396	7.71744	7.81966	8.08019	7.8648	7.87719
jing	0.176842	0.0239394	18	6	0.053542	2.02627	2.02511	2.03014	2.07875	2.09434	2.07755	1.93763	1.95894	2.00183	1.96483	2.01621	2.04932
CG13123	0.176842	0.0239394	18	3	0.0535327	2.32236	2.37137	2.25994	2.31534	2.30395	2.34049	2.22149	2.27121	2.22824	2.3297	2.37876	2.38154
Vha36-1	0.176842	0.0239394	18	3	0.0535308	7.52263	7.45845	7.53047	7.44771	7.43334	7.50269	7.41442	7.26951	7.42699	7.54591	7.47052	7.46469
GABA-B-R1	0.176842	0.0239394	18	12	0.053192	2.30513	2.32462	2.32069	2.26809	2.31502	2.32822	2.36907	2.40345	2.51223	2.3009	2.17907	2.2701
PSR	0.176842	0.0239394	18	6	0.0530554	4.83656	4.87697	4.83054	4.92864	4.87135	4.95114	4.84582	4.78817	4.80795	4.89441	4.92281	4.93455
adp	0.176842	0.0239394	24	21	0.0528801	4.5957	4.59599	4.54621	4.55547	4.5444	4.53257	4.54736	4.47314	4.55579	4.6323	4.64511	4.65932
Pi3K92E	0.176842	0.0239394	18	12	0.0528713	4.31022	4.37333	4.30663	4.3164	4.29365	4.33211	4.39803	4.38499	4.40089	4.14352	4.27837	4.30681
CG6654	0.176842	0.0239394	18	3	0.0527867	2.90196	2.99452	2.98852	2.93574	2.99591	2.92546	2.90712	2.86848	2.83705	3.05907	2.99542	3.02081
CG9062	0.176842	0.0239394	18	3	0.0527757	3.46533	3.50278	3.55882	3.39383	3.52751	3.4641	3.42504	3.39368	3.42195	3.54101	3.51398	3.57868
kn	0.176842	0.0239394	18	15	0.0527328	1.63488	1.66792	1.69936	1.62505	1.60317	1.56603	1.74904	1.64765	1.68884	1.61286	1.59017	1.63509
CG7427	0.176842	0.0239394	24	21	0.0525702	4.61926	4.70262	4.71947	4.65049	4.59176	4.58671	4.65337	4.69937	4.59946	4.77748	4.72571	4.66524
Letm1	0.176842	0.0239394	24	15	0.0524166	6.18804	6.26183	6.22582	6.21545	6.27252	6.18971	6.33715	6.3527	6.30522	6.26265	6.27454	6.26114
CG42675	0.176842	0.0239394	24	9	0.0523696	4.17746	4.32456	4.26424	4.29117	4.39238	4.35234	4.27218	4.28726	4.2308	4.17006	4.22657	4.21515
CG14184	0.176842	0.0239394	18	3	0.0519651	5.69864	5.75117	5.79655	5.73531	5.8319	5.75953	5.62958	5.68828	5.69641	5.96224	5.80563	5.83868
CG3689	0.176842	0.0239394	18	6	0.0517853	4.42276	4.42219	4.4401	4.45909	4.49432	4.47715	4.3433	4.35919	4.38345	4.47584	4.40733	4.38818
CG33969	0.176842	0.0239394	24	21	0.0516763	3.52583	3.51086	3.46317	3.4036	3.4375	3.46685	3.46373	3.44399	3.45018	3.49621	3.55309	3.57154
Rev1	0.176842	0.0239394	18	3	0.0516498	2.88834	2.93134	2.90021	2.91171	2.84837	2.81752	2.70544	2.82315	2.831	2.9258	2.90635	2.97663
CTPsyn	0.176842	0.0239394	24	18	0.0514781	4.42701	4.40516	4.37455	4.32755	4.40112	4.4186	4.49127	4.4495	4.41212	4.49153	4.49087	4.46292
aft	0.176842	0.0239394	18	3	0.0513056	2.7701	2.83577	2.78548	2.80245	2.83209	2.77849	2.71292	2.62689	2.74218	2.85579	2.82966	2.94238
Orc4	0.176842	0.0239394	18	3	0.0512355	2.36465	2.24728	2.22126	2.17214	2.25072	2.24022	2.13802	2.14151	2.20773	2.31263	2.28387	2.35993
Alh	0.176842	0.0239394	24	6	0.0511538	2.85767	2.8563	2.88993	2.8606	2.93097	2.97724	2.84933	2.80984	2.93564	2.66617	2.80912	2.81787
RpI135	0.176842	0.0239394	18	3	0.0511481	2.5224	2.5521	2.44483	2.44284	2.47861	2.48196	2.37701	2.45007	2.38795	2.54098	2.53417	2.52855
FLASH	0.176842	0.0239394	24	0	0.0508051	2.45638	2.50511	2.42536	2.44655	2.35951	2.37486	2.2919	2.37539	2.21975	2.42768	2.38156	2.41963
Trax	0.176842	0.0239394	18	3	0.0507757	4.05457	3.98376	4.10976	4.08788	4.01111	4.08201	4.01608	3.89212	3.98281	4.18436	4.12221	4.24693
Tollo	0.176842	0.0239394	18	6	0.0506088	2.04252	1.9782	2.01032	2.06592	2.04308	2.03791	1.90797	1.97151	1.88605	1.98933	2.05449	1.99254
CG1671	0.176842	0.0239394	24	21	0.0505066	3.07745	3.21472	3.13878	3.10251	3.09006	3.08169	3.12944	3.13677	3.11875	3.16138	3.22108	3.37043
Jwa	0.176842	0.0239394	18	3	0.0503288	7.00262	6.93074	6.93109	6.92454	6.94358	6.97219	6.84265	6.80774	6.94171	7.01474	7.02799	7.0881
MED6	0.176842	0.0239394	18	9	0.050328	2.96989	2.96697	3.0012	3.10587	3.04555	3.0625	3.07237	3.04682	3.02263	3.06544	3.02202	3.00239
CG5783	0.176842	0.0239394	24	18	0.0501565	4.16418	4.1522	4.16013	4.13807	4.15386	4.14287	4.22324	4.21007	4.30025	4.25172	4.16884	4.22281
CG16865	0.176842	0.0239394	18	3	0.0496459	2.60146	2.66874	2.6316	2.57293	2.58309	2.70312	2.46873	2.53125	2.60533	2.76587	2.68479	2.70402
PpV	0.176842	0.0239394	18	3	0.0488922	4.82479	4.84672	4.81651	4.79564	4.914	4.84894	4.7906	4.64184	4.77536	4.91565	4.89111	4.93633
gem	0.176842	0.0239394	18	12	0.048339	6.53595	6.53881	6.50624	6.46509	6.5079	6.51618	6.56188	6.60717	6.60907	6.33697	6.43671	6.37824
CG14231	0.176842	0.0239394	24	18	0.0482057	2.86037	2.87333	2.8424	2.88122	2.85796	2.88821	2.88897	2.90275	2.92899	2.94105	2.99104	2.98581
5-HT7	0.176842	0.0239394	24	6	0.0481231	1.97535	2.00045	1.96569	2.05466	1.94612	1.95786	1.9391	1.92817	1.89968	1.87313	1.9202	1.88977
Bub1	0.176842	0.0239394	18	6	0.0480437	3.35997	3.34537	3.33191	3.3814	3.39367	3.36103	3.21344	3.19379	3.21868	3.2717	3.29205	3.37313
CG8008	0.176842	0.0239394	18	3	0.0480131	4.10265	4.11816	4.10283	3.83056	3.89258	3.85101	3.81909	3.96376	3.84503	4.19832	4.07533	4.2065
kst	0.176842	0.0239394	18	12	0.0475735	4.9967	4.85941	4.84426	5.01457	4.85206	4.88084	5.0087	4.91933	5.00484	4.57391	4.7833	4.80327
Pp2B-14D	0.176842	0.0239394	24	6	0.0475121	3.66751	3.6371	3.62487	3.63581	3.66831	3.64663	3.58403	3.59109	3.58345	3.52759	3.55045	3.6304
tamo	0.176842	0.0239394	18	12	0.0475117	4.09572	4.14395	4.21056	4.20503	4.30698	4.17715	4.25847	4.25233	4.24434	4.03384	4.14148	4.12751
l(2)k11101	0.176842	0.0239394	18	3	0.0474752	4.60518	4.62883	4.55162	4.60987	4.57851	4.61908	4.46934	4.56169	4.52233	4.62101	4.6671	4.62927
Acp65Aa	0.176842	0.0239394	24	12	0.0473092	1.15461	1.11746	1.03292	1.20548	1.13674	1.1486	1.25172	1.15689	1.55825	1.11393	1.13585	1.1344
Eip63F-1	0.176842	0.0239394	18	12	0.0471524	5.64762	5.51849	5.4937	5.5299	5.60847	5.57048	5.6081	5.7015	5.58518	5.45948	5.45073	5.28468
CG6163	0.176842	0.0239394	24	18	0.0470171	3.00114	3.01695	2.97337	2.85746	2.88342	2.92263	2.95185	3.01957	3.01466	3.01396	3.05999	3.02001
Ime4	0.176842	0.0239394	18	3	0.046802	2.78689	2.82239	2.76763	2.75604	2.65007	2.68646	2.72295	2.64749	2.67868	2.7629	2.84935	2.81051
CG14207	0.176842	0.0239394	18	3	0.0467277	8.35965	8.50963	8.35965	8.35141	8.48937	8.49424	8.39607	8.30072	8.32654	8.63005	8.66171	8.70797
His4r	0.176842	0.0239394	24	0	0.046298	9.68658	9.71363	9.74954	9.64863	9.70228	9.68207	9.58557	9.63842	9.62218	9.90443	9.6854	9.66289
CG32075	0.176842	0.0239394	24	0	0.0461667	3.0883	3.02045	3.0661	3.00687	2.93155	3.04662	2.8342	2.98383	2.95367	3.01746	3.01209	3.00472
CG33095	0.176842	0.0239394	24	3	0.0461505	3.53881	3.56711	3.61069	3.58263	3.58209	3.5377	3.38886	3.41549	3.52168	3.51252	3.53443	3.55871
alc	0.176842	0.0239394	24	3	0.0456069	6.95685	6.96608	6.88339	6.92295	6.93072	6.87118	6.85939	6.82724	6.84072	6.9074	6.87877	6.8294
Tim8	0.176842	0.0239394	18	3	0.0455025	6.68967	6.74096	6.65269	6.65586	6.53943	6.58993	6.55185	6.63843	6.53875	6.78591	6.72074	6.66818
Tango1	0.176842	0.0239394	24	6	0.0449933	5.26528	5.21358	5.18503	5.24474	5.20964	5.23787	5.18152	5.2107	5.15789	5.08962	5.1366	5.16975
Rga	0.176842	0.0239394	18	9	0.0448902	4.8112	4.80877	4.8621	4.90377	4.91118	4.89293	4.88829	4.81332	4.88689	4.77273	4.86227	4.82698
HdacX	0.176842	0.0239394	18	3	0.0445679	3.49305	3.44233	3.43752	3.44501	3.47863	3.44003	3.29567	3.34566	3.40939	3.51843	3.47248	3.5075
mtSSB	0.176842	0.0239394	24	0	0.0445302	4.07667	4.02343	4.10626	3.96357	3.98408	4.06146	3.99259	3.95494	3.93324	4.01492	4.04191	4.01369
Tao	0.176842	0.0239394	24	9	0.0444495	4.88456	4.88746	4.85203	4.91555	4.94448	4.98937	4.88982	4.87673	4.87795	4.68654	4.79542	4.88227
CG11398	0.176842	0.0239394	24	0	0.0444288	1.98038	2.04681	2.00446	1.94007	1.99762	1.95296	1.94184	1.90371	1.88292	2.04608	1.9492	2.0008
CG7466	0.176842	0.0239394	18	6	0.0443133	2.54754	2.46412	2.51846	2.55537	2.55634	2.57414	2.5028	2.49367	2.45463	2.52494	2.52214	2.57571
CG7556	0.176842	0.0239394	18	6	0.044175	4.81231	4.81789	4.78718	4.93185	4.85791	4.83454	4.77843	4.79544	4.67727	4.85894	4.80624	4.88872
Trx-2	0.176842	0.0239394	24	3	0.0441514	7.82932	7.89376	7.83028	7.78914	7.80848	7.86143	7.74118	7.65153	7.75126	7.80386	7.78344	7.85422
CG14408	0.176842	0.0239394	24	6	0.0438261	4.17526	4.24016	4.28052	4.26757	4.24557	4.27685	4.216	4.22412	4.21374	4.13545	4.13528	4.20269
Art3	0.176842	0.0239394	18	3	0.0436511	3.22104	3.24622	3.18731	3.22438	3.14946	3.227	3.10719	3.19963	3.15335	3.29639	3.25531	3.28475
Kdm4A	0.176842	0.0239394	24	3	0.0435389	2.81469	2.78797	2.83827	2.77494	2.81036	2.80123	2.6632	2.73274	2.5988	2.75459	2.76631	2.82957
M6	0.176842	0.0239394	24	18	0.042812	3.92246	3.91233	3.85927	3.88722	3.87977	3.83434	3.92704	3.90265	3.96104	3.99577	3.9522	3.92378
Rbbp5	0.176842	0.0239394	18	3	0.0426524	2.92057	2.96483	2.93612	2.92569	2.99412	2.87189	2.85823	2.86537	2.90132	3.01724	3.04729	2.95336
CG30069	0.176842	0.0239394	18	12	0.0423591	3.52479	3.51084	3.5503	3.65475	3.68478	3.64736	3.6624	3.69155	3.63258	3.43994	3.51325	3.53792
ytr	0.176842	0.0239394	18	9	0.041738	5.37727	5.38911	5.38873	5.47459	5.46518	5.44857	5.42963	5.44461	5.4022	5.40928	5.38416	5.4488
CG4080	0.176842	0.0239394	24	9	0.0417045	3.53331	3.57988	3.55321	3.55846	3.65519	3.62954	3.60076	3.61189	3.55832	3.54149	3.48762	3.55743
CG30089	0.176842	0.0239394	18	6	0.0415794	2.73596	2.83835	2.8236	2.85624	2.9107	2.8824	2.80098	2.80683	2.8025	2.83445	2.83554	2.88309
AlCR2	0.176842	0.0239394	18	15	0.0414827	1.45094	1.47205	1.45476	1.40887	1.4035	1.42161	1.4279	1.5084	1.53985	1.37238	1.40912	1.42658
dup	0.176842	0.0239394	24	0	0.0414796	1.73885	1.77136	1.84883	1.71785	1.70656	1.70507	1.65646	1.71249	1.71234	1.7612	1.76709	1.76873
dlg1	0.176842	0.0239394	24	6	0.0413601	4.55592	4.57156	4.53947	4.63922	4.54833	4.59584	4.54414	4.49624	4.56723	4.47448	4.48217	4.52049
wdb	0.176842	0.0239394	18	12	0.0412322	5.24202	5.19846	5.21684	5.27215	5.17702	5.22451	5.30728	5.28717	5.25544	5.16874	5.17586	5.20909
CG14355	0.176842	0.0239394	24	9	0.0411215	1.20358	1.16647	1.19945	1.26238	1.27013	1.24692	1.19212	1.25916	1.21585	1.1926	1.17873	1.18192
CG15012	0.176842	0.0239394	18	3	0.0411054	6.34803	6.40435	6.41589	6.40098	6.35565	6.42049	6.28341	6.32671	6.36879	6.5654	6.43903	6.55043
CG3605	0.176842	0.0239394	18	6	0.0407901	4.59261	4.62793	4.58785	4.64553	4.66264	4.6705	4.58987	4.61443	4.54583	4.65971	4.59568	4.66251
ste24a	0.176842	0.0239394	18	3	0.0407861	4.77418	4.75207	4.76269	4.70382	4.8602	4.75254	4.68333	4.72076	4.69486	4.93182	4.8276	4.81303
slik	0.176842	0.0239394	24	6	0.0405729	4.97905	4.98744	5.0286	5.02948	5.01866	5.06196	4.97253	4.95684	4.98158	4.83963	4.92964	5.01498
CG3587	0.176842	0.0239394	18	3	0.0405723	3.04593	3.2054	3.2473	3.14862	3.16219	3.20252	3.13638	3.128	3.10481	3.29661	3.23637	3.33091
CG17078	0.176842	0.0239394	24	3	0.0403216	3.52107	3.62055	3.59662	3.56672	3.55419	3.52979	3.41188	3.50618	3.47983	3.52271	3.51243	3.55679
CG14883	0.176842	0.0239394	24	0	0.0401927	3.71706	3.76854	3.73992	3.66724	3.69475	3.71542	3.63719	3.66132	3.6685	3.73882	3.66183	3.7256
l(1)G0222	0.176842	0.0239394	24	15	0.0401351	4.17299	4.24968	4.20197	4.27154	4.28309	4.29794	4.33048	4.36122	4.32613	4.16407	4.29744	4.29878
Golgin84	0.176842	0.0239394	18	3	0.0398639	3.83923	3.90838	3.80588	3.83656	3.9394	3.83088	3.7958	3.79201	3.78285	3.94402	3.88575	3.96671
Klp64D	0.176842	0.0239394	24	18	0.0392302	4.52402	4.53418	4.49685	4.48773	4.48528	4.53713	4.55361	4.48779	4.56203	4.59282	4.56963	4.57948
chn	0.176842	0.0239394	18	12	0.0380088	3.53609	3.57091	3.57214	3.50277	3.61917	3.63346	3.57143	3.62589	3.67687	3.4101	3.43243	3.47787
CG11306	0.176842	0.0239394	18	3	0.0376763	5.15724	5.15774	5.28086	5.16904	5.18354	5.13838	5.11229	5.05147	5.13026	5.23363	5.18524	5.24169
mspo	0.176842	0.0239394	18	12	0.0375332	3.4644	3.65427	3.49939	3.51175	3.52031	3.56449	3.52921	3.60143	3.58687	3.39231	3.46032	3.41502
bi	0.176842	0.0239394	18	9	0.0369287	1.41499	1.46237	1.46549	1.55079	1.56985	1.49343	1.4667	1.48601	1.48263	1.56695	1.48104	1.47369
flw	0.176842	0.0239394	24	6	0.036768	4.84812	4.77056	4.82216	4.80324	4.84038	4.81539	4.76596	4.7696	4.80505	4.75181	4.72373	4.76464
CG8791	0.176842	0.0239394	18	3	0.0365514	1.27041	1.19292	1.19554	1.23004	1.16857	1.17478	1.13009	1.14385	1.1608	1.20334	1.23562	1.21773
EfTuM	0.176842	0.0239394	18	3	0.0364709	6.62243	6.71049	6.68377	6.66432	6.65858	6.5461	6.65897	6.607	6.50941	6.71549	6.73285	6.68462
CG7191	0.176842	0.0239394	18	0	0.0363217	3.07026	2.94948	3.03648	2.91616	2.80011	2.92105	2.92923	2.9342	3.02164	2.9727	2.97398	3.00751
Snoo	0.176842	0.0239394	18	12	0.0350008	2.62222	2.46137	2.38838	2.46957	2.426	2.47786	2.54516	2.4846	2.51086	2.35246	2.35158	2.37946
vap	0.176842	0.0239394	18	3	0.0349886	3.90681	4.01212	4.00147	3.96588	4.01009	3.96324	3.93208	3.9179	3.93485	4.01373	4.01272	4.15702
Sur-8	0.176842	0.0239394	24	12	0.0341321	3.29882	3.2438	3.28376	3.31317	3.29765	3.36997	3.38555	3.32718	3.37145	3.30818	3.28972	3.36201
CG5787	0.176842	0.0239394	18	6	0.0336051	3.81492	3.79239	3.83026	3.81738	3.90892	3.88401	3.78731	3.80835	3.78637	3.87516	3.88323	3.91513
CG1427	0.176842	0.0239394	18	3	0.0335809	5.00209	5.03102	5.06487	5.04722	5.04639	5.04009	4.89998	4.97743	5.01594	5.20116	5.08502	5.07743
qkr58E-1	0.176842	0.0239394	24	12	0.0334761	3.83047	3.8327	3.69432	3.78558	3.85653	3.87333	3.91249	3.87855	3.97231	3.81352	3.84386	3.83337
CG10289	0.176842	0.0239394	18	3	0.0333934	3.87881	3.85252	3.85988	3.87457	3.87634	3.88225	3.81149	3.81661	3.82981	3.92996	3.88552	3.92358
CG3995	0.176842	0.0239394	18	3	0.0328946	3.86176	3.76502	3.82036	3.81257	3.81663	3.8737	3.77384	3.80843	3.75584	3.89787	3.90997	3.88662
san	0.176842	0.0239394	18	3	0.0322554	5.73899	5.78855	5.81137	5.72069	5.73374	5.8035	5.68812	5.73369	5.72938	5.83751	5.81173	5.74454
GNBP1	0.176842	0.0239394	18	3	0.03219	4.18444	4.17846	4.17249	4.12532	4.20562	4.09999	4.03994	4.12697	4.1523	4.32067	4.22757	4.21237
CG42674	0.176842	0.0239394	18	12	0.0321492	2.95589	2.88585	2.86489	2.96895	2.88833	2.97754	2.99383	2.93131	3.0293	2.71157	2.8248	2.89918
CG32582	0.176842	0.0239394	18	3	0.0306387	3.99582	3.99063	4.03556	3.9381	4.01803	3.9841	3.88006	4.00667	3.92977	4.03462	4.15027	4.10196
betaggt-II	0.176842	0.0239394	18	3	0.0303815	4.50589	4.57101	4.54088	4.52325	4.54882	4.54886	4.42275	4.35948	4.53684	4.61296	4.63299	4.68043
CG31806	0.176842	0.0239394	18	9	0.029883	1.03275	1.03505	1.0168	1.06571	1.08087	1.07731	1.0586	1.09054	1.03793	1.04871	1.03177	1.04226
CG32066	0.176842	0.0239394	18	9	0.0295581	3.91305	3.8834	3.82335	3.96509	3.94492	3.9531	3.92616	3.93469	3.93248	3.92121	3.94949	3.94361
CG12325	0.176842	0.0239394	18	3	0.0289135	2.53491	2.49785	2.48616	2.45993	2.42021	2.49495	2.40531	2.4143	2.50348	2.51526	2.56516	2.5905
CG6665	0.176842	0.0239394	18	3	0.0276796	4.21199	4.21509	4.15416	4.19021	4.18076	4.23095	4.16254	4.17337	4.12912	4.33683	4.31489	4.24873
CG5493	0.176842	0.0239394	18	3	0.0276486	6.60928	6.64811	6.69752	6.59875	6.54708	6.62373	6.56729	6.49951	6.65842	6.79986	6.76136	6.72819
ird5	0.176842	0.0239394	18	3	0.0271677	4.17072	4.17425	4.0956	4.10022	4.14454	4.09699	4.0344	4.1323	4.09639	4.19961	4.23403	4.19768
CG4645	0.176842	0.0239394	18	3	0.0271578	4.34843	4.30178	4.31958	4.33214	4.38927	4.29373	4.29334	4.2964	4.28047	4.41149	4.38089	4.39669
Plc21C	0.176842	0.0239394	18	12	0.0269773	4.9358	4.88691	4.97025	4.98679	4.92233	5.0566	5.0084	4.95175	5.05859	4.77279	4.80759	4.91669
veg	0.176842	0.0239394	18	3	0.026653	3.51828	3.59877	3.61684	3.49852	3.63646	3.51434	3.47886	3.50519	3.57138	3.72242	3.65578	3.68325
CG18507	0.176842	0.0239394	24	9	0.0260323	4.5246	4.58709	4.52248	4.56733	4.61112	4.57542	4.54771	4.54118	4.55481	4.53878	4.50806	4.50418
hth	0.176842	0.0239394	18	12	0.0260167	4.46348	4.35239	4.35181	4.474	4.39552	4.43796	4.47576	4.44586	4.41697	4.30087	4.25537	4.31393
boi	0.176842	0.0239394	18	12	0.0237674	2.06712	2.23404	2.20111	2.24937	2.25953	2.23439	2.27685	2.34385	2.20339	2.12377	2.14858	2.18887
CG8372	0.176842	0.0239394	18	3	0.021681	5.36502	5.34609	5.36977	5.25693	5.28689	5.29859	5.26098	5.19232	5.36979	5.50264	5.42281	5.42828
par-1	0.176842	0.0239394	18	12	0.0204742	5.28989	5.25773	5.24416	5.25453	5.24983	5.27311	5.30374	5.25903	5.30832	5.06599	5.16483	5.21731
CG17683	0.176842	0.0239394	18	0	0.0200539	5.36936	5.30326	5.38852	5.28378	5.29597	5.28885	5.2749	5.30536	5.29715	5.35596	5.31668	5.30642
jvl	0.176842	0.0239394	18	12	0.0191018	3.55855	3.51264	3.52289	3.56276	3.54227	3.57772	3.57154	3.54001	3.62228	3.41339	3.47342	3.51604
CG7083	0.176842	0.0239394	18	3	0.0190283	5.07123	5.07924	5.0605	5.06818	5.13461	5.06057	5.04127	5.05748	5.02925	5.22631	5.10904	5.13005
CG13597	0.176842	0.0239394	24	12	0.0185565	1.00611	1.00654	1.00623	1.04085	1.04541	1.00732	1.03639	1.21171	1.02814	1.0182	1.02356	1.01053
pxb	0.176842	0.0239394	24	0	0.0177548	1.72819	1.73951	1.74212	1.72379	1.69136	1.70607	1.67448	1.69781	1.70492	1.6982	1.7306	1.70737
Prp31	0.176842	0.0239394	18	3	0.0175099	4.30738	4.38589	4.41246	4.3578	4.33833	4.36192	4.34752	4.32819	4.33304	4.435	4.41372	4.46981
CG12096	0.176842	0.0239394	18	3	0.0171285	3.63261	3.72388	3.66523	3.65298	3.67486	3.58825	3.64882	3.62876	3.62008	3.74679	3.75818	3.73905
ssp	0.176842	0.0239394	18	3	0.0167419	4.21523	4.19026	4.20295	4.16675	4.22223	4.14762	4.16235	4.16106	4.18136	4.36238	4.27787	4.26765
CG11710	0.176842	0.0239394	18	3	0.0160724	3.8484	3.81297	3.7924	3.75436	3.76967	3.76795	3.68967	3.81386	3.76236	3.83711	3.85375	3.85543
lin19	0.176842	0.0239394	18	3	0.0149072	5.0409	5.08049	5.07663	5.09765	5.06832	5.06642	5.04054	5.05111	5.05881	5.10017	5.12038	5.13742
casp	0.176842	0.0239394	18	3	0.014701	4.55747	4.58307	4.58882	4.59266	4.57142	4.57884	4.53432	4.56496	4.5615	4.62366	4.60765	4.70595
CG2124	0.176842	0.0239394	18	3	0.0085987	2.30748	2.34215	2.33343	2.33123	2.33409	2.26091	2.29946	2.33026	2.29532	2.35407	2.3859	2.37823
CG42692	0.222082	0.0328788	18	15	0.020933	1	1.06598	1.01599	1	1	1	1.0558	1.06942	1.01817	1	1.0152	1.01354
CR43474	0.222082	0.0328788	18	0	0.00657899	1.0714	1.03868	1.0093	1	1	1	1	1	1	1	1.00885	1.00394
CG43095	0.222082	0.0418182	24	3	0.841972	4.39659	4.70031	4.16696	3.95342	4.25477	4.03496	3.0191	3.37302	3.02135	2.99982	3.20511	2.71201
CG8147	0.222082	0.0418182	18	15	0.636929	5.77414	6.12479	6.02205	5.61135	5.42903	5.37684	7.08786	7.31279	7.00506	3.76724	5.41386	5.03765
CG13482	0.222082	0.0418182	18	6	0.448207	5.93874	5.16566	5.31759	5.9231	5.78868	5.93731	4.84938	4.83667	5.29018	5.31579	5.581	5.61874
Cyp313a1	0.222082	0.0418182	24	15	0.434095	6.65942	6.95718	6.94676	7.37215	7.64114	7.30083	7.53314	8.02399	7.56319	8.14013	7.73218	7.47356
CG5945	0.222082	0.0418182	24	6	0.43175	9.69891	9.72938	9.7757	9.43108	9.82492	9.34075	9.16231	9.51139	9.16792	9.10799	8.55643	8.34021
CG9815	0.222082	0.0418182	24	18	0.405013	1.60833	1.60675	1.75802	1.72297	1.85187	1.82256	2.13835	2.08826	2.13762	2.6153	2.45313	2.48292
ade3	0.222082	0.0418182	24	12	0.378748	5.87137	5.95913	5.84064	6.16003	5.96808	5.95389	6.76585	6.67141	6.90088	5.53761	5.99822	6.00061
CG8550	0.222082	0.0418182	24	15	0.362982	3.06298	2.76463	2.63095	3.2469	3.39045	3.08276	3.33768	3.67777	3.56937	3.70838	3.70914	3.44539
CG30431	0.222082	0.0418182	18	3	0.360197	4.50217	4.54493	4.64666	4.61156	4.7552	4.82093	3.91981	3.75111	4.2458	4.91899	4.9804	5.07409
CG5853	0.222082	0.0418182	24	15	0.359038	4.81959	4.86199	4.98484	4.84969	4.80988	4.72694	5.62262	5.64476	5.55023	5.13509	5.22764	5.03208
CG8997	0.222082	0.0418182	24	15	0.322255	5.08024	5.13488	5.25728	5.74784	5.07902	5.3638	5.82369	5.57022	6.1291	5.38747	5.89469	5.49386
CG17324	0.222082	0.0418182	24	6	0.321284	4.3151	4.37042	3.94177	3.98756	4.12098	4.08601	3.83912	4.00586	3.89958	3.48421	3.53639	3.30521
GATAe	0.222082	0.0418182	24	15	0.306795	2.75752	2.70172	2.62047	2.72261	2.63201	2.61218	3.34906	3.32458	3.16551	2.72198	3.05685	2.92147
CG3376	0.222082	0.0418182	24	3	0.30592	4.87314	4.8957	4.9262	4.50459	4.57008	4.5207	4.38396	4.27032	4.49001	3.88109	4.24438	4.38072
fbl	0.222082	0.0418182	18	15	0.305895	5.50212	5.23152	5.1871	5.21264	5.16164	5.18781	5.8955	5.70001	5.8183	5.30532	5.41247	5.41101
Gk	0.222082	0.0418182	24	18	0.294145	4.47967	4.32704	4.49761	4.4507	4.2623	4.37695	4.91464	4.66094	4.95143	4.69785	4.7208	4.91255
CG14880	0.222082	0.0418182	24	18	0.291652	3.65872	3.75501	3.81275	3.80116	3.95733	3.92778	3.97306	4.06986	3.99427	4.52183	4.41865	4.44452
tRNA:CR31485:Psi	0.222082	0.0418182	24	3	0.287503	2.38961	2.45177	2.45947	2.42029	2.1352	2.55694	2.02319	2.05338	1.52835	2.17783	2.04468	1.89817
Hsp68	0.222082	0.0418182	24	3	0.286174	4.40875	4.26144	4.34509	4.36568	4.62635	4.40982	3.76938	3.84827	3.83386	4.23537	4.13171	4.1456
CG15096	0.222082	0.0418182	24	15	0.282359	6.52871	6.78884	6.51852	6.52313	6.48678	6.53599	7.05874	6.9753	7.06182	6.76819	6.89935	6.57388
Manf	0.222082	0.0418182	24	6	0.273195	6.25111	6.24447	6.28979	6.19414	6.25612	6.23648	5.84458	5.94085	5.99225	5.81761	5.71721	5.86938
Rpd3	0.222082	0.0418182	18	15	0.264885	4.36714	4.33194	4.3556	4.18964	4.17754	4.2168	4.83457	4.87204	4.66339	4.14593	4.12971	4.18424
CG8389	0.222082	0.0418182	18	3	0.262767	4.0325	3.93401	3.53725	3.78633	4.09078	4.0988	3.4801	3.5169	3.71917	4.43866	4.31596	4.34437
Jon99Ci	0.222082	0.0418182	18	12	0.262693	8.46435	8.45017	8.59252	8.51842	8.51507	8.61228	8.91891	8.87574	9.21548	8.51871	8.39798	8.46815
CG30339	0.222082	0.0418182	24	18	0.260962	2.81679	2.77644	3.21488	3.13301	2.96139	3.01472	3.22255	3.20373	3.35354	3.57327	3.33712	3.46382
Ugt37b1	0.222082	0.0418182	24	3	0.259787	4.29133	4.42575	4.59201	4.23277	4.2651	4.22423	4.03363	3.89025	4.19166	3.93385	3.88482	3.8727
CG15629	0.222082	0.0418182	24	18	0.256612	3.93744	4.23734	3.98443	4.18776	4.22027	4.32508	4.38703	4.26159	4.35671	4.60087	4.72335	4.59963
CR42839	0.222082	0.0418182	18	15	0.255161	2.41006	2.23652	2.10016	2.01336	2.04921	2.22391	2.62081	2.64503	2.54617	1.97813	2.14922	2.0259
Cpr67B	0.222082	0.0418182	24	3	0.245317	7.19634	7.35431	7.05149	6.81238	6.78492	6.79874	6.6345	6.73148	6.65549	6.65196	6.51112	6.46204
GstD8	0.222082	0.0418182	18	12	0.244837	5.63994	5.33083	5.33935	5.42712	5.07465	5.07377	5.65069	5.6148	5.6856	3.77566	4.33686	3.82616
CG18446	0.222082	0.0418182	18	3	0.242266	2.47994	2.3467	2.20502	2.42114	2.49631	2.48247	2.00408	2.12209	2.11115	2.75142	2.7246	2.56164
su(r)	0.222082	0.0418182	18	12	0.235396	4.25733	4.41047	4.13508	4.42958	4.17394	4.35312	4.78256	4.50684	4.7295	3.84935	4.32089	4.2445
CG10200	0.222082	0.0418182	24	9	0.235036	4.57722	4.48852	4.19023	4.4832	4.64798	4.66756	4.62713	4.52624	4.60553	4.23705	4.19832	4.14689
CG6675	0.222082	0.0418182	24	15	0.228041	3.9681	4.04409	4.05687	4.24822	4.32251	4.07207	4.28367	4.62756	4.40149	4.66567	4.40244	4.20628
CG5991	0.222082	0.0418182	24	15	0.221332	5.83598	5.65458	5.70725	5.71702	5.59413	5.61967	6.14659	6.1611	6.08068	5.95472	5.84127	5.7728
CR43411	0.222082	0.0418182	24	21	0.214169	4.65766	4.93067	4.78567	4.50393	4.52783	4.66513	4.60379	4.449	4.68023	5.04085	4.88664	4.90663
CG1140	0.222082	0.0418182	18	12	0.213401	5.05315	4.8642	4.85126	4.92242	4.7223	4.78095	5.16109	5.15305	5.27558	4.50086	4.69457	4.74178
CG8249	0.222082	0.0418182	18	15	0.213042	3.58047	3.66852	3.52951	3.46543	3.50987	3.42351	4.18362	4.20601	4.08543	3.3816	3.66822	3.28023
CG4408	0.222082	0.0418182	24	21	0.212331	4.59985	4.80536	4.87222	4.59528	4.3328	4.50164	4.6323	4.49316	4.49942	4.8457	4.72194	4.89212
Hsromega	0.222082	0.0418182	24	3	0.210225	4.05962	3.86733	3.98222	4.03685	4.07582	4.02016	3.54482	3.53944	3.55366	3.97262	3.83302	3.81317
CG42249	0.222082	0.0418182	24	21	0.209167	3.94671	3.63833	3.92071	3.86144	3.51105	3.7017	3.73497	3.60861	3.754	4.03471	4.0918	4.27897
mir-278	0.222082	0.0418182	24	0	0.205861	1.58199	1.6157	1.72405	1.13232	1.12317	1.42269	1.22761	1.11117	1.41083	1.31344	1.35094	1.54552
Mmp1	0.222082	0.0418182	24	15	0.20265	4.54337	4.59349	4.52966	4.71731	4.76057	4.72068	4.87839	4.96781	4.79697	4.93988	5.00372	5.00816
CG14945	0.222082	0.0418182	24	15	0.200178	4.04608	3.94172	3.91177	4.11194	4.10506	4.03399	4.31584	4.22988	4.30571	4.3945	4.25389	4.37201
CG11899	0.222082	0.0418182	24	18	0.197287	6.99309	6.94378	6.90364	6.93634	6.87821	6.90192	7.26915	7.13518	7.25587	7.01655	7.18897	7.22855
CG9498	0.222082	0.0418182	18	12	0.19662	6.22875	6.0876	6.25262	6.09077	5.93115	6.04275	6.4103	6.38496	6.35289	5.57549	5.71306	5.73816
CG6041	0.222082	0.0418182	18	12	0.195985	4.0314	3.77316	3.67074	3.77879	3.58365	3.78452	4.10788	3.94228	4.06367	3.28742	3.65597	3.66947
CG15393	0.222082	0.0418182	18	6	0.194752	1.97775	1.75897	1.7306	1.76081	1.96686	2.03439	1.45004	1.51499	1.43601	1.80507	1.75814	1.83131
CG32669	0.222082	0.0418182	24	18	0.193513	2.11942	1.97719	1.99348	2.15288	1.96779	2.14174	2.35157	2.21816	2.29786	2.35009	2.56032	2.31643
oys	0.222082	0.0418182	24	18	0.19164	5.8557	5.94006	5.99328	6.03911	6.0106	5.99152	6.20049	6.12687	6.0847	6.34248	6.38982	6.34309
CG7220	0.222082	0.0418182	18	15	0.190628	5.87962	5.76622	5.80482	5.76825	5.61003	5.70646	6.41332	6.32517	6.36132	5.83044	5.89623	5.877
CG8483	0.222082	0.0418182	18	6	0.190306	2.31058	2.30716	2.2148	2.39874	2.57972	2.34935	1.94782	1.96068	2.12402	2.62445	2.40104	2.62894
sphinx	0.222082	0.0418182	24	6	0.18977	1.65139	1.51097	1.78312	1.62688	1.60921	1.78515	1.57595	1.6398	1.30991	1.28488	1.28229	1.27353
dnr1	0.222082	0.0418182	18	12	0.187458	4.69445	4.90056	4.75158	4.77922	4.69637	4.71217	5.02555	5.07228	4.97728	4.59904	4.73503	4.64858
Phk-3	0.222082	0.0418182	24	6	0.186423	5.99616	6.14146	5.97223	6.0483	5.95416	6.14968	5.73335	5.71859	5.91977	5.873	5.75593	5.68953
squ	0.222082	0.0418182	18	15	0.186121	2.04602	1.61058	1.81594	1.60545	1.71632	1.5599	1.95601	1.87608	1.9744	1.75061	1.59593	1.78053
Mnt	0.222082	0.0418182	18	15	0.183607	3.59419	3.47779	3.28204	3.41837	3.40017	3.46323	3.92935	3.865	3.78596	3.51385	3.47138	3.49822
CG34220	0.222082	0.0418182	24	6	0.183345	11.5704	11.6709	11.5464	11.5226	11.6755	11.7162	11.4409	11.6006	11.5475	11.1121	11.2003	11.1498
CG8306	0.222082	0.0418182	24	18	0.180665	6.11025	6.0561	6.16135	6.16467	6.29364	6.13239	6.36422	6.38872	6.32209	6.62722	6.42451	6.40111
CG13912	0.222082	0.0418182	24	15	0.178362	5.30112	5.17689	5.29889	5.13566	5.08402	5.20534	5.6803	5.46897	5.50414	5.42278	5.38589	5.31636
lama	0.222082	0.0418182	24	18	0.177167	5.2558	5.39048	5.30191	5.26941	5.08899	5.13568	5.5262	5.59206	5.47369	5.4205	5.60911	5.33973
CG1516	0.222082	0.0418182	24	15	0.17577	6.65193	6.77017	6.55236	6.80088	6.66316	6.85165	7.06239	6.91472	6.96184	6.76345	7.01493	7.00851
trbl	0.222082	0.0418182	24	15	0.173629	3.91183	3.92734	3.77606	3.95505	3.81158	3.94257	4.38699	4.18983	4.30125	3.75486	4.03303	4.06247
CG13086	0.222082	0.0418182	24	15	0.172922	5.1891	5.16676	5.27331	5.22691	5.32631	5.25365	5.45607	5.44326	5.43729	5.63119	5.40767	5.62747
Spn28D	0.222082	0.0418182	24	18	0.168513	4.9355	5.11417	4.90146	5.06866	5.01012	5.05579	5.28711	5.17516	5.07719	5.26259	5.35241	5.3143
nes	0.222082	0.0418182	18	12	0.165639	5.24855	5.08601	5.21901	5.08776	5.02263	4.9809	5.38282	5.32026	5.42626	4.9091	4.88346	4.88709
CG1732	0.222082	0.0418182	24	15	0.165463	4.69224	4.64668	4.68439	4.59785	4.73994	4.68686	4.86912	5.05502	4.91963	4.95858	4.9106	4.70172
Takl1	0.222082	0.0418182	18	3	0.165077	3.28777	2.99797	3.20908	3.3166	3.239	3.27954	2.99009	2.98286	3.0622	3.40466	3.39864	3.34404
CG5315	0.222082	0.0418182	24	15	0.163881	7.83768	7.74437	7.72286	7.85894	7.9115	7.87057	8.01521	7.98238	8.03926	8.15414	8.10919	8.02756
CG9547	0.222082	0.0418182	24	15	0.162283	4.98176	5.05211	5.05455	5.17208	5.00134	5.03094	5.56251	5.33238	5.69205	5.00501	5.19965	5.19839
Cyt-b5-r	0.222082	0.0418182	18	0	0.161772	9.81754	9.92962	9.91177	9.60643	9.58237	9.59936	9.73127	9.62732	9.79967	9.59276	9.77351	9.72255
CG31886	0.222082	0.0418182	24	18	0.160519	3.29872	3.21273	3.16881	3.21565	3.22588	3.21163	3.46267	3.35084	3.39307	3.45522	3.44534	3.45104
Nep2	0.222082	0.0418182	24	3	0.159172	4.72839	4.58154	4.64589	4.42623	4.4457	4.33643	4.28151	4.37606	4.12502	4.46261	4.36261	4.20344
jbug	0.222082	0.0418182	24	6	0.151826	5.49961	5.70335	5.58279	5.48059	5.47145	5.52295	5.34365	5.39988	5.35287	4.94906	5.26468	5.3124
CG1213	0.222082	0.0418182	24	15	0.151028	7.44826	7.40408	7.27282	7.58847	7.31195	7.40234	7.83504	7.67902	7.77135	7.41165	7.51927	7.52822
Cct5	0.222082	0.0418182	18	6	0.148743	5.90417	6.09258	6.00652	6.02551	6.21688	6.22366	5.86299	5.77211	5.92461	6.02078	6.08552	6.36381
CG42754	0.222082	0.0418182	24	9	0.148415	1.22922	1.24423	1.27598	1.5519	1.603	1.49865	1.11491	1.39056	1.44321	1.23462	1.20202	1.23678
CG11029	0.222082	0.0418182	24	15	0.14785	3.92276	4.09265	3.99631	4.22733	4.17207	4.24755	4.32263	4.32798	4.31895	4.32649	4.37114	4.38583
CG14984	0.222082	0.0418182	18	9	0.147224	5.75867	5.81719	5.76436	6.07419	6.07659	5.97256	5.84873	6.0229	5.83141	6.01136	5.78727	5.6146
Gs2	0.222082	0.0418182	24	18	0.14718	8.96804	9.22545	9.18591	9.19057	9.25573	9.2734	9.39817	9.33537	9.34307	9.49865	9.4446	9.45665
rost	0.222082	0.0418182	18	0	0.146004	4.51042	4.51604	4.56606	4.25234	4.23183	4.35457	4.16721	4.35958	4.3603	4.37111	4.4024	4.22987
CG15120	0.222082	0.0418182	24	18	0.145275	3.18996	3.07168	2.90541	2.98084	3.13076	2.80179	3.1338	3.26096	3.1233	3.33487	3.22633	3.2535
Idgf5	0.222082	0.0418182	24	15	0.145206	5.80542	5.79417	5.70059	5.82897	5.73882	5.78041	6.00224	5.93627	6.02542	5.95221	6.02472	5.96098
rho-4	0.222082	0.0418182	24	15	0.144202	3.81684	3.77291	3.64539	3.91658	3.80502	3.77149	3.96216	4.07162	3.92873	3.9444	4.03018	4.02113
snoRNA:Psi28S-612	0.222082	0.0418182	24	6	0.142585	3.04215	3.20088	3.14613	3.29139	3.2248	3.42533	2.98014	2.93179	3.06108	3.08379	3.04183	2.97829
tobi	0.222082	0.0418182	24	3	0.142489	9.40623	8.98531	9.06223	8.9026	8.9597	8.96089	8.75059	8.76699	8.96353	8.7396	8.85183	8.8136
CG4496	0.222082	0.0418182	18	6	0.142318	2.08976	2.04653	2.22155	2.0689	2.33238	2.23666	1.82439	1.87566	1.85718	2.11341	2.04666	2.14584
CG6175	0.222082	0.0418182	18	15	0.141836	3.57893	3.61533	3.47152	3.47921	3.49707	3.54352	3.91675	3.87269	3.81588	3.55411	3.58082	3.52514
Clect27	0.222082	0.0418182	24	0	0.141324	6.56279	6.68779	6.62387	6.34514	6.48658	6.44511	6.29724	6.46739	6.3074	6.73081	6.50592	6.39883
PGRP-LA	0.222082	0.0418182	18	9	0.140669	4.36583	4.37698	4.25849	4.40077	4.64722	4.55613	4.55213	4.60935	4.50515	4.41195	4.46303	4.3408
CG43774	0.222082	0.0418182	24	3	0.138603	4.81311	4.45553	4.84648	4.60086	4.4995	4.57654	4.39783	4.09519	4.43102	4.45995	4.57273	4.38485
CG14205	0.222082	0.0418182	18	6	0.138001	1.20408	1.06746	1.03466	1.50516	1.20585	1.41766	1.02055	1.01448	1.05864	1.02549	1.3051	1.05995
CG2781	0.222082	0.0418182	24	15	0.137636	6.23067	6.23506	6.19773	6.34515	6.60393	6.34807	6.5292	6.67485	6.52102	6.62157	6.36932	6.30093
CG42729	0.222082	0.0418182	24	21	0.136458	5.35156	5.51433	5.49579	5.37557	5.22378	5.38326	5.26069	5.43914	5.54144	5.75802	5.63638	5.6106
CG31793	0.222082	0.0418182	18	15	0.13614	3.63269	3.55567	3.606	3.56479	3.43481	3.50072	3.82323	3.73458	3.87574	3.48045	3.61333	3.64539
CG10559	0.222082	0.0418182	18	12	0.135546	3.61112	3.38174	3.40007	3.44564	3.36829	3.38072	3.63078	3.7466	3.49294	2.94503	3.17687	3.05851
CG2604	0.222082	0.0418182	24	12	0.134552	7.36997	7.35221	7.35508	7.60875	7.65638	7.47646	7.59742	7.73975	7.50133	7.65308	7.43481	7.41608
CG12001	0.222082	0.0418182	18	6	0.13321	5.09571	5.10577	5.12823	5.10572	5.31447	5.31221	4.97874	4.92271	4.92739	5.18977	5.06723	5.09793
CG17343	0.222082	0.0418182	18	3	0.133059	3.01654	3.10627	3.05728	3.00858	3.21435	3.09396	2.84553	2.83461	2.90579	3.20276	3.18516	3.17601
Gcn2	0.222082	0.0418182	18	3	0.13277	3.56922	3.56213	3.51865	3.5654	3.55863	3.52849	3.31756	3.32579	3.37764	3.55845	3.62404	3.6357
Acsl	0.222082	0.0418182	18	12	0.132456	7.37532	7.20221	7.30342	7.188	7.21597	7.16259	7.41378	7.38979	7.40246	7.07618	7.04171	7.06152
Irk2	0.222082	0.0418182	24	18	0.132297	5.87471	5.78287	5.85145	5.74613	5.76353	5.77499	6.02125	5.97584	5.97593	6.00027	5.94865	5.86182
CG9394	0.222082	0.0418182	18	12	0.131757	4.91934	4.92658	5.0431	4.87392	4.93732	4.98358	5.18843	5.10567	5.1905	4.78332	4.93463	4.86675
CG4950	0.222082	0.0418182	24	18	0.131568	4.50945	4.7367	4.87172	4.62155	4.57909	4.6373	4.74047	4.79388	4.73435	5.08304	4.8414	4.90596
mir-281-2	0.222082	0.0418182	24	9	0.130789	7.32638	7.15275	7.12706	7.33647	7.20405	7.30148	7.22356	7.33293	7.14465	6.9543	7.02455	6.94567
CG43799	0.222082	0.0418182	24	21	0.130379	1.66587	1.73396	1.83287	1.65369	1.54621	1.78468	1.60378	1.80289	1.72435	2.02666	1.90537	2.01403
dnc	0.222082	0.0418182	24	6	0.129725	4.247	4.19938	4.24466	4.24072	4.24647	4.24396	4.12307	4.15315	4.01846	4.07456	4.0322	4.03221
CG17754	0.222082	0.0418182	24	15	0.128545	3.63636	3.58652	3.48758	3.63308	3.64701	3.63866	3.8436	3.76861	3.83213	3.59102	3.69731	3.86873
CG14823	0.222082	0.0418182	24	3	0.127387	5.98798	5.77993	5.94902	5.61721	5.72886	5.71656	5.62561	5.49661	5.67566	5.5239	5.62344	5.69516
l(1)G0469	0.222082	0.0418182	18	3	0.126824	3.4958	3.41844	3.41582	3.57146	3.47608	3.57709	3.26364	3.21691	3.39774	3.83173	3.66533	3.83247
Cctgamma	0.222082	0.0418182	18	6	0.126156	5.35005	5.49222	5.44806	5.45478	5.52846	5.54736	5.30225	5.19962	5.24857	5.3945	5.44697	5.64551
snoRNA:Psi18S-531	0.222082	0.0418182	24	3	0.126079	4.67384	4.48514	4.55905	4.46374	4.49645	4.51419	4.40408	4.43468	4.058	4.21905	4.31711	4.39515
CG2211	0.222082	0.0418182	24	21	0.124328	2.77672	2.71226	2.75722	2.75964	2.61822	2.64279	2.65664	2.49777	2.76	2.83712	2.92997	2.96929
CG3097	0.222082	0.0418182	24	15	0.1241	4.71332	4.83327	4.67962	4.83349	4.88215	4.92741	5.00862	4.99208	4.89323	5.04669	4.96307	5.05781
snoRNA:Me18S-G1358a	0.222082	0.0418182	24	9	0.123241	1.12797	1.13667	1.13045	1.32311	1.15893	1.53089	1.29078	1.39398	1.14747	1.05608	1.2387	1
GRHR	0.222082	0.0418182	18	6	0.123214	4.85017	4.9357	4.95446	5.03652	5.09723	5.09118	4.90769	4.75945	4.86227	5.18896	5.26651	5.00183
Rhp	0.222082	0.0418182	18	15	0.122797	3.8589	3.71871	3.79993	3.68524	3.6947	3.6129	3.9918	3.89472	3.81698	3.63401	3.59593	3.64423
CG11842	0.222082	0.0418182	18	12	0.122215	4.19989	4.22837	3.84338	4.24473	3.86109	4.26214	4.4012	4.26645	4.36746	4.13771	4.16499	4.0632
CtsB1	0.222082	0.0418182	24	18	0.121366	7.91359	7.93705	7.87636	7.97065	8.02558	7.92852	8.06282	8.05882	8.06488	8.16117	8.1226	8.17322
CG11839	0.222082	0.0418182	24	3	0.121315	3.12221	3.20483	3.09089	3.23753	3.37562	3.17369	2.95038	2.98818	2.95142	3.06925	3.05509	3.04797
fz2	0.222082	0.0418182	24	6	0.121308	3.9678	3.98767	3.98868	4.10062	4.16322	4.21756	3.89315	3.81636	3.87933	3.82019	3.9713	3.96329
Tim17a2	0.222082	0.0418182	24	0	0.120967	1.6495	1.52221	1.63364	1.53252	1.33847	1.29541	1.24598	1.31681	1.40686	1.45939	1.50112	1.38515
Pmm45A	0.222082	0.0418182	24	12	0.120814	4.15662	4.12081	4.28628	4.38465	4.32221	4.31078	4.48727	4.36589	4.4236	4.16486	4.1927	4.4495
Cyp4aa1	0.222082	0.0418182	24	18	0.119681	3.77949	3.86328	3.89781	3.83182	3.65782	3.87009	4.02451	3.90966	4.05578	3.97722	4.02515	4.00324
Spn27A	0.222082	0.0418182	24	18	0.119169	5.34306	5.37811	5.2121	5.3656	5.37895	5.39869	5.48724	5.52185	5.47701	5.54795	5.61401	5.55459
sano	0.222082	0.0418182	24	6	0.11891	3.74098	3.862	3.8427	3.86825	3.91679	3.8799	3.65603	3.68991	3.71257	3.62735	3.7475	3.74563
CG31365	0.222082	0.0418182	18	3	0.117843	3.31652	3.34751	3.39898	3.37836	3.37825	3.2862	3.17314	3.14454	3.2116	3.42253	3.36697	3.39705
CR34044	0.222082	0.0418182	18	3	0.11766	2.03629	2.09628	2.08326	1.93507	2.0335	2.14983	1.90016	1.89814	1.91687	2.14759	2.05673	2.13618
mthl2	0.222082	0.0418182	24	21	0.117451	2.98319	3.09677	2.93417	2.96362	2.89742	2.95346	2.92999	3.09076	2.96033	3.28855	3.15161	3.3957
CG7841	0.222082	0.0418182	18	0	0.117382	5.29571	5.32103	5.314	5.22404	5.03165	5.08741	5.20937	5.22956	5.12971	5.17837	5.28301	5.13778
CG11760	0.222082	0.0418182	24	15	0.117028	3.26764	3.31475	3.22933	3.17596	3.32644	3.33324	3.47463	3.48402	3.3864	3.64616	3.39052	3.43272
CG6776	0.222082	0.0418182	18	6	0.11621	7.30799	7.43606	7.33695	7.4216	7.52437	7.55261	7.26808	7.27742	7.27172	7.55034	7.5453	7.57152
l(2)35Bg	0.222082	0.0418182	18	6	0.115925	4.28813	4.32925	4.44766	4.44433	4.5063	4.52732	4.30905	4.25962	4.30463	4.42697	4.4006	4.57086
alphaTry	0.222082	0.0418182	24	0	0.115685	10.8799	10.9692	11.0574	10.8951	10.7276	10.9215	10.757	10.6333	10.8264	10.9401	10.9509	11.0458
CG6426	0.222082	0.0418182	18	6	0.114768	8.06789	7.94896	8.12128	7.96605	8.24174	8.13124	7.91849	7.75873	7.93581	8.22134	8.079	8.18264
CG11068	0.222082	0.0418182	18	12	0.114677	1.13721	1.23651	1.18362	1.15382	1.22284	1.31718	1.82157	1.41308	1.29291	1.2066	1.12972	1.15373
NTPase	0.222082	0.0418182	24	15	0.113691	6.26027	6.34355	6.30995	6.35089	6.26269	6.23164	6.48717	6.43713	6.47614	6.41692	6.51957	6.35994
az2	0.222082	0.0418182	18	3	0.113128	2.53945	2.51567	2.56021	2.52885	2.5067	2.56739	2.30037	2.40022	2.31681	2.57473	2.526	2.65916
Pk17E	0.222082	0.0418182	24	15	0.112508	4.25227	4.30887	4.22378	4.31472	4.31516	4.26809	4.47587	4.33966	4.409	4.45135	4.43064	4.49138
CG6405	0.222082	0.0418182	18	3	0.112446	2.24448	2.39188	2.17496	2.05595	2.2845	2.1384	2.07825	2.1231	1.85567	2.41086	2.25341	2.27076
CG9691	0.222082	0.0418182	18	6	0.111395	9.42714	9.54924	9.43506	9.5926	9.68415	9.56917	9.36568	9.49331	9.40358	9.71193	9.51621	9.45735
egr	0.222082	0.0418182	24	15	0.11081	4.51602	4.45271	4.44598	4.55478	4.5006	4.50798	4.70586	4.6378	4.59736	4.67562	4.64979	4.67231
Vdup1	0.222082	0.0418182	24	3	0.110124	5.56629	5.61103	5.68543	5.32996	5.48879	5.40478	5.34325	5.37084	5.32563	5.38891	5.2815	5.3513
Srp19	0.222082	0.0418182	24	6	0.11	5.97295	6.11213	6.10801	6.10138	6.08681	6.15693	5.93352	5.95227	5.96164	6.05779	5.92656	5.90327
Hsp60	0.222082	0.0418182	18	3	0.109555	7.35235	7.46481	7.45345	7.42153	7.50678	7.48261	7.30124	7.2666	7.30459	7.52881	7.50194	7.65653
CG42262	0.222082	0.0418182	24	15	0.109107	3.50991	3.60489	3.54007	3.69974	3.47362	3.65584	3.75	3.73627	3.73651	3.69323	3.6978	4.30663
CG31664	0.222082	0.0418182	18	6	0.108925	4.47815	4.57169	4.66501	4.69873	4.54721	4.73247	4.39317	4.48574	4.33904	4.66065	4.59766	4.67533
CG11236	0.222082	0.0418182	18	15	0.108354	5.89521	5.83509	6.0408	5.70202	5.80935	5.7452	5.9011	5.89832	5.99111	5.85786	5.81075	5.91465
CG32069	0.222082	0.0418182	18	3	0.106806	5.25664	5.20619	5.0661	5.13365	5.16027	5.22947	5.01542	4.84873	5.07843	5.18267	5.35104	5.29807
CG17681	0.222082	0.0418182	18	15	0.106335	2.03756	1.90005	2.04472	1.86584	1.8888	1.89434	2.10846	2.04648	2.01882	1.88649	1.89365	1.79134
CG7324	0.222082	0.0418182	24	18	0.105783	5.48875	5.46348	5.4471	5.47395	5.50686	5.50698	5.57419	5.53924	5.59673	5.66979	5.66677	5.74779
CG34120	0.222082	0.0418182	24	15	0.105462	4.71303	4.64587	4.77214	4.68744	4.8269	4.68607	4.88654	4.97321	4.83041	4.91229	4.79785	4.85831
alpha-Est9	0.222082	0.0418182	18	0	0.105386	5.42011	5.40451	5.29795	5.15065	5.20722	5.20549	5.18822	5.33726	5.18062	5.38786	5.26094	5.28427
CG1951	0.222082	0.0418182	18	3	0.105281	3.39359	3.32754	3.37894	3.26655	3.35877	3.36405	3.15993	3.20361	3.2204	3.32716	3.38344	3.40913
CG7294	0.222082	0.0418182	24	15	0.104744	1.41949	1.50294	1.27723	1.54263	1.45922	1.45781	1.62929	1.5107	1.66658	1.64168	1.6417	1.54529
Sk1	0.222082	0.0418182	24	18	0.104614	3.36913	3.45725	3.35997	3.42407	3.40344	3.40409	3.46434	3.61153	3.52189	3.62768	3.56291	3.52775
Hop	0.222082	0.0418182	24	3	0.104205	6.27556	6.23456	6.24178	6.23348	6.33187	6.23811	5.90332	5.87268	5.9051	6.17254	6.21136	6.27225
CG5254	0.222082	0.0418182	24	15	0.103278	5.70653	5.72808	5.69354	5.79696	5.60127	5.78179	5.9406	5.74877	5.9264	5.82278	5.84762	5.90229
RluA-1	0.222082	0.0418182	24	15	0.102431	4.62599	4.59398	4.69935	4.64134	4.58823	4.60492	4.77227	4.9226	4.79972	4.75925	4.68652	4.68097
CG7879	0.222082	0.0418182	18	6	0.102372	3.18346	3.23466	3.26042	3.26187	3.29175	3.28322	3.00571	2.97697	3.12327	3.16521	3.14192	3.23196
Hakai	0.222082	0.0418182	18	6	0.10162	3.34461	3.41342	3.47115	3.42344	3.48042	3.49795	3.30716	3.20708	3.16231	3.33733	3.41468	3.51305
apt	0.222082	0.0418182	18	9	0.101357	3.06519	3.10027	3.07556	3.18924	3.2853	3.21121	3.14654	3.2529	3.26015	3.2394	3.18839	3.11588
l(1)G0193	0.222082	0.0418182	24	15	0.101333	4.79359	4.81177	4.7483	4.85987	4.82559	4.8017	4.90201	4.98403	4.91219	4.99838	4.97067	4.93512
Sap-r	0.222082	0.0418182	24	15	0.101195	8.57338	8.50471	8.51103	8.57671	8.63872	8.56975	8.7462	8.64196	8.68108	8.698	8.72454	8.77387
CG13364	0.222082	0.0418182	24	3	0.100528	6.93764	7.09387	7.06616	6.90646	7.02453	7.04598	6.79658	6.81977	6.86647	7.0588	6.85688	6.93389
CG3773	0.222082	0.0418182	18	3	0.099037	3.60858	3.53166	3.60952	3.62276	3.54884	3.56241	3.38538	3.46852	3.434	3.67436	3.59842	3.6748
wfs1	0.222082	0.0418182	18	6	0.0989583	3.04483	3.14223	3.0387	3.13004	3.11725	3.20773	2.92075	2.96452	2.93314	3.04223	3.18801	3.18579
TRAM	0.222082	0.0418182	18	6	0.0988178	4.52189	4.28192	4.31827	4.48441	4.35078	4.42088	4.24045	4.24738	4.18495	4.34285	4.41976	4.39233
CG5162	0.222082	0.0418182	24	18	0.0986899	8.13178	8.18029	8.21568	7.90788	8.12075	7.99431	8.17739	8.25973	8.15757	8.47383	8.16991	8.31762
CG6362	0.222082	0.0418182	24	6	0.0986638	1.75078	1.85028	1.76899	1.92118	1.86383	1.827	1.64819	1.73976	1.68436	1.67743	1.75627	1.6857
Rip11	0.222082	0.0418182	24	15	0.0985157	4.97941	5.02525	5.02528	5.10737	5.07015	4.9758	5.22233	5.19329	5.09796	5.12358	5.15515	5.20461
CG13365	0.222082	0.0418182	18	6	0.0985008	6.61453	6.89229	6.79543	6.93405	6.88248	6.93361	6.76724	6.7527	6.74318	6.89853	6.8497	6.79137
bt	0.222082	0.0418182	24	6	0.0982491	6.76507	6.74277	6.8053	6.9881	6.66261	6.92919	6.72973	6.80189	6.7241	6.60868	6.60501	6.54807
CG5516	0.222082	0.0418182	18	6	0.0974603	4.45701	4.33231	4.45425	4.45707	4.5151	4.5369	4.35809	4.32567	4.31313	4.57504	4.38916	4.4538
CG6904	0.222082	0.0418182	18	15	0.0974479	6.93038	7.01008	6.91572	6.9006	6.76644	6.84693	7.09529	7.01193	6.97261	6.92348	7.09025	6.92971
CG10344	0.222082	0.0418182	24	0	0.0972806	2.75701	2.62057	2.80504	2.603	2.62803	2.55927	2.62092	2.4678	2.54186	2.61552	2.69833	2.75069
CR43801	0.222082	0.0418182	18	6	0.0971003	1.7662	1.76221	1.88358	1.80022	1.92283	1.80612	1.66248	1.62888	1.62945	1.76752	1.71054	1.80558
CG13484	0.222082	0.0418182	18	6	0.0970709	4.10742	4.22576	4.1276	4.23974	4.25097	4.21556	3.96952	4.03988	4.10246	4.27583	4.12603	4.11401
CG7461	0.222082	0.0418182	18	15	0.09672	7.14755	7.15974	7.17287	7.0586	6.95284	6.97075	7.25555	7.17005	7.02816	6.99301	7.11835	6.98667
PQBP1	0.222082	0.0418182	24	3	0.0966087	3.45213	3.4851	3.49293	3.38454	3.52759	3.37022	3.15431	3.18532	3.36436	3.44956	3.26666	3.39629
CG32036	0.222082	0.0418182	18	3	0.0962373	1.44684	1.62907	1.49614	1.55061	1.41427	1.57925	1.36004	1.40174	1.36133	1.57179	1.68621	1.55586
CG13624	0.222082	0.0418182	24	15	0.0961718	3.97189	3.88531	3.6888	3.88765	3.85844	3.93274	4.16361	4.17433	4.06816	3.90842	3.94156	3.94393
CG3570	0.222082	0.0418182	18	6	0.0959535	3.08703	3.13146	3.14455	3.22272	3.15196	3.15516	3.00923	2.88588	2.95545	3.048	3.12251	3.23674
CG43202	0.222082	0.0418182	24	9	0.0958398	3.49357	3.36304	3.54108	3.65784	3.43667	4.13835	3.42988	3.45731	3.60723	3.32135	3.31555	3.32823
Pvf2	0.222082	0.0418182	18	6	0.0942725	2.15477	2.11224	2.08427	2.26244	2.23203	2.26396	1.88753	2.13064	2.11911	2.25721	2.28507	2.21843
CG5885	0.222082	0.0418182	18	6	0.0940762	6.41887	6.31627	6.37184	6.4429	6.34547	6.46112	6.2083	6.21242	6.12519	6.40407	6.333	6.3724
CG8177	0.222082	0.0418182	18	15	0.0939616	4.07339	4.13038	4.12208	3.98285	3.94917	4.09424	4.18607	4.14011	4.28412	4.05368	4.11942	4.21537
CG7601	0.222082	0.0418182	18	0	0.0936643	4.68726	4.70069	4.67088	4.512	4.6442	4.53842	4.54293	4.53672	4.58737	4.61882	4.61755	4.55871
Obp18a	0.222082	0.0418182	24	21	0.0936493	5.06385	5.1978	5.14721	5.06932	5.0614	5.13481	5.07341	5.12422	5.14959	5.39473	5.47173	5.29332
Rh6	0.222082	0.0418182	18	12	0.0936393	1.197	1.0642	1.08104	1.08931	1.08305	1.10998	1.32189	1.20721	6.04997	1.06263	1.07087	1.0966
CG4911	0.222082	0.0418182	24	9	0.0934547	4.29678	4.06888	4.14913	4.31487	4.28141	4.33968	4.21527	4.18274	4.11978	4.13959	3.87182	4.10689
nod	0.222082	0.0418182	18	6	0.0933737	2.805	2.92673	2.81846	2.81341	3.06308	3.02627	2.72837	2.75042	2.73869	2.76276	2.88073	2.93131
CG2812	0.222082	0.0418182	24	3	0.0933543	2.73225	2.6933	2.63762	2.58955	2.64877	2.66535	2.33422	2.28226	2.50237	2.56452	2.5958	2.71553
Cad86C	0.222082	0.0418182	24	3	0.0922366	2.55136	2.63178	2.69792	2.63753	2.67592	2.54916	2.4094	2.49114	2.38996	2.60445	2.55627	2.54885
CG7053	0.222082	0.0418182	24	18	0.0922173	4.47842	4.5192	4.49151	4.55669	4.52713	4.51105	4.62248	4.57562	4.59376	4.70933	4.65699	4.7437
Atg9	0.222082	0.0418182	24	15	0.0919533	4.3256	4.34606	4.34347	4.40728	4.41061	4.40833	4.47657	4.41244	4.53427	4.50213	4.5361	4.56886
CG8712	0.222082	0.0418182	18	3	0.0918484	2.3782	2.45046	2.37018	2.35418	2.3029	2.19262	2.1784	2.2483	2.21661	2.40325	2.27109	2.46482
mio	0.222082	0.0418182	24	15	0.0916537	2.87902	2.93206	2.89546	2.94373	2.89812	2.94264	3.04526	2.9801	3.05729	2.98902	3.07552	3.141
RhoL	0.222082	0.0418182	24	12	0.0915386	4.97172	4.77861	4.80063	4.92033	4.93418	4.89463	5.04274	5.08524	5.08746	4.89546	4.90273	4.86897
CR32194	0.222082	0.0418182	24	3	0.0911521	1.80732	1.76285	1.80589	1.64733	1.70439	1.78681	1.58855	1.58973	1.67891	1.57401	1.62528	1.71227
CG14893	0.222082	0.0418182	18	0	0.09086	1.36106	1.20176	1.23977	1.07065	1.16222	1.02123	1.16867	1.20598	1.16906	1.08629	1.32633	1.17839
vkg	0.222082	0.0418182	24	15	0.0905036	4.61533	4.70304	4.67196	4.70401	4.78562	4.75005	4.80994	4.84094	4.79984	4.73675	4.89438	4.89093
CG2540	0.222082	0.0418182	18	6	0.0904996	3.25157	3.3323	3.23155	3.34268	3.27186	3.37987	3.0672	3.15963	3.13239	3.36938	3.31528	3.39472
CG4908	0.222082	0.0418182	24	21	0.0896991	3.64204	3.64037	3.73112	3.62417	3.67287	3.52668	3.57138	3.70876	3.61701	3.92558	3.84736	3.77344
Spn5	0.222082	0.0418182	24	18	0.0896657	4.58365	4.69466	4.56019	4.63533	4.67451	4.64523	4.68372	4.6973	4.681	4.82474	4.81095	4.82687
CG8388	0.222082	0.0418182	18	6	0.0888976	2.59169	2.58988	2.64101	2.7156	2.69282	2.62311	2.53592	2.44538	2.41531	2.57834	2.56699	2.6445
CG3501	0.222082	0.0418182	18	6	0.0887821	5.04543	5.0065	5.00237	5.15056	5.10268	5.12793	5.00115	4.97447	4.93184	5.30524	5.14791	5.24618
CG4447	0.222082	0.0418182	24	0	0.0882747	3.15163	3.09433	3.16127	3.10311	3.10554	3.00173	2.84179	2.95319	2.92915	3.15697	3.08443	3.08117
S6k	0.222082	0.0418182	24	15	0.0881391	4.96164	4.92784	4.90161	4.93242	4.89567	4.95869	5.12866	5.01413	5.06694	4.98619	5.05251	5.08784
btz	0.222082	0.0418182	18	6	0.0880613	4.08253	4.20293	4.0773	4.20054	4.22136	4.17378	4.05106	4.04924	3.99271	4.07936	4.15661	4.2271
futsch	0.222082	0.0418182	24	6	0.0877683	3.49722	3.51487	3.55497	3.5655	3.41457	3.62875	3.43898	3.40623	3.51012	3.20973	3.34442	3.43324
su(s)	0.222082	0.0418182	24	3	0.0873137	4.07613	4.14598	4.02289	4.07958	4.09231	4.12201	3.89615	3.88877	3.91694	3.99553	4.0432	4.05963
Asx	0.222082	0.0418182	24	3	0.0873098	3.36665	3.35429	3.37986	3.32708	3.33585	3.37977	3.22196	3.25636	3.24768	3.21065	3.1975	3.26743
Pcp	0.222082	0.0418182	24	3	0.0871947	1.41977	1.33159	1.47898	1.39325	1.69406	1.42979	1.30134	1.2582	1.15309	1.36582	1.36224	1.32176
tan	0.222082	0.0418182	24	0	0.0864107	3.26039	3.20521	3.30096	3.18788	3.18508	3.20602	2.93737	3.0971	3.04009	3.32263	3.16136	3.23376
CG34183	0.222082	0.0418182	18	3	0.0863841	3.62191	3.57615	3.63381	3.76779	3.5766	3.69876	3.4369	3.51428	3.5697	3.79836	3.71865	3.81989
ergic53	0.222082	0.0418182	24	3	0.0862136	5.7137	5.58211	5.59626	5.70993	5.65044	5.69974	5.48075	5.52788	5.44583	5.61742	5.57845	5.54513
CG4707	0.222082	0.0418182	24	3	0.0860485	2.47644	2.6052	2.56454	2.56104	2.47849	2.54306	2.24005	2.33645	2.32604	2.54573	2.45387	2.536
shep	0.222082	0.0418182	24	9	0.085889	4.56219	4.43567	4.4576	4.56939	4.46215	4.56072	4.50608	4.54471	4.50385	4.35935	4.25831	4.38201
opm	0.222082	0.0418182	18	3	0.0858114	5.12357	5.26896	5.24492	5.20947	5.26345	5.33685	5.10274	5.17193	5.06832	5.45054	5.33205	5.48863
nej	0.222082	0.0418182	24	6	0.0856309	3.03603	3.01265	3.02735	3.11892	2.98945	3.11819	2.96785	2.85889	2.95613	2.80553	2.95314	3.00655
Slu7	0.222082	0.0418182	18	3	0.0855655	3.61992	3.70166	3.57807	3.68333	3.6131	3.65498	3.50879	3.49209	3.51515	3.73809	3.6677	3.6986
Fib	0.222082	0.0418182	18	3	0.0851739	3.80002	3.89854	3.68758	3.67635	3.66886	3.81358	3.67888	3.64644	3.64692	3.73756	3.82429	4.03144
CG34409	0.222082	0.0418182	24	9	0.0849357	2.26954	2.28127	2.37655	2.46035	2.36184	2.45637	2.43404	2.17552	2.28476	2.14913	2.15683	2.27974
Imp	0.222082	0.0418182	24	12	0.084909	2.53996	2.44225	2.37878	2.5613	2.47945	2.59296	2.58912	2.58326	2.58559	2.42023	2.47243	2.46918
CG1602	0.222082	0.0418182	24	3	0.0845885	1.89418	1.94679	2.01079	1.89343	1.98269	1.89298	1.65681	1.75367	1.77012	1.91085	1.83979	1.92726
Cralbp	0.222082	0.0418182	18	12	0.083944	2.77039	2.73853	2.72094	2.75066	2.8316	2.75987	3.12157	2.83966	3.03733	2.72487	2.77966	2.57277
l(1)G0320	0.222082	0.0418182	18	6	0.0831703	6.95105	6.89218	6.89362	7.00741	6.9249	6.99786	6.79433	6.72635	6.77456	6.94997	7.01613	7.00088
Sry-beta	0.222082	0.0418182	18	6	0.0831689	3.25775	3.30923	3.31075	3.41702	3.35376	3.3063	3.12132	3.20981	3.13267	3.35259	3.37139	3.41972
CG15414	0.222082	0.0418182	24	15	0.0830666	1.21878	1.20683	1.17839	1.22387	1.2472	1.19254	1.26673	1.28496	1.39687	1.33434	1.33604	1.3422
CCS	0.222082	0.0418182	18	6	0.0826566	4.99836	4.89108	4.95218	5.00798	5.07013	4.95377	4.86982	4.76629	4.80945	4.89831	4.89005	4.94805
GM130	0.222082	0.0418182	24	3	0.082245	4.31983	4.21511	4.24805	4.32109	4.29495	4.24794	4.09605	4.13438	4.05396	4.22226	4.18762	4.24587
Cad96Ca	0.222082	0.0418182	24	12	0.0820129	3.39057	3.49623	3.45012	3.49518	3.48474	3.54759	3.67773	3.72541	3.56716	3.43266	3.4995	3.42089
Scsalpha	0.222082	0.0418182	24	15	0.0818026	8.40071	8.47433	8.40165	8.54325	8.41575	8.40504	8.5895	8.60129	8.51692	8.58698	8.53852	8.44576
CG9302	0.222082	0.0418182	18	6	0.0814308	3.71351	3.73684	3.76635	3.76991	3.88219	3.73484	3.55751	3.70796	3.59835	3.84736	3.73847	3.77876
CG4622	0.222082	0.0418182	18	6	0.0812011	2.95858	3.04797	3.04131	3.10445	3.04	3.06626	2.9135	2.86032	2.90635	3.09454	3.01002	3.09026
CG15356	0.222082	0.0418182	18	6	0.0812007	3.11346	3.17759	3.22676	3.20705	3.26686	3.22829	3.03775	3.07784	3.10239	3.09476	3.12312	3.20407
Cyp6d4	0.222082	0.0418182	18	3	0.0811885	3.49897	3.32241	3.43723	3.52664	3.45282	3.45734	3.28742	3.22167	3.42578	3.54905	3.68342	3.645
CG14073	0.222082	0.0418182	24	9	0.0808439	3.22675	3.16249	3.16456	3.28167	3.28167	3.32324	3.29702	3.28655	3.26334	3.12271	3.18105	3.19772
Rpb7	0.222082	0.0418182	18	3	0.0807622	3.74397	3.71084	3.73639	3.79009	3.82164	3.6529	3.61664	3.62975	3.63726	3.91567	3.82958	3.78899
CG7987	0.222082	0.0418182	24	3	0.0807345	4.39055	4.39401	4.48788	4.45416	4.46512	4.43551	4.24389	4.28019	4.27833	4.35221	4.37264	4.4161
CG8605	0.222082	0.0418182	24	0	0.0806787	3.77542	3.74543	3.75649	3.7163	3.75955	3.6599	3.57107	3.54111	3.52793	3.72467	3.70514	3.79718
Brd8	0.222082	0.0418182	18	6	0.0805764	2.61475	2.64085	2.60557	2.71105	2.63978	2.62602	2.42557	2.40051	2.52476	2.57445	2.62592	2.64988
CG10959	0.222082	0.0418182	18	6	0.0805236	1.63877	1.72905	1.60218	1.69177	1.71983	1.83297	1.56007	1.56868	1.59452	1.70185	1.73566	1.7487
m2	0.222082	0.0418182	18	3	0.0804838	1.54396	1.75962	1.69204	1.69573	1.71271	1.58185	1.60882	1.52081	1.57453	1.93367	1.83682	1.81494
mRpL11	0.222082	0.0418182	18	6	0.0803338	4.40266	4.52366	4.5418	4.61418	4.59742	4.60126	4.43631	4.54216	4.46065	4.61706	4.56555	4.57658
Tapdelta	0.222082	0.0418182	18	6	0.0802742	7.03259	7.01777	7.04356	7.09792	7.01595	7.11596	6.88362	6.8328	6.87392	7.11696	7.0688	7.09104
CG34294	0.222082	0.0418182	24	9	0.0802322	1.91595	2.09647	1.9761	2.00247	2.13736	2.06396	2.05426	1.98801	2.04572	1.90976	1.80947	1.93652
Bzd	0.222082	0.0418182	18	3	0.079929	3.64	3.62516	3.59944	3.72187	3.6003	3.65227	3.55501	3.48727	3.41605	3.72728	3.68177	3.77736
Apc2	0.222082	0.0418182	18	3	0.0797046	1.41308	1.5395	1.44993	1.46423	1.4353	1.45304	1.34032	1.3168	1.33159	1.48646	1.46474	1.49284
Saf6	0.222082	0.0418182	18	3	0.0796463	2.6265	2.57544	2.53932	2.64317	2.61895	2.61234	2.48841	2.47203	2.50632	2.6602	2.70703	2.64042
CG5815	0.222082	0.0418182	18	6	0.0795876	3.2022	3.25784	3.20155	3.22809	3.29458	3.26948	2.98674	3.04017	3.07414	3.20568	3.1737	3.16035
CG1234	0.222082	0.0418182	18	3	0.0794129	3.32903	3.32813	3.35144	3.30305	3.37826	3.38182	3.21582	3.15894	3.25357	3.43436	3.37692	3.38672
CR43683	0.222082	0.0418182	24	18	0.0793002	1.94711	2.00068	2.00868	1.95899	2.03181	1.89481	2.11321	2.05887	2.0543	2.13068	2.01291	2.1883
barr	0.222082	0.0418182	18	6	0.0792774	2.4016	2.48713	2.47423	2.4565	2.54023	2.53144	2.37947	2.37587	2.2518	2.57618	2.4919	2.4266
WASp	0.222082	0.0418182	24	15	0.0792543	3.95556	3.97467	3.99796	4.11732	4.07746	4.134	4.13684	4.15805	4.16023	4.10761	4.16781	4.23886
ClC-a	0.222082	0.0418182	18	15	0.079047	4.92435	4.85207	4.90615	4.85312	4.82091	4.85231	5.04603	4.97233	4.96571	4.77877	4.85022	4.87066
LSm1	0.222082	0.0418182	18	6	0.0789457	4.61879	4.62111	4.62921	4.69271	4.63189	4.74086	4.479	4.53867	4.56137	4.80115	4.5992	4.71096
CG13671	0.222082	0.0418182	18	3	0.0788302	3.44533	3.4598	3.50107	3.43101	3.5024	3.55773	3.36154	3.28597	3.41603	3.58823	3.53082	3.53739
CG4074	0.222082	0.0418182	24	3	0.0787153	3.46286	3.53374	3.60327	3.52658	3.54317	3.5296	3.41756	3.37898	3.33674	3.5395	3.42328	3.43158
p53	0.222082	0.0418182	18	3	0.0786499	3.22455	3.17312	3.24326	3.23085	3.09226	3.21402	3.14892	3.06849	2.99641	3.27509	3.17341	3.28274
fy	0.222082	0.0418182	18	3	0.0786086	2.26379	2.32507	2.28819	2.11473	2.29818	2.2259	2.15723	2.20882	2.09307	2.33734	2.23207	2.35206
e(y)2	0.222082	0.0418182	18	3	0.0784429	4.31247	4.40403	4.49291	4.34097	4.45284	4.32723	4.28642	4.3428	4.189	4.6412	4.45327	4.52722
CG13322	0.222082	0.0418182	18	3	0.0781443	3.12015	3.07956	3.20626	3.13545	3.11508	3.11138	2.96905	2.95979	3.05796	3.15807	3.12084	3.18292
GluRIIC	0.222082	0.0418182	24	3	0.0778067	3.42244	3.2617	3.35163	3.29873	3.34464	3.2583	3.23923	3.11762	3.23594	3.17787	3.27524	3.23327
CG10166	0.222082	0.0418182	18	3	0.0777432	5.70662	5.61356	5.64957	5.6072	5.6496	5.72775	5.54218	5.53963	5.51423	5.82352	5.71275	5.67899
CG8060	0.222082	0.0418182	18	6	0.0776914	2.77291	2.81509	2.87238	2.86149	2.92496	2.81687	2.66036	2.66313	2.7086	2.79799	2.81345	2.88376
MED31	0.222082	0.0418182	24	3	0.0776168	4.79394	4.86264	4.86605	4.73119	4.8083	4.92914	4.68178	4.61833	4.71517	4.79359	4.7252	4.82247
CG8949	0.222082	0.0418182	24	9	0.0770401	3.68821	3.78994	3.81211	3.81857	3.90714	3.92006	3.8999	3.81482	3.89369	3.67139	3.76552	3.89233
l(2)35Bc	0.222082	0.0418182	24	3	0.0768282	2.54331	2.54458	2.5324	2.48659	2.5781	2.4982	2.30707	2.34285	2.28798	2.56507	2.48653	2.46083
snoRNA:Dek-a	0.222082	0.0418182	18	6	0.0766705	1.37112	1.4427	1.37773	1.4225	1.4524	1.43478	1.3245	1.13038	1.2564	1.40309	1.26691	1.4066
CG7565	0.222082	0.0418182	18	3	0.0766679	3.17319	3.16215	3.21184	3.14551	3.13454	3.19209	3.00937	3.02611	3.08256	3.18818	3.17182	3.20949
CG33189	0.222082	0.0418182	24	6	0.0765122	3.26983	3.13072	3.19045	3.33523	3.24533	3.18134	3.16213	3.17425	3.06466	2.90133	3.12388	3.13945
CG8026	0.222082	0.0418182	24	18	0.0764188	5.92714	5.95881	5.92059	5.80504	5.81201	5.86099	6.01136	6.01565	5.99642	5.95586	6.0311	5.93469
grh	0.222082	0.0418182	18	6	0.0761228	3.49385	3.43379	3.51201	3.48702	3.61775	3.51224	3.40458	3.36998	3.29402	3.61394	3.43809	3.60366
Sec61gamma	0.222082	0.0418182	24	0	0.075972	5.93646	5.83865	5.91284	5.87537	5.81751	5.91189	5.64976	5.70271	5.70494	5.91078	5.91124	5.87855
alpha-Man-IIb	0.222082	0.0418182	24	6	0.0758795	2.74006	2.75572	2.78598	2.7411	2.81676	2.7315	2.60582	2.70175	2.73095	2.63596	2.61112	2.63615
CG18371	0.222082	0.0418182	18	9	0.075872	1.2274	1.10594	1.10107	1.38737	1.21506	1.28892	1.18523	1.32983	1.17894	1.17333	1.1777	1.17496
Hsc70Cb	0.222082	0.0418182	18	6	0.0757538	5.96696	5.92163	5.91503	5.98607	6.02126	5.97493	5.69381	5.68886	5.68135	5.82399	5.86822	5.91969
CG2991	0.222082	0.0418182	18	12	0.0756512	5.39925	5.38328	5.33829	5.36222	5.37932	5.34293	5.50624	5.46756	5.49468	5.29531	5.35275	5.33175
CG18628	0.222082	0.0418182	18	9	0.0753704	1.66285	1.66003	1.67356	1.76944	1.85653	1.92521	1.63374	1.70894	1.74559	1.57484	1.70154	1.68819
Lsm10	0.222082	0.0418182	24	3	0.0751853	3.53368	3.33713	3.41332	3.29934	3.31178	3.41048	3.31758	3.17376	3.20508	3.31327	3.2705	3.27458
CG5802	0.222082	0.0418182	24	0	0.0747751	4.7936	4.71279	4.70159	4.68907	4.6506	4.74068	4.52003	4.52594	4.53221	4.68523	4.71012	4.75588
CG10277	0.222082	0.0418182	24	18	0.0747302	5.21037	5.24179	5.15592	5.24355	5.26615	5.20533	5.32297	5.25485	5.28444	5.38238	5.34379	5.37037
CG31472	0.222082	0.0418182	18	12	0.0746351	5.74784	5.71637	5.72823	5.80113	5.79017	5.68818	5.83574	5.85926	5.84565	5.79616	5.65671	5.65231
bin3	0.222082	0.0418182	24	6	0.0745731	3.84072	3.84475	3.77905	3.94638	3.87875	3.885	3.77399	3.75077	3.72037	3.67543	3.78541	3.81561
CG8281	0.222082	0.0418182	18	3	0.0743131	4.02099	3.97598	4.07838	4.0368	4.07931	3.98616	3.96411	3.9159	3.86858	4.17167	4.07228	4.1398
CG2543	0.222082	0.0418182	18	15	0.073988	2.94678	2.92871	2.91559	2.91304	2.92199	2.8429	3.15211	3.12865	3.17093	2.96705	2.92845	3.0071
CG6051	0.222082	0.0418182	24	12	0.073987	4.25453	4.32566	4.23492	4.35728	4.34869	4.29697	4.49452	4.44224	4.40942	4.20521	4.33573	4.37535
CG2023	0.222082	0.0418182	24	0	0.0736436	3.89017	3.83159	3.74837	3.76538	3.71179	3.75751	3.63324	3.5742	3.69995	3.80273	3.67987	3.81502
CG3508	0.222082	0.0418182	18	6	0.0730931	3.89947	3.99543	3.89898	3.97688	4.00284	4.01963	3.88456	3.87502	3.8618	4.04437	3.98862	3.98232
CG14817	0.222082	0.0418182	24	0	0.0730091	6.83108	6.88381	6.91263	6.81495	6.74542	6.83751	6.7046	6.75832	6.74011	6.97014	6.84602	6.77362
skap	0.222082	0.0418182	24	18	0.0730068	8.89588	8.93347	8.8992	8.9472	8.83592	8.82791	8.9722	8.94318	8.93363	9.10575	9.07325	8.9416
blot	0.222082	0.0418182	24	12	0.072961	3.31442	3.15791	3.21014	3.33586	3.36677	3.35871	3.27818	3.37782	3.43548	3.25665	3.30922	3.26247
fz3	0.222082	0.0418182	24	18	0.0729306	2.13656	2.26539	2.19989	2.11335	2.20901	2.10612	2.31963	2.22696	2.26648	2.21579	2.26757	2.32973
CG8560	0.222082	0.0418182	18	3	0.0728657	4.55848	4.82644	4.55966	4.55435	4.54608	4.66567	4.47403	4.47394	4.49408	4.62685	4.66405	4.6638
f-cup	0.222082	0.0418182	18	6	0.0720848	4.06838	4.07427	4.10939	4.10803	4.23462	4.12224	3.90971	4.01256	4.00608	4.2907	4.14252	4.13005
wash	0.222082	0.0418182	18	6	0.0719967	3.55548	3.56161	3.59325	3.6044	3.74134	3.55868	3.38693	3.52334	3.45366	3.64765	3.59012	3.64261
CG17556	0.222082	0.0418182	24	3	0.0718956	3.96885	3.93308	3.83024	3.82638	3.83477	3.82996	3.67505	3.72681	3.89191	3.78467	3.75049	3.79245
CG6144	0.222082	0.0418182	18	3	0.0717603	3.43396	3.4656	3.52471	3.49093	3.3926	3.51343	3.27732	3.3318	3.44642	3.60811	3.52161	3.51636
CG4788	0.222082	0.0418182	18	6	0.0715206	2.53947	2.60278	2.51275	2.62568	2.60512	2.52511	2.38656	2.39006	2.42439	2.60925	2.57319	2.61687
CG15128	0.222082	0.0418182	24	9	0.0715169	1.20365	1.07774	1.12618	1.20647	1.19252	1.21036	1.11497	1.44531	1.17368	1.07451	1.07056	1.09345
His3.3A	0.222082	0.0418182	18	6	0.0715163	7.07517	7.19395	7.10868	7.13884	7.2524	7.19542	7.0579	7.06557	7.07919	7.26821	7.13324	7.18644
CG32068	0.222082	0.0418182	24	21	0.0713745	7.87846	7.80525	7.87125	7.80963	7.75146	7.79266	7.85755	7.74504	7.90442	7.97194	7.96756	7.92239
CG9346	0.222082	0.0418182	18	3	0.0713029	3.9412	3.99766	4.0179	3.90827	3.98622	4.03839	3.87121	3.89898	3.86554	4.01373	4.00132	4.07635
CG5706	0.222082	0.0418182	18	3	0.0707311	3.9636	3.92176	3.97027	3.97953	3.94445	4.00536	3.84442	3.86161	3.86561	4.00181	4.02953	4.12388
Pat1	0.222082	0.0418182	24	18	0.0706127	4.32383	4.3374	4.34037	4.37934	4.34943	4.33191	4.444	4.42351	4.38486	4.43028	4.50051	4.50616
CG7979	0.222082	0.0418182	24	18	0.0705676	4.66826	4.56625	4.53105	4.60231	4.53395	4.52758	4.63351	4.67382	4.60781	4.72978	4.72177	4.61343
CG10932	0.222082	0.0418182	18	15	0.0704531	5.98884	6.01853	6.12563	5.94065	5.92631	5.94737	6.09913	6.03109	6.04029	5.97879	5.99263	6.05923
crp	0.222082	0.0418182	24	15	0.0703965	4.60444	4.62034	4.49628	4.73929	4.74014	4.69137	4.842	4.71758	4.75689	4.73184	4.74122	4.76977
CG9589	0.222082	0.0418182	24	3	0.0703629	1.2891	1.30763	1.33671	1.30151	1.37466	1.36932	1.2504	1.19582	1.20097	1.26892	1.25624	1.23397
CG14220	0.222082	0.0418182	18	6	0.0703356	3.59214	3.7468	3.62818	3.78314	3.68377	3.72215	3.63153	3.5843	3.5228	3.68952	3.64469	3.67873
CG18563	0.222082	0.0418182	18	6	0.0703209	1.85751	1.87966	1.87945	2.14992	1.89976	2.46122	1.80711	1.82526	1.9285	2.19853	2.02923	2.09598
LSm3	0.222082	0.0418182	24	3	0.070183	3.49053	3.63315	3.52819	3.48087	3.51439	3.57094	3.37308	3.46715	3.32682	3.50436	3.43348	3.49961
Vps16A	0.222082	0.0418182	18	3	0.0700601	4.08015	4.11146	4.14632	4.11746	4.11757	4.16691	4.01238	4.00247	4.03504	4.21195	4.15793	4.21558
CG7172	0.222082	0.0418182	18	6	0.0700065	5.38782	5.45472	5.45978	5.48645	5.50797	5.45552	5.27596	5.33933	5.33895	5.55135	5.48661	5.41193
l(1)G0136	0.222082	0.0418182	18	6	0.0697293	6.75103	6.80125	6.76647	6.87902	6.82264	6.81818	6.70851	6.71956	6.70947	6.97652	6.88353	6.75928
Mbs	0.222082	0.0418182	24	6	0.0695877	5.48615	5.52093	5.46286	5.42824	5.53239	5.52834	5.39283	5.50151	5.39007	5.37597	5.38807	5.40679
CG30389	0.222082	0.0418182	24	6	0.0690724	4.31296	4.38068	4.40703	4.31376	4.46277	4.43433	4.31696	4.26887	4.35918	4.21736	4.29158	4.28171
Tango9	0.222082	0.0418182	24	18	0.0689905	6.07565	5.97933	6.02059	6.02982	5.9682	5.97567	6.04195	6.01933	6.14746	6.1711	6.11836	6.12091
l(2)dtl	0.222082	0.0418182	24	0	0.0689191	2.08444	2.25621	2.21906	2.19918	2.16062	2.1387	2.09996	2.05307	2.04021	2.19929	2.2004	2.24993
Sclp	0.222082	0.0418182	18	0	0.0688669	4.47387	4.65675	4.49776	4.3629	4.34998	4.4071	4.4541	4.46029	4.53033	4.46997	4.51357	4.60242
CG17119	0.222082	0.0418182	24	15	0.0688191	2.6994	2.52811	2.67186	2.72128	2.77943	2.74838	2.87115	2.75438	2.82457	2.75607	2.87115	2.73713
Atx2	0.222082	0.0418182	18	6	0.0684943	4.38951	4.44859	4.47902	4.51534	4.53765	4.54123	4.43055	4.34534	4.44437	4.34484	4.51003	4.51168
CG9630	0.222082	0.0418182	18	3	0.0684636	3.05926	3.11633	3.09486	3.10776	3.08619	3.06686	2.91724	2.99209	2.98947	3.08137	3.17713	3.17147
Arpc3A	0.222082	0.0418182	18	3	0.0684039	3.99087	4.03469	4.05409	3.95092	4.07806	3.93966	3.89455	3.85418	3.93896	4.06647	3.99964	4.07481
CG4467	0.222082	0.0418182	18	12	0.068349	3.24473	3.19105	3.28614	3.20441	3.17397	3.35265	3.30107	3.30746	3.55637	3.06714	3.01521	3.18807
CG14543	0.222082	0.0418182	24	3	0.0676865	4.0883	4.11172	4.05156	4.05357	4.04939	4.13078	3.81545	3.89892	4.02324	4.04387	3.92386	4.06905
CG3589	0.222082	0.0418182	24	0	0.0676731	3.84077	3.85131	3.94281	3.84274	3.84123	3.80291	3.73323	3.64728	3.74679	3.82289	3.87269	3.91001
Fcp3C	0.222082	0.0418182	24	3	0.0676536	1.80247	1.85802	1.8209	1.73528	1.81711	1.84543	1.76922	1.71721	1.67365	1.71823	1.71465	1.77995
CG8944	0.222082	0.0418182	24	6	0.0673938	2.54065	2.50415	2.52312	2.56003	2.54738	2.54561	2.38844	2.42758	2.45561	2.45722	2.42723	2.51248
CG3368	0.222082	0.0418182	18	3	0.0672693	3.34204	3.36304	3.38137	3.39655	3.36015	3.41271	3.23637	3.24691	3.29873	3.40157	3.46753	3.54448
Syb	0.222082	0.0418182	18	6	0.0671669	7.50754	7.51685	7.50505	7.53898	7.58573	7.61594	7.40824	7.43625	7.49074	7.54165	7.47442	7.49608
Vps36	0.222082	0.0418182	18	3	0.0668327	3.98185	4.1682	4.1032	4.15654	4.10739	4.11726	3.91787	4.02274	4.02434	4.26304	4.22748	4.24465
CG7544	0.222082	0.0418182	18	3	0.0666737	2.68897	2.82829	2.84587	2.72513	2.78532	2.67587	2.63413	2.69103	2.62709	2.86775	2.80408	2.81772
SoYb	0.222082	0.0418182	18	6	0.0665135	1.70213	1.67082	1.68641	1.81049	1.71674	1.80425	1.68364	1.6797	1.61597	1.69559	1.67294	1.73483
omd	0.222082	0.0418182	18	3	0.0665029	3.64336	3.66572	3.68728	3.66354	3.70892	3.69781	3.59058	3.5909	3.54931	3.70433	3.73694	3.75904
Lst8	0.222082	0.0418182	18	3	0.0664657	3.5298	3.50558	3.50229	3.57228	3.50963	3.64947	3.48321	3.41563	3.40524	3.67116	3.70369	3.69204
Tie	0.222082	0.0418182	18	6	0.0664542	3.67229	3.69969	3.76589	3.76627	3.84475	3.74025	3.56702	3.71257	3.55709	3.75016	3.72183	3.7838
CG32772	0.222082	0.0418182	18	6	0.0662276	3.9701	4.00381	4.07427	4.05614	4.10798	4.1013	3.97851	3.9962	3.96458	4.05311	3.97866	4.05532
shark	0.222082	0.0418182	18	6	0.0659296	3.20576	3.25739	3.31459	3.35063	3.31714	3.25704	3.15971	3.16791	3.18876	3.22955	3.28386	3.33334
atms	0.222082	0.0418182	18	6	0.0658945	4.49348	4.59224	4.55953	4.62649	4.61764	4.58231	4.51561	4.49793	4.48027	4.61241	4.58008	4.68791
CG16941	0.222082	0.0418182	18	6	0.0656723	3.63495	3.59983	3.6843	3.6927	3.73193	3.68143	3.54001	3.6131	3.55847	3.68465	3.70817	3.77143
CG30060	0.222082	0.0418182	18	0	0.0656054	1.30896	1.28978	1.26456	1.17178	1.19333	1.16926	1.1699	1.21914	1.20991	1.20825	1.19663	1.20459
Syx13	0.222082	0.0418182	24	15	0.065591	4.71473	4.74005	4.74549	4.71384	4.76424	4.80039	4.85914	4.77698	4.84121	4.81358	4.83553	4.84404
Mst85C	0.222082	0.0418182	18	6	0.0650313	4.00244	4.02455	4.05176	4.0806	4.10238	4.12877	4.01041	3.94123	3.97508	4.27436	4.09507	4.2411
mnd	0.222082	0.0418182	24	12	0.0648123	3.21574	3.24756	3.31875	3.32018	3.30503	3.30501	3.41423	3.39663	3.4912	3.33162	3.26104	3.22081
CR43855	0.222082	0.0418182	24	6	0.0638118	1.42716	1.56448	1.42444	1.52713	1.62092	1.42881	1.4303	1.49555	1.39326	1.36793	1.39135	1.36668
CG43444	0.222082	0.0418182	24	9	0.0637958	2.65713	2.58028	2.56697	2.66489	2.61431	2.66977	2.71612	2.57568	2.61818	2.45048	2.51543	2.53667
CG7609	0.222082	0.0418182	18	6	0.0634631	3.03832	2.99728	3.06204	3.12383	3.08703	3.04505	2.94067	2.88036	2.98999	3.11041	3.05705	3.14083
rig	0.222082	0.0418182	18	3	0.0632148	2.83254	2.80674	2.77291	2.84329	2.76977	2.74928	2.66935	2.72709	2.69112	2.81103	2.80532	2.86256
CG12082	0.222082	0.0418182	18	6	0.0631651	3.89212	3.92028	3.8645	3.99051	3.95382	3.99979	3.85068	3.84188	3.89291	3.94597	4.05661	4.14286
Pka-R2	0.222082	0.0418182	18	12	0.0623008	4.6708	4.56333	4.5428	4.66009	4.5773	4.57331	4.70019	4.63203	4.69306	4.5726	4.55318	4.54221
CG4658	0.222082	0.0418182	24	18	0.0621451	5.82891	5.81222	5.76494	5.81197	5.7473	5.70023	5.88662	5.9132	5.7879	5.85474	5.91697	5.83935
CG1233	0.222082	0.0418182	18	6	0.0621099	3.7182	3.71527	3.74612	3.80386	3.76295	3.75542	3.65716	3.59725	3.63496	3.78354	3.81267	3.88262
CG3287	0.222082	0.0418182	24	15	0.0620532	4.51939	4.5559	4.53429	4.51316	4.61618	4.52209	4.64903	4.64394	4.63742	4.63879	4.59149	4.56173
CG18005	0.222082	0.0418182	18	6	0.0620041	3.52912	3.68543	3.66365	3.73707	3.71164	3.68654	3.65112	3.56814	3.58309	3.69972	3.6706	3.63614
AIF	0.222082	0.0418182	18	3	0.0618598	4.03926	4.00687	4.08568	4.0827	4.14348	4.02387	3.97681	4.00123	3.91939	4.09164	4.11971	4.14511
CG8833	0.222082	0.0418182	24	3	0.0618056	2.70669	2.71755	2.69869	2.72182	2.72182	2.65171	2.54968	2.63221	2.51497	2.63746	2.62088	2.68359
tai	0.222082	0.0418182	24	6	0.0617926	3.41115	3.39037	3.30251	3.37108	3.32461	3.40783	3.34865	3.30518	3.30161	3.11648	3.23333	3.29035
CG34132	0.222082	0.0418182	18	3	0.0616527	4.64778	4.60045	4.6967	4.51971	4.61646	4.51271	4.40954	4.51326	4.57751	4.71537	4.70183	4.58825
CG9305	0.222082	0.0418182	18	6	0.0615958	3.51476	3.45443	3.55904	3.52139	3.58929	3.5633	3.45083	3.39948	3.4152	3.56857	3.49457	3.64653
Bet1	0.222082	0.0418182	18	6	0.0614583	5.43313	5.43959	5.41849	5.42857	5.44767	5.52005	5.36881	5.26867	5.28611	5.47322	5.4845	5.47147
bun	0.222082	0.0418182	18	12	0.0610763	5.32554	5.2326	5.13772	5.20223	5.22245	5.25137	5.31897	5.32906	5.29572	5.06489	5.19034	5.0673
CG10702	0.222082	0.0418182	24	6	0.0609957	2.90359	2.88091	2.86231	2.82269	2.93759	2.92125	2.82871	2.8537	2.81735	2.74602	2.83497	2.68604
gish	0.222082	0.0418182	18	12	0.0606377	4.64053	4.50268	4.47963	4.61832	4.50199	4.55752	4.61448	4.63228	4.64835	4.47463	4.48241	4.4404
CG42700	0.222082	0.0418182	24	18	0.0604607	3.42554	3.55552	3.56716	3.55685	3.45194	3.51385	3.68518	3.57226	3.58742	3.57466	3.63604	3.60434
CG17184	0.222082	0.0418182	18	6	0.0604412	3.94685	3.96248	4.02154	4.03233	4.02873	4.06468	3.90907	3.96023	3.92722	4.06691	4.00194	4.10661
Mrtf	0.222082	0.0418182	24	6	0.0602116	3.2772	3.24288	3.18961	3.25352	3.31804	3.34136	3.19711	3.20357	3.17934	3.10483	3.15736	3.25056
CG3800	0.222082	0.0418182	24	6	0.0601389	7.03393	7.00021	7.12123	7.04836	7.09852	7.10907	7.03676	7.02603	6.99222	6.93866	6.88891	7.00492
CG5446	0.222082	0.0418182	18	6	0.0599947	5.55384	5.65155	5.63493	5.56475	5.68259	5.70162	5.561	5.36748	5.55212	5.64138	5.63881	5.66733
tmod	0.222082	0.0418182	24	3	0.0599305	6.63603	6.68937	6.68593	6.67879	6.63904	6.66525	6.59384	6.58056	6.56582	6.58233	6.65808	6.57805
U3-55K	0.222082	0.0418182	24	0	0.059737	2.35836	2.41249	2.43369	2.39389	2.32493	2.37931	2.24379	2.24585	2.11101	2.38183	2.3385	2.38278
Nsf2	0.222082	0.0418182	18	3	0.059628	4.49067	4.45079	4.36957	4.36646	4.40378	4.39721	4.33994	4.31075	4.31727	4.37643	4.45261	4.48372
CG1965	0.222082	0.0418182	18	6	0.0596058	4.18731	4.16392	4.29263	4.24066	4.31221	4.22268	4.04079	4.09629	4.15637	4.20495	4.12203	4.20828
CG11586	0.222082	0.0418182	18	6	0.0596022	3.96248	3.99112	3.98537	4.06966	4.11717	4.03754	3.90475	3.98952	3.96034	4.10852	3.99039	3.9643
Patj	0.222082	0.0418182	18	6	0.0594549	3.56066	3.55967	3.59707	3.60502	3.64022	3.64359	3.47658	3.45806	3.52451	3.48584	3.63885	3.68943
CG13894	0.222082	0.0418182	24	12	0.0591793	1.71161	1.73642	1.70871	1.82592	1.87375	1.80985	1.79021	1.84086	1.92454	1.76852	1.85041	1.78137
NHP2	0.222082	0.0418182	24	21	0.0590885	4.28632	4.31474	4.29099	4.20481	4.24615	4.25449	4.20537	4.29355	4.23935	4.41777	4.29136	4.40901
Topors	0.222082	0.0418182	24	3	0.0589348	2.71794	2.7683	2.80353	2.79833	2.77554	2.7883	2.61821	2.70462	2.61617	2.72125	2.70529	2.75796
CG15544	0.222082	0.0418182	24	15	0.0588031	1.7269	1.72542	1.77336	1.86281	1.83906	1.81337	1.84524	1.8996	1.86406	1.88955	1.91079	1.8304
Eip71CD	0.222082	0.0418182	18	3	0.0585458	5.99594	6.12553	6.01297	5.95967	6.05573	6.17609	6.04706	5.93017	5.89749	6.21148	6.22821	6.48844
CG3529	0.222082	0.0418182	24	12	0.0584247	4.70958	4.83027	4.77666	4.80291	4.87724	4.84165	4.89226	4.94321	4.96007	4.77416	4.82749	4.87751
Slh	0.222082	0.0418182	18	6	0.0583799	4.5558	4.54584	4.50138	4.58394	4.56886	4.55313	4.42002	4.45344	4.44097	4.49201	4.56559	4.62328
CG17036	0.222082	0.0418182	18	6	0.0583109	2.74523	2.71652	2.7854	2.8292	2.79898	2.83957	2.72761	2.54655	2.78952	2.78187	2.7893	2.81672
CG33298	0.222082	0.0418182	18	12	0.0582095	3.81199	3.82611	3.89354	3.83018	3.88998	3.86025	3.97369	3.95394	3.90843	3.79011	3.82164	3.8716
MED14	0.222082	0.0418182	18	6	0.0579994	3.99403	4.01464	3.96537	3.99559	4.03142	4.0474	3.86117	3.86314	3.8625	3.89783	4.02887	4.12389
CG32409	0.222082	0.0418182	18	3	0.0579053	3.44263	3.53922	3.49457	3.48042	3.57351	3.51832	3.37205	3.43643	3.42057	3.60999	3.5364	3.62084
CG12213	0.222082	0.0418182	18	6	0.0578992	4.37094	4.37836	4.42919	4.45148	4.47768	4.48754	4.37319	4.44689	4.3696	4.54699	4.44712	4.44649
Vps20	0.222082	0.0418182	18	3	0.057666	5.75825	5.81453	5.84908	5.813	5.84392	5.78845	5.65373	5.61205	5.79425	5.92519	5.8298	5.94829
cdc14	0.222082	0.0418182	24	15	0.0576158	4.47269	4.45884	4.51551	4.43344	4.53863	4.48709	4.63619	4.60505	4.59645	4.52701	4.48188	4.54086
CG1319	0.222082	0.0418182	24	15	0.0571791	5.91598	5.94122	6.02013	5.99904	6.01861	5.95637	6.06677	6.05517	6.03522	6.176	6.05429	6.03813
CG10914	0.222082	0.0418182	24	3	0.0569448	2.80997	2.84564	2.85569	2.81397	2.83185	2.79276	2.63965	2.60633	2.70816	2.76473	2.82076	2.81438
SRPK	0.222082	0.0418182	24	6	0.0565151	4.85127	4.88946	4.89251	4.94674	4.95555	4.91811	4.84728	4.78679	4.81023	4.81254	4.84118	4.85993
lilli	0.222082	0.0418182	24	6	0.0565032	3.36904	3.36639	3.34247	3.31395	3.34693	3.34657	3.33417	3.27966	3.29224	3.11839	3.21193	3.2667
CG3362	0.222082	0.0418182	18	3	0.0562339	4.76385	4.79163	4.84822	4.84082	4.85986	4.84379	4.74389	4.75424	4.77089	5.04418	4.93848	4.96774
CG6700	0.222082	0.0418182	24	6	0.0561206	4.89229	4.83486	4.89523	4.8325	4.86229	4.94421	4.81453	4.8086	4.87498	4.71728	4.76882	4.78907
CG18787	0.222082	0.0418182	18	3	0.0559093	1.74209	1.71355	1.69566	1.62607	1.68821	1.69583	1.55112	1.66302	1.58577	1.75572	1.64813	1.74303
ine	0.222082	0.0418182	24	12	0.0557739	4.91477	4.87272	4.93704	4.99163	4.92325	4.94156	5.10211	4.97531	5.10896	4.85988	4.93916	4.92831
cnn	0.222082	0.0418182	24	9	0.0556569	4.20705	4.27145	4.28463	4.34998	4.35283	4.31862	4.32325	4.37003	4.27287	4.25638	4.2564	4.24436
sll	0.222082	0.0418182	24	0	0.055583	4.23454	4.19959	4.22136	4.10901	4.17551	4.23056	4.09068	4.02766	4.12168	4.14952	4.2047	4.19291
Sras	0.222082	0.0418182	18	3	0.0555278	2.51099	2.52712	2.48446	2.51552	2.48213	2.54405	2.40442	2.44859	2.38574	2.54259	2.52169	2.56245
CG31612	0.222082	0.0418182	24	0	0.0552903	1.58965	1.60323	1.55744	1.49448	1.45861	1.45365	1.47054	1.41086	1.41583	1.47046	1.5157	1.43952
Mob4	0.222082	0.0418182	18	3	0.0552534	5.46328	5.52993	5.54873	5.52305	5.57592	5.61439	5.45672	5.42689	5.47898	5.68905	5.638	5.65172
CG1598	0.222082	0.0418182	18	3	0.0551861	5.13562	5.24388	5.28012	5.1886	5.29937	5.2723	5.13436	5.11056	5.20864	5.5026	5.50628	5.58098
CG8801	0.222082	0.0418182	24	18	0.0551787	8.12232	8.18166	8.11198	8.13035	8.19474	8.1109	8.20394	8.15799	8.18297	8.2114	8.31535	8.27966
CG6724	0.222082	0.0418182	24	0	0.0551448	3.37887	3.52551	3.4223	3.41071	3.35445	3.38455	3.30892	3.34515	3.26042	3.38775	3.40209	3.46472
CG6345	0.222082	0.0418182	24	21	0.0550262	3.1636	3.16459	3.19591	3.19403	3.11668	3.06886	3.18655	3.14414	3.07294	3.27207	3.21855	3.22024
CG10933	0.222082	0.0418182	18	3	0.0549869	2.31204	2.36319	2.38371	2.29936	2.36075	2.34438	2.22759	2.20337	2.32592	2.55441	2.35007	2.36413
CG31230	0.222082	0.0418182	24	21	0.0545748	1.13795	1.21565	1.14061	1.18367	1.05934	1.08426	1.13835	1.20285	1.13358	1.21065	1.23684	1.28276
LanB2	0.222082	0.0418182	24	18	0.0545592	3.5904	3.60412	3.58432	3.62774	3.55011	3.63414	3.69932	3.64216	3.63453	3.66241	3.68728	3.7941
CG6834	0.222082	0.0418182	24	12	0.054504	4.2808	4.22867	4.3474	4.38671	4.4474	4.37424	4.41522	4.43123	4.47204	4.52552	4.34962	4.35734
Su(var)205	0.222082	0.0418182	18	6	0.0541183	5.75432	5.79937	5.76764	5.83085	5.8374	5.89998	5.72789	5.83043	5.73993	5.84851	5.79576	5.82742
CG4199	0.222082	0.0418182	18	15	0.0538763	5.15233	5.12968	5.14991	5.11496	5.1035	5.13067	5.26963	5.23883	5.23984	5.13541	5.22415	5.23432
CG7289	0.222082	0.0418182	18	3	0.0538505	4.64309	4.67888	4.65562	4.63595	4.77407	4.66239	4.584	4.56693	4.59828	4.7429	4.69448	4.72924
CG13982	0.222082	0.0418182	18	15	0.0536105	1.70682	1.67421	1.631	1.58885	1.60755	1.63553	1.68654	1.78927	1.7022	1.61266	1.58122	1.61016
CG13567	0.222082	0.0418182	18	3	0.0535654	4.12556	4.11702	4.17952	4.10614	4.15128	4.14117	3.89378	4.05271	4.0695	4.31095	4.17064	4.12593
CG13392	0.222082	0.0418182	18	3	0.0534612	3.30413	3.23818	3.32056	3.22199	3.23391	3.22425	3.15128	3.2597	3.122	3.39482	3.26794	3.29694
IntS6	0.222082	0.0418182	24	3	0.053219	2.83373	2.77369	2.80432	2.79874	2.8314	2.80548	2.7326	2.68456	2.72926	2.70811	2.74772	2.79438
CG2063	0.222082	0.0418182	18	3	0.0531041	4.25404	4.34407	4.28608	4.26927	4.22788	4.27848	4.14084	4.19417	4.21323	4.36229	4.35096	4.21974
CG9135	0.222082	0.0418182	24	15	0.0528174	2.96812	2.90472	2.94525	2.99039	2.97092	3.01072	2.9773	3.08127	3.04599	3.00298	3.04243	3.10048
CG8414	0.222082	0.0418182	18	3	0.0528155	2.91926	2.84098	2.8038	2.8708	2.80123	2.78453	2.71408	2.76629	2.79579	2.81063	2.91896	2.89686
SAK	0.222082	0.0418182	18	3	0.052763	2.08728	2.1622	2.02118	2.06094	2.10809	2.09132	1.99181	2.02925	2.01266	2.11254	2.18141	2.13263
eIF-2beta	0.222082	0.0418182	18	6	0.05238	6.8657	6.90815	6.88526	6.92782	6.91721	6.93977	6.81379	6.80684	6.82176	6.83901	6.82323	6.93098
CG5292	0.222082	0.0418182	18	3	0.0523414	3.99538	4.05554	4.00032	3.94021	4.03995	3.99569	3.8938	3.94955	3.9263	4.09245	4.00006	4.04
dgt6	0.222082	0.0418182	24	0	0.0521573	2.28755	2.43454	2.35388	2.33432	2.30368	2.31473	2.2132	2.26532	2.1785	2.33983	2.35121	2.30928
pr	0.222082	0.0418182	24	3	0.0519569	5.86632	5.78476	5.83876	5.79593	5.81246	5.76842	5.72164	5.69329	5.636	5.91539	5.76834	5.74224
Patr-1	0.222082	0.0418182	18	3	0.0519006	3.34276	3.34654	3.23003	3.22951	3.31033	3.28938	3.19876	3.24054	3.21598	3.31258	3.32163	3.36453
CG3542	0.222082	0.0418182	24	3	0.0517766	3.3523	3.31152	3.2871	3.30686	3.3506	3.34632	3.25377	3.25543	3.23439	3.25584	3.2436	3.30247
cert	0.222082	0.0418182	24	12	0.0516215	4.78711	4.71615	4.68811	4.81963	4.8149	4.79019	4.87002	4.85339	4.83568	4.73007	4.76939	4.89073
nxf2	0.222082	0.0418182	24	0	0.0515829	1.58577	1.65986	1.67897	1.57269	1.56178	1.63928	1.52241	1.5139	1.53157	1.56956	1.58682	1.67998
Notum	0.222082	0.0418182	18	3	0.051351	1.5227	1.56321	1.58111	1.50542	1.51675	1.6011	1.45523	1.47426	1.48341	1.58661	1.58067	1.57311
mfrn	0.222082	0.0418182	18	12	0.0511429	5.53127	5.53295	5.51115	5.57447	5.55096	5.56041	5.71691	5.6992	5.58885	5.50175	5.60719	5.5238
CG3760	0.222082	0.0418182	18	3	0.051083	5.22331	5.27136	5.25247	5.2715	5.20644	5.23337	5.14212	5.19925	5.11659	5.3049	5.26434	5.26424
Mlf	0.222082	0.0418182	18	6	0.0509668	5.62176	5.65609	5.70178	5.68185	5.76486	5.73542	5.64342	5.61553	5.64359	5.78004	5.68102	5.73032
CG10903	0.222082	0.0418182	18	6	0.0509258	3.72601	3.69167	3.71638	3.7336	3.7738	3.75297	3.64757	3.64485	3.65828	3.88529	3.7667	3.8142
CG7928	0.222082	0.0418182	18	3	0.0509182	3.05285	3.08177	3.05314	3.12437	3.13686	3.05236	3.01271	3.02093	2.94648	3.22348	3.09644	3.16966
CG4709	0.222082	0.0418182	24	3	0.0508835	3.22642	3.21278	3.16644	3.14054	3.22472	3.18915	3.05944	3.02772	3.08908	3.18991	3.15558	3.16251
ABCB7	0.222082	0.0418182	18	3	0.0508802	5.32001	5.29632	5.35259	5.28065	5.28708	5.32811	5.19477	5.24805	5.22836	5.28975	5.32002	5.42861
Sema-1b	0.222082	0.0418182	24	12	0.0508722	5.0581	5.0449	5.05768	5.13019	5.18449	5.09634	5.18491	5.25927	5.07471	5.18172	5.11311	5.0646
CG6613	0.222082	0.0418182	24	21	0.050207	4.162	4.17067	4.19655	4.11584	4.21067	4.1015	4.13325	4.12965	4.10732	4.20608	4.21916	4.22081
CG8064	0.222082	0.0418182	18	3	0.0501107	3.03071	3.06876	3.00761	3.03942	3.03041	3.05721	2.94848	2.96855	2.96392	3.03809	3.07604	3.1641
app	0.222082	0.0418182	24	6	0.0499457	3.68718	3.59819	3.63018	3.6282	3.65091	3.6396	3.61961	3.55666	3.58697	3.45598	3.50129	3.60111
CG15653	0.222082	0.0418182	18	3	0.0498222	3.43667	3.51809	3.51186	3.43084	3.38348	3.47202	3.36621	3.43231	3.39113	3.55277	3.50638	3.47722
l(3)01239	0.222082	0.0418182	24	21	0.0498221	5.80631	5.92901	5.8734	5.85013	5.82734	5.8468	5.84182	5.86396	5.85447	5.99712	5.93696	5.94372
l(3)72Dh	0.222082	0.0418182	24	0	0.0497614	5.56968	5.64434	5.66273	5.52035	5.53301	5.61315	5.43993	5.52946	5.53543	5.60478	5.56924	5.53881
uri	0.222082	0.0418182	18	6	0.0496914	3.09051	3.03462	3.04023	3.1105	3.13968	3.00276	2.96684	2.95523	2.95469	3.06192	3.05735	3.09807
128up	0.222082	0.0418182	18	3	0.0496827	4.67732	4.74758	4.73753	4.76423	4.69328	4.66087	4.64995	4.67531	4.59229	4.78793	4.73274	4.80937
CG16953	0.222082	0.0418182	24	18	0.0496715	6.5388	6.60823	6.50757	6.57624	6.57226	6.56574	6.63839	6.6257	6.59551	6.64091	6.67687	6.6376
CG42360	0.222082	0.0418182	24	0	0.0496225	3.86738	3.76868	3.78639	3.69948	3.76923	3.75797	3.53851	3.72316	3.57911	3.77063	3.73523	3.71285
spn-F	0.222082	0.0418182	18	3	0.0492965	4.05767	3.9972	4.12338	4.05825	4.02682	4.06692	4.02775	3.92799	3.95152	4.20941	4.08526	4.30493
Xe7	0.222082	0.0418182	24	6	0.0491628	5.60678	5.67879	5.69412	5.71527	5.67976	5.69446	5.59043	5.59632	5.65578	5.62137	5.5804	5.65066
knrl	0.222082	0.0418182	18	6	0.0490009	2.59962	2.58763	2.65857	2.67747	2.69052	2.636	2.56671	2.58604	2.60706	2.69174	2.62289	2.62181
prod	0.222082	0.0418182	18	3	0.0489699	4.12358	4.17831	4.14846	4.19895	4.16445	4.16816	3.98761	4.11204	4.07921	4.27397	4.19406	4.25289
TfIIA-L	0.222082	0.0418182	18	6	0.0488198	5.56118	5.69216	5.68098	5.7487	5.74644	5.72668	5.68253	5.60504	5.70882	5.71631	5.74416	5.73831
CG3803	0.222082	0.0418182	18	3	0.0475676	3.84149	3.9784	3.909	3.88765	3.843	3.86866	3.81166	3.82273	3.78545	3.95699	3.90958	3.86973
Rnp4F	0.222082	0.0418182	18	6	0.0471624	3.83139	3.91959	3.88705	3.89809	3.92821	3.92922	3.80627	3.86006	3.84372	3.88819	3.92236	3.98781
Taf12L	0.222082	0.0418182	18	12	0.0470744	1.08426	1.04574	1.01468	1.16617	1.07086	1.03427	1.10084	1.38451	1.11292	1.03661	1.02778	1.01243
Cbp80	0.222082	0.0418182	18	6	0.0468512	3.99104	3.99923	3.99759	4.02634	4.06385	4.01591	3.91312	3.97227	3.91955	3.98807	4.03485	4.11788
CG13631	0.222082	0.0418182	18	0	0.0467086	6.41879	6.32445	6.28217	6.12787	6.25839	6.21639	6.31664	6.26256	6.28519	6.39197	6.27465	6.34668
CG8642	0.222082	0.0418182	24	21	0.0466806	1.45089	1.47304	1.40808	1.38033	1.4575	1.39765	1.38058	1.45084	1.42744	1.49649	1.50705	1.539
CG10602	0.222082	0.0418182	18	6	0.0466642	5.36695	5.32295	5.37675	5.42655	5.43338	5.4135	5.33898	5.3625	5.34751	5.43527	5.4265	5.42604
Dfd	0.222082	0.0418182	24	15	0.0465438	1.03257	1.03103	1.05136	1.02455	1.03182	1.01745	1.35723	1.16012	1.45822	1.06424	1.05742	1.0739
Rat1	0.222082	0.0418182	24	3	0.04653	3.08406	3.00243	3.04364	3.05313	3.01077	3.02964	2.96437	2.9633	2.87847	2.97288	3.00145	3.0477
CG2889	0.222082	0.0418182	18	3	0.0462635	3.76454	3.88501	3.78591	3.68147	3.7469	3.82655	3.6895	3.73526	3.7001	3.81163	3.91397	3.87767
[truncated: 9,318 more rows]

## Sheet: JTK analysis of Mhc>timOE
Probeset - Mhc>timOE	BHQ	ADJP	PER	LAG	AMP	sample_1618522_mhctim2_zt0_rep2_	sample_1618523_mhctim2_zt0_rep3_	sample_1618524_mhctim2_zt6_rep1_	sample_1618525_mhctim2_zt6_rep2_	sample_1618526_mhctim2_zt6_rep3_	sample_1618527_mhctim2_zt12_rep1	sample_1618528_mhctim2_zt12_rep2	sample_1618529_mhctim2_zt12_rep3	sample_1618530_mhctim2_zt18_rep1	sample_1618531_mhctim2_zt18_rep2	sample_1618532_mhctim2_zt18_rep3
CG2854	0.192817	0.0466667	18	3	0.00131697	1.07403	1.0109	1.00892	1.00773	1.00785	1.01266	1.00546	1.00652	1.01573	1.0962	1.0197
CG31055	0.149386	0.0243939	18	3	0.00212623	1.06612	1.00433	1	1.00204	1.00415	1	1	1.00258	1.005	1.12393	1.00783
CG3517	0.192817	0.0466667	18	3	0.00220045	1.42192	1.00311	1.00339	1	1	1	1	1	1.0179	1.59486	1.04081
S-Lap3	0.192817	0.0466667	24	0	0.00277741	1.54283	1.00298	1	1	1.00143	1	1	1	1.00172	1.68177	1.00898
CG4375	0.192817	0.0466667	18	3	0.00400233	1.598	1.00566	1.00617	1.00534	1.01083	1	1.00565	1	1.00654	1.71624	1.01363
CG6497	0.0515997	0.0019697	18	3	0.00424508	1.14864	1.00861	1.00627	1.00543	1.00551	1	1.00287	1	1.01984	1.17912	1.02072
CG7362	0.149386	0.0243939	24	21	0.00509555	1.10757	1.00844	1.00185	1.00319	1.00324	1.00393	1.00338	1.00605	1.00391	1.14629	1.0183
CG12362	0.149386	0.0243939	18	3	0.00522336	1.23263	1.00687	1.005	1.0151	1.00659	1.00533	1.00229	1	1.00795	1.36445	1.0302
CG12857	0.192817	0.0466667	18	3	0.00545227	1.06734	1.06112	1.05466	1.03703	1.05604	1.04863	1.0692	1.02352	1.07044	1.10652	1.09935
CG9316	0.108914	0.0118182	18	3	0.00581182	1.10622	1.01443	1.00901	1.00391	1.01384	1.0024	1.00207	1.00986	1.01903	1.10628	1.01741
CG10996	0.149386	0.0243939	18	3	0.0060284	1.05309	1.01431	1.02334	1.02357	1.01373	1.00833	1.01074	1.0213	1.02473	1.0905	1.05957
trp	0.149386	0.0243939	18	3	0.0060785	1.08871	1.06876	1.07819	1.07085	1.07785	1.07002	1.06042	1.06943	1.11435	1.11229	6.82282
CG3213	0.108914	0.0118182	24	21	0.00608752	1.77193	1.00377	1	1.00178	1	1	1.00189	1.00225	1.00654	2.00249	1.08423
prom	0.149386	0.0243939	24	15	0.00626039	1.01064	1.01226	1.01669	1.01733	1.01273	1.02599	1.01935	1.0279	1.01769	1.0159	2.40156
CG13872	0.192817	0.0466667	18	3	0.00752782	1.12577	1.02211	1.03124	1.02295	1.0212	1.02056	1.01329	1.0106	1.02553	1.1352	1.02402
Cct2	0.192817	0.0466667	18	12	0.00886899	5.00531	5.00851	5.02991	5.0112	5.00752	5.06394	5.08904	4.90912	4.70447	4.73109	4.8625
CG43750	0.192817	0.0466667	18	3	0.00891048	1.21938	1.0939	1.07446	1.0792	1.0804	1.07919	1.06322	1.0813	1.11954	1.22027	1.11869
Mst98Ca	0.192817	0.0466667	24	21	0.00955269	1.84415	1.0034	1	1	1.00326	1.0079	1.0034	1	1.00786	2.29696	1.06441
CG42523	0.192817	0.0466667	24	21	0.00969171	1.23141	1.00471	1	1	1	1	1	1.00562	1.01627	1.33226	1.01135
Optix	0.192817	0.0466667	18	3	0.00973559	1.12958	1.11565	1.12086	1.10519	1.13509	1.10084	1.11258	1.10884	1.13459	1.22179	1.64703
CG1988	0.108914	0.0118182	24	21	0.0101021	1.31754	1.00816	1	1.00386	1.00196	1.00238	1.00204	1.00488	1.01178	1.40722	1.04384
CG18063	0.108914	0.0118182	18	0	0.010141	1.04391	1.06843	1.03771	1.0327	1.02002	1.02422	1.04141	1.04122	1.04388	1.07534	1.04172
CG3714	0.149386	0.0243939	18	12	0.0105222	6.04766	6.06949	6.06288	6.09193	6.06565	6.06788	6.12958	6.07984	5.75958	5.75586	5.81684
CG1561	0.108914	0.0118182	18	3	0.0113801	1.0427	1.05111	1.02252	1.0483	1.03742	1.0216	1.02269	1.03194	1.10664	1.05045	5.41215
CG31690	0.192817	0.0466667	24	0	0.0125756	2.33515	2.34106	2.32269	2.32548	2.35003	2.30692	2.22915	2.27477	2.32556	2.33027	2.32526
Pde9	0.192817	0.0466667	18	3	0.0131594	2.06155	2.11709	2.06149	2.01245	2.09514	2.05861	1.97097	2.08751	2.11541	2.12408	2.18842
d-cup	0.192817	0.0466667	18	6	0.014127	1.02441	1.03781	1.04119	1.05132	1.04816	1.01476	1.02111	1.03513	1.04839	1.03818	1.05548
bib	0.192817	0.0466667	18	3	0.0143429	1.64692	1.63913	1.57835	1.60738	1.6598	1.60283	1.62367	1.59912	1.72716	1.67426	1.68223
cact	0.192817	0.0466667	18	12	0.0149957	6.06354	6.02347	6.01716	6.03966	6.03413	6.05578	6.07741	6.04039	5.95937	5.89512	5.97286
CG30085	0.192817	0.0466667	18	3	0.0150049	1.61163	1.64206	1.56137	1.58723	1.60895	1.57625	1.55999	1.61376	1.64492	1.6643	1.63582
CG10435	0.0763085	0.00515152	18	3	0.0150388	4.07909	4.05104	4.0268	4.05016	4.05857	4.04503	4.0331	3.97315	4.11384	4.14416	4.13502
U2A	0.192817	0.0466667	18	3	0.0150652	3.01199	3.01338	2.96512	3.0723	2.97571	2.99167	3	2.94422	3.09355	3.09713	3.11344
mRpL50	0.149386	0.0243939	18	3	0.015208	5.39649	5.37088	5.38303	5.30355	5.37576	5.32232	5.36052	5.36254	5.412	5.42987	5.40532
mRpS26	0.108914	0.0118182	18	3	0.0152152	5.17375	5.20458	5.1827	5.16128	5.16831	5.15207	5.13993	5.17633	5.22983	5.25493	5.2156
CG5327	0.192817	0.0466667	18	3	0.0158502	1.08962	1.05773	1.08031	1.08857	1.08422	1.06918	1.06171	1.04693	1.08958	1.1723	1.09108
CG30377	0.192817	0.0466667	18	12	0.0159197	1.48728	1.53528	1.56839	1.50024	1.48871	1.52078	1.54681	1.53929	1.46483	1.45719	1.41757
CG17207	0.192817	0.0466667	18	3	0.0170378	1.27742	1.25137	1.26291	1.24651	1.3142	1.22222	1.22822	1.27207	1.37118	1.41755	1.34122
SIP2	0.192817	0.0466667	24	21	0.0174129	1.53777	1.04324	1.04091	1.03548	1.02366	1.03527	1.04604	1.04809	1.05151	1.70216	1.06396
CG1518	0.149386	0.0243939	18	3	0.0176423	4.06964	4.05277	3.99485	4.03498	3.9786	4.02202	3.99139	3.98942	4.07845	4.12403	4.06724
Aats-trp	0.192817	0.0466667	18	3	0.0177094	3.74375	3.69259	3.70979	3.68754	3.695	3.67714	3.68628	3.66096	3.69359	3.71616	3.80769
Dad	0.149386	0.0243939	18	12	0.0179606	4.21751	4.25323	4.28781	4.22896	4.31496	4.2879	4.25545	4.30387	4.16055	4.09875	4.17448
CG12106	0.108914	0.0118182	18	3	0.0180479	2.49734	2.49175	2.50101	2.47589	2.46435	2.4507	2.48391	2.4385	2.62394	2.54298	2.6304
CG9975	0.192817	0.0466667	18	0	0.0183028	1.28285	1.06368	1.01652	1.01431	1.01716	1.03026	1.0247	1.03108	1.02697	1.58136	1.02817
CG14974	0.0515997	0.0019697	18	3	0.0187049	1.26969	1.02721	1.00995	1.0257	1.00875	1	1	1	1.04173	1.3748	1.05426
CG4065	0.192817	0.0466667	18	3	0.0192141	3.56459	3.59402	3.55156	3.55322	3.53741	3.53173	3.453	3.54783	3.634	3.61296	3.54436
CG17322	0.192817	0.0466667	18	12	0.0204525	4.09684	4.12624	4.10255	4.06864	4.11166	4.15253	4.10467	4.14539	3.86639	3.82437	3.93877
CG33144	0.108914	0.0118182	18	3	0.0204993	4.63392	4.65	4.63665	4.64427	4.66248	4.61335	4.50685	4.6278	4.76393	4.72638	4.68491
Cyp4p1	0.192817	0.0466667	18	12	0.0207836	5.99215	5.98743	6.02262	6.07972	6.05551	6.08294	6.16483	5.96477	5.70591	5.67263	5.97358
Rph	0.0515997	0.0019697	18	3	0.0209647	1.83961	1.84315	1.7879	1.81783	1.83243	1.76529	1.80387	1.81005	1.86802	1.84907	2.01255
CG5805	0.192817	0.0466667	18	12	0.0213395	4.62488	4.5889	4.59063	4.58328	4.63082	4.69566	4.62718	4.6108	4.50855	4.47846	4.5125
Bap60	0.0515997	0.0019697	18	0	0.0216531	4.42692	4.43042	4.37949	4.36611	4.35901	4.40992	4.42133	4.39783	4.42306	4.41489	4.41153
Sox21b	0.192817	0.0466667	18	12	0.0217249	2.05951	2.09564	2.00614	2.08832	2.08522	2.11445	2.11051	2.09877	1.95912	2.05692	2.04586
CG13244	0.192817	0.0466667	24	3	0.0218195	1.15327	1.05769	1.04736	1.03431	1.03485	1.01699	1	1.00875	1.01691	1.2454	1.02642
CG9715	0.149386	0.0243939	18	3	0.0219061	3.23941	3.29505	3.28759	3.22891	3.27185	3.28138	3.17998	3.21831	3.36271	3.31661	3.31555
CG3033	0.149386	0.0243939	18	0	0.0224547	3.90166	3.91856	3.81998	3.89299	3.85438	3.8708	3.86358	3.86967	3.92917	3.90087	3.89447
CG9377	0.192817	0.0466667	18	12	0.0224641	8.0462	7.98607	8.00431	8.09914	8.12281	8.07665	8.23942	8.02471	6.85295	6.83911	6.87723
CG6652	0.0763085	0.00515152	24	21	0.0225325	1.13274	1.13747	1.10327	1.11447	1.07303	1.1205	1.10794	1.11485	1.12207	1.23254	1.25852
CG12333	0.108914	0.0118182	24	0	0.0226263	4.37866	4.43053	4.36733	4.29514	4.28665	4.28215	4.21933	4.28144	4.28774	4.31162	4.31074
CG10660	0.192817	0.0466667	18	12	0.0226805	3.74611	3.78015	3.71378	3.81308	3.74744	3.78222	3.83865	3.77548	3.55889	3.70403	3.62959
CG7311	0.149386	0.0243939	24	0	0.0226956	1.3475	1.04397	1.0231	1.01821	1.01665	1.0157	1.01159	1.01154	1.01784	1.49448	1.04842
dgt1	0.192817	0.0466667	18	3	0.0227856	3.93345	3.91872	3.91132	3.97566	3.95307	3.90991	3.90169	3.90146	3.99618	3.96824	3.96301
Cdc27	0.108914	0.0118182	24	0	0.0230821	3.89887	3.88777	3.86255	3.88538	3.8771	3.84691	3.7077	3.84174	3.89686	3.87964	3.87037
kat-60L1	0.192817	0.0466667	18	3	0.023125	2.50038	2.52857	2.51966	2.51058	2.46032	2.43978	2.47562	2.51129	2.5304	2.60059	2.54315
sima	0.192817	0.0466667	18	12	0.0231819	5.17413	5.17231	5.16529	5.17432	5.19908	5.25744	5.16867	5.29757	5.09447	4.97757	5.06952
CG7048	0.192817	0.0466667	24	0	0.0232398	5.51334	5.55426	5.50136	5.51273	5.50294	5.38674	5.46572	5.47472	5.46752	5.51003	5.53378
Glu-RI	0.192817	0.0466667	18	3	0.0235325	2.1764	2.18481	2.17024	2.14791	2.23185	2.16341	2.13663	2.13341	2.21526	2.17669	2.38313
CG42542	0.192817	0.0466667	18	12	0.023565	4.9854	5.02606	4.9462	4.98913	5.00097	5.02247	5.05937	5.00162	4.85357	4.89359	4.89834
ens	0.192817	0.0466667	18	6	0.0236553	6.12592	6.13105	6.15734	6.13947	6.23718	6.1215	5.9886	6.12571	6.20239	6.10241	6.13871
CG31391	0.0763085	0.00515152	24	0	0.0238622	1.10588	1.07955	1.0481	1.06572	1.05216	1.04822	1.039	1.0373	1.0772	1.09928	1.06237
CG3499	0.149386	0.0243939	24	3	0.0239202	5.90535	5.92343	5.88788	5.8981	5.88861	5.86624	5.83036	5.83601	5.87878	5.92286	5.86485
Rtc1	0.0515997	0.0019697	18	12	0.0239638	3.36618	3.39328	3.39441	3.4085	3.39685	3.42969	3.47962	3.41276	3.37865	3.38929	3.34793
CG43427	0.192817	0.0466667	18	3	0.0239845	5.20388	5.24251	5.22201	5.23451	5.2571	5.20125	5.0323	5.21206	5.30855	5.24336	5.29178
VhaM9.7-b	0.0763085	0.00515152	18	9	0.0240752	7.27151	7.22412	7.30302	7.32948	7.32867	7.2839	7.2965	7.30417	7.28049	7.26639	7.22843
dar1	0.108914	0.0118182	18	3	0.0241893	2.27868	2.32514	2.24112	2.24034	2.2995	2.27299	2.21595	2.21981	2.46396	2.37231	2.30409
CG4332	0.192817	0.0466667	18	3	0.0242391	2.9732	2.90352	2.87876	2.88089	2.91765	2.82989	2.88272	2.88402	3.00283	2.92409	3.00871
vav	0.149386	0.0243939	24	3	0.0243324	4.20688	4.21394	4.17719	4.18782	4.17523	4.15454	4.0557	4.14367	4.22085	4.17157	4.15944
ec	0.0763085	0.00515152	18	3	0.0243438	1.75566	1.7771	1.77626	1.7586	1.76541	1.7271	1.66949	1.74341	1.83141	1.8221	1.79452
mib2	0.192817	0.0466667	24	3	0.0246443	4.88498	4.89135	4.86185	4.8658	4.84733	4.8601	4.77697	4.82495	4.85923	4.84138	4.8202
CG31612	0.149386	0.0243939	24	0	0.0248161	1.44173	1.48407	1.43362	1.42629	1.44135	1.38161	1.40185	1.39434	1.44375	1.40909	1.46423
sec24	0.108914	0.0118182	24	3	0.0248417	4.83229	4.86545	4.83124	4.80193	4.80129	4.79808	4.70184	4.80051	4.79863	4.80134	4.76443
pen	0.149386	0.0243939	24	3	0.0250011	3.97332	3.97853	3.98186	3.93209	3.93763	3.90449	3.90617	3.9117	3.92679	3.9375	3.95728
Nelf-A	0.108914	0.0118182	24	0	0.0250165	3.61199	3.62462	3.57494	3.57135	3.59864	3.55867	3.40616	3.54535	3.60674	3.57831	3.56352
CG6724	0.108914	0.0118182	24	0	0.0250385	3.45856	3.52202	3.42852	3.44256	3.44138	3.34139	3.41412	3.42249	3.42802	3.47581	3.44965
Vps4	0.149386	0.0243939	24	0	0.0251716	5.73503	5.79209	5.71708	5.70278	5.65212	5.69981	5.69974	5.68201	5.71874	5.71429	5.73612
CG2116	0.149386	0.0243939	18	3	0.0253211	3.70592	3.73422	3.62773	3.67303	3.59758	3.62016	3.66582	3.60663	3.74068	3.76049	3.70627
PhKgamma	0.0515997	0.0019697	18	12	0.0254144	6.36333	6.40537	6.39277	6.41908	6.39278	6.44153	6.44052	6.42528	6.30973	6.35795	6.31868
Med	0.149386	0.0243939	18	3	0.0254272	4.02739	4.10125	3.998	4.00904	3.98532	3.98226	3.87016	4.01675	4.09603	4.10714	4.0322
CG17819	0.0763085	0.00515152	18	0	0.0254661	1.07833	1.09427	1	1.03888	1.02644	1.07098	1.05457	1.04899	1.09345	1.06191	1.05767
CG14609	0.192817	0.0466667	24	0	0.025645	1.13443	1.09387	1.06493	1.08476	1.08197	1.04133	1.04	1.05026	1.07371	1.1606	1.06916
CG10616	0.108914	0.0118182	24	3	0.026008	4.14746	4.16734	4.14767	4.16445	4.16742	4.11743	4.11023	4.00883	4.14507	4.13054	4.13189
CG17841	0.0763085	0.00515152	18	3	0.0260839	7.44794	7.50205	7.41045	7.42201	7.46111	7.41639	7.38275	7.42163	7.59855	7.62262	7.54754
CG8858	0.192817	0.0466667	24	0	0.0261307	3.30681	3.35448	3.30021	3.2785	3.28692	3.27518	3.14312	3.27036	3.30849	3.27172	3.35167
CG33340	0.149386	0.0243939	24	21	0.0264854	2.3427	1.00778	1	1	1.00374	1	1.01165	1.00465	1.03124	2.7273	1.30861
CG2889	0.149386	0.0243939	24	0	0.0265428	3.89096	3.88961	3.86824	3.81045	3.83645	3.81471	3.80054	3.7834	3.82024	3.84345	3.83871
CG1418	0.192817	0.0466667	18	0	0.026583	4.70646	4.56766	4.52406	4.54555	4.51722	4.53701	4.61405	4.55321	4.59957	4.63545	4.56011
bab1	0.0355378	0.000606061	24	0	0.026826	1.53487	1.52955	1.49102	1.5225	1.50914	1.47688	1.45896	1.48344	1.52555	1.52529	1.51739
CG30496	0.192817	0.0466667	18	3	0.0268639	2.62183	2.61342	2.60561	2.61917	2.60182	2.54392	2.54546	2.58929	2.66473	2.62937	2.59865
18w	0.149386	0.0243939	18	3	0.0269731	4.16969	4.25376	4.17372	4.14716	4.15606	4.12627	3.97917	4.16513	4.31675	4.28094	4.17282
CG7208	0.192817	0.0466667	18	3	0.0271414	1.23423	1.14973	1.18009	1.17023	1.13936	1.15916	1.10224	1.13263	1.18235	1.28275	1.22518
CG9940	0.149386	0.0243939	24	6	0.027259	3.8052	3.82395	3.8518	3.82824	3.83445	3.75532	3.79584	3.81441	3.81258	3.72602	3.79097
GstE5	0.192817	0.0466667	18	12	0.0273668	5.00714	5.05283	5.08253	5.23233	5.02781	5.03657	5.14001	5.11298	4.7555	4.82402	4.82917
nxf2	0.192817	0.0466667	24	0	0.0276139	1.69185	1.72385	1.58587	1.6196	1.63796	1.59813	1.60078	1.58841	1.61916	1.63805	1.62113
CG2124	0.0515997	0.0019697	18	3	0.0276508	2.35853	2.39637	2.35693	2.35069	2.38263	2.33618	2.31863	2.32159	2.40951	2.40129	2.39113
Cyp6d2	0.108914	0.0118182	18	12	0.0276624	3.67122	3.70059	3.72385	3.89833	3.82834	3.73879	3.90332	3.7639	3.38175	3.53768	3.49203
CG15744	0.192817	0.0466667	18	3	0.0277425	1.90647	1.97362	1.93751	1.93491	1.93963	1.89385	1.81512	1.91437	1.98056	1.9506	1.93978
CG2747	0.149386	0.0243939	18	3	0.0278931	4.35697	4.36665	4.38318	4.32012	4.35044	4.32532	4.2244	4.32502	4.40618	4.37871	4.45091
eEF1delta	0.192817	0.0466667	24	6	0.0280346	7.43819	7.44252	7.48258	7.48247	7.45018	7.41353	7.57002	7.43291	7.34757	7.41947	7.40855
Klp68D	0.149386	0.0243939	18	3	0.0280413	3.75832	3.70322	3.72434	3.70308	3.6792	3.69018	3.55974	3.6783	3.74321	3.7126	3.78651
CG34183	0.192817	0.0466667	18	3	0.0280637	3.69094	3.75164	3.67236	3.77371	3.67248	3.60729	3.65879	3.73825	3.77248	3.86354	3.78443
eIF3-S10	0.192817	0.0466667	18	3	0.0280664	5.73268	5.8152	5.76813	5.81328	5.73782	5.73162	5.72792	5.73478	5.84849	5.83341	5.8059
pont	0.192817	0.0466667	18	3	0.0281751	3.8189	3.84838	3.77873	3.73952	3.79067	3.70505	3.77917	3.75152	3.78474	3.88302	3.85574
crm	0.192817	0.0466667	24	0	0.0281846	3.16183	3.1913	3.10363	3.15715	3.1328	3.12695	3.02925	3.11508	3.18165	3.12823	3.13292
Phax	0.149386	0.0243939	24	0	0.0282802	3.95877	4.02178	3.93652	3.92039	3.91011	3.86084	3.90658	3.85278	3.89385	3.93664	3.92167
yip2	0.0515997	0.0019697	18	9	0.0282992	7.52594	7.50914	7.69321	7.66819	7.6684	7.6604	7.68132	7.65522	7.54497	7.54461	7.52897
CG7741	0.192817	0.0466667	24	0	0.0284967	2.76629	2.81597	2.72246	2.74454	2.78472	2.73776	2.74156	2.67263	2.79262	2.76542	2.75516
CG1847	0.192817	0.0466667	24	3	0.0287051	3.65206	3.70156	3.63851	3.6524	3.66203	3.64448	3.57275	3.56623	3.61662	3.62726	3.64729
CG4218	0.192817	0.0466667	24	0	0.0289435	1.45491	1.06458	1.02676	1.03465	1.03904	1.00479	1.04467	1.01471	1.04232	1.77371	1.05863
mrt	0.149386	0.0243939	18	3	0.0291063	4.01797	4.05197	4.07089	4.0539	4.04033	4.00412	4.00936	4.01322	4.14939	4.12652	4.11821
CG7461	0.0515997	0.0019697	18	12	0.0292111	6.94934	6.99248	7.0173	7.02548	7.00333	7.04603	7.00366	7.07022	6.81495	6.82491	6.8286
CG33172	0.108914	0.0118182	24	0	0.0292126	1.85577	1.87587	1.83733	1.82	1.84182	1.79516	1.7484	1.8137	1.82186	1.85235	1.88315
Rpt3R	0.149386	0.0243939	24	3	0.0293031	1.47682	1.46394	1.39819	1.39348	1.4123	1.35763	1.37585	1.31973	1.37828	1.48617	1.37884
Rab10	0.108914	0.0118182	24	3	0.0293376	6.51225	6.50372	6.49921	6.54356	6.5679	6.47665	6.46579	6.44253	6.49111	6.48377	6.48253
CG6179	0.149386	0.0243939	18	3	0.0293416	3.35413	3.38799	3.30029	3.24948	3.29915	3.25491	3.29885	3.2901	3.39976	3.3763	3.35807
Cyp6a15Psi	0.0763085	0.00515152	18	12	0.0293838	2.82968	2.83647	2.88963	2.87806	2.90787	2.88442	2.93924	2.90461	2.57002	2.65119	2.68133
CG4629	0.108914	0.0118182	18	0	0.0293972	4.34938	4.43546	4.27817	4.29245	4.2805	4.34574	4.3446	4.33931	4.36543	4.34317	4.36534
CG6980	0.192817	0.0466667	24	3	0.0294157	1.52544	1.50263	1.50003	1.48849	1.5814	1.4593	1.47113	1.41465	1.46554	1.51815	1.48747
scra	0.149386	0.0243939	24	3	0.0294258	1.63676	1.69223	1.62422	1.68318	1.61494	1.55941	1.60441	1.59452	1.60696	1.67085	1.5972
CG8611	0.192817	0.0466667	24	3	0.0294609	2.0272	2.09281	1.99612	2.02472	1.99261	1.94911	1.92731	1.98756	2.04498	1.98143	1.98716
CG15099	0.108914	0.0118182	18	3	0.029557	3.7671	3.82294	3.78851	3.81178	3.81844	3.78625	3.6261	3.76451	3.86213	3.84085	3.83482
CG2224	0.192817	0.0466667	24	3	0.0296332	3.66584	3.69122	3.66528	3.7088	3.65807	3.62233	3.61881	3.60481	3.66287	3.64704	3.68079
CG43795	0.149386	0.0243939	18	3	0.0296648	1.54707	1.57396	1.56819	1.56923	1.58784	1.52702	1.4633	1.53529	1.60196	1.58075	1.78941
eIF-2beta	0.192817	0.0466667	24	0	0.0298366	6.92056	6.94319	6.89071	6.85195	6.85021	6.82387	6.87	6.83928	6.85648	6.8669	6.89726
slou	0.192817	0.0466667	24	3	0.0298375	2.0166	2.07346	2.0159	2.01462	1.99595	1.98498	1.89802	1.9484	2.03185	2.00201	1.97184
glu	0.0515997	0.0019697	24	0	0.0298594	2.21272	2.23992	2.16891	2.19298	2.15971	2.14882	2.08652	2.15598	2.18208	2.17064	2.19747
mtm	0.149386	0.0243939	24	3	0.0298636	4.40469	4.44685	4.36765	4.40379	4.37261	4.34332	4.32975	4.29163	4.36824	4.41056	4.36191
Srp54	0.149386	0.0243939	18	3	0.0298754	4.36573	4.35814	4.33298	4.40789	4.36161	4.33999	4.31762	4.28025	4.43491	4.39429	4.4428
wge	0.149386	0.0243939	24	3	0.029891	4.09501	4.16479	4.0888	4.08886	4.13316	4.08152	3.94691	4.08442	4.08506	4.06086	4.05857
SrpRbeta	0.192817	0.0466667	24	3	0.0299054	4.54947	4.5445	4.53667	4.51028	4.49551	4.399	4.49149	4.49175	4.40442	4.53275	4.5293
CG14431	0.192817	0.0466667	24	0	0.0299104	1.57696	1.58931	1.51397	1.53847	1.56291	1.53621	1.48866	1.51911	1.54324	1.53881	1.60847
CG18600	0.108914	0.0118182	18	0	0.0301872	3.58765	3.6276	3.54638	3.46241	3.5093	3.55079	3.60176	3.55199	3.56244	3.55927	3.57157
CG4820	0.0355378	0.000606061	24	18	0.030191	3.84926	3.83349	3.82764	3.82564	3.76672	3.85912	3.84031	3.86122	3.89271	3.87015	3.92014
Eip71CD	0.149386	0.0243939	18	3	0.0303445	6.21903	6.23931	6.20103	6.19252	6.16187	6.1392	6.24743	6.08679	6.25067	6.38096	6.26891
Tango1	0.149386	0.0243939	24	3	0.0304425	5.1841	5.2458	5.21717	5.22229	5.192	5.14868	5.06636	5.17421	5.20266	5.17967	5.17619
CG1513	0.108914	0.0118182	18	3	0.0304947	5.4786	5.47304	5.48776	5.45847	5.50392	5.44452	5.37006	5.43582	5.52626	5.50665	5.53326
Cpr97Eb	0.192817	0.0466667	18	3	0.0305731	3.85346	3.69421	3.78056	3.74806	3.72451	3.67549	3.75881	3.6904	4.03105	3.96393	3.91775
CG9422	0.0355378	0.000606061	24	18	0.0306602	3.01831	3.02609	3.00783	3.01641	3.01337	3.02667	3.02272	3.05897	3.08311	3.08122	3.06281
phol	0.192817	0.0466667	18	3	0.0307973	3.47323	3.42294	3.45611	3.465	3.44508	3.45026	3.36554	3.40003	3.50706	3.47888	3.4664
Ada1-2	0.149386	0.0243939	18	3	0.0308886	2.14354	2.0938	2.16166	2.13635	2.07511	2.05029	2.11239	2.06821	2.18162	2.16946	2.20872
CG11504	0.192817	0.0466667	24	0	0.0309843	3.73503	3.77309	3.69519	3.70208	3.67705	3.72987	3.58443	3.67613	3.7078	3.72323	3.72977
Bzd	0.0763085	0.00515152	24	0	0.0310587	3.69721	3.775	3.68477	3.67554	3.63188	3.65999	3.63099	3.64288	3.68306	3.69443	3.69574
CG17840	0.192817	0.0466667	18	3	0.0311417	3.0423	3.06126	2.99854	3.04564	2.98384	2.99993	2.9724	2.9843	3.05332	3.05086	3.08468
Ranbp9	0.149386	0.0243939	18	0	0.0312339	3.54516	3.58403	3.51088	3.48519	3.46645	3.52199	3.48823	3.49856	3.53179	3.58569	3.51402
CG6785	0.192817	0.0466667	18	6	0.0314858	1.97327	1.9571	1.97852	1.97215	1.97442	1.93371	1.84608	1.80992	1.96889	1.97422	1.89567
mus81	0.192817	0.0466667	24	18	0.0316851	1.9423	1.88879	1.91791	1.82804	1.90777	1.944	1.85286	1.94485	1.95317	1.96073	1.9739
CG5937	0.192817	0.0466667	18	3	0.0317078	2.15213	2.20285	2.18436	2.15574	2.16654	2.13891	2.01655	2.13311	2.23552	2.16433	2.28671
CG8230	0.108914	0.0118182	24	0	0.0317705	5.20101	5.18363	5.11201	5.13597	5.12634	5.12588	5.06563	5.1082	5.1577	5.14787	5.11497
pxb	0.149386	0.0243939	18	6	0.0318577	1.70865	1.69271	1.71906	1.71947	1.76618	1.67356	1.6433	1.67506	1.71894	1.76087	1.78496
ana3	0.108914	0.0118182	24	0	0.0318659	1.47062	1.45382	1.43408	1.40887	1.4253	1.36642	1.34265	1.39326	1.4084	1.45156	1.43243
CG4802	0.108914	0.0118182	18	3	0.0320088	5.15664	5.19209	5.13085	5.09161	5.04262	5.07532	5.11816	5.04544	5.22292	5.36528	5.24798
CG4907	0.192817	0.0466667	24	21	0.0320584	1.14399	1.12247	1.07526	1.08469	1.07621	1.09854	1.10673	1.11309	1.15195	1.16069	1.08313
veg	0.192817	0.0466667	18	15	0.0321343	3.6708	3.65135	3.5472	3.59997	3.65528	3.67907	3.67924	3.65539	3.63678	3.64345	3.67049
GABA-B-R3	0.192817	0.0466667	18	3	0.0321484	1.69024	1.69665	1.66004	1.66624	1.65331	1.64931	1.58691	1.61645	1.703	1.63442	1.88784
CG17209	0.192817	0.0466667	24	0	0.032211	2.75086	2.86205	2.79213	2.76424	2.74879	2.73132	2.72369	2.74042	2.81215	2.80743	2.74893
Tip60	0.149386	0.0243939	24	3	0.0322157	4.14562	4.12208	4.09734	4.09104	4.08982	4.07068	4.01233	4.02291	4.07225	4.13402	4.06853
Upf1	0.108914	0.0118182	24	0	0.03224	3.8603	3.93023	3.84982	3.85666	3.83087	3.81584	3.62429	3.79642	3.87922	3.85591	3.84183
Cht3	0.192817	0.0466667	18	3	0.032478	1.67174	1.6869	1.70859	1.68704	1.6712	1.64716	1.63439	1.61697	1.70253	1.68777	1.70981
Zn72D	0.192817	0.0466667	24	0	0.0325195	4.35522	4.39791	4.35565	4.35262	4.32238	4.30944	4.25714	4.29754	4.35546	4.34861	4.36896
Psn	0.0355378	0.000606061	18	3	0.032902	4.64279	4.67723	4.61726	4.64002	4.60087	4.5821	4.60591	4.57913	4.67879	4.71051	4.68316
CG11537	0.108914	0.0118182	24	15	0.0329205	4.33228	4.34058	4.33331	4.38673	4.39393	4.43371	4.40921	4.42396	4.39241	4.37293	4.40476
DNApol-epsilon	0.0763085	0.00515152	24	21	0.0329377	1.61646	1.63398	1.58748	1.56531	1.56796	1.59002	1.57838	1.59234	1.63878	1.63831	1.61073
CG31875	0.192817	0.0466667	24	6	0.0329744	2.3613	2.35043	2.40083	2.37711	2.37957	2.33326	2.3313	2.30728	2.33262	2.27687	2.36022
Top1	0.192817	0.0466667	24	3	0.0330387	4.58129	4.59957	4.57331	4.5769	4.61329	4.57002	4.46009	4.54305	4.56254	4.50442	4.55375
CG5721	0.108914	0.0118182	24	21	0.033198	4.73716	4.78885	4.72021	4.71351	4.70585	4.7562	4.74268	4.73332	4.81048	4.76965	4.76794
smid	0.192817	0.0466667	24	3	0.0332365	4.7538	4.80821	4.76664	4.69968	4.72753	4.70272	4.6135	4.68651	4.72964	4.72044	4.70599
CG12179	0.0515997	0.0019697	18	3	0.0333097	1.76952	1.76079	1.74816	1.75334	1.75489	1.70726	1.65936	1.71831	1.77699	1.81554	1.76051
ken	0.149386	0.0243939	18	12	0.033561	3.39042	3.43398	3.39915	3.45219	3.39034	3.53491	3.42479	3.46837	3.35247	3.23333	3.24771
fzy	0.192817	0.0466667	24	0	0.033574	1.28377	1.289	1.24052	1.25681	1.27992	1.21097	1.20265	1.18167	1.23861	1.315	1.25745
Aats-cys	0.108914	0.0118182	24	0	0.0336176	4.30648	4.36146	4.259	4.27309	4.28406	4.21269	4.2216	4.21467	4.26029	4.29443	4.27087
CG4681	0.192817	0.0466667	24	0	0.0336295	1.39831	1.27298	1.27873	1.26872	1.24275	1.24137	1.22853	1.20957	1.25538	1.32946	1.27824
l(1)G0320	0.149386	0.0243939	24	3	0.033815	6.98744	6.97065	6.97008	6.96233	6.96702	6.83076	6.87806	6.81519	6.94079	7.01697	6.95493
su(w[a])	0.0763085	0.00515152	24	0	0.0339207	5.22667	5.21712	5.17806	5.18499	5.18488	5.12239	5.05713	5.13523	5.19255	5.18687	5.17172
CR43937	0.149386	0.0243939	18	3	0.0339293	1.25006	1.38393	1.21687	1.27572	1.32141	1.1758	1.27266	1.24658	1.71793	1.88736	1.78129
CG32104	0.0763085	0.00515152	24	3	0.0339585	2.45368	2.52463	2.42815	2.42092	2.4726	2.38888	2.40279	2.36414	2.41541	2.42078	2.44052
CG32755	0.192817	0.0466667	24	0	0.0339907	1.53294	1.49748	1.44976	1.49624	1.44051	1.4579	1.44907	1.43068	1.49486	1.47871	1.50503
CG5068	0.149386	0.0243939	18	0	0.0341076	4.96232	4.98639	4.89212	4.91125	4.92253	4.98589	4.93355	4.91356	4.9556	4.94891	4.95885
CG10904	0.192817	0.0466667	24	3	0.0341519	4.12422	4.08015	4.08634	4.09582	4.06101	4.01075	4.02405	4.02138	4.04382	4.06808	4.08749
eIF3-S9	0.149386	0.0243939	24	18	0.0341786	6.95662	7.02	6.95626	6.99479	6.92977	6.99906	7.01167	6.98469	7.03914	7.0692	7.02453
ns1	0.0763085	0.00515152	18	12	0.034207	4.33781	4.36646	4.42414	4.40172	4.43581	4.42243	4.46492	4.44436	4.32706	4.35208	4.3322
CG12316	0.108914	0.0118182	24	0	0.0342741	2.54466	2.56336	2.50169	2.49762	2.49829	2.47475	2.42423	2.40821	2.52159	2.47281	2.51455
arm	0.192817	0.0466667	18	3	0.034361	6.16345	6.23384	6.19934	6.21022	6.14573	6.17451	6.08782	6.1524	6.21677	6.25588	6.26348
CanB2	0.192817	0.0466667	18	9	0.0344345	6.45653	6.45755	6.56381	6.50574	6.57557	6.46037	6.53198	6.46315	6.5002	6.47266	6.46134
CG10914	0.192817	0.0466667	24	3	0.0344351	2.9256	2.93931	2.85889	2.89619	2.84123	2.7938	2.84528	2.80827	2.89539	2.88934	2.82146
CG1785	0.149386	0.0243939	18	12	0.0345221	3.38883	3.46447	3.44224	3.50898	3.47418	3.48226	3.55951	3.50382	3.3866	3.40876	3.41659
r	0.108914	0.0118182	18	3	0.0345492	2.96398	3.02099	2.92622	2.89459	2.88439	2.91187	2.83447	2.91618	3.31402	3.32095	3.19142
alpha-Man-II	0.0763085	0.00515152	18	3	0.0346288	3.3913	3.40124	3.38081	3.35573	3.37444	3.30197	3.27697	3.36889	3.38619	3.47016	3.44883
Syx8	0.192817	0.0466667	18	3	0.0346465	4.51138	4.57125	4.45116	4.55849	4.51995	4.48409	4.50717	4.44413	4.56943	4.58083	4.56289
CG6379	0.108914	0.0118182	18	3	0.0346711	3.46985	3.52841	3.46529	3.46589	3.43759	3.45421	3.35852	3.41656	3.47509	3.48613	3.49373
HBS1	0.108914	0.0118182	24	0	0.0347322	4.48467	4.62697	4.49114	4.45395	4.45273	4.43258	4.38346	4.44569	4.4601	4.54647	4.46628
CalpB	0.108914	0.0118182	18	3	0.0347843	4.51298	4.51073	4.52377	4.50994	4.50355	4.47478	4.32883	4.44791	4.55271	4.51149	4.60333
CG11125	0.0763085	0.00515152	18	3	0.034808	3.14711	3.11175	3.1221	3.10287	3.12573	3.1075	2.95879	3.01146	3.38537	3.22141	3.32299
Pex10	0.192817	0.0466667	18	12	0.0348345	3.85728	3.88781	3.93637	3.89388	3.8767	3.94153	3.98725	3.90111	3.80402	3.89648	3.83916
stan	0.192817	0.0466667	18	3	0.0348551	1.57863	1.59018	1.58838	1.56002	1.56598	1.53511	1.45151	1.5325	1.61284	1.55974	1.65619
koi	0.192817	0.0466667	24	12	0.0348929	2.38408	2.3683	2.39348	2.3985	2.45525	2.51009	2.44494	2.49573	2.44808	2.3902	2.42831
Tpc1	0.192817	0.0466667	24	9	0.034941	3.77831	3.82292	3.84141	3.84801	3.84364	3.8343	3.78579	3.78198	3.78881	3.77059	3.78011
CG8642	0.0515997	0.0019697	18	3	0.0349744	1.43177	1.49119	1.47292	1.42823	1.42334	1.4178	1.37999	1.40082	1.55477	1.48517	1.5283
l(2)k11101	0.0763085	0.00515152	24	3	0.0350585	4.63611	4.64168	4.60174	4.60063	4.62578	4.53877	4.57524	4.53202	4.62378	4.59958	4.56761
CG18809	0.149386	0.0243939	18	3	0.0352915	3.70751	3.75119	3.61852	3.60617	3.69577	3.64357	3.58067	3.6529	3.79342	3.84808	3.71127
Mob4	0.149386	0.0243939	18	3	0.0354358	5.56507	5.61902	5.58168	5.5461	5.55588	5.55382	5.50889	5.50338	5.58079	5.64371	5.61018
CG34269	0.149386	0.0243939	18	3	0.0354856	1.73363	1.75414	1.63469	1.68522	1.5624	1.55887	1.72912	1.58786	1.83422	1.89599	1.73923
Fur2	0.108914	0.0118182	24	3	0.0355588	4.49277	4.58284	4.50317	4.48518	4.48909	4.4563	4.28912	4.4456	4.4589	4.43148	4.45346
CG2199	0.0763085	0.00515152	18	9	0.0355978	3.31582	3.29969	3.44227	3.35695	3.40729	3.34059	3.33531	3.34467	3.34641	3.31902	3.32816
CG4287	0.149386	0.0243939	24	6	0.0356576	5.89402	5.87429	5.93144	5.91264	5.92322	5.88434	5.87764	5.82313	5.87446	5.81042	5.86103
p53	0.149386	0.0243939	24	3	0.0358065	3.29707	3.29277	3.25068	3.25137	3.25399	3.15453	3.24951	3.09311	3.27199	3.2186	3.23393
MRP	0.108914	0.0118182	18	12	0.0358193	5.51124	5.54348	5.6614	5.70536	5.70379	5.70462	5.59423	5.75435	5.45233	5.47915	5.45418
Cdk5	0.192817	0.0466667	18	6	0.0358286	4.29197	4.33684	4.38726	4.33842	4.35365	4.2875	4.33791	4.26291	4.32928	4.33954	4.34955
fl(2)d	0.0763085	0.00515152	18	6	0.0358682	4.96365	4.92193	4.98925	4.99614	5.01117	4.96155	4.91333	4.95144	4.99593	4.97941	4.98545
Bap55	0.108914	0.0118182	18	3	0.0358734	3.71393	3.73907	3.73233	3.78131	3.72978	3.68808	3.6886	3.62316	3.78682	3.79262	3.78435
CG7009	0.192817	0.0466667	18	3	0.0359553	4.09364	4.06173	4.07286	4.04209	4.0402	3.97996	4.04226	4.00695	4.05473	4.13539	4.13827
aux	0.0763085	0.00515152	18	3	0.0359699	4.0408	4.0912	4.0688	4.04395	4.06413	4.03052	3.95138	4.01163	4.12097	4.1687	4.15512
wee	0.108914	0.0118182	18	3	0.0359983	3.3514	3.36616	3.34518	3.36156	3.39271	3.29509	3.31835	3.30261	3.3954	3.38112	3.40265
CG9286	0.149386	0.0243939	24	15	0.0360207	4.17898	4.17296	4.19222	4.21998	4.20817	4.26499	4.30832	4.27186	4.22409	4.14292	4.22371
CG5065	0.0515997	0.0019697	18	12	0.0360685	6.14572	6.18037	6.15571	6.18763	6.22622	6.22731	6.23835	6.21485	6.08666	5.98595	6.13857
crl	0.192817	0.0466667	24	6	0.0362699	6.61454	6.596	6.69998	6.5885	6.63743	6.59019	6.57916	6.55833	6.58125	6.53553	6.56297
CG17600	0.0515997	0.0019697	18	3	0.0363854	2.82263	2.86878	2.79167	2.78747	2.82031	2.77793	2.75307	2.76827	2.82374	2.89952	2.8483
Mfap1	0.0763085	0.00515152	24	3	0.0364223	3.67473	3.66969	3.6529	3.66265	3.66872	3.59358	3.57178	3.56709	3.66726	3.62798	3.6531
CG31674	0.108914	0.0118182	18	12	0.0364873	4.45233	4.46162	4.44332	4.49494	4.48586	4.47165	4.61753	4.54294	4.20008	4.41526	4.22148
CG32068	0.149386	0.0243939	24	12	0.0365773	7.89966	7.84474	7.91279	7.96273	7.99119	7.96715	8.06615	7.95993	7.91223	7.95085	7.9508
ChLD3	0.192817	0.0466667	24	3	0.0366218	1.78235	1.7498	1.68542	1.70061	1.69759	1.64732	1.65032	1.67643	1.64039	1.74797	1.68296
MED24	0.192817	0.0466667	18	3	0.0366235	3.71774	3.72068	3.75855	3.72559	3.73457	3.68566	3.62375	3.67989	3.77066	3.77792	3.79851
CG31029	0.192817	0.0466667	24	0	0.0367485	1.39178	1.26172	1.22976	1.20215	1.24455	1.18333	1.21053	1.20991	1.22622	1.46326	1.25396
CG5554	0.192817	0.0466667	18	3	0.0368029	5.2973	5.30698	5.28867	5.35931	5.34297	5.2691	5.29978	5.23619	5.38271	5.44442	5.3776
Su(z)12	0.0763085	0.00515152	18	0	0.0368663	3.32021	3.35708	3.2837	3.26018	3.26598	3.2857	3.21634	3.29211	3.30425	3.31242	3.3169
Taf6	0.0515997	0.0019697	18	3	0.0368902	4.07308	4.09315	4.07856	4.09003	4.05743	4.0512	3.97631	4.00523	4.11705	4.10406	4.12255
eRF1	0.108914	0.0118182	18	6	0.0369914	5.88102	5.90106	5.96982	5.94386	5.94067	5.89095	5.88967	5.89215	5.9146	5.89316	5.93211
mRNA-cap	0.192817	0.0466667	24	3	0.0370165	5.49232	5.47901	5.48288	5.43639	5.43743	5.43452	5.37447	5.39181	5.46091	5.42104	5.39044
Sym	0.192817	0.0466667	24	0	0.0370901	3.33757	3.40398	3.33954	3.27488	3.29537	3.30988	3.21936	3.24133	3.33015	3.3119	3.32712
CG8405	0.192817	0.0466667	24	3	0.0370932	5.36767	5.43229	5.40676	5.33196	5.40025	5.3279	5.15047	5.30288	5.38971	5.36488	5.3544
Cyp6u1	0.0355378	0.000606061	18	3	0.037133	3.74655	3.7723	3.74189	3.75572	3.71927	3.67961	3.71417	3.68991	3.80203	3.81894	3.77583
Dhod	0.149386	0.0243939	18	0	0.0371762	5.36072	5.32224	5.27743	5.207	5.27933	5.28359	5.3001	5.248	5.32181	5.29648	5.2824
CG6276	0.108914	0.0118182	24	3	0.0372057	4.61562	4.62226	4.58457	4.57129	4.5189	4.51288	4.50878	4.48918	4.56456	4.57428	4.53105
cutlet	0.0515997	0.0019697	18	3	0.0372515	1.52827	1.47904	1.42926	1.46841	1.45439	1.42711	1.40197	1.41498	1.50783	1.4894	1.54197
CG33509	0.149386	0.0243939	18	12	0.0372701	3.16473	3.1562	3.17375	3.25412	3.17467	3.17448	3.44075	3.22627	2.94529	3.1659	3.01268
Pdp	0.108914	0.0118182	18	0	0.0373628	4.29696	4.27231	4.19464	4.19957	4.17979	4.25318	4.23207	4.2233	4.2774	4.26308	4.21889
pnr	0.149386	0.0243939	18	3	0.0373773	1.80933	1.8482	1.79601	1.82694	1.84138	1.78076	1.77203	1.77421	1.87086	1.85273	1.82314
CG34287	0.149386	0.0243939	24	0	0.0373793	1.15537	1.09157	1.07533	1.06543	1.08791	1.04328	1.0373	1.01683	1.04836	1.11782	1.12045
Cbp80	0.0763085	0.00515152	24	0	0.0374128	4.10297	4.08342	4.0508	4.02111	4.05992	3.99543	3.95253	4.01521	4.05421	4.07181	4.04301
Ire1	0.0763085	0.00515152	18	12	0.0374824	4.46283	4.47212	4.51156	4.52758	4.51559	4.59906	4.49064	4.57899	4.42382	4.40869	4.42896
CG17278	0.108914	0.0118182	24	6	0.0376437	5.05734	5.05076	5.0766	5.0519	5.07141	5.02173	5.01981	5.06378	5.00773	4.92254	4.87229
Ice2	0.108914	0.0118182	24	0	0.0377959	2.539	2.6052	2.50746	2.48959	2.52578	2.45823	2.3598	2.47467	2.4801	2.53211	2.51725
Nbr	0.0194852	0.000151515	18	3	0.0379563	4.20086	4.1942	4.15415	4.15256	4.17392	4.11525	4.12601	4.12342	4.23029	4.21668	4.26807
CG6404	0.149386	0.0243939	24	21	0.0379565	3.95056	3.91828	3.86765	3.86835	3.8576	3.87553	3.86584	3.87984	3.92257	3.96389	3.88923
CG14870	0.192817	0.0466667	18	3	0.0379988	1.22372	1.25643	1.25443	1.29124	1.25904	1.18865	1.20849	1.1988	1.26347	1.49911	1.32923
stc	0.149386	0.0243939	24	0	0.0380109	4.01484	4.07784	3.98615	4.04183	3.96005	3.97465	3.91646	3.95498	4.00417	4.04881	3.98922
CG7149	0.192817	0.0466667	18	12	0.038038	4.06938	4.11306	4.12723	4.0826	4.16483	4.03539	4.28867	4.18305	3.67658	3.74818	3.99435
IP3K2	0.192817	0.0466667	18	12	0.0380621	4.42451	4.40065	4.39512	4.42492	4.40649	4.48887	4.43622	4.59984	4.38825	4.38772	4.41334
GckIII	0.192817	0.0466667	24	0	0.0382396	4.42551	4.42524	4.37103	4.40068	4.35922	4.37028	4.29526	4.37677	4.41608	4.43073	4.38552
Rcd-1	0.108914	0.0118182	24	0	0.0383142	5.61102	5.55064	5.54185	5.52395	5.55943	5.51063	5.48476	5.51653	5.58996	5.59438	5.54622
CG4901	0.108914	0.0118182	24	3	0.0384595	3.55651	3.51967	3.53829	3.56332	3.52444	3.43804	3.46861	3.47681	3.49769	3.5069	3.51297
CG7352	0.192817	0.0466667	18	3	0.0384975	1.4219	1.41048	1.32612	1.40054	1.36638	1.3528	1.32881	1.32659	1.36922	1.47936	1.43801
CG5510	0.108914	0.0118182	24	0	0.0385351	5.16642	5.26057	5.16742	5.1526	5.1558	5.12647	5.09418	5.13572	5.17498	5.22623	5.17788
Gdi	0.108914	0.0118182	24	15	0.0385611	6.8499	6.88901	6.91053	6.96961	6.9313	6.97384	6.97777	6.9841	6.97618	6.9773	6.98086
OstStt3	0.0763085	0.00515152	24	3	0.0385891	5.77436	5.7787	5.75495	5.75224	5.77048	5.69	5.71461	5.69778	5.74804	5.76111	5.70026
hrg	0.192817	0.0466667	18	6	0.038602	4.53538	4.50799	4.5696	4.5381	4.64144	4.52434	4.37195	4.51281	4.56542	4.5342	4.62846
CG10132	0.0763085	0.00515152	18	3	0.0386098	3.72731	3.73218	3.72324	3.67036	3.71343	3.72387	3.51504	3.64269	3.74036	3.74794	3.76135
Glycogenin	0.192817	0.0466667	24	3	0.0386401	6.68136	6.64175	6.63773	6.61983	6.63528	6.62511	6.50898	6.60241	6.62775	6.57961	6.53328
vret	0.192817	0.0466667	24	0	0.0386491	1.61501	1.61549	1.58044	1.59081	1.54715	1.49943	1.55567	1.51903	1.58516	1.61885	1.57706
Exp6	0.192817	0.0466667	24	0	0.0386777	3.73537	3.7654	3.65728	3.69479	3.72047	3.68082	3.59808	3.71179	3.73678	3.71408	3.74943
mon2	0.149386	0.0243939	24	3	0.03868	4.10921	4.14824	4.10329	4.10864	4.13976	4.03162	3.92935	4.02892	4.11856	4.09427	4.10685
pbl	0.192817	0.0466667	18	12	0.0387667	3.06606	3.0279	3.07278	3.02042	3.09389	3.235	3.07774	3.11219	3.05877	3.02255	2.98985
CG7441	0.108914	0.0118182	24	0	0.0387857	4.38137	4.45023	4.34624	4.34873	4.32695	4.31081	4.25759	4.27985	4.36932	4.35854	4.30878
Pgant35A	0.108914	0.0118182	18	3	0.0388906	2.96848	2.92324	2.89048	2.92901	2.84698	2.89657	2.81174	2.86575	2.97341	2.98811	2.97171
fru	0.192817	0.0466667	24	0	0.0389221	2.48732	2.45519	2.43412	2.36017	2.45085	2.35848	2.23147	2.41472	2.46276	2.37789	2.43446
mim	0.192817	0.0466667	24	0	0.0389349	4.13585	4.13466	4.09771	4.09917	4.15881	4.02488	3.85524	4.06747	4.19249	4.10737	4.13387
gammaCop	0.108914	0.0118182	24	3	0.0389882	4.91718	4.99158	4.89895	4.89269	4.86813	4.7951	4.81602	4.85819	4.84867	4.90449	4.86735
CG32547	0.0763085	0.00515152	18	3	0.0389976	1.88372	1.93563	1.8733	1.89949	1.90154	1.85959	1.79295	1.83904	1.90261	1.93916	1.94397
CG14043	0.149386	0.0243939	24	0	0.0390151	3.6267	3.62077	3.57502	3.56598	3.52369	3.52354	3.55459	3.54241	3.59994	3.54766	3.60526
CG16786	0.108914	0.0118182	18	6	0.0390602	1.57544	1.59094	1.62912	1.62348	1.61694	1.58424	1.52245	1.55549	1.60749	1.59175	1.64535
raps	0.192817	0.0466667	24	0	0.0391272	3.64309	3.66717	3.61076	3.62498	3.54838	3.56136	3.51541	3.53091	3.56899	3.57753	3.66502
Vha68-1	0.192817	0.0466667	24	3	0.0391641	7.00678	7.02404	7.04837	6.96236	7.01142	6.94282	6.9169	6.91317	6.99426	6.98334	6.96996
Tpc2	0.108914	0.0118182	24	0	0.0391728	1.34411	1.24841	1.21683	1.20594	1.19508	1.16934	1.15279	1.16665	1.20739	1.31672	1.19863
CG3271	0.108914	0.0118182	18	3	0.0392379	3.66635	3.62482	3.63252	3.601	3.62977	3.59415	3.55169	3.56316	3.63637	3.65799	3.69285
CG17337	0.149386	0.0243939	18	9	0.039241	6.20312	6.16882	6.25789	6.27349	6.27938	6.23834	6.28226	6.21892	6.19154	6.2062	6.23145
CG33293	0.0763085	0.00515152	18	3	0.0393182	2.41018	2.34565	2.31369	2.27472	2.28525	2.27076	2.21917	2.31016	2.35232	2.49468	2.42827
CG3608	0.108914	0.0118182	24	0	0.0393823	3.17209	3.13561	3.135	3.10688	3.0872	2.98037	3.10183	3.01569	3.13919	3.12836	3.15432
D1	0.149386	0.0243939	18	6	0.0394758	5.1006	5.11213	5.1211	5.17215	5.13495	5.07737	5.07033	5.05766	5.11654	5.14056	5.17979
CG7878	0.192817	0.0466667	24	3	0.0396249	4.69684	4.79048	4.75402	4.69098	4.74461	4.6832	4.61827	4.68117	4.66965	4.70756	4.68547
Fbxl4	0.149386	0.0243939	24	0	0.0396398	3.68974	3.68372	3.67176	3.64925	3.60336	3.63333	3.57191	3.62948	3.6692	3.67566	4.2132
Su(var)3-3	0.108914	0.0118182	18	3	0.0396468	2.08553	2.16355	2.07954	2.06622	2.04147	2.06932	1.9714	2.01681	2.1232	2.10418	2.16372
DNApol-delta	0.108914	0.0118182	18	0	0.0396652	2.69421	2.77295	2.62637	2.58331	2.65867	2.67108	2.63373	2.63303	2.64955	2.6752	2.68318
l(2)k05819	0.0763085	0.00515152	18	3	0.0396954	3.39783	3.42395	3.37001	3.3968	3.3791	3.34963	3.29624	3.32799	3.40553	3.40689	3.40622
CG8273	0.192817	0.0466667	24	3	0.0397299	3.23882	3.18028	3.21798	3.19687	3.22569	3.11209	3.07718	3.14931	3.18575	3.21143	3.1692
CG34325	0.149386	0.0243939	18	12	0.0397335	4.63046	4.61267	4.53666	4.66533	4.64142	4.68758	4.74171	4.63599	4.29559	4.42134	4.56385
CG33331	0.0763085	0.00515152	18	3	0.0397539	2.1601	2.12484	2.09756	2.138	2.05667	2.08584	2.06593	2.04208	2.19242	2.20341	2.16272
CG17265	0.149386	0.0243939	18	6	0.0397995	1.72818	1.72474	1.72179	1.77388	1.80534	1.70434	1.69049	1.66452	1.7621	1.7291	1.75821
CG6693	0.149386	0.0243939	24	21	0.0399526	3.94322	3.91902	3.8244	3.87777	3.92226	3.91416	3.94749	3.90376	3.94843	4.03851	3.97578
CG9951	0.0515997	0.0019697	18	3	0.0399697	3.79567	3.8523	3.81919	3.81802	3.77934	3.75762	3.77275	3.73107	3.8697	3.85464	3.87753
Hrs	0.192817	0.0466667	18	0	0.040079	4.64222	4.67155	4.58485	4.58169	4.57784	4.63237	4.49524	4.60656	4.61594	4.5871	4.63877
CSN6	0.108914	0.0118182	18	15	0.0401428	4.63424	4.6137	4.61753	4.56485	4.59372	4.6458	4.71873	4.67334	4.62828	4.62762	4.61891
CG6734	0.0763085	0.00515152	18	3	0.0402522	2.4721	2.53873	2.46425	2.48334	2.47633	2.42115	2.33279	2.43188	2.52494	2.54605	2.54132
pUf68	0.192817	0.0466667	18	3	0.0403049	5.46157	5.5113	5.45164	5.47715	5.44458	5.44818	5.37208	5.39568	5.4718	5.47934	5.496
MYPT-75D	0.192817	0.0466667	24	9	0.0403568	3.79142	3.76767	3.82627	3.8224	3.87948	3.86788	3.80488	3.81688	3.81233	3.77912	3.74418
CG8243	0.192817	0.0466667	18	0	0.0403864	3.83974	3.90926	3.79418	3.77555	3.72477	3.79409	3.77481	3.78969	3.84206	3.89503	3.80456
CG5555	0.108914	0.0118182	18	3	0.0405899	4.38142	4.38189	4.36943	4.37811	4.34493	4.32414	4.2968	4.31981	4.41897	4.35195	4.4194
Pex2	0.149386	0.0243939	18	12	0.0407578	3.99435	4.01164	4.0822	4.14435	4.07608	4.10456	4.14751	4.07688	4.01522	3.98726	3.96167
Apc2	0.108914	0.0118182	24	0	0.040777	1.47987	1.49846	1.4711	1.46868	1.42482	1.35961	1.34923	1.36931	1.4296	1.44771	1.4751
Mhcl	0.149386	0.0243939	18	3	0.0408217	4.38707	4.48771	4.45786	4.47158	4.46847	4.44722	4.30214	4.40986	4.54906	4.54277	4.54585
CG1671	0.149386	0.0243939	18	0	0.0408261	3.20212	3.21397	3.11601	3.12662	3.08356	3.15445	3.14617	3.18755	3.16659	3.23209	3.15355
yuri	0.0515997	0.0019697	18	12	0.0409538	3.29638	3.31819	3.34104	3.37643	3.30344	3.37231	3.3875	3.37991	3.11816	3.22426	3.11703
CG2540	0.192817	0.0466667	24	0	0.0409865	3.28874	3.35003	3.28905	3.32009	3.27278	3.24223	3.23773	3.14063	3.28189	3.33422	3.34134
CG6984	0.149386	0.0243939	18	12	0.0409921	3.74592	3.76364	3.73169	3.79339	3.73994	3.80426	3.93037	3.79753	3.73205	3.7078	3.66587
Tpr2	0.0194852	0.000151515	18	12	0.0411118	6.4089	6.39523	6.42111	6.43832	6.43476	6.48799	6.53978	6.45829	6.3853	6.37911	6.38988
CG4896	0.0355378	0.000606061	18	3	0.0411705	3.5573	3.55335	3.53622	3.52063	3.55546	3.51846	3.45543	3.47849	3.5769	3.56762	3.61592
CG1024	0.149386	0.0243939	24	3	0.0411795	2.76753	2.80301	2.75074	2.76236	2.78055	2.67713	2.68234	2.65755	2.7413	2.76228	2.77425
CG5484	0.192817	0.0466667	24	0	0.0413096	4.88432	4.85813	4.85914	4.80994	4.79106	4.78519	4.80985	4.7742	4.83352	4.90909	4.82815
SNF1A	0.192817	0.0466667	18	0	0.041319	6.00229	6.05761	5.93448	5.97145	5.91807	5.98863	5.94306	5.93472	5.99514	6.08887	5.97112
CG6686	0.192817	0.0466667	18	6	0.041432	4.77572	4.79185	4.86217	4.77586	4.81685	4.74558	4.70312	4.75477	4.79579	4.77731	4.85264
CycH	0.149386	0.0243939	24	0	0.0414512	3.23344	3.0896	3.04956	3.03229	3.11801	3.01022	3.01853	3.01114	3.08423	3.06086	3.09158
CG4766	0.149386	0.0243939	18	6	0.041491	2.99362	2.98377	3.02439	3.02618	3.08851	2.95914	2.9713	2.96527	3.04711	3.10011	3.01582
Lrr47	0.192817	0.0466667	18	3	0.0415957	2.1275	2.0432	2.09558	2.07703	2.03938	1.99203	2.02733	2.02003	2.06744	2.09761	2.13691
CG6744	0.149386	0.0243939	18	0	0.0416267	3.6439	3.70443	3.56778	3.5981	3.51868	3.61665	3.6266	3.63919	3.7043	3.65852	3.60282
CG9125	0.149386	0.0243939	18	3	0.0416557	3.57948	3.57537	3.52672	3.52972	3.5361	3.4587	3.53906	3.43775	3.64948	3.54927	3.59439
ewg	0.192817	0.0466667	18	6	0.0416809	3.27535	3.25522	3.29414	3.27949	3.37612	3.24371	3.16797	3.22667	3.35383	3.29037	3.43911
sut3	0.149386	0.0243939	18	6	0.0416888	1.34931	1.34048	1.37723	1.4082	1.43394	1.32206	1.34244	1.31918	1.36697	1.47654	1.34698
CG3530	0.108914	0.0118182	24	0	0.0416898	4.2432	4.23904	4.17997	4.21277	4.22395	4.1752	4.13543	4.18435	4.23906	4.22703	4.34126
CG3634	0.192817	0.0466667	24	0	0.0418401	4.03148	4.0549	4.02103	4.05258	3.97659	3.92586	3.93557	3.93538	4.02233	4.04625	3.99397
CG4880	0.192817	0.0466667	24	0	0.0418599	2.87637	2.90026	2.84023	2.81454	2.79382	2.8256	2.75884	2.76545	2.81105	2.83324	2.86889
Dbp45A	0.108914	0.0118182	18	6	0.0419155	4.44264	4.46289	4.50218	4.49143	4.49342	4.40433	4.44355	4.39114	4.44395	4.45879	4.44519
Cenp-C	0.192817	0.0466667	24	3	0.0419517	2.03464	2.01779	2.06449	1.97353	2.0224	1.9518	1.89343	1.94048	2.01505	1.98808	1.98105
CG43367	0.149386	0.0243939	24	3	0.0420015	3.84418	3.93158	3.85702	3.86895	3.90801	3.79808	3.68248	3.79912	3.85138	3.84874	3.83736
CG3815	0.149386	0.0243939	24	0	0.0420607	2.91389	2.91526	2.85825	2.85027	2.80719	2.83486	2.76984	2.7972	2.86028	2.89075	2.79999
l(2)35Bg	0.0763085	0.00515152	24	6	0.0420704	4.44735	4.48697	4.53539	4.48042	4.48655	4.43686	4.43818	4.42488	4.41675	4.37067	4.43682
CG6180	0.149386	0.0243939	18	12	0.0420982	6.5975	6.66412	6.6666	6.70957	6.62148	6.68163	6.7202	6.73276	6.58562	6.61618	6.6285
Rfx	0.192817	0.0466667	24	0	0.0421812	3.11668	3.16717	3.15999	3.10383	3.09208	3.05207	2.92395	3.00281	3.11237	3.09266	3.14978
PQBP1	0.149386	0.0243939	18	3	0.0422431	3.25624	3.30464	3.29735	3.23978	3.24583	3.15528	3.27348	3.18005	3.3289	3.29953	3.3339
Snap24	0.192817	0.0466667	18	6	0.0422518	4.75533	4.78477	4.81891	4.79022	4.87753	4.76438	4.75881	4.67278	4.80803	4.77444	4.8468
Ubx	0.192817	0.0466667	24	15	0.0422519	1.95014	1.94665	1.9841	2.03055	1.98781	2.04238	2.04745	2.10269	1.97593	2.04947	1.98859
wah	0.192817	0.0466667	18	6	0.0423317	4.33338	4.37592	4.36711	4.38569	4.40178	4.32486	4.19298	4.31687	4.40889	4.36384	4.35659
CR33319	0.108914	0.0118182	24	0	0.0423411	1.36933	1.09533	1.04877	1.06984	1.02878	1.0348	1.03738	1.01798	1.0768	1.52958	1.07146
eIF4AIII	0.108914	0.0118182	24	3	0.0423429	5.45525	5.4711	5.42795	5.42881	5.45408	5.40086	5.39934	5.3421	5.38533	5.36753	5.40167
ScpX	0.192817	0.0466667	18	12	0.0423454	6.07607	6.04751	6.11951	6.11051	6.01459	6.14151	6.10763	6.14714	6.05159	6.01354	6.00785
angel	0.0763085	0.00515152	18	3	0.042486	2.58878	2.57679	2.54492	2.56334	2.47905	2.48676	2.55752	2.45762	2.63778	2.60148	2.60068
CG3831	0.108914	0.0118182	18	3	0.0424886	2.55805	2.52045	2.49133	2.51541	2.61071	2.45586	2.48623	2.47849	2.56371	2.61343	2.57425
CG8204	0.192817	0.0466667	24	0	0.0424906	3.62445	3.56334	3.52408	3.52668	3.59025	3.46624	3.49202	3.49823	3.55522	3.5716	3.57275
CG34459	0.192817	0.0466667	24	3	0.0425253	2.87917	2.6611	2.64502	2.58487	2.62779	2.55321	2.57453	2.60089	2.60133	2.60963	2.54211
pyd3	0.192817	0.0466667	18	9	0.0425492	5.85397	5.79971	5.92591	5.9148	5.9634	5.87639	5.89955	5.80985	5.85836	5.79658	5.89729
CG1635	0.192817	0.0466667	24	3	0.0425493	5.25558	5.26475	5.22475	5.23063	5.21058	5.19142	5.15679	5.18649	5.18003	5.16125	5.18087
tara	0.192817	0.0466667	18	3	0.0425959	3.40649	3.3555	3.37346	3.36621	3.38398	3.35404	3.16518	3.2921	3.4943	3.44097	3.36784
CG11906	0.149386	0.0243939	24	0	0.0426765	2.97921	3.00463	2.95859	2.91259	2.95254	2.92282	2.82938	2.87987	2.97114	3.00597	2.93022
Bub1	0.0763085	0.00515152	24	3	0.0426815	3.37065	3.34957	3.35423	3.35343	3.35635	3.25022	3.15816	3.26036	3.34928	3.31748	3.32534
pie	0.192817	0.0466667	18	0	0.0426879	1.82196	1.74987	1.65614	1.66772	1.63813	1.66353	1.69859	1.68921	1.66097	1.79094	1.71021
CG9531	0.108914	0.0118182	24	18	0.0427252	3.04011	3.00898	2.94224	2.93485	3.01817	3.06859	3.02823	3.0434	3.11057	3.064	3.04703
Ptpa	0.108914	0.0118182	24	3	0.0428057	5.51062	5.52434	5.49417	5.50719	5.49365	5.34874	5.47999	5.36801	5.46394	5.49558	5.43047
Aldh	0.192817	0.0466667	24	18	0.0428445	9.3135	9.35578	9.38743	9.32779	9.29873	9.35719	9.3888	9.34007	9.48429	9.43339	9.41374
GXIVsPLA2	0.192817	0.0466667	24	0	0.042847	5.49546	5.44013	5.46436	5.39729	5.42242	5.37815	5.41215	5.31616	5.4315	5.48255	5.45789
Pif1A	0.192817	0.0466667	24	6	0.0428574	1.67009	1.67903	1.71282	1.69509	1.7021	1.61755	1.57753	1.66181	1.64474	1.6399	1.62033
Ark	0.149386	0.0243939	24	6	0.0429133	3.80207	3.80188	3.84453	3.80595	3.91182	3.79655	3.69507	3.76976	3.78375	3.72346	3.79351
Pex3	0.149386	0.0243939	18	9	0.0429744	4.48305	4.53156	4.55209	4.62252	4.56257	4.61413	4.54701	4.56092	4.54066	4.51121	4.51985
Uba2	0.192817	0.0466667	24	0	0.0429848	4.92256	4.98045	4.97381	4.91317	4.93279	4.89736	4.88828	4.90588	4.97031	4.97502	4.97585
CG33056	0.149386	0.0243939	18	9	0.0430812	5.96715	5.92965	6.11399	6.11341	6.10084	6.12025	6.08178	6.07538	6.09953	6.03704	5.98489
Grip128	0.192817	0.0466667	24	0	0.0432152	2.65431	2.71877	2.65601	2.62315	2.63414	2.5989	2.47031	2.53452	2.63404	2.62319	2.67819
CG8159	0.192817	0.0466667	24	3	0.043295	2.66385	2.69108	2.69558	2.6587	2.64011	2.59836	2.57799	2.54096	2.67316	2.62766	2.64682
CG9941	0.0763085	0.00515152	18	3	0.0433803	3.78225	3.81871	3.79643	3.81673	3.78844	3.73787	3.67716	3.74622	3.84106	3.85295	3.90536
lwr	0.108914	0.0118182	24	18	0.0433965	4.99473	4.94086	4.95784	4.98617	4.98328	4.9949	5.01224	5.04737	5.05614	5.0439	5.04847
Nle	0.149386	0.0243939	18	15	0.0434362	3.4898	3.50332	3.45743	3.42476	3.43199	3.47603	3.56924	3.50926	3.40678	3.47233	3.46085
CG14290	0.192817	0.0466667	18	12	0.0435731	7.29424	7.227	7.22966	7.23013	7.20691	7.27666	7.38318	7.28996	7.18048	7.19434	7.1974
Sug	0.192817	0.0466667	18	12	0.0435948	3.16625	3.32735	3.28007	3.35842	3.30878	3.37223	3.31778	3.40791	3.15966	3.22135	3.26094
fu2	0.192817	0.0466667	24	0	0.0436333	2.90247	2.89581	2.82986	2.86453	2.84387	2.79516	2.77108	2.83495	2.92565	2.83337	2.86909
Bap170	0.192817	0.0466667	18	3	0.0436413	2.92587	3.0075	2.96296	2.93069	2.91084	2.89966	2.79429	2.89009	2.95864	3.0362	2.94137
B52	0.0515997	0.0019697	18	3	0.0436625	5.69844	5.74555	5.67768	5.67927	5.71836	5.64665	5.58662	5.67263	5.77334	5.7591	5.74303
Kr-h1	0.149386	0.0243939	18	12	0.043667	4.05555	4.15083	4.10729	4.21351	4.10172	4.1565	4.29811	4.16626	4.06538	4.01864	3.98152
CG17118	0.0763085	0.00515152	24	0	0.043723	1.28795	1.33455	1.22661	1.25373	1.24999	1.17084	1.20095	1.21828	1.22106	1.28575	1.27675
CG6673	0.0515997	0.0019697	18	12	0.0437469	6.08148	6.01474	6.09653	6.04988	6.05188	6.12591	6.1396	6.09698	5.93568	5.93884	5.98766
CG13005	0.108914	0.0118182	24	3	0.043813	2.22204	2.2476	2.20521	2.20375	2.18183	2.10233	2.11752	2.12204	2.15443	2.21189	2.20265
deltaCOP	0.192817	0.0466667	24	0	0.0438708	5.95729	6.03057	5.94539	5.98396	5.92439	5.86669	5.87707	5.86155	5.93196	6.00076	5.93018
Cp110	0.192817	0.0466667	18	3	0.0439113	2.47042	2.46778	2.46735	2.46579	2.40668	2.46575	2.26152	2.35761	2.41178	2.51198	2.48747
CG3652	0.192817	0.0466667	24	21	0.0439246	4.80606	4.71313	4.67074	4.75616	4.68988	4.70083	4.76473	4.76624	4.78329	4.80128	4.8276
Arp14D	0.192817	0.0466667	24	15	0.0441527	4.59439	4.6124	4.61729	4.66379	4.66978	4.71249	4.73008	4.65719	4.67449	4.69259	4.7141
pwn	0.149386	0.0243939	18	6	0.044153	1.37605	1.39838	1.40303	1.41262	1.42929	1.33961	1.33205	1.34351	1.4153	1.47001	1.39916
Etl1	0.192817	0.0466667	18	6	0.044176	3.64889	3.66778	3.71132	3.66397	3.7114	3.63015	3.55585	3.64068	3.6988	3.65408	3.79843
CG6406	0.192817	0.0466667	18	3	0.0442115	3.45577	3.43322	3.46765	3.49475	3.44194	3.39409	3.34209	3.40883	3.50049	3.48529	3.51092
lms	0.149386	0.0243939	24	3	0.0442135	1.96245	1.9731	1.89879	1.89998	1.90708	1.84571	1.87301	1.853	1.88446	1.90097	1.81931
FLASH	0.108914	0.0118182	24	0	0.0442501	2.38112	2.40014	2.36202	2.33466	2.37947	2.26974	2.28133	2.21059	2.37029	2.34298	2.37742
SCAR	0.192817	0.0466667	18	6	0.0442692	4.75605	4.72801	4.78743	4.77893	4.87763	4.72427	4.68783	4.71797	4.79904	4.74685	4.88039
CG14717	0.108914	0.0118182	24	0	0.0444801	1.19368	1.11956	1.06642	1.07523	1.09398	1.04456	1.01933	1.06811	1.07887	1.2459	1.10436
CG5261	0.192817	0.0466667	18	15	0.0444967	7.52487	7.50688	7.435	7.54279	7.42494	7.5613	7.56063	7.54234	7.4925	7.4911	7.46115
Rcd5	0.192817	0.0466667	18	0	0.0445081	4.94755	4.97805	4.88197	4.82113	4.8742	4.93782	4.86952	4.88588	4.99631	4.90953	4.91435
CG7139	0.108914	0.0118182	24	0	0.0446134	4.16333	4.20737	4.08855	4.12395	4.12791	4.0767	3.9958	4.05845	4.09687	4.13976	4.12158
nesd	0.192817	0.0466667	24	0	0.0446281	1.47526	1.56169	1.40062	1.42864	1.37183	1.41042	1.37259	1.36852	1.41054	1.48354	1.41698
CG17721	0.149386	0.0243939	24	15	0.0446771	3.54022	3.43988	3.4284	3.54347	3.48457	3.58445	3.57096	3.5736	3.57765	3.55993	3.56428
ABCB7	0.192817	0.0466667	24	3	0.044684	5.40532	5.46159	5.40202	5.43098	5.35746	5.29274	5.35309	5.29667	5.39234	5.40708	5.33962
bou	0.192817	0.0466667	24	21	0.0447272	4.81742	4.74096	4.7292	4.68504	4.70433	4.72362	4.75169	4.75004	4.77781	4.79034	4.80816
CG6333	0.149386	0.0243939	24	3	0.044761	1.50323	1.4902	1.46714	1.4479	1.41959	1.36379	1.43013	1.39378	1.40703	1.4115	1.38436
CG9723	0.108914	0.0118182	18	0	0.0447946	3.29736	3.32933	3.23914	3.24508	3.17596	3.24534	3.24457	3.20851	3.31257	3.29716	3.2777
FANCI	0.108914	0.0118182	24	0	0.0448045	1.97273	1.93082	1.89608	1.89693	1.9245	1.82777	1.77262	1.8948	1.96001	1.89665	1.9067
CG9911	0.192817	0.0466667	18	6	0.0448093	5.91987	5.95113	5.95242	5.95517	5.96226	5.83248	5.90187	5.82149	5.8487	5.91605	5.93484
Miro	0.0515997	0.0019697	18	6	0.0448145	4.98954	5.00318	5.04796	5.06085	5.04213	5.02338	4.93484	4.9681	5.04028	5.03873	5.02963
Ncc69	0.149386	0.0243939	24	3	0.0448827	5.30861	5.33966	5.32049	5.24617	5.254	5.24554	5.11569	5.21633	5.2541	5.24889	5.24874
Taspase1	0.192817	0.0466667	24	15	0.0449679	2.54013	2.46579	2.55154	2.5545	2.50045	2.6381	2.55622	2.58655	2.5764	2.61335	2.58983
CG13843	0.149386	0.0243939	24	3	0.0450471	1.34961	1.29456	1.28829	1.30592	1.28354	1.18223	1.2375	1.23394	1.27877	1.28962	1.18903
Rtnl1	0.0763085	0.00515152	24	9	0.0451365	6.60205	6.57536	6.62138	6.63202	6.69508	6.61284	6.6066	6.54863	6.50202	6.43814	6.56808
CG2991	0.0515997	0.0019697	18	12	0.0451759	5.40473	5.43458	5.42368	5.43331	5.47276	5.5015	5.50037	5.47803	5.36437	5.30363	5.33618
CG43394	0.149386	0.0243939	18	6	0.045212	3.67995	3.69941	3.72703	3.72771	3.73143	3.64899	3.6566	3.6636	3.74138	3.71187	3.7286
CG43163	0.149386	0.0243939	24	0	0.0452202	1.94677	1.97156	1.92962	1.95055	1.87766	1.83872	1.78165	1.86825	1.93552	1.92454	1.93077
CG6654	0.0515997	0.0019697	18	3	0.0453489	2.98806	3.00304	2.99244	2.98156	2.92297	2.94909	2.86871	2.91845	3.05038	3.0337	3.01024
l(2)35Df	0.0194852	0.000151515	18	3	0.0453698	2.8931	2.90213	2.86254	2.86972	2.83125	2.82044	2.81056	2.79965	2.90297	2.9276	2.91404
dpa	0.149386	0.0243939	18	0	0.0453824	2.04994	2.10511	1.96531	2.02538	1.9428	2.03514	1.99821	2.02369	2.02886	2.06614	2.07253
EF-G2	0.192817	0.0466667	24	3	0.0454941	3.12472	3.12053	3.08069	3.06928	3.0777	3.05907	2.90164	2.97058	3.06611	3.01032	3.13582
MED17	0.149386	0.0243939	18	3	0.0455398	3.25454	3.27798	3.19558	3.2409	3.29731	3.19135	3.17528	3.2062	3.25812	3.32508	3.31159
ome	0.149386	0.0243939	24	6	0.0455636	4.53777	4.51505	4.56102	4.52752	4.62969	4.49639	4.48228	4.55782	4.46245	4.38869	4.4869
Hel25E	0.0515997	0.0019697	18	6	0.0455685	5.33367	5.37858	5.38966	5.41103	5.4224	5.30289	5.3689	5.32736	5.38803	5.39687	5.38026
CG4210	0.108914	0.0118182	18	12	0.0456257	4.2709	4.24308	4.28087	4.34822	4.33499	4.30086	4.47205	4.35929	4.08008	4.24878	4.26691
CG3632	0.192817	0.0466667	24	3	0.0456724	4.84102	4.89446	4.88427	4.84016	4.89662	4.81403	4.69287	4.78695	4.83191	4.78619	4.84061
CG13322	0.149386	0.0243939	18	3	0.0456975	3.11072	3.08733	3.07724	3.13752	3.11749	2.99319	3.05525	3.04371	3.12439	3.16686	3.19167
CG9203	0.0763085	0.00515152	18	0	0.045707	2.00805	1.99148	1.88916	1.88478	1.92537	1.9283	1.88196	1.94574	1.98436	1.97803	1.99064
Taz	0.192817	0.0466667	18	12	0.0458284	5.12837	5.11726	5.12122	5.16844	5.11319	5.2074	5.21888	5.15841	5.11661	5.11614	5.06577
Top3alpha	0.0763085	0.00515152	24	3	0.0458329	2.59601	2.62028	2.49565	2.52956	2.49798	2.47984	2.43788	2.44345	2.4957	2.46774	2.47701
JTBR	0.0194852	0.000151515	24	3	0.0458336	4.82816	4.81332	4.8037	4.78675	4.79738	4.73389	4.71557	4.63149	4.74718	4.77619	4.7777
APP-BP1	0.149386	0.0243939	18	3	0.0458757	3.81059	3.85068	3.84607	3.80462	3.81668	3.75295	3.77175	3.71752	3.85331	3.81112	3.86594
raptor	0.192817	0.0466667	24	0	0.0459331	3.22567	3.33084	3.21351	3.20769	3.18713	3.15444	3.02813	3.1824	3.24254	3.26874	3.18216
fz4	0.108914	0.0118182	18	6	0.0459519	2.74148	2.71411	2.75224	2.75683	2.7902	2.7033	2.63873	2.68039	2.76745	2.77485	2.74387
CG8368	0.108914	0.0118182	18	6	0.0460079	3.44202	3.38178	3.50713	3.47165	3.44551	3.41607	3.40664	3.35231	3.43222	3.44365	3.45259
Gp150	0.0763085	0.00515152	18	6	0.0460509	7.83051	7.87065	7.88354	7.91252	7.88665	7.81763	7.77828	7.82884	7.87483	7.83603	7.90892
CG7326	0.192817	0.0466667	18	6	0.0461257	2.49374	2.51412	2.53178	2.55209	2.57142	2.43696	2.47371	2.47069	2.50817	2.46692	2.4983
Mst85C	0.149386	0.0243939	24	0	0.0461311	4.20875	4.16638	4.15501	4.12592	4.17439	4.0289	4.0945	4.02212	4.16273	4.14215	4.17921
Irk2	0.149386	0.0243939	24	15	0.0462407	5.96476	5.95454	5.93338	5.94024	5.98562	6.0755	6.0865	6.03763	5.99549	5.98641	5.97539
CG11771	0.108914	0.0118182	24	3	0.0462439	6.32144	6.3657	6.34477	6.28839	6.28103	6.26565	6.20428	6.22518	6.27718	6.3115	6.24663
blot	0.192817	0.0466667	24	15	0.0462942	3.19185	3.2463	3.27879	3.31403	3.2992	3.30796	3.37847	3.38054	3.3093	3.33367	3.30988
CG2025	0.149386	0.0243939	24	3	0.0463342	3.4056	3.4546	3.374	3.35864	3.41139	3.30666	3.27076	3.32889	3.3402	3.3932	3.3948
ns2	0.192817	0.0466667	24	12	0.0464059	4.66608	4.66683	4.74763	4.71809	4.7257	4.71393	4.75264	4.74203	4.69346	4.64567	4.66986
CG12985	0.108914	0.0118182	18	3	0.0465021	1.47556	1.51307	1.40932	1.47075	1.45634	1.40065	1.42666	1.34632	1.46981	1.51838	1.53264
RpL34a	0.192817	0.0466667	18	15	0.046624	7.81212	7.83903	7.78689	7.76521	7.7776	7.83388	7.91751	7.85051	7.80581	7.85197	7.78364
fs(1)K10	0.192817	0.0466667	24	3	0.0467124	3.39659	3.45941	3.44868	3.37861	3.47734	3.35149	3.26424	3.34034	3.4316	3.39421	3.37545
CG8735	0.0515997	0.0019697	24	18	0.046719	4.75485	4.75709	4.71085	4.74268	4.7639	4.81657	4.817	4.77445	4.8174	4.82963	4.83393
hppy	0.192817	0.0466667	18	3	0.0467419	4.18645	4.23428	4.23083	4.22116	4.26306	4.15958	4.08152	4.17678	4.23816	4.23809	4.29292
Eip63F-1	0.149386	0.0243939	18	12	0.046816	5.66289	5.47524	5.65617	5.59501	5.73297	5.69516	5.74674	5.65954	5.45494	5.35918	5.45614
Vha16-1	0.0515997	0.0019697	18	12	0.0468694	8.76242	8.73387	8.7452	8.74459	8.79663	8.8068	8.81561	8.83327	8.69765	8.66048	8.7023
CG7692	0.108914	0.0118182	24	0	0.0469036	3.02002	3.04705	3.0349	2.98934	2.98338	2.79816	2.76754	2.82634	2.99459	2.99885	2.99635
lkb1	0.149386	0.0243939	24	0	0.0469956	3.67848	3.74475	3.65027	3.70636	3.6239	3.63459	3.59199	3.58805	3.66538	3.71949	3.6645
Lgr1	0.192817	0.0466667	18	3	0.0470079	2.97003	3.09636	3.05426	3.08638	3.105	3.02284	2.87669	3.04266	3.34819	3.12848	3.23874
Mo25	0.108914	0.0118182	24	3	0.0470343	5.99969	6.04935	6.01091	6.04704	5.98992	5.96805	5.92658	5.92859	5.98712	5.94569	5.95963
esn	0.192817	0.0466667	24	3	0.0470469	2.02751	2.08104	2.0017	2.06817	2.03538	1.98164	1.96879	1.9528	1.97292	2.00272	1.96076
wibg	0.0355378	0.000606061	24	0	0.0470577	3.30532	3.35989	3.25272	3.26117	3.26804	3.21245	3.19537	3.21625	3.27102	3.31617	3.2821
CG11660	0.149386	0.0243939	24	3	0.0471756	3.26452	3.23012	3.16864	3.22839	3.27196	3.07916	3.16351	3.14604	3.1874	3.1835	3.20409
CG12042	0.0515997	0.0019697	24	0	0.0472011	4.13973	4.08261	4.03072	4.05409	4.0597	4.05146	3.98958	3.99314	4.11498	4.06214	4.07568
CG13907	0.108914	0.0118182	24	12	0.0472382	4.96404	4.92492	4.99893	4.98342	5.04554	5.20244	5.0067	5.10831	5.02846	4.98289	4.97662
CG34408	0.149386	0.0243939	24	0	0.047306	4.54503	4.5772	4.47591	4.49652	4.47151	4.49451	4.37761	4.48052	4.56309	4.53875	4.49846
CG7600	0.149386	0.0243939	24	0	0.047325	4.18923	4.26375	4.1713	4.2359	4.16885	4.11178	4.10347	4.0901	4.17745	4.21355	4.17913
CG14764	0.108914	0.0118182	24	12	0.0473506	4.37474	4.32046	4.42236	4.44385	4.45021	4.50599	4.47424	4.45223	4.40815	4.37702	4.47397
Nmnat	0.192817	0.0466667	18	6	0.0473668	4.3623	4.34134	4.36548	4.38667	4.44884	4.31462	4.32473	4.25655	4.37596	4.39929	4.45029
dpr3	0.192817	0.0466667	18	6	0.0473864	2.25763	2.258	2.31975	2.32483	2.31716	2.21094	2.22044	2.26034	2.31753	2.26763	2.45226
CG8728	0.149386	0.0243939	24	0	0.0474095	4.78379	4.83074	4.73935	4.75864	4.65863	4.72598	4.73519	4.67959	4.73992	4.78684	4.78228
Cul-5	0.149386	0.0243939	18	3	0.0475666	3.37304	3.37145	3.37681	3.41787	3.34508	3.34151	3.2869	3.29498	3.45706	3.3841	3.48244
ArfGAP3	0.108914	0.0118182	24	3	0.0475829	4.69577	4.75024	4.66109	4.73512	4.66906	4.50461	4.60456	4.63081	4.64251	4.72576	4.65691
CG3542	0.108914	0.0118182	24	0	0.0475953	3.28853	3.30883	3.25615	3.27348	3.27234	3.17069	3.14419	3.17631	3.24842	3.27859	3.29138
CG11790	0.149386	0.0243939	18	6	0.0476287	5.77949	5.83071	5.86178	5.87823	5.84389	5.77578	5.82029	5.75415	5.7868	5.86042	5.85155
muskelin	0.192817	0.0466667	18	6	0.0476381	3.56899	3.58722	3.59118	3.62192	3.62086	3.52545	3.4663	3.55185	3.57169	3.55488	3.62596
Sec61alpha	0.149386	0.0243939	24	15	0.047643	6.50927	6.52074	6.54345	6.5825	6.54229	6.5909	6.65136	6.59691	6.5769	6.65575	6.56797
D2R	0.192817	0.0466667	18	3	0.0476746	1.71024	1.68271	1.67902	1.67066	1.74872	1.65163	1.60896	1.61792	1.69528	1.69423	1.7985
lin-28	0.108914	0.0118182	24	0	0.0477132	1.65313	1.68092	1.61167	1.64314	1.63207	1.53852	1.51296	1.56972	1.66427	1.63686	1.63126
CCKLR-17D1	0.192817	0.0466667	18	6	0.0477497	1.48632	1.50761	1.5945	1.54397	1.49467	1.45266	1.40786	1.48384	1.53185	1.46628	1.54236
cactin	0.0763085	0.00515152	24	3	0.0477516	3.66424	3.71973	3.70337	3.64896	3.66083	3.6191	3.57547	3.59319	3.61957	3.65541	3.59885
trus	0.108914	0.0118182	18	3	0.0478431	3.43134	3.4186	3.37897	3.41517	3.31808	3.31521	3.38131	3.28237	3.42853	3.42744	3.50568
TwdlG	0.192817	0.0466667	24	0	0.0478891	3.77469	3.73692	3.69316	3.65459	3.78844	3.64116	3.58977	3.52997	3.69329	3.6577	3.70867
p	0.149386	0.0243939	18	3	0.0479027	4.41434	4.42114	4.43825	4.39951	4.46506	4.35289	4.37988	4.30149	4.49654	4.50021	4.45961
Pink1	0.149386	0.0243939	24	3	0.0479226	7.72592	7.71143	7.68022	7.67115	7.65624	7.65125	7.54857	7.6032	7.67046	7.67727	7.55521
CG6230	0.149386	0.0243939	24	0	0.0479446	4.05683	4.03642	3.98993	4.03969	3.97795	3.90576	3.84877	3.93472	3.9821	4.01387	4.00551
CG9143	0.192817	0.0466667	18	15	0.0479766	2.87669	2.90553	2.78715	2.78105	2.79966	2.85557	2.82828	2.84106	2.82659	2.82393	2.80657
Hpr1	0.108914	0.0118182	24	0	0.0479874	3.77951	3.81985	3.76518	3.75891	3.70285	3.63149	3.69503	3.66239	3.74008	3.73949	3.76518
A16	0.192817	0.0466667	24	15	0.0480032	3.85007	3.83411	3.92586	3.90789	3.83806	3.96658	3.91972	3.98725	3.93576	3.90151	3.94558
Pka-R1	0.192817	0.0466667	24	12	0.0480043	5.06891	5.03851	5.1077	5.09029	5.13288	5.16481	5.07575	5.17704	5.07522	4.95349	5.07748
JhI-1	0.192817	0.0466667	24	3	0.0480116	3.53093	3.58441	3.54293	3.51547	3.56229	3.50278	3.45829	3.44896	3.47597	3.45901	3.53579
CG42358	0.108914	0.0118182	18	15	0.0480207	2.94204	2.93529	2.92061	2.90845	2.86609	2.98644	3.0476	2.96629	2.90525	2.93387	2.95477
rols	0.192817	0.0466667	18	3	0.0480854	2.50583	2.64516	2.54816	2.62234	2.58716	2.55311	2.45607	2.54012	2.6598	2.68712	2.68717
PTP-ER	0.192817	0.0466667	24	3	0.0481118	4.25678	4.23383	4.26644	4.18573	4.21836	4.16311	4.00366	4.1202	4.21838	4.18734	4.19014
asl	0.149386	0.0243939	24	3	0.048142	1.7988	1.80564	1.74137	1.76204	1.77288	1.6931	1.69798	1.67367	1.71449	1.80657	1.73034
D	0.192817	0.0466667	18	12	0.0482137	2.00417	2.06882	1.98347	2.07272	1.99453	2.10398	2.17299	2.02967	1.8658	1.86633	1.97409
Nhe1	0.108914	0.0118182	18	9	0.048286	4.25631	4.26397	4.36078	4.39293	4.41847	4.32346	4.3244	4.30999	4.29141	4.31153	4.33978
AdoR	0.149386	0.0243939	18	3	0.0483148	2.01226	2.03185	2.02689	2.07344	2.04952	1.94381	1.95869	2.00283	2.17553	2.27597	2.13443
Mcm7	0.192817	0.0466667	18	3	0.048353	1.59763	1.6386	1.5761	1.57379	1.59057	1.50532	1.52935	1.53216	1.60714	1.70249	1.55875
CG6184	0.0355378	0.000606061	18	3	0.0483609	2.8339	2.83531	2.82194	2.76817	2.80712	2.79615	2.72291	2.69318	2.84699	2.87364	2.95816
CG8195	0.192817	0.0466667	18	6	0.0483651	3.70301	3.69713	3.73936	3.71816	3.83135	3.66637	3.64657	3.65296	3.73784	3.68722	3.867
agt	0.149386	0.0243939	24	3	0.0483827	3.90617	3.97145	3.85451	3.90246	3.88366	3.79474	3.83337	3.70057	3.83471	3.84812	3.98643
CG11448	0.192817	0.0466667	24	3	0.0483941	5.19197	5.25338	5.18875	5.18108	5.19883	5.11018	5.03987	5.07348	5.1874	5.16902	5.23975
CG16940	0.149386	0.0243939	24	3	0.0484058	4.26972	4.2062	4.22278	4.17216	4.20151	4.13536	4.00822	4.08286	4.19726	4.17069	4.21506
snoRNA:Psi28S-1192a	0.108914	0.0118182	18	3	0.0484133	1.35975	1.43946	1.39567	1.32437	1.32892	1.27124	1.26319	1.33986	1.4709	1.46018	1.43244
tomboy40	0.192817	0.0466667	18	3	0.0484341	1.28082	1.17162	1.15154	1.21868	1.19218	1.1422	1.0866	1.14204	1.21457	1.34137	1.21608
shark	0.149386	0.0243939	24	0	0.0484741	3.29198	3.3572	3.29127	3.26448	3.26034	3.17362	3.14692	3.22081	3.31193	3.27112	3.24966
CG3238	0.192817	0.0466667	24	3	0.0485501	1.59537	1.64664	1.60703	1.62585	1.57576	1.47707	1.47864	1.51352	1.60992	1.57901	1.56428
CG10495	0.108914	0.0118182	18	0	0.0486976	2.54553	2.55931	2.42774	2.42232	2.48317	2.42605	2.4645	2.42851	2.49639	2.53048	2.54036
Eaf6	0.192817	0.0466667	18	3	0.0487323	4.33847	4.23253	4.27038	4.20075	4.28563	4.18896	4.25008	4.15285	4.30526	4.29477	4.35185
CG2976	0.192817	0.0466667	18	15	0.0487673	5.50091	5.53638	5.47268	5.47599	5.47949	5.54833	5.6255	5.54778	5.5352	5.65504	5.48224
sws	0.149386	0.0243939	24	15	0.0487695	5.10568	5.13734	5.11256	5.11761	5.11596	5.27778	5.15548	5.2319	5.18576	5.15989	5.15248
hop	0.0194852	0.000151515	24	3	0.0488111	3.56162	3.58366	3.51706	3.52303	3.55275	3.4196	3.28404	3.48133	3.51574	3.51544	3.49996
CG5823	0.149386	0.0243939	18	6	0.048837	5.02368	5.03753	5.05287	5.0719	5.0792	4.97919	4.99447	4.96109	5.04879	5.01464	5.10749
Src64B	0.192817	0.0466667	18	3	0.0488475	2.73627	2.6293	2.73374	2.72673	2.8283	2.66402	2.60078	2.68599	3.0588	2.93472	3.03633
fu	0.108914	0.0118182	24	0	0.0490376	2.58132	2.54507	2.49113	2.49924	2.46555	2.50576	2.45109	2.46032	2.53173	2.55358	2.53509
pea	0.192817	0.0466667	24	3	0.04905	3.00637	3.00744	3.01205	2.96258	2.95382	2.88853	2.8582	2.84029	2.96978	2.94738	2.96314
CG14229	0.108914	0.0118182	24	0	0.0490666	3.55803	3.54735	3.47547	3.36616	3.45752	3.43159	3.45262	3.45715	3.51953	3.47501	3.48014
CG10646	0.0515997	0.0019697	18	3	0.0491015	3.1081	3.04041	3.01626	2.96298	3.03573	2.93483	3.00734	2.9242	3.07023	3.11116	3.11961
CG8207	0.108914	0.0118182	18	0	0.0491044	3.93261	3.91037	3.8178	3.84738	3.80299	3.83373	3.90887	3.84812	3.8517	3.87944	3.87177
CG17922	0.192817	0.0466667	18	3	0.049119	2.66035	2.69961	2.71147	2.70278	2.73656	2.63985	2.61045	2.63901	2.78936	2.74361	2.87792
CG4747	0.192817	0.0466667	18	6	0.0491434	5.21303	5.21506	5.25126	5.27641	5.28969	5.243	5.15237	5.17565	5.21334	5.22454	5.27463
CG12004	0.0763085	0.00515152	24	12	0.0493551	5.05595	5.0524	5.1002	5.12269	5.16789	5.20331	5.19063	5.14531	5.09837	5.1185	5.11006
CG5969	0.108914	0.0118182	24	15	0.0493581	3.54725	3.54759	3.55412	3.5985	3.54424	3.65575	3.62933	3.67269	3.56433	3.61722	3.5802
Nf-YC	0.149386	0.0243939	24	0	0.0493752	3.09743	3.11723	3.01457	3.03325	3.07075	3.06497	2.98227	3.00148	3.09005	3.1056	3.0535
CG18754	0.192817	0.0466667	24	6	0.0493958	1.43567	1.37559	1.49046	1.44273	1.42415	1.33546	1.39162	1.36354	1.33157	1.35954	1.38479
5-HT1A	0.149386	0.0243939	18	3	0.0494039	1.8978	1.90286	1.8815	1.84279	1.95906	1.81749	1.84462	1.80846	1.95411	1.91655	2.05653
Ice1	0.192817	0.0466667	24	0	0.0494761	2.09798	2.1169	2.03119	2.11625	2.06821	1.94966	1.93976	2.00869	2.06051	2.13377	2.07224
CG14814	0.0763085	0.00515152	24	0	0.0495223	1.80461	1.88767	1.78251	1.76465	1.75834	1.75544	1.69103	1.74931	1.7774	1.83686	1.83252
CG14718	0.192817	0.0466667	24	0	0.0495292	1.38728	1.11872	1.09019	1.10859	1.12531	1.02214	1.06053	1.05496	1.10235	1.55441	1.10916
CCKLR-17D3	0.192817	0.0466667	24	0	0.0495328	1.47607	1.45683	1.40632	1.40212	1.40494	1.33882	1.38056	1.41477	1.4322	1.46016	1.51904
CG9706	0.149386	0.0243939	24	3	0.0495364	4.06215	4.03143	3.96891	4.02519	4.00717	3.88729	3.94773	3.89715	3.95593	4.002	4.05181
CG6084	0.108914	0.0118182	24	15	0.0495435	8.33828	8.34863	8.42389	8.37677	8.40043	8.45278	8.57687	8.52435	8.4036	8.39452	8.41261
RAF2	0.192817	0.0466667	24	0	0.04955	2.89995	2.9699	2.90037	2.86116	2.91601	2.80509	2.70238	2.82858	2.92742	2.89488	2.91773
Spt5	0.108914	0.0118182	18	6	0.0495797	4.91584	4.92877	4.97069	4.94683	4.94404	4.89047	4.7685	4.83759	4.92849	4.92485	4.95881
RpLP0-like	0.192817	0.0466667	24	12	0.049592	4.7182	4.70206	4.78256	4.72266	4.7328	4.79418	4.90838	4.82876	4.68101	4.7483	4.74507
l(3)72Ab	0.192817	0.0466667	24	3	0.0496105	4.41158	4.50547	4.47321	4.42891	4.47926	4.38205	4.23541	4.39468	4.45463	4.39972	4.39287
CG14614	0.108914	0.0118182	18	6	0.0496745	4.02435	4.02948	4.08058	4.08464	4.1496	4.00527	4.00922	4.01539	4.08575	4.04448	4.12213
fws	0.108914	0.0118182	24	0	0.0496884	4.35432	4.3871	4.31555	4.29477	4.33283	4.23983	4.20704	4.22831	4.29282	4.33467	4.33008
CG7339	0.149386	0.0243939	24	21	0.0497108	3.31765	3.2997	3.22137	3.24763	3.22912	3.24689	3.29474	3.24055	3.32468	3.2853	3.32388
gho	0.0515997	0.0019697	24	3	0.0497311	4.97722	5.06924	5.00085	4.95823	4.97619	4.87985	4.79833	4.9474	4.95756	4.95362	4.91832
escl	0.0355378	0.000606061	24	0	0.049747	2.39389	2.45852	2.31159	2.36033	2.34153	2.33501	2.2932	2.22293	2.378	2.38304	2.38085
wrapper	0.192817	0.0466667	18	3	0.0497655	4.1933	4.22554	4.20499	4.22875	4.28085	4.15035	4.17653	4.09779	4.2449	4.31361	4.34327
Hex-A	0.0763085	0.00515152	24	9	0.0498403	6.8964	6.84671	6.9147	6.95067	6.94868	6.94564	6.8951	6.8965	6.8555	6.84649	6.82499
beat-Va	0.192817	0.0466667	18	6	0.04986	1.6649	1.64607	1.70119	1.67882	1.79105	1.62196	1.5965	1.6272	1.72001	1.65465	1.84407
CG7180	0.192817	0.0466667	24	6	0.0498666	5.25671	5.22709	5.38024	5.27071	5.33799	5.21259	5.20882	5.14264	5.23476	5.19369	5.20669
Aats-pro	0.149386	0.0243939	18	3	0.0499215	3.66423	3.64621	3.65794	3.5809	3.68426	3.57784	3.60725	3.56743	3.71768	3.71746	3.67339
CG17650	0.108914	0.0118182	24	21	0.0499425	1.663	1.66753	1.58268	1.62144	1.61313	1.64611	1.6616	1.66683	1.66271	1.79313	1.81681
CG14341	0.192817	0.0466667	24	0	0.0499728	4.29181	4.22261	4.19104	4.21732	4.13854	4.13199	4.15745	4.11476	4.14049	4.21513	4.25427
Nc	0.192817	0.0466667	24	18	0.049976	2.60709	2.65579	2.62661	2.64134	2.6313	2.69126	2.72469	2.64439	2.6614	2.82053	2.72714
LamC	0.0763085	0.00515152	18	12	0.0500207	5.25861	5.29155	5.21283	5.32609	5.27093	5.34092	5.33162	5.34657	5.10882	5.0954	5.02927
CG9801	0.192817	0.0466667	24	6	0.0500868	3.26357	3.24752	3.39441	3.3747	3.31274	3.24257	3.2439	3.24999	3.20735	3.20954	3.2878
Ntf-2	0.149386	0.0243939	24	3	0.0501145	5.09031	5.16659	5.19012	5.08123	5.14931	5.02733	5.05512	5.02696	5.07868	5.09807	5.06799
CG2938	0.0515997	0.0019697	24	3	0.0501232	3.88002	3.9195	3.86345	3.83867	3.86569	3.80042	3.73016	3.76221	3.83958	3.80095	3.85796
Prp19	0.108914	0.0118182	24	0	0.0501419	4.30213	4.34234	4.26792	4.20762	4.2489	4.24059	4.23039	4.22622	4.28093	4.3406	4.27205
prel	0.0763085	0.00515152	18	6	0.0501564	6.21984	6.19897	6.23545	6.32237	6.26258	6.19821	6.17528	6.13671	6.20985	6.24684	6.25
CG3776	0.192817	0.0466667	24	9	0.0501593	6.18442	6.13326	6.2023	6.20743	6.19317	6.13251	6.20837	6.13668	6.10555	6.10318	6.10336
CG1575	0.149386	0.0243939	18	15	0.0501969	2.89945	2.92025	2.83311	2.88251	2.86559	2.9666	2.9533	2.94074	2.80719	2.89892	2.84978
CG12384	0.192817	0.0466667	24	18	0.0502067	6.32167	6.3165	6.24867	6.31896	6.2782	6.31794	6.39863	6.35639	6.36898	6.47325	6.33615
CG4714	0.0763085	0.00515152	18	6	0.0502086	1.15837	1.19223	1.21383	1.19631	1.23685	1.12493	1.14123	1.11568	1.18176	1.18536	1.16909
CG42390	0.192817	0.0466667	24	3	0.0502529	6.86305	6.90091	6.83537	6.8825	6.79719	6.82302	6.69293	6.77985	6.82668	6.76935	6.79202
CG13532	0.192817	0.0466667	18	3	0.0502626	2.30868	2.26654	2.29984	2.2592	2.287	2.1724	2.2261	2.21857	2.31859	2.26396	2.48435
BtbVII	0.149386	0.0243939	24	0	0.0503528	4.49227	4.56028	4.49213	4.48615	4.48767	4.39901	4.23951	4.37098	4.51796	4.49817	4.44072
CG17075	0.149386	0.0243939	18	6	0.0503681	1.97301	1.95375	2.0204	1.97901	2.0247	1.92639	1.82737	1.94889	1.98887	1.96836	2.04852
tkv	0.192817	0.0466667	18	3	0.0504126	4.74229	4.81073	4.77366	4.75144	4.78513	4.69987	4.67931	4.71467	4.80533	4.8094	4.80774
Not1	0.192817	0.0466667	18	6	0.0505117	5.48882	5.53317	5.53643	5.49982	5.60955	5.4562	5.27114	5.46995	5.57876	5.49667	5.54761
CG8617	0.192817	0.0466667	24	0	0.0507592	3.46034	3.49446	3.43272	3.43235	3.38832	3.3843	3.44155	3.34465	3.47873	3.55111	3.45627
CG3309	0.0763085	0.00515152	24	0	0.0508412	2.76814	2.74992	2.68378	2.66873	2.68415	2.67025	2.57274	2.61379	2.69399	2.67323	2.72113
pyd	0.0515997	0.0019697	18	3	0.0508499	4.3061	4.37126	4.33785	4.29756	4.35998	4.26762	4.08037	4.27992	4.4499	4.41522	4.50286
CG7956	0.192817	0.0466667	18	6	0.0508849	3.90659	3.9418	4.00679	3.97157	3.97426	3.91407	3.7914	3.90028	3.9948	3.91932	3.99658
CG31673	0.149386	0.0243939	18	12	0.0509376	5.60359	5.58845	5.57062	5.58237	5.59994	5.63975	5.71167	5.68902	5.50365	5.56512	5.51913
CR43493	0.192817	0.0466667	18	6	0.0509649	1.41859	1.45427	1.52059	1.52982	1.49488	1.44975	1.43176	1.43959	1.52429	1.49256	1.4537
Sld5	0.192817	0.0466667	24	0	0.0510037	2.42936	2.29836	2.20311	2.21738	2.19444	2.17822	2.18543	2.17746	2.14235	2.24997	2.27918
rap	0.192817	0.0466667	24	15	0.0510056	3.93902	3.91113	3.91974	3.92198	3.95169	4.01059	4.02855	3.99619	3.95962	3.95088	4.03768
CG2698	0.108914	0.0118182	24	3	0.0510371	5.63935	5.66649	5.67354	5.66091	5.62764	5.57026	5.52286	5.54128	5.6379	5.59403	5.60977
ZnT63C	0.149386	0.0243939	18	12	0.0511049	4.86471	4.88936	4.88261	4.90435	4.85517	4.98265	4.97791	4.91948	4.85151	4.84035	4.88091
CG5274	0.192817	0.0466667	24	0	0.051109	3.29812	3.30015	3.3477	3.23494	3.22372	3.21596	3.20065	3.22283	3.2768	3.28867	3.38001
rod	0.0515997	0.0019697	24	3	0.051117	1.94349	1.95289	1.89662	1.91398	1.95461	1.821	1.84662	1.84792	1.87999	1.87484	1.88293
CG16972	0.108914	0.0118182	24	0	0.0511407	2.76513	2.75457	2.74799	2.70523	2.69299	2.6653	2.53581	2.67305	2.7378	2.8295	2.72157
CG7065	0.0763085	0.00515152	24	3	0.051275	3.14052	3.17053	3.16126	3.14262	3.15307	2.97048	2.8934	2.9701	3.12995	3.11629	3.12742
CG6729	0.108914	0.0118182	24	0	0.0513214	3.26624	3.35087	3.2301	3.24601	3.19074	3.19683	3.14011	3.13147	3.25544	3.26944	3.19696
CG32452	0.108914	0.0118182	24	0	0.0513249	2.58604	2.6315	2.51811	2.52694	2.58641	2.50792	2.4704	2.46078	2.56041	2.58545	2.56485
CG9312	0.149386	0.0243939	18	12	0.0514028	6.2736	6.30162	6.26263	6.29541	6.19708	6.34823	6.31682	6.39449	5.97759	6.04401	6.15065
CG11436	0.108914	0.0118182	18	6	0.051417	2.47442	2.46349	2.49483	2.53362	2.49877	2.4287	2.38468	2.38084	2.46734	2.4463	2.47027
GM130	0.149386	0.0243939	24	3	0.0514325	4.23823	4.2702	4.2639	4.21252	4.25567	4.14678	4.08155	4.11272	4.25024	4.20833	4.23813
CG6204	0.108914	0.0118182	24	3	0.0515843	3.65978	3.68134	3.58918	3.62379	3.62506	3.5529	3.53532	3.51488	3.57811	3.57369	3.66949
CG4849	0.149386	0.0243939	18	3	0.0517059	3.05174	3.14739	3.10261	3.02018	3.02834	2.98343	3.00625	2.98077	3.09271	3.16427	3.0876
TH1	0.149386	0.0243939	18	6	0.0517808	3.58361	3.58891	3.62702	3.60046	3.62939	3.54051	3.51179	3.519	3.61208	3.6046	3.66711
CG9589	0.149386	0.0243939	24	3	0.0518236	1.34983	1.32567	1.30771	1.29152	1.27014	1.25088	1.21827	1.1617	1.2765	1.29743	1.21259
CG8032	0.0763085	0.00515152	18	6	0.0518469	4.1108	4.15584	4.16984	4.17409	4.16615	4.06356	4.10066	4.06459	4.14168	4.15849	4.17273
Ilk	0.149386	0.0243939	24	3	0.0518557	6.29696	6.30057	6.28594	6.25798	6.26658	6.21039	6.19366	6.19197	6.26864	6.2362	6.17867
CG11857	0.108914	0.0118182	18	6	0.0518637	5.46659	5.50043	5.5233	5.57335	5.53591	5.33638	5.46236	5.45423	5.41742	5.50457	5.50565
REG	0.192817	0.0466667	18	6	0.0519046	6.28446	6.31475	6.36197	6.35173	6.34695	6.2644	6.29286	6.22969	6.27897	6.28724	6.32526
mfrn	0.192817	0.0466667	24	15	0.0519127	5.49622	5.48278	5.50894	5.51485	5.53521	5.64898	5.60331	5.63199	5.52591	5.57755	5.4765
Klc	0.192817	0.0466667	18	6	0.0519356	5.76106	5.73825	5.79253	5.76662	5.8333	5.71759	5.70735	5.68308	5.80257	5.75411	5.86203
Gap69C	0.192817	0.0466667	24	0	0.0519544	4.77475	4.80782	4.69199	4.79465	4.69488	4.64868	4.71462	4.6351	4.7466	4.76578	4.72779
CG42675	0.192817	0.0466667	24	3	0.0520673	4.2722	4.27319	4.23966	4.21992	4.22136	4.20722	4.17242	4.15512	4.14927	4.21351	4.099
CG16979	0.0515997	0.0019697	24	3	0.0521374	4.00967	3.90743	3.89905	3.92357	3.92015	3.81052	3.80725	3.83924	3.86193	3.87969	3.88901
NUCB1	0.108914	0.0118182	24	3	0.0521669	6.60177	6.63459	6.60106	6.62586	6.63179	6.50903	6.54649	6.53591	6.56979	6.57383	6.53404
CG5003	0.108914	0.0118182	24	0	0.0522459	4.03438	4.0977	4.0325	3.9656	4.00699	3.94758	3.8922	3.90888	4.04354	3.97424	4.01269
CG12006	0.149386	0.0243939	18	3	0.0522463	3.5881	3.64515	3.67574	3.67224	3.60762	3.5859	3.55662	3.54946	3.73701	3.70352	3.83405
Atx-1	0.149386	0.0243939	24	0	0.0522843	1.55163	1.57883	1.5059	1.56483	1.46745	1.35686	1.40251	1.42956	1.52321	1.51792	1.46974
CG4751	0.108914	0.0118182	18	3	0.0522974	3.06897	3.09804	3.08837	3.0766	3.03654	2.98992	2.89977	3.02917	3.13487	3.09925	3.08412
VhaSFD	0.149386	0.0243939	24	3	0.0523184	7.32636	7.37409	7.35949	7.3265	7.31146	7.267	7.21667	7.25603	7.28193	7.31448	7.24699
croc	0.149386	0.0243939	18	15	0.0523324	1.59882	1.65278	1.54497	1.58018	1.55552	1.6314	1.68005	1.5993	1.57941	1.54797	1.58068
pn	0.108914	0.0118182	24	18	0.0523441	4.21298	4.24696	4.25504	4.20306	4.20295	4.27707	4.25977	4.23167	4.38549	4.38324	4.31655
CG6553	0.192817	0.0466667	18	3	0.052373	3.60072	3.62188	3.53759	3.60651	3.46419	3.51679	3.51094	3.50544	3.61662	3.61485	3.7238
Axud1	0.108914	0.0118182	18	3	0.0523829	3.05901	3.13282	3.08006	3.08583	3.0751	3.00133	2.95695	3.05777	3.14993	3.1309	3.15415
CG14997	0.108914	0.0118182	18	15	0.052399	5.08254	5.07417	4.99068	5.00216	5.05211	5.07389	5.12832	5.11347	5.02757	5.06289	5.01668
Orct2	0.149386	0.0243939	24	15	0.0524292	2.42921	2.50296	2.45442	2.48366	2.46466	2.55523	2.52716	2.58105	2.5181	2.54429	2.5391
CG3605	0.108914	0.0118182	18	6	0.0524306	4.57246	4.56669	4.61773	4.58305	4.587	4.5058	4.50135	4.4954	4.56613	4.54736	4.57636
MAN1	0.149386	0.0243939	18	6	0.0525196	4.05595	4.08067	4.15528	4.14258	4.14741	4.09689	4.07716	4.06779	4.12219	4.10196	4.09674
CG4424	0.108914	0.0118182	24	3	0.0525404	2.20948	2.26312	2.20695	2.13826	2.19208	2.03799	2.08822	2.08071	2.18717	2.19819	2.14028
Sap-r	0.149386	0.0243939	24	18	0.0526458	8.58456	8.66051	8.65719	8.65598	8.65612	8.73038	8.70371	8.72977	8.75803	8.71964	8.77717
Elongin-B	0.0763085	0.00515152	24	15	0.0526485	6.19207	6.17643	6.18376	6.23329	6.21204	6.30187	6.37295	6.31263	6.22404	6.23329	6.24976
CG8813	0.192817	0.0466667	24	21	0.0526502	1.44101	1.09162	1.07187	1.03362	1.10009	1.08632	1.07454	1.08861	1.14833	1.59535	1.1399
beta'Cop	0.108914	0.0118182	24	0	0.0526854	5.00789	5.06327	4.97874	5.03355	4.94754	4.90538	4.94483	4.90982	4.99148	5.06073	4.98005
alpha-Est9	0.149386	0.0243939	24	0	0.0527172	5.37885	5.29824	5.2785	5.22425	5.30757	5.21917	5.20907	5.16443	5.31051	5.24503	5.28419
CG8237	0.0763085	0.00515152	24	0	0.0527921	3.99983	3.93654	3.88609	3.92761	3.86803	3.81821	3.85578	3.82341	3.89531	3.9466	3.90879
CG10262	0.149386	0.0243939	24	0	0.0528043	3.22254	3.15588	3.08423	3.09182	3.14339	3.00386	3.0931	3.05084	3.12615	3.1351	3.16586
CG8549	0.192817	0.0466667	24	9	0.0528054	4.94813	4.932	4.97816	4.99171	5.04584	4.95325	5.04959	4.89657	4.84054	4.88911	4.91903
CG14882	0.192817	0.0466667	18	15	0.0528232	2.3535	2.40695	2.32068	2.38075	2.36169	2.41283	2.47406	2.46584	2.39023	2.34468	2.38637
CAP-D2	0.0763085	0.00515152	24	0	0.0528601	1.64452	1.65475	1.56804	1.63075	1.58397	1.51017	1.51566	1.51312	1.62623	1.60908	1.5876
CG9992	0.192817	0.0466667	24	12	0.0528773	3.51915	3.44879	3.54089	3.57827	3.57504	3.63687	3.64998	3.60173	3.55948	3.4671	3.62624
CG6428	0.0515997	0.0019697	18	12	0.052898	3.6933	3.73403	3.72656	3.71251	3.75051	3.77105	3.80764	3.87482	3.66345	3.6761	3.65405
CG10795	0.192817	0.0466667	18	0	0.0529109	4.14019	4.07615	3.97416	3.945	3.95664	4.07069	4.04889	4.03198	4.00784	4.04815	4.05846
CG4709	0.0515997	0.0019697	24	0	0.0529268	3.1464	3.13334	3.03863	3.09267	3.04831	3.00014	3.0197	2.94614	3.09369	3.05305	3.07584
CG10702	0.0355378	0.000606061	24	3	0.0529554	2.80654	2.81511	2.75271	2.77506	2.77192	2.70748	2.64466	2.61672	2.75152	2.72476	2.75924
Mcm2	0.108914	0.0118182	24	3	0.0529869	1.74334	1.70665	1.64709	1.74183	1.6861	1.60797	1.62971	1.59713	1.63236	1.70003	1.65742
CG11866	0.0515997	0.0019697	18	3	0.0530168	3.90694	3.90824	3.89258	3.90434	3.91995	3.84562	3.75737	3.81545	3.99867	3.9508	4.00365
CG4674	0.192817	0.0466667	24	12	0.0530281	2.41554	2.50951	2.54664	2.47885	2.56436	2.611	2.5619	2.55569	2.52726	2.4745	2.47784
Gmer	0.192817	0.0466667	24	21	0.0530328	3.00829	2.98838	2.92075	2.97484	2.9066	2.92077	2.97927	2.88071	2.99606	3.04955	2.9921
CG4854	0.192817	0.0466667	24	0	0.0530401	2.01479	1.96026	1.9582	1.93858	1.97456	1.84891	1.88641	1.70702	1.98905	1.92507	2.00768
CG6015	0.192817	0.0466667	18	6	0.0532287	4.26554	4.28977	4.32238	4.34116	4.32834	4.2534	4.24408	4.24375	4.37578	4.3096	4.35334
CG32808	0.108914	0.0118182	24	0	0.0532792	1.57027	1.62914	1.45379	1.46662	1.45089	1.43897	1.46328	1.46301	1.51152	1.52618	1.5263
l(3)72Dr	0.0515997	0.0019697	24	9	0.0532947	2.82253	2.78796	2.84358	2.88287	2.89723	2.84496	2.81984	2.83139	2.76128	2.71172	2.77308
TM4SF	0.149386	0.0243939	18	3	0.0533089	3.69433	3.67647	3.66251	3.63838	3.66032	3.59258	3.60249	3.56158	3.69563	3.61482	3.82972
ebi	0.192817	0.0466667	18	3	0.0533533	3.97671	4.00029	4.00987	4.0294	4.01346	3.94242	3.89212	3.92697	4.0435	4.04452	4.04176
SMC2	0.108914	0.0118182	24	3	0.0533939	2.09687	2.16497	2.07767	2.04114	2.07674	1.98466	1.97459	1.95085	2.03311	2.03887	2.10333
CG4119	0.0763085	0.00515152	24	0	0.0534316	3.6047	3.66877	3.59099	3.60336	3.58356	3.53302	3.50241	3.54147	3.63385	3.6432	3.6288
5-HT7	0.108914	0.0118182	24	3	0.0534483	2.01493	2.05564	1.9919	1.93994	2.05401	1.92305	1.84888	1.93918	1.94326	1.93514	1.95801
CG8116	0.149386	0.0243939	18	9	0.0534687	3.77462	3.69244	3.92613	3.89108	3.95205	3.89753	3.90545	3.93232	3.86224	3.70187	3.84776
dsx	0.192817	0.0466667	24	15	0.0534969	4.01627	4.04937	4.13004	4.05007	4.13683	4.14181	4.14987	4.21316	4.19755	4.07051	4.12555
Mekk1	0.192817	0.0466667	24	15	0.0535043	3.80128	3.84029	3.84668	3.88818	3.83832	3.93602	3.85867	3.95148	3.93233	3.91771	3.8752
CG11141	0.192817	0.0466667	24	0	0.0535831	3.34213	3.41514	3.34543	3.3678	3.31092	3.30893	3.25231	3.19486	3.33701	3.39768	3.39327
Hip14	0.149386	0.0243939	18	6	0.053651	3.97087	3.98162	4.01541	3.98964	4.0576	3.93964	3.85467	3.92634	4.03582	3.94611	3.99852
CG10555	0.149386	0.0243939	18	3	0.0536901	2.78619	2.80429	2.78398	2.75392	2.88298	2.72566	2.67238	2.73105	2.87616	2.82394	2.80784
sick	0.192817	0.0466667	24	3	0.0537133	3.16013	3.2199	3.1648	3.23008	3.14498	3.06629	3.00644	3.09988	3.15205	3.15684	3.14553
Cp190	0.149386	0.0243939	18	6	0.05375	4.63174	4.62072	4.7135	4.64163	4.66635	4.6111	4.52437	4.57136	4.68989	4.62534	4.66723
TrpA1	0.192817	0.0466667	18	6	0.053782	1.68322	1.70539	1.75899	1.74881	1.8002	1.67605	1.64815	1.69819	1.69953	1.73904	1.6739
CG16865	0.192817	0.0466667	18	6	0.0538017	2.72101	2.68919	2.76183	2.76401	2.77338	2.66917	2.71681	2.65918	2.75764	2.6942	2.83727
Bj1	0.0515997	0.0019697	18	3	0.0538363	4.05342	4.07565	4.0334	4.05062	4.01756	3.97792	3.9613	3.95315	4.06511	4.08869	4.0576
CG17002	0.149386	0.0243939	24	0	0.0538975	3.68527	3.75885	3.61055	3.6327	3.67553	3.59367	3.59565	3.53998	3.6563	3.75808	3.59667
CG2278	0.192817	0.0466667	24	3	0.0540091	2.69548	2.75246	2.67487	2.65163	2.70206	2.56941	2.53305	2.5864	2.70138	2.66867	2.66447
CG5608	0.192817	0.0466667	24	3	0.0541189	3.61256	3.66865	3.61641	3.64287	3.63137	3.54621	3.55356	3.51725	3.58319	3.54941	3.62871
Gbeta5	0.149386	0.0243939	18	0	0.0541337	3.66398	3.66318	3.57636	3.48729	3.58785	3.60117	3.5862	3.52757	3.65425	3.60173	3.78468
mrn	0.149386	0.0243939	24	0	0.0541595	3.06989	3.09989	3.0205	3.03295	3.0566	2.94527	2.95763	2.96382	3.04744	3.11545	3.02349
Kal1	0.0515997	0.0019697	24	18	0.0542399	2.10449	2.05246	2.0031	2.02682	2.0256	2.10536	2.05613	2.07487	2.17853	2.17161	2.17734
CG18190	0.192817	0.0466667	18	0	0.0542537	1.35155	1.3665	1.21331	1.24583	1.22134	1.27656	1.31185	1.31266	1.28762	1.3978	1.278
CG16711	0.192817	0.0466667	18	3	0.0542578	3.65721	3.71663	3.68887	3.62283	3.70811	3.64463	3.38948	3.58817	3.72535	3.68096	3.74046
dap	0.192817	0.0466667	18	6	0.0542897	3.22568	3.22463	3.30355	3.24365	3.34025	3.19445	3.22403	3.16826	3.37191	3.24154	3.34923
CG10874	0.149386	0.0243939	24	18	0.0542912	4.68956	4.67846	4.68328	4.68849	4.71694	4.72369	4.75551	4.69717	4.80786	4.81431	4.77584
Tsp3A	0.149386	0.0243939	24	15	0.0543165	2.6392	2.71624	2.72005	2.73178	2.67803	2.76716	2.80957	2.80763	2.7146	2.76506	2.78368
CR43459	0.108914	0.0118182	18	12	0.0543278	2.41464	2.44625	2.41408	2.48012	2.47018	2.62069	2.48176	2.54908	2.42618	2.34787	2.35979
CG2202	0.0763085	0.00515152	24	0	0.0543516	3.45532	3.48833	3.40451	3.41989	3.41456	3.36018	3.27962	3.27715	3.42476	3.44286	3.37616
CG1124	0.0763085	0.00515152	18	12	0.0543914	7.33162	7.29929	7.35456	7.32608	7.42499	7.459	7.43521	7.34631	7.18637	7.13149	7.18746
CG13484	0.192817	0.0466667	18	6	0.0544571	4.19529	4.11209	4.21847	4.1891	4.18676	4.1007	4.13781	4.08272	4.16822	4.18662	4.16829
Snx16	0.192817	0.0466667	18	3	0.0544819	3.60391	3.5314	3.52091	3.56722	3.58415	3.47278	3.50182	3.47939	3.58291	3.57643	3.61292
Syx16	0.108914	0.0118182	24	0	0.0545462	4.32213	4.41753	4.23917	4.24195	4.22207	4.20691	4.2603	4.20178	4.25237	4.30261	4.29107
Ada2a	0.149386	0.0243939	24	0	0.0546244	2.90535	2.87492	2.86257	2.81095	2.84937	2.75402	2.66054	2.8327	2.97235	2.84562	2.86501
scrib	0.149386	0.0243939	18	3	0.0546489	4.62522	4.70762	4.70025	4.70933	4.70484	4.62424	4.43741	4.67757	4.81543	4.77277	4.72345
robo3	0.0763085	0.00515152	18	3	0.0546854	2.33182	2.3545	2.32567	2.28081	2.31942	2.22604	2.20247	2.27817	2.34629	2.32782	2.43669
adp	0.108914	0.0118182	24	21	0.0546869	4.59087	4.6101	4.55744	4.53123	4.49096	4.5884	4.50483	4.53888	4.59089	4.64986	4.61695
vib	0.0763085	0.00515152	18	12	0.054757	4.83953	4.7981	4.81516	4.84443	4.88408	4.89126	4.92935	4.91831	4.72744	4.71846	4.83048
CG6236	0.0763085	0.00515152	18	0	0.0547683	4.17252	4.16484	3.98106	4.0951	4.05181	4.08974	4.05861	4.05873	4.09714	4.15425	4.1016
pico	0.192817	0.0466667	18	3	0.0547914	2.40186	2.43368	2.4588	2.39896	2.47987	2.3546	2.32024	2.40228	2.48075	2.49226	2.54038
Eaat2	0.149386	0.0243939	18	3	0.0548014	4.87488	4.90568	4.87183	4.79474	4.86959	4.84051	4.73878	4.77842	4.99212	4.85185	5.42908
CG5924	0.192817	0.0466667	18	0	0.0548068	2.31943	2.40714	2.22036	2.24197	2.13039	2.30484	2.27369	2.34123	2.29962	2.36477	2.303
CG11723	0.192817	0.0466667	24	0	0.0549241	3.86434	3.90864	3.88427	3.78084	3.76579	3.79809	3.76528	3.69213	3.83766	3.85971	3.83676
Nup133	0.0763085	0.00515152	18	3	0.0549662	2.44892	2.47092	2.46144	2.44672	2.4449	2.3958	2.3415	2.33023	2.48532	2.49259	2.46124
CG1041	0.149386	0.0243939	24	9	0.0549838	4.95298	4.89938	4.98692	5.05715	5.01148	4.94781	5.00844	4.97446	4.92012	4.92103	4.91456
CG3078	0.192817	0.0466667	24	3	0.0550188	3.26626	3.28416	3.20311	3.2251	3.27555	3.13926	3.03198	3.13339	3.27158	3.19755	3.26301
Jheh2	0.149386	0.0243939	24	6	0.0550293	7.28597	7.2561	7.32913	7.29173	7.27941	7.28587	7.27639	7.27413	6.99046	7.05644	7.01947
CG10654	0.0763085	0.00515152	18	6	0.0550343	3.04514	3.02599	3.10698	3.07893	3.08881	2.98406	3.01644	2.98576	3.07697	3.07229	3.15555
ferrochelatase	0.149386	0.0243939	24	3	0.0550585	6.32702	6.46805	6.39937	6.35202	6.32668	6.26108	6.29791	6.29769	6.24405	6.32226	6.30482
CG3225	0.149386	0.0243939	24	0	0.0550602	2.31724	2.21962	2.20596	2.17592	2.2136	2.0804	2.11326	2.11669	2.22101	2.15086	2.24123
CG31760	0.192817	0.0466667	18	3	0.0550745	2.65175	2.66749	2.71148	2.63837	2.76283	2.61462	2.50748	2.63786	2.77629	2.69045	2.90459
CG3857	0.192817	0.0466667	18	3	0.0551021	2.03892	1.99681	1.94026	2.05523	1.99299	1.8782	1.92116	1.97167	2.00792	2.04472	2.08562
Arp8	0.192817	0.0466667	24	0	0.0551668	2.56582	2.62419	2.54577	2.55031	2.51264	2.46638	2.52312	2.44648	2.56912	2.65753	2.53077
Scm	0.192817	0.0466667	18	6	0.0551764	4.29206	4.27409	4.38484	4.31355	4.35328	4.27641	4.15906	4.2809	4.33824	4.28544	4.36914
amon	0.0355378	0.000606061	18	3	0.0551849	3.94934	3.94326	3.92193	3.86451	3.92697	3.8421	3.80205	3.88062	3.97223	3.96946	4.26219
Syx5	0.149386	0.0243939	24	6	0.0553081	5.54767	5.55165	5.56067	5.55376	5.55494	5.4361	5.50659	5.47001	5.43376	5.49124	5.52504
Ndae1	0.108914	0.0118182	18	3	0.0553172	4.35159	4.52263	4.25223	4.23734	4.31479	4.26513	4.22739	4.22593	4.49068	4.53863	4.51236
CG14476	0.149386	0.0243939	24	3	0.0553228	6.60045	6.70426	6.63947	6.6277	6.5719	6.52263	6.49849	6.50335	6.58413	6.61559	6.56358
gammaTub23C	0.108914	0.0118182	24	0	0.0553485	4.23969	4.2107	4.20958	4.12685	4.13989	4.11269	4.13619	4.03227	4.18387	4.22193	4.17046
GABPI	0.108914	0.0118182	24	0	0.0553737	4.50605	4.46328	4.39164	4.42721	4.42605	4.40452	4.40671	4.38565	4.50251	4.50562	4.45441
garz	0.149386	0.0243939	24	0	0.0553794	4.09383	4.14296	4.0808	4.07078	4.09064	3.97031	3.85728	3.97416	4.07847	4.10649	4.0716
MKP-4	0.0194852	0.000151515	24	0	0.055412	3.20684	3.21632	3.13693	3.11913	3.1083	3.08794	3.06274	3.08281	3.17581	3.16015	3.13752
fra	0.0515997	0.0019697	18	3	0.0554464	2.07021	2.06706	2.05873	2.04779	2.11211	1.95695	1.92157	2.03889	2.12928	2.14125	2.20818
Rnp4F	0.149386	0.0243939	24	0	0.0555159	3.93729	3.99504	3.94051	3.9069	3.89338	3.89111	3.83986	3.85194	4.0009	3.92613	3.96428
CG5524	0.192817	0.0466667	24	3	0.0555563	3.3326	3.31599	3.38507	3.29568	3.33181	3.25096	3.24569	3.21064	3.26848	3.23995	3.30853
Cdk4	0.192817	0.0466667	24	18	0.0555728	2.97619	2.94762	2.94678	3.02099	2.95672	2.96565	2.99741	3.03149	3.07576	3.05861	3.1085
CG8187	0.192817	0.0466667	24	9	0.055613	4.73549	4.69991	4.79311	4.71035	4.83674	4.71905	4.78514	4.68312	4.65473	4.64847	4.62993
nuf	0.192817	0.0466667	18	9	0.0556812	5.74255	5.62552	5.82901	5.78897	5.93923	5.81358	5.77074	5.77566	5.75185	5.63111	5.82043
brm	0.192817	0.0466667	18	3	0.0557068	4.26871	4.30922	4.31101	4.29726	4.29093	4.22858	4.11929	4.21893	4.33394	4.33454	4.30594
CG1492	0.149386	0.0243939	24	0	0.05571	2.77941	2.6908	2.65045	2.64523	2.66766	2.66506	2.6028	2.57713	2.66603	2.72002	2.73414
ihog	0.192817	0.0466667	18	3	0.0557503	1.92349	1.97342	1.9263	1.96542	1.94873	1.83911	1.84429	1.91405	1.9989	1.98598	1.94565
CG5482	0.149386	0.0243939	18	12	0.0557916	6.13881	6.19741	6.20917	6.28775	6.15553	6.2063	6.33604	6.28818	6.11342	6.11686	6.16996
Arp5	0.0355378	0.000606061	24	0	0.055841	3.01435	3.0022	2.96516	2.94985	2.94428	2.92163	2.8775	2.83151	2.99516	2.999	3.00627
sra	0.149386	0.0243939	24	9	0.0558573	5.82126	5.80399	5.88395	5.84413	5.91528	5.91947	5.84929	5.81826	5.79014	5.7762	5.76717
Cdc37	0.108914	0.0118182	24	0	0.0558696	5.30421	5.29666	5.21697	5.25655	5.22587	5.09815	5.17759	5.13714	5.25291	5.21244	5.26573
CG4078	0.192817	0.0466667	18	15	0.0558783	2.17088	2.18623	2.18418	2.14875	2.08984	2.25608	2.26339	2.23145	2.12486	2.18133	2.1615
CG31145	0.0515997	0.0019697	18	3	0.055919	5.31611	5.34058	5.32192	5.30595	5.32837	5.24427	5.14385	5.25103	5.37462	5.37896	5.43583
Acer	0.0763085	0.00515152	24	12	0.0559212	5.87216	5.85594	5.96311	5.9151	5.93336	5.98248	5.94177	5.98928	5.87963	5.92593	5.85748
Gs1	0.149386	0.0243939	18	12	0.0559419	7.4672	7.49273	7.54517	7.48635	7.54637	7.61452	7.75038	7.52057	7.39918	7.47317	7.48095
P5cr	0.149386	0.0243939	24	0	0.0559435	5.53742	5.53705	5.43394	5.4277	5.47918	5.36353	5.41474	5.31738	5.43569	5.51741	5.39559
CG12091	0.149386	0.0243939	24	3	0.0559539	8.05348	8.08158	7.97218	8.01317	7.965	7.96744	7.88967	7.90888	7.95535	7.97529	7.92131
CG8042	0.0763085	0.00515152	24	3	0.0560298	5.53958	5.5428	5.51087	5.45783	5.41998	5.40915	5.36576	5.40389	5.43306	5.45011	5.44762
CG12209	0.149386	0.0243939	24	3	0.0560566	1.18968	1.20888	1.1758	1.15661	1.22917	1.07754	1.10636	1.08819	1.1102	1.19411	1.14855
CG4133	0.149386	0.0243939	18	3	0.0561812	2.29932	2.31656	2.27961	2.28396	2.31635	2.19144	2.16019	2.2532	2.30762	2.30732	2.50044
U4-U6-60K	0.108914	0.0118182	18	3	0.0562061	2.85603	2.8991	2.85488	2.96451	2.83275	2.75168	2.8212	2.80029	2.91493	3.00644	2.93229
CG3287	0.108914	0.0118182	24	15	0.0562169	4.51609	4.51151	4.56778	4.54604	4.60446	4.70936	4.63778	4.67154	4.59349	4.53483	4.62077
Aats-val	0.0763085	0.00515152	24	0	0.0562348	3.99536	4.05029	3.94035	3.96603	3.91803	3.89464	3.85342	3.92594	3.94962	4.00557	3.99254
dwg	0.149386	0.0243939	18	0	0.0562959	3.33916	3.32268	3.15832	3.23749	3.20649	3.22678	3.2216	3.21516	3.24432	3.33231	3.23054
tx	0.192817	0.0466667	24	6	0.0563589	3.91347	3.88469	3.97056	3.94747	3.95872	3.86411	3.81097	3.88615	3.88551	3.83719	3.83173
CG15611	0.0515997	0.0019697	18	12	0.0563781	5.04751	5.05163	5.06755	5.09661	5.16309	5.20444	5.15456	5.12782	4.83343	4.80234	4.8255
IntS6	0.0515997	0.0019697	18	3	0.0564247	2.76637	2.80928	2.7777	2.7572	2.78549	2.7051	2.60227	2.70589	2.8471	2.81728	2.81943
Sec22	0.192817	0.0466667	24	3	0.0564892	5.87128	5.8885	5.83431	5.82615	5.83508	5.71958	5.78143	5.79193	5.75387	5.7715	5.77722
CG12994	0.108914	0.0118182	24	0	0.0565091	2.08616	2.03452	1.98344	1.94417	1.95689	1.95484	1.92234	1.91887	1.97436	1.99516	2.11742
CG33523	0.0763085	0.00515152	24	6	0.0565365	5.70714	5.7259	5.81459	5.80324	5.78918	5.70946	5.69123	5.68031	5.66795	5.69986	5.66889
Ddx1	0.0763085	0.00515152	24	0	0.0566346	3.87014	3.85485	3.78043	3.78673	3.73511	3.7176	3.70858	3.74909	3.777	3.84279	3.79654
CG17737	0.192817	0.0466667	18	9	0.0566928	7.90757	7.77318	7.9842	7.96754	8.05887	7.96541	8.03292	7.94965	7.91071	7.81528	7.97382
CG8950	0.0763085	0.00515152	24	3	0.0566936	2.06765	2.06923	2.03638	2.03788	2.03705	1.9185	1.92599	1.94767	1.98822	2.02463	2.05315
CG42708	0.192817	0.0466667	24	9	0.0567382	4.97384	5.02343	5.10506	5.06103	4.98938	5.02334	4.93239	5.04366	4.92403	4.90844	4.92798
CG11597	0.192817	0.0466667	24	18	0.0567548	1.96766	1.96113	1.8576	1.99516	1.95151	2.0416	2.03653	2.01907	2.05039	1.98395	2.09045
olf186-F	0.149386	0.0243939	18	6	0.0567568	4.1483	4.17081	4.24952	4.21542	4.29029	4.19338	4.12525	4.16874	4.202	4.18871	4.17582
CG8605	0.0763085	0.00515152	24	3	0.0567909	3.87075	3.86289	3.71123	3.72278	3.73428	3.65148	3.6079	3.71091	3.71537	3.67501	3.70631
Dref	0.149386	0.0243939	24	0	0.0567948	3.91831	3.90578	3.77654	3.824	3.83122	3.86402	3.77067	3.72509	3.86424	3.82581	3.86615
CG7146	0.108914	0.0118182	18	3	0.0568566	3.28793	3.25283	3.27177	3.25185	3.25946	3.20319	3.14694	3.17351	3.2953	3.28558	3.28079
cos	0.108914	0.0118182	18	3	0.0568992	2.33283	2.42541	2.3607	2.31174	2.34416	2.28089	2.19723	2.2745	2.36738	2.38507	2.44961
dgt5	0.192817	0.0466667	18	0	0.0569076	1.61489	1.56923	1.45251	1.48201	1.48175	1.53657	1.47944	1.47537	1.48212	1.53524	1.54465
CG17985	0.0355378	0.000606061	24	21	0.056965	3.96158	3.96139	3.87977	3.89879	3.88176	3.95659	3.89319	3.91181	4.00026	3.96662	4.00988
CG10428	0.192817	0.0466667	18	3	0.0570127	3.41817	3.42582	3.47079	3.46104	3.4871	3.33426	3.39196	3.37861	3.51319	3.52361	3.51571
CG8083	0.149386	0.0243939	24	12	0.0570275	1.67179	1.74432	1.79205	1.76565	1.8277	1.80457	1.93414	1.80979	1.74978	1.76901	1.6567
CG33704	0.192817	0.0466667	24	0	0.0570845	1.48422	1.22945	1.16634	1.21752	1.16328	1.1311	1.15309	1.10032	1.19471	1.52818	1.16316
CG8435	0.0763085	0.00515152	24	0	0.0570924	3.51497	3.52283	3.43816	3.47659	3.51158	3.3618	3.38616	3.38792	3.50637	3.4578	3.51388
Grip84	0.0763085	0.00515152	24	0	0.0571423	3.48586	3.46604	3.43872	3.38573	3.43514	3.38772	3.27037	3.34587	3.48589	3.44863	3.46125
CG7639	0.108914	0.0118182	24	6	0.0571777	3.95564	3.9922	4.02597	4.08259	4.08159	3.95844	3.92802	3.9462	3.95384	3.94401	3.89035
CG3368	0.149386	0.0243939	24	0	0.0571828	3.42177	3.50987	3.36003	3.44124	3.40898	3.37572	3.34177	3.29633	3.45478	3.4838	3.42109
Opbp	0.0763085	0.00515152	24	0	0.0571912	3.53586	3.48872	3.45313	3.44115	3.42049	3.3693	3.40355	3.39631	3.48948	3.49736	3.44986
CG10635	0.0355378	0.000606061	18	6	0.0572635	5.82181	5.79927	5.85266	5.85015	5.94347	5.68663	5.79506	5.76791	5.8278	5.82588	5.81019
CG1597	0.192817	0.0466667	18	0	0.0572678	3.79691	3.82356	3.66012	3.74288	3.70357	3.75153	3.71266	3.66604	3.76669	3.83438	3.74447
psh	0.192817	0.0466667	24	18	0.0573167	5.07398	5.08895	5.19978	5.18283	5.13584	5.20828	5.22434	5.20852	5.25694	5.228	5.25595
CG10268	0.149386	0.0243939	24	0	0.057385	3.07591	3.15956	3.02208	3.10234	3.016	2.98872	2.94514	2.96283	3.04279	3.06034	3.09982
snz	0.108914	0.0118182	24	0	0.0574039	3.85152	3.89173	3.8238	3.80858	3.82583	3.73536	3.60288	3.74821	3.86298	3.8162	3.8901
Mlh1	0.0763085	0.00515152	18	0	0.0574211	1.87483	1.90145	1.73545	1.79316	1.73567	1.76219	1.75329	1.79181	1.85244	1.80474	1.85666
CG6362	0.149386	0.0243939	24	3	0.0574273	1.64986	1.70324	1.68613	1.66032	1.62455	1.5794	1.54588	1.59051	1.55463	1.6184	1.58868
CG10166	0.192817	0.0466667	18	6	0.0574621	5.65761	5.71798	5.73248	5.77639	5.73479	5.60599	5.70936	5.58677	5.6618	5.71234	5.67387
Pak3	0.149386	0.0243939	24	15	0.0575324	3.72029	3.75375	3.7868	3.81814	3.86768	3.93504	3.85373	3.87974	3.88384	3.83784	3.87711
CG6712	0.192817	0.0466667	24	15	0.0575514	2.83715	2.82919	2.87687	2.81671	2.88094	2.90459	2.9724	2.94895	2.87529	2.94788	2.92376
Tcp-1zeta	0.0515997	0.0019697	24	3	0.0575882	6.22072	6.28386	6.20137	6.16844	6.16007	6.11017	6.1079	6.06948	6.15314	6.17038	6.12775
CG5807	0.108914	0.0118182	18	6	0.057706	3.48281	3.49941	3.54149	3.56526	3.56964	3.48886	3.44341	3.43245	3.52041	3.57171	3.50219
CG4213	0.149386	0.0243939	24	6	0.0577954	5.0463	4.9986	5.05265	5.07911	5.0624	4.9972	4.91314	5.03065	5.02072	4.90918	4.9259
mRpS29	0.108914	0.0118182	24	0	0.0577997	4.8477	4.96146	4.84418	4.80172	4.8533	4.79329	4.7634	4.75421	4.86687	4.89279	4.84747
CG1582	0.149386	0.0243939	24	0	0.0578627	4.33525	4.42508	4.27813	4.28521	4.21734	4.20869	4.0993	4.2269	4.30812	4.24391	4.23406
rt	0.0355378	0.000606061	24	6	0.0579012	1.8206	1.82309	1.86407	1.84075	1.85435	1.79498	1.7815	1.77175	1.6862	1.66103	1.77703
okr	0.192817	0.0466667	24	0	0.0579555	2.49235	2.5712	2.45504	2.49424	2.41077	2.36089	2.41105	2.39972	2.45279	2.50248	2.48657
krimp	0.0763085	0.00515152	24	0	0.0580165	1.50238	1.4669	1.41426	1.43825	1.43291	1.3257	1.35502	1.33701	1.42055	1.45646	1.48337
mus309	0.0194852	0.000151515	24	0	0.0580535	1.71884	1.73963	1.67277	1.6512	1.64642	1.56439	1.55298	1.62333	1.68528	1.69201	1.70198
gcl	0.192817	0.0466667	24	15	0.0580648	3.69868	3.73735	3.75922	3.71834	3.82505	3.89587	3.90932	3.87082	3.79923	3.73019	3.76604
Lnk	0.192817	0.0466667	24	3	0.058068	4.27532	4.36634	4.26325	4.29069	4.30304	4.18122	4.16882	4.1556	4.26642	4.23221	4.29264
Spps	0.108914	0.0118182	24	3	0.0580778	2.56922	2.61591	2.5798	2.59786	2.56406	2.48787	2.35872	2.45143	2.55761	2.57372	2.52329
CG3295	0.0355378	0.000606061	18	3	0.058092	4.99078	5.05336	4.96142	5.04792	4.95275	4.91596	4.95219	4.87791	5.11507	5.12903	5.07104
sced	0.0763085	0.00515152	24	3	0.0581338	2.14632	2.16284	2.12648	2.0929	2.10729	2.02838	1.99038	2.02617	2.09071	2.02471	2.10256
CG12413	0.0355378	0.000606061	24	0	0.0581404	2.70451	2.74091	2.65382	2.6449	2.62943	2.55701	2.59025	2.52992	2.66352	2.67077	2.6488
CG2006	0.149386	0.0243939	18	3	0.058142	3.15072	3.13352	3.05666	3.12877	3.10166	3.05002	3.04308	3.02283	3.16471	3.14062	3.06337
Oseg6	0.108914	0.0118182	24	3	0.0581431	1.57001	1.54592	1.56446	1.5654	1.53053	1.44465	1.39797	1.43869	1.51358	1.49957	1.56121
mip40	0.149386	0.0243939	24	12	0.0581772	4.37254	4.32422	4.41746	4.41548	4.40617	4.41199	4.47743	4.45447	4.3474	4.3825	4.32203
CG13667	0.0763085	0.00515152	24	0	0.0582217	2.58147	2.61908	2.52725	2.53609	2.57386	2.47035	2.49034	2.50335	2.58277	2.5894	2.60942
CG32813	0.149386	0.0243939	24	3	0.0582569	3.72523	3.71584	3.64599	3.71109	3.67975	3.61712	3.59747	3.62632	3.62997	3.70306	3.5406
gem	0.192817	0.0466667	24	9	0.0582669	6.3865	6.41999	6.44669	6.4241	6.49401	6.44242	6.28755	6.43602	6.35404	6.26494	6.34128
mit(1)15	0.192817	0.0466667	18	0	0.0583235	3.54868	3.48115	3.39623	3.35908	3.38094	3.46081	3.39587	3.4569	3.50492	3.45347	3.42394
CG30000	0.0763085	0.00515152	18	12	0.0583536	5.05895	5.1035	5.10939	5.20025	5.10295	5.12616	5.22419	5.1983	4.96562	5.03775	5.02093
Tdc2	0.108914	0.0118182	18	0	0.0583841	1.92833	1.92213	1.78564	1.82402	1.78444	1.80648	1.83075	1.76384	1.86457	1.89538	1.89346
SAK	0.108914	0.0118182	24	3	0.0583972	2.22702	2.20254	2.19239	2.16456	2.24981	2.08333	2.09796	2.06425	2.13826	2.19024	2.1817
mus308	0.0763085	0.00515152	24	0	0.0584079	1.89844	1.95469	1.89706	1.85309	1.85538	1.79092	1.76159	1.81035	1.90197	1.92455	1.87338
Map60	0.0355378	0.000606061	24	21	0.0584293	2.76623	2.71932	2.66903	2.63494	2.70823	2.70992	2.71474	2.72138	2.77797	2.79911	2.80646
CG3511	0.149386	0.0243939	24	0	0.0584982	3.33287	3.36408	3.28393	3.30106	3.21799	3.17451	3.24437	3.16949	3.29645	3.24916	3.35595
CG6617	0.192817	0.0466667	24	3	0.0585064	5.70275	5.74405	5.63753	5.60673	5.64382	5.6236	5.54676	5.5512	5.59885	5.63507	5.54103
Prosbeta3	0.192817	0.0466667	24	3	0.0585612	7.54859	7.70781	7.6993	7.52789	7.51112	7.44919	7.47531	7.47648	7.52255	7.53867	7.46166
Aats-leu	0.0763085	0.00515152	24	0	0.0585734	3.91852	3.88771	3.83101	3.81089	3.82815	3.78802	3.75906	3.75242	3.91144	3.86677	3.81299
CG2543	0.192817	0.0466667	24	15	0.0585885	2.89084	2.94381	2.95155	2.9275	2.95322	3.16361	3.19754	3.14631	2.93939	2.94612	2.97119
CG9413	0.149386	0.0243939	24	3	0.0585904	5.58752	5.55569	5.53933	5.46815	5.58485	5.47045	5.4222	5.41486	5.50309	5.47172	5.53895
CG3680	0.192817	0.0466667	18	6	0.0585935	4.56455	4.53983	4.59784	4.55257	4.59106	4.47986	4.37264	4.49234	4.56655	4.49315	4.59598
CG1718	0.149386	0.0243939	24	9	0.0586245	3.92684	3.93963	3.97265	3.97188	3.95648	3.93276	3.98063	3.96	3.78863	3.71572	3.78008
CG11122	0.149386	0.0243939	24	0	0.0586322	2.50289	2.61596	2.45559	2.50473	2.45333	2.42426	2.3218	2.44687	2.54641	2.5324	2.45486
CG4935	0.108914	0.0118182	18	3	0.0586528	2.02743	2.09327	2.02981	2.11628	2.03439	1.94299	1.96668	2.01181	2.12709	2.19703	2.28621
CG17359	0.0763085	0.00515152	24	0	0.0587079	2.56014	2.71945	2.55108	2.52374	2.5274	2.46417	2.49167	2.48205	2.57518	2.59745	2.59379
pall	0.108914	0.0118182	18	6	0.0588425	4.32867	4.27401	4.40218	4.33067	4.35369	4.25435	4.26358	4.20542	4.32538	4.33707	4.39752
spict	0.192817	0.0466667	24	15	0.0588464	4.64175	4.7891	4.74238	4.81395	4.8083	4.86101	4.90703	4.91666	4.79323	4.78403	4.85335
CG11007	0.0763085	0.00515152	18	3	0.0589047	3.87193	3.84082	3.79182	3.82199	3.74016	3.65297	3.74695	3.74498	3.90688	3.9202	3.86903
Sep5	0.149386	0.0243939	24	3	0.0589065	1.55105	1.51069	1.43426	1.47962	1.49457	1.35053	1.39674	1.43637	1.38727	1.4573	1.4609
kek2	0.192817	0.0466667	24	0	0.0589084	2.11062	2.10493	2.08808	2.02078	2.09934	2.0139	1.92731	2.02417	2.08329	2.09336	2.23692
CG8223	0.0763085	0.00515152	18	9	0.0589155	4.06227	4.01021	4.19564	4.17211	4.15068	4.13224	4.14546	4.07219	4.11696	4.10839	4.13152
DIP1	0.192817	0.0466667	24	3	0.0589511	6.05519	6.12633	6.01965	5.971	6.01164	5.91035	5.93105	5.95324	5.97696	5.91886	6.02661
CG14977	0.192817	0.0466667	24	15	0.0589541	6.12981	6.02581	6.09356	6.08216	6.09747	6.16425	6.21631	6.18213	6.19845	6.1379	6.12874
jumu	0.192817	0.0466667	18	6	0.0589598	1.74643	1.80217	1.77701	1.7998	1.86614	1.70071	1.68654	1.70735	1.76125	1.83233	1.77693
CG3862	0.192817	0.0466667	24	9	0.0589621	4.43576	4.52866	4.54572	4.59233	4.59581	4.46839	4.57546	4.45396	4.38821	4.51585	4.36123
CG3719	0.192817	0.0466667	24	3	0.0589782	7.13373	7.11603	7.11161	7.05487	7.11841	7.03233	7.01384	7.00291	7.06436	7.07853	6.99369
Rpt4	0.192817	0.0466667	24	3	0.0590009	6.82545	6.97445	6.91088	6.80434	6.76708	6.74377	6.73909	6.75938	6.79151	6.80044	6.69158
pgant3	0.192817	0.0466667	24	0	0.0590367	3.29786	3.32387	3.15562	3.29752	3.25636	3.15753	3.23618	3.08226	3.25509	3.26496	3.25805
CG14215	0.0515997	0.0019697	24	0	0.0590649	2.98255	3.04579	2.92734	2.91736	2.88157	2.88415	2.74926	2.87818	2.97859	2.94423	2.92049
nct	0.149386	0.0243939	18	6	0.059094	4.1103	4.10827	4.13447	4.16167	4.19285	4.05532	4.05569	4.03916	4.18329	4.12059	4.23019
CG34113	0.192817	0.0466667	18	3	0.0591331	1.86742	1.88582	1.87724	1.83798	1.87851	1.80261	1.7171	1.77741	1.92329	1.85195	2.0498
CG7523	0.192817	0.0466667	24	15	0.0592395	5.58932	5.606	5.64181	5.64224	5.70939	5.68873	5.78365	5.71093	5.73789	5.66524	5.72728
CG14252	0.108914	0.0118182	18	6	0.0593264	2.99315	2.91219	3.0173	3.06386	3.03724	2.95906	2.9881	2.89359	2.98953	3.03149	2.99589
Bap	0.108914	0.0118182	18	0	0.0594573	5.28243	5.3212	5.21768	5.19772	5.16738	5.2278	5.12036	5.21019	5.26489	5.26197	5.23931
ncm	0.192817	0.0466667	18	6	0.0594613	3.95175	3.97222	4.02479	3.96997	4.0088	3.9083	3.8438	3.88851	3.96826	3.9364	4.01047
CG7154	0.192817	0.0466667	18	6	0.0594732	3.61983	3.65546	3.67179	3.6364	3.65284	3.55549	3.5207	3.54909	3.63278	3.62662	3.58659
CG2982	0.149386	0.0243939	24	12	0.0594748	3.38482	3.44963	3.44966	3.46798	3.47365	3.60592	3.57454	3.61689	3.49597	3.45957	3.44004
BubR1	0.0194852	0.000151515	24	3	0.0594877	1.77667	1.77135	1.74009	1.75105	1.73698	1.62132	1.63347	1.65973	1.69217	1.70338	1.71662
CG7903	0.192817	0.0466667	24	3	0.0595343	4.94312	4.99185	4.98649	4.95349	4.99471	4.88407	4.84867	4.85294	4.91749	4.96925	4.89574
CG18661	0.192817	0.0466667	24	21	0.0595351	3.70588	3.66813	3.61724	3.58728	3.50337	3.6598	3.65019	3.60281	3.61617	3.71521	3.74076
Patr-1	0.149386	0.0243939	18	6	0.0595388	3.3549	3.34276	3.39965	3.37333	3.42568	3.31222	3.2032	3.29235	3.42215	3.35603	3.43877
Spindly	0.0515997	0.0019697	24	0	0.059547	1.94739	1.96226	1.87067	1.90735	1.87877	1.77545	1.84358	1.79543	1.9385	1.87102	1.92257
CG18437	0.149386	0.0243939	18	3	0.0595604	3.28539	3.30853	3.28961	3.23994	3.34722	3.20034	3.0843	3.26381	3.37551	3.3445	3.4803
CG1234	0.192817	0.0466667	18	3	0.0595608	3.36331	3.34827	3.41826	3.31044	3.31244	3.25872	3.2844	3.24588	3.37351	3.37861	3.36115
Cog7	0.0515997	0.0019697	18	3	0.0595711	3.51941	3.5348	3.51376	3.49141	3.47949	3.45864	3.36032	3.3953	3.57313	3.5797	3.51669
Rab39	0.192817	0.0466667	18	15	0.0595874	5.38356	5.41965	5.33855	5.33004	5.36065	5.46168	5.47468	5.41748	5.3567	5.32828	5.40335
nonC	0.108914	0.0118182	24	0	0.0595997	3.1423	3.2239	3.098	3.11411	3.06488	3.05687	2.89563	3.06431	3.14774	3.164	3.09101
EndoG	0.192817	0.0466667	24	0	0.0596169	3.81089	3.72631	3.63747	3.72355	3.70348	3.66882	3.65053	3.64676	3.74199	3.74967	3.75275
CG7135	0.108914	0.0118182	18	6	0.0596371	1.86207	1.86042	1.94558	1.8727	1.92924	1.78573	1.80569	1.80429	1.86363	1.91061	3.20236
CG3703	0.192817	0.0466667	18	0	0.0597352	3.004	3.03552	2.84034	2.90276	2.89211	2.9027	2.92209	2.84984	2.92136	2.9599	3.09042
zwilch	0.192817	0.0466667	24	3	0.0598183	1.79379	1.71852	1.59002	1.64156	1.56105	1.51428	1.57501	1.50566	1.53513	1.62908	1.61896
CG7261	0.108914	0.0118182	24	0	0.0598594	3.04855	3.09333	3.01656	3.05984	3.03584	2.89879	2.88744	2.91254	3.04441	3.04292	3.07393
jub	0.0763085	0.00515152	24	21	0.0599077	3.06611	3.10143	2.98561	3.01368	3.03696	3.06327	3.04804	3.00633	3.09844	3.1749	3.13371
CG6907	0.108914	0.0118182	18	15	0.0599689	3.96528	3.95526	3.88195	3.9026	3.90115	4.00025	4.02684	3.97806	3.99377	3.95661	3.91655
ena	0.192817	0.0466667	18	6	0.0600187	3.18121	3.20483	3.21022	3.1911	3.28105	3.11827	3.02092	3.12669	3.22741	3.17003	3.2097
slx1	0.108914	0.0118182	24	3	0.0601056	1.85219	1.87516	1.8394	1.91777	1.82648	1.7349	1.7404	1.78134	1.83385	1.75898	1.81076
Herp	0.192817	0.0466667	24	3	0.0601197	5.38433	5.40121	5.31353	5.32765	5.35107	5.27989	5.29839	5.26047	5.25212	5.30367	5.22881
Marf	0.108914	0.0118182	18	6	0.0601262	7.72229	7.7127	7.75389	7.74848	7.77198	7.68534	7.57101	7.64053	7.74722	7.7148	7.65549
CG8481	0.149386	0.0243939	18	12	0.0601332	5.24905	5.18396	5.20072	5.22403	5.24375	5.34894	5.33144	5.25683	5.20806	5.15722	5.18243
DAAM	0.192817	0.0466667	24	21	0.0601375	2.49966	2.59319	2.48339	2.56841	2.48064	2.489	2.5319	2.57038	2.58389	2.65037	2.79529
CG7518	0.149386	0.0243939	24	0	0.0601505	3.88936	3.99224	3.86937	3.87732	3.886	3.8084	3.61332	3.83191	3.95601	3.9536	3.84382
Nup153	0.149386	0.0243939	24	3	0.0601971	3.87482	3.95936	3.94364	3.9044	3.95504	3.78427	3.68663	3.85778	3.89476	3.86119	3.89891
pon	0.0763085	0.00515152	24	3	0.0602044	1.96926	1.98174	1.94808	1.90149	1.88156	1.80341	1.69533	1.81665	1.89846	1.88033	1.91041
CG2691	0.149386	0.0243939	18	0	0.0602252	3.71615	3.76326	3.60792	3.62993	3.61083	3.66569	3.60442	3.65797	3.65265	3.67956	3.66918
unc-5	0.108914	0.0118182	18	3	0.0602451	2.17781	2.13464	2.1261	2.11088	2.21768	2.12602	1.99209	2.04517	2.24233	2.20368	2.39493
Ets96B	0.0763085	0.00515152	18	3	0.0602577	1.9657	1.98344	1.89644	1.86164	1.93913	1.86002	1.84943	1.83144	2.04435	2.03361	1.91099
CG9754	0.149386	0.0243939	18	6	0.0602824	2.51393	2.45397	2.50186	2.5155	2.54362	2.43262	2.3914	2.41423	2.49956	2.50603	2.49388
CG8915	0.0763085	0.00515152	18	3	0.060291	1.94598	2.01999	2.0093	1.99755	1.97309	1.90682	1.91816	1.89726	2.04596	2.04922	2.12276
Mst36Fa	0.192817	0.0466667	18	6	0.0603221	1.85034	1.80034	1.8046	1.88502	1.89535	1.7548	1.76644	1.69617	1.84295	1.88531	1.87311
CG17026	0.192817	0.0466667	18	12	0.0603951	4.40694	4.30255	4.46322	4.48821	4.38015	4.45204	4.58288	4.47456	4.28612	4.27391	4.40667
CG43129	0.192817	0.0466667	24	3	0.0604387	2.33831	2.36621	2.24539	2.29458	2.22642	2.1827	2.21425	2.13962	2.2699	2.27676	2.17225
Fip1	0.149386	0.0243939	24	0	0.0604537	3.97669	4.07335	3.9801	3.97595	3.9467	3.88317	3.87144	3.84306	3.98841	3.99127	3.9628
CG2794	0.108914	0.0118182	24	0	0.0604767	2.6942	2.68474	2.60497	2.64922	2.54559	2.54345	2.56732	2.55974	2.63473	2.67728	2.61181
CG7655	0.149386	0.0243939	24	3	0.0606058	4.20831	4.24831	4.23589	4.14964	4.1909	4.06285	4.10162	4.10574	4.22071	4.11799	4.18891
CG7372	0.149386	0.0243939	18	3	0.0606204	1.46029	1.49419	1.48116	1.50681	1.50478	1.42236	1.37017	1.40055	1.52817	1.51271	1.54965
Gs2	0.149386	0.0243939	24	18	0.0606302	9.42066	9.4255	9.41838	9.38429	9.37838	9.50219	9.50464	9.49281	9.54028	9.46988	9.49736
spn-A	0.192817	0.0466667	18	0	0.0606595	3.51881	3.49962	3.32189	3.40269	3.41853	3.40551	3.49266	3.38413	3.45075	3.47474	3.45212
CG5235	0.0194852	0.000151515	24	3	0.0606748	1.62149	1.59704	1.52605	1.56093	1.55744	1.45122	1.48858	1.42688	1.51118	1.50679	1.52202
CG31550	0.0763085	0.00515152	18	3	0.0606874	4.70906	4.71559	4.65195	4.61624	4.66689	4.62624	4.53147	4.57861	4.73043	4.70494	4.72424
srpk79D	0.108914	0.0118182	24	0	0.0607336	5.55021	5.55468	5.49117	5.42527	5.53004	5.41475	5.29296	5.38038	5.53828	5.46618	5.46635
CG42346	0.192817	0.0466667	18	3	0.0607416	1.55353	1.52062	1.55497	1.49199	1.61497	1.44922	1.42187	1.48048	1.64615	1.55427	1.71051
Mad1	0.192817	0.0466667	18	6	0.0607749	3.33944	3.30447	3.36241	3.39063	3.36695	3.27619	3.28127	3.22158	3.38236	3.33376	3.41047
CG4164	0.0763085	0.00515152	24	3	0.0608499	5.21426	5.24076	5.14727	5.18176	5.12244	4.91879	5.09602	5.09743	5.0624	5.13778	5.09854
CG10959	0.108914	0.0118182	24	0	0.060855	1.76126	1.81025	1.75419	1.71301	1.70318	1.6008	1.64269	1.64442	1.6995	1.77924	1.75603
barr	0.0194852	0.000151515	18	3	0.0609535	2.47684	2.47921	2.47191	2.44342	2.42391	2.39233	2.38402	2.32532	2.52495	2.51989	2.49726
CG2641	0.192817	0.0466667	18	6	0.0609761	3.46809	3.48745	3.48831	3.57052	3.60481	3.45797	3.44304	3.40817	3.47428	3.47433	3.437
CG10137	0.149386	0.0243939	18	3	0.0610204	3.11221	3.11718	3.06085	3.02522	3.06019	2.96724	2.91103	3.06654	3.10713	3.12492	3.21757
PI4KIIIalpha	0.192817	0.0466667	24	0	0.0611794	5.2057	5.37879	5.18695	5.22832	5.1663	5.12779	4.95856	5.1345	5.25505	5.25556	5.14537
CG16721	0.192817	0.0466667	18	3	0.0612072	5.47108	5.44647	5.4941	5.54821	5.50488	5.42467	5.3923	5.36987	5.73511	5.67114	5.76949
CG13921	0.149386	0.0243939	18	3	0.061214	1.63415	1.72169	1.63147	1.67865	1.66272	1.57847	1.54624	1.59425	1.67663	1.71678	1.79708
CG13151	0.108914	0.0118182	18	0	0.0612411	2.22699	2.25081	2.03447	2.11857	2.10361	2.10495	2.10533	2.11427	2.23466	2.19979	2.22096
CG13728	0.192817	0.0466667	24	3	0.0613574	1.87002	1.88938	1.84421	1.8536	1.95084	1.71533	1.70296	1.77769	1.84214	1.92603	1.79873
CG12877	0.149386	0.0243939	18	3	0.061367	3.88641	3.876	3.84928	3.86849	3.84123	3.79868	3.69483	3.7637	3.904	3.89298	3.82764
Slu7	0.149386	0.0243939	18	6	0.0613764	3.6289	3.63728	3.72081	3.70067	3.70635	3.5753	3.63778	3.60248	3.65242	3.61373	3.67171
CG14561	0.149386	0.0243939	24	0	0.061444	1.80376	1.71145	1.68205	1.64899	1.62339	1.65766	1.62464	1.61703	1.68996	1.73739	1.72693
CG9318	0.192817	0.0466667	18	6	0.061477	6.02448	6.06851	6.12655	6.105	6.1814	6.08338	6.02076	6.03091	6.12056	6.12063	6.11004
CG3226	0.0515997	0.0019697	24	3	0.0615178	6.72927	6.74123	6.72892	6.6809	6.68967	6.58938	6.65078	6.60276	6.67806	6.63659	6.61009
CG6231	0.149386	0.0243939	24	15	0.0615617	4.81579	4.69843	4.85824	4.77153	4.84962	4.9958	4.90723	4.92917	4.89118	4.83549	4.83939
Kap3	0.192817	0.0466667	24	3	0.061577	4.20648	4.18352	4.18931	4.13302	4.20346	4.11664	4.02286	4.09089	4.1349	4.08052	4.17284
pigeon	0.108914	0.0118182	24	0	0.0615979	2.53956	2.54532	2.49903	2.50023	2.50023	2.38473	2.35736	2.41192	2.49989	2.51625	2.56003
l(2)37Cc	0.192817	0.0466667	18	0	0.0616127	5.90273	5.91105	5.71087	5.7863	5.73423	5.81344	5.86959	5.84528	5.79125	5.88455	5.78821
CG8008	0.0763085	0.00515152	18	3	0.0616427	3.89706	4.05827	3.82279	3.82218	3.76251	3.80974	3.69611	3.79645	4.10843	4.05488	4.16806
tgo	0.149386	0.0243939	18	3	0.0616469	3.50711	3.5089	3.51019	3.52384	3.50353	3.42095	3.36863	3.43142	3.57067	3.52346	3.54869
CG11926	0.0763085	0.00515152	24	3	0.0616613	4.74611	4.73313	4.74235	4.68667	4.72342	4.65514	4.62324	4.56904	4.67944	4.61806	4.67672
Taf8	0.0515997	0.0019697	24	0	0.0616935	3.11968	3.15412	3.03072	3.05085	3.04312	3.02732	3.03123	3.01381	3.15001	3.11336	3.0584
Msh6	0.108914	0.0118182	24	0	0.0617638	2.04211	2.09774	1.98756	1.9148	1.9276	1.92842	1.91814	1.91392	1.98168	2.00331	2.00203
Ast	0.0515997	0.0019697	24	3	0.06178	5.15143	5.09472	5.08682	5.07382	5.10882	4.94784	5.01192	4.89185	5.05185	5.07936	5.0132
CG11807	0.0763085	0.00515152	18	6	0.0617845	4.82514	4.81725	4.86623	4.83878	4.8585	4.76126	4.72663	4.74326	4.83573	4.7663	4.82304
r-cup	0.0763085	0.00515152	18	6	0.0619008	1.28365	1.23053	1.29336	1.28678	1.2925	1.1658	1.19594	1.2053	1.25123	1.27034	1.26998
CG3505	0.192817	0.0466667	24	3	0.0619915	5.56551	5.52983	5.51266	5.56422	5.51272	5.41229	5.49814	5.46275	5.3364	5.44619	5.50726
CG7024	0.192817	0.0466667	24	0	0.0620282	1.52558	1.47326	1.42049	1.44053	1.4072	1.35339	1.39502	1.31679	1.37127	1.60743	1.45922
Sod3	0.192817	0.0466667	24	9	0.0620365	4.7612	4.68341	4.81165	4.75877	4.79515	4.78532	4.77522	4.75139	4.70081	4.64745	4.68406
beta-Spec	0.108914	0.0118182	24	3	0.0620546	6.45732	6.53474	6.43246	6.4807	6.43574	6.38829	6.20277	6.41769	6.4226	6.39209	6.33324
CG8281	0.149386	0.0243939	18	3	0.0621438	4.04446	4.06801	4.03126	4.16431	4.01345	3.99756	3.96268	3.90254	4.07111	4.10293	4.10099
Pmm45A	0.0763085	0.00515152	24	15	0.0621641	4.42371	4.44525	4.43507	4.46767	4.46308	4.55151	4.52281	4.57878	4.48801	4.57135	4.48408
ald	0.149386	0.0243939	24	0	0.0621767	1.67138	1.64452	1.5971	1.58107	1.59522	1.48266	1.5281	1.55141	1.63871	1.56746	1.69965
Taf7	0.149386	0.0243939	24	3	0.0621972	3.11876	3.1423	3.12903	3.17999	3.16262	3.05407	3.04119	3.00324	3.07791	3.06809	3.07898
CG13404	0.192817	0.0466667	18	6	0.0622886	3.07705	3.04359	3.16519	3.00987	3.1576	2.99529	2.99148	2.95542	3.13128	3.06619	3.09182
CG31235	0.108914	0.0118182	24	21	0.0623232	1.98861	2.00767	1.93892	1.98171	1.9026	2.00007	1.94706	1.91596	2.03449	2.07198	2.07056
CG14082	0.149386	0.0243939	18	6	0.0623265	1.63357	1.59	1.72139	1.67878	1.67941	1.60747	1.55812	1.62534	1.66096	1.67084	1.82661
Eps-15	0.149386	0.0243939	18	3	0.0624036	4.49696	4.55072	4.50716	4.47872	4.49999	4.44794	4.33814	4.41022	4.54199	4.5397	4.52705
CG15651	0.192817	0.0466667	18	3	0.0625051	2.33855	2.28135	2.33205	2.31701	2.34655	2.25215	2.20149	2.23515	2.34692	2.33847	2.41476
jing	0.149386	0.0243939	18	3	0.0625066	1.98746	2.02752	2.01961	1.9989	2.05739	1.92267	1.86149	1.9437	2.07346	2.03739	2.08203
RhoGEF4	0.0515997	0.0019697	24	3	0.0625651	1.64971	1.65943	1.58218	1.60266	1.55322	1.476	1.50683	1.46391	1.57571	1.55633	1.55311
CG16742	0.149386	0.0243939	18	6	0.062716	2.42968	2.44993	2.49371	2.46383	2.48829	2.35631	2.36052	2.38737	2.46912	2.43523	2.52974
N	0.192817	0.0466667	18	3	0.0627241	2.39104	2.37204	2.43223	2.39358	2.41452	2.28641	2.16675	2.34416	2.56083	2.48895	2.5063
CG5525	0.0763085	0.00515152	24	3	0.0627601	5.39385	5.39626	5.32749	5.36551	5.33895	5.17637	5.18695	5.2014	5.32514	5.38541	5.31273
Aats-met	0.192817	0.0466667	24	3	0.0627623	2.95981	3.03296	2.93897	2.95127	3.00128	2.80015	2.85594	2.7852	2.91327	3.01747	2.94345
CG8247	0.0763085	0.00515152	24	0	0.062776	1.98296	1.90129	1.83519	1.82639	1.87895	1.78143	1.80062	1.73675	1.87814	1.90633	1.83579
Noa36	0.192817	0.0466667	24	18	0.0627979	4.77453	4.71924	4.76602	4.76558	4.73497	4.84012	4.87208	4.79958	4.80908	4.87698	4.8545
Liprin-gamma	0.108914	0.0118182	24	3	0.0628803	4.27121	4.30148	4.26406	4.18732	4.25029	4.17717	4.00176	4.15933	4.19249	4.16772	4.25329
Trn-SR	0.149386	0.0243939	24	3	0.0629713	3.06779	3.13214	3.06031	3.04966	3.01844	2.93675	2.84406	2.92743	3.03236	3.08061	2.9848
CG16718	0.149386	0.0243939	18	9	0.0631109	5.07867	5.03623	5.22678	5.09796	5.23904	5.22181	5.16447	5.15169	5.10674	5.0877	5.11904
btz	0.149386	0.0243939	24	0	0.0631176	4.10731	4.18735	4.07438	4.0984	4.12225	3.99667	3.944	3.99373	4.15601	4.15181	4.0831
Hmt4-20	0.192817	0.0466667	18	6	0.0632207	3.89448	3.93036	3.94564	3.94618	4.00665	3.85167	3.69487	3.86187	3.98885	3.95607	3.96415
bowl	0.192817	0.0466667	18	3	0.0632454	3.31253	3.31158	3.3628	3.33537	3.32252	3.22791	3.17999	3.2576	3.49595	3.44875	3.45291
pnt	0.108914	0.0118182	18	3	0.0633823	2.82183	2.85674	2.83184	2.81676	2.82124	2.73469	2.64652	2.75447	2.87183	2.84518	2.8303
Gef26	0.192817	0.0466667	18	3	0.0634145	3.26948	3.31109	3.31871	3.28473	3.36055	3.21989	3.11245	3.23397	3.43887	3.33681	3.42491
Jupiter	0.192817	0.0466667	18	6	0.0634629	5.69282	5.67865	5.70107	5.71174	5.76872	5.62068	5.55427	5.61744	5.71659	5.63413	5.72837
dia	0.0763085	0.00515152	24	12	0.0636281	3.70487	3.76402	3.77441	3.85507	3.82592	3.90706	3.88879	3.88257	3.77867	3.78253	3.79555
AIF	0.192817	0.0466667	24	0	0.0636433	4.15799	4.20198	4.18335	4.10763	4.15382	4.01964	3.99473	4.04566	4.14736	4.19973	4.13746
zfh1	0.192817	0.0466667	18	3	0.0636491	2.91308	2.90816	2.93633	2.91203	3.00539	2.83356	2.66335	2.85907	3.10182	2.99599	3.0736
Poxm	0.192817	0.0466667	18	6	0.0636571	2.47621	2.51401	2.54982	2.52364	2.51864	2.42547	2.29009	2.43677	2.48333	2.50147	2.41417
CG40198	0.108914	0.0118182	24	3	0.0636672	4.7167	4.64077	4.4693	4.49939	4.57767	4.38804	4.43881	4.44203	4.49462	4.56776	4.49117
Cip4	0.192817	0.0466667	18	6	0.0636743	4.50221	4.47429	4.5753	4.53569	4.64554	4.48666	4.43392	4.47842	4.59873	4.50541	4.61537
Aven	0.0355378	0.000606061	18	3	0.0637037	2.43384	2.40173	2.42232	2.37189	2.38287	2.28422	2.35947	2.27342	2.47886	2.47956	2.49353
Cks85A	0.108914	0.0118182	24	12	0.0637942	5.86948	5.82378	5.93483	6.00053	5.93277	6.04733	6.03493	6.03684	5.97816	5.94483	5.91095
CcapR	0.0515997	0.0019697	24	6	0.0638064	1.4687	1.47753	1.49655	1.44626	1.52127	1.39394	1.4221	1.44354	1.38163	1.3567	1.34025
Hrb98DE	0.0763085	0.00515152	18	6	0.0638458	6.37147	6.35582	6.43796	6.38868	6.46503	6.32303	6.28643	6.3263	6.39593	6.36449	6.43337
CG17068	0.108914	0.0118182	24	0	0.0638491	2.84523	2.87591	2.78623	2.7958	2.8293	2.69853	2.6976	2.74407	2.83494	2.88283	2.78968
SKIP	0.192817	0.0466667	18	6	0.063897	2.01266	1.98436	2.05119	2.03729	2.13161	1.93729	1.91063	1.99067	2.1125	2.01931	2.1627
CG12213	0.192817	0.0466667	18	6	0.0639564	4.42063	4.42378	4.47993	4.49112	4.48351	4.37787	4.39128	4.34718	4.49712	4.4294	4.56065
Cyp4g15	0.108914	0.0118182	24	3	0.0640012	5.19033	5.23241	5.13446	5.15804	5.09034	5.04861	5.02236	5.02019	5.07061	5.11271	5.18603
CG17568	0.108914	0.0118182	18	6	0.0640219	3.17009	3.11866	3.18814	3.18612	3.16184	3.05837	3.09556	3.04276	3.17386	3.11912	3.13807
CG4936	0.108914	0.0118182	24	0	0.0641015	3.41745	3.49802	3.41165	3.41391	3.37374	3.27494	3.30934	3.32774	3.47986	3.3868	3.42152
CG14589	0.149386	0.0243939	18	3	0.0642295	1.75408	1.72557	1.75345	1.73724	1.81731	1.64364	1.64917	1.6883	1.77801	1.88291	1.84642
CG43462	0.192817	0.0466667	24	3	0.0642895	2.58516	2.59693	2.57451	2.51059	2.57832	2.46321	2.3228	2.40579	2.56581	2.49329	2.68339
Acn	0.192817	0.0466667	18	6	0.0643737	5.30623	5.27945	5.32544	5.32817	5.35207	5.23836	5.17469	5.22155	5.36252	5.31078	5.36315
heix	0.149386	0.0243939	18	6	0.0643792	3.52418	3.50821	3.57395	3.53098	3.59942	3.40953	3.44722	3.46396	3.51777	3.46441	3.50092
CG42598	0.0763085	0.00515152	18	6	0.0645177	1.48224	1.48733	1.54114	1.53834	1.54243	1.36836	1.47098	1.41365	1.48938	1.49922	1.63473
insc	0.0355378	0.000606061	24	3	0.0645593	2.82386	2.84571	2.78825	2.82369	2.79394	2.67398	2.68253	2.70756	2.75185	2.79392	2.73513
CG2790	0.0763085	0.00515152	24	6	0.0645699	4.91639	4.87773	4.94821	4.89337	4.93245	4.82276	4.81928	4.86552	4.79681	4.81908	4.83519
CG14516	0.149386	0.0243939	24	6	0.0645803	2.54697	2.62813	2.56662	2.59861	2.58969	2.50514	2.54409	2.49567	2.44711	2.51875	2.45604
Ssl1	0.149386	0.0243939	24	0	0.0646179	3.8359	3.7772	3.74405	3.75501	3.66373	3.70338	3.73928	3.6271	3.79862	3.80775	3.75497
Krn	0.0355378	0.000606061	18	12	0.0646385	3.33142	3.29837	3.33436	3.37527	3.35348	3.42593	3.47907	3.4212	3.30693	3.29358	3.29366
CG4729	0.0515997	0.0019697	24	12	0.0647077	5.65136	5.64956	5.69969	5.72015	5.69032	5.77676	5.80381	5.76199	5.58888	5.67411	5.65725
GalNAc-T1	0.149386	0.0243939	18	3	0.0647816	3.36922	3.41173	3.40593	3.43952	3.41358	3.31633	3.27287	3.33026	3.46868	3.48023	3.46609
JhI-21	0.192817	0.0466667	24	15	0.0648178	3.46643	3.49355	3.58018	3.52997	3.60222	3.63019	3.64357	3.61631	3.59235	3.63554	3.67572
fog	0.149386	0.0243939	18	6	0.0648208	3.14337	3.12567	3.20067	3.2043	3.23368	3.12886	3.04094	3.11127	3.18785	3.14064	3.24316
CG6509	0.108914	0.0118182	18	6	0.0648806	4.22068	4.26437	4.31287	4.26539	4.31704	4.19186	4.01803	4.22344	4.30096	4.25713	4.23761
SRm160	0.0194852	0.000151515	18	3	0.0648868	3.4739	3.4774	3.47273	3.46473	3.4711	3.38604	3.30902	3.34375	3.52209	3.52098	3.49425
CG9631	0.108914	0.0118182	24	9	0.0649026	5.23038	5.23174	5.32756	5.40067	5.3081	5.28353	5.30987	5.25848	5.16897	5.179	5.26698
Syx17	0.192817	0.0466667	18	6	0.0649533	4.84317	4.79817	4.91925	4.8939	4.9712	4.83426	4.88735	4.7651	4.89892	4.90975	4.84341
CG1103	0.108914	0.0118182	18	3	0.0649562	3.26492	3.24432	3.26422	3.25839	3.27813	3.12381	3.18481	3.16189	3.28957	3.32578	3.34567
CG10669	0.0763085	0.00515152	18	6	0.0650017	2.618	2.62599	2.69471	2.66201	2.64856	2.55639	2.53735	2.55687	2.62904	2.6916	2.65633
CG2129	0.0515997	0.0019697	24	0	0.0650432	2.09165	2.11628	2.06704	2.01597	2.00198	1.99844	1.97766	1.96723	2.09123	2.09316	2.04131
Glt	0.0763085	0.00515152	18	3	0.065045	7.26198	7.34371	7.26794	7.16709	7.23117	7.16693	7.1109	7.20707	7.45136	7.37045	7.29922
CG2528	0.0515997	0.0019697	24	21	0.0650713	1.18885	1.04103	1.01932	1.02044	1.01888	1.02737	1.03134	1.03736	1.1459	1.34616	1.09721
Hrd3	0.149386	0.0243939	18	3	0.0651162	4.48669	4.47485	4.48231	4.46844	4.44321	4.3861	4.35627	4.38456	4.46284	4.4894	4.50324
lok	0.192817	0.0466667	24	0	0.0651247	3.04073	3.06933	3.03574	3.07013	2.97769	2.87073	2.84586	2.8031	3.02521	3.0377	3.0376
CG16908	0.108914	0.0118182	24	0	0.0651617	2.65057	2.73331	2.57286	2.64024	2.63223	2.58997	2.54225	2.50291	2.62878	2.64328	2.7083
CG5946	0.192817	0.0466667	18	15	0.0651648	7.40299	7.36294	7.3393	7.35161	7.39924	7.46171	7.52653	7.53218	7.40476	7.41488	7.35197
Vha100-1	0.149386	0.0243939	18	3	0.0651968	5.95849	6.02965	5.99777	5.95719	5.97568	5.90262	5.86773	5.87855	6.02368	5.98334	6.10925
Ero1L	0.149386	0.0243939	24	3	0.0652007	5.09633	5.09306	5.01373	5.02352	5.05574	4.94519	4.96612	4.9501	4.96427	4.95891	4.94166
E(z)	0.108914	0.0118182	18	6	0.0652241	3.69426	3.69546	3.76296	3.74383	3.75529	3.65069	3.60108	3.66427	3.7564	3.70025	3.75605
CG5343	0.192817	0.0466667	18	6	0.0652287	4.15886	4.19088	4.16995	4.20998	4.23633	4.05531	4.1246	4.0205	4.14761	4.22956	4.20828
CG7324	0.108914	0.0118182	18	3	0.065229	5.54274	5.63955	5.61253	5.59281	5.63232	5.55889	5.49727	5.47638	5.72593	5.67567	5.72534
Sry-delta	0.149386	0.0243939	18	6	0.0652389	4.00527	4.03866	4.0412	4.08423	4.05288	3.90775	3.96125	3.8868	3.9839	4.07869	4.02086
Nop56	0.192817	0.0466667	24	15	0.0652696	3.99707	3.99791	4.00995	4.01476	4.06189	4.04839	4.14634	4.2027	4.00863	4.13147	4.08819
Nup160	0.0515997	0.0019697	24	0	0.0652747	2.73146	2.74566	2.70752	2.666	2.7064	2.60802	2.57946	2.62187	2.72064	2.72684	2.75591
CG11874	0.149386	0.0243939	18	6	0.0653306	4.16046	4.16179	4.24057	4.16598	4.24393	4.11256	4.08531	4.05873	4.15358	4.13499	4.21811
kirre	0.192817	0.0466667	18	3	0.0653499	1.71596	1.65891	1.70913	1.71314	1.73749	1.59877	1.63617	1.60988	1.71605	1.72806	1.82863
Mrp4	0.149386	0.0243939	18	12	0.0653604	3.45797	3.52545	3.485	3.5627	3.483	3.61433	3.54326	3.64082	3.4776	3.44655	3.45941
Cog3	0.108914	0.0118182	24	3	0.0653703	3.90044	3.92587	3.84059	3.8185	3.81257	3.71685	3.71091	3.75531	3.76554	3.83251	3.82566
Reps	0.192817	0.0466667	18	6	0.065433	3.81086	3.87442	3.90556	3.80165	3.92272	3.75801	3.68721	3.77869	3.89005	3.81375	3.88715
Drep-4	0.149386	0.0243939	18	6	0.0654838	3.24153	3.23269	3.29759	3.27367	3.32528	3.14885	3.21849	3.15764	3.29405	3.23776	3.38658
CG3925	0.0515997	0.0019697	24	0	0.0654998	4.36955	4.45136	4.36232	4.34524	4.33111	4.30642	4.28082	4.23716	4.36691	4.37947	4.44626
pk	0.0763085	0.00515152	24	3	0.0655767	2.10472	2.14605	2.04508	2.02908	1.97764	1.93385	1.91605	1.93883	1.98911	1.99918	1.97957
CG10584	0.108914	0.0118182	24	3	0.0656845	4.02363	4.01575	3.96863	3.95637	3.9452	3.91709	3.91348	3.75828	3.86097	3.91078	3.9303
Dscam3	0.192817	0.0466667	18	3	0.0657319	2.35136	2.39489	2.36991	2.29072	2.36152	2.25815	2.14585	2.30079	2.423	2.35646	2.57111
[truncated: 1,776 more rows]
