# Supplementary material for: Circadian gene variants and the skeletal muscle circadian clock contribute to the evolutionary divergence in longevity across Drosophila populations
Source: HighWire-hosted journal article supplement (doi:10.1101/gr.246884.118), 2019-06-27
Supplement: Supplemental_Table_S11.xlsx [file Supplemental_Table_S11.xlsx]

## Sheet: legend
Supplemental Table S11
Gene list used for hub analysis (Fig. 4F)

## Sheet: Sheet1
gene	link_count	Avg_abs_rho	negative_rho_count	negative_percent
CG33514	459	0.835583	149	32.46
CG9509	444	0.837707	145	32.66
CG9903	444	0.841223	142	31.98
Tig	438	0.847794	283	64.61
CheA7a	434	0.834302	152	35.02
Diedel3	434	0.847888	151	34.79
CG30411	433	0.823123	134	30.95
CG5107	431	0.844111	155	35.96
CG12963	430	0.823146	131	30.47
Fem-1	429	0.845767	279	65.03
CG15202	425	0.848495	155	36.47
Cec-Psi1	424	0.848985	271	63.92
CG13833	424	0.855292	165	38.92
CG13215	423	0.859879	257	60.76
cln3	422	0.843736	149	35.31
NaPi-T	422	0.81003	133	31.52
Oatp33Ea	421	0.809394	135	32.07
CG11300	420	0.832583	268	63.81
CG3270	418	0.832404	133	31.82
CG31957	417	0.836451	260	62.35
cype	417	0.847941	153	36.69
CecB	416	0.846832	256	61.54
Jon99Ci	414	0.831423	153	36.96
CG17664	414	0.804609	127	30.68
CG9512	413	0.828078	151	36.56
CG6290	413	0.813808	144	34.87
CG18540	412	0.810911	149	36.17
CG12158	411	0.846783	152	36.98
CG9231	411	0.856813	162	39.42
st	410	0.80135	130	31.71
CG6465	409	0.835457	141	34.47
CG6043	409	0.846673	265	64.79
CG13428	408	0.836285	152	37.25
Tsf3	407	0.847664	246	60.44
CG4496	407	0.855044	246	60.44
Ugt86Dh	407	0.808376	138	33.91
CG7296	406	0.810587	247	60.84
CG30031	406	0.825741	149	36.7
CG30025	406	0.831128	151	37.19
CG11368	405	0.843861	154	38.02
CG31104	405	0.83176	143	35.31
CG15239	404	0.839198	251	62.13
CG11370	403	0.842406	252	62.53
CG14207	402	0.842687	254	63.18
CG11407	402	0.817021	148	36.82
LysD	402	0.851655	155	38.56
CheA84a	400	0.839996	154	38.5
CG9140	399	0.837984	149	37.34
CG6000	399	0.850407	153	38.35
CG14277	399	0.832556	150	37.59
CG3739	398	0.824744	135	33.92
CG3868	398	0.804855	116	29.15
deltaTry	398	0.830498	149	37.44
CG5527	397	0.838139	242	60.96
CG14688	397	0.825804	260	65.49
CheA75a	397	0.842909	151	38.04
CG5945	396	0.827171	149	37.63
Tsp42Eh	396	0.858402	245	61.87
gammaTry	395	0.818438	144	36.46
CG31106	395	0.823272	131	33.16
CG9034	394	0.848797	162	41.12
Npc2h	393	0.842788	155	39.44
CG14259	393	0.83755	159	40.46
Obp56g	393	0.834041	151	38.42
CG11425	393	0.846384	229	58.27
Cpr49Ac	392	0.845278	239	60.97
l(3)87Df	391	0.840954	154	39.39
sxe2	391	0.848339	159	40.66
CG14757	390	0.838575	137	35.13
CG7724	389	0.839424	152	39.07
Mdr50	389	0.801673	134	34.45
Cpr97Eb	388	0.833354	150	38.66
CG10918	388	0.836474	225	57.99
CG14285	388	0.856616	234	60.31
CG10345	388	0.838673	158	40.72
nimB3	387	0.83843	227	58.66
HDAC4	387	0.855769	225	58.14
CG8369	387	0.824219	243	62.79
nimB1	386	0.838672	232	60.1
CG17633	385	0.848315	145	37.66
CG9733	385	0.818611	229	59.48
CG11149	385	0.807687	97	25.19
dro4	385	0.843181	164	42.6
CG34265	385	0.840571	226	58.7
CG8560	384	0.83311	145	37.76
CheB42c	384	0.82922	149	38.8
CG10732	383	0.864544	226	59.01
CG1315	383	0.823988	95	24.8
CG13641	383	0.836589	227	59.27
SdhC	382	0.864575	162	42.41
Ance	382	0.805341	107	28.01
CG8112	382	0.843365	150	39.27
Cyp6t1	381	0.816552	149	39.11
CG33966	381	0.800561	107	28.08
GstE3	380	0.823701	128	33.68
fon	379	0.83962	218	57.52
RFeSP	379	0.856842	167	44.06
CG7712	379	0.85497	161	42.48
IM2	378	0.845859	219	57.94
CG30049	377	0.830778	110	29.18
TwdlT	376	0.838054	218	57.98
pot	376	0.859318	213	56.65
CG11470	376	0.829107	225	59.84
CG9153	375	0.837046	220	58.67
CG33965	375	0.830253	141	37.6
l(3)neo43	375	0.837379	152	40.53
Men-b	375	0.854069	155	41.33
CG18563	374	0.833099	215	57.49
Neurochondrin	374	0.869318	215	57.49
Nc73EF	374	0.865652	158	42.25
mRpL23	372	0.836849	154	41.4
CG15434	371	0.867526	158	42.59
l(2)k14505	370	0.835142	127	34.32
CG5500	367	0.849451	164	44.69
CS-2	367	0.819343	100	27.25
CG18302	366	0.830268	144	39.34
Pros54	366	0.866012	212	57.92
CG4839	366	0.814785	122	33.33
Wnt2	366	0.857459	205	56.01
CG11035	365	0.836352	135	36.99
l(1)G0136	365	0.833466	147	40.27
mei-P22	364	0.839889	215	59.07
CG12112	363	0.84847	198	54.55
Gal	363	0.804002	99	27.27
blp	363	0.828921	143	39.39
IM23	363	0.836579	221	60.88
smp-30	362	0.836713	115	31.77
CG31076	362	0.830895	115	31.77
kappaTry	362	0.804258	94	25.97
CG43202	361	0.828909	220	60.94
CG15445	361	0.862735	206	57.06
CG14607	361	0.842834	154	42.66
CG4169	360	0.871134	158	43.89
LysB	360	0.843202	153	42.5
CR43699	359	0.868667	204	56.82
Spn88Eb	359	0.850249	199	55.43
CheB42b	359	0.810384	144	40.11
CG10513	359	0.825488	146	40.67
CG10237	358	0.803388	131	36.59
CG16898	358	0.830309	125	34.92
Cyp6a21	358	0.81091	138	38.55
CG30091	357	0.841589	211	59.1
IM1	357	0.837327	209	58.54
Mdr49	357	0.817751	118	33.05
CG4462	356	0.85514	147	41.29
IM3	356	0.846944	206	57.87
CG32483	356	0.807247	136	38.2
Obp19b	355	0.823771	131	36.9
CecA2	355	0.812024	204	57.46
CG31373	355	0.811213	97	27.32
CG12400	354	0.859469	161	45.48
CG10205	354	0.840988	190	53.67
CG6361	353	0.860998	198	56.09
Skeletor	353	0.863842	197	55.81
PGRP-SD	352	0.849993	205	58.24
CG14298	351	0.807262	230	65.53
Ugt35b	351	0.824806	140	39.89
CG9921	350	0.839474	111	31.71
CG30466	350	0.823193	201	57.43
CG9259	350	0.827323	143	40.86
MtnC	349	0.801226	128	36.68
Ect3	349	0.83693	204	58.45
PGRP-SA	349	0.849467	187	53.58
CG6639	349	0.810283	203	58.17
CG41128	348	0.849663	153	43.97
viaf	347	0.868527	190	54.76
CG17751	347	0.805101	129	37.18
KCNQ	346	0.832226	104	30.06
tRNA:CR31576	345	0.822587	194	56.23
CG10320	345	0.841978	154	44.64
CG5290	344	0.865677	187	54.36
CecA1	342	0.825806	192	56.14
CG7298	341	0.829265	188	55.13
SdhB	341	0.860748	155	45.45
Cyp9b2	341	0.814193	91	26.69
CG10553	341	0.81043	141	41.35
CG18067	341	0.847216	194	56.89
CG8303	340	0.857024	185	54.41
IM10	340	0.842142	198	58.24
Rel	339	0.857817	181	53.39
CG15546	339	0.827186	188	55.46
CG33470	339	0.841687	197	58.11
Cyp305a1	338	0.847711	144	42.6
CG14191	338	0.846298	190	56.21
CG14265	338	0.835963	195	57.69
CG2157	337	0.851999	183	54.3
AttB	337	0.841029	184	54.6
Jon99Cii	336	0.830877	143	42.56
CG17928	336	0.828152	124	36.9
CG16986	336	0.806062	91	27.08
CG15199	336	0.811161	113	33.63
CG15408	335	0.829611	97	28.96
capt	335	0.867726	177	52.84
snoRNA:Psi28S-3305a	335	0.805449	212	63.28
CecC	333	0.824245	183	54.95
CG4068	333	0.860909	179	53.75
Hsp23	332	0.832863	184	55.42
Cyp6a17	332	0.822997	109	32.83
CG11592	331	0.823451	174	52.57
salt	331	0.808064	137	41.39
CG13077	330	0.857449	175	53.03
CG13422	330	0.829454	191	57.88
EndoGI	330	0.867159	174	52.73
CG14275	329	0.820079	118	35.87
CG15263	329	0.822019	99	30.09
Listericin	328	0.849683	172	52.44
CG30415	328	0.86355	154	46.95
CG3604	328	0.865746	174	53.05
CG32444	328	0.816914	102	31.1
CG11241	328	0.82674	106	32.32
CoVIIc	327	0.859477	157	48.01
eIF-2beta	326	0.850781	166	50.92
Irc	326	0.846493	171	52.45
CG10467	325	0.817037	70	21.54
Anxb11	325	0.866609	172	52.92
CR43920	325	0.815899	178	54.77
Zip3	323	0.854078	173	53.56
CG3214	322	0.854346	156	48.45
CG16749	322	0.802835	107	33.23
TepII	321	0.853248	167	52.02
l(2)efl	321	0.835679	176	54.83
snoRNA:Psi28S-3405a	320	0.816636	204	63.75
Tcp-1eta	320	0.86573	167	52.19
CG14898	319	0.822681	120	37.62
CG9989	319	0.851562	166	52.04
CG4769	318	0.865973	156	49.06
CG17107	318	0.806163	174	54.72
Jon99Ciii	318	0.82679	140	44.03
CG5011	318	0.800434	71	22.33
CG43236	318	0.836323	177	55.66
unpg	317	0.83362	176	55.52
Neb-cGP	317	0.852973	158	49.84
CR43698	315	0.867421	165	52.38
Phk-3	314	0.851136	161	51.27
Jon74E	314	0.824459	143	45.54
Rpn1	314	0.85945	162	51.59
CG3560	312	0.859022	156	50
PGRP-LB	312	0.848143	160	51.28
CG11752	312	0.862826	156	50
CG15353	312	0.846872	152	48.72
Cyp4d20	311	0.815584	114	36.66
CG14160	311	0.808207	71	22.83
Map205	311	0.853431	168	54.02
CG13018	311	0.820446	120	38.59
CG4497	310	0.809165	220	70.97
CG9759	310	0.836569	170	54.84
LysP	309	0.826943	105	33.98
CG6028	308	0.822689	73	23.7
CG6574	307	0.815458	196	63.84
Cpr62Bb	307	0.830972	212	69.06
edin	306	0.819484	161	52.61
Mipp1	305	0.839127	140	45.9
levy	305	0.859433	154	50.49
abba	304	0.821832	230	75.66
Aats-glupro	304	0.852479	161	52.96
proPO-A1	303	0.823746	138	45.54
CG15065	302	0.821679	166	54.97
CG17028	302	0.807525	52	17.22
CG2187	301	0.815023	134	44.52
ox	300	0.855175	152	50.67
Def	299	0.849753	156	52.17
CG14502	298	0.821876	69	23.15
CG6125	296	0.816541	96	32.43
CG30289	296	0.857477	145	48.99
CG31075	296	0.825165	90	30.41
CG13779	295	0.8545	149	50.51
CG10514	293	0.81456	132	45.05
betaTub60D	293	0.854627	143	48.81
Alr	293	0.832981	148	50.51
CG33301	292	0.802153	53	18.15
Gld	290	0.856171	138	47.59
CG12766	290	0.809829	57	19.66
CG42249	290	0.803188	58	20
CG4377	287	0.815549	62	21.6
Act57B	286	0.84209	147	51.4
CG31300	284	0.81965	48	16.9
CG3609	284	0.80849	70	24.65
Pros45	281	0.854113	138	49.11
CoIV	280	0.859022	148	52.86
Acon	280	0.864392	148	52.86
CG9172	280	0.826717	78	27.86
Oscp	279	0.855281	151	54.12
Spn6	279	0.855994	130	46.59
Ugt86Dd	279	0.816385	59	21.15
Cct5	278	0.860002	131	47.12
CG16713	278	0.821241	144	51.8
Ttc19	277	0.819588	72	25.99
Cctgamma	276	0.857829	126	45.65
CoVIII	276	0.855699	148	53.62
Tcp-1zeta	276	0.86263	129	46.74
CG10170	275	0.804529	44	16
CG34172	274	0.854417	146	53.28
SdhA	273	0.861171	147	53.85
CG30373	272	0.823452	70	25.74
vnd	272	0.800356	40	14.71
ATPsyn-Cf6	272	0.858414	147	54.04
tobi	271	0.827632	56	20.66
fln	271	0.846286	149	54.98
Mal-A6	268	0.808012	54	20.15
CG10877	266	0.802	47	17.67
CheA86a	266	0.825922	72	27.07
Cpr49Aa	266	0.830184	124	46.62
Mal-A1	266	0.813988	47	17.67
Cyt-c-p	266	0.846332	147	55.26
CG18522	266	0.815343	43	16.17
CG3699	265	0.814223	52	19.62
CG17752	265	0.806395	124	46.79
Rpn3	263	0.847565	121	46.01
CG31674	263	0.822571	62	23.57
CG4653	263	0.810299	60	22.81
snoRNA:U3:54Aa	260	0.825345	129	49.62
CheB38c	260	0.806095	127	48.85
CG7033	260	0.855959	117	45
CheB42a	260	0.801508	53	20.38
CG7580	257	0.847426	142	55.25
CG1681	257	0.821496	52	20.23
CG7759	255	0.805532	214	83.92
CG34040	254	0.818741	51	20.08
CG12171	254	0.824418	43	16.93
CG8818	252	0.826924	71	28.17
CG15152	251	0.80829	43	17.13
ND23	250	0.82917	56	22.4
CG15120	249	0.821964	66	26.51
CG14407	248	0.826099	61	24.6
Jheh1	248	0.809309	70	28.23
CG6972	247	0.840027	111	44.94
CG17264	246	0.805413	102	41.46
CG4363	246	0.80098	42	17.07
CG14545	246	0.839882	120	48.78
ple	245	0.815768	185	75.51
CG14567	245	0.819107	124	50.61
CG32551	245	0.805292	49	20
PO45	244	0.817511	119	48.77
CG11878	238	0.804501	45	18.91
CG3734	238	0.816107	40	16.81
IM4	237	0.824712	119	50.21
CG9331	237	0.807635	59	24.89
CG6484	236	0.805028	42	17.8
CG43349	234	0.802944	27	11.54
IM14	233	0.807921	119	51.07
CG11892	229	0.821602	116	50.66
Sclp	228	0.820186	163	71.49
Tsp42Eq	221	0.811105	30	13.57
CG11321	221	0.817139	179	81
Mur18B	218	0.800039	30	13.76
CG7881	217	0.801489	29	13.36
Iris	217	0.827903	57	26.27
CG31266	215	0.80153	64	29.77
CG2930	215	0.811657	40	18.6
zetaTry	214	0.801188	65	30.37
CG2556	213	0.810802	23	10.8
Mal-A2	213	0.80973	22	10.33
CG34150	210	0.814399	40	19.05
unc-45	210	0.837342	97	46.19
yip7	205	0.800026	103	50.24
CG4213	205	0.806316	172	83.9
Cyp28d1	204	0.819736	45	22.06
CG15739	203	0.815818	35	17.24
CG5840	202	0.822523	47	23.27
Cyp6a20	200	0.800408	78	39
CG34227	199	0.802262	90	45.23
CG32230	197	0.827928	115	58.38
CG17224	194	0.801111	61	31.44
CG13623	194	0.828209	42	21.65
CG34215	194	0.811012	59	30.41
CG13012	193	0.804652	122	63.21
CG18547	193	0.809263	20	10.36
CG8562	189	0.812139	36	19.05
CG10814	187	0.801065	77	41.18
CG31463	184	0.811073	37	20.11
CG31267	182	0.805258	48	26.37
CG12825	181	0.802443	16	8.84
CG9673	179	0.835356	18	10.06
CG17475	175	0.814377	41	23.43
CR43459	173	0.80082	101	58.38
CG34355	172	0.812137	34	19.77
CG7992	170	0.811678	11	6.47
Myo61F	169	0.817042	4	2.37
CG18748	168	0.803184	6	3.57
etaTry	168	0.809648	10	5.95
CG33127	166	0.801785	23	13.86
mag	164	0.816467	38	23.17
Cyp309a1	163	0.811437	22	13.5
CG10116	162	0.812735	5	3.09
spheroide	156	0.831313	5	3.21
Cyp4e2	154	0.809186	25	16.23
CG18747	151	0.829208	4	2.65
CG30160	150	0.816663	7	4.67
Tsp42Eb	149	0.806872	6	4.03
CG9468	146	0.822185	24	16.44
CG15422	143	0.806393	7	4.9
Jon99Fii	142	0.803385	40	28.17
mRpS7	142	0.80597	22	15.49
CG11912	138	0.814049	26	18.84
mex1	137	0.811572	4	2.92
CG1809	136	0.825384	24	17.65
Tsp42Er	130	0.801983	7	5.38
CG13492	126	0.836549	2	1.59
CG33306	121	0.827853	15	12.4
Mal-A3	120	0.834613	6	5
veil	119	0.802241	2	1.68
CG15255	117	0.844196	5	4.27
Ag5r2	116	0.822477	17	14.66
PGRP-SC1a	112	0.802758	18	16.07
CG18173	112	0.823054	12	10.71
CG11911	111	0.823136	21	18.92
CG31343	108	0.832329	10	9.26
CG1246	105	0.808491	1	0.95
CG8774	103	0.831176	16	15.53
CG12057	102	0.812373	28	27.45
CG7542	94	0.801375	0	0
CG31198	93	0.841799	1	1.08
decay	91	0.808199	0	0
CG31233	89	0.839158	5	5.62
CG17571	84	0.837084	3	3.57
CG10472	84	0.836743	1	1.19
CG8773	76	0.830512	1	1.32
CG15533	72	0.81437	1	1.39
CG12262	71	0.804302	11	15.49
CG34198	52	0.806548	0	0
