# Supplementary material for: Circadian gene variants and the skeletal muscle circadian clock contribute to the evolutionary divergence in longevity across Drosophila populations
Source: HighWire-hosted journal article supplement (doi:10.1101/gr.246884.118), 2019-06-27
Supplement: Supplemental_Table_S12.xlsx [file Supplemental_Table_S12.xlsx]

## Sheet: legend
Supplemental Table S12
Additional primary data not reported in Supplemental Tables S1-S11.

## Sheet: Fig1A-B
days	0	2	4	6	8	10	12	14	16	18	20	22	24	26	28	30	32	34	36	38	40	42	44	46	48	50	52	54	56	58	60	62	64	66	68	70	72	74	76	78	80	82	84	86	88	90	92	94	96
B3			2			2		3	1	1		2	2	6	8	8	4	14	20	5	5	6	19	9	9	23	10	7	6	3	3	2
O1		2		1			1			2		1	2	1			1	3	2	2	1		1		3	4	3	2	7	6	10	8	4	18	17	21	20	21	20	15	15	10	17	18	6	4	3	1
O3			1		2	1		1				1	1	1		1	1	2	2		1	1	2		2	2	1	1	4	4	8	4	4	6	3	10	10	20	10	15	10	10	9	15	10	14	10	2	3
Not Climb
B3					12				18				49				55				60				38				7
O1					15				22				52				65				71				72				66				73				61				27				8
O3					8				17				44				62				74				71				77				68				40				25				27
Remain
B3	180	180	178	178	178	176	176	173	172	171	171	169	167	161	153	145	141	127	107	102	97	91	72	63	54	31	21	14	8	5	2	0	0	0	0	0	0	0	0	0	0	0	0	0	0	0	0	0	0
O1	273	271	271	270	270	270	269	269	269	267	267	266	264	263	263	263	262	259	257	255	254	254	253	253	250	246	243	241	234	228	218	210	206	188	171	150	130	109	89	74	59	49	32	14	8	4	1	0	0
O3	213	213	212	212	210	209	209	208	208	208	208	207	206	205	205	204	203	201	199	199	198	197	195	195	193	191	190	189	185	181	173	169	165	159	156	146	136	116	106	91	81	71	62	47	37	23	13	11	8
percent
B3	100	100	98.8889	98.8889	98.8889	97.7778	97.7778	96.1111	95.5556	95	95	93.8889	92.7778	89.4444	85	80.5556	78.3333	70.5556	59.4444	56.6667	53.8889	50.5556	40	35	30	17.2222	11.6667	7.77778	4.44444	2.77778	1.11111	0	0	0	0	0	0	0	0	0	0	0	0	0	0	0	0	0	0
O1	100	99.2674	99.2674	98.9011	98.9011	98.9011	98.5348	98.5348	98.5348	97.8022	97.8022	97.4359	96.7033	96.337	96.337	96.337	95.9707	94.8718	94.1392	93.4066	93.0403	93.0403	92.674	92.674	91.5751	90.1099	89.011	88.2784	85.7143	83.5165	79.8535	76.9231	75.4579	68.8645	62.6374	54.9451	47.619	39.9267	32.6007	27.1062	21.6117	17.9487	11.7216	5.12821	2.9304	1.4652	0.3663	0	0
O3	100	100	99.5305	99.5305	98.5915	98.1221	98.1221	97.6526	97.6526	97.6526	97.6526	97.1831	96.7136	96.2441	96.2441	95.7746	95.3052	94.3662	93.4272	93.4272	92.9577	92.4883	91.5493	91.5493	90.6103	89.6714	89.2019	88.7324	86.8545	84.9765	81.2207	79.3427	77.4648	74.6479	73.2394	68.5446	63.8498	54.4601	49.7653	42.723	38.0282	33.3333	29.108	22.0657	17.3709	10.7981	6.10329	5.16432	3.75587
percent not climb
B3					6.74157				10.4651				29.3413				39.0071				61.8557				70.3704				87.5
O1					5.55556				8.17844				19.697				24.8092				27.9528				28.8				28.2051				35.4369				46.9231				45.7627				100
O3					3.80952				8.17308				21.3592				30.5419				37.3737				36.7876				41.6216				41.2121				29.4118				30.8642				72.973				100
	0	8	16	24	32	40	48	56	64	72	80	88	96
B3	0	6.74157	10.4651	29.3413	39.0071	61.8557	70.3704	87.5
O1	0	5.55556	8.17844	19.697	24.8092	27.9528	28.8	28.2051	35.4369	46.9231	45.7627	100
O3	0	3.80952	8.17308	21.3592	30.5419	37.3737	36.7876	41.6216	41.2121	29.4118	30.8642	72.973	100
[truncated: 13 more columns]

## Sheet: Fig1C-D
average activity recordings of groups of 10 flies
1 week old				6 weeks old
B3 average	O1 average	O3 average		B3 average	O1 average	O3 average
477	585.6	801.3		288.9	323.8	125.667
115.9	252.1	335.1		497.5	389.1	131.417
41.3	65.8	55.5		578.7	529.8	113.417
31.2	38.8	16.4		565.3	672.2	109.667
38	10.7	41.6		604.2	836.7	91.9167
61.2	19.6	31.5		584.2	866.8	90.75
46.7	18.3	51		559.8	868.5	115.583
50.4	40.2	73.7		581.8	883.1	109.083
43.9	14.2	49.3		576.1	844	122.5
103.9	42	74.1		808.2	930.4	134.417
79.1	26.9	43.9		910.4	1046.4	138.833
72.2	30.7	56.9		916	1009.2	194.083
101	29.2	31.4		942.6	1025.2	173.417
97.7	33.8	14.5		940.5	1034.1	199.667
90.6	60.2	23.5		931.8	1046.8	210.5
92.6	50.3	26		949.8	1023.1	197.083
86.5	55	52.9		974.2	1018.8	215.75
108.6	75.4	46.8		1021.3	1037.8	250.25
132.8	69	60.1		1017.3	1033.5	258.417
138.9	60.4	109		1023	1060.2	218.75
125.9	48.6	114.4		967.2	1002.6	264.25
149.5	84.8	122.5		976.9	1025.7	268.5
120.3	97.2	157.9		1054.5	1020.5	259.333
126.9	107.6	129.4		1017	1034.8	262.667
189.4	111.5	120		1006.6	1044.7	297.583
203.1	103.3	161.4		1031.2	1039.7	348.25
156.9	102.7	148.1		1057.5	1040.8	309.333
206.1	101	170.4		1049	1023.4	318.417
137.7	169.9	161.1		1064	990.2	272
156.8	168.6	156.8		1046.6	970.4	246.417
191.4	100.6	140.1		1019.4	984.5	282.083
160.1	111.7	141.1		991.3	965.9	244.75
208.1	155.3	138.3		1024.1	979.2	240.417
201.7	239.1	156.1		1028.7	986.3	257.167
160.5	266.4	183.5		1026.3	997.3	262.833
145.9	274.8	173.6		993.6	994.9	252.333
186.3	309.3	322.3		990.2	971.1	238.333
223.2	278.6	371		1024.3	1003.4	243.5
233.1	236.5	395.5		993.6	966.7	252.167
225.9	312.5	382.6		997.2	963.1	254.5
200.2	334.8	334.3		1036.9	945.8	243.167
184.1	393	373		1030	903.1	219.833
181.4	394.9	368.9		987.2	960.7	239.333
174.1	392.2	396.2		1011.9	942.2	217.083
253.1	468.1	439		992.5	938.8	240.167
355	492.3	479.4		996.9	900.9	226.583
310.3	542.9	485.6		977.4	947.8	234.917
355.5	569.8	433.4		940.2	900.3	239.417
329.4	533.4	484.9		972.4	852.4	229.917
391.5	542.3	494.1		957.2	882.1	213.667
538.6	579.2	553.4		943	865.9	240.75
746.5	721	830.3		936.6	887.9	227.25
668	674	805.4		954.9	891.5	223.25
629.4	573.3	747.3		905.4	871.5	252.5
659.4	477	622.4		908.8	838.1	237.583
562.9	402.7	581		877.4	883.5	223.583
572.4	328.6	513.9		890.6	904.6	208
549.5	287.5	497.4		817.4	864.7	172.667
642	267.5	436.2		873.3	844.3	197.5
680	200.2	415.6		864.7	841.7	218.583
718.9	175.1	386.6		860.2	825.5	175.833
709	164.1	355.7		877.5	856	182.75
658.3	204.1	384.2		849.9	846.8	197.833
585.7	151.3	292.2		856	858	208.333
610.9	163.2	275.1		814.5	838.9	239.583
678.5	193.1	298.2		823.3	805.9	253
674.5	194.1	322.1		855.5	824.8	298.583
643.4	266.4	320.6		844	862.3	290
644.6	310	377		797.9	849	266.5
593.4	394	475.5		851.1	760.8	265.167
548.6	471.8	441.3		862.8	739.8	313.25
586	491.5	515.4		865.8	796.7	297.167
603.5	514.3	523.7		867.1	867.3	322.917
663.9	536.7	548.9		857.1	866.7	301.5
640.7	584.5	581.2		866.1	867	304.333
737.3	534.5	664.3		875.7	815.9	295.917
687.9	497.2	693.1		872.5	783.6	310.583
678	508.3	600.5		895.3	854.7	280.833
689.6	491.8	543.2		877.6	820.9	295.75
705.9	492	551.5		871.9	846.9	298
722.5	516.9	604.1		892	843.7	301.167
750.6	524	655.3		792.1	812	216.5
746	513.7	659.9		637.1	588.6	139.583
673.3	595.8	629.7		495.9	391	106.25
688.2	570.6	611.2		376.5	199.3	51.3333
737.2	513.7	675		194.7	143.1	45.5
754	498.3	615.7		168.5	127.4	60.1667
678.2	496.7	584.3		178.9	114.7	57.5
626	435.3	636.4		109.1	58.1	59.1667
620.7	490.7	613.1		100.2	47.1	61.8333
600.5	540.2	586.2		97.8	22.1	68.4167
590.9	502.8	571.9		76	22.8	52.5833
566.8	456.6	619		34.1	21.1	59
613.2	428.7	667.7		30.8	12.2	40.3333
585.9	462.5	587.6		84.8	14.6	45.6667
568.8	424.6	496.3		33.3	13.2	37.75
516.1	469.4	555.7		46.6	42	53.25
544.2	489.5	486.7		48.6	25	56.1667
509.6	422.2	512		32.1	11.4	50.9167
443	417.4	422.9		38.2	9.9	44.25
432.4	406.4	447.6		22.8	46.1	46.5833
519.4	396.1	468.9		70.2	34.9	36.25
540.8	394.2	377.5		144.5	41.1	45.75
515.6	366.4	340.9		139.5	45.9	67.1667
522.2	330.6	359.7		164.7	34.9	60.0833
555.1	295.4	381.4		143.6	79.8	38.8333
516.5	282.1	380.2		172.2	41	35.75
519.3	255.4	395.9		94.9	27.7	30
563.6	205.6	383		94.4	36.8	46.1667
548.1	290.1	370		131.4	68.9	55.75
578.2	281.8	386.5		168.8	76.8	39
456.2	277.3	433.4		164.4	46.9	41.75
537.8	300.5	476		158	27	45.75
491.7	271.6	551.8		120.4	45.8	47.1667
540	238.3	518.1		108.7	65.5	33.5
618.5	242	476.3		131.4	79.8	38.3333
624.7	208.6	515		118	59.9	40.25
680.3	242.8	487.3		101.2	49.5	31.5833
680.3	242.8	487.3		113.1	28.6	33.9167
556	244.9	364.3		124.4	30.2	52.5833
632.3	406	451.1		103.3	36.6	61.9167
632.3	406	451.1		132.9	65.6	72.0833
401.3	337.7	253.8		126	94.9	50.4167
280.8	280.8	241.2		200.4	89.4	51.25
368.4	186.4	142.4		186.3	93.7	79.5
371.5	170.4	121.7		230.7	94.4	38.5
409.1	172.8	91.6		221.6	74.2	31.8333
393.2	137.3	102.8		148.4	77	59.25
371.1	170.2	102.2		212.8	91	48.0833
288.5	211.9	140.2		170.7	73.9	47.8333
245.2	169.1	115.8		159.3	60.3	49.5
243.7	139.6	135.3		136.8	71.1	29.9167
201.1	126.5	92.8		140.9	65.7	44.3333
249.7	127.3	87.8		205	64	49.9167
264.4	108.6	87.6		123.4	32.1	72.4167
261.4	78.1	103.5		120.5	59.2	78.5833
254.5	61.1	96.9		84.5	52.7	30.5
230.8	66.1	57.9		111.6	32.2	43.5833
230.2	82	60.3		164.4	49.1	41.4167
179.5	67	88.9		187.5	35.8	44.3333
207.3	61.8	66.5		156	55.9	40.3333
150.8	101.5	39.4		251.6	78.1	52.5
158.1	86.6	53.5		178.3	99	59
138.3	102.8	77.4		141.7	133.4	48.3333
136.2	91.7	72.9		158.1	158.5	55.9167
103.1	84.3	69.8		276.7	212.7	49.4167
104.7	58.8	47.4		275.3	271.3	81.75
115.5	72.1	76.2		311.1	296	72.0833
119.2	69.6	38.4		366.1	343.2	85.1667
153.2	50.5	47.3		503	489.7	112.5
151.3	52.1	49.8		513.1	568.6	118.083
122	63	25.9		522.6	607.3	114.417
153.2	54.2	27.4		665.4	648.2	105.583
96.9	58.4	50.6		926.3	832.2	146.75
134.3	47.2	76.9		906	915.5	152.083
138.6	67.6	51.5		840.1	902.6	157.833
126.5	63.4	106.5		859.2	894.6	125.5
113.7	43.3	46.4		775	846.8	115.833
104.8	42.2	36.3		714.9	845.7	102.083
105.3	42	43		697.6	806	95.5833
105.6	36.7	44.6		735	739.7	86.25
134.6	46.6	25.4		790.3	717	90.1667
133.8	50.4	19.2		711.4	736.7	141.583
121.2	53.3	85.4		755.7	701	152.25
130.8	63.6	47.6		679.5	640.4	171.167
130.8	49.7	47.2		745.4	631.1	149
108.3	39.3	23.9		792.5	619.1	143.333
145.8	34.8	28.9		768.5	686.5	163.083
120.1	55.5	65.2		737.6	646.6	130.75
98.3	61	51.5		793.9	628.2	130.417
80.9	40.3	51.6		851.7	613.1	151.917
98.5	34.9	62.1		803.3	606.9	186.417
135	41.2	41.3		800.6	592.3	146.917
110	40.4	49.4		815.7	598.6	142.167
55.3	50.5	57.9		828.4	647.3	155.75
61.3	46.7	70.3		824.1	660.6	178.583
81.3	46.2	64.2		856.4	630.2	157.167
131.2	65.9	57.8		865.3	640.7	163.5
114.2	49.2	61		819.8	661.5	185.167
90.5	64.8	44.3		863.6	719.9	181.5
133.6	64	60		815.8	698.7	201.583
84.9	85.6	85.6		823.7	704.3	221
164.1	75.7	66.9		814.4	717	212.667
119.9	103.5	94.2		796.9	723.7	193.5
100.3	109.5	133.7		776.4	687	178.833
131.8	144.1	156.5		773.1	702.8	182.667
111.9	176.7	205.9		786	660.8	211.583
115	198.3	189.4		790	666.5	230
105.3	254	229.5		771.3	677.2	214.25
92.1	283.9	235.2		785.4	648.6	187.333
169.7	402.6	293.2		793.6	652.8	160.833
206.6	470.1	294.3		801.5	673.1	130.833
167	464.5	322.7		761.6	684.7	145.417
161.3	508.1	359.6		779.7	649	160
257.7	601.6	442.2		746.3	651.4	157.25
485	714.5	698.1		735.4	657.4	183.25
447.1	696.7	730.1		738.8	599.3	225.333
443.3	588	680.8		744.7	600.1	227.083
442.7	536.6	646.6		756	594.7	198.167
507.2	492.3	577.1		699.7	553.3	197.667
508	403	486.8		745.7	517.1	184.083
527.7	346.3	454.7		712.7	518.7	157.333
490.3	310.2	411.9		696	569.6	162.917
524.3	205.1	412		717.9	459.9	154.667
489.7	179.8	346.4		725	468.4	161.25
461.1	188.6	286.8		707.5	490.8	151.333
580.2	195.3	310.8		682.2	479.7	149
651.4	149.1	279.2		683.8	546.5	206
629.3	149	263.4		702.2	553.4	216.333
646.9	178.9	269.4		708.8	541.8	201.25
644.5	140.5	301.6		699.9	573.7	166.417
703.2	190.4	315.1		676.6	568.8	166.5
717.4	217.4	386.7		683.4	633.3	181.5
667.4	204.6	347.4		636.3	675.9	193.917
647.2	258.9	304.3		611.5	663.8	171.583
632.5	303.5	345.5		655.6	614.8	161.25
638.2	390.5	406.5		670.8	562.1	163.417
633.2	401.3	438.4		665.4	579.6	136.083
603.8	394.1	469.2		686.4	557.1	164.833
640.7	368.6	418.7		684.1	577.2	192.75
666	429.2	438.4		712.6	581.1	208.75
575.1	429.5	491.8		741.9	567.3	246.833
555.9	461.5	514.2		714.1	611.5	229.25
632.6	406.7	518		705	621.2	228.667
669.2	441.6	538.1		755.7	666.2	186.167
686.1	447.9	510.5		696.1	634.9	169
751.2	483.1	526.8		516.6	475.6	110.667
717.7	508.6	536.9		426.5	325.3	131.75
713.2	485.9	563.7		250.2	250.1	119.583
745.8	437.2	526.2		166.7	199.8	69.0833
582.5	409.2	429.4		119.6	143	75.8333
557	458.8	471.9		130.5	66	57.25
532.6	473.8	438.1		139.1	63.1	44
601.7	475.4	457		126.3	70.8	48.1667
561.6	446.9	429.4		90.2	42.1	49.9167
509.4	473.9	400.8		64.8	52.2	59.0833
507.5	511.1	347.2		83.8	53.2	76.3333
557.5	364.7	401.8		113	33	74.4167
562.2	320.5	419.7		79.8	78.8	77.1667
553.7	267	398.2		63.7	86.9	64.75
512.6	280.1	469.9		61.1	84.1	50.6667
472.1	213.5	494.8		77	47.8	58.8333
536.9	218.4	393.5		62.4	74.1	58.3333
483.8	246.9	346.2		62	105.1	60.3333
474.4	281.2	421.3		62.1	76.6	64
590.9	274.2	408.5		44.5	52.4	63.25
545.3	250.7	423.2		34.9	63.8	80.5
449.6	193.7	427.6		44.2	62.1	74.6667
454.9	250.7	326		36.7	39.9	62.5833
411.2	253.7	350.4		39.5	38.7	47.25
499.3	262.5	368.4		55	23.6	30.9167
498.3	304.9	418.9		55.2	28.8	54
512.8	255	456.7		44.7	29.3	50.0833
548.6	223.7	527.3		107.6	62.9	27.4167
556.8	238.2	503.5		118.5	61.9	41.4167
458.3	275	497.7		57.7	46.3	47.0833
465.5	247	580.9		93.5	72.1	56.8333
459.6	298.1	605.3		159.2	37.5	43
536.3	410.5	586.4		160.3	74.5	46.0833
583.3	420.9	532.9		150.5	44.1	45.1667
590.5	357.1	539.2		107.2	66.4	51.4167
656.9	383	601.1		140.9	66.6	74.9167
626.8	348.4	593.1		104.8	66.3	87.5
632.5	291.5	566.7		75.9	17.1	69.6667
549.4	279.2	506.3		46.2	16.7	79.3333
553.5	211	486.7		38.9	31.1	69.5
573.9	230.8	406.1		36.6	21.4	58
247.1	238.6	329.1		51	39.2	50.0833
220.9	192.2	217.8		67.1	44.8	65.0833
216.9	149.8	168.6		51.5	66	71.0833
258.6	109.7	139.8		64	78	65.0833
207.9	111.5	88.8		53.5	51.3	66
218	57.6	84		79.3	40.8	60.75
258.3	91.6	55.4		58.6	73.5	85.1667
290.1	97.1	65.1
269.5	83.7	84
278.5	51.9	98.7
221.5	75.1	69.2
224.1	74.1	83.5
212	71.4	89.8
197.7	64.5	87.6
201	61.7	102.3
233.9	66.4	49.7
187.6	61.8	80.2
114.8	53.1	52.6
121.4	42.7	71.2
128.7	43.5	34.1
134	71.3	96
134.7	48.3	112.7
154.5	61.6	72.2
140.4	76	49.3
169.5	84.3	76.4
101	81.7	57.5
115.4	69.5	71
153.3	94.6	63.9
111.5	45.6	75.1
112.3	47.7	101.4
139.8	59.5	103.4
113.7	43.1	68.5
123.4	64.7	59.7
85.1	74.4	84.3
150.1	51.6	48.7
114.9	47.8	66.6
99.4	72.9	72.3
65.7	33.8	45.7
126.3	54.4	107
117.4	29.4	159.3
115.8	50.9	64.2
117.2	46.7	44.7
119.6	47.6	58.9
82.8	45.2	68.2
66.6	39.7	76.9
107.4	64.3	47.7
71.1	42.4	46
77.2	57.1	45.3
69.9	51.4	71.1
98.4	28	53.3
131.9	45	53.4
130.8	42	102.8
78.7	36.4	67.2
83.8	54.8	92.8
153.5	88.1	111.6

## Sheet: Fig1E-G
JUMP ASSAY data
	n=25
	1wk old			6wk old
	line-B3	Line-01	line-03	line-B3	Line-01	line-03
average	5.712	5.537	4.856	2.18	4.995	4.584
SEM	0.287723	0.385336	0.345913	0.168197	0.298648	0.31437
NORMALIZED JUMP ASSAY data
	n=25
	1wk old			6wk old
	line-B3	Line-01	line-03	line-B3	Line-01	line-03
average	1	0.969363	0.85014	0.381653	0.874475	0.802521
SEM	0.0503717	0.0674607	0.0605589	0.0294463	0.0522844	0.0550367
FLIGHT ASSAY data
	n=25
	1wk old			6wk old
	line-B3	Line-01	line-03	line-B3	Line-01	line-03
% upward	41.5842	53.4653	37.2549	3.9604	26	27.451
% horizontal	56.4356	43.5644	54.902	3.9604	37	32.3529
% downward	1.9802	2.9703	7.84314	41.5842	29	37.2549
% no flight	0	0	0	50.495	8	2.94118
number of flies	101	101	102	101	100	102
Flight index	4.79208	5.0099	4.58824	1.22772	3.62	3.68627
SD	1.06129	1.11799	1.2134	1.49587	1.83556	1.72908
SE	0.105602	0.111244	0.120144	0.148845	0.183556	0.171204

## Sheet: Fig2A
	1wk																6wks
B3	114524	118243	122140	111999	110170	138610	137219	120450	120053	112766	121138	137483	132300	118335	157277	121541	99602	107130	113331	119199	105293	139382	115692	89411	118457	125813
O1	116871	177261	129094	141146	147863	108115	120770	134770	156152	134248							109951	92347	113105	96890	117453	113112	79208	134219	124000
O3	143725	182829	169351	146129	155276	107151	120279	131787	152777	101367	126598	119559	102453	136773			94081	129873	111227	131736	97888	87623	90070	116038	121235	97770	89968	83843

## Sheet: Fig2C
	1	3	6	weeks old			1	3	6	weeks old			1	3	6	weeks old
	channel 2
	B3						O1						O3
	normalized average (number of particles/tissue area)						normalized average (number of particles/tissue area)						normalized average (number of particles/tissue area)
	1	2.57226	4.59811	average			0.178066	0.254897	0.579599	average			0.230215	0.251178	0.399624	average
	0.314788	0.306789	0.40524	sem			0.0241142	0.0243908	0.149219	sem			0.0634251	0.0548264	0.0326251	sem
	normalized average (total area of particles/tissue area)						normalized average (number of particles/tissue area)						normalized average (number of particles/tissue area)
	1	2.96782	5.03633	average			0.300074	0.49395	1.15568	average			0.299192	0.490782	0.804075	average
	0.303668	0.304253	0.438854	sem			0.0456802	0.0595903	0.318865	sem			0.0420954	0.11061	0.0536783	sem
	p62/Ref(2)P staining							p62/Ref(2)P staining
	normalized average (number of particles/tissue area)							normalized average (total area of particles/tissue area)
	channel 3
	B3						O1						O3
	normalized average (number of particles/tissue area)						normalized average (number of particles/tissue area)						normalized average (number of particles/tissue area)
	1	1.58888	2.00122				0.218819	0.312661	0.60915				0.157934	0.311146	0.459763
	0.286425	0.166003	0.142177				0.0251439	0.0306821	0.125286				0.0318141	0.0565625	0.0429969
	normalized average (total area of particles/tissue area)						normalized average (total area of particles/tissue area)						normalized average (total area of particles/tissue area)
	1	1.48546	2.42478				0.438847	0.609005	0.919538				0.267318	0.565574	0.773866
	0.236219	0.0969786	0.144043				0.0702364	0.0823164	0.179137				0.0869231	0.123067	0.0743524

## Sheet: Fig3B
	B3	O1	O3
1	883067	906926	926563
2	64099	33273	63557
3	18942	16336	17659
4	13115	11683	11868
5	6868	6275	6354
6	8497	7171	7697
7	4917	4237	4569
8	4825	4044	4359
9	3359	2783	3027
10	2536	2123	2261
11	1152	1163	1176
12	1688	1781	1824
13	776	873	888
14	866	964	978
15	725	784	773
16	761	812	845
17	448	511	503
18	574	649	635
19	338	352	365
20	404	447	435
21	372	385	387
22	288	285	291
23	228	260	279
24	289	281	312
25	196	221	205
26	182	176	189
27	184	202	216
28	189	204	208
29	155	169	174
30	184	179	186
31	165	153	170
32	128	147	153
33	133	153	140
34	125	132	148
35	105	118	131
36	93	105	114
37	80	92	80
38	76	88	103
39	60	77	69
40	65	63	74
41	59	70	80
42	52	50	61
43	44	52	50
44	44	40	46
45	54	55	55
46	33	37	42
47	30	27	34
48	41	43	43
49	37	31	31
50	24	26	24
51	23	23	30
52	23	27	21
53	20	21	14
54	22	21	21
55	26	23	25
56	27	21	26
57	22	22	22
58	22	21	24
59	15	17	17
60	25	21	24
61	17	13	14
62	15	15	11
63	17	16	14
64	14	17	14
65	19	17	18
66	14	15	8
67	11	22	13
68	17	21	18
69	12	16	21
70	8	15	8
71	18	12	15
72	11	18	19
73	13	15	19
74	14	17	20
75	10	12	13
76	17	15	17
77	18	15	8
78	10	8	12
79	24	19	23
80	20	14	18
81	14	14	19
82	14	15	7
83	21	20	26
84	17	14	21
85	17	15	20
86	20	13	22
87	11	14	18
88	18	19	14
89	13	13	15
90	16	20	23
91	18	12	14
92	10	7	17
93	12	10	19
94	18	16	10
95	10	8	8
96	7	11	12
97	5	2	3
98	18	22	16
99	25	20	14
100	19	17	11
101	9	3	7
102	10	11	10
103	3	5	9
104	4	4	7
105	15	8	8
106	14	8	14
107	16	10	7
108	16	10	7
109	18	5	14
110	11	9	9
111	10	7	10
112	6	5	5
113	5	1	4
114	8	11	9
115	4	2	3
116	5	9	8
117	7	6	7
118	15	10	9
119	1	5	12
120	8	8	11
121	4	9	9
122	4	7	2
123	9	4	3
124	11	13	10
125	10	12	12
126	13	8	16
127	10	5	9
128	4	8	6
129	5	5	4
130	3	5	10
131	4	9	11
132	4	6	8
133	11	4	13
134	3	3	4
135	10	9	9
136	7	13	8
137	9	13	9
138	7	8	10
139	7	10	12
140	10	9	5
141	5	2	2
142	8	7	9
143	11	8	4
144	9	4	9
145	10	10	11
146	15	10	8
147	10	8	9
148	6	9	4
149	9	9	6
150	5	10	6
151	8	6	8
152	7	7	6
153	6	2	7
154	6	2	3
155	4	10	7
156	7	4	4
157	7	12	2
158	2	11	5
159	7	7	3
160	4	5	5
161	5	13	7
162	6	4	5
163	17	13	7
164	9	3	2
165	4	4	2
166	6	4	4
167	3	4	2
168	3	3	5
169	3	5	5
170	4	0	4
171	2	4	5
172	3	1	2
173	4	2	8
174	4	5	8
175	4	6	3
176	1	2	3
177	4	2	3
178	4	4	2
179	5	1	4
180	3	2	2
181	5	1	4
182	2	3	3
183	4	2	4
184	3	4	1
185	10	6	9
186	14	8	15
187	3	5	3
188	5	3	1
189	1	2	4
190	4	3	3
191	3	3	2
192	1	2	4
193	2	4	3
194	1	2	2
195	1	4	1
196	1	2	0
197	3	5	5
198	3	2	5
199	2	4	2
200	7	4	5
201	6	2	4
202	2	1	3
203	1	2	1
204	4	2	3
205	1	0	1
206	2	0	2
207	0	3	2
208	2	1	1
209	2	4	3
210	1	1	2
211	1	5	3
212	2	2	3
213	2	3	2
214	0	1	1
215	1	1	1
216	0	2	3
217	2	2	3
218	2	4	3
219	2	2	3
220	2	1	3
221	4	6	6
222	3	1	1
223	3	3	2
224	1	0	1
225	1	2	0
226	2	0	0
227	1	0	1
228	3	3	2
229	1	1	0
230	4	3	1
231	1	1	1
232	1	1	0
233	3	2	1
234	3	2	0
235	1	1	2
236	1	2	2
237	1	1	0
238	3	3	4
239	2	0	1
240	2	3	1
241	1	2	1
242	1	1	0
244	4	1	2
245	2	2	3
246	1	2	3
247	2	1	1
248	2	0	1
249	1	2	2
250	2	3	4
251	1	3	3
252	1	1	1
253	1	1	1
254	2	1	2
255	2	2	2
256	1	1	2
257	1	0	0
258	1	0	0
259	0	3	3
260	2	1	1
261	3	2	1
262	2	1	2
263	1	2	2
264	1	2	2
265	2	2	3
266	0	0	1
267	4	5	5
268	0	0	2
269	2	0	0
270	3	2	2
272	1	3	2
273	1	0	1
274	1	0	0
275	1	2	0
276	0	2	1
277	2	3	1
278	2	1	1
279	0	1	2
280	2	2	2
281	3	5	2
282	0	1	1
283	2	2	1
284	1	3	3
285	2	4	2
286	4	2	2
287	1	3	3
288	1	1	0
290	0	2	2
291	2	2	3
292	0	1	0
293	0	0	1
294	2	0	2
295	1	0	2
296	1	1	0
297	2	1	2
298	1	1	0
299	3	2	1
300	1	0	2
301	0	0	1
304	1	3	2
305	2	1	2
306	1	1	1
307	1	4	4
308	1	2	2
309	1	2	1
310	1	1	0
312	3	0	2
313	1	2	2
314	1	2	2
315	1	0	0
316	0	1	0
317	1	0	0
318	1	0	1
319	0	1	2
320	2	3	0
321	1	1	1
322	1	1	1
323	0	1	0
324	3	0	1
325	0	2	1
326	2	2	2
327	1	1	0
328	1	2	1
329	1	1	3
330	2	1	2
331	0	1	2
332	2	2	1
333	2	2	0
337	1	1	2
338	3	0	0
339	2	1	1
341	1	1	2
342	1	0	0
343	1	2	0
344	2	3	1
345	0	0	1
346	2	3	0
347	1	2	1
348	3	1	1
351	0	1	0
352	1	0	0
353	1	2	1
354	0	1	1
355	2	1	0
356	2	3	2
357	2	0	1
358	2	1	1
359	1	1	1
361	1	2	2
362	0	1	1
363	2	3	1
365	0	1	0
367	0	1	1
368	1	2	2
370	1	0	0
371	6	5	4
372	4	5	3
373	0	1	0
374	0	1	0
375	2	0	0
376	2	0	1
377	0	1	1
379	1	1	3
381	1	2	3
382	0	0	1
383	1	2	1
385	0	1	0
386	1	0	0
388	3	2	2
390	1	0	2
391	1	0	0
392	2	1	1
393	0	1	1
394	1	0	1
397	3	2	1
399	1	1	0
400	0	1	1
405	3	0	0

## Sheet: Fig3D
dist	freq
-10	286
-9.99	309
-9.98	316
-9.97	284
-9.96	260
-9.95	343
-9.94	320
-9.93	309
-9.92	306
-9.91	258
-9.9	296
-9.89	326
-9.88	285
-9.87	282
-9.86	317
-9.85	334
-9.84	344
-9.83	300
-9.82	332
-9.81	271
-9.8	324
-9.79	303
-9.78	298
-9.77	337
-9.76	298
-9.75	307
-9.74	309
-9.73	307
-9.72	309
-9.71	293
-9.7	302
-9.69	318
-9.68	287
-9.67	300
-9.66	324
-9.65	273
-9.64	280
-9.63	324
-9.62	294
-9.61	340
-9.6	277
-9.59	330
-9.58	310
-9.57	314
-9.56	328
-9.55	292
-9.54	318
-9.53	308
-9.52	312
-9.51	371
-9.5	325
-9.49	295
-9.48	322
-9.47	292
-9.46	327
-9.45	330
-9.44	325
-9.43	332
-9.42	317
-9.41	296
-9.4	301
-9.39	311
-9.38	310
-9.37	290
-9.36	307
-9.35	275
-9.34	305
-9.33	291
-9.32	293
-9.31	307
-9.3	278
-9.29	332
-9.28	320
-9.27	292
-9.26	309
-9.25	344
-9.24	293
-9.23	299
-9.22	310
-9.21	295
-9.2	320
-9.19	330
-9.18	316
-9.17	305
-9.16	305
-9.15	332
-9.14	295
-9.13	314
-9.12	310
-9.11	326
-9.1	325
-9.09	280
-9.08	321
-9.07	298
-9.06	324
-9.05	304
-9.04	320
-9.03	327
-9.02	283
-9.01	309
-9	329
-8.99	333
-8.98	301
-8.97	320
-8.96	318
-8.95	323
-8.94	330
-8.93	287
-8.92	291
-8.91	325
-8.9	328
-8.89	319
-8.88	312
-8.87	289
-8.86	317
-8.85	315
-8.84	310
-8.83	322
-8.82	339
-8.81	285
-8.8	305
-8.79	327
-8.78	285
-8.77	291
-8.76	260
-8.75	284
-8.74	305
-8.73	268
-8.72	292
-8.71	281
-8.7	293
-8.69	312
-8.68	302
-8.67	319
-8.66	297
-8.65	318
-8.64	299
-8.63	304
-8.62	316
-8.61	311
-8.6	292
-8.59	294
-8.58	313
-8.57	322
-8.56	286
-8.55	332
-8.54	272
-8.53	300
-8.52	313
-8.51	305
-8.5	288
-8.49	356
-8.48	293
-8.47	301
-8.46	281
-8.45	328
-8.44	312
-8.43	299
-8.42	299
-8.41	312
-8.4	314
-8.39	310
-8.38	304
-8.37	302
-8.36	317
-8.35	340
-8.34	306
-8.33	284
-8.32	317
-8.31	274
-8.3	305
-8.29	275
-8.28	279
-8.27	318
-8.26	309
-8.25	297
-8.24	307
-8.23	323
-8.22	314
-8.21	306
-8.2	322
-8.19	308
-8.18	314
-8.17	322
-8.16	302
-8.15	299
-8.14	293
-8.13	320
-8.12	309
-8.11	308
-8.1	298
-8.09	321
-8.08	272
-8.07	297
-8.06	299
-8.05	309
-8.04	288
-8.03	302
-8.02	313
-8.01	291
-8	295
-7.99	330
-7.98	318
-7.97	289
-7.96	303
-7.95	304
-7.94	308
-7.93	307
-7.92	340
-7.91	318
-7.9	342
-7.89	303
-7.88	290
-7.87	283
-7.86	278
-7.85	304
-7.84	313
-7.83	287
-7.82	312
-7.81	295
-7.8	259
-7.79	278
-7.78	329
-7.77	304
-7.76	296
-7.75	326
-7.74	282
-7.73	317
-7.72	328
-7.71	307
-7.7	311
-7.69	313
-7.68	334
-7.67	292
-7.66	327
-7.65	291
-7.64	315
-7.63	276
-7.62	292
-7.61	286
-7.6	303
-7.59	323
-7.58	333
-7.57	324
-7.56	342
-7.55	318
-7.54	308
-7.53	299
-7.52	298
-7.51	320
-7.5	271
-7.49	314
-7.48	304
-7.47	307
-7.46	351
-7.45	295
-7.44	325
-7.43	314
-7.42	314
-7.41	316
-7.4	298
-7.39	313
-7.38	312
-7.37	337
-7.36	341
-7.35	312
-7.34	307
-7.33	305
-7.32	319
-7.31	315
-7.3	290
-7.29	311
-7.28	293
-7.27	310
-7.26	284
-7.25	305
-7.24	291
-7.23	297
-7.22	321
-7.21	320
-7.2	286
-7.19	314
-7.18	303
-7.17	311
-7.16	308
-7.15	293
-7.14	280
-7.13	327
-7.12	322
-7.11	302
-7.1	293
-7.09	288
-7.08	316
-7.07	275
-7.06	299
-7.05	260
-7.04	298
-7.03	307
-7.02	319
-7.01	302
-7	286
-6.99	269
-6.98	318
-6.97	313
-6.96	310
-6.95	338
-6.94	328
-6.93	324
-6.92	300
-6.91	285
-6.9	321
-6.89	290
-6.88	328
-6.87	303
-6.86	352
-6.85	309
-6.84	291
-6.83	326
-6.82	303
-6.81	273
-6.8	301
-6.79	317
-6.78	274
-6.77	349
-6.76	319
-6.75	276
-6.74	303
-6.73	311
-6.72	324
-6.71	287
-6.7	303
-6.69	311
-6.68	307
-6.67	326
-6.66	286
-6.65	333
-6.64	287
-6.63	277
-6.62	361
-6.61	297
-6.6	327
-6.59	288
-6.58	285
-6.57	332
-6.56	315
-6.55	288
-6.54	325
-6.53	299
-6.52	298
-6.51	351
-6.5	294
-6.49	287
-6.48	343
-6.47	301
-6.46	320
-6.45	288
-6.44	310
-6.43	305
-6.42	323
-6.41	333
-6.4	321
-6.39	302
-6.38	283
-6.37	295
-6.36	317
-6.35	318
-6.34	327
-6.33	307
-6.32	302
-6.31	312
-6.3	302
-6.29	267
-6.28	324
-6.27	290
-6.26	292
-6.25	308
-6.24	311
-6.23	316
-6.22	316
-6.21	291
-6.2	306
-6.19	290
-6.18	317
-6.17	299
-6.16	311
-6.15	295
-6.14	309
-6.13	330
-6.12	340
-6.11	287
-6.1	302
-6.09	297
-6.08	318
-6.07	314
-6.06	301
-6.05	306
-6.04	312
-6.03	311
-6.02	333
-6.01	316
-6	300
-5.99	317
-5.98	296
-5.97	295
-5.96	300
-5.95	332
-5.94	290
-5.93	289
-5.92	305
-5.91	330
-5.9	318
-5.89	306
-5.88	301
-5.87	286
-5.86	298
-5.85	307
-5.84	324
-5.83	314
-5.82	309
-5.81	321
-5.8	298
-5.79	319
-5.78	324
-5.77	289
-5.76	277
-5.75	302
-5.74	306
-5.73	301
-5.72	307
-5.71	330
-5.7	345
-5.69	314
-5.68	294
-5.67	330
-5.66	307
-5.65	300
-5.64	284
-5.63	291
-5.62	320
-5.61	308
-5.6	278
-5.59	279
-5.58	276
-5.57	306
-5.56	288
-5.55	305
-5.54	289
-5.53	324
-5.52	265
-5.51	308
-5.5	309
-5.49	300
-5.48	285
-5.47	284
-5.46	301
-5.45	329
-5.44	258
-5.43	297
-5.42	305
-5.41	293
-5.4	304
-5.39	299
-5.38	301
-5.37	301
-5.36	311
-5.35	260
-5.34	309
-5.33	309
-5.32	312
-5.31	310
-5.3	310
-5.29	309
-5.28	324
-5.27	326
-5.26	321
-5.25	323
-5.24	286
-5.23	316
-5.22	289
-5.21	327
-5.2	325
-5.19	329
-5.18	300
-5.17	287
-5.16	323
-5.15	312
-5.14	312
-5.13	309
-5.12	315
-5.11	309
-5.1	281
-5.09	295
-5.08	304
-5.07	317
-5.06	289
-5.05	293
-5.04	327
-5.03	307
-5.02	276
-5.01	292
-5	273
-4.99	317
-4.98	316
-4.97	331
-4.96	312
-4.95	352
-4.94	339
-4.93	319
-4.92	291
-4.91	347
-4.9	304
-4.89	303
-4.88	292
-4.87	324
-4.86	255
-4.85	279
-4.84	282
-4.83	286
-4.82	286
-4.81	318
-4.8	278
-4.79	283
-4.78	307
-4.77	327
-4.76	296
-4.75	303
-4.74	318
-4.73	283
-4.72	294
-4.71	311
-4.7	292
-4.69	285
-4.68	310
-4.67	272
-4.66	324
-4.65	333
-4.64	320
-4.63	350
-4.62	317
-4.61	296
-4.6	301
-4.59	303
-4.58	304
-4.57	334
-4.56	308
-4.55	261
-4.54	324
-4.53	280
-4.52	329
-4.51	330
-4.5	304
-4.49	304
-4.48	297
-4.47	345
-4.46	310
-4.45	302
-4.44	321
-4.43	330
-4.42	298
-4.41	307
-4.4	313
-4.39	322
-4.38	319
-4.37	301
-4.36	301
-4.35	305
-4.34	328
-4.33	342
-4.32	313
-4.31	299
-4.3	284
-4.29	331
-4.28	274
-4.27	323
-4.26	298
-4.25	272
-4.24	334
-4.23	290
-4.22	324
-4.21	280
-4.2	269
-4.19	333
-4.18	289
-4.17	299
-4.16	300
-4.15	314
-4.14	326
-4.13	308
-4.12	361
-4.11	343
-4.1	318
-4.09	330
-4.08	279
-4.07	281
-4.06	316
-4.05	293
-4.04	309
-4.03	295
-4.02	284
-4.01	299
-4	308
-3.99	297
-3.98	276
-3.97	295
-3.96	308
-3.95	304
-3.94	308
-3.93	296
-3.92	321
-3.91	340
-3.9	330
-3.89	291
-3.88	269
-3.87	319
-3.86	304
-3.85	319
-3.84	300
-3.83	302
-3.82	289
-3.81	298
-3.8	306
-3.79	321
-3.78	323
-3.77	297
-3.76	301
-3.75	287
-3.74	338
-3.73	315
-3.72	334
-3.71	308
-3.7	329
-3.69	290
-3.68	297
-3.67	296
-3.66	305
-3.65	303
-3.64	308
-3.63	326
-3.62	323
-3.61	290
-3.6	304
-3.59	301
-3.58	312
-3.57	293
-3.56	295
-3.55	332
-3.54	309
-3.53	302
-3.52	285
-3.51	323
-3.5	306
-3.49	335
-3.48	295
-3.47	332
-3.46	335
-3.45	314
-3.44	317
-3.43	296
-3.42	297
-3.41	309
-3.4	322
-3.39	348
-3.38	299
-3.37	288
-3.36	310
-3.35	279
-3.34	286
-3.33	289
-3.32	281
-3.31	314
-3.3	311
-3.29	320
-3.28	307
-3.27	290
-3.26	315
-3.25	318
-3.24	305
-3.23	310
-3.22	325
-3.21	356
-3.2	339
-3.19	308
-3.18	316
-3.17	304
-3.16	293
-3.15	302
-3.14	291
-3.13	279
-3.12	299
-3.11	340
-3.1	319
-3.09	317
-3.08	287
-3.07	301
-3.06	297
-3.05	296
-3.04	279
-3.03	277
-3.02	294
-3.01	328
-3	302
-2.99	294
-2.98	251
-2.97	272
-2.96	333
-2.95	309
-2.94	290
-2.93	291
-2.92	297
-2.91	299
-2.9	346
-2.89	299
-2.88	307
-2.87	332
-2.86	339
-2.85	325
-2.84	313
-2.83	325
-2.82	298
-2.81	300
-2.8	284
-2.79	283
-2.78	323
-2.77	315
-2.76	322
-2.75	288
-2.74	301
-2.73	288
-2.72	313
-2.71	348
-2.7	297
-2.69	270
-2.68	308
-2.67	287
-2.66	296
-2.65	272
-2.64	312
-2.63	308
-2.62	282
-2.61	299
-2.6	292
-2.59	290
-2.58	322
-2.57	328
-2.56	328
-2.55	319
-2.54	312
-2.53	328
-2.52	316
-2.51	299
-2.5	293
-2.49	306
-2.48	302
-2.47	300
-2.46	300
-2.45	285
-2.44	300
-2.43	332
-2.42	336
-2.41	291
-2.4	300
-2.39	302
-2.38	317
-2.37	310
-2.36	308
-2.35	343
-2.34	300
-2.33	277
-2.32	277
-2.31	316
-2.3	317
-2.29	331
-2.28	326
-2.27	316
-2.26	304
-2.25	318
-2.24	298
-2.23	341
-2.22	298
-2.21	298
-2.2	304
-2.19	310
-2.18	275
-2.17	302
-2.16	287
-2.15	292
-2.14	283
-2.13	304
-2.12	328
-2.11	330
-2.1	317
-2.09	334
-2.08	317
-2.07	318
-2.06	314
-2.05	294
-2.04	330
-2.03	313
-2.02	308
-2.01	316
-2	320
-1.99	298
-1.98	306
-1.97	300
-1.96	289
-1.95	319
-1.94	301
-1.93	264
-1.92	286
-1.91	244
-1.9	269
-1.89	291
-1.88	316
-1.87	297
-1.86	271
-1.85	325
-1.84	292
-1.83	302
-1.82	307
-1.81	303
-1.8	321
-1.79	329
-1.78	315
-1.77	257
-1.76	303
-1.75	277
-1.74	270
-1.73	325
-1.72	351
-1.71	332
-1.7	319
-1.69	304
-1.68	339
-1.67	293
-1.66	282
-1.65	323
-1.64	306
-1.63	284
-1.62	305
-1.61	301
-1.6	301
-1.59	313
-1.58	280
-1.57	321
-1.56	321
-1.55	286
-1.54	308
-1.53	309
-1.52	319
-1.51	311
-1.5	289
-1.49	316
-1.48	296
-1.47	291
-1.46	308
-1.45	304
-1.44	290
-1.43	301
-1.42	332
-1.41	306
-1.4	284
-1.39	282
-1.38	283
-1.37	303
-1.36	300
-1.35	280
-1.34	302
-1.33	318
-1.32	329
-1.31	308
-1.3	305
-1.29	314
-1.28	333
-1.27	296
-1.26	269
-1.25	309
-1.24	305
-1.23	264
-1.22	312
-1.21	314
-1.2	308
-1.19	296
-1.18	304
-1.17	306
-1.16	295
-1.15	287
-1.14	284
-1.13	305
-1.12	314
-1.11	280
-1.1	314
-1.09	316
-1.08	281
-1.07	288
-1.06	291
-1.05	287
-1.04	332
-1.03	329
-1.02	316
-1.01	335
-1	303
-0.99	347
-0.98	290
-0.97	318
-0.96	297
-0.95	322
-0.94	289
-0.93	320
-0.92	304
-0.91	290
-0.9	285
-0.89	319
-0.88	289
-0.87	334
-0.86	322
-0.85	294
-0.84	312
-0.83	294
-0.82	319
-0.81	311
-0.8	293
-0.79	326
-0.78	288
-0.77	298
-0.76	331
-0.75	281
-0.74	323
-0.73	297
-0.72	287
-0.71	302
-0.7	322
-0.69	286
-0.68	330
-0.67	347
-0.66	328
-0.65	316
-0.64	324
-0.63	340
-0.62	319
-0.61	312
-0.6	314
-0.59	339
-0.58	323
-0.57	324
-0.56	316
-0.55	321
-0.54	351
-0.53	324
-0.52	320
-0.51	296
-0.5	339
-0.49	351
-0.48	358
-0.47	375
-0.46	368
-0.45	314
-0.44	366
-0.43	364
-0.42	367
-0.41	373
-0.4	330
-0.39	348
-0.38	340
-0.37	373
-0.36	373
-0.35	360
-0.34	364
-0.33	395
-0.32	379
-0.31	397
-0.3	372
-0.29	339
-0.28	399
-0.27	360
-0.26	366
-0.25	396
-0.24	390
-0.23	379
-0.22	371
-0.21	383
-0.2	420
-0.19	367
-0.18	374
-0.17	443
-0.16	423
-0.15	448
-0.14	432
-0.13	404
-0.12	389
-0.11	397
-0.1	398
-0.09	385
-0.08	380
-0.07	352
-0.06	337
-0.05	347
-0.04	343
-0.03	308
-0.02	335
-0.01	302
0	238
0.01	280
0.02	253
0.03	242
0.04	288
0.05	281
0.06	275
0.07	305
0.08	342
0.09	289
0.1	319
0.11	312
0.12	303
0.13	321
0.14	304
0.15	310
0.16	287
0.17	313
0.18	294
0.19	279
0.2	262
0.21	285
0.22	285
0.23	272
0.24	315
0.25	279
0.26	286
0.27	286
0.28	282
0.29	293
0.3	273
0.31	312
0.32	258
0.33	265
0.34	276
0.35	288
0.36	289
0.37	304
0.38	292
0.39	294
0.4	295
0.41	283
0.42	286
0.43	307
0.44	308
0.45	285
0.46	262
0.47	301
0.48	305
0.49	264
0.5	298
0.51	270
0.52	292
0.53	296
0.54	299
0.55	307
0.56	288
0.57	275
0.58	310
0.59	291
0.6	290
0.61	326
0.62	317
0.63	296
0.64	307
0.65	303
0.66	290
0.67	277
0.68	286
0.69	329
0.7	282
0.71	342
0.72	297
0.73	313
0.74	295
0.75	305
0.76	297
0.77	279
0.78	272
0.79	339
0.8	314
0.81	309
0.82	303
0.83	304
0.84	272
0.85	333
0.86	302
0.87	302
0.88	304
0.89	289
0.9	315
0.91	282
0.92	306
0.93	301
0.94	335
0.95	333
0.96	325
0.97	316
0.98	325
0.99	331
1	342
1.01	312
1.02	344
1.03	277
1.04	302
1.05	288
1.06	269
1.07	324
1.08	291
1.09	302
1.1	307
1.11	300
1.12	317
1.13	352
1.14	323
1.15	303
1.16	307
1.17	305
1.18	293
1.19	310
1.2	294
1.21	317
1.22	310
1.23	312
1.24	291
1.25	315
1.26	297
1.27	339
1.28	271
1.29	299
1.3	296
1.31	276
1.32	339
1.33	325
1.34	361
1.35	275
1.36	319
1.37	327
1.38	314
1.39	291
1.4	302
1.41	292
1.42	303
1.43	309
1.44	328
1.45	333
1.46	274
1.47	281
1.48	261
1.49	301
1.5	325
1.51	334
1.52	320
1.53	330
1.54	331
1.55	287
1.56	289
1.57	322
1.58	297
1.59	301
1.6	296
1.61	332
1.62	276
1.63	328
1.64	330
1.65	321
1.66	287
1.67	292
1.68	275
1.69	287
1.7	290
1.71	318
1.72	328
1.73	303
1.74	292
1.75	320
1.76	332
1.77	293
1.78	282
1.79	299
1.8	309
1.81	321
1.82	274
1.83	300
1.84	298
1.85	287
1.86	278
1.87	311
1.88	312
1.89	274
1.9	336
1.91	280
1.92	304
1.93	305
1.94	310
1.95	322
1.96	307
1.97	321
1.98	313
1.99	303
2	301
2.01	259
2.02	293
2.03	302
2.04	288
2.05	294
2.06	291
2.07	266
2.08	298
2.09	331
2.1	273
2.11	289
2.12	281
2.13	291
2.14	276
2.15	265
2.16	284
2.17	309
2.18	320
2.19	317
2.2	311
2.21	302
2.22	315
2.23	297
2.24	308
2.25	325
2.26	296
2.27	292
2.28	288
2.29	312
2.3	300
2.31	304
2.32	307
2.33	320
2.34	309
2.35	308
2.36	307
2.37	298
2.38	338
2.39	295
2.4	330
2.41	289
2.42	298
2.43	338
2.44	305
2.45	291
2.46	318
2.47	324
2.48	294
2.49	316
2.5	308
2.51	282
2.52	313
2.53	277
2.54	280
2.55	303
2.56	291
2.57	303
2.58	333
2.59	297
2.6	299
2.61	302
2.62	297
2.63	275
2.64	309
2.65	297
2.66	304
2.67	296
2.68	309
2.69	319
2.7	292
2.71	335
2.72	290
2.73	288
2.74	318
2.75	293
2.76	339
2.77	302
2.78	312
2.79	290
2.8	292
2.81	309
2.82	338
2.83	299
2.84	283
2.85	308
2.86	273
2.87	260
2.88	268
2.89	308
2.9	330
2.91	325
2.92	317
2.93	303
2.94	296
2.95	266
2.96	289
2.97	295
2.98	322
2.99	294
3	287
3.01	321
3.02	309
3.03	295
3.04	316
3.05	311
3.06	366
3.07	326
3.08	330
3.09	313
3.1	280
3.11	322
3.12	299
3.13	321
3.14	284
3.15	316
3.16	291
3.17	298
3.18	324
3.19	326
3.2	304
3.21	307
3.22	301
3.23	300
3.24	244
3.25	314
3.26	281
3.27	296
3.28	304
3.29	306
3.3	302
3.31	302
3.32	318
3.33	286
3.34	261
3.35	312
3.36	310
3.37	300
3.38	294
3.39	282
3.4	294
3.41	304
3.42	295
3.43	286
3.44	266
3.45	293
3.46	302
3.47	303
3.48	272
3.49	322
3.5	298
3.51	293
3.52	300
3.53	298
3.54	272
3.55	324
3.56	260
3.57	309
3.58	303
3.59	296
3.6	296
3.61	303
3.62	343
3.63	347
3.64	276
3.65	289
3.66	308
3.67	298
3.68	315
3.69	272
3.7	308
3.71	308
3.72	318
3.73	284
3.74	290
3.75	314
3.76	260
3.77	291
3.78	271
3.79	302
3.8	332
3.81	288
3.82	305
3.83	341
3.84	312
3.85	301
3.86	313
3.87	298
3.88	294
3.89	315
3.9	329
3.91	277
3.92	289
3.93	273
3.94	265
3.95	303
3.96	295
3.97	291
3.98	297
3.99	313
4	297
4.01	310
4.02	279
4.03	291
4.04	315
4.05	312
4.06	303
4.07	307
4.08	302
4.09	294
4.1	337
4.11	303
4.12	259
4.13	321
4.14	308
4.15	301
4.16	314
4.17	269
4.18	304
4.19	295
4.2	313
4.21	297
4.22	321
4.23	303
4.24	317
4.25	314
4.26	305
4.27	331
4.28	297
4.29	285
4.3	315
4.31	283
4.32	292
4.33	334
4.34	312
4.35	289
4.36	301
4.37	285
4.38	330
4.39	334
4.4	282
4.41	320
4.42	286
4.43	340
4.44	287
4.45	278
4.46	328
4.47	320
4.48	308
4.49	286
4.5	291
4.51	292
4.52	274
4.53	290
4.54	289
4.55	299
4.56	310
4.57	300
4.58	309
4.59	275
4.6	305
4.61	279
4.62	311
4.63	319
4.64	302
4.65	322
4.66	272
4.67	309
4.68	294
4.69	245
4.7	304
4.71	309
4.72	300
4.73	314
4.74	293
4.75	311
4.76	300
4.77	284
4.78	310
4.79	304
4.8	311
4.81	295
4.82	328
4.83	296
4.84	270
4.85	312
4.86	304
4.87	309
4.88	294
4.89	288
4.9	309
4.91	285
4.92	295
4.93	302
4.94	289
4.95	319
4.96	304
4.97	307
4.98	312
4.99	295
5	337
5.01	337
5.02	306
5.03	300
5.04	346
5.05	292
5.06	329
5.07	320
5.08	282
5.09	322
5.1	284
5.11	316
5.12	295
5.13	324
5.14	295
5.15	306
5.16	329
5.17	279
5.18	316
5.19	297
5.2	246
5.21	294
5.22	303
5.23	297
5.24	275
5.25	293
5.26	312
5.27	325
5.28	308
5.29	312
5.3	308
5.31	310
5.32	300
5.33	298
5.34	320
5.35	282
5.36	304
5.37	293
5.38	308
5.39	275
5.4	333
5.41	263
5.42	299
5.43	270
5.44	306
5.45	322
5.46	290
5.47	299
5.48	316
5.49	298
5.5	292
5.51	304
5.52	319
5.53	316
5.54	304
5.55	324
5.56	295
5.57	303
5.58	305
5.59	303
5.6	290
5.61	314
5.62	318
5.63	312
5.64	283
5.65	325
5.66	315
5.67	348
5.68	313
5.69	292
5.7	313
5.71	290
5.72	323
5.73	295
5.74	304
5.75	278
5.76	274
5.77	283
5.78	306
5.79	305
5.8	328
5.81	309
5.82	313
5.83	309
5.84	318
5.85	288
5.86	304
5.87	273
5.88	315
5.89	343
5.9	312
5.91	295
5.92	285
5.93	328
5.94	307
5.95	322
5.96	286
5.97	299
5.98	274
5.99	293
6	286
6.01	296
6.02	308
6.03	294
6.04	297
6.05	306
6.06	299
6.07	262
6.08	306
6.09	295
6.1	302
6.11	315
6.12	310
6.13	331
6.14	299
6.15	278
6.16	283
6.17	340
6.18	279
6.19	299
6.2	303
6.21	303
6.22	310
6.23	300
6.24	313
6.25	304
6.26	295
6.27	286
6.28	292
6.29	322
6.3	290
6.31	323
6.32	299
6.33	348
6.34	332
6.35	289
6.36	310
6.37	322
6.38	291
6.39	297
6.4	327
6.41	318
6.42	311
6.43	306
6.44	320
6.45	308
6.46	338
6.47	320
6.48	276
6.49	306
6.5	282
6.51	288
6.52	301
6.53	330
6.54	315
6.55	303
6.56	284
6.57	318
6.58	271
6.59	275
6.6	278
6.61	272
6.62	292
6.63	307
6.64	318
6.65	290
6.66	272
6.67	310
6.68	298
6.69	299
6.7	261
6.71	298
6.72	314
6.73	317
6.74	326
6.75	316
6.76	305
6.77	291
6.78	317
6.79	324
6.8	284
6.81	319
6.82	300
6.83	295
6.84	306
6.85	329
6.86	329
6.87	341
6.88	306
6.89	339
6.9	300
6.91	351
6.92	333
6.93	356
6.94	308
6.95	307
6.96	293
6.97	288
6.98	299
6.99	323
7	283
7.01	297
7.02	323
7.03	288
7.04	330
7.05	324
7.06	300
7.07	323
7.08	295
7.09	315
7.1	311
7.11	321
7.12	303
7.13	287
7.14	319
7.15	278
7.16	318
7.17	283
7.18	301
7.19	284
7.2	279
7.21	300
7.22	329
7.23	305
7.24	294
7.25	319
7.26	296
7.27	308
7.28	285
7.29	293
7.3	287
7.31	302
7.32	291
7.33	295
7.34	259
7.35	309
7.36	272
7.37	304
7.38	306
7.39	329
7.4	288
7.41	293
7.42	328
7.43	297
7.44	308
7.45	272
7.46	288
7.47	307
7.48	290
7.49	315
7.5	290
7.51	250
7.52	298
7.53	323
7.54	324
7.55	289
7.56	297
7.57	282
7.58	310
7.59	317
7.6	289
7.61	303
7.62	283
7.63	342
7.64	322
7.65	286
7.66	287
7.67	291
7.68	324
7.69	297
7.7	304
7.71	282
7.72	326
7.73	307
7.74	293
7.75	303
7.76	305
7.77	281
7.78	328
7.79	313
7.8	311
7.81	279
7.82	325
7.83	281
7.84	340
7.85	324
7.86	300
7.87	310
7.88	300
7.89	279
7.9	309
7.91	270
7.92	325
7.93	308
7.94	300
7.95	286
7.96	327
7.97	324
7.98	274
7.99	277
8	279
8.01	286
8.02	291
8.03	328
8.04	284
8.05	281
8.06	307
8.07	298
8.08	311
8.09	317
8.1	296
8.11	296
8.12	283
8.13	308
8.14	302
8.15	306
8.16	328
8.17	269
8.18	328
8.19	290
8.2	320
8.21	316
8.22	297
8.23	290
8.24	312
8.25	298
8.26	318
8.27	323
8.28	329
8.29	322
8.3	307
8.31	323
8.32	298
8.33	330
8.34	311
8.35	289
8.36	313
8.37	325
8.38	323
8.39	308
8.4	325
8.41	324
8.42	341
8.43	312
8.44	323
8.45	331
8.46	338
8.47	334
8.48	316
8.49	293
8.5	331
8.51	302
8.52	302
8.53	283
8.54	305
8.55	277
8.56	284
8.57	304
8.58	269
8.59	312
8.6	296
8.61	333
8.62	316
8.63	327
8.64	338
8.65	328
8.66	268
8.67	327
8.68	318
8.69	287
8.7	319
8.71	291
8.72	342
8.73	296
8.74	313
8.75	310
8.76	332
8.77	305
8.78	302
8.79	301
8.8	289
8.81	312
8.82	300
8.83	306
8.84	300
8.85	330
8.86	348
8.87	313
8.88	281
8.89	302
8.9	332
8.91	319
8.92	330
8.93	313
8.94	305
8.95	307
8.96	261
8.97	298
8.98	312
8.99	332
9	319
9.01	317
9.02	336
9.03	260
9.04	307
9.05	310
9.06	308
9.07	266
9.08	313
9.09	295
9.1	289
9.11	326
9.12	310
9.13	280
9.14	294
9.15	313
9.16	294
9.17	276
9.18	284
9.19	287
9.2	317
9.21	266
9.22	289
9.23	303
9.24	290
9.25	279
9.26	283
9.27	311
9.28	294
9.29	318
9.3	313
9.31	299
9.32	285
9.33	283
9.34	266
9.35	307
9.36	294
9.37	325
9.38	329
9.39	315
9.4	333
9.41	277
9.42	294
9.43	302
9.44	304
9.45	370
9.46	302
9.47	307
9.48	263
9.49	312
9.5	304
9.51	305
9.52	297
9.53	304
9.54	301
9.55	292
9.56	324
9.57	282
9.58	294
9.59	306
9.6	318
9.61	301
9.62	369
9.63	338
9.64	314
9.65	313
9.66	308
9.67	296
9.68	281
9.69	301
9.7	300
9.71	305
9.72	292
9.73	334
9.74	306
9.75	299
9.76	305
9.77	260
9.78	304
9.79	329
9.8	298
9.81	277
9.82	293
9.83	318
9.84	336
9.85	299
9.86	318
9.87	299
9.88	298
9.89	299
9.9	323
9.91	287
9.92	310
9.93	325
9.94	309
9.95	320
9.96	307
9.97	324
9.98	324
[truncated: 1 more rows]

## Sheet: Fig3E
dist	freq
-10	288
-9.99	353
-9.98	295
-9.97	287
-9.96	317
-9.95	320
-9.94	372
-9.93	328
-9.92	309
-9.91	348
-9.9	299
-9.89	287
-9.88	335
-9.87	327
-9.86	314
-9.85	322
-9.84	318
-9.83	294
-9.82	298
-9.81	334
-9.8	295
-9.79	277
-9.78	278
-9.77	317
-9.76	310
-9.75	300
-9.74	341
-9.73	306
-9.72	302
-9.71	306
-9.7	307
-9.69	305
-9.68	282
-9.67	281
-9.66	301
-9.65	350
-9.64	300
-9.63	303
-9.62	296
-9.61	271
-9.6	325
-9.59	303
-9.58	295
-9.57	340
-9.56	293
-9.55	282
-9.54	295
-9.53	298
-9.52	283
-9.51	319
-9.5	318
-9.49	327
-9.48	278
-9.47	307
-9.46	314
-9.45	325
-9.44	294
-9.43	306
-9.42	313
-9.41	292
-9.4	307
-9.39	317
-9.38	278
-9.37	331
-9.36	309
-9.35	324
-9.34	311
-9.33	312
-9.32	289
-9.31	322
-9.3	308
-9.29	295
-9.28	313
-9.27	284
-9.26	307
-9.25	335
-9.24	311
-9.23	314
-9.22	326
-9.21	301
-9.2	323
-9.19	286
-9.18	305
-9.17	336
-9.16	276
-9.15	326
-9.14	265
-9.13	345
-9.12	317
-9.11	316
-9.1	303
-9.09	303
-9.08	271
-9.07	323
-9.06	292
-9.05	296
-9.04	297
-9.03	323
-9.02	306
-9.01	297
-9	312
-8.99	281
-8.98	331
-8.97	277
-8.96	337
-8.95	283
-8.94	281
-8.93	314
-8.92	293
-8.91	266
-8.9	308
-8.89	321
-8.88	349
-8.87	284
-8.86	316
-8.85	284
-8.84	309
-8.83	344
-8.82	307
-8.81	318
-8.8	292
-8.79	292
-8.78	334
-8.77	298
-8.76	324
-8.75	306
-8.74	313
-8.73	303
-8.72	292
-8.71	292
-8.7	324
-8.69	292
-8.68	339
-8.67	330
-8.66	300
-8.65	308
-8.64	298
-8.63	321
-8.62	298
-8.61	294
-8.6	310
-8.59	267
-8.58	286
-8.57	305
-8.56	287
-8.55	292
-8.54	287
-8.53	267
-8.52	346
-8.51	293
-8.5	299
-8.49	329
-8.48	273
-8.47	308
-8.46	309
-8.45	314
-8.44	287
-8.43	308
-8.42	325
-8.41	297
-8.4	303
-8.39	306
-8.38	301
-8.37	314
-8.36	330
-8.35	272
-8.34	262
-8.33	305
-8.32	297
-8.31	298
-8.3	319
-8.29	300
-8.28	329
-8.27	288
-8.26	306
-8.25	279
-8.24	301
-8.23	304
-8.22	291
-8.21	326
-8.2	286
-8.19	306
-8.18	331
-8.17	287
-8.16	279
-8.15	287
-8.14	277
-8.13	325
-8.12	311
-8.11	291
-8.1	301
-8.09	318
-8.08	308
-8.07	313
-8.06	320
-8.05	280
-8.04	295
-8.03	295
-8.02	299
-8.01	323
-8	327
-7.99	317
-7.98	310
-7.97	289
-7.96	305
-7.95	314
-7.94	304
-7.93	276
-7.92	282
-7.91	285
-7.9	317
-7.89	299
-7.88	321
-7.87	301
-7.86	277
-7.85	260
-7.84	299
-7.83	291
-7.82	301
-7.81	305
-7.8	312
-7.79	292
-7.78	317
-7.77	307
-7.76	328
-7.75	317
-7.74	303
-7.73	332
-7.72	315
-7.71	278
-7.7	325
-7.69	287
-7.68	279
-7.67	296
-7.66	297
-7.65	300
-7.64	301
-7.63	301
-7.62	295
-7.61	289
-7.6	301
-7.59	272
-7.58	303
-7.57	330
-7.56	299
-7.55	294
-7.54	300
-7.53	300
-7.52	296
-7.51	286
-7.5	281
-7.49	253
-7.48	312
-7.47	297
-7.46	306
-7.45	320
-7.44	314
-7.43	299
-7.42	301
-7.41	315
-7.4	305
-7.39	271
-7.38	259
-7.37	310
-7.36	310
-7.35	318
-7.34	353
-7.33	312
-7.32	306
-7.31	280
-7.3	300
-7.29	276
-7.28	309
-7.27	326
-7.26	314
-7.25	294
-7.24	304
-7.23	316
-7.22	330
-7.21	295
-7.2	258
-7.19	291
-7.18	311
-7.17	294
-7.16	256
-7.15	313
-7.14	296
-7.13	310
-7.12	296
-7.11	265
-7.1	324
-7.09	303
-7.08	297
-7.07	289
-7.06	307
-7.05	305
-7.04	331
-7.03	316
-7.02	298
-7.01	301
-7	318
-6.99	294
-6.98	285
-6.97	288
-6.96	295
-6.95	326
-6.94	307
-6.93	324
-6.92	320
-6.91	281
-6.9	266
-6.89	360
-6.88	305
-6.87	265
-6.86	333
-6.85	299
-6.84	324
-6.83	335
-6.82	300
-6.81	311
-6.8	292
-6.79	302
-6.78	310
-6.77	323
-6.76	283
-6.75	322
-6.74	295
-6.73	284
-6.72	291
-6.71	326
-6.7	331
-6.69	278
-6.68	314
-6.67	302
-6.66	309
-6.65	308
-6.64	281
-6.63	302
-6.62	310
-6.61	348
-6.6	308
-6.59	285
-6.58	332
-6.57	315
-6.56	301
-6.55	328
-6.54	323
-6.53	308
-6.52	300
-6.51	331
-6.5	287
-6.49	281
-6.48	294
-6.47	307
-6.46	291
-6.45	321
-6.44	304
-6.43	296
-6.42	299
-6.41	298
-6.4	280
-6.39	320
-6.38	328
-6.37	295
-6.36	271
-6.35	296
-6.34	299
-6.33	309
-6.32	306
-6.31	335
-6.3	344
-6.29	301
-6.28	288
-6.27	319
-6.26	297
-6.25	328
-6.24	332
-6.23	324
-6.22	327
-6.21	323
-6.2	289
-6.19	276
-6.18	283
-6.17	299
-6.16	310
-6.15	345
-6.14	289
-6.13	309
-6.12	322
-6.11	290
-6.1	322
-6.09	314
-6.08	279
-6.07	296
-6.06	325
-6.05	297
-6.04	306
-6.03	334
-6.02	298
-6.01	243
-6	314
-5.99	312
-5.98	306
-5.97	305
-5.96	323
-5.95	301
-5.94	306
-5.93	305
-5.92	312
-5.91	318
-5.9	297
-5.89	298
-5.88	307
-5.87	331
-5.86	296
-5.85	286
-5.84	307
-5.83	310
-5.82	331
-5.81	298
-5.8	300
-5.79	293
-5.78	300
-5.77	291
-5.76	333
-5.75	316
-5.74	327
-5.73	291
-5.72	265
-5.71	265
-5.7	304
-5.69	307
-5.68	326
-5.67	306
-5.66	316
-5.65	296
-5.64	301
-5.63	321
-5.62	301
-5.61	327
-5.6	287
-5.59	292
-5.58	275
-5.57	306
-5.56	286
-5.55	338
-5.54	291
-5.53	300
-5.52	270
-5.51	298
-5.5	297
-5.49	305
-5.48	293
-5.47	295
-5.46	292
-5.45	296
-5.44	284
-5.43	292
-5.42	279
-5.41	295
-5.4	307
-5.39	288
-5.38	297
-5.37	306
-5.36	329
-5.35	307
-5.34	292
-5.33	292
-5.32	316
-5.31	290
-5.3	300
-5.29	293
-5.28	294
-5.27	325
-5.26	291
-5.25	271
-5.24	294
-5.23	290
-5.22	265
-5.21	312
-5.2	287
-5.19	295
-5.18	316
-5.17	300
-5.16	320
-5.15	289
-5.14	303
-5.13	309
-5.12	270
-5.11	324
-5.1	298
-5.09	285
-5.08	308
-5.07	290
-5.06	311
-5.05	305
-5.04	297
-5.03	316
-5.02	285
-5.01	324
-5	304
-4.99	297
-4.98	299
-4.97	294
-4.96	303
-4.95	316
-4.94	266
-4.93	289
-4.92	321
-4.91	276
-4.9	281
-4.89	271
-4.88	291
-4.87	287
-4.86	284
-4.85	268
-4.84	268
-4.83	263
-4.82	298
-4.81	298
-4.8	302
-4.79	330
-4.78	305
-4.77	341
-4.76	312
-4.75	301
-4.74	317
-4.73	343
-4.72	296
-4.71	287
-4.7	292
-4.69	298
-4.68	293
-4.67	287
-4.66	307
-4.65	326
-4.64	302
-4.63	306
-4.62	307
-4.61	312
-4.6	287
-4.59	304
-4.58	337
-4.57	333
-4.56	290
-4.55	302
-4.54	326
-4.53	315
-4.52	333
-4.51	321
-4.5	299
-4.49	289
-4.48	309
-4.47	307
-4.46	328
-4.45	290
-4.44	310
-4.43	325
-4.42	320
-4.41	311
-4.4	308
-4.39	301
-4.38	313
-4.37	344
-4.36	331
-4.35	347
-4.34	307
-4.33	331
-4.32	285
-4.31	314
-4.3	329
-4.29	328
-4.28	303
-4.27	308
-4.26	304
-4.25	294
-4.24	275
-4.23	292
-4.22	300
-4.21	312
-4.2	295
-4.19	310
-4.18	322
-4.17	310
-4.16	298
-4.15	326
-4.14	303
-4.13	286
-4.12	285
-4.11	291
-4.1	285
-4.09	283
-4.08	317
-4.07	325
-4.06	302
-4.05	303
-4.04	320
-4.03	289
-4.02	291
-4.01	333
-4	323
-3.99	323
-3.98	291
-3.97	298
-3.96	308
-3.95	307
-3.94	335
-3.93	336
-3.92	316
-3.91	305
-3.9	272
-3.89	314
-3.88	279
-3.87	301
-3.86	318
-3.85	302
-3.84	298
-3.83	248
-3.82	299
-3.81	288
-3.8	296
-3.79	277
-3.78	283
-3.77	282
-3.76	299
-3.75	266
-3.74	302
-3.73	275
-3.72	284
-3.71	290
-3.7	343
-3.69	328
-3.68	307
-3.67	271
-3.66	306
-3.65	305
-3.64	321
-3.63	310
-3.62	303
-3.61	307
-3.6	297
-3.59	292
-3.58	282
-3.57	287
-3.56	319
-3.55	290
-3.54	312
-3.53	288
-3.52	288
-3.51	327
-3.5	271
-3.49	323
-3.48	294
-3.47	294
-3.46	306
-3.45	302
-3.44	297
-3.43	269
-3.42	318
-3.41	301
-3.4	305
-3.39	337
-3.38	299
-3.37	290
-3.36	315
-3.35	272
-3.34	272
-3.33	283
-3.32	317
-3.31	315
-3.3	332
-3.29	274
-3.28	273
-3.27	318
-3.26	350
-3.25	310
-3.24	309
-3.23	306
-3.22	340
-3.21	330
-3.2	351
-3.19	311
-3.18	299
-3.17	291
-3.16	279
-3.15	320
-3.14	314
-3.13	310
-3.12	318
-3.11	263
-3.1	307
-3.09	309
-3.08	300
-3.07	310
-3.06	307
-3.05	315
-3.04	312
-3.03	304
-3.02	299
-3.01	285
-3	315
-2.99	305
-2.98	291
-2.97	313
-2.96	352
-2.95	305
-2.94	319
-2.93	297
-2.92	298
-2.91	300
-2.9	281
-2.89	315
-2.88	301
-2.87	336
-2.86	321
-2.85	299
-2.84	277
-2.83	281
-2.82	317
-2.81	317
-2.8	306
-2.79	308
-2.78	355
-2.77	323
-2.76	309
-2.75	317
-2.74	309
-2.73	323
-2.72	282
-2.71	322
-2.7	302
-2.69	309
-2.68	303
-2.67	276
-2.66	280
-2.65	296
-2.64	315
-2.63	303
-2.62	319
-2.61	328
-2.6	322
-2.59	302
-2.58	300
-2.57	268
-2.56	303
-2.55	349
-2.54	349
-2.53	324
-2.52	313
-2.51	285
-2.5	315
-2.49	321
-2.48	323
-2.47	335
-2.46	326
-2.45	334
-2.44	314
-2.43	272
-2.42	316
-2.41	300
-2.4	317
-2.39	331
-2.38	340
-2.37	313
-2.36	314
-2.35	300
-2.34	274
-2.33	299
-2.32	309
-2.31	291
-2.3	337
-2.29	301
-2.28	299
-2.27	302
-2.26	293
-2.25	318
-2.24	290
-2.23	315
-2.22	325
-2.21	303
-2.2	310
-2.19	345
-2.18	299
-2.17	319
-2.16	340
-2.15	319
-2.14	325
-2.13	342
-2.12	334
-2.11	310
-2.1	319
-2.09	314
-2.08	335
-2.07	321
-2.06	291
-2.05	281
-2.04	315
-2.03	316
-2.02	300
-2.01	323
-2	297
-1.99	302
-1.98	276
-1.97	318
-1.96	342
-1.95	298
-1.94	291
-1.93	307
-1.92	327
-1.91	292
-1.9	305
-1.89	317
-1.88	298
-1.87	265
-1.86	288
-1.85	289
-1.84	281
-1.83	347
-1.82	297
-1.81	321
-1.8	319
-1.79	326
-1.78	299
-1.77	293
-1.76	303
-1.75	328
-1.74	288
-1.73	327
-1.72	329
-1.71	319
-1.7	285
-1.69	310
-1.68	300
-1.67	323
-1.66	300
-1.65	309
-1.64	325
-1.63	288
-1.62	319
-1.61	315
-1.6	301
-1.59	317
-1.58	273
-1.57	330
-1.56	322
-1.55	315
-1.54	305
-1.53	312
-1.52	313
-1.51	270
-1.5	310
-1.49	308
-1.48	306
-1.47	281
-1.46	318
-1.45	286
-1.44	309
-1.43	315
-1.42	298
-1.41	339
-1.4	301
-1.39	273
-1.38	313
-1.37	312
-1.36	287
-1.35	325
-1.34	278
-1.33	298
-1.32	318
-1.31	316
-1.3	292
-1.29	272
-1.28	290
-1.27	293
-1.26	272
-1.25	304
-1.24	289
-1.23	256
-1.22	278
-1.21	299
-1.2	348
-1.19	319
-1.18	319
-1.17	301
-1.16	272
-1.15	302
-1.14	319
-1.13	315
-1.12	297
-1.11	316
-1.1	285
-1.09	307
-1.08	274
-1.07	311
-1.06	284
-1.05	257
-1.04	291
-1.03	288
-1.02	286
-1.01	316
-1	286
-0.99	306
-0.98	268
-0.97	294
-0.96	322
-0.95	313
-0.94	306
-0.93	267
-0.92	301
-0.91	290
-0.9	309
-0.89	299
-0.88	285
-0.87	279
-0.86	294
-0.85	298
-0.84	294
-0.83	286
-0.82	277
-0.81	277
-0.8	285
-0.79	274
-0.78	302
-0.77	276
-0.76	301
-0.75	292
-0.74	293
-0.73	288
-0.72	310
-0.71	293
-0.7	323
-0.69	281
-0.68	284
-0.67	297
-0.66	278
-0.65	303
-0.64	280
-0.63	297
-0.62	283
-0.61	280
-0.6	315
-0.59	291
-0.58	272
-0.57	281
-0.56	279
-0.55	279
-0.54	313
-0.53	291
-0.52	283
-0.51	277
-0.5	262
-0.49	278
-0.48	267
-0.47	254
-0.46	280
-0.45	304
-0.44	263
-0.43	257
-0.42	291
-0.41	277
-0.4	280
-0.39	236
-0.38	295
-0.37	258
-0.36	263
-0.35	257
-0.34	271
-0.33	258
-0.32	239
-0.31	255
-0.3	283
-0.29	286
-0.28	282
-0.27	262
-0.26	259
-0.25	290
-0.24	256
-0.23	262
-0.22	285
-0.21	272
-0.2	236
-0.19	244
-0.18	274
-0.17	255
-0.16	270
-0.15	267
-0.14	243
-0.13	279
-0.12	264
-0.11	301
-0.1	279
-0.09	328
-0.08	316
-0.07	293
-0.06	294
-0.05	286
-0.04	315
-0.03	289
-0.02	306
-0.01	273
0	414
0.01	504
0.02	461
0.03	506
0.04	442
0.05	406
0.06	386
0.07	437
0.08	373
0.09	376
0.1	375
0.11	383
0.12	330
0.13	384
0.14	353
0.15	362
0.16	365
0.17	312
0.18	374
0.19	338
0.2	304
0.21	322
0.22	340
0.23	322
0.24	350
0.25	350
0.26	324
0.27	328
0.28	322
0.29	339
0.3	332
0.31	297
0.32	304
0.33	322
0.34	287
0.35	302
0.36	320
0.37	307
0.38	298
0.39	287
0.4	278
0.41	332
0.42	307
0.43	297
0.44	302
0.45	291
0.46	311
0.47	308
0.48	301
0.49	318
0.5	308
0.51	333
0.52	302
0.53	309
0.54	307
0.55	284
0.56	283
0.57	308
0.58	323
0.59	297
0.6	309
0.61	299
0.62	302
0.63	298
0.64	332
0.65	315
0.66	322
0.67	297
0.68	274
0.69	288
0.7	307
0.71	308
0.72	281
0.73	314
0.74	283
0.75	296
0.76	289
0.77	343
0.78	311
0.79	326
0.8	347
0.81	319
0.82	265
0.83	272
0.84	265
0.85	295
0.86	306
0.87	299
0.88	295
0.89	297
0.9	295
0.91	308
0.92	290
0.93	302
0.94	306
0.95	295
0.96	304
0.97	284
0.98	295
0.99	263
1	322
1.01	285
1.02	320
1.03	337
1.04	344
1.05	335
1.06	297
1.07	299
1.08	278
1.09	327
1.1	284
1.11	328
1.12	311
1.13	338
1.14	311
1.15	315
1.16	325
1.17	299
1.18	334
1.19	306
1.2	294
1.21	297
1.22	315
1.23	323
1.24	279
1.25	317
1.26	298
1.27	306
1.28	285
1.29	308
1.3	249
1.31	291
1.32	341
1.33	317
1.34	309
1.35	335
1.36	336
1.37	253
1.38	323
1.39	300
1.4	339
1.41	306
1.42	293
1.43	266
1.44	298
1.45	284
1.46	317
1.47	297
1.48	301
1.49	287
1.5	289
1.51	314
1.52	278
1.53	316
1.54	276
1.55	292
1.56	290
1.57	306
1.58	304
1.59	303
1.6	295
1.61	304
1.62	297
1.63	301
1.64	284
1.65	298
1.66	301
1.67	282
1.68	254
1.69	296
1.7	306
1.71	313
1.72	324
1.73	288
1.74	317
1.75	326
1.76	284
1.77	298
1.78	284
1.79	302
1.8	293
1.81	299
1.82	293
1.83	306
1.84	291
1.85	294
1.86	311
1.87	309
1.88	318
1.89	278
1.9	291
1.91	325
1.92	295
1.93	300
1.94	315
1.95	300
1.96	330
1.97	327
1.98	321
1.99	334
2	290
2.01	313
2.02	358
2.03	284
2.04	330
2.05	359
2.06	314
2.07	323
2.08	338
2.09	324
2.1	322
2.11	314
2.12	304
2.13	279
2.14	277
2.15	323
2.16	279
2.17	330
2.18	300
2.19	331
2.2	301
2.21	323
2.22	301
2.23	268
2.24	295
2.25	301
2.26	340
2.27	310
2.28	293
2.29	300
2.3	302
2.31	285
2.32	319
2.33	308
2.34	299
2.35	277
2.36	308
2.37	306
2.38	327
2.39	299
2.4	321
2.41	310
2.42	310
2.43	288
2.44	335
2.45	302
2.46	265
2.47	300
2.48	316
2.49	310
2.5	290
2.51	312
2.52	296
2.53	320
2.54	328
2.55	287
2.56	301
2.57	289
2.58	310
2.59	267
2.6	256
2.61	275
2.62	327
2.63	316
2.64	290
2.65	317
2.66	316
2.67	310
2.68	300
2.69	284
2.7	331
2.71	289
2.72	315
2.73	297
2.74	312
2.75	304
2.76	323
2.77	278
2.78	326
2.79	320
2.8	317
2.81	306
2.82	323
2.83	303
2.84	356
2.85	332
2.86	305
2.87	293
2.88	290
2.89	289
2.9	282
2.91	316
2.92	322
2.93	337
2.94	336
2.95	295
2.96	306
2.97	336
2.98	294
2.99	307
3	331
3.01	304
3.02	289
3.03	292
3.04	285
3.05	305
3.06	297
3.07	293
3.08	316
3.09	320
3.1	306
3.11	314
3.12	315
3.13	318
3.14	323
3.15	317
3.16	274
3.17	277
3.18	319
3.19	326
3.2	315
3.21	313
3.22	311
3.23	328
3.24	284
3.25	309
3.26	309
3.27	300
3.28	329
3.29	347
3.3	313
3.31	287
3.32	308
3.33	302
3.34	336
3.35	327
3.36	313
3.37	353
3.38	330
3.39	294
3.4	307
3.41	302
3.42	319
3.43	354
3.44	323
3.45	313
3.46	334
3.47	317
3.48	304
3.49	325
3.5	301
3.51	318
3.52	315
3.53	282
3.54	294
3.55	317
3.56	302
3.57	337
3.58	292
3.59	316
3.6	289
3.61	321
3.62	308
3.63	295
3.64	298
3.65	286
3.66	314
3.67	316
3.68	312
3.69	316
3.7	302
3.71	299
3.72	329
3.73	300
3.74	278
3.75	306
3.76	286
3.77	298
3.78	315
3.79	309
3.8	315
3.81	294
3.82	341
3.83	293
3.84	307
3.85	288
3.86	280
3.87	295
3.88	285
3.89	289
3.9	270
3.91	308
3.92	346
3.93	304
3.94	281
3.95	306
3.96	294
3.97	273
3.98	279
3.99	355
4	307
4.01	306
4.02	322
4.03	299
4.04	294
4.05	319
4.06	309
4.07	300
4.08	310
4.09	316
4.1	292
4.11	326
4.12	339
4.13	315
4.14	323
4.15	308
4.16	284
4.17	307
4.18	323
4.19	320
4.2	309
4.21	310
4.22	293
4.23	340
4.24	287
4.25	307
4.26	315
4.27	325
4.28	265
4.29	319
4.3	293
4.31	325
4.32	332
4.33	305
4.34	329
4.35	347
4.36	315
4.37	312
4.38	310
4.39	276
4.4	344
4.41	295
4.42	311
4.43	306
4.44	307
4.45	316
4.46	288
4.47	317
4.48	316
4.49	298
4.5	307
4.51	289
4.52	311
4.53	269
4.54	296
4.55	288
4.56	328
4.57	317
4.58	291
4.59	307
4.6	293
4.61	294
4.62	296
4.63	270
4.64	284
4.65	317
4.66	285
4.67	286
4.68	278
4.69	326
4.7	304
4.71	311
4.72	258
4.73	291
4.74	305
4.75	324
4.76	326
4.77	310
4.78	301
4.79	307
4.8	319
4.81	300
4.82	321
4.83	298
4.84	296
4.85	303
4.86	292
4.87	284
4.88	296
4.89	302
4.9	329
4.91	288
4.92	298
4.93	276
4.94	272
4.95	296
4.96	314
4.97	317
4.98	321
4.99	312
5	297
5.01	294
5.02	305
5.03	287
5.04	298
5.05	296
5.06	286
5.07	286
5.08	295
5.09	342
5.1	304
5.11	302
5.12	341
5.13	283
5.14	309
5.15	321
5.16	286
5.17	326
5.18	334
5.19	304
5.2	303
5.21	269
5.22	269
5.23	300
5.24	294
5.25	292
5.26	259
5.27	318
5.28	281
5.29	286
5.3	297
5.31	285
5.32	288
5.33	299
5.34	274
5.35	298
5.36	323
5.37	257
5.38	295
5.39	280
5.4	284
5.41	294
5.42	304
5.43	292
5.44	299
5.45	295
5.46	304
5.47	303
5.48	302
5.49	279
5.5	279
5.51	295
5.52	280
5.53	320
5.54	279
5.55	288
5.56	290
5.57	310
5.58	309
5.59	266
5.6	293
5.61	310
5.62	275
5.63	289
5.64	307
5.65	299
5.66	329
5.67	351
5.68	305
5.69	326
5.7	304
5.71	306
5.72	317
5.73	301
5.74	344
5.75	295
5.76	328
5.77	307
5.78	288
5.79	304
5.8	317
5.81	310
5.82	309
5.83	295
5.84	298
5.85	303
5.86	334
5.87	301
5.88	317
5.89	264
5.9	321
5.91	311
5.92	278
5.93	311
5.94	363
5.95	310
5.96	311
5.97	280
5.98	293
5.99	318
6	294
6.01	322
6.02	294
6.03	294
6.04	310
6.05	296
6.06	290
6.07	299
6.08	316
6.09	307
6.1	319
6.11	297
6.12	279
6.13	300
6.14	304
6.15	302
6.16	289
6.17	308
6.18	320
6.19	286
6.2	303
6.21	303
6.22	294
6.23	287
6.24	296
6.25	286
6.26	286
6.27	282
6.28	316
6.29	305
6.3	316
6.31	285
6.32	294
6.33	283
6.34	285
6.35	319
6.36	274
6.37	313
6.38	289
6.39	309
6.4	336
6.41	288
6.42	272
6.43	306
6.44	281
6.45	270
6.46	324
6.47	280
6.48	275
6.49	277
6.5	302
6.51	288
6.52	312
6.53	331
6.54	304
6.55	329
6.56	324
6.57	293
6.58	319
6.59	294
6.6	296
6.61	327
6.62	307
6.63	319
6.64	274
6.65	301
6.66	319
6.67	320
6.68	314
6.69	310
6.7	311
6.71	336
6.72	306
6.73	315
6.74	326
6.75	301
6.76	279
6.77	287
6.78	306
6.79	292
6.8	326
6.81	295
6.82	301
6.83	290
6.84	318
6.85	296
6.86	277
6.87	262
6.88	314
6.89	287
6.9	313
6.91	325
6.92	327
6.93	298
6.94	329
6.95	286
6.96	278
6.97	274
6.98	292
6.99	285
7	314
7.01	298
7.02	294
7.03	292
7.04	301
7.05	293
7.06	303
7.07	319
7.08	292
7.09	294
7.1	270
7.11	294
7.12	308
7.13	304
7.14	291
7.15	309
7.16	331
7.17	309
7.18	293
7.19	355
7.2	324
7.21	331
7.22	323
7.23	305
7.24	305
7.25	329
7.26	307
7.27	325
7.28	295
7.29	314
7.3	307
7.31	293
7.32	292
7.33	286
7.34	324
7.35	340
7.36	310
7.37	293
7.38	304
7.39	303
7.4	291
7.41	309
7.42	278
7.43	268
7.44	281
7.45	292
7.46	317
7.47	301
7.48	302
7.49	300
7.5	291
7.51	316
7.52	273
7.53	308
7.54	318
7.55	284
7.56	291
7.57	286
7.58	284
7.59	301
7.6	272
7.61	301
7.62	287
7.63	306
7.64	287
7.65	312
7.66	306
7.67	308
7.68	292
7.69	309
7.7	326
7.71	274
7.72	317
7.73	297
7.74	309
7.75	314
7.76	316
7.77	292
7.78	322
7.79	319
7.8	283
7.81	265
7.82	335
7.83	287
7.84	266
7.85	291
7.86	275
7.87	326
7.88	281
7.89	280
7.9	344
7.91	318
7.92	311
7.93	341
7.94	267
7.95	319
7.96	318
7.97	287
7.98	327
7.99	347
8	302
8.01	327
8.02	317
8.03	306
8.04	286
8.05	326
8.06	284
8.07	285
8.08	306
8.09	329
8.1	263
8.11	318
8.12	285
8.13	331
8.14	311
8.15	293
8.16	321
8.17	300
8.18	295
8.19	316
8.2	302
8.21	318
8.22	297
8.23	328
8.24	283
8.25	289
8.26	315
8.27	329
8.28	290
8.29	275
8.3	315
8.31	278
8.32	286
8.33	303
8.34	284
8.35	289
8.36	307
8.37	318
8.38	308
8.39	315
8.4	295
8.41	291
8.42	299
8.43	313
8.44	313
8.45	314
8.46	324
8.47	288
8.48	262
8.49	291
8.5	298
8.51	320
8.52	294
8.53	276
8.54	334
8.55	287
8.56	267
8.57	301
8.58	270
8.59	291
8.6	288
8.61	294
8.62	288
8.63	288
8.64	266
8.65	299
8.66	304
8.67	296
8.68	284
8.69	260
8.7	307
8.71	299
8.72	284
8.73	310
8.74	283
8.75	355
8.76	324
8.77	313
8.78	280
8.79	296
8.8	289
8.81	282
8.82	297
8.83	289
8.84	324
8.85	293
8.86	279
8.87	307
8.88	340
8.89	312
8.9	319
8.91	312
8.92	333
8.93	295
8.94	299
8.95	295
8.96	286
8.97	282
8.98	287
8.99	326
9	303
9.01	308
9.02	331
9.03	304
9.04	305
9.05	312
9.06	316
9.07	284
9.08	317
9.09	299
9.1	275
9.11	309
9.12	269
9.13	329
9.14	319
9.15	310
9.16	306
9.17	288
9.18	313
9.19	308
9.2	292
9.21	294
9.22	295
9.23	313
9.24	292
9.25	288
9.26	307
9.27	297
9.28	321
9.29	313
9.3	317
9.31	286
9.32	312
9.33	313
9.34	302
9.35	291
9.36	308
9.37	296
9.38	293
9.39	319
9.4	334
9.41	300
9.42	308
9.43	293
9.44	277
9.45	288
9.46	305
9.47	299
9.48	317
9.49	308
9.5	303
9.51	297
9.52	316
9.53	323
9.54	305
9.55	329
9.56	342
9.57	293
9.58	293
9.59	323
9.6	330
9.61	300
9.62	334
9.63	293
9.64	323
9.65	291
9.66	313
9.67	300
9.68	313
9.69	303
9.7	309
9.71	293
9.72	306
9.73	298
9.74	315
9.75	309
9.76	325
9.77	283
9.78	307
9.79	293
9.8	348
9.81	317
9.82	326
9.83	341
9.84	314
9.85	270
9.86	308
9.87	273
9.88	326
9.89	284
9.9	291
9.91	274
9.92	334
9.93	303
9.94	289
9.95	306
9.96	311
9.97	283
9.98	286
[truncated: 1 more rows]

## Sheet: Fig5
gene	FBgn ID	mRNA O1 vs B3	mRNA O3 vs B3	mRNA B3 old vs young	mRNA O1 old vs young	mRNA O3 old vs young	mRNA O ave	Protein O1 vs B3	Protein O3 vs B3	Protein B3 old vs young	Protein O1 old vs young	Protein O3 old vs young	Protein O ave
Obp44a	FBgn0033268	1.29203	1.91219	-0.226151	-0.178227	-0.32378	-0.251003	0.960499	0.84624	-0.58898	0.0177297	-0.0914676	-0.036869
CG9314	FBgn0032061	1.32659	1.86438	-0.714097	-0.335641	-2.16454	-1.25009	0.863555	0.968601	0.0588247	-0.143285	0.0251727	-0.059056
sxe2	FBgn0038398	1.38847	1.23626	-0.490676	-0.135027	-0.0618128	-0.0984201	0.793781	0.733762	0.124968	-0.123768	0.0544832	-0.0346425
S-Lap4	FBgn0052064	1.02962	2.10939	-2.38733	0.0687993	-2.25378	-1.09249	0.750159	0.819514	#DIV/0!	#DIV/0!	#DIV/0!	#DIV/0!
Hsp60B	FBgn0011244	1.17216	2.16586	-2.47266	-0.109207	-2.89835	-1.50378	0.736004	0.251953	#DIV/0!	#DIV/0!	#DIV/0!	#DIV/0!
CG6255	FBgn0038708	1.21997	1.82598	-0.862609	-0.155441	-2.40917	-1.28231	0.645086	0.676426	-0.186778	-0.666287	-0.668584	-0.667436
scpr-B	FBgn0037888	1.2127	2.40278	0.716674	-0.369336	-2.14148	-1.25541	0.280531	0.229862	#DIV/0!	-0.0905166	0.0449919	-0.0227623
Cyt-c-d	FBgn0086907	1.46369	2.07415	-0.281106	-0.585235	-2.71215	-1.64869	0.21934	-0.109965	-0.734239	-0.600739	-0.29711	-0.448925
to	FBgn0039298	2.30735	1.41438	0.0756307	0.00786728	-0.0887552	-0.040444	0.216392	-0.669302	#DIV/0!	#DIV/0!	#DIV/0!	#DIV/0!
betaTub85D	FBgn0003889	1.34941	2.37851	-1.9482	-0.0781377	-2.21993	-1.14903	0.0894496	0.108194	0.10633	0.113683	0.0907675	0.102225
CG9920	FBgn0038200	1.42458	2.06907	-0.16816	-0.217604	-1.23351	-0.725556	0.077388	-0.403483	-0.293753	-1.54079	-1.09187	-1.31633
CG9010	FBgn0034173	1.07965	1.88376	-2.62349	-0.363775	-3.02009	-1.69193	-0.000243735	-0.0673204	#DIV/0!	#DIV/0!	#DIV/0!	#DIV/0!
CG14305	FBgn0038630	1.16893	1.9376	-1.9828	-0.232651	-2.58097	-1.40681	-0.0615731	-0.0164484	#DIV/0!	#DIV/0!	#DIV/0!	#DIV/0!
CG10407	FBgn0038395	1.30042	2.2351	-0.24367	0.0829823	-0.530153	-0.223585	-0.0669152	0.880736	2.72258	1.08745	0.141286	0.61437
Hsp60C	FBgn0031728	1.40067	2.30756	-2.5576	-0.108861	-2.45907	-1.28397	-0.134509	-0.0711068	0.0418506	0.0894772	0.00849454	0.0489859
CG5089	FBgn0034144	1.0974	2.0286	-1.17659	0.00154219	-2.11297	-1.05571	-0.168037	0.136053	#DIV/0!	#DIV/0!	#DIV/0!	#DIV/0!
Pglym87	FBgn0011270	1.355	1.95691	-2.50159	-0.072907	-2.81799	-1.44545	-0.219365	-0.294174	-0.157859	-0.373777	-0.200105	-0.286941
CG7768	FBgn0036415	1.5865	1.4919	0.257653	-0.418377	-0.885698	-0.652037	-0.416224	-0.391881	0.133638	0.11335	0.256411	0.184881
TrxT	FBgn0029752	1.06358	2.00001	0.899264	-0.0389435	-1.16364	-0.601291	1.13079	0.389896	#DIV/0!	#DIV/0!	#DIV/0!	#DIV/0!
CG17349	FBgn0032771	1.15248	1.70184	-1.93256	-0.218419	-3.14419	-1.6813	1.12216	0.825489	#DIV/0!	#DIV/0!	#DIV/0!	#DIV/0!
S-Lap2	FBgn0052351	1.19815	2.18324	-1.17011	-0.0499433	-2.13969	-1.09482	1.05613	0.843059	#DIV/0!	#DIV/0!	#DIV/0!	#DIV/0!
smp-30	FBgn0038257	1.44901	1.20075	-0.291271	-0.0034658	0.133162	0.064848	0.99579	1.20957	-0.0764644	0.551191	0.88251	0.716851
CG6888	FBgn0036490	1.07619	1.77577	-1.6761	-0.67942	-3.10475	-1.89208	0.85286	1.08841	#DIV/0!	#DIV/0!	#DIV/0!	#DIV/0!
CG6628	FBgn0036072	1.30785	2.2498	-2.6531	-0.397701	-3.0701	-1.7339	0.815663	1.38093	#DIV/0!	#DIV/0!	#DIV/0!	#DIV/0!
LysP	FBgn0004429	2.47049	2.46973	-0.128976	0.0383112	0.066117	0.0522141	3.09593	2.95871	#DIV/0!	#DIV/0!	#DIV/0!	#DIV/0!
CG15434	FBgn0040705	1.54323	1.60208	-1.99312	-0.373515	-0.142092	-0.257803	3.09215	3.29454	0.0745046	-0.0482338	-0.143603	-0.0959184
CG16704	FBgn0031558	1.85099	1.60611	0.0344456	0.0577187	0.179219	0.118469	2.70649	2.32019	-0.177041	0.734194	1.07387	0.90403
Hsp26	FBgn0001225	2.64563	3.0628	0.66704	0.147048	-0.182604	-0.0177783	2.08937	2.21631	1.22293	0.291731	-0.0949179	0.0984064
CG16898	FBgn0034480	1.37008	1.44952	-0.420284	-0.0109488	0.0690895	0.0290703	2.07048	2.26036	0.127946	#DIV/0!	#DIV/0!	#DIV/0!
scpr-A	FBgn0037889	1.30516	2.55544	0.341319	-0.0308129	-2.18052	-1.10567	1.90307	2.09532	0.51382	0.074737	-0.262357	-0.0938098
S-Lap8	FBgn0034132	1.11742	2.09194	-1.86836	-0.030923	-2.23843	-1.13468	1.70349	1.82192	#DIV/0!	#DIV/0!	#DIV/0!	#DIV/0!
Cyp6a17	FBgn0015714	1.41932	1.03575	-0.155167	-0.0258338	0.00796408	-0.00893484	1.69351	1.46317	0.116088	-0.245786	-0.509823	-0.377805
dro4	FBgn0052282	1.93692	1.93397	-0.272317	-0.0679963	-0.085228	-0.0766121	1.69064	2.08214	-0.399389	0.35024	0.774548	0.562394
tobi	FBgn0261575	1.43892	1.02301	-0.0924019	0.0869892	0.170765	0.128877	1.68081	1.10585	-0.360241	0.247119	0.534236	0.390677
dro5	FBgn0035434	1.40052	1.4962	-0.12538	-0.0361419	-0.0415348	-0.0388384	1.62996	1.57434	#DIV/0!	#DIV/0!	#DIV/0!	#DIV/0!
CG34040	FBgn0054040	2.31243	1.90586	-0.226746	0.193331	0.24132	0.217326	1.57576	1.32096	-0.6968	1.01941	0.073179	0.546295
Cyp6a2	FBgn0000473	1.40264	1.30167	0.0541591	-0.0851826	-0.00447047	-0.0448265	1.5593	1.559	0.444686	-0.619588	-0.393166	-0.506377
Mal-B1	FBgn0032381	1.56193	1.77978	0.206461	0.146199	0.140061	0.14313	1.54477	1.33219	2.82443	0.534111	-0.35494	0.0895859
Iris	FBgn0031305	1.33032	1.27469	-0.0775013	0.0507783	0.148365	0.0995716	1.50548	1.37253	-0.50467	0.236754	0.40976	0.323257
CG18662	FBgn0040963	1.56332	2.3431	-1.39317	-0.201062	-2.16384	-1.18245	1.46103	1.70048	#DIV/0!	#DIV/0!	#DIV/0!	#DIV/0!
ocn	FBgn0041102	1.1905	2.0746	-1.96967	-0.130628	-2.22385	-1.17724	1.45128	1.79262	#DIV/0!	#DIV/0!	#DIV/0!	#DIV/0!
CG4434	FBgn0039071	1.01714	2.01708	-1.29256	-0.235128	-3.00029	-1.61771	1.43481	1.7217	0.413546	-0.279877	0.0729662	-0.103455
CG17928	FBgn0032603	1.46936	1.30641	-0.151685	-0.0604272	0.011987	-0.0242201	1.36271	1.04567	#DIV/0!	#DIV/0!	#DIV/0!	#DIV/0!
CG4546	FBgn0038373	1.164	1.89802	-0.6798	-0.23702	-1.29603	-0.766525	1.33288	1.61208	0.849777	0.0303998	0.262458	0.146429
CG33340	FBgn0053340	1.31737	2.21689	-2.74903	-0.0280528	-2.23467	-1.13136	1.30459	1.55608	#DIV/0!	#DIV/0!	#DIV/0!	#DIV/0!
S-Lap1	FBgn0035915	1.06965	2.09039	-1.36096	0.0725896	-1.81811	-0.872762	1.27338	1.23549	#DIV/0!	#DIV/0!	#DIV/0!	#DIV/0!
Cyp12d1-d	FBgn0053503	1.25247	2.38643	-0.310269	-0.163443	-0.0619665	-0.112705	1.27063	2.49531	-0.0834664	-0.0463285	0.0560061	0.00483876
Cyp12d1-p	FBgn0050489	1.24642	1.86314	-0.185552	-0.12535	-0.0651359	-0.0952432	1.25849	2.4333	#DIV/0!	#DIV/0!	#DIV/0!	#DIV/0!
S-Lap7	FBgn0033868	1.16445	2.10203	-1.99796	0.0406296	-2.14862	-1.054	1.23605	1.47555	#DIV/0!	#DIV/0!	#DIV/0!	#DIV/0!
S-Lap3	FBgn0045770	1.28272	2.30507	-2.29154	-0.0723088	-2.67923	-1.37577	1.20994	1.26979	#DIV/0!	#DIV/0!	#DIV/0!	#DIV/0!
CG11043	FBgn0031831	1.15618	1.51369	0.195211	-0.246098	-0.649588	-0.447843	1.18905	1.27006	#DIV/0!	#DIV/0!	#DIV/0!	#DIV/0!
loopin-1	FBgn0259795	1.40516	2.44183	-1.69187	0.0202587	-2.227	-1.10337	1.12104	1.36879	-0.230346	-0.182373	-0.922987	-0.55268
CG10252	FBgn0039104	1.29435	2.02203	-2.03674	0.0820305	-2.16408	-1.04103	1.07872	1.66104	#DIV/0!	#DIV/0!	#DIV/0!	#DIV/0!
CG8813	FBgn0031476	1.01438	1.55579	-0.00888207	-0.242549	-1.29565	-0.769101	1.07644	1.44186	#DIV/0!	#DIV/0!	#DIV/0!	#DIV/0!
Porin2	FBgn0069354	1.459	1.56609	-1.60106	-0.611176	-2.11735	-1.36426	1.07531	1.71105	0.0816194	-0.313974	-0.52738	-0.420677
CG32445	FBgn0052445	1.1343	1.86575	-2.48714	-0.191431	-3.14121	-1.66632	1.03217	1.58088	#DIV/0!	#DIV/0!	#DIV/0!	#DIV/0!
Cyp6a20	FBgn0033980	1.41569	1.26656	0.0376322	-0.0678923	-0.057454	-0.0626732	-2.50927	-0.799636	-0.816945	1.91083	0.0995715	1.0052
CheB38a	FBgn0067312	3.07861	1.42586	-0.399476	0.110296	0.405687	0.257991	#N/A	#N/A	#N/A	#N/A	#N/A	#N/A
CG15263	FBgn0028853	3.59985	2.61528	-1.18065	0.0181647	0.303153	0.160659	#N/A	#N/A	#N/A	#N/A	#N/A	#N/A
CG34456	FBgn0085485	1.05202	1.43936	-0.118254	0.120057	0.288074	0.204066	#N/A	#N/A	#N/A	#N/A	#N/A	#N/A
CheA86a	FBgn0261291	1.81164	1.63389	-0.21216	0.178262	0.170419	0.174341	#N/A	#N/A	#N/A	#N/A	#N/A	#N/A
tim	FBgn0014396	1.5755	1.05427	0.118302	0.0362881	0.119561	0.0779247	#N/A	#N/A	#N/A	#N/A	#N/A	#N/A
MtnE	FBgn0262146	1.36084	1.37945	-0.168803	0.205004	0.0637071	0.134355	#N/A	#N/A	#N/A	#N/A	#N/A	#N/A
CG43680	FBgn0263763	1.43298	2.44741	-0.188604	0.0956132	0.0464384	0.0710258	#N/A	#N/A	#N/A	#N/A	#N/A	#N/A
CG18302	FBgn0032266	1.74654	1.68589	-0.758307	-0.194313	0.0253359	-0.0844885	#N/A	#N/A	#N/A	#N/A	#N/A	#N/A
CG14893	FBgn0038451	2.88507	2.15381	-0.271758	-1.39001	-0.0451332	-0.717573	#N/A	#N/A	#N/A	#N/A	#N/A	#N/A
LysD	FBgn0004427	1.07196	1.10838	-1.93487	-0.179543	-0.106109	-0.142826	#N/A	#N/A	#N/A	#N/A	#N/A	#N/A
LysE	FBgn0004428	1.59385	1.77849	-1.86337	-0.347677	-0.275339	-0.311508	#N/A	#N/A	#N/A	#N/A	#N/A	#N/A
Try29F	FBgn0015316	2.0563	1.39128	-0.68849	-0.144169	-0.365402	-0.254786	#N/A	#N/A	#N/A	#N/A	#N/A	#N/A
tRNA:G3:22BCa	FBgn0011859	1.41145	1.39327	0.0710516	-0.278436	-0.412933	-0.345685	#N/A	#N/A	#N/A	#N/A	#N/A	#N/A
CG9192	FBgn0035193	3.65066	3.005	0.1498	-0.482657	-0.46789	-0.475274	#N/A	#N/A	#N/A	#N/A	#N/A	#N/A
Fhos	FBgn0261259	1.08455	1.25583	-0.193556	-0.40038	-0.528658	-0.464519	#N/A	#N/A	#N/A	#N/A	#N/A	#N/A
CG33293	FBgn0053293	1.01319	1.73007	0.214531	-0.176149	-0.72466	-0.450404	#N/A	#N/A	#N/A	#N/A	#N/A	#N/A
CG15711	FBgn0034122	1.09402	1.66338	-1.16672	-0.536546	-0.818107	-0.677327	#N/A	#N/A	#N/A	#N/A	#N/A	#N/A
CG9642	FBgn0034183	1.29695	1.27267	-0.0481226	-0.303272	-0.851319	-0.577296	#N/A	#N/A	#N/A	#N/A	#N/A	#N/A
scpr-C	FBgn0037879	1.24274	2.20019	0.797415	-0.0140515	-0.880281	-0.447166	#N/A	#N/A	#N/A	#N/A	#N/A	#N/A
CG34241	FBgn0250825	1.17869	2.07982	-1.55771	-0.191311	-0.920585	-0.555948	#N/A	#N/A	#N/A	#N/A	#N/A	#N/A
CG17717	FBgn0029877	1.11901	1.25528	0.301356	-0.427555	-0.98441	-0.705982	#N/A	#N/A	#N/A	#N/A	#N/A	#N/A
CG31538	FBgn0051538	1.00157	1.93794	-0.157255	-0.104517	-1.0435	-0.574006	#N/A	#N/A	#N/A	#N/A	#N/A	#N/A
Pen	FBgn0011823	1.0995	1.85088	-0.565878	-0.117564	-1.21197	-0.664769	#N/A	#N/A	#N/A	#N/A	#N/A	#N/A
CG15109	FBgn0034416	1.63256	2.90094	-0.540295	-0.493661	-1.23836	-0.86601	#N/A	#N/A	#N/A	#N/A	#N/A	#N/A
CG12309	FBgn0033542	1.09306	1.71448	0.00675166	-0.56866	-1.43848	-1.00357	#N/A	#N/A	#N/A	#N/A	#N/A	#N/A
CR32658	FBgn0040859	1.32432	2.05265	-0.913676	-0.144491	-1.49158	-0.818037	#N/A	#N/A	#N/A	#N/A	#N/A	#N/A
CG5538	FBgn0038052	1.26973	2.32096	-0.170009	-0.0917996	-1.53516	-0.813479	#N/A	#N/A	#N/A	#N/A	#N/A	#N/A
CG34457	FBgn0085486	1.01252	1.80585	-0.581069	-0.691337	-1.53708	-1.11421	#N/A	#N/A	#N/A	#N/A	#N/A	#N/A
CG8136	FBgn0037616	1.2522	1.83622	-0.599357	-0.241986	-1.60913	-0.925558	#N/A	#N/A	#N/A	#N/A	#N/A	#N/A
CG10396	FBgn0033020	1.31921	2.00446	-0.886874	-0.346927	-1.61063	-0.97878	#N/A	#N/A	#N/A	#N/A	#N/A	#N/A
CG17376	FBgn0042189	1.16038	1.99293	-1.70284	0.0760588	-1.62073	-0.772333	#N/A	#N/A	#N/A	#N/A	#N/A	#N/A
CG12699	FBgn0046294	1.10694	1.96155	-1.70309	0.0412368	-1.66401	-0.811386	#N/A	#N/A	#N/A	#N/A	#N/A	#N/A
CG17377	FBgn0031859	1.22698	2.03515	-2.24873	0.0276801	-1.679	-0.825658	#N/A	#N/A	#N/A	#N/A	#N/A	#N/A
CG5048	FBgn0036437	1.07432	1.75771	-0.701273	-0.42294	-1.68698	-1.05496	#N/A	#N/A	#N/A	#N/A	#N/A	#N/A
CG17261	FBgn0031501	1.11394	1.7201	-0.861102	-0.104229	-1.688	-0.896115	#N/A	#N/A	#N/A	#N/A	#N/A	#N/A
CG18335	FBgn0033610	1.01152	1.86183	-0.862835	-0.302539	-1.70503	-1.00378	#N/A	#N/A	#N/A	#N/A	#N/A	#N/A
CG3982	FBgn0035988	1.15246	2.00898	-0.972539	-0.18727	-1.7067	-0.946984	#N/A	#N/A	#N/A	#N/A	#N/A	#N/A
CG8526	FBgn0037759	1.0882	1.92986	-0.389692	-0.246718	-1.72626	-0.986488	#N/A	#N/A	#N/A	#N/A	#N/A	#N/A
CG18810	FBgn0042133	1.09733	1.79028	0.849673	-0.555978	-1.73435	-1.14516	#N/A	#N/A	#N/A	#N/A	#N/A	#N/A
CG31909	FBgn0051909	1.29019	1.83616	-0.15258	-0.812884	-1.77485	-1.29387	#N/A	#N/A	#N/A	#N/A	#N/A	#N/A
tomboy40	FBgn0033074	1.00738	1.7495	-0.524763	-0.186379	-1.80251	-0.994444	#N/A	#N/A	#N/A	#N/A	#N/A	#N/A
CR42767	FBgn0261835	1.29024	2.08382	0.644717	-0.384957	-1.84731	-1.11614	#N/A	#N/A	#N/A	#N/A	#N/A	#N/A
CG31178	FBgn0064912	1.09855	1.92274	-0.894673	-0.234685	-1.85096	-1.04282	#N/A	#N/A	#N/A	#N/A	#N/A	#N/A
CG12853	FBgn0040747	1.59894	1.99266	-1.06284	-0.253834	-1.85303	-1.05343	#N/A	#N/A	#N/A	#N/A	#N/A	#N/A
Mst77F	FBgn0086915	1.59319	2.29096	-1.32183	-0.208012	-1.86331	-1.03566	#N/A	#N/A	#N/A	#N/A	#N/A	#N/A
CG4836	FBgn0038762	1.44105	2.26472	-1.34962	-0.0318126	-1.88218	-0.956997	#N/A	#N/A	#N/A	#N/A	#N/A	#N/A
CG31287	FBgn0051287	1.25719	1.61661	-0.635811	-0.546148	-1.88245	-1.2143	#N/A	#N/A	#N/A	#N/A	#N/A	#N/A
CG43121	FBgn0262581	1.00531	1.75645	-0.784624	-0.373814	-1.88301	-1.12841	#N/A	#N/A	#N/A	#N/A	#N/A	#N/A
CG31788	FBgn0051788	1.23735	2.19614	-1.79382	-0.136609	-1.8916	-1.0141	#N/A	#N/A	#N/A	#N/A	#N/A	#N/A
CG15219	FBgn0040519	1.54872	2.27375	-2.18266	0.0282024	-1.91784	-0.944818	#N/A	#N/A	#N/A	#N/A	#N/A	#N/A
Mst87F	FBgn0002862	1.26345	1.87187	-1.58551	-0.0131546	-1.95994	-0.986548	#N/A	#N/A	#N/A	#N/A	#N/A	#N/A
CG31740	FBgn0051740	1.28616	2.02274	-2.66258	0.0710034	-1.96754	-0.948267	#N/A	#N/A	#N/A	#N/A	#N/A	#N/A
CG31226	FBgn0051226	1.35169	2.11311	-1.96077	0.0516149	-1.98272	-0.96555	#N/A	#N/A	#N/A	#N/A	#N/A	#N/A
CG34168	FBgn0085197	1.1668	1.90049	-2.08106	0.0543063	-1.98643	-0.966064	#N/A	#N/A	#N/A	#N/A	#N/A	#N/A
CG31907	FBgn0051907	1.00443	1.90735	-0.248504	-0.42277	-1.99387	-1.20832	#N/A	#N/A	#N/A	#N/A	#N/A	#N/A
CG9632	FBgn0038377	1.01226	1.64268	-0.6315	-0.289335	-2.01265	-1.15099	#N/A	#N/A	#N/A	#N/A	#N/A	#N/A
CG34107	FBgn0083943	1.14465	1.95768	-0.712804	-0.313599	-2.02054	-1.16707	#N/A	#N/A	#N/A	#N/A	#N/A	#N/A
Ppi1	FBgn0051025	1.07903	2.19905	-1.54936	-0.0762843	-2.03476	-1.05552	#N/A	#N/A	#N/A	#N/A	#N/A	#N/A
CG7131	FBgn0038598	1.15099	2.1177	-0.239645	-0.167137	-2.03947	-1.1033	#N/A	#N/A	#N/A	#N/A	#N/A	#N/A
CG17470	FBgn0032869	1.47657	2.30798	-2.18188	-0.162878	-2.05622	-1.10955	#N/A	#N/A	#N/A	#N/A	#N/A	#N/A
CG30093	FBgn0050093	1.40732	1.55546	-1.19207	-0.531142	-2.06314	-1.29714	#N/A	#N/A	#N/A	#N/A	#N/A	#N/A
CG32192	FBgn0052192	1.25998	1.8934	-1.57929	-0.224095	-2.07313	-1.14861	#N/A	#N/A	#N/A	#N/A	#N/A	#N/A
CG14835	FBgn0035782	1.0084	1.76558	-0.585304	-0.284088	-2.07378	-1.17893	#N/A	#N/A	#N/A	#N/A	#N/A	#N/A
CR17567	FBgn0040994	1.24039	2.15253	-2.41525	0.0647666	-2.08887	-1.01205	#N/A	#N/A	#N/A	#N/A	#N/A	#N/A
CG43277	FBgn0262966	1.06227	1.35122	-1.17729	-0.718961	-2.09773	-1.40835	#N/A	#N/A	#N/A	#N/A	#N/A	#N/A
CR32661	FBgn0030356	1.1474	1.95509	-0.521104	-0.121957	-2.134	-1.12798	#N/A	#N/A	#N/A	#N/A	#N/A	#N/A
CG9016	FBgn0031751	1.16692	2.14446	-1.76482	0.119028	-2.14072	-1.01084	#N/A	#N/A	#N/A	#N/A	#N/A	#N/A
Mst84Dd	FBgn0004175	1.49803	2.16462	-2.29332	-0.0169759	-2.15965	-1.08832	#N/A	#N/A	#N/A	#N/A	#N/A	#N/A
CG17819	FBgn0038915	1.02323	1.4879	-0.274922	-0.832359	-2.16264	-1.4975	#N/A	#N/A	#N/A	#N/A	#N/A	#N/A
CG6652	FBgn0036687	1.00467	2.02254	-0.605715	-0.216181	-2.1894	-1.20279	#N/A	#N/A	#N/A	#N/A	#N/A	#N/A
Mst84Dc	FBgn0004174	1.24118	1.90271	-2.01083	-0.000570371	-2.21335	-1.10696	#N/A	#N/A	#N/A	#N/A	#N/A	#N/A
CG5539	FBgn0034907	1.17889	1.82537	-0.619859	-0.276504	-2.21854	-1.24752	#N/A	#N/A	#N/A	#N/A	#N/A	#N/A
CG7046	FBgn0038979	1.34574	2.22019	-1.07582	-0.274582	-2.22844	-1.25151	#N/A	#N/A	#N/A	#N/A	#N/A	#N/A
CG30039	FBgn0050039	1.24157	1.99475	-2.68346	-0.270101	-2.22886	-1.24948	#N/A	#N/A	#N/A	#N/A	#N/A	#N/A
CG32652	FBgn0052652	1.09668	2.07431	-2.46702	0.0351617	-2.22892	-1.09688	#N/A	#N/A	#N/A	#N/A	#N/A	#N/A
CR43157	FBgn0262687	1.1558	1.7367	-0.227983	-0.341592	-2.24887	-1.29523	#N/A	#N/A	#N/A	#N/A	#N/A	#N/A
CG31639	FBgn0051639	1.25049	2.13833	-2.08507	0.0107119	-2.24954	-1.11942	#N/A	#N/A	#N/A	#N/A	#N/A	#N/A
CR32690	FBgn0052690	1.01105	1.81091	-1.88212	-0.323718	-2.29169	-1.3077	#N/A	#N/A	#N/A	#N/A	#N/A	#N/A
CG7045	FBgn0038978	1.56766	2.33838	-0.772093	-0.382795	-2.29924	-1.34102	#N/A	#N/A	#N/A	#N/A	#N/A	#N/A
dj	FBgn0019828	1.22965	2.14081	-2.75706	-0.14031	-2.30399	-1.22215	#N/A	#N/A	#N/A	#N/A	#N/A	#N/A
CG32371	FBgn0052371	1.13147	1.93944	-1.57959	-0.0282822	-2.31268	-1.17048	#N/A	#N/A	#N/A	#N/A	#N/A	#N/A
CG31948	FBgn0051948	1.51693	2.26976	-2.72106	-0.0457347	-2.31284	-1.17929	#N/A	#N/A	#N/A	#N/A	#N/A	#N/A
CG3345	FBgn0031240	1.07622	1.92169	-0.661464	-0.195888	-2.31987	-1.25788	#N/A	#N/A	#N/A	#N/A	#N/A	#N/A
CG31820	FBgn0051820	1.48825	2.12383	-2.75185	-0.0131876	-2.3226	-1.16789	#N/A	#N/A	#N/A	#N/A	#N/A	#N/A
robl62A	FBgn0028567	1.17291	2.06893	-1.68792	-0.315176	-2.32634	-1.32076	#N/A	#N/A	#N/A	#N/A	#N/A	#N/A
CG12860	FBgn0033954	1.24391	2.10642	-2.01456	0.0856168	-2.32771	-1.12105	#N/A	#N/A	#N/A	#N/A	#N/A	#N/A
CG18449	FBgn0033285	1.23441	2.00702	-2.24715	-0.0484243	-2.33013	-1.18928	#N/A	#N/A	#N/A	#N/A	#N/A	#N/A
CG10859	FBgn0032520	1.17179	1.98418	-1.7089	-0.249808	-2.3345	-1.29216	#N/A	#N/A	#N/A	#N/A	#N/A	#N/A
CG43922	FBgn0264543	1.0845	1.56634	-0.888451	-0.632444	-2.33524	-1.48384	#N/A	#N/A	#N/A	#N/A	#N/A	#N/A
ymp	FBgn0261287	1.06628	1.859	-0.906799	-0.349829	-2.33722	-1.34352	#N/A	#N/A	#N/A	#N/A	#N/A	#N/A
Mst84Db	FBgn0004173	1.49672	1.91297	-2.3899	0.0445569	-2.3395	-1.14747	#N/A	#N/A	#N/A	#N/A	#N/A	#N/A
CG15306	FBgn0030191	1.29685	2.21837	-0.516323	-0.400365	-2.346	-1.37318	#N/A	#N/A	#N/A	#N/A	#N/A	#N/A
CG8517	FBgn0034472	1.27549	2.18192	-1.90393	-0.048472	-2.3476	-1.19804	#N/A	#N/A	#N/A	#N/A	#N/A	#N/A
CG8840	FBgn0031531	1.287	1.91483	-0.956526	-0.490211	-2.35566	-1.42293	#N/A	#N/A	#N/A	#N/A	#N/A	#N/A
Dpy-30L2	FBgn0035491	1.4968	2.27862	-0.708295	-0.231878	-2.35636	-1.29412	#N/A	#N/A	#N/A	#N/A	#N/A	#N/A
CG12470	FBgn0040371	1.05231	2.04191	-0.785713	-0.145851	-2.35709	-1.25147	#N/A	#N/A	#N/A	#N/A	#N/A	#N/A
CG31206	FBgn0051206	1.15467	1.86462	-2.03393	-0.336226	-2.38221	-1.35922	#N/A	#N/A	#N/A	#N/A	#N/A	#N/A
CG3330	FBgn0039511	1.23146	2.10915	-2.53334	-0.0773634	-2.38648	-1.23192	#N/A	#N/A	#N/A	#N/A	#N/A	#N/A
CG12861	FBgn0033953	1.37459	2.41672	-2.31735	-0.008824	-2.39619	-1.20251	#N/A	#N/A	#N/A	#N/A	#N/A	#N/A
CG14658	FBgn0037283	1.40755	1.923	-1.7518	-0.474554	-2.40963	-1.44209	#N/A	#N/A	#N/A	#N/A	#N/A	#N/A
CG32436	FBgn0052436	1.14536	2.00738	-1.41208	-0.191726	-2.41142	-1.30157	#N/A	#N/A	#N/A	#N/A	#N/A	#N/A
CG12907	FBgn0250840	1.33673	2.22363	-2.44796	-0.119047	-2.42718	-1.27311	#N/A	#N/A	#N/A	#N/A	#N/A	#N/A
CG1394	FBgn0030277	1.1166	1.88183	-1.62996	-0.143417	-2.43099	-1.28721	#N/A	#N/A	#N/A	#N/A	#N/A	#N/A
CG8701	FBgn0033287	1.35599	2.26091	-2.05612	0.0577142	-2.43928	-1.19078	#N/A	#N/A	#N/A	#N/A	#N/A	#N/A
CG4218	FBgn0250844	1.17638	1.92379	-2.16716	-0.213638	-2.44189	-1.32776	#N/A	#N/A	#N/A	#N/A	#N/A	#N/A
CG32148	FBgn0047338	1.01029	1.52282	-2.06248	-0.270209	-2.4423	-1.35625	#N/A	#N/A	#N/A	#N/A	#N/A	#N/A
CG30376	FBgn0050376	1.13154	2.1215	-2.53255	-0.0204471	-2.44268	-1.23156	#N/A	#N/A	#N/A	#N/A	#N/A	#N/A
CG10734	FBgn0034082	1.28492	2.23912	-1.55223	-0.232257	-2.45453	-1.34339	#N/A	#N/A	#N/A	#N/A	#N/A	#N/A
CG34170	FBgn0085199	1.10012	1.42635	-1.09973	-0.606419	-2.46114	-1.53378	#N/A	#N/A	#N/A	#N/A	#N/A	#N/A
Mst98Ca	FBgn0002865	1.32341	2.15317	-2.44318	0.029554	-2.46276	-1.2166	#N/A	#N/A	#N/A	#N/A	#N/A	#N/A
CG32141	FBgn0052141	1.26439	2.14402	-0.732182	-0.104809	-2.4779	-1.29135	#N/A	#N/A	#N/A	#N/A	#N/A	#N/A
CG3124	FBgn0034840	1.11003	2.12609	-1.82252	0.0391663	-2.51669	-1.23876	#N/A	#N/A	#N/A	#N/A	#N/A	#N/A
CG31644	FBgn0051644	1.1645	2.01419	-1.57995	-0.373402	-2.52036	-1.44688	#N/A	#N/A	#N/A	#N/A	#N/A	#N/A
CG42688	FBgn0261578	1.11131	1.90479	-2.75933	-0.00402718	-2.53387	-1.26895	#N/A	#N/A	#N/A	#N/A	#N/A	#N/A
CG2127	FBgn0033286	1.18632	2.21809	-2.37848	0.0581925	-2.55218	-1.24699	#N/A	#N/A	#N/A	#N/A	#N/A	#N/A
CG43278	FBgn0262967	1.4245	2.08861	-0.230878	-0.913738	-2.5539	-1.73382	#N/A	#N/A	#N/A	#N/A	#N/A	#N/A
CG34160	FBgn0250826	1.03797	1.61357	-1.30322	-0.322425	-2.56298	-1.4427	#N/A	#N/A	#N/A	#N/A	#N/A	#N/A
CG30430	FBgn0050430	1.19239	1.86395	-2.55385	-0.0738751	-2.56759	-1.32073	#N/A	#N/A	#N/A	#N/A	#N/A	#N/A
CG43638	FBgn0263647	1.39803	2.02324	-2.38047	-0.189603	-2.58083	-1.38522	#N/A	#N/A	#N/A	#N/A	#N/A	#N/A
janB	FBgn0001281	1.42995	2.1113	-0.960757	-0.185907	-2.58712	-1.38651	#N/A	#N/A	#N/A	#N/A	#N/A	#N/A
CG3213	FBgn0031545	1.21606	2.19371	-1.84575	0.0233191	-2.5874	-1.28204	#N/A	#N/A	#N/A	#N/A	#N/A	#N/A
CG9389	FBgn0037064	1.13657	1.82995	-1.46499	-0.186444	-2.59831	-1.39238	#N/A	#N/A	#N/A	#N/A	#N/A	#N/A
CG14297	FBgn0038655	1.29075	2.0348	-0.663218	-0.209159	-2.60529	-1.40722	#N/A	#N/A	#N/A	#N/A	#N/A	#N/A
CG42355	FBgn0259701	1.31184	1.91818	0.504399	-0.332357	-2.60739	-1.46987	#N/A	#N/A	#N/A	#N/A	#N/A	#N/A
CG31949	FBgn0051949	1.05994	1.54642	-0.448197	-0.778325	-2.63006	-1.70419	#N/A	#N/A	#N/A	#N/A	#N/A	#N/A
djl	FBgn0037463	1.17405	1.92726	-1.54018	-0.170624	-2.63782	-1.40422	#N/A	#N/A	#N/A	#N/A	#N/A	#N/A
CG5968	FBgn0032588	1.23549	2.08304	-1.5701	-0.192941	-2.64845	-1.4207	#N/A	#N/A	#N/A	#N/A	#N/A	#N/A
CG11106	FBgn0030280	1.08237	1.82712	-1.80799	-0.313806	-2.65024	-1.48203	#N/A	#N/A	#N/A	#N/A	#N/A	#N/A
CG15200	FBgn0030278	1.04203	2.02273	-1.34234	-0.0394504	-2.65576	-1.34761	#N/A	#N/A	#N/A	#N/A	#N/A	#N/A
tomboy20	FBgn0037828	1.40263	2.08194	-1.96718	-0.352163	-2.66432	-1.50824	#N/A	#N/A	#N/A	#N/A	#N/A	#N/A
CG14391	FBgn0038078	1.03581	1.44514	-0.658659	-0.685036	-2.66994	-1.67749	#N/A	#N/A	#N/A	#N/A	#N/A	#N/A
CG42393	FBgn0259739	1.02352	1.80952	-1.92833	-0.236263	-2.67295	-1.45461	#N/A	#N/A	#N/A	#N/A	#N/A	#N/A
Grx-1	FBgn0034658	1.09251	1.89723	-1.7481	-0.355895	-2.67423	-1.51506	#N/A	#N/A	#N/A	#N/A	#N/A	#N/A
CG11327	FBgn0031849	1.11504	2.02244	-0.92332	-0.329491	-2.67928	-1.50439	#N/A	#N/A	#N/A	#N/A	#N/A	#N/A
CG14718	FBgn0037939	1.07957	2.08417	-2.51018	-0.154829	-2.68628	-1.42055	#N/A	#N/A	#N/A	#N/A	#N/A	#N/A
CG1288	FBgn0250845	1.30399	2.31587	-2.92632	-0.195132	-2.68768	-1.44141	#N/A	#N/A	#N/A	#N/A	#N/A	#N/A
CG32240	FBgn0052240	1.30656	2.09649	-1.70679	-0.256294	-2.68875	-1.47252	#N/A	#N/A	#N/A	#N/A	#N/A	#N/A
CG15034	FBgn0029946	1.03405	1.75538	-2.49803	-0.351224	-2.71141	-1.53131	#N/A	#N/A	#N/A	#N/A	#N/A	#N/A
CG31709	FBgn0051709	1.12585	1.98551	-2.21026	-0.224034	-2.71451	-1.46927	#N/A	#N/A	#N/A	#N/A	#N/A	#N/A
CG43755	FBgn0264086	1.17472	2.11785	-0.935425	-0.121209	-2.72351	-1.42236	#N/A	#N/A	#N/A	#N/A	#N/A	#N/A
CG5762	FBgn0039190	1.05337	1.9693	-2.04677	-0.0659231	-2.73207	-1.399	#N/A	#N/A	#N/A	#N/A	#N/A	#N/A
CR9284	FBgn0046297	1.27822	2.08604	-2.43484	-0.0347004	-2.74186	-1.38828	#N/A	#N/A	#N/A	#N/A	#N/A	#N/A
CG2291	FBgn0033279	1.02573	1.69154	-2.25714	-0.530845	-2.74949	-1.64017	#N/A	#N/A	#N/A	#N/A	#N/A	#N/A
Mst98Cb	FBgn0004171	1.12687	2.01638	-1.99273	-0.18587	-2.75374	-1.4698	#N/A	#N/A	#N/A	#N/A	#N/A	#N/A
Mst35Ba	FBgn0013300	1.31822	2.03183	-1.83946	-0.166327	-2.75584	-1.46108	#N/A	#N/A	#N/A	#N/A	#N/A	#N/A
sowi	FBgn0037460	1.03297	1.64898	-2.05818	-0.277618	-2.76185	-1.51974	#N/A	#N/A	#N/A	#N/A	#N/A	#N/A
CG2955	FBgn0031585	1.4533	2.52307	-1.4565	-0.224821	-2.76369	-1.49425	#N/A	#N/A	#N/A	#N/A	#N/A	#N/A
CG15425	FBgn0031591	1.18733	1.83535	-1.32823	-0.331579	-2.77126	-1.55142	#N/A	#N/A	#N/A	#N/A	#N/A	#N/A
CG31050	FBgn0051050	1.36195	1.91904	-0.715329	-0.43654	-2.77491	-1.60572	#N/A	#N/A	#N/A	#N/A	#N/A	#N/A
eIF4E-5	FBgn0035823	1.17479	1.96832	-2.17338	-0.16723	-2.777	-1.47211	#N/A	#N/A	#N/A	#N/A	#N/A	#N/A
CG33284	FBgn0053284	1.32181	2.15603	-2.45262	-0.20937	-2.77911	-1.49424	#N/A	#N/A	#N/A	#N/A	#N/A	#N/A
CG42659	FBgn0261531	1.17519	2.12276	-1.71971	-0.331191	-2.78752	-1.55936	#N/A	#N/A	#N/A	#N/A	#N/A	#N/A
CG13898	FBgn0035161	1.24297	2.05872	-1.20775	-0.175375	-2.79058	-1.48298	#N/A	#N/A	#N/A	#N/A	#N/A	#N/A
hydra	FBgn0031128	1.12943	1.77243	-1.27565	-0.345982	-2.79106	-1.56852	#N/A	#N/A	#N/A	#N/A	#N/A	#N/A
CG12027	FBgn0035585	2.28807	1.63675	0.247479	-0.367836	-2.80176	-1.5848	#N/A	#N/A	#N/A	#N/A	#N/A	#N/A
CG30192	FBgn0050192	1.10493	1.54471	-1.5574	-0.845793	-2.802	-1.8239	#N/A	#N/A	#N/A	#N/A	#N/A	#N/A
CG4691	FBgn0028870	1.09095	2.02534	-2.17267	-0.16127	-2.80269	-1.48198	#N/A	#N/A	#N/A	#N/A	#N/A	#N/A
CG1999	FBgn0029947	1.08711	1.97835	-1.77578	-0.228514	-2.80477	-1.51664	#N/A	#N/A	#N/A	#N/A	#N/A	#N/A
w-cup	FBgn0032269	1.03734	2.13122	-2.89441	-0.0437239	-2.80752	-1.42562	#DIV/0!	#DIV/0!	#DIV/0!	#DIV/0!	#DIV/0!	#DIV/0!
CG9975	FBgn0034435	1.17689	1.86997	-1.26242	-0.174119	-2.82456	-1.49934	#N/A	#N/A	#N/A	#N/A	#N/A	#N/A
Tpl94D	FBgn0051281	1.07063	1.96278	-1.66707	-0.31671	-2.83432	-1.57552	#N/A	#N/A	#N/A	#N/A	#N/A	#N/A
CG10919	FBgn0037514	1.0864	1.854	-1.49196	-0.318193	-2.85507	-1.58663	#N/A	#N/A	#N/A	#N/A	#N/A	#N/A
soti	FBgn0038225	1.22185	2.09883	-0.828846	-0.460308	-2.86267	-1.66149	#N/A	#N/A	#N/A	#N/A	#N/A	#N/A
Atg8b	FBgn0038539	1.28779	1.999	-1.54702	-0.61009	-2.89883	-1.75446	#N/A	#N/A	#N/A	#N/A	#N/A	#N/A
Mst33A	FBgn0028412	1.34494	2.20184	-2.16435	-0.28043	-2.91039	-1.59541	#N/A	#N/A	#N/A	#N/A	#N/A	#N/A
CG15510	FBgn0039707	1.11837	1.65741	-0.60844	-0.802015	-2.9171	-1.85956	#N/A	#N/A	#N/A	#N/A	#N/A	#N/A
CG31007	FBgn0051007	1.08255	1.73171	-1.80557	-0.26675	-2.91858	-1.59266	#N/A	#N/A	#N/A	#N/A	#N/A	#N/A
CG16782	FBgn0029659	1.18396	1.94148	-1.44651	-0.184552	-2.92057	-1.55256	#N/A	#N/A	#N/A	#N/A	#N/A	#N/A
eIF4E-4	FBgn0035709	1.06031	1.8963	-2.59151	-0.231297	-2.92488	-1.57809	#N/A	#N/A	#N/A	#N/A	#N/A	#N/A
CG4286	FBgn0034601	1.26887	1.93111	-1.69948	-0.146988	-2.93707	-1.54203	#N/A	#N/A	#N/A	#N/A	#N/A	#N/A
CG5614	FBgn0038359	1.17825	2.01271	-2.43304	-0.174795	-2.94412	-1.55946	#N/A	#N/A	#N/A	#N/A	#N/A	#N/A
CG42853	FBgn0262100	1.30542	1.98301	-1.15675	-0.399675	-2.94574	-1.67271	#N/A	#N/A	#N/A	#N/A	#N/A	#N/A
Tim17b2	FBgn0020371	1.22349	2.10883	-1.83763	-0.17781	-2.94795	-1.56288	#N/A	#N/A	#N/A	#N/A	#N/A	#N/A
CG2113	FBgn0035384	1.07985	1.71097	-1.40002	-0.320396	-2.96164	-1.64102	#N/A	#N/A	#N/A	#N/A	#N/A	#N/A
CG5217	FBgn0038694	1.07021	1.96162	-2.04337	-0.270769	-2.96242	-1.6166	#N/A	#N/A	#N/A	#N/A	#N/A	#N/A
CG15177	FBgn0037461	1.05794	1.8539	-1.30884	-0.507062	-2.96599	-1.73653	#N/A	#N/A	#N/A	#N/A	#N/A	#N/A
CG14739	FBgn0037987	1.27842	1.75197	-2.30832	-0.430031	-2.97119	-1.70061	#N/A	#N/A	#N/A	#N/A	#N/A	#N/A
CG14540	FBgn0039398	1.08605	1.9272	-2.32716	-0.279115	-2.97529	-1.6272	#N/A	#N/A	#N/A	#N/A	#N/A	#N/A
CG4375	FBgn0031295	1.49229	2.27414	-2.14866	-0.0681264	-2.97623	-1.52218	#N/A	#N/A	#N/A	#N/A	#N/A	#N/A
CG5024	FBgn0039373	1.13155	1.76472	-0.652627	-0.550974	-2.9842	-1.76759	#N/A	#N/A	#N/A	#N/A	#N/A	#N/A
CG5017	FBgn0039553	1.4513	2.37982	-1.28292	-0.46119	-2.98537	-1.72328	#N/A	#N/A	#N/A	#N/A	#N/A	#N/A
CG34161	FBgn0085190	1.20721	1.80758	-1.61031	-0.450273	-2.98813	-1.7192	#N/A	#N/A	#N/A	#N/A	#N/A	#N/A
CG8564	FBgn0035776	1.12223	1.96304	-1.89079	-0.187096	-2.9885	-1.5878	#N/A	#N/A	#N/A	#N/A	#N/A	#N/A
sinah	FBgn0259794	1.10414	1.90882	-1.97431	-0.261659	-2.99063	-1.62615	#N/A	#N/A	#N/A	#N/A	#N/A	#N/A
CG4669	FBgn0035598	1.27795	2.13908	-2.11639	-0.161067	-3.00433	-1.5827	#N/A	#N/A	#N/A	#N/A	#N/A	#N/A
CG8565	FBgn0030697	1.07503	2.02641	-0.940329	-0.209116	-3.016	-1.61256	#N/A	#N/A	#N/A	#N/A	#N/A	#N/A
CG13477	FBgn0036438	1.0259	1.85291	-2.00735	-0.230087	-3.0282	-1.62914	#N/A	#N/A	#N/A	#N/A	#N/A	#N/A
CG3494	FBgn0035008	1.03925	1.9461	-1.36638	-0.32376	-3.03525	-1.6795	#N/A	#N/A	#N/A	#N/A	#N/A	#N/A
CG7755	FBgn0034105	1.02718	1.53127	-2.7335	-0.127181	-3.04075	-1.58397	#N/A	#N/A	#N/A	#N/A	#N/A	#N/A
CG7251	FBgn0031723	1.08136	1.86918	-2.65448	-0.158333	-3.04128	-1.59981	#N/A	#N/A	#N/A	#N/A	#N/A	#N/A
CG33308	FBgn0250834	1.12196	1.42795	-1.99149	-0.487048	-3.04841	-1.76773	#N/A	#N/A	#N/A	#N/A	#N/A	#N/A
CG3517	FBgn0038706	1.19732	2.08481	-2.83063	-0.222575	-3.05022	-1.6364	#N/A	#N/A	#N/A	#N/A	#N/A	#N/A
CG2267	FBgn0039792	1.3326	2.3526	-2.08561	-0.25718	-3.06376	-1.66047	#N/A	#N/A	#N/A	#N/A	#N/A	#N/A
CG10317	FBgn0038423	1.05726	1.72521	-1.78055	-0.478174	-3.0825	-1.78034	#N/A	#N/A	#N/A	#N/A	#N/A	#N/A
CG5790	FBgn0032677	1.13491	1.93583	-2.2155	-0.412949	-3.092	-1.75247	#N/A	#N/A	#N/A	#N/A	#N/A	#N/A
spaw	FBgn0050365	1.16751	2.14412	-2.32224	-0.11499	-3.09954	-1.60726	#N/A	#N/A	#N/A	#N/A	#N/A	#N/A
CG31870	FBgn0051870	1.33646	1.95459	-1.67962	-0.157511	-3.10523	-1.63137	#N/A	#N/A	#N/A	#N/A	#N/A	#N/A
CG9254	FBgn0028513	1.05125	2.01932	-2.09099	-0.225066	-3.10919	-1.66713	#N/A	#N/A	#N/A	#N/A	#N/A	#N/A
CG6304	FBgn0032624	1.40182	2.14652	-1.41753	-0.504062	-3.12609	-1.81508	#N/A	#N/A	#N/A	#N/A	#N/A	#N/A
CG13110	FBgn0032111	1.02965	1.61627	-2.61779	-0.712329	-3.15882	-1.93557	#N/A	#N/A	#N/A	#N/A	#N/A	#N/A
CG31802	FBgn0051802	1.10871	2.12297	-1.16336	-0.43324	-3.17129	-1.80227	#N/A	#N/A	#N/A	#N/A	#N/A	#N/A
CG30278	FBgn0050278	1.09759	1.62087	-2.2478	-0.367651	-3.17975	-1.7737	#N/A	#N/A	#N/A	#N/A	#N/A	#N/A
CG9602	FBgn0038175	1.28762	1.80365	-1.75659	-0.203734	-3.19056	-1.69715	#N/A	#N/A	#N/A	#N/A	#N/A	#N/A
CG12307	FBgn0032370	1.06196	1.62292	-2.029	-0.389762	-3.21559	-1.80268	#N/A	#N/A	#N/A	#N/A	#N/A	#N/A
CG17237	FBgn0031410	1.01335	1.91468	-2.47	-0.246918	-3.23598	-1.74145	#N/A	#N/A	#N/A	#N/A	#N/A	#N/A
CG11373	FBgn0040679	1.06785	1.96125	-1.20036	-0.0806821	-3.24211	-1.6614	#N/A	#N/A	#N/A	#N/A	#N/A	#N/A
CG42820	FBgn0262002	1.07567	1.8678	-0.838136	-0.421318	-3.26202	-1.84167	#N/A	#N/A	#N/A	#N/A	#N/A	#N/A
CG6380	FBgn0032632	1.18298	2.02957	-2.51312	-0.41661	-3.27145	-1.84403	#N/A	#N/A	#N/A	#N/A	#N/A	#N/A
CG16894	FBgn0034483	1.20494	1.91914	-2.17456	-0.31182	-3.27522	-1.79352	#N/A	#N/A	#N/A	#N/A	#N/A	#N/A
CG42733	FBgn0261686	1.06288	1.95968	-2.02173	-0.161557	-3.28187	-1.72171	#N/A	#N/A	#N/A	#N/A	#N/A	#N/A
CG30378	FBgn0050378	1.16325	1.87855	-1.20517	-0.357878	-3.30048	-1.82918	#DIV/0!	#DIV/0!	#DIV/0!	#DIV/0!	#DIV/0!	#DIV/0!
CG13747	FBgn0033364	1.11769	1.94152	-1.51712	-0.256957	-3.31022	-1.78359	#N/A	#N/A	#N/A	#N/A	#N/A	#N/A
CG12689	FBgn0029952	1.06843	1.99859	-1.3205	-0.477415	-3.32826	-1.90284	#N/A	#N/A	#N/A	#N/A	#N/A	#N/A
CG6262	FBgn0034121	1.06975	1.83153	-2.49438	-0.120074	-3.35052	-1.7353	#N/A	#N/A	#N/A	#N/A	#N/A	#N/A
CG6527	FBgn0036085	1.00573	1.81855	-1.73947	-0.270125	-3.37903	-1.82458	#N/A	#N/A	#N/A	#N/A	#N/A	#N/A
ran-like	FBgn0036497	1.0824	2.02323	-2.42607	-0.477945	-3.399	-1.93847	#N/A	#N/A	#N/A	#N/A	#N/A	#N/A
CG33136	FBgn0053136	1.10817	1.21972	-1.4274	-0.9902	-3.50074	-2.24547	#N/A	#N/A	#N/A	#N/A	#N/A	#N/A
CG3199	FBgn0038210	1.14752	1.63686	-2.11723	-0.203527	-3.50425	-1.85389	#N/A	#N/A	#N/A	#N/A	#N/A	#N/A
CG4983	FBgn0032371	1.13246	1.98427	-1.89482	-0.223268	-3.51954	-1.87141	#N/A	#N/A	#N/A	#N/A	#N/A	#N/A
CG13476	FBgn0036441	1.1417	1.78046	-1.17069	-0.408733	-3.53065	-1.96969	#N/A	#N/A	#N/A	#N/A	#N/A	#N/A
CG13243	FBgn0028903	1.0089	1.77285	-2.0789	-0.504602	-3.60748	-2.05604	#N/A	#N/A	#N/A	#N/A	#N/A	#N/A
CG11714	FBgn0036170	1.15174	1.78361	-1.84455	-0.147696	-3.62891	-1.8883	#N/A	#N/A	#N/A	#N/A	#N/A	#N/A
CG31141	FBgn0051141	1.03233	1.471	-1.24266	-0.501112	-3.66956	-2.08534	#N/A	#N/A	#N/A	#N/A	#N/A	#N/A
Hsp60D	FBgn0032525	1.227	1.82843	-0.937661	-0.5001	-3.68579	-2.09295	#N/A	#N/A	#N/A	#N/A	#N/A	#N/A
CG32457	FBgn0052457	1.10731	2.10446	-2.64938	-0.680633	-3.68796	-2.18429	#N/A	#N/A	#N/A	#N/A	#N/A	#N/A
CG31245	FBgn0051245	1.04045	1.72679	-1.36085	-0.410411	-3.74311	-2.07676	#N/A	#N/A	#N/A	#N/A	#N/A	#N/A
CG31008	FBgn0051008	1.03457	1.52991	-1.29015	-0.363198	-3.84453	-2.10387	#N/A	#N/A	#N/A	#N/A	#N/A	#N/A
CG5693	FBgn0040989	1.38154	1.66301	-1.77386	-0.663304	-4.02196	-2.34263	#N/A	#N/A	#N/A	#N/A	#N/A	#N/A
CG14974	FBgn0040694	1.07368	1.3909	-1.202	-0.28451	-4.13951	-2.21201	#N/A	#N/A	#N/A	#N/A	#N/A	#N/A
CG5224	FBgn0034354	1.40248	0.32284	0.00582862	0.0200914	0.0396329	0.0298621	0.938452	0.0779772	0.124174	0.273918	0.11467	0.194294
exu	FBgn0000615	0.96335	1.77313	-0.325126	-0.127522	-0.977542	-0.552532	0.938212	0.0663215	#DIV/0!	#DIV/0!	#DIV/0!	#DIV/0!
Lectin-galC1	FBgn0016675	2.12042	0.487814	-0.175585	-0.159109	0.0609794	-0.049065	0.930272	0.370052	0.774807	0.195171	0.366859	0.281015
Tektin-A	FBgn0028902	0.523229	1.48619	-2.47678	-0.260033	-3.8421	-2.05107	0.827752	0.958047	#DIV/0!	#DIV/0!	#DIV/0!	#DIV/0!
CG13177	FBgn0040759	1.00983	0.25397	-0.406878	-0.363056	-0.450954	-0.407005	0.824366	0.0101197	0.138774	0.111732	0.28106	0.196396
CG14508	FBgn0039651	0.692712	1.2909	-0.263495	-0.262799	-1.25074	-0.756768	0.816736	0.931217	#DIV/0!	#DIV/0!	#DIV/0!	#DIV/0!
CG16884	FBgn0028544	1.34546	0.789277	-1.34957	-1.49013	-1.00819	-1.24916	0.696818	0.887929	-0.176145	-0.0660453	-0.207064	-0.136554
CG10869	FBgn0031347	0.880478	1.85819	-0.811858	-0.258839	-2.39897	-1.3289	0.690125	0.849944	#DIV/0!	#DIV/0!	#DIV/0!	#DIV/0!
CG5724	FBgn0038082	0.968688	1.23855	-1.73241	-0.294125	-0.487494	-0.390809	0.655925	0.578718	0.590289	-0.182325	-0.277684	-0.230004
CG14609	FBgn0037483	0.690639	1.38141	-0.7642	-0.460409	-2.44336	-1.45188	0.655117	0.985461	#DIV/0!	#DIV/0!	#DIV/0!	#DIV/0!
Obp99a	FBgn0039678	0.856437	1.52815	-0.464845	0.204246	0.198841	0.201544	0.640555	0.616989	-0.0979314	-0.402295	-0.261767	-0.332031
Dbi	FBgn0010387	1.01097	0.437133	-0.0667003	-0.0199764	0.0607202	0.0203719	0.628201	0.709363	-0.490695	-0.00258571	0.415605	0.20651
Cpr60D	FBgn0050163	1.03263	0.69964	-0.210347	-0.179668	0.0307367	-0.0744656	0.582463	0.722041	#DIV/0!	#DIV/0!	#DIV/0!	#DIV/0!
Pof	FBgn0035047	0.657438	1.37352	-0.0643709	-0.09365	-0.579242	-0.336446	0.564253	0.558542	#DIV/0!	#DIV/0!	#DIV/0!	#DIV/0!
CG9427	FBgn0037721	0.189595	1.06105	0.272792	0.261399	-0.412065	-0.0753329	0.562588	0.74054	#DIV/0!	#DIV/0!	#DIV/0!	#DIV/0!
Pdh	FBgn0011693	0.852867	1.12672	-0.451266	-0.937895	-0.450102	-0.693999	0.5584	0.557637	-0.0826145	-0.152947	0.282184	0.0646184
CG6140	FBgn0036162	0.87306	1.85081	-1.58505	0.0556416	-1.93446	-0.939408	0.550389	0.304711	-0.0379559	-0.445428	-0.234008	-0.339718
CG3085	FBgn0034816	0.834147	1.7734	-0.779114	-0.125299	-1.2936	-0.709449	0.550177	0.657576	#DIV/0!	#DIV/0!	#DIV/0!	#DIV/0!
Obp56a	FBgn0034468	1.14144	-0.133457	0.261915	0.121629	0.130337	0.125983	0.534026	-0.80663	0.69286	0.369432	0.533776	0.451604
CG14740	FBgn0037988	0.939729	1.87445	-1.77955	-0.218775	-2.83501	-1.52689	0.522291	0.572746	#DIV/0!	#DIV/0!	#DIV/0!	#DIV/0!
CG7264	FBgn0036214	0.554966	1.23077	-0.435294	-0.579733	-2.69357	-1.63665	0.464156	0.6735	#DIV/0!	#DIV/0!	#DIV/0!	#DIV/0!
CG3640	FBgn0035042	0.133711	3.45834	-0.521216	1.21627	-0.555008	0.330631	0.452625	0.893815	#DIV/0!	#DIV/0!	#DIV/0!	#DIV/0!
Cyp6g1	FBgn0025454	0.656479	1.90241	-0.0567699	0.146658	0.155203	0.150931	0.441277	0.721843	-0.394842	0.206021	-0.0668713	0.0695748
Acp53C14c	FBgn0053530	0.00922526	2.19508	-0.916684	0.395963	-1.35662	-0.480329	0.440437	0.890335	0.529567	0.0702269	-0.116605	-0.023189
CG1146	FBgn0035346	0.552569	1.2496	0.0813957	-0.123708	-0.0966478	-0.110178	0.435895	0.414683	#DIV/0!	#DIV/0!	#DIV/0!	#DIV/0!
CG31874	FBgn0051874	0.572591	1.25875	0.36528	-0.310949	-1.68982	-1.00038	0.432962	0.059821	-0.0416715	-0.306992	0.0441966	-0.131398
CG17575	FBgn0250842	0.127835	3.71827	-1.16794	1.47637	-0.226048	0.625162	0.405218	0.805751	#DIV/0!	#DIV/0!	#DIV/0!	#DIV/0!
CG7214	FBgn0031940	1.01298	-0.0553757	-1.59101	-1.169	-1.03115	-1.10007	0.404184	0.559867	0.491185	0.741429	0.420362	0.580896
CG4706	FBgn0037862	0.667261	1.62456	-2.51915	-0.326113	-3.74053	-2.03332	0.404	0.342464	-0.0845352	-0.0352033	0.151808	0.0583022
sgl	FBgn0261445	1.3108	0.633026	0.0214392	0.0252213	0.0672919	0.0462566	0.39566	0.0330217	-0.262721	0.345316	0.350224	0.34777
Cpr47Ea	FBgn0033597	0.426956	1.42661	-1.03147	-1.30998	-1.55188	-1.43093	0.388568	0.330587	0.589205	0.368639	0.237644	0.303141
Cpr66D	FBgn0052029	1.23855	0.513005	0.754701	0.102673	0.306162	0.204418	0.380346	0.482985	1.00246	0.246321	0.202602	0.224462
CG14607	FBgn0037488	0.656275	1.42688	-0.809192	-0.203007	-0.238924	-0.220965	0.359025	0.621822	0.110654	0.641353	0.181799	0.411576
Ppm1	FBgn0035143	0.697897	1.64506	0.960208	-0.086496	-1.98827	-1.03738	0.35347	0.333096	#DIV/0!	#DIV/0!	#DIV/0!	#DIV/0!
CG11608	FBgn0038069	0.00755657	1.93045	-1.38814	1.42907	-0.955611	0.236728	0.335359	0.958701	0.50933	0.154751	-0.15083	0.00196039
Ant2	FBgn0025111	0.614204	1.25056	0.0926018	-0.164937	-0.859238	-0.512088	0.330779	0.104851	0.00684157	-0.435368	-0.377091	-0.40623
CG7366	FBgn0035855	0.786753	1.36661	-0.358729	-0.556024	-2.10952	-1.33277	0.328093	-0.369763	0.304899	0.297151	1.00673	0.651942
CG13759	FBgn0040376	0.26538	1.80951	-0.119414	0.212146	-0.616721	-0.202288	0.319549	0.514915	#DIV/0!	#DIV/0!	#DIV/0!	#DIV/0!
CG34324	FBgn0085353	1.66084	0.705368	0.0329496	0.0425636	0.125117	0.0838401	0.316754	0.613984	-0.367219	0.584668	-0.0856791	0.249494
CG10298	FBgn0037432	0.808364	1.47151	-0.0461191	-0.312367	-1.6031	-0.957732	0.309922	0.441036	#DIV/0!	#DIV/0!	#DIV/0!	#DIV/0!
Akh	FBgn0004552	2.63922	0.948071	0.791191	-0.164152	0.701132	0.26849	0.303448	0.0800725	#DIV/0!	#DIV/0!	#DIV/0!	#DIV/0!
CG34129	FBgn0083965	0.172877	2.9304	-0.113262	1.47327	-0.856007	0.308632	0.301204	0.980207	#DIV/0!	-1.24109	-1.34094	-1.29101
CG5265	FBgn0038486	0.527197	1.31426	-3.28223	-0.210452	-4.04687	-2.12866	0.292608	0.00434487	#DIV/0!	#DIV/0!	#DIV/0!	#DIV/0!
CG1208	FBgn0037386	0.794021	1.00259	-0.214365	-0.0762308	-0.140089	-0.10816	0.254528	0.228223	-0.499268	-0.076175	-0.379075	-0.227625
CG5718	FBgn0036222	0.387419	1.12817	-3.1043	-0.406611	-3.70793	-2.05727	0.253121	-0.0218401	#DIV/0!	#DIV/0!	#DIV/0!	#DIV/0!
CG7349	FBgn0030975	0.0334969	1.20497	0.665322	-0.0645113	-0.854058	-0.459285	0.243921	0.194321	-0.271609	-0.0314995	0.157029	0.0627647
CG17856	FBgn0039576	0.431048	1.45106	-1.3778	-0.0858052	-2.81707	-1.45144	0.231849	0.0744299	-0.152057	-0.0983255	0.0937237	-0.00230091
CG5569	FBgn0034919	0.545227	1.05374	-0.0965632	0.0204062	-0.00676697	0.00681961	0.22742	0.296073	-0.463677	-0.196652	0.0925822	-0.052035
Ser6	FBgn0011834	0.699202	1.35241	-0.457816	0.14134	-0.104418	0.0184613	0.205457	0.0434874	-1.45781	0.746136	0.992436	0.869286
CG11913	FBgn0039331	0.546254	1.20429	0.640919	-0.340727	-1.55963	-0.950176	0.199903	0.0942076	-0.331697	-0.16943	-0.169802	-0.169616
Cyp12a5	FBgn0038680	0.688229	1.82386	-0.169721	-0.176195	-0.0152827	-0.0957389	0.184872	0.868972	0.373633	0.0541507	-0.0666935	-0.00627142
blanks	FBgn0035608	0.976253	1.35331	1.74381	0.0810665	-0.483093	-0.201013	0.167653	0.208783	#DIV/0!	#DIV/0!	#DIV/0!	#DIV/0!
CG6168	FBgn0036154	-0.201923	2.62539	-0.322251	1.6893	-0.577157	0.556071	0.161406	0.791995	#DIV/0!	#DIV/0!	#DIV/0!	#DIV/0!
CG42684	FBgn0261570	0.0489211	1.18595	-0.00268835	-0.0292914	-0.0318033	-0.0305474	0.157677	0.248225	#DIV/0!	#DIV/0!	#DIV/0!	#DIV/0!
CG3788	FBgn0034800	0.760655	1.32074	-0.248198	-0.246781	-1.75498	-1.00088	0.149861	-0.0895765	-0.155976	0.124459	0.487491	0.305975
CG5144	FBgn0035957	0.97956	1.54763	0.690803	0.0501372	0.12122	0.0856785	0.143938	0.484021	0.1251	-0.0603013	0.0396413	-0.01033
CG32985	FBgn0052985	-0.523041	1.35877	-0.0664721	1.35258	-0.483109	0.434736	0.131052	0.85346	1.16876	0.258184	0.499472	0.378828
CG3927	FBgn0034739	0.539934	1.35592	0.515663	-0.92738	-2.27063	-1.599	0.118383	-0.0132749	#DIV/0!	#DIV/0!	#DIV/0!	#DIV/0!
CG4021	FBgn0034659	0.570421	1.25102	-0.638635	-0.628432	-2.80469	-1.71656	0.118383	-0.0132749	-0.382622	0.0538632	0.28303	0.168447
Sfp65A	FBgn0259969	-0.0377024	3.5836	-1.32519	0.880436	-0.770463	0.0549867	0.0933051	0.523277	0.369273	0.349258	0.698347	0.523803
lox2	FBgn0034660	1.10086	0.770899	-1.04314	-0.66399	-0.543793	-0.603892	0.0929997	0.171092	#DIV/0!	#DIV/0!	#DIV/0!	#DIV/0!
skpB	FBgn0026176	0.645346	1.03961	-0.512308	-0.209917	-0.388459	-0.299188	0.0869018	0.100373	0.0577917	0.172898	0.24007	0.206484
Acp26Ab	FBgn0002856	-0.346456	3.88432	-0.146896	1.82259	-0.145619	0.838487	0.0857506	0.862572	1.23989	1.11236	0.91724	1.0148
ttm3	FBgn0032971	0.599428	1.45957	-1.18203	-0.190327	-3.84209	-2.01621	0.0606096	-0.47363	#DIV/0!	#DIV/0!	#DIV/0!	#DIV/0!
Cdlc2	FBgn0026141	0.976056	1.97909	-2.87766	-0.303423	-3.04934	-1.67638	0.0599511	0.0510014	0.117452	-0.0624446	-0.038197	-0.0503208
CG3964	FBgn0031574	0.814054	1.82135	0.460711	-0.359496	-1.94296	-1.15123	0.048077	0.0683643	#DIV/0!	#DIV/0!	#DIV/0!	#DIV/0!
CG10587	FBgn0037039	0.0359699	1.76873	-0.321909	0.881539	-1.07327	-0.0958634	0.0425569	0.889649	#DIV/0!	#DIV/0!	#DIV/0!	#DIV/0!
gskt	FBgn0046332	0.708203	1.51752	-1.70748	-0.449016	-2.89136	-1.67019	0.026423	0.0577552	-0.0110092	0.0376106	-0.0143825	0.011614
GstE7	FBgn0063493	0.923875	1.13738	-0.0429228	0.0623765	0.110877	0.0866266	0.016555	0.0601773	0.273255	0.509872	0.993275	0.751574
CG11878	FBgn0039310	1.51417	0.516285	-0.190973	0.0658754	0.161165	0.11352	-0.016521	-0.28122	-1.07561	0.477969	0.399158	0.438563
CG32026	FBgn0052026	0.894024	1.69987	-0.967559	-0.344154	-3.3109	-1.82753	-0.030599	0.0122225	-0.128615	-0.118699	-0.0117785	-0.0652387
CG8851	FBgn0031546	0.287708	1.31105	-0.365789	0.163524	-2.6705	-1.25349	-0.0369417	-0.325633	#DIV/0!	#DIV/0!	#DIV/0!	#DIV/0!
Pp1-13C	FBgn0003132	0.423486	1.10234	-0.534836	-0.159718	-3.23413	-1.69692	-0.054517	-0.141584	-0.0382925	-0.0964242	-0.0159842	-0.0562042
CG5322	FBgn0032253	-0.103725	1.11707	-0.132578	0.0544291	0.0172654	0.0358473	-0.0555727	-0.123411	#DIV/0!	#DIV/0!	#DIV/0!	#DIV/0!
Arp53D	FBgn0011743	0.658893	1.71527	-0.0512356	-0.260133	-2.74583	-1.50298	-0.0596206	-0.158799	#DIV/0!	#DIV/0!	#DIV/0!	#DIV/0!
CG2528	FBgn0032969	0.761342	1.50181	-2.57209	-0.43344	-3.34725	-1.89035	-0.0686046	-0.0833672	#DIV/0!	#DIV/0!	#DIV/0!	#DIV/0!
Hsc70-2	FBgn0001217	0.835113	1.4192	-0.421083	-0.24816	-1.16549	-0.706827	-0.0693616	-0.0359294	0.588274	0.0853209	-0.0621226	0.0115992
SIP2	FBgn0061197	0.811432	1.8468	-0.548561	-0.142888	-1.97244	-1.05766	-0.0728058	-0.142361	#DIV/0!	#DIV/0!	#DIV/0!	#DIV/0!
Atg1	FBgn0260945	-0.195555	1.18306	0.023608	0.0396305	0.000718128	0.0201743	-0.0856354	0.0364459	#DIV/0!	#DIV/0!	#DIV/0!	#DIV/0!
CG11112	FBgn0033164	-0.406909	2.13754	-0.767936	1.65098	-1.13757	0.256704	-0.10475	-0.0371812	-0.132342	-0.00336503	-0.0443052	-0.0238351
fln	FBgn0005633	0.652905	1.34016	-0.580776	-0.236822	-0.377879	-0.307351	-0.10535	-0.245973	-0.161169	-0.183219	-0.0210832	-0.102151
CG11700	FBgn0029856	-0.382532	1.55953	0.798131	-0.0218209	0.104706	0.0414424	-0.123784	-0.165869	0.0477743	-0.0316464	0.0299091	-0.000868639
CG32548	FBgn0052548	0.773032	1.58595	-0.703988	-0.208594	-1.21812	-0.713359	-0.133022	0.00655381	#DIV/0!	#DIV/0!	#DIV/0!	#DIV/0!
CG15199	FBgn0030270	1.25138	0.814384	-0.335526	-0.0557018	0.0309185	-0.0123916	-0.134677	-0.181313	#DIV/0!	#DIV/0!	#DIV/0!	#DIV/0!
CG14168	FBgn0036044	0.88624	2.12529	-0.49152	-1.66855	-2.12658	-1.89756	-0.135566	-0.227227	-0.0771891	-0.142118	-0.00678238	-0.0744504
CG4701	FBgn0028868	0.635357	1.43446	-1.51546	-0.24845	-3.82901	-2.03873	-0.178935	-0.173478	#DIV/0!	#DIV/0!	#DIV/0!	#DIV/0!
CG5103	FBgn0036784	0.632916	1.36943	-2.29078	-0.165872	-3.97837	-2.07212	-0.215449	-0.050991	-0.672627	0.0123076	0.163257	0.0877825
CG9664	FBgn0031515	1.3198	0.815178	0.0205292	-0.0993892	0.0233105	-0.0380394	-0.460194	-0.50913	0.136442	0.019664	0.159543	0.0896032
CG13155	FBgn0033723	1.26742	-0.369981	-0.430406	-1.18629	0.321621	-0.432334	-0.667207	-0.532769	#DIV/0!	#DIV/0!	#DIV/0!	#DIV/0!
CG6432	FBgn0039184	1.17701	-0.117095	-0.0990816	-0.268578	0.0739188	-0.0973294	-0.817647	-0.892199	#DIV/0!	#DIV/0!	#DIV/0!	#DIV/0!
CG17242	FBgn0250841	-0.229356	1.07099	-1.78436	1.62787	-3.08787	-0.729997	1.44475	-0.828643	-0.560132	-0.620987	1.80235	0.59068
CG31075	FBgn0051075	1.11807	0.605767	-0.209339	-0.0308783	0.130089	0.0496053	1.22817	0.867249	0.0894379	0.163059	0.31989	0.241474
CG42821	FBgn0262003	1.19908	0.0143399	0.355795	0.0127226	0.11388	0.0633015	1.11455	0.115463	0.48128	0.615303	-0.162854	0.226224
CG31205	FBgn0051205	0.932256	1.39617	0.0208264	-0.0439148	-0.0943878	-0.0691513	1.11297	0.775636	#DIV/0!	#DIV/0!	#DIV/0!	#DIV/0!
CG31104	FBgn0051104	1.61544	0.755003	-0.883837	-0.0779024	0.077742	-8.01926e-05	1.03091	0.756787	-1.48638	0.190565	0.397939	0.294252
CG9360	FBgn0030332	1.10654	0.814737	-0.12731	-0.0720119	-0.035396	-0.0537039	1.02492	0.702623	0.0671097	0.0246276	-0.23165	-0.103511
CG16885	FBgn0032538	1.04915	0.784481	-0.72043	-0.600653	-0.528363	-0.564508	0.963879	1.17123	-0.0232683	-0.205368	-0.422093	-0.31373
Cyp4e3	FBgn0015035	0.535755	1.37356	0.315953	0.183206	0.386108	0.284657	0.958101	1.09194	#DIV/0!	#DIV/0!	#DIV/0!	#DIV/0!
Hex-t2	FBgn0042710	0.80837	1.65353	-1.68606	-0.163375	-2.56497	-1.36417	0.951635	1.32108	#DIV/0!	#DIV/0!	#DIV/0!	#DIV/0!
Obp22a	FBgn0043539	0.0909184	3.2893	-0.559424	0.787947	-0.78511	0.00141846	0.894361	1.74898	-0.235197	-0.427194	-0.541396	-0.484295
CG43056	FBgn0262358	0.0847288	2.23441	0.106464	1.12282	-0.552234	0.285293	0.888663	2.16726	#DIV/0!	#DIV/0!	#DIV/0!	#DIV/0!
CG5840	FBgn0038516	0.964237	1.06632	-0.0469486	0.0697525	0.130143	0.099948	0.88833	1.01669	0.242842	0.503408	0.543311	0.523359
lectin-46Cb	FBgn0040092	0.303145	1.26564	-0.0720194	0.136932	-0.213538	-0.038303	0.847678	1.81966	0.751548	0.130129	0.239007	0.184568
Gal	FBgn0001089	0.881593	1.01455	-0.847823	0.0737103	0.102367	0.0880385	0.842989	1.0059	-0.0760744	0.239423	-0.219487	0.00996835
CG30395	FBgn0050395	-0.0347433	3.22371	-1.24608	0.866285	-0.83276	0.0167628	0.834215	1.94127	0.895687	-0.126971	-0.218991	-0.172981
Acp26Aa	FBgn0002855	-0.054372	4.3029	-1.24087	0.839528	-0.885492	-0.0229821	0.826298	1.28858	0.676644	0.198461	-0.00839347	0.0950336
Sfp35C	FBgn0259965	-0.0194477	3.40459	-1.41523	0.9712	-0.774219	0.0984901	0.784236	1.80318	0.521353	0.414292	0.11419	0.264241
CG31419	FBgn0051419	0.298623	2.67863	-0.730069	0.885505	-0.904569	-0.00953205	0.768769	1.6006	0.795715	0.214974	0.226463	0.220719
lectin-46Ca	FBgn0040093	0.028571	1.68007	-0.159882	0.308507	-0.216386	0.0460604	0.767522	1.85946	0.756037	0.287299	0.0468035	0.167051
CG14034	FBgn0250847	-0.182638	3.25143	-0.831803	0.687764	-0.822258	-0.067247	0.762417	1.69821	0.782738	0.501255	0.506041	0.503648
CG31418	FBgn0051418	0.196407	3.21644	-0.470912	0.835893	-1.00265	-0.0833803	0.747082	1.79152	0.650065	0.35293	0.111352	0.232141
CG42564	FBgn0260766	0.118947	2.68546	0.101813	0.804938	-0.71684	0.0440492	0.729781	1.85045	1.31363	0.803614	0.606067	0.70484
CG9029	FBgn0031746	0.350025	4.33501	-0.927684	1.03599	-0.119574	0.458207	0.729013	1.65004	0.510509	0.47478	0.209975	0.342378
Mst57Dc	FBgn0011670	-0.15307	4.57029	-0.723115	1.0372	-0.759319	0.138942	0.724964	1.96365	0.482612	0.0138842	-0.342688	-0.164402
CG3301	FBgn0038878	0.629584	1.26274	-0.192381	-0.0530603	-0.0223858	-0.037723	0.699066	1.48657	-0.129905	0.0513022	0.316772	0.184037
Sfp53D	FBgn0259967	0.717897	2.36896	-0.721115	-0.146507	-0.656825	-0.401666	0.687455	1.46473	1.12156	0.556185	0.604916	0.58055
Acp36DE	FBgn0011559	-0.31158	4.14703	-1.15534	1.00492	-0.784057	0.110431	0.668466	1.40046	0.643486	0.187301	0.122618	0.154959
CG17843	FBgn0038919	0.899422	1.70605	-0.100243	-0.0346632	-0.203668	-0.119166	0.639484	1.63782	0.596654	0.603746	0.47382	0.538783
CG15635	FBgn0031617	-0.0319084	3.06791	-1.23277	1.44899	-1.01282	0.218086	0.626315	1.6185	0.517158	0.541182	0.286365	0.413774
Acp76A	FBgn0015586	0.070658	3.72224	-1.12072	0.871009	-1.05622	-0.092604	0.626198	1.37376	0.49087	0.248199	0.470234	0.359216
Sfp33A2	FBgn0259963	0.0644108	2.12802	-0.177414	0.703841	-0.996171	-0.146165	0.607437	1.21266	#DIV/0!	#DIV/0!	#DIV/0!	#DIV/0!
CG9997	FBgn0039597	0.0620374	2.88767	0.0225188	1.31362	-0.716328	0.298645	0.595046	1.67911	1.19774	0.534394	0.493302	0.513848
Sfp78E	FBgn0261059	0.163522	2.88572	-0.381433	0.900858	-0.800514	0.0501723	0.593334	1.63862	1.17385	0.787586	0.675754	0.73167
CG34002	FBgn0054002	-0.0119798	2.97044	0.778649	1.50896	-0.422087	0.543438	0.589833	1.45008	0.372036	-0.0614451	-0.94039	-0.500918
CG34033	FBgn0054033	-0.0181917	3.09539	-0.504406	1.44693	-0.746868	0.350032	0.579504	1.96619	0.612202	-0.0127357	-0.564892	-0.288814
Acp53C14b	FBgn0034153	-0.346291	4.67691	-0.86485	1.09905	-0.451592	0.323727	0.57376	1.53432	0.951307	0.392301	0.563124	0.477713
CG32833	FBgn0052833	0.0218084	1.88778	-0.613559	1.67133	-0.98907	0.341129	0.558123	1.72917	1.27054	0.524641	0.0172014	0.270921
CG43145	FBgn0262621	-0.281892	2.15985	-0.154097	-0.183001	-1.13813	-0.660566	0.552629	1.25963	#DIV/0!	#DIV/0!	#DIV/0!	#DIV/0!
CG31872	FBgn0051872	-0.42925	4.22953	-1.48845	1.03689	-0.783675	0.126606	0.543214	1.44796	0.984634	0.315406	0.374357	0.344882
Spn7	FBgn0083141	0.233942	2.13436	-1.91865	0.479174	-0.94343	-0.232128	0.542589	1.37866	#DIV/0!	#DIV/0!	#DIV/0!	#DIV/0!
Sfp51E	FBgn0259966	-0.0813203	3.3284	-1.23307	1.00182	-0.643881	0.178969	0.53892	1.55015	0.670686	0.678852	0.37627	0.527561
CG18284	FBgn0043825	0.133806	4.08288	-1.1778	0.63489	-0.844548	-0.104829	0.531866	1.29875	0.818273	0.146683	0.286184	0.216433
Sems	FBgn0037036	0.0632315	2.48305	-0.682496	1.38839	-0.580941	0.403724	0.526792	1.35565	0.277821	0.298381	0.333552	0.315967
CG6690	FBgn0038918	-0.16674	2.40536	-0.743719	1.85146	-0.823798	0.513831	0.521998	1.26781	1.04166	0.313493	0.361511	0.337502
CG31883	FBgn0032122	-0.0793118	3.85408	-0.915772	0.948961	-0.85342	0.0477709	0.509334	1.88386	0.624267	0.372249	-0.123825	0.124212
Acp70A	FBgn0003034	-0.808852	4.58121	-0.997888	1.14224	-0.54458	0.298829	0.504441	1.78032	0.936847	0.546759	0.242058	0.394408
CG34051	FBgn0054051	-0.178445	3.36455	0.186345	1.29327	-0.432908	0.430182	0.50301	1.47707	1.12825	0.670827	0.763522	0.717174
Sfp24F	FBgn0259958	0.217954	3.7905	-1.01454	0.772344	-0.726391	0.0229763	0.502167	2.35961	0.476663	0.255543	-0.307225	-0.0258414
Acp53C14a	FBgn0034152	-0.790702	4.48612	-1.10108	1.19266	-0.43642	0.378121	0.496965	1.51665	0.410779	0.320459	0.360693	0.340576
lectin-29Ca	FBgn0040098	0.233531	3.87058	-0.299109	0.996959	-0.87277	0.0620947	0.463553	1.34859	0.930084	0.465252	0.610083	0.537667
Acp53Ea	FBgn0015584	-0.371623	4.82722	-0.619629	1.16216	-0.505397	0.328379	0.452453	1.40485	0.927568	0.368307	0.761837	0.565072
CG11037	FBgn0037038	-0.112592	3.62572	-1.09236	0.968196	-0.764303	0.101947	0.442884	1.48659	0.587761	0.326077	-0.0592119	0.133432
CG34130	FBgn0083966	-0.0312421	2.15943	-0.461564	1.17167	-0.954667	0.108501	0.428592	1.04754	0.878433	0.599869	0.659054	0.629461
CG14061	FBgn0039598	-0.0144602	3.36473	-0.740925	1.14319	-0.832068	0.155559	0.420521	1.428	0.618931	0.0288683	-0.136194	-0.0536626
Sfp26Ad	FBgn0261055	-0.375948	4.1039	-0.746067	1.27841	-0.489291	0.394558	0.417484	1.4619	0.902127	0.576022	0.671616	0.623819
CG6071	FBgn0036186	-0.347085	1.44108	1.08961	1.14415	-0.483866	0.330143	0.413416	1.19792	0.636026	0.384114	0.407053	0.395583
CG1701	FBgn0033167	-0.25658	2.01122	-1.69589	1.39809	-0.845678	0.276208	0.386585	1.24164	0.471841	0.38554	0.505714	0.445627
Sfp26Ac	FBgn0259959	0.294078	2.09032	-0.784135	0.283491	-0.930152	-0.323331	0.383238	1.57001	#DIV/0!	#DIV/0!	#DIV/0!	#DIV/0!
CG10029	FBgn0037498	0.00191643	2.00939	-0.0100522	1.82547	-0.7603	0.532586	0.378828	1.33098	#DIV/0!	#DIV/0!	#DIV/0!	#DIV/0!
CG31659	FBgn0051659	-0.169835	2.92612	0.149824	1.37523	-0.449105	0.463061	0.375093	1.32088	1.34068	0.848388	0.70637	0.777379
lectin-30A	FBgn0040097	-0.189812	3.65316	-1.06917	1.01361	-0.590248	0.211679	0.36502	1.30196	0.687143	0.685224	0.929933	0.807579
CG31680	FBgn0051680	-0.101016	3.31305	-0.274567	1.36755	-0.697533	0.335006	0.354772	1.46125	1.12914	0.738195	0.847556	0.792875
Sfp77F	FBgn0259972	-0.111537	3.54979	-0.807243	1.08445	-0.69356	0.195446	0.326524	1.09133	1.36475	1.01963	1.11948	1.06955
Mst57Da	FBgn0011668	-0.857497	5.01907	-0.889693	1.03521	-0.509467	0.262873	0.28183	1.71248	1.10538	0.75173	0.52851	0.64012
Acp62F	FBgn0020509	-0.384231	3.87426	-0.83757	0.74251	-0.730306	0.00610202	0.265551	1.29044	0.681717	0.270921	0.277012	0.273967
CG30488	FBgn0050488	-0.132506	2.56868	-0.638813	1.16524	-0.853064	0.156086	0.260703	1.01298	#DIV/0!	#DIV/0!	#DIV/0!	#DIV/0!
Obp56f	FBgn0043533	-0.22221	3.00397	-0.285483	1.66288	-0.405424	0.628728	0.224359	1.3011	1.27288	0.632218	0.776433	0.704325
Acp29AB	FBgn0015583	0.148346	3.13419	-0.430733	1.19442	-0.807849	0.193286	0.220395	1.61684	0.834864	0.291349	0.322941	0.307145
Sfp70A4	FBgn0259970	-0.173598	3.42555	-0.587167	0.65555	-1.07309	-0.208769	0.181795	1.20965	0.446142	0.257465	0.443254	0.35036
BG642163	FBgn0083938	-0.292637	3.67832	-1.44464	1.039	-0.810683	0.114157	0.167275	1.26272	0.613186	0.400133	0.457031	0.428582
Sfp33A3	FBgn0259964	-0.221628	3.48053	0.446575	0.795812	-0.448914	0.173449	0.166324	1.36358	0.906518	0.607144	0.670217	0.638681
Spn2	FBgn0028987	-0.442441	3.56088	-1.16591	0.0893904	-0.993474	-0.452042	0.0720071	1.47548	0.522848	-0.239449	0.00235075	-0.118549
CG43057	FBgn0262359	0.145748	3.22785	-0.827804	0.467786	-0.928853	-0.230534	0.0400839	1.14995	0.447124	0.557101	0.535591	0.546346
CG17472	FBgn0032868	-0.104437	3.42536	-0.404761	0.936842	-0.63712	0.149861	-0.208923	1.07911	0.606499	0.428358	0.340534	0.384446
Spn3	FBgn0028986	-0.329964	3.86132	-0.735682	0.876722	-0.782961	0.0468803	-0.371686	1.40306	0.743631	0.444459	0.416215	0.430337
CG11598	FBgn0038067	0.605638	3.79972	1.05576	1.26179	-0.857525	0.202133	2.24953	2.78786	#DIV/0!	#DIV/0!	#DIV/0!	#DIV/0!
CG9168	FBgn0035216	0.102882	1.65441	-0.529359	1.75641	-0.534034	0.61119	1.79867	2.59539	-2.30408	-2.13993	-2.4588	-2.29936
CG4377	FBgn0034664	1.09376	0.907848	-0.158653	0.0817483	0.0725356	0.077142	1.50228	1.6208	-0.232047	0.352513	-0.0838749	0.134319
CG15739	FBgn0030347	1.01137	0.512822	-0.101657	0.113852	0.253675	0.183764	1.47904	1.33824	#DIV/0!	#DIV/0!	#DIV/0!	#DIV/0!
sut4	FBgn0028560	0.99967	1.88631	-2.10433	-0.33892	-3.18356	-1.76124	1.29723	1.50127	-0.307778	0.522613	0.0394832	0.281048
CG4594	FBgn0032161	1.09542	0.839783	0.151589	0.102163	0.204171	0.153167	1.27672	1.39195	-0.096841	0.204412	0.301895	0.253154
Tektin-C	FBgn0035638	0.563155	1.34673	-0.196088	-0.0671243	-1.30332	-0.685222	1.27465	1.67806	#DIV/0!	#DIV/0!	#DIV/0!	#DIV/0!
CG10749	FBgn0036328	0.813488	1.57149	-2.49144	-0.325348	-3.61883	-1.97209	1.26726	1.41291	#DIV/0!	#DIV/0!	#DIV/0!	#DIV/0!
Sfp24C1	FBgn0259956	-0.302295	2.44787	-0.631875	0.92148	-0.870129	0.0256756	1.24608	1.50132	#DIV/0!	#DIV/0!	#DIV/0!	#DIV/0!
Erk7	FBgn0052703	0.419758	1.02736	0.149263	-0.314513	-2.61762	-1.46606	1.22671	1.06583	#DIV/0!	#DIV/0!	#DIV/0!	#DIV/0!
CG13833	FBgn0039040	0.938722	1.01025	-0.38138	-0.0765934	-0.060769	-0.0686812	1.18676	1.45331	0.47934	0.863551	0.290382	0.576967
CG10202	FBgn0033969	0.61346	1.28979	-2.27732	-0.291233	-3.82313	-2.05718	1.17603	1.45884	#DIV/0!	#DIV/0!	#DIV/0!	#DIV/0!
CG5432	FBgn0039425	0.680196	1.46812	-0.229597	-0.369183	-3.04124	-1.70521	1.05972	1.45126	-4.51994	-2.34854	-2.64544	-2.49699
Cyp6d5	FBgn0038194	1.05591	0.936026	-0.0562538	0.0110651	0.0321165	0.0215908	1.05939	1.0151	-0.0357008	0.24563	-0.221548	0.0120412
gom	FBgn0029084	0.706779	1.32041	-0.23491	-0.451121	-2.81535	-1.63324	1.04506	1.13465	#DIV/0!	#DIV/0!	#DIV/0!	#DIV/0!
CG6971	FBgn0037962	0.715404	1.41231	-0.469846	-0.42414	-2.02963	-1.22688	1.0381	1.43602	#DIV/0!	#DIV/0!	#DIV/0!	#DIV/0!
Acp63F	FBgn0015585	0.262148	3.92212	-0.0398825	0.652883	-0.535335	0.058774	1.00004	2.79442	-0.27145	-1.13758	-1.74682	-1.4422
Dup99B	FBgn0250832	0.0951677	1.5825	-0.0323042	0.736749	-1.8035	-0.533377	0.833899	-1.51221	-0.535689	-0.982087	2.42063	0.719269
Obp51a	FBgn0043530	-0.323778	1.4164	-1.35266	0.7647	-2.27877	-0.757035	0.790664	-1.09765	-0.111246	-0.701572	2.03029	0.664357
CG43343	FBgn0263048	0.835691	1.71393	0.122145	-0.0565438	-0.741496	-0.39902	-0.404946	-1.40801	0.327639	-0.174638	0.128828	-0.0229047
Cpr49Ab	FBgn0050042	1.80403	-0.338508	-0.426241	-0.727976	0.0304053	-0.348786	-0.661071	-1.10326	-1.27776	-0.282316	-0.386876	-0.334596
CG33346	FBgn0053346	1.37312	-0.442129	-0.0973005	0.00428535	0.249754	0.12702	-0.859393	-1.03061	-0.14394	0.702691	-0.172278	0.265207
CG10064	FBgn0035724	0.846281	1.5269	-0.390919	-0.441241	-2.58826	-1.51475	-1.00084	0.224291	#DIV/0!	#DIV/0!	#DIV/0!	#DIV/0!
Obp57a	FBgn0043535	1.03523	0.470811	-0.0325443	-0.0133537	-0.0228904	-0.018122	1.67244	-1.22626	#DIV/0!	#DIV/0!	#DIV/0!	#DIV/0!
snoRNA:U3:54Ab	FBgn0065047	1.90249	-0.775967	1.67226	-0.377855	1.35526	0.4887	#N/A	#N/A	#N/A	#N/A	#N/A	#N/A
tRNA:CR30229	FBgn0050229	1.49777	-0.886258	0.787167	0.0639491	1.27034	0.667142	#N/A	#N/A	#N/A	#N/A	#N/A	#N/A
CG43799	FBgn0264343	1.54389	0.300069	-0.291579	0.234309	1.18976	0.712033	#N/A	#N/A	#N/A	#N/A	#N/A	#N/A
CG10725	FBgn0036362	3.01872	0.325157	0.63185	-0.0104097	1.08287	0.536231	#N/A	#N/A	#N/A	#N/A	#N/A	#N/A
CG14356	FBgn0038207	1.33957	-0.390798	0.502315	-0.279454	1.02861	0.374575	#N/A	#N/A	#N/A	#N/A	#N/A	#N/A
CG2650	FBgn0000092	1.2717	0.454612	1.23639	0.397901	0.968897	0.683399	#N/A	#N/A	#N/A	#N/A	#N/A	#N/A
Cyp4aa1	FBgn0034053	1.44325	-0.326061	0.202571	-0.227585	0.940565	0.35649	#N/A	#N/A	#N/A	#N/A	#N/A	#N/A
ppk28	FBgn0030795	1.47311	0.0487258	0.955958	-0.262204	0.858853	0.298324	#N/A	#N/A	#N/A	#N/A	#N/A	#N/A
CG15120	FBgn0034454	1.28555	0.52338	-0.228868	0.142009	0.806316	0.474162	#N/A	#N/A	#N/A	#N/A	#N/A	#N/A
CG32557	FBgn0052557	1.17349	-0.826454	0.270482	0.0463774	0.787534	0.416956	#N/A	#N/A	#N/A	#N/A	#N/A	#N/A
CG11029	FBgn0031735	1.13924	-0.373403	0.33084	-0.140943	0.7498	0.304429	#N/A	#N/A	#N/A	#N/A	#N/A	#N/A
snoRNA:CG31191-a	FBgn0263460	1.03987	-0.184352	0.0219795	-0.295661	0.736169	0.220254	#N/A	#N/A	#N/A	#N/A	#N/A	#N/A
CG14075	FBgn0036835	2.11086	0.977055	1.03771	-0.0450567	0.723884	0.339414	#N/A	#N/A	#N/A	#N/A	#N/A	#N/A
CG4576	FBgn0038366	1.05183	0.251249	1.26862	-0.510088	0.691714	0.090813	#N/A	#N/A	#N/A	#N/A	#N/A	#N/A
CR32745	FBgn0052745	1.64137	-0.842644	0.415758	-0.230892	0.683795	0.226451	#N/A	#N/A	#N/A	#N/A	#N/A	#N/A
CG33511	FBgn0053511	1.63824	0.281772	-0.408822	0.0903377	0.633369	0.361853	#N/A	#N/A	#N/A	#N/A	#N/A	#N/A
CG32302	FBgn0052302	1.30719	-0.0199259	1.58379	0.229195	0.619044	0.42412	#N/A	#N/A	#N/A	#N/A	#N/A	#N/A
Cyp6g2	FBgn0033696	1.07969	0.562804	0.674722	-0.527535	0.618063	0.0452642	#N/A	#N/A	#N/A	#N/A	#N/A	#N/A
CG3823	FBgn0029863	1.16415	-0.320019	-0.0408541	-0.670696	0.591589	-0.039553	#N/A	#N/A	#N/A	#N/A	#N/A	#N/A
CG12934	FBgn0033541	-0.114554	1.6231	0.804975	0.448605	0.573315	0.51096	#N/A	#N/A	#N/A	#N/A	#N/A	#N/A
CG11854	FBgn0039299	1.52552	0.627668	1.10359	0.410361	0.528089	0.469225	#N/A	#N/A	#N/A	#N/A	#N/A	#N/A
mre11	FBgn0020270	1.27607	-0.351285	0.29442	0.0506573	0.511272	0.280965	#N/A	#N/A	#N/A	#N/A	#N/A	#N/A
Obp57b	FBgn0043534	1.47464	-0.200951	0.201332	-0.14519	0.501407	0.178109	#N/A	#N/A	#N/A	#N/A	#N/A	#N/A
CG3253	FBgn0041706	1.9289	0.0141098	0.102967	0.286392	0.397973	0.342182	#N/A	#N/A	#N/A	#N/A	#N/A	#N/A
CG31077	FBgn0051077	1.22092	-0.339549	-0.00692749	0.0241091	0.389267	0.206688	#N/A	#N/A	#N/A	#N/A	#N/A	#N/A
CG14223	FBgn0031053	1.10361	-0.584984	-0.11526	-0.155514	0.367538	0.106012	#N/A	#N/A	#N/A	#N/A	#N/A	#N/A
CR43086	FBgn0262532	0.123609	1.27218	1.59138	2.2365	0.336546	1.28652	#N/A	#N/A	#N/A	#N/A	#N/A	#N/A
Mis12	FBgn0035725	1.22225	0.786515	0.216804	0.134688	0.234325	0.184507	#N/A	#N/A	#N/A	#N/A	#N/A	#N/A
per	FBgn0003068	1.0042	0.463762	0.212836	0.0766919	0.210966	0.143829	#N/A	#N/A	#N/A	#N/A	#N/A	#N/A
CG4783	FBgn0038756	1.49516	0.164573	0.0652544	0.00720593	0.201359	0.104283	#N/A	#N/A	#N/A	#N/A	#N/A	#N/A
Muc68D	FBgn0036203	1.11574	0.0612476	0.119321	-0.00181844	0.194914	0.096548	#N/A	#N/A	#N/A	#N/A	#N/A	#N/A
CG14125	FBgn0036232	1.26809	-0.279403	0.0871708	-0.00305035	0.185615	0.0912822	#N/A	#N/A	#N/A	#N/A	#N/A	#N/A
Lip3	FBgn0023495	0.644087	1.18276	-0.369082	0.563413	0.15951	0.361462	#N/A	#N/A	#N/A	#N/A	#N/A	#N/A
CG3906	FBgn0034871	1.66696	0.256533	-0.379918	-0.014287	0.153411	0.0695618	#N/A	#N/A	#N/A	#N/A	#N/A	#N/A
CG15408	FBgn0031523	1.40604	0.925828	-0.565244	0.1371	0.152273	0.144686	#N/A	#N/A	#N/A	#N/A	#N/A	#N/A
Phae2	FBgn0263235	1.37029	0.335202	-0.184904	-0.0721001	0.115701	0.0218003	#N/A	#N/A	#N/A	#N/A	#N/A	#N/A
CG42521	FBgn0260396	-0.452067	1.37469	-0.348507	2.03163	0.109085	1.07036	#N/A	#N/A	#N/A	#N/A	#N/A	#N/A
CG15547	FBgn0039809	0.0328847	1.18166	0.370563	0.121533	0.0899658	0.105749	#N/A	#N/A	#N/A	#N/A	#N/A	#N/A
CG43144	FBgn0262620	0.110125	2.32336	0.593513	0.378708	0.0893153	0.234012	#N/A	#N/A	#N/A	#N/A	#N/A	#N/A
CG34220	FBgn0085249	1.18801	0.339819	-0.0422864	-0.000977213	0.0877317	0.0433772	#N/A	#N/A	#N/A	#N/A	#N/A	#N/A
MtnD	FBgn0053192	0.788179	1.13845	0.0907583	0.152604	0.0753775	0.113991	#N/A	#N/A	#N/A	#N/A	#N/A	#N/A
CG43673	FBgn0263748	1.66054	0.208635	-0.489891	-0.158919	0.0610466	-0.048936	#N/A	#N/A	#N/A	#N/A	#N/A	#N/A
comm2	FBgn0041160	1.00864	0.84163	0.0647369	-0.020328	0.0485325	0.0141022	#N/A	#N/A	#N/A	#N/A	#N/A	#N/A
CG16926	FBgn0040732	0.929178	1.41523	-0.0735938	0.0268388	0.0414091	0.034124	#N/A	#N/A	#N/A	#N/A	#N/A	#N/A
CG14864	FBgn0038311	1.58402	0.674471	0.363376	-0.293665	0.0403854	-0.12664	#N/A	#N/A	#N/A	#N/A	#N/A	#N/A
Tsp39D	FBgn0032943	1.20353	0.894641	0.0746753	-0.0700503	0.025075	-0.0224876	#N/A	#N/A	#N/A	#N/A	#N/A	#N/A
Muc30E	FBgn0053300	-0.0726471	1.32384	1.39395	0.381043	0.0105743	0.195808	#N/A	#N/A	#N/A	#N/A	#N/A	#N/A
CG43196	FBgn0262825	1.15086	0.0426548	-0.235799	-0.308843	0.00372967	-0.152557	#N/A	#N/A	#N/A	#N/A	#N/A	#N/A
CG18609	FBgn0034382	1.66232	0.801181	-0.0318374	-0.124377	-0.00396421	-0.0641705	#N/A	#N/A	#N/A	#N/A	#N/A	#N/A
CG16904	FBgn0037763	1.18779	-0.0267111	-0.119542	-0.123416	-0.011682	-0.0675488	#N/A	#N/A	#N/A	#N/A	#N/A	#N/A
CG9458	FBgn0037765	2.10033	0.625631	-0.0683953	-0.180712	-0.0119085	-0.0963101	#N/A	#N/A	#N/A	#N/A	#N/A	#N/A
CG32750	FBgn0052750	-0.228815	1.34426	-1.18894	-0.174608	-0.0403381	-0.107473	#N/A	#N/A	#N/A	#N/A	#N/A	#N/A
CG9459	FBgn0037764	1.30765	-0.0615873	-0.197666	-0.309666	-0.0481572	-0.178912	#N/A	#N/A	#N/A	#N/A	#N/A	#N/A
Drs	FBgn0010381	1.84809	0.92656	0.588937	-0.150041	-0.0772021	-0.113622	#N/A	#N/A	#N/A	#N/A	#N/A	#N/A
CG13965	FBgn0032834	0.571714	1.65372	0.0042939	0.197969	-0.113705	0.042132	#N/A	#N/A	#N/A	#N/A	#N/A	#N/A
CG30031	FBgn0050031	0.642747	1.29971	-0.862488	-0.051692	-0.126629	-0.0891604	#N/A	#N/A	#N/A	#N/A	#N/A	#N/A
CG30025	FBgn0050025	0.723065	1.37717	-0.792118	-0.0426951	-0.128345	-0.08552	#N/A	#N/A	#N/A	#N/A	#N/A	#N/A
gammaTry	FBgn0010359	0.783919	1.38611	-0.773562	-0.0379879	-0.128828	-0.0834079	#N/A	#N/A	#N/A	#N/A	#N/A	#N/A
deltaTry	FBgn0010358	0.671273	1.17187	-1.3069	-0.108798	-0.137795	-0.123296	#N/A	#N/A	#N/A	#N/A	#N/A	#N/A
CG10014	FBgn0038000	0.730399	1.63027	1.38385	0.315554	-0.167577	0.0739882	#N/A	#N/A	#N/A	#N/A	#N/A	#N/A
CG15353	FBgn0040718	1.05724	0.553162	-0.601673	-0.369993	-0.168881	-0.269437	#N/A	#N/A	#N/A	#N/A	#N/A	#N/A
CG12541	FBgn0029930	1.07406	0.224467	-0.25345	-0.511699	-0.205512	-0.358606	#N/A	#N/A	#N/A	#N/A	#N/A	#N/A
CR43684	FBgn0263767	0.142152	2.05234	-1.1026	1.71996	-0.209339	0.755312	#N/A	#N/A	#N/A	#N/A	#N/A	#N/A
Acp32CD	FBgn0023415	0.213963	3.94713	-1.20604	1.26748	-0.210253	0.528616	#N/A	#N/A	#N/A	#N/A	#N/A	#N/A
CG15657	FBgn0034595	0.67099	1.10836	1.08243	0.454949	-0.21137	0.12179	#N/A	#N/A	#N/A	#N/A	#N/A	#N/A
CG17751	FBgn0038717	1.12131	0.491267	-1.16776	0.00298849	-0.228216	-0.112614	#N/A	#N/A	#N/A	#N/A	#N/A	#N/A
CG11125	FBgn0033174	0.690401	1.34352	0.242542	0.152912	-0.243137	-0.0451125	#N/A	#N/A	#N/A	#N/A	#N/A	#N/A
CG33189	FBgn0053189	0.882457	1.03808	0.161925	-0.0265827	-0.284144	-0.155364	#N/A	#N/A	#N/A	#N/A	#N/A	#N/A
swaPsi	FBgn0016974	0.432783	1.04428	1.06173	0.0232416	-0.30914	-0.142949	#N/A	#N/A	#N/A	#N/A	#N/A	#N/A
CG17633	FBgn0032144	0.379923	1.06665	-1.47346	-0.136357	-0.309542	-0.22295	#N/A	#N/A	#N/A	#N/A	#N/A	#N/A
CR43932	FBgn0264553	-0.447428	1.2216	-0.0965553	0.826232	-0.343801	0.241216	#N/A	#N/A	#N/A	#N/A	#N/A	#N/A
CG42789	FBgn0261860	-0.115465	3.14483	-0.32685	1.61619	-0.35099	0.6326	#N/A	#N/A	#N/A	#N/A	#N/A	#N/A
CG43267	FBgn0262948	-0.396185	1.8365	-0.408727	0.77758	-0.353125	0.212228	#N/A	#N/A	#N/A	#N/A	#N/A	#N/A
CG18628	FBgn0036091	0.661842	3.27884	-0.730924	0.524587	-0.361307	0.0816401	#DIV/0!	#DIV/0!	#DIV/0!	#DIV/0!	#DIV/0!	#DIV/0!
CG43396	FBgn0263270	0.0159554	1.03697	0.0877162	1.2471	-0.394028	0.426538	#N/A	#N/A	#N/A	#N/A	#N/A	#N/A
CG16719	FBgn0036029	0.999917	1.25524	0.283033	-0.161214	-0.409098	-0.285156	#N/A	#N/A	#N/A	#N/A	#N/A	#N/A
CR43805	FBgn0264349	-0.156563	1.60009	-0.806641	1.70668	-0.432994	0.636841	#N/A	#N/A	#N/A	#N/A	#N/A	#N/A
CG31496	FBgn0051496	0.101252	2.23705	0.139754	2.18005	-0.43518	0.872433	#N/A	#N/A	#N/A	#N/A	#N/A	#N/A
iotaTry	FBgn0015001	0.117188	1.27611	-1.77129	0.208599	-0.43727	-0.114335	#N/A	#N/A	#N/A	#N/A	#N/A	#N/A
CG15864	FBgn0040528	-0.122825	1.644	0.0462312	0.587348	-0.447367	0.0699903	#N/A	#N/A	#N/A	#N/A	#N/A	#N/A
CR43610	FBgn0263585	0.110296	1.18695	-0.21714	-0.0352977	-0.468057	-0.251677	#N/A	#N/A	#N/A	#N/A	#N/A	#N/A
CG43185	FBgn0262814	0.121635	2.64765	-0.938708	1.31482	-0.474678	0.420069	#N/A	#N/A	#N/A	#N/A	#N/A	#N/A
CG17217	FBgn0032419	0.588183	2.55414	0.750469	-0.224548	-0.491888	-0.358218	#N/A	#N/A	#N/A	#N/A	#N/A	#N/A
BG642167	FBgn0250831	-0.0670385	3.89451	-0.562864	1.25963	-0.502222	0.378703	#N/A	#N/A	#N/A	#N/A	#N/A	#N/A
CG9961	FBgn0031451	0.926617	1.48415	1.03508	-0.291235	-0.50855	-0.399892	#N/A	#N/A	#N/A	#N/A	#N/A	#N/A
mir-375	FBgn0262177	-0.228566	1.31995	-0.159212	0.141496	-0.508698	-0.183601	#N/A	#N/A	#N/A	#N/A	#N/A	#N/A
CG11983	FBgn0037654	0.677997	1.06291	0.617664	-0.29476	-0.520852	-0.407806	#N/A	#N/A	#N/A	#N/A	#N/A	#N/A
sphinx2	FBgn0052382	-0.301007	1.88554	-0.194623	1.49251	-0.549398	0.471557	#N/A	#N/A	#N/A	#N/A	#N/A	#N/A
CG31515	FBgn0051515	-0.178932	1.71798	-0.889262	2.08576	-0.551707	0.767027	#N/A	#N/A	#N/A	#N/A	#N/A	#N/A
CG6149	FBgn0036158	0.379239	2.9313	0.0906226	1.10146	-0.554302	0.273579	#N/A	#N/A	#N/A	#N/A	#N/A	#N/A
CG17097	FBgn0032275	-0.879717	4.36963	-1.23102	1.28623	-0.563112	0.361557	#N/A	#N/A	#N/A	#N/A	#N/A	#N/A
CG32199	FBgn0052199	-0.0167926	2.1532	0.307452	1.92925	-0.582456	0.673398	#N/A	#N/A	#N/A	#N/A	#N/A	#N/A
CG11977	FBgn0037650	0.162828	1.68277	1.13525	0.417075	-0.582465	-0.0826951	#N/A	#N/A	#N/A	#N/A	#N/A	#N/A
Mst57Db	FBgn0011669	-0.958463	4.72851	-0.858088	0.716505	-0.586136	0.0651847	#N/A	#N/A	#N/A	#N/A	#N/A	#N/A
Acp98AB	FBgn0263597	-0.74058	4.03022	-0.619709	0.72368	-0.58716	0.0682597	#N/A	#N/A	#N/A	#N/A	#N/A	#N/A
CG42470	FBgn0259960	-0.204624	1.77159	-1.35146	0.888936	-0.601934	0.143501	#N/A	#N/A	#N/A	#N/A	#N/A	#N/A
CG31105	FBgn0051105	0.171489	1.80002	0.620354	0.413887	-0.609507	-0.0978104	#N/A	#N/A	#N/A	#N/A	#N/A	#N/A
CR43456	FBgn0263410	0.0511814	1.66392	-0.292744	1.19151	-0.610291	0.290611	#N/A	#N/A	#N/A	#N/A	#N/A	#N/A
CG30438	FBgn0050438	-0.54553	1.24633	-0.258621	-0.015924	-0.61154	-0.313732	#N/A	#N/A	#N/A	#N/A	#N/A	#N/A
nmdyn-D7	FBgn0028997	0.77931	1.18598	0.96321	-0.0564727	-0.631092	-0.343782	#N/A	#N/A	#N/A	#N/A	#N/A	#N/A
CR34285	FBgn0085314	-0.163829	1.25559	-0.539862	1.5484	-0.631126	0.458636	#N/A	#N/A	#N/A	#N/A	#N/A	#N/A
CG5987	FBgn0039501	0.38193	1.00719	-0.131567	-0.0166907	-0.633212	-0.324951	#N/A	#N/A	#N/A	#N/A	#N/A	#N/A
Jon65Aii	FBgn0035666	-0.170652	1.45497	-3.45408	-0.197443	-0.648996	-0.42322	#N/A	#N/A	#N/A	#N/A	#N/A	#N/A
CG18234	FBgn0036794	-0.113436	2.58446	0.24892	1.68591	-0.649757	0.518079	#N/A	#N/A	#N/A	#N/A	#N/A	#N/A
CG11828	FBgn0039616	-0.00445318	2.09414	0.0762006	1.23921	-0.650894	0.294157	#N/A	#N/A	#N/A	#N/A	#N/A	#N/A
CG43254	FBgn0262899	0.0244122	3.70029	-0.695733	1.01384	-0.654002	0.17992	#N/A	#N/A	#N/A	#N/A	#N/A	#N/A
CG42481	FBgn0259971	-0.511725	4.96179	-0.919577	0.998355	-0.654815	0.17177	#N/A	#N/A	#N/A	#N/A	#N/A	#N/A
CG43788	FBgn0264329	-0.936456	3.44058	-0.582441	0.693735	-0.673031	0.0103519	#N/A	#N/A	#N/A	#N/A	#N/A	#N/A
CG43931	FBgn0264552	0.186044	2.05241	-0.359246	1.1871	-0.680722	0.253189	#N/A	#N/A	#N/A	#N/A	#N/A	#N/A
CG43789	FBgn0264330	-0.191064	1.72337	0.205556	0.162027	-0.686125	-0.262049	#N/A	#N/A	#N/A	#N/A	#N/A	#N/A
CG18233	FBgn0036795	-0.312277	1.59556	-0.88774	1.53281	-0.691539	0.420636	#N/A	#N/A	#N/A	#N/A	#N/A	#N/A
CG43354	FBgn0263086	-0.1801	1.03912	-0.738841	0.571021	-0.691986	-0.0604824	#N/A	#N/A	#N/A	#N/A	#N/A	#N/A
CG15116	FBgn0034415	-0.0499355	2.99877	-0.80992	1.12752	-0.695275	0.216122	#N/A	#N/A	#N/A	#N/A	#N/A	#N/A
CG43222	FBgn0262858	0.665046	1.22722	-0.293528	-0.210547	-0.699192	-0.454869	#N/A	#N/A	#N/A	#N/A	#N/A	#N/A
Sfp38D	FBgn0261058	-0.126495	1.72086	-1.24088	1.38306	-0.701476	0.340793	#N/A	#N/A	#N/A	#N/A	#N/A	#N/A
BG642312	FBgn0047334	-0.207185	4.09691	-0.330802	0.242075	-0.710995	-0.23446	#DIV/0!	#DIV/0!	#DIV/0!	#DIV/0!	#DIV/0!	#DIV/0!
CG18231	FBgn0036796	0.054583	2.19566	0.374336	1.30935	-0.716665	0.296342	#N/A	#N/A	#N/A	#N/A	#N/A	#N/A
CG43272	FBgn0262961	-0.0288487	3.607	-0.756211	0.948592	-0.722462	0.113065	#N/A	#N/A	#N/A	#N/A	#N/A	#N/A
CG43392	FBgn0263249	0.0563091	4.36682	-0.666126	0.941765	-0.730662	0.105551	#N/A	#N/A	#N/A	#N/A	#N/A	#N/A
CG32201	FBgn0052201	0.00155044	1.40342	-0.377365	1.36047	-0.730679	0.314898	#N/A	#N/A	#N/A	#N/A	#N/A	#N/A
sphinx1	FBgn0052383	0.121492	1.45499	0.988685	0.594805	-0.741443	-0.0733189	#N/A	#N/A	#N/A	#N/A	#N/A	#N/A
Mst36Fb	FBgn0261349	0.747373	1.20811	-0.389786	-0.260545	-0.747275	-0.50391	#N/A	#N/A	#N/A	#N/A	#N/A	#N/A
CG4271	FBgn0031409	-0.149883	1.67022	-0.668001	1.84385	-0.750521	0.546666	#N/A	#N/A	#N/A	#N/A	#N/A	#N/A
CR43994	FBgn0264726	0.149303	2.97795	-1.63965	0.442487	-0.75239	-0.154951	#N/A	#N/A	#N/A	#N/A	#N/A	#N/A
CG43146	FBgn0262622	0.0159024	2.31366	0.725254	1.38523	-0.760154	0.312538	#N/A	#N/A	#N/A	#N/A	#N/A	#N/A
CG30355	FBgn0050355	0.679422	1.19698	0.00132952	-0.132626	-0.765538	-0.449082	#N/A	#N/A	#N/A	#N/A	#N/A	#N/A
CG14072	FBgn0032318	0.00299932	2.7609	-0.689335	1.04311	-0.773763	0.134676	#N/A	#N/A	#N/A	#N/A	#N/A	#N/A
CG4907	FBgn0039010	0.109932	1.11789	1.27352	0.370057	-0.773802	-0.201872	#N/A	#N/A	#N/A	#N/A	#N/A	#N/A
CG11113	FBgn0033165	0.0841128	1.58501	-0.183007	0.565132	-0.773904	-0.104386	#N/A	#N/A	#N/A	#N/A	#N/A	#N/A
CG43063	FBgn0262365	-0.094299	1.85683	-1.95867	1.05643	-0.779946	0.138243	#N/A	#N/A	#N/A	#N/A	#N/A	#N/A
CG43130	FBgn0262604	0.822695	1.10791	0.670157	0.0630429	-0.7815	-0.359228	#N/A	#N/A	#N/A	#N/A	#N/A	#N/A
Spn75F	FBgn0052203	-0.13574	3.01217	-1.33219	1.27382	-0.788438	0.242694	#DIV/0!	#DIV/0!	#DIV/0!	#DIV/0!	#DIV/0!	#DIV/0!
PH4alphaNE3	FBgn0051017	-0.117316	2.49886	-0.670452	1.61679	-0.797086	0.409853	#N/A	#N/A	#N/A	#N/A	#N/A	#N/A
CR43152	FBgn0262682	0.986361	1.03283	0.794098	-0.33255	-0.801617	-0.567084	#N/A	#N/A	#N/A	#N/A	#N/A	#N/A
CG34299	FBgn0085328	-0.129415	2.54354	-0.704555	1.43205	-0.82326	0.304393	#N/A	#N/A	#N/A	#N/A	#N/A	#N/A
CG43362	FBgn0263094	-0.161485	1.06464	-0.172398	0.7033	-0.823625	-0.0601625	#N/A	#N/A	#N/A	#N/A	#N/A	#N/A
CG13088	FBgn0032047	0.500093	1.18607	0.103008	-0.0833275	-0.828036	-0.455682	#N/A	#N/A	#N/A	#N/A	#N/A	#N/A
CG12558	FBgn0039599	-0.220786	1.64994	-1.18623	1.42076	-0.83096	0.294898	#N/A	#N/A	#N/A	#N/A	#N/A	#N/A
CG31524	FBgn0051524	-0.116642	1.70227	-0.947399	1.86069	-0.837885	0.511401	#N/A	#N/A	#N/A	#N/A	#N/A	#N/A
CG43123	FBgn0262583	-0.29946	1.80389	-0.339142	1.13391	-0.843648	0.145132	#N/A	#N/A	#N/A	#N/A	#N/A	#N/A
PH4alphaNE2	FBgn0039783	-0.0869991	2.17139	-0.689549	1.55955	-0.84936	0.355096	#N/A	#N/A	#N/A	#N/A	#N/A	#N/A
CG43307	FBgn0262999	0.0313294	1.4528	-0.193108	1.12457	-0.849613	0.13748	#N/A	#N/A	#N/A	#N/A	#N/A	#N/A
CG18336	FBgn0040763	0.608278	1.16522	-0.479963	-0.321225	-0.849771	-0.585498	#N/A	#N/A	#N/A	#N/A	#N/A	#N/A
CG6761	FBgn0036031	0.751833	1.09414	0.117682	-0.327503	-0.850764	-0.589133	#N/A	#N/A	#N/A	#N/A	#N/A	#N/A
CG12828	FBgn0033145	-0.258015	2.47852	-0.360629	1.74598	-0.863493	0.441241	#N/A	#N/A	#N/A	#N/A	#N/A	#N/A
CG43050	FBgn0262352	0.176847	2.24544	0.283338	1.15514	-0.866468	0.144336	#N/A	#N/A	#N/A	#N/A	#N/A	#N/A
CG43111	FBgn0262571	0.0608494	3.00188	-0.190576	0.897327	-0.868816	0.0142557	#N/A	#N/A	#N/A	#N/A	#N/A	#N/A
CG43350	FBgn0263082	-0.28633	2.18176	-0.792601	0.252393	-0.876439	-0.312023	#N/A	#N/A	#N/A	#N/A	#N/A	#N/A
CG42824	FBgn0262006	0.0907512	1.16368	0.154844	0.832316	-0.879904	-0.0237943	#N/A	#N/A	#N/A	#N/A	#N/A	#N/A
CG13557	FBgn0034867	-0.173602	1.91449	-1.10772	0.731904	-0.88009	-0.0740932	#N/A	#N/A	#N/A	#N/A	#N/A	#N/A
CG32313	FBgn0052313	0.756144	1.34719	1.61327	-0.0282943	-0.884043	-0.456169	#N/A	#N/A	#N/A	#N/A	#N/A	#N/A
CG10651	FBgn0032853	0.0769297	1.44796	-0.129353	0.50688	-0.88976	-0.19144	#N/A	#N/A	#N/A	#N/A	#N/A	#N/A
CG13946	FBgn0040725	0.43577	1.5555	2.27821	-0.63948	-0.896536	-0.768008	#N/A	#N/A	#N/A	#N/A	#N/A	#N/A
CG31473	FBgn0051473	0.985698	1.28678	-0.320303	-0.339703	-0.904051	-0.621877	#N/A	#N/A	#N/A	#N/A	#N/A	#N/A
CR43634	FBgn0263625	-0.170368	2.36372	-0.351048	0.815709	-0.923376	-0.0538335	#N/A	#N/A	#N/A	#N/A	#N/A	#N/A
CG42471	FBgn0259961	-0.173732	2.47078	-1.52775	1.09918	-0.925124	0.0870295	#N/A	#N/A	#N/A	#N/A	#N/A	#N/A
CG43319	FBgn0263024	-0.301702	4.17886	-1.14419	0.156272	-0.929959	-0.386843	#N/A	#N/A	#N/A	#N/A	#N/A	#N/A
CG42827	FBgn0262009	0.685069	1.0754	0.0534647	-0.126636	-0.932848	-0.529742	#N/A	#N/A	#N/A	#N/A	#N/A	#N/A
CG30486	FBgn0050486	-0.0560827	1.69259	-0.326706	0.583809	-0.934144	-0.175168	#N/A	#N/A	#N/A	#N/A	#N/A	#N/A
CR43754	FBgn0264085	0.0219083	2.35792	0.0947074	1.42387	-0.934321	0.244775	#N/A	#N/A	#N/A	#N/A	#N/A	#N/A
CG43993	FBgn0264725	0.0714753	1.53095	0.211993	0.245551	-0.937995	-0.346222	#N/A	#N/A	#N/A	#N/A	#N/A	#N/A
CG13455	FBgn0036498	0.337975	1.00119	0.2888	-0.116957	-0.943796	-0.530376	#N/A	#N/A	#N/A	#N/A	#N/A	#N/A
CG42852	FBgn0262099	-0.388005	4.59966	-0.798233	0.852474	-0.95416	-0.0508426	#N/A	#N/A	#N/A	#N/A	#N/A	#N/A
CG1835	FBgn0031127	0.420451	1.21662	0.258731	-0.0721197	-0.954925	-0.513523	#N/A	#N/A	#N/A	#N/A	#N/A	#N/A
CG7742	FBgn0031690	0.554911	1.55852	-0.453117	-0.217529	-0.958101	-0.587815	#N/A	#N/A	#N/A	#N/A	#N/A	#N/A
Sfp84E	FBgn0259974	-0.207847	2.54317	-0.923197	1.60834	-0.971744	0.318298	#DIV/0!	#DIV/0!	#DIV/0!	#DIV/0!	#DIV/0!	#DIV/0!
CG31021	FBgn0051021	-0.0944604	1.66355	-1.45403	1.08544	-0.98832	0.0485597	#N/A	#N/A	#N/A	#N/A	#N/A	#N/A
CG31493	FBgn0051493	-0.0136774	1.58541	-0.311521	0.819478	-0.989668	-0.0850947	#N/A	#N/A	#N/A	#N/A	#N/A	#N/A
CR43975	FBgn0264706	0.634718	1.14342	-0.0751304	-0.795189	-0.990554	-0.892872	#N/A	#N/A	#N/A	#N/A	#N/A	#N/A
CG4995	FBgn0032219	0.839529	1.27505	0.212537	-0.284726	-1.0173	-0.651014	#N/A	#N/A	#N/A	#N/A	#N/A	#N/A
CG7848	FBgn0034127	0.499587	1.13026	0.373148	-0.482511	-1.01955	-0.751031	#N/A	#N/A	#N/A	#N/A	#N/A	#N/A
CG7069	FBgn0038952	0.877378	1.64369	-0.404113	-0.180479	-1.02789	-0.604187	#N/A	#N/A	#N/A	#N/A	#N/A	#N/A
Sfp33A1	FBgn0259962	0.093983	2.81188	-0.942752	0.630113	-1.03012	-0.200005	#N/A	#N/A	#N/A	#N/A	#N/A	#N/A
osm-1	FBgn0035317	0.86378	1.18459	-0.88457	-1.14913	-1.04355	-1.09634	#N/A	#N/A	#N/A	#N/A	#N/A	#N/A
CG9313	FBgn0034566	0.569207	1.26834	-0.397984	-0.332383	-1.04691	-0.689646	#N/A	#N/A	#N/A	#N/A	#N/A	#N/A
CG11864	FBgn0028944	0.0691444	1.8549	0.222426	1.01995	-1.05152	-0.0157876	#N/A	#N/A	#N/A	#N/A	#N/A	#N/A
Sfp96F	FBgn0261061	-0.0367554	3.28987	-0.583824	0.41676	-1.07208	-0.327662	#DIV/0!	#DIV/0!	#DIV/0!	#DIV/0!	#DIV/0!	#DIV/0!
CycB	FBgn0000405	2.04015	0.825688	0.124309	-1.28046	-1.07725	-1.17885	#N/A	#N/A	#N/A	#N/A	#N/A	#N/A
CR43715	FBgn0263868	-0.0100663	1.58431	-1.24916	0.0801475	-1.0849	-0.502375	#N/A	#N/A	#N/A	#N/A	#N/A	#N/A
CG31697	FBgn0051697	0.777554	1.54502	0.291618	0.0908376	-1.09044	-0.4998	#N/A	#N/A	#N/A	#N/A	#N/A	#N/A
CG11703	FBgn0038690	0.411493	1.35184	-1.56595	-0.18536	-1.09424	-0.639799	#N/A	#N/A	#N/A	#N/A	#N/A	#N/A
Ubc84D	FBgn0017456	0.750383	1.25157	-0.140376	-0.413011	-1.11457	-0.763792	#N/A	#N/A	#N/A	#N/A	#N/A	#N/A
CR43239	FBgn0262884	-0.0471908	3.35283	-1.15039	0.736543	-1.12046	-0.191956	#N/A	#N/A	#N/A	#N/A	#N/A	#N/A
CG15641	FBgn0030643	-0.122458	2.3473	-0.0682408	0.887389	-1.13127	-0.121939	#N/A	#N/A	#N/A	#N/A	#N/A	#N/A
msopa	FBgn0004414	0.00871002	3.27452	-0.00214282	1.16966	-1.13927	0.0151934	#N/A	#N/A	#N/A	#N/A	#N/A	#N/A
CR43358	FBgn0263090	-0.0134662	1.77337	-0.46405	1.00532	-1.14849	-0.0715848	#N/A	#N/A	#N/A	#N/A	#N/A	#N/A
CG34041	FBgn0054041	-0.0342944	2.22653	-1.033	1.16072	-1.17807	-0.00867579	#N/A	#N/A	#N/A	#N/A	#N/A	#N/A
CG30156	FBgn0050156	0.59302	1.1735	0.0570434	-0.246145	-1.17842	-0.712283	#N/A	#N/A	#N/A	#N/A	#N/A	#N/A
CG42465	FBgn0259955	0.0161372	1.31615	0.871549	0.645188	-1.18087	-0.267838	#N/A	#N/A	#N/A	#N/A	#N/A	#N/A
CG6332	FBgn0038921	0.958636	1.71577	-0.315639	-0.118728	-1.18251	-0.650617	#N/A	#N/A	#N/A	#N/A	#N/A	#N/A
CG6980	FBgn0039228	0.566156	1.23491	-0.164066	-0.28398	-1.18882	-0.736398	#N/A	#N/A	#N/A	#N/A	#N/A	#N/A
CG43404	FBgn0263323	-0.0530355	1.66769	-1.25142	0.762492	-1.19192	-0.214715	#N/A	#N/A	#N/A	#N/A	#N/A	#N/A
CG42467	FBgn0259957	-0.423711	1.40736	0.721244	1.28354	-1.19843	0.0425593	#N/A	#N/A	#N/A	#N/A	#N/A	#N/A
CG31161	FBgn0051161	0.646742	1.42615	-0.16171	-0.201509	-1.20698	-0.704245	#N/A	#N/A	#N/A	#N/A	#N/A	#N/A
CG11362	FBgn0034737	0.672246	1.0153	0.0432284	-0.71141	-1.21068	-0.961043	#N/A	#N/A	#N/A	#N/A	#N/A	#N/A
fan	FBgn0028379	0.494395	1.36757	-0.16348	-0.203593	-1.21632	-0.709955	#N/A	#N/A	#N/A	#N/A	#N/A	#N/A
CG6569	FBgn0038909	0.543911	1.19814	-0.0675611	-0.358884	-1.22377	-0.791328	#N/A	#N/A	#N/A	#N/A	#N/A	#N/A
orb	FBgn0004882	0.0783962	1.19438	0.390505	0.377119	-1.2388	-0.430839	#N/A	#N/A	#N/A	#N/A	#N/A	#N/A
CG8420	FBgn0037664	0.111064	1.50848	-0.274213	0.332878	-1.2412	-0.45416	#N/A	#N/A	#N/A	#N/A	#N/A	#N/A
CG5280	FBgn0035952	0.893348	1.58988	-0.188327	-0.358294	-1.24144	-0.799867	#N/A	#N/A	#N/A	#N/A	#N/A	#N/A
CG42869	FBgn0262143	-0.163412	2.17863	-1.46983	0.0277928	-1.25597	-0.614087	#N/A	#N/A	#N/A	#N/A	#N/A	#N/A
CG6279	FBgn0036125	0.514112	1.49361	0.0819641	-0.0221315	-1.26501	-0.643573	#N/A	#N/A	#N/A	#N/A	#N/A	#N/A
CG13581	FBgn0035014	0.530791	1.1206	-0.0154748	-0.245505	-1.27398	-0.759742	#N/A	#N/A	#N/A	#N/A	#N/A	#N/A
CG8236	FBgn0037626	0.624536	1.0552	-0.187697	-0.758252	-1.27581	-1.01703	#N/A	#N/A	#N/A	#N/A	#N/A	#N/A
CG17122	FBgn0036962	0.547161	1.18682	-0.201893	-0.479544	-1.27952	-0.879532	#N/A	#N/A	#N/A	#N/A	#N/A	#N/A
Obp56i	FBgn0043532	0.0371558	1.11482	-1.71754	0.427886	-1.2823	-0.427208	#N/A	#N/A	#N/A	#N/A	#N/A	#N/A
CG31029	FBgn0051029	0.772656	1.82362	-0.775575	-0.171571	-1.286	-0.728786	#N/A	#N/A	#N/A	#N/A	#N/A	#N/A
CG42782	FBgn0261853	-0.362052	1.22702	-0.523283	0.608737	-1.29662	-0.343942	#N/A	#N/A	#N/A	#N/A	#N/A	#N/A
Sfp23F	FBgn0259949	-0.245163	2.47968	-2.10407	0.780242	-1.29683	-0.258294	#DIV/0!	#DIV/0!	#DIV/0!	#DIV/0!	#DIV/0!	#DIV/0!
fzr2	FBgn0034937	0.449082	1.02307	0.277656	-0.0810017	-1.30578	-0.693391	#N/A	#N/A	#N/A	#N/A	#N/A	#N/A
CG6752	FBgn0038296	0.458732	1.02299	-0.16719	-0.282951	-1.30617	-0.794561	#N/A	#N/A	#N/A	#N/A	#N/A	#N/A
CG14589	FBgn0033063	0.966112	1.61125	0.00173849	-0.470688	-1.31457	-0.892631	#N/A	#N/A	#N/A	#N/A	#N/A	#N/A
CG6059	FBgn0039491	0.212155	1.01679	-0.00719715	-0.0248932	-1.35385	-0.68937	#N/A	#N/A	#N/A	#N/A	#N/A	#N/A
CG2533	FBgn0030319	0.898574	1.42193	0.605735	-0.18113	-1.35835	-0.769739	#N/A	#N/A	#N/A	#N/A	#N/A	#N/A
P5CDh2	FBgn0053092	0.632277	1.08009	-0.206156	-0.111061	-1.37445	-0.742755	#N/A	#N/A	#N/A	#N/A	#N/A	#N/A
CG12506	FBgn0031276	0.797226	1.40008	1.44143	-0.195587	-1.3882	-0.791894	#N/A	#N/A	#N/A	#N/A	#N/A	#N/A
CG18193	FBgn0037579	0.674241	1.21819	-0.662127	-0.277951	-1.38915	-0.833551	#N/A	#N/A	#N/A	#N/A	#N/A	#N/A
Sfp33A4	FBgn0261056	-0.116302	2.17218	-0.743005	-0.382285	-1.3951	-0.888692	#N/A	#N/A	#N/A	#N/A	#N/A	#N/A
CG30356	FBgn0050356	0.576647	1.13244	0.0869216	-0.393012	-1.39787	-0.895442	#N/A	#N/A	#N/A	#N/A	#N/A	#N/A
Sfp36F	FBgn0261057	0.0929099	1.95661	-0.451356	0.043643	-1.41606	-0.686207	#N/A	#N/A	#N/A	#N/A	#N/A	#N/A
CG13838	FBgn0039041	0.338589	1.1887	-0.314925	-0.000276878	-1.41851	-0.709396	#N/A	#N/A	#N/A	#N/A	#N/A	#N/A
lectin-21Ca	FBgn0040107	-0.17243	1.7473	0.779642	1.27197	-1.42643	-0.0772323	#N/A	#N/A	#N/A	#N/A	#N/A	#N/A
CG15458	FBgn0040651	0.502615	1.02229	0.596328	-0.708723	-1.4271	-1.06791	#N/A	#N/A	#N/A	#N/A	#N/A	#N/A
CR43633	FBgn0263624	-0.04747	2.21331	-0.759169	-0.213916	-1.42781	-0.820865	#N/A	#N/A	#N/A	#N/A	#N/A	#N/A
CG13843	FBgn0038993	0.521443	1.32132	0.127867	-0.0528704	-1.45492	-0.753897	#N/A	#N/A	#N/A	#N/A	#N/A	#N/A
CG32295	FBgn0260480	0.621885	1.16895	0.792207	-0.400997	-1.46239	-0.931694	#N/A	#N/A	#N/A	#N/A	#N/A	#N/A
CG6470	FBgn0030933	0.487833	1.68658	-0.220363	-0.0690253	-1.4985	-0.783764	#N/A	#N/A	#N/A	#N/A	#N/A	#N/A
CG7196	FBgn0031944	0.64138	1.44757	-0.211117	-0.322748	-1.51049	-0.916619	#N/A	#N/A	#N/A	#N/A	#N/A	#N/A
CG8006	FBgn0035857	0.437656	1.21062	-1.17046	0.102188	-1.52414	-0.710978	#N/A	#N/A	#N/A	#N/A	#N/A	#N/A
CG16739	FBgn0034505	0.864032	1.47397	-0.684613	-0.341598	-1.53995	-0.940776	#N/A	#N/A	#N/A	#N/A	#N/A	#N/A
CG31546	FBgn0051546	0.647799	1.33983	-0.579373	-0.206695	-1.54141	-0.874053	#N/A	#N/A	#N/A	#N/A	#N/A	#N/A
CG32832	FBgn0052832	0.421005	1.43241	-1.16543	0.0898819	-1.55784	-0.733981	#N/A	#N/A	#N/A	#N/A	#N/A	#N/A
CG43935	FBgn0264563	0.811677	1.674	-0.811094	-0.226482	-1.55895	-0.892717	#N/A	#N/A	#N/A	#N/A	#N/A	#N/A
Rcd7	FBgn0260461	0.875926	1.73995	-0.390616	-0.24932	-1.56105	-0.905184	#N/A	#N/A	#N/A	#N/A	#N/A	#N/A
Ucp4C	FBgn0031757	0.521729	1.25806	0.748739	-0.370684	-1.56265	-0.966669	#N/A	#N/A	#N/A	#N/A	#N/A	#N/A
CG15461	FBgn0040649	0.572453	1.088	0.484423	-0.238303	-1.56549	-0.901895	#N/A	#N/A	#N/A	#N/A	#N/A	#N/A
CG43169	FBgn0262788	0.835574	1.4203	-0.323548	-0.415823	-1.56579	-0.990807	#N/A	#N/A	#N/A	#N/A	#N/A	#N/A
rha	FBgn0027376	0.42048	1.14414	0.200971	-0.373779	-1.56761	-0.970692	#N/A	#N/A	#N/A	#N/A	#N/A	#N/A
CG12229	FBgn0036723	0.902281	1.59715	-0.503192	-0.337177	-1.58562	-0.961397	#N/A	#N/A	#N/A	#N/A	#N/A	#N/A
CG3323	FBgn0029750	0.180683	1.00544	-0.00912782	-0.377761	-1.58628	-0.982019	#N/A	#N/A	#N/A	#N/A	#N/A	#N/A
Met75Ca	FBgn0028416	-0.91044	2.48941	-0.614951	2.03323	-1.59853	0.217351	#DIV/0!	#DIV/0!	#DIV/0!	#DIV/0!	#DIV/0!	#DIV/0!
CG18371	FBgn0033893	0.297247	1.14766	-0.340505	-0.372853	-1.59904	-0.985945	#N/A	#N/A	#N/A	#N/A	#N/A	#N/A
CR43752	FBgn0264083	-0.143351	1.77174	-1.62784	0.9129	-1.61677	-0.351935	#N/A	#N/A	#N/A	#N/A	#N/A	#N/A
CG5781	FBgn0032448	0.577934	1.1053	-0.298391	-0.399885	-1.62039	-1.01014	#N/A	#N/A	#N/A	#N/A	#N/A	#N/A
CG31230	FBgn0051230	0.851625	1.26194	0.225206	-0.751144	-1.62898	-1.19006	#N/A	#N/A	#N/A	#N/A	#N/A	#N/A
fzo	FBgn0011596	0.370919	1.0726	0.831542	-0.163756	-1.63222	-0.897989	#N/A	#N/A	#N/A	#N/A	#N/A	#N/A
CG5050	FBgn0032637	0.101382	1.01657	0.242993	-0.238847	-1.63399	-0.936418	#N/A	#N/A	#N/A	#N/A	#N/A	#N/A
CG18568	FBgn0033888	0.581449	1.35987	-0.67922	-0.563289	-1.64526	-1.10428	#N/A	#N/A	#N/A	#N/A	#N/A	#N/A
CG31803	FBgn0051803	0.585157	1.10291	-0.314252	-0.731843	-1.64653	-1.18919	#N/A	#N/A	#N/A	#N/A	#N/A	#N/A
CG10834	FBgn0032972	0.620059	1.0895	0.298653	-0.665804	-1.66716	-1.16648	#N/A	#N/A	#N/A	#N/A	#N/A	#N/A
Msi	FBgn0043025	0.527579	1.17731	-0.949138	-0.153324	-1.67336	-0.913344	#N/A	#N/A	#N/A	#N/A	#N/A	#N/A
CG14154	FBgn0036093	0.685538	1.37806	-0.473871	-0.502809	-1.68671	-1.09476	#N/A	#N/A	#N/A	#N/A	#N/A	#N/A
CG6441	FBgn0031920	0.917415	1.86071	-0.0118414	-0.0703896	-1.69496	-0.882677	#N/A	#N/A	#N/A	#N/A	#N/A	#N/A
CG7295	FBgn0031372	0.736397	1.80524	-1.14371	-0.568699	-1.69763	-1.13316	#N/A	#N/A	#N/A	#N/A	#N/A	#N/A
CG12035	FBgn0035263	0.406484	1.15909	0.396154	-0.153842	-1.71302	-0.933432	#N/A	#N/A	#N/A	#N/A	#N/A	#N/A
CG30393	FBgn0050393	0.74271	1.54539	0.539295	-0.254993	-1.72422	-0.989606	#N/A	#N/A	#N/A	#N/A	#N/A	#N/A
CG15800	FBgn0034904	0.53462	1.31456	-1.09388	-0.0167424	-1.72555	-0.871147	#N/A	#N/A	#N/A	#N/A	#N/A	#N/A
CG12992	FBgn0030846	0.632783	1.24179	-0.0671467	-0.268175	-1.74154	-1.00486	#N/A	#N/A	#N/A	#N/A	#N/A	#N/A
fig	FBgn0039694	0.789794	1.30719	0.0906864	-0.134546	-1.74396	-0.939253	#N/A	#N/A	#N/A	#N/A	#N/A	#N/A
CG4681	FBgn0069913	0.542837	1.39289	-0.305166	-0.167524	-1.75849	-0.963007	#N/A	#N/A	#N/A	#N/A	#N/A	#N/A
CG34434	FBgn0250904	0.77337	1.66996	1.70608	-0.769212	-1.79908	-1.28415	#N/A	#N/A	#N/A	#N/A	#N/A	#N/A
CG31861	FBgn0051861	0.906006	1.6111	0.212717	-0.767302	-1.8257	-1.2965	#N/A	#N/A	#N/A	#N/A	#N/A	#N/A
CG13733	FBgn0036729	0.887262	1.63761	-0.256914	-0.375838	-1.83503	-1.10544	#N/A	#N/A	#N/A	#N/A	#N/A	#N/A
Anp	FBgn0000094	-0.768196	1.39715	-0.211952	1.79609	-1.83625	-0.0200768	#N/A	#N/A	#N/A	#N/A	#N/A	#N/A
CG7794	FBgn0038565	0.736832	1.43786	-0.670477	-0.218349	-1.87886	-1.0486	#N/A	#N/A	#N/A	#N/A	#N/A	#N/A
CR33318	FBgn0053318	0.33253	1.12005	0.0564247	-0.596017	-1.88327	-1.23964	#N/A	#N/A	#N/A	#N/A	#N/A	#N/A
CG43209	FBgn0262845	0.898938	1.7263	-0.577615	-0.138503	-1.93707	-1.03778	#N/A	#N/A	#N/A	#N/A	#N/A	#N/A
CG32847	FBgn0052847	0.881058	1.2743	-1.39517	-0.245147	-1.94348	-1.09431	#N/A	#N/A	#N/A	#N/A	#N/A	#N/A
CG14676	FBgn0037388	0.568799	1.33345	-0.161678	-0.115349	-1.95477	-1.03506	#N/A	#N/A	#N/A	#N/A	#N/A	#N/A
RpS19b	FBgn0039129	0.699902	1.27046	1.13415	-0.708216	-1.9864	-1.34731	#N/A	#N/A	#N/A	#N/A	#N/A	#N/A
CG15459	FBgn0031108	0.8434	1.48817	-0.740661	-0.276734	-1.99053	-1.13363	#N/A	#N/A	#N/A	#N/A	#N/A	#N/A
CG15172	FBgn0032740	0.66205	1.17627	-0.752221	-0.70902	-2.01817	-1.3636	#N/A	#N/A	#N/A	#N/A	#N/A	#N/A
CG32181	FBgn0052181	0.579784	1.51243	-0.146055	-0.0818723	-2.02779	-1.05483	#N/A	#N/A	#N/A	#N/A	#N/A	#N/A
CG10899	FBgn0039235	0.420678	1.19181	-0.373922	-0.0276925	-2.05644	-1.04207	#N/A	#N/A	#N/A	#N/A	#N/A	#N/A
CG10589	FBgn0037035	0.607756	1.4432	-0.700451	-0.405897	-2.07694	-1.24142	#N/A	#N/A	#N/A	#N/A	#N/A	#N/A
CG12111	FBgn0030050	0.854501	1.27954	0.197874	-0.582895	-2.09958	-1.34124	#N/A	#N/A	#N/A	#N/A	#N/A	#N/A
CG34188	FBgn0085217	0.548336	1.14262	0.899429	-0.769446	-2.10363	-1.43654	#N/A	#N/A	#N/A	#N/A	#N/A	#N/A
CG15136	FBgn0032625	0.635816	1.06731	-0.072077	-0.559787	-2.10511	-1.33245	#N/A	#N/A	#N/A	#N/A	#N/A	#N/A
CG30056	FBgn0050056	0.905627	1.64073	-1.0977	-0.549318	-2.11045	-1.32988	#N/A	#N/A	#N/A	#N/A	#N/A	#N/A
CG34012	FBgn0054012	0.776382	1.04454	-0.129941	-0.209166	-2.11074	-1.15995	#N/A	#N/A	#N/A	#N/A	#N/A	#N/A
CG32591	FBgn0052591	0.927366	1.88536	-0.315113	-0.204588	-2.11252	-1.15855	#N/A	#N/A	#N/A	#N/A	#N/A	#N/A
Rtnl2	FBgn0015831	0.448161	1.53635	0.188776	-0.365341	-2.11805	-1.2417	#N/A	#N/A	#N/A	#N/A	#N/A	#N/A
CG9589	FBgn0038361	0.852375	1.37331	-0.337953	-0.211234	-2.12475	-1.16799	#N/A	#N/A	#N/A	#N/A	#N/A	#N/A
CG15530	FBgn0039752	0.871731	1.44576	-0.273179	-0.488449	-2.1309	-1.30967	#N/A	#N/A	#N/A	#N/A	#N/A	#N/A
Tim13	FBgn0036204	0.838929	1.21367	-1.42391	-0.548718	-2.13394	-1.34133	#N/A	#N/A	#N/A	#N/A	#N/A	#N/A
CG31816	FBgn0051816	0.919232	1.14414	-0.850839	-0.291697	-2.14227	-1.21698	#N/A	#N/A	#N/A	#N/A	#N/A	#N/A
CG31806	FBgn0051806	0.652949	1.4422	-1.16107	-0.277004	-2.15352	-1.21526	#N/A	#N/A	#N/A	#N/A	#N/A	#N/A
CG6481	FBgn0030936	0.619898	1.32744	-0.356811	-0.505505	-2.15849	-1.332	#N/A	#N/A	#N/A	#N/A	#N/A	#N/A
CG10177	FBgn0039083	0.39298	1.11966	-0.463469	-0.101135	-2.15853	-1.12983	#N/A	#N/A	#N/A	#N/A	#N/A	#N/A
CG32440	FBgn0052440	0.967879	1.34794	-1.55276	-0.858239	-2.16169	-1.50997	#N/A	#N/A	#N/A	#N/A	#N/A	#N/A
CG11068	FBgn0030536	0.821575	1.40106	0.116771	-0.538818	-2.16584	-1.35233	#N/A	#N/A	#N/A	#N/A	#N/A	#N/A
CG7387	FBgn0035852	0.875195	1.65448	0.617245	-0.424884	-2.1749	-1.29989	#N/A	#N/A	#N/A	#N/A	#N/A	#N/A
Trf4-2	FBgn0039251	0.454375	1.0455	-0.139595	-0.263932	-2.17916	-1.22155	#N/A	#N/A	#N/A	#N/A	#N/A	#N/A
CG7140	FBgn0037147	0.592073	1.42289	-1.29074	-0.241317	-2.19489	-1.21811	#N/A	#N/A	#N/A	#N/A	#N/A	#N/A
Fer3HCH	FBgn0030449	0.796194	1.03159	-0.714903	-0.596022	-2.19778	-1.3969	#N/A	#N/A	#N/A	#N/A	#N/A	#N/A
CG43069	FBgn0262479	0.586029	1.38742	-0.119167	-0.568206	-2.20462	-1.38641	#N/A	#N/A	#N/A	#N/A	#N/A	#N/A
CG14294	FBgn0038656	0.413418	1.12916	-0.861493	-0.355607	-2.22083	-1.28822	#N/A	#N/A	#N/A	#N/A	#N/A	#N/A
CG17118	FBgn0032291	0.532641	1.27118	-0.770005	-0.472617	-2.22355	-1.34808	#N/A	#N/A	#N/A	#N/A	#N/A	#N/A
sip2	FBgn0031878	0.990102	1.77015	-0.389504	-0.287249	-2.23259	-1.25992	#N/A	#N/A	#N/A	#N/A	#N/A	#N/A
CG7202	FBgn0037086	0.867754	1.58329	-0.783383	-0.53558	-2.24693	-1.39126	#N/A	#N/A	#N/A	#N/A	#N/A	#N/A
CG42703	FBgn0261614	0.208642	1.01672	-1.07424	-0.124789	-2.26166	-1.19323	#N/A	#N/A	#N/A	#N/A	#N/A	#N/A
CG14579	FBgn0031163	0.380527	1.39059	-1.22566	-0.506027	-2.26798	-1.387	#N/A	#N/A	#N/A	#N/A	#N/A	#N/A
CkIIbeta2	FBgn0026136	0.581606	1.12957	-0.720382	-0.340038	-2.27488	-1.30746	#N/A	#N/A	#N/A	#N/A	#N/A	#N/A
CG7669	FBgn0038607	0.7654	1.7629	-0.385356	-0.320159	-2.27645	-1.2983	#N/A	#N/A	#N/A	#N/A	#N/A	#N/A
Tengl1	FBgn0051682	0.45124	1.25218	-0.572093	-0.62625	-2.27769	-1.45197	#N/A	#N/A	#N/A	#N/A	#N/A	#N/A
CG10510	FBgn0037059	0.557201	1.1913	-0.498297	-0.55782	-2.27901	-1.41842	#N/A	#N/A	#N/A	#N/A	#N/A	#N/A
CG31988	FBgn0051988	0.901888	1.99033	-1.78297	-0.0715756	-2.28509	-1.17833	#N/A	#N/A	#N/A	#N/A	#N/A	#N/A
CG7335	FBgn0036941	0.378317	1.10989	-0.379826	-0.0931196	-2.28632	-1.18972	#N/A	#N/A	#N/A	#N/A	#N/A	#N/A
CG42810	FBgn0261992	0.822649	1.37297	-0.981461	-0.444808	-2.28685	-1.36583	#N/A	#N/A	#N/A	#N/A	#N/A	#N/A
CG43089	FBgn0262535	0.392445	1.15728	-0.944382	-0.181228	-2.29126	-1.23624	#N/A	#N/A	#N/A	#N/A	#N/A	#N/A
CG42758	FBgn0261816	0.461109	1.46234	-0.975181	-0.0284952	-2.31506	-1.17178	#N/A	#N/A	#N/A	#N/A	#N/A	#N/A
CG14488	FBgn0034278	0.86635	1.74893	-0.952172	-0.409092	-2.31877	-1.36393	#N/A	#N/A	#N/A	#N/A	#N/A	#N/A
CG17564	FBgn0032768	0.726864	1.48291	-2.11515	-0.483172	-2.36682	-1.425	#N/A	#N/A	#N/A	#N/A	#N/A	#N/A
CG1138	FBgn0037456	0.414895	1.04475	-1.19159	-0.433834	-2.36835	-1.40109	#N/A	#N/A	#N/A	#N/A	#N/A	#N/A
CG31468	FBgn0047351	0.83619	1.67988	-0.745384	0.0963717	-2.38171	-1.14267	#N/A	#N/A	#N/A	#N/A	#N/A	#N/A
CR43142	FBgn0262616	0.894333	1.12247	-0.521412	-0.660842	-2.38236	-1.5216	#N/A	#N/A	#N/A	#N/A	#N/A	#N/A
CG43059	FBgn0262361	0.964594	1.26949	1.29109	-0.675311	-2.38505	-1.53018	#N/A	#N/A	#N/A	#N/A	#N/A	#N/A
CG13244	FBgn0032577	0.701289	1.35197	-1.04742	-0.664391	-2.3906	-1.5275	#N/A	#N/A	#N/A	#N/A	#N/A	#N/A
CG30065	FBgn0050065	0.723219	1.44454	0.578121	-0.891447	-2.40129	-1.64637	#N/A	#N/A	#N/A	#N/A	#N/A	#N/A
CG1324	FBgn0031129	0.951474	1.88318	-2.34022	-0.1876	-2.41511	-1.30135	#N/A	#N/A	#N/A	#N/A	#N/A	#N/A
klhl10	FBgn0040038	0.385002	1.21034	-0.249961	-0.213355	-2.41973	-1.31654	#N/A	#N/A	#N/A	#N/A	#N/A	#N/A
CG7886	FBgn0038248	0.181727	1.15193	-0.219062	-0.40912	-2.41979	-1.41445	#N/A	#N/A	#N/A	#N/A	#N/A	#N/A
CG17030	FBgn0035584	0.240018	1.34847	-1.68636	-0.0664684	-2.42166	-1.24406	#N/A	#N/A	#N/A	#N/A	#N/A	#N/A
CG15498	FBgn0038892	0.250287	1.02763	-0.922167	-0.225081	-2.42899	-1.32703	#N/A	#N/A	#N/A	#N/A	#N/A	#N/A
CG42288	FBgn0259184	0.743497	1.57082	-1.57863	-0.349772	-2.42975	-1.38976	#N/A	#N/A	#N/A	#N/A	#N/A	#N/A
CG17300	FBgn0036345	0.543687	1.20945	-1.98853	-0.12446	-2.43065	-1.27756	#N/A	#N/A	#N/A	#N/A	#N/A	#N/A
CG5155	FBgn0031905	0.669251	1.24582	-0.0885108	-0.632444	-2.43155	-1.53199	#N/A	#N/A	#N/A	#N/A	#N/A	#N/A
CG13471	FBgn0036443	0.473752	1.37641	-0.327019	-0.209114	-2.4337	-1.32141	#N/A	#N/A	#N/A	#N/A	#N/A	#N/A
CG15403	FBgn0031504	0.703099	1.38174	-0.608023	-0.511862	-2.43917	-1.47552	#N/A	#N/A	#N/A	#N/A	#N/A	#N/A
CG11697	FBgn0030313	0.681441	1.13526	-0.919106	-0.614648	-2.44301	-1.52883	#N/A	#N/A	#N/A	#N/A	#N/A	#N/A
Mst89B	FBgn0020399	0.782885	1.29795	-0.282735	-0.290077	-2.44617	-1.36813	#N/A	#N/A	#N/A	#N/A	#N/A	#N/A
CG11291	FBgn0034713	0.418076	1.14605	-1.05466	-0.371721	-2.45071	-1.41122	#N/A	#N/A	#N/A	#N/A	#N/A	#N/A
CG34222	FBgn0250822	0.454767	1.06389	-1.88687	-0.22096	-2.45101	-1.33598	#N/A	#N/A	#N/A	#N/A	#N/A	#N/A
CG42523	FBgn0260428	0.961719	1.74052	-2.05073	-0.451462	-2.45596	-1.45371	#N/A	#N/A	#N/A	#N/A	#N/A	#N/A
CG14448	FBgn0037191	0.980511	1.55368	-1.03942	-0.4458	-2.45642	-1.45111	#N/A	#N/A	#N/A	#N/A	#N/A	#N/A
robl37BC	FBgn0028569	0.754227	1.27097	-0.441921	-0.507485	-2.46065	-1.48407	#N/A	#N/A	#N/A	#N/A	#N/A	#N/A
CG42556	FBgn0260758	0.771257	1.68956	-0.658275	-0.585075	-2.4612	-1.52313	#N/A	#N/A	#N/A	#N/A	#N/A	#N/A
CG14128	FBgn0036218	0.896585	1.61638	-0.767724	-0.767426	-2.46485	-1.61614	#N/A	#N/A	#N/A	#N/A	#N/A	#N/A
CG31921	FBgn0051921	0.7588	1.58299	-1.18699	-0.151593	-2.4698	-1.3107	#N/A	#N/A	#N/A	#N/A	#N/A	#N/A
CG17991	FBgn0039498	0.845493	1.5069	-0.658962	-0.276447	-2.47038	-1.37341	#N/A	#N/A	#N/A	#N/A	#N/A	#N/A
CG6036	FBgn0039421	0.719861	1.19517	-1.15971	-0.539305	-2.47421	-1.50676	#N/A	#N/A	#N/A	#N/A	#N/A	#N/A
CG12617	FBgn0040996	0.764505	1.56223	-2.89334	-0.264496	-2.48128	-1.37289	#N/A	#N/A	#N/A	#N/A	#N/A	#N/A
CG14282	FBgn0038685	0.528808	1.25443	-0.891344	-0.420218	-2.48189	-1.45106	#N/A	#N/A	#N/A	#N/A	#N/A	#N/A
CG3121	FBgn0034957	0.577174	1.21442	-0.610266	-0.323513	-2.48863	-1.40607	#N/A	#N/A	#N/A	#N/A	#N/A	#N/A
CG9129	FBgn0035196	0.98057	1.80206	-2.17703	-0.0636689	-2.50041	-1.28204	#N/A	#N/A	#N/A	#N/A	#N/A	#N/A
CG5398	FBgn0034882	0.548616	1.56776	-1.33358	0.0185272	-2.50881	-1.24514	#N/A	#N/A	#N/A	#N/A	#N/A	#N/A
CG13168	FBgn0033705	0.836236	1.72806	-1.23429	-0.382234	-2.51299	-1.44761	#N/A	#N/A	#N/A	#N/A	#N/A	#N/A
CG9392	FBgn0036895	0.594722	1.36533	-0.820039	-0.189617	-2.52259	-1.3561	#N/A	#N/A	#N/A	#N/A	#N/A	#N/A
CG15452	FBgn0031130	0.693586	1.14582	-0.526963	-0.963503	-2.52861	-1.74606	#N/A	#N/A	#N/A	#N/A	#N/A	#N/A
CG14926	FBgn0032360	0.953561	1.96901	-2.65447	-0.0231215	-2.53459	-1.27885	#N/A	#N/A	#N/A	#N/A	#N/A	#N/A
CG42650	FBgn0261502	0.53456	1.26054	-1.22733	-0.248792	-2.54601	-1.3974	#N/A	#N/A	#N/A	#N/A	#N/A	#N/A
CG3687	FBgn0034097	0.692441	1.27999	-1.01304	-0.528099	-2.54637	-1.53723	#N/A	#N/A	#N/A	#N/A	#N/A	#N/A
SIP3	FBgn0061196	0.479983	1.05351	-0.355336	-0.194251	-2.548	-1.37112	#N/A	#N/A	#N/A	#N/A	#N/A	#N/A
CG4438	FBgn0032115	0.357654	1.38051	-1.53216	-0.765073	-2.55873	-1.6619	#N/A	#N/A	#N/A	#N/A	#N/A	#N/A
CG31391	FBgn0051391	0.751208	1.54686	-0.353159	-0.30577	-2.5694	-1.43758	#N/A	#N/A	#N/A	#N/A	#N/A	#N/A
CG9550	FBgn0031826	0.701792	1.49934	-1.45379	-0.354029	-2.57023	-1.46213	#N/A	#N/A	#N/A	#N/A	#N/A	#N/A
CG32119	FBgn0052119	0.911369	1.66236	-1.55795	-0.23863	-2.57147	-1.40505	#N/A	#N/A	#N/A	#N/A	#N/A	#N/A
CG32459	FBgn0052459	0.883203	1.66342	-0.604196	-0.216648	-2.57158	-1.39412	#N/A	#N/A	#N/A	#N/A	#N/A	#N/A
CG33060	FBgn0053060	0.927903	1.42602	-1.26466	-0.729886	-2.57976	-1.65483	#N/A	#N/A	#N/A	#N/A	#N/A	#N/A
CG13693	FBgn0031235	0.518325	1.23113	0.722347	-0.517007	-2.58504	-1.55102	#N/A	#N/A	#N/A	#N/A	#N/A	#N/A
CG5043	FBgn0032636	0.532185	1.70036	-0.282211	-0.466658	-2.5871	-1.52688	#N/A	#N/A	#N/A	#N/A	#N/A	#N/A
CG30324	FBgn0050324	0.962901	1.86113	-1.61963	-0.107571	-2.59055	-1.34906	#N/A	#N/A	#N/A	#N/A	#N/A	#N/A
CG42848	FBgn0262095	0.606789	1.40408	-1.94547	-0.260089	-2.59231	-1.4262	#N/A	#N/A	#N/A	#N/A	#N/A	#N/A
CG11379	FBgn0040362	0.352051	1.11665	-1.51249	0.0776978	-2.59301	-1.25766	#N/A	#N/A	#N/A	#N/A	#N/A	#N/A
ttm2	FBgn0035124	0.528218	1.34235	-0.923853	-0.0715055	-2.60349	-1.3375	#DIV/0!	#DIV/0!	#DIV/0!	#DIV/0!	#DIV/0!	#DIV/0!
CG34173	FBgn0085202	0.798607	1.23055	-0.872252	-0.406763	-2.61652	-1.51164	#N/A	#N/A	#N/A	#N/A	#N/A	#N/A
CG15198	FBgn0030283	0.868692	1.71058	-2.44933	-0.0528413	-2.62034	-1.33659	#N/A	#N/A	#N/A	#N/A	#N/A	#N/A
CG43101	FBgn0262547	-0.437469	1.3657	-1.49145	0.94385	-2.63834	-0.847242	#N/A	#N/A	#N/A	#N/A	#N/A	#N/A
CG4714	FBgn0033819	0.391194	1.17401	-0.302298	-0.0978318	-2.64123	-1.36953	#N/A	#N/A	#N/A	#N/A	#N/A	#N/A
CG17375	FBgn0031861	0.727743	1.40891	-0.89167	-0.552405	-2.64734	-1.59987	#N/A	#N/A	#N/A	#N/A	#N/A	#N/A
CG3942	FBgn0038008	0.474815	1.01408	0.178899	-0.315328	-2.6484	-1.48186	#N/A	#N/A	#N/A	#N/A	#N/A	#N/A
CG42448	FBgn0259922	0.560976	1.20314	-0.808018	-0.749967	-2.6488	-1.69939	#N/A	#N/A	#N/A	#N/A	#N/A	#N/A
whip	FBgn0250827	0.521156	1.51259	-1.64991	-0.280388	-2.64928	-1.46483	#N/A	#N/A	#N/A	#N/A	#N/A	#N/A
CG34021	FBgn0054021	0.65648	1.18215	-0.330884	-0.371312	-2.65424	-1.51277	#N/A	#N/A	#N/A	#N/A	#N/A	#N/A
CG43108	FBgn0262568	0.811573	1.13529	-0.693779	-0.695506	-2.66502	-1.68026	#N/A	#N/A	#N/A	#N/A	#N/A	#N/A
CG5139	FBgn0031323	0.864377	1.86183	-0.650514	-0.275764	-2.66657	-1.47117	#N/A	#N/A	#N/A	#N/A	#N/A	#N/A
CG1287	FBgn0037506	0.874507	1.70765	-0.562834	-0.0358841	-2.66984	-1.35286	#N/A	#N/A	#N/A	#N/A	#N/A	#N/A
CG1958	FBgn0029940	0.857231	1.58432	-1.84256	-0.294426	-2.67649	-1.48546	#N/A	#N/A	#N/A	#N/A	#N/A	#N/A
CG12376	FBgn0033323	0.498141	1.0722	-1.01329	-0.476723	-2.67996	-1.57834	#N/A	#N/A	#N/A	#N/A	#N/A	#N/A
CG14717	FBgn0037938	0.745796	1.16924	-1.07348	-0.643878	-2.69071	-1.6673	#N/A	#N/A	#N/A	#N/A	#N/A	#N/A
ACXC	FBgn0040508	0.431443	1.04096	-1.13588	-0.396938	-2.70013	-1.54853	#N/A	#N/A	#N/A	#N/A	#N/A	#N/A
robl22E	FBgn0028570	0.323252	1.40375	-0.315443	0.226599	-2.70365	-1.23853	#N/A	#N/A	#N/A	#N/A	#N/A	#N/A
CG17083	FBgn0039070	0.885628	1.63282	-1.29876	-0.362936	-2.70689	-1.53491	#N/A	#N/A	#N/A	#N/A	#N/A	#N/A
CG33664	FBgn0053664	0.356929	1.08523	-1.1636	-0.320492	-2.71251	-1.5165	#N/A	#N/A	#N/A	#N/A	#N/A	#N/A
CG11404	FBgn0037169	0.796783	1.5811	0.186422	-0.838955	-2.72676	-1.78286	#N/A	#N/A	#N/A	#N/A	#N/A	#N/A
CG11726	FBgn0036156	0.684234	1.10122	-0.126753	-0.574061	-2.72995	-1.65201	#N/A	#N/A	#N/A	#N/A	#N/A	#N/A
CG13008	FBgn0030780	0.387752	1.09296	-1.51834	-0.359905	-2.73054	-1.54522	#N/A	#N/A	#N/A	#N/A	#N/A	#N/A
CG30487	FBgn0050487	0.981996	1.58922	-1.25051	-0.22694	-2.73111	-1.47902	#N/A	#N/A	#N/A	#N/A	#N/A	#N/A
boly	FBgn0050362	0.727107	1.82675	-2.03939	-0.378907	-2.73223	-1.55557	#N/A	#N/A	#N/A	#N/A	#N/A	#N/A
CG42657	FBgn0261522	0.942749	1.82337	-1.1602	-0.512165	-2.73742	-1.62479	#N/A	#N/A	#N/A	#N/A	#N/A	#N/A
CG13991	FBgn0031785	0.330092	1.02951	-1.92998	-0.00448563	-2.74071	-1.3726	#N/A	#N/A	#N/A	#N/A	#N/A	#N/A
CG3222	FBgn0036014	0.965498	1.81813	-0.892371	-0.30054	-2.74395	-1.52224	#N/A	#N/A	#N/A	#N/A	#N/A	#N/A
CG9861	FBgn0034844	0.853895	1.87866	-1.07035	-0.0841949	-2.74687	-1.41553	#N/A	#N/A	#N/A	#N/A	#N/A	#N/A
CG33322	FBgn0053322	0.355381	1.47303	-1.65933	-0.151646	-2.75347	-1.45256	#N/A	#N/A	#N/A	#N/A	#N/A	#N/A
CG6790	FBgn0037915	0.856953	1.69174	-0.622443	-0.682014	-2.75387	-1.71794	#N/A	#N/A	#N/A	#N/A	#N/A	#N/A
CG6485	FBgn0036706	0.651071	1.251	-1.65579	-0.60956	-2.76051	-1.68503	#N/A	#N/A	#N/A	#N/A	#N/A	#N/A
h-cup	FBgn0038334	0.71439	1.55606	-1.01868	-0.382631	-2.76242	-1.57252	#N/A	#N/A	#N/A	#N/A	#N/A	#N/A
CG1722	FBgn0031168	0.505038	1.10979	-0.458478	-0.465709	-2.76253	-1.61412	#N/A	#N/A	#N/A	#N/A	#N/A	#N/A
CG8138	FBgn0038122	0.70498	1.47054	-0.738723	-0.452591	-2.76324	-1.60791	#N/A	#N/A	#N/A	#N/A	#N/A	#N/A
CG31913	FBgn0051913	0.742672	1.48847	-1.37262	-0.13694	-2.77029	-1.45361	#N/A	#N/A	#N/A	#N/A	#N/A	#N/A
CG42752	FBgn0261806	0.530074	1.01245	-0.570366	-0.47916	-2.77057	-1.62487	#N/A	#N/A	#N/A	#N/A	#N/A	#N/A
CG8746	FBgn0033330	0.898133	1.6671	-3.17948	-0.130705	-2.7787	-1.4547	#N/A	#N/A	#N/A	#N/A	#N/A	#N/A
CG2574	FBgn0030386	0.440478	1.10482	-2.21846	-0.31902	-2.78122	-1.55012	#N/A	#N/A	#N/A	#N/A	#N/A	#N/A
CG13539	FBgn0034833	0.667364	1.27018	-1.10835	-0.261919	-2.78179	-1.52185	#N/A	#N/A	#N/A	#N/A	#N/A	#N/A
Tengl4	FBgn0037857	0.359254	1.11309	-1.10818	-0.0248741	-2.78562	-1.40525	#N/A	#N/A	#N/A	#N/A	#N/A	#N/A
CG13032	FBgn0036652	0.63651	1.55111	-0.359481	-0.333617	-2.78793	-1.56077	#N/A	#N/A	#N/A	#N/A	#N/A	#N/A
CG4712	FBgn0033818	0.557938	1.47082	-0.835625	-0.382906	-2.78827	-1.58559	#N/A	#N/A	#N/A	#N/A	#N/A	#N/A
RpL10Aa	FBgn0038281	0.918974	1.84098	-1.20411	-0.104492	-2.78884	-1.44667	#N/A	#N/A	#N/A	#N/A	#N/A	#N/A
I-t	FBgn0025821	0.516061	1.21041	0.0933671	-0.35186	-2.79223	-1.57205	#N/A	#N/A	#N/A	#N/A	#N/A	#N/A
CG5561	FBgn0031333	0.885097	1.26792	-1.32902	-0.798812	-2.79439	-1.7966	#N/A	#N/A	#N/A	#N/A	#N/A	#N/A
CG14316	FBgn0038567	0.552161	1.45316	-0.128202	-0.273869	-2.79816	-1.53602	#N/A	#N/A	#N/A	#N/A	#N/A	#N/A
CG14013	FBgn0031720	0.372838	1.17888	-1.12267	-0.147821	-2.79952	-1.47367	#N/A	#N/A	#N/A	#N/A	#N/A	#N/A
CG13989	FBgn0031786	0.814827	1.39203	-1.99238	-0.451816	-2.80003	-1.62592	#N/A	#N/A	#N/A	#N/A	#N/A	#N/A
CG1988	FBgn0037464	0.645871	1.66259	-1.02413	-0.190589	-2.80115	-1.49587	#N/A	#N/A	#N/A	#N/A	#N/A	#N/A
CG33704	FBgn0053704	0.61806	1.26666	-0.738891	-0.432041	-2.80416	-1.6181	#N/A	#N/A	#N/A	#N/A	#N/A	#N/A
CG9222	FBgn0031784	0.810959	1.59279	-1.46481	-0.157751	-2.8048	-1.48128	#N/A	#N/A	#N/A	#N/A	#N/A	#N/A
CG15208	FBgn0030247	0.981384	1.87438	-1.11394	-0.342145	-2.80568	-1.57391	#N/A	#N/A	#N/A	#N/A	#N/A	#N/A
CG16957	FBgn0032519	0.995193	1.70479	-2.63847	-0.230243	-2.80573	-1.51799	#N/A	#N/A	#N/A	#N/A	#N/A	#N/A
CG3306	FBgn0036016	0.664602	1.46949	-1.35533	-0.332693	-2.80748	-1.57008	#N/A	#N/A	#N/A	#N/A	#N/A	#N/A
CG31099	FBgn0051099	0.604928	1.20026	-0.833368	-0.305425	-2.81161	-1.55852	#N/A	#N/A	#N/A	#N/A	#N/A	#N/A
CG14355	FBgn0038208	0.987635	2.06299	-2.44358	-0.116939	-2.81405	-1.46549	#N/A	#N/A	#N/A	#N/A	#N/A	#N/A
CG13544	FBgn0034826	0.701321	1.48177	-2.33016	-0.534267	-2.81746	-1.67586	#N/A	#N/A	#N/A	#N/A	#N/A	#N/A
CG42529	FBgn0260434	0.616126	1.40715	-2.49503	-0.00697076	-2.81897	-1.41297	#N/A	#N/A	#N/A	#N/A	#N/A	#N/A
CG12448	FBgn0028857	0.757857	1.40493	-1.85947	-0.578335	-2.83334	-1.70584	#N/A	#N/A	#N/A	#N/A	#N/A	#N/A
CG43750	FBgn0264081	0.802469	1.44835	-1.16467	-0.560655	-2.84267	-1.70166	#N/A	#N/A	#N/A	#N/A	#N/A	#N/A
CG10750	FBgn0032769	0.57482	1.3012	-0.840935	-0.669982	-2.84893	-1.75946	#N/A	#N/A	#N/A	#N/A	#N/A	#N/A
CG8750	FBgn0040812	0.963591	1.50777	-1.47774	-0.167159	-2.8559	-1.51153	#N/A	#N/A	#N/A	#N/A	#N/A	#N/A
Cht12	FBgn0050293	0.837561	1.63745	-0.135699	-0.050115	-2.8635	-1.45681	#N/A	#N/A	#N/A	#N/A	#N/A	#N/A
CG15483	FBgn0032457	0.64956	1.0029	-0.223596	-0.17287	-2.86516	-1.51902	#N/A	#N/A	#N/A	#N/A	#N/A	#N/A
CG31482	FBgn0051482	0.811915	1.54476	-2.32801	-0.324002	-2.86594	-1.59497	#N/A	#N/A	#N/A	#N/A	#N/A	#N/A
CG1690	FBgn0033442	0.846571	1.75279	-1.17623	-0.379703	-2.86687	-1.62328	#N/A	#N/A	#N/A	#N/A	#N/A	#N/A
CG31231	FBgn0051231	0.377285	1.03292	-0.118534	-0.169431	-2.86705	-1.51824	#N/A	#N/A	#N/A	#N/A	#N/A	#N/A
CG7707	FBgn0036703	0.531269	1.37922	-0.839641	-0.462497	-2.86801	-1.66526	#N/A	#N/A	#N/A	#N/A	#N/A	#N/A
Pif2	FBgn0046873	0.42913	1.47347	-1.35551	-0.434924	-2.86815	-1.65154	#N/A	#N/A	#N/A	#N/A	#N/A	#N/A
CG31275	FBgn0063261	0.999101	1.77083	-1.84859	-0.551463	-2.86872	-1.71009	#N/A	#N/A	#N/A	#N/A	#N/A	#N/A
CG11249	FBgn0037115	0.403804	1.05424	-0.941623	-0.231118	-2.8732	-1.55216	#N/A	#N/A	#N/A	#N/A	#N/A	#N/A
CG7211	FBgn0031941	0.892027	1.57538	0.176022	-0.124444	-2.8749	-1.49967	#N/A	#N/A	#N/A	#N/A	#N/A	#N/A
CG30270	FBgn0061435	0.705414	1.38107	-1.62471	-0.57428	-2.8775	-1.72589	#N/A	#N/A	#N/A	#N/A	#N/A	#N/A
CG11165	FBgn0033238	0.533709	1.21119	-0.232926	0.0167262	-2.88049	-1.43188	#N/A	#N/A	#N/A	#N/A	#N/A	#N/A
CG15128	FBgn0034467	0.935741	1.88251	-1.19569	-0.266137	-2.8814	-1.57377	#N/A	#N/A	#N/A	#N/A	#N/A	#N/A
CG2750	FBgn0030376	0.413174	1.0292	-0.556421	-0.243164	-2.88238	-1.56277	#N/A	#N/A	#N/A	#N/A	#N/A	#N/A
CG31819	FBgn0028893	0.534326	1.26721	-1.44048	-0.2955	-2.88884	-1.59217	#N/A	#N/A	#N/A	#N/A	#N/A	#N/A
CG32161	FBgn0052161	0.802004	1.69786	-0.844661	-0.249662	-2.89121	-1.57044	#N/A	#N/A	#N/A	#N/A	#N/A	#N/A
Gld2	FBgn0038934	0.604505	1.39264	0.143854	-0.467739	-2.89383	-1.68078	#N/A	#N/A	#N/A	#N/A	#N/A	#N/A
CG16741	FBgn0042198	0.873446	1.19277	-1.20081	-0.560666	-2.89499	-1.72783	#N/A	#N/A	#N/A	#N/A	#N/A	#N/A
CG43321	FBgn0263026	0.409736	1.50055	-0.896074	0.111044	-2.89762	-1.39329	#N/A	#N/A	#N/A	#N/A	#N/A	#N/A
CG8349	FBgn0032003	0.578724	1.41382	-0.84285	-0.523486	-2.8979	-1.71069	#N/A	#N/A	#N/A	#N/A	#N/A	#N/A
CG8838	FBgn0031526	0.845368	1.7772	-0.249974	-0.430032	-2.90375	-1.66689	#N/A	#N/A	#N/A	#N/A	#N/A	#N/A
CG13186	FBgn0033680	0.530612	1.09491	-1.88344	0.249016	-2.90394	-1.32746	#N/A	#N/A	#N/A	#N/A	#N/A	#N/A
CG42847	FBgn0262036	0.933574	1.59572	-2.47345	-0.27097	-2.90395	-1.58746	#N/A	#N/A	#N/A	#N/A	#N/A	#N/A
CG32450	FBgn0052450	0.935479	1.85028	-2.39944	-0.190827	-2.90823	-1.54953	#N/A	#N/A	#N/A	#N/A	#N/A	#N/A
CG3565	FBgn0035034	0.9667	1.48682	-1.46535	-0.602547	-2.91379	-1.75817	#N/A	#N/A	#N/A	#N/A	#N/A	#N/A
Klp59D	FBgn0034827	0.656448	1.63512	-1.76598	-0.377849	-2.91833	-1.64809	#N/A	#N/A	#N/A	#N/A	#N/A	#N/A
CG15475	FBgn0032867	0.952288	1.86322	-1.39319	-0.0973779	-2.92045	-1.50891	#N/A	#N/A	#N/A	#N/A	#N/A	#N/A
CG15705	FBgn0034104	0.607099	1.18276	-1.55381	-0.705462	-2.92308	-1.81427	#N/A	#N/A	#N/A	#N/A	#N/A	#N/A
CG3610	FBgn0038266	0.501727	1.36559	-2.107	-0.427582	-2.92432	-1.67595	#N/A	#N/A	#N/A	#N/A	#N/A	#N/A
CG17666	FBgn0036311	0.703247	1.63804	-0.838537	-0.0491124	-2.92473	-1.48692	#N/A	#N/A	#N/A	#N/A	#N/A	#N/A
CG12020	FBgn0035273	0.514923	1.05612	-0.565458	-0.239863	-2.92867	-1.58427	#N/A	#N/A	#N/A	#N/A	#N/A	#N/A
Pka-C2	FBgn0000274	0.42186	1.06309	-0.424195	-0.374454	-2.93008	-1.65227	#N/A	#N/A	#N/A	#N/A	#N/A	#N/A
CG32713	FBgn0052713	0.76963	1.46188	-0.385024	-0.363057	-2.93316	-1.64811	#N/A	#N/A	#N/A	#N/A	#N/A	#N/A
CG10822	FBgn0034478	0.723821	1.47507	-0.58913	-0.295421	-2.93444	-1.61493	#N/A	#N/A	#N/A	#N/A	#N/A	#N/A
CG17154	FBgn0036246	0.654914	1.16881	-1.15459	-0.442248	-2.93471	-1.68848	#N/A	#N/A	#N/A	#N/A	#N/A	#N/A
CG7311	FBgn0028848	0.676402	1.72787	-2.00209	-0.0695639	-2.93788	-1.50372	#N/A	#N/A	#N/A	#N/A	#N/A	#N/A
CG15124	FBgn0034461	0.843958	1.49846	-2.59785	-0.573876	-2.94405	-1.75896	#N/A	#N/A	#N/A	#N/A	#N/A	#N/A
CG10841	FBgn0038163	0.995304	1.8805	-0.979729	-0.259554	-2.94959	-1.60457	#N/A	#N/A	#N/A	#N/A	#N/A	#N/A
CG9570	FBgn0031085	0.845993	1.76682	-2.79133	-0.266257	-2.95121	-1.60874	#N/A	#N/A	#N/A	#N/A	#N/A	#N/A
CG9014	FBgn0028847	0.838091	1.69832	-2.01442	-0.185062	-2.96983	-1.57745	#N/A	#N/A	#N/A	#N/A	#N/A	#N/A
CG31244	FBgn0051244	0.575391	1.46207	-1.84756	-0.321555	-2.97404	-1.6478	#N/A	#N/A	#N/A	#N/A	#N/A	#N/A
Vha36-2	FBgn0033706	0.429446	1.11309	-1.23327	-0.165311	-2.97409	-1.5697	#N/A	#N/A	#N/A	#N/A	#N/A	#N/A
CG12693	FBgn0029705	0.42606	1.06774	-0.353304	-0.175229	-2.97569	-1.57546	#N/A	#N/A	#N/A	#N/A	#N/A	#N/A
CG14668	FBgn0037320	0.603976	1.22394	-1.68985	-0.498708	-2.97743	-1.73807	#N/A	#N/A	#N/A	#N/A	#N/A	#N/A
Dic2	FBgn0038797	0.81844	1.85856	-2.99566	-0.319859	-2.97991	-1.64988	#N/A	#N/A	#N/A	#N/A	#N/A	#N/A
CG13405	FBgn0035097	0.811117	1.28262	-1.68247	-0.778615	-2.98	-1.87931	#N/A	#N/A	#N/A	#N/A	#N/A	#N/A
CG17944	FBgn0037500	0.774932	1.64153	-2.79674	-0.216299	-2.98091	-1.59861	#N/A	#N/A	#N/A	#N/A	#N/A	#N/A
CG31952	FBgn0051952	0.813029	1.35634	-2.81937	-0.414383	-2.98225	-1.69831	#N/A	#N/A	#N/A	#N/A	#N/A	#N/A
CG34292	FBgn0085321	0.560925	1.42698	-1.97119	-0.35583	-2.98657	-1.6712	#N/A	#N/A	#N/A	#N/A	#N/A	#N/A
Rpn12R	FBgn0036465	0.805676	1.41293	-0.454957	-0.690541	-2.98851	-1.83952	#N/A	#N/A	#N/A	#N/A	#N/A	#N/A
CG34210	FBgn0085239	0.429208	1.02951	-1.84475	-0.200947	-2.99081	-1.59588	#N/A	#N/A	#N/A	#N/A	#N/A	#N/A
CG8476	FBgn0038127	0.854566	1.48414	-1.55345	-0.499005	-2.99229	-1.74565	#N/A	#N/A	#N/A	#N/A	#N/A	#N/A
CG7813	FBgn0034133	0.9047	2.02441	-0.660156	-0.488438	-2.99854	-1.74349	#N/A	#N/A	#N/A	#N/A	#N/A	#N/A
CG15708	FBgn0034099	0.430463	1.21411	-2.06457	-0.209981	-2.99948	-1.60473	#N/A	#N/A	#N/A	#N/A	#N/A	#N/A
CG4520	FBgn0038355	0.782461	1.55774	-1.89259	-0.694933	-3.00029	-1.84761	#N/A	#N/A	#N/A	#N/A	#N/A	#N/A
CG15577	FBgn0040904	0.722986	1.39414	-1.07221	-0.387079	-3.00121	-1.69415	#N/A	#N/A	#N/A	#N/A	#N/A	#N/A
CG14891	FBgn0038445	0.49575	1.05112	-1.09287	-0.341022	-3.0093	-1.67516	#N/A	#N/A	#N/A	#N/A	#N/A	#N/A
CG17098	FBgn0032276	0.728571	1.78927	-1.61979	-0.324689	-3.0162	-1.67044	#N/A	#N/A	#N/A	#N/A	#N/A	#N/A
CG1137	FBgn0037454	0.79715	1.75969	-1.59152	-0.334315	-3.01643	-1.67537	#N/A	#N/A	#N/A	#N/A	#N/A	#N/A
CG10920	FBgn0029963	0.38633	1.03398	-2.02653	-0.37313	-3.02162	-1.69738	#N/A	#N/A	#N/A	#N/A	#N/A	#N/A
CG31055	FBgn0051055	0.485823	1.12231	-1.9166	-0.528002	-3.02553	-1.77677	#N/A	#N/A	#N/A	#N/A	#N/A	#N/A
CG3581	FBgn0038697	0.801532	1.8157	-2.55884	-0.313992	-3.0303	-1.67215	#N/A	#N/A	#N/A	#N/A	#N/A	#N/A
hubl	FBgn0050364	0.379163	1.00461	0.398189	-0.207248	-3.04478	-1.62602	#N/A	#N/A	#N/A	#N/A	#N/A	#N/A
CG8508	FBgn0038123	0.801466	1.51421	-0.550358	-0.534561	-3.05237	-1.79347	#N/A	#N/A	#N/A	#N/A	#N/A	#N/A
CG43183	FBgn0262812	0.738067	1.26932	-1.04164	-0.947773	-3.05759	-2.00268	#N/A	#N/A	#N/A	#N/A	#N/A	#N/A
CG13473	FBgn0036442	0.577966	1.20151	-0.845376	-0.183915	-3.05772	-1.62082	#N/A	#N/A	#N/A	#N/A	#N/A	#N/A
CG4955	FBgn0030814	0.586608	1.0893	-1.12385	-0.189162	-3.06078	-1.62497	#N/A	#N/A	#N/A	#N/A	#N/A	#N/A
CG33017	FBgn0053017	0.267591	1.19219	-1.13293	0.0527069	-3.06391	-1.5056	#N/A	#N/A	#N/A	#N/A	#N/A	#N/A
CG17744	FBgn0035730	0.871324	1.66474	-1.36263	-0.777743	-3.07002	-1.92388	#N/A	#N/A	#N/A	#N/A	#N/A	#N/A
CR32835	FBgn0052835	0.587647	1.4211	-1.82171	-0.839835	-3.07462	-1.95723	#N/A	#N/A	#N/A	#N/A	#N/A	#N/A
CG33669	FBgn0053669	0.450856	1.25557	-1.22958	-0.281228	-3.07864	-1.67993	#N/A	#N/A	#N/A	#N/A	#N/A	#N/A
CG8065	FBgn0036075	0.961926	1.74681	-1.28247	-0.783257	-3.08011	-1.93168	#N/A	#N/A	#N/A	#N/A	#N/A	#N/A
skpF	FBgn0034863	0.915456	1.68695	-0.891557	-0.234373	-3.09773	-1.66605	#N/A	#N/A	#N/A	#N/A	#N/A	#N/A
CG2964	FBgn0031462	0.492216	1.16217	-0.593899	-0.166854	-3.10157	-1.63421	#N/A	#N/A	#N/A	#N/A	#N/A	#N/A
CG32437	FBgn0052437	0.730203	1.63586	-1.55299	-0.080083	-3.10755	-1.59381	#N/A	#N/A	#N/A	#N/A	#N/A	#N/A
CG5565	FBgn0031335	0.957175	1.85012	0.141245	-0.255353	-3.1097	-1.68253	#N/A	#N/A	#N/A	#N/A	#N/A	#N/A
CG12521	FBgn0040816	0.91716	1.37658	-1.1408	-0.606349	-3.10982	-1.85808	#N/A	#N/A	#N/A	#N/A	#N/A	#N/A
Tengl3	FBgn0051679	0.732131	1.43086	-1.71508	-0.495855	-3.11707	-1.80646	#N/A	#N/A	#N/A	#N/A	#N/A	#N/A
glob2	FBgn0250846	0.743915	1.33427	-2.01244	-0.738815	-3.11967	-1.92924	#N/A	#N/A	#N/A	#N/A	#N/A	#N/A
CG15025	FBgn0038709	0.537799	1.32146	-2.04826	-0.490233	-3.1258	-1.80802	#N/A	#N/A	#N/A	#N/A	#N/A	#N/A
CG42855	FBgn0262102	0.624521	1.55454	-0.482596	-0.541761	-3.12632	-1.83404	#N/A	#N/A	#N/A	#N/A	#N/A	#N/A
CG14113	FBgn0040814	0.97165	1.57061	-1.3147	-0.788716	-3.13189	-1.9603	#N/A	#N/A	#N/A	#N/A	#N/A	#N/A
CG13442	FBgn0034546	0.803121	1.46442	-1.45796	-0.358064	-3.13571	-1.74688	#N/A	#N/A	#N/A	#N/A	#N/A	#N/A
CG15258	FBgn0032563	0.72945	1.41072	-2.22958	-0.569039	-3.13696	-1.853	#N/A	#N/A	#N/A	#N/A	#N/A	#N/A
CG33489	FBgn0053489	0.518816	1.14223	-0.868246	-0.427771	-3.13734	-1.78256	#N/A	#N/A	#N/A	#N/A	#N/A	#N/A
Actn3	FBgn0015008	0.403847	1.04576	-2.24302	-0.24844	-3.14177	-1.6951	#N/A	#N/A	#N/A	#N/A	#N/A	#N/A
CSN1a	FBgn0028838	0.459731	1.04944	-2.14783	-0.234677	-3.14288	-1.68878	#N/A	#N/A	#N/A	#N/A	#N/A	#N/A
CG11635	FBgn0033283	0.980318	1.60932	-2.18722	-0.454053	-3.1449	-1.79948	#N/A	#N/A	#N/A	#N/A	#N/A	#N/A
CG31735	FBgn0051735	0.493348	1.44975	-1.75496	-0.050882	-3.14849	-1.59969	#N/A	#N/A	#N/A	#N/A	#N/A	#N/A
CG43106	FBgn0262566	0.65959	1.45635	-2.2821	-0.558395	-3.14856	-1.85348	#N/A	#N/A	#N/A	#N/A	#N/A	#N/A
CG18131	FBgn0031343	0.493556	1.16259	-0.163637	-0.383203	-3.15654	-1.76987	#N/A	#N/A	#N/A	#N/A	#N/A	#N/A
CG31773	FBgn0051773	0.546626	1.58196	-1.75181	-0.340214	-3.16545	-1.75283	#N/A	#N/A	#N/A	#N/A	#N/A	#N/A
CG11018	FBgn0034464	0.797816	1.54693	-2.61121	-0.691869	-3.16952	-1.9307	#N/A	#N/A	#N/A	#N/A	#N/A	#N/A
CG9316	FBgn0032878	0.59184	1.09034	-0.835795	-0.465615	-3.17065	-1.81813	#N/A	#N/A	#N/A	#N/A	#N/A	#N/A
CG15296	FBgn0030215	0.643458	1.30213	-1.96623	-0.515842	-3.17333	-1.84459	#N/A	#N/A	#N/A	#N/A	#N/A	#N/A
CG7164	FBgn0031946	0.809949	1.58166	-1.57537	-0.105111	-3.17384	-1.63947	#N/A	#N/A	#N/A	#N/A	#N/A	#N/A
TTLL3B	FBgn0031853	0.841903	1.66717	-1.47721	-0.151975	-3.17774	-1.66486	#N/A	#N/A	#N/A	#N/A	#N/A	#N/A
CG12681	FBgn0029730	0.440066	1.12472	-1.16621	-0.485683	-3.18316	-1.83442	#N/A	#N/A	#N/A	#N/A	#N/A	#N/A
CG1340	FBgn0039797	0.860257	1.85513	-1.68412	-0.250278	-3.18871	-1.7195	#N/A	#N/A	#N/A	#N/A	#N/A	#N/A
CG14861	FBgn0038280	0.874171	1.54158	-2.03593	-0.640626	-3.18969	-1.91516	#N/A	#N/A	#N/A	#N/A	#N/A	#N/A
CG3557	FBgn0031423	0.390178	1.09147	-0.881941	-0.309064	-3.19294	-1.751	#N/A	#N/A	#N/A	#N/A	#N/A	#N/A
CG11145	FBgn0033168	0.636552	1.46561	-0.0730683	-0.182337	-3.19573	-1.68903	#N/A	#N/A	#N/A	#N/A	#N/A	#N/A
CG10845	FBgn0039246	0.663338	1.54308	-1.14979	-0.208512	-3.19773	-1.70312	#N/A	#N/A	#N/A	#N/A	#N/A	#N/A
CG6873	FBgn0030951	0.510807	1.21925	-1.76402	0.113101	-3.19824	-1.54257	#N/A	#N/A	#N/A	#N/A	#N/A	#N/A
CG30429	FBgn0050429	0.640637	1.4188	-2.01724	-0.296838	-3.19964	-1.74824	#N/A	#N/A	#N/A	#N/A	#N/A	#N/A
CG15638	FBgn0028943	0.901096	1.67948	-0.925269	-0.227033	-3.20323	-1.71513	#N/A	#N/A	#N/A	#N/A	#N/A	#N/A
CG12362	FBgn0036082	0.838904	1.4669	-2.10987	-0.267558	-3.2046	-1.73608	#N/A	#N/A	#N/A	#N/A	#N/A	#N/A
Acyp	FBgn0025115	0.826776	1.3766	-0.455819	-0.264587	-3.21336	-1.73898	#N/A	#N/A	#N/A	#N/A	#N/A	#N/A
CG6629	FBgn0037860	0.560191	1.46302	-1.66723	-0.160118	-3.21413	-1.68712	#N/A	#N/A	#N/A	#N/A	#N/A	#N/A
CG9106	FBgn0030624	0.418658	1.19796	-2.17879	-0.300811	-3.21531	-1.75806	#N/A	#N/A	#N/A	#N/A	#N/A	#N/A
CG15543	FBgn0039799	0.338759	1.01292	-1.475	-0.0926776	-3.21955	-1.65612	#N/A	#N/A	#N/A	#N/A	#N/A	#N/A
CG7634	FBgn0037101	0.411976	1.19147	-0.0256038	-0.221991	-3.22337	-1.72268	#N/A	#N/A	#N/A	#N/A	#N/A	#N/A
Klp59C	FBgn0034824	0.963011	1.84889	-2.48166	-0.228984	-3.23044	-1.72971	#N/A	#N/A	#N/A	#N/A	#N/A	#N/A
CG42570	FBgn0260776	0.243225	1.03368	-1.88824	-0.452142	-3.23071	-1.84143	#N/A	#N/A	#N/A	#N/A	#N/A	#N/A
CG12983	FBgn0037040	0.649233	1.5439	-1.80455	-0.274136	-3.23384	-1.75399	#N/A	#N/A	#N/A	#N/A	#N/A	#N/A
CG12620	FBgn0032626	0.731812	1.24724	-2.34077	-0.675074	-3.2353	-1.95519	#N/A	#N/A	#N/A	#N/A	#N/A	#N/A
Prosalpha6T	FBgn0032492	0.504925	1.34173	-1.84264	-0.155956	-3.24074	-1.69835	#N/A	#N/A	#N/A	#N/A	#N/A	#N/A
CG5556	FBgn0031332	0.522354	1.02736	-2.55845	-0.695812	-3.24076	-1.96829	#N/A	#N/A	#N/A	#N/A	#N/A	#N/A
CG15631	FBgn0031626	0.7329	1.49272	-2.17396	-0.280353	-3.25005	-1.7652	#N/A	#N/A	#N/A	#N/A	#N/A	#N/A
CG43077	FBgn0262487	0.623886	1.52191	1.36909	-0.49124	-3.25697	-1.8741	#N/A	#N/A	#N/A	#N/A	#N/A	#N/A
CG31805	FBgn0051805	0.512471	1.0003	-0.0496089	-0.900881	-3.25733	-2.07911	#N/A	#N/A	#N/A	#N/A	#N/A	#N/A
CG15283	FBgn0028844	0.309582	1.03188	-1.06361	-0.187416	-3.26412	-1.72577	#N/A	#N/A	#N/A	#N/A	#N/A	#N/A
CG14605	FBgn0037486	0.642532	1.40157	-1.88721	-0.302175	-3.26597	-1.78407	#N/A	#N/A	#N/A	#N/A	#N/A	#N/A
wa-cup	FBgn0037502	0.474822	1.41482	-1.97433	-0.205523	-3.27369	-1.73961	#N/A	#N/A	#N/A	#N/A	#N/A	#N/A
CG12784	FBgn0038356	0.931616	1.42872	-1.54424	-0.690323	-3.27951	-1.98492	#N/A	#N/A	#N/A	#N/A	#N/A	#N/A
CG12831	FBgn0033141	0.47957	1.27031	-1.18704	-0.764701	-3.27969	-2.0222	#N/A	#N/A	#N/A	#N/A	#N/A	#N/A
CG11929	FBgn0031620	0.724922	1.41684	0.133654	-0.348031	-3.28289	-1.81546	#DIV/0!	#DIV/0!	#DIV/0!	#DIV/0!	#DIV/0!	#DIV/0!
CG30369	FBgn0050369	0.774323	1.37039	-1.4873	-0.850114	-3.28478	-2.06745	#N/A	#N/A	#N/A	#N/A	#N/A	#N/A
CG2336	FBgn0037455	0.472916	1.11092	-2.4278	-0.0953821	-3.28837	-1.69188	#N/A	#N/A	#N/A	#N/A	#N/A	#N/A
CG6914	FBgn0037172	0.753067	1.10197	-2.0907	-0.507174	-3.29063	-1.8989	#N/A	#N/A	#N/A	#N/A	#N/A	#N/A
c-cup	FBgn0031367	0.838943	1.6114	-1.14603	-0.461776	-3.29422	-1.878	#N/A	#N/A	#N/A	#N/A	#N/A	#N/A
CG4073	FBgn0037827	0.393893	1.01072	-1.00212	-0.457734	-3.29461	-1.87617	#N/A	#N/A	#N/A	#N/A	#N/A	#N/A
schuy	FBgn0036925	0.896881	1.76981	-2.97892	-0.246651	-3.29986	-1.77326	#N/A	#N/A	#N/A	#N/A	#N/A	#N/A
CG13280	FBgn0032609	0.773072	1.46904	0.443779	-0.200031	-3.30476	-1.7524	#N/A	#N/A	#N/A	#N/A	#N/A	#N/A
CG3809	FBgn0037995	0.860435	1.74645	-2.5498	-0.180756	-3.30708	-1.74392	#N/A	#N/A	#N/A	#N/A	#N/A	#N/A
VhaM9.7-d	FBgn0038458	0.715703	1.09802	-1.40221	-0.579086	-3.30856	-1.94382	#N/A	#N/A	#N/A	#N/A	#N/A	#N/A
CG4270	FBgn0031407	0.527614	1.2002	-2.12147	-0.414054	-3.31063	-1.86234	#N/A	#N/A	#N/A	#N/A	#N/A	#N/A
CG42597	FBgn0260996	0.521531	1.30577	-0.265953	-0.552749	-3.31063	-1.93169	#N/A	#N/A	#N/A	#N/A	#N/A	#N/A
CG14101	FBgn0036905	0.5753	1.37584	-1.94985	-0.175387	-3.31082	-1.7431	#N/A	#N/A	#N/A	#N/A	#N/A	#N/A
CG12679	FBgn0031103	0.72217	1.60986	-1.88171	-0.349859	-3.31311	-1.83149	#N/A	#N/A	#N/A	#N/A	#N/A	#N/A
Crtp	FBgn0029501	0.587793	1.45428	-1.89424	-0.212667	-3.3147	-1.76369	#N/A	#N/A	#N/A	#N/A	#N/A	#N/A
CG7309	FBgn0032314	0.916678	1.74288	-1.79491	-0.469786	-3.32035	-1.89507	#N/A	#N/A	#N/A	#N/A	#N/A	#N/A
CG7551	FBgn0036161	0.513498	1.0411	-2.82373	-0.331009	-3.32695	-1.82898	#N/A	#N/A	#N/A	#N/A	#N/A	#N/A
CG9483	FBgn0032072	0.505471	1.19654	-2.31593	-0.531736	-3.32853	-1.93013	#N/A	#N/A	#N/A	#N/A	#N/A	#N/A
CG18266	FBgn0031724	0.959347	1.95874	-0.852102	-0.586696	-3.33679	-1.96174	#N/A	#N/A	#N/A	#N/A	#N/A	#N/A
CG31459	FBgn0051459	0.844851	1.74975	-1.69058	-0.119934	-3.3398	-1.72987	#N/A	#N/A	#N/A	#N/A	#N/A	#N/A
CG34425	FBgn0085454	0.558599	1.36483	-1.34009	-0.449319	-3.34629	-1.89781	#N/A	#N/A	#N/A	#N/A	#N/A	#N/A
CG17010	FBgn0032424	0.800271	1.53136	-2.03327	-0.132827	-3.3527	-1.74276	#N/A	#N/A	#N/A	#N/A	#N/A	#N/A
CG18418	FBgn0035568	0.996658	1.69874	-2.96715	-0.647866	-3.35301	-2.00044	#N/A	#N/A	#N/A	#N/A	#N/A	#N/A
FucTD	FBgn0035217	0.774521	1.61542	-2.13972	-0.310722	-3.36448	-1.8376	#N/A	#N/A	#N/A	#N/A	#N/A	#N/A
Vha68-3	FBgn0032464	0.583552	1.4898	-0.81785	-0.0548411	-3.36823	-1.71154	#N/A	#N/A	#N/A	#N/A	#N/A	#N/A
CG3492	FBgn0035007	0.8727	1.69836	-2.64503	-0.222784	-3.37038	-1.79658	#N/A	#N/A	#N/A	#N/A	#N/A	#N/A
CG10164	FBgn0039088	0.828394	1.83758	-3.37475	-0.118131	-3.37988	-1.74901	#N/A	#N/A	#N/A	#N/A	#N/A	#N/A
CG2871	FBgn0029725	0.635687	1.4974	-0.787961	-0.53384	-3.38461	-1.95923	#N/A	#N/A	#N/A	#N/A	#N/A	#N/A
CG16716	FBgn0034459	0.632249	1.38684	-1.66517	-0.215429	-3.38476	-1.8001	#N/A	#N/A	#N/A	#N/A	#N/A	#N/A
CG5755	FBgn0032664	0.577029	1.44891	-1.54465	-0.51411	-3.38874	-1.95142	#N/A	#N/A	#N/A	#N/A	#N/A	#N/A
CG7094	FBgn0032650	0.732129	1.31055	-1.38802	-0.667723	-3.3931	-2.03041	#N/A	#N/A	#N/A	#N/A	#N/A	#N/A
CG15576	FBgn0029700	0.528902	1.27351	-1.28943	-0.111329	-3.39678	-1.75405	#N/A	#N/A	#N/A	#N/A	#N/A	#N/A
CG15764	FBgn0029817	0.37816	1.20067	-0.827701	-0.285018	-3.4197	-1.85236	#N/A	#N/A	#N/A	#N/A	#N/A	#N/A
CG15035	FBgn0029949	0.698276	1.11334	-1.50839	-0.764053	-3.42764	-2.09585	#N/A	#N/A	#N/A	#N/A	#N/A	#N/A
ssp5	FBgn0037985	0.637729	1.86807	-2.15392	-0.0239132	-3.42917	-1.72654	#N/A	#N/A	#N/A	#N/A	#N/A	#N/A
S-Lap5	FBgn0033860	0.703334	1.60874	-1.01115	-0.209564	-3.43524	-1.8224	#N/A	#N/A	#N/A	#N/A	#N/A	#N/A
CG34204	FBgn0085233	0.506224	1.25759	-1.39848	-0.37011	-3.44045	-1.90528	#N/A	#N/A	#N/A	#N/A	#N/A	#N/A
CG31407	FBgn0051407	0.929799	1.66584	-1.87598	-0.386468	-3.44338	-1.91492	#N/A	#N/A	#N/A	#N/A	#N/A	#N/A
CG42383	FBgn0259729	0.863313	1.36872	-2.66448	-0.179034	-3.44747	-1.81325	#N/A	#N/A	#N/A	#N/A	#N/A	#N/A
CG32081	FBgn0052081	0.842223	1.95018	-1.27541	-0.682708	-3.45146	-2.06709	#N/A	#N/A	#N/A	#N/A	#N/A	#N/A
CG9582	FBgn0032090	0.488643	1.19433	-1.92495	-0.653601	-3.45227	-2.05293	#N/A	#N/A	#N/A	#N/A	#N/A	#N/A
CG6209	FBgn0033862	0.763212	1.57845	-1.65034	-0.222656	-3.45456	-1.83861	#N/A	#N/A	#N/A	#N/A	#N/A	#N/A
CG14011	FBgn0031722	0.485436	1.0206	-0.634408	-0.659434	-3.4548	-2.05712	#N/A	#N/A	#N/A	#N/A	#N/A	#N/A
CG31128	FBgn0051128	0.466089	1.0819	-1.34006	-0.176939	-3.45886	-1.8179	#N/A	#N/A	#N/A	#N/A	#N/A	#N/A
CG30177	FBgn0050177	0.45195	1.0001	-1.80638	-0.397871	-3.47409	-1.93598	#N/A	#N/A	#N/A	#N/A	#N/A	#N/A
CG31882	FBgn0051882	0.666091	1.42723	-0.867275	-0.156948	-3.47636	-1.81665	#N/A	#N/A	#N/A	#N/A	#N/A	#N/A
CG14402	FBgn0032894	0.559349	1.24516	-1.16895	-0.345045	-3.47835	-1.9117	#N/A	#N/A	#N/A	#N/A	#N/A	#N/A
CG12126	FBgn0033280	0.384015	1.14787	-2.17172	-0.770331	-3.47848	-2.12441	#N/A	#N/A	#N/A	#N/A	#N/A	#N/A
CG32061	FBgn0052061	0.893136	1.27669	-3.19776	-0.562377	-3.48862	-2.0255	#N/A	#N/A	#N/A	#N/A	#N/A	#N/A
CG42710	FBgn0261627	0.335564	1.12117	-2.33715	-0.242669	-3.50362	-1.87315	#N/A	#N/A	#N/A	#N/A	#N/A	#N/A
CG13725	FBgn0036708	0.733995	1.4394	-3.14192	-0.509333	-3.50379	-2.00656	#N/A	#N/A	#N/A	#N/A	#N/A	#N/A
CG31204	FBgn0051204	0.726888	1.66955	-1.87761	-0.318532	-3.50891	-1.91372	#N/A	#N/A	#N/A	#N/A	#N/A	#N/A
CG12692	FBgn0029703	0.326409	1.17909	-0.460146	-0.418392	-3.54775	-1.98307	#N/A	#N/A	#N/A	#N/A	#N/A	#N/A
CG43168	FBgn0262787	0.488406	1.25768	-1.97455	-0.32865	-3.55258	-1.94062	#N/A	#N/A	#N/A	#N/A	#N/A	#N/A
CG9406	FBgn0034592	0.48374	1.05869	-0.551238	-0.345515	-3.56427	-1.95489	#N/A	#N/A	#N/A	#N/A	#N/A	#N/A
CG32655	FBgn0052655	0.91767	1.71267	-2.6719	-0.265658	-3.56901	-1.91733	#N/A	#N/A	#N/A	#N/A	#N/A	#N/A
CG11663	FBgn0029539	0.603935	1.33885	-1.5665	-0.493198	-3.57387	-2.03353	#N/A	#N/A	#N/A	#N/A	#N/A	#N/A
CG13337	FBgn0033863	0.221548	1.34685	-2.48783	-0.012279	-3.58065	-1.79646	#N/A	#N/A	#N/A	#N/A	#N/A	#N/A
CG13700	FBgn0036785	0.822885	1.69951	-2.95718	-0.272407	-3.58302	-1.92772	#N/A	#N/A	#N/A	#N/A	#N/A	#N/A
CG15286	FBgn0028531	0.733571	1.70199	-0.988241	-0.201259	-3.58717	-1.89421	#N/A	#N/A	#N/A	#N/A	#N/A	#N/A
CG4480	FBgn0032553	0.515719	1.25411	-0.796526	-0.547008	-3.58734	-2.06718	#N/A	#N/A	#N/A	#N/A	#N/A	#N/A
CG7716	FBgn0035800	0.440801	1.1526	-2.00604	-0.331381	-3.59619	-1.96378	#N/A	#N/A	#N/A	#N/A	#N/A	#N/A
hale	FBgn0036924	0.305368	1.34248	-1.18291	0.196904	-3.59729	-1.70019	#DIV/0!	#DIV/0!	#DIV/0!	#DIV/0!	#DIV/0!	#DIV/0!
CG15260	FBgn0028850	0.538929	1.25574	-1.8584	-0.410341	-3.61158	-2.01096	#N/A	#N/A	#N/A	#N/A	#N/A	#N/A
CG13385	FBgn0032039	0.415366	1.08371	-2.57539	-0.203443	-3.61382	-1.90863	#N/A	#N/A	#N/A	#N/A	#N/A	#N/A
CG3092	FBgn0034835	0.719746	1.44224	-2.57901	-0.238641	-3.62121	-1.92992	#N/A	#N/A	#N/A	#N/A	#N/A	#N/A
CG6138	FBgn0032268	0.478596	1.44233	-2.49878	-0.0664458	-3.62201	-1.84423	#N/A	#N/A	#N/A	#N/A	#N/A	#N/A
CG7557	FBgn0036159	0.725168	1.69257	-1.40705	-0.208426	-3.62271	-1.91557	#N/A	#N/A	#N/A	#N/A	#N/A	#N/A
CG4631	FBgn0032590	0.959652	1.83374	-3.2343	-0.219327	-3.62884	-1.92408	#N/A	#N/A	#N/A	#N/A	#N/A	#N/A
Tim17a1	FBgn0038018	0.22844	1.07152	-0.0542204	0.153583	-3.63978	-1.7431	#N/A	#N/A	#N/A	#N/A	#N/A	#N/A
eIF4E-7	FBgn0040368	0.401465	1.13185	-1.88217	-0.391102	-3.65815	-2.02463	#N/A	#N/A	#N/A	#N/A	#N/A	#N/A
CG9173	FBgn0035218	0.689033	1.44302	-1.94935	-0.313626	-3.66187	-1.98775	#N/A	#N/A	#N/A	#N/A	#N/A	#N/A
CG12464	FBgn0033861	0.643548	1.22019	-1.95899	-0.759303	-3.66209	-2.2107	#N/A	#N/A	#N/A	#N/A	#N/A	#N/A
CG10862	FBgn0035455	0.758084	1.69079	-0.73199	-0.46044	-3.6711	-2.06577	#N/A	#N/A	#N/A	#N/A	#N/A	#N/A
CG11262	FBgn0036329	0.360009	1.02342	-1.44181	-0.108881	-3.69514	-1.90201	#N/A	#N/A	#N/A	#N/A	#N/A	#N/A
CG5122	FBgn0032471	0.496759	1.2596	-2.20664	-0.230023	-3.69929	-1.96465	#N/A	#N/A	#N/A	#N/A	#N/A	#N/A
CG30412	FBgn0050412	0.884079	1.749	-2.51959	-0.203082	-3.70246	-1.95277	#N/A	#N/A	#N/A	#N/A	#N/A	#N/A
CG33287	FBgn0053287	0.375876	1.03727	-1.67241	-0.0352932	-3.70318	-1.86924	#N/A	#N/A	#N/A	#N/A	#N/A	#N/A
CG15147	FBgn0032654	0.454177	1.01014	-1.9807	-0.0622072	-3.70378	-1.883	#N/A	#N/A	#N/A	#N/A	#N/A	#N/A
CG5388	FBgn0038944	0.806558	1.17176	-0.806994	-0.546754	-3.70631	-2.12653	#N/A	#N/A	#N/A	#N/A	#N/A	#N/A
CG32396	FBgn0052396	0.502997	1.27782	-1.39329	-0.31711	-3.71633	-2.01672	#N/A	#N/A	#N/A	#N/A	#N/A	#N/A
CG16964	FBgn0032385	0.7619	1.41217	-1.89061	-0.663153	-3.73742	-2.20028	#N/A	#N/A	#N/A	#N/A	#N/A	#N/A
CG4988	FBgn0032372	1.18274	0.854456	-1.3183	-0.370836	-3.73881	-2.05482	#N/A	#N/A	#N/A	#N/A	#N/A	#N/A
CG4198	FBgn0029753	0.932009	1.5758	-2.25465	-0.471531	-3.75139	-2.11146	#N/A	#N/A	#N/A	#N/A	#N/A	#N/A
CG30350	FBgn0050350	0.739054	1.5011	-2.27339	-0.24056	-3.76052	-2.00054	#N/A	#N/A	#N/A	#N/A	#N/A	#N/A
CG31787	FBgn0051787	0.967364	1.68207	-1.39804	-0.627931	-3.76097	-2.19445	#N/A	#N/A	#N/A	#N/A	#N/A	#N/A
Prosbeta5R	FBgn0034842	0.741161	1.4828	-2.11573	-0.531935	-3.78448	-2.15821	#N/A	#N/A	#N/A	#N/A	#N/A	#N/A
CG31804	FBgn0051804	0.447292	1.32275	-2.49423	-0.282373	-3.78585	-2.03411	#N/A	#N/A	#N/A	#N/A	#N/A	#N/A
CG15572	FBgn0029702	0.665714	1.32677	-0.999462	-0.37562	-3.78916	-2.08239	#N/A	#N/A	#N/A	#N/A	#N/A	#N/A
CG5906	FBgn0036217	0.715739	1.38052	-1.47331	-0.254835	-3.79931	-2.02707	#N/A	#N/A	#N/A	#N/A	#N/A	#N/A
CG3473	FBgn0028913	0.502984	1.17037	-0.162093	-0.20764	-3.81162	-2.00963	#DIV/0!	#DIV/0!	#DIV/0!	#DIV/0!	#DIV/0!	#DIV/0!
CG14689	FBgn0037826	0.365504	1.00373	-2.38286	-0.347745	-3.83729	-2.09252	#N/A	#N/A	#N/A	#N/A	#N/A	#N/A
CG15086	FBgn0034374	0.544839	1.7633	-2.13325	-0.158969	-3.84401	-2.00149	#N/A	#N/A	#N/A	#N/A	#N/A	#N/A
t-cup	FBgn0051858	0.848899	1.69734	-0.445286	-0.194362	-3.85206	-2.02321	#N/A	#N/A	#N/A	#N/A	#N/A	#N/A
CG42850	FBgn0262097	0.689543	1.70921	-2.27652	-0.443213	-3.86298	-2.1531	#N/A	#N/A	#N/A	#N/A	#N/A	#N/A
CG32236	FBgn0046793	0.633667	1.51422	-1.77463	-0.38213	-3.86866	-2.12539	#N/A	#N/A	#N/A	#N/A	#N/A	#N/A
CG18109	FBgn0028901	0.43659	1.01242	-2.17756	-0.309777	-3.91058	-2.11018	#N/A	#N/A	#N/A	#N/A	#N/A	#N/A
CG12289	FBgn0036160	0.588484	1.3463	-3.18314	-0.33951	-3.95114	-2.14533	#N/A	#N/A	#N/A	#N/A	#N/A	#N/A
CG31010	FBgn0051010	0.662583	1.34111	-2.92651	-0.436653	-4.01221	-2.22443	#N/A	#N/A	#N/A	#N/A	#N/A	#N/A
CG15256	FBgn0028880	0.470189	1.09827	-1.56912	-0.689571	-4.02171	-2.35564	#N/A	#N/A	#N/A	#N/A	#N/A	#N/A
CG4810	FBgn0037994	0.609047	1.1267	-2.54135	-0.863046	-4.03664	-2.44984	#N/A	#N/A	#N/A	#N/A	#N/A	#N/A
CG13978	FBgn0039518	0.830965	1.67497	-1.53002	-0.461145	-4.04792	-2.25453	#N/A	#N/A	#N/A	#N/A	#N/A	#N/A
CG31294	FBgn0051294	0.971166	1.46552	-2.19024	-0.583545	-4.06333	-2.32344	#N/A	#N/A	#N/A	#N/A	#N/A	#N/A
CG11588	FBgn0036221	0.52801	1.23822	-1.14761	-0.645463	-4.06644	-2.35595	#N/A	#N/A	#N/A	#N/A	#N/A	#N/A
CG3483	FBgn0035005	0.719838	1.53996	-2.23179	-0.202319	-4.1192	-2.16076	#N/A	#N/A	#N/A	#N/A	#N/A	#N/A
CR43905	FBgn0264506	0.181988	1.10718	-1.11631	0.0632192	-4.16474	-2.05076	#N/A	#N/A	#N/A	#N/A	#N/A	#N/A
CG9970	FBgn0035380	0.679478	1.49561	-1.24993	-0.433289	-4.2077	-2.32049	#N/A	#N/A	#N/A	#N/A	#N/A	#N/A
Adgf-E	FBgn0033952	0.754967	1.32484	-2.56337	-0.348824	-4.23488	-2.29185	#N/A	#N/A	#N/A	#N/A	#N/A	#N/A
Vha100-3	FBgn0028669	0.486905	1.0891	-1.7023	-0.767178	-4.28473	-2.52596	#N/A	#N/A	#N/A	#N/A	#N/A	#N/A
CG31533	FBgn0051533	0.60922	1.4696	-2.1793	-0.470476	-4.37457	-2.42252	#N/A	#N/A	#N/A	#N/A	#N/A	#N/A
CG11251	FBgn0036346	0.436836	1.12187	-1.53515	-0.32079	-4.67353	-2.49716	#N/A	#N/A	#N/A	#N/A	#N/A	#N/A
CG31327	FBgn0051327	0.595724	1.33468	-1.22933	-0.413231	-4.71328	-2.56326	#N/A	#N/A	#N/A	#N/A	#N/A	#N/A
Adgf-B	FBgn0036751	0.444784	1.03467	-1.56745	-0.111333	-4.79506	-2.45319	#DIV/0!	#DIV/0!	#DIV/0!	#DIV/0!	#DIV/0!	#DIV/0!
CG4757	FBgn0027584	1.61303	-1.16402	0.490851	0.0296169	0.241942	0.135779	0.124607	-1.17095	0.60543	0.758301	0.467992	0.613146
CG43147	FBgn0262623	-1.35743	4.75362	-1.27758	1.0926	-0.522553	0.285021	#N/A	#N/A	#N/A	#N/A	#N/A	#N/A
Met75Cb	FBgn0028415	-1.02266	2.46812	-0.455176	2.10612	-1.54122	0.28245	#N/A	#N/A	#N/A	#N/A	#N/A	#N/A
b	FBgn0000153	0.876373	0.820959	-0.097131	-0.234676	-0.283541	-0.259108	0.988598	0.815325	-0.126623	0.0768973	0.225431	0.151164
CG9512	FBgn0030593	0.365823	0.171343	-0.158644	-0.0270578	0.0154937	-0.00578203	0.977461	0.498906	0.047313	0.345072	0.197224	0.271148
CG11200	FBgn0034500	0.425674	-0.0809366	-0.21977	-0.0654806	0.00236444	-0.0315581	0.964716	0.40799	0.381117	0.0803103	-0.25916	-0.0894246
sPLA2	FBgn0033170	0.339235	0.248672	0.105348	0.13869	0.0813877	0.110039	0.937771	0.270235	-0.0457594	-0.377599	-0.333169	-0.355384
Torsin	FBgn0025615	0.990944	0.741583	0.00650836	-0.0352775	0.0148626	-0.0102075	0.936876	0.542682	0.00618276	0.186602	0.382847	0.284725
CG6409	FBgn0036106	0.572386	0.209051	0.0598729	0.0554779	0.0910047	0.0732413	0.934423	0.612767	0.265556	0.187785	0.312063	0.249924
CG7506	FBgn0035805	0.194531	0.18165	0.00895743	0.0479	0.0466715	0.0472858	0.928029	0.719828	-0.539343	-0.869697	-0.802244	-0.83597
CG7194	FBgn0035868	0.558706	0.0963257	0.54478	0.127936	0.449422	0.288679	0.926981	0.944514	#DIV/0!	#DIV/0!	#DIV/0!	#DIV/0!
CG10063	FBgn0035727	0.0728661	0.815212	-0.271089	-0.594365	-1.65092	-1.12264	0.91514	0.609534	#DIV/0!	#DIV/0!	#DIV/0!	#DIV/0!
CG8451	FBgn0031998	0.476563	0.297592	-0.198357	0.0133116	0.0301442	0.0217279	0.910856	0.54834	#DIV/0!	#DIV/0!	#DIV/0!	#DIV/0!
Mal-A6	FBgn0050360	0.976901	0.140732	-0.159676	0.044031	0.115905	0.079968	0.894167	0.837752	-1.08087	0.749192	0.290201	0.519696
CG10420	FBgn0039296	0.158377	-0.399686	0.331951	-0.0383872	0.244489	0.103051	0.884858	0.982201	0.832382	0.571103	0.470815	0.520959
CG17324	FBgn0027074	0.557913	0.105566	0.33584	0.0500642	0.23228	0.141172	0.88046	0.61978	#DIV/0!	#DIV/0!	#DIV/0!	#DIV/0!
CG15661	FBgn0034605	0.793775	0.302457	0.176468	0.134955	0.297366	0.21616	0.874748	0.736295	0.760566	0.811524	0.259515	0.535519
CG14275	FBgn0032022	0.828079	0.532184	-0.149345	-0.0299662	-0.0145676	-0.0222669	0.858411	0.350714	-0.204245	-0.2184	-0.054904	-0.136652
DNaseII	FBgn0000477	0.286377	-0.13731	-0.0145668	0.0268492	0.0968503	0.0618498	0.856023	0.431094	0.518163	0.370508	0.403895	0.387202
Dh31	FBgn0032048	0.162006	0.412338	0.0977282	0.0779004	0.0343557	0.056128	0.847756	0.687858	0.182993	0.374205	0.323827	0.349016
Cyp305a1	FBgn0036910	0.120461	0.256347	-0.428062	-0.120933	-0.117563	-0.119248	0.842596	0.678213	0.302072	-0.0158904	-0.0552611	-0.0355758
CG43322	FBgn0263027	0.78792	0.756853	-0.465275	-0.406251	-0.324361	-0.365306	0.838813	0.444636	#DIV/0!	#DIV/0!	#DIV/0!	#DIV/0!
CG16826	FBgn0032505	0	0.109516	-0.0818558	0.0123406	0	0.0061703	0.836027	0.614055	1.32885	0.68336	0.393529	0.538444
CG33228	FBgn0261373	-0.0906458	-0.0962446	-0.209051	-0.14761	-0.0691017	-0.108356	0.825814	0.5144	-0.307874	-0.643852	-0.735763	-0.689807
Jon99Cii	FBgn0003356	0.540588	-0.24508	-1.49147	-0.149947	-0.0943752	-0.122161	0.81388	0.281982	#DIV/0!	#DIV/0!	#DIV/0!	#DIV/0!
CG8249	FBgn0034045	0.494112	0.147707	-0.0677195	0.0745934	0.254808	0.164701	0.803991	0.86772	#DIV/0!	#DIV/0!	#DIV/0!	#DIV/0!
CG31321	FBgn0051321	-0.0783388	-0.137284	-0.194969	-0.169661	-0.0841872	-0.126924	0.803087	0.666626	#DIV/0!	#DIV/0!	#DIV/0!	#DIV/0!
CG11147	FBgn0031734	0.257054	0.295382	-0.066067	-0.00896757	-0.00513513	-0.00705135	0.802901	0.918777	#DIV/0!	#DIV/0!	#DIV/0!	#DIV/0!
CG40006	FBgn0058006	0.420171	0.249841	-0.224929	-0.0934824	-0.0018358	-0.0476591	0.802316	0.995282	-0.367277	-0.402431	-0.756993	-0.579712
CG43055	FBgn0262357	0.663305	-0.598492	-0.276019	0.00841413	0.326785	0.1676	0.800359	0.44956	#DIV/0!	#DIV/0!	#DIV/0!	#DIV/0!
Jon44E	FBgn0001285	-0.623783	0.153468	-1.948	0.382177	0.0102727	0.196225	0.796984	0.149992	#DIV/0!	#DIV/0!	#DIV/0!	#DIV/0!
Jon25Biii	FBgn0031653	-0.349445	0.810969	-2.28838	0.152426	-0.383242	-0.115408	0.796984	0.149992	#DIV/0!	#DIV/0!	#DIV/0!	#DIV/0!
CG30197	FBgn0050197	0.450703	-0.0522122	0.083394	0.0375249	0.110592	0.0740586	0.796567	0.31958	0.416498	0.0991314	0.490812	0.294972
lcs	FBgn0028583	-0.194631	-0.615818	-0.048376	0.00983396	0.0545998	0.0322169	0.790741	0.631107	#DIV/0!	#DIV/0!	#DIV/0!	#DIV/0!
Cyp4e1	FBgn0015034	0.385056	0.102796	-0.349267	-0.180417	-0.0175418	-0.0989793	0.780088	0.584643	0.115788	-0.0446247	-0.181756	-0.11319
CG9921	FBgn0030743	0.645516	0.644354	-0.160827	0.0467753	0.0867969	0.0667861	0.779578	0.441309	0.184636	0.362546	0.572664	0.467605
CG15653	FBgn0034578	0.356457	0.356632	0.204789	0.031052	0.0260126	0.0285323	0.776154	0.750055	0.147661	0.195336	0.242364	0.21885
140up	FBgn0010340	0.214693	0.110803	-0.0579595	-0.123832	-0.0301703	-0.0770014	0.75926	0.818615	-0.0581378	-0.37229	-0.750193	-0.561242
CG13126	FBgn0032168	-0.450915	-0.512276	0.247287	0.312801	0.493492	0.403146	0.758048	0.998649	0.154821	-0.274693	-0.505751	-0.390222
Kdm4B	FBgn0053182	-0.412745	-0.488299	0.341378	0.448634	0.497151	0.472893	0.757113	0.792922	#DIV/0!	#DIV/0!	#DIV/0!	#DIV/0!
CG33514	FBgn0053514	0.868646	0.64405	-1.17007	-0.027408	-0.0577231	-0.0425655	0.752908	0.95316	#DIV/0!	#DIV/0!	#DIV/0!	#DIV/0!
Hsp27	FBgn0001226	0.387887	0.580919	0.69229	0.139744	-0.284806	-0.0725308	0.752872	0.187548	#DIV/0!	#DIV/0!	#DIV/0!	#DIV/0!
Mocs1	FBgn0263241	0.181743	-0.288463	-0.0429784	0.0486124	0.245518	0.147065	0.752737	0.0059926	-0.137832	-0.0221009	0.171974	0.0749365
CG15556	FBgn0039821	0.473689	0.114307	0.0931147	0.0637842	0.215925	0.139854	0.75237	0.676426	#DIV/0!	#DIV/0!	#DIV/0!	#DIV/0!
CG10513	FBgn0039311	0.371445	0.55936	-0.511173	-0.0751954	-0.194684	-0.13494	0.74643	0.676673	-0.407351	-0.0555882	0.330286	0.137349
CG8654	FBgn0034479	-0.343971	0.0391995	-0.219825	0.0759632	0.0394581	0.0577107	0.741338	0.546755	#DIV/0!	#DIV/0!	#DIV/0!	#DIV/0!
Axs	FBgn0000152	-0.212698	-0.568171	0.195881	-0.0157536	0.390307	0.187276	0.74057	0.720679	#DIV/0!	#DIV/0!	#DIV/0!	#DIV/0!
CG34120	FBgn0083956	0.585376	0.460643	-0.0190713	-0.0234209	-0.0217109	-0.0225659	0.736321	0.917338	0.475077	0.164802	-0.0694954	0.0476535
obst-A	FBgn0031097	0.643175	0.581634	-0.14583	-0.316901	-0.394973	-0.355937	0.730235	0.532557	-0.191514	-0.352003	-0.242029	-0.297016
Cyp4e2	FBgn0014469	0.461236	0.392813	-0.0261578	0.0910924	0.115699	0.103396	0.729437	0.650659	0.0923393	0.154585	-0.0217718	0.0664068
alpha-Est10	FBgn0015569	0.652322	0.376406	-0.113941	-0.0901357	0.0034947	-0.0433205	0.729256	0.713284	0.0580591	-0.15011	-0.0739759	-0.112043
alphaTry	FBgn0003863	0.761233	0.153702	-0.192027	-0.00469709	-0.00613434	-0.00541571	0.726169	0.224104	-0.211055	0.398267	0.116202	0.257234
CG31549	FBgn0051549	0.663125	0.508045	0.0939021	0.0598713	0.0857285	0.0727999	0.725504	0.819614	-0.0493132	0.1975	0.249813	0.223656
CG14591	FBgn0033054	-0.0730411	0.170696	-0.305761	-0.39898	-0.349217	-0.374098	0.723101	0.667103	#DIV/0!	#DIV/0!	#DIV/0!	#DIV/0!
CG9548	FBgn0031822	0.371688	0.370952	0.139264	0.0178817	0.0821471	0.0500144	0.723004	0.836932	-0.375457	-0.73112	-0.878963	-0.805041
Fmo-1	FBgn0034943	-0.0333451	0.0477182	-0.09763	0.062772	0.112528	0.0876498	0.712021	0.676064	-0.221925	-0.191371	0.193037	0.00083261
CG8331	FBgn0033906	-0.0112792	0.0196581	-0.0395914	-0.0314734	-0.0493494	-0.0404114	0.708098	0.784528	0.339401	-0.0902954	-0.461491	-0.275893
CG18869	FBgn0042179	0.113854	0.565325	-0.583531	0.105833	-0.312543	-0.103355	0.706439	0.415036	#DIV/0!	#DIV/0!	#DIV/0!	#DIV/0!
Cht5	FBgn0038180	0.492531	-0.377213	0.109082	-0.0674185	0.532723	0.232652	0.705051	-0.44976	#DIV/0!	#DIV/0!	#DIV/0!	#DIV/0!
rdhB	FBgn0038946	0.216524	-0.544355	-0.935693	-0.2482	0.328861	0.040331	0.701157	0.459129	#DIV/0!	#DIV/0!	#DIV/0!	#DIV/0!
Mal-A8	FBgn0033297	0.608684	0.302642	-0.323762	0.0250138	0.0409864	0.0330001	0.695395	0.688721	-0.606814	0.503714	0.489028	0.496371
Gpb5	FBgn0063368	0.138985	-0.0163703	0.0334532	0.0197717	0.150406	0.0850889	0.693492	0.229775	#DIV/0!	#DIV/0!	#DIV/0!	#DIV/0!
CG3746	FBgn0034755	0.230518	-0.130391	-0.252477	-0.22721	-0.0246925	-0.125951	0.683187	0.239009	#DIV/0!	#DIV/0!	#DIV/0!	#DIV/0!
Cyp309a2	FBgn0041337	0.135384	-0.113587	0.0485842	0.0626345	0.197051	0.129843	0.682312	0.574476	#DIV/0!	#DIV/0!	#DIV/0!	#DIV/0!
CG10262	FBgn0032813	-0.0727437	-0.343222	0.0110826	0.0154679	0.214755	0.115111	0.679889	0.451726	-0.435507	-0.0503176	0.0650417	0.00736207
Snmp1	FBgn0260004	0.392887	-0.226753	0.0303757	-0.0164997	0.112826	0.0481631	0.678631	0.230467	#DIV/0!	#DIV/0!	#DIV/0!	#DIV/0!
CG11737	FBgn0037592	-0.134367	-0.252834	-0.101403	-0.00980834	0.0275658	0.00887873	0.678075	0.745307	0.0221442	-0.242761	-0.791349	-0.517055
Cyp4ac2	FBgn0031694	0.410687	0.153939	-0.226788	-0.0784816	0.0399086	-0.0192865	0.675886	0.413233	-0.411776	-0.297349	-0.546401	-0.421875
CG31676	FBgn0051676	0.459917	0.235725	0.00796769	-0.0198918	0.0159298	-0.00198099	0.674953	0.409131	0.296894	0.304243	0.0748634	0.189553
CG8306	FBgn0034142	0.727329	0.601631	-0.0400114	-0.0550397	-0.0019792	-0.0285094	0.672662	0.810219	0.387264	0.194448	-0.412725	-0.109138
CG14806	FBgn0029594	0.465579	0.478081	-0.149412	-0.146717	-0.0694806	-0.108099	0.6716	0.684677	#DIV/0!	#DIV/0!	#DIV/0!	#DIV/0!
CG3394	FBgn0034999	0.419904	0.811991	-0.154261	-0.0709357	-0.0740256	-0.0724806	0.670618	0.509851	-0.230834	-0.982918	-0.813557	-0.898238
wbl	FBgn0004003	-0.199688	0.821292	-0.125178	0.0168274	-0.435396	-0.209284	0.668359	0.580416	0.509775	-0.194932	0.136303	-0.0293144
CG32444	FBgn0043783	0.268944	0.410183	-0.202951	0.0724329	0.117397	0.0949148	0.668314	0.52095	-0.371611	-0.225577	0.516485	0.145454
CG7675	FBgn0038610	-0.147148	-0.365305	-0.0665506	0.0068731	-0.0123411	-0.00273398	0.666077	0.421205	0.0495199	0.194545	0.0301175	0.112331
CG10352	FBgn0030348	0.391442	-0.396314	0.308877	0.654133	0.879401	0.766767	0.662638	0.297415	#DIV/0!	#DIV/0!	#DIV/0!	#DIV/0!
CG15922	FBgn0040575	0.579437	0.582597	-0.149334	-0.0783239	-0.0168272	-0.0475755	0.662084	0.418898	#DIV/0!	#DIV/0!	#DIV/0!	#DIV/0!
CG17032	FBgn0036547	0.699355	0.53206	-0.084146	-0.0892131	-0.114768	-0.10199	0.660818	0.596754	-0.226271	-0.404901	-0.250764	-0.327832
Gasp	FBgn0026077	-0.53407	-0.37914	-0.154972	-0.0719269	-0.102461	-0.087194	0.658602	0.378017	0.0644504	-0.101645	0.165066	0.0317105
CG11035	FBgn0037544	0.608453	0.62296	-0.193009	-0.0317599	0.0189037	-0.0064281	0.658353	0.668871	-0.408605	-0.0345726	-0.251843	-0.143208
Ras85D	FBgn0003205	-0.0916572	-0.191387	0.00833544	-0.0235873	-0.00513211	-0.0143597	0.653392	0.211749	-0.578111	-2.21076	-1.79701	-2.00388
CG2065	FBgn0033204	0.0167467	0.107623	-0.187205	0.133398	-0.0164136	0.0584923	0.651066	0.897029	-0.0674667	-0.458982	-0.720421	-0.589701
CG7408	FBgn0036765	0.417787	0.306158	-0.103748	-0.0527798	0.0675583	0.00738927	0.648341	0.544998	0.271776	0.347397	0.189604	0.268501
CG17839	FBgn0036454	0.520003	0.421719	-0.127949	-0.0479372	-0.0485124	-0.0482248	0.648129	0.695261	0.419626	0.269812	0.0319785	0.150895
CG14502	FBgn0034321	0.393367	0.146	-0.233497	0.0359283	0.111419	0.0736739	0.646547	0.364847	#DIV/0!	#DIV/0!	#DIV/0!	#DIV/0!
Jheh1	FBgn0010053	0.403297	0.647817	-0.111674	-0.00819177	0.0511255	0.0214669	0.644714	0.757662	-0.0362031	0.101821	-0.0224927	0.0396641
fu12	FBgn0026718	0.233773	0.202055	0.131244	0.0602323	0.0727621	0.0664972	0.644625	0.703547	#DIV/0!	#DIV/0!	#DIV/0!	#DIV/0!
CG9377	FBgn0032507	0.895898	0.524223	-0.00506551	0.0699947	0.334755	0.202375	0.644349	0.597531	-0.0405774	0.0561657	0.167162	0.111664
CG10514	FBgn0039312	-0.0555145	-0.127464	-0.838654	-0.0511143	-0.27397	-0.162542	0.643702	0.283456	-0.902312	-0.7344	-0.292746	-0.513573
CG9249	FBgn0032922	0.867799	0.85911	-0.0872532	-0.102981	0.0160532	-0.0434637	0.638164	0.505467	0.351242	0.334047	0.434793	0.38442
CG33181	FBgn0053181	-0.272066	-0.208947	-0.207138	-0.057778	-0.0967303	-0.0772542	0.636057	0.550803	0.236548	-0.180844	-0.363228	-0.272036
CG8097	FBgn0030660	0.149492	0.18427	0.38445	0.0119099	-0.0377635	-0.0129268	0.632296	0.311396	#DIV/0!	#DIV/0!	#DIV/0!	#DIV/0!
Ncc69	FBgn0036279	0.360554	0.292877	0.0234818	0.037844	0.0473923	0.0426181	0.631121	0.740034	0.215288	0.194243	-0.241674	-0.0237155
CG11679	FBgn0030678	0.170985	-0.301372	0.0511535	0.00607269	0.205816	0.105944	0.628885	0.274216	0.321417	0.254408	-0.129576	0.0624157
CoIV	FBgn0032833	0.366061	0.391304	-0.227554	-0.131967	-0.123526	-0.127746	0.625362	0.4593	-0.216974	-0.124807	-0.234673	-0.17974
CG43129	FBgn0262599	-0.18393	0.0831405	-0.990901	-0.910726	-0.654568	-0.782647	0.624322	0.146889	-0.651851	-0.322908	-0.193933	-0.25842
CG31103	FBgn0051103	0.0301337	0.106396	-0.140819	-0.0711898	-0.0373973	-0.0542935	0.623799	0.633066	0.715108	0.404295	0.290146	0.34722
verm	FBgn0261341	-0.0498579	0.0886506	0.157063	-0.107914	-0.120731	-0.114322	0.620144	0.627477	-0.294181	-0.367259	-0.411633	-0.389446
Sfmbt	FBgn0032475	0.0129399	-0.212093	0.064348	-0.0146629	0.0902606	0.0377989	0.614681	0.299981	#DIV/0!	#DIV/0!	#DIV/0!	#DIV/0!
NaPi-T	FBgn0016684	0.093736	0.31811	-0.448527	0.110978	-0.0389321	0.0360229	0.611977	0.60616	#DIV/0!	#DIV/0!	#DIV/0!	#DIV/0!
CG16772	FBgn0032835	0.224593	0.419487	0.15663	0.0453073	-0.0189865	0.0131604	0.609806	0.4642	0.325838	-0.0499128	0.0595475	0.00481732
alpha-Est5	FBgn0261393	0.0678491	-0.216256	-0.164113	0.088891	0.216985	0.152938	0.609062	0.838347	-0.228442	0.377291	0.224443	0.300867
atilla	FBgn0032422	0.185903	0.255717	-0.0251454	-0.0102409	-0.0085831	-0.00941202	0.607479	0.543262	0.189989	-0.0857817	-0.263758	-0.17477
alpha-Est8	FBgn0015576	0.0783451	-0.00526373	-0.181338	-0.0635529	0.014518	-0.0245174	0.604945	0.527641	0.21253	0.122032	0.0342007	0.0781164
CG5973	FBgn0031914	-0.0312795	-0.00164881	-0.131089	-0.0105833	0.0198452	0.00463091	0.604379	0.740717	0.494249	0.251703	0.328018	0.289861
Ugt35a	FBgn0026315	0.144163	0.436562	-0.188192	-0.079271	-0.0285508	-0.0539109	0.60405	0.760895	0.289499	0.181528	-0.245248	-0.0318599
CG1315	FBgn0026565	0.313698	0.25104	-0.514117	0.110373	0.20742	0.158896	0.60362	0.835538	-0.457635	0.380481	0.517961	0.449221
CG11659	FBgn0038731	-0.0725436	-0.837293	-0.75326	0.087317	0.564733	0.326025	0.602165	0.311875	0.339402	1.05452	0.937665	0.99609
Nep2	FBgn0027570	0.283492	0.150617	0.0497037	-0.00972545	0.0012719	-0.00422678	0.599907	0.594417	0.186577	-0.0792991	-0.352641	-0.21597
LRP1	FBgn0053087	0.0547858	-0.146672	0.00446039	0.0792814	0.217347	0.148314	0.596806	0.472679	#DIV/0!	#DIV/0!	#DIV/0!	#DIV/0!
Surf1	FBgn0029117	0.879119	0.60111	0.153701	0.144792	0.270657	0.207724	0.596548	0.315582	0.0257716	0.179636	0.010018	0.094827
cype	FBgn0015031	0.401315	0.403947	-0.14552	-0.0206332	0.0120858	-0.0042737	0.595554	0.425101	-0.223959	-0.113497	-0.0789954	-0.096246
CG13565	FBgn0034935	0.0726097	0.000601655	-0.0764819	0.0734905	0.0868604	0.0801754	0.594113	0.0137191	-0.753485	-0.222743	-0.0617408	-0.142242
clt	FBgn0000326	0.0524379	-0.0754531	-0.105123	-0.0785149	0.0292887	-0.0246131	0.591538	0.426348	#DIV/0!	#DIV/0!	#DIV/0!	#DIV/0!
CG3842	FBgn0029866	0.162319	-0.0472915	-0.170079	-0.0908937	-0.0254413	-0.0581675	0.591509	0.629059	0.224316	0.27787	-0.092152	0.092859
CG9634	FBgn0027528	0.839313	0.486627	-0.0836398	-0.0433456	0.00663144	-0.0183571	0.586127	0.758524	-0.0291321	0.0954448	-0.312687	-0.108621
PKD	FBgn0038603	0.438018	0.343184	-0.072409	-0.0148621	-0.00872519	-0.0117936	0.582698	0.470217	#DIV/0!	#DIV/0!	#DIV/0!	#DIV/0!
CG8788	FBgn0028955	0.220766	0.233413	0.00247417	0.0683412	0.0884264	0.0783838	0.582669	0.411818	#DIV/0!	#DIV/0!	#DIV/0!	#DIV/0!
Mal-A3	FBgn0002571	-0.717994	0.381994	-0.907252	0.340946	-0.102527	0.11921	0.580421	0.777773	-1.11344	-0.534833	-0.589198	-0.562016
CG34026	FBgn0054026	0.601259	-0.60007	-0.267128	-0.051996	0.0801504	0.0140772	0.579058	-0.16832	0.158061	0.586038	0.655928	0.620983
CG4210	FBgn0038302	-0.116135	-0.585506	0.110999	0.0292807	0.213816	0.121549	0.576638	0.0461732	-0.0926522	-0.0587729	0.0277985	-0.0154872
CheA7a	FBgn0029948	0.0857175	0.25845	-0.220985	-0.000975551	-0.018879	-0.00992727	0.575976	0.853374	0.301529	0.127016	0.193732	0.160374
CG33056	FBgn0053056	0.0795543	-0.010071	-0.259863	-0.123015	-0.136698	-0.129856	0.575694	0.385647	0.124226	-0.0351326	-0.0103761	-0.0227543
CG6830	FBgn0037934	0.872376	0.600659	-0.480285	0.0135729	-0.0397804	-0.0131037	0.575069	0.830839	-0.146876	0.0923125	-0.136976	-0.0223318
mRpS14	FBgn0044030	0.233823	0.0607948	-0.174974	-0.120105	-0.106421	-0.113263	0.573786	0.789795	#DIV/0!	#DIV/0!	#DIV/0!	#DIV/0!
Cyp311a1	FBgn0030367	0.373663	0.268966	-0.151617	0.0597719	0.0892597	0.0745158	0.571507	0.604915	#DIV/0!	#DIV/0!	#DIV/0!	#DIV/0!
CG18135	FBgn0036837	0.205233	0.0823665	-0.0109199	0.0484328	0.110067	0.0792498	0.571184	0.264047	0.490148	-0.163315	0.342821	0.0897531
Jon74E	FBgn0023197	0.957956	0.396108	-0.614038	-0.21307	-0.13039	-0.17173	0.569656	0.691946	-0.32736	0.280741	-0.599689	-0.159474
Ugt35b	FBgn0026314	-0.0805491	0.16615	-0.418229	-0.0267182	-0.153072	-0.0898953	0.564122	0.688373	-0.767016	-0.254712	-0.636865	-0.445789
CoVa	FBgn0019624	0.176732	0.43217	-0.220472	-0.153777	-0.169665	-0.161721	0.56007	0.394562	-0.150664	0.0574627	0.121808	0.0896353
Oatp58Db	FBgn0034715	-0.328079	-0.205213	-0.577088	0.135572	-0.120898	0.00733731	0.559611	0.432511	#DIV/0!	#DIV/0!	#DIV/0!	#DIV/0!
CG13133	FBgn0032181	0.140953	0.139062	-0.168715	-0.181781	-0.0335695	-0.107675	0.55924	0.62815	#DIV/0!	#DIV/0!	#DIV/0!	#DIV/0!
PebIII	FBgn0011695	0.00615723	-0.276289	-0.000260688	0.0262293	0.0802475	0.0532384	0.556779	0.44219	-0.151256	-0.113174	0.238441	0.0626335
CG31522	FBgn0051522	0.243473	-0.408544	-0.0794715	-0.06165	-0.00897422	-0.0353121	0.555476	0.231253	#DIV/0!	#DIV/0!	#DIV/0!	#DIV/0!
nompA	FBgn0016047	0.108315	-0.580431	-0.122772	-0.0246123	0.43725	0.206319	0.554183	0.473676	0.575848	0.828422	0.626453	0.727438
CAH2	FBgn0027843	0.685691	0.351551	-0.0355898	0.00482337	0.0151224	0.00997287	0.551099	0.212305	0.3456	0.454005	0.171933	0.312969
CG1646	FBgn0039600	0.0472358	0.0735931	-0.013212	-0.0113049	-0.00675871	-0.00903178	0.549038	0.725966	-0.108161	1.43825	1.26776	1.35301
l(2)34Fc	FBgn0261534	0.322738	0.362676	-0.165707	-0.0814986	-0.0595973	-0.0705479	0.544993	0.525202	-0.497081	-0.30283	-0.0176808	-0.160255
Aldh-III	FBgn0010548	0.449513	0.345968	-0.165012	-0.0534329	-0.0228952	-0.0381641	0.544086	0.517128	0.137365	0.120895	0.00624721	0.0635712
CG1814	FBgn0033426	0.591372	0.540448	-0.0278336	-0.0599706	-0.0751524	-0.0675615	0.542894	0.393948	0.18077	0.281543	0.369761	0.325652
l(3)neo43	FBgn0011476	0.54596	0.661183	-0.222458	-0.0916065	-0.0307818	-0.0611942	0.542327	0.764476	-0.302935	0.164477	0.284459	0.224468
CG7203	FBgn0031942	0.414053	0.935203	-0.641842	-0.326436	-0.682086	-0.504261	0.542138	0.673742	0.421705	0.662662	0.458695	0.560678
CG33301	FBgn0053301	0.544027	-0.0238587	-0.424855	0.0640157	0.163285	0.11365	0.538454	0.186742	-0.815536	0.13327	0.376319	0.254794
CG11784	FBgn0033381	0.989987	0.78914	-0.345134	-0.463225	-0.381724	-0.422474	0.537698	0.319497	-0.290584	-0.203857	-0.0469281	-0.125393
CG17278	FBgn0046763	0.240743	0.388272	0.00310352	-0.168036	-0.0831224	-0.125579	0.537507	0.41233	0.744886	0.346443	0.497459	0.421951
CG5065	FBgn0034145	0.721815	0.0344501	0.0448624	-0.105274	0.039798	-0.0327381	0.536908	0.459941	0.438369	0.786473	-0.229291	0.278591
CG34445	FBgn0085474	0.157071	-0.40681	-0.343709	-0.217334	0.093886	-0.0617241	0.536877	0.351391	#DIV/0!	#DIV/0!	#DIV/0!	#DIV/0!
CG12512	FBgn0031703	-0.012635	-0.334944	-0.254519	-0.0301103	0.0110308	-0.00953975	0.536842	0.378007	-0.0686642	0.0758221	0.390234	0.233028
CG31673	FBgn0051673	0.12847	-0.028725	0.0487012	0.0510799	0.0917878	0.0714339	0.535458	0.296108	-0.202647	-0.117578	-0.0478928	-0.0827353
CG1443	FBgn0039620	0.680928	0.120094	0.0313832	-0.086583	-0.00245978	-0.0445214	0.534641	0.324063	#DIV/0!	#DIV/0!	#DIV/0!	#DIV/0!
CG7630	FBgn0040793	0.326653	0.439361	-0.212577	-0.138965	-0.13959	-0.139277	0.534528	0.370149	0.202257	0.391065	0.384538	0.387801
mgl	FBgn0261260	-0.0536391	-0.184073	0.0981716	0.101587	0.074743	0.0881649	0.530189	0.604447	-0.0417177	-0.0862708	-0.388267	-0.237269
Cyp9b2	FBgn0015039	0.268317	0.33391	-0.165111	0.0127967	0.0597939	0.0362953	0.529307	0.485079	-0.332988	0.0325203	-0.281801	-0.12464
CG9581	FBgn0031093	0.477958	0.55353	0.135592	0.069575	0.114505	0.0920399	0.528449	0.579376	0.0231278	-0.102045	-0.142419	-0.122232
CG3631	FBgn0038268	0.0598063	-0.36224	-0.105573	-0.220807	0.187842	-0.0164829	0.528015	0.434597	0.0868023	-0.259966	-0.199803	-0.229885
CG33523	FBgn0053523	0.200907	0.22799	-0.125639	-0.0477859	-0.0311499	-0.0394679	0.526361	0.620558	-0.0919828	-0.0316818	-0.450666	-0.241174
CoVb	FBgn0031830	0.234889	0.2939	-0.206286	-0.149687	-0.12871	-0.139198	0.525721	0.34298	-0.217574	-0.0308976	0.0713859	0.0202441
CG10560	FBgn0039325	0.045658	-0.155489	-0.275547	-0.0497494	-0.147173	-0.0984613	0.525684	-0.289324	-0.833868	-0.419997	0.075479	-0.172259
CG1774	FBgn0039856	0.762049	0.572385	-0.213383	-0.135917	-0.187826	-0.161872	0.525668	0.241734	-0.055719	0.178599	0.0546443	0.116622
Dms	FBgn0011581	0.0524671	0.478418	0.203459	0.464111	-0.0370448	0.213533	0.523852	0.76566	#DIV/0!	#DIV/0!	#DIV/0!	#DIV/0!
CG18540	FBgn0034326	0.267754	0.233465	-0.338515	-0.0585908	-0.0369313	-0.047761	0.523609	0.407376	#DIV/0!	#DIV/0!	#DIV/0!	#DIV/0!
obst-B	FBgn0027600	0.102478	0.635078	-0.162461	-0.161476	-0.0675228	-0.1145	0.523559	0.691281	#DIV/0!	#DIV/0!	#DIV/0!	#DIV/0!
CG4942	FBgn0035960	0.321569	0.221835	-0.183657	-0.332989	-0.277573	-0.305281	0.521931	0.452587	#DIV/0!	#DIV/0!	#DIV/0!	#DIV/0!
Cyp6a18	FBgn0039519	0.00169881	0.0239795	-0.509207	0.192566	0.0727514	0.132659	0.521814	0.492993	0.568978	-0.041015	0.229938	0.0944616
Tsf1	FBgn0022355	0.697657	0.316194	0.112651	0.0418797	0.0866941	0.0642869	0.519097	0.426111	0.439723	0.1576	0.568967	0.363284
CG5783	FBgn0032670	0.242535	-0.0142656	0.0414206	-0.0193584	0.0630695	0.0218556	0.518557	0.339842	0.169267	0.0823786	-0.0417431	0.0203177
CG32230	FBgn0052230	0.161277	0.1842	-0.319936	-0.203482	-0.179356	-0.191419	0.518293	0.332383	-0.259102	-0.0655753	-0.0668152	-0.0661953
Ucp4A	FBgn0030872	0.669095	0.551423	-0.254099	-0.243356	-0.238214	-0.240785	0.518274	0.20512	0.0307662	-0.198656	-0.450435	-0.324546
Cyp6t1	FBgn0031182	0.432802	-0.25643	-0.920956	-0.195626	0.100226	-0.0477002	0.51702	0.313941	-0.371697	-1.15246	-0.827298	-0.989882
Gdh	FBgn0001098	-0.921339	-0.723169	-0.40688	-0.199329	-0.280829	-0.240079	0.516597	0.540007	#DIV/0!	#DIV/0!	#DIV/0!	#DIV/0!
alpha-Est1	FBgn0015568	0.0365445	0.0299999	-0.187691	0.00392684	0.0406122	0.0222695	0.516477	0.618282	0.214138	0.360541	0.267925	0.314233
CG31313	FBgn0051313	0.407997	0.243542	0.0321661	0.00710702	0.0847807	0.0459438	0.514143	0.218991	-0.254043	-0.198502	-0.000743942	-0.0996231
RpS30	FBgn0038834	-0.108212	-0.0508285	0.0280271	0.0738216	0.0790205	0.0764211	0.513596	-0.085458	-1.09702	-1.24577	-0.535071	-0.890422
Wbp2	FBgn0036318	0.0743751	-0.0331577	0.222623	0.0664493	0.0657166	0.0660829	0.513558	0.24277	0.382411	-0.221218	-0.00290101	-0.112059
CG14528	FBgn0039611	0.328429	0.640921	0.0346683	0.0389941	0.0942629	0.0666285	0.513187	0.326366	0.47546	0.194675	0.182239	0.188457
CG7777	FBgn0033635	0.189451	-0.450787	0.0871611	-0.0205885	0.0422696	0.0108405	0.51262	0.0476333	#DIV/0!	#DIV/0!	#DIV/0!	#DIV/0!
CG17027	FBgn0036553	0.186789	0.00301302	-0.232283	-0.020226	-0.0581618	-0.0391939	0.511516	0.421173	-0.309672	-0.214712	0.0821816	-0.066265
CG33120	FBgn0053120	-0.723565	-0.704812	0.0600083	0.0976713	0.243667	0.170669	0.510554	0.384486	#DIV/0!	#DIV/0!	#DIV/0!	#DIV/0!
CG3815	FBgn0029861	-0.180865	-0.487276	0.183032	0.162711	0.316723	0.239717	0.510319	0.350742	#DIV/0!	#DIV/0!	#DIV/0!	#DIV/0!
CG8317	FBgn0034140	0.784056	0.00710515	0.148869	0.117908	0.248403	0.183156	0.510317	-0.270223	#DIV/0!	#DIV/0!	#DIV/0!	#DIV/0!
CG4598	FBgn0032160	0.108847	-0.265485	-0.0267037	0.027699	0.116806	0.0722526	0.509434	0.176166	-0.0347055	0.0380089	0.108315	0.0731619
CG9519	FBgn0030589	0.573517	0.0824528	0.0210406	0.113767	0.18728	0.150523	0.508126	0.311357	0.550138	0.365812	0.0677161	0.216764
CG4962	FBgn0036597	0.112354	-0.404013	-1.25607	-0.666882	-0.68702	-0.676951	0.508069	0.631031	-0.0345594	0.0363105	0.0834564	0.0598835
CG12263	FBgn0034346	-0.159329	-0.459459	0.140405	-0.0103721	0.267853	0.12874	0.506236	0.0435736	#DIV/0!	#DIV/0!	#DIV/0!	#DIV/0!
mRpS18C	FBgn0039765	-0.0334439	-0.146549	-0.0643086	-0.0159973	0.0236771	0.00383993	0.505377	0.694371	#DIV/0!	#DIV/0!	#DIV/0!	#DIV/0!
CG7172	FBgn0037102	0.131162	0.11748	-0.101774	-0.0433391	0.0164288	-0.0134551	0.501258	0.807117	-0.39318	-0.154529	0.182084	0.0137774
CG4433	FBgn0038763	0.552497	0.52846	-0.141652	-0.221809	-0.24195	-0.23188	0.500049	0.194061	0.424784	0.00574808	-0.0701949	-0.0322234
CheB42a	FBgn0053348	0.387827	0.0229228	-0.18526	0.0340248	0.0750039	0.0545143	0.498551	0.399382	0.585657	0.244035	0.216209	0.230122
Cyp9f2	FBgn0038037	0.294373	0.100285	-0.0817795	0.0383144	0.0473411	0.0428278	0.494783	0.349798	-0.179552	0.0480128	-0.398566	-0.175276
Cda5	FBgn0051973	0.485744	0.55577	-0.301455	-0.160698	-0.224685	-0.192691	0.494411	0.907122	0.0680186	-0.738954	-0.92869	-0.833822
CG7322	FBgn0030968	0.259141	-0.0207775	-0.15605	0.0312865	0.111302	0.0712944	0.492182	0.514988	-0.137487	0.0712381	0.316092	0.193665
CG5590	FBgn0039537	0.073318	-0.0181717	-0.0439882	0.0521195	0.0898843	0.0710019	0.492012	0.391762	-0.0328786	0.127843	0.283621	0.205732
CG8192	FBgn0034030	-0.290765	-0.918899	0.0195705	-0.0501445	0.420245	0.18505	0.489241	0.827134	#DIV/0!	#DIV/0!	#DIV/0!	#DIV/0!
mRpS21	FBgn0044511	0.0196568	-0.0330171	-0.0897408	0.00734683	0.0388975	0.0231222	0.489174	0.774501	#DIV/0!	#DIV/0!	#DIV/0!	#DIV/0!
Ugt86Da	FBgn0040259	0.06001	0.1268	-0.0841787	-0.00298624	-0.00425517	-0.0036207	0.488761	0.438317	0.179376	0.305908	-0.326505	-0.0102986
CG7966	FBgn0038115	0.408582	0.151696	-0.0790734	0.0203522	0.108454	0.0644029	0.483039	0.507518	0.128054	0.0284778	0.209321	0.118899
sinu	FBgn0010894	-0.0741147	-0.102928	0.069576	0.020395	0.0219425	0.0211688	0.48255	0.452543	#DIV/0!	#DIV/0!	#DIV/0!	#DIV/0!
CG8078	FBgn0033375	-0.107717	-0.440783	0.0932761	0.0956974	0.288923	0.19231	0.4821	-0.026996	#DIV/0!	#DIV/0!	#DIV/0!	#DIV/0!
kune	FBgn0033032	-0.0636059	-0.0567965	0.0385581	0.0138093	0.0448825	0.0293459	0.480002	0.386664	#DIV/0!	#DIV/0!	#DIV/0!	#DIV/0!
CG3939	FBgn0040396	0.744514	0.533329	-0.0755031	-0.00755243	0.00300171	-0.00227536	0.479818	0.588766	-0.0992283	0.236517	0.289502	0.26301
CG15456	FBgn0040650	0.967834	0.640597	-0.208837	-0.208476	-0.132007	-0.170242	0.47885	0.340112	0.712507	0.705504	0.65365	0.679577
mRpL27	FBgn0053002	0.251764	0.314023	-0.209237	-0.113343	-0.0915302	-0.102437	0.476671	0.75059	#DIV/0!	#DIV/0!	#DIV/0!	#DIV/0!
CheB38c	FBgn0032888	-0.00908589	0.333456	-0.498754	-0.220042	-0.140616	-0.180329	0.476477	0.926311	#DIV/0!	#DIV/0!	#DIV/0!	#DIV/0!
Cyp4g15	FBgn0030304	0.134027	-0.0820647	-0.0548598	0.00588452	0.0203973	0.0131409	0.476352	0.414718	-1.15448	-1.64517	-1.57781	-1.61149
Gclm	FBgn0046114	0.66573	0.59904	0.0301514	0.05482	0.0312843	0.0430521	0.47543	0.667183	0.126893	0.141423	0.186787	0.164105
CG6045	FBgn0038349	0.416399	0.100173	0.00847318	0.0543447	0.0823981	0.0683714	0.474172	0.311003	-0.0569134	0.308118	0.29255	0.300334
Smg6	FBgn0039260	-0.0180273	-0.112215	0.19771	0.00529142	0.0354965	0.0203939	0.474092	0.259564	0.153409	-0.464744	-0.228105	-0.346425
CG18624	FBgn0029971	0.381353	0.40312	-0.114951	-0.031181	-0.0284283	-0.0298046	0.473997	0.104638	0.0646185	-0.308834	-0.211712	-0.260273
CoVIb	FBgn0031066	0.396188	0.514298	-0.199587	-0.18167	-0.220089	-0.20088	0.472379	0.248887	-0.177478	0.0356904	0.180722	0.108206
CG9399	FBgn0037715	0.337456	0.313808	-0.300496	-0.228773	-0.261481	-0.245127	0.471634	0.291749	-0.265841	-0.333879	-0.415052	-0.374466
Cpr73D	FBgn0036680	0.347989	0.044346	-0.339087	-0.244381	-0.119878	-0.182129	0.471395	0.497321	0.872236	0.675069	0.497282	0.586176
Galk	FBgn0263199	0.490859	0.00107292	0.0175205	0.117102	0.213525	0.165314	0.470158	0.714633	0.0219964	0.0697822	0.170365	0.120074
pyd3	FBgn0037513	0.556311	0.638283	-0.115448	-0.0160913	0.0393511	0.0116299	0.469975	0.886055	-0.0815341	0.0102667	0.0650168	0.0376417
Pbprp5	FBgn0011283	-0.366071	-0.040154	0.51741	0.474812	0.520179	0.497496	0.46997	-0.0566803	#DIV/0!	#DIV/0!	#DIV/0!	#DIV/0!
CG7903	FBgn0039730	0.470575	0.392128	0.0947961	0.0147573	0.0413091	0.0280332	0.46966	0.404858	-0.476618	-0.577639	-0.561903	-0.569771
w	FBgn0003996	-0.268953	-0.363314	-0.605702	0.139792	0.0246347	0.0822134	0.467644	-0.0464431	#DIV/0!	#DIV/0!	#DIV/0!	#DIV/0!
Cyp6a21	FBgn0033981	0.387422	0.557727	-0.420036	-0.135726	-0.0822735	-0.109	0.467529	0.85838	-0.0270388	-0.582746	-0.731465	-0.657106
CG1636	FBgn0030030	0.488516	0.570261	-0.121418	-0.113663	-0.143294	-0.128479	0.467174	0.273622	#DIV/0!	#DIV/0!	#DIV/0!	#DIV/0!
mRpL13	FBgn0032720	0.217303	0.166405	-0.0460705	0.0330443	0.0913857	0.062215	0.466813	0.893525	#DIV/0!	#DIV/0!	#DIV/0!	#DIV/0!
MRP	FBgn0032456	0.0488371	-0.00598037	-0.0489535	0.069891	0.0869849	0.078438	0.464183	0.29347	#DIV/0!	#DIV/0!	#DIV/0!	#DIV/0!
Ugt	FBgn0014075	0.145932	-0.0870306	0.150333	0.0368259	0.121713	0.0792692	0.463831	0.43825	-0.0388667	0.0742013	0.0423602	0.0582808
CG31674	FBgn0051674	0.92757	0.986954	-0.151817	0.0307455	0.129025	0.0798855	0.462478	0.457523	-0.106382	0.438261	0.752395	0.595328
CG14613	FBgn0031188	0.338049	0.41512	0.100547	0.0266383	0.0106485	0.0186434	0.461158	0.334669	#DIV/0!	#DIV/0!	#DIV/0!	#DIV/0!
CG8336	FBgn0036020	0.168643	0.261426	0.133016	-0.0238082	0.023927	5.9425e-05	0.460971	0.44833	#DIV/0!	#DIV/0!	#DIV/0!	#DIV/0!
CG3739	FBgn0038702	0.935474	0.470222	-0.588425	0.0021558	0.120857	0.0615065	0.460342	0.584877	#DIV/0!	#DIV/0!	#DIV/0!	#DIV/0!
sas	FBgn0002306	0.0844597	0.0757351	0.0142789	-0.0929878	0.00311349	-0.0449372	0.460125	0.540492	#DIV/0!	#DIV/0!	#DIV/0!	#DIV/0!
BI-1	FBgn0035871	0.0299794	-0.0347216	0.186667	0.00379277	0.0326036	0.0181982	0.460124	0.734361	#DIV/0!	#DIV/0!	#DIV/0!	#DIV/0!
yellow-d2	FBgn0034856	-0.343126	-0.928767	0.177559	0.0139252	0.640534	0.32723	0.459497	0.835896	#DIV/0!	#DIV/0!	#DIV/0!	#DIV/0!
alpha-Man-IIb	FBgn0026616	0.0957407	0.104633	-0.158456	-0.072224	-0.0831112	-0.0776676	0.459477	0.438005	#DIV/0!	#DIV/0!	#DIV/0!	#DIV/0!
CG34327	FBgn0085356	0.362951	-0.136701	-3.05236	-3.18244	-2.07471	-2.62857	0.456251	0.505847	#DIV/0!	#DIV/0!	#DIV/0!	#DIV/0!
CG18508	FBgn0028746	0.299151	0.0722122	-0.0527207	-0.0751338	-0.035211	-0.0551724	0.456199	0.208569	0.436781	0.102824	0.151747	0.127286
CG6429	FBgn0046999	0.50214	0.427653	0.0740632	-0.0216466	0.010764	-0.00544126	0.45541	0.119833	#DIV/0!	#DIV/0!	#DIV/0!	#DIV/0!
l(2)k12914	FBgn0263852	0.0549074	-0.176893	0.175594	0.0312824	0.128013	0.0796476	0.45525	0.411914	-0.012598	-0.155967	-0.413588	-0.284777
CG30339	FBgn0050339	0.247562	0.115568	-0.0903837	-0.046678	0.070228	0.011775	0.454481	0.84747	#DIV/0!	#DIV/0!	#DIV/0!	#DIV/0!
gce	FBgn0261703	0.0531252	0.019251	-0.195571	-0.0624138	-0.0784395	-0.0704266	0.453414	0.520428	#DIV/0!	#DIV/0!	#DIV/0!	#DIV/0!
l(3)87Df	FBgn0002354	0.681807	0.488039	-0.192581	-0.107435	-0.0160935	-0.0617644	0.452999	0.370535	-0.31251	-0.110124	-0.371045	-0.240585
Ance-4	FBgn0033366	-0.152501	-0.213395	-0.0530194	0.0649153	0.0850052	0.0749603	0.452266	0.000873273	0.143206	0.122791	0.00782083	0.0653057
CG11897	FBgn0039644	-0.560872	-0.728035	0.0257578	0.106548	0.115993	0.111271	0.449777	0.132628	-0.107525	-0.518247	-0.627135	-0.572691
CG32163	FBgn0052163	0.326484	0.174302	0.134829	0.10259	0.179793	0.141191	0.448664	0.16082	#DIV/0!	#DIV/0!	#DIV/0!	#DIV/0!
spz3	FBgn0031959	-0.369845	-0.434976	-0.176328	-0.0289149	0.12065	0.0458677	0.448097	0.390867	#DIV/0!	#DIV/0!	#DIV/0!	#DIV/0!
CG17108	FBgn0032285	0.166804	-0.177971	0.00894091	0.0500048	0.0571039	0.0535544	0.44786	0.00190867	1.10647	0.290609	0.3406	0.315604
e	FBgn0000527	-0.435391	-0.345982	-0.177431	-0.156754	-0.206652	-0.181703	0.447707	0.504116	-0.468897	0.0247133	-0.301289	-0.138288
CG33521	FBgn0250819	-0.076152	-0.116381	-0.33544	-0.346183	-0.347153	-0.346668	0.447674	-0.0591505	-0.691041	-0.449945	-0.723184	-0.586565
Cpr100A	FBgn0039805	0.349454	0.431369	-0.631882	-0.306063	-0.298152	-0.302107	0.44757	0.45252	-0.550897	-0.631581	-1.10452	-0.86805
CG17221	FBgn0031500	0.379052	0.349099	0.148953	0.136876	0.196996	0.166936	0.446994	0.349267	0.476809	0.324609	0.269425	0.297017
mRpS7	FBgn0032236	0.278016	0.339877	-0.0926875	0.0914419	0.147749	0.119596	0.446931	0.675851	-0.821191	-0.686477	-0.566598	-0.626537
Cyp6a22	FBgn0013773	0.0420283	-0.150467	-0.0166674	0.0737333	0.225723	0.149728	0.446143	0.242831	#DIV/0!	#DIV/0!	#DIV/0!	#DIV/0!
CG42235	FBgn0250757	0.0139531	0.0711875	-0.414731	0.0162385	-0.104798	-0.0442798	0.446111	0.423302	#DIV/0!	#DIV/0!	#DIV/0!	#DIV/0!
Mipp1	FBgn0026061	0.183358	0.0416558	-0.355971	-0.101997	-0.128308	-0.115153	0.445877	0.232211	-0.0362874	-0.0404587	-0.161002	-0.10073
Cyp9b1	FBgn0015038	0.0688929	-0.0128944	0.0803808	0.0404784	0.184771	0.112625	0.445586	0.104432	-0.436029	0.00344147	-0.0433809	-0.0199697
CG2604	FBgn0037298	0.0298171	-0.102496	-0.074984	-0.0235183	-0.00346498	-0.0134917	0.445444	0.469901	0.0973146	0.0319774	-0.102753	-0.0353879
CG14259	FBgn0039483	0.673347	0.431222	-0.252323	-0.0752932	-0.0577724	-0.0665328	0.445167	0.172791	-0.259648	-0.0244319	0.132471	0.0540196
CG12269	FBgn0038665	0.602741	0.197738	-0.109563	-0.070641	-0.159516	-0.115078	0.444751	0.245251	-0.149339	0.0986344	-0.0953361	0.00164913
Ugt86Dd	FBgn0040256	0.803398	0.417754	-0.109422	0.0160202	0.0582693	0.0371448	0.444652	0.402758	-0.232874	0.140326	0.0844453	0.112385
Est-Q	FBgn0037090	0.142408	0.167069	-0.195267	0.061697	0.137923	0.09981	0.443486	0.14066	#DIV/0!	#DIV/0!	#DIV/0!	#DIV/0!
CG14290	FBgn0038662	0.535782	0.851788	-0.149998	-0.168909	-0.177949	-0.173429	0.442964	0.25489	-0.513543	-0.445829	-0.420831	-0.43333
CG5945	FBgn0032494	0.175757	0.0552733	-0.147518	-0.016112	-0.00156931	-0.00884066	0.442936	0.200137	-0.0419142	0.145367	0.481141	0.313254
OstStt3	FBgn0011336	0.0963221	0.0463241	0.079499	0.0251092	0.0680916	0.0466004	0.44159	0.303616	0.038999	0.106392	-0.16755	-0.0305793
pck	FBgn0013720	0.00522524	-0.110727	0.0419749	-0.0295484	0.0539241	0.0121879	0.44058	0.41031	#DIV/0!	#DIV/0!	#DIV/0!	#DIV/0!
Cyp317a1	FBgn0033982	-0.433653	-0.4684	-0.11071	0.0309379	0.103469	0.0672035	0.440553	0.265516	#DIV/0!	#DIV/0!	#DIV/0!	#DIV/0!
Cyp28d1	FBgn0031689	0.671517	0.61794	-0.0662311	0.0222216	0.130993	0.0766072	0.440514	0.268561	-0.177762	0.016616	-0.0278339	-0.00560893
Cyt-b5-r	FBgn0000406	0.0903011	0.0984304	0.0906245	0.126168	0.147228	0.136698	0.439132	0.317373	0.259869	-0.00515615	-0.0755445	-0.0403503
tst	FBgn0039117	0.446539	0.23904	0.184216	-0.00334258	0.262135	0.129396	0.438906	0.593039	-0.118909	0.121438	0.0690086	0.0952232
mRpS23	FBgn0260407	0.244263	0.167771	0.11431	0.162559	0.260475	0.211517	0.438772	0.762283	-1.00147	-0.33856	-0.198667	-0.268614
CG34242	FBgn0085271	-0.117166	-0.177786	-0.173704	-0.0796598	0.0276093	-0.0260253	0.438752	-0.0813342	-0.0309587	0.233237	0.71999	0.476614
yellow-h	FBgn0039896	0.618306	-0.0410403	-0.0546025	-0.0670533	0.0835219	0.00823431	0.438555	0.47168	0.194751	0.0413891	-0.223805	-0.0912082
CG4882	FBgn0025336	0.254563	0.342687	0.241191	0.0862099	0.127652	0.106931	0.436856	0.83198	-1.01717	-0.735614	-0.736653	-0.736133
CG6662	FBgn0035907	0.538977	0.521204	0.0824242	0.0195283	0.0749649	0.0472466	0.436677	0.419883	0.0639411	0.212663	0.263137	0.2379
CG12848	FBgn0040666	0.0829407	0.0111564	-0.0780207	-0.115346	-0.0546554	-0.0850007	0.435395	0.794278	-0.692183	-0.653811	-0.568923	-0.611367
etaTry	FBgn0011554	0.298963	-0.0976076	-0.348146	0.128419	0.199614	0.164017	0.432909	0.72201	#DIV/0!	#DIV/0!	#DIV/0!	#DIV/0!
Ance	FBgn0012037	0.413827	0.232449	-0.216729	0.0247382	-0.0246954	2.13916e-05	0.432642	0.0459063	0.239042	0.40384	0.419709	0.411775
CG14439	FBgn0029898	0.276659	0.0976402	-0.169072	-0.100019	-0.0713398	-0.0856795	0.432288	0.415934	0.132511	-0.0655968	-0.247967	-0.156782
CG4960	FBgn0039371	0.312525	0.828166	0.231366	-0.200315	-2.74298	-1.47165	0.431499	0.526856	0.795265	0.142128	-0.427616	-0.142744
Hydr1	FBgn0033382	0.514703	0.279629	-0.134162	-0.00744289	-0.0364736	-0.0219582	0.43137	0.229758	-0.325461	-0.189002	-0.63815	-0.413576
MFS3	FBgn0031307	-0.120108	-0.718323	0.602114	0.24543	0.918438	0.581934	0.431037	0.395654	#DIV/0!	#DIV/0!	#DIV/0!	#DIV/0!
Nop17l	FBgn0033224	0.480419	0.493613	0.0943875	0.0088626	0.0464577	0.0276602	0.426957	0.390293	#DIV/0!	#DIV/0!	#DIV/0!	#DIV/0!
Vps16B	FBgn0039702	0.141527	-0.545638	-0.0127696	-0.0341543	0.175815	0.0708304	0.426452	0.154519	#DIV/0!	#DIV/0!	#DIV/0!	#DIV/0!
Nplp3	FBgn0042201	-0.220637	0.64337	-0.827395	-0.374616	-0.749915	-0.562265	0.42572	0.523393	#DIV/0!	#DIV/0!	#DIV/0!	#DIV/0!
CG5792	FBgn0032455	0.0532357	0.0220902	0.0465563	-0.0258484	0.0312935	0.00272257	0.425704	0.437292	0.101818	-0.0616499	0.00155841	-0.0300457
bonsai	FBgn0026261	0.22851	0.261213	-0.0728508	0.00128103	0.0193629	0.010322	0.421829	0.668807	-0.836173	-0.676973	-0.468259	-0.572616
CG12119	FBgn0030102	0.54401	0.584728	-0.109839	-0.0938085	-0.161964	-0.127886	0.421709	0.556811	0.501706	0.405668	0.320606	0.363137
CG16749	FBgn0037678	-0.1474	0.269292	-0.979307	0.0419471	-0.20734	-0.0826964	0.421489	0.932344	#DIV/0!	#DIV/0!	#DIV/0!	#DIV/0!
Kdm2	FBgn0037659	-0.0271987	-0.172993	0.0194697	-0.0208731	0.0330052	0.00606605	0.420673	0.0582415	#DIV/0!	0.20323	0.15946	0.181345
l(2)not	FBgn0011297	0.339207	-0.427634	0.17771	0.117986	0.380627	0.249307	0.420431	0.442057	#DIV/0!	#DIV/0!	#DIV/0!	#DIV/0!
Cyp309a1	FBgn0031432	0.491527	0.155002	-0.0873581	0.0199866	0.17606	0.0980232	0.420029	0.508818	0.0220653	-0.201692	-0.237542	-0.219617
Mgstl	FBgn0025814	0.410969	0.599921	-0.075432	-0.0160434	0.0370552	0.0105059	0.419647	0.844109	0.0321034	-0.112359	-0.299648	-0.206003
mRpS22	FBgn0039555	-0.0259766	-0.0317966	0.255898	0.308001	0.350792	0.329396	0.41945	0.61002	-0.49797	-0.56438	-0.38975	-0.477065
rad50	FBgn0034728	0.0970359	-0.164706	0.504151	0.32348	0.521566	0.422523	0.419066	0.243176	1.22867	0.839643	0.955372	0.897508
mRpS18B	FBgn0032849	0.0976042	-0.0935167	0.189517	0.226863	0.320311	0.273587	0.418743	0.600482	-0.634608	-0.566904	-0.285229	-0.426066
CG10562	FBgn0039326	0.125277	0.258586	-0.210563	-0.0347557	0.022347	-0.00620438	0.417795	0.540562	-0.120645	0.319426	0.114507	0.216967
Aph-4	FBgn0016123	0.0961787	0.622795	-0.24592	0.06959	-0.114573	-0.0224916	0.416858	0.126395	-0.590095	-0.0591188	0.373308	0.157095
mRpL39	FBgn0036462	0.233407	-0.35388	0.0576236	0.0350211	0.109182	0.0721016	0.416711	0.989073	-0.372323	-0.438686	-0.651425	-0.545055
CG12056	FBgn0030099	0.196732	-0.0269374	-0.0417752	-0.0512272	0.0976002	0.0231865	0.416028	0.287634	0.0544115	-0.13929	-0.205766	-0.172528
CG8814	FBgn0031478	0.387713	0.441397	-0.0757176	-0.0369038	0.0127282	-0.0120878	0.41534	0.703003	0.0393339	-0.0619973	-0.448047	-0.255022
CheB93a	FBgn0038888	0.145264	-0.0351523	-0.257355	-0.0235826	-0.036776	-0.0301793	0.414495	0.298537	#DIV/0!	#DIV/0!	#DIV/0!	#DIV/0!
Dot	FBgn0015663	0.416816	-0.0415661	0.100472	-0.0418478	0.130001	0.0440767	0.413606	-0.395959	0.144151	0.0849825	-0.44128	-0.178149
Cpr47Ef	FBgn0033603	-0.231452	-0.499985	0.0948011	-0.103056	-0.188062	-0.145559	0.413537	0.38535	0.982201	0.542786	0.223323	0.383055
Prosap	FBgn0040752	-0.350031	-0.335344	-0.104343	0.0256107	-0.032941	-0.00366515	0.413181	0.360931	#DIV/0!	#DIV/0!	#DIV/0!	#DIV/0!
alpha-Est7	FBgn0015575	0.0246774	-0.181199	-0.0609501	0.0194111	0.0724576	0.0459343	0.412707	0.115357	-0.196538	0.0435801	0.216525	0.130052
Ast	FBgn0015591	0.187849	0.129524	-0.0380567	-0.0704222	-0.0601814	-0.0653018	0.412455	0.295019	#DIV/0!	#DIV/0!	#DIV/0!	#DIV/0!
CG9240	FBgn0030669	0.0309748	0.0287558	-0.115303	-0.104969	-0.0986866	-0.101828	0.411503	0.142032	-0.303338	-0.301306	-0.214443	-0.257875
VhaM8.9	FBgn0037671	0.101114	0.175343	-0.0309514	0.0221052	-0.0292706	-0.0035827	0.411177	0.682519	0.0729028	-0.0526789	-0.389183	-0.220931
Spn43Ab	FBgn0024293	-0.0558537	-0.00637309	0.0576739	0.0580206	0.0773531	0.0676868	0.411099	0.154167	1.24889	0.394289	0.125767	0.260028
CG5757	FBgn0034299	0.0595609	-0.401569	0.14276	0.0640217	0.442085	0.253053	0.410325	0.362544	0.0328816	0.358972	0.452533	0.405753
CG11455	FBgn0031228	0.574329	0.829112	-0.142787	-0.143576	-0.152079	-0.147827	0.409956	0.0674115	-0.0764478	-0.104582	0.211836	0.0536269
Cyp12e1	FBgn0037817	0.42771	0.253584	-0.000548319	0.00584161	0.0627537	0.0342977	0.409845	0.187915	0.163159	0.467515	0.154706	0.311111
Vha100-5	FBgn0032373	-0.330683	-0.108821	-0.277423	0.142183	-0.0176257	0.0622787	0.40945	0.625264	-0.123115	0.483892	-0.0745565	0.204668
CG2811	FBgn0035082	0.443116	0.102313	-0.123371	-0.0431544	0.0585548	0.00770022	0.408806	0.269427	#DIV/0!	#DIV/0!	#DIV/0!	#DIV/0!
CheB42c	FBgn0066292	0.656274	0.363321	-0.315898	-0.0851664	-0.105385	-0.0952755	0.408062	0.262891	#DIV/0!	#DIV/0!	#DIV/0!	#DIV/0!
CG17322	FBgn0027070	0.313359	0.449356	0.136815	0.0519485	0.106703	0.079326	0.407975	0.417681	0.323727	-0.056652	-0.0281798	-0.0424159
CG1628	FBgn0030218	0.386103	0.0465128	-0.143391	0.129174	0.242334	0.185754	0.406944	0.250585	0.259579	0.207453	0.322295	0.264874
CG12375	FBgn0031987	0.651525	0.225824	0.0631823	0.0921342	0.196874	0.144504	0.405539	0.161221	0.0337624	0.246473	0.386744	0.316609
CG4408	FBgn0039073	0.0753264	-0.105232	-0.0771389	0.107092	0.214881	0.160986	0.405276	0.13915	-0.26706	0.0773927	0.322304	0.199848
Tret1-1	FBgn0050035	-0.0968714	-0.175745	0.00910469	-0.0328355	-0.0112749	-0.0220552	0.404814	0.154619	-0.000427823	-0.169678	-0.0975348	-0.133606
CG4679	FBgn0033816	-0.27045	0.0141362	0.110683	0.16705	0.21566	0.191355	0.403197	0.62797	-0.814447	-0.579269	-0.456852	-0.518061
CG42678	FBgn0261564	0.0894528	0.303432	-0.0809879	-0.0758418	-0.0916703	-0.083756	0.403071	0.204021	-0.337025	-0.71038	-0.491678	-0.601029
CG9147	FBgn0031774	0.454015	0.292449	-0.098303	-0.146995	-0.181841	-0.164418	0.402998	0.609421	#DIV/0!	#DIV/0!	#DIV/0!	#DIV/0!
CG6503	FBgn0040606	-0.147827	-0.299744	-0.0388041	0.0476031	0.0905412	0.0690722	0.402653	-0.0677898	0.3035	0.658327	1.43582	1.04707
CG31115	FBgn0051115	0.350247	0.812257	0.334975	0.040464	-0.430086	-0.194811	0.401772	0.435781	#DIV/0!	#DIV/0!	#DIV/0!	#DIV/0!
CG31436	FBgn0051436	0.29163	-0.918913	-0.0422142	-0.00872002	0.156454	0.0738671	0.401498	-0.319417	0.0556464	-0.0145721	-0.129262	-0.0719173
CG11127	FBgn0033178	0.112561	-0.158654	-0.0596056	-0.0945506	0.0221823	-0.0361842	0.401327	0.288114	#DIV/0!	#DIV/0!	#DIV/0!	#DIV/0!
CG6962	FBgn0037958	-0.406992	-0.894974	0.334958	0.145533	0.724005	0.434769	0.399573	0.724214	0.290875	-0.441027	-0.924617	-0.682822
CG3337	FBgn0038871	0.137263	0.262302	-0.225822	-0.129694	-0.134379	-0.132037	0.398333	0.655525	0.0995018	0.00571264	-0.138727	-0.0665072
CG18324	FBgn0033905	0.283455	-0.0263939	-0.282327	-0.0597029	-0.0631423	-0.0614226	0.397132	-0.700915	-0.532001	-0.256494	-1.02886	-0.642676
GNBP3	FBgn0040321	0.215821	0.148984	0.0627476	0.0135658	0.051879	0.0327224	0.397021	0.218266	0.272576	0.0307389	0.301687	0.166213
CG10116	FBgn0036367	-0.195811	-0.33357	-0.443304	0.146052	0.0740091	0.11003	0.39644	0.803766	#DIV/0!	#DIV/0!	#DIV/0!	#DIV/0!
CG5210	FBgn0013763	0.0903427	0.0721123	0.0810718	0.064272	0.095802	0.080037	0.396186	0.194044	0.126059	0.113384	0.255617	0.184501
Est-6	FBgn0000592	-0.234154	-0.286297	-0.147435	-0.045755	0.00746116	-0.0191469	0.395625	-0.0877097	0.307426	-0.206198	0.397183	0.0954925
Ndae1	FBgn0259111	0.100497	-0.00346715	-0.0729232	-0.00651995	-0.0349512	-0.0207356	0.395284	0.304189	-4.60351	-1.28268	-1.12523	-1.20396
Elp3	FBgn0031604	0.154834	-0.105428	0.142408	0.0180298	0.140479	0.0792545	0.394659	0.435419	0.0163131	0.0620499	0.0407358	0.0513928
itp	FBgn0035023	-0.296855	-0.54659	0.0666427	0.0305138	0.0733279	0.0519209	0.39446	0.346467	#DIV/0!	#DIV/0!	#DIV/0!	#DIV/0!
Cpr49Ae	FBgn0033728	-0.700155	-0.266047	-0.391412	-0.374507	-0.524775	-0.449641	0.394272	0.347421	-0.22527	-0.0440101	-0.0328564	-0.0384333
capa	FBgn0039722	0.211362	0.327815	0.0394695	0.0549084	0.0369637	0.0459361	0.394216	0.255397	-0.0746159	-0.135256	0.55694	0.210842
CG10253	FBgn0033983	0.64042	-0.139535	0.00406363	-0.170635	0.168834	-0.000900258	0.393955	-0.0583367	#DIV/0!	#DIV/0!	#DIV/0!	#DIV/0!
CG8005	FBgn0035854	-0.107795	-0.310189	0.0588269	0.00217191	0.251745	0.126958	0.393298	0.398065	#DIV/0!	#DIV/0!	#DIV/0!	#DIV/0!
CG2608	FBgn0032870	0.109321	0.144486	-0.201154	-0.162607	-0.189343	-0.175975	0.392567	0.227862	0.194501	-0.106244	0.176702	0.0352292
CG6583	FBgn0032420	-0.0722609	-0.246987	-0.00843222	-0.0550938	0.0192916	-0.0179011	0.389918	0.332376	-0.0160936	-0.242862	-0.332493	-0.287677
CG10646	FBgn0036292	0.268635	-0.28163	-0.0659438	-0.150133	0.129782	-0.0101757	0.38941	0.393539	-0.342638	-0.441809	-0.621936	-0.531873
egr	FBgn0033483	-0.0850718	-0.239128	-0.0665982	0.0632406	0.121333	0.0922867	0.38937	-0.00327212	#DIV/0!	#DIV/0!	#DIV/0!	#DIV/0!
CG4542	FBgn0029906	-0.0226701	-0.445681	0.0188907	-0.00216013	0.202722	0.100281	0.38927	0.236486	#DIV/0!	#DIV/0!	#DIV/0!	#DIV/0!
Rgk3	FBgn0085426	0.410433	0.227575	-0.206462	-0.289356	-0.236058	-0.262707	0.388383	0.309164	-0.102739	-0.0495091	-0.0046351	-0.0270721
CG34439	FBgn0085468	0.335917	-0.393703	-0.321457	-0.376702	0.0217695	-0.177466	0.388049	0.0341597	0.0132993	-0.16582	0.166503	0.000341327
pont	FBgn0040078	-0.0697508	0.0604199	0.0950807	0.0475404	0.011488	0.0295142	0.386753	0.333468	-0.0246843	-0.178813	-0.0485437	-0.113678
spag	FBgn0015544	0.381109	0.304874	0.29099	0.0171309	-7.18073e-05	0.00852956	0.385441	0.23966	-0.373085	-0.208657	-0.111021	-0.159839
Der-2	FBgn0038438	0.103948	-0.033245	0.048241	-0.0131248	0.0431502	0.0150127	0.385067	0.253078	#DIV/0!	#DIV/0!	#DIV/0!	#DIV/0!
Parp	FBgn0010247	-0.313087	-0.658345	-0.00342768	-0.0574556	-0.0305086	-0.0439821	0.384521	-0.218378	-0.0999639	0.109454	0.382017	0.245735
Egfr	FBgn0003731	0.0582425	0.0462695	0.0372179	0.0748566	0.104269	0.0895629	0.383943	0.370074	0.0375835	-0.11521	-0.218618	-0.166914
CG10672	FBgn0035588	0.445585	0.220021	-0.0518592	0.0462437	0.115439	0.0808415	0.382706	0.0829306	0.292593	0.0993276	0.085724	0.0925258
CG5646	FBgn0039525	0.500914	0.519471	-0.109687	0.0115487	-0.0749249	-0.0316881	0.381103	0.297171	0.150199	0.0165143	-0.300936	-0.142211
CG6231	FBgn0038720	0.595397	0.211156	0.0080839	-0.10893	-0.0758535	-0.0923918	0.381096	0.0445591	0.270366	-0.150196	-0.0275101	-0.0888529
CG30394	FBgn0050394	0.0158858	-0.280524	0.0469155	-0.00134606	0.151569	0.0751115	0.380962	0.520703	#DIV/0!	#DIV/0!	#DIV/0!	#DIV/0!
sev	FBgn0003366	-0.0201585	-0.44699	0.0247915	0.0558954	0.243091	0.149493	0.380772	0.421768	#DIV/0!	#DIV/0!	#DIV/0!	#DIV/0!
obst-E	FBgn0031737	0.246144	0.0608176	0.351542	0.0479451	0.207061	0.127503	0.380696	0.100092	0.0914785	0.113564	0.103702	0.108633
CG9641	FBgn0031483	-0.0717154	0.385995	-0.0187187	-0.213718	-0.163317	-0.188517	0.380449	0.0922553	#DIV/0!	#DIV/0!	#DIV/0!	#DIV/0!
CG6126	FBgn0038407	0.292458	-0.0456933	-0.16594	-0.0367174	0.0506763	0.00697945	0.380439	0.252938	-0.0865047	-0.143746	-0.273214	-0.20848
CG14621	FBgn0031183	0.0637047	0.0378	0.0265789	-0.0104116	0.00423706	-0.00308726	0.379481	0.404389	#DIV/0!	#DIV/0!	#DIV/0!	#DIV/0!
CG4872	FBgn0030799	-0.132926	-0.458162	-0.0927474	-0.00363656	0.171609	0.0839863	0.379125	0.416907	-0.00216308	0.151234	0.282204	0.216719
CdGAPr	FBgn0032821	-0.650216	-0.56254	0.0462582	0.0507627	0.0378081	0.0442854	0.378478	0.34338	#DIV/0!	#DIV/0!	#DIV/0!	#DIV/0!
cold	FBgn0031268	0.0486075	-0.00240606	0.0663713	-0.00872093	0.0463568	0.0188179	0.377864	0.492588	#DIV/0!	#DIV/0!	#DIV/0!	#DIV/0!
r	FBgn0003189	-0.012173	-0.222781	0.116237	0.178495	0.358478	0.268487	0.377228	0.400893	0.0279005	-0.0390326	-0.10188	-0.0704562
Fis1	FBgn0039969	0.385265	0.372869	0.0298787	0.00820676	0.0220949	0.0151508	0.377178	0.410781	0.0316332	0.0726767	0.125399	0.0990377
CG31211	FBgn0051211	-0.0119957	0.17318	-0.15772	-0.113747	-0.156639	-0.135193	0.377049	0.286589	#DIV/0!	#DIV/0!	#DIV/0!	#DIV/0!
GstE5	FBgn0063495	0.00612335	0.361166	-0.174115	-0.00640926	0.0100024	0.00179659	0.37665	0.910019	-0.155228	0.0701459	0.207973	0.13906
mRpL16	FBgn0023519	0.362425	0.300478	0.0302709	0.0911817	0.166783	0.128982	0.374709	0.921462	#DIV/0!	#DIV/0!	#DIV/0!	#DIV/0!
CG4630	FBgn0033809	0.289627	-0.0742242	0.0468318	0.0427093	0.287647	0.165178	0.373155	0.5402	#DIV/0!	#DIV/0!	#DIV/0!	#DIV/0!
Mal-A2	FBgn0002569	0.55023	0.28434	-0.256486	0.159314	0.141698	0.150506	0.372934	0.577921	-0.65562	0.491662	-0.0972885	0.197187
CG9231	FBgn0036887	0.595726	0.569603	-0.197451	-0.0472346	-0.0148549	-0.0310447	0.372442	0.267533	0.0493837	0.095196	-0.135044	-0.019924
Tg	FBgn0031975	0.202789	0.14289	-0.0144731	-0.063447	-0.0227963	-0.0431216	0.371749	0.344783	0.158658	0.0814023	-0.0464179	0.0174922
plx	FBgn0261261	0.802786	0.915043	-0.130519	-0.221665	-0.306614	-0.26414	0.371528	0.386548	#DIV/0!	#DIV/0!	#DIV/0!	#DIV/0!
mdy	FBgn0004797	-0.290031	-0.461724	-0.0572247	0.0843113	0.130176	0.107244	0.370846	0.170265	0.482201	0.046061	0.481533	0.263797
mRpS35	FBgn0035374	0.0532466	0.213746	-0.0550484	0.0297725	0.057539	0.0436558	0.370777	0.720715	-0.465413	-0.497801	-0.482246	-0.490023
r-l	FBgn0003257	0.278207	-0.247273	-0.0200907	-0.0622346	0.329305	0.133535	0.370295	0.607315	-0.159303	0.168152	0.181422	0.174787
CG13901	FBgn0035164	0.149717	0.344814	0.250209	-0.0487846	-0.0424522	-0.0456184	0.369629	0.252282	#DIV/0!	#DIV/0!	#DIV/0!	#DIV/0!
Fmrf	FBgn0000715	0.235558	0.138149	0.304253	-0.00509533	0.0228674	0.00888606	0.368988	-0.103092	-0.160931	0.361568	0.65976	0.510664
mRpS9	FBgn0037529	-0.382812	-0.378421	-0.018748	0.00530693	0.0511	0.0282035	0.368914	0.581194	-0.987809	-0.696364	-0.513915	-0.60514
CG7830	FBgn0032015	0.100557	-0.154216	0.125182	0.0418586	0.108631	0.0752447	0.368396	0.301114	0.0352759	0.0145147	-0.274189	-0.129837
mRpS5	FBgn0044510	-0.286945	-0.34221	0.0269316	0.0413867	0.0314695	0.0364281	0.368211	0.732816	-0.461297	-0.58501	-0.653773	-0.619391
Mlp84B	FBgn0014863	-0.196345	-0.15916	-0.178741	-0.215354	-0.248993	-0.232173	0.367946	0.307507	0.204785	0.09352	0.181377	0.137448
CG30499	FBgn0050499	0.571506	0.394588	-0.00409027	-0.0554397	0.034698	-0.0103708	0.367732	0.52631	#DIV/0!	#DIV/0!	#DIV/0!	#DIV/0!
Iap2	FBgn0015247	0.116307	0.188096	-0.021783	-0.0509271	-0.0883691	-0.0696481	0.366917	0.339899	#DIV/0!	#DIV/0!	#DIV/0!	#DIV/0!
CG2316	FBgn0039890	0.112589	0.119407	-0.0637639	0.00881524	0.00191146	0.00536335	0.366845	0.296322	#DIV/0!	#DIV/0!	#DIV/0!	#DIV/0!
CG5390	FBgn0032213	0.105989	0.0178568	0.0181586	0.0108644	0.0765562	0.0437103	0.366368	0.143456	0.27583	0.15054	0.466968	0.308754
Treh	FBgn0003748	0.105616	0.12169	-0.0984722	0.0243872	0.00803693	0.0162121	0.36632	0.380214	-0.432942	-0.273215	-0.276819	-0.275017
CG17919	FBgn0037433	0.508461	0.255124	-0.06233	-0.0483803	-0.00656657	-0.0274734	0.365558	0.127721	0.166723	0.24926	0.536016	0.392638
CG14105	FBgn0036359	0.251119	0.332819	-0.0939199	-0.0466767	0.0387536	-0.00396154	0.365038	0.549336	-0.128796	-0.0904798	0.0972777	0.00339893
CG17219	FBgn0031494	-0.156888	-0.354061	0.529795	0.343617	0.786038	0.564827	0.364974	0.32283	0.204737	0.160259	0.23998	0.200119
CG7328	FBgn0036942	0.183183	-0.287991	0.0546415	0.105002	0.470782	0.287892	0.36458	0.401145	#DIV/0!	#DIV/0!	#DIV/0!	#DIV/0!
CG7394	FBgn0036173	0.606102	0.606634	-0.061503	-0.0861439	-0.0517624	-0.0689532	0.364414	0.264008	-0.562221	-0.253089	-0.243947	-0.248518
CG13360	FBgn0025620	-0.212514	-0.0728238	-0.337793	-0.0987974	-0.028228	-0.0635127	0.364296	0.0388348	#DIV/0!	#DIV/0!	#DIV/0!	#DIV/0!
mRpS2	FBgn0031639	-0.22372	-0.314158	0.098537	0.170787	0.236595	0.203691	0.363961	0.580025	-0.760497	-0.466254	-0.220859	-0.343557
CG5455	FBgn0039430	0.0645428	0.00239794	-0.112065	-0.0883502	-0.053925	-0.0711376	0.363769	0.3027	#DIV/0!	#DIV/0!	#DIV/0!	#DIV/0!
Mdr49	FBgn0004512	0.858394	0.894739	-0.20174	0.00730747	-0.0723931	-0.0325428	0.363409	0.529681	#DIV/0!	#DIV/0!	#DIV/0!	#DIV/0!
Catsup	FBgn0002022	0.205301	0.0474894	0.130476	0.00878148	0.0761881	0.0424848	0.363144	0.426232	#DIV/0!	#DIV/0!	#DIV/0!	#DIV/0!
Cpr76Bd	FBgn0036881	-0.388616	-0.668648	0.315825	0.784332	1.21629	1.00031	0.363053	0.672548	0.259985	0.0251669	-0.453239	-0.214036
Lk	FBgn0028418	0.561769	0.53853	0.104504	-0.0093996	-0.0372709	-0.0233352	0.36279	0.0516184	0.201613	0.378935	0.568492	0.473713
GstE3	FBgn0063497	0.531905	0.669567	-0.136708	-0.0253751	-0.0117262	-0.0185506	0.361852	0.691068	-0.0334225	0.328934	0.444972	0.386953
CG3699	FBgn0040349	0.427986	0.0465663	-0.16681	0.0581596	0.14713	0.102645	0.361712	0.4089	-0.423063	0.184371	0.439212	0.311791
Elp1	FBgn0037926	-0.151934	-0.373162	0.267791	0.173495	0.253643	0.213569	0.361562	0.425482	0.116155	0.310046	0.131579	0.220813
Vps33B	FBgn0039335	0.257951	-0.0108517	0.171418	-0.0863144	-0.00741393	-0.0468642	0.361436	0.237133	#DIV/0!	#DIV/0!	#DIV/0!	#DIV/0!
Fmo-2	FBgn0033079	-0.220578	-0.201882	-0.185093	0.102143	0.0434246	0.0727836	0.361115	0.199539	0.0700228	0.0206819	0.392888	0.206785
CG1518	FBgn0031149	0.0108678	-0.0437331	0.0679415	0.00529568	0.0617507	0.0335232	0.360784	0.298508	0.194256	0.0276502	-0.357905	-0.165127
List	FBgn0034381	0.511336	0.19012	-0.12306	0.0648882	0.00268037	0.0337843	0.360713	-0.0640107	#DIV/0!	#DIV/0!	#DIV/0!	#DIV/0!
pn	FBgn0003116	0.484128	0.372612	0.0726833	0.0308816	0.115089	0.0729854	0.360287	0.395784	0.169744	0.259143	0.331374	0.295258
CG5500	FBgn0039461	0.787593	0.692209	-0.228011	-0.120574	-0.119398	-0.119986	0.359956	-0.0142427	-0.334147	-0.275385	0.182578	-0.0464034
Aats-tyr	FBgn0027080	-0.279006	-0.352501	-0.0121486	-0.0229787	-0.0177035	-0.0203411	0.359857	-0.0893564	-0.240277	-0.0573961	-0.0519764	-0.0546862
CG7442	FBgn0037140	-0.659666	-0.551025	0.10926	0.0282384	0.20241	0.115324	0.359364	0.655892	#DIV/0!	#DIV/0!	#DIV/0!	#DIV/0!
CG5009	FBgn0027572	0.013714	0.0162083	-0.0154626	0.0212191	0.0395118	0.0303654	0.358036	0.321361	0.183979	0.178843	0.107497	0.14317
Apf	FBgn0051713	0.164707	0.195936	-0.149675	-0.125011	-0.0884211	-0.106716	0.358006	0.251857	0.0595028	-0.0195906	0.164264	0.0723368
boca	FBgn0004132	0.322378	0.208481	0.0740372	0.00672708	0.0798902	0.0433086	0.357628	0.291833	0.165245	0.204948	0.34571	0.275329
fd68A	FBgn0036134	0.0776664	-0.051514	-0.0387489	-0.0252426	-0.00233837	-0.0137905	0.357071	0.319584	#DIV/0!	#DIV/0!	#DIV/0!	#DIV/0!
ck	FBgn0000317	0.0827284	-0.178646	-0.0824463	0.103624	0.201197	0.152411	0.356867	0.355408	#DIV/0!	#DIV/0!	#DIV/0!	#DIV/0!
CG7484	FBgn0036745	0.261888	0.0169902	0.141586	-0.0184767	0.0756758	0.0285995	0.355853	0.357284	-0.00851741	0.0548301	0.0207136	0.0377719
CG31648	FBgn0051648	0.166006	0.0653264	-0.102939	-0.026177	0.0648022	0.0193126	0.355185	0.216299	-0.507141	-0.56675	-0.488669	-0.527709
Spn42Dc	FBgn0033113	-0.110006	-0.280171	-0.137006	0.159673	0.145882	0.152777	0.354188	0.307872	#DIV/0!	#DIV/0!	#DIV/0!	#DIV/0!
CG6370	FBgn0034277	0.193841	0.242694	0.137939	0.0686746	0.113247	0.090961	0.35363	0.345714	0.0283032	0.0598533	-0.266285	-0.103216
Aprt	FBgn0000109	0.204515	-0.19249	0.0458147	-0.000401471	0.161212	0.0804053	0.352805	0.31023	0.209487	-0.0838556	0.0374381	-0.0232088
CG5174	FBgn0034345	0.188915	0.11433	0.0911491	0.0349555	0.0550093	0.0449824	0.351907	0.262553	0.00170422	0.193989	0.122913	0.158451
CG1681	FBgn0030484	0.761454	0.494512	-0.053464	0.0301727	0.0699842	0.0500785	0.350697	0.493644	-0.0464252	0.542428	0.650466	0.596447
MED4	FBgn0035754	0.12012	-0.0490788	0.0493138	0.0386782	0.16247	0.100574	0.350399	0.177825	#DIV/0!	#DIV/0!	#DIV/0!	#DIV/0!
opm	FBgn0264389	0.336266	-0.0116498	0.0362802	0.00521966	0.043923	0.0245713	0.350029	0.0191696	#DIV/0!	#DIV/0!	#DIV/0!	#DIV/0!
26-29-p	FBgn0250848	-0.160757	-0.439844	0.0570722	0.0389456	0.095364	0.0671548	0.349727	-0.0563788	0.411501	0.329891	0.40391	0.366901
Pcd	FBgn0024841	0.104214	-0.181711	-0.036082	-0.040781	0.0470682	0.0031436	0.349686	-0.100922	0.697316	0.106823	0.569359	0.338091
CG32407	FBgn0052407	-0.53181	-0.361094	-0.286949	-0.0626085	-0.0144501	-0.0385293	0.349386	0.352555	-0.00809351	0.060763	-0.0058086	0.0274772
Cyp4s3	FBgn0030615	-0.376171	-0.675237	-0.53143	0.023067	0.180537	0.101802	0.349253	0.605784	#DIV/0!	#DIV/0!	#DIV/0!	#DIV/0!
CG10175	FBgn0039084	-0.201604	0.436749	-0.128147	0.119608	-0.0788407	0.0203838	0.349237	0.100124	0.0182586	0.39177	0.510293	0.451031
Sk1	FBgn0030300	0.183968	-0.19673	0.0488016	0.00400855	0.152408	0.0782083	0.348478	0.441361	#DIV/0!	#DIV/0!	#DIV/0!	#DIV/0!
Hex-C	FBgn0001187	0.102176	-0.11775	-0.039174	0.0762487	0.105163	0.0907059	0.348432	0.24194	-0.239493	0.0952387	0.207101	0.15117
Bmcp	FBgn0036199	0.298626	0.117458	-0.0150272	-0.0177994	0.147434	0.0648172	0.348427	0.26897	0.0563061	-0.0493572	-0.0666155	-0.0579864
CG18317	FBgn0031359	0.655508	0.743195	-0.231717	-0.183034	-0.223432	-0.203233	0.34706	0.309467	-0.0813566	-0.0963654	-0.453807	-0.275086
CG9350	FBgn0034576	0.192962	0.252709	-0.0692853	-0.0804769	-0.0751974	-0.0778372	0.345905	0.0867001	-0.11334	-0.219981	-0.137485	-0.178733
Trax	FBgn0038327	-0.0334194	-0.383389	0.0911201	-0.00172865	0.153942	0.0761069	0.345599	0.26565	#DIV/0!	#DIV/0!	#DIV/0!	#DIV/0!
CG2137	FBgn0033190	0.479159	0.863588	-0.0676621	-0.370838	-1.24279	-0.806814	0.344959	0.222392	#DIV/0!	#DIV/0!	#DIV/0!	#DIV/0!
CG33127	FBgn0053127	-0.0939517	0.013192	-0.460563	0.0334728	-0.14598	-0.0562534	0.344669	0.708157	#DIV/0!	-0.00675494	-0.191734	-0.0992444
CG42351	FBgn0259682	0.0683921	0.386406	0.0185394	0.0155153	0.0158204	0.0156679	0.344007	0.465438	-0.559326	-0.376899	-0.427251	-0.402075
CG9331	FBgn0032889	0.936697	0.495184	-0.0725136	0.00433153	0.0546384	0.029485	0.343779	0.444217	0.0208484	0.197428	0.530985	0.364207
Obp56e	FBgn0034471	-0.747868	0.529068	1.39683	1.13612	0.690371	0.913244	0.342972	0.937039	0.319183	-0.0453819	0.101069	0.0278436
CG10863	FBgn0027552	0.230837	0.207897	-0.124575	0.0106235	0.0187365	0.01468	0.341934	0.200171	-0.0421348	0.063104	0.236645	0.149874
CG33090	FBgn0028916	-0.0910191	-0.108485	-0.148874	-0.0480648	-0.0385939	-0.0433293	0.341485	0.277362	0.0373568	0.0280421	0.175037	0.101539
dnd	FBgn0038916	0.404295	-0.153027	-0.384188	-0.115047	0.108703	-0.00317182	0.340835	0.115834	0.108126	0.237558	0.305686	0.271622
Npc2g	FBgn0039800	-0.0940846	0.163283	-0.11303	0.0371502	0.0493545	0.0432523	0.340677	0.143991	-0.118934	-0.0835495	0.167439	0.0419448
CG18095	FBgn0028872	0.0982891	0.45427	-0.310867	0.162805	-0.016406	0.0731997	0.340343	0.234901	#DIV/0!	#DIV/0!	#DIV/0!	#DIV/0!
CG5270	FBgn0037897	-0.344067	-0.527721	0.150577	0.155648	0.26195	0.208799	0.340138	0.221656	#DIV/0!	#DIV/0!	#DIV/0!	#DIV/0!
CG13893	FBgn0035146	0.50057	0.375595	-0.144218	-0.0817616	-0.0181205	-0.0499411	0.339896	0.216402	#DIV/0!	#DIV/0!	#DIV/0!	#DIV/0!
ScpX	FBgn0015808	0.0449538	0.0362562	-0.0358991	-0.0066373	0.0336536	0.0135082	0.339789	0.232313	0.142904	0.130883	0.291835	0.211359
fabp	FBgn0037913	0.416561	0.090789	-0.292438	-0.119009	0.108031	-0.00548884	0.339115	0.37681	-0.255983	-0.0915307	0.0561149	-0.0177079
CG30010	FBgn0050010	0.293398	0.269702	-0.0286655	-0.207406	-0.0739795	-0.140693	0.339029	0.293641	-0.0103228	-0.0905001	0.17455	0.0420252
Sptr	FBgn0014032	0.369585	0.186752	-0.138227	-0.121854	0.029998	-0.0459281	0.338864	0.684118	-0.146157	-0.0651362	-0.0415082	-0.0533222
mRpS29	FBgn0034727	0.36859	0.273218	0.240515	0.117187	0.181652	0.14942	0.338313	0.592654	-0.914008	-0.652775	-0.679253	-0.666014
CG14103	FBgn0036908	0.501536	0.379406	0.244262	0.0414586	0.116741	0.0790997	0.337695	0.326384	-0.0168657	-0.311429	-0.281634	-0.296531
CG9396	FBgn0037714	0.0042642	-0.60987	-0.0679878	0.0496144	0.114895	0.0822545	0.337086	0.144878	0.180765	0.0415935	-0.0624019	-0.0104042
dp	FBgn0053196	-0.481622	-0.647615	0.077762	0.284468	0.215574	0.250021	0.336476	0.363494	0.495866	0.254867	0.0579757	0.156421
nahoda	FBgn0034797	0.216059	0.172056	-0.038279	-0.0610244	-0.0609605	-0.0609924	0.336092	0.345814	0.193764	0.157349	0.0780877	0.117719
scramb1	FBgn0052056	-0.0191032	-0.0433653	0.102093	0.0270328	0.0328638	0.0299483	0.33552	0.335387	0.0718079	-0.326415	-0.529965	-0.42819
RIC-3	FBgn0050296	0.239199	0.199531	-0.23392	-0.214615	-0.230031	-0.222323	0.335332	0.333721	#DIV/0!	#DIV/0!	#DIV/0!	#DIV/0!
Dip-C	FBgn0000455	0.195712	0.114134	-0.0588931	0.0312038	0.0104488	0.0208263	0.335265	0.609363	-0.199088	0.146569	0.0458217	0.0961951
Tango9	FBgn0260744	0.187638	-0.0792605	0.0204825	0.021084	0.0897829	0.0554334	0.334677	0.277276	#DIV/0!	#DIV/0!	#DIV/0!	#DIV/0!
CG5508	FBgn0027579	-0.117245	-0.146179	0.030313	0.0807858	0.0971493	0.0889676	0.334377	0.46052	0.0230945	0.0452594	-0.0822159	-0.0184782
TRAM	FBgn0040340	-0.282071	-0.26649	0.131286	0.00550948	0.0158358	0.0106726	0.333053	0.497393	#DIV/0!	#DIV/0!	#DIV/0!	#DIV/0!
twr	FBgn0262801	-0.0579053	-0.158899	0.0909008	0.0283282	0.0558197	0.0420739	0.332546	0.38135	0.162478	-0.00673406	-0.302448	-0.154591
CG4302	FBgn0027073	0.329469	0.195583	-0.0123109	0.042471	0.0883894	0.0654302	0.331862	0.353123	0.230034	0.446401	0.136977	0.291689
CG8777	FBgn0033376	0.0924523	-0.158001	0.0384674	-0.105765	0.0218389	-0.0419629	0.331686	0.444794	0.0106448	-0.210832	-0.074841	-0.142836
CG11722	FBgn0037777	0.395327	0.524209	-0.276214	-0.267414	-0.270192	-0.268803	0.331648	0.460145	-0.431555	-0.16707	0.00235101	-0.0823593
CG8043	FBgn0037610	0.668005	0.883339	0.241245	0.217197	0.221224	0.21921	0.330147	0.234282	0.0240829	0.251969	0.632726	0.442348
Cap-D3	FBgn0051989	-0.0800602	-0.455726	0.149057	0.00906593	0.487268	0.248167	0.330091	-0.243618	#DIV/0!	#DIV/0!	#DIV/0!	#DIV/0!
CG3792	FBgn0031662	0.177792	0.103097	0.163454	0.0115393	0.087523	0.0495312	0.329832	0.120624	0.290972	0.0118593	-0.183281	-0.0857107
Pbprp2	FBgn0011280	0.184152	0.278752	0.250425	0.0736913	0.0741324	0.0739119	0.329352	0.199537	0.577176	0.348962	0.473178	0.41107
Ost48	FBgn0014868	0.158526	-0.0155867	0.0711199	0.0291001	0.0888378	0.0589689	0.328924	0.270109	0.0979741	0.117291	-0.0975563	0.00986754
CG2100	FBgn0037369	0.464109	0.522523	0.270274	0.119837	0.130273	0.125055	0.328669	0.335387	0.15226	0.14613	0.314236	0.230183
pigs	FBgn0029881	0.277674	0.0594439	0.00788686	-0.0208259	-0.0797144	-0.0502701	0.328502	0.0543711	#DIV/0!	#DIV/0!	#DIV/0!	#DIV/0!
CG8455	FBgn0031997	0.128962	-0.0808107	0.0127849	-0.0285048	0.120082	0.0457887	0.328111	0.199106	#DIV/0!	#DIV/0!	#DIV/0!	#DIV/0!
CG1143	FBgn0035359	0.144333	0.260818	-0.120993	0.0259898	-0.00230316	0.0118433	0.328038	-0.148604	0.327418	0.248588	0.376675	0.312632
CG6465	FBgn0037818	0.536597	0.578146	-0.244864	-0.0159949	-0.0430879	-0.0295414	0.326487	0.0897336	-0.185608	0.191739	0.45711	0.324425
mRpS16	FBgn0033907	0.707423	0.633043	-0.0821203	-0.0641915	-0.0571292	-0.0606603	0.326321	0.690099	#DIV/0!	#DIV/0!	#DIV/0!	#DIV/0!
CG34455	FBgn0085484	0.255661	0.204293	-0.102016	0.0857313	0.0561102	0.0709208	0.32617	0.378408	-0.148963	0.201589	0.304747	0.253168
Edc3	FBgn0036735	0.146949	-0.0426709	0.185012	0.0315322	0.156074	0.093803	0.325884	-0.209017	#DIV/0!	#DIV/0!	#DIV/0!	#DIV/0!
CG14661	FBgn0037288	0.752206	0.462838	-0.0958649	-0.137644	-0.11982	-0.128732	0.325479	0.0534031	0.219809	0.207633	0.0164728	0.112053
Fer1HCH	FBgn0015222	-0.964111	-0.944341	0.0101074	0.0852334	0.0772616	0.0812475	0.32491	0.349581	0.434981	0.036828	0.202967	0.119897
mRpS17	FBgn0034986	0.165041	0.221484	0.0408546	0.0606183	0.0631662	0.0618922	0.322936	0.543466	-0.689662	-0.563324	-0.331368	-0.447346
Peritrophin-A	FBgn0022770	0.290386	-0.0169459	-0.136319	-0.0415349	0.124116	0.0412905	0.322886	0.0873567	-0.0913282	0.0354655	0.148229	0.0918474
Fer2LCH	FBgn0015221	-0.945338	-0.83041	0.0879679	0.147927	0.12913	0.138529	0.32242	0.411532	0.33051	0.0222351	0.0618972	0.0420662
AQP	FBgn0033807	0.368219	0.34144	-0.0871243	-0.189557	-0.219053	-0.204305	0.321015	0.436711	0.195679	0.0688188	-0.310337	-0.120759
CG8613	FBgn0033924	0.713771	0.814808	0.0151074	-0.0440579	-0.0420841	-0.043071	0.31889	0.270776	-0.0325728	0.261845	0.32072	0.291282
mei-9	FBgn0002707	-0.0225912	-0.220818	0.415227	0.234141	0.765809	0.499975	0.318469	-0.162315	#DIV/0!	#DIV/0!	#DIV/0!	#DIV/0!
CG10345	FBgn0027562	0.770092	0.710029	-0.243244	-0.0884861	-0.0508303	-0.0696582	0.318313	0.550133	0.66268	0.808593	0.077721	0.443157
Eno	FBgn0000579	0.735924	0.800853	-0.133342	-0.138142	-0.189276	-0.163709	0.318239	0.219564	-0.111711	-0.0558525	0.0873104	0.0157289
CG12746	FBgn0037341	0.21883	0.047258	0.0388254	-0.0392916	0.0131357	-0.0130779	0.317691	0.239541	#DIV/0!	#DIV/0!	#DIV/0!	#DIV/0!
CG10217	FBgn0039113	-0.112742	-0.192891	0.0823611	0.0149935	0.0655318	0.0402627	0.31703	0.237831	0.35281	0.109148	-0.139953	-0.0154025
CG8834	FBgn0033733	-0.7581	-0.508953	-0.167528	0.184083	-0.000235358	0.0919239	0.316661	0.320781	-0.537789	0.681722	0.16903	0.425376
CG6015	FBgn0038927	-0.184975	-0.135299	-0.00216118	0.00828731	0.0217873	0.0150373	0.316502	0.521509	#DIV/0!	#DIV/0!	#DIV/0!	#DIV/0!
CG10340	FBgn0022344	0.436354	-0.317138	-0.0950051	-0.144943	-0.129272	-0.137107	0.315957	-0.00929349	-0.124539	-0.147222	-0.221851	-0.184537
Ady43A	FBgn0026602	0.578768	0.0634244	-0.184245	-0.154234	-0.214557	-0.184396	0.31572	0.010115	-0.00904269	-0.0256544	-0.0479622	-0.0368083
CG34213	FBgn0085242	-0.229676	-0.268289	0.074592	0.0791018	0.176135	0.127618	0.315596	-0.0506728	#DIV/0!	#DIV/0!	#DIV/0!	#DIV/0!
Npc2h	FBgn0039801	0.461443	0.446442	-0.387417	-0.0299735	-0.0880758	-0.0590247	0.315113	-0.0870957	0.0185969	0.0163049	0.404171	0.210238
Vha36-3	FBgn0040377	0.615514	0.680116	0.105398	0.05226	0.06614	0.0592	0.314808	0.341501	-0.0771498	0.279688	0.110321	0.195005
CG9248	FBgn0032923	0.0721576	0.05506	-0.0127829	-0.0251579	0.00439597	-0.010381	0.314593	-0.0158699	-0.033876	0.0796794	0.0586854	0.0691824
trsn	FBgn0033528	0.0940393	0.0239726	0.314393	0.139381	0.241655	0.190518	0.313728	0.252432	0.193018	-0.00212311	0.0313893	0.0146331
CG9673	FBgn0030775	-0.298343	-0.131273	-0.402105	0.100436	0.00529451	0.0528651	0.313689	0.833933	-0.703406	0.61623	-0.0158753	0.300177
CG17184	FBgn0037884	-0.0254532	0.255934	0.0379446	-0.0249358	-0.00854826	-0.0167421	0.313205	0.0473576	#DIV/0!	#DIV/0!	#DIV/0!	#DIV/0!
mRpS10	FBgn0038307	0.503532	0.402397	-0.0625038	-0.0720115	-0.015193	-0.0436022	0.312846	0.466433	-0.697934	#DIV/0!	#DIV/0!	#DIV/0!
CG34355	FBgn0085384	0.692353	0.649194	-0.0535261	0.426116	0.564215	0.495166	0.312724	0.516758	#DIV/0!	#DIV/0!	#DIV/0!	#DIV/0!
CG10585	FBgn0037044	0.263011	0.250583	-0.0536343	0.0388163	0.104544	0.0716803	0.312708	0.125218	-0.499978	-0.176868	-0.306217	-0.241543
rept	FBgn0040075	-0.0188309	0.162842	0.425153	0.204379	0.198139	0.201259	0.311159	0.263562	-0.0992394	-0.158322	-0.0688605	-0.113591
CG5791	FBgn0040582	0.432704	-0.41687	0.222647	0.0540638	0.126969	0.0905163	0.311078	-0.23921	0.728591	0.820716	0.482374	0.651545
Teh3	FBgn0040697	0.134135	0.139631	-0.332353	-0.213562	-0.221707	-0.217635	0.310809	0.281225	#DIV/0!	#DIV/0!	#DIV/0!	#DIV/0!
CG32250	FBgn0052250	0.304037	-0.0609608	-0.0767193	-0.0553303	0.0332128	-0.0110588	0.310644	0.241481	#DIV/0!	#DIV/0!	#DIV/0!	#DIV/0!
bou	FBgn0261284	0.0666602	-0.00766808	-0.0314796	-0.0504002	0.0546465	0.00212315	0.310511	0.380963	#DIV/0!	#DIV/0!	#DIV/0!	#DIV/0!
CG9509	FBgn0030594	0.416538	0.867834	-0.593741	0.0567311	-0.0313534	0.0126889	0.309519	0.528069	-1.59262	0.313156	0.528139	0.420648
CG13309	FBgn0035933	0.821336	-0.744733	-0.0540844	0.0585243	0.0630685	0.0607964	0.309087	-0.462565	#DIV/0!	#DIV/0!	#DIV/0!	#DIV/0!
RPA2	FBgn0032906	0.134522	0.319011	0.398885	0.34626	0.412549	0.379404	0.308669	0.519348	-0.186592	0.00867159	0.0337133	0.0211924
Mal-A4	FBgn0033294	0.305039	0.620825	-0.190512	0.220049	0.0994959	0.159773	0.308573	0.431359	#DIV/0!	#DIV/0!	#DIV/0!	#DIV/0!
CG32732	FBgn0052732	0.602041	0.386029	0.130095	-0.130135	-0.0732909	-0.101713	0.308535	0.388604	0.465541	0.104152	0.201204	0.152678
CG7888	FBgn0036116	0.516139	0.0857894	0.00212081	-0.0247332	0.0227351	-0.000999015	0.308055	0.307374	-0.368447	-0.138135	-0.745936	-0.442036
CG11241	FBgn0037186	0.939567	0.692034	-0.150506	-0.0827461	0.0432584	-0.0197439	0.307468	0.377861	-0.612281	-0.207076	-0.384371	-0.295724
Gli	FBgn0001987	-0.109457	-0.325688	-0.0250871	0.0645238	0.0957932	0.0801585	0.306767	0.334493	0.415997	0.189885	-0.0609167	0.064484
CG9436	FBgn0033101	-0.261008	-0.120718	-0.125926	0.0303569	0.00525801	0.0178075	0.306247	0.294048	-0.057268	0.0449584	0.226858	0.135908
sky	FBgn0032901	-0.0767676	-0.37832	-0.0710703	-0.0829004	0.0558471	-0.0135267	0.306157	0.342001	0.137851	0.227405	-0.0294167	0.098994
Rb97D	FBgn0004903	-0.0171028	0.0736851	-0.00274357	-0.107152	-0.123363	-0.115257	0.305709	0.00411069	#DIV/0!	#DIV/0!	#DIV/0!	#DIV/0!
Asph	FBgn0034075	-0.430258	-0.199205	-0.0224686	0.0168096	-0.0153169	0.000746325	0.305433	0.390067	0.568755	0.518023	0.385502	0.451762
CG5045	FBgn0032229	0.277896	0.224176	0.0501198	0.0646428	0.0726808	0.0686618	0.305201	-0.115574	-0.637815	-0.231954	-0.348616	-0.290285
Mdr65	FBgn0004513	0.491316	0.409018	-0.0187884	-0.105295	0.0471377	-0.0290786	0.304841	0.509729	-0.0782424	-0.117543	-0.627573	-0.372558
CG4577	FBgn0031306	0.184955	0.383041	0.0951753	0.0826434	0.0284176	0.0555305	0.304529	0.05	-0.114262	-0.275627	0.0980146	-0.0888064
cathD	FBgn0029093	-0.103987	-0.367723	0.133929	0.0832232	0.115734	0.0994787	0.303741	0.0736777	0.330965	0.358598	0.483697	0.421147
CG9572	FBgn0031089	0.243021	-0.04691	-0.111513	-0.113873	-0.112442	-0.113158	0.3036	0.050045	0.352446	0.204869	0.260887	0.232878
mRpS6	FBgn0035534	0.425406	0.270817	0.0747115	-0.0307567	0.0635322	0.0163877	0.302278	0.617379	-0.466723	-0.342249	-0.17172	-0.256984
A2bp1	FBgn0052062	-0.246422	-0.207017	-0.081484	-0.105358	-0.136444	-0.120901	0.302094	0.243473	#DIV/0!	#DIV/0!	#DIV/0!	#DIV/0!
Surf4	FBgn0019925	-0.0882134	-0.146832	0.0747576	-0.00393753	0.0278484	0.0119554	0.301928	0.14431	0.367433	0.231903	-0.172049	0.0299271
CG9166	FBgn0029514	0.547526	0.273139	-0.0985587	-0.132443	0.00865603	-0.0618936	0.301602	0.539432	#DIV/0!	#DIV/0!	#DIV/0!	#DIV/0!
CG33276	FBgn0053276	-0.106659	-0.361374	0.0586571	-0.0878338	0.0684452	-0.0096943	0.30124	0.258921	#DIV/0!	#DIV/0!	#DIV/0!	#DIV/0!
RpL38	FBgn0040007	-0.14159	-0.0665083	0.0499574	0.0474827	0.0395716	0.0435272	0.301207	0.214253	-0.760783	-0.247045	-0.210594	-0.22882
CG5776	FBgn0032450	-0.0866158	-0.422006	0.298801	0.103228	0.677069	0.390148	0.300988	0.268518	#DIV/0!	#DIV/0!	#DIV/0!	#DIV/0!
sel	FBgn0263260	0.262118	-0.059406	0.126082	-0.00469517	0.0488273	0.0220661	0.300791	0.206641	0.117056	0.0738439	0.255956	0.1649
CG6194	FBgn0038325	0.166253	0.0669462	-0.105669	-0.138664	-0.0935865	-0.116125	0.299442	0.235203	#DIV/0!	#DIV/0!	#DIV/0!	#DIV/0!
CG5938	FBgn0046247	0.149816	0.198019	-0.0553252	-0.090729	-0.0759883	-0.0833586	0.298923	0.103309	#DIV/0!	#DIV/0!	#DIV/0!	#DIV/0!
Prx6005	FBgn0031479	-0.00499818	-0.0358124	-0.0203548	0.0143581	0.156221	0.0852894	0.298377	0.158239	0.128537	0.203361	0.305893	0.254627
Acon	FBgn0010100	0.441399	0.72421	-0.299904	-0.138993	-0.168822	-0.153908	0.298219	0.283909	-0.226647	-0.0779339	0.0821151	0.0020906
CG15628	FBgn0031632	0.429732	0.175552	0.0164069	-0.0319982	-0.0221701	-0.0270842	0.298176	0.350722	0.205014	0.278785	0.222554	0.250669
jigr1	FBgn0039350	0.277428	0.192732	-0.0446053	-0.0967921	0.0697335	-0.0135293	0.298091	0.253278	#DIV/0!	#DIV/0!	#DIV/0!	#DIV/0!
alpha-Est2	FBgn0015570	0.344259	0.313837	-0.112004	0.030623	0.115767	0.073195	0.298084	0.136022	#DIV/0!	#DIV/0!	#DIV/0!	#DIV/0!
mRpS31	FBgn0036557	0.362536	0.156155	0.163875	0.143796	0.21424	0.179018	0.298059	0.614859	-0.943377	-0.622775	-0.478759	-0.550767
Ance-5	FBgn0035076	0.310903	-0.166763	0.00677022	0.0997338	0.177235	0.138484	0.297786	0.143058	0.369343	0.161402	0.0313012	0.0963518
CG4610	FBgn0034735	0.185738	-0.0199924	0.0500501	0.110762	0.160676	0.135719	0.2976	0.404877	-0.104375	-0.179038	-0.325994	-0.252516
CG5498	FBgn0027565	0.0930022	-0.134949	0.156822	0.0389101	0.0738381	0.0563741	0.296843	-0.022982	0.462612	0.34487	0.246918	0.295894
Oscillin	FBgn0031717	0.0816794	0.1177	0.153529	0.0665426	0.152074	0.109308	0.296569	0.382825	0.182222	0.0113879	0.322722	0.167055
ND23	FBgn0017567	0.622466	0.434025	-0.0397986	0.0414708	0.100902	0.0711862	0.29629	0.131361	-0.187691	-0.145114	0.0201185	-0.0624978
CG8112	FBgn0037612	0.485612	0.115128	-0.794386	-0.111982	-0.0700779	-0.0910298	0.296278	0.0267394	#DIV/0!	#DIV/0!	#DIV/0!	#DIV/0!
CG11236	FBgn0031860	0.492241	0.331789	-0.0848347	-0.0143909	0.0730294	0.0293192	0.295849	0.364141	#DIV/0!	#DIV/0!	#DIV/0!	#DIV/0!
CG30285	FBgn0050285	0.349958	0.236974	-0.0614138	-0.043095	-0.0267066	-0.0349008	0.295738	0.191285	#DIV/0!	#DIV/0!	#DIV/0!	#DIV/0!
CG9338	FBgn0032899	0.134008	0.094446	0.0552947	-0.0233726	-0.00385856	-0.0136156	0.295212	0.189299	0.442287	0.186548	0.0503178	0.118433
CG5171	FBgn0031907	0.434751	0.724294	-0.0224832	0.00584647	0.0715823	0.0387144	0.295178	0.594841	0.151039	0.19727	0.40748	0.302375
D1	FBgn0000412	0.205253	0.208578	0.0143084	0.014234	0.0326255	0.0234297	0.295153	0.317777	-0.071351	0.17118	-0.10363	0.033775
CG3270	FBgn0033093	0.486887	0.44305	-0.355494	0.0593914	-0.017593	0.0208992	0.294971	0.303595	-0.269079	0.291182	0.50004	0.395611
levy	FBgn0034877	0.4633	0.520085	-0.203236	-0.117427	-0.10779	-0.112608	0.293417	0.223955	-0.287012	0.123505	0.0477733	0.0856392
CG6463	FBgn0047038	0.0172205	0.153395	-0.207559	-0.0910765	-0.066424	-0.0787502	0.293215	0.0970096	-0.307936	#DIV/0!	#DIV/0!	#DIV/0!
CG1427	FBgn0037347	0.202517	0.0565556	-0.0254126	-0.0413105	0.0255011	-0.00790469	0.292821	0.15344	#DIV/0!	#DIV/0!	#DIV/0!	#DIV/0!
ssp3	FBgn0032723	-0.188017	-0.0966774	0.146094	0.022134	-0.0041353	0.00899936	0.29235	0.23385	#DIV/0!	#DIV/0!	#DIV/0!	#DIV/0!
CG9312	FBgn0038179	-0.174787	-0.208956	0.0279236	0.0376924	0.0597329	0.0487127	0.291882	-0.0543692	#DIV/0!	#DIV/0!	#DIV/0!	#DIV/0!
CG13623	FBgn0039205	0.864974	0.726251	-0.0759239	0.106439	0.180513	0.143476	0.291622	0.0162735	0.0619817	0.444598	0.817543	0.631071
Gpdh	FBgn0001128	0.471168	0.89412	-0.281837	-0.189403	-0.258807	-0.224105	0.291597	0.155872	-0.130697	-0.179304	-0.308505	-0.243905
gfzf	FBgn0250732	0.323054	0.110576	-0.0545426	-0.201368	-0.115213	-0.158291	0.291395	0.356604	0.224318	-0.0678231	-0.180679	-0.124251
CG32022	FBgn0052022	-0.00288372	0.109909	0.228251	0.0723416	0.0330005	0.052671	0.290326	0.261892	#DIV/0!	#DIV/0!	#DIV/0!	#DIV/0!
tko	FBgn0003714	0.000947218	-0.225958	0.00810773	0.116929	0.192736	0.154832	0.29018	0.606801	#DIV/0!	#DIV/0!	#DIV/0!	#DIV/0!
CG10673	FBgn0035590	0.233561	-0.0729803	0.32438	0.149814	0.233216	0.191515	0.289839	0.352114	-0.343167	-0.26853	-0.202337	-0.235433
CG10581	FBgn0037046	0.637589	0.272852	0.133258	0.0506903	0.203339	0.127015	0.289239	0.26775	#DIV/0!	#DIV/0!	#DIV/0!	#DIV/0!
VhaAC45	FBgn0262515	0.117734	0.0823973	0.0327315	0.0385197	0.0130864	0.0258031	0.288249	0.301564	0.137489	0.162611	0.157712	0.160161
glob1	FBgn0027657	0.057221	0.11502	-0.00416009	0.0734568	0.130049	0.101753	0.288083	0.387623	0.186141	0.2915	0.367828	0.329664
CG17337	FBgn0259979	0.164866	0.0656339	-0.0130075	0.0337841	0.0083064	0.0210453	0.287915	0.280097	0.0670294	0.134681	0.211335	0.173008
Fdh	FBgn0011768	0.343924	0.177287	-0.0714973	0.0059091	0.0343608	0.0201349	0.287832	0.120555	-0.170558	-0.111991	0.0820216	-0.0149845
ubl	FBgn0022224	0.0187544	-0.000775595	0.0660205	-0.0165185	0.0151952	-0.000661671	0.287407	0.0516836	0.168368	-0.123045	0.0935407	-0.0147523
CG5001	FBgn0031322	0.178317	0.129278	0.0316421	-0.0719884	-0.0723501	-0.0721692	0.287177	0.1838	0.17238	-0.0385168	0.00477	-0.0168734
CG12004	FBgn0035236	0.126846	0.00553426	-0.00589698	0.000147298	0.0062865	0.0032169	0.286669	0.332294	#DIV/0!	#DIV/0!	#DIV/0!	#DIV/0!
GstE9	FBgn0063491	-0.258735	-0.275599	-0.0128048	0.0305572	0.066199	0.0483781	0.286313	0.33296	-0.0102942	0.150264	0.367455	0.258859
CG9486	FBgn0031791	-0.27235	-0.0826512	-0.707003	-0.362229	0.0400045	-0.161112	0.285972	-0.0605994	-0.491523	-0.300576	-0.272971	-0.286773
Spp	FBgn0031260	-0.00429025	0.0184279	0.145336	0.0440579	0.0571147	0.0505863	0.285744	0.300514	0.147846	-0.164425	-0.414958	-0.289692
CG16713	FBgn0031560	0.0576647	-0.344544	0.31044	0.0239245	0.158184	0.0910541	0.285265	0.0646908	0.409563	0.415406	0.711637	0.563521
mus209	FBgn0005655	-0.618851	-0.650198	0.28464	0.661771	0.697868	0.67982	0.285036	0.174765	-0.0998664	-0.326184	-0.178954	-0.252569
Cbl	FBgn0020224	-0.0873028	-0.236907	0.0341942	-0.00269064	0.0347766	0.016043	0.284539	0.224519	#DIV/0!	#DIV/0!	#DIV/0!	#DIV/0!
CG9601	FBgn0037578	0.0220543	-0.293364	0.182842	-0.00353567	0.278996	0.13773	0.283874	0.218672	#DIV/0!	0.169883	-0.111303	0.02929
Top1	FBgn0004924	0.0527143	0.0205789	-0.0183545	-0.065805	-0.0852251	-0.0755151	0.283796	-0.00642576	-0.462272	-0.260368	-0.38508	-0.322724
CG10433	FBgn0034638	-0.438571	-0.335796	0.12297	0.116926	0.09984	0.108383	0.28348	0.0620791	#DIV/0!	#DIV/0!	#DIV/0!	#DIV/0!
CG12344	FBgn0033558	-0.0049979	-0.150727	-0.111497	-0.0791915	-0.0664445	-0.072818	0.283403	0.179089	#DIV/0!	#DIV/0!	#DIV/0!	#DIV/0!
CG12391	FBgn0033581	0.50126	0.390062	-0.0384191	-0.00661017	0.0129875	0.00318867	0.283031	0.408046	-0.292936	-0.041022	-0.0409007	-0.0409613
Obp57c	FBgn0034509	0.36739	0.335358	0.0352678	0.0148911	0.0416136	0.0282524	0.282763	0.101722	0.151625	0.162055	0.180671	0.171363
CG14933	FBgn0040968	-0.125364	-0.488002	0.0890003	0.209196	0.470067	0.339631	0.281968	0.228552	0.442781	0.183715	0.188672	0.186193
Cyt-b5	FBgn0264294	0.129138	-0.0664802	0.010547	0.004022	0.0446147	0.0243184	0.281543	0.301643	-0.530157	-0.356344	-0.611086	-0.483715
CG6734	FBgn0032395	-0.284356	-0.561431	0.00722709	0.132559	0.358188	0.245373	0.281198	0.204673	#DIV/0!	#DIV/0!	#DIV/0!	#DIV/0!
Nurf-38	FBgn0016687	-0.0713666	0.0311313	-0.008875	0.0432072	0.0430119	0.0431096	0.280998	0.285076	0.0983309	0.185923	0.318231	0.252077
CG42326	FBgn0259226	0.326495	-0.73943	-0.324616	-0.165491	0.164895	-0.000297884	0.280384	0.0991798	#DIV/0!	#DIV/0!	#DIV/0!	#DIV/0!
CG11110	FBgn0034535	0.643176	0.610203	-0.188329	-0.149431	-0.150974	-0.150202	0.278969	0.116066	-0.492175	-0.225846	-0.109609	-0.167728
CG11851	FBgn0039293	-0.00418426	-0.368661	0.0643624	0.0209699	0.357562	0.189266	0.278514	0.331093	#DIV/0!	#DIV/0!	#DIV/0!	#DIV/0!
CG4950	FBgn0036587	0.187757	-0.174252	-0.0166348	0.0454489	0.200524	0.122987	0.278501	0.364052	0.201737	-0.218861	-0.31948	-0.269171
CG2371	FBgn0030323	0.594491	0.503684	0.0809666	-0.105579	0.0513356	-0.0271219	0.278425	0.235237	#DIV/0!	#DIV/0!	#DIV/0!	#DIV/0!
qless	FBgn0051005	0.187501	0.132392	-0.279056	-0.180638	-0.183823	-0.182231	0.277266	-0.0178577	-0.819799	-0.987581	-0.769876	-0.878729
gprs	FBgn0024232	-0.196911	-0.405941	-0.268542	-0.316051	-0.0174174	-0.166734	0.277159	0.298163	#DIV/0!	#DIV/0!	#DIV/0!	#DIV/0!
pain	FBgn0060296	-0.0167431	-0.184974	0.110492	0.0838672	0.106433	0.0951501	0.277157	0.194977	0.31865	0.257089	-0.0653974	0.0958457
Vha100-2	FBgn0028670	0.22969	0.0731439	0.053939	0.0237999	0.00138426	0.0125921	0.276752	0.227705	0.222057	0.209687	0.0700033	0.139845
CG14445	FBgn0029851	0.290823	0.289254	-0.124547	-0.151784	-0.115411	-0.133598	0.276729	0.291754	0.478475	#DIV/0!	#DIV/0!	#DIV/0!
SPoCk	FBgn0052451	-0.0352325	0.0278225	-0.0742861	-0.0599933	-0.073291	-0.0666421	0.27601	0.364138	0.225214	0.169957	-0.134447	0.0177549
CG5377	FBgn0038974	0.407035	0.528477	0.075917	0.109401	0.146489	0.127945	0.275825	0.0868674	0.266802	0.326064	0.431569	0.378816
Mp20	FBgn0002789	0.123237	-0.0498528	0.100589	-0.0309953	-0.00439006	-0.0176927	0.275593	-0.0294972	0.248787	0.134886	0.148711	0.141799
Efr	FBgn0029849	0.113889	-0.00786965	-0.072086	-0.0385605	0.01416	-0.0122002	0.275403	0.305492	#DIV/0!	#DIV/0!	#DIV/0!	#DIV/0!
CG8001	FBgn0035268	0.346602	0.419988	0.0831141	-0.0680411	-0.0477269	-0.057884	0.274376	0.307965	#DIV/0!	#DIV/0!	#DIV/0!	#DIV/0!
CG8993	FBgn0035334	0.471909	0.412118	-0.140834	-0.078079	-0.0190956	-0.0485873	0.274358	0.106653	-0.148963	-0.0601433	0.0555998	-0.00227174
asun	FBgn0020407	-0.257763	-0.433312	0.0538825	0.0931419	0.350962	0.222052	0.274239	0.00132292	#DIV/0!	#DIV/0!	#DIV/0!	#DIV/0!
Hil	FBgn0050147	-0.0786871	-0.155886	0.0509926	-0.036703	0.0272032	-0.00474988	0.274188	0.177757	0.108428	-0.00349246	-0.047374	-0.0254332
Glut1	FBgn0264574	-0.0915012	0.0800178	-0.180725	-0.0821912	-0.153198	-0.117695	0.274087	0.343812	0.356325	0.01754	0.0264249	0.0219825
CG14741	FBgn0037989	-0.0858173	-0.0915898	-0.0285468	-0.0646573	-0.0751049	-0.0698811	0.273844	0.164187	#DIV/0!	#DIV/0!	#DIV/0!	#DIV/0!
CG17985	FBgn0033199	0.0640415	-0.415471	0.0613859	-0.0144747	0.317631	0.151578	0.273254	0.463054	#DIV/0!	#DIV/0!	#DIV/0!	#DIV/0!
CG14898	FBgn0038437	0.682974	0.90755	-0.1853	-0.0743867	-0.000278976	-0.0373328	0.273064	0.224261	-0.601463	0.00651357	-0.00689252	-0.000189477
CG32667	FBgn0052667	-0.387612	-0.126358	-0.0300993	0.0517187	0.0369478	0.0443333	0.272811	0.433237	-0.56321	-0.147302	-0.0624888	-0.104895
CG5196	FBgn0038039	0.0330619	-0.0606495	-0.0237842	-0.0267534	0.0344837	0.00386515	0.272784	0.149318	#DIV/0!	#DIV/0!	#DIV/0!	#DIV/0!
CG5149	FBgn0031904	0.139189	0.203509	-0.135556	-0.133821	-0.104512	-0.119167	0.272666	0.415792	-0.0229977	0.121609	0.0431392	0.0823742
CG17026	FBgn0036550	0.206471	-0.132141	-0.243478	-0.116766	-0.071574	-0.09417	0.272628	-0.179362	-0.0312128	-0.266857	-0.185125	-0.225991
nes	FBgn0026630	0.0434565	-0.0103998	-0.01662	0.00425281	0.0227262	0.0134895	0.272559	0.217166	0.266676	-0.0944207	-0.185767	-0.140094
Pkcdelta	FBgn0259680	0.068472	0.0643303	-0.22506	-0.22914	-0.236103	-0.232622	0.272131	0.161182	-0.0873303	0.0163043	-0.0921267	-0.0379112
CG15537	FBgn0039770	0.105329	0.118581	-0.0125378	-0.120033	-0.0473073	-0.0836704	0.272037	0.167315	-0.247364	-0.283853	-0.0632715	-0.173562
MrgBP	FBgn0033341	0.273641	0.0119849	0.186046	0.0585455	0.172919	0.115732	0.271808	0.126511	#DIV/0!	#DIV/0!	#DIV/0!	#DIV/0!
CG9297	FBgn0038181	-0.0995032	0.0797745	-0.409855	-0.335851	-0.368653	-0.352252	0.270138	0.18957	0.167122	0.0909993	-0.0119428	0.0395283
CG31195	FBgn0051195	-0.0915013	-0.304614	0.0741324	0.0266382	0.0642166	0.0454274	0.270008	0.289932	0.462451	0.371861	0.0164026	0.194132
CG6746	FBgn0032394	0.772774	0.169337	-0.0523262	-0.0800798	0.0415413	-0.0192692	0.269864	0.165587	0.0752789	-0.0339344	-0.140663	-0.087299
SdhC	FBgn0037873	0.428803	0.495848	-0.173118	-0.0556508	-0.0420161	-0.0488335	0.269747	0.283409	-0.32463	-0.137819	-0.385192	-0.261506
CG10467	FBgn0035679	0.364038	0.0861443	-0.229057	0.0276464	0.0766536	0.05215	0.269211	0.166129	-0.281671	0.168804	0.443706	0.306255
CG12582	FBgn0037215	0.209758	0.319725	0.0312397	0.0620964	0.0258656	0.043981	0.268527	0.0577635	-0.0329778	0.0685744	0.0431887	0.0558815
CG9657	FBgn0029950	0.301724	0.0078272	-0.322127	-0.100368	-0.0158601	-0.0581139	0.268427	0.337039	#DIV/0!	#DIV/0!	#DIV/0!	#DIV/0!
Cat	FBgn0000261	0.586579	0.218229	0.0994169	-0.0049091	0.0458698	0.0204803	0.268261	0.267559	0.185929	0.198453	0.445565	0.322009
CG11790	FBgn0039265	0.0787586	-0.122347	0.156725	0.0417472	0.106992	0.0743696	0.267751	0.344092	0.0192932	-0.194893	-0.323661	-0.259277
CG10947	FBgn0032857	0.185412	0.176596	-0.357437	-0.297437	-0.330542	-0.313989	0.267088	0.147238	#DIV/0!	#DIV/0!	#DIV/0!	#DIV/0!
GstE6	FBgn0063494	0.224097	-0.0582556	-0.0154526	0.0450848	0.176684	0.110885	0.267031	0.251383	0.39512	0.477019	0.840489	0.658754
coil	FBgn0033265	-0.0667457	-0.158905	0.165714	0.0753876	0.245226	0.160307	0.266581	0.180901	#DIV/0!	#DIV/0!	#DIV/0!	#DIV/0!
mRpS11	FBgn0038474	0.174144	-0.0540695	-0.166151	-0.0903941	0.00939646	-0.0404988	0.266234	0.352847	-1.0707	-0.451291	-0.713609	-0.58245
colt	FBgn0019830	0.249513	0.341738	-0.153136	-0.0194556	-0.0203423	-0.0198989	0.265655	0.141896	0.382403	0.361449	0.219437	0.290443
fat-spondin	FBgn0026721	0.0848357	-0.166303	-0.0105786	0.0740263	0.118311	0.0961687	0.265136	-0.233391	#DIV/0!	#DIV/0!	#DIV/0!	#DIV/0!
CheB42b	FBgn0066293	0.220723	0.399538	-0.231071	-0.060921	-0.0280306	-0.0444758	0.264995	0.444014	#DIV/0!	#DIV/0!	#DIV/0!	#DIV/0!
CG33303	FBgn0053303	0.0688196	-0.108544	0.196948	0.0755723	0.18012	0.127846	0.264887	0.252061	-0.0380918	0.0618752	-0.138089	-0.0381068
SdhB	FBgn0014028	0.512905	0.274067	-0.175668	-0.0750831	-0.064856	-0.0699696	0.26488	0.22274	-0.273322	-0.0313239	0.132057	0.0503663
CG9796	FBgn0038149	-0.0278634	-0.00286262	0.0805287	0.0310194	0.0592665	0.0451429	0.263964	0.394878	0.665132	0.412332	0.120903	0.266618
CG9914	FBgn0030737	0.13371	-0.110065	-0.123475	0.0617777	0.134657	0.0982172	0.263852	0.427796	-0.188746	0.00834417	0.461587	0.234966
Nhe3	FBgn0028703	0.218527	0.161007	-0.0537641	-0.0812729	-0.0724514	-0.0768621	0.263454	0.390904	-0.0422912	-0.113679	-0.462024	-0.287852
CG7970	FBgn0035252	-0.198395	-0.165747	-0.11773	0.0299524	0.0320312	0.0309918	0.263394	0.214112	#DIV/0!	#DIV/0!	#DIV/0!	#DIV/0!
Myd88	FBgn0033402	0.0841559	-0.0329952	0.0426734	-0.00253798	0.0017862	-0.00037589	0.26339	0.33118	-0.04294	-0.224164	-0.114519	-0.169341
serp	FBgn0260653	-0.471236	-0.347828	0.161698	-0.587558	-0.235711	-0.411635	0.263316	0.735365	#DIV/0!	#DIV/0!	#DIV/0!	#DIV/0!
RpL22-like	FBgn0034837	0.606878	0.810679	0.613228	-1.49856	-1.66945	-1.584	0.262116	0.132142	#DIV/0!	#DIV/0!	#DIV/0!	#DIV/0!
ClC-c	FBgn0036566	-0.0507711	-0.131771	-0.00144649	-0.0103434	-0.00916091	-0.00975218	0.261753	0.163846	0.07434	-0.187028	-0.430121	-0.308574
CG30381	FBgn0050381	0.184764	0.0158483	-0.0225869	-0.0753041	0.244465	0.0845807	0.261597	0.281609	#DIV/0!	#DIV/0!	#DIV/0!	#DIV/0!
CG11892	FBgn0039313	-0.235594	0.032746	-0.687872	-0.120756	-0.331024	-0.22589	0.261589	0.220263	-0.783653	-0.270027	-0.205136	-0.237582
CG8303	FBgn0034143	-0.398592	-0.605769	0.419764	0.0824689	0.22766	0.155065	0.261587	0.398527	0.373162	0.492377	-0.0280565	0.23216
CG34454	FBgn0085483	0.722687	0.544564	-0.0106119	-0.133506	-0.0244846	-0.0789954	0.261338	0.300674	0.378792	0.486533	0.817804	0.652169
CG9471	FBgn0037749	0.563323	0.294989	-0.262477	-0.081104	-0.037775	-0.0594395	0.261152	0.0663618	-0.21891	-0.102726	-0.00721702	-0.0549713
ben	FBgn0000173	0.0629071	-0.00306984	-0.00985194	-0.0342197	-0.0120453	-0.0231325	0.261009	0.295542	-0.215094	-0.199792	-0.121452	-0.160622
Tsp42Ea	FBgn0029508	-0.0127393	-0.105412	0.0100765	-0.0110379	0.031172	0.0100671	0.260612	0.333682	0.464643	0.277185	-0.0672268	0.104979
CG7079	FBgn0038849	-0.304111	0.0318228	-0.140861	-0.0590415	-0.0636985	-0.06137	0.260429	0.525349	#DIV/0!	#DIV/0!	#DIV/0!	#DIV/0!
CG33080	FBgn0053080	0.455863	0.180085	-0.193559	-0.0102917	0.0243542	0.00703125	0.259868	0.263302	#DIV/0!	#DIV/0!	#DIV/0!	#DIV/0!
CG18547	FBgn0037973	0.339228	0.217586	-0.112437	0.0675419	0.140207	0.103875	0.259789	0.438947	0.0896249	0.542639	0.594515	0.568577
CG7461	FBgn0034432	0.227493	0.22415	-0.0272937	0.0161911	0.0109518	0.0135715	0.258706	0.189784	0.144987	0.226036	0.230603	0.22832
CG5321	FBgn0030575	-0.126904	-0.208112	0.0505501	0.125456	0.279168	0.202312	0.258446	0.379271	0.280589	0.215346	0.29067	0.253008
CG4306	FBgn0036787	-0.273334	-0.0338272	0.0413823	0.151697	0.163613	0.157655	0.257984	0.0197041	-0.0135506	-0.0300975	0.194123	0.0820129
fh	FBgn0030092	0.704093	0.572445	-0.059441	0.0172651	0.0524665	0.0348658	0.257733	-0.00209829	0.098502	-0.0537874	0.0512144	-0.00128649
mRpS33	FBgn0038426	0.217197	0.0775604	0.130135	0.111773	0.194399	0.153086	0.257426	0.618571	-2.01873	-0.851638	-0.735153	-0.793396
CG8915	FBgn0030833	-0.393775	-0.667743	0.0394423	0.164767	0.597082	0.380924	0.256522	0.645376	#DIV/0!	#DIV/0!	#DIV/0!	#DIV/0!
wts	FBgn0011739	0.0759878	-0.0294325	-0.0436262	-0.0559299	-0.00732608	-0.031628	0.256017	0.201708	#DIV/0!	#DIV/0!	#DIV/0!	#DIV/0!
CG6683	FBgn0035902	-0.137941	-0.572673	0.100934	-0.154232	0.431244	0.138506	0.255662	0.163578	#DIV/0!	#DIV/0!	#DIV/0!	#DIV/0!
Prp38	FBgn0050342	-0.0538177	-0.177795	0.0658955	-0.0155599	0.0645677	0.0245039	0.255013	0.202486	#DIV/0!	#DIV/0!	#DIV/0!	#DIV/0!
CG30415	FBgn0250838	0.450442	0.452738	-0.162858	-0.0912573	-0.0759718	-0.0836145	0.255007	0.202997	-0.116976	-0.169309	-0.150132	-0.15972
Scox	FBgn0262467	0.0580247	0.142434	-0.0142708	0.0506379	0.141995	0.0963163	0.254794	0.214754	0.247125	0.0884934	-0.0571252	0.0156841
Fas3	FBgn0000636	-0.363802	-0.394547	0.102764	0.0777897	0.100592	0.0891908	0.253924	0.325744	0.278515	0.186246	-0.0302461	0.0779998
CG9140	FBgn0031771	0.25054	0.332371	-0.131239	0.0144382	0.0227669	0.0186025	0.253743	0.0766628	-0.237493	-0.142314	-0.00730253	-0.0748082
kuk	FBgn0038476	0.568811	0.485132	-0.0205425	-0.107016	0.000170794	-0.0534225	0.252995	0.316534	0.0939513	0.0382894	-0.105324	-0.0335173
CG4686	FBgn0038739	0.38577	0.521222	0.0327456	-0.0626326	-0.153132	-0.107882	0.252851	0.186919	0.305191	0.0730125	-0.330849	-0.128918
sbr	FBgn0003321	0.085763	0.0833361	0.0197819	-0.0483091	-0.0397056	-0.0440074	0.252464	0.249423	#DIV/0!	#DIV/0!	#DIV/0!	#DIV/0!
Hex-A	FBgn0001186	-0.0582038	0.156434	-0.0807884	-0.0847425	-0.150057	-0.1174	0.25238	0.23547	0.102406	0.0506474	0.184726	0.117687
CG8852	FBgn0031548	-0.04445	-0.171087	-0.156728	-0.172819	-0.159493	-0.166156	0.252253	0.112751	#DIV/0!	#DIV/0!	#DIV/0!	#DIV/0!
CG43729	FBgn0263980	0.0580666	0.437664	-0.300376	-0.31627	-0.396305	-0.356288	0.252236	0.131175	0.117116	-0.516239	-0.251538	-0.383889
CG17841	FBgn0028480	0.260517	0.14285	-0.00387993	0.0507341	0.0287332	0.0397337	0.252136	0.16068	#DIV/0!	#DIV/0!	#DIV/0!	#DIV/0!
dnc	FBgn0000479	0.168565	0.043505	-0.180158	-0.213695	-0.160355	-0.187025	0.252043	0.352023	0.224144	0.237409	0.149869	0.193639
CG3740	FBgn0023530	0.33751	0.22747	0.062197	-0.0304756	-0.0329437	-0.0317097	0.251873	0.244838	#DIV/0!	#DIV/0!	#DIV/0!	#DIV/0!
CG2059	FBgn0029942	0.219358	0.212299	-0.0314363	-0.0102874	0.0177127	0.00371265	0.25128	0.0289001	-0.0830869	0.0916662	0.0466456	0.0691559
CG3446	FBgn0029868	0.309042	0.348341	-0.168928	-0.0836475	-0.0868783	-0.0852629	0.251144	0.16286	-0.293033	-0.186712	-0.291516	-0.239114
rumi	FBgn0086253	-0.286296	-0.692302	0.0650439	0.106594	0.56908	0.337837	0.251106	0.168247	#DIV/0!	#DIV/0!	#DIV/0!	#DIV/0!
CG12279	FBgn0038080	0.0164683	-0.0241537	-0.225871	-0.0621484	0.0108634	-0.0256425	0.250884	0.320074	0.086501	0.139793	0.218496	0.179144
toc	FBgn0015600	-0.096751	-0.0861709	-0.120606	-0.148856	-0.18758	-0.168218	0.250599	0.169843	#DIV/0!	#DIV/0!	#DIV/0!	#DIV/0!
CG7979	FBgn0035848	0.0619248	-0.0534512	-0.0240807	-0.0227309	0.0334445	0.00535679	0.249681	0.200375	#DIV/0!	#DIV/0!	#DIV/0!	#DIV/0!
Nop60B	FBgn0259937	-0.262966	-0.67664	0.0485054	0.162186	0.28559	0.223888	0.249498	0.135813	-0.403362	-0.0611575	-0.155996	-0.108577
CG4984	FBgn0034267	0.20702	-0.029547	-0.276031	-0.734207	-0.43783	-0.586019	0.249379	0.405478	0.264174	0.00599115	-0.187966	-0.0909874
Reg-2	FBgn0016715	0.481017	0.236136	0.00341363	0.056304	0.162005	0.109154	0.249225	0.190863	0.40475	0.472865	0.679609	0.576237
CG5167	FBgn0038038	0.0518642	0.0715756	-0.0444499	0.0503218	0.0707596	0.0605407	0.248795	-0.214786	0.41352	0.501146	0.480896	0.491021
Jafrac2	FBgn0040308	0.214089	0.368536	-0.148645	-0.0409381	-0.091226	-0.0660821	0.248713	0.276433	-0.00276019	0.134918	0.0505355	0.0927266
Nrx-IV	FBgn0013997	-0.0541742	-0.11361	0.0185153	0.000238231	-0.00425687	-0.00200932	0.248535	0.298054	0.293351	0.155021	-0.172826	-0.00890247
CG1941	FBgn0033214	-0.0679262	-0.276836	-0.0480825	-0.0436162	0.0518567	0.00412025	0.248085	0.273621	0.0446289	-0.00563919	-0.467982	-0.236811
mRpL55	FBgn0038678	-0.0681438	-0.135833	-0.0990318	0.00518265	0.0791607	0.0421717	0.248057	0.816749	#DIV/0!	#DIV/0!	#DIV/0!	#DIV/0!
CG7889	FBgn0031003	-0.13483	-0.416282	0.198169	0.12697	0.35334	0.240155	0.247819	0.25343	#DIV/0!	#DIV/0!	#DIV/0!	#DIV/0!
elm	FBgn0037358	0.250306	0.256632	-0.10986	-0.0545229	-0.0615149	-0.0580189	0.247755	0.225527	-0.0920742	-0.141778	-0.0708582	-0.106318
Spase25	FBgn0030306	0.124	0.191514	0.107131	0.0205248	0.0208789	0.0207019	0.247608	0.280682	0.0142623	-0.0329194	-0.292298	-0.162609
wkd	FBgn0037917	0.0959275	-0.00753491	-0.0384232	-0.0228299	-0.00820371	-0.0155168	0.247541	0.265721	0.0865734	0.144002	0.00741805	0.0757098
beta4GalT7	FBgn0039258	0.0713576	-0.255706	0.159823	0.0579068	0.260368	0.159137	0.247372	0.183191	#DIV/0!	#DIV/0!	#DIV/0!	#DIV/0!
CG16985	FBgn0035355	0.520873	0.245839	-0.139243	-0.0637574	0.0841679	0.0102052	0.246925	0.317021	-0.252493	-0.0625232	0.0690404	0.00325858
Apc10	FBgn0034231	0.227741	-0.184012	0.193755	-0.0175146	0.294837	0.138661	0.246561	0.0140792	#DIV/0!	#DIV/0!	#DIV/0!	#DIV/0!
CG6852	FBgn0036820	0.348408	0.355328	-0.0205652	-0.0439247	-0.0502085	-0.0470666	0.246457	0.227416	0.106253	0.0525194	0.118337	0.0854282
CG5191	FBgn0038803	0.18682	-0.416168	0.0966443	-0.0395958	0.101229	0.0308165	0.24629	0.0830778	#DIV/0!	#DIV/0!	#DIV/0!	#DIV/0!
CG12814	FBgn0037796	-0.183944	-0.275135	0.113419	-0.0633183	-0.0516814	-0.0574999	0.245075	0.169497	0.415991	0.198598	-0.106863	0.0458676
CG7791	FBgn0033038	0.153545	-0.00743844	0.113326	0.154486	0.187718	0.171102	0.245063	0.228947	0.0458807	-0.138002	-0.186004	-0.162003
mal	FBgn0002641	0.256998	-0.19068	-0.0510421	0.068617	0.296044	0.18233	0.244877	0.310944	#DIV/0!	#DIV/0!	#DIV/0!	#DIV/0!
inx2	FBgn0027108	0.0719105	-0.162736	-0.184329	-0.130109	-0.100927	-0.115518	0.24413	0.329451	0.244663	0.232036	-0.185147	0.0234444
CG2201	FBgn0032955	0.29376	0.274407	0.0478615	0.00485878	-0.0311524	-0.0131468	0.243881	0.173121	0.385239	0.204281	0.238852	0.221567
CG31207	FBgn0051207	-0.146969	-0.0356818	-0.109688	-0.0557646	-0.0556964	-0.0557305	0.243795	0.33015	0.384441	0.315355	0.124495	0.219925
CG13319	FBgn0033781	0.397407	0.156514	0.0734219	-0.160002	-0.0306804	-0.0953414	0.243631	0.00694249	#DIV/0!	#DIV/0!	#DIV/0!	#DIV/0!
gus	FBgn0026238	0.0766349	-0.0927956	-0.0237974	-0.0924304	-0.0373466	-0.0648885	0.243554	0.198252	#DIV/0!	#DIV/0!	#DIV/0!	#DIV/0!
CG31821	FBgn0051821	0.19082	-0.508476	-0.278149	0.0153482	0.223732	0.11954	0.243325	-0.410826	-0.0159818	0.118319	0.354477	0.236398
Glg1	FBgn0264561	0.0396911	-0.120995	-0.00112852	-0.0129465	0.0522202	0.0196369	0.243094	0.229705	-0.0359539	-0.2019	-0.21077	-0.206335
yellow-e	FBgn0041711	0.415173	0.893089	-0.0127784	-0.0757333	-0.00102904	-0.0383812	0.242892	0.396216	-0.0114213	0.0328636	0.0186082	0.0257359
gbb	FBgn0024234	0.0383803	-0.124931	0.0790139	0.0273899	0.0721662	0.049778	0.242625	0.254111	#DIV/0!	#DIV/0!	#DIV/0!	#DIV/0!
CG1824	FBgn0030403	0.0647279	0.125141	-0.231015	-0.143214	-0.155856	-0.149535	0.242364	0.202227	0.0793841	-0.00932738	-0.191411	-0.100369
CG6067	FBgn0029828	-0.398825	0.00568905	-0.105554	0.0453444	0.0545606	0.0499525	0.242283	0.283668	-0.223814	-0.0667624	-0.0401553	-0.0534589
Cyp6a13	FBgn0033304	0.178923	0.23144	0.14755	0.192966	0.226476	0.209721	0.242206	0.209928	0.296952	0.141888	-0.151091	-0.0046016
mub	FBgn0262737	-0.0760742	-0.0161081	-0.0212836	-0.0841704	-0.120422	-0.102296	0.241891	0.288535	#DIV/0!	#DIV/0!	#DIV/0!	#DIV/0!
CG3759	FBgn0032116	-0.0725038	-0.66247	0.0930858	0.0266994	0.228531	0.127615	0.241829	-0.193133	#DIV/0!	#DIV/0!	#DIV/0!	#DIV/0!
f-cup	FBgn0028487	0.215884	0.340508	-0.152535	-0.186309	-0.220334	-0.203321	0.24177	0.269957	0.485447	0.170645	0.374221	0.272433
Tsf2	FBgn0036299	-0.583877	-0.747617	0.109109	0.0290882	0.110657	0.0698724	0.241106	0.273111	0.57757	0.331827	0.0955303	0.213679
CG13284	FBgn0032614	0.847	0.138854	-0.136445	-0.0972166	0.0582619	-0.0194774	0.240879	0.167478	-0.0263869	0.231741	-0.134678	0.0485311
tws	FBgn0004889	0.135695	-0.070219	0.0625136	0.0687901	0.132149	0.100469	0.240772	0.845503	-0.888146	-1.34959	-1.98469	-1.66714
CG6421	FBgn0025827	0.449603	0.36603	-0.0126033	-0.00164836	0.0299575	0.0141546	0.240485	-0.00411183	#DIV/0!	#DIV/0!	#DIV/0!	#DIV/0!
CG2930	FBgn0028491	-0.304377	-0.127412	-0.405453	0.0828359	-0.0771686	0.00283367	0.240382	0.528933	-0.573864	0.137319	-0.14898	-0.00583084
Syx5	FBgn0011708	0.0202087	-0.0845811	0.0595403	0.012276	0.0371481	0.024712	0.240278	0.157035	0.37919	0.158271	0.0823654	0.120318
CG2022	FBgn0037292	-0.471653	-0.890467	-0.219347	-0.187966	-0.225203	-0.206584	0.240091	-0.297193	0.182359	-0.379899	-0.923716	-0.651807
CG6018	FBgn0034736	-0.38844	-0.8707	-0.405127	0.0960702	0.378114	0.237092	0.239975	0.336733	#DIV/0!	#DIV/0!	#DIV/0!	#DIV/0!
Hmu	FBgn0015737	0.0651859	-0.219364	0.0197088	0.0144065	0.0206069	0.0175067	0.239411	-0.226505	-0.0385962	-0.0198977	0.0988958	0.0394991
CG10188	FBgn0032796	-0.0519082	-0.34672	-0.0498775	-0.019535	0.21894	0.0997024	0.238838	0.113259	#DIV/0!	#DIV/0!	#DIV/0!	#DIV/0!
ttk	FBgn0003870	0.0363082	-0.267348	0.0674526	0.00698325	0.0678653	0.0374243	0.238553	0.131714	#DIV/0!	#DIV/0!	#DIV/0!	#DIV/0!
CG9363	FBgn0037697	0.0574664	0.121976	0.0257258	0.0536765	0.167805	0.110741	0.238265	0.659581	-0.462531	-0.565571	-0.585219	-0.575395
CG16965	FBgn0032387	0.339819	-0.121963	0.0670849	0.0295165	0.255558	0.142537	0.238239	0.0958622	0.639831	0.154117	0.282966	0.218542
CG5027	FBgn0036579	0.118515	-0.311818	0.0250679	-0.0296073	0.137029	0.053711	0.237703	0.220261	#DIV/0!	#DIV/0!	#DIV/0!	#DIV/0!
Bap170	FBgn0042085	0.00509579	-0.307232	0.131852	0.0489423	0.242495	0.145719	0.237637	0.324348	#DIV/0!	#DIV/0!	#DIV/0!	#DIV/0!
CG6206	FBgn0027611	0.0880579	0.820901	-0.0580993	0.0587771	0.0782549	0.068516	0.237163	0.474115	0.217909	0.150437	0.291099	0.220768
CG17260	FBgn0031498	-0.0997769	-0.0412009	0.126828	0.127525	0.0642741	0.0958995	0.236956	0.210181	#DIV/0!	#DIV/0!	#DIV/0!	#DIV/0!
T3dh	FBgn0017482	-0.195621	-0.451925	-0.312253	0.094619	0.288927	0.191773	0.23669	0.211311	-0.164816	0.0778591	0.180303	0.129081
ptr	FBgn0003159	-0.0522954	0.0371314	-0.042813	0.0367851	-0.00914616	0.0138195	0.236233	0.454237	0.110891	0.217921	0.171652	0.194786
DhpD	FBgn0261436	0.257274	0.164577	0.0033318	-0.0221419	0.0799743	0.0289162	0.236178	0.38711	0.215149	0.212166	0.402605	0.307386
CG1307	FBgn0026566	0.157328	0.13004	0.150589	0.0573787	0.10044	0.0789094	0.235921	0.239651	0.109978	0.033929	0.216397	0.125163
Cpr67Fb	FBgn0036110	0.912018	0.123429	0.362582	-0.061236	0.468216	0.20349	0.235447	-0.0864745	#DIV/0!	#DIV/0!	#DIV/0!	#DIV/0!
CG11961	FBgn0034436	-0.197988	-0.0548227	-0.194418	0.0764722	0.0595073	0.0679898	0.235017	0.519567	-0.0616503	0.385679	-0.201118	0.0922807
nocte	FBgn0261710	-0.0550705	-0.113043	0.034553	-0.018979	-0.0228562	-0.0209176	0.234548	0.245887	-1.22177	-1.71872	-1.91363	-1.81617
CG12105	FBgn0035241	0.771705	0.850456	-0.566315	-0.432965	-0.714495	-0.57373	0.234469	0.126518	-0.342803	-0.207911	-0.165174	-0.186543
CG8412	FBgn0037743	-0.0615899	-0.0747073	0.0196069	-0.0635432	-0.0172786	-0.0404109	0.234423	0.432219	0.112207	#DIV/0!	#DIV/0!	#DIV/0!
pgant4	FBgn0051956	0.864808	-0.12397	0.119564	-0.0228795	0.225288	0.101204	0.233449	-0.188187	-0.416795	0.0145928	0.0683999	0.0414964
CG3800	FBgn0034802	0.149345	0.18581	0.114712	0.0622498	0.0618734	0.0620616	0.233193	0.19865	-0.167588	-0.2613	-0.170568	-0.215934
CG14715	FBgn0037930	-0.10018	-0.264471	0.0141853	0.0331024	0.106323	0.0697127	0.232431	0.249855	0.000309535	0.100978	0.0856899	0.0933338
CG14407	FBgn0030584	0.496601	0.593509	-0.0698565	0.0469411	0.0659251	0.0564331	0.232072	-0.0516393	-0.162792	-0.0604884	0.117692	0.0286018
Ssdp	FBgn0011481	0.066734	-0.0169733	-0.031387	-0.0321555	-0.00955124	-0.0208534	0.232042	0.340889	#DIV/0!	#DIV/0!	#DIV/0!	#DIV/0!
CG14777	FBgn0026872	-0.028845	-0.0339295	-0.15074	-0.136285	-0.183195	-0.15974	0.232041	0.57148	#DIV/0!	#DIV/0!	#DIV/0!	#DIV/0!
CG5611	FBgn0039531	0.306888	-0.0137662	-0.243676	-0.217616	-0.108085	-0.16285	0.231811	0.289656	-0.279529	0.116293	-0.0654788	0.025407
pug	FBgn0020385	0.213544	0.0601629	0.0931938	0.12999	0.179917	0.154954	0.23165	0.141092	0.37264	0.251308	0.345704	0.298506
CG14830	FBgn0035755	-0.753116	-0.795092	-0.0735885	-0.048822	0.179628	0.0654031	0.23147	0.242655	0.268184	0.107933	-0.315405	-0.103736
Df31	FBgn0022893	0.171793	0.0881467	-0.0364556	-0.0187157	0.0149091	-0.0019033	0.231312	0.359201	-0.0012461	0.244116	0.0789575	0.161537
CG11137	FBgn0037199	0.175212	-0.0757588	-0.0520362	-0.0126279	0.0591187	0.0232454	0.230905	0.101167	0.22532	-0.0466723	0.0737107	0.0135192
Cen	FBgn0032876	0.00127124	-0.14949	0.0380301	-0.0197629	0.0209481	0.000592566	0.23086	0.285072	-0.263982	-0.147754	-0.224362	-0.186058
CG34150	FBgn0083986	0.379811	0.326887	-0.106738	0.0373566	0.121907	0.0796317	0.230819	-0.11266	-0.0714457	0.305718	0.477668	0.391693
cos	FBgn0000352	-0.248638	-0.40475	0.129155	0.185345	0.371929	0.278637	0.230061	-0.127288	#DIV/0!	#DIV/0!	#DIV/0!	#DIV/0!
kappaTry	FBgn0043471	0.407462	0.211273	-0.351105	0.0334911	0.0239694	0.0287303	0.229413	0.651159	#DIV/0!	#DIV/0!	#DIV/0!	#DIV/0!
CG12173	FBgn0037305	0.116495	0.118385	-0.017959	0.0292363	0.0374368	0.0333366	0.229387	0.321234	0.04627	0.177109	0.164537	0.170823
CG4365	FBgn0037024	0.111933	0.297794	-0.0379467	0.0464051	0.00758803	0.0269966	0.229022	0.306662	0.0474358	0.166292	0.265069	0.215681
dally	FBgn0263930	0.0920965	-0.0988447	-0.0679054	-0.0770906	-0.0462362	-0.0616634	0.228909	0.107338	-0.210318	#DIV/0!	#DIV/0!	#DIV/0!
CG6867	FBgn0030887	0.0810685	-0.0765221	0.0340612	-0.0322472	0.0837104	0.0257316	0.228758	0.209049	#DIV/0!	#DIV/0!	#DIV/0!	#DIV/0!
CG13248	FBgn0036984	-0.00317011	-0.0222968	-0.106032	-0.0681013	-0.0203925	-0.0442469	0.228571	0.210103	#DIV/0!	#DIV/0!	#DIV/0!	#DIV/0!
CG14100	FBgn0036889	0.298032	-0.113641	-0.101655	-0.352564	-0.194238	-0.273401	0.228015	0.357705	#DIV/0!	#DIV/0!	#DIV/0!	#DIV/0!
CG16986	FBgn0035356	0.411289	0.291639	-0.218597	0.00418955	0.0429321	0.0235608	0.227992	0.1214	-0.125922	0.297313	0.450281	0.373797
Su(dx)	FBgn0003557	0.0766882	0.076696	0.00330366	-0.0188842	-0.0230238	-0.020954	0.227321	0.217585	#DIV/0!	#DIV/0!	#DIV/0!	#DIV/0!
CG9172	FBgn0030718	0.445275	0.510164	-0.0276152	0.0355545	0.0350376	0.0352961	0.227144	0.155369	-0.343526	-0.123505	-0.132055	-0.12778
CG10184	FBgn0039094	-0.487643	-0.801497	0.108665	0.246576	0.413702	0.330139	0.225827	-0.252685	0.590389	0.181773	0.475199	0.328486
CG10671	FBgn0035586	0.186487	-0.286607	0.0273975	-0.0493079	0.0637837	0.00723792	0.225821	0.413125	0.310412	0.0803042	-0.249589	-0.0846423
sni	FBgn0030026	-0.108181	-0.421426	0.159084	0.217273	0.257704	0.237489	0.225589	-0.847796	0.54089	0.471176	0.534228	0.502702
Swim	FBgn0034709	0.358514	0.199933	-0.0666603	-0.0494746	-0.00383517	-0.0266549	0.225528	0.245461	0.333062	0.252588	0.187733	0.22016
CG12262	FBgn0035811	0.209327	0.216717	0.015463	0.109085	0.174988	0.142036	0.225326	0.233786	0.0941996	0.24715	0.346209	0.29668
CG10133	FBgn0036366	-0.0274106	-0.32925	0.129126	0.149371	0.31581	0.23259	0.224005	0.217815	#DIV/0!	#DIV/0!	#DIV/0!	#DIV/0!
CG2247	FBgn0030320	0.0627891	-0.172568	0.210823	-0.00181248	0.138599	0.0683934	0.223581	0.194944	#DIV/0!	#DIV/0!	#DIV/0!	#DIV/0!
Cpr65Au	FBgn0042119	-0.140141	-0.109258	-0.170374	-0.0744551	-0.0458541	-0.0601546	0.223386	0.224884	0.536431	0.607252	0.745717	0.676485
CG4592	FBgn0032162	0.463148	0.0874998	-0.12455	-0.11611	0.00647304	-0.0548187	0.223193	0.166742	0.0252875	0.593028	0.824027	0.708527
CG6020	FBgn0037001	0.156838	0.321775	-0.205367	-0.0606973	-0.0932152	-0.0769563	0.223042	0.128869	-0.372595	-0.185474	-0.167853	-0.176664
l(3)02640	FBgn0010786	0.0886635	-0.0166786	-0.223864	-0.164964	-0.154478	-0.159721	0.222704	0.35874	-0.447567	-0.22882	-0.0283786	-0.1286
GlcAT-I	FBgn0066114	0.182232	0.0199502	-0.0888622	-0.091647	-0.0215335	-0.0565903	0.222195	0.169021	#DIV/0!	#DIV/0!	#DIV/0!	#DIV/0!
Cad87A	FBgn0037963	0.210568	0.32908	0.0137849	-0.0203856	0.0594496	0.019532	0.22183	0.289119	#DIV/0!	#DIV/0!	#DIV/0!	#DIV/0!
CG3437	FBgn0035998	-0.062132	-0.353647	-0.00916633	0.00835443	0.166842	0.087598	0.221793	0.298139	#DIV/0!	#DIV/0!	#DIV/0!	#DIV/0!
CG14246	FBgn0040608	0.78965	0.852153	-0.304003	-0.354733	-0.275735	-0.315234	0.220725	-0.0813367	0.254781	0.0592104	0.278628	0.168919
Pu	FBgn0003162	0.101989	0.195452	0.0731583	-0.0416775	0.0047634	-0.018457	0.220564	0.412605	0.105468	0.0269537	0.157751	0.0923524
CG1461	FBgn0030558	0.283665	-0.323705	0.0117915	0.0316471	0.121941	0.0767942	0.220286	-0.425225	-0.193755	-0.115249	0.0321935	-0.0415275
CG17737	FBgn0035423	0.0571449	0.166895	-0.0164374	-0.0113523	-0.0359025	-0.0236274	0.220265	0.218013	-0.502599	-0.403214	-0.340377	-0.371795
lin-52	FBgn0029800	0.151564	-0.0501235	0.00410959	0.00867178	0.131446	0.070059	0.220256	0.111385	#DIV/0!	#DIV/0!	#DIV/0!	#DIV/0!
wapl	FBgn0004655	-0.0165487	-0.147781	0.00396522	-0.0393443	0.00396228	-0.017691	0.220148	0.200879	#DIV/0!	#DIV/0!	#DIV/0!	#DIV/0!
CG9008	FBgn0028540	0.399027	0.317363	0.0368415	0.0989309	0.193533	0.146232	0.220114	0.268994	-0.181029	-0.103211	-0.0847072	-0.093959
CG1970	FBgn0039909	0.149769	0.275342	-0.0427761	-0.00785386	0.00954389	0.000845016	0.220079	0.0608459	-0.0981136	-0.0886039	0.0264813	-0.0310613
CG15160	FBgn0032688	0.0276309	-0.261945	0.0265288	-0.021393	0.138346	0.0584766	0.219816	0.35839	#DIV/0!	#DIV/0!	#DIV/0!	#DIV/0!
CG7536	FBgn0030890	0.0117529	-0.245443	-0.106661	-0.0259848	0.00100208	-0.0124913	0.218993	0.271171	#DIV/0!	#DIV/0!	#DIV/0!	#DIV/0!
Prat	FBgn0004901	0.0222671	-0.356378	0.0547564	0.149732	0.292845	0.221288	0.218438	0.224479	0.242416	0.274794	0.346507	0.31065
vlc	FBgn0259978	0.284285	0.205575	0.0220862	-0.0171362	0.00731413	-0.00491103	0.218383	0.2112	0.147508	0.142291	0.237146	0.189718
tou	FBgn0033636	0.0797945	-0.00160579	0.153191	-3.66586e-05	0.0323078	0.0161356	0.218342	0.240428	#DIV/0!	#DIV/0!	#DIV/0!	#DIV/0!
CG14516	FBgn0039640	-0.299491	-0.357325	0.148538	0.0719822	0.268063	0.170023	0.218074	0.432987	-0.369197	-0.208354	-0.433974	-0.321164
Ahcy89E	FBgn0015011	0.60367	0.455621	-0.0621969	0.0032737	0.0502123	0.026743	0.217693	0.287298	0.0404144	0.0814612	0.173378	0.12742
CG5543	FBgn0034908	0.188829	-0.130382	0.511494	0.167057	0.395321	0.281189	0.217664	0.238365	#DIV/0!	#DIV/0!	#DIV/0!	#DIV/0!
Cul-5	FBgn0039632	-0.013917	-0.180174	0.0759144	-0.00821073	0.106889	0.0493393	0.217261	0.245517	#DIV/0!	#DIV/0!	#DIV/0!	#DIV/0!
CG3214	FBgn0031436	0.66609	0.563032	-0.142422	-0.106711	-0.0483508	-0.0775308	0.217217	0.063682	-0.407138	-0.183442	-0.0854574	-0.13445
CG6364	FBgn0263398	0.229988	0.135909	0.063115	-0.0520893	0.0021828	-0.0249532	0.216836	0.185162	0.123078	0.0616312	0.0569855	0.0593084
CG9740	FBgn0037669	0.443109	0.3074	0.117356	-0.0811033	0.0248494	-0.0281269	0.216636	0.0768934	#DIV/0!	#DIV/0!	#DIV/0!	#DIV/0!
l(2)06225	FBgn0010612	0.559427	0.714572	-0.19489	-0.150896	-0.1443	-0.147598	0.216278	0.157666	-0.16754	-0.179301	-0.151078	-0.16519
RFeSP	FBgn0021906	0.437064	0.508552	-0.121867	-0.0419981	-0.0273673	-0.0346827	0.216268	0.048733	0.108287	0.172364	0.191444	0.181904
CG31300	FBgn0051300	0.724308	0.138454	-0.274915	0.0262222	0.174538	0.10038	0.216157	0.187749	#DIV/0!	#DIV/0!	#DIV/0!	#DIV/0!
veil	FBgn0034225	-0.334225	-0.478193	-0.412871	0.124997	-0.0733378	0.0258295	0.216048	0.203005	-0.0218799	0.25306	0.0465912	0.149826
CG10320	FBgn0034645	0.29975	0.527287	-0.12254	-0.0501705	-0.0176409	-0.0339057	0.2159	0.171249	-0.22382	-0.22245	-0.269331	-0.245891
NAAT1	FBgn0029762	-0.357405	-0.469987	0.123721	0.0596033	0.0790105	0.0693069	0.21577	0.0430106	0.811169	0.650607	0.280176	0.465391
Tsp42Ef	FBgn0033127	-0.0893294	-0.143299	0.108867	0.0246587	0.0330028	0.0288307	0.215308	0.17601	0.582876	0.235379	0.0104413	0.12291
CG13917	FBgn0035237	0.393873	0.09239	-0.00567824	-0.0204834	-0.0292371	-0.0248602	0.215232	0.212219	-0.3453	-0.618273	-0.538429	-0.578351
Mlp60A	FBgn0259209	0.237155	0.492359	0.082286	-0.0654237	-0.0983273	-0.0818755	0.215069	0.157214	0.220379	0.141101	0.272284	0.206692
t	FBgn0086367	-0.0424548	-0.393113	-0.342257	-0.0379561	0.0566051	0.00932451	0.214908	0.0521674	0.104814	0.172638	0.186889	0.179764
CG42668	FBgn0261550	0.114561	0.167592	-0.0550575	-0.0252071	-0.0355518	-0.0303794	0.214705	0.312207	0.217326	0.14613	-0.110133	0.0179982
CG14903	FBgn0038446	0.268734	0.120121	0.202913	0.108626	0.237216	0.172921	0.214043	0.132842	0.110282	0.115246	0.275605	0.195426
CG3683	FBgn0035046	0.483286	0.680053	-0.296338	-0.205836	-0.243562	-0.224699	0.21399	0.0753925	-0.145411	-0.0819584	0.0432651	-0.0193467
Mrtf	FBgn0052296	-0.176734	-0.309557	0.0698009	0.0407462	0.0346136	0.0376799	0.213754	0.0862392	#DIV/0!	#DIV/0!	#DIV/0!	#DIV/0!
ATPsyn-b	FBgn0019644	0.156591	0.426513	-0.270809	-0.177111	-0.218012	-0.197562	0.213746	0.140894	-0.0797348	-0.146437	-0.106098	-0.126268
drongo	FBgn0020304	-0.0250691	-0.19541	0.0406991	-0.0138821	0.00945547	-0.00221329	0.213658	0.0622057	-0.0555531	-0.142649	-0.0523666	-0.0975079
lt	FBgn0002566	0.237086	0.216612	0.0451818	0.0206207	0.00280769	0.0117142	0.213281	-0.0427322	0.640443	0.216513	0.274163	0.245338
CG11752	FBgn0030292	0.444646	0.572503	-0.267211	-0.147874	-0.111972	-0.129923	0.213238	0.170079	-0.379678	-0.250089	-0.217497	-0.233793
CG1648	FBgn0033446	-0.131369	0.113653	0.0200048	0.0437081	0.00841602	0.0260621	0.213003	0.377653	-0.0532817	0.0406064	0.134642	0.0876241
CG32069	FBgn0052069	0.0592534	0.0239251	0.236476	0.0975045	0.114656	0.10608	0.212726	0.309844	#DIV/0!	#DIV/0!	#DIV/0!	#DIV/0!
CG43707	FBgn0263846	-0.320304	-0.351388	0.0830082	-0.016828	-0.103129	-0.0599784	0.212621	0.0515043	0.0979916	0.229021	0.0334169	0.131219
vari	FBgn0250785	-0.177793	-0.110597	0.0417888	0.0249167	0.0263287	0.0256227	0.212544	0.228704	0.243583	0.201355	0.106038	0.153696
pds5	FBgn0260012	0.218048	-0.021277	0.0145545	-0.0676409	-0.0255013	-0.0465711	0.212377	0.312027	#DIV/0!	#DIV/0!	#DIV/0!	#DIV/0!
SmF	FBgn0000426	0.0986175	-0.0898827	0.268852	0.0435908	0.277351	0.160471	0.211727	0.305498	-0.0277528	-0.296568	-0.201411	-0.248989
CG6136	FBgn0038332	-0.372178	-0.165089	0.489023	0.0893154	0.379288	0.234302	0.211152	0.432563	0.0232329	0.198762	0.246397	0.222579
grh	FBgn0259211	0.0070647	-0.00166883	0.0205176	0.0657117	0.0866373	0.0761745	0.21112	0.386788	#DIV/0!	#DIV/0!	#DIV/0!	#DIV/0!
CG13506	FBgn0034723	-0.116707	-0.146143	-0.100235	-0.14894	-0.164988	-0.156964	0.211036	0.0202367	0.0875316	-0.0181458	-0.165486	-0.0918158
path	FBgn0036007	0.0258909	-0.141041	0.0365542	0.0781703	0.117291	0.0977305	0.210977	0.340614	0.595088	0.395484	0.166659	0.281072
GlcAT-P	FBgn0036144	0.0546298	-0.0123088	-0.0194954	0.0424441	0.0191218	0.030783	0.210809	0.260715	#DIV/0!	#DIV/0!	#DIV/0!	#DIV/0!
Dhc93AB	FBgn0013812	-0.066083	-0.114215	-0.211558	-0.120671	0.0949178	-0.0128768	0.21066	0.269899	-0.222378	-0.0883544	-0.148421	-0.118387
VhaM9.7-b	FBgn0028663	0.0765774	0.0568768	0.108397	0.0867661	0.0875974	0.0871817	0.209706	0.189427	0.24526	0.185764	-0.0426774	0.0715435
aru	FBgn0029095	0.486475	0.307132	0.0281557	0.00463451	-0.0245401	-0.00995281	0.209557	0.135749	0.0476829	-0.0118066	-0.130704	-0.0712554
NHP2	FBgn0029148	-0.241332	-0.370816	0.121732	0.0950059	0.177619	0.136312	0.209246	0.190188	-0.634619	-0.0814068	-0.27181	-0.176608
arm	FBgn0000117	0.0557304	0.0325323	0.0303065	0.00147925	-0.00972059	-0.00412067	0.208959	0.214304	0.0121589	-0.131848	-0.0919712	-0.11191
Cyp12a4	FBgn0038681	-0.246939	0.316464	-0.126611	0.0400896	0.0962693	0.0681794	0.208821	0.76372	0.500905	0.211082	0.120029	0.165556
CG9628	FBgn0036433	-0.104052	-0.0461222	-0.0381323	-0.0275228	-0.01218	-0.0198514	0.208813	0.0320906	-0.0629689	-0.66905	-0.6195	-0.644275
Ppox	FBgn0020018	0.242476	0.29673	0.0747291	0.017887	0.0468542	0.0323706	0.208351	0.0579712	-0.145986	-0.104396	-0.116661	-0.110528
CG18507	FBgn0028527	0.112141	0.0793756	-0.0483696	0.00597189	0.0460264	0.0259991	0.208299	0.358345	0.36226	0.342108	0.266693	0.3044
msta	FBgn0053548	0.356167	0.282739	0.256128	-0.0530204	-0.134654	-0.0938374	0.208255	0.236358	0.099207	-0.0315066	-0.0528133	-0.04216
MRG15	FBgn0027378	0.142354	0.0516425	0.05766	-0.00104017	0.0661771	0.0325685	0.208147	0.370689	0.146744	0.210911	0.249492	0.230201
CG16712	FBgn0031561	0.0024995	-0.177998	0.126883	0.0454633	0.106688	0.0760756	0.208146	-0.167006	0.416487	0.323597	0.491372	0.407485
CG12766	FBgn0035476	0.644265	0.289307	-0.420645	0.0712318	0.201895	0.136563	0.208086	0.368827	-0.355768	0.3183	0.380321	0.349311
CG9034	FBgn0040931	0.576701	0.633216	-0.135811	-0.0509865	-0.0225493	-0.0367679	0.208078	0.0874473	-0.206676	-0.0623473	0.0751107	0.00638169
shot	FBgn0013733	0.0509583	0.133126	-0.00820258	-0.0138712	-0.0973086	-0.0555899	0.208065	0.129811	0.200005	0.216401	0.180154	0.198277
Pex5	FBgn0023516	0.333351	0.29349	-0.0363061	0.00182194	0.00640788	0.00411491	0.207659	0.326485	#DIV/0!	#DIV/0!	#DIV/0!	#DIV/0!
ste24a	FBgn0034176	0.0429333	-0.0572847	0.0801941	0.045451	0.0615626	0.0535068	0.207414	0.1198	0.32143	0.1836	0.0731428	0.128371
blos4	FBgn0036105	-0.081409	-0.355097	-0.000672413	-0.0197033	0.141163	0.06073	0.206609	0.138634	#DIV/0!	#DIV/0!	#DIV/0!	#DIV/0!
CG16912	FBgn0035064	0.0836292	0.0427669	-0.160564	-0.14068	-0.119455	-0.130068	0.206445	-0.158748	-0.0831765	-0.0320996	0.100466	0.0341834
CG5073	FBgn0038331	-0.0559753	-0.20561	-0.112325	-0.0534016	-0.0658927	-0.0596471	0.206132	0.147101	-0.0699723	-0.00576271	0.0938784	0.0440578
gry	FBgn0035416	-0.204078	-0.363523	-0.00722812	0.0345583	0.100898	0.0677282	0.205892	0.179097	0.00201949	0.236378	0.06781	0.152094
Lrt	FBgn0034540	0.533553	0.144344	0.271364	0.0322204	0.151371	0.0917955	0.205335	-0.0159017	#DIV/0!	#DIV/0!	#DIV/0!	#DIV/0!
CG7712	FBgn0033570	0.499283	0.470921	-0.134107	-0.0500042	-0.0133107	-0.0316574	0.205314	0.0477764	-0.303699	-0.107018	0.00635567	-0.0503314
RpL36A	FBgn0031980	-0.0992628	-0.13073	0.0383703	0.0557404	0.0591693	0.0574548	0.205215	0.144113	-0.352587	-0.597154	-0.516797	-0.556976
e(y)3	FBgn0087008	-0.0687033	-0.254106	0.0217762	0.0305544	0.0657079	0.0481311	0.20514	0.254388	#DIV/0!	#DIV/0!	#DIV/0!	#DIV/0!
VhaSFD	FBgn0027779	0.0318959	0.0762806	0.0658415	0.0323275	-0.00869485	0.0118163	0.205055	0.197802	-0.0639539	0.0380769	0.00523772	0.0216573
HmgZ	FBgn0010228	0.419436	0.162126	0.0134456	-0.0632647	-0.0372236	-0.0502441	0.204968	0.100886	-0.637382	-0.385107	-0.376121	-0.380614
CG10254	FBgn0027512	0.275741	0.524529	-0.0751546	-0.186167	-0.298319	-0.242243	0.20462	0.110604	#DIV/0!	#DIV/0!	#DIV/0!	#DIV/0!
CG34141	FBgn0083977	-0.467808	-0.888297	-0.0280611	0.143612	0.609464	0.376538	0.204382	0.0428294	#DIV/0!	#DIV/0!	#DIV/0!	#DIV/0!
CG30005	FBgn0050005	0.217416	-0.073522	-0.0239539	-0.00779037	0.0965471	0.0443784	0.204164	-0.146281	0.381424	0.383612	0.373217	0.378414
[truncated: 8,241 more rows]

[truncated: 10 more sheets: Fig6A, Fig6B, Fig7A, Fig7F, Fig8A, Fig8B, Fig9A, Fig9B, Sup Fig S1A&C, Sup FigS1 B]
